# Supplementary material for: Cupid: simultaneous reconstruction of microRNA-target and ceRNA networks
Source: HighWire-hosted journal article supplement (doi:10.1101/gr.178194.114), 2014-11-05
Supplement: Table_S2.xlsx [file Table_S2.xlsx]

## Sheet: All AGO binding sites
Identifier	Genomic Location (hg19)	Binding Site Sequence
CCR1	chr5:44812067-44812107[+]	TAAACCAGACAAACTTCCATTATTCAAACGGCAGTATGAAA
CCR2	chr12:28734377-28734417[+]	AGCTGCACTTACCAACCTTATACTGGGAATTACTCTGTATA
CCR3	chr15:93586668-93586708[-]	CGTGTACATACTGTAAATTATTTATTAATGGCTAAATGCAA
CCR4	chr14:103988722-103988762[-]	GAGCGCCCACAACAACCACATGGCCAAGGTGCTGACCCCCG
CCR5	chr1:16266091-16266131[+]	GGAGTGGTGCTGCTACCTTGTATGTTTACATAATGCTTTAG
CCR6	chr12:56636160-56636200[-]	CCCACTCCTAGCCTGGCCCCTAACCACGCACTTTAACCTTG
CCR7	chr7:156752688-156752728[+]	CGACATTTTGAAAAAACTGATTGGAACTTTCACCGAAAAAG
CCR8	chr5:56472079-56472119[+]	TGAAGTAACTCTATGTCAAATAGTCGTAGGTTAAGTATCTT
CCR9	chr9:86570519-86570559[-]	AAAGGGATACCAATAACTAGTGCCTCGTACTACGCGACAGT
CCR10	chr3:40558117-40558157[+]	ATTAAGCTCCAACACAGCCTTGACTCAGCATCAGCGAATTC
CCR11	chr18:158650-158690[+]	CTCGTCAGGCCCAGCTCTCCTGCGCCGCCGCCTCCCGCCGC
CCR12	chr3:124515243-124515283[-]	GAGTGCGACAACTTCTCCTGTGCCAGGAACAAGGGAGTCCT
CCR13	chr1:244220431-244220471[+]	CTTGGAGCATTATCTTTAGTTACTTGAAGAGTTTCTAGTTT
CCR14	chr2:61622311-61622351[-]	AAGTAACATATTAGGGGCATTCTGTGATATGAATGTAAGTG
CCR15	chr2:97267386-97267426[-]	CCCCATCCGAGGAGTCCTCTTCCCAGGTGCTGCCCTCCAGC
CCR16	chr3:43391845-43391885[+]	AGAGAAGTTTATAAAGGGCATTGGCAATAAACTCTTTGTTG
CCR17	chr1:25170670-25170710[+]	TGCATGTATTTTCTTTTATCTTTGGAACATCAGCACCAGTA
CCR18	chr6:31748706-31748746[-]	AGCCACCTGACTGCTCCCACTCCACCCTCAGGGCCTCCACA
CCR19	chr14:65205427-65205467[+]	CTTGGAGTTGATGACTGACCTCTACCTCTGCAGGGAAAGGG
CCR20	chr4:95210994-95211034[+]	TCAGTATTTTTGTAATTATTTCTACCTCCAAATATATATAT
CCR21	chr15:63559850-63559890[+]	AAGCCAATTCATTAACTGTGTACTGATACTGATGCTATGTT
CCR22	chr5:115166973-115167013[-]	GCGTTTTGGTTTCACATCTTTGCTGGGGAATAATAGGGGAA
CCR23	chr1:16721744-16721784[+]	CTGACTTACTTGCACTGTGATCCCCCTTGCTCCGCCCACTG
CCR24	chr7:99635226-99635266[+]	TAAACTTGATGAATATTATATGTGAGGAAAACTTTCATGTA
CCR25	chr8:55060132-55060172[+]	TAAAGATGAACTCTTCAAAATGCTCTGTACTAGGAAGGATC
CCR26	chr4:40825712-40825752[-]	TAGAAAATCTTATGACCTCATCCAACAAGGAGGACTGGCTG
CCR27	chr11:58892097-58892137[+]	GTGAAAATCCAAACATGGAATGCATTCTTTTTCATGTTGTT
CCR28	chr1:90182343-90182383[+]	CTTTGGGTGAATTTACTCAGTGCTGCTTTGAGTTGTATACA
CCR29	chr9:22008963-22009003[-]	TTACGGCCAACGGTGGATTATCCGGGCCGCTGCGCGTCTGG
CCR30	chr17:73017298-73017338[+]	ATGTTGTCAAACCTTAATAATGCACCTCATGTATTAGTCAC
CCR31	chr1:90475687-90475727[+]	TTGTTGACTATCAAAACAAATCCACCAATGTGACAGTTGCT
CCR32	chr16:71763135-71763175[-]	TATGCCCCATCACATCTTCTTTACTGTAAAAATATTAAAAA
CCR33	chr17:17699790-17699830[+]	GCTCCTCGACAACAGCCACTTGCCCGCCACATTCAAGGTCT
CCR34	chrX:153671692-153671732[+]	GCCCCATGCCTTTCCTTTAGTGGTGGGAAACCCTTATCTTG
CCR35	chr3:9542809-9542849[-]	TTGAACTTGCAGGTCATCTCTGAACAGGGTACCCCTGTCCC
CCR36	chr19:35996626-35996666[-]	ATTTTAAATCCAAGCTGGGTTTCATCAACTGGGATGCCATA
CCR37	chr9:34241353-34241393[+]	AGCCACAATGCCACCTCCTATTAACCCCATCCTCGCCAGCT
CCR38	chr1:54387275-54387315[-]	AAATGCTCTTGCATGATTTTTTAACAATATATTTAAACAGG
CCR39	chr1:204118896-204118936[-]	GCTGTGCCCCCAAACTCTACTGCACCTTCCAGAATGGGCTG
CCR40	chr11:9610528-9610568[+]	GCTAAAAGACTCATTACTACTCAGCCTTCAATGTACCTGTG
CCR41	chr10:72185926-72185966[+]	GAATGGCTGCTATGTGTTTCTGGCACTCATTCCTAACCAAG
CCR42	chr13:26787624-26787664[-]	CAGTAGGTTAAGAATCAATCTTCTTTTTCTTAATAGTACAG
CCR43	chr1:167394211-167394251[+]	GCTGACTGCTGCATACACATTTCACTTTTTTTCCTTTGACA
CCR44	chr9:36375951-36375991[-]	GACCAAGCCAACATCACTTCTCAGGGGAACGATGCAACACA
CCR45	chr11:46789122-46789162[-]	AAAAGGCCAAAGCTCCAGGATTATCCTCTAAAGCAAAGGTA
CCR46	chr12:122989929-122989969[-]	GACTTTAATTTATTGAAAAATACAAATTTTTGTAAATATCA
CCR47	chr8:86121418-86121458[+]	TCATTCAGGACCTATCCATGTGCTGCTTATAAATAAAGAGT
CCR48	chr22:26888061-26888101[-]	GGGAAGCAGCTCTACACCTTTGGCCGCATTGTGATCTACAT
CCR49	chr1:244868915-244868955[+]	TGTATACCCTTTCTACAGAGTTGCCTCCCGAAGGAGTGGCT
CCR50	chr2:197701576-197701616[-]	ACAAGATACTTTGTAAAATTTACTGGGGAAAATCCATTTGG
CCR51	chr10:5791108-5791148[+]	TGTGCCGCCTTACGTCCAAATCCGAGATCTCCACGGGATCC
CCR52	chr1:110883724-110883764[+]	ATAGGACACCACCCTTACTATACAGAGATCGTGATAGGGAC
CCR53	chr22:24968002-24968042[+]	GGAGTGGGTGCTTGTGCATATATGCTAGGTATCTTTTGCCA
CCR54	chr2:96952832-96952872[-]	GGGAAGACCATCCACAAATATGTCCATCTGTTTCCCAAGTT
CCR55	chr15:69747844-69747884[+]	TAAACCTCTTTTATAACATGTTCAATAAAAAGCTGAACTTT
CCR56	chr6:17675463-17675503[-]	AAAAACCAGCATTCAACTTGTCTGCCTTTGGAACACTTTCC
CCR57	chrX:84525225-84525265[+]	TCGATGGTTTACTTGGCAGTTCTACTCTCCATGTACCTGTT
CCR58	chr3:38525206-38525246[+]	TCCTGTCTTAGGAAACCTAATGCTGCAAACTCTACCTAGAG
CCR59	chr4:69179383-69179423[-]	ACACGGTTCAGTAAAAATAATGCTGCTATCGAGTATGCAAA
CCR60	chr15:41594361-41594401[+]	TAAGTGATACTACTGGAGTTTGTGGGGCTCTGCAACCAAGA
CCR61	chr11:92626467-92626507[+]	TGAATTTCACTAAGGCTGCTTTCGAGAACAAAGTCTTTGGT
CCR62	chr19:59060484-59060524[+]	CACTGAGGACTACAACCTTATTGTTATTGAACGTGGCGCTG
CCR63	chr1:242045219-242045259[+]	AATCTGATTGCAATATTAAGTTACTTGACAGTCAAAGTGAC
CCR64	chr2:103347492-103347532[-]	TACAGGCTCCTCCTATGGCATTTTGCAACTCTTTTCTAGCA
CCR65	chr1:233518311-233518351[+]	AAGGAGAGAACTAAATCCCATGTGCCTTCATTACTGGATGC
CCR66	chr15:76580211-76580251[-]	TGCCCCGATTTCTGACATCATTGCAATCAAGTCACCTGACA
CCR67	chr2:64780049-64780089[+]	TTTGGGGATATAAATGCTGTTTCTTGCCAAGAGGAGACAAT
CCR68	chr13:25910327-25910367[+]	ATGTTCATTACTTTATTTAATCAGGTGATAAGTGGTGTAAT
CCR69	chr2:75920775-75920815[-]	TTTTAATGTTTTATCCTACTTAATGTGAACTTACCAGTTTT
CCR70	chr19:38799913-38799953[-]	CCCATCACCAAGCTCAAGTATTACTTTGCTGTGGACACCAT
CCR71	chr9:100202270-100202310[+]	TAAATGTGATTTTACATTATTTGCTGCTTTAAGTGTGATTC
CCR72	chr8:104337523-104337563[+]	CGACAAGTCATACAACATGATGGCCGGAACCAAGAAAAACT
CCR73	chr6:42985898-42985938[+]	AATGACATTCACAAGCTAGATACCAGCACCATGACATGGAC
CCR74	chr7:100028350-100028390[+]	GACCCGCTCAGTCTCAATACTTGCACTGATGAGGGCCATGT
CCR75	chr12:27081136-27081176[-]	GATTCATGAACATAACAAGCTTGCTGCAAATTCAGATCAGT
CCR76	chr5:151170460-151170500[+]	GGAAAGTGATGTCACAAAACTTCACCAACTGCCACACCAAG
CCR77	chr5:156566208-156566248[-]	ACGGCTTCATCCTATGCAGTTTGATCACAAGAAAGAACTGA
CCR78	chr15:68582032-68582072[+]	CAACGTGAACCATACCACAGTAACTAATTCAACCCCCCTGC
CCR79	chr7:74016698-74016738[+]	CCAATGTACATGGTGGACTATGCCGGCCTGAACGTGCAGCT
CCR80	chr2:106039116-106039156[-]	CAGTATTTAATTTTGATTTCTCTCACCTGGAGCATTTTTTT
CCR81	chr3:160150098-160150138[+]	GAATTGGACAAAATTACTTATGAAAGAGACAGTTTTAGACA
CCR82	chr19:40328346-40328386[-]	ATGCTCGACACCCACACAAATACCGCATGCTCATCGGTGAG
CCR83	chr21:37541250-37541290[-]	TTGCAAAGGAAGAAGGAGCTTAACGCCAGGAACAGGTTTTG
CCR84	chr11:3039862-3039902[-]	AAAGTCACTAAAAAACTTCATCACCATTAAAGATGCCTTGA
CCR85	chr13:36382370-36382410[-]	AGGTGGACTTTCCTTCTCCATACTGGGATAATGTTTCCGAT
CCR86	chr2:176974239-176974279[+]	AAGAGATCCCTTCCTTCCTCTTCGGTGAATGCAGGTTATTT
CCR87	chr17:56423314-56423354[-]	CCAGGTCTGTGCCTTCCCCATGCCAAGGACTCTAGGTCAAA
CCR88	chr19:12302370-12302410[+]	TGATTTCTTTCCAAGGACTATCAGGGACGTCCCTGTTGTCA
CCR89	chr12:109535493-109535533[+]	CCAGAAGACGCTCTACTCCTTTTTCTCCCCCAGCCCCGCCA
CCR90	chr19:17434278-17434318[-]	CGCCCTGCCTTCTCTTCTCATATGCAATATCAGTCATTCAC
CCR91	chr6:7251245-7251285[+]	TTGTTATTATTATTTGGGGTTTCTTGTGTTTTTTCTTTGCG
CCR92	chr11:87006837-87006877[+]	TTGAAAGGATTTACATTTTCTGCACTTAGGTAAGAAACATT
CCR93	chr14:94528517-94528557[-]	AGCGCCACCTGTAAGGCATATCCAAAGCGTCCTCTGCTTGG
CCR94	chr10:32094767-32094807[-]	GAAAAAGCCCTAAATCAGAATGTTTATATTTGCCTAAAGAT
CCR95	chr11:773516-773556[-]	GGCCCGTATCCTGCAGCACTTCCACTCTGAGAGCAGTAGGT
CCR96	chr6:117884132-117884172[-]	TGTGTTTCCCAAAGGGGTATTACTGGGCTCTTAAGTACCAA
CCR97	chr15:44094003-44094043[+]	GATGCGTGCTTTCTCAAATATACCTACTGGATTAATTTATG
CCR98	chrX:133915860-133915900[-]	ACCAATATGTTATCTCCAGATGCCGCGCAACTGTCTGATCT
CCR99	chr19:12811485-12811525[-]	TTTAAGAAGCTTCTGCTGTTTTGCCGGAATTGGCGGTGACT
CCR100	chr12:57625908-57625948[+]	GGGGACAGAGAACTGTGGAGTTGAAGGGAGTGGTTAAGTCC
CCR101	chr17:17000535-17000575[+]	GAGGTAAAAATCGGTTCATATTGTGGTTATGTATCTATTCT
CCR102	chr1:54502344-54502384[-]	GGGTGGATTTTAACTACAACTCTTGTCCTCTCGGTGATGGT
CCR103	chr5:138208263-138208303[-]	CCCATGTACCACAACTATCTTGCTGCTTAAAAGGAGACTTA
CCR104	chr13:42893745-42893785[+]	TTTGCTCCTTTGCAAACAAATGGTATCTAATTAATAACTAG
CCR105	chr10:81143209-81143249[-]	GAGCTGCAAGAAAATATTTATGGTGAGAACTTTTCTGTTTC
CCR106	chr10:64568119-64568159[+]	GATAATGTTTTAATAACAACTGTGGGATAAAAGTTATCTTC
CCR107	chr22:42609979-42610019[-]	TGCTGCAGGCTTCAAAGGGTTTGGACTAGAAGGGGTACCAG
CCR108	chr1:45205574-45205614[+]	TGCGCGTTTCTCTTCCTTGCTGACTCTCCGAATGGCCATGG
CCR109	chr22:38881258-38881298[-]	CGTTACTGAAAAATAACCATTTTAGTGTCAGGCTAGAAATT
CCR110	chr19:6392920-6392960[-]	ACGGCGACCTCGGCGACCCCTCACTCACCGCTTCCTCTTTC
CCR111	chr6:121770287-121770327[+]	TTCTGAAATGTAATCATTGATGCTTGAATGATAGAATTTTA
CCR112	chr22:32881145-32881185[+]	AGCTCCGCTACTCTCACCTGTGTGCCTTTGGGAAACCTGAT
CCR113	chr12:33047561-33047601[-]	AGATACAACTCTTCCATAAATGGAGGGAATGGAGCCATGAA
CCR114	chr4:41264035-41264075[+]	GTTATCCACCCAAGGCCAAATGACACCAGAAAGTTCTACCC
CCR115	chr1:92852648-92852688[+]	TGACTGATAACTAGTTTTATTCCAAGACATACCTTTACCTC
CCR116	chr3:87304465-87304505[+]	AGTGATGGGTGAAAACATTTTACCGGATTATGGAATGTTTA
CCR117	chr3:183402246-183402286[+]	AAAATGTCTTTTAACCATTATTACTTGACTATATGGTTGTA
CCR118	chr9:37426542-37426582[+]	CGAGTTGGCTACACCCCAGATGTCCTGACAGATACCACCGC
CCR119	chr12:112585882-112585922[+]	GCTGTAACCCTTCACGTGCCTTACCTTCACTCAATACTGGC
CCR120	chr11:28042428-28042468[-]	TTTACTATGCCACAACAAGTTGACTAGGACATTTTAGTAAA
CCR121	chr2:207024416-207024456[+]	CTTAAGACATGCCTATTTTATTAATTTACTTCCAAACGCAA
CCR122	chr18:51904848-51904888[+]	GAAGTCTTACTTTCGCCTTCTGGCCAGCAAATGTCTAATAT
CCR123	chr17:30693739-30693779[+]	CTGCATCTTCTAAAGCTCTGTTTCCTAGCACAGCACAAGTA
CCR124	chr11:122931414-122931454[-]	TATGAAACATTGGCCCTTTATGGTGGTGAATGATGCTGGCA
CCR125	chr4:155460255-155460295[-]	CAAAAAATCAGTTAGGGCTGTGGTTTTACATCCAAGACAGT
CCR126	chr2:219508099-219508139[-]	CTTTGTTCCCGGCTCTCCTCTATTACCTCTCACGTGGCTGA
CCR127	chr22:41645772-41645812[-]	TGCAGAAGGCTTTCAACTCCTCGTCCTTCAACTCCAACACC
CCR128	chr1:27105933-27105973[+]	GGGGGACACCACTGAGCATATCCAGACCCACTTCGAGAGCA
CCR129	chr12:42480452-42480492[-]	TGTGGTTTTAATTGGGTTGATGTGCATTTTTGAATATCACC
CCR130	chr21:34934253-34934293[+]	CTATTTGATATAAAACCTCTTTAAGCTGCTTAGAAGATTAG
CCR131	chr14:92604604-92604644[+]	CTAAGCAGGCCTTCCCTACTTATCACAGATTCATTCAATGC
CCR132	chr2:232672904-232672944[+]	TGATGCTGGGCTGTGTTTACTAAACCCACGGGTTTTCAGCC
CCR133	chr3:100025352-100025392[+]	ACCTCAGGCTCAAGGAGCAGTATCAATTCTGTTGATGTAAG
CCR134	chr10:124691754-124691794[-]	ACTTGTTATTTTAAATCCAGTACTGTACACTGAGTTAATAT
CCR135	chr20:49369036-49369076[+]	GGCTGCTAACTTTAATTCCTTGCCTGATTTTATTGTACAGT
CCR136	chr13:115089588-115089628[+]	TGGAATGATAAACCAAAAAATCAGTTGAACAAAGAAACAGA
CCR137	chr12:2907919-2907959[+]	TGGCGGAATCATTCGCAGAATACAGACTCGCGGTGAAGGCT
CCR138	chr19:44237919-44237959[-]	TTTGGGGTGAGAAAGGGGAGTCCATGAAGCCAAGCGATGTC
CCR139	chr15:91509621-91509661[-]	CTGTGCCTACTTTGCCTGAGTTCTTCTACCCCCGCAGTTGC
CCR140	chr6:131915425-131915465[-]	GACTTATCTGTATAACACTCTGCACTATTATGAAATGCACC
CCR141	chr20:35626271-35626311[-]	CCTTGAGCTTTATAAACAGATTTGTACCTGAGCCCCAGTGC
CCR142	chr7:105731110-105731150[-]	ATACAAGCTTATTCACATTTTGCTTCCTAATCTTTTTGTTG
CCR143	chr13:30086753-30086793[-]	TTGTAACATATTTTGATAAATACTAACTTATTTTGTTGGGG
CCR144	chrX:41208848-41208888[+]	CAGTACAAAAACACTGGCACTTGAATGTTGAATGTCACCGT
CCR145	chr3:150264559-150264599[+]	TCACCCGAGCGGTTTCTCTTTCCGGGACAACATGGCGCCGT
CCR146	chr11:3794896-3794936[-]	GGAGTTAGCACTAACATAAGTACCAAGCACCAGTGTATTAC
CCR147	chr3:41275643-41275683[+]	TGATTCGAAATCTTGCCCTTTGTCCCGCAAATCATGCACCT
CCR148	chr9:5468408-5468448[+]	ATTTTGTCGCCAAACTAAACTTGCTGCTTAATGATTTGCTC
CCR149	chr3:9506300-9506340[+]	TCACCAGTCACATCTCTTACTACTGCTAGTCGCTGCAACAC
CCR150	chr2:242179466-242179506[-]	CCAAGCCAGAATACCACAAATTCCTCATCGGCAAGGGGGGC
CCR151	chr1:229729547-229729587[-]	GAGGGCATGATCCTGGCAAATAGTCTTTCCTTTTCCGTAAT
CCR152	chrX:57934108-57934148[-]	TTCTTGAAAATTTTCGGGCATTTTGCAATTATTATTGTTTG
CCR153	chr17:46138826-46138866[+]	ATAAAATGGATGATTCATTCTTAAGTGCACTTTTTCCCCAC
CCR154	chr12:22796851-22796891[+]	GGTGTGCACCACAACTCTACTGTACCTTCAATAATGGACTA
CCR155	chr13:79189942-79189982[-]	AATCAAACCCCCAAGCTGCTTGTTTCAGACAGAGTTTTCCC
CCR156	chr6:79783050-79783090[-]	AAAACAGCTTTAATCTCATATGGTCGTTATAATGATGAATA
CCR157	chr2:44428363-44428403[+]	AAAACTGAAAAACATAATGCTCATGGTGCTGGGAATGGTTT
CCR158	chr5:72798360-72798400[+]	AGATGACAAAAAACTTCAGTTCTCCTTAAAGAAGTTAGGGG
CCR159	chr19:37211169-37211209[+]	AGTCAAAAGACAAATCTCAATCTACATCAGAGAATTCATAC
CCR160	chr18:56998290-56998330[-]	TTTTGACTACCATTTTCCTGTGTACTTCATCTATTTGTGTA
CCR161	chr2:70508521-70508561[-]	ACATTGATTTCAAAGGGTTTTATGCATTAAAGTGAAAGAAT
CCR162	chr1:149857534-149857574[-]	GAGCGTGTCTTTACTCATTGTGCTGCTTAGCCTTCCCAGGA
CCR163	chr16:88874632-88874672[+]	CGCCCACATCACTGCACGCCTGGCCCACCAGACACGTGCTG
CCR164	chr11:33773104-33773144[-]	TTACTGACTGGTTTACCTCTTATGTCAAAAATGTTGTATCA
CCR165	chr6:146126982-146127022[-]	GTTGATGAAGAATCTTATGGTGCACTTTATCAAGCTACTGT
CCR166	chr13:52607591-52607631[+]	TTTTTCATTCTCTTGGATTCTTTCCAGTGTGGTGCCTTTTA
CCR167	chr16:48286104-48286144[+]	CTCTGTTGATTACAGGCCTATGCCGTTTCCAGATTGTACAG
CCR168	chr13:50678889-50678929[+]	CAATGCAGACAAATATCAAATGGGAGATTGTTGCAAGGAAG
CCR169	chr14:20824469-20824509[+]	ATTTCCCAGTACCTACAATCTACCCATGCTCCCACACACAG
CCR170	chr19:44351486-44351526[+]	TTAAGTGCCTATCAACTCAATGTGCATCAGAGATTTCATAC
CCR171	chr12:120111759-120111799[+]	TTCCTTGCAGCCACAATAACTTTGTAGCCATCCTGGATCTG
CCR172	chr12:111908413-111908453[-]	CACCAGCTTACTCCACGCAATATGTTGCCTACAGTCCTCAG
CCR173	chr18:60793311-60793351[-]	GAATATGGAATATCCAATCCTGTGCTGCTATCCTGCCAAAA
CCR174	chr7:4810802-4810842[+]	ACCTGTGTTTTCATTTCAAGTGGGATACAGTATTTTTTTAA
CCR175	chr6:7583447-7583487[+]	GCTGATCGACAAAACAACCTTGGACAAACTATTGAAGGGGA
CCR176	chr2:177038977-177039017[-]	ACAATTAGAAATTCTGCCTATGGATGCAAATTTCATAGAAA
CCR177	chr13:24247727-24247767[+]	GACTCCAGGCCGACTCATGATACTCTGCATCTTTCCTACAT
CCR178	chr7:123324496-123324536[-]	AAATACTAAACACTACTTTCTGTCTGTGGATTCTGTAAAAT
CCR179	chr2:47129987-47130027[-]	GCTTTGCCAAGTGGATGCTTTTCAGTAACAGTGAAGTGGAG
CCR180	chr16:28975260-28975300[+]	GCATAAGCTGAGGTAGAACTTATCTTTAAGCTGCAGCAAAA
CCR181	chr5:53839118-53839158[+]	TTTGGCTGAAATTCACCACTTCCATCAAATTCGAGTGAGAG
CCR182	chr4:88998883-88998923[+]	GTAATACTGAGCACTTTACTTCTTAATAAAAACTTGATATA
CCR183	chr2:232673923-232673963[+]	GGGTTCTGTTATGAAATAAATGTTGCACTCCCTGCATCCCA
CCR184	chr13:108883176-108883216[+]	TGTGCAGGTTGCCATTGAATTTTGCTCTGGTGAATGCTGAG
CCR185	chr11:6630831-6630871[+]	CCGTATGGATCCCTCTACAATGTACTACATGAAGGCACCAG
CCR186	chr3:52435721-52435761[-]	AGGTCTTCTCTCTTCATTCCTCTTAGGAGAGTGCCAAACTC
CCR187	chr10:75897948-75897988[-]	AACACCTCACCACTACCTCATCAGTATCTACCGGGATAAGC
CCR188	chr1:179064142-179064182[+]	TGATTGACTACTTCATCCCCTTCCTGCCTTTGGAGTACCGT
CCR189	chr10:69676111-69676151[+]	AGTTCTTGTGGCAGTAACAGTGATAGTGGGACATGCCAGAG
CCR190	chr16:66754791-66754831[-]	CTGGCTTCAATAAACACGAATCCAGACTGCTTACAAGTTTT
CCR191	chr16:2051142-2051182[-]	GACCGAGAAGTAGCAGCTGCTGTCCGGGCCTCCGTGGCCGC
CCR192	chr16:67645129-67645169[+]	GAAGAACTTCAGGGGGCTTATGAAAATGAAGTGTCTAAAGA
CCR193	chr20:257833-257873[-]	CCAGCAGGTAGGGGAGCCCCTGCCCCTCTCCCACCAGACTG
CCR194	chr6:42995067-42995107[+]	CCCGTTCACCCATCTCATCTTTGCTCCTCAGGAGCAGCAAG
CCR195	chr11:8969304-8969344[-]	AGCTGACTTACTCATTTGACTTTTGCACTGACTGTATTATC
CCR196	chr10:34671578-34671618[-]	TCTCACTCAAGACTACCTCATAGCGCACACCCCTCGGGAAA
CCR197	chr3:42687495-42687535[+]	TTTGTAAATATCTGGCAACTTAGCTTAAGAAATGTAATGAC
CCR198	chr1:36521313-36521353[+]	CCAAGATACCTTACGCACAATGTACTTCGCTTAAATAGTCC
CCR199	chr3:136045700-136045740[+]	TGCATTCAATATTCCACTCATCACTTTTGTTGATGTCCCTG
CCR200	chr7:936046-936086[+]	GCGCATAAATAAACCCTTTCTACCGGGCTGTGCAACGCTGG
CCR201	chr7:92236831-92236871[-]	AATTAGACTAAGCCCCCAAATAAGCTGCATGCATTTGTAAC
CCR202	chr18:19781509-19781549[+]	ATGTAAACATTTTAACTTAATGGTACTTAAAATAATTTAAA
CCR203	chr6:56966289-56966329[+]	AACACAACATCCCCTCTAGATTCTACCTCAAAAGAAATGGA
CCR204	chr1:886563-886603[-]	CCGCTTCTACCCGCTGCGAATGCACTGCATCCGTGCCCTGA
CCR205	chr11:111592729-111592769[-]	AAGCAGCTACCCTAAATAAATGCCAGGCAAAACACGTTTCT
CCR206	chr7:108213938-108213978[+]	GTTTTTTTTTTTTGACAAATTCAACATTCAACGAGTAGACA
CCR207	chr2:68406303-68406343[-]	TTCCAGTGTCAACTGCCATGTGCTCTGCTTCAAGGGGGAAC
CCR208	chr6:13620514-13620554[+]	CCTTCATACATAATTCATTATATGGGCCAGGAACCAACAGG
CCR209	chr5:137089247-137089287[-]	GTGGTCAAGTTCCATCCGATTCAGGGCCATCGCGTGGAGGT
CCR210	chr1:116947338-116947378[+]	CTGAAAGAATACATTTTATATCTGGATTTTTACAAATAAAG
CCR211	chr1:68940922-68940962[-]	TAAAGGCAGGCAACTTTCATTTGCACTAATGTACATGCAAT
CCR212	chr17:76803532-76803572[-]	CTCCCAGACACCCACACACATGCCAACCATCCTAGACGACC
CCR213	chr4:146057366-146057406[-]	CACTAGAGGTTCCCTTTGCATGTTGCACTCTGTTCTCATTT
CCR214	chr22:26892159-26892199[-]	GGAGCCACTCTATTCCCCCATCCGTAGTAAGCTGTCCAGCG
CCR215	chr19:52520000-52520040[-]	AAGAGTAGTCTCATTACACATCAACAAACCCATACAGAAGA
CCR216	chr1:229773082-229773122[+]	AGCCTCTTGCCACCCTATCATGTGCATTATTTTCTTGTGTT
CCR217	chr22:35659787-35659827[+]	AGGATAGTGAACTTTACTTCTTGGGGACGGACACACACAAG
CCR218	chr1:234741770-234741810[-]	CAGTAACAGCCGCGTGGTGCTGCCAGGACTGCCCTTGGGCA
CCR219	chr6:111215300-111215340[+]	TAATGTTATTGAAACCAATTTCTACTTCATACTGATGTTTT
CCR220	chr19:57910945-57910985[+]	TCGTTACAACTCCAACCTCATTAAACATTGGAGAAATCACA
CCR221	chr9:108536164-108536204[+]	CAGACTTCTACTATGACATTTGCTCCTTTTGAGGATACATT
CCR222	chr17:73775102-73775142[-]	GCCTCATCGCTACAGGTAGGTCGGGCGGGGGAACAATGGCC
CCR223	chr1:244219493-244219533[+]	TTTTGTCTTTGTTTGCATTGTATAACTTTAACGAGTGAGTT
CCR224	chr4:103188706-103188746[-]	TGGGCTAGCTTTTGGCATTTTGGTGGGCAACAATTTCGCTC
CCR225	chr20:3181038-3181078[-]	GAAGCCAGCGGAAACTCACCTGTCGGGGAAAATTGGAGCTA
CCR226	chr11:47445689-47445729[-]	GAACAAAGACTCCTATCTGATCCTGGAGACGCTGCCCACAG
CCR227	chr19:4932724-4932764[+]	GGGGTCTAAGGCCCGGGCTTTCCTCCCAGCTACCCGGAGAA
CCR228	chr6:32139128-32139168[-]	TTCAAGATGGCCTTCTACAATGGCTGGATCCTCTTCCTGGC
CCR229	chr17:36916682-36916722[+]	AGGTTTGGCCCTTACTACACTGAGCCAGTCATTGCCGGGTT
CCR230	chr16:56468711-56468751[-]	GTAATTTCAGTATCCATATATTCCTGCACATATTACAAAGC
CCR231	chr11:94904563-94904603[-]	GGTAGTTCTGCATTTTTGGATTCCAGGATCCTGTTTGAAAT
CCR232	chr3:182988873-182988913[+]	AAGCTGTTTAATATCACTTATCTACTTCATTGCCTAAGTTC
CCR233	chr4:95377966-95378006[+]	AAACTTGGATATTTATCAAGTGCTGTGAATGCATCATCTCA
CCR234	chr1:111724877-111724917[+]	CTGTACAAATTACTTCCGTGTAATCTTCACAGGTGGTGTTG
CCR235	chr2:179365804-179365844[+]	AAAGAACCAGTATCTACACTTCACCGACTCTCCCAGCGACG
CCR236	chr6:28201208-28201248[+]	CTGCTAAACCCTTCTAATAATATAATAAATGGCACTGCCAC
CCR237	chr1:193054840-193054880[+]	TTTAAAAGTATACATGTCAATGGCCTCTTTGTCCATTATTC
CCR238	chr19:34302346-34302386[+]	CCCCGAGACCGGAGACGTCATGTGCAACTCCGTCAACGCCG
CCR239	chr11:118965393-118965433[-]	CCGTCCGCCCTCCGGTAGGGTTCGGGCCTTCCGGATGCGGC
CCR240	chr1:52553474-52553514[+]	GACTCATCTCCCAGCACAAATGGGCATTCTATGAAATGGTA
CCR241	chr1:92790190-92790230[+]	GGGACAAAGTTTTCCCTAATTCTTCATACAATAAATGAAGC
CCR242	chr16:75690615-75690655[+]	TTTCTGACCATCGCTGCTGTTGCTCTGTGAGTCCTAGATTT
CCR243	chr19:57803026-57803066[+]	TTCACTCACTATTCCACCTATGTCCTGCATGAAAGAGCCCA
CCR244	chr12:123810741-123810781[-]	AGAGGTTCTTCAAATACTTATGCATAGCATCCAAAGTTAAA
CCR245	chr12:69235383-69235423[+]	CCTAAGTTGAAAAACAACTCTAAGACACTTTAAAGTACCTT
CCR246	chr6:44387297-44387337[+]	GTACAGACTCCAAACACAGTTCTCTCTACTCCATTCAGGTA
CCR247	chr5:139623097-139623137[+]	TTGCACAGACACCTCTACCTTCAGCACTATGGGATTCTAGA
CCR248	chr1:155744993-155745033[-]	GATTCTGAAGGCTACTGGTATTAATTGTCTGGAATTGTCTT
CCR249	chr3:98510749-98510789[+]	TTCACCTAGCTGGTTTTAAATACAACTTTTCTGACCTCAAG
CCR250	chr7:64169723-64169763[+]	ATATAAGACAGTTTATACTTTGAGAGAAACCCTGCAAATGT
CCR251	chr6:159205718-159205758[-]	GTGATGGACCAGCACAAACTTACCAGGGACCAGTGGGAGGA
CCR252	chr22:41173292-41173332[-]	GGAATGGCACATTTCCCTCATTGCTGTTGGTCTTCAATCCT
CCR253	chr15:101716298-101716338[-]	AGTAAACCGATCTCCAAAGATTTCCTTTTGGAAACGCTTTT
CCR254	chr14:75514120-75514160[-]	AATTGGTTTCTCCAAACCAATCGTCCGTAAGAAGCTAAGCT
CCR255	chr5:92929464-92929504[+]	AACCCCCATCGAAACTCTCATCCGCGATATGTTACTGTCTG
CCR256	chr17:34893964-34894004[+]	AGTAGCCTGTTTTCTTTTACTGGCAGCTATTAGCCTCTTCA
CCR257	chr13:107195965-107196005[-]	CTCTGTTTGCTACATCATAATGCTGGTTTTGCTGACTTTTT
CCR258	chr7:107543934-107543974[+]	CAACTCTCATTATTACCATATGGCCCATGGAAAAGATTTTG
CCR259	chr1:7828659-7828699[+]	TGTTTTTTAATTACTTCCTTTCACTGCCAACCTCGAATTAC
CCR260	chr3:194999992-195000032[-]	GAAATCTGGTGACCCCCTAATGTATACAGCTAAAAAATCAC
CCR261	chr4:48384866-48384906[+]	ATTAGCCGCTTACAGCAACCTCGCCTTTCACTTCAAGGCCA
CCR262	chr2:196548484-196548524[+]	CTGATTTATTTACATACCTTTGCCCTGCATTGTTATATCAA
CCR263	chr5:154185540-154185580[+]	AAATGGCTTCACACAACACGTCTACCATAAGTATCGTAGGC
CCR264	chr1:91985796-91985836[+]	TAGGGGATCCAGAGAAACTATCCAAGCTGCTAAAACTTTTG
CCR265	chr19:39868436-39868476[+]	CAGCCAGTTTACACGGGTGATGGGCAAAGGTGAGACCAGCC
CCR266	chr15:32929890-32929930[+]	ACCAGTTGTAAATAACAACATGGGCATTTCTTCTGGGATAA
CCR267	chr6:46128629-46128669[-]	TTGATTGAAAATGACAACTTTTTGCACCCATGTCACAGAAT
CCR268	chr6:28641659-28641699[-]	AACCGACTTGTGCCAGGGGATGTAGCTCAGTGGTAGAGCGC
CCR269	chr2:174820834-174820874[-]	AGCTGGTAATCTAGTCCAGATTCCAAGTGCTGCTACTTCAA
CCR270	chr5:134191224-134191264[+]	TATTTTGATATACATAATTTTATGGCCTGGGCTTTCCAAAT
CCR271	chr8:21839355-21839395[+]	ATTGATAGCCAACTTCACAGTGACCAGCCTACAGGTTTGTC
CCR272	chr7:32907821-32907861[-]	TAGCATGTTCAACTGCACCATGTTCTGGCACTGTATTTTGA
CCR273	chr12:88462348-88462388[-]	GAAGATTTACATTTACAAAATAGATACCTCCAAGAAAAACT
CCR274	chr3:149238706-149238746[-]	TCAATCCCCAACAGACCCGTTTCCCTGATTTCCTTGACTGT
CCR275	chr5:171337601-171337641[-]	AGCATGGACATATTAACTCTTACCTGAAGCCCATGTTGCAG
CCR276	chr10:121334751-121334791[-]	GTGAAAACCTGGGAATCACATATAAGTTCATCCTGAATCCT
CCR277	chr3:15298494-15298534[-]	TCAGGACCAACAAGCCCGTCTGAGATGCCTGACCAGTTCCC
CCR278	chr10:18719721-18719761[+]	GTTGAGGGAAAGGTGAAAAGTACATATTACTTGATTACTAT
CCR279	chr4:77036103-77036143[-]	TTGCACATAACAGAACAAACTATAATTACTTGGCTGTTGGA
CCR280	chr2:176984244-176984284[+]	TATTATTGCGCATTTTCATTTGGGTCTTAACTTATTGGAAC
CCR281	chr12:133311108-133311148[-]	GAGCTGGGGTATCCCTGGGTTGAATACTGGGAATTTCTGGG
CCR282	chr22:50356559-50356599[+]	GCCCTCCCTGACCTCTCCGCTCCGCACAGAGTGCCAGCAGC
CCR283	chr2:64686139-64686179[+]	GAACAGCAAGTTGTAAACTTTTGAATGTATAAATATCTTAG
CCR284	chr3:52088046-52088086[-]	CCTCAATGTCACACCCAACCTACCCAACGCCTTCGAGCACG
CCR285	chr1:21502180-21502220[-]	TTAGTACATAATAAACTTTATCGGTAAATTTCTTGTTTGAA
CCR286	chr15:42758248-42758288[-]	ATGTTGCATCACAGGGAACTTGAGAACCTCAAGGGCAGGTA
CCR287	chr1:226109772-226109812[-]	TGGCCACTCATTCGGCTCTCTCCCTCACCCTAGAAGCTGAT
CCR288	chr6:160105907-160105947[-]	GGAACGGGGACACTTACAAATTGCTGCTTGTCCAAATCAGG
CCR289	chr13:49055069-49055109[+]	CTAACACAGTATATCCCAAGTGCACTTTCTAATGTTTCTGG
CCR290	chr10:11504078-11504118[-]	GCTCATTCTATTTTGACTAATGTTACAAAGTACTGAAAAAA
CCR291	chr11:1330969-1331009[+]	TCGCCCGGCGCCTGCGCACCTGCTCTCTCCTCGAGCCCTGC
CCR292	chr15:100246955-100246995[+]	TCTCAAGCCACTCAACCTCTTGCTACCCCAGTCGTGTCTGT
CCR293	chr6:18258186-18258226[-]	ACTTAGAAATCTACACAAACTGCTTTACAACAGGCCAGGCA
CCR294	chr13:45911496-45911536[-]	TTTGCTTTTACAGTAACAAATGTGGCAATTATTTTGGATCT
CCR295	chr11:63961965-63962005[+]	AACCCTTTCAACATGCCTAATCTGTATCAGAAGTTGGAGAG
CCR296	chr17:8076534-8076574[-]	AGGCAGTGAAATAATACAAATGGGCTCTTTGTTTTTTGTCG
CCR297	chr1:243319652-243319692[-]	AACCGTAATTCCCCTAAACATACCCGTCTACGTACTTCTCC
CCR298	chr6:160176350-160176390[+]	GAAGATGACTTTCCTTCTTCTCCAGGGAATGGTAATAAGTC
CCR299	chr6:33665395-33665435[-]	GCCTGAGCTCAGGCCTTACCTCGTGCACATACCTAGGTGTG
CCR300	chr4:26431595-26431635[+]	AAGGCAGAGTATACATTTTATGAGGGAATGGGCCCTGTCCT
CCR301	chr18:44702610-44702650[-]	CCATGGCCTTTACCCTGTACTCACTGCTGCAGGCAGCCCTG
CCR302	chr18:9518746-9518786[+]	GAGTTGTTAAGTCATACACATGTGGAATATATAGAGAGATA
CCR303	chr6:116599918-116599958[-]	GGCCGAGTGGTGTCTCTTTCTACTCCAATTATATGGCGCAG
CCR304	chr2:196601936-196601976[+]	GTCTTAATAGACAATCTGAATTCCACTACATTTCTTTTGGC
CCR305	chr1:19401238-19401278[-]	CACCCTCTGTTCTCCCTCCTTGTGCATTAAGTTCCCTCCGC
CCR306	chrX:135127744-135127784[+]	AGTTTAAATAAGAAATTTAATTGCTGCTTAATTTTTGATTA
CCR307	chr7:103002424-103002464[+]	CTGATTCGGAGGACCCAAAATACATTATCAACGTAAAGCAG
CCR308	chr9:100417175-100417215[+]	CTGAAATGCTATACATGCGTTTGGACACAATGAACACTACC
CCR309	chr8:117875399-117875439[-]	CAGGAAAGCCAAATACCTTCTTGCAGACTGTAATGAAGCAT
CCR310	chr12:104728075-104728115[+]	TGTTATGCAAAAATAATCTGTAATACTAAAGACAATGTAAG
CCR311	chrX:153216317-153216357[-]	TGCCTGTGGCCGGGGGCCCTTCAGCGAAATCTCAGCCTTTA
CCR312	chr21:34922484-34922524[+]	TGTACCCTGAGCCAAGCACATCAACAACAATGGATTTTCCA
CCR313	chr6:31609112-31609152[-]	GGAATTTCTCCAAGAGCAGTTTAATAGCATTGCTGCGCATG
CCR314	chr10:98741673-98741713[+]	AATCAAAAATCAATATTATCTTCTCGGAAAACAGCCAGAAA
CCR315	chr13:53009432-53009472[-]	TGTCTCTGAGAATTCTGGGCTTGCTGCAAATGACTGAACAG
CCR316	chr12:95434266-95434306[-]	TGCTGTTCTTATCAATGCACTGGGCACTTTCGATTCCTTCT
CCR317	chr5:89813168-89813208[-]	TATAATACCACCTCATTTTCTGGGCATTATTTCCTAATTGT
CCR318	chr10:70723076-70723116[+]	CAAGCAAAGACATTCCATCATGTTTACAGCGGGAAGGACTT
CCR319	chr18:51933289-51933329[-]	TCAATAGAACAATATTGGAATGGTGGTAATACGAGGAAATA
CCR320	chr8:48875569-48875609[+]	ATTTGTACAGACAACTCATCTCTTACCCACAGGTAAGAATT
CCR321	chr1:207953284-207953324[+]	GTACTATATGTTTTAATAACTGCCGGGAACACTTCCTTTTC
CCR322	chr1:156280775-156280815[-]	GCCCTAGAGGTCATTCCTCGTACCCTGATCCAGAACTGTGG
CCR323	chr2:44036959-44036999[+]	TTATACTGTGAATTAACTATTGTGGCAATATGTGAAGAAAG
CCR324	chr9:128000420-128000460[-]	TTCTGATAATCAACCAACTGTTACAATCAAGGTCTATGAAG
CCR325	chr1:62907893-62907933[+]	TCTGGAGTAAAGCACTTATTTAATATTATTTCAAGGAAGAA
CCR326	chr1:193051709-193051749[+]	TGATTGCTCTCTTCCAATGATCTGGGCTCAGAAGACAAACA
CCR327	chr2:131906764-131906804[+]	GCTCAGGTATTTTATTTCCTTGGCCACAACTCCCATAGATG
CCR328	chr17:66250648-66250688[+]	AATTTTCGACAACTATTATATTCCAGAAATAACTAGTGTTT
CCR329	chr12:69968184-69968224[+]	ACATCCACCAGTACCTCAGATACCCAGAATATCAACAACTC
CCR330	chr2:12882049-12882089[+]	TAAATAAAAACAGCTCTCTATCCCAATACGCACCTTTGTAT
CCR331	chr6:74019811-74019851[-]	GCGGCGGGATGCTGCTCCGTTCTCCGGGTCCTCTCCTCCGG
CCR332	chr9:35057413-35057453[-]	TTCTGTCAGTGACAATGACATTCGGAAGTATGAGATGTTTG
CCR333	chr19:4932803-4932843[+]	GCGCCCGCACCATCATCAAGTGGCAGGACCTGGAGGTGGGC
CCR334	chr15:29561244-29561284[-]	CCACCAAGAAGCATTTAATTTTCGGAGATCCAAAGAAACTC
CCR335	chr10:99080152-99080192[+]	AAGCGAGAGTAAAAAGCTAATGACGAGGAACCGAAAAATCG
CCR336	chr6:18249945-18249985[-]	CCAAATGTCCTGAAATTCTGTCAGATGAATCTAGTAGTGAT
CCR337	chr20:47708608-47708648[+]	TTGCATAAAATATGGGGCACTAGCACTACAAGAAATATTTG
CCR338	chr2:20648654-20648694[+]	TAAAATTTGTTTTTTTATTCTTTGCACAATTGTTTCATTGT
CCR339	chr1:41088137-41088177[-]	TGACATGTAAAGAGATTCTTTAAAATGCTGCTTCTTCTACT
CCR340	chr10:126086117-126086157[-]	GAAAAAGTTATCTCTGGGTATTGCATAAAAGGCTTCATCTT
CCR341	chr19:12739111-12739151[+]	CACAAGTGTTCTAACACACATGATAACACACAACGGAGATA
CCR342	chr5:175751690-175751730[+]	ACCTGCAGCTCCAATAAAATTGCCGAGATGATGTTTGGGTT
CCR343	chr13:42897342-42897382[+]	TAAGCCTGTGATCTTTCTTCTCCCAGCTAAGAGTTCTTCAA
CCR344	chr19:4254367-4254407[+]	ACAGACTACACCATGGAGCATGGAGCCACGCGGAATTTCCA
CCR345	chr1:113212783-113212823[+]	GGAAAGACAAGGATTCAACGTGTGGTCATATGATAAATAAG
CCR346	chr7:152511685-152511725[+]	TATGTTTGAATCATTTAACGTACCAGGACTCTACATTGCAG
CCR347	chr11:118620522-118620562[-]	TACTAAATAGAAAACCTAATTAAGGAAGTAACTTTTTTCCA
CCR348	chr3:41274900-41274940[+]	ACTCTCAGGAATCTTTCAGATGCTGCAACTAAACAGGTAAA
CCR349	chr7:151943376-151943416[-]	CTTGTTACTACTTCATCATTTGCTGCTACTCTTGTAAGTAT
CCR350	chr1:224321785-224321825[+]	AGAAAGGAGAAACCATTCATTAGCTCGTCATGCAGACATTC
CCR351	chr12:13061801-13061841[+]	GAAGAGACATGGGGCCCACATCTACCTCACGATGCTCCTCT
CCR352	chrM:6618-6658[+]	CGGTCACCCTGAAGTTTATATTCTTATCCTACCAGGCTTCG
CCR353	chr19:57734078-57734118[+]	ACAATTTGTCATCCTTTTGTTGCTGCTTTTGAAACTAGTTC
CCR354	chr2:64863104-64863144[-]	AGTCAGCCTGTCACCCCAAGTCAGCCTTTCAAAATGGACCT
CCR355	chr10:127422274-127422314[+]	AAATCCATTCACAATGCCGGTAGCCATTCTCTTGTACAAGT
CCR356	chr10:99217069-99217109[+]	GCCACTTCTCACATGCTGCTTAAGGGAGCACAAATAAAGGT
CCR357	chr6:44214892-44214932[+]	CTACGTTGCTCACTATTACGTATAATCCTTTTCTTTTCAAG
CCR358	chr9:26925885-26925925[-]	GAATCTGGAAACATGGGGAATGTGCTCAAACTATCCGACTT
CCR359	chr12:51634695-51634735[+]	TCCCCACCATGTCAGCCGCATTTCCTGGAGCCTCTCTGTAT
CCR360	chr1:151377869-151377909[-]	ATGACGAGATCATGGAGCTGTGGTCAACTCGAGTGTGGCAG
CCR361	chr5:98191802-98191842[-]	AAATGGAAAATGTTTACTATTACAGGGACCTCAACACTGCC
CCR362	chr1:162493339-162493379[+]	AGTTTTAAGGTTTCTCAAGATGTGGCTCTACCTACTATGAT
CCR363	chr4:151186559-151186599[-]	TGGAGCAAGTAAACCACTTATTCCAGCTATAATATTATGAA
CCR364	chr18:9401432-9401472[+]	ACAAATATTTTAAAACTGCATTTATCATTTTTTAGGTCTTC
CCR365	chr19:36831391-36831431[-]	TTTAGACTGCTCTCACAACTTACTCAGCATCAAAGTATTCA
CCR366	chr10:93273857-93273897[+]	TTAATGTAGGTTACCACTTATAAGCACAAAAGAAACATGTA
CCR367	chrX:84519313-84519353[+]	GGGAATACACCATTAAAAATTGGCAGTGATGGTTCACAAGA
CCR368	chr1:78482860-78482900[+]	TAGGGAAAATAAACACTAACTGCTGCTTATGGATAATGTTG
CCR369	chr8:104344567-104344607[+]	TAATGTTTCATGACCACCCATTGATTGTATTATAACCACTT
CCR370	chr3:101477149-101477189[+]	GCCTGTTGGCGGGGATTTTATGCCAGGAACTACAACCCTCA
CCR371	chr13:79918829-79918869[-]	GCACAGAAAACCTTACTTGTTTCCACCTCTGCAGTTGATAA
CCR372	chr3:47386253-47386293[+]	GGGCGGTATCCACCCCACATTCGGATCCCAGGGTCCTGAGG
CCR373	chr6:13641460-13641500[-]	CCATTGAAACAACACAACAGTTATACCCAAGTTTACTTGAA
CCR374	chr1:65047644-65047684[+]	CCTTCTATGACTTCTGGGCATTGTGCAATTTTTATCTCAAC
CCR375	chr10:27046338-27046378[-]	CATTTAATTTACTCTGCAAATAGGATTTTTGTGACTTTTTT
CCR376	chr11:33362573-33362613[+]	CAAATAATCACAACAAAACTTCACTTTTAAGACCAGTTGCT
CCR377	chr7:89854678-89854718[+]	CAGAGAACATTATACCTCCCTGTGGGACCTGAGACATCTGC
CCR378	chr1:35656461-35656501[-]	TGCCCTTTCTGTTCGTAATCTTTCACCTTATGTTTCCAATG
CCR379	chr12:49086873-49086913[-]	CTGGTGGAATCTCCTCGAGATCTGGCAATACAGACAAACCC
CCR380	chr15:83710647-83710687[-]	TTGCCTATAGATACACTCTGTGCAGTTTTAGAGAGAGACAC
CCR381	chr6:158899745-158899785[+]	GATCGGAATGAACAAATCTCTTGCTGCTTCTCCGTCACGAC
CCR382	chr17:47696434-47696474[-]	CCAGAGAGTCAACGGGCATATAGGTTTGTGCAAGGCAAAGA
CCR383	chr17:73060096-73060136[+]	TTCTGTGACTCTCTTGGAAATGCCTTGACTGAATGTGCAAT
CCR384	chr1:155234260-155234300[-]	TGCATCATCTTTGAATACTATGTGGGATTCACCCTCTTCCA
CCR385	chr20:47905733-47905773[+]	TTGTTAGACTTTGAAATTTCTAACTGCCTACCTGCATAAAG
CCR386	chr19:44112204-44112244[-]	CTGATTCAGAATACACTCTCTCAGAGCCGGACTCCGAAGAG
CCR387	chr12:65632474-65632514[+]	GAATTGACAAATATAACTGATGTGCAGTTTTTACAGTCCAC
CCR388	chr3:98234353-98234393[-]	AACTTCATAATTTCTTACCATAACCTCAATGTCTTTTTTAA
CCR389	chr22:30736248-30736288[-]	AATGCAGGAACACATGCGCATTGGACTTCTTGACCCTCGCT
CCR390	chr6:88234298-88234338[-]	ATGGCGACCCCTCCTCAATTTGTACTGTAATGCGAAGTGAT
CCR391	chr19:30192953-30192993[-]	GCCCTGCCAGGGCCTCGCTCTTCCCATCTGAAAAGTCCTGG
CCR392	chr4:71840899-71840939[+]	ACATAAAGAAACCTATTAAGTGCTCTGCACCAAAGTATATT
CCR393	chr5:179044867-179044907[-]	TCTGATCACAGATACGGGGATGGTGGCTCTACTTTCCAGAG
CCR394	chr17:59946960-59947000[-]	CACAAATGATCCATGGGCTTTTGCAATATGGAGAAAAATCC
CCR395	chr7:135304571-135304611[+]	ATGGCTCTCTGCTTTATTACTTACAGATTGCCCAGAGACCT
CCR396	chr17:74559690-74559730[+]	TCCAGGAACAGATCTTTGCATAGAATATCAGTGGTTTCCTT
CCR397	chr1:114455953-114455993[+]	GAAGAAGATTCCATTTCTTGTCCAGGGGATTTAAAAGAGTT
CCR398	chr6:149983273-149983313[-]	CTGATCTTATTATTAAACTTTGCCGAGGACCCGAAGATCGC
CCR399	chr3:82856092-82856132[-]	AATCTGCCTCCTTTAACTTATGACCAGCTCAAGGATCTAAA
CCR400	chr16:66756430-66756470[-]	CATTTCTCTTGTTAGGTGTTTTCATAAAATGTAGCATTTTT
CCR401	chr4:108831581-108831621[+]	AATGTACAAGGCTCAATTCCTTGCTGCTTCTCCTGGCCGCT
CCR402	chr2:198285148-198285188[-]	ATAATTTCCCCAGAGCGTCTTGATCCTTTTGCAGATGGTAA
CCR403	chr5:134002648-134002688[+]	TACCCCAGCCCTTATTTAATTCAGCTGTCAACCAAGAAGGT
CCR404	chr3:186507155-186507195[+]	GTCTCAATGCTCATAACGGATCAGAAATACAGATTTTGATA
CCR405	chr13:41704147-41704187[-]	CCTAAGGGGTCTTTACAAAATGTGTTATAAGTTAAACATAA
CCR406	chr6:101165991-101166031[-]	ATTGGACTTTTCTTCTTTGATGGCCGTTTTCGACCAGTACC
CCR407	chr6:56966727-56966767[+]	AAAGATCACAAATACTATAATCAGCATCGATACTTTTATAG
CCR408	chr9:8713462-8713502[+]	TAAAGAAAATGAAGAAGTCTTCAGGGGAGACTGTCTACTGT
CCR409	chr2:96919525-96919565[-]	CCCCTGCTTACACACCCTAATGCCAGCCCTGGGCTCTCTTC
CCR410	chr15:96881918-96881958[+]	TTAAGTGCAACATTTCTGTATACTGTAAAAGTTATAATAAC
CCR411	chr19:56889238-56889278[+]	CTGGTGAAAAACCCTTTCAGTGCAGTCAATGCGGGAAGTCC
CCR412	chr5:98130953-98130993[+]	CTGCTTTAATAATTTGTTGATAAGTTTACATAAACAGAAAT
CCR413	chr16:2549884-2549924[+]	GGAGGCAAACTGGGCTTCTTTGGGACCGGAGAATGCTTTGT
CCR414	chr15:60782401-60782441[-]	ATTCCTAGACAATACCACCTTTGGGTCTTGTTAATTTCACT
CCR415	chr20:508589-508629[-]	AAAATCTCCAAGAAACATCATTCACCCATACTGACTAGTTT
CCR416	chr9:138903250-138903290[-]	TGATCAAGCCACTTACCTACTGAACTGCTACTGTTGCCTGA
CCR417	chr5:77783312-77783352[-]	CATGATACAGAAACACTCCTTAGCACTTTAAGAAAGTGAGA
CCR418	chrX:47428153-47428193[+]	CTTCATGACCCGGCCGGGATTTGCCATCATCACACAGTGGT
CCR419	chr1:227174246-227174286[+]	CGAGAAGATCCACAACCTGATTCCCGTCATGCTGAGGCACC
CCR420	chr5:56216350-56216390[-]	AAGCAAGAAAACAACCGGATTTGCAATCATGTGAAGAAACA
CCR421	chr1:16200309-16200349[+]	TATAGCCATTCTTTTCTAATTGCTGGGATATATGGGATGTC
CCR422	chr11:22646854-22646894[-]	CCAAATCTCCAGGAGGACTCTCTGATGAAGACCCAGGCGGA
CCR423	chr5:133726723-133726763[+]	CAGTTTCTTCATGCATTACTTACTGTTAAAACTGTACCTTT
CCR424	chr17:1340195-1340235[-]	CTTTAAGAAAGGAGACATCTTGAGAATCCGGGACAAGCCTG
CCR425	chr1:89237453-89237493[+]	TATTGAAGAACTTTCACTTGTTGCTGCATCACCAACACTAA
CCR426	chrX:57935804-57935844[-]	TGGCAAGAGCTTCACCACCGTGTACAACCTCAAGGCGCACA
CCR427	chr2:10924093-10924133[-]	CTTGGCTGTCGAAACATTTTTCTCTCTGACTGCTGCTTGAA
CCR428	chr19:56185373-56185413[+]	ACAGAGTGGTTGTCACAAAATACTGTGACCCCGACTCTTAT
CCR429	chr6:17625921-17625961[-]	TATAGCAGGTTATCACAAAATGGTGGGAATGCCTTTTGGTC
CCR430	chr5:64019161-64019201[-]	CGTTTTCATAAATGACCAGTTTGGGATGTTTCTCTCTTTTA
CCR431	chrX:133905121-133905161[-]	ATTGCCACATACTGTTTCTGTTGCTGCTTTTTTTCCGATTC
CCR432	chr6:166362768-166362808[-]	AGAGTCGAAGAACCAGGGAATCGTTGTAATAACAAGCATTC
CCR433	chr6:87971781-87971821[+]	TTTCATGAACTAAACAATTATCTGTGTGATTGGTATGTTTC
CCR434	chr19:44778153-44778193[+]	CTGGAGAGAAACCATATAAATGTGAGGTATGTGATAAGGGC
CCR435	chr2:201845468-201845508[-]	ACTTTGGACTTCTCTGAGTCTGTGCAATCATTTTCTGGAGA
CCR436	chr9:115423907-115423947[+]	ACCAGAGAAGACTCAACCAATGCTGCCTTAAGATTTAATGT
CCR437	chr1:171562188-171562228[+]	AAGCTAATTTTAAAAAACGGTGCCAGGTACCACAACAGTAA
CCR438	chr8:145739329-145739369[-]	AGCCCCAGTTCCCACCAACCTGCACCTTTCCGTGTCCATGG
CCR439	chr6:87968291-87968331[+]	AACAAGTGACTTAACAACAATGGGACTCATAGCAAAGAGTG
CCR440	chr5:135496640-135496680[+]	ATGCCACAAAATGCCACGTTTCCAGATTCTTTCCACCAGCC
CCR441	chr5:138700345-138700385[+]	TCGAGATCTCCCACAAACTATGGACCAAATCCAAGACCAGT
CCR442	chr2:178482333-178482373[-]	TTCCTCACACCCTATCTCTATGACTTCTTAGATGCCCTGAT
CCR443	chrX:70832899-70832939[+]	GGGGATGTGATGAAAACACTTGGCAGGAATTACAAGGCAAT
CCR444	chr4:106390824-106390864[-]	TTAAACGTTTTCTATATCAGTGCTGTGAAATAGGAATTGTG
CCR445	chr2:24291252-24291292[-]	GTCTATGAGGACATCTTTGATGCCAAGAATGCATGTGATCA
CCR446	chr19:13063844-13063884[+]	AGAACTTTGATGACGAGTGATGCCAGGAAGCCAGGCCACCG
CCR447	chr14:23398453-23398493[-]	AGCTGACACACTAGGGGCTGTGGCCAAGCAGGGGTGAGGGC
CCR448	chr13:34404894-34404934[+]	TCTGAATCTTCCTTCACAACTGGCTCATAGACTTGCAGAGA
CCR449	chr19:3660972-3661012[-]	CTTCCGCTACTTCCGGGAGCTCTTTGGGATCCGGCCAGATG
CCR450	chr6:11138673-11138713[+]	CATAACCATTCACCAAATACTGCTGCTGTGATTCCTTGAAG
CCR451	chr19:12739967-12740007[+]	CATACAAGAATTCACAATTATGAGAAACCTCTTGAATGTAA
CCR452	chr12:68055729-68055769[+]	GGCCAGGGATTTTTACAATTTGGGTGCAAGGCACTTAAGCC
CCR453	chr22:33255420-33255460[+]	CACTAACTCTTCCCAGATGATGACAATGAAATTAGTGCCTG
CCR454	chr11:65337971-65338011[+]	GAACGGAGCTGGTGAGGACCTGGGCGGCAGGGGTTTGTGGC
CCR455	chr6:114265526-114265566[-]	TGTTTGAAAATTTGCGCATGTTACCTCATGCACCTGGTGTC
CCR456	chr19:4472323-4472363[+]	GCGGCCTGGGCCTCTCGCCGTCAGCATGCCACACGCCTTCA
CCR457	chr14:99640256-99640296[-]	AAATTGTGGAGCCTTTTAACTGTGCAATAATTTCTGTATTT
CCR458	chr1:161135461-161135501[+]	CCCCCAGACCCTCTGCAATATCACTTTTTGTGAATAAATTT
CCR459	chr1:109756674-109756714[+]	AGAGACGCAGGAGAAGCGCTTCAAGGACCCGGGACTAGTGG
CCR460	chr20:30381727-30381767[+]	AGGCAAGAACTGTGGAAATATGCCCTTTCTCGTTTGATTCT
CCR461	chr12:50493944-50493984[+]	GGAGAGCCTCACATTCTTCTTCCAGGTTGTATCACCCCCGA
CCR462	chr4:140432522-140432562[-]	TTTGGTGGTTCAAGTCTAAATCTGTACCACATTCGGAGATG
CCR463	chr5:175915972-175916012[+]	TTACTTGATAATGCTTCCATTCCGGTTTACCTATTACACGA
CCR464	chr5:37330186-37330226[-]	GGCTTGTGCAACTTGCCTTATTCTTGCTTGCTCCACTGCTG
CCR465	chr4:76692246-76692286[+]	TTGATGGACTTACTAGCGGATTCCAGGGAAGTTATACGTAA
CCR466	chr21:35279713-35279753[-]	GCTTGCTGAAAATGGTCGATTAAGCAATACCCAAGGAGTCG
CCR467	chr6:119345227-119345267[-]	TTTCAGGGACAAGAAGCAATTTTACGAAAAACTATAGGAAA
CCR468	chr13:24879081-24879121[+]	TGGAAACTACTTAATATGCTTTTCCTGCACACCTTAGCAAT
CCR469	chr16:31102510-31102550[-]	ATTGTTTGTATCACCACCTATGCTATCAACGTGAGCCTGAT
CCR470	chr1:157095675-157095715[-]	CCACCTCTGGACACCCATTCTCCAACCAATGATGTGCAGCC
CCR471	chr5:133536693-133536733[-]	TATAGATACACTGGATCATATCAGAGCACTTGATCGCCTAC
CCR472	chr19:38126462-38126502[-]	CGACTACATCACAAACTTCATACTGGAGAAAAACCCTATGA
CCR473	chr5:139623261-139623301[+]	TATAATTTTTAAATTATACATTCAAGGTAGTGGCCAAATGT
CCR474	chr2:99935784-99935824[-]	ATTCCAGGACTAATTCTTAATCGGCATTATTTATACAAGAG
CCR475	chr1:234741504-234741544[-]	ATTTTTTTAAAACCAATAAATCATCAATTATTAGAAATAGT
CCR476	chr5:90665108-90665148[-]	TATTTGGCATAAAGGGCATTTGGTGGTTTTATTTTTGTTTG
CCR477	chr10:98742747-98742787[+]	GAAATCAAAGTTCCTAAAAATCCTAGTGCAAAACGTTCAAA
CCR478	chr13:100615374-100615414[-]	CCATGCATAGGTTAACTCTTTGCCACAGATTTATTGGTTCT
CCR479	chr6:56966376-56966416[+]	GCTGCTAGCTACATGGCCTATATGACTCAATATCAGCGTAA
CCR480	chr18:19209941-19209981[+]	TAAAAAGTTGTCTTCTAAATTAAGGGTCATTGCTTTGTTGT
CCR481	chr8:131064691-131064731[-]	CAGTAAGCCACTATCTGCAATTTTGTACATTATATAGTATT
CCR482	chr6:119230009-119230049[+]	CATATCTAAAACTTTTATACTGCACTTTTTAAAGCTTTTAT
CCR483	chr19:38698724-38698764[+]	ATTTTGGGGACTTAATCATGTACATGGACAAGTGTAAATTA
CCR484	chr15:101812628-101812668[-]	TCTTTTGAGGTTAGAAATCCTTGCTGCTAGGACAGTCTCTG
CCR485	chr1:2238841-2238881[+]	GCCAGCGCTGTCCCCACGGGTACCAGGAAGTGCAGAGCCGC
CCR486	chr4:17825305-17825345[+]	TTTTACCCACAATCCCAATATCCCTGGTTTCTTTTCTTGTT
CCR487	chr20:34257178-34257218[-]	TCTTTGGTCAGGGACCATGATGCTCTACATGGACATTTGAG
CCR488	chr19:41928192-41928232[+]	AGTGCCCCATCATCTTCTTCTGCCGGAACAATGGCTACGCC
CCR489	chr2:27327180-27327220[-]	GATGACAGTGTTAATCCTGCTGCTGCTCCCCACGGGTCAGG
CCR490	chr8:77776424-77776464[+]	CACTCAGTCTGCTCCCCTAATCCTAACACCACATCTACCTC
CCR491	chr11:32615421-32615461[+]	TTCAAAAGTCATGGTGGAATTGCTCGGAAGTTACACAGAGG
CCR492	chr5:56219530-56219570[-]	TCCTGATCAACAGCTAAACATTCTCAACTCCTTCACTGCCA
CCR493	chr15:51740543-51740583[-]	ATGCAATGTTTTACTCACAATTTGCACATTCACATTTTTTG
CCR494	chr15:45007786-45007826[+]	AGGACTGGTCTTTCTATCTCTTGTACTACACTGAATTCACC
CCR495	chrX:70794529-70794569[+]	TTACCCTTGACTGCCCCTTCTATGCTGCTTCCAAAAGTGAT
CCR496	chr5:110464775-110464815[+]	TTATTTTGGTACATTCACATTTACCTAATCTCTTGTGCACT
CCR497	chr6:7590446-7590486[+]	CGGTCTGCAGTTCGGCCGCTTCCTCTTGGCGGGTGGGCTGC
CCR498	chr9:2654116-2654156[+]	TTGCCACCTCTGGCCAAATATGCACTTTCCCTAGAAAGCCA
CCR499	chr11:19245874-19245914[-]	TAGCTATGCCTATACTATTATGCAAAGTAACTGTATTAAAG
CCR500	chr8:37557167-37557207[+]	CCTTGTTTTTCTCTCCCTCGTGGGGGCAACGACCCCTCCCC
CCR501	chr2:201943626-201943666[+]	TGAGCATGGACATCATAAAATGGAACTTCCAGATTATAGAC
CCR502	chr20:62632543-62632583[+]	CGCAGAGCTGGAAACGGACATTCGTGCAAAGAAGCGGGTTC
CCR503	chr3:50388878-50388918[+]	CGGAGACCGAGTCACACATCTACCGAGCTCTGCGTACTGCT
CCR504	chr19:13033657-13033697[-]	AACGATGATCAAATATGGCATCAACAATATCCGGGAGCTGG
CCR505	chr22:39918312-39918352[+]	GGTCTGCCCGTCCCAAACCTTACGATCCTCCTGGAGAGAAG
CCR506	chr10:112053943-112053983[-]	TGGAATTGCTGATAAACCTATGACACAATATCAAGATACCT
CCR507	chr4:174252575-174252615[-]	TTAAGTTTTGTACTTGACGTTTCTGTTTATTAGCTAAATTG
CCR508	chr14:61909843-61909883[+]	GACCGGATCTTCAAACATTTTACCAGGAAGCGCCAAAGGGC
CCR509	chr10:23729994-23730034[+]	GAGGTTGCTGGGCACCTAAATGATGTTTCATGATAGCTTTG
CCR510	chr6:7251060-7251100[+]	TATATGATTTTTAACTGTATTAGGGGTGTATGAACCAGTTT
CCR511	chr5:139948605-139948645[+]	TCAGTGTCTCTTTAACTGCATAAGCAATAAGATCTTAATAA
CCR512	chr20:44574949-44574989[+]	CTCACCCCTCAACTGCTACTTCCGCCAGTACTGTTCTGCCT
CCR513	chr14:50363079-50363119[+]	TAAATATGGGTTATCCAATATCAATGCTATAGTAACATCCT
CCR514	chr17:48559788-48559828[+]	CAGTATGAGGTCTCCAACTTTGCCCGGAATGTAAGTTCTGG
CCR515	chr1:154246299-154246339[+]	ACAGACACTTCGGGACTCAATGCTTAAGTATCCAGATAGTC
CCR516	chr9:33029912-33029952[+]	ACCCTAGAAGACTTATATAATGGTGCAACAAGAAAACTGGC
CCR517	chr16:18794245-18794285[-]	GTGCTTCCACTTGGTCGTTTTGAGCCTTTACAGCAGTGTAG
CCR518	chr16:81064812-81064852[+]	ACCTTTGAATTGGGCCAAATTGCGATGACCACTGCATCCTG
CCR519	chr5:56545257-56545297[+]	TCTCCTGTTGACAAACTTAATCAGCAGCCTCGTCTAACCAA
CCR520	chr16:70566424-70566464[+]	CAGCAGACACTTACTTTCTATGAGCTAGACCTTGGTTTAAA
CCR521	chr6:117055566-117055606[+]	GTGAAAGGAAACTTAAATTTTGCCGGTAAAACAAACATATC
CCR522	chr22:38228697-38228737[-]	GAGGGAGTATCTGGAGCGCCTAGGGCAACATGAGCAGCGAG
CCR523	chr17:47366668-47366708[-]	CATTGTATATTTTATTCTTGTGAGACTCTGGTACAGGTGTG
CCR524	chr5:147788752-147788792[+]	GGTTACCTCATCATTACTGCTGCCCGTAGGTATGTTTCCTC
CCR525	chr19:58132294-58132334[+]	TAGCCATCACTCCAATCTAATTGTACACCAGAGAGTTCACA
CCR526	chr11:34107863-34107903[+]	GGATTTTGAAAATCAGACACTTGATCCTGCCATTGTATCTG
CCR527	chr8:37717803-37717843[-]	TTTGTCCTGCATTATGTTTTTTACTTGATATAAATGTATTT
CCR528	chr21:43159651-43159691[-]	GTGGGCAGGATACTTTTCCATGGCAGGAAATATCCAAGCTG
CCR529	chr19:615625-615665[-]	TACTGTATACAATAAGCACATATGTAGCATCTCTGGCCTAT
CCR530	chr1:226334216-226334256[-]	TGGAAATTTCTTTTTACTTTTGTGGAGCATTAGAGTCACAG
CCR531	chr12:2909665-2909705[+]	ACTGGCCTCTCACCTCAACCTGGCCATGTGTCATCTGAAAC
CCR532	chr1:32692036-32692076[+]	AATGACTCTAAAATCACCAGTGCTGTTTGGGGACCCCTGGG
CCR533	chr2:53941681-53941721[-]	TAGAATCTTGGACTTGTTAATACCACTTACTAACCGGGCCT
CCR534	chr1:231489352-231489392[+]	AGTTTTAGATACTTTTGTTCTTTCTTGCTCTTAAGGATTTT
CCR535	chr1:46093181-46093221[-]	TCGAGGGGGAAACTACTGCATAAAATAACTAACTTGGAATA
CCR536	chr5:139496098-139496138[+]	ATGTTCTATAACTCATATATTCAAGGTGTAGGGTATGAAAA
CCR537	chr10:33474588-33474628[-]	AAAGGAAACCTTGGTGGGATTGCTGTGGATGACATTAGTAT
CCR538	chr19:12061232-12061272[+]	TTCCTTTTACTTCTTTTCAATGTCATGAAAGGACTCACACG
CCR539	chrX:44922713-44922753[+]	ATGGGCCAACAGCTGACTCATCACTGCCTACAAACTCAGTC
CCR540	chr10:89506284-89506324[+]	ACCTGACTGGAGAAACAAAATGTGCAATAACGTGAATTTTA
CCR541	chr6:139498624-139498664[+]	TTAGATCTTCCTTGGGCCTTTGGAAAAATATGTGACAAGTG
CCR542	chr6:96051310-96051350[+]	TACCCTGGCAATACTAACAATATGCTGCAAAAATTAATTTG
CCR543	chr2:48605896-48605936[+]	GATGTAGTAAAAATATTTATTGAAAGGTGAATTCGAGTATT
CCR544	chr15:63883094-63883134[+]	TACAAGATTTAATTTCATTATGCACTTTTCAATTTCCTATT
CCR545	chr10:129913401-129913441[-]	TCTGCCACTAAGCCAGAAAATCTCTCTTCCAAAACCAGAGG
CCR546	chr12:70732558-70732598[+]	AGGAAGTGACTTAACAACATTAGGCCTCAATCTGAACTCTC
CCR547	chr11:133993644-133993684[-]	CATTTAGAGGGAACCCTTGGTACCTGGAAATGTGAATCTGG
CCR548	chr6:163876334-163876374[+]	ATGTACAATGACACATTAAATGGCAGTACAGAGAAAAGGAG
CCR549	chr3:136664739-136664779[+]	GCAGTCGTCAATAACCTAAATACTGGGCAAGTGTTGCATGT
CCR550	chr19:48199677-48199717[+]	AAAGGCCTCTCACTCGCCTTTCTTCTCCCAGTATGAGAGCA
CCR551	chr9:34610620-34610660[-]	TCTAGCATGTGGGAAGGGACTGCTGTGAAGAATGACAGATG
CCR552	chr17:7363998-7364038[-]	AAATAGTCCCTAATCCCTAATTTGCACTAGTTAACCCTGGT
CCR553	chr7:18066974-18067014[-]	CTTCTCAAATTCAGGGCTTTTTTGATATCCCAGTAGACAAC
CCR554	chr10:101152073-101152113[+]	CAGAGATGGAACTTCAGGTCTTAAGTGCAAATCAAAGCAAA
CCR555	chr19:50161527-50161567[+]	CGTCCAGCGCTACCGCTACTTCCGCAAGCACGGTCGCAAGC
CCR556	chr17:46199405-46199445[+]	ATACCACTGAATGGAACTGGTGCTGTGACTCCTGCTGCTGG
CCR557	chr1:235274811-235274851[-]	TAACAGCTTCCTTCCCTTTCTGTGTAGCAGTCTTGAAATGT
CCR558	chr17:40280317-40280357[-]	GCAGGCCAGCCCCAACATCGTCATTGCACTCGCGGGTAACA
CCR559	chr6:52129254-52129294[-]	TTAACAGTGTTGAATTCAACTGAAGGCGAGGAATGTTGGTG
CCR560	chr19:2717666-2717706[-]	CGACACCTACATCCCCACCATCGAGGACACCTACCGGCAGG
CCR561	chr11:65744487-65744527[+]	CTCTGCTTCCTCCACCACCATCCTGGACGAGGAACCGATCG
CCR562	chr6:46111027-46111067[+]	TATGATAATTCTTTGCCTAGTATGCATCCATTTCTAGCTGC
CCR563	chr3:160214552-160214592[-]	GTTCTACAGATTCTTTATGATCTACCTCCCACCAGAGGACT
CCR564	chr8:91637335-91637375[-]	GAACAGACATTAATTTTCAGTTGAATGTATTTTTGCAGGCA
CCR565	chr7:44918920-44918960[-]	TATGTGTCATATGCTCCATTTGAGATTCCAAATGCGGCCGG
CCR566	chr19:40331104-40331144[-]	CATTCTGGTGGCAACCGGGGTCGTGGTCGGGGAGGAAAAAG
CCR567	chr11:61079462-61079502[-]	GAAGCTGCACATTCGCACAGTTCCCCTCTATGAGTCTCCAA
CCR568	chr11:124653960-124654000[-]	GTGACTGTAGCTACTACCTATTGCTGCTTATATACTGAAAT
CCR569	chr7:117420601-117420641[-]	GTAGAATTATTAATTTCATATGATGCTAACATTAATCATGC
CCR570	chr11:64024092-64024132[+]	CAGATGTCCATGGAGGGCTTTAGCCGCTACCTGGGAGGCGA
CCR571	chr5:71495286-71495326[+]	CTGATACTTCCACATACTGTTACGAGACTGCAGAGAAAATC
CCR572	chr19:2076902-2076942[-]	GCACGTCTACATCCACCACTTTGACCGCATCGCGCAGATGG
CCR573	chr1:155917639-155917679[-]	TAACCTTGGGGACTCCAATTTGCCAATGATGAGGGAACATT
CCR574	chr2:160050874-160050914[+]	TTGTCACTCTGCTCCTGGAATTTGGTGCCTGCCTGGACGGA
CCR575	chr1:32687995-32688035[+]	CTTTTCCGGTCTTACTCACGTTGCGGCCTTCCTCGCGTCAC
CCR576	chr9:127642687-127642727[-]	TTTAATCACTGTAACTGCAGTATTTTGTACAAGTGTCTAAA
CCR577	chr8:48888347-48888387[+]	GCAAAACACCAGCTCTAAAATACCAGCAACTTTTTGAAGAT
CCR578	chr19:34960729-34960769[+]	GATGTTTTGTAAAACTCAAATAACGACTATACTTATGGACC
CCR579	chr20:61542135-61542175[-]	TACGACCCCAACGCCCTGTATTGCATTTGCCGCCAGCCTCA
CCR580	chr13:21355368-21355408[-]	TAGCTGTGTTTATTAACTTCTCCGGTCTTGTTTTGTTTTAA
CCR581	chr1:1480336-1480376[-]	ACAGAATGGGATTTTACATATGCTGGACAGAAATAAGAGAA
CCR582	chr8:48976773-48976813[+]	AATATCATAGTATCATTTATTGCTGGGATGGATCGAAAAGC
CCR583	chr8:22471722-22471762[+]	CCTCCATCATCCAAGCCGGATCCAGGTCTCTTCTGAAAAGG
CCR584	chr17:79431273-79431313[+]	TGGAAAAGGGTTTTTCCCCATCCGCGTGACAAGGTGTGTGT
CCR585	chr7:129770523-129770563[+]	CCTCTCCCGAACACAACTTCTGCACCTTGGACTCACACAGG
CCR586	chr5:112355860-112355900[+]	AAACTGAGGAAATGTTTCACTAAATATATTATGGTCAATGA
CCR587	chr2:74441460-74441500[+]	ACTGAAATGGTTTAAAATGATGCCTTGTATTTATTGAAAGC
CCR588	chr11:60665609-60665649[-]	ATGACTCCTCTGTCAAGCTCTGGGATCTGCGCAAGCTTAAG
CCR589	chr2:54856246-54856286[+]	AAGATCCTGTCCTCGGACGATTACGGGAAAGACCTGACCAG
CCR590	chr14:95570100-95570140[-]	AAGGAAATCAGCTAAATTACTACAAGCAGGAAATACCCGTG
CCR591	chr20:47841681-47841721[+]	AGTACGATGAAAACCTCTCGTTCCAGGACATGAACCTTTCC
CCR592	chr4:169847711-169847751[+]	TGCTAATACAAATATACACATTGCACAGAAAATACACATTT
CCR593	chr22:32080560-32080600[-]	AGAGGGAGCACTTTTTTTCATCTGGGTTCTCATTCTTGCCC
CCR594	chr22:21803812-21803852[+]	ATGCTAATATATTTATCTCATTGTTTACATAAGCTTTTACA
CCR595	chr17:13937463-13937503[-]	AAGACACCCTTACACCACAATGCTCCATGACCAGGGAGAGG
CCR596	chr13:103492548-103492588[+]	GCATGAAGTGACTTTTATAATGACTCGATCCCTAGACATTT
CCR597	chr12:53910393-53910433[-]	CTCAGGACTCAGGTCTCCCATAGCTGCTTATTTACCCGTTT
CCR598	chr11:94906358-94906398[-]	TCATACATGTGTAAAGACCTTTCACATAAGATAAACATTGA
CCR599	chr8:6615087-6615127[+]	CTGGTTGTACAACTTTAGCATCGGGGCTGCTGGAAGGGTAA
CCR600	chr17:57290276-57290316[+]	AGTTTGGGCCAATCCACAGATAGCTTAGGTACCTATCCAGC
CCR601	chr3:155632238-155632278[+]	GAACAACAACCCTACCAATATCAGATGAAGATAGAACCCCA
CCR602	chr11:57468597-57468637[+]	TTTTTATTCTGATTAGCCATTTTAAACCAACGAGGAATAAA
CCR603	chr1:147247024-147247064[-]	CCCAGAATCTGCTCTGATGCTGCATAAAAGTGGGGTAAACT
CCR604	chr1:183604788-183604828[-]	CAAGAAGAGGCCTTTGCCGCTGGTCGGGATTGGGATGTCGA
CCR605	chrX:147030969-147031009[+]	TAAGTTGGAAACACTAAATGTTAAAGATGTAGCAAACCCTG
CCR606	chr16:58581162-58581202[-]	AGGACTTGGATGTGAAATCATTGCTGCTAGAGGCTTATGTT
CCR607	chrX:152599611-152599651[+]	GGAAACGCGCCGCGGGGCTGTTAGCTCGGCTGGGCACGGGC
CCR608	chr4:139089071-139089111[-]	AGATAGTTTCACTTTCATCATATTTTATACGTTGATTCTGA
CCR609	chr16:69364935-69364975[-]	AAGTACGGTAACCTAGGGCATGTGAACATCGGCGCCATTCA
CCR610	chr10:53458795-53458835[-]	CGAAACATGTTACTTCAAAATCCACAACTGGCTTATGCACT
CCR611	chr11:89935020-89935060[-]	ATAGTAACTAAAGGGGAATATATGAATTGTTTAACAAATTA
CCR612	chr5:110284500-110284540[-]	CCCTGAAATACACAGGAGAATTGACATCTCACCAAGTACCC
CCR613	chr3:156865829-156865869[-]	TATGTTAATTTTTTTGCACATTAAAATGCCCTAGCAGTATC
CCR614	chr12:120636413-120636453[-]	TGGGCTGGTCATCCAGCAGGTGTTCGACAATGGCAGCATCT
CCR615	chr21:34400986-34401026[+]	CCGACTCATCTTTCCTTCTCTAAGCACAAAGTGATTTGGTT
CCR616	chr1:84702371-84702411[+]	CAGGTGGAAATTTCAAGCACTTTTGCACATTTAGTTCAGTG
CCR617	chr6:110934499-110934539[-]	TCTATCAAGAATCTTTTTCATTGCACTGAATGATTTCTTTT
CCR618	chr15:66180164-66180204[+]	TGTCAGAACATCTAAGGCATTTCTCTTCTCCCCTAGAAGGC
CCR619	chr16:69730925-69730965[+]	TGGGTTTCTACTAAGGGGTTTAGCCATAACTGTGCATAGAA
CCR620	chr12:68057516-68057556[+]	TATAGTTCCTACTCATTCTCTTTCCTTTTATCAGATCTTTC
CCR621	chr3:138426059-138426099[-]	ACTGTTCAAACAAATCCATATACTGAAAATGCAACAGCTTT
CCR622	chr1:26449059-26449099[+]	GGAAACGTGACACATATTATTTGCAAATACCATGGATGATA
CCR623	chr6:160174558-160174598[+]	GCAGCTGTCCCAGGGACGTATTGCACAACTTGAAGCAGAGT
CCR624	chr1:173794312-173794352[+]	TAACTACCGGCAGCGTGGGATTTCGTGATTGTTTTTCGCCA
CCR625	chr1:150548494-150548534[-]	CTAGTCTAACCATGGTGCTATTATTAGGCTTGCTTGTTACA
CCR626	chr3:48963101-48963141[+]	TATGTACTGTTAAATCCAAATGCTCTTACACTTTAAGGTTC
CCR627	chr2:68406021-68406061[-]	TGATACGTCATGTTGTGGGATCTTTAGAAAACTTCATACTG
CCR628	chr19:57766493-57766533[+]	CATGAATGCGCACATTTTATTGTACCACTTAATACTGTTTA
CCR629	chr1:45975859-45975899[+]	AGGCCCTGGGAATTCTGTACTGCTGCTCATGGGTGTAGTCG
CCR630	chr7:105731947-105731987[-]	AAGCTGTTTGCCTTCCAAAGTGTTTACACCTTAAGCCTTAA
CCR631	chr19:55859346-55859386[+]	GTGTGACCTCATCTTTCTCATGGTGCTATCCTGGTGCTATT
CCR632	chr12:112460996-112461036[+]	TTCCAGTCCTTAAAACTCAATAGCAGTATTGATGAATATAT
CCR633	chr6:137041606-137041646[-]	TGGCCAACAACATCATCCTCTACTGTGATACTAACTCGGAC
CCR634	chr5:40831886-40831926[-]	TTGTAGACTAAAGGCAATGATGTGGGACTACTTGGTCGAAT
CCR635	chrX:134185226-134185266[-]	CCCCAAGGAGCCTGTCACCTTCAGCGAGACCCATTTCCTCC
CCR636	chr17:76793123-76793163[-]	TTTATTTTTGACCAGTCCTGTGGCTTCCATTAGCAATATGT
CCR637	chr11:92626125-92626165[+]	GGCCATGGTAAATATATGCATATTTGCACTATCTGCTTAAT
CCR638	chr11:61906378-61906418[+]	AATAACTCGTGGCCCCACAATGACACGGAGATTGCCAACAG
CCR639	chr11:32626077-32626117[+]	TTCTGTATACACTTTTTAAATACTGGGGTCATATTTTTATT
CCR640	chr5:96498703-96498743[-]	GTTTAATATATTTTTTAAAGTTACTGTAATTCCTTTTTGAG
CCR641	chr3:24020007-24020047[+]	TCTTTGGCAAAATCTTTGGTTCAGGGTACTAGTTGTTTAAA
CCR642	chr16:68261750-68261790[+]	TTACCTGTTCCTGGGCCCATTACAGAGCCTCTGAAGTTTGC
CCR643	chr2:166535270-166535310[+]	TAGAATTGAATTTAATCCTATCCGTGTTCGGACTCACTTTT
CCR644	chr14:29238182-29238222[+]	TAGAATGTGTATCTAAATAGTGACTGCTTTGCCATTTCATT
CCR645	chr19:45854237-45854277[-]	ACCTGAGTCCCAGGAGCCCTTGGAGCATCCACGTTCAGTGT
CCR646	chr16:30774567-30774607[+]	TGATGCCACACTCCTCATCGTCAATCGCTACTGGGCCCAGG
CCR647	chr12:122958746-122958786[-]	GTTTTCAGTTTCAACCACCATTACCTCCTGACACTCCTCCA
CCR648	chr14:95560408-95560448[-]	ACCTCATAACCAAGCACCTTTATGAAGACCCGCGGCAGCAC
CCR649	chr12:95882898-95882938[+]	CCGTTTCTGTTTCTTTATACTTGCTGCTAGAGTGGAGGAAA
CCR650	chr1:205589107-205589147[-]	ATACTGAGCCCATCTCTCCCTACAGCTTCTCTTACACCAGC
CCR651	chr7:42956846-42956886[-]	TTGGTTAAGTCAAATCTTAATGCCCTCTTCGCTATCAGATG
CCR652	chr22:36135039-36135079[-]	GCTTTGTGACAGTCTCTAATTCCCTTCCCTTCTCGTTAAGA
CCR653	chr18:19119912-19119952[-]	ATTCTGGCTGAATACCCTGATGGCAGGATAATAATGGTTCT
CCR654	chr12:57929561-57929601[-]	CACATCATTGTCAATCCTAATGCTGCCTATGACAAGTTCAA
CCR655	chr9:115251942-115251982[+]	CATTTATTTTGACAAATAAGTGCTGCTTCCAGAAAATTTGA
CCR656	chr8:17053094-17053134[+]	GCCAAGGATCTTCCCATCTATACCAGGACCATGTCTGGAGG
CCR657	chr10:120442184-120442224[-]	TGCAGATTTGCACACATAAATTCCTCAGGAAGAGTTTGCAT
CCR658	chr22:50357152-50357192[+]	TCCTGCACACACAATGCAAGTCCTGGCCTCCGCGCCCGCCC
CCR659	chr20:5096107-5096147[-]	CACTCCACTCTCTTCAACGGTGACACTCAGTATGTCTGCAG
CCR660	chr17:57761076-57761116[+]	CCACGGTTGGATCACACTCGTGCAGTCAATTATTTCAGCAA
CCR661	chr1:213069233-213069273[+]	ACAAAGTACTTTTTAACACATGCAGTCAATGGCTATAAAAA
CCR662	chr12:69663704-69663744[+]	AAACTGTTTAATGGGGCTGATGTGTAAAGCTGTTCAAGTTA
CCR663	chr4:83274733-83274773[-]	TTGTTTTAATAATACTTCCTTATGTAGCCATTAAGATTTAT
CCR664	chr12:58150809-58150849[+]	GTGAGCTCTGCTACTTCAAGTACCAGGTCCTGGCGATCAGC
CCR665	chr10:103870396-103870436[-]	ACGCTACTTCCGCAGCATCTTTGAGGGGGGTGCTACGGAGC
CCR666	chr17:30678878-30678918[+]	ATATGTCACAAGAAATTGTATACAGGACCTGGCTTAGCTAT
CCR667	chr11:9610437-9610477[+]	ATTGTAATAAAAGGTGTCTTTCCCTGTAGTGACCTGTAAAA
CCR668	chr4:122737996-122738036[-]	ATATACAGATATACAACTGTTAGCTTTAATTGGCAGCTCTC
CCR669	chrX:118725071-118725111[-]	CCAAGAGACATCTACCAAGATTATACTCAAGACTCTTTCAG
CCR670	chr6:16302818-16302858[-]	GGATTTCTAAATATATAAAATGACTGTTCCTTAGAATGTTT
CCR671	chr5:68809814-68809854[+]	TTTGCTTTAATAATTTTCTTTGCTGTGAAAACTCGAAGAAA
CCR672	chr12:109520783-109520823[+]	AAACCTAGTCAACACAACCCTAAACTGAACAAGAACCCAGG
CCR673	chr3:133307865-133307905[+]	TCTGGAGGCTCTACTTCAGGTGCTGCTATAATGCCTCATCT
CCR674	chr4:17814008-17814048[+]	TGGTGGCCTTTTAAATTATTTGTTTACTTTTCTCTTAAAGG
CCR675	chr6:11135032-11135072[+]	ATCTTTTGTTTCACCAGCTTTCTACTTATACACTTATTCCT
CCR676	chr6:83878867-83878907[-]	TACAAAACTGTCAATAATAATGGCAGTACTAAGAGATTTAT
CCR677	chr2:128046951-128046991[-]	GTTTGACTTCTATGAGCAAATGGACAAGGATGAAGAAGAAG
CCR678	chr16:71681145-71681185[-]	ATGCAGTTTCTTCATACTTCTGTCACTTTTTCCATTGGAAG
CCR679	chr8:26223874-26223914[+]	ATGACTGCATATTTGACAAATTTGAATGTTGTTGGAATGGA
CCR680	chr22:19116791-19116831[-]	CCATCACAGGCATCCTGGATTCACAGGGAGCAGCTGGGACA
CCR681	chr15:99503269-99503309[+]	TTTTTTCCCCCAAACATTTATCTACCTCACTCTTATTTTTT
CCR682	chr2:175939077-175939117[-]	TTATTAGATTTATTAATTTTTCTGTGCTCAATGTGTAAATT
CCR683	chr17:17714243-17714283[+]	ATGTATATATGTTGGGAACATGCTCGCTTCTCCCGTGTGTC
CCR684	chr2:114482986-114483026[-]	TAAAGTAGTATTAATGTGCATTATCATTAATGGCCTTATTG
CCR685	chr19:10431534-10431574[-]	CCTGAACCTACACAGCCTGCTCCCGGCCAGCAACCTGGCGG
CCR686	chr17:27240926-27240966[-]	GATCCCTGAGGAATCACAGATGCACCTTTTGAACTCTGAGC
CCR687	chr1:38048443-38048483[-]	GGTACTCGTTCCCCTCACATTGAAACTTACCTGAAGAAGGA
CCR688	chr20:30365392-30365432[+]	ATAAGGAAGTGAACTTTACATCTGAACTACGAAAGCATCCT
CCR689	chr7:43678988-43679028[-]	AATTTTGGTGTAATTCTAACTTGGGCACAACAAATGCTATT
CCR690	chr2:196601869-196601909[+]	TTTTAAGAGGGCTGTAACAGTTGCTGCTAGTATTAGGGTTC
CCR691	chr17:45747040-45747080[+]	TCAGGCTATGCCCACCCTAATAGAATTAATGAAAGACCCCA
CCR692	chr10:121336140-121336180[-]	AAGTACCGCCTTATGGAGTATACGGGCAACCATGGAATCAA
CCR693	chr2:153505933-153505973[+]	GAACAAGTTACCTACCACATTTCACTTTAGTGTACCTATTT
CCR694	chr19:47287399-47287439[-]	TAACGATGGACACTGACTCTTCCCAACCCCACCTACAGTAC
CCR695	chr1:156044123-156044163[-]	TAAAGGCGTTTATTACCATATAAATGTAGCAAAGAACCTGG
CCR696	chr4:57799020-57799060[+]	TGTTGAACAGTAACACTTTATACATATATATATGCATGTTT
CCR697	chr2:190535186-190535226[+]	AATGTTGTCTCCTTTCTAAATTCTCTGCCGATTTGGGAAAA
CCR698	chr15:41592769-41592809[+]	AAGAACAACAAAATCACCAATGTCTTCCATTTTGAGATGTG
CCR699	chr7:27202757-27202797[-]	GGCAGATTGCTCTGCCAAGATACTTGAACACTGTGTTTTAT
CCR700	chr16:3776635-3776675[-]	GATATAAATTACTGAGGTTTTTAACATGTATTCTGTTCTTT
CCR701	chr17:76089160-76089200[+]	GACAGTGATAAAATCTCAAATGGCTCTAGCATCAACTGGCC
CCR702	chr14:23495058-23495098[-]	CTTGGATGTTAACATTACACTACTCACTACTCAATCTCAGC
CCR703	chr1:43316891-43316931[+]	CAGTGTGGCAAAACCTTCAATAATACCTCCAACCTGAGAAC
CCR704	chr20:5095816-5095856[-]	GTCTTTTCTGTCACCAAATTTGTACCTCTAAGTACATATGT
CCR705	chr10:35626015-35626055[+]	AGTCCCAAGCTCCGGAGGAATGCCCACTCCCGGCTGGAGTC
CCR706	chr2:61413953-61413993[+]	TAAGCGGAAAAAGTGTCACATTTACCTCTTCCCTATCTTTT
CCR707	chr18:48702281-48702321[-]	GACGATTCATACACTTCCAGTGCTGCCTTCTTTACACTGCC
CCR708	chr10:5789685-5789725[+]	AGAGCAACCAAATCTCCCAATGTGAGTCAGAAGACTTAGGC
CCR709	chr6:114178664-114178704[+]	TGCTCGACTTTTCCACCCTTTTTCCCTCCCTCCTGTGCTGC
CCR710	chr13:23932585-23932625[-]	CCTAGGGCCAGCTCTCTATGTGTACAACAACGCGGTTTTCA
CCR711	chr2:71577009-71577049[+]	AAATCCGTCAACCAATCCATTAACCAAACAGTTAGCCAGAC
CCR712	chr1:3551692-3551732[-]	GATGGAAAGGTGGGAACCAGTGCAGGGCACTCAGGAAGTCC
CCR713	chr17:73773499-73773539[-]	CTAAGTGTCCAAAACCTAAATTGAATGTACTAAGTTTTCAC
CCR714	chr4:1205317-1205357[-]	CCCCGCCTGCACCAGTGCCGTCCTGCTGATGTGGTAGGCTA
CCR715	chr18:55269585-55269625[-]	GGGATTGACCCCACTCCCTATTACTGGTATACGGATCAGGT
CCR716	chr9:115381431-115381471[+]	TTACAGACTTTACAAAACCATACGTGGTTCTCAGGCAACAC
CCR717	chr7:79840344-79840384[+]	GAGTGACGGCGATCATCTTCTGTGTAGCACTGAGTGACTAC
CCR718	chr10:112773030-112773070[+]	CTATTTTGTATAATTACATATTGCTGCTTGTGTGTTTTTTT
CCR719	chr5:87491195-87491235[-]	TACTTTGTAAACCTGCTGACTACCTGTATGTATTGTATATA
CCR720	chrX:53578144-53578184[-]	AGAAATGCCCTCATTGACTTTTTCTGCTCCATAGGTACTGG
CCR721	chr2:180835398-180835438[-]	AGATGATCAATTCACTCATATGCTCCCTCTGGAGGATGACT
CCR722	chr22:38363746-38363786[+]	GCCCCATGCCCAATTTTCATTCTCACTTTATATGTGTAAAT
CCR723	chr19:7975589-7975629[+]	CTTCATCGCCATGGAGCTCATGGGCACCTGCGCTGAGAAGC
CCR724	chr4:146007113-146007153[-]	GCTTCAGCCACCTGCAACAGTCACTTCTGGGAATTGCTTGA
CCR725	chr20:5100471-5100511[-]	AGCCGAAACCAGCTAGACTTTCCTCCTTCCCGCCTGCCTGT
CCR726	chr6:88221238-88221278[+]	TGTGTGATTTTAGCCTCACGTGAGACTCCTTTTAAGACTAA
CCR727	chr19:9675933-9675973[-]	CAACATTTGAGAACTCACCATGGGGCCATACAATGTAGAAA
CCR728	chr1:38322970-38323010[-]	AAACCCTGGTTCCACACCCATGCCAAGAAATATTGAAGGTG
CCR729	chr20:32264496-32264536[-]	AGGGCTTGGAGGGACCAGGGTTTCCAGAGATGCTCACCTTG
CCR730	chr20:43383147-43383187[-]	CTTGGTACTGACTTTCTTTATGAGGGACTCCTAAGGGTTGT
CCR731	chr11:65383904-65383944[+]	TCCTGCTCATCTTTCCCTTCTTACTGTACATGGTGAGACGC
CCR732	chr3:182990255-182990295[+]	ATGATGATACTTACAATTTTTAGCAGGTAGCTTTTTAATGT
CCR733	chr5:65374974-65375014[+]	GTATGTTTTTATTAGGAGAATAATGCAATAAAATATGTAAT
CCR734	chr8:77778049-77778089[+]	TTGTACTTCCATTCATACTCTGGGCACTTGTGTTGTATTGT
CCR735	chr1:153642304-153642344[-]	TTTGTACCACATATCCCATTTGACTTCTATTTGGTGAGTAC
CCR736	chr19:7087880-7087920[+]	TCAAACTGTGTTTTTCAATTTGTACTGTATTTGTTTCTCTC
CCR737	chr16:22344970-22345010[+]	CTGTGTAAGCTATGGTGGCATGTGGTACCTTAAAGGGACAG
CCR738	chr3:179305852-179305892[+]	TAGTATACTCAGGAAAAGAATGACCATCTTTTGTAGAATGT
CCR739	chr21:34652170-34652210[+]	TATAACTCATGGACTTATAATGTGCAATACTGGAAAAACGG
CCR740	chr12:57928096-57928136[-]	GAGAAGCTGCTGGGACCAGATGCTGCAATCAACCTTACCGA
CCR741	chr1:100752700-100752740[+]	ACAGGACCAGTTACACTCCATACGCAAACCGCGATACATTT
CCR742	chr7:116528190-116528230[+]	GCAGCAAAATTCATCATTCATGCCCCTCCTGGAGAATTTAA
CCR743	chr8:74701318-74701358[-]	GTACTTGAAACTTAGCTCTCTATCCTGAAAGTTGAAGTTAG
CCR744	chr15:69561923-69561963[+]	GCACTTACCTGAAAACTTAGTATGGAGCTCTTTTAAAATGT
CCR745	chr14:76455267-76455307[+]	CAGGCCGAGAATCACCTCAATGGCAAGAATTCCTCTTTGAC
CCR746	chr11:118473145-118473185[+]	AGGCAGACGACTAGATGACTTCTGCACTTTTAGCTGGTTGA
CCR747	chr20:43129755-43129795[-]	TGCAGTATAGCTACTCCTTATTCCACCTCATGCTCTGCTTG
CCR748	chr17:74388063-74388103[-]	CAGCCGTGCCCCCCCACTTCTGCTACCTCTCCCAATGCAGT
CCR749	chr1:42645070-42645110[-]	AGTTTGATGTTAACCACAAGTGCCAGACTGATTTTTCAGAC
CCR750	chr11:111955065-111955105[+]	GGGACAGATTTCTAATAAAGTGCTTGGTCTTAAAATACATG
CCR751	chr6:109689447-109689487[-]	AAATGAAAGGATACCATTAGTGTGTATAACAGATTATTGTT
CCR752	chr18:13666428-13666468[-]	ATAGCAGTATAGAAAATTCCTGCACTTTAACCCTTTGGAAA
CCR753	chr10:103871255-103871295[-]	AGGTTGTTCCTCAAAGTCATTCAAGCTGTACTCGCCGAAGG
CCR754	chr10:120460838-120460878[-]	GATGACCTTATAAAGCTGTTTACGGAACATGTTGCAGAAAA
CCR755	chr3:169492070-169492110[+]	ATTCTGATATCAAAATGCAGTATTCGCACCACTGTGAGCAC
CCR756	chr2:198416194-198416234[+]	CCTCATATTAGCAATTACATTACACTACAAGAAAATGTATT
CCR757	chr2:17494531-17494571[+]	TGATTTACAGTTTCCTTTATTGCCAGGCAACTGCAGCAAAA
CCR758	chr16:23077659-23077699[-]	GTACGTTACTTAACTTTATTTTGCTGCTAATTTGCGCATTA
CCR759	chr13:49783453-49783493[+]	TTTAATAGTATACTTGCCATTTGAGCCTCACTGCAAAATTA
CCR760	chr8:41834759-41834799[-]	AGGAAACGAAAAATCACTCTTTCCAGCCAATCAGCATCATC
CCR761	chr8:119209399-119209439[-]	TCCAACTCTTAAGCACTTTATATGAGAACACTACACCAAGA
CCR762	chr7:77584522-77584562[+]	CAGCACCGTTTCTCCATCAATGCCGTGAACTTGCCTTACTT
CCR763	chr11:64536692-64536732[-]	GCTCGCTTAAATGGGACCCTTCGGGAAGACGATAACAGGTA
CCR764	chr1:154223650-154223690[+]	TCCACCTCCGTCTTCTCCTCTGCCAAGCAAATCCACATCGG
CCR765	chr19:10433861-10433901[-]	TGCTCAACAACCTGGGCCCATCCGCGTCCCTCCAGCTGCTG
CCR766	chr20:49518582-49518622[-]	GACTTTTATTTGAAAAACACTACATGGGAGGATGTAGGACT
CCR767	chr1:201938751-201938791[+]	ACAGTCTGTTTTTAAAACCATAGGTGGGACAGCTATGGCCA
CCR768	chr12:32866206-32866246[+]	ATCAGTAATCCTAATTCCATTATCCTCGCTGTCACTGCTGC
CCR769	chr20:54945146-54945186[-]	GCCAGGGCTGCCATATAACCTGACAGGAACATGCTACTGAA
CCR770	chr14:20926700-20926740[-]	ACCCTGTCCAGAACTTCTCCTGAGCCTGATGACCCACAGAC
CCR771	chr3:108303993-108304033[-]	ACTATTTACATCAAATCAGATATTAACAAGTGAATGCTTGA
CCR772	chr12:104712725-104712765[+]	ACAGAATCACATTGGCTCTTTGAATTGGGGCTACCGAGTAG
CCR773	chr10:14887384-14887424[+]	AATGGACATAGGTGGAGAAATGGTCAGAGCAGCAGTGGGAG
CCR774	chr22:24939922-24939962[-]	TGTGCTCCAGCCCTGTCAAGTACTGCTGCTTCACCCCCAGT
CCR775	chr6:36823554-36823594[-]	GGGTAGACTTGCTACCCTCTTGAGCAGCTCTTCTGAGATGG
CCR776	chr13:49039413-49039453[+]	CCTGGAGGGAACATCTATATTTCACCCCTGAAGAGTCCATA
CCR777	chr9:95474433-95474473[-]	CTTTGGGAACCAAATGGACCTTCTGGGACAAGCTGAGCAAG
CCR778	chr20:49509207-49509247[-]	TGGTGTGTATACCAGCAACATGACCGCCTCAACTATCACTC
CCR779	chr17:20919164-20919204[-]	TGGACACCGGTCCCCTCACATCCCGTATAAGTTGCTGCACC
CCR780	chr1:16202770-16202810[+]	GATCGGACAAGACATTACGATCAGGATTACTATAGAGATCC
CCR781	chr2:190647141-190647181[-]	TGCTTGGACTTTAACAAATATTATACATAATCTGGTAAGAA
CCR782	chr22:43570504-43570544[-]	CCGACATCCTCTTCAACTTCTCACACTTCAAGGACTACAGG
CCR783	chr16:74655357-74655397[-]	CTGCTTTGAAAACAGGGCCATGGGAACTCTGTTTATGCCCT
CCR784	chr6:33255743-33255783[-]	GCAGTTTGGACCCTACAGACTAAACTACTCTCGAACTGGAA
CCR785	chr1:244218736-244218776[+]	GTGGTACGGTCTAAAAGCAGTCTTGTTTCCTGGAAATAAAA
CCR786	chr1:224377914-224377954[+]	CATGAAACTTACTCATATTATGGGCCTCTGAATTTACTTAC
CCR787	chr21:43409542-43409582[-]	TTTAAGAAAGTAATACCAATTTAGACTCTAGTTTGTGTTAC
CCR788	chr1:226342392-226342432[-]	GGACAGGCCAAAACACACACTGACAGCTCCGAAAAAGAACT
CCR789	chr7:25158691-25158731[-]	CATAAGTCTCTTCTAGGCACTGTCGGGGTACATACTGAGCT
CCR790	chr4:39460050-39460090[-]	TCGGCCTCACCCCCAGTGTTTGTGTTTCAGAATGAAGACTA
CCR791	chr21:30426545-30426585[+]	GGCTTTTATAATGGCTGAAATAACGATAAAAAAAGACTAAT
CCR792	chr5:40760889-40760929[-]	ATTATTTTTGGCAAATACAGTGAGCACTTATGTAACCAGAT
CCR793	chr14:63860537-63860577[-]	TTTACACACTGTCAGGAGCTTATCACTCTTCCATGCACAGG
CCR794	chrX:12704276-12704316[+]	AATGGGCAGACCAAATCATTTCGTTTTGACTGCAGCACTTC
CCR795	chr3:33908657-33908697[+]	AATATTATCATACTTTATCTTTCGTATGCTGATTAGTAAAC
CCR796	chr1:32373892-32373932[-]	GTAGATGGAATAGAAGCCCTTGTTGCTGTAGATGTGCGTGC
CCR797	chr5:96365749-96365789[+]	AAAGGTCACCCTTTTTTTATTCGGCAGGTATCAAGTTAGAA
CCR798	chr16:3274220-3274260[-]	CACACTGGAGAAAAACCCTATGACTGTAATCACTGTGGGAA
CCR799	chrX:46913559-46913599[+]	GTGCTCTATAAAAAGCTGCATCACTGCCTTCCACGTCACCT
CCR800	chr7:4805122-4805162[+]	GGGTGAGCTGACCCGGGCAATGTGCAGGAATGTGGGGAGCA
CCR801	chr6:20490912-20490952[+]	TAAGTCAGCAAGTGAGAAAATGTGCAATCAGGTGTCTCTCA
CCR802	chr17:57743906-57743946[+]	GTGTGAAAAGGCTGGCCTACTGCAGCGTGCATTAGAACATT
CCR803	chr17:80021360-80021400[-]	TTGCAGGTCACTATGGCGCCTTTCTGCAGGACGAGTGGGAC
CCR804	chr2:42805862-42805902[+]	TCAGTTGTGGCTTTAAAAATTGGTGGGATTAGTTTCTTTCT
CCR805	chr1:226548665-226548705[-]	TATTTAGATTTTCTTTTTTATCTTGCACTTATTGTCCCCTT
CCR806	chr1:161091668-161091708[-]	CTCTACAGCTACCTTACCACTGAGCCGTAAGACAAATGTAT
CCR807	chr3:100296041-100296081[+]	TATTTTGGGTGATACTTTCATTTTGCACATCATGCACATCA
CCR808	chr17:7507114-7507154[-]	CCAGTTAATCCCAATCCCCTTGCAACCAAAGGCAGCTTCTT
CCR809	chr10:61612405-61612445[-]	CAGGAAGAAGAATTCATTAGTAACACTTTATTCAAGAAAAT
CCR810	chrX:39922049-39922089[-]	ACTGTGCAAAACCAAACACTTGATCCCTCAGGAGTCCAGGC
CCR811	chr6:37142348-37142388[+]	TTGAACTTGCCTCTTTTACCTGCTGCTTCTCCAAAAATCTG
CCR812	chr14:39501954-39501994[-]	TGTAATTTTCAGCACTTATGTATACACTTTTTCTGTACTTA
CCR813	chr7:27181284-27181324[-]	TTTAATCATGAGCCTGTTTATTGCCATTATAGCGCCTGTAT
CCR814	chr16:23584951-23584991[+]	GCCCTGAGTAGGCTCCTTAGTTGCTGCTTTACCTGATGAGG
CCR815	chr16:2809611-2809651[+]	ACCGTTCAACTTCTGCTGACTCTGCTTCCTCCTCCGATACT
CCR816	chrX:84525467-84525507[+]	TGCTGCTCATTACTTTTTAGTGAGCTACTTTGCCATAAATT
CCR817	chr1:206822261-206822301[+]	CCAATGGTAGTATACCCCTATGCAGTGTATTGCCAAAACTG
CCR818	chr7:138992148-138992188[+]	TTAGTGTGTCTTAAAAATTATGTACTGTACCAGCCATGGAT
CCR819	chr11:113661257-113661297[+]	ACAGCAAGGAGGATGCCTTCTCCGGGACAGATTGGATGTTG
CCR820	chr4:83847379-83847419[-]	TCAAGTTATTTTTCAAAAGATTGCAATAAGTTTTTGGTCTA
CCR821	chr20:49507437-49507477[-]	GTCTTTTAGACCTATTCAAGTGATGCTCATGATCCTGTTAC
CCR822	chr19:37211690-37211730[+]	TACCATACGGAATAACTGTCTACTGTTTACTAGCATATAAA
CCR823	chr21:43412728-43412768[-]	ACTCCCAGCAAAAAGGAGGTTCCAAGCGGACCGAAGATTGC
CCR824	chr17:20931886-20931926[-]	ACTGTGTCTTCTTCGGCTGTTTCACAAAGAAGCATATTCAC
CCR825	chr20:47888149-47888189[-]	CCTAGGGCCAACAACCATCCTGCTGCTTACTGGCAGAGGGA
CCR826	chr7:5266942-5266982[+]	TCTGCGGCCACAAAAACATCTGCTCGCTAGCCACGTGAGTA
CCR827	chr6:38670757-38670797[-]	ACGGACGAGGCCGCCCTCAGTTGCTGCTCCGACGCGGACCC
CCR828	chr13:114295276-114295316[+]	TGGTGCGGCTATGGAGACTGTCTGGAAGGCTTGGAATGGTT
CCR829	chr19:40540357-40540397[-]	TTAGACTTCACCTACAACTTTCTCTGCATCAAAAACTTGTA
CCR830	chr18:55274443-55274483[-]	TTTTGACTCAATCCTCTCAGTTGTACTTGGAGACCTGCCTC
CCR831	chr19:49378102-49378142[+]	CCAGAAACCCCTACTCATGATCCGGACCCTGAGACTCCCCT
CCR832	chr16:74340125-74340165[+]	TTGTGATCCAGCTCCATATATTGTTTACCTTCAAAGATACA
CCR833	chr2:122486054-122486094[-]	AGTATTTCAAAAACTAATCGTCAGACGTCTACAAAAGGCCA
CCR834	chr12:19672247-19672287[+]	AGGATATTGTACTTCACTAGTGCTGCCAGAGGAATTGTTAA
CCR835	chr3:130653463-130653503[+]	CAGTTTAAAAATCCCCTTATTATGCTGCTTCTGGCTTCTGC
CCR836	chr12:25358986-25359026[-]	CAAACAGTATATAACTTTTTTTAGGGGATTTTTTTTTAGAC
CCR837	chr6:35542682-35542722[-]	AGCTTCTTCTTTCATTCTAATCCTTGCTATTAAGAATTTAA
CCR838	chr3:43122028-43122068[-]	GAGGAGTACATTCTGGTCTTTAGCCGAACCCAGAACAGACT
CCR839	chr21:34635995-34636035[+]	CATTGTTTACATATTCAAAGTGGTGCACTTTGAAGGAAGCA
CCR840	chr14:96998728-96998768[+]	CTCTGAGAGCTATCAAACTATGGGCCAAACGTGAGTTCAGA
CCR841	chr8:442003-442043[-]	ACTTCCGTACCTTTTTCTTGTATGTAGCACGTATAAATGCA
CCR842	chr16:69342802-69342842[+]	TATAGATGCATAAACAACACTTCCCCTTGAGTAGCACATCA
CCR843	chr20:57607317-57607357[-]	ATTGCCGGCGTCTTGGCGATTCGGCCCGACGAGCTCCGCTT
CCR844	chr1:47761471-47761511[-]	CATGGATGAAACACGCAAATTGTTACTTTTGTTGGAATCTG
CCR845	chrX:118975701-118975741[-]	CTAAAAAGACAACCCCACTTTTGAGCTTCCTGAAAAACAAG
CCR846	chr12:120992566-120992606[+]	TGCTGATCCTGATACATTAGTTAACTGGGACTTTGTGGAAC
CCR847	chr11:59410363-59410403[-]	GCTACACCAGCACTCTCCAATCCTCACCTCACTGCTGTGCT
CCR848	chr17:7755609-7755649[+]	ACCGGCTGGTGCAACAACATTGCCTGGAACGTGGGGCCCCT
CCR849	chr11:34093443-34093483[+]	TTTAGGATGCCGTTTCTAAGTACCAGGAAGTCACAAATAAT
CCR850	chrX:153994195-153994235[+]	TGAATGTAAGGACAACACACTATACACCTCTTGCATGTGGT
CCR851	chr1:68955258-68955298[-]	AAACCAGATTTCCTGCAACTTCGCCACTTAAAACTCTACCA
CCR852	chr2:204296709-204296749[+]	TATGAGTTGAGTAAAAACCATCCAGGGGAACTTGAGGGAGC
CCR853	chr1:38283091-38283131[-]	GGTGTTTTTTACCACTGCAGTACCAGTAGCCAGTAGCCCAG
CCR854	chr1:169391392-169391432[-]	AAGAAATGACATCATTTCTGTACCAGGTATTCAACCTTTGG
CCR855	chr17:79982535-79982575[+]	CACGCGAGTGACTACCGGCCTGTTTCTCTCCTAGGGCAACA
CCR856	chr17:16366448-16366488[+]	GGTCTCTCTGACTGCTGTTCTCCCCCAAAGCAGGCCCTGAA
CCR857	chr12:49054347-49054387[-]	CGAATCAGGTTCTCTTCAAGTGCTGCCAGGGATCTGAAGAG
CCR858	chr1:36499900-36499940[+]	GGAGGGATCAATAATATTCTTGTACCTCATCAAAGGTAAGA
CCR859	chr1:10521595-10521635[-]	TGCATTCTCTCCGGAGCATCTCAGCAAGCAAGGCCTCACCA
CCR860	chr9:90346177-90346217[+]	AAATGTTACCTCTATTTTAATTACTGCTATAAATAGGTTTA
CCR861	chr8:48879970-48880010[+]	CCACACACAGTTATCCTGTTTGCTCACAATGATCTCGTTGA
CCR862	chr5:32595051-32595091[+]	TATGATGTATATGCTATTTTTTGCTGCTAATCTCCAGATTT
CCR863	chr11:65116344-65116384[+]	CTGCGATCGTGGCTACCACATGTACTGTCTCACCCCGTCCA
CCR864	chr10:93789864-93789904[+]	TAATAAACATCCCCAAGGTTTGTGGCTGGCCATACACATAG
CCR865	chr6:56970177-56970217[+]	ATGAAGTGCCTTTTTAATTCTACACTTTTCTTTAAAACTTA
CCR866	chr7_gl000195_random:82726-82766[-]	ATTTTTAGCTCGGTACACTTTATCTCAATGTGATGTTTAAT
CCR867	chr20:43533667-43533707[+]	AATGCAGCCTACACACCCAATTCGTCTTGGTCTGGCACTAA
CCR868	chr17:41594621-41594661[+]	TGAAATGCTGACCACCAACGTGCCGGAAATCCAGAGAACCA
CCR869	chr7:127221883-127221923[-]	TTTCTGCCAAATGCCATTAATGCTGCTTTATCCTTAGGCCC
CCR870	chr2:73478410-73478450[+]	GCGGGATTACTCAAGGACTATTCCAGGAAAACAGCAGCTGT
CCR871	chr19:9771413-9771453[-]	CATTGAGGCACATCTCACCATCAGCTTCAGAGGATGTCAGC
CCR872	chr16:30129013-30129053[-]	TGCTCTCTAACCGGCCCATCTTCCCTGGCAAGCACTACCTG
CCR873	chr5:37309503-37309543[-]	AATCTTTGGTCAAAAACTTTTCTGCCTAAAATTAAGAAGTA
CCR874	chr5:64020026-64020066[-]	CTCTGGCAATATATTTTTAATGTGCTGTAACTGTAAAGTAT
CCR875	chr15:70341203-70341243[-]	TGTATAAACCTACAGGGTTGTGAGTCTGAAAAGAGGATCCC
CCR876	chr2:48025885-48025925[+]	GAGAGTGACATTGGTGGCTCTGATGTGGAATTTAAGCCAGA
CCR877	chr12:46246512-46246552[+]	GTTAGAATTGTTACAATCAGTGACCCCAACAATGCTGGCTG
CCR878	chr9:72327758-72327798[-]	TCTTGCTGCTTTGGTCCCTATGGCTCTAGTATGAACATTCT
CCR879	chr17:76988696-76988736[-]	GGAACTGTCAGAAATCCTCATGCCTTTCAAGACTTCTGTGA
CCR880	chr5:31493319-31493359[-]	TATCTTTGAAGGATTTTCTATGTTTGCACATGCCCCCCTGA
CCR881	chr12:27953376-27953416[+]	AGTACGTGGGAAAGGTGGAATGTGCAATAGGAACAGATCTG
CCR882	chr17:30815421-30815461[+]	CCTCTCTGTCATCAACCTCATGAGCTCAAAGATGCTGCAGA
CCR883	chr15:77405859-77405899[-]	AGACCCATTTTCATTGCCATTATCTGTAAGTATGTGCACTG
CCR884	chr16:18804585-18804625[-]	CAAGAGGGAGATAAACAAACTTCTCAAACAAAAAGAAAAGA
CCR885	chr7:99053841-99053881[+]	CTGGCTAGTTTCTGCACCACTGCACTTTCCATCCTGAGCTC
CCR886	chrX:53622285-53622325[-]	GGACTTCTTGTTAAACTTTGTGTGGGATCTCCTGTCCGCCA
CCR887	chrX:48814836-48814876[-]	GTGCCCCGCGCCGGGTTTGTTGGGGGGTACTCGGCAGTGCA
CCR888	chr10:62553947-62553987[+]	ATTTGTTACTATAATAAAACTATAATATTGATGTCAGGAAT
CCR889	chr7:27671992-27672032[-]	AGCTGACAGAATTATTACAATGCTGCCCACCAGTATCAATG
CCR890	chr12:123640131-123640171[-]	AGAACGCAGTGCCCCACATATTCCAGCTCGGTACATGTTGA
CCR891	chr17:80886985-80887025[+]	GCAGCTGTGAGCGCATCATGTGCTGTGTGGCCCAGCAGGCC
CCR892	chr10:116623166-116623206[+]	ATATTACCTCTGAAACCAAATACTCTTTTATCCTTGATTCC
CCR893	chr14:23792642-23792682[+]	AGTCAACCGTGTTACCATACTGTGTGACAAATTTAGTGGCC
CCR894	chr3:127327230-127327270[+]	CTATCAGAACTACCAGCGTATCCGAATCCAGGAGAGTCCAG
CCR895	chr1:202700982-202701022[-]	TGGGACAACAGAACCTCATATTTGCACTCCCCCTTCTCAAC
CCR896	chr7:75677460-75677500[+]	TGCCCCTCCCGCTCCAGCCATGCTCTCCGCCCTCGCCCGGC
CCR897	chr16:15758625-15758665[+]	CTGTTTTCACAATGGAGGACTCCGGAAAGACTTTCAGCTCC
CCR898	chr1:59247177-59247217[-]	TTTTTTAATTTGATGAAAGCTGATTACTGTCAATAAACAGC
CCR899	chr3:98516342-98516382[-]	GTGGAAAGCACATATATTAATGCAGTCATCCCTTTTCAGGT
CCR900	chr22:38273702-38273742[+]	ATGCATGCGCTGCTGGCCATTGCCCTCACGATGTACCCCAT
CCR901	chr11:62609075-62609115[-]	TACTTCCAGGAACGGTGCACTCTCCCTTCGGGGAGAGAACA
CCR902	chr1:203767479-203767519[+]	CCTCAGCACATCTCAAGAGCTGTGTGTAATATATGTAAAAG
CCR903	chr3:150176319-150176359[+]	ACCCAACAGGCCAATCCTGGTAGCACTTCTCAACAGCAAGC
CCR904	chr16:30724885-30724925[+]	CATGGAGCTGTGGTCCTTGATGCACTTTTTGATGCCCCATG
CCR905	chr4:175158327-175158367[-]	TCCTAATTTTGTTTATCACGTTTTGCACAAAGCAGAGCCAC
CCR906	chr10:199687-199727[+]	AACACTTTTATAAACCAAAGTGCCATTTGCATTAGATGGGT
CCR907	chr2:33003011-33003051[+]	AAAGGCATTTCAGCGCTGTGTGACTCTAGAACCCGATGTAA
CCR908	chr11:61563439-61563479[+]	GCCAATCCAGGAATTCCACCTGAGCCGGATTCTGCAGGAGC
CCR909	chr10:18966924-18966964[+]	AAATACAGCATTTTTCTTAATTTTGAGCGTGTCATGTCCTT
CCR910	chr5:153433472-153433512[+]	CTTAGAGCTTTATTAAATTATGCATGCTAAGATTTAAAGGA
CCR911	chr16:2732692-2732732[+]	TCAACGTCGGCGGCACCTACTTCCTCACCACTCGGCAGACC
CCR912	chr5:126172679-126172719[+]	ACATTAACAAATAAAAAAGCTCTTTTAATATTGATATACTG
CCR913	chr2:38525488-38525528[-]	GATGGCAAAAATATCTTCTATGCTGCTCGTACCCCAGCCAC
CCR914	chr1:145508546-145508586[+]	TTCGCAGAATATGGGGAAATTAAAAACATTCATCTCAACCT
CCR915	chr4:39458029-39458069[-]	TTTCTTGGGTGAAAAATATATCCGCAGGGTTCGGATGAGAC
CCR916	chr12:69969924-69969964[+]	GTTGTCTCTGTGGGCACTCTTCCCCAGCACTTTAGCAGTAA
CCR917	chr3:48199872-48199912[-]	TTCTAGGTAGGGTTTTATTATCCCAGGGACTACCTCGGCTT
CCR918	chr14:61445970-61446010[-]	GATTGGACATATTGCACACCTAAACCTTCGAGATCATCAGC
CCR919	chr18:47008464-47008504[-]	GTTAATGTAGCTTTCATTTCTGTTATTGCTGTTTGAATAAT
CCR920	chr12:123639839-123639879[-]	GCAGTTGAACCTTTGCTCCCTACTCTGCAACTTTTGAAGAC
CCR921	chr2:232321340-232321380[-]	AGTTGCAAGGACCCAGGGGATCACCTAATGCCAGAAGCCGT
CCR922	chr10:98721619-98721659[+]	AAAGTCTTTTTTTTTTTTCATCCAGGTGACGTTTTTTATTT
CCR923	chr16:24574568-24574608[+]	CTCAAAGGGAACCTCCTCAATTGCAATTACCGCTCTTATGG
CCR924	chr17:56567997-56568037[-]	CTCTGGGTCACATTGCTTCTTATCCTGAACACTTGACACCT
CCR925	chr13:77595705-77595745[-]	ATCAGCCAGCTACATCTTATTTGAAAGCTACCCATCCAGAG
CCR926	chr6:350715-350755[+]	AGCTTGAATGCTTAAATATGTGCACCTTTACAAACCTCTCA
CCR927	chr3:186505309-186505349[+]	GAGATGTTATCATGAGGGAATTCCGGTCAGGGTCAAGTCGT
CCR928	chr14:67648046-67648086[+]	ACTTGGATTTCCCTTCTTAGTATGCTTCATAACTGCTTTAC
CCR929	chr19:3630713-3630753[-]	GGGCAGTGTCCAAATTCCTGTACTGTAAAGACTAAAAGGCG
CCR930	chr2:200134264-200134304[-]	GATAATTAATTTTTAACTTATGTGCATTGTTAGGCTGTTAG
CCR931	chr5:137274406-137274446[-]	CTTCTGGCACTATTACATAGTAAGCACATGAAGTAGTTTGA
CCR932	chrX:53405970-53406010[-]	CCCTCAGAATATAACCCTCATGCCTGGACCCCTGAGAGCTT
CCR933	chr12:110824231-110824271[-]	ACTAGAGAAAAAATCCTTATTGCGAGATAACGTGGACCTAT
CCR934	chr2:174783426-174783466[-]	AGTGGTGATTCTACCTTGAATACCAATGACCTAACACACTT
CCR935	chr17:79478165-79478205[-]	TGTGAGCTAAAGGTTTCTACTCTTACATCCTCGGTGACACA
CCR936	chr11:105950303-105950343[+]	CATCGAATCCTTACCCGAATTTCAACTTTAACATCTCTCAT
CCR937	chr1:234742747-234742787[-]	AAATGTAGACTTCATAAACATGGCTGTATAATTTTGATTTT
CCR938	chr19:37239253-37239293[-]	AATAATCCAACATCGGCGAATTCACACTGGTGAGAAACCCT
CCR939	chr10:300180-300220[+]	AGTATGTAATATTTAACTGATAGCTGCATGAAAGTGAGATT
CCR940	chr20:61576821-61576861[+]	GTTGTGTGGCTTTTGGGGGATGCGTGTGAGGGGGCTATGTG
CCR941	chr4:76568155-76568195[-]	ATGGTAATATTCTATCCTTATGACACTATTGCAACCAAATT
CCR942	chr8:116424710-116424750[-]	ATGTATTACATTTCAAATAATGGTGCCTGACATATTGAATA
CCR943	chrX:100880468-100880508[+]	ATTGTCGCAAAGATTCTCAATACTCGGGATCCCATAGTTAA
CCR944	chr18:9956353-9956393[+]	TTGTAAGACTACTACCGGCTTACTGTTGAATAGTTTGGTTA
CCR945	chr17:27875631-27875671[+]	ACCCAGAATTCCCCCCAAAGTACGGGTAATTCAACCTGCAC
CCR946	chr6:170627375-170627415[+]	AGGAATGGCATCATATCTTTTACCAGGACAAAAATCTCCAT
CCR947	chr1:179074180-179074220[-]	TGGAGCATACCCCGTCCACATGATGCTTGAACTATGTAACT
CCR948	chr3:48728790-48728830[-]	CAGCTTAAACACTATAACCCTTGGAGCATGAAATGTCACCA
CCR949	chrX:13726847-13726887[+]	GAAGCTTTTGAGATTAACAATGGCAGGAAAATCATCACTTT
CCR950	chr5:93964588-93964628[+]	AAATTACTTTTAAAACTAGATTGCACTTTTATTAAGAGTGA
CCR951	chr2:25166597-25166637[-]	GGTAATTTACATATTTTCTTTCTGTTGAAATAACTGAAAAT
CCR952	chr12:51208086-51208126[+]	TATCAGATCCGAACTACACCTTCAGCTACTTCTCTGCCACA
CCR953	chr1:40706385-40706425[+]	ATATACTGGGGCTTCCTTTTTCAAATTAAGTGTGCATGATT
CCR954	chr2:27550907-27550947[-]	AAACTGTCAACCATCACTACTTGCTCTTTCAAGACACAGAT
CCR955	chr6:131923467-131923507[-]	CTCTCAGGCTTATAACAGCATTAGGTAGCTCAGAGGTACAA
CCR956	chr1:173456911-173456951[+]	AAGAAGAAGCCAAAAAACTTTTCCCGAAAGGAGTCTTCACC
CCR957	chrX:62568558-62568598[-]	ATGTTACCCATTTTCAAATTTCTGAGCCAATATCATGATTT
CCR958	chr16:69724872-69724912[+]	AAGGTAAATATTATCCCTAATGCCCTGATGACTCCACTCAT
CCR959	chr15:58888324-58888364[-]	GACTTCACATAGGAGGCAAATTTAGAGAAAGTTGTAAAGAT
CCR960	chr16:734957-734997[-]	CGACAGGTGGGGCAGTGGGGTCGGGAGGTGGGGCAGGGGCC
CCR961	chr18:46446241-46446281[-]	TGAATGTTTTTCTAAAGGAGTTTATGTTCCATTAAACGATT
CCR962	chr22:21288386-21288426[+]	CAGACCACAACTCCTCTACCTGCAGTTTCCGGTTCTCCTGG
CCR963	chrX:68381984-68382024[-]	ACAGTGATGATTACTACAAATACTGCGACGAAGACTCTGAC
CCR964	chr1:110885509-110885549[+]	AGAGTTCTGTATCCCATATATGCACTTTTGGTTTGTAGCAG
CCR965	chr4:1246209-1246249[+]	AGAATTTTTTAACAATAAAATGACCAGCAAGTAAACTTGAA
CCR966	chr14:29238099-29238139[+]	TTCTAACAAGGTGTGGAGTGTCAGCGAGGTGCAATGTGGGG
CCR967	chr20:18506482-18506522[+]	GGGAGCTACAGAGGGACCCATGGCCAGTAACTCAGGGGAAG
CCR968	chr16:58587686-58587726[-]	CTATCAGTCACTTTATGCAATTTCCACATCATTTACAGGAG
CCR969	chr12:101005812-101005852[+]	ATGCTGCATCAGGTTCATTCTTTGCTCGGGACAATACCGCA
CCR970	chrX:48750963-48751003[-]	CTGCCACCATGGGAGCTACTTCTCGGTTCCCTCCCCGATGG
CCR971	chr2:198288566-198288606[-]	CAGGAAATTTATGGTGGAAGTGACAGCAGATTTGCTGGATA
CCR972	chr1:6283670-6283710[-]	AAATGTTTTTAATACTCAGATGTGGGAGCGACATCAATGAA
CCR973	chr5:31553278-31553318[+]	TTGTTTGTTTGTCTTCACTTTTCCCCCAGGTCTGTTGAGCT
CCR974	chr2:70377445-70377485[-]	CAAAACAAGATAATAATCTTTTGCTGCTTAATTTGCACATC
CCR975	chr1:192779319-192779359[+]	TGAGCTACTTCTTACAAAATTCCTCTACTCCTGGGAAGCCC
CCR976	chr2:38294831-38294871[-]	TTCTGGGGAAACAACATTTATATGTAGCCTTTACTGTTTGA
CCR977	chr11:17135931-17135971[-]	TCAGAAAAATAAATGCCGTCTCCCTCTCAAGCCAAGTCTAG
CCR978	chr20:44511349-44511389[+]	ATTAAGGACTCAAGCCCACCTATGCTGCTGCACCAGGTTAA
CCR979	chr1:155288670-155288710[+]	AGACAGCTTTCTACTCCTTCTACCTTCCTATAGCTGCAGCC
CCR980	chr19:50549061-50549101[+]	CAGGCTACAGACCCCACAAATGTCAGGAATGCGTCAGGAGT
CCR981	chr16:30976750-30976790[+]	CGGGAGTCTCCCAAGGCAAATGGACAGAACCAGGTGAGGTT
CCR982	chr18:5290551-5290591[-]	TTTTAATTTGAGAACTCCTGTGTCCAGTTTAGAAGTGAGAG
CCR983	chr15:44818856-44818896[+]	TTCCTTCTACCTTAATACAATGTTTTGTCTTCCCATTATCC
CCR984	chr2:74441436-74441476[+]	AATGCAATATTTTTAATTTATTCTACTGAAATGGTTTAAAA
CCR985	chr17:903578-903618[+]	AAAAAAAAAGAAAACCAATTTGCTGCCTCTTCTCCCCGTTG
CCR986	chr6:8015513-8015553[-]	GATAATTTCATTCATTTCTATACAGGGTTAACAATAGTTTA
CCR987	chr15:68445984-68446024[+]	GAGGTTACGAGCAAAGGGAATAAGGAATCCGGATCATTCTA
CCR988	chr12:102505929-102505969[-]	TCGAACATTTCACCATGGAGTCAGGGTTGATGGCATAGCTT
CCR989	chr12:57397869-57397909[-]	AATGCAGTAGACATTACCACTGGGACCAACTCCTGTCTGAG
CCR990	chr5:127594009-127594049[-]	TACTGTAGTTATACACCATATGCCTCATTTTATCATAGCCT
CCR991	chr7:99693002-99693042[-]	CCAGTTTGAACCTCTGGACATGAAGCTCATGAGGTAGGAGA
CCR992	chr20:57608819-57608859[-]	GGCAATTAACTACTAAATAATAGCTTTGACATTTGCAATTG
CCR993	chr11:67378885-67378925[+]	GGCGGCTGGGACAACCTCCTTGCTGTGATCCCTGGCGGCTC
CCR994	chr10:18964116-18964156[+]	TGGATGACCTCCCGGATTGGTGTGAGATAACTTTTTTGCTT
CCR995	chr8:28574524-28574564[+]	ATCACCGCTGGTCCATGCCATGTCTGAGCCCAACTTCATGG
CCR996	chr11:64535163-64535203[-]	CCACAGCTTCCCACACCCATTACCCAGCCTGACAGGTGGGC
CCR997	chr19:50436293-50436333[+]	AAGGACCTGCTCATCGAGGTTTACAAGGCCCGGAGCCAGAG
CCR998	chr4:177241290-177241330[+]	GCTCACCTTCGGCTGCTTCATCACCACCGCCTTCAAAGACA
CCR999	chr4:158219468-158219508[-]	TTTTATTCTACTTCTTTCATTGCACATTTACAAAGCACTTT
CCR1000	chrX:153596250-153596290[-]	CGCAGCTGCCCATCACCAACTTCAGCCGGGACTGGCAGAGC
CCR1001	chr17:49245642-49245682[+]	AAAGACCGACCATTCTTCCCTGGGCTGGTGAAGTACATGAA
CCR1002	chrX:54839918-54839958[+]	CAGGATACATCATTCACTCTTTGGGGACGTGAAGAAGCTCA
CCR1003	chr7:5269295-5269335[+]	GCCCCTTAGTCACTCAGACATACGGCGCAGCTGCAGGAAAA
CCR1004	chr3:41277837-41277877[+]	TAGCTGCTTTATTCTCCCATTGAAAACATCCAAAGAGTAGC
CCR1005	chrX:41082542-41082582[+]	GTCCAGGTCCTCCAATCAAATACCAGTATGCTGAATTAGGC
CCR1006	chr19:37005162-37005202[-]	CTCTCGAATCACATCACTTATTGTACATGTGAGAATTCATA
CCR1007	chr16:71885862-71885902[+]	AGGCAGGATCTGTTGTTCATTACCCCATGGCATCCTTTCAG
CCR1008	chr14:56766848-56766888[+]	AATAGAGAACATATTTATCATTCCTCGATAGTTAATTATAG
CCR1009	chr1:35649864-35649904[-]	AAATTATGTAATGCAGTGTTTGGAACAGGAGAATTTTTTTT
CCR1010	chr2:198358138-198358178[-]	AGTGAAAAGAAAATTTCTAGTATCCAGTCCATTGTACCTGC
CCR1011	chr15:66181473-66181513[+]	TGCAGTGATACTATTCAGGATGGTGGGAAATCCCCAAAAAT
CCR1012	chr5:134195280-134195320[+]	GAATAGATACTGTGTATGTTTTTATGTCCATGAACTTGAGC
CCR1013	chr13:32907088-32907128[+]	TTCTCCAGTGGCTTCTTCATTTCAGGGTATCAAAAAGTCTA
CCR1014	chr7:107401470-107401510[+]	TGGTGAGTGCTTCTATCATATTACTGTAGGTACTTGGACTG
CCR1015	chr15:73852376-73852416[-]	TGCAATGATGTATAAAAAAGTGGATTCACCTGTTTTTAAAA
CCR1016	chr7:129472949-129472989[-]	CTTTATGTTAATTACGGGCATGAAGCAAAAGGTTTTCTTTA
CCR1017	chr5:151183681-151183721[+]	AAACCCTGGTTCCAACAGAATGGTGAATTTTCGACAGCCTT
CCR1018	chr13:79213031-79213071[-]	ACAGATAATCCAAGTAAAATTAACCCAGAAACTGTAGCAGA
CCR1019	chr5:33458728-33458768[+]	AAAGGAGCCTACATTTATAATGCACTTATTGAATTCATTAG
CCR1020	chr10:11502842-11502882[-]	CATTGAAACGCAAACAAAATTCTGGTGAAATAACTGGGCTG
CCR1021	chr1:202911284-202911324[-]	GAGTGGCGTCGTGCCCACCATGCACTTTACTATCGCTGAGG
CCR1022	chr4:160280591-160280631[+]	AGCTGCTATTAACCCTATAATGACTGAAATGACCCCTCCAC
CCR1023	chr12:58220154-58220194[-]	GCCTTCCAGCCAATCAACAATGCTGACTTCATAGTGCCTAT
CCR1024	chr10:27459371-27459411[+]	GTGCACAAAAGTCAACAAAATGACTGTGCTAATAAGGAGAA
CCR1025	chr1:145442531-145442571[+]	GTATGGTAAAGACTATATTTTGTACTTAACCAGATATATTT
CCR1026	chr8:28573139-28573179[+]	TTTATTTCTGTTCTAACCTATTACTGTATAACTGTGAATAG
CCR1027	chr12:112466226-112466266[-]	CTTAGAGAATTATAACAGGATGGTGTTTACTTTGTTCACCT
CCR1028	chr7:137565096-137565136[-]	ACTGGATCTTCATGGAGACATGGGCAAGCATTAGTGGCTTC
CCR1029	chr6:64394317-64394357[+]	GATGGATTAGATTCTAAGCATAAGTGTAATAATCCGGGAGA
CCR1030	chr5:157162884-157162924[+]	TCTGGGCACTTATACAACAATCTGGACTAACACCAGTACAA
CCR1031	chr9:133512917-133512957[+]	TTAAAAAAACTGAACTATTATGTATTGTAATGAATGATGTG
CCR1032	chr17:37330992-37331032[-]	AGGCCACAGATTCTTTCCCATGGGGGCTCTCTTCCCCAGAC
CCR1033	chr3:53262108-53262148[-]	GGATGACCAGGTGACCGTTATCGGGGCTGGGGTGACCCTGC
CCR1034	chr2:176960508-176960548[+]	ATAAATAATTACTTTTAAAGTGCTGCATATTTATACAATTG
CCR1035	chr19:14070473-14070513[+]	GACTGCTGTCCAGGTGGGTGTGGGCAGTGGGCGGGCCAAGG
CCR1036	chr10:27423772-27423812[-]	TGGTTTTGCGGAAGGTTTTCTGAAAGCTCAAGCACTCACAC
CCR1037	chr18:66343704-66343744[-]	AAAATTAAGTCTTTAAAATTTAGGCACTTTAAGGAGAACTA
CCR1038	chr11:126147334-126147374[+]	AGAGCGCCTGGGCCGGCTATTACGACTACAACACCTTTGAC
CCR1039	chr2:65315698-65315738[-]	AGCTGAGATTAAAAAGCGAATGGGTCCCGGAGCAACAGCTG
CCR1040	chr21:34107216-34107256[-]	ATGAGACTGAAAAACCTATTTGCTTGATTACCATTCCCAAT
CCR1041	chr9:112003186-112003226[-]	CAGTCGTACTAATCTTAAATTGCATAGCATTTGTTTTGATC
CCR1042	chr5:122682028-122682068[-]	ATTTGATCTTATTTACTTTATGCTACCTCTCCCACACTGGT
CCR1043	chr2:26358233-26358273[+]	AGTTAGAATTAACAATTTTATTTTGTACAACAGTGGAATTT
CCR1044	chr17:1585520-1585560[-]	CCTCAAACTCCTGGAGAACATGCCTATGCCTTGGGAGCAGA
CCR1045	chr6:111620548-111620588[-]	TTTAGCTATTAATGGGGCATTGTGAGGAACTGTGCAAAGAC
CCR1046	chr12:6859891-6859931[-]	CGGGTGGTTTCATGGACATGTTTGGGATGATGAATGACATG
CCR1047	chr16:23079364-23079404[-]	TGCAAACCTCTGCACGGCCTTCTCAAAAACCTCAGTGATAT
CCR1048	chr4:79837072-79837112[+]	TAATTGCTGGCAAACAGCTTTAAGTGCACTTTCTTTGATTA
CCR1049	chr3:32938241-32938281[+]	TTTTAATGATTGTATTAACTTACAAGCTCAGGTAGTATTTT
CCR1050	chr12:27066966-27067006[-]	TAAACTGTCAAAAAACAATATACAACTTAGTTGATATGGAA
CCR1051	chr10:89313002-89313042[+]	TTGGCTTCGATTTTTATATTTTCCTATTATATGAAATGTAT
CCR1052	chr3:183397141-183397181[+]	GGAACTTCACATATCTCCTTTGTGCCATATGCAAAAAATAG
CCR1053	chr17:36922991-36923031[-]	CGGCTTGGGGTCACAGGGCATGCCGGGAAGCCACAGCTGAG
CCR1054	chr1:156106751-156106791[+]	GGAGATGATCCCTTGCTGACTTACCGGTTCCCACCAAAGTT
CCR1055	chr19:36633560-36633600[+]	CGCACACATTACTCCAACATTGAGGCCAACGAGAGTGAGGA
CCR1056	chr7:140402767-140402807[+]	TCTGGATTCTCTGGCGCTTTTGGCATGACTCAGAAGAGGTG
CCR1057	chr11:46698649-46698689[-]	ACCAATCATGTATTTCACCGTTTGCACTTTTTGTATTTCAA
CCR1058	chr9:140086621-140086661[-]	GCCCATGTGTCCACATTCTGTCCTCTCACTTTCAGCTCACA
CCR1059	chr19:44079635-44079675[-]	TCCCTGCCCCTCGGACCCCATACTCTACCTCATCCTTCTGG
CCR1060	chr12:52452631-52452671[+]	CCCAGGGCCTGCAGCGCATCTTCTACCTCAAGCTGGAGGAC
CCR1061	chrX:153670820-153670860[+]	GATACCTGTCTGACTCACCCTGGGCGCTGGGCTCTGGCTGT
CCR1062	chr2:232323299-232323339[-]	TACTCTAGGTTGAACTCCAGTGTACCTAACAGAGAGTTTGA
CCR1063	chr2:242447411-242447451[-]	CATGGCTCACCTCCGGGGATTTGCCAACCAGGTGAGAAGGG
CCR1064	chr12:4668787-4668827[+]	TGAAATGCCCTTTTTCTTGATACCACTCATCCACGTGTTCC
CCR1065	chr6:30297334-30297374[+]	TAATCGGCAACTAGGCAGTATGGTGGAAATTGCCAAGCAGC
CCR1066	chr16:46617952-46617992[-]	ATAGAAATCTACCCTGGGAGTCAGTGCACCCTGAGTGACAA
CCR1067	chr2:113288416-113288456[+]	GTTATGCCTCATTCCTCATGTGGCTTCCAATAAGTATCTTA
CCR1068	chr12:76741476-76741516[-]	AAAAACATTTATTATCTTTCTTTGCCATTTGCTTAGAGGAC
CCR1069	chr1:157095158-157095198[-]	TCATGGTTCCACCACTGCAGTGCCAAATGCATCCTGAGGAG
CCR1070	chr12:56598461-56598501[-]	TACTCTGGTTACTACATTTCTTCCACTCCCCTTTCCCCTAC
CCR1071	chr19:56207087-56207127[+]	GATTTTGGCAACTTTGGGAATAAATGGCAATTCCCACGGGC
CCR1072	chr1:59120512-59120552[-]	TTCCTCAAAAATGACAGAACTCTCCATACTTAATTGTGACA
CCR1073	chr4:187524528-187524568[-]	TCAGATCTCAACAAAACAACTTCTGCACAAGATTAACTCTT
CCR1074	chr5:68661164-68661204[-]	TGCTTAACAGCTCCAAACTATAGGCTGAAATCTTTACAGAA
CCR1075	chr1:95363124-95363164[-]	CGTACATTCCTTTTTCCTTTTTCTGCCTCTTCCCTCAATAG
CCR1076	chr8:64100096-64100136[+]	AGATGTTCCCAATAACCAATTACGGCATATTCGCTTAGAAA
CCR1077	chr15:65551800-65551840[-]	ACCGTCATGATATCCCTGTATCTGCTGCTGCTGCTCATAGT
CCR1078	chr14:50089744-50089784[+]	CAAACCCAGTTTCACTCTCTTGACACACTTATTAGGAAGGG
CCR1079	chr11:32999176-32999216[+]	TTTATACACACTATTGTAGCTTTCTTAGGTTTGATAGGTAG
CCR1080	chr10:126674718-126674758[+]	CACTTCAGGTATACATTCAATACTGGGTAAAAATTTCAGAC
CCR1081	chr2:121052236-121052276[+]	CTCCCAAAGAATCATGGGCTTTTTTTTTGAATAAAAAAGCA
CCR1082	chr1:113240619-113240659[+]	TCATCCCACCATCCTGGACATTCCTAACCAGCTCTATTATG
CCR1083	chr19:19136134-19136174[-]	TTGGGATAGAAATAATCAAATGGGCAGGATTCCACACCATA
CCR1084	chr11:92379073-92379113[+]	AAGTGAATGGGTAAATGAAGTAAAATACATGATTTAGATTT
CCR1085	chr15:70347039-70347079[-]	CTGGTGCCCAGGAGGGGAAGTAGGCAGCACTCAGCCCTGCC
CCR1086	chr15:60741532-60741572[-]	ATAGATATATTACATGCTGATGGTGAAAGACCTAATGTTCT
CCR1087	chr15:40756687-40756727[+]	CTCCTGTGGTATTACAGACCTGAGCACTTACAGGGAGGCCG
CCR1088	chr1:155408497-155408537[-]	GCAACGCCAAGCTCGGAAAATGTGCAATTACGACAAAATCT
CCR1089	chr3:128350833-128350873[-]	GAGCTGTGCTTAAGGGGCCTTTCTCACGCTATGATTACCAG
CCR1090	chr3:119562134-119562174[-]	ACCATCCTTATTCCTCCTCATGCTCGGATTCAAGCAGCTGC
CCR1091	chr14:34903578-34903618[-]	CCGAGGGTCACTATTAACAATGTACTTCCTTAAATTTAGTT
CCR1092	chrX:153199847-153199887[-]	CCTGCCCGAGAACTACCAGATGAAATACTACTTCTACCATG
CCR1093	chr7:45023563-45023603[-]	TGACAGCCACCTCTCACCAGTGGCTTCACTCTGTGTCCCTG
CCR1094	chr6:87969218-87969258[+]	ATTTACAAGAAATTCTAACCTCCGGGCACACTGTCAGTTGG
CCR1095	chr14:77809791-77809831[-]	TTCAGTCTCCCCACCTCTGATGGCTCCTCCATGCATCTGGA
CCR1096	chr7:97822176-97822216[+]	GTGACACTTTGAGCACCTCATTGCAGTCTTCCCCGGAAGTG
CCR1097	chr19:58197881-58197921[+]	GCTTCTGAGCAGAGTGTATCTATACAGGTCAGGACTTCTAA
CCR1098	chr1:28218197-28218237[-]	GTGTGGCATTACTTTCAGAATTGCACTTTCCTGCTTGTCAT
CCR1099	chr7:156752640-156752680[+]	CATTGCCCATTTATACAACTTCCACGTGGTACAGTCTCTCC
CCR1100	chr3:184085927-184085967[+]	AGTGCTCCAGAATCACGGGATGGGGCCTTCTGTTTCAGCTC
CCR1101	chr4:2232917-2232957[-]	TGTTTGACTGTCAAATAAAATTCTGCTGCTCAAATTGTATT
CCR1102	chr12:109495878-109495918[+]	AGTATTTATCCTTAACACTCTTGCACCTTCTGAAAGGTATC
CCR1103	chr11:6703431-6703471[-]	CCTCGCAGAGACAGCCACCTTACACTCCTAAACCAGCTGCT
CCR1104	chr3:14154645-14154685[-]	TGCCAAATGGAAACATTAACTGGAACTGCCCATGCCTTGGG
CCR1105	chr10:63852696-63852736[+]	GCATAACAGCATTTACCCTTTAGCTGCTATAAATCCTCAAG
CCR1106	chr17:7481099-7481139[+]	ACCCAGGTGCCTACCTGGTCTGCTGCATATTTGTTTTCTCT
CCR1107	chr1:226108960-226109000[-]	GGGAGCCACCATCCACGCCCTGCACTTTCTAGAGAGTGGGG
CCR1108	chr19:9958742-9958782[+]	TTGAGTCTCTGGCCTCACAGTTCAGCGACTGCAGCTCAGCC
CCR1109	chr20:31023902-31023942[+]	CATGTCAGAATCCCCACAAGTACCACTTACAAAAGACCAGA
CCR1110	chr3:47890201-47890241[+]	TGTTGGCTGCCATCTTCCGTTGCCTGCACCCACTACTGGTG
CCR1111	chr16:31135192-31135232[+]	TAAGATTAATTCCTCAACTGTTTTGCACTCAACAAAGACAT
CCR1112	chr10:65380917-65380957[+]	GATGAAACACAAATCCACAGTATACTTGAAAGGAGCCTTTT
CCR1113	chrX:152861502-152861542[-]	TGCCATGTCTTCAATTTACTTGGCCGGCAAAGTGGAAGAGC
CCR1114	chr1:193044950-193044990[+]	GACTTGCAATTGTGACCAAATATATTACAAAGGGCTGGAAA
CCR1115	chr3:58309414-58309454[+]	ATGACTAAAATAGGCCAAGTTGACCGAGCACTTTGTACATA
CCR1116	chr14:99639556-99639596[-]	TGGTGTGCCCTGGGGTGCCATGGCTGCTATTCGCTGTAGAT
CCR1117	chr12:50480401-50480441[+]	CAGTGCAAAGAAAAAGAAGATGGCTGACAAAATTCTACCTC
CCR1118	chr10:75006218-75006258[-]	TTGCACTGAAAAGGGCCGATTTATTTTTTTTGCCGGATGCG
CCR1119	chr8:64099940-64099980[+]	GAAAGGCCCACTCTATTTACTCTTCAGTGTGAATGGCAGTG
CCR1120	chr5:139928526-139928566[+]	GAGTGCAAGAACTCACCCATTGCCCGGACACCCCCCTGCTG
CCR1121	chr2:219513745-219513785[-]	GCCATTACCCCTTCGCTGCTTTCAGGAGGGCTGCAGCTATG
CCR1122	chr12:110922936-110922976[+]	TTATGGAAAACTCCCCAAAATCAAACAATCCACCTCTCTAA
CCR1123	chr20:461953-461993[-]	TGAAAGGTTATGTTGGCAATTACTCTGAAAGATTTTTTAAA
CCR1124	chrX:24024149-24024189[-]	GATAGAAGACGCTGGAGACATACCGATACCATCATTCAGAA
CCR1125	chr1:224577281-224577321[-]	CATGTTGAATTATTCCCCCATCGGTTGTGAAGAACTGTGCT
CCR1126	chr3:135870422-135870462[-]	TCTAAAACCAAGCCAGGTATTCTTAAAAAAGACAAAGCAGT
CCR1127	chr10:81056310-81056350[+]	GGCCACTCACCTCCCCCAACTACCCAGGACAGAGGATGCCC
CCR1128	chr20:57688269-57688309[+]	TGGCCACACCATGGTCCACCTCACTACTCCCCTCTGCAAGG
CCR1129	chr17:61667079-61667119[+]	GTCTTATAGTCCTCCCTCTTTGCACCTTCTTCTCTTCCCTC
CCR1130	chr6:41899230-41899270[+]	ACTCAACTTCCATCTCTACATGGCTCTCAAGAAGGCCCTTT
CCR1131	chr3:186288700-186288740[+]	ACCTGAGCACCTTTTGCCTGTTGCTGCTATACCTCATCGGG
CCR1132	chr20:10394212-10394252[-]	TTTTTAATGTTAAAACGTGATAATGCAATAAATAGAAAAAT
CCR1133	chr1:31404574-31404614[-]	TTTGTCTACTTGTAAGTGAATGTAACATACTGTCAATTTTC
CCR1134	chr1:28162609-28162649[+]	CTAACTTGACTATACTCTACTCAGCTTTATGCTATATTTTC
CCR1135	chr19:45650470-45650510[+]	GAGGGCTGGGGCTACTCCTGTCGGTGCAACTCTGTTCACAC
CCR1136	chr10:70737303-70737343[+]	TCCCACTGCCATTAGTCACTTCAAACAATCAGCTGAGAAGC
CCR1137	chr1:145442153-145442193[+]	AATTATATAATTCTAACGCTTAAATCATGTGAAAGGGTTGC
CCR1138	chr21:44269330-44269370[-]	TGTTTAGCAGCAACCGAATATACCAGGCAAAACTCCTTGGT
CCR1139	chr2:3652499-3652539[+]	AAAAATTAAAAAATCCCTGGTGGTCTAGTGGTTAGGGGAAA
CCR1140	chr3:49775787-49775827[-]	CAGTGATGGTTACATCAACTTAGTGGCCTATCCTTATGTGG
CCR1141	chr8:81888667-81888707[-]	TGACACAAACCTATACTTCATATGCTGCTTTAGTCACCTGA
CCR1142	chr1:211919366-211919406[-]	TATTTGAAAAGAAAATGTTTTATTTGCACTACTGAGTAGGA
CCR1143	chr1:165632115-165632155[-]	TGTTACTCTTTCTCTCTCCATCAGCTTCCTCACTGAAAATG
CCR1144	chr17:18145225-18145265[+]	TTTGAACGCTTCTCCCTAAGTGCCCGGAACATCACAGAGCC
CCR1145	chr1:109242973-109243013[+]	AACTGCCACTAATCTATTTTTGTTTTGTAGGTGTGGGATTA
CCR1146	chr3:137600009-137600049[+]	AAGGAATCAACTTCTACACCTCCATTACCCATGCCCGATTT
CCR1147	chr14:61446065-61446105[-]	TACAATTTGGAACTAACATATGAACACTTTAAGTCAGAAGA
CCR1148	chr15:77241941-77241981[+]	TGTTCTAAGTAGATTTAATTTGGGAACTGACAGGACAATGT
CCR1149	chr10:75881715-75881755[-]	TCCCTAATCTCAACAATCTATACCTGGACTGTCCAGTTCTC
CCR1150	chr9:139297131-139297171[-]	TGCAGTTGTGTCCTTAAATATGCAGTCTTCACCCAGAGTAA
CCR1151	chr5:173386512-173386552[+]	GTGGCAAGTTAACTTCAAGTTATGTGCAATACTTATTTCAA
CCR1152	chr10:119043002-119043042[-]	AGGAAAAAATCACTTCTTTCTGCTGCCTTAGCTAAATCAGG
CCR1153	chr1:45233306-45233346[+]	TTCTGAGACCTCTTTCTACTTTACTGTCTCCCTAGAGATCC
CCR1154	chr6:31525399-31525439[+]	CAACAGCCTACACCGATTTCTTCCTCCCGCTGCTAAGCCGC
CCR1155	chr6:26157180-26157220[+]	CCAGCGAAGGCCAAAGCAGTTAAACCCAAGGCGGCTAAACC
CCR1156	chr2:197002184-197002224[-]	TTCGATGACTCATTACCCAATCCCCATGAACTTGTTTCAGA
CCR1157	chr17:42882884-42882924[-]	TCTGTGATGTACCTGGGCTATGCTATCCACAAGATTGCCAA
CCR1158	chr8:141531206-141531246[-]	GAGGACTTTGGGGCAGGTGATTAAATTTATATAGGTACCTC
CCR1159	chr11:119003855-119003895[+]	ACGGGGCAACAACCTCACCGTGCACCTTCGCAAGAAGCACC
CCR1160	chr6:21597232-21597272[+]	AGATTTTTTTCTTCTCTTAATCGGAATCGTGATGGTGTTGG
CCR1161	chr1:146627959-146627999[-]	AAAAGTGTCAATATTCCATGTATGCTGCTGAAATGAAGTTA
CCR1162	chr12:42719844-42719884[-]	AGAAGCACCGTGGCTGCTATTATCTGCTCTCCGCGCCTGAC
CCR1163	chr17:40010914-40010954[-]	AATCTGCCACATATTCATAATCACCTCGATGGACATGCTGT
CCR1164	chr16:50069482-50069522[+]	AACTGACAAGAAGTGTGCAATATTTACCTGGATTATCTTGA
CCR1165	chr12:132210142-132210182[+]	GTCCTGGCAGAAAACAAAAGTGACGAGAAAAAAAGTAGGTC
CCR1166	chrX:154005245-154005285[+]	TGAAGAGTTCTGGCACATTTTAGCTGCTACTTTGAGACCTC
CCR1167	chr1:173769509-173769549[-]	CTTATTGATAACTTGCCTAATTGCTATGCTGAAAGAGACTG
CCR1168	chr8:92217720-92217760[+]	TGAACTAGCTCTGTGGATCCTGACAGACAGCCTGATAGACA
CCR1169	chr11:4156312-4156352[+]	AGCATACCAGAAATTCCTGATGACCTGAAGCAACTTTATAA
CCR1170	chr17:41002123-41002163[+]	AGCTTCCTGCACATTCCCCATGCCGAGGACATCCCAAACAC
CCR1171	chr9:132395064-132395104[+]	GACGGCATGCTTGGGGGGTATGGCCACATCTCCAGCATCGA
CCR1172	chr1:36499791-36499831[+]	AGGAGACACACTTTTGGGTATGGCTACACAATGTGTTCAAG
CCR1173	chr12:57627606-57627646[+]	CTAGAGCTTGTATCCATCACTGCCAACAAGAACACCTGTCC
CCR1174	chr21:43406939-43406979[-]	ATGATTGGAGTCAATAAATTTGTACTGTATTTTGCTTCGAG
CCR1175	chr1:23857143-23857183[-]	CCCCAGCTCTGCCCAGCTACTGCTACCTACTACACACCGCT
CCR1176	chr3:182567850-182567890[+]	ATCAGAAACAACGGAGGACATTGGGGAAAGGACATCCTCTT
CCR1177	chr2:61719156-61719196[-]	ATTATTTGTGATCTTCAGCCTCAACAGGTATGTTAAGCACT
CCR1178	chr16:74678467-74678507[-]	TGTGGGCATCTCTTTGGGTATAGGTGCATTTCCACGTGGCT
CCR1179	chr5:150868185-150868225[+]	CCTCATGTTTTCACCTTTTCTGGGCCAGGCATAGATTAAGT
CCR1180	chr11:118376565-118376605[+]	TCAACAATAAGCCAGGATACTAGCCACCTCACATCAGGGTC
CCR1181	chr17:38286204-38286244[+]	AAATGCATAGAACTATACTTTGCCATGCACGACTGTTCCTG
CCR1182	chr18:55150270-55150310[+]	GATTGATGACTTCGGTTGAATAGCTTTATTCTGGATTTTTC
CCR1183	chr1:212236245-212236285[+]	AAGAGATGGCAACATTATGGTCTGGGATACCAGGTGCAACA
CCR1184	chr19:34306534-34306574[+]	TCCCGCTCACAGGGGCCCAATGCCAGGTCACAACACTAAGA
CCR1185	chr6:166733605-166733645[-]	TGCTTTTCCCCATAAAACACTCCAGGAACAACTGACGTGAC
CCR1186	chr11:43364096-43364136[+]	TTAATATACTTAAATTCTACTACTCATTGGATTGCCGGGGA
CCR1187	chr1:203277121-203277161[+]	GCCTCTCCTGATTCCTACTGTCCTAAGCTGCTTTTCTTGAA
CCR1188	chrX:107331286-107331326[-]	GGTTGGTCTCCTCTTCATATTGCGGCTTCTGCTGGCCGGGA
CCR1189	chr22:22142586-22142626[-]	AAGCTAGGAACTATTTGCTTTCTCTTCCACACAAAAATAAG
CCR1190	chr17:40176292-40176332[+]	CAGCGACACACACACACTTATGGCACCAGCCTGGACTCCAG
CCR1191	chr1:231469667-231469707[-]	TCCATAAGCACCAAATTTGATGCCCATGATTTCAAAAGGTC
CCR1192	chr5:135508162-135508202[+]	GTTCAATAGTCTACTATGAATTAAACAATCGTGTTGGAGAA
CCR1193	chr21:34941366-34941406[+]	TACTGGTGCCCAAGCCTGGATTAAAAAGGTACACAGTATAT
CCR1194	chr2:74058152-74058192[+]	GAACATGCCTTCATCCTCTATAACAAGTATATCACGTAAGA
CCR1195	chrX:153590074-153590114[-]	CCCTAAGAGCCCTTTCTCAGTGGCAGTATCTCCAAGCCTGG
CCR1196	chr17:647821-647861[-]	CTCACTTTGTCTCTTCTAAGTCGGCCTCAGCAATAGCCCAG
CCR1197	chr8:75157023-75157063[-]	CACCACATCCCCAACCCCAGTAACGGGGAGCTGCATTCTCA
CCR1198	chr17:27232799-27232839[-]	CAGAAACTTGTTCTATTTTGTGGCAGTGACAATAGTTTTAT
CCR1199	chr7:72892361-72892401[-]	TCTAGTAAACCTCATAAACATCTGCCTCCTGCAGCCCTACA
CCR1200	chr10:98718194-98718234[+]	ATGGTGTGCCTACCCTTTAATGCTGCAGTTTAAGAGAACTT
CCR1201	chr3:19992409-19992449[+]	ACAAGACCCAACGGGCCAAATACGGGAAATAAAATATGCCA
CCR1202	chr17:10596188-10596228[-]	CCGTTTTCCCTCACAACTCATACTGGGGAGCGTAAAACTGA
CCR1203	chr20:43708334-43708374[+]	TTTAACTTTTTGTAAGAAAATCTAATAACACTGGCTTAAGT
CCR1204	chr20:61537410-61537450[-]	AGGTATTAAAATCTCTTCTGTGCACAAGAGACCAGCTCCAG
CCR1205	chr19:57723267-57723307[+]	TTCAACCGCAAGTCATACCTTACCCAGCACCAGCGGATTCA
CCR1206	chr20:47679842-47679882[+]	AGTAACATTCAAAAACTATATTAAAAGGAACTGGAGAATTG
CCR1207	chr9:127920591-127920631[-]	TTGGAGACCTTCACTTACCTTCTTGCATTAAAGGCTAAATG
CCR1208	chr2:231663509-231663549[+]	CACTTGCAAAAATCATTTTGTGGTCGGAACAGTTTTATGAT
CCR1209	chr5:153435738-153435778[+]	GATACTGTATAGTAACTAAATGCATGCTACTCCGTTGTATC
CCR1210	chr1:160328633-160328673[+]	TTGTACTTTTTATTAAGCTGTAATATCTATTTTTGTTTTTG
CCR1211	chr19:1257530-1257570[+]	CCTCCTCCGTCTGTCTCCTTTCACCTCTGCGCCAGGTCGGT
CCR1212	chr16:46836060-46836100[-]	TATATTTATTACATGCAAAATATTTCTTAGCCACTTTTAAG
CCR1213	chr19:32845097-32845137[+]	TGATCATAGGCTGGAGCAGTTCAGAGAAAAAAGACGAGTTA
CCR1214	chr12:108102748-108102788[+]	GATAAGCCAATTTTTACACTTAATGCACACAATGATGAAAT
CCR1215	chr21:45402637-45402677[+]	ACCTGGCCCCTCACCTCTTCTGCACCCCCCGCCCCCGAAAC
CCR1216	chr1:47143735-47143775[-]	CACTTAAATTTGCCTTAAATTAGCTGCACTTTATAGAGACT
CCR1217	chr6:7287828-7287868[-]	GATCTTGTGTATCAAACCTATCCCCGGATGTGTGAGAATAA
CCR1218	chr6:11111914-11111954[+]	AGGGAAGGTATCCGAGTCACTGCACCATTTGAGAGATCCAA
CCR1219	chr17:40715052-40715092[+]	ACCAGCTGTTACAGCTGTTGTCCGCGACTGGCCTCGGTGCT
CCR1220	chr3:41266615-41266655[+]	AACTTGATTAACTATCAAGATGATGCAGAACTTGCCACACG
CCR1221	chr1:227174988-227175028[+]	TCTCACCTTTGACAGCTGAATGTTCCTAAAGAACTGCTGCC
CCR1222	chr20:60710189-60710229[+]	TCAGAACTTTAGTATACGCATGCGTCCTCTGAGTGACAGGG
CCR1223	chr10:30301829-30301869[-]	AAATGCCGGCAAAGCACAGATGAATGTCTTCAAGAAGCTCT
CCR1224	chr5:61682021-61682061[+]	ATCATTGAACGGAACTAAAGTCTGTGACAGTGGATATAGCT
CCR1225	chr21:30434816-30434856[-]	CCGAAGACTTTGTAAAACTGTTGGTGCTACAGCTCTTCCTA
CCR1226	chr10:5788294-5788334[+]	CACTGTTACTCAAGCCACATTCACCAGGACTTACGATGGGC
CCR1227	chr1:113244010-113244050[-]	CCCTCCTGCCCAGGACTGCATTGTTTTCTAGCCCCGAGGTG
CCR1228	chr10:28822486-28822526[+]	ACACACTCACAGGCCGGGCATTGATGGTAATGTATGCGAGG
CCR1229	chr7:150915166-150915206[-]	AGCAGGGAAGTCAACTCTTCTGAAGCTGCTAACTGGAGAGG
CCR1230	chr19:58152988-58153028[+]	TAGCCAAAACTTTAGCCTGATCTACCACCAGAGAGTTCACA
CCR1231	chr10:28971559-28971599[+]	GTACACACTGTCACCAGGGTTATTTGCATCCAAGGGAGCTG
CCR1232	chr3:73117020-73117060[+]	AATGACATCACTTAACTCTATGAGAGATCTGCATTTTAATC
CCR1233	chr5:138661411-138661451[+]	TTTAAAATAAGATTTTAAAGTTGGTCTTACATAAGCTGTGA
CCR1234	chr1:244219825-244219865[+]	GGTGTACACATTTACCCAGTTGAGCGTTCTTAGAATAACTA
CCR1235	chr8:144734515-144734555[+]	TAGCACAGGGCAATAAAAAATACACCCCTAAATCTATGTGT
CCR1236	chr7:66452822-66452862[-]	AAACAGATATAGAAAAATTGTGCCGGACTTACCTTTCATTG
CCR1237	chr2:145161532-145161572[-]	AACTTTTCCTGCCCTCTCTGTAGCTACACGTTTGCCTACCG
CCR1238	chr15:75219156-75219196[-]	CCAGAGCCCAAAATCATTGATGCTGCTTTGCGGGCATGCAG
CCR1239	chr3:9427585-9427625[+]	GTTTTGTGGAAAATGGTGCTTCCCTGGAACAAAGAGTAGTT
CCR1240	chr2:24222784-24222824[+]	AGTGGACATGCAAACCAAAATTGGGGATTGGAGAAGTCAGA
CCR1241	chr11:65049150-65049190[+]	ATGGAAGGAATCAACACCACTGGTAGGAAACTTGTTGCCAC
CCR1242	chr17:27613218-27613258[-]	CTAGTGAGAGTGGAGCCTTATCCTTGGAACCCAGTCATATA
CCR1243	chr20:49366438-49366478[+]	AGTGTCAGGGTAACACCACATGGCTTAGAAAAGGTTCCAGG
CCR1244	chr8:94744510-94744550[-]	TTGATTTTCTATACCCACAATAATATTTATGGCTAACATTT
CCR1245	chr6:26157277-26157317[+]	AGAAAGTTCCTTTGGCCAACTGCTTAGAAGCCCAACACAAC
CCR1246	chr20:61510238-61510278[-]	TTCGTTGGACCCTAGAGCCATACCTTCACTGACATCTCATC
CCR1247	chr1:151149265-151149305[-]	CCTGTTACAGACATACCCTATGCCACTGCTCGAGCCTTCAA
CCR1248	chr5:82352009-82352049[-]	AACTGTATTTTTGTTTTGTTTTTTAACACAGCACTTTAAAT
CCR1249	chr13:58874355-58874395[-]	ACATCAAATTCAGTGGGATTTTTTGATTCTTCATCTTTCTT
CCR1250	chr11:85372834-85372874[-]	TATTTCTTTGTATATAATTTTGTGCAGTACCAATGACAAAA
CCR1251	chr14:77270209-77270249[-]	GGACAGGAAGACTTCTCCCATCAGCTTTACCAGAGGAAGCT
CCR1252	chr5:60831371-60831411[+]	TTGCCAAGTATCTCTTCACCTCTCTCCTACCTCACGATGCT
CCR1253	chr19:1435285-1435325[+]	TGAGATTTTTAAGAGAAATTTTCTACGATGTATACTGGCTT
CCR1254	chr6:52866482-52866522[-]	TTTTACGATTTCCAAACAAATGTACTGTACTGTTATATAAT
CCR1255	chr10:115596873-115596913[-]	TGGCATTTCGACCTACAGGATGGACACACTCTAACAAGTTC
CCR1256	chr9:33113300-33113340[-]	CCCTTCGCTCATCATTCAGATGGCTTTCCAGATGACCAGGA
CCR1257	chr12:49332809-49332849[-]	CTGGGCCTGCATTCCCTTCGTCACCGTAACTGGTACATTCA
CCR1258	chr1:160001398-160001438[-]	CCCTGGTTTTCTATGGCGTCTTCCAGGACCGGACCCTGCAC
CCR1259	chr6:74229056-74229096[-]	AGACTTTATCAAAAACATGATTACAGGGACATCTCAGGTTG
CCR1260	chr12:1604876-1604916[+]	TAGCAGCCTCCATGGTGGTGTCTGGGATGCACGTGCACCCG
CCR1261	chr22:39262280-39262320[-]	TGACGGTCACAATCAAGGAATTCTGCAACCCTGAGGATTTC
CCR1262	chr6:33288525-33288565[-]	CCTCGATCTCATCTACAACTTTGGCTGCCACCTCACAGATG
CCR1263	chr2:74275021-74275061[+]	CCCAGAACCTTCTCTTGCGCTATTTGCACCTAGTCCCTCCA
CCR1264	chr2:152658968-152659008[-]	AGTATTACTAATAGGCAGGATTGTACAATGAGCAACTATCA
CCR1265	chr14:54944209-54944249[-]	ATGTTCATCAGTCACTCATTTTTAAGGTCGGGAGTTAGATT
CCR1266	chr14:73958948-73958988[+]	CCAGGATGGAGTCCACTCTCTGCACCTCACCTTGTCCACGT
CCR1267	chr3:75787224-75787264[-]	GAAAAACCCTACGAATGCAATGAATGTGGGAAAACCTTTCG
CCR1268	chr17:26521723-26521763[+]	GCAATTCTGGAGGTTAATCATGCTTGTACTGTAATTTTACT
CCR1269	chr19:1011138-1011178[-]	CACTTCGCCTTCTATGCCTATCACTACCGCTTCAATGGGCA
CCR1270	chr15:40488764-40488804[+]	ACCTAGTATAAACCACATCCTAAGCACCAGAAAGCCTGGAA
CCR1271	chr14:105476594-105476634[-]	CCTGGGTGAGGAAGTAGCATTGCTGCTGGATGAGAAACGCC
CCR1272	chr8:74706012-74706052[-]	AAGCTCCAGGTCCTCATGTATTGTGCAATAACAATGACTTC
CCR1273	chr2:85542323-85542363[-]	GCACGGGCCACACACACACGTGCACCTTACGCCTGGTCCAT
CCR1274	chr16:2222166-2222206[+]	AGGGTCAGCACGCCCTCCTCTCCCAGAGAAGTGTCCCGTGG
CCR1275	chr22:36913405-36913445[-]	CCCCTCAAGATGAAGGTAATTCCTTCAATTCACCCCGCAAC
CCR1276	chr6:33371587-33371627[+]	TAAATGCAGAACTAAAACGGTGCCGTGAGAGGACTCAAACG
CCR1277	chr21:43411304-43411344[-]	GTCACTTCCAATCGCACATGTCTCAGGCTTCAGAGGAATCG
CCR1278	chr17:75192274-75192314[+]	TACATTCCAGACAAACTAGATGCCGACTACATCAAGAGATA
CCR1279	chr10:124190542-124190582[+]	TTTGAGAATACATTTAATCATAGGGATATAGATATAAGCAC
CCR1280	chr12:12871803-12871843[+]	GTTTCAGACGGTTCCCCAAATGCCGGTTCTGTGGAGCAGAC
CCR1281	chr1:2335108-2335148[+]	TATCCTAATGACTCAAAACTTGGTTCTTAACTACCATGATT
CCR1282	chr2:23929900-23929940[+]	TCTTATGACAACATTAGGCATCAGGCTCTCTTGGAATAAGA
CCR1283	chr12:48537844-48537884[+]	TGAGAACTATACCACTGACTTCATTTTCAACCTGTACTCTG
CCR1284	chr19:1592503-1592543[-]	CACAGGGATGTCTTTTACTATAGGTGAATGAGCGCGCCGGC
CCR1285	chr19:33873435-33873475[+]	TCCATTCTGCAGCTGTTAGATCTGCCTCTCAGGAAAAAGTA
CCR1286	chr1:205583768-205583808[-]	CTTGTATAAGAAGACATCTATGCTAGCTAACTTAGTAGTAG
CCR1287	chr19:37241031-37241071[-]	ACTTCTGGCTCAACACTAAATCAACATCAGCAAATTCACAC
CCR1288	chr9:130825776-130825816[-]	TGATCAAAGATTTCCGCCGCTACCTGCAGAGCAACACAGCT
CCR1289	chr21:33057875-33057915[-]	GCGCCCAGGATTCAACCCAATGCATTTACCACCAGGTACAC
CCR1290	chr1:93308652-93308692[-]	TGACTGACTTTAAAAACCAATGCTGTGAAAAGCTTCATTCC
CCR1291	chr4:77969186-77969226[-]	ATTTGTGTGGCTAATTATAATTCAGCGTTATTTAAGCACAT
CCR1292	chr1:32661397-32661437[+]	TGTGCTGGTCAGGAGCCCCTTGGGCATCGCTTCCCCTGCCC
CCR1293	chr9:99958192-99958232[-]	CCAGTATAAGACACACAAGATGTATTTTTTTCTCTGGTGAA
CCR1294	chr19:34297766-34297806[+]	AGGATAAGCCGCCTCTTCAATGGCACTGAACCCATCGTCCT
CCR1295	chr15:45900168-45900208[+]	TGTTTAAAATCAAGAGTGTATTGTTTACTGTTTTACAGTAT
CCR1296	chr6:111215066-111215106[+]	GTGCATGTAGAAAAAACCTTTTACTATATGAAACTTTACAA
CCR1297	chr20:48519924-48519964[-]	TAAAAATAATAATAATAAAGTGTCTTCCATTGTTAAATGAA
CCR1298	chr6:20491401-20491441[+]	ATGTGTTTGTGAGTTTCCAGTTGATTTGTAGCAAATGCCTA
CCR1299	chr5:137519711-137519751[+]	GTTGAAGGAAGCAGGAAACATTAACACCTCTCTACACACCC
CCR1300	chrX:8497154-8497194[-]	TAGTGTGCAGATAACAAAACTGCTACCTTCTCATCCAAGTG
CCR1301	chr7:100285250-100285290[-]	GAGGTGGTTGGGTGCCTGGGTCCTCACTCCCGCCCCTGGCT
CCR1302	chr18:23632741-23632781[-]	TGGACCCAATCAACTCAATATGACAAACAGTTCCATGAATA
CCR1303	chr10:129901962-129902002[-]	CCACTAAAATACCCTGCGAATCTCCCCCACTAGAAGTGGTA
CCR1304	chr2:74753788-74753828[-]	GAAGGATGAGGCTCCCCCAATGTCACATTAAATTCATGGTT
CCR1305	chr20:52192973-52193013[-]	GATGTGCCTCCCCTCTCTAGTTTCTGTAAACCCAAGCCCAA
CCR1306	chr19:1257589-1257629[+]	CCAGCTCCAATATGTAGCAGTCTCTCTGGATGGCGGAGAGT
CCR1307	chr10:32298644-32298684[-]	AACATTTGGCTGCATCCACATAGACCTTTATGTTTTGTTTT
CCR1308	chr6:26156602-26156642[+]	TCACGCTTGCCTTCAACATGTCCGAGACTGCGCCTGCCGCG
CCR1309	chr7:77423402-77423442[-]	AATGTTACTTAAATTAGCCTTCTGCCTCGCACTCTGTGCTA
CCR1310	chr20:34242848-34242888[-]	GCCCACAACAGTATCCAACTTTAATAATCCATCACCCAGTG
CCR1311	chrX:71493734-71493774[-]	CCTCATCTGGTGACTCATGATGCCCGCACCATCCGCTACCC
CCR1312	chr5:167984589-167984629[-]	CAGGGTTACTTTGGAGCAGTTGGTGCACTTCTTGGGCTGCC
CCR1313	chr4:13339396-13339436[+]	ATTCTCTAAAAATCTCAAGCTTGGAATCCACAAGGACTCCA
CCR1314	chr17:40176366-40176406[+]	TAGTTGTGCACACACAAATATGCTCCTATACTGGCATTAGG
CCR1315	chr12:56663315-56663355[+]	CTATCCTCGAACCTGCACTGTGGACTTTTCGGTGAGTCAGG
CCR1316	chr10:31810693-31810733[+]	GTTACCCACAATCGTGGCCATTGCTGACCAGAACAGTGTTC
CCR1317	chr17:1795184-1795224[+]	GAAGCTATCCTTGGACAAAATGCTGCTTATCTTGGGGAATT
CCR1318	chr12:27128428-27128468[-]	TTCCACAGAGCTTTCACAAATGTGCCTTTTCAAACTAATGG
CCR1319	chr1:161197013-161197053[+]	ATGCGCTTTTCTCCACTGAATCCTCTTTTCCTCAGGTGGCG
CCR1320	chr3:49051270-49051310[+]	CAGCTGTTTGTAACCATATCTCCTCGGTACGTGCTGTGGCT
CCR1321	chr14:75369472-75369512[+]	TGTCCTGGCTGTGCACATTCTCCCTTGATTCCACTTGTGTG
CCR1322	chr12:4409773-4409813[+]	TGTCCTCTTGCTGTCTACAGTAGCTGCTACCTAAAAAAAGA
CCR1323	chr4:17963525-17963565[-]	CAAGCAGAAAATTACCTAAATGCACTCTTTCGAAAGAAAGG
CCR1324	chr21:33043647-33043687[-]	CAGTGACACTTCCTGGAGTGTAGAGCTTGAGGTGTACAGAT
CCR1325	chr5:141511780-141511820[+]	ATTTTGACTACAAGGATGAGTCTGGGTTTCCAAAGCCCCCA
CCR1326	chr22:41833283-41833323[-]	GAACTTCATCATCTCCTACTTGTACAACAAGCTGCCCCGGC
CCR1327	chr19:56954050-56954090[-]	ACCAAGAAGTTACCTCCAAATCAATGCAACAAATCTGGGCA
CCR1328	chr12:22637665-22637705[-]	TGATGTTCTGTTTACAACTATAGACCTCCCAACAGATGCAA
CCR1329	chr1:70717971-70718011[+]	ATATCTAGCAAATTTATATTTTCGGTGAAATACAGATATTT
CCR1330	chr8:145135139-145135179[+]	CTGCAGGTGCTACAGGCAGATGGTGGGACCTATGCAGCTTG
CCR1331	chr20:62906935-62906975[+]	AAAAATCTGGTGGTAATATATGTGAGAAATACTTTGGTGTT
CCR1332	chr13:48835782-48835822[+]	TTTGAGCACACATTTTAATTTTCCTCTAATTAAAATGTGCA
CCR1333	chr17:56573183-56573223[-]	TGTCAGTGCACTCTCCAAGGTCATTTCTAACAAGTGTGATG
CCR1334	chr9:96318804-96318844[+]	GCTCTTCCAATCCAAACTCCTCAAAGCCAGCCGGGAAAAGA
CCR1335	chr19:44593687-44593727[+]	ACAACCCTAACCATACTCATTATCTGTAAAAGATGTAGCAT
CCR1336	chr15:59350724-59350764[+]	TAGTACCACTGGCACTTCTATAGGAGGTATGTAAAAAAGTG
CCR1337	chr6:97344678-97344718[-]	CCAGAAGTTAAAGGAGAGATTGCTCGTAAAGATGAAAAGCT
CCR1338	chr15:55904035-55904075[-]	GCTGAGCTATATTAATTTTATACTTGACTCAGGGGATCAGT
CCR1339	chr15:78792759-78792799[+]	TAATATGTATACCTTATAATTCTGCCTCTAGCCAAATGCTA
CCR1340	chr7:25161679-25161719[-]	GTAGCTTACAAGGGGACAATTCTGGACTAATGAGAAAGACC
CCR1341	chrX:118604410-118604450[+]	GGGTTGACTTCCTATCCATTTGACACTGTTCGCCGCCGCAT
CCR1342	chr2:70315115-70315155[+]	GGAAGATATCAACAGCTCCATGACCAACAGTACCGCGGCCA
CCR1343	chr1:27688159-27688199[-]	CTTGGTGAGGCCTGTAGGGGTGGTGGACCCGGGAAAGGGGT
CCR1344	chr16:69724892-69724932[+]	TGCCCTGATGACTCCACTCATACCAAGCAGTATGATTAAGA
CCR1345	chr11:116645129-116645169[-]	TTGGTCCAAGAAACTATTGTTTGCACTTTTGTGTAGTTGTG
CCR1346	chr13:53048173-53048213[+]	AGTTGCTTAATTAAATATAATGTGTCTACTACGCCATACTT
CCR1347	chrX:16863120-16863160[-]	TAAACCCAAAGTACGAGAAATGTTTCTGTTGAATGTAATGC
CCR1348	chr8:11667264-11667304[+]	CTGTTACACAACTTTCACTCTTTCCTTTACCAACCAGACTG
CCR1349	chr7:72907152-72907192[-]	AAATGGGCTCCTCCAAAATTTCTGCCTCACAAATATGATGT
CCR1350	chr4:77065572-77065612[-]	TTTGGGACAACATCTACAACTGCAGGTTCTGCATTCAGCTT
CCR1351	chr3:3215804-3215844[-]	TCCCGGACAGACATTACCTCTTCAGCTTTTTCACCCTCAAG
CCR1352	chr22:31834218-31834258[+]	GGGAAATAAGTATCACCTCATAGCAGGACTGAAAAACCTCC
CCR1353	chr16:24837116-24837156[+]	GTTAAACTCTCATACCTCTGTTACAAAGCGAGAAACGCCAC
CCR1354	chr21:37759934-37759974[+]	CGTGGAATTTTTGTCCAATCTTGCTCGTCATACCAAAGCCG
CCR1355	chr6:111215396-111215436[+]	CCAGTTACTCATTTTGCATATTTGCTATTTTAACATTATTG
CCR1356	chr2:60695911-60695951[-]	AGGGGCCTCTCCTCCCCTCGTTCTGCACATGGAGCTCTAAT
CCR1357	chr7:66422257-66422297[+]	CATTGGCCTAGAACATTTTATCCCAGGCATTTTTGAATAGA
CCR1358	chr7:151181827-151181867[-]	AATGGACAAGAATATCATCTTCAACTTGTAGACACAGCCGG
CCR1359	chr11:89947221-89947261[-]	TATGTGAATTAAAACCCAAATTTCAGGAACACATCATTCAA
CCR1360	chr12:30862629-30862669[-]	AATGACAATTAGCACTAATCTGGCACTTTATAAATTGTGAT
CCR1361	chr4:81123065-81123105[+]	CAGGGTCGTCCCCTTACACATGCCTGGAATGCAGCCAACGT
CCR1362	chr22:40731430-40731470[+]	TTTATGTGTATTTTTTGCCATAGCAGGTACTGTATTTCTCA
CCR1363	chr2:73958878-73958918[-]	GGATCCATGTCTTTTTCATATACCAGGAACTTGCTTGTACC
CCR1364	chr10:104557805-104557845[+]	ACTGCTGTGGACAGTCTCAGTGCTGCAACTACTACTATGAA
CCR1365	chr14:57673388-57673428[-]	TGTTTGAGTTCTGTGCAATATTTTCTATTATGTCCGTTGAT
CCR1366	chr8:57074218-57074258[-]	AAGTGTACAATATATTTTTATACTGTGACTTAATTTGTCAT
CCR1367	chr1:36199911-36199951[-]	TTATGTTTGTATACTTGTAATCTTATAATGGGGAAAATGTG
CCR1368	chrX:134167494-134167534[+]	TGCATTCTGCTCTGCTCTAATACACTACCTGGAGAAAGTCT
CCR1369	chr6:30587264-30587304[+]	TTGTAGGTTCCCCTCCAGACTCTTTGCACCAAAGCTCCCTC
CCR1370	chr5:130977397-130977437[-]	ATTTGTGCAATAAATACACATGTCAACTTGATGGATGGTGT
CCR1371	chr1:70694198-70694238[+]	ATTCGTTGACAGAGCTTTGATAGTCGTACCATATGCAGAAG
CCR1372	chr5:130940314-130940354[-]	AATGGAAATATTATCAAATCTCAGGGAACATCAGCTTAGGT
CCR1373	chr6:24705107-24705147[-]	AAAAGAAAACCTAAATAAAATAGGTGAAAGTTCCCTGACTA
CCR1374	chr8:94744073-94744113[-]	ACTTTAAAAGTTTCTTTCTATCCAGGGTTTCTCTTGGGATA
CCR1375	chr22:50956670-50956710[+]	ACCAGCGGGCGTTTCCCCCATGCCAGGGACCCAGAAGGGTG
CCR1376	chr1:38174130-38174170[+]	TTCCAGAGCAAGGAGCCATGTTCCTCTAAGGGAATTCAGGA
CCR1377	chr18:74091467-74091507[-]	GGAGTGGTCACAAAAGCCGCTAGCATGCCTAAGAATAAGGA
CCR1378	chr16:28967598-28967638[+]	CCGACTCTTCCCACTCAAAATCCGTTGCCGGGCTGACCTGG
CCR1379	chr19:41825623-41825663[+]	CTGCTTGCCCGCTCTCCAACTTGCTGCTCCAGTCCTACGAG
CCR1380	chr3:64004558-64004598[-]	GTTTCAACATTTACATCCTATGAACTCATGGATTATAAAAC
CCR1381	chr14:93707131-93707171[-]	TTTGGCATTTACTAAACCACTGAGCACATGGGGTCTTTCAG
CCR1382	chr7:5391618-5391658[-]	CAAACTGACGCCTTCCCTCCTGTGTAGCATGGTGGCAAAGA
CCR1383	chr12:49436511-49436551[-]	ACGCCACTGCAGAGGCCCTTTCTTCAAGGTAATACAGGTGG
CCR1384	chr10:35495833-35495873[+]	TGACATGCCAACTTACCAGATCCGAGCTCCTACTGCTGCTT
CCR1385	chr13:35782928-35782968[+]	GGCAGTACCTCTAATATATTTGCTGCTACTGGAGCTACACC
CCR1386	chr2:224831647-224831687[+]	GTGGCCCTTAGAAAACTTTATGGATTCACAGAAAATAGACG
CCR1387	chrX:84527599-84527639[+]	GTTGCAAACAAAATCAGCACTATATTTCTTAATGATCTAAA
CCR1388	chr19:5786513-5786553[-]	GAAATGGGGACATCTTGTCATTTGAGGATGCCAACCGCGCC
CCR1389	chr14:60758122-60758162[+]	GTTATTGAAGCCGTTTACAATAGACTGAATCCTTACAAAAA
CCR1390	chr22:46704761-46704801[+]	AGAGGAAGCCCGGGACCAAATTGCTGCTGCCTCGAGCGGCC
CCR1391	chr2:27875947-27875987[-]	ATGTTTGCTAACTTCAAAACTGTGCTTGAATAGACTAATAA
CCR1392	chr1:42644527-42644567[-]	AGTGTCATTTTAATATTTATTGCTACCTTCTGTGAATGCTT
CCR1393	chr12:8192639-8192679[+]	TATGCCACTCTCATCACCTATGCCATCAACTCCTCTCCAGC
CCR1394	chr5:98191172-98191212[-]	GTGTTTGTAGTTTTAAAAAATGGCGAGATATGTAAAATCTA
CCR1395	chr20:57572768-57572808[-]	AGTGTGACAAGTTTAACCAATGTGGGACATGCAATGAATTC
CCR1396	chr4:129795193-129795233[+]	GACTGACTATTTTTGAGTTATGGGGCTCATTTTGAAAGACT
CCR1397	chr4:122737947-122737987[-]	TCTTCTTTTCACTGGCTTTTTACTTGGTGCTTTTTCTTGTT
CCR1398	chr5:135518381-135518421[+]	ATTGTTTGCTAATTCTTTACTTTAATAAACCTCAAAACCTG
CCR1399	chr14:35331347-35331387[-]	AATTATTCCAGTTTTATACTTGACCAGCCTTACCCATCGTT
CCR1400	chr2:198266217-198266257[-]	CCTTTTAGGTGGTAAAACAGTGTTGTGGGACAGATGGTGTA
CCR1401	chr1:114500746-114500786[+]	CAGATGTCTCACTACTAAACTACCAGTCAGCTTTGTACCCA
CCR1402	chr5:159378359-159378399[-]	CTTCATTGACCTCAACTACATGGTTTACATGTTCGAGTATG
CCR1403	chr16:70597817-70597857[+]	AAGTAGCCTTCCCACTGCAGTACACACCCAGGAAATTTGTC
CCR1404	chr10:76928365-76928405[+]	GTTTGTGACCTCCCTCTCCGTGCCAGGACAACACCTGCAGT
CCR1405	chr2:18736767-18736807[-]	AAACTGGCTAACATTCTTTTTACCAGGGAACTAGCCCGCCG
CCR1406	chr6:89793486-89793526[+]	GATGGGAAAATCGGAGAAAATTGCCCTTCCCCATGGCCAGC
CCR1407	chr6:30166223-30166263[-]	CAGAGACAAAATTCAGGGCTTCCAGGCAAAGGGAGAAGCTG
CCR1408	chr7:87460539-87460579[+]	TGCCAAAGAAATTTTATACATTGTTTACATGATGAGGCCAC
CCR1409	chr17:27613413-27613453[-]	AGACTGTTACTGGGAAGTCATCAGAGCATAAAGTGATGGAG
CCR1410	chr9:33038956-33038996[+]	GAAGGACTGTAATCATAATATGCTCACTACTTGCTCTTGTT
CCR1411	chr2:191556235-191556275[+]	TTTTAGTTCCCCCAATTTAATTAATGGACCATGTGCATATA
CCR1412	chr11:105952197-105952237[+]	GGTGGCTTACTCTAAAAAAATTGCTGCTATAGAGGATTCTT
CCR1413	chr18:20744614-20744654[+]	ACTAAAGCTTTTTTTTTTTTTGCAGGATAATTTTTTTTAAT
CCR1414	chr16:2049003-2049043[-]	CCCTGGCTTCTCTGGCCTTCTGCCTAGCCCCCACCCGGCCT
CCR1415	chr9:139264881-139264921[-]	CCAGCCAGGCCATTGCCTTTTGCCCCCTTCAGGAGGGGAAG
CCR1416	chr4:90163302-90163342[-]	GATTCAAGCTCAAAATTAATTGGCTGCAAAATAGTAGGAAT
CCR1417	chr2:219317071-219317111[-]	TAAATAGATAATATATTATTTTTTGCACATTGTGATCAGTT
CCR1418	chr11:47238432-47238472[+]	CACTCTGGATTCTTACCGGATATTACAAAAGGCTGCCCCCT
CCR1419	chr7:120428299-120428339[-]	CCATGCAAACGAGTCACATATGGTGGGACTGGAGCCATAGT
CCR1420	chr12:16052926-16052966[+]	ATTGAGACTATGGCAAACTGTGGTAGGAAAAACGTATGGCC
CCR1421	chr1:212910081-212910121[-]	TGTGACAAAAATCCTGTTAATGTTGAATCTGTGTAATGACT
CCR1422	chr14:34903273-34903313[-]	TATTGCTGAATTATTTTCTGTGGAGGACCAGATAAGCAGTA
CCR1423	chr6:33168343-33168383[-]	ACGGGCTTAATTCGACCCAATCCAGGCCAGAGTCTTTCTCT
CCR1424	chr20:43532643-43532683[+]	GACAAATATCTTATTCCCAATGCTACACAACCAGAAAGTAA
CCR1425	chr19:7116966-7117006[-]	AGCCTCTGGAAAACTCAGGATTCTCACGACTCTACCATGTC
CCR1426	chr14:31084598-31084638[+]	CAGGCTTATCCAGAAGCATTTTGTAGCATCCTGTGTCATAA
CCR1427	chr3:141595509-141595549[+]	CGAGGAGGTGTTCTCGGCCGTCCCACCCTTCACTGCCGTCT
CCR1428	chr20:2129128-2129168[+]	TTTGTAAATTAAGGGACGTTTGTGTGAATAAAGTTATTTGA
CCR1429	chr15:89864058-89864098[-]	CTTTGCTGAGCGCTTACTAATGCAGTTTAACCACCGGCTCA
CCR1430	chr11:1297976-1298016[-]	ACGTGCGTCTCTCCTTCTCATGCCGTTCTGGAAAATGCTCT
CCR1431	chr16:87364777-87364817[-]	ACTTTGGAAATCCGGCCTTTTGACCAGAACGCACACCTCGT
CCR1432	chr1:120153384-120153424[-]	GAGGCAGTTAAATCTGGGGATGTGGGATAATAGACTTCTAA
CCR1433	chr12:115112409-115112449[-]	GCGTCGCCCGACTCACGCCATAGCCCCGCCACCATCTCGTC
CCR1434	chr19:36124067-36124107[+]	GCCCCCTGGACCACCCATGATGCTGCCACCAATGGCTCGGG
CCR1435	chr5:10436971-10437011[+]	TGTAAACAAAAAGTAATTTTTATTTCAACATTTAATGTAAC
CCR1436	chr15:44097573-44097613[-]	GGATCATTTCAATAAAACCATTCTTCCTAAAGTCATGCAGG
CCR1437	chr12:72050912-72050952[-]	ATAAGGATGAAAAACTAGCATTGAGTAGCAAAGAAGAGAAT
CCR1438	chr12:62653899-62653939[-]	CTTTCCTCGCCGCCGAGGGCTCTGGCTCTCTCTCGCTAGAG
CCR1439	chr15:65956929-65956969[-]	GAATGATGTCTATGGACCAATGAGTCAGATTTTAGAGACAC
CCR1440	chr6:138412611-138412651[-]	TTGTGAGAATTTCTCATTAATATCCTGAATCATTCATTTTA
CCR1441	chr10:112058500-112058540[-]	AGAACTAACCAAAGACCTTCTGTCAACTCAACCTTCTGAGA
CCR1442	chrX:39910780-39910820[-]	TGAAACTTTTATATCCTAATTTAAAAGCTGTGAAATTAGTT
CCR1443	chr1:111494193-111494233[-]	GAGACAAAATCACTTTCCAATACCCAGCTTGCTTCCATGGC
CCR1444	chr3:19993965-19994005[+]	CTTTCAGAAGCAAAACTTTATACTGTGCATTTAGTGAATGC
CCR1445	chr17:39981450-39981490[-]	GGAAGTTCAAACAAATATAATGTGTGAAACAGATCAAAATT
CCR1446	chr10:121598079-121598119[-]	CTCCAGCTGCCCAGCAATACTTCCCTTGTAATCGATGAGAC
CCR1447	chr17:30814764-30814804[+]	GCGCCACTCCATCATCTCCGTGCTGCCTTGGAAGAGAATCG
CCR1448	chr19:36036822-36036862[+]	AGGCTGGAGTCACCTACCTCTTTGTCCAACTCTGCAAGGTG
CCR1449	chr19:16630074-16630114[-]	CCCCATCAAGGGCGGGGACGTCCGGGATAAGTGGGACCAGT
CCR1450	chr17:56772438-56772478[+]	GGCTTCATAATCACCTTCTGTTCAGCACTAGATGATATTCT
CCR1451	chr6:37142731-37142771[+]	GAAAGATGCGCATTCTAACCTGGAGGTCAATGTTATGTATT
CCR1452	chr17:10614145-10614185[+]	TAACAGGCCATCTTCCCATTTACCCGGACGCCTCTGACAAT
CCR1453	chr5:177022771-177022811[+]	CCTTTGCTAACTTAGGGTTTTGAGCAGGTTGGGGTATGGTG
CCR1454	chr12:12619437-12619477[+]	ATTTGATGTGTCCAATATTGTGCCAGGGATACAAATATGGC
CCR1455	chr1:17349127-17349167[-]	TGCAGGACCCATTCTCTCTATACCGCTGCCACACCATCATG
CCR1456	chr1:220089113-220089153[-]	ATTCGAGAAATCTTCCACCATGCGGGAATCCACAATGTGAC
CCR1457	chr1:205719118-205719158[-]	GGGTGGGGGGGGTCCTGGTCTTTGGCTTCTCGACTCGGTCC
CCR1458	chrX:53246988-53247028[-]	GAACGCATTGTTTATCCCTATGAAATGTACCAGTCTGGAGC
CCR1459	chr17:68173071-68173111[+]	ATTATGTAACACTAGCCGAATGGTAGCCTCTGGGTTGTTGT
CCR1460	chr5:110439585-110439625[+]	GGGGACCCATTACTTCAATTTCATTTCGCACAGGTAACTTT
CCR1461	chr19:40486596-40486636[+]	GAGCTGATATTAACTCCATCTGTCAGGAGGTAAGTGGTGGT
CCR1462	chr19:58265147-58265187[+]	TTTAGCAACAAACACTCACTTGTCCTTCACCAGAGACTTCT
CCR1463	chr11:13484704-13484744[-]	CAGCCACCTCCGGAGGGATCTGGCTGAGGAGGAAGTGGAGG
CCR1464	chr19:23836277-23836317[-]	TTCATTCTGGAGAGATACCCTACAAGTGTGAAGAATGTGGC
CCR1465	chr10:112338408-112338448[+]	CTTGAAAGCGCTGGTTTTTCTCGAAGCAATCCTTATTATAT
CCR1466	chrX:100911752-100911792[-]	TGGGGCTCACACTGGGGCTATACCGAAAGCCACATCAGCGA
CCR1467	chr9:127910520-127910560[-]	TACTTGTGAAGCCAGCCAATTAATAAAGCACTTTAGCATCT
CCR1468	chr9:19376551-19376591[-]	GCAGCACAAACGGCGGCGTATTGCTCTGAAGAAGCAGCGTA
CCR1469	chr21:34922581-34922621[+]	GGAGATTGCAGATTCATCCATGACAAGACCGCAGGAGTTGC
CCR1470	chrX:24229554-24229594[+]	GCCAATCAGTCTCATTCACATACAATACTGTATATTGATTT
CCR1471	chr11:34133688-34133728[+]	TAGCAGCCACAAACATTCGCTACTGCTACTACAACGAGACC
CCR1472	chr4:69179571-69179611[-]	AGTTGAATTGACACTTTTATTGGGGCAGAATGGAACAGTCC
CCR1473	chr22:38882379-38882419[-]	TCTTCAGCCAACAATCCCAATCTGATGTATCAGGATGAGTG
CCR1474	chr3:134074865-134074905[-]	TTCTTTTAAAGTATTTTTTGTGCTGTGAACATTTTCTGCCA
CCR1475	chr17:72200213-72200253[+]	ATCGCCGGGAGACGTGTCTCTTTCCTCTCTGTTCACCCGCT
CCR1476	chr1:27226641-27226681[-]	GATGTCCGGCCTCTCTCCACTCGAGACTCTACTCCAATCCA
CCR1477	chr9:103348656-103348696[+]	TTAAAAGTTACTTTTAAATCTCAGGTGAAAGTAGAGGATGA
CCR1478	chr19:37004996-37005036[-]	TTTTCTCAGTTCTCAACCCTTGCTCTGCACATGAGAATCCA
CCR1479	chr17:37009956-37009996[-]	CGACTTCCTTTTTTCTTTTTTCCGGCGTTCAAGATGTCGAA
CCR1480	chrX:39931974-39932014[-]	TCAGTGACTTCCACGAAACTTATACTTTCAAACAGCCAGTC
CCR1481	chr21:28209344-28209384[-]	GAATGTTTATACATTATTTCTACCGAGAATTAAAACTTCAG
CCR1482	chr3:99897400-99897440[+]	CTTTTGACAACTCTCTTATATAATAAAGTATCACCGGCTTG
CCR1483	chr1:93603637-93603677[+]	AGTATGAACAAAGTATTTTATTGCACAGGGTTAACAAACAG
CCR1484	chr12:133345507-133345547[-]	CTTGGGAATTCCTTAAATTTTGTGCAATAAACTATTTTTTG
CCR1485	chr1:53712435-53712475[-]	TGTTTTATACACTTTTTAACTGGTTGCACTACCCATGAGGA
CCR1486	chr17:27232658-27232698[-]	CCCTCCACGTTATTTTCCCTTTCTGCAGCGGTTGCACTACA
CCR1487	chr2:227862507-227862547[+]	ATAAATGTAAACCAATTACTTTAGCACAACAATAAAGATGT
CCR1488	chr12:3939059-3939099[-]	GCTGGTTTTACTTGGCAGAATGTGGGAAGTGGCACATGTTT
CCR1489	chr11:33375252-33375292[+]	TTAAAAACTCACTTTTGATGTGTTTTGCACATTTGGTATAA
CCR1490	chr2:235401700-235401740[-]	CTTTTATAATGCATATATGATGCTGTGAACAGAAATAAATT
CCR1491	chr4:73933794-73933834[-]	CAGCCAGAAATAAAAACTATTGCCAGGCATCTTAACCAAGA
CCR1492	chrX:71426594-71426634[-]	CTACCTGCAGTCTTTGGGGATAGCTGGAATCTCAGACCATG
CCR1493	chr3:179051908-179051948[+]	CACACAAATGTTAACAGGCATGTTGCTATTGAACATACAAA
CCR1494	chr14:95555416-95555456[-]	TGCATGCATTTTTCCCCTGTTTGGTGCTATGTTTATGTATT
CCR1495	chr10:121618654-121618694[-]	GGTACCATCACTGAACGAAGTTCCCCTTCATTATTTGAAAC
CCR1496	chr9:132400495-132400535[-]	TGAAGAGCTTTAAACTGCACTTCCCTCTCCTGCGCTTCCTC
CCR1497	chr8:67577167-67577207[-]	TATACTCCTGTAAATATAGATGGTGCTCACGCCCAAAGAGT
CCR1498	chr17:38556808-38556848[-]	GTGAAGTAGCTATTCTTAATTCTACAACCATTGAAATCTCA
CCR1499	chr1:203769653-203769693[+]	GTTGTTAAATATAATCATTATCTTTATAAACACATCTGGGG
CCR1500	chr17:74731129-74731169[-]	TGGAACAAGCAACTGGCTATTGAAAAGGTTATTTTGTAACA
CCR1501	chr5:169029667-169029707[+]	GTAAAAGCACTTTAACAATGTTAGCTGCTATTATTATAAGG
CCR1502	chr2:63027367-63027407[+]	TGTCCTTGAAAAAAATCTCATCTACCTCATGATTTAATATG
CCR1503	chr8:80950296-80950336[-]	TTCTGCTACCCACTGCCAGATGCTGCAAGCGAGGTCCAAGC
CCR1504	chr9:135929293-135929333[+]	GTCCTCGATTTCCGAATCCGTTGTGGAATGAAACACGGTAA
CCR1505	chr3:32754829-32754869[+]	CAGGGTAACAATAACAAAAATGGAAAGAATGAGGTGAGTCT
CCR1506	chr21:34949754-34949794[+]	CTTAAGGCCCAAATACAAACTTCTCTGGAATAAACGTGGTG
CCR1507	chr18:47801466-47801506[-]	CAGAGCCGGTGAGGCCCCAGTGGGTGGAGGGAAGGCACAAC
CCR1508	chr1:151095357-151095397[+]	AAAAGGCATTGATTTTTATTTACTCGGAACGGTCCTCTTGG
CCR1509	chr12:42553934-42553974[-]	AAGTCAAAGAACAACTTAACTATTGCTGCAACAGGTTTTTC
CCR1510	chr6:93951037-93951077[-]	CCAGCACTTTACAATTCTAATCAGTAGCATTGGCCTTTGTG
CCR1511	chr2:55200030-55200070[-]	AAACCGTAATCATATCTTTTTCCTATCTATCTGAGGCACTG
CCR1512	chr12:65078623-65078663[+]	GAAAGTTCATAAATACAACTTAGCAGTCACAGACAAGTTGA
CCR1513	chr9:108152668-108152708[+]	GAGCAAATTTTTTAAACTTATTGCACTAAATACAGGCTCTG
CCR1514	chr18:13742553-13742593[+]	GAAAGGAGATTATCCTTTATTTGGCTGCAAATATGACTTCA
CCR1515	chr10:96328232-96328272[+]	ATTTCTGTGAGTCATTTCATTTGCTGCTACTCTGGTGTTTA
CCR1516	chr22:21354997-21355037[-]	ATTTGAGTCTTTCTCCAAGTTGCGCCGGACAACCAAGACCA
CCR1517	chr17:37618513-37618553[+]	GGGCACAGTTATCAAACCTTTGGTGGAGTATGATGATATCA
CCR1518	chr2:172414532-172414572[+]	TTTATGGAAAAAATATTAACTATCCTGAATATTTTATAATT
CCR1519	chr17:28852084-28852124[+]	GTTTGTAGACTTCCAACATCTACACTGCTGCTCTTCACCAT
CCR1520	chr6:36471724-36471764[-]	GAGAAACTGGAGTACAGATTTACGAGGTTGGAGTTGGAGGA
CCR1521	chr7:72892334-72892374[-]	CCTGCAGCCCTACACCTCATTGCATACTACAAAGAAAACAA
CCR1522	chr7:26412832-26412872[+]	AGTGCTAGTAATATTACTTATAACTGTAATATATAGATTCA
CCR1523	chr1:52552558-52552598[+]	ATGCTGTTTGTTCAGCATTTTTCGGTCATTTGATTTTGCAT
CCR1524	chr12:111169584-111169624[-]	TCTCAGTCAGCCTATCCTACTAGAACTTGAAGCACCACTCA
CCR1525	chr7:123332662-123332702[-]	CCCTTCCCTCCTCAGCACCTTCAGGGCCTCCACCACCACCT
CCR1526	chr10:101923806-101923846[-]	TGAGAAGACAAAACTCCTTATAGCTGCACAGAAACAAAAGG
CCR1527	chr3:48896546-48896586[-]	AGGGATCTTCAACTGGGCTGTGGCAATCCCCCCAGATGTGC
CCR1528	chr11:10818636-10818676[-]	CTACTTAATTTATCAAGTCATGTTCATGCCCTGATTTTATA
CCR1529	chr12:120536659-120536699[-]	GACGGAAGATGCCTACAAATTCGCCGGGCAGATGGGCATCC
CCR1530	chr1:24021207-24021247[+]	GGGATCCAGGAACACATCGATCTGGGTATCAAATATGACCC
CCR1531	chr2:37454989-37455029[-]	AAGCTCAATATTATGCAATTTGCTTTTTAAATCAAATGGCT
CCR1532	chr7:115898789-115898829[+]	GGAATGAATGATATGTATATTACTCAAAATAAAGTTTCTTT
CCR1533	chr9:100672256-100672296[-]	GAAGTGCGGTTTACTCCTCATGCCGAGATGGACCTTGGGCA
CCR1534	chr9:22004594-22004634[-]	GTTGCTTGATCATTATATCATTGGAACAACTGATACTTCAC
CCR1535	chr9:34241554-34241594[+]	GGAAGAGCTGAGAAATATTCTGGTAGGAACCACTGGACCCA
CCR1536	chr3:10028253-10028293[-]	TACCCATCGTTATCATCACTTTCTTCGTAGGCATGATCCGC
CCR1537	chr20:49369191-49369231[+]	ATGAATACCTTTTTAACAATTGTGTGCTATTACAACAATGA
CCR1538	chr19:37677565-37677605[-]	CTTCATCCAGAAAACACAATTGATTGCACACCGAAGAATTC
CCR1539	chr17:61908214-61908254[+]	GCCCGGGCTGTGGCTCATCATACGGACTGTACCTTTATTCG
CCR1540	chr10:7844738-7844778[+]	TTGACATTGACATTCAACCGTACCCGCCAAGCTGTCATCAC
CCR1541	chr19:14211685-14211725[-]	CACAGGACAACTCAAACTTATACATGGTCATGGAGTACGTG
CCR1542	chr1:154960949-154960989[+]	CGTCCGAAACGTCTACCTCTTCCCAGGCATTCCAGAGCTGC
CCR1543	chr21:27252938-27252978[-]	GAAGTGGCAATATAAGGGGATGAGGAAGGCATGCCTGGACA
CCR1544	chr6:159187430-159187470[-]	AAATTGAGTCTGAAGCACTCTCGCACACACAGTGATTCCCT
CCR1545	chr1:85733292-85733332[-]	CACGTACTGTTTCACGACAATGACACTTTATTGCCTTTTAA
CCR1546	chr6:97246134-97246174[-]	AAGTGATTACAAATATTACCTCCAGGGTTCAATAGAAATCC
CCR1547	chr6:18225722-18225762[-]	GCCATTTTTAGTTTAAAATCTTGCATGGCATTAATTGTTCC
CCR1548	chr3:183901817-183901857[+]	AGCTTCATTTTGTACACGTGTGACTTCGTCCAGTTACAAAC
CCR1549	chr9:5763413-5763453[+]	TTGCTCTATGATTCTTTATATACTCGGAACAATGCTAGAGA
CCR1550	chr9:23691107-23691147[-]	TTGTCCTGAGGACTTGAATTTACAGTGCATCAGATTTGTTG
CCR1551	chr6:47200147-47200187[-]	GTATTTTCAAGATTATTCTGTGCACTTTAAATTTACTTAAC
CCR1552	chr15:52902291-52902331[-]	TACAAACAGTTCACAGCGTCTGTGTAGCAAACAAACTTGGA
CCR1553	chr19:57804716-57804756[+]	TACATAAAGTGACTGGAATTTTAACAGGTGAACCTGCATAT
CCR1554	chr17:6917472-6917512[+]	CCCAGAACATATACAACCTTTACGAGCAAGTCAGCTACAAC
CCR1555	chr4:100871353-100871393[-]	GATCTCACCGTGGGTCCGATTAGCCTTTTCTCTGCCTTGCT
CCR1556	chr3:160789105-160789145[+]	AAGGAAAAGACATTTTTAAATTCCGGTTATTTTTATTGTCT
CCR1557	chr6:99847815-99847855[-]	GTTCATTTTTGTTAAACTCTTGCACCTTAATTTTATGGTTT
CCR1558	chr11:58385891-58385931[+]	GGGGGCTGCCCTCTACAGTCTCTTTGACTGTAAGACAGGGC
CCR1559	chr16:30749903-30749943[+]	CTGCTCGCCATCACCCCACCTGCTGTGAAACGTCGGAGGGG
CCR1560	chr1:156186307-156186347[+]	GTGACCCGGCTAGCCGGCCGTGCTCCTGCTTGAGCCGCCTG
CCR1561	chr3:87276654-87276694[+]	CCGGGCGCAGTCTTTAACCATGGCGTCCCTCTTCAAGAAGA
CCR1562	chr2:75885963-75886003[+]	TTCTCTTTTTTTAAAAAAATTTTTGCACAGAGTATCTTTTT
CCR1563	chr21:34003242-34003282[-]	GGTACTTGCTTTTGGCAGGATAGAGCTAAGAGAATTGGGCA
CCR1564	chr2:61721089-61721129[-]	GAGAGAGTCCATTCTCTACATCTGCCTCTCCGTTGCTTTCT
CCR1565	chr7:27146661-27146701[-]	TTTTGAGAGTTCTTCATTCCTTGCTGCTCACATTCTGAGAA
CCR1566	chr7:135076774-135076814[-]	AAAGGCATAGAGGCAGGAATTAGTATGTCATTACACTGAGA
CCR1567	chr1:151378173-151378213[-]	AATGCAGGACTCTTCATTGATTTTGTACAACGGCAGATTCA
CCR1568	chr14:39867018-39867058[-]	CTGTAAGGAAACCAGCTGAATGTTTGACCTGATGACTGATG
CCR1569	chr22:32875142-32875182[+]	GAATAATGAGCAACCCTCTTTGGCCACCAGCTCCAATCAGA
CCR1570	chr8:48882426-48882466[+]	CACATTGATGTCATTCATTATCGGAAAACGGATGCAAAACG
CCR1571	chr19:2235817-2235857[-]	GCCCCGTCCCGGCGCCCGTGTCTCCTCCAGCCCGTCGGAGC
CCR1572	chr20:33128447-33128487[+]	TGTGTCATTCCTTAATTTAATGCCCCCCAAGAATGTTAATG
CCR1573	chr1:62916329-62916369[+]	GAGCTATACAACAAAGCCTCTAATCCTGATAAGGTTGCTAG
CCR1574	chr3:31656596-31656636[+]	GCATATAGCACTTTCTACATTGTGGGTTTAATATTATCAAT
CCR1575	chr14:23530660-23530700[-]	GCGGGAGCAGGAACGGGCAGTGCGGGAACAGTGGGCAGAAC
CCR1576	chr15:50884348-50884388[-]	TGGTTCCTCTTCTGGTGCCTTATTCCCAAGTGCTGTTTCCC
CCR1577	chr11:75111762-75111802[+]	GCTGAACTGAATGAGTTTCTTACTCGGGAGCTGGCTGAAGA
CCR1578	chr8:116616993-116617033[-]	CAGAGAAAAACTCTAACAAGTCCATCCCTGCACTTCAATCC
CCR1579	chr20:34242647-34242687[-]	GCCGCCACCAATTCCTCCAATTCCAGCGATGCCATCTCTGC
CCR1580	chr8:42958793-42958833[+]	CTACCTCTGCCTCGACCACTTCTTCATCGCTCCTCGACAAT
CCR1581	chr5:68467244-68467284[+]	GTGAAAGATATTTATGCTTATCTGAGACAACTTGAGGTAAG
CCR1582	chr14:55852637-55852677[-]	TTAAGAAGTCATTATGAGCGTCTGGCAAATCTTCGACGATC
CCR1583	chr1:147094128-147094168[+]	CTTCCCTCTAGTACACCTTATACCATGCCTCCAGAGCCAAC
CCR1584	chr6:30679187-30679227[-]	AAGAGCTTGGCCCTTCCCATTGCAGCTTCCAGACAACAGGT
CCR1585	chr13:50570543-50570583[-]	AAAAAAAAAAGCCCAACCCTTCACACCACTTCATCCGCATC
CCR1586	chr12:121154715-121154755[+]	GATGATCGAACGGCACTATTTCCGGGAACACTTGCTGAAAA
CCR1587	chr8:48887491-48887531[+]	TGGCATCGTGGACATATCTATTCTTACTACGGGTTCGTTAT
CCR1588	chr3:67059723-67059763[+]	AGTAGGAACATTATACCCAGTTTGCACTAACATGGGCCATT
CCR1589	chr4:83978513-83978553[+]	CTAGAGGCCTTAAAACATGCTTTGCACTGTACGATCTTAGC
CCR1590	chr6:8080051-8080091[-]	AAAATGTTTTAAATGGAAAATGTACTCTAGACCACAGGACT
CCR1591	chr17:26989271-26989311[+]	TCCGTACTATCTTTTCCCAGTCTCGGTTCGACGACTCCATT
CCR1592	chr16:3367454-3367494[+]	AGCCTTTTAAATGTCAGGAATGTGGGAAAACCTTCAGAGTT
CCR1593	chr20:45795657-45795697[+]	TCAGCGTGTCACGAGGGCATTTCATGATGCAGGCGGGGTTG
CCR1594	chr6:36571837-36571877[+]	ATGGAAATTGTTAAAAGCTTTGAATTGCACATTTAGATTGT
CCR1595	chr11:72070008-72070048[-]	GATCACCCGAGAGGATGACTTCAACAACAGGCTGAACAACC
CCR1596	chr1:11168304-11168344[-]	GGTCGGGACTTCTCTCATGATGACACTTTGGATGTTCCAAC
CCR1597	chr3:128344463-128344503[-]	CTCCCAGGTCCACTACACGTTCAACAAGGTGCTCATGCTGC
CCR1598	chr4:128807947-128807987[+]	GCTGCATGTAAGCGGGGGGATACCAGGGAAATGAATGTCTA
CCR1599	chr7:66274175-66274215[+]	TAAGCCTCCGAATCAACCGTTAGCAGCTATTGACTCTGAAA
CCR1600	chr22:38165237-38165277[+]	CACCCCTCCCCTGACCACCGTGCCTCTCCCAGGAGCTGCAT
CCR1601	chr6:137519352-137519392[-]	TCCAGCTGTCTGGAATCACATAGCTCCTTATCTGACTCAGA
CCR1602	chr2:203141151-203141191[+]	TGATTCGTTGTTGTCAATGATGTATTCTTCTTGGAACTGAA
CCR1603	chr6:26124118-26124158[-]	TTTCGACACATTTCTGGTGTTTTAAGATGCCTGAGCCAGCC
CCR1604	chr6:10404900-10404940[-]	GCCGTCTCCGCCATCCCTATTAACAAGGACAACCTCTTCGG
CCR1605	chr19:40541342-40541382[-]	CAACATTGCCAAATTCATACTGGTGGGAAACCCTTTGAATG
CCR1606	chr7:6442593-6442633[+]	ACGTGTTCCCGACATAACATTGTACTGTAATGGAGTGAGCG
CCR1607	chr1:168169281-168169321[+]	ATAAAATGTGATACAACATATACTCACTATGGAATCTGACT
CCR1608	chr1:26764673-26764713[+]	GAAACACATTGCATTCATAATGGACGGGAACCGTCGCTATG
CCR1609	chr11:65268383-65268423[+]	GTTTCTCTTTTTCAGGCTTATACTCATGAATCTTGTCTGAA
CCR1610	chr5:145838441-145838481[+]	CTGCAGGTTTATTATTATAATGCTCGGACACGTGAATCTGC
CCR1611	chr22:19752485-19752525[+]	TTCTGAATTCCATGCACAGATACCAGCCCCGCTTCCACGTG
CCR1612	chr15:40328054-40328094[-]	CATGTTATCTCATGAGCTGCTTCCCACCTGGCTGTATAATT
CCR1613	chr12:93873185-93873225[+]	TTCTGATGGCAGGACAATAGTATGCTACCACCCTTCTGTGG
CCR1614	chr4:113199374-113199414[-]	CAACATCTGTCATTATACTTTTCAGGACAAACAGGTTTCCC
CCR1615	chr11:10825441-10825481[-]	ATTCACGAATCTATCCTTCATAAGTGCATCAAAACAGTAAG
CCR1616	chr19:49636410-49636450[+]	GGCGCGGCCGGGAGGGGCGATGGGGGCGGTGCCGGGGCCCA
CCR1617	chr17:16456203-16456243[-]	TTTAGGCATATCTCATCCCTTATTGCACATCAGAGAATGCA
CCR1618	chr12:26273513-26273553[-]	TGTACATAGTTGTTAATACATCCAATTAATGATGTCTGACA
CCR1619	chr12:90049642-90049682[-]	CTGATATATTATACTTGTAATGGGCGACATGGCAAACAACT
CCR1620	chr8:71078891-71078931[-]	TCGGATGCTGGTAAAACCTTTACCTGATTCAGAAGAGGAGG
CCR1621	chr5:98130329-98130369[+]	CTTGCTCTTTTTAATCTATATGACTGATGCAAGCCCCTCTT
CCR1622	chr19:39880278-39880318[-]	ATCTCATCAATCCTGACACCTACCGCATCGACCCCAATGGT
CCR1623	chr17:46620996-46621036[-]	GCTGGAACTGGAGAAGGAATTCCACTTTAATAAGTACCTGT
CCR1624	chr1:109605196-109605236[-]	TTATGAAACTTAACTTTTTGTATGCTGCTTATAAACATGAT
CCR1625	chr11:27523348-27523388[-]	AAGAGTCCTTCAAAGTGAATTCTGCAATGCTGTGAGAGAGG
CCR1626	chr4:186321555-186321595[-]	AGGATGCATACTATAACTTATGTCTTCCTCAGCGACCAAAT
CCR1627	chr17:18231303-18231343[+]	TTATTAAAAATGGTCATCTATGTTTTGCACTTCAGCTACGT
CCR1628	chr10:98744920-98744960[+]	TGTTCTATAGAAGTAACCTTTTATTTTGCATTAACTAAATC
CCR1629	chr22:39886719-39886759[+]	TGTGTGTATATTTATGGGCATGGGTGCATGCTTGGTGTGTA
CCR1630	chr17:58040234-58040274[-]	AATTCCGCTATCTCTTCAAGTGGCTGCAAAAAAGTCTTCCA
CCR1631	chr17:26687679-26687719[+]	TTGGTGGGGGAGCCATGAGATAAGAGCACCTCCTAGAGAAT
CCR1632	chr8:11695941-11695981[+]	AAGGCAGATCATCTCCACCATCCGGACGCAGAATCTTCCCA
CCR1633	chr13:79911388-79911428[-]	CGAGGGATTCTTTCATCTGGTCGGGGCAGAGGAATTCATTC
CCR1634	chr19:35514302-35514342[+]	GGCCCTGCTCAGGCCTGGCATCCCCACAGCAAGTTCCCCCA
CCR1635	chr7:27213386-27213426[-]	GCTCCTACTGCCTCTACGACTCGGCGGACAAATGCCCCAAA
CCR1636	chr3:170610791-170610831[-]	TGATAAACCAGGGTTTTAAATCAAACAATGTAGCATAAAGT
CCR1637	chr13:108883473-108883513[+]	ATTAGGAAGTCTTTTATCATTGCAGGATTGTACATACTACT
CCR1638	chr16:81413392-81413432[+]	TTAAAGTTTTTTTTCCAGTCTACACCAGGCCTCTCCAAGGA
CCR1639	chr1:38489942-38489982[+]	GAGCTGTGGAGGTGGACAATTACTGTGAGTAGTCTAGTTGA
CCR1640	chr5:43505949-43505989[-]	ATCAGCAATATGTCTAAAATTGATGCACATATAACTCAGAG
CCR1641	chr18:43843381-43843421[+]	TTTTAGAATAATATTTTAATTGCCAGGCAAAATGGGTTTCA
CCR1642	chr19:40541633-40541673[-]	GAATGCGGGAAGGCCTTTAGTCTCCTCAATCAGCTTAATCG
CCR1643	chr17:74731267-74731307[-]	TGCCTGAAACTGAAACCATGTGCACTTTAATGGAAGGTAAG
CCR1644	chr8:146016742-146016782[-]	GCCCGGGCATCAGGGAACTATGCCACCGTTATCTCCCACAA
CCR1645	chr17:53797331-53797371[-]	AATAGTAAAATAATCCAATATAGCACTTTTGATGATTTTTA
CCR1646	chr22:39814727-39814767[+]	TCTGCCACAGGTACAAACCGTGCACTTTTATGCAAATCGAC
CCR1647	chr7:27170315-27170355[-]	TTAATGACCATGAGCTCGTTTTTGATAAACTCCAACTACAT
CCR1648	chr5:137518106-137518146[+]	ATACATATGGAGTCACTAACTCAGGGAAAACCCACACGATT
CCR1649	chr11:94899118-94899158[-]	TAAGCCTTTTCAACTCTTAATGCCCTCCACATGAATCAGCA
CCR1650	chr1:225590900-225590940[-]	AAAAATCCGAAACTTTCTTTTGTTGCACTGACAGGGTCTGT
CCR1651	chr1:155927644-155927684[-]	CTGACTGGCAGGACAAGCCTTCAGTGGTATCGCTGCAGAAT
CCR1652	chr8:74585342-74585382[-]	TATAGAGCTAATTACAACTTTCGGGGCATGTACAATCAGAG
CCR1653	chr1:166826910-166826950[-]	AGGGAAGTCATCCCTACACATACTGTCTATGCTCTTAACAT
CCR1654	chr9:95377357-95377397[-]	CTGTTCTTTCCCACTAAAAATTGCTGCTGTAGAAGTTGGAG
CCR1655	chr5:61877518-61877558[+]	GCTTTCAGTTTTATACTATATTGCTGCTTTGGTTCTAGGAT
CCR1656	chr5:58268758-58268798[-]	GAACTACTTCTTTAAACACATGGAGGGAAAGAAGATGATGC
CCR1657	chr14:74666235-74666275[+]	TATCTGTTTTTTAAAACTTCTATACCTCTTATGATAGTCCC
CCR1658	chr1:45241703-45241743[+]	CAGGCATCTCTCGGGACAACTGGCACAAGCGCCGCAAAACC
CCR1659	chrX:73641832-73641872[+]	TGTCGGGATCCTCTACTCCATGCTGCTAGAGGAGGAAAAGG
CCR1660	chr16:70298861-70298901[-]	CCCAAAGTACAATTACCATTTGGACTCCAGTGGTAGCTATG
CCR1661	chr10:27435855-27435895[-]	CCTTTAACTGTCTTTTACTATGTGCTGTCATGTTGTATGCT
CCR1662	chr3:49693574-49693614[+]	CTCGACTATCAATACCCCAATTGCTGCAACACTGCCCATCA
CCR1663	chr13:113622182-113622222[-]	ATCCGTGTACCATTCCGGCATTTGGCAACAATGCACCAGCA
CCR1664	chr1:155931915-155931955[-]	TGACTCAGCGCATCACCAAGTACCCGTTACTCATCAGCCGC
CCR1665	chr17:45197710-45197750[-]	AACAAATGTAATGGGCATATTGGGACTCGTATGTAGGAATC
CCR1666	chr10:62552020-62552060[+]	GGATGAAAATGGCTTGGATTTGCTCTCGGTAAGGAGTGCCC
CCR1667	chrX:153599289-153599329[-]	GCGGCCCACTTTCCGCCAAATGCAGCTTGAGAACGTGTCGG
CCR1668	chr8:141551361-141551401[-]	GCAGCACCGGCAGGAGATCATACAAGACCTGGCCGCCATGG
CCR1669	chr19:53911298-53911338[+]	GTTGTGAAGTCTATCCACGATGCTTCCTTGGTTTCAACAGC
CCR1670	chr12:11325074-11325114[+]	GGAAAGACATTTTTATTACTTACAGGGTAGCCATAAAGTTT
CCR1671	chr8:145737442-145737482[-]	AGTGATCAGCTCTGACAGGCTCCTCCCCACAGCGTAGCCTT
CCR1672	chr2:216981532-216981572[+]	AGCAAAATCCAACCAGGTTCTCAACAGGCTGACTGTATCCT
CCR1673	chr1:154558649-154558689[-]	TGCAGCCCATTTATCTCAAATCTGTCACATTGGGTAAGGGG
CCR1674	chrX:13792134-13792174[-]	TCACATGGTTCACTACCAAATGACCCTCAAATAAGCCAGAT
CCR1675	chr12:111823064-111823104[+]	AATGAATGACAAGGGCCGTTTGAGCAAGAAGGACATTGAGC
CCR1676	chr8:103266579-103266619[-]	CGACTTTACGTCCCACTCTATTCCTCTAAACAGATTCTCAA
CCR1677	chr13:115092680-115092720[+]	TTTTATGTTTTTCAATTATGTTACTGTAAATACCTTGTACC
CCR1678	chr15:32930558-32930598[+]	CACCACGCCCGGCTAGACTTTACCTTTCTAAAGAAATTGTT
CCR1679	chr12:101019809-101019849[+]	CTGCATAAACTCCATCAACCTAAGGTGATACTTGTAAATAA
CCR1680	chr8:41791391-41791431[-]	GCAGTGAGCATGAGGGCGCCTACCAGGACTGTGAGGAAACT
CCR1681	chr6:111693858-111693898[-]	GGGAAGAAATTATGGCAACTTTGTTGGATCATGACCTGTCT
CCR1682	chr7:6731111-6731151[-]	CTACCTGAATTCAGCCCTCATGAGACATCAGAGAGTGCACA
CCR1683	chr12:57623557-57623597[+]	TTGCGATGCTGTACTTCTCTTTGTTTTGGGCGGCTCGGGTA
CCR1684	chr5:138643959-138643999[+]	ACCGAAGGGTTATCCCCATCTGTGCTCTATATGTGATTTGC
CCR1685	chrX:39922854-39922894[-]	GAAGAGTCTCTTAAACCCAGTGACAATGAACAAGGTATGCG
CCR1686	chr20:61921109-61921149[+]	GACAGCATTCCAATAAAGCATACGGGAACATGCAGAATGTC
CCR1687	chr22:29752543-29752583[-]	CGCTCTCAGAAATTGCCGAGTCTCACCCCAGCAGCAACCTG
CCR1688	chr12:121248640-121248680[-]	CCTGGTGGATTCCAGTCAAGTGTCTACATTTCTGATTTCCA
CCR1689	chr2:204298934-204298974[-]	CAAGGAACTTCATTATAATGTACCAGGTAGAGGACATTATT
CCR1690	chr9:135277392-135277432[-]	GGATGATGAAACTCCACAACTACTAGGACCTACTCACAAAA
CCR1691	chr8:22368643-22368683[+]	ACATTTGACTGTCTTCCTCTTGCTGCCCTCTTAAACCAGCA
CCR1692	chr3:53381457-53381497[-]	GAAGCAACACGACCCCTATATCACCAGCATCGCAGACCTCA
CCR1693	chr11:11373830-11373870[-]	ATCCACGTTTCAATGATATCTTGGGCAGACACTCTCGAAAG
CCR1694	chr5:176734214-176734254[-]	TCACATAAACTGTACAGTATTTTCATTAAAAGCCTCTTTCA
CCR1695	chr10:129900963-129901003[-]	CTCCCAGGGCAAGAGGCAAATCATCCGAACCCGTGGTCATC
CCR1696	chr1:78201795-78201835[-]	AATACCCAGTAATACAACATTAAAAACTCCTCTGGTTGCCG
CCR1697	chr19:15533057-15533097[-]	TCCCTAGACCTTTCACTTTTTTAAAAACGCGTTTTGTGTAG
CCR1698	chr4:153244216-153244256[-]	AGAACTTTGTAATTACCAGCTCAGATGATGGAACTGTAAAA
CCR1699	chr16:70695102-70695142[-]	GATTCCAGTATTAATAAAGGTGTACTGTAATTAACACCCCT
CCR1700	chr6:31498085-31498125[-]	CCCTGACAGCCCCCACCCCATGGCTTCCATCTTTTGCATCA
CCR1701	chr8:79514807-79514847[+]	AGACATTTGAAAATATCCATTAATGTGAATATCACCTGAAT
CCR1702	chr2:175938806-175938846[-]	TTTAATCTTTTTGCCTTTTATTTTGCACATTATGCAAAAGG
CCR1703	chr9:20411146-20411186[-]	GGACTGCTAGTGCTCTCCGTTACAAGTATCCCCTGTTACCT
CCR1704	chr7:5567350-5567390[-]	AAATGCTTCTAGGCGGACTATGACTTAGTTGCGTTACACCC
CCR1705	chr18:9734911-9734951[-]	GCAACTGGGCTACTATAAAGTTCTGGGAAAGGGAAAGCTCC
CCR1706	chr12:69244096-69244136[+]	CGTTGAAGTCTAGGTAAATATACCAGGGAACTTCTGCTTAA
CCR1707	chr10:21785844-21785884[-]	AGCCAAGTCTCCCACCTCTCTGCTCGGTTTCCCGCCCCACC
CCR1708	chr3:101284410-101284450[+]	ATCAAGAAAAATGGGACAAATTGCTTTTAACATCAACAGAA
CCR1709	chr13:41705167-41705207[-]	GTAATTCGAGACTATCTCTATGCTCTCAACAGTAAGCGCAT
CCR1710	chr1:160061618-160061658[-]	TGGTACCATCACTTGCTGCTTCATGAAGAGGCTTCGAAAAC
CCR1711	chr12:6939045-6939085[+]	CTGCGGCAGCACACACCTTCTTTGTAGCAAACCCCATGCAC
CCR1712	chr1:6281245-6281285[-]	TTCTTAAATAAAACTGCACTTGATTTCACTCAACCACAGTG
CCR1713	chr10:129901848-129901888[-]	CAGTCAAGTTCACACAAACATCAGGGGAAACCACGGATGCA
CCR1714	chr4:110745612-110745652[+]	AGTTGACTTCTGCATTAACCTGCATGATCTGTTTCTACTAT
CCR1715	chr17:27870054-27870094[+]	AGTGGCAATTCCGCTGGAGCTGTCTGCCAAAAGAAACTGCC
CCR1716	chr9:74969431-74969471[-]	ACAGATAGTTCATATTTATGTATTGCACATAATCATGCTAT
CCR1717	chr3:128852915-128852955[-]	GAGGAAGAGATCAACATCTATGCAGTCACCGAGGAGGAGGT
CCR1718	chr8:103846426-103846466[-]	TGTTAGACATTGGTGGAGGATTCACGGGAACTGAATTTCAA
CCR1719	chr1:24857850-24857890[+]	ATGGGCAGAAGCTAAAGCTATATTTTGCACAGGTACTTCAC
CCR1720	chr3:10312650-10312690[+]	GCTTGGATTACTCTTACAAGTGCACCACGCCTGTCCCAGAA
CCR1721	chr11:67924275-67924315[-]	TAATTTGGTTCTTCAAGTTTTCTGTTGCACTTGTAAAATGC
CCR1722	chr22:36906930-36906970[-]	GGAATGTGTGTCTAACTTGCTCTCTGACATTTAGCAGATGA
CCR1723	chr5:141350291-141350331[+]	TGTAGTATGAGTTCCACATCTTGGCCTCTTACCCAGCTTCA
CCR1724	chr6:47199872-47199912[-]	TTTGAGTTATCTTTTAAATATGTCTTGTATAGTTCATATTC
CCR1725	chr3:45561726-45561766[+]	ACAGAGGACTTCTCACTGAATTCTGCAATTTCTCAGCTGAT
CCR1726	chr13:110407110-110407150[-]	AGAATAATGCATTAATAAAATGAGGCTTTTTTAGAGGAAGA
CCR1727	chr10:5789800-5789840[+]	AATGCAGGTCTCTGCCGAAATGCCTCTAATATTAACTGATC
CCR1728	chr21:34923572-34923612[+]	ACAGCGCTGGAATCCTATAATACGGTAGCACAGGAGCTGCC
CCR1729	chr9:98774662-98774702[+]	CTGTGTCACAATTCAACAATTCTTCCTTTGAGAAAGGAGAG
CCR1730	chr5:176492945-176492985[+]	CAAATAAAGAATTTCCCTCATGGGCCAGACTACAACTTAAC
CCR1731	chr9:123550061-123550101[-]	GGACACAGTGCCAGAGTGTATGCACTTTACTACAAAGATGG
CCR1732	chr1:211918707-211918747[-]	TACAGTAACTTATTTTATGATCGGGTGATGAGACAGTTATA
CCR1733	chr20:55983191-55983231[+]	CTTCTCCTGCCTCTCCACACTCCAGGTTCCCTCAGGCTTGT
CCR1734	chr6:12164784-12164824[+]	ATAAACTCATGACTAATCTTTGTGCAATCATGAACTTTTGA
CCR1735	chr21:45451978-45452018[+]	GAGATCAGAATTTATTTACCTCTGTTTATCCAACGCTCTCT
CCR1736	chr1:223963484-223963524[+]	TTGCCTTATCTTCTTCCAAATGTACTGTTAAATAAAAATAA
CCR1737	chr4:41265269-41265309[+]	ATTCTGTTTAACAACGTGGATGGCCACCTCTATGAACTTGG
CCR1738	chr2:86830942-86830982[-]	ATGATGTCCCATCTTAACCATGTGCAATTTGTCCTTTATAA
CCR1739	chr6:136599420-136599460[-]	CCGAAAGATACATTTGAACATGACCCATCTGAGTCTATCGA
CCR1740	chr20:61833759-61833799[-]	ACAACAAACCGGTCACAAACTCCCGGGACACCCAGGAGGTG
CCR1741	chr17:33690139-33690179[-]	ACAGTTCTCTACAAAACACTTCCAAGAATATGTAAAAAGGA
CCR1742	chr20:36641408-36641448[-]	GGTCCAAGCAAAACCTGCAGTTGAGCACAGAGTAGCAGAGC
CCR1743	chrX:39932375-39932415[-]	GTTGATACCACACACGCCCATAGAGATTACTAAAGAGGAGA
CCR1744	chr10:18969059-18969099[+]	GTAAAATTTTAATTAAAAAATTACCTCATTTTTCAATCCAT
CCR1745	chr16:72122975-72123015[-]	TAAGTAAAATGGCTGCTATATACCTGGTAGATGTGGACCAA
CCR1746	chr21:15750519-15750559[-]	AAACAGAGAAATTCAACAATTGAAGCTGCTAACCTTGCAGG
CCR1747	chr1:227258128-227258168[-]	TGTAAGAATTACTTGGGAAATTGTGCATTTAAAGTTAATGC
CCR1748	chr8:145661684-145661724[-]	TGCCCAGAACCCCCCTCTAATAGCACTAGACTCCCAGAGGC
CCR1749	chr19:41263328-41263368[+]	CTTTGTCATCTTCAAGGAGGTCAGCAGCGCCACCAACGCCC
CCR1750	chr9:134375177-134375217[+]	CCGTGATCTAAAGGGGACACTGTACTCAAGCTTTTGACCTC
CCR1751	chr17:78111235-78111275[-]	GGGAAGCCAACTTCACTGTATCCTCAATGCATGGAGACATG
CCR1752	chr17:30697302-30697342[+]	CCAAGGTCATGTGACTTTTCTGTACTGTTAAACTTCATTGT
CCR1753	chr2:10271299-10271339[+]	GATTATATGGTCCTTATATGTGTACAACATTAAAATGAAAG
CCR1754	chr3:69058838-69058878[-]	CCGCTTGCCAGAGGAGCACATTCCCTTCTTTTTGCACAACA
CCR1755	chr11:93431807-93431847[+]	TTTGAGAGTTTCACAACATATGCTACCTCTACAAGATAATT
CCR1756	chr20:57441294-57441334[+]	AAACTTTCAGCAACTGATCTTTCAAGACAGACAGTTAGATT
CCR1757	chr21:43411753-43411793[-]	ACCCACCGAAAACTTTTCTTTGCCCGTTTTGGACCACAATG
CCR1758	chr20:49509683-49509723[-]	CATGGTCTGTCTTGTCCATATTGCCGTTCAACTTTCAATGA
CCR1759	chr7:6523749-6523789[-]	GATCTCGCCATCTTCGCCGCTTCCTCTCAGGGGCCGCCGCC
CCR1760	chr6:26199765-26199805[+]	GTGGACGAAGTGTTTATTTATCATGCCTGAACCTGCTAAGT
CCR1761	chr10:75276774-75276814[-]	AGCACAAAGGGGCTTGTCCGTTCTCTGGCTGAGCAGTTCCA
CCR1762	chr7:139246895-139246935[-]	CGTGCAACAGTATTTTCTCGTGTACCTCTTTTTCCTATGTG
CCR1763	chr3:52263961-52264001[-]	ATGCTGCCCGCTACCACTTCTTCCTCTACAAGCACACCCAT
CCR1764	chr2:10188590-10188630[+]	ATCACCTCTAGCCAAAACTGTGTCCCTCAGGTAGACTTTTC
CCR1765	chr19:10426908-10426948[-]	CCAGTCTCCCCACACGGACCTTTGCTGAATTAAAGTTTGTA
CCR1766	chr7:116200667-116200707[+]	TGAACTCAAACTGAGGAATTTCACCTGTAAACCTGAGTCGT
CCR1767	chr10:126660621-126660661[+]	CATCAGAGAAAGGGGGATTTTGCTTGCTATTTTCTGACTGA
CCR1768	chr16:81009737-81009777[-]	TTCACCATGTTTATTCCCTTTGCCTACAACCAGTTAATATC
CCR1769	chr22:35689874-35689914[+]	TGAATACAGGCTTGGGATTCTTTTTTCTCCTGTGGTGGATA
CCR1770	chr3:160135586-160135626[+]	GAACTTGATATCTATCTCAGTCGTCATAATACTGCAGTGTC
CCR1771	chr19:32949048-32949088[+]	CTGAAGGCAAAATTTGGGCTTGGAGCAACAAGGTATAACTG
CCR1772	chr4:1694788-1694828[-]	GACATTGTTAAATTGAGCTATTAAACTAATGAGTTTTATGT
CCR1773	chr3:12880744-12880784[-]	GCAGGAACTCTACAAACTCTTGGGATGCATTTTGGCGGGGG
CCR1774	chr19:19010328-19010368[-]	CCCCCATCTGTTAATAAATATCTCAACTCCAGGGTGTTCCA
CCR1775	chr1:200828609-200828649[+]	TATTATAAGGCCTTTAGGCATCAGTGCATCTGGGTTATCAA
CCR1776	chr12:57620132-57620172[+]	GTCGAGCTCCACCTGCCCTCTCCTGCTGCTTCCTCTCGGTG
CCR1777	chr1:19934803-19934843[+]	CGAGATGAATCCTCGCCATATGCTGCTATGTTGACCACCCA
CCR1778	chr7:106842709-106842749[+]	ACTTACTGCAGTGCAACACTTGCACTTTAATTTTCCTCCAA
CCR1779	chr4:85571060-85571100[+]	AGATGAGAGTAAATTTCTTATCCGTGGACGTATGTAAGCTA
CCR1780	chr4:41258990-41259030[+]	GAAGATGCAGCTCAAGCCGATGGAGATCAACCCCGAGGTGA
CCR1781	chr19:44417497-44417537[-]	ATATGTTTTACTATCTCAGATGGGTGCTGAAATATTTTAAT
CCR1782	chr17:61897672-61897712[-]	GTAAGAAGGAGGTGGAGCATTACCGGAAACGCTGGCGGGAA
CCR1783	chr17:19237282-19237322[+]	CTCGGCCCCTGTTAACCCTTTCCAGGTGAACCAGCCCCAGC
CCR1784	chr10:95462175-95462215[-]	CCGTGGGTCGTCGCTGCAGCTGCCGGGAAAGAAGGAAACGA
CCR1785	chr17:65850328-65850368[+]	CGTGAAGAAGACACTTCCAATACTACCTTTGGACCTGCTGA
CCR1786	chr1:6285207-6285247[-]	GAAGAAGAAATCTCACTAATTCACTTTTTTGGAGAGGAGTA
CCR1787	chr11:59574218-59574258[-]	CCTGACAATCAACCGCTCTATGGACCCCAAGAACATGTTTG
CCR1788	chr5:138666075-138666115[+]	AAAAAGAAAACCCTAGGCCATGTTAATTGGTTATACATGTT
CCR1789	chr19:2037494-2037534[-]	CAACTGTCAATGCCGGAATTTTGTATTCTGTTTTGTAAAGA
CCR1790	chr13:67800198-67800238[-]	GGAAATGCCTCCTATATCTATGACTTGATCCGCAGGACTAT
CCR1791	chr1:110172052-110172092[+]	CCTATGCCTACTACCTGTACTACACCTTTGCCAACATGGCC
CCR1792	chr3:142775819-142775859[+]	ACTAAGATGACTATCCAAATTAAGGGACCTGAGACTCCTAT
CCR1793	chr15:38645394-38645434[+]	TATTTGAAGCTCATTTTCTATGCAGGTTTTTAAACGTCATT
CCR1794	chr7:94294571-94294611[+]	TGGGCTAATTACTCCAACGATTGCACCTAATGGAGCCCAAG
CCR1795	chr7:5103616-5103656[+]	ATGTGTGAATTTAATCAAAATGGGGATACCTATTCTCACAA
CCR1796	chr13:79951599-79951639[-]	TTTGTGGAAAAACTTTTTGATGCTGTGAATACAAAGAGTTA
CCR1797	chr11:57583803-57583843[+]	GGGCTTATATGTACTTTTATTTTTTGGTGGTGAAATTGACT
CCR1798	chr2:37480337-37480377[-]	ATACCCAAAGCACTTCATTATGGCTCCTAATCCAGATGATA
CCR1799	chr1:11114699-11114739[-]	GCGTTCCACCTCCAAGCCTATACCAGCTGTGTACAGCGCCA
CCR1800	chr2:101883162-101883202[+]	CCCCAAACTTGTCTACCATATTGGCCTCACCCCAGCCAAAC
CCR1801	chr2:174771410-174771450[-]	AATTGTAGTTTAAATTCCAGTACTGCCTACTCAGACCCAAA
CCR1802	chr3:77259654-77259694[+]	AAAAAGTATTCACCATATATTGCTCGGTAAAGAAACATCAA
CCR1803	chr5:58269666-58269706[-]	GATTCATTGTTTGTTTTATATACCAATGACTTCCATATTTT
CCR1804	chr2:10584658-10584698[-]	CCTCGTGTCACCCCCTTTTATGCAGTCAAATGTAATGATAG
CCR1805	chr1:154574171-154574211[-]	ATCTGCGACTATCTCTTCAATGTGTCTGACTCCTCTGCCCT
CCR1806	chr7:138986220-138986260[+]	ACTCCAGTGATCTATCATATTTGCTGCTACATTTGTAAAAT
CCR1807	chr20:60883835-60883875[+]	GAGGAACTGGGCGCTTGCAGTGCGTTGCACACCCTCACCTC
CCR1808	chr15:91522442-91522482[-]	TTGTGCGGTTAAAAAACTACTATGAAGTTCACAAGGAACTC
CCR1809	chr16:23598529-23598569[-]	GGACCGTGTTCTTTACGTATTGAAACTCTATGACAAGATTG
CCR1810	chr15:72500966-72501006[-]	CATCAAGATTATCAGCAAAATCGAGAATCATGAGGGGGTTC
CCR1811	chr13:30777431-30777471[-]	CTATGCAGATTTGTTTCTTTTAAGCACATCCTTCCCTCCTG
CCR1812	chr4:25279273-25279313[+]	TTAATTTCAAAAGCTGCTATTTTAGAATTTGAATAAGTACT
CCR1813	chr12:133402486-133402526[+]	CCATTCGAGGGCGGATCCTCTCTGGCGTGGTGACCAAGATG
CCR1814	chr8:67475358-67475398[-]	AAGTTCTCAAGTTAACTAAATGGAATCAACCATTACCAGGC
CCR1815	chr7:26252765-26252805[+]	CCTTTTGTAACCTAACCTATTGACCTGCATGTTTTTTCTTT
CCR1816	chr13:53035272-53035312[+]	CTTCAAATGAACTAACCAATTCAACTGTAGTAATTGACACA
CCR1817	chr5:121363170-121363210[+]	TAAATTGATTTTTAATAATATCCCTCAGACTGTTTCCCTTA
CCR1818	chr1:204374896-204374936[-]	ACCTTTTTGAGTTGTCATTTTGCACTTTCAAAACTTATTTT
CCR1819	chr17:40173629-40173669[+]	CAGGCGTCTGTGGGCAAAACTTCAATCCTGGAGCAGCTTCT
CCR1820	chr4:435995-436035[-]	AACGAATATAAGAAAATTCATACTGGAGATAAACTCTACAA
CCR1821	chr22:32352715-32352755[+]	TGCGAGACAACCTCACCCTCTGGACGAGCGACCAGCAGGAT
CCR1822	chr11:102267445-102267485[-]	TATAATTTGTTACTTTCAAATACCCGTACTTTGAATGTAGG
CCR1823	chr12:53805039-53805079[+]	GGCCAGAGACATATGGGCCATACCCCTTAACCCCGGGATGC
CCR1824	chr1:169346002-169346042[+]	AAAGCTGCTATAACTCATGATATCCCCAACAAAAATACAAA
CCR1825	chr1:38300758-38300798[-]	AACAAAGGACACTCATACAATGCACTTCCACAACACAATGG
CCR1826	chr7:50512028-50512068[-]	TTCAAAGCGTATCTTCACTTTCCATGTTAACATAAATGTCC
CCR1827	chr12:109895428-109895468[-]	ACAACAGAAGTAACAACAAATACTCATATACCAGGTAAGGC
CCR1828	chr1:201969103-201969143[+]	GGAAAACCCACTCAACAAGCTCCGCGTGAAGATTGAACCAG
CCR1829	chr9:116170657-116170697[-]	CTCAGGAAAAACTGGGGCTTTGCTTATGGTCAGCCTATGTT
CCR1830	chr6:136599205-136599245[-]	TTCTCAGCATTCACATTCCATTCAGCATAGTCCTGAAAGGT
CCR1831	chr6:35227906-35227946[+]	AACCGTTGGTTATTATTCATTGGCTGCTAACCCAGGAATTT
CCR1832	chr22:32110454-32110494[-]	CAGGATTCAGATTTCCCAGTTACTGCTGCTTCTACAGTGGA
CCR1833	chr3:141012710-141012750[+]	GGCTATACTACAATTGCACTTCCAGCACTTTGAGAACGAGT
CCR1834	chr2:182794936-182794976[+]	GTGCCTTATGTTAAACACTATGTACTTTTACTTTTTGCATT
CCR1835	chr1:114308068-114308108[-]	TATTTAGTTCTAACCACAAATAACAAGTAGTTTCCAAGGAA
CCR1836	chr6:136597581-136597621[-]	TTCCTGCTTGATAGGGGTAATACCAGGGATAAAGAGGCTTC
CCR1837	chr15:83659635-83659675[+]	TTTACAATGTTATATTCACTTCCAGATGCATACCTCTGCTG
CCR1838	chr7:157002309-157002349[+]	GTTAATAAAGCTTTCCATGATGTGCAATATCAGGTGTTGTG
CCR1839	chr4:77959295-77959335[+]	CACTGACAGGACACATTCTTTAGTGGGAATTAAGACCTACA
CCR1840	chr1:245020052-245020092[-]	CAGTGTCTTGGGAAATTTATTGAGATTGCTGCCCGAAAGAA
CCR1841	chr17:27844632-27844672[+]	GTTACTTGGGCGTCATAACTTAGAGCAGGACCTTGTCAGGG
CCR1842	chr12:112229121-112229161[+]	CCCTGGTGTGGTCAACATTGTGCCTGGATTTGGCCCCACGG
CCR1843	chr10:27450021-27450061[+]	AGGGACTTGAAACCGGACAATATGCTTATTTCTAATGAGGG
CCR1844	chr5:40759982-40760022[-]	AGAGGAACTTTTCTACCAGGTTGGGGCATATGGGAGCTTAA
CCR1845	chr1:36762243-36762283[+]	AAAACATAAGGAGAGAGATCTTAAACGAGGTAAATCGAGAG
CCR1846	chr6:33180372-33180412[+]	CCATCTGCTGCCTTTTCTATTGCCCTGCAACGTCCCATCTA
CCR1847	chr22:35689611-35689651[+]	AGACAACATTGCTTACATCATGCCGGGACTGTGACAGCAAA
CCR1848	chr15:49283627-49283667[-]	GGCACATGTTGACAGGTGAATAACTGTAACCGATTGTATGA
CCR1849	chr10:33623352-33623392[-]	ATCGCTTAGATTCTCCTCTTTGCTGCATTTCCCCCCACGTC
CCR1850	chr4:6643561-6643601[+]	TGTCTCACTTAACACTACGTTTTCTGCTATGGTCTGTGGTT
CCR1851	chr4:159829093-159829133[+]	AATAGATACCAATGTCATTGTGTGGGAATTTTTTTTAACTT
CCR1852	chr19:1434705-1434745[+]	CGCCCCGAGCTCACAGGACTTTCTCCCCCAGCAGGTTACGG
CCR1853	chr15:65952052-65952092[+]	ACTAAATCTGTGCAATAATATTCCCTAGGGATTAAAAGTAG
CCR1854	chr7:99688030-99688070[+]	GTGTTCAAGGAGCTGGAGTTTCTGGGTTGGTATACCACAGG
CCR1855	chr20:48263585-48263625[-]	ACCTCCCTAGATTATCCTCTTGACTTGAACCACAGTGAAAC
CCR1856	chr19:6378387-6378427[-]	TGTGGCTGGAAACATTAATATGGCTGGAAATGGAATTTGCC
CCR1857	chr10:8006287-8006327[+]	ACAAAGACTAAAACTAGCTCTCCAGGACAGAAGACTAAATC
CCR1858	chr9:115389236-115389276[+]	TTAACCACTGCTGCTATCACTTATTGTAGTTAAACTGAAAA
CCR1859	chr5:77806033-77806073[-]	GTGGACTCCTGACTCTTTCTTCGCCCGGAACATCAATATGT
CCR1860	chr20:62271210-62271250[-]	GGCTGTCCACATCTGGCTTTTGTGGGACTCAGAAAGGGAAG
CCR1861	chr9:32543711-32543751[-]	TTTAGACGAACTCTTTATCGTGCTGGTGCTCGAGTTAGAAA
CCR1862	chr13:25908279-25908319[+]	TGTGTATGAAATCATGAGCATCGATAACGTGGATAACGTAG
CCR1863	chr11:3038336-3038376[-]	TGCTGGAGAACATCGCCCTGTACCTCACCCATATGCTGAAG
CCR1864	chrX:106956450-106956490[-]	GAAATTTCAATAAACTTTGCTCTGTTTTTCTAAAAATAAAC
CCR1865	chr15:82443922-82443962[-]	AAAGGAGAATCTCCACTCACTGACTGCTATGGACCTTTCTC
CCR1866	chr12:69973476-69973516[+]	TCTGATTGGAGTTCTTTTCATGCTCACTTTCCCCTTATTGC
CCR1867	chr11:9610317-9610357[+]	GTCAGGCTTTCATCTAATCTTACCAGTCTGTCTTCTGTAGG
CCR1868	chr19:36605700-36605740[-]	TACGAGCCGGGCTTCGTGGGTATTCGCTTCTGCCAGGAATG
CCR1869	chr12:98989368-98989408[+]	AAGCATGACTGACTGTTAAGTTATAAGATATAGTCATCTAA
CCR1870	chr21:34003207-34003247[-]	TGGGCATTAGTATTTCATTATGTGCAATAAGTCATTGTAAG
CCR1871	chr20:1424401-1424441[-]	AAGGAAGCCAACCTGCTCAATGCTGTCATCGTGCAGCGGTT
CCR1872	chr19:14581554-14581594[+]	GATCCTGACACAGTGCTCCTTCCTCCAAGCTGCTTCGGAGG
CCR1873	chr1:55181530-55181570[+]	AGCCGCTCGCTTCACGGCGCTGGGACCCGGGCTGGAAGGCA
CCR1874	chr17:70120986-70121026[+]	GTGTATGATTCATTACCATTTTGAGGGGATTTATACATATT
CCR1875	chr9:131476384-131476424[+]	CTTCTCTAAACGCAGAGGTGTGGAGGGAATGGGGGCTATGT
CCR1876	chr20:62221161-62221201[-]	ATTTTTCCATCTGTTGCTTATTAATACTGTTTACACATTGG
CCR1877	chr14:23502763-23502803[-]	GATAGAGATCAACCCATACCTGCTAGGCACCATGGCTGGGG
CCR1878	chr20:44429749-44429789[+]	CCCAGATTGACCCATGAGCTTCCAGGAATAAAGGTCAGAGT
CCR1879	chr4:174252670-174252710[-]	TAAAACCAAACATGCTCATATTTGCAAAATGTTCTTTAAAA
CCR1880	chr8:57074311-57074351[-]	ACTTGGGCTACAACTCTTCATGGTGCTACAAACTTCTCTGT
CCR1881	chr17:42293993-42294033[-]	GCATGAAGAACAACCTTCCATCCAATGACAGCTCCAAGTTC
CCR1882	chr9:35710625-35710665[-]	ATGACTGGCATCTCCCAAAATGCCAAGAACGGAAACCTGCC
CCR1883	chr20:44038989-44039029[+]	TTTGGCTTACTCCTGAGATATGATTTGCAAATGAGGAGAGA
CCR1884	chr18:56819799-56819839[+]	GACCTCCTGTTCCTCACAAATTTCCGGGAAGACCCAATCAG
CCR1885	chr12:124109323-124109363[-]	GTTGTTGAAAACGGAGGAATTATTAACAAGGTAAGAGCATC
CCR1886	chr11:66131736-66131776[-]	TGCCTACTTCATCACCTTCATGCTGCTCTTTGCCGTTTCTA
CCR1887	chr2:86831312-86831352[-]	CAAAGCGTACTTCACAATTCTCCAGGAACAGCAAGTCACTG
CCR1888	chr4:128811092-128811132[+]	CAGAAGGACACATCAAAAAATGCCTGGACTGATACAAAAGT
CCR1889	chr3:101284102-101284142[+]	AGCAAAAAATATCAAGCTGCTAGAAACCACTGAGGAAGATA
CCR1890	chr1:85116077-85116117[-]	TTACTAAATCTCTTCCTGCTTCACCTTCCACTTCAGACTTT
CCR1891	chr1:36074976-36075016[-]	TTTGCAGACCCCATATCATGTGAACCTCCTCCTGGCTGGCT
CCR1892	chr22:28146594-28146634[-]	AAACTTTTGCTTAAGCCTTTTTCCTCTAGATACTCCCCATG
CCR1893	chr8:12580081-12580121[-]	TATATCTGTCCTAATGCTTATATTTGCACAAGTATGTAAAA
CCR1894	chr3:49070405-49070445[-]	CTGAAAGCCCTAACCCCACTTGGCTGCATTTTATTTGGTAA
CCR1895	chr16:22092336-22092376[+]	AGAAGGAAAAAAAAATGCTTTGGTTTGTTCTCACTATGCAC
CCR1896	chr2:216995667-216995707[+]	AGGGGAAGTGCTTCTCTGTTTTGGGATTTTGTAAATCTTCT
CCR1897	chr2:205436292-205436332[+]	TTGTTTGCATTTTTAATTTATACGGAAAATGAATTTTTCTG
CCR1898	chr12:77415196-77415236[-]	GTATGTAGGTATTAATTTTATTGCTGCTTACTGCTTTTGTT
CCR1899	chr13:76169093-76169133[+]	TTAGTTCATGTAGATGGGCATCTCTATGAATTAGGTAAGAA
CCR1900	chr3:49021126-49021166[+]	TTTACTTAGAATGTAACATATGCTGCCTACCCACCTCAAAA
CCR1901	chr1:6293567-6293607[-]	TCACAGCCTGGAGTATACAGTAGCTGCTCTTTCTTCTTGGT
CCR1902	chr17:43003418-43003458[-]	AGGTGTCCTGACCGCCAGAATGTCCTGACCACCAAGGTGTC
CCR1903	chr11:43877028-43877068[+]	TGAATATAGAACTAATATTGTCGGGAACACCTAATAGAAAG
CCR1904	chr7:128142012-128142052[+]	CGAGCTTTTTTAAAAAAAAATTTGTAGCACCGGGCATGGTG
CCR1905	chr7:92905479-92905519[+]	AGCAATGGATCAACTTCATATGCACTTCACCCAAGCCATTC
CCR1906	chr12:21807515-21807555[-]	AACAGTTCCAAACAATAAGATCACTGTAGTGGGTGTTGGAC
CCR1907	chr11:67924352-67924392[-]	TGCTTATTTTTTCAAAAATTTGCTGTGAACAACGTGATGAC
CCR1908	chr13:45725827-45725867[+]	ATTTACTTTGAATGAGGATCTTGCAAATATTCATGATATTG
CCR1909	chrX:62569216-62569256[-]	GTAATACATACTGGTGCTTTTATTTATATAGGTTGGATTCC
CCR1910	chr1:156281875-156281915[-]	GAATACTTTACTTTCATCACTGACTGCAAAGACCCCAAGGC
CCR1911	chr19:47112628-47112668[+]	GCCCTCGCCTCTTCCATCCATGTCTTCCAAGGCCTGATGCA
CCR1912	chr19:59060904-59060944[+]	CAGTGCCACCATTTGCCGTGTCTGCCAGAAGCCAGGCGATC
CCR1913	chr17:8110541-8110581[-]	CGCTCAAGGTCCTCTTCAAGTCCCAGATAGAGAAGGAGGGC
CCR1914	chr19:19790790-19790830[+]	CTCACACTGGAGAAAGACCTTATGAATGTAATAAATGTGGT
CCR1915	chr8:17426563-17426603[+]	GAAAAGCCATCGGCCTCCAATACCCATGATGACAGAGGGAG
CCR1916	chr3:107245215-107245255[+]	CTCCCTGTGTACTTTCCATTTGCCTTCCTGGGTAAGTATGC
CCR1917	chr11:10820548-10820588[-]	AAGAAGATATAACCCAAGAGTTTCCGGGAAAAGGCAAGGCT
CCR1918	chr5:112173890-112173930[+]	ACAGAAAATCCAGGAACTTCTTCAAAGCGAGGTTTGCAGAT
CCR1919	chr20:61541304-61541344[-]	GAATGGTTTCATGGCGATTGTGTGGGCATTTCTGAGGCTCG
CCR1920	chr1:39470125-39470165[+]	TTTTTTGATCTTGGGGATTCTGGCTGTGAATTTGGTGCACG
CCR1921	chr10:71152030-71152070[+]	GTGGACGAATATTCCCTAAATGCTGGGAAACAAAGGTAACC
CCR1922	chr19:1421173-1421213[+]	TAAATCAAATAAGATATTTGTCGGTGGAATTCCTCACAATT
CCR1923	chr1:33276581-33276621[-]	AGGAGCGGGAACTTAAAATTTACTGGGGAACGGCAACCACG
CCR1924	chrX:153669452-153669492[+]	CATCTATGGGGGGACATATATGCTGAACAAACCTGTGGATG
CCR1925	chr6:52550946-52550986[+]	TAGAAACACAAATAGCACTGTCACCTCTAATATGAACATTA
CCR1926	chr17:34863289-34863329[-]	TGGAGTGGTCATTCATCAACTACCAGGACAACCAGCCCTGT
CCR1927	chr4:57798355-57798395[+]	AGGTATATTACATTTTATATTCATTTATGATAGCAGACAAC
CCR1928	chr2:128079634-128079674[-]	TGACATAGACAATCCTACTTTGACCGTAATGGACATCAGCC
CCR1929	chr1:36395138-36395178[+]	TTTACCCTGTCAGATGCTGCTACCAAGATTTGGATTGTGTA
CCR1930	chr3:47543312-47543352[-]	TGTCTCTCCAGGGAGGCTAATGCTGGGAACTTGAAACCATT
CCR1931	chr16:48385906-48385946[+]	AAATCGAATTCTTGTCTTTTTAGTGGGATCCTTACTGTCCC
CCR1932	chr3:25542697-25542737[+]	AAGAATATGATTTACACTTGTCACCGAGATAAGAACTGTGT
CCR1933	chr2:120734795-120734835[+]	TGTTTTAAAAAATGTCACTCTTTCAAAATCTATAACTCATG
CCR1934	chr1:32568210-32568250[+]	TATTGGGCAAGGCCTACTCATACTCTGCTAGCCCCCAGAGA
CCR1935	chr19:18685915-18685955[+]	GTGTGGTCACACCAACAACCTGCGTCCCAAGAAGAAGGTCA
CCR1936	chrX:24197843-24197883[+]	AGGATGATGACAAAGGCAACTGTGAGGACTACCTTATGATT
CCR1937	chr1:32799977-32800017[-]	GGTTCTCCTCTTAAGGCCAGTTGAAGATGGTCCCTTACAGC
CCR1938	chr16:2225883-2225923[+]	GGTGGCAGCGTCTACTCCATTGCTGTGACAAATCACCACAT
CCR1939	chr20:3734532-3734572[-]	CTCTCACCTCTGCCTTCATTTGTGCTGCCACCCTGCCCCTC
CCR1940	chr13:42896995-42897035[+]	TGTTTGAATACTATTTAATATCCGGTTTTAATATTGCTGGA
CCR1941	chr5:112336841-112336881[+]	CTTCGAATCAATGACCAGCTTGCTCGTTTGTACATCATTCC
CCR1942	chr13:42893667-42893707[+]	TTCTTTTTGTATCCAAATAGTGCTGCTAGAAACTGCACTGA
CCR1943	chr7:115898563-115898603[+]	CCAGAGACTATGATTTATATTGATTGCACTTGCCTGCCATG
CCR1944	chr19:39330744-39330784[-]	CTGTGACCGAGTCTTCAATGTCTTCTGCTTATATGGCAATG
CCR1945	chr11:110038381-110038421[+]	GTAAATGCTTCTAAAAGGCATTGTGCATATTGACATAACCA
CCR1946	chr1:156498349-156498389[-]	GGGAAGAAGCAGCCTTCTCTTCATTACACTGCTGCTCAGCT
CCR1947	chr1:226455707-226455747[-]	GATGCTGTGGATACTCTTAATGCTACTTATAGAGTAACTTT
CCR1948	chr2:24286422-24286462[+]	GTACCGTACACAGAGGGACTTGAGCCAGTTACCTTTGCTGT
CCR1949	chr10:97031436-97031476[-]	TGGGGAAAATACTAGCAATATGACACACTTGGAAGCTCAGA
CCR1950	chr1:222838979-222839019[-]	CTGTAATGGATAATGCACAGTACACTTTCTTTCCAATGAAA
CCR1951	chr2:42530309-42530349[+]	CACATCACGAAACTTTATTTTACGAGGAACATTTAATGATG
CCR1952	chr20:16717929-16717969[+]	TTCGGATATAATATCAAAAATGCGTGGAACTTTTGCTGACA
CCR1953	chr3:194369424-194369464[-]	GATGAAGATCCCCACCGACCTCCAACATCGGAAGAACTGTT
CCR1954	chr1:29069203-29069243[+]	GGACAGTCTACTCAGAGCTCTGGATATAGTAGCAATTATGC
CCR1955	chr6:116572937-116572977[-]	CTTAATGTGAGCAACTTCTTTAGGCATTTCCTCTTTTCCCC
CCR1956	chr1:226549471-226549511[-]	ATAGCCTGGCTTACAGGGTATGAGCCTTCCCCCAGTTTCCA
CCR1957	chr1:36383288-36383328[+]	GCCATCACACCCGCCTTTTCTGTGCTGACAAGAATGAGCGA
CCR1958	chr3:170784400-170784440[-]	GGGGTGTATGTAAACACCTATGGCCGGATAACTAAGGATGT
CCR1959	chr15:69071868-69071908[-]	AGCAACCTAAAGGCGTATTTTGGCACTGGTCTGGGGACATT
CCR1960	chr3:88205985-88206025[+]	TCATGTGAATACTTACCTATTTCTACCCGAGTTGCAGCAAG
CCR1961	chr19:45889204-45889244[-]	GAGTCTTCCCCCTCCCCCGGTGCACTCAGATGAACGACCCG
CCR1962	chr5:70762966-70763006[+]	TTTGAAAATGAGTTGACATTTCTTTCTACCCTCTTGGAATC
CCR1963	chr19:36032873-36032913[-]	CAGCCCAGACCCTTTCTCCATATGCTGCCCGGGACGTGGAC
CCR1964	chr1:32830850-32830890[-]	ATATTTTAAATTATAATGCATCTCCCCAGAGTATTTTGTAG
CCR1965	chr13:53039497-53039537[+]	AGCTTGTTAAGTATTGGATATGTCTTGCACTTATTGAACCA
CCR1966	chr5:157162847-157162887[+]	CTCACAGGTCACATCAATAATCTTTATAATACAGTTTTCTG
CCR1967	chr12:42706680-42706720[-]	AAAAGTTCATTATAAGGGCTTTATTCATGCCTGATTTGTTT
CCR1968	chr7:105142953-105142993[-]	GAGAAAAGAACCATCATCCATCAGGCTATCAAATCTCTGTT
CCR1969	chr16:2287114-2287154[+]	GAGCAGATCAACAGGTGTGGTGGGCAGGGCCCCTCGTCGCG
CCR1970	chr1:197073307-197073347[-]	AAAAAATGCTACAATAAAATTGCAGTCAACTGTTAAGATGA
CCR1971	chr11:10823252-10823292[-]	TCAGGGACTCTTATCCCAGCTGCAAGGACAGTCGAAGGATA
CCR1972	chr17:27587955-27587995[-]	TAAAGTGTATTTACAGCGTCTGTGGTAGCCAGCCCTTCCTC
CCR1973	chr10:97927916-97927956[+]	GGCCCCATGCACAAGGGCAATGTGCTAATTCTGTTGGAGTC
CCR1974	chr4:39780482-39780522[+]	TGCCTGTGAATTTACTTGCATGCTTGTACTTGACTTCTTAG
CCR1975	chr2:9580644-9580684[+]	AACTACATGACATTCCAATATACTATGCATCATCTTTGGCC
CCR1976	chr1:62911034-62911074[+]	GGACTTGAATCTCCAGGAAATACTGTTACACCTGTAAATGT
CCR1977	chr1:15863154-15863194[+]	AAAAGTATTTATTGCACTTTTCACATTATGTGAATGAAGTG
CCR1978	chr13:51517496-51517536[+]	GCAAAGAGAAGACATTAAAGTGGCTGGAAAAAAAGGTATAG
CCR1979	chr15:67891421-67891461[+]	TTATGTGCTACTTTTCTTCATGCTGCTTTAAAATTTATCAT
CCR1980	chr1:193054276-193054316[+]	CTGAAATGCACTAGACCATATAACTGTGATGAAATATGAAA
CCR1981	chr12:48477480-48477520[-]	AAGTCAAACCATCACTGCCATGTATCTGCATATGAAAAATC
CCR1982	chr21:17251754-17251794[+]	AAATGTTCTCTACTAATTAATACTGTGAAACAAAATTGATG
CCR1983	chr12:110783113-110783153[+]	CTTTGAATCCCCATACCCGATGACAATGGCGCTCTCTGTTC
CCR1984	chr1:93827352-93827392[+]	ATAAGTTGTGTTATAACTTATCAGCCGTATATGGAACATAA
CCR1985	chr7:66453232-66453272[-]	TGCTTAAACTATTTGACATTTTCTATCTTTGTGTTAACAGT
CCR1986	chr15:55497593-55497633[-]	CAGTGAGAGATTAATGGGCATTGTGTACAAATTGCTTCTCA
CCR1987	chr8:22879981-22880021[-]	CTTTTCACTGCACTTGGCATTATTTTTATAAGCTGAATGTG
CCR1988	chr11:59375949-59375989[-]	CTCTTTAGGATAACATCCAATGCCATGATCAACGTGAGTGC
CCR1989	chr14:52196869-52196909[+]	TAAAGAAAAAACATATTTAATTACTGTAAACAGGTACTGCT
CCR1990	chr3:38532206-38532246[+]	CGCCATCTGGGTCCTCTTGATACTGCAGACTTTTAACGTAC
CCR1991	chr17:79849394-79849434[-]	TGGCCGACAAAATGGACATGTCTCTGGACGACATCATTAAA
CCR1992	chr22:30165674-30165714[+]	GGAAACACATCAAGCACAAGTATGAGAACAAGTAGTTCCTT
CCR1993	chr9:94972923-94972963[-]	TGCTTGGATTGAAATTCAAATGGGATTGATTAGTCAAGTAA
CCR1994	chr5:65460656-65460696[+]	ATACTCGCTCAAAATCCAGGTCTAGCTCAAAATCCCATTCT
CCR1995	chr4:169799653-169799693[+]	CCCAGTAACATTTCACACATTTCTCTCCGTGCGATGTAAAA
CCR1996	chr12:123351047-123351087[-]	AAAGTTTGCACTGGGCCCACTGCCGAGTCCAGAGGCCGGAG
CCR1997	chr19:50391426-50391466[+]	AGTGGGCGCTCGGGCGGAGGTGGTTGAGTGCCGACTGGCGC
CCR1998	chr6:31807320-31807360[+]	GAATTTGCTGACACAATATCTTCCGCCTGGTGCTGGGCATA
CCR1999	chrX:70262209-70262249[-]	ATTTTCTGGCCACAAGGGCATAGTGCATTTCACCTAAATGT
[truncated: 15,320 more rows]

## Sheet: AGO binding sites on 3' UTRs
Identifier	Genomic Location (hg19)	Gene Symbol	RefSeq ID	3' UTR Length	Site Position
CCR3	chr15:93586668-93586708[-]	RGMA	NM_020211	1592	1520-1560
CCR5	chr1:16266091-16266131[+]	SPEN	NM_015001	1028	169-209
CCR6	chr12:56636160-56636200[-]	ANKRD52	NM_173595	5335	726-766
CCR13	chr1:244220431-244220471[+]	ZNF238	NM_006352	2106	1759-1799
CCR16	chr3:43391845-43391885[+]	SNRK	NM_017719	2585	1796-1836
CCR17	chr1:25170670-25170710[+]	CLIC4	NM_013943	3387	3242-3282
CCR20	chr4:95210994-95211034[+]	SMARCAD1	NM_020159	1758	309-349
CCR21	chr15:63559850-63559890[+]	RAB8B	NM_016530	4155	4032-4072
CCR22	chr5:115166973-115167013[-]	ATG12	NM_004707	3607	488-528
CCR23	chr1:16721744-16721784[+]	C1orf144	NM_015609	3005	109-149
CCR24	chr7:99635226-99635266[+]	ZKSCAN1	NM_003439	3583	3406-3446
CCR28	chr1:90182343-90182383[+]	LRRC8C	NM_032270	4553	1802-1842
CCR30	chr17:73017298-73017338[+]	ICT1	NM_001545	256	198-238
CCR32	chr16:71763135-71763175[-]	AP1G1	NM_001128	4056	3786-3826
CCR34	chrX:153671692-153671732[+]	GDI1	NM_001493	795	673-713
CCR35	chr3:9542809-9542849[-]	LHFPL4	NM_198560	3850	1046-1086
CCR38	chr1:54387275-54387315[-]	HSPB11	NM_016126	90	9-49
CCR40	chr11:9610528-9610568[+]	WEE1	NM_003390	1164	379-419
CCR41	chr10:72185926-72185966[+]	EIF4EBP2	NM_004096	6871	4423-4463
CCR42	chr13:26787624-26787664[-]	RNF6	NM_005977	1056	297-337
CCR43	chr1:167394211-167394251[+]	POU2F1	NM_002697	11535	9164-9204
CCR46	chr12:122989929-122989969[-]	RSRC2	NM_023012	884	105-145
CCR50	chr2:197701576-197701616[-]	PGAP1	NM_024989	8230	4342-4382
CCR53	chr22:24968002-24968042[+]	SNRPD3	NM_004175	564	57-97
CCR58	chr3:38525206-38525246[+]	ACVR2B	NM_001106	9810	383-423
CCR59	chr4:69179383-69179423[-]	YTHDC1	NM_133370	3712	394-434
CCR61	chr11:92626467-92626507[+]	FAT3	NM_001008781	5356	2188-2228
CCR86	chr2:176974239-176974279[+]	HOXD11	NM_021192	446	369-409
CCR87	chr17:56423314-56423354[-]	SUPT4H1	NM_003168	1068	253-293
CCR90	chr19:17434278-17434318[-]	ANO8	NM_020959	294	8-48
CCR91	chr6:7251245-7251285[+]	RREB1	NM_001003698	3012	2044-2084
CCR96	chr6:117884132-117884172[-]	GOPC	NM_020399	2984	245-285
CCR99	chr19:12811485-12811525[-]	TNPO2	NM_013433	2070	553-593
CCR103	chr5:138208263-138208303[-]	LRRTM2	NM_015564	3620	396-436
CCR104	chr13:42893745-42893785[+]	AKAP11	NM_016248	4038	381-421
CCR105	chr10:81143209-81143249[-]	ZCCHC24	NM_153367	4018	2852-2892
CCR106	chr10:64568119-64568159[+]	ADO	NM_032804	2607	2487-2527
CCR109	chr22:38881258-38881298[-]	DDX17	NM_006386	2497	642-682
CCR111	chr6:121770287-121770327[+]	GJA1	NM_000165	1731	1145-1185
CCR115	chr1:92852648-92852688[+]	RPAP2	NM_024813	1164	80-120
CCR116	chr3:87304465-87304505[+]	CHMP2B	NM_014043	1726	1493-1533
CCR117	chr3:183402246-183402286[+]	KLHL24	NM_017644	5230	5172-5212
CCR120	chr11:28042428-28042468[-]	KIF18A	NM_031217	584	279-319
CCR122	chr18:51904848-51904888[+]	C18orf54	NM_173529	3788	232-272
CCR129	chr12:42480452-42480492[-]	GXYLT1	NM_173601	5940	1096-1136
CCR132	chr2:232672904-232672944[+]	COPS7B	NM_022730	1079	549-589
CCR134	chr10:124691754-124691794[-]	C10orf88	NM_024942	1524	149-189
CCR135	chr20:49369036-49369076[+]	PARD6B	NM_032521	3253	2011-2051
CCR139	chr15:91509621-91509661[-]	PRC1	NM_003981	1093	700-740
CCR139	chr15:91509621-91509661[-]	PRC1	NM_199414	1136	743-783
CCR141	chr20:35626271-35626311[-]	RBL1	NM_002895	984	851-891
CCR142	chr7:105731110-105731150[-]	SYPL1	NM_006754	1299	1101-1141
CCR143	chr13:30086753-30086793[-]	SLC7A1	NM_003045	5066	1824-1864
CCR144	chrX:41208848-41208888[+]	DDX3X	NM_001356	2552	1876-1916
CCR148	chr9:5468408-5468448[+]	CD274	NM_014143	2705	546-586
CCR151	chr1:229729547-229729587[-]	TAF5L	NM_014409	1178	457-497
CCR152	chrX:57934108-57934148[-]	ZXDA	NM_007156	2591	307-347
CCR153	chr17:46138826-46138866[+]	NFE2L1	NM_003204	1904	1823-1863
CCR161	chr2:70508521-70508561[-]	SNRPG	NM_003096	260	205-245
CCR162	chr1:149857534-149857574[-]	HIST2H2BE	NM_003528	1800	236-276
CCR166	chr13:52607591-52607631[+]	UTP14C	NM_021645	2495	2350-2390
CCR173	chr18:60793311-60793351[-]	BCL2	NM_000633	5279	2507-2547
CCR174	chr7:4810802-4810842[+]	FOXK1	NM_001037165	8979	8707-8747
CCR177	chr13:24247727-24247767[+]	TNFRSF19	NM_148957	2713	208-248
CCR178	chr7:123324496-123324536[-]	WASL	NM_003941	2576	37-77
CCR179	chr2:47129987-47130027[-]	MCFD2	NM_139279	3593	2575-2615
CCR180	chr16:28975260-28975300[+]	NFATC2IP	NM_032815	2583	76-116
CCR181	chr5:53839118-53839158[+]	SNX18	NM_001145427	3406	108-148
CCR182	chr4:88998883-88998923[+]	PKD2	NM_000297	2083	2037-2077
CCR184	chr13:108883176-108883216[+]	ABHD13	NM_032859	4023	596-636
CCR186	chr3:52435721-52435761[-]	BAP1	NM_004656	1279	543-583
CCR195	chr11:8969304-8969344[-]	TMEM9B	NM_020644	1027	523-563
CCR197	chr3:42687495-42687535[+]	NKTR	NM_005385	2766	28-68
CCR201	chr7:92236831-92236871[-]	CDK6	NM_001259	10219	7583-7623
CCR202	chr18:19781509-19781549[+]	GATA6	NM_005257	1441	723-763
CCR206	chr7:108213938-108213978[+]	DNAJB9	NM_012328	1497	141-181
CCR207	chr2:68406303-68406343[-]	PPP3R1	NM_000945	2106	1752-1792
CCR210	chr1:116947338-116947378[+]	ATP1A1	NM_000701	330	272-312
CCR211	chr1:68940922-68940962[-]	DEPDC1	NM_017779	2780	1653-1693
CCR213	chr4:146057366-146057406[-]	OTUD4	NM_001102653	3780	1176-1216
CCR218	chr1:234741770-234741810[-]	IRF2BP2	NM_182972	2868	1073-1113
CCR219	chr6:111215300-111215340[+]	AMD1	NM_001634	2094	481-521
CCR223	chr1:244219493-244219533[+]	ZNF238	NM_006352	2106	821-861
CCR232	chr3:182988873-182988913[+]	B3GNT5	NM_032047	2456	150-190
CCR236	chr6:28201208-28201248[+]	ZNF193	NM_006299	304	252-292
CCR237	chr1:193054840-193054880[+]	TROVE2	NM_004600	1254	979-1019
CCR239	chr11:118965393-118965433[-]	H2AFX	NM_002105	1088	240-280
CCR240	chr1:52553474-52553514[+]	BTF3L4	NM_152265	1660	1044-1084
CCR242	chr16:75690615-75690655[+]	TERF2IP	NM_018975	832	106-146
CCR245	chr12:69235383-69235423[+]	MDM2	NM_002392	5583	1754-1794
CCR247	chr5:139623097-139623137[+]	CYSTM1	NM_032412	378	101-141
CCR250	chr7:64169723-64169763[+]	ZNF107	NM_016220	2367	689-729
CCR253	chr15:101716298-101716338[-]	CHSY1	NM_014918	1665	1255-1295
CCR257	chr13:107195965-107196005[-]	ARGLU1	NM_018011	682	339-379
CCR259	chr1:7828659-7828699[+]	CAMTA1	NM_015215	3215	2108-2148
CCR260	chr3:194999992-195000032[-]	ACAP2	NM_012287	4592	25-65
CCR267	chr6:46128629-46128669[-]	ENPP5	NM_021572	1301	394-434
CCR270	chr5:134191224-134191264[+]	C5orf24	NM_152409	4268	67-107
CCR272	chr7:32907821-32907861[-]	KBTBD2	NM_015483	1179	1096-1136
CCR276	chr10:121334751-121334791[-]	TIAL1	NM_003252	2199	386-426
CCR279	chr4:77036103-77036143[-]	NUP54	NM_017426	702	376-416
CCR280	chr2:176984244-176984284[+]	HOXD10	NM_002148	711	285-325
CCR283	chr2:64686139-64686179[+]	LGALSL	NM_014181	2955	577-617
CCR289	chr13:49055069-49055109[+]	RB1	NM_000321	1819	862-902
CCR290	chr10:11504078-11504118[-]	USP6NL	NM_014688	1931	322-362
CCR296	chr17:8076534-8076574[-]	TMEM107	NM_032354	1224	947-987
CCR304	chr2:196601936-196601976[+]	SLC39A10	NM_020342	2661	2171-2211
CCR305	chr1:19401238-19401278[-]	UBR4	NM_020765	326	48-88
CCR306	chrX:135127744-135127784[+]	SLC9A6	NM_006359	2545	861-901
CCR317	chr5:89813168-89813208[-]	LYSMD3	NM_198273	3191	1428-1468
CCR323	chr2:44036959-44036999[+]	DYNC2LI1	NM_016008	243	53-93
CCR327	chr2:131906764-131906804[+]	PLEKHB2	NM_017958	3079	2418-2458
CCR330	chr2:12882049-12882089[+]	TRIB2	NM_021643	1938	1129-1169
CCR335	chr10:99080152-99080192[+]	FRAT1	NM_005479	1622	102-142
CCR338	chr2:20648654-20648694[+]	RHOB	NM_004040	1384	837-877
CCR339	chr1:41088137-41088177[-]	RIMS3	NM_014747	5837	4012-4052
CCR340	chr10:126086117-126086157[-]	OAT	NM_000274	639	354-394
CCR343	chr13:42897342-42897382[+]	AKAP11	NM_016248	4038	3978-4018
CCR345	chr1:113212783-113212823[+]	CAPZA1	NM_006135	1487	29-69
CCR347	chr11:118620522-118620562[-]	DDX6	NM_004397	4341	2252-2292
CCR353	chr19:57734078-57734118[+]	ZNF264	NM_003417	9865	9729-9769
CCR356	chr10:99217069-99217109[+]	ZDHHC16	NM_032327	479	421-461
CCR361	chr5:98191802-98191842[-]	CHD1	NM_001270	1176	242-282
CCR362	chr1:162493339-162493379[+]	UHMK1	NM_144624	7215	1135-1175
CCR362	chr1:162493339-162493379[+]	UHMK1	NM_175866	7079	999-1039
CCR363	chr4:151186559-151186599[-]	LRBA	NM_006726	1278	275-315
CCR364	chr18:9401432-9401472[+]	TWSG1	NM_020648	2893	1907-1947
CCR366	chr10:93273857-93273897[+]	HECTD2	NM_182765	2379	1716-1756
CCR368	chr1:78482860-78482900[+]	DNAJB4	NM_007034	1064	929-969
CCR369	chr8:104344567-104344607[+]	FZD6	NM_003506	1357	830-870
CCR372	chr3:47386253-47386293[+]	KLHL18	NM_025010	2875	822-862
CCR383	chr17:73060096-73060136[+]	KCTD2	NM_015353	2839	954-994
CCR388	chr3:98234353-98234393[-]	CLDND1	NM_019895	1186	1110-1150
CCR391	chr19:30192953-30192993[-]	C19orf12	NM_031448	3826	626-666
CCR397	chr1:114455953-114455993[+]	DCLRE1B	NM_022836	1895	1140-1180
CCR400	chr16:66756430-66756470[-]	DYNC1LI2	NM_006141	2826	1155-1195
CCR404	chr3:186507155-186507195[+]	EIF4A2	NM_001967	627	97-137
CCR405	chr13:41704147-41704187[-]	KBTBD6	NM_152903	2914	436-476
CCR410	chr15:96881918-96881958[+]	NR2F2	NM_021005	2641	1067-1107
CCR412	chr5:98130953-98130993[+]	RGMB	NM_001012761	2741	1496-1536
CCR414	chr15:60782401-60782441[-]	RORA	NM_002943	9171	7213-7253
CCR416	chr9:138903250-138903290[-]	NACC2	NM_144653	159	72-112
CCR417	chr5:77783312-77783352[-]	LHFPL2	NM_005779	3682	1368-1408
CCR420	chr5:56216350-56216390[-]	MIER3	NM_152622	3526	2565-2605
CCR423	chr5:133726723-133726763[+]	UBE2B	NM_003337	1755	679-719
CCR427	chr2:10924093-10924133[-]	PDIA6	NM_005742	867	251-291
CCR430	chr5:64019161-64019201[-]	SREK1IP1	NM_173829	6233	1010-1050
CCR431	chrX:133905121-133905161[-]	FAM122B	NM_001166600	1719	154-194
CCR431	chrX:133905121-133905161[-]	FAM122B	NM_145284	2573	1008-1048
CCR433	chr6:87971781-87971821[+]	ZNF292	NM_015021	1887	262-302
CCR435	chr2:201845468-201845508[-]	FAM126B	NM_173822	7552	485-525
CCR437	chr1:171562188-171562228[+]	PRRC2C	NM_015172	1664	1202-1242
CCR443	chrX:70832899-70832939[+]	ACRC	NM_052957	601	67-107
CCR450	chr6:11138673-11138713[+]	C6orf228	NM_001135575	4134	3838-3878
CCR452	chr12:68055729-68055769[+]	DYRK2	NM_003583	3951	3236-3276
CCR453	chr22:33255420-33255460[+]	TIMP3	NM_000362	3664	56-96
CCR457	chr14:99640256-99640296[-]	BCL11B	NM_022898	4863	192-232
CCR458	chr1:161135461-161135501[+]	USP21	NM_012475	279	224-264
CCR461	chr12:50493944-50493984[+]	SMARCD1	NM_003076	1711	1161-1201
CCR462	chr4:140432522-140432562[-]	SETD7	NM_030648	5625	255-295
CCR468	chr13:24879081-24879121[+]	SPATA13	NM_153023	4301	2170-2210
CCR469	chr16:31102510-31102550[-]	VKORC1	NM_206824	383	8-48
CCR473	chr5:139623261-139623301[+]	CYSTM1	NM_032412	378	265-305
CCR474	chr2:99935784-99935824[-]	TXNDC9	NM_005783	658	321-361
CCR475	chr1:234741504-234741544[-]	IRF2BP2	NM_182972	2868	1339-1379
CCR476	chr5:90665108-90665148[-]	ARRDC3	NM_020801	2676	2069-2109
CCR478	chr13:100615374-100615414[-]	ZIC5	NM_033132	2356	2217-2257
CCR480	chr18:19209941-19209981[+]	SNRPD1	NM_006938	1109	842-882
CCR481	chr8:131064691-131064731[-]	ASAP1	NM_018482	2624	2246-2286
CCR482	chr6:119230009-119230049[+]	ASF1A	NM_014034	1556	1230-1270
CCR483	chr19:38698724-38698764[+]	SIPA1L3	NM_015073	2128	1844-1884
CCR484	chr15:101812628-101812668[-]	VIMP	NM_018445	586	308-348
CCR485	chr1:2238841-2238881[+]	SKI	NM_003036	3448	637-677
CCR487	chr20:34257178-34257218[-]	NFS1	NM_021100	934	326-366
CCR493	chr15:51740543-51740583[-]	DMXL2	NM_015263	1260	598-638
CCR495	chrX:70794529-70794569[+]	OGT	NM_181672	2103	885-925
CCR496	chr5:110464775-110464815[+]	WDR36	NM_139281	3619	2194-2234
CCR498	chr9:2654116-2654156[+]	VLDLR	NM_003383	617	248-288
CCR499	chr11:19245874-19245914[-]	E2F8	NM_024680	595	291-331
CCR507	chr4:174252575-174252615[-]	HMGB2	NM_002129	704	616-656
CCR509	chr10:23729994-23730034[+]	OTUD1	NM_001145373	1478	162-202
CCR510	chr6:7251060-7251100[+]	RREB1	NM_001003698	3012	1859-1899
CCR511	chr5:139948605-139948645[+]	SLC35A4	NM_080670	954	876-916
CCR513	chr14:50363079-50363119[+]	ARF6	NM_001663	2790	2097-2137
CCR518	chr16:81064812-81064852[+]	CENPN	NM_001100624	2834	2556-2596
CCR523	chr17:47366668-47366708[-]	ZNF652	NM_014897	9207	9067-9107
CCR527	chr8:37717803-37717843[-]	RAB11FIP1	NM_025151	3948	2570-2610
CCR528	chr21:43159651-43159691[-]	RIPK4	NM_020639	1469	1307-1347
CCR530	chr1:226334216-226334256[-]	ACBD3	NM_022735	1931	55-95
CCR534	chr1:231489352-231489392[+]	SPRTN	NM_001010984	2637	2000-2040
CCR534	chr1:231489352-231489392[+]	SPRTN	NM_032018	882	245-285
CCR535	chr1:46093181-46093221[-]	GPBP1L1	NM_021639	952	707-747
CCR536	chr5:139496098-139496138[+]	PURA	NM_005859	1586	1363-1403
CCR538	chr19:12061232-12061272[+]	ZNF700	NM_144566	510	164-204
CCR540	chr10:89506284-89506324[+]	PAPSS2	NM_004670	1735	557-597
CCR541	chr6:139498624-139498664[+]	HECA	NM_016217	3704	382-422
CCR543	chr2:48605896-48605936[+]	FOXN2	NM_002158	3852	3314-3354
CCR544	chr15:63883094-63883134[+]	USP3	NM_006537	638	69-109
CCR551	chr9:34610620-34610660[-]	RPP25L	NM_148178	310	142-182
CCR552	chr17:7363998-7364038[-]	ZBTB4	NM_020899	2574	1221-1261
CCR554	chr10:101152073-101152113[+]	CNNM1	NM_020348	2814	800-840
CCR556	chr17:46199405-46199445[+]	SNX11	NM_013323	1235	535-575
CCR557	chr1:235274811-235274851[-]	TOMM20	NM_014765	2721	528-568
CCR559	chr6:52129254-52129294[-]	MCM3	NM_002388	574	92-132
CCR564	chr8:91637335-91637375[-]	TMEM64	NM_001008495	3676	524-564
CCR565	chr7:44918920-44918960[-]	PURB	NM_033224	8117	5049-5089
CCR573	chr1:155917639-155917679[-]	ARHGEF2	NM_004723	1103	54-94
CCR576	chr9:127642687-127642727[-]	GOLGA1	NM_002077	2236	82-122
CCR578	chr19:34960729-34960769[+]	UBA2	NM_005499	672	603-643
CCR580	chr13:21355368-21355408[-]	XPO4	NM_022459	6393	2453-2493
CCR584	chr17:79431273-79431313[+]	BAHCC1	NM_001080519	2515	430-470
CCR586	chr5:112355860-112355900[+]	DCP2	NM_152624	7486	6679-6719
CCR587	chr2:74441460-74441500[+]	MTHFD2	NM_006636	1055	91-131
CCR592	chr4:169847711-169847751[+]	PALLD	NM_001166109	2072	175-215
CCR592	chr4:169847711-169847751[+]	PALLD	NM_016081	2277	380-420
CCR593	chr22:32080560-32080600[-]	PRR14L	NM_173566	4179	913-953
CCR594	chr22:21803812-21803852[+]	HIC2	NM_015094	4718	2780-2820
CCR596	chr13:103492548-103492588[+]	BIVM	NM_017693	1673	333-373
CCR597	chr12:53910393-53910433[-]	ATF7	NM_006856	5078	488-528
CCR598	chr11:94906358-94906398[-]	SESN3	NM_144665	286	21-61
CCR599	chr8:6615087-6615127[+]	AGPAT5	NM_018361	4112	178-218
CCR602	chr11:57468597-57468637[+]	ZDHHC5	NM_015457	1156	1094-1134
CCR605	chrX:147030969-147031009[+]	FMR1	NM_001185075	2297	619-659
CCR605	chrX:147030969-147031009[+]	FMR1	NM_002024	2283	605-645
CCR608	chr4:139089071-139089111[-]	SLC7A11	NM_014331	7862	3999-4039
CCR611	chr11:89935020-89935060[-]	CHORDC1	NM_012124	1976	513-553
CCR613	chr3:156865829-156865869[-]	CCNL1	NM_020307	444	161-201
CCR615	chr21:34400986-34401026[+]	OLIG2	NM_005806	1358	844-884
CCR616	chr1:84702371-84702411[+]	PRKACB	NM_002731	3193	1383-1423
CCR617	chr6:110934499-110934539[-]	CDK19	NM_015076	4557	1199-1239
CCR619	chr16:69730925-69730965[+]	NFAT5	NM_006599	8299	671-711
CCR625	chr1:150548494-150548534[-]	MCL1	NM_021960	2824	1317-1357
CCR625	chr1:150548494-150548534[-]	MCL1	NM_182763	2813	1306-1346
CCR627	chr2:68406021-68406061[-]	PPP3R1	NM_000945	2106	2034-2074
CCR628	chr19:57766493-57766533[+]	ZNF805	NM_001023563	8035	422-462
CCR629	chr1:45975859-45975899[+]	MMACHC	NM_015506	1852	972-1012
CCR630	chr7:105731947-105731987[-]	SYPL1	NM_006754	1299	264-304
CCR631	chr19:55859346-55859386[+]	SUV420H2	NM_032701	672	529-569
CCR634	chr5:40831886-40831926[-]	RPL37	NM_000997	1176	680-720
CCR635	chrX:134185226-134185266[-]	FAM127B	NM_001078172	834	531-571
CCR635	chrX:134185226-134185266[-]	FAM127B	NM_001134321	376	73-113
CCR636	chr17:76793123-76793163[-]	USP36	NM_025090	1537	1339-1379
CCR637	chr11:92626125-92626165[+]	FAT3	NM_001008781	5356	1846-1886
CCR640	chr5:96498703-96498743[-]	RIOK2	NM_018343	2194	22-62
CCR641	chr3:24020007-24020047[+]	NR1D2	NM_005126	3199	1097-1137
CCR642	chr16:68261750-68261790[+]	NFATC3	NM_004555	2913	1501-1541
CCR642	chr16:68261750-68261790[+]	NFATC3	NM_173163	2907	1495-1535
CCR642	chr16:68261750-68261790[+]	NFATC3	NM_173165	2788	1376-1416
CCR644	chr14:29238182-29238222[+]	FOXG1	NM_005249	916	227-267
CCR651	chr7:42956846-42956886[-]	PSMA2	NM_002787	711	287-327
CCR652	chr22:36135039-36135079[-]	RBFOX2	NM_001031695	5469	5173-5213
CCR652	chr22:36135039-36135079[-]	RBFOX2	NM_014309	5459	5163-5203
CCR657	chr10:120442184-120442224[-]	CACUL1	NM_153810	5146	3416-3456
CCR658	chr22:50357152-50357192[+]	PIM3	NM_001001852	945	377-417
CCR661	chr1:213069233-213069273[+]	FLVCR1	NM_014053	1565	601-641
CCR662	chr12:69663704-69663744[+]	CPSF6	NM_007007	4850	416-456
CCR663	chr4:83274733-83274773[-]	HNRNPD	NM_002138	871	565-605
CCR667	chr11:9610437-9610477[+]	WEE1	NM_003390	1164	288-328
CCR668	chr4:122737996-122738036[-]	CCNA2	NM_001237	1194	757-797
CCR670	chr6:16302818-16302858[-]	ATXN1	NM_000332	7217	3702-3742
CCR673	chr3:133307865-133307905[+]	CDV3	NM_001134422	3100	1847-1887
CCR673	chr3:133307865-133307905[+]	CDV3	NM_017548	2228	975-1015
CCR675	chr6:11135032-11135072[+]	C6orf228	NM_001135575	4134	197-237
CCR676	chr6:83878867-83878907[-]	PGM3	NM_015599	325	46-86
CCR678	chr16:71681145-71681185[-]	PHLPP2	NM_015020	3941	1608-1648
CCR681	chr15:99503269-99503309[+]	IGF1R	NM_000875	7088	2598-2638
CCR682	chr2:175939077-175939117[-]	ATF2	NM_001880	331	220-260
CCR683	chr17:17714243-17714283[+]	RAI1	NM_030665	1470	948-988
CCR689	chr7:43678988-43679028[-]	COA1	NM_018224	322	153-193
CCR690	chr2:196601869-196601909[+]	SLC39A10	NM_020342	2661	2104-2144
CCR693	chr2:153505933-153505973[+]	FMNL2	NM_052905	1929	1514-1554
CCR695	chr1:156044123-156044163[-]	MEX3A	NM_001093725	4561	2202-2242
CCR696	chr4:57799020-57799060[+]	REST	NM_005612	3692	702-742
CCR699	chr7:27202757-27202797[-]	HOXA9	NM_152739	1165	425-465
CCR700	chr16:3776635-3776675[-]	CREBBP	NM_004380	2663	1044-1084
CCR704	chr20:5095816-5095856[-]	PCNA	NM_002592	330	73-113
CCR706	chr2:61413953-61413993[+]	AHSA2	NM_152392	765	32-72
CCR707	chr18:48702281-48702321[-]	MEX3C	NM_016626	1801	400-440
CCR713	chr17:73773499-73773539[-]	H3F3B	NM_005324	2161	1137-1177
CCR714	chr4:1205317-1205357[-]	CTBP1	NM_001328	800	671-711
CCR718	chr10:112773030-112773070[+]	SHOC2	NM_007373	1849	1454-1494
CCR719	chr5:87491195-87491235[-]	TMEM161B	NM_153354	1005	793-833
CCR722	chr22:38363746-38363786[+]	POLR2F	NM_021974	1597	24-64
CCR729	chr20:32264496-32264536[-]	E2F1	NM_005225	1246	2-42
CCR730	chr20:43383147-43383187[-]	RIMS4	NM_182970	4326	1588-1628
CCR732	chr3:182990255-182990295[+]	B3GNT5	NM_032047	2456	1532-1572
CCR733	chr5:65374974-65375014[+]	ERBB2IP	NM_018695	2492	616-656
CCR734	chr8:77778049-77778089[+]	ZFHX4	NM_024721	2720	1248-1288
CCR736	chr19:7087880-7087920[+]	ZNF557	NM_024341	4223	4125-4165
CCR738	chr3:179305852-179305892[+]	ACTL6A	NM_004301	395	54-94
CCR744	chr15:69561923-69561963[+]	GLCE	NM_015554	2961	340-380
CCR746	chr11:118473145-118473185[+]	ARCN1	NM_001655	2318	1716-1756
CCR749	chr1:42645070-42645110[-]	FOXJ3	NM_014947	3171	271-311
CCR750	chr11:111955065-111955105[+]	C11orf57	NM_018195	2178	1369-1409
CCR751	chr6:109689447-109689487[-]	CD164	NM_006016	2337	567-607
CCR752	chr18:13666428-13666468[-]	FAM210A	NM_152352	3133	11-51
CCR756	chr2:198416194-198416234[+]	MOB4	NM_015387	2145	824-864
CCR758	chr16:23077659-23077699[-]	USP31	NM_020718	6639	1668-1708
CCR759	chr13:49783453-49783493[+]	FNDC3A	NM_014923	2384	1922-1962
CCR761	chr8:119209399-119209439[-]	SAMD12	NM_001101676	8254	510-550
CCR762	chr7:77584522-77584562[+]	PHTF2	NM_020432	2626	327-367
CCR767	chr1:201938751-201938791[+]	TIMM17A	NM_006335	1107	69-109
CCR769	chr20:54945146-54945186[-]	AURKA	NM_003600	769	28-68
CCR777	chr9:95474433-95474473[-]	BICD2	NM_001003800	3791	2963-3003
CCR777	chr9:95474433-95474473[-]	BICD2	NM_015250	2093	1265-1305
CCR783	chr16:74655357-74655397[-]	RFWD3	NM_018124	2529	2429-2469
CCR785	chr1:244218736-244218776[+]	ZNF238	NM_006352	2106	64-104
CCR787	chr21:43409542-43409582[-]	ZNF295	NM_020727	4064	1422-1462
CCR789	chr7:25158691-25158731[-]	CYCS	NM_018947	5050	4589-4629
CCR791	chr21:30426545-30426585[+]	USP16	NM_006447	299	37-77
CCR792	chr5:40760889-40760929[-]	PRKAA1	NM_006251	3399	1951-1991
CCR795	chr3:33908657-33908697[+]	PDCD6IP	NM_013374	3178	640-680
CCR796	chr1:32373892-32373932[-]	PTP4A2	NM_080391	2431	521-561
CCR800	chr7:4805122-4805162[+]	FOXK1	NM_001037165	8979	3027-3067
CCR801	chr6:20490912-20490952[+]	E2F3	NM_001949	3284	251-291
CCR805	chr1:226548665-226548705[-]	PARP1	NM_001618	769	456-496
CCR806	chr1:161091668-161091708[-]	DEDD	NM_032998	1168	229-269
CCR807	chr3:100296041-100296081[+]	TMEM45A	NM_018004	423	179-219
CCR811	chr6:37142348-37142388[+]	PIM1	NM_002648	1337	481-521
CCR812	chr14:39501954-39501994[-]	SEC23A	NM_006364	1320	449-489
CCR813	chr7:27181284-27181324[-]	HOXA5	NM_019102	458	130-170
CCR814	chr16:23584951-23584991[+]	UBFD1	NM_019116	3799	3040-3080
CCR818	chr7:138992148-138992188[+]	UBN2	NM_173569	10400	9566-9606
CCR820	chr4:83847379-83847419[-]	LIN54	NM_194282	3499	1836-1876
CCR821	chr20:49507437-49507477[-]	ADNP	NM_015339	1059	465-505
CCR822	chr19:37211690-37211730[+]	ZNF567	NM_152603	655	120-160
CCR828	chr13:114295276-114295316[+]	TFDP1	NM_007111	1206	694-734
CCR832	chr16:74340125-74340165[+]	PSMD7	NM_002811	555	494-534
CCR834	chr12:19672247-19672287[+]	AEBP2	NM_001114176	3519	593-633
CCR834	chr12:19672247-19672287[+]	AEBP2	NM_153207	4122	1196-1236
CCR836	chr12:25358986-25359026[-]	KRAS	NM_004985	4549	3703-3743
CCR836	chr12:25358986-25359026[-]	KRAS	NM_033360	4670	3824-3864
CCR837	chr6:35542682-35542722[-]	FKBP5	NM_004117	2250	890-930
CCR839	chr21:34635995-34636035[+]	IFNAR2	NM_207585	1015	190-230
CCR841	chr8:442003-442043[-]	C8orf42	NM_175075	753	356-396
CCR842	chr16:69342802-69342842[+]	SNTB2	NM_006750	8128	7975-8015
CCR852	chr2:204296709-204296749[+]	ABI2	NM_005759	4817	4634-4674
CCR859	chr1:10521595-10521635[-]	DFFA	NM_213566	2488	1456-1496
CCR860	chr9:90346177-90346217[+]	CTSL1	NM_001912	362	155-195
CCR864	chr10:93789864-93789904[+]	BTAF1	NM_003972	1390	1174-1214
CCR869	chr7:127221883-127221923[-]	GCC1	NM_024523	1386	145-185
CCR874	chr5:64020026-64020066[-]	SREK1IP1	NM_173829	6233	145-185
CCR875	chr15:70341203-70341243[-]	TLE3	NM_005078	1893	1193-1233
CCR878	chr9:72327758-72327798[-]	PTAR1	NM_001099666	8820	5460-5500
CCR879	chr17:76988696-76988736[-]	CANT1	NM_138793	1834	896-936
CCR881	chr12:27953376-27953416[+]	KLHDC5	NM_020782	4874	2277-2317
CCR883	chr15:77405859-77405899[-]	PEAK1	NM_024776	6027	599-639
CCR888	chr10:62553947-62553987[+]	CDK1	NM_001786	877	214-254
CCR892	chr10:116623166-116623206[+]	FAM160B1	NM_020940	3175	1867-1907
CCR898	chr1:59247177-59247217[-]	JUN	NM_002228	1284	530-570
CCR899	chr3:98516342-98516382[-]	DCBLD2	NM_080927	3402	1834-1874
CCR905	chr4:175158327-175158367[-]	FBXO8	NM_012180	753	196-236
CCR910	chr5:153433472-153433512[+]	MFAP3	NM_005927	3741	199-239
CCR916	chr12:69969924-69969964[+]	FRS2	NM_006654	4827	1189-1229
CCR917	chr3:48199872-48199912[-]	CDC25A	NM_001789	1767	523-563
CCR919	chr18:47008464-47008504[-]	C18orf32	NM_001035005	685	211-251
CCR922	chr10:98721619-98721659[+]	LCOR	NM_001170766	6023	3444-3484
CCR922	chr10:98721619-98721659[+]	LCOR	NM_032440	8519	5940-5980
CCR924	chr17:56567997-56568037[-]	MTMR4	NM_004687	2131	987-1027
CCR928	chr14:67648046-67648086[+]	GPHN	NM_020806	871	392-432
CCR929	chr19:3630713-3630753[-]	PIP5K1C	NM_012398	2986	2412-2452
CCR930	chr2:200134264-200134304[-]	SATB2	NM_015265	2711	2630-2670
CCR931	chr5:137274406-137274446[-]	FAM13B	NM_016603	2272	1468-1508
CCR932	chrX:53405970-53406010[-]	SMC1A	NM_006306	5954	1014-1054
CCR937	chr1:234742747-234742787[-]	IRF2BP2	NM_182972	2868	96-136
CCR939	chr10:300180-300220[+]	ZMYND11	NM_006624	2167	1770-1810
CCR940	chr20:61576821-61576861[+]	C20orf11	NM_017896	3563	557-597
CCR941	chr4:76568155-76568195[-]	G3BP2	NM_012297	2661	2419-2459
CCR942	chr8:116424710-116424750[-]	TRPS1	NM_014112	5527	1501-1541
CCR944	chr18:9956353-9956393[+]	VAPA	NM_003574	5810	2145-2185
CCR947	chr1:179074180-179074220[-]	ABL2	NM_005158	8391	2633-2673
CCR951	chr2:25166597-25166637[-]	DNAJC27	NM_001198559	4107	3975-4015
CCR951	chr2:25166597-25166637[-]	DNAJC27	NM_016544	3980	3848-3888
CCR953	chr1:40706385-40706425[+]	RLF	NM_012421	474	266-306
CCR957	chrX:62568558-62568598[-]	SPIN4	NM_001012968	2842	1351-1391
CCR961	chr18:46446241-46446281[-]	SMAD7	NM_005904	1519	1461-1501
CCR966	chr14:29238099-29238139[+]	FOXG1	NM_005249	916	144-184
CCR970	chrX:48750963-48751003[-]	TIMM17B	NM_005834	282	9-49
CCR972	chr1:6283670-6283710[-]	ICMT	NM_012405	3887	1430-1470
CCR973	chr5:31553278-31553318[+]	C5orf22	NM_018356	2156	269-309
CCR974	chr2:70377445-70377485[-]	C2orf42	NM_017880	471	3-43
CCR976	chr2:38294831-38294871[-]	CYP1B1	NM_000104	3119	2994-3034
CCR982	chr18:5290551-5290591[-]	ZFP161	NM_003409	1839	266-306
CCR983	chr15:44818856-44818896[+]	CTDSPL2	NM_016396	3057	2484-2524
CCR984	chr2:74441436-74441476[+]	MTHFD2	NM_006636	1055	67-107
CCR986	chr6:8015513-8015553[-]	MUTED	NM_201280	1667	329-369
CCR990	chr5:127594009-127594049[-]	FBN2	NM_001999	1546	1098-1138
CCR992	chr20:57608819-57608859[-]	SLMO2	NM_016045	1862	1203-1243
CCR1007	chr16:71885862-71885902[+]	ATXN1L	NM_001137675	5518	149-189
CCR1008	chr14:56766848-56766888[+]	PELI2	NM_021255	4147	2964-3004
CCR1009	chr1:35649864-35649904[-]	SFPQ	NM_005066	856	153-193
CCR1011	chr15:66181473-66181513[+]	RAB11A	NM_004663	1614	1295-1335
CCR1012	chr5:134195280-134195320[+]	C5orf24	NM_152409	4268	4123-4163
CCR1014	chr7:107401470-107401510[+]	CBLL1	NM_024814	2460	1847-1887
CCR1015	chr15:73852376-73852416[-]	NPTN	NM_012428	1060	988-1028
CCR1017	chr5:151183681-151183721[+]	G3BP1	NM_005754	1263	29-69
CCR1020	chr10:11502842-11502882[-]	USP6NL	NM_014688	1931	1558-1598
CCR1022	chr4:160280591-160280631[+]	RAPGEF2	NM_014247	2010	1300-1340
CCR1025	chr1:145442531-145442571[+]	TXNIP	NM_006472	1410	1313-1353
CCR1027	chr12:112466226-112466266[-]	NAA25	NM_024953	2842	1069-1109
CCR1028	chr7:137565096-137565136[-]	CREB3L2	NM_194071	5497	86-126
CCR1031	chr9:133512917-133512957[+]	FUBP3	NM_003934	1330	508-548
CCR1032	chr17:37330992-37331032[-]	CACNB1	NM_000723	1737	414-454
CCR1034	chr2:176960508-176960548[+]	HOXD13	NM_000523	1208	1050-1090
CCR1037	chr18:66343704-66343744[-]	TMX3	NM_019022	3245	426-466
CCR1040	chr21:34107216-34107256[-]	GCFC1	NM_016631	1051	5-45
CCR1041	chr9:112003186-112003226[-]	EPB41L4B	NM_018424	1930	716-756
CCR1042	chr5:122682028-122682068[-]	CEP120	NM_153223	1634	145-185
CCR1043	chr2:26358233-26358273[+]	RAB10	NM_016131	2433	343-383
CCR1045	chr6:111620548-111620588[-]	REV3L	NM_002912	985	631-671
CCR1051	chr10:89313002-89313042[+]	MINPP1	NM_001178117	1276	1060-1100
CCR1051	chr10:89313002-89313042[+]	MINPP1	NM_004897	983	767-807
CCR1052	chr3:183397141-183397181[+]	KLHL24	NM_017644	5230	67-107
CCR1053	chr17:36922991-36923031[-]	PIP4K2B	NM_003559	4000	2913-2953
CCR1057	chr11:46698649-46698689[-]	ARHGAP1	NM_004308	1955	1898-1938
CCR1064	chr12:4668787-4668827[+]	RAD51AP1	NM_006479	1054	628-668
CCR1067	chr2:113288416-113288456[+]	TTL	NM_153712	3850	2044-2084
CCR1070	chr12:56598461-56598501[-]	RNF41	NM_005785	1945	1730-1770
CCR1071	chr19:56207087-56207127[+]	EPN1	NM_013333	411	365-405
CCR1075	chr1:95363124-95363164[-]	CNN3	NM_001839	791	134-174
CCR1078	chr14:50089744-50089784[+]	MGAT2	NM_002408	869	414-454
CCR1079	chr11:32999176-32999216[+]	QSER1	NM_001076786	3794	1156-1196
CCR1080	chr10:126674718-126674758[+]	ZRANB1	NM_017580	2444	1157-1197
CCR1081	chr2:121052236-121052276[+]	RALB	NM_002881	1450	1400-1440
CCR1091	chr14:34903578-34903618[-]	SPTSSA	NM_138288	2263	789-829
CCR1098	chr1:28218197-28218237[-]	RPA2	NM_002946	625	437-477
CCR1101	chr4:2232917-2232957[-]	HAUS3	NM_024511	3558	697-737
CCR1112	chr10:65380917-65380957[+]	REEP3	NM_001001330	4254	288-328
CCR1116	chr14:99639556-99639596[-]	BCL11B	NM_022898	4863	892-932
CCR1125	chr1:224577281-224577321[-]	WDR26	NM_025160	4692	216-256
CCR1129	chr17:61667079-61667119[+]	DCAF7	NM_005828	5108	545-585
CCR1133	chr1:31404574-31404614[-]	PUM1	NM_014676	1705	1444-1484
CCR1137	chr1:145442153-145442193[+]	TXNIP	NM_006472	1410	935-975
CCR1141	chr8:81888667-81888707[-]	PAG1	NM_018440	8733	72-112
CCR1142	chr1:211919366-211919406[-]	LPGAT1	NM_014873	6442	3835-3875
CCR1143	chr1:165632115-165632155[-]	ALDH9A1	NM_000696	838	132-172
CCR1145	chr1:109242973-109243013[+]	PRPF38B	NM_018061	1780	331-371
CCR1148	chr15:77241941-77241981[+]	RCN2	NM_002902	1038	378-418
CCR1149	chr10:75881715-75881755[-]	AP3M1	NM_012095	3553	1813-1853
CCR1150	chr9:139297131-139297171[-]	SDCCAG3	NM_006643	866	69-109
CCR1151	chr5:173386512-173386552[+]	CPEB4	NM_030627	4173	3372-3412
CCR1153	chr1:45233306-45233346[+]	KIF2C	NM_006845	587	455-495
CCR1160	chr6:21597232-21597272[+]	SOX4	NM_003107	2659	1042-1082
CCR1161	chr1:146627959-146627999[-]	PRKAB2	NM_005399	4459	3145-3185
CCR1164	chr16:50069482-50069522[+]	CNEP1R1	NM_153261	1630	113-153
CCR1166	chrX:154005245-154005285[+]	DKC1	NM_001363	822	103-143
CCR1167	chr1:173769509-173769549[-]	CENPL	NM_033319	898	37-77
CCR1179	chr5:150868185-150868225[+]	SLC36A1	NM_078483	4125	370-410
CCR1182	chr18:55150270-55150310[+]	ONECUT2	NM_004852	14575	6315-6355
CCR1184	chr19:34306534-34306574[+]	KCTD15	NM_001129994	2813	2681-2721
CCR1184	chr19:34306534-34306574[+]	KCTD15	NM_024076	3959	3827-3867
CCR1185	chr6:166733605-166733645[-]	SFT2D1	NM_145169	188	60-100
CCR1186	chr11:43364096-43364136[+]	API5	NM_001142930	2020	36-76
CCR1186	chr11:43364096-43364136[+]	API5	NM_006595	2075	91-131
CCR1187	chr1:203277121-203277161[+]	BTG2	NM_006763	2163	555-595
CCR1190	chr17:40176292-40176332[+]	NKIRAS2	NM_001144929	1930	566-606
CCR1190	chr17:40176292-40176332[+]	NKIRAS2	NM_017595	1745	381-421
CCR1191	chr1:231469667-231469707[-]	EXOC8	NM_175876	2832	1607-1647
CCR1196	chr17:647821-647861[-]	GEMIN4	NM_015721	445	245-285
CCR1198	chr17:27232799-27232839[-]	PHF12	NM_001033561	930	362-402
CCR1200	chr10:98718194-98718234[+]	LCOR	NM_001170766	6023	19-59
CCR1200	chr10:98718194-98718234[+]	LCOR	NM_032440	8519	2515-2555
CCR1203	chr20:43708334-43708374[+]	STK4	NM_006282	4776	4517-4557
CCR1209	chr5:153435738-153435778[+]	MFAP3	NM_005927	3741	2465-2505
CCR1210	chr1:160328633-160328673[+]	NCSTN	NM_015331	681	572-612
CCR1211	chr19:1257530-1257570[+]	MIDN	NM_177401	1871	259-299
CCR1212	chr16:46836060-46836100[-]	C16orf87	NM_001001436	905	764-804
CCR1215	chr21:45402637-45402677[+]	AGPAT3	NM_020132	5202	364-404
CCR1216	chr1:47143735-47143775[-]	KIAA0494	NM_014774	3302	358-398
CCR1217	chr6:7287828-7287868[-]	SSR1	NM_003144	8809	2229-2269
CCR1221	chr1:227174988-227175028[+]	ADCK3	NM_020247	808	550-590
CCR1222	chr20:60710189-60710229[+]	LSM14B	NM_144703	1230	985-1025
CCR1223	chr10:30301829-30301869[-]	KIAA1462	NM_020848	5083	4943-4983
CCR1224	chr5:61682021-61682061[+]	KIF2A	NM_004520	814	625-665
CCR1227	chr1:113244010-113244050[-]	RHOC	NM_175744	413	112-152
CCR1231	chr10:28971559-28971599[+]	BAMBI	NM_012342	538	229-269
CCR1234	chr1:244219825-244219865[+]	ZNF238	NM_006352	2106	1153-1193
CCR1235	chr8:144734515-144734555[+]	ZNF623	NM_014789	2247	862-902
CCR1236	chr7:66452822-66452862[-]	SBDS	NM_016038	668	496-536
CCR1239	chr3:9427585-9427625[+]	THUMPD3	NM_015453	2103	1213-1253
CCR1240	chr2:24222784-24222824[+]	UBXN2A	NM_181713	956	47-87
CCR1244	chr8:94744510-94744550[-]	RBM12B	NM_203390	1902	1083-1123
CCR1246	chr20:61510238-61510278[-]	DIDO1	NM_033081	1495	307-347
CCR1248	chr5:82352009-82352049[-]	TMEM167A	NM_174909	4238	854-894
CCR1250	chr11:85372834-85372874[-]	CREBZF	NM_001039618	6247	1981-2021
CCR1253	chr19:1435285-1435325[+]	DAZAP1	NM_018959	771	374-414
CCR1253	chr19:1435285-1435325[+]	DAZAP1	NM_170711	947	550-590
CCR1254	chr6:52866482-52866522[-]	ICK	NM_014920	3849	3425-3465
CCR1256	chr9:33113300-33113340[-]	B4GALT1	NM_001497	2813	112-152
CCR1260	chr12:1604876-1604916[+]	ERC1	NM_178039	5703	5480-5520
CCR1264	chr2:152658968-152659008[-]	ARL5A	NM_012097	2310	782-822
CCR1265	chr14:54944209-54944249[-]	GMFB	NM_004124	3597	557-597
CCR1268	chr17:26521723-26521763[+]	NLK	NM_016231	1742	61-101
CCR1271	chr14:105476594-105476634[-]	CDCA4	NM_017955	1631	907-947
CCR1271	chr14:105476594-105476634[-]	CDCA4	NM_145701	1105	381-421
CCR1272	chr8:74706012-74706052[-]	UBE2W	NM_018299	3497	285-325
CCR1279	chr10:124190542-124190582[+]	PLEKHA1	NM_001195608	2772	1443-1483
CCR1279	chr10:124190542-124190582[+]	PLEKHA1	NM_021622	2417	1088-1128
CCR1281	chr1:2335108-2335148[+]	RER1	NM_007033	2322	545-585
CCR1282	chr2:23929900-23929940[+]	KLHL29	NM_052920	1949	366-406
CCR1285	chr19:33873435-33873475[+]	CEBPG	NM_001806	2994	2837-2877
CCR1290	chr1:93308652-93308692[-]	FAM69A	NM_001006605	1219	248-288
CCR1291	chr4:77969186-77969226[-]	CCNI	NM_006835	195	146-186
CCR1292	chr1:32661397-32661437[+]	TXLNA	NM_175852	3090	601-641
CCR1295	chr15:45900168-45900208[+]	PLDN	NM_012388	3197	1456-1496
CCR1296	chr6:111215066-111215106[+]	AMD1	NM_001634	2094	247-287
CCR1298	chr6:20491401-20491441[+]	E2F3	NM_001949	3284	740-780
CCR1300	chrX:8497154-8497194[-]	KAL1	NM_000216	4121	3842-3882
CCR1304	chr2:74753788-74753828[-]	AUP1	NM_181575	152	99-139
CCR1306	chr19:1257589-1257629[+]	MIDN	NM_177401	1871	318-358
CCR1307	chr10:32298644-32298684[-]	KIF5B	NM_004521	2527	1781-1821
CCR1314	chr17:40176366-40176406[+]	NKIRAS2	NM_001144929	1930	640-680
CCR1314	chr17:40176366-40176406[+]	NKIRAS2	NM_017595	1745	455-495
CCR1321	chr14:75369472-75369512[+]	DLST	NM_001933	1417	439-479
CCR1322	chr12:4409773-4409813[+]	CCND2	NM_001759	5347	598-638
CCR1324	chr21:33043647-33043687[-]	SCAF4	NM_020706	399	25-65
CCR1331	chr20:62906935-62906975[+]	PCMTD2	NM_018257	2626	1982-2022
CCR1332	chr13:48835782-48835822[+]	ITM2B	NM_021999	872	422-462
CCR1338	chr15:55904035-55904075[-]	PRTG	NM_173814	8471	8135-8175
CCR1339	chr15:78792759-78792799[+]	IREB2	NM_004136	3313	2274-2314
CCR1340	chr7:25161679-25161719[-]	CYCS	NM_018947	5050	1601-1641
CCR1353	chr16:24837116-24837156[+]	TNRC6A	NM_014494	2419	1988-2028
CCR1355	chr6:111215396-111215436[+]	AMD1	NM_001634	2094	577-617
CCR1357	chr7:66422257-66422297[+]	TMEM248	NM_017994	3029	1748-1788
CCR1360	chr12:30862629-30862669[-]	CAPRIN2	NM_023925	350	167-207
CCR1362	chr22:40731430-40731470[+]	TNRC6B	NM_015088	12567	12185-12225
CCR1365	chr14:57673388-57673428[-]	EXOC5	NM_006544	6133	1899-1939
CCR1366	chr8:57074218-57074258[-]	PLAG1	NM_002655	5334	4544-4584
CCR1367	chr1:36199911-36199951[-]	CLSPN	NM_022111	4384	2146-2186
CCR1368	chrX:134167494-134167534[+]	FAM127A	NM_001078171	820	739-779
CCR1373	chr6:24705107-24705147[-]	C6orf62	NM_030939	1275	1218-1258
CCR1374	chr8:94744073-94744113[-]	RBM12B	NM_203390	1902	1520-1560
CCR1376	chr1:38174130-38174170[+]	CDCA8	NM_018101	1353	92-132
CCR1381	chr14:93707131-93707171[-]	BTBD7	NM_001002860	4723	1448-1488
CCR1387	chrX:84527599-84527639[+]	ZNF711	NM_021998	1534	765-805
CCR1391	chr2:27875947-27875987[-]	SUPT7L	NM_014860	2673	365-405
CCR1392	chr1:42644527-42644567[-]	FOXJ3	NM_014947	3171	814-854
CCR1394	chr5:98191172-98191212[-]	CHD1	NM_001270	1176	872-912
CCR1396	chr4:129795193-129795233[+]	PHF17	NM_199320	2962	1776-1816
CCR1397	chr4:122737947-122737987[-]	CCNA2	NM_001237	1194	806-846
CCR1398	chr5:135518381-135518421[+]	SMAD5	NM_005903	5254	5213-5253
CCR1405	chr2:18736767-18736807[-]	NT5C1B-RDH14	NM_001199104	1061	243-283
CCR1408	chr7:87460539-87460579[+]	RUNDC3B	NM_138290	2268	1194-1234
CCR1410	chr9:33038956-33038996[+]	DNAJA1	NM_001539	161	55-95
CCR1411	chr2:191556235-191556275[+]	NAB1	NM_005966	2433	1176-1216
CCR1417	chr2:219317071-219317111[-]	USP37	NM_020935	4679	2542-2582
CCR1419	chr7:120428299-120428339[-]	TSPAN12	NM_012338	1272	307-347
CCR1421	chr1:212910081-212910121[-]	NSL1	NM_001042549	12544	1918-1958
CCR1421	chr1:212910081-212910121[-]	NSL1	NM_015471	12255	1629-1669
CCR1422	chr14:34903273-34903313[-]	SPTSSA	NM_138288	2263	1094-1134
CCR1425	chr19:7116966-7117006[-]	INSR	NM_000208	4801	61-101
CCR1428	chr20:2129128-2129168[+]	STK35	NM_080836	4806	4736-4776
CCR1430	chr11:1297976-1298016[-]	TOLLIP	NM_019009	2671	253-293
CCR1431	chr16:87364777-87364817[-]	FBXO31	NM_024735	1952	77-117
CCR1440	chr6:138412611-138412651[-]	PERP	NM_022121	3537	528-568
CCR1442	chrX:39910780-39910820[-]	BCOR	NM_017745	863	542-582
CCR1445	chr17:39981450-39981490[-]	NT5C3L	NM_052935	441	285-325
CCR1451	chr6:37142731-37142771[+]	PIM1	NM_002648	1337	864-904
CCR1453	chr5:177022771-177022811[+]	TMED9	NM_017510	682	354-394
CCR1454	chr12:12619437-12619477[+]	LOH12CR1	NM_058169	1128	727-767
CCR1459	chr17:68173071-68173111[+]	KCNJ2	NM_000891	3719	607-647
CCR1467	chr9:127910520-127910560[-]	PPP6C	NM_002721	3100	1392-1432
CCR1470	chrX:24229554-24229594[+]	ZFX	NM_001178095	6057	1239-1279
CCR1470	chrX:24229554-24229594[+]	ZFX	NM_003410	4879	61-101
CCR1472	chr4:69179571-69179611[-]	YTHDC1	NM_133370	3712	206-246
CCR1474	chr3:134074865-134074905[-]	AMOTL2	NM_016201	2357	1642-1682
CCR1481	chr21:28209344-28209384[-]	ADAMTS1	NM_006988	1292	514-554
CCR1482	chr3:99897400-99897440[+]	C3orf26	NM_032359	244	168-208
CCR1483	chr1:93603637-93603677[+]	MTF2	NM_007358	2054	1053-1093
CCR1484	chr12:133345507-133345547[-]	GOLGA3	NM_005895	4196	4144-4184
CCR1485	chr1:53712435-53712475[-]	LRP8	NM_004631	1473	215-255
CCR1485	chr1:53712435-53712475[-]	LRP8	NM_033300	1478	215-255
CCR1486	chr17:27232658-27232698[-]	PHF12	NM_001033561	930	503-543
CCR1487	chr2:227862507-227862547[+]	RHBDD1	NM_032276	3685	2269-2309
CCR1489	chr11:33375252-33375292[+]	HIPK3	NM_005734	825	138-178
CCR1490	chr2:235401700-235401740[-]	ARL4C	NM_005737	2966	2912-2952
CCR1494	chr14:95555416-95555456[-]	DICER1	NM_001195573	4386	1495-1535
CCR1494	chr14:95555416-95555456[-]	DICER1	NM_030621	4270	1379-1419
CCR1496	chr9:132400495-132400535[-]	ASB6	NM_177999	3749	97-137
CCR1500	chr17:74731129-74731169[-]	SRSF2	NM_001195427	1049	79-119
CCR1500	chr17:74731129-74731169[-]	SRSF2	NM_003016	2044	1074-1114
CCR1503	chr8:80950296-80950336[-]	TPD52	NM_005079	3246	15-55
CCR1506	chr21:34949754-34949794[+]	SON	NM_138927	1082	1024-1064
CCR1509	chr12:42553934-42553974[-]	YAF2	NM_005748	3484	417-457
CCR1510	chr6:93951037-93951077[-]	EPHA7	NM_004440	3404	2067-2107
CCR1511	chr2:55200030-55200070[-]	RTN4	NM_007008	965	222-262
CCR1513	chr9:108152668-108152708[+]	SLC44A1	NM_080546	2345	1331-1371
CCR1518	chr2:172414532-172414572[+]	CYBRD1	NM_001127383	3484	3373-3413
CCR1518	chr2:172414532-172414572[+]	CYBRD1	NM_024843	3306	3195-3235
CCR1519	chr17:28852084-28852124[+]	GOSR1	NM_004871	4436	2688-2728
CCR1522	chr7:26412832-26412872[+]	SNX10	NM_013322	1757	640-680
CCR1523	chr1:52552558-52552598[+]	BTF3L4	NM_152265	1660	128-168
CCR1528	chr11:10818636-10818676[-]	EIF4G2	NM_001418	770	687-727
CCR1532	chr7:115898789-115898829[+]	TES	NM_015641	1301	1253-1293
CCR1534	chr9:22004594-22004634[-]	CDKN2B	NM_004936	3084	1352-1392
CCR1534	chr9:22004594-22004634[-]	CDKN2B	NM_078487	3387	1655-1695
CCR1537	chr20:49369191-49369231[+]	PARD6B	NM_032521	3253	2166-2206
CCR1543	chr21:27252938-27252978[-]	APP	NM_000484	1120	1003-1043
CCR1544	chr6:159187430-159187470[-]	EZR	NM_003379	1173	476-516
CCR1546	chr6:97246134-97246174[-]	GPR63	NM_030784	460	174-214
CCR1547	chr6:18225722-18225762[-]	DEK	NM_003472	1550	188-228
CCR1548	chr3:183901817-183901857[+]	AP2M1	NM_004068	475	413-453
CCR1550	chr9:23691107-23691147[-]	ELAVL2	NM_004432	2452	1408-1448
CCR1551	chr6:47200147-47200187[-]	TNFRSF21	NM_014452	1233	314-354
CCR1553	chr19:57804716-57804756[+]	ZNF460	NM_006635	1838	1118-1158
CCR1558	chr11:58385891-58385931[+]	ZFP91	NM_053023	3844	712-752
CCR1562	chr2:75885963-75886003[+]	MRPL19	NM_014763	6923	3552-3592
CCR1563	chr21:34003242-34003282[-]	SYNJ1	NM_003895	2236	23-63
CCR1563	chr21:34003242-34003282[-]	SYNJ1	NM_203446	3046	833-873
CCR1565	chr7:27146661-27146701[-]	HOXA3	NM_030661	1725	833-873
CCR1568	chr14:39867018-39867058[-]	FBXO33	NM_203301	3143	1662-1702
CCR1572	chr20:33128447-33128487[+]	DYNLRB1	NM_014183	334	19-59
CCR1588	chr3:67059723-67059763[+]	KBTBD8	NM_032505	2823	914-954
CCR1590	chr6:8080051-8080091[-]	EEF1E1	NM_004280	495	32-72
CCR1594	chr6:36571837-36571877[+]	SRSF3	NM_003017	2478	2071-2111
CCR1606	chr7:6442593-6442633[+]	RAC1	NM_006908	1521	516-556
CCR1612	chr15:40328054-40328094[-]	SRP14	NM_003134	643	440-480
CCR1618	chr12:26273513-26273553[-]	BHLHE41	NM_030762	2040	1446-1486
CCR1621	chr5:98130329-98130369[+]	RGMB	NM_001012761	2741	872-912
CCR1627	chr17:18231303-18231343[+]	SMCR8	NM_144775	4986	4919-4959
CCR1628	chr10:98744920-98744960[+]	C10orf12	NM_015652	694	29-69
CCR1629	chr22:39886719-39886759[+]	MGAT3	NM_002409	3245	1765-1805
CCR1636	chr3:170610791-170610831[-]	EIF5A2	NM_020390	4945	318-358
CCR1637	chr13:108883473-108883513[+]	ABHD13	NM_032859	4023	893-933
CCR1638	chr16:81413392-81413432[+]	GAN	NM_022041	2602	2191-2231
CCR1639	chr1:38489942-38489982[+]	UTP11L	NM_016037	1197	642-682
CCR1641	chr18:43843381-43843421[+]	C18orf25	NM_145055	3874	300-340
CCR1643	chr17:74731267-74731307[-]	SRSF2	NM_003016	2044	936-976
CCR1645	chr17:53797331-53797371[-]	TMEM100	NM_018286	1039	656-696
CCR1650	chr1:225590900-225590940[-]	LBR	NM_002296	1801	65-105
CCR1654	chr9:95377357-95377397[-]	IPPK	NM_022755	2648	717-757
CCR1656	chr5:58268758-58268798[-]	PDE4D	NM_006203	5625	1693-1733
CCR1657	chr14:74666235-74666275[+]	LIN52	NM_001024674	1437	555-595
CCR1665	chr17:45197710-45197750[-]	CDC27	NM_001256	2990	551-591
CCR1674	chrX:13792134-13792174[-]	GPM6B	NM_005278	570	489-529
CCR1677	chr13:115092680-115092720[+]	CHAMP1	NM_032436	1047	924-964
CCR1678	chr15:32930558-32930598[+]	ARHGAP11A	NM_014783	1822	512-552
CCR1689	chr2:204298934-204298974[-]	RAPH1	NM_213589	5621	5186-5226
CCR1694	chr5:176734214-176734254[-]	MXD3	NM_031300	383	335-375
CCR1697	chr19:15533057-15533097[-]	WIZ	NM_021241	1569	790-830
CCR1700	chr6:31498085-31498125[-]	DDX39B	NM_004640	215	86-126
CCR1701	chr8:79514807-79514847[+]	PKIA	NM_006823	1429	751-791
CCR1714	chr4:110745612-110745652[+]	GAR1	NM_018983	306	25-65
CCR1715	chr17:27870054-27870094[+]	TAOK1	NM_020791	1462	14-54
CCR1716	chr9:74969431-74969471[-]	ZFAND5	NM_006007	4528	1398-1438
CCR1721	chr11:67924275-67924315[-]	SUV420H1	NM_017635	1648	840-880
CCR1722	chr22:36906930-36906970[-]	EIF3D	NM_003753	137	64-104
CCR1724	chr6:47199872-47199912[-]	TNFRSF21	NM_014452	1233	589-629
CCR1726	chr13:110407110-110407150[-]	IRS2	NM_003749	2467	1501-1541
CCR1730	chr5:176492945-176492985[+]	ZNF346	NM_012279	2145	1345-1385
CCR1732	chr1:211918707-211918747[-]	LPGAT1	NM_014873	6442	4494-4534
CCR1733	chr20:55983191-55983231[+]	RBM38	NM_017495	1484	289-329
CCR1733	chr20:55983191-55983231[+]	RBM38	NM_183425	1783	588-628
CCR1734	chr6:12164784-12164824[+]	HIVEP1	NM_002114	538	90-130
CCR1736	chr1:223963484-223963524[+]	CAPN2	NM_001748	1161	925-965
CCR1750	chr9:134375177-134375217[+]	PRRC2B	NM_013318	4314	3916-3956
CCR1752	chr17:30697302-30697342[+]	ZNF207	NM_003457	690	524-564
CCR1753	chr2:10271299-10271339[+]	RRM2	NM_001034	2033	1786-1826
CCR1762	chr7:139246895-139246935[-]	HIPK2	NM_022740	11357	10738-10778
CCR1765	chr19:10426908-10426948[-]	RAVER1	NM_133452	1241	1182-1222
CCR1766	chr7:116200667-116200707[+]	CAV1	NM_001753	1898	1326-1366
CCR1768	chr16:81009737-81009777[-]	CMC2	NM_020188	291	213-253
CCR1769	chr22:35689874-35689914[+]	HMGXB4	NM_001003681	2156	230-270
CCR1772	chr4:1694788-1694828[-]	SLBP	NM_006527	797	496-536
CCR1774	chr19:19010328-19010368[-]	COPE	NM_007263	165	120-160
CCR1775	chr1:200828609-200828649[+]	CAMSAP2	NM_203459	2644	1422-1462
CCR1776	chr12:57620132-57620172[+]	NXPH4	NM_007224	702	602-642
CCR1778	chr7:106842709-106842749[+]	HBP1	NM_012257	1098	833-873
CCR1779	chr4:85571060-85571100[+]	CDS1	NM_001263	2654	1221-1261
CCR1781	chr19:44417497-44417537[-]	ZNF45	NM_003425	763	2-42
CCR1788	chr5:138666075-138666115[+]	MATR3	NM_018834	2282	991-1031
CCR1789	chr19:2037494-2037534[-]	MKNK2	NM_017572	268	204-244
CCR1789	chr19:2037494-2037534[-]	MKNK2	NM_199054	2142	2078-2118
CCR1792	chr3:142775819-142775859[+]	U2SURP	NM_001080415	4275	527-567
CCR1793	chr15:38645394-38645434[+]	SPRED1	NM_152594	5585	1529-1569
CCR1794	chr7:94294571-94294611[+]	PEG10	NM_001040152	5160	725-765
CCR1797	chr11:57583803-57583843[+]	CTNND1	NM_001331	2872	23-63
CCR1799	chr1:11114699-11114739[-]	SRM	NM_003132	273	183-223
CCR1801	chr2:174771410-174771450[-]	SP3	NM_003111	3482	3219-3259
CCR1803	chr5:58269666-58269706[-]	PDE4D	NM_006203	5625	785-825
CCR1806	chr7:138986220-138986260[+]	UBN2	NM_173569	10400	3638-3678
CCR1807	chr20:60883835-60883875[+]	ADRM1	NM_007002	101	18-58
CCR1811	chr13:30777431-30777471[-]	KATNAL1	NM_032116	5910	5206-5246
CCR1812	chr4:25279273-25279313[+]	PI4K2B	NM_018323	2022	464-504
CCR1814	chr8:67475358-67475398[-]	MYBL1	NM_001080416	2522	1534-1574
CCR1815	chr7:26252765-26252805[+]	CBX3	NM_007276	1148	937-977
CCR1817	chr5:121363170-121363210[+]	SRFBP1	NM_152546	1474	349-389
CCR1818	chr1:204374896-204374936[-]	PPP1R15B	NM_032833	2728	284-324
CCR1822	chr11:102267445-102267485[-]	TMEM123	NM_052932	2542	2113-2153
CCR1823	chr12:53805039-53805079[+]	SP1	NM_003109	5202	15-55
CCR1826	chr7:50512028-50512068[-]	FIGNL1	NM_022116	1129	893-933
CCR1829	chr9:116170657-116170697[-]	POLE3	NM_017443	1573	394-434
CCR1833	chr3:141012710-141012750[+]	ACPL2	NM_152282	1439	663-703
CCR1834	chr2:182794936-182794976[+]	SSFA2	NM_001130445	1190	662-702
CCR1834	chr2:182794936-182794976[+]	SSFA2	NM_006751	1081	553-593
CCR1835	chr1:114308068-114308108[-]	RSBN1	NM_018364	4148	494-534
CCR1839	chr4:77959295-77959335[+]	SEPT11	NM_018243	4103	3630-3670
CCR1844	chr5:40759982-40760022[-]	PRKAA1	NM_006251	3399	2858-2898
CCR1846	chr6:33180372-33180412[+]	RING1	NM_002931	323	196-236
CCR1848	chr15:49283627-49283667[-]	SECISBP2L	NM_014701	3606	774-814
CCR1850	chr4:6643561-6643601[+]	MRFAP1	NM_033296	1005	117-157
CCR1860	chr20:62271210-62271250[-]	STMN3	NM_015894	1630	1441-1481
CCR1866	chr12:69973476-69973516[+]	FRS2	NM_006654	4827	4741-4781
CCR1867	chr11:9610317-9610357[+]	WEE1	NM_003390	1164	168-208
CCR1870	chr21:34003207-34003247[-]	SYNJ1	NM_003895	2236	58-98
CCR1870	chr21:34003207-34003247[-]	SYNJ1	NM_203446	3046	868-908
CCR1874	chr17:70120986-70121026[+]	SOX9	NM_000346	2032	458-498
CCR1876	chr20:62221161-62221201[-]	GMEB2	NM_012384	2487	241-281
CCR1879	chr4:174252670-174252710[-]	HMGB2	NM_002129	704	521-561
CCR1880	chr8:57074311-57074351[-]	PLAG1	NM_002655	5334	4451-4491
CCR1883	chr20:44038989-44039029[+]	DBNDD2	NM_001048222	715	454-494
CCR1883	chr20:44038989-44039029[+]	DBNDD2	NM_018478	470	209-249
CCR1892	chr22:28146594-28146634[-]	MN1	NM_002430	2638	269-309
CCR1893	chr8:12580081-12580121[-]	LONRF1	NM_152271	1199	484-524
CCR1895	chr16:22092336-22092376[+]	C16orf52	NM_001164579	3771	135-175
CCR1898	chr12:77415196-77415236[-]	E2F7	NM_203394	2769	2559-2599
CCR1900	chr3:49021126-49021166[+]	ARIH2	NM_006321	2268	423-463
CCR1903	chr11:43877028-43877068[+]	HSD17B12	NM_016142	1371	230-270
CCR1904	chr7:128142012-128142052[+]	METTL2B	NM_018396	1008	42-82
CCR1907	chr11:67924352-67924392[-]	SUV420H1	NM_017635	1648	763-803
CCR1909	chrX:62569216-62569256[-]	SPIN4	NM_001012968	2842	693-733
CCR1911	chr19:47112628-47112668[+]	CALM3	NM_005184	1629	218-258
CCR1915	chr8:17426563-17426603[+]	SLC7A2	NM_003046	5422	3908-3948
CCR1920	chr1:39470125-39470165[+]	AKIRIN1	NM_024595	2010	398-438
CCR1925	chr6:52550946-52550986[+]	TMEM14A	NM_014051	538	99-139
CCR1927	chr4:57798355-57798395[+]	REST	NM_005612	3692	37-77
CCR1931	chr16:48385906-48385946[+]	LONP2	NM_031490	1694	193-233
CCR1933	chr2:120734795-120734835[+]	PTPN4	NM_002830	391	149-189
CCR1937	chr1:32799977-32800017[-]	MARCKSL1	NM_023009	758	181-221
CCR1939	chr20:3734532-3734572[-]	C20orf27	NM_001039140	547	133-173
CCR1940	chr13:42896995-42897035[+]	AKAP11	NM_016248	4038	3631-3671
CCR1942	chr13:42893667-42893707[+]	AKAP11	NM_016248	4038	303-343
CCR1943	chr7:115898563-115898603[+]	TES	NM_015641	1301	1027-1067
CCR1945	chr11:110038381-110038421[+]	ZC3H12C	NM_033390	6104	1919-1959
CCR1948	chr2:24286422-24286462[+]	FKBP1B	NM_004116	488	360-400
CCR1948	chr2:24286422-24286462[+]	FKBP1B	NM_054033	617	489-529
CCR1955	chr6:116572937-116572977[-]	TSPYL4	NM_021648	2796	950-990
CCR1959	chr15:69071868-69071908[-]	ANP32A	NM_006305	1545	512-552
CCR1960	chr3:88205985-88206025[+]	C3orf38	NM_173824	1330	200-240
CCR1964	chr1:32830850-32830890[-]	BSDC1	NM_018045	1518	1333-1373
CCR1967	chr12:42706680-42706720[-]	ZCRB1	NM_033114	981	149-189
CCR1972	chr17:27587955-27587995[-]	NUFIP2	NM_020772	8703	3562-3602
CCR1974	chr4:39780482-39780522[+]	UBE2K	NM_005339	4356	428-468
CCR1980	chr1:193054276-193054316[+]	TROVE2	NM_004600	1254	415-455
CCR1982	chr21:17251754-17251794[+]	USP25	NM_013396	1583	960-1000
CCR1984	chr1:93827352-93827392[+]	DR1	NM_001938	1952	1156-1196
CCR1985	chr7:66453232-66453272[-]	SBDS	NM_016038	668	86-126
CCR1986	chr15:55497593-55497633[-]	RAB27A	NM_004580	1905	72-112
CCR1987	chr8:22879981-22880021[-]	TNFRSF10B	NM_003842	2536	163-203
CCR1989	chr14:52196869-52196909[+]	FRMD6	NM_152330	2697	2122-2162
CCR1990	chr3:38532206-38532246[+]	ACVR2B	NM_001106	9810	7383-7423
CCR1992	chr22:30165674-30165714[+]	UQCR10	NM_001003684	756	28-68
CCR1993	chr9:94972923-94972963[-]	IARS	NM_002161	464	126-166
CCR1996	chr12:123351047-123351087[-]	VPS37B	NM_024667	1788	576-616
CCR2000	chr3:38024973-38025013[+]	CTDSPL	NM_005808	3602	2615-2655
CCR2003	chr4:17845192-17845232[-]	LCORL	NM_153686	2505	2112-2152
CCR2004	chr9:33917625-33917665[+]	UBE2R2	NM_017811	3166	390-430
CCR2007	chr1:57174776-57174816[+]	PRKAA2	NM_006252	7622	1390-1430
CCR2010	chr18:33689333-33689373[-]	SLC39A6	NM_012319	1062	183-223
CCR2011	chr1:120164758-120164798[-]	ZNF697	NM_001080470	3328	530-570
CCR2012	chrX:123047566-123047606[+]	XIAP	NM_001167	6791	6535-6575
CCR2018	chr12:76739277-76739317[-]	BBS10	NM_024685	1327	276-316
CCR2023	chr9:34086650-34086690[-]	DCAF12	NM_015397	1967	1658-1698
CCR2024	chr12:49223596-49223636[-]	DDX23	NM_004818	713	616-656
CCR2025	chr21:30301347-30301387[-]	LTN1	NM_015565	2304	1383-1423
CCR2027	chr11:6703296-6703336[-]	MRPL17	NM_022061	1733	13-53
CCR2029	chr2:48606202-48606242[+]	FOXN2	NM_002158	3852	3620-3660
CCR2031	chr9:112709207-112709247[+]	PALM2	NM_053016	8051	3502-3542
CCR2032	chr20:60550639-60550679[-]	TAF4	NM_003185	1370	545-585
CCR2033	chr1:51737550-51737590[+]	RNF11	NM_014372	2125	556-596
CCR2036	chr12:110479179-110479219[-]	C12orf76	NM_207435	1173	937-977
CCR2037	chr3:142775753-142775793[+]	U2SURP	NM_001080415	4275	461-501
CCR2039	chr6:34845651-34845691[-]	TAF11	NM_005643	812	676-716
CCR2040	chr2:33808887-33808927[-]	FAM98A	NM_015475	1114	916-956
CCR2043	chr7:151833303-151833343[-]	MLL3	NM_170606	1907	574-614
CCR2049	chr8:110586816-110586856[-]	SYBU	NM_017786	730	279-319
CCR2050	chr12:112946907-112946947[+]	PTPN11	NM_002834	4121	3311-3351
CCR2051	chr12:93895212-93895252[+]	MRPL42	NM_014050	1435	215-255
CCR2057	chr4:83344557-83344597[-]	HNRPDL	NM_031372	1712	1462-1502
CCR2067	chr1:26142838-26142878[+]	SEPN1	NM_020451	2504	629-669
CCR2069	chr18:12785653-12785693[-]	PTPN2	NM_080422	342	129-169
CCR2069	chr18:12785653-12785693[-]	PTPN2	NM_080423	339	129-169
CCR2072	chr3:120113374-120113414[-]	FSTL1	NM_007085	2738	2385-2425
CCR2075	chr10:98719706-98719746[+]	LCOR	NM_001170766	6023	1531-1571
CCR2075	chr10:98719706-98719746[+]	LCOR	NM_032440	8519	4027-4067
CCR2076	chr12:123776244-123776284[-]	SBNO1	NM_018183	6799	4171-4211
CCR2079	chr4:170641263-170641303[+]	CLCN3	NM_001829	1009	115-155
CCR2079	chr4:170641263-170641303[+]	CLCN3	NM_173872	941	47-87
CCR2081	chr12:42481392-42481432[-]	GXYLT1	NM_173601	5940	156-196
CCR2083	chr9:101915429-101915469[+]	TGFBR1	NM_004612	4886	3842-3882
CCR2084	chr2:231743021-231743061[+]	ITM2C	NM_030926	1149	207-247
CCR2085	chr16:23678907-23678947[+]	DCTN5	NM_032486	6603	442-482
CCR2088	chr5:79774071-79774111[+]	ZFYVE16	NM_014733	2302	875-915
CCR2089	chr12:112460746-112460786[+]	ERP29	NM_001034025	1053	775-815
CCR2089	chr12:112460746-112460786[+]	ERP29	NM_006817	568	290-330
CCR2090	chr20:32441502-32441542[+]	CHMP4B	NM_176812	807	136-176
CCR2091	chr5:37065416-37065456[+]	NIPBL	NM_015384	1796	1291-1331
CCR2091	chr5:37065416-37065456[+]	NIPBL	NM_133433	927	422-462
CCR2097	chr4:71850466-71850506[+]	MOB1B	NM_173468	6117	2692-2732
CCR2105	chr6:10397963-10398003[-]	TFAP2A	NM_003220	1734	647-687
CCR2106	chr3:153974556-153974596[+]	ARHGEF26	NM_015595	2354	1294-1334
CCR2108	chr17:44108553-44108593[-]	KANSL1	NM_015443	1560	249-289
CCR2111	chr22:18210462-18210502[+]	BCL2L13	NM_015367	1689	162-202
CCR2114	chr22:39910468-39910508[+]	SMCR7L	NM_019008	3809	140-180
CCR2115	chr22:38203356-38203396[+]	H1F0	NM_005318	1307	1220-1260
CCR2117	chr12:24965426-24965466[-]	BCAT1	NM_005504	7984	5476-5516
CCR2120	chr21:18966058-18966098[-]	BTG3	NM_006806	443	313-353
CCR2130	chr10:77158155-77158195[-]	ZNF503	NM_032772	904	312-352
CCR2132	chr3:38525786-38525826[+]	ACVR2B	NM_001106	9810	963-1003
CCR2138	chr6:30530651-30530691[+]	PRR3	NM_025263	2201	379-419
CCR2144	chr3:124951141-124951181[-]	ZNF148	NM_021964	6672	4-44
CCR2146	chr20:4680753-4680793[+]	PRNP	NM_000311	1606	125-165
CCR2153	chr12:108916699-108916739[-]	SART3	NM_014706	1243	495-535
CCR2154	chr17:46147499-46147539[-]	CBX1	NM_006807	1383	1258-1298
CCR2155	chr13:45967652-45967692[-]	SLC25A30	NM_001010875	2655	2417-2457
CCR2157	chr16:88874748-88874788[+]	CDT1	NM_030928	980	62-102
CCR2159	chr3:120048771-120048811[-]	LRRC58	NM_001099678	6471	1236-1276
CCR2163	chr6:64424263-64424303[+]	PHF3	NM_015153	801	659-699
CCR2175	chr15:52843144-52843184[-]	ARPP19	NM_006628	4699	947-987
CCR2179	chr6:47591968-47592008[+]	CD2AP	NM_012120	3033	5-45
CCR2181	chr11:85372873-85372913[-]	CREBZF	NM_001039618	6247	1942-1982
CCR2185	chr15:40513125-40513165[+]	BUB1B	NM_001211	377	165-205
CCR2188	chr17:17116175-17116215[-]	FLCN	NM_144997	1442	754-794
CCR2189	chr1:47842924-47842964[+]	CMPK1	NM_016308	2094	507-547
CCR2190	chr14:21967277-21967317[+]	TOX4	NM_014828	2555	2513-2553
CCR2193	chr12:109548065-109548105[+]	UNG	NM_003362	1024	291-331
CCR2195	chr1:185265993-185266033[-]	IVNS1ABP	NM_006469	1645	1134-1174
CCR2196	chr5:137772621-137772661[+]	KDM3B	NM_016604	1327	1232-1272
CCR2197	chr10:28971400-28971440[+]	BAMBI	NM_012342	538	70-110
CCR2198	chr5:134164630-134164670[+]	DDX46	NM_014829	2416	234-274
CCR2199	chr3:53317773-53317813[-]	DCP1A	NM_018403	4153	3785-3825
CCR2200	chr1:200521394-200521434[-]	KIF14	NM_014875	1891	1082-1122
CCR2201	chr7:133975983-133976023[-]	SLC35B4	NM_032826	5495	3562-3602
CCR2202	chr4:39783602-39783642[+]	UBE2K	NM_005339	4356	3548-3588
CCR2204	chr3:107528611-107528651[+]	BBX	NM_020235	5745	4307-4347
CCR2205	chr2:101623952-101623992[-]	TBC1D8	NM_001102426	593	291-331
CCR2208	chr1:1716748-1716788[-]	GNB1	NM_002074	1773	1714-1754
CCR2213	chr18:56063962-56064002[+]	NEDD4L	NM_015277	5271	461-501
CCR2215	chr7:94924586-94924626[+]	PPP1R9A	NM_017650	6112	4971-5011
CCR2222	chr8:22277271-22277311[+]	SLC39A14	NM_015359	3038	60-100
CCR2226	chr16:1751500-1751540[+]	HN1L	NM_144570	3074	2501-2541
CCR2228	chr19:13251918-13251958[+]	NACC1	NM_052876	2739	2698-2738
CCR2231	chr5:67594622-67594662[+]	PIK3R1	NM_181504	4220	1193-1233
CCR2232	chr19:10803028-10803068[+]	ILF3	NM_012218	3107	3040-3080
CCR2237	chr19:56102955-56102995[-]	FIZ1	NM_032836	1079	821-861
CCR2242	chr10:98718559-98718599[+]	LCOR	NM_001170766	6023	384-424
CCR2242	chr10:98718559-98718599[+]	LCOR	NM_032440	8519	2880-2920
CCR2245	chr15:23043688-23043728[-]	NIPA1	NM_144599	5550	5101-5141
CCR2248	chr12:25361943-25361983[-]	KRAS	NM_004985	4549	746-786
CCR2248	chr12:25361943-25361983[-]	KRAS	NM_033360	4670	867-907
CCR2252	chr21:43410789-43410829[-]	ZNF295	NM_020727	4064	175-215
CCR2253	chr16:46964339-46964379[+]	GPT2	NM_133443	2292	1430-1470
CCR2257	chr2:38522808-38522848[-]	ATL2	NM_001135673	1107	288-328
CCR2257	chr2:38522808-38522848[-]	ATL2	NM_022374	1596	777-817
CCR2261	chr19:37238149-37238189[-]	ZNF850	NM_001193552	4289	480-520
CCR2262	chr3:120048070-120048110[-]	LRRC58	NM_001099678	6471	1937-1977
CCR2265	chr7:50511891-50511931[-]	FIGNL1	NM_022116	1129	1030-1070
CCR2267	chr2:43450454-43450494[-]	ZFP36L2	NM_006887	1917	964-1004
CCR2269	chr14:55513665-55513705[+]	SOCS4	NM_080867	5124	2583-2623
CCR2272	chrX:118722547-118722587[-]	NKRF	NM_017544	1015	728-768
CCR2276	chr8:81433244-81433284[+]	ZBTB10	NM_023929	2847	1481-1521
CCR2277	chr16:66651024-66651064[-]	CMTM4	NM_178818	2527	116-156
CCR2277	chr16:66651024-66651064[-]	CMTM4	NM_181521	7308	4897-4937
CCR2282	chr12:121861411-121861451[+]	RNF34	NM_025126	776	32-72
CCR2283	chr2:61705356-61705396[-]	XPO1	NM_003400	886	559-599
CCR2285	chr13:39455212-39455252[+]	FREM2	NM_207361	6343	288-328
CCR2286	chr7:107400169-107400209[+]	CBLL1	NM_024814	2460	546-586
CCR2293	chr3:50392563-50392603[-]	TMEM115	NM_007024	594	171-211
CCR2294	chr20:62220746-62220786[-]	GMEB2	NM_012384	2487	656-696
CCR2301	chr19:12841576-12841616[-]	C19orf43	NM_024038	321	159-199
CCR2305	chr15:50570408-50570448[-]	GABPB1	NM_005254	1440	381-421
CCR2307	chrX:54097439-54097479[-]	FAM120C	NM_017848	4709	1987-2027
CCR2311	chr1:68942109-68942149[-]	DEPDC1	NM_017779	2780	466-506
CCR2312	chr15:73853174-73853214[-]	NPTN	NM_012428	1060	190-230
CCR2313	chr16:71766467-71766507[-]	AP1G1	NM_001128	4056	454-494
CCR2316	chr12:2913027-2913067[+]	FKBP4	NM_002014	2163	603-643
CCR2318	chr3:140697593-140697633[+]	SLC25A36	NM_018155	3490	2298-2338
CCR2319	chr4:85570197-85570237[+]	CDS1	NM_001263	2654	358-398
CCR2320	chr10:75879697-75879737[+]	VCL	NM_003373	1987	1770-1810
CCR2322	chr3:69154816-69154856[+]	ARL6IP5	NM_006407	1452	1029-1069
CCR2323	chr7:44866841-44866881[-]	H2AFV	NM_138635	3255	2862-2902
CCR2326	chrX:10413682-10413722[-]	MID1	NM_000381	4058	3686-3726
CCR2327	chr18:12449318-12449358[-]	SPIRE1	NM_020148	3126	279-319
CCR2328	chr11:12965842-12965882[+]	TEAD1	NM_021961	7515	7073-7113
CCR2330	chr17:63010283-63010323[-]	GNA13	NM_006572	4968	52-92
CCR2331	chr21:34948914-34948954[+]	SON	NM_138927	1082	184-224
CCR2334	chr1:32568370-32568410[+]	TMEM39B	NM_018056	193	96-136
CCR2336	chr9:99252758-99252798[+]	HABP4	NM_014282	1298	438-478
CCR2337	chr6:41067825-41067865[+]	NFYA	NM_002505	4997	2676-2716
CCR2339	chr5:151184700-151184740[+]	G3BP1	NM_005754	1263	1048-1088
CCR2340	chr9:139100453-139100493[-]	QSOX2	NM_181701	2392	81-121
CCR2341	chr3:151151112-151151152[+]	MED12L	NM_053002	3873	520-560
CCR2344	chr7:44919554-44919594[-]	PURB	NM_033224	8117	4415-4455
CCR2345	chr12:120750866-120750906[+]	SIRT4	NM_012240	206	27-67
CCR2346	chr1:182567978-182568018[-]	RGS16	NM_002928	1669	1409-1449
CCR2349	chr12:104341522-104341562[+]	HSP90B1	NM_003299	263	82-122
CCR2354	chr5:68647839-68647879[-]	TAF9	NM_016283	335	9-49
CCR2357	chr2:61029161-61029201[+]	PAPOLG	NM_022894	4926	4866-4906
CCR2359	chr11:9611213-9611253[+]	WEE1	NM_003390	1164	1064-1104
CCR2362	chr2:46988647-46988687[+]	SOCS5	NM_014011	2647	1367-1407
CCR2364	chr12:56863375-56863415[+]	SPRYD4	NM_207344	1406	14-54
CCR2366	chr2:174233334-174233374[+]	CDCA7	NM_031942	1326	942-982
CCR2370	chr15:79189819-79189859[+]	MORF4L1	NM_006791	665	410-450
CCR2371	chr14:104025947-104025987[-]	BAG5	NM_004873	3277	171-211
CCR2376	chr9:131834164-131834204[+]	FAM73B	NM_032809	1619	1432-1472
CCR2379	chr20:58521980-58522020[+]	FAM217B	NM_022106	3552	1830-1870
CCR2382	chr10:32300253-32300293[-]	KIF5B	NM_004521	2527	172-212
CCR2386	chr14:68213460-68213500[-]	ZFYVE26	NM_015346	1916	1653-1693
CCR2388	chr17:56567885-56567925[-]	MTMR4	NM_004687	2131	1099-1139
CCR2393	chr2:85548890-85548930[-]	TGOLN2	NM_006464	4713	929-969
CCR2397	chr9:74969152-74969192[-]	ZFAND5	NM_006007	4528	1677-1717
CCR2399	chr14:68143662-68143702[-]	RDH11	NM_016026	1519	1336-1376
CCR2403	chr7:100277892-100277932[-]	GIGYF1	NM_022574	2212	1410-1450
CCR2404	chr6:146121199-146121239[-]	FBXO30	NM_032145	1970	3-43
CCR2405	chr16:84156429-84156469[-]	HSDL1	NM_031463	2491	1766-1806
CCR2409	chr7:151074730-151074770[+]	NUB1	NM_016118	1221	419-459
CCR2410	chrX:102931043-102931083[-]	MORF4L2	NM_012286	663	6-46
CCR2417	chr17:56080490-56080530[-]	SRSF1	NM_001078166	4828	2578-2618
CCR2417	chr17:56080490-56080530[-]	SRSF1	NM_006924	4487	2237-2277
CCR2418	chr16:67181483-67181523[+]	C16orf70	NM_025187	1408	449-489
CCR2424	chr14:68143709-68143749[-]	RDH11	NM_016026	1519	1289-1329
CCR2425	chr12:72179473-72179513[+]	RAB21	NM_014999	1697	20-60
CCR2426	chr12:51380831-51380871[-]	SLC11A2	NM_000617	2333	1237-1277
CCR2429	chr13:42896085-42896125[+]	AKAP11	NM_016248	4038	2721-2761
CCR2433	chr17:53854636-53854676[+]	PCTP	NM_021213	1287	1175-1215
CCR2438	chr5:67595570-67595610[+]	PIK3R1	NM_181504	4220	2141-2181
CCR2441	chr17:7363488-7363528[-]	ZBTB4	NM_020899	2574	1731-1771
CCR2442	chr1:23687498-23687538[-]	ZNF436	NM_030634	2521	924-964
CCR2443	chr8:125323772-125323812[-]	TMEM65	NM_194291	3042	2389-2429
CCR2445	chr7:935769-935809[+]	GET4	NM_015949	1012	710-750
CCR2446	chr9:127910902-127910942[-]	PPP6C	NM_002721	3100	1010-1050
CCR2447	chr9:79000654-79000694[-]	RFK	NM_018339	1882	1621-1661
CCR2448	chr2:198256962-198257002[-]	SF3B1	NM_012433	329	25-65
CCR2450	chr19:32874800-32874840[+]	ZNF507	NM_014910	4584	811-851
CCR2451	chr12:111886295-111886335[+]	SH2B3	NM_005475	3321	189-229
CCR2459	chr19:37675637-37675677[-]	ZNF585B	NM_152279	3648	452-492
CCR2463	chr6:150047102-150047142[-]	NUP43	NM_198887	2648	963-1003
CCR2467	chr20:52184193-52184233[-]	ZNF217	NM_006526	2217	1594-1634
CCR2468	chr10:32300191-32300231[-]	KIF5B	NM_004521	2527	234-274
CCR2471	chr1:207219356-207219396[-]	YOD1	NM_018566	5171	2969-3009
CCR2480	chr7:138522016-138522056[-]	KIAA1549	NM_020910	6524	595-635
CCR2481	chr11:8126001-8126041[+]	TUB	NM_003320	4488	2835-2875
CCR2490	chr10:28342039-28342079[-]	MPP7	NM_173496	3071	915-955
CCR2491	chr8:17089051-17089091[-]	CNOT7	NM_054026	908	839-879
CCR2493	chr5:90664598-90664638[-]	ARRDC3	NM_020801	2676	2579-2619
CCR2498	chr3:180694486-180694526[+]	FXR1	NM_001013438	6613	560-600
CCR2498	chr3:180694486-180694526[+]	FXR1	NM_005087	6459	406-446
CCR2506	chr1:153779136-153779176[-]	GATAD2B	NM_020699	5450	3477-3517
CCR2508	chr12:50157806-50157846[+]	TMBIM6	NM_003217	2038	1127-1167
CCR2509	chr16:11963858-11963898[-]	GSPT1	NM_002094	4991	3078-3118
CCR2511	chr17:71205452-71205492[-]	FAM104A	NM_032837	2176	176-216
CCR2512	chr5:98129857-98129897[+]	RGMB	NM_001012761	2741	400-440
CCR2513	chr1:19586340-19586380[+]	MRTO4	NM_016183	1298	1016-1056
CCR2519	chr2:217366142-217366182[+]	RPL37A	NM_000998	61	15-55
CCR2520	chrX:154468033-154468073[+]	VBP1	NM_003372	975	910-950
CCR2523	chr7:108213833-108213873[+]	DNAJB9	NM_012328	1497	36-76
CCR2530	chr10:105205389-105205429[+]	PDCD11	NM_014976	713	83-123
CCR2531	chr7:66420624-66420664[+]	TMEM248	NM_017994	3029	115-155
CCR2534	chr10:27485996-27486036[-]	ACBD5	NM_145698	2216	323-363
CCR2538	chr18:12987093-12987133[+]	SEH1L	NM_001013437	480	37-77
CCR2538	chr18:12987093-12987133[+]	SEH1L	NM_031216	2285	1842-1882
CCR2540	chr5:56216972-56217012[-]	MIER3	NM_152622	3526	1943-1983
CCR2544	chr5:54515567-54515607[-]	MCI	NM_001190787	769	587-627
CCR2546	chr3:133538781-133538821[+]	SRPRB	NM_021203	1726	171-211
CCR2548	chr11:63529678-63529718[-]	C11orf95	NM_001144936	3526	1172-1212
CCR2549	chr4:108832821-108832861[+]	SGMS2	NM_152621	4495	1112-1152
CCR2550	chr6:10397407-10397447[-]	TFAP2A	NM_003220	1734	1203-1243
CCR2554	chr1:167395611-167395651[+]	POU2F1	NM_002697	11535	10564-10604
CCR2556	chr22:45583267-45583307[+]	NUP50	NM_007172	3354	2731-2771
CCR2559	chr5:98131864-98131904[+]	RGMB	NM_001012761	2741	2407-2447
CCR2560	chr19:3121400-3121440[+]	GNA11	NM_002067	277	223-263
CCR2561	chr17:61823063-61823103[-]	CCDC47	NM_020198	1631	1138-1178
CCR2562	chr17:26673940-26673980[+]	TNFAIP1	NM_021137	2409	2314-2354
CCR2564	chr7:36493142-36493182[+]	ANLN	NM_018685	1191	933-973
CCR2565	chr1:149914933-149914973[-]	OTUD7B	NM_020205	3524	783-823
CCR2567	chrX:24003467-24003507[-]	KLHL15	NM_030624	4205	2531-2571
CCR2569	chr12:117581787-117581827[-]	FBXO21	NM_015002	2307	2065-2105
CCR2570	chr4:77958845-77958885[+]	SEPT11	NM_018243	4103	3180-3220
CCR2572	chr6:151422663-151422703[+]	MTHFD1L	NM_015440	393	33-73
CCR2575	chr17:7757664-7757704[+]	KDM6B	NM_001080424	1279	825-865
CCR2578	chr9:111782009-111782049[-]	TMEM245	NM_032012	5325	691-731
CCR2580	chr2:55199700-55199740[-]	RTN4	NM_007008	965	552-592
CCR2581	chr2:206866975-206867015[-]	INO80D	NM_017759	10647	2077-2117
CCR2584	chr12:69784374-69784414[+]	YEATS4	NM_006530	480	278-318
CCR2585	chr2:216807858-216807898[-]	MREG	NM_018000	2272	1688-1728
CCR2586	chr2:55199759-55199799[-]	RTN4	NM_007008	965	493-533
CCR2589	chr1:67451442-67451482[+]	MIER1	NM_020948	3719	859-899
CCR2595	chr22:32077467-32077507[-]	PRR14L	NM_173566	4179	4006-4046
CCR2596	chr5:162946076-162946116[+]	MAT2B	NM_013283	959	707-747
CCR2597	chr21:16334985-16335025[-]	NRIP1	NM_003489	3481	2012-2052
CCR2600	chr5:65374720-65374760[+]	ERBB2IP	NM_018695	2492	362-402
CCR2601	chr3:48199991-48200031[-]	CDC25A	NM_001789	1767	404-444
CCR2606	chr13:96443876-96443916[+]	DNAJC3	NM_006260	3959	592-632
CCR2611	chr7:56067388-56067428[+]	GBAS	NM_001483	1106	623-663
CCR2612	chr6:20493326-20493366[+]	E2F3	NM_001949	3284	2665-2705
CCR2617	chr1:212534159-212534199[+]	PPP2R5A	NM_006243	1093	47-87
CCR2620	chr8:38174972-38175012[-]	WHSC1L1	NM_017778	1539	462-502
CCR2621	chr5:137087603-137087643[-]	HNRNPA0	NM_006805	1765	1195-1235
CCR2624	chr13:50489124-50489164[-]	SPRYD7	NM_020456	2357	35-75
CCR2625	chr14:55512799-55512839[+]	SOCS4	NM_080867	5124	1717-1757
CCR2629	chr19:19619507-19619547[+]	GATAD2A	NM_017660	3458	3224-3264
CCR2631	chr19:12841703-12841743[-]	C19orf43	NM_024038	321	32-72
CCR2633	chr4:83345889-83345929[-]	HNRPDL	NM_031372	1712	130-170
CCR2634	chr12:69663437-69663477[+]	CPSF6	NM_007007	4850	149-189
CCR2636	chr4:2070772-2070812[+]	NAT8L	NM_178557	4962	4918-4958
CCR2639	chr10:53457102-53457142[-]	CSTF2T	NM_015235	2213	317-357
CCR2642	chr13:48650828-48650868[-]	MED4	NM_014166	1183	407-447
CCR2648	chr11:60690294-60690334[+]	TMEM109	NM_024092	1278	657-697
CCR2655	chr11:22844270-22844310[-]	SVIP	NM_148893	1067	355-395
CCR2656	chr15:77241859-77241899[+]	RCN2	NM_002902	1038	296-336
CCR2657	chr1:85718064-85718104[-]	C1orf52	NM_198077	2675	208-248
CCR2658	chrX:109440486-109440526[-]	AMMECR1	NM_015365	4334	1222-1262
CCR2660	chr1:231471019-231471059[-]	EXOC8	NM_175876	2832	255-295
CCR2662	chr12:95694807-95694847[+]	VEZT	NM_017599	2117	358-398
CCR2663	chr4:174253045-174253085[-]	HMGB2	NM_002129	704	146-186
CCR2665	chr3:43760405-43760445[+]	ABHD5	NM_016006	4193	381-421
CCR2667	chr6:7251421-7251461[+]	RREB1	NM_001003698	3012	2220-2260
CCR2670	chrX:72901387-72901427[+]	CHIC1	NM_001039840	6097	547-587
CCR2671	chr13:100616931-100616971[-]	ZIC5	NM_033132	2356	660-700
CCR2674	chr14:55535894-55535934[+]	MAPK1IP1L	NM_144578	5567	4549-4589
CCR2675	chr3:71821792-71821832[-]	PROK2	NM_021935	1069	43-83
CCR2678	chr21:16334754-16334794[-]	NRIP1	NM_003489	3481	2243-2283
CCR2682	chr17:73841815-73841855[-]	WBP2	NM_012478	1035	960-1000
CCR2684	chr9:94794069-94794109[-]	SPTLC1	NM_006415	1320	638-678
CCR2686	chr7:90897823-90897863[+]	FZD1	NM_003505	1993	1684-1724
CCR2687	chr20:627883-627923[-]	SRXN1	NM_080725	2090	1435-1475
CCR2688	chr2:24222910-24222950[+]	UBXN2A	NM_181713	956	173-213
CCR2694	chr8:42692858-42692898[-]	THAP1	NM_018105	1288	207-247
CCR2694	chr8:42692858-42692898[-]	THAP1	NM_199003	1572	491-531
CCR2695	chr16:69737286-69737326[+]	NFAT5	NM_006599	8299	7032-7072
CCR2699	chr2:32249007-32249047[-]	DPY30	NM_032574	281	206-246
CCR2702	chr8:67772331-67772371[+]	SGK3	NM_013257	2441	515-555
CCR2703	chr2:62451441-62451481[+]	B3GNT2	NM_006577	1317	892-932
CCR2706	chr1:62916950-62916990[+]	USP1	NM_003368	823	298-338
CCR2707	chr17:17968801-17968841[+]	C17orf39	NM_024052	3161	244-284
CCR2710	chr11:115047034-115047074[-]	CADM1	NM_014333	2849	120-160
CCR2711	chr7:73643335-73643375[+]	LAT2	NM_014146	909	80-120
CCR2719	chr1:55532155-55532195[-]	USP24	NM_015306	2686	2523-2563
CCR2720	chr4:144474341-144474381[+]	SMARCA5	NM_003601	230	4-44
CCR2721	chr19:37674673-37674713[-]	ZNF585B	NM_152279	3648	1416-1456
CCR2724	chr5:98131462-98131502[+]	RGMB	NM_001012761	2741	2005-2045
CCR2726	chr9:73001883-73001923[-]	KLF9	NM_001206	3179	769-809
CCR2729	chr19:11033052-11033092[+]	CARM1	NM_199141	1015	619-659
CCR2730	chrX:100601154-100601194[-]	TIMM8A	NM_004085	843	293-333
CCR2733	chr3:142776913-142776953[+]	U2SURP	NM_001080415	4275	1621-1661
CCR2735	chr10:121590884-121590924[-]	MCMBP	NM_024834	2014	62-102
CCR2737	chr4:183721693-183721733[+]	ODZ3	NM_001080477	2673	189-229
CCR2739	chr14:54894288-54894328[-]	CNIH	NM_005776	885	204-244
CCR2743	chr6:21597263-21597303[+]	SOX4	NM_003107	2659	1073-1113
CCR2744	chr8:124027298-124027338[-]	DERL1	NM_024295	2119	349-389
CCR2747	chr20:35222202-35222242[+]	TGIF2	NM_021809	2518	2368-2408
CCR2750	chrX:39911282-39911322[-]	BCOR	NM_017745	863	40-80
CCR2751	chr2:151326118-151326158[-]	RND3	NM_005168	1791	343-383
CCR2753	chr6:1613017-1613057[+]	FOXC1	NM_001453	1787	675-715
CCR2755	chrX:24003303-24003343[-]	KLHL15	NM_030624	4205	2695-2735
CCR2757	chr1:16722785-16722825[+]	C1orf144	NM_015609	3005	1150-1190
CCR2760	chr1:161333894-161333934[+]	SDHC	NM_001035511	2205	1564-1604
CCR2760	chr1:161333894-161333934[+]	SDHC	NM_003001	2312	1671-1711
CCR2762	chr20:48521124-48521164[-]	SPATA2	NM_006038	2227	992-1032
CCR2768	chr6:3113887-3113927[+]	RIPK1	NM_003804	1848	314-354
CCR2769	chr1:244219186-244219226[+]	ZNF238	NM_006352	2106	514-554
CCR2770	chr10:103606750-103606790[-]	C10orf76	NM_024541	1929	495-535
CCR2771	chrX:48761056-48761096[-]	SLC35A2	NM_001032289	977	771-811
CCR2771	chrX:48761056-48761096[-]	SLC35A2	NM_001042498	1115	908-948
CCR2774	chr15:63363551-63363591[+]	TPM1	NM_001018004	742	180-220
CCR2775	chr12:58153065-58153105[+]	MARCH9	NM_138396	1009	385-425
CCR2776	chr5:65120375-65120415[+]	NLN	NM_020726	6368	1632-1672
CCR2778	chr10:98718891-98718931[+]	LCOR	NM_001170766	6023	716-756
CCR2778	chr10:98718891-98718931[+]	LCOR	NM_032440	8519	3212-3252
CCR2779	chr14:67800507-67800547[+]	MPP5	NM_022474	2863	834-874
CCR2781	chr5:64886442-64886482[-]	TRIM23	NM_001656	2089	1114-1154
CCR2785	chr19:15533104-15533144[-]	WIZ	NM_021241	1569	743-783
CCR2790	chr7:108203362-108203402[-]	THAP5	NM_182529	1964	1233-1273
CCR2792	chr22:21307415-21307455[+]	CRKL	NM_005207	3904	3282-3322
CCR2796	chr6:107980493-107980533[+]	SOBP	NM_018013	3106	1086-1126
CCR2798	chr2:128495062-128495102[-]	WDR33	NM_001006623	2625	477-517
CCR2800	chr5:139947820-139947860[+]	SLC35A4	NM_080670	954	91-131
CCR2813	chr6:10398533-10398573[-]	TFAP2A	NM_003220	1734	77-117
CCR2814	chr17:17396473-17396513[+]	MED9	NM_018019	1725	1664-1704
CCR2815	chr5:133292472-133292512[-]	C5orf15	NM_020199	1352	38-78
CCR2819	chr11:57067387-57067427[-]	TNKS1BP1	NM_033396	465	141-181
CCR2822	chr1:113456328-113456368[-]	SLC16A1	NM_003051	2043	145-185
CCR2823	chr8:124515489-124515529[-]	FBXO32	NM_058229	255	84-124
CCR2824	chr13:30776834-30776874[-]	KATNAL1	NM_032116	5910	5803-5843
CCR2826	chr4:10075995-10076035[-]	WDR1	NM_005112	1039	967-1007
CCR2831	chr1:19665964-19666004[-]	CAPZB	NM_004930	757	20-60
CCR2832	chr7:27210340-27210380[-]	HOXA10	NM_018951	1308	1138-1178
CCR2833	chr16:24835658-24835698[+]	TNRC6A	NM_014494	2419	530-570
CCR2837	chr19:41813475-41813515[+]	HNRNPUL1	NM_007040	1341	1005-1045
CCR2842	chr19:57772452-57772492[+]	ZNF805	NM_001023563	8035	6381-6421
CCR2844	chr6:160199893-160199933[-]	TCP1	NM_030752	547	144-184
CCR2849	chr2:191068022-191068062[+]	C2orf88	NM_032321	3336	3148-3188
CCR2850	chr17:46690123-46690163[-]	HOXB8	NM_024016	856	401-441
CCR2853	chr12:42553296-42553336[-]	YAF2	NM_005748	3484	1055-1095
CCR2855	chr5:162945448-162945488[+]	MAT2B	NM_013283	959	79-119
CCR2856	chr7:148767150-148767190[-]	ZNF786	NM_152411	782	325-365
CCR2864	chr17:34051139-34051179[+]	AP2B1	NM_001282	2718	421-461
CCR2866	chr3:4888245-4888285[+]	ITPR1	NM_002222	1615	336-376
CCR2867	chr19:12810696-12810736[-]	TNPO2	NM_013433	2070	1342-1382
CCR2869	chr6:116571415-116571455[-]	TSPYL4	NM_021648	2796	2472-2512
CCR2870	chr5:52397983-52398023[-]	MOCS2	NM_176806	1024	50-90
CCR2873	chr12:50184970-50185010[-]	NCKAP5L	NM_001037806	693	612-652
CCR2875	chr17:28792695-28792735[+]	CPD	NM_001304	3867	863-903
CCR2876	chr19:13249270-13249310[+]	NACC1	NM_052876	2739	50-90
CCR2877	chr4:57798722-57798762[+]	REST	NM_005612	3692	404-444
CCR2887	chr20:36720387-36720427[+]	RPRD1B	NM_021215	2489	2110-2150
CCR2888	chr16:72820426-72820466[-]	ZFHX3	NM_006885	4277	597-637
CCR2890	chr9:79001724-79001764[-]	RFK	NM_018339	1882	551-591
CCR2894	chr17:74731755-74731795[-]	SRSF2	NM_003016	2044	448-488
CCR2903	chr12:56295403-56295443[-]	WIBG	NM_032345	459	213-253
CCR2906	chr1:162498118-162498158[+]	UHMK1	NM_144624	7215	5914-5954
CCR2906	chr1:162498118-162498158[+]	UHMK1	NM_175866	7079	5778-5818
CCR2908	chr3:196663639-196663679[-]	NCBP2	NM_007362	1609	203-243
CCR2909	chr8:26362502-26362542[-]	PNMA2	NM_007257	2981	2635-2675
CCR2911	chr11:6505656-6505696[+]	FXC1	NM_012192	2460	2205-2245
CCR2913	chr22:40723247-40723287[+]	TNRC6B	NM_015088	12567	4002-4042
CCR2914	chr22:50357667-50357707[+]	PIM3	NM_001001852	945	892-932
CCR2915	chr12:53908806-53908846[-]	ATF7	NM_006856	5078	2075-2115
CCR2917	chr7:120427437-120427477[-]	TSPAN12	NM_012338	1272	1169-1209
CCR2918	chr22:32080636-32080676[-]	PRR14L	NM_173566	4179	837-877
CCR2925	chr17:65987792-65987832[-]	C17orf58	NM_181655	812	197-237
CCR2925	chr17:65987792-65987832[-]	C17orf58	NM_181656	1021	406-446
CCR2926	chr12:26221890-26221930[+]	RASSF8	NM_001164746	4056	139-179
CCR2934	chr20:61431754-61431794[+]	C20orf20	NM_018270	950	759-799
CCR2939	chr14:45669256-45669296[+]	FANCM	NM_020937	882	45-85
CCR2941	chr21:37748719-37748759[+]	MORC3	NM_015358	1350	1125-1165
CCR2947	chr19:10597203-10597243[-]	KEAP1	NM_012289	532	85-125
CCR2951	chr15:75931438-75931478[-]	IMP3	NM_018285	529	477-517
CCR2957	chr20:25426775-25426815[+]	GINS1	NM_021067	2564	148-188
CCR2958	chr15:92708118-92708158[+]	SLCO3A1	NM_013272	2772	1753-1793
CCR2961	chr12:69666900-69666940[+]	CPSF6	NM_007007	4850	3612-3652
CCR2962	chr16:15960348-15960388[-]	FOPNL	NM_144600	1720	909-949
CCR2970	chr1:167757370-167757410[+]	MPZL1	NM_003953	3998	212-252
CCR2970	chr1:167757370-167757410[+]	MPZL1	NM_024569	4075	289-329
CCR2971	chr19:53995350-53995390[+]	ZNF813	NM_001004301	2206	10-50
CCR2974	chr6:136664253-136664293[-]	MAP7	NM_003980	1947	1073-1113
CCR2976	chr5:77781916-77781956[-]	LHFPL2	NM_005779	3682	2764-2804
CCR2980	chr18:43843448-43843488[+]	C18orf25	NM_145055	3874	367-407
CCR2982	chr1:155883265-155883305[-]	KIAA0907	NM_014949	1076	607-647
CCR2983	chr14:64151375-64151415[-]	SGPP1	NM_030791	1888	1408-1448
CCR2984	chr5:134364184-134364224[-]	PITX1	NM_002653	1045	245-285
CCR2985	chr5:71503260-71503300[+]	MAP1B	NM_005909	4331	2194-2234
CCR2990	chr10:15254726-15254766[-]	FAM171A1	NM_001010924	1270	148-188
CCR2993	chr3:86995941-86995981[-]	VGLL3	NM_016206	9051	193-233
CCR3000	chr20:32442099-32442139[+]	CHMP4B	NM_176812	807	733-773
CCR3001	chr17:56080528-56080568[-]	SRSF1	NM_001078166	4828	2540-2580
CCR3001	chr17:56080528-56080568[-]	SRSF1	NM_006924	4487	2199-2239
CCR3004	chr11:67023260-67023300[+]	KDM2A	NM_012308	3024	734-774
CCR3007	chr1:151264943-151264983[-]	PI4KB	NM_002651	1055	345-385
CCR3010	chr20:2125730-2125770[+]	STK35	NM_080836	4806	1338-1378
CCR3012	chr2:48605528-48605568[+]	FOXN2	NM_002158	3852	2946-2986
CCR3013	chr12:66517526-66517566[-]	LLPH	NM_032338	771	54-94
CCR3014	chr4:123819088-123819128[+]	FGF2	NM_002006	5839	5537-5577
CCR3026	chr10:63853536-63853576[+]	ARID5B	NM_032199	3918	747-787
CCR3028	chr13:107145181-107145221[-]	EFNB2	NM_004093	3292	167-207
CCR3029	chr11:35016951-35016991[+]	PDHX	NM_003477	956	232-272
CCR3030	chr4:149002050-149002090[-]	NR3C2	NM_000901	2580	405-445
CCR3032	chr6:150570417-150570457[+]	PPP1R14C	NM_030949	1572	461-501
CCR3033	chr12:112599894-112599934[-]	C12orf51	NM_001109662	2199	257-297
CCR3034	chr1:100547970-100548010[+]	HIAT1	NM_033055	1164	205-245
CCR3036	chr11:9468225-9468265[+]	IPO7	NM_006391	2933	1484-1524
CCR3038	chr19:45406828-45406868[+]	TOMM40	NM_006114	520	402-442
CCR3039	chr6:3224737-3224777[-]	TUBB2B	NM_178012	490	208-248
CCR3043	chr6:125404260-125404300[+]	RNF217	NM_152553	618	217-257
CCR3046	chr10:72639688-72639728[+]	SGPL1	NM_003901	3840	2596-2636
CCR3047	chr8:103661326-103661366[-]	KLF10	NM_005655	1355	994-1034
CCR3052	chr1:224348694-224348734[+]	FBXO28	NM_001136115	4672	3617-3657
CCR3052	chr1:224348694-224348734[+]	FBXO28	NM_015176	4301	3246-3286
CCR3053	chr18:9859670-9859710[+]	RAB31	NM_006868	3231	348-388
CCR3055	chr17:73774632-73774672[-]	H3F3B	NM_005324	2161	4-44
CCR3057	chr1:38268657-38268697[-]	YRDC	NM_024640	983	900-940
CCR3061	chr1:182353499-182353539[-]	GLUL	NM_002065	2701	1-41
CCR3064	chr22:28249306-28249346[-]	PITPNB	NM_012399	2033	344-384
CCR3068	chr11:94609423-94609463[+]	AMOTL1	NM_130847	5958	5463-5503
CCR3069	chr1:23412795-23412835[-]	LUZP1	NM_033631	4872	2553-2593
CCR3073	chr3:152554932-152554972[+]	P2RY1	NM_002563	1150	239-279
CCR3076	chr4:95587476-95587516[+]	PDLIM5	NM_006457	4159	2258-2298
CCR3080	chr17:47127595-47127635[+]	IGF2BP1	NM_006546	6701	789-829
CCR3082	chr5:171290320-171290360[-]	FBXW11	NM_012300	2575	771-811
CCR3086	chr2:110374885-110374925[+]	SOWAHC	NM_023016	2920	1241-1281
CCR3087	chr14:55513352-55513392[+]	SOCS4	NM_080867	5124	2270-2310
CCR3089	chr3:107527088-107527128[+]	BBX	NM_020235	5745	2784-2824
CCR3090	chr11:60690696-60690736[+]	TMEM109	NM_024092	1278	1059-1099
CCR3094	chr10:89514114-89514154[-]	ATAD1	NM_032810	1569	290-330
CCR3096	chr10:99196011-99196051[-]	EXOSC1	NM_016046	536	151-191
CCR3097	chr6:32949045-32949085[+]	BRD2	NM_005104	787	550-590
CCR3098	chr16:23533565-23533605[-]	EARS2	NM_001083614	2358	2087-2127
CCR3099	chr12:25358444-25358484[-]	KRAS	NM_004985	4549	4245-4285
CCR3099	chr12:25358444-25358484[-]	KRAS	NM_033360	4670	4366-4406
CCR3103	chr7:40134739-40134779[+]	CDK13	NM_003718	2154	160-200
CCR3104	chr8:33229811-33229851[-]	FUT10	NM_032664	1751	244-284
CCR3109	chr1:233519101-233519141[+]	KIAA1804	NM_032435	2437	644-684
CCR3116	chr11:60689705-60689745[+]	TMEM109	NM_024092	1278	68-108
CCR3120	chrX:102006901-102006941[+]	BHLHB9	NM_030639	1802	1334-1374
CCR3122	chr11:68380665-68380705[+]	PPP6R3	NM_018312	2216	80-120
CCR3123	chr19:1038935-1038975[+]	CNN2	NM_004368	1165	1036-1076
CCR3124	chr17:18111737-18111777[+]	ALKBH5	NM_017758	1557	27-67
CCR3128	chr6:36570031-36570071[+]	SRSF3	NM_003017	2478	265-305
CCR3129	chr8:94744999-94745039[-]	RBM12B	NM_203390	1902	594-634
CCR3131	chr4:185549980-185550020[-]	CASP3	NM_004346	1576	406-446
CCR3138	chr1:183595731-183595771[-]	ARPC5	NM_005717	1335	896-936
CCR3143	chr20:49506883-49506923[-]	ADNP	NM_015339	1059	1019-1059
CCR3145	chr14:50713719-50713759[-]	L2HGDH	NM_024884	4624	17-57
CCR3146	chr3:37408054-37408094[+]	GOLGA4	NM_001172713	776	460-500
CCR3146	chr3:37408054-37408094[+]	GOLGA4	NM_002078	833	517-557
CCR3150	chr17:34945969-34946009[+]	GGNBP2	NM_024835	435	128-168
CCR3153	chr4:95587774-95587814[+]	PDLIM5	NM_006457	4159	2556-2596
CCR3156	chr20:55214064-55214104[+]	TFAP2C	NM_003222	1269	995-1035
CCR3159	chr2:20648312-20648352[+]	RHOB	NM_004040	1384	495-535
CCR3161	chr6:99847992-99848032[-]	PNISR	NM_015491	575	384-424
CCR3164	chr5:14698067-14698107[+]	FAM105B	NM_138348	6685	4910-4950
CCR3170	chr6:26598900-26598940[+]	ABT1	NM_013375	1404	27-67
CCR3171	chr1:224573261-224573301[-]	WDR26	NM_025160	4692	4236-4276
CCR3174	chr6:111620380-111620420[-]	REV3L	NM_002912	985	799-839
CCR3175	chr21:40195391-40195431[+]	ETS2	NM_005239	2065	578-618
CCR3176	chr16:67133281-67133321[+]	CBFB	NM_001755	2323	646-686
CCR3176	chr16:67133281-67133321[+]	CBFB	NM_022845	2277	600-640
CCR3179	chr9:135565327-135565367[+]	GTF3C4	NM_012204	1138	995-1035
CCR3182	chr1:207222131-207222171[-]	YOD1	NM_018566	5171	194-234
CCR3184	chr7:66274471-66274511[+]	RABGEF1	NM_014504	2177	200-240
CCR3188	chr21:45524635-45524675[+]	TRAPPC10	NM_003274	3020	1223-1263
CCR3192	chr12:64587467-64587507[-]	C12orf66	NM_152440	1203	115-155
CCR3194	chr6:160219175-160219215[+]	MRPL18	NM_014161	306	20-60
CCR3195	chr21:15745826-15745866[-]	HSPA13	NM_006948	2501	72-112
CCR3199	chr17:28795324-28795364[+]	CPD	NM_001304	3867	3492-3532
CCR3200	chr1:24086450-24086490[+]	TCEB3	NM_003198	2486	387-427
CCR3206	chr4:82348649-82348689[-]	RASGEF1B	NM_152545	703	233-273
CCR3207	chr1:94354027-94354067[-]	GCLM	NM_002061	1956	479-519
CCR3208	chr12:27953839-27953879[+]	KLHDC5	NM_020782	4874	2740-2780
CCR3211	chr6:105526681-105526721[+]	LIN28B	NM_001004317	4548	23-63
CCR3216	chr1:26451632-26451672[+]	PDIK1L	NM_152835	2958	2564-2604
CCR3220	chr1:197474855-197474895[-]	DENND1B	NM_001195215	5711	4695-4735
CCR3221	chr5:172561637-172561677[+]	CREBRF	NM_153607	5543	889-929
CCR3222	chr3:88206150-88206190[+]	C3orf38	NM_173824	1330	365-405
CCR3226	chrX:69506729-69506769[-]	PDZD11	NM_016484	721	163-203
CCR3227	chrX:150574429-150574469[+]	VMA21	NM_001017980	4306	899-939
CCR3228	chr7:117832270-117832310[+]	NAA38	NM_016200	12037	214-254
CCR3229	chr19:11033703-11033743[-]	YIPF2	NM_024029	426	127-167
CCR3230	chr12:51379905-51379945[-]	SLC11A2	NM_000617	2333	2163-2203
CCR3239	chr5:132211462-132211502[-]	AFF4	NM_014423	5680	5249-5289
CCR3245	chr1:228880548-228880588[+]	RHOU	NM_021205	2924	1061-1101
CCR3247	chr16:20871074-20871114[-]	DCUN1D3	NM_173475	1812	94-134
CCR3248	chr8:123986262-123986302[+]	ZHX2	NM_014943	1278	785-825
CCR3250	chr1:181059282-181059322[+]	IER5	NM_016545	957	260-300
CCR3251	chr1:203277409-203277449[+]	BTG2	NM_006763	2163	843-883
CCR3253	chr1:151376824-151376864[-]	POGZ	NM_015100	2078	414-454
CCR3254	chr10:98281178-98281218[-]	TM9SF3	NM_020123	4153	802-842
CCR3256	chr16:69358489-69358529[+]	VPS4A	NM_013245	734	277-317
CCR3260	chr14:92247578-92247618[-]	TC2N	NM_152332	3177	1826-1866
CCR3264	chr15:59387300-59387340[+]	RNF111	NM_017610	2154	201-241
CCR3266	chr22:24968025-24968065[+]	SNRPD3	NM_004175	564	80-120
CCR3268	chr12:12874139-12874179[+]	CDKN1B	NM_004064	1344	178-218
CCR3270	chr1:201104649-201104689[-]	TMEM9	NM_016456	891	102-142
CCR3274	chr19:14626541-14626581[-]	DNAJB1	NM_006145	1170	171-211
CCR3275	chr14:58738631-58738671[+]	PSMA3	NM_002788	113	18-58
CCR3282	chr3:88101442-88101482[-]	CGGBP1	NM_003663	3523	3141-3181
CCR3288	chr19:52519046-52519086[-]	ZNF614	NM_025040	2516	7-47
CCR3299	chr2:74330178-74330218[+]	TET3	NM_144993	5999	875-915
CCR3302	chrX:48771215-48771255[-]	PIM2	NM_006875	949	153-193
CCR3303	chr3:15482692-15482732[+]	EAF1	NM_033083	3458	2030-2070
CCR3304	chr20:35220967-35221007[+]	TGIF2	NM_021809	2518	1133-1173
CCR3305	chr15:56122006-56122046[-]	NEDD4	NM_006154	2973	49-89
CCR3308	chr12:69971619-69971659[+]	FRS2	NM_006654	4827	2884-2924
CCR3311	chr12:88589515-88589555[+]	TMTC3	NM_181783	4238	89-129
CCR3312	chr6:21598783-21598823[+]	SOX4	NM_003107	2659	2593-2633
CCR3314	chr5:56218081-56218121[-]	MIER3	NM_152622	3526	834-874
CCR3316	chr1:207968004-207968044[+]	CD46	NM_002389	2039	1182-1222
CCR3316	chr1:207968004-207968044[+]	CD46	NM_153826	1925	1068-1108
CCR3316	chr1:207968004-207968044[+]	CD46	NM_172350	1921	1064-1104
CCR3318	chr12:120878376-120878416[+]	COX6A1	NM_004373	189	36-76
CCR3320	chr17:76102477-76102517[+]	TNRC6C	NM_018996	3990	1551-1591
CCR3321	chr12:113734686-113734726[+]	TPCN1	NM_017901	2508	805-845
CCR3324	chr7:87028321-87028361[+]	CROT	NM_021151	1152	361-401
CCR3325	chr4:38701732-38701772[+]	KLF3	NM_016531	4245	2848-2888
CCR3326	chr1:145511190-145511230[+]	RBM8A	NM_005105	2233	1979-2019
CCR3327	chr10:75002815-75002855[-]	DNAJC9	NM_015190	576	303-343
CCR3330	chr1:28177029-28177069[+]	PPP1R8	NM_002713	1226	72-112
CCR3333	chr5:108671665-108671705[-]	PJA2	NM_014819	2522	1227-1267
CCR3335	chr7:155255746-155255786[+]	EN2	NM_001427	2144	364-404
CCR3337	chr19:12090891-12090931[+]	ZNF763	NM_001012753	1274	967-1007
CCR3338	chr20:36146233-36146273[-]	BLCAP	NM_006698	1494	1040-1080
CCR3340	chr6:71269641-71269681[+]	FAM135A	NM_020819	1253	17-57
CCR3344	chr3:52581529-52581569[-]	PBRM1	NM_018165	2711	510-550
CCR3346	chr16:30003337-30003377[+]	TAOK2	NM_004783	692	448-488
CCR3348	chr6:10983589-10983629[-]	ELOVL2	NM_017770	3021	385-425
CCR3351	chr11:102100812-102100852[+]	YAP1	NM_006106	3483	141-181
CCR3354	chr21:34948992-34949032[+]	SON	NM_138927	1082	262-302
CCR3355	chr7:89862152-89862192[+]	STEAP2	NM_152999	5054	214-254
CCR3357	chr1:52498062-52498102[-]	KTI12	NM_138417	592	267-307
CCR3358	chr11:18628931-18628971[-]	SPTY2D1	NM_194285	3460	2437-2477
CCR3360	chr17:59943241-59943281[-]	INTS2	NM_020748	2190	1637-1677
CCR3361	chr19:8027309-8027349[-]	ELAVL1	NM_001419	4910	1018-1058
CCR3362	chr1:160187295-160187335[-]	DCAF8	NM_015726	1877	47-87
CCR3363	chr2:197700542-197700582[-]	PGAP1	NM_024989	8230	5376-5416
CCR3365	chr15:70341501-70341541[-]	TLE3	NM_005078	1893	895-935
CCR3366	chr5:68737754-68737794[+]	MARVELD2	NM_001038603	409	273-313
CCR3370	chr14:50575649-50575689[-]	METTL21D	NM_024558	1067	728-768
CCR3374	chr1:154917331-154917371[-]	PBXIP1	NM_020524	941	129-169
CCR3378	chr19:58199752-58199792[+]	ZNF551	NM_138347	1513	96-136
CCR3381	chr4:2233403-2233443[-]	HAUS3	NM_024511	3558	211-251
CCR3382	chr7:22984903-22984943[-]	FAM126A	NM_032581	4330	265-305
CCR3383	chr21:45193865-45193905[-]	CSTB	NM_000100	252	178-218
CCR3384	chr7:99489391-99489431[-]	TRIM4	NM_033017	1756	355-395
CCR3386	chr4:115597729-115597769[+]	UGT8	NM_003360	758	285-325
CCR3389	chr12:124145103-124145143[+]	GTF2H3	NM_001516	552	321-361
CCR3391	chr4:90647035-90647075[-]	SNCA	NM_000345	2529	704-744
CCR3392	chr3:128532739-128532779[+]	RAB7A	NM_004637	1376	474-514
CCR3394	chr19:10427983-10428023[-]	RAVER1	NM_133452	1241	107-147
CCR3395	chr2:178088611-178088651[+]	HNRNPA3	NM_194247	4565	4491-4531
CCR3398	chr21:45525973-45526013[+]	TRAPPC10	NM_003274	3020	2561-2601
CCR3403	chr1:224346630-224346670[+]	FBXO28	NM_001136115	4672	1553-1593
CCR3403	chr1:224346630-224346670[+]	FBXO28	NM_015176	4301	1182-1222
CCR3407	chr19:1227841-1227881[+]	STK11	NM_000455	859	266-306
CCR3412	chr2:178480220-178480260[-]	TTC30A	NM_152275	2406	1172-1212
CCR3414	chr10:53455663-53455703[-]	CSTF2T	NM_015235	2213	1756-1796
CCR3419	chr3:180694633-180694673[+]	FXR1	NM_001013438	6613	707-747
CCR3419	chr3:180694633-180694673[+]	FXR1	NM_005087	6459	553-593
CCR3423	chr1:224345419-224345459[+]	FBXO28	NM_001136115	4672	342-382
CCR3424	chr5:112352506-112352546[+]	DCP2	NM_152624	7486	3325-3365
CCR3432	chr1:70728268-70728308[-]	ANKRD13C	NM_030816	3715	92-132
CCR3434	chr10:63856400-63856440[+]	ARID5B	NM_032199	3918	3611-3651
CCR3435	chr1:32636731-32636771[+]	KPNA6	NM_012316	5673	236-276
CCR3442	chr17:48939677-48939717[-]	TOB1	NM_005749	754	624-664
CCR3443	chrX:9684487-9684527[+]	TBL1X	NM_005647	3494	201-241
CCR3444	chr8:29963582-29963622[+]	LEPROTL1	NM_015344	2209	204-244
CCR3445	chr5:142659463-142659503[-]	NR3C1	NM_000176	3958	1951-1991
CCR3446	chr19:10579169-10579209[+]	PDE4A	NM_006202	2010	872-912
CCR3447	chr5:158585031-158585071[-]	RNF145	NM_144726	1259	607-647
CCR3448	chr2:27171124-27171164[+]	DPYSL5	NM_020134	3356	1261-1301
CCR3449	chr4:7061837-7061877[-]	GRPEL1	NM_025196	809	712-752
CCR3451	chr7:77584888-77584928[+]	PHTF2	NM_020432	2626	693-733
CCR3452	chr19:55602359-55602399[-]	PPP1R12C	NM_017607	559	441-481
CCR3455	chr20:57485836-57485876[+]	GNAS	NM_001077490	1412	998-1038
CCR3455	chr20:57485836-57485876[+]	GNAS	NM_016592	1457	1043-1083
CCR3457	chr5:145667131-145667171[+]	RBM27	NM_018989	3191	1538-1578
CCR3458	chr2:60685678-60685718[-]	BCL11A	NM_022893	3210	1821-1861
CCR3462	chr3:129369708-129369748[-]	TMCC1	NM_001017395	3689	576-616
CCR3463	chr6:44222222-44222262[-]	SLC35B2	NM_178148	605	181-221
CCR3465	chr13:49866649-49866689[+]	CDADC1	NM_030911	1729	756-796
CCR3467	chr12:54628752-54628792[-]	CBX5	NM_012117	10808	6747-6787
CCR3469	chr10:64914155-64914195[+]	NRBF2	NM_030759	808	177-217
CCR3472	chr6:158613241-158613281[+]	GTF2H5	NM_207118	7187	52-92
CCR3475	chr11:64789364-64789404[+]	ARL2	NM_001667	329	37-77
CCR3479	chr22:24936585-24936625[-]	C22orf13	NM_031444	2568	2349-2389
CCR3481	chr3:38294749-38294789[+]	OXSR1	NM_005109	2597	367-407
CCR3483	chr22:21805507-21805547[+]	HIC2	NM_015094	4718	4475-4515
CCR3485	chr19:48968234-48968274[+]	KCNJ14	NM_013348	1333	200-240
CCR3488	chr8:41788682-41788722[-]	KAT6A	NM_006766	2726	1001-1041
CCR3492	chr6:90036818-90036858[-]	UBE2J1	NM_016021	3054	2540-2580
CCR3493	chr12:39687285-39687325[-]	KIF21A	NM_017641	1196	901-941
CCR3494	chr12:104341596-104341636[+]	HSP90B1	NM_003299	263	156-196
CCR3496	chr14:68143948-68143988[-]	RDH11	NM_016026	1519	1050-1090
CCR3499	chr5:154255071-154255111[+]	CNOT8	NM_004779	1353	72-112
CCR3507	chr7:112407121-112407161[-]	TMEM168	NM_022484	1465	91-131
CCR3510	chr15:91425917-91425957[+]	FURIN	NM_002569	1579	809-849
CCR3511	chr6:138744472-138744512[-]	NHSL1	NM_020464	2037	706-746
CCR3512	chr16:4013243-4013283[-]	ADCY9	NM_001116	3126	2493-2533
CCR3513	chr18:46446381-46446421[-]	SMAD7	NM_005904	1519	1321-1361
CCR3519	chr20:31032177-31032217[-]	C20orf112	NM_080616	4537	3182-3222
CCR3527	chr6:20493013-20493053[+]	E2F3	NM_001949	3284	2352-2392
CCR3528	chrX:62569806-62569846[-]	SPIN4	NM_001012968	2842	103-143
CCR3530	chr11:13409981-13410021[-]	BTBD10	NM_032320	822	357-397
CCR3531	chr8:6615428-6615468[+]	AGPAT5	NM_018361	4112	519-559
CCR3532	chr10:112658877-112658917[+]	PDCD4	NM_014456	1918	1031-1071
CCR3535	chr5:167984289-167984329[-]	PANK3	NM_024594	1946	247-287
CCR3537	chr22:41793869-41793909[+]	TEF	NM_003216	3366	1905-1945
CCR3540	chr16:88698164-88698204[+]	ZC3H18	NM_144604	665	457-497
CCR3541	chr12:121136973-121137013[+]	MLEC	NM_014730	5319	2625-2665
CCR3543	chr8:95892996-95893036[-]	CCNE2	NM_057749	1407	824-864
CCR3546	chr9:113006348-113006388[-]	TXN	NM_003329	127	49-89
CCR3547	chr6:11138862-11138902[+]	C6orf228	NM_001135575	4134	4027-4067
CCR3548	chr19:6751435-6751475[+]	TRIP10	NM_004240	307	213-253
CCR3549	chr7:70256171-70256211[+]	AUTS2	NM_001127231	1493	189-229
CCR3549	chr7:70256171-70256211[+]	AUTS2	NM_015570	1903	189-229
CCR3554	chr22:35690354-35690394[+]	HMGXB4	NM_001003681	2156	710-750
CCR3556	chr1:59247082-59247122[-]	JUN	NM_002228	1284	625-665
CCR3558	chr16:46990448-46990488[-]	DNAJA2	NM_005880	1667	453-493
CCR3560	chr1:8073208-8073248[-]	ERRFI1	NM_018948	1491	22-62
CCR3561	chr8:92972117-92972157[-]	RUNX1T1	NM_004349	5275	313-353
CCR3565	chr8:82712719-82712759[-]	SNX16	NM_022133	1914	973-1013
CCR3568	chr8:124261158-124261198[-]	ZHX1	NM_007222	1868	1366-1406
CCR3570	chr5:171636770-171636810[-]	UBTD2	NM_152277	2184	2024-2064
CCR3574	chr21:34896984-34897024[-]	GART	NM_175085	756	48-88
CCR3577	chr15:99506080-99506120[+]	IGF1R	NM_000875	7088	5409-5449
CCR3578	chr6:20492482-20492522[+]	E2F3	NM_001949	3284	1821-1861
CCR3583	chr3:62279181-62279221[+]	PTPRG	NM_002841	1591	199-239
CCR3590	chr17:76102888-76102928[+]	TNRC6C	NM_018996	3990	1962-2002
CCR3591	chr1:162499055-162499095[+]	UHMK1	NM_144624	7215	6851-6891
CCR3591	chr1:162499055-162499095[+]	UHMK1	NM_175866	7079	6715-6755
CCR3592	chr2:152695199-152695239[-]	CACNB4	NM_000726	6347	394-434
CCR3593	chr4:153832869-153832909[+]	ARFIP1	NM_014447	1692	1498-1538
CCR3597	chr11:120959459-120959499[+]	TBCEL	NM_152715	2549	1654-1694
CCR3601	chr17:1423196-1423236[-]	PITPNA	NM_006224	2572	619-659
CCR3603	chr19:1257705-1257745[+]	MIDN	NM_177401	1871	434-474
CCR3605	chr8:110586717-110586757[-]	SYBU	NM_017786	730	378-418
CCR3606	chr17:37687779-37687819[+]	CDK12	NM_015083	3231	210-250
CCR3615	chr2:69693162-69693202[-]	AAK1	NM_014911	17874	9799-9839
CCR3618	chr6:53788004-53788044[+]	LRRC1	NM_018214	1328	413-453
CCR3620	chr3:15296701-15296741[-]	SH3BP5	NM_004844	1236	852-892
CCR3622	chr7:94294219-94294259[+]	PEG10	NM_001040152	5160	373-413
CCR3623	chr7:2768209-2768249[-]	GNA12	NM_007353	3074	2566-2606
CCR3624	chr2:220047667-220047707[+]	FAM134A	NM_024293	2846	316-356
CCR3625	chr3:15085902-15085942[+]	NR2C2	NM_003298	6265	1387-1427
CCR3628	chr21:40568022-40568062[-]	BRWD1	NM_033656	6037	123-163
CCR3632	chr1:214510231-214510271[+]	SMYD2	NM_020197	350	104-144
CCR3633	chr5:68576588-68576628[-]	CCDC125	NM_176816	2037	1928-1968
CCR3634	chr20:49507495-49507535[-]	ADNP	NM_015339	1059	407-447
CCR3635	chr17:28575545-28575585[-]	BLMH	NM_000386	812	450-490
CCR3637	chr21:43407517-43407557[-]	ZNF295	NM_020727	4064	3447-3487
CCR3639	chr6:135357534-135357574[-]	HBS1L	NM_001145207	701	122-162
CCR3642	chr1:67876847-67876887[-]	SERBP1	NM_015640	5397	2003-2043
CCR3643	chr7:92243168-92243208[-]	CDK6	NM_001259	10219	1246-1286
CCR3646	chr12:120899726-120899766[-]	SRSF9	NM_003769	351	56-96
CCR3648	chr17:12894556-12894596[+]	ARHGAP44	NM_014859	1472	1068-1108
CCR3649	chr8:81431839-81431879[+]	ZBTB10	NM_023929	2847	76-116
CCR3651	chr19:46190755-46190795[-]	SNRPD2	NM_004597	99	16-56
CCR3652	chr6:17608965-17609005[+]	FAM8A1	NM_016255	3380	395-435
CCR3653	chr20:57252536-57252576[+]	STX16	NM_003763	3235	1189-1229
CCR3655	chr5:108670411-108670451[-]	PJA2	NM_014819	2522	2481-2521
CCR3658	chr18:57570854-57570894[+]	PMAIP1	NM_021127	1553	869-909
CCR3659	chr17:62495893-62495933[-]	DDX5	NM_004396	1667	108-148
CCR3660	chr17:39847362-39847402[+]	EIF1	NM_005801	820	284-324
CCR3663	chr11:85374492-85374532[-]	CREBZF	NM_001039618	6247	323-363
CCR3664	chr17:48770710-48770750[-]	ANKRD40	NM_052855	2807	2608-2648
CCR3665	chr5:179728328-179728368[-]	GFPT2	NM_005110	864	196-236
CCR3666	chrX:38665280-38665320[+]	MID1IP1	NM_021242	1032	529-569
CCR3674	chr12:8249846-8249886[+]	NECAP1	NM_015509	1687	1160-1200
CCR3681	chrX:133905257-133905297[-]	FAM122B	NM_001166600	1719	18-58
CCR3681	chrX:133905257-133905297[-]	FAM122B	NM_145284	2573	872-912
CCR3683	chr19:58005772-58005812[+]	ZNF419	NM_024691	590	314-354
CCR3684	chr7:26252885-26252925[+]	CBX3	NM_007276	1148	1057-1097
CCR3685	chr5:78620352-78620392[+]	JMY	NM_152405	5613	2927-2967
CCR3687	chr22:37406984-37407024[-]	TST	NM_003312	162	44-84
CCR3690	chr15:66783598-66783638[+]	MAP2K1	NM_002755	929	645-685
CCR3692	chr2:133430337-133430377[-]	NCKAP5	NM_207363	1490	485-525
CCR3693	chr18:29653108-29653148[+]	RNF125	NM_017831	4807	4761-4801
CCR3694	chr8:66631031-66631071[-]	PDE7A	NM_002603	1620	454-494
CCR3697	chr8:68110211-68110251[-]	ARFGEF1	NM_006421	1272	918-958
CCR3698	chr6:15521609-15521649[+]	JARID2	NM_004973	1771	1127-1167
CCR3700	chr13:111164831-111164871[+]	COL4A2	NM_001846	835	293-333
CCR3707	chr20:16722265-16722305[+]	SNRPB2	NM_003092	767	615-655
CCR3708	chr18:57571284-57571324[+]	PMAIP1	NM_021127	1553	1299-1339
CCR3712	chr9:89560153-89560193[-]	GAS1	NM_002048	1380	464-504
CCR3724	chr10:121334916-121334956[-]	TIAL1	NM_003252	2199	221-261
CCR3728	chr22:21805392-21805432[+]	HIC2	NM_015094	4718	4360-4400
CCR3731	chr12:12273899-12273939[-]	LRP6	NM_002336	5099	121-161
CCR3736	chr7:44866763-44866803[-]	H2AFV	NM_138635	3255	2940-2980
CCR3744	chr1:26449114-26449154[+]	PDIK1L	NM_152835	2958	46-86
CCR3745	chr1:151313658-151313698[-]	RFX5	NM_000449	1546	964-1004
CCR3746	chr6:135286045-135286085[-]	HBS1L	NM_006620	4900	332-372
CCR3747	chr4:139085404-139085444[-]	SLC7A11	NM_014331	7862	7666-7706
CCR3755	chr14:100744121-100744161[+]	YY1	NM_003403	867	184-224
CCR3756	chr8:30536690-30536730[-]	GSR	NM_000637	1457	307-347
CCR3757	chr1:113243159-113243199[+]	MOV10	NM_020963	239	30-70
CCR3758	chr17:8076739-8076779[-]	TMEM107	NM_032354	1224	742-782
CCR3763	chr10:6158145-6158185[+]	RBM17	NM_032905	1903	626-666
CCR3765	chr22:24936408-24936448[-]	C22orf13	NM_031444	2568	2526-2566
CCR3766	chr2:70167299-70167339[+]	MXD1	NM_002357	4660	1883-1923
CCR3770	chr2:27423173-27423213[-]	SLC5A6	NM_021095	849	91-131
CCR3772	chr20:21370132-21370172[+]	XRN2	NM_012255	487	156-196
CCR3773	chr8:28610328-28610368[+]	EXTL3	NM_001440	2819	1945-1985
CCR3776	chr5:56218481-56218521[-]	MIER3	NM_152622	3526	434-474
CCR3778	chr8:86196021-86196061[+]	CA13	NM_198584	2724	2443-2483
CCR3785	chr10:73993533-73993573[+]	ANAPC16	NM_173473	2744	659-699
CCR3786	chr10:16553541-16553581[+]	PTER	NM_030664	2481	286-326
CCR3791	chr2:187374020-187374060[+]	ZC3H15	NM_018471	627	560-600
CCR3792	chr9:132897914-132897954[+]	GPR107	NM_020960	5048	514-554
CCR3793	chr2:27845008-27845048[+]	ZNF512	NM_032434	1635	680-720
CCR3794	chr18:60245335-60245375[+]	ZCCHC2	NM_017742	2006	1523-1563
CCR3795	chr10:27036365-27036405[-]	ABI1	NM_005470	1974	1094-1134
CCR3796	chr6:13622068-13622108[-]	RANBP9	NM_005493	864	486-526
CCR3799	chr14:96751593-96751633[-]	ATG2B	NM_018036	4497	459-499
CCR3800	chr6:36569950-36569990[+]	SRSF3	NM_003017	2478	184-224
CCR3801	chr6:16304091-16304131[-]	ATXN1	NM_000332	7217	2429-2469
CCR3803	chr3:167727974-167728014[-]	GOLIM4	NM_014498	403	43-83
CCR3806	chr8:103661928-103661968[-]	KLF10	NM_005655	1355	392-432
CCR3809	chr12:56704254-56704294[-]	CNPY2	NM_014255	123	42-82
CCR3813	chr13:77580556-77580596[-]	FBXL3	NM_012158	1891	684-724
CCR3814	chrX:49857637-49857677[+]	CLCN5	NM_000084	7016	761-801
CCR3817	chr3:127788644-127788684[+]	SEC61A1	NM_013336	2021	139-179
CCR3818	chr2:74441613-74441653[+]	MTHFD2	NM_006636	1055	244-284
CCR3819	chr1:6683929-6683969[+]	PHF13	NM_153812	2396	2232-2272
CCR3820	chr21:38886163-38886203[+]	DYRK1A	NM_001396	2845	1329-1369
CCR3820	chr21:38886163-38886203[+]	DYRK1A	NM_101395	3513	1997-2037
CCR3820	chr21:38886163-38886203[+]	DYRK1A	NM_130438	3422	1906-1946
CCR3823	chr11:47491555-47491595[-]	CELF1	NM_001172639	4992	886-926
CCR3823	chr11:47491555-47491595[-]	CELF1	NM_001172640	6205	2099-2139
CCR3825	chr11:61214135-61214175[+]	SDHAF2	NM_017841	696	592-632
CCR3828	chr4:77036441-77036481[-]	NUP54	NM_017426	702	38-78
CCR3831	chr14:105477206-105477246[-]	CDCA4	NM_017955	1631	295-335
CCR3832	chr8:126450193-126450233[+]	TRIB1	NM_025195	1931	1480-1520
CCR3834	chr2:68407942-68407982[-]	PPP3R1	NM_000945	2106	113-153
CCR3838	chr2:69693626-69693666[-]	AAK1	NM_014911	17874	9335-9375
CCR3843	chr12:12874214-12874254[+]	CDKN1B	NM_004064	1344	253-293
CCR3844	chr12:54383637-54383677[+]	HOXC10	NM_017409	832	407-447
CCR3845	chr12:56634880-56634920[-]	ANKRD52	NM_173595	5335	2006-2046
CCR3850	chr3:151152634-151152674[+]	MED12L	NM_053002	3873	2042-2082
CCR3854	chr10:98280779-98280819[-]	TM9SF3	NM_020123	4153	1201-1241
CCR3857	chr1:2239210-2239250[+]	SKI	NM_003036	3448	1006-1046
CCR3860	chr18:19447091-19447131[+]	MIB1	NM_020774	6285	2464-2504
CCR3861	chr11:57583826-57583866[+]	CTNND1	NM_001331	2872	46-86
CCR3863	chr5:74017413-74017453[-]	GFM2	NM_032380	449	27-67
CCR3864	chr5:142660709-142660749[-]	NR3C1	NM_000176	3958	705-745
CCR3866	chr17:27587045-27587085[-]	NUFIP2	NM_020772	8703	4472-4512
CCR3869	chr1:244218759-244218799[+]	ZNF238	NM_006352	2106	87-127
CCR3871	chr6:16148432-16148472[+]	MYLIP	NM_013262	1496	1450-1490
CCR3872	chr22:28377479-28377519[-]	TTC28	NM_001145418	4207	690-730
CCR3877	chr12:69972310-69972350[+]	FRS2	NM_006654	4827	3575-3615
CCR3880	chr2:206660246-206660286[+]	NRP2	NM_003872	3075	464-504
CCR3889	chr17:77756118-77756158[+]	CBX2	NM_032647	383	170-210
CCR3890	chr10:74092673-74092713[-]	DNAJB12	NM_001002762	2980	2855-2895
CCR3890	chr10:74092673-74092713[-]	DNAJB12	NM_017626	1818	1693-1733
CCR3894	chr6:149982112-149982152[-]	LATS1	NM_004690	814	713-753
CCR3900	chr10:98723744-98723784[+]	LCOR	NM_001170766	6023	5569-5609
CCR3900	chr10:98723744-98723784[+]	LCOR	NM_032440	8519	8065-8105
CCR3902	chr17:45198104-45198144[-]	CDC27	NM_001256	2990	157-197
CCR3903	chr1:114518026-114518066[+]	HIPK1	NM_181358	4288	1892-1932
CCR3908	chr3:135869791-135869831[-]	MSL2	NM_018133	2229	158-198
CCR3909	chr12:21669673-21669713[+]	GOLT1B	NM_016072	2696	1032-1072
CCR3915	chr3:24019108-24019148[+]	NR1D2	NM_005126	3199	198-238
CCR3916	chr13:73283244-73283284[-]	MZT1	NM_001071775	1965	1176-1216
CCR3918	chr19:10796337-10796377[+]	ILF3	NM_004516	1302	1196-1236
CCR3918	chr19:10796337-10796377[+]	ILF3	NM_153464	895	789-829
CCR3919	chr9:111782133-111782173[-]	TMEM245	NM_032012	5325	567-607
CCR3920	chr19:58488515-58488555[-]	ZNF606	NM_025027	1228	1114-1154
CCR3922	chr17:28853744-28853784[+]	GOSR1	NM_004871	4436	4348-4388
CCR3929	chr5:32355521-32355561[-]	ZFR	NM_016107	1410	305-345
CCR3930	chr20:49577107-49577147[+]	MOCS3	NM_014484	1058	345-385
CCR3931	chr4:99799992-99800032[-]	EIF4E	NM_001968	2572	2147-2187
CCR3932	chr16:69154264-69154304[-]	CHTF8	NM_001039690	2416	24-64
CCR3944	chr10:124924805-124924845[+]	BUB3	NM_001007793	314	233-273
CCR3944	chr10:124924805-124924845[+]	BUB3	NM_004725	1535	1454-1494
CCR3947	chr1:230972885-230972925[-]	C1orf198	NM_032800	2733	2673-2713
CCR3951	chr11:9610949-9610989[+]	WEE1	NM_003390	1164	800-840
CCR3954	chr15:73596003-73596043[+]	NEO1	NM_002499	2510	966-1006
CCR3956	chr5:133291587-133291627[-]	C5orf15	NM_020199	1352	923-963
CCR3957	chr4:79841475-79841515[-]	PAQR3	NM_001040202	2599	178-218
CCR3960	chr1:175129600-175129640[-]	KIAA0040	NM_014656	3727	210-250
CCR3961	chr2:30863644-30863684[+]	LCLAT1	NM_182551	3606	159-199
CCR3966	chr17:38435706-38435746[+]	WIPF2	NM_133264	3962	1229-1269
CCR3967	chr2:203426190-203426230[+]	BMPR2	NM_001204	7805	1521-1561
CCR3969	chr19:45593773-45593813[+]	GEMIN7	NM_024707	1014	5-45
CCR3977	chr8:57073565-57073605[-]	PLAG1	NM_002655	5334	5197-5237
CCR3980	chr1:234742834-234742874[-]	IRF2BP2	NM_182972	2868	9-49
CCR3982	chr12:115109117-115109157[-]	TBX3	NM_005996	1587	489-529
CCR3983	chr6:105528839-105528879[+]	LIN28B	NM_001004317	4548	2181-2221
CCR3987	chr7:129658157-129658197[-]	ZC3HC1	NM_016478	378	307-347
CCR3988	chr21:35474826-35474866[+]	SLC5A3	NM_006933	8907	5172-5212
CCR3990	chr9:33111450-33111490[-]	B4GALT1	NM_001497	2813	1962-2002
CCR3993	chr11:82692563-82692603[-]	RAB30	NM_014488	729	604-644
CCR3994	chr2:160087396-160087436[+]	TANC1	NM_001145909	3041	1267-1307
CCR3995	chr2:64861118-64861158[-]	SERTAD2	NM_014755	4306	1903-1943
CCR3996	chr14:53244843-53244883[-]	GNPNAT1	NM_198066	3118	146-186
CCR3997	chr20:61827011-61827051[-]	YTHDF1	NM_017798	1278	1009-1049
CCR4003	chr10:112364126-112364166[+]	SMC3	NM_005445	332	66-106
CCR4010	chr22:37886972-37887012[-]	CARD10	NM_014550	797	185-225
CCR4012	chr12:120878470-120878510[+]	COX6A1	NM_004373	189	130-170
CCR4015	chrX:44971211-44971251[+]	KDM6A	NM_021140	1189	555-595
CCR4017	chr5:110463390-110463430[+]	WDR36	NM_139281	3619	809-849
CCR4020	chr14:75598515-75598555[-]	TMED10	NM_006827	3417	3033-3073
CCR4024	chr9:133762600-133762640[+]	ABL1	NM_005157	1988	1530-1570
CCR4024	chr9:133762600-133762640[+]	ABL1	NM_007313	1992	1530-1570
CCR4030	chr5:177022563-177022603[+]	TMED9	NM_017510	682	146-186
CCR4031	chr1:68941326-68941366[-]	DEPDC1	NM_017779	2780	1249-1289
CCR4033	chr6:143073599-143073639[-]	HIVEP2	NM_006734	1640	605-645
CCR4036	chr7:27147272-27147312[-]	HOXA3	NM_030661	1725	222-262
CCR4040	chr5:82351942-82351982[-]	TMEM167A	NM_174909	4238	921-961
CCR4041	chr11:14526656-14526696[-]	PSMA1	NM_002786	316	42-82
CCR4043	chr12:56145280-56145320[+]	GDF11	NM_005811	2999	1614-1654
CCR4045	chr19:42799608-42799648[+]	CIC	NM_015125	606	265-305
CCR4048	chr1:116236276-116236316[+]	VANGL1	NM_138959	6845	2276-2316
CCR4052	chr1:38278971-38279011[-]	MTF1	NM_005955	5569	1797-1837
CCR4055	chr7:36365103-36365143[-]	KIAA0895	NM_015314	2610	1226-1266
CCR4059	chr7:156797656-156797696[-]	MNX1	NM_005515	667	518-558
CCR4060	chr17:57684992-57685032[+]	DHX40	NM_024612	1180	459-499
CCR4065	chr15:55911690-55911730[-]	PRTG	NM_173814	8471	480-520
CCR4066	chr3:196312266-196312306[+]	FBXO45	NM_001105573	4741	1077-1117
CCR4070	chr4:139088950-139088990[-]	SLC7A11	NM_014331	7862	4120-4160
CCR4071	chr14:80330416-80330456[+]	NRXN3	NM_004796	2453	2109-2149
CCR4073	chr17:5336210-5336250[-]	C1QBP	NM_001212	236	85-125
CCR4074	chr19:16991107-16991147[+]	SIN3B	NM_015260	1626	1569-1609
CCR4075	chr17:17747076-17747116[-]	TOM1L2	NM_001033551	4127	3833-3873
CCR4078	chr13:42895007-42895047[+]	AKAP11	NM_016248	4038	1643-1683
CCR4081	chr5:180004878-180004918[+]	CNOT6	NM_015455	4153	3678-3718
CCR4086	chr12:104345225-104345265[-]	C12orf73	NM_001135570	1320	36-76
CCR4087	chr12:62799345-62799385[+]	USP15	NM_006313	1743	1190-1230
CCR4090	chr2:8996988-8997028[-]	MBOAT2	NM_138799	2108	1781-1821
CCR4091	chr8:21863201-21863241[+]	XPO7	NM_015024	1497	602-642
CCR4093	chr1:207221698-207221738[-]	YOD1	NM_018566	5171	627-667
CCR4096	chr13:108883802-108883842[+]	ABHD13	NM_032859	4023	1222-1262
CCR4097	chr12:109887120-109887160[-]	KCTD10	NM_031954	2940	2240-2280
CCR4100	chr7:131812857-131812897[-]	PLXNA4	NM_020911	7147	2341-2381
CCR4104	chr3:53320255-53320295[-]	DCP1A	NM_018403	4153	1303-1343
CCR4106	chr3:140696072-140696112[+]	SLC25A36	NM_018155	3490	777-817
CCR4110	chr15:98516849-98516889[+]	ARRDC4	NM_183376	2651	2432-2472
CCR4111	chr7:44921248-44921288[-]	PURB	NM_033224	8117	2721-2761
CCR4116	chr5:137087712-137087752[-]	HNRNPA0	NM_006805	1765	1086-1126
CCR4119	chr15:32931136-32931176[+]	ARHGAP11A	NM_014783	1822	1090-1130
CCR4122	chr16:69342349-69342389[+]	SNTB2	NM_006750	8128	7522-7562
CCR4124	chr9:104325133-104325173[+]	RNF20	NM_019592	922	429-469
CCR4126	chr8:11181151-11181191[+]	MTMR9	NM_015458	5357	854-894
CCR4128	chr19:58724786-58724826[+]	ZNF274	NM_016324	418	277-317
CCR4129	chr1:218510144-218510184[+]	RRP15	NM_016052	6892	5711-5751
CCR4130	chr8:103265917-103265957[-]	UBR5	NM_015902	961	573-613
CCR4131	chr11:64532091-64532131[-]	SF1	NM_004630	1214	1159-1199
CCR4131	chr11:64532091-64532131[-]	SF1	NM_201995	785	730-770
CCR4131	chr11:64532091-64532131[-]	SF1	NM_201998	850	795-835
CCR4133	chr13:45969444-45969484[-]	SLC25A30	NM_001010875	2655	625-665
CCR4134	chrX:24002862-24002902[-]	KLHL15	NM_030624	4205	3136-3176
CCR4136	chr6:4116003-4116043[-]	ECI2	NM_006117	181	65-105
CCR4138	chr4:533236-533276[+]	PIGG	NM_017733	162	78-118
CCR4140	chr18:32915866-32915906[-]	ZNF24	NM_006965	5018	1290-1330
CCR4141	chr3:101313141-101313181[+]	PCNP	NM_020357	1684	1544-1584
CCR4142	chr2:172180225-172180265[-]	METTL8	NM_024770	6769	417-457
CCR4143	chr13:75858880-75858920[-]	TBC1D4	NM_014832	2119	2008-2048
CCR4144	chr12:76747304-76747344[-]	OSBPL8	NM_020841	4091	2325-2365
CCR4149	chr6:170104653-170104693[+]	C6orf120	NM_001029863	3271	1522-1562
CCR4150	chr4:174244748-174244788[+]	GALNT7	NM_017423	2250	1880-1920
CCR4151	chr10:35500486-35500526[+]	CREM	NM_182717	1560	160-200
CCR4155	chr11:94696486-94696526[-]	CWC15	NM_016403	763	24-64
CCR4157	chrX:119572597-119572637[-]	LAMP2	NM_013995	2660	372-412
CCR4158	chr17:27587249-27587289[-]	NUFIP2	NM_020772	8703	4268-4308
CCR4159	chr1:156046105-156046145[-]	MEX3A	NM_001093725	4561	220-260
CCR4166	chr5:154255529-154255569[+]	CNOT8	NM_004779	1353	530-570
CCR4168	chr11:117038788-117038828[+]	PAFAH1B2	NM_002572	3346	373-413
CCR4170	chr1:150192835-150192875[-]	ANP32E	NM_030920	2276	118-158
CCR4171	chr16:89629587-89629627[+]	RPL13	NM_000977	398	137-177
CCR4175	chr14:75598694-75598734[-]	TMED10	NM_006827	3417	2854-2894
CCR4178	chr15:59956056-59956096[-]	BNIP2	NM_004330	1206	172-212
CCR4179	chr11:66413688-66413728[+]	RBM4	NM_001198843	427	171-211
CCR4179	chr11:66413688-66413728[+]	RBM4	NM_002896	455	199-239
CCR4180	chr1:245016185-245016225[-]	HNRNPU	NM_004501	4150	1527-1567
CCR4183	chr7:21552803-21552843[+]	SP4	NM_003112	3264	1916-1956
CCR4185	chr5:52386919-52386959[+]	ITGA2	NM_002203	4180	490-530
CCR4186	chr4:42113269-42113309[-]	BEND4	NM_001159547	6873	6434-6474
CCR4186	chr4:42113269-42113309[-]	BEND4	NM_207406	6665	6226-6266
CCR4188	chr22:41368550-41368590[+]	RBX1	NM_014248	527	58-98
CCR4190	chr1:9674335-9674375[+]	TMEM201	NM_001130924	1794	1194-1234
CCR4196	chr22:32078319-32078359[-]	PRR14L	NM_173566	4179	3154-3194
CCR4197	chr7:138989234-138989274[+]	UBN2	NM_173569	10400	6652-6692
CCR4198	chr22:21304144-21304184[+]	CRKL	NM_005207	3904	11-51
CCR4201	chrX:131761146-131761186[-]	HS6ST2	NM_147175	2213	1065-1105
CCR4202	chr17:42881468-42881508[-]	GJC1	NM_005497	6179	487-527
CCR4205	chr5:90666362-90666402[-]	ARRDC3	NM_020801	2676	815-855
CCR4206	chr1:155305207-155305247[-]	ASH1L	NM_018489	2399	2204-2244
CCR4212	chr3:57304930-57304970[+]	APPL1	NM_012096	3783	1215-1255
CCR4213	chr3:38525011-38525051[+]	ACVR2B	NM_001106	9810	188-228
CCR4215	chr9:14083366-14083406[-]	NFIB	NM_005596	6466	4902-4942
CCR4216	chr5:179728289-179728329[-]	GFPT2	NM_005110	864	235-275
CCR4219	chr2:235962895-235962935[+]	SH3BP4	NM_014521	1898	435-475
CCR4221	chr12:69663324-69663364[+]	CPSF6	NM_007007	4850	36-76
CCR4222	chr15:63617955-63617995[-]	CA12	NM_001218	2754	489-529
CCR4226	chr5:175954517-175954557[-]	RNF44	NM_014901	2329	1472-1512
CCR4231	chr1:89318809-89318849[-]	GTF2B	NM_001514	575	47-87
CCR4233	chr1:32663433-32663473[+]	TXLNA	NM_175852	3090	2637-2677
CCR4234	chr12:69971588-69971628[+]	FRS2	NM_006654	4827	2853-2893
CCR4235	chr5:173386001-173386041[+]	CPEB4	NM_030627	4173	2861-2901
CCR4240	chr7:157061689-157061729[+]	UBE3C	NM_014671	1617	1240-1280
CCR4250	chr19:46273226-46273266[-]	DMPK	NM_001081562	763	473-513
CCR4250	chr19:46273226-46273266[-]	DMPK	NM_004409	770	480-520
CCR4251	chr4:1814261-1814301[-]	LETM1	NM_012318	2945	1850-1890
CCR4252	chr12:30862559-30862599[-]	CAPRIN2	NM_023925	350	237-277
CCR4256	chr14:50361010-50361050[+]	ARF6	NM_001663	2790	28-68
CCR4258	chr11:61171208-61171248[-]	CPSF7	NM_024811	2062	934-974
CCR4259	chr5:32354669-32354709[-]	ZFR	NM_016107	1410	1157-1197
CCR4260	chr6:7251129-7251169[+]	RREB1	NM_001003698	3012	1928-1968
CCR4261	chr11:18628891-18628931[-]	SPTY2D1	NM_194285	3460	2477-2517
CCR4266	chr19:42702767-42702807[-]	DEDD2	NM_133328	838	783-823
CCR4269	chrX:73808973-73809013[-]	RLIM	NM_016120	8464	2262-2302
CCR4272	chr9:73000331-73000371[-]	KLF9	NM_001206	3179	2321-2361
CCR4273	chr1:160395269-160395309[+]	VANGL2	NM_020335	3300	101-141
CCR4274	chr1:207221591-207221631[-]	YOD1	NM_018566	5171	734-774
CCR4279	chr19:53914202-53914242[+]	ZNF765	NM_001040185	2882	1822-1862
CCR4280	chr7:151832529-151832569[-]	MLL3	NM_170606	1907	1348-1388
CCR4282	chr4:76406974-76407014[-]	RCHY1	NM_001008925	3582	915-955
CCR4282	chr4:76406974-76407014[-]	RCHY1	NM_015436	3401	734-774
CCR4283	chr20:52184744-52184784[-]	ZNF217	NM_006526	2217	1043-1083
CCR4284	chr2:153616674-153616714[+]	ARL6IP6	NM_152522	1413	320-360
CCR4286	chr2:24222957-24222997[+]	UBXN2A	NM_181713	956	220-260
CCR4288	chr6:153291661-153291701[-]	FBXO5	NM_012177	640	597-637
CCR4293	chr22:32014605-32014645[-]	PISD	NM_014338	1121	953-993
CCR4294	chr17:47006369-47006409[+]	UBE2Z	NM_023079	1926	1873-1913
CCR4295	chr6:46113740-46113780[+]	ENPP4	NM_014936	3059	2363-2403
CCR4300	chr8:22477854-22477894[+]	KIAA1967	NM_021174	788	659-699
CCR4303	chr17:48940108-48940148[-]	TOB1	NM_005749	754	193-233
CCR4304	chr1:15756558-15756598[+]	EFHD2	NM_024329	1619	1338-1378
CCR4306	chr6:105725749-105725789[-]	PREP	NM_002726	577	230-270
CCR4313	chr5:115167097-115167137[-]	ATG12	NM_004707	3607	364-404
CCR4316	chr1:162492960-162493000[+]	UHMK1	NM_144624	7215	756-796
CCR4316	chr1:162492960-162493000[+]	UHMK1	NM_175866	7079	620-660
CCR4318	chr10:14561235-14561275[-]	FAM107B	NM_031453	2630	1914-1954
CCR4321	chr2:198416372-198416412[+]	MOB4	NM_015387	2145	1002-1042
CCR4323	chr2:55199360-55199400[-]	RTN4	NM_007008	965	892-932
CCR4327	chr17:56050077-56050117[-]	VEZF1	NM_007146	2924	1717-1757
CCR4329	chr19:33871833-33871873[+]	CEBPG	NM_001806	2994	1235-1275
CCR4331	chr5:82351180-82351220[-]	TMEM167A	NM_174909	4238	1683-1723
CCR4332	chr2:64819828-64819868[+]	AFTPH	NM_017657	969	659-699
CCR4336	chr19:2273145-2273185[+]	OAZ1	NM_004152	380	38-78
CCR4339	chr3:88206117-88206157[+]	C3orf38	NM_173824	1330	332-372
CCR4340	chr15:45899391-45899431[+]	PLDN	NM_012388	3197	679-719
CCR4343	chr4:57799116-57799156[+]	REST	NM_005612	3692	798-838
CCR4346	chr11:102267396-102267436[-]	TMEM123	NM_052932	2542	2162-2202
CCR4347	chr22:19121062-19121102[-]	DGCR14	NM_022719	3917	607-647
CCR4351	chr18:60794348-60794388[-]	BCL2	NM_000633	5279	1470-1510
CCR4354	chr21:38885179-38885219[+]	DYRK1A	NM_001396	2845	345-385
CCR4354	chr21:38885179-38885219[+]	DYRK1A	NM_101395	3513	1013-1053
CCR4354	chr21:38885179-38885219[+]	DYRK1A	NM_130438	3422	922-962
CCR4356	chr19:58083308-58083348[-]	ZNF416	NM_017879	553	139-179
CCR4358	chr1:92147360-92147400[-]	TGFBR3	NM_003243	3396	1896-1936
CCR4364	chr3:24021406-24021446[+]	NR1D2	NM_005126	3199	2496-2536
CCR4365	chr14:67805173-67805213[-]	ATP6V1D	NM_015994	757	125-165
CCR4367	chr6:158932129-158932169[+]	TULP4	NM_001007466	5224	4497-4537
CCR4367	chr6:158932129-158932169[+]	TULP4	NM_020245	5130	4403-4443
CCR4371	chr19:41248290-41248330[-]	C19orf54	NM_198476	1577	8-48
CCR4374	chr14:53102089-53102129[+]	GPR137C	NM_001099652	2598	256-296
CCR4379	chr11:85372486-85372526[-]	CREBZF	NM_001039618	6247	2329-2369
CCR4381	chr1:101447183-101447223[+]	SLC30A7	NM_001144884	6582	6454-6494
CCR4381	chr1:101447183-101447223[+]	SLC30A7	NM_133496	6898	6770-6810
CCR4382	chr9:34398294-34398334[-]	FAM219A	NM_147202	2780	2628-2668
CCR4389	chr12:133635929-133635969[+]	ZNF84	NM_003428	4367	411-451
CCR4390	chrX:133562776-133562816[+]	PHF6	NM_001015877	3132	3086-3126
CCR4390	chrX:133562776-133562816[+]	PHF6	NM_032458	3462	3416-3456
CCR4391	chr1:202102581-202102621[-]	ARL8A	NM_138795	1618	974-1014
CCR4392	chr8:91637664-91637704[-]	TMEM64	NM_001008495	3676	195-235
CCR4394	chr7:55499025-55499065[+]	LANCL2	NM_018697	2422	12-52
CCR4396	chr15:99502079-99502119[+]	IGF1R	NM_000875	7088	1408-1448
CCR4397	chr19:58419292-58419332[-]	ZNF417	NM_152475	2776	586-626
CCR4398	chr3:24019615-24019655[+]	NR1D2	NM_005126	3199	705-745
CCR4399	chr4:40425929-40425969[-]	RBM47	NM_019027	2649	1952-1992
CCR4400	chr14:67852876-67852916[+]	EIF2S1	NM_004094	3076	2719-2759
CCR4403	chr20:23335210-23335250[+]	NXT1	NM_013248	307	109-149
CCR4406	chr7:95214884-95214924[-]	PDK4	NM_002612	2144	29-69
CCR4407	chr10:95288421-95288461[+]	CEP55	NM_018131	939	511-551
CCR4412	chr12:27952823-27952863[+]	KLHDC5	NM_020782	4874	1724-1764
CCR4420	chr1:115247684-115247724[-]	NRAS	NM_002524	3637	2991-3031
CCR4421	chr7:44841324-44841364[+]	PPIA	NM_021130	1695	303-343
CCR4424	chr13:31233563-31233603[+]	USPL1	NM_005800	193	70-110
CCR4427	chr1:23636400-23636440[-]	HNRNPR	NM_005826	671	507-547
CCR4428	chr19:57804478-57804518[+]	ZNF460	NM_006635	1838	880-920
CCR4430	chr8:6614963-6615003[+]	AGPAT5	NM_018361	4112	54-94
CCR4432	chr14:97031729-97031769[+]	PAPOLA	NM_032632	2061	342-382
CCR4434	chr5:64885897-64885937[-]	TRIM23	NM_001656	2089	1659-1699
CCR4434	chr5:64885897-64885937[-]	TRIM23	NM_033227	619	189-229
CCR4434	chr5:64885897-64885937[-]	TRIM23	NM_033228	659	229-269
CCR4440	chr3:128532887-128532927[+]	RAB7A	NM_004637	1376	622-662
CCR4441	chr3:40530011-40530051[+]	ZNF619	NM_001145082	1996	279-319
CCR4441	chr3:40530011-40530051[+]	ZNF619	NM_001145083	337	279-319
CCR4442	chr1:229795387-229795427[+]	URB2	NM_014777	902	343-383
CCR4448	chr3:124947720-124947760[-]	ZNF148	NM_021964	6672	3425-3465
CCR4453	chr5:114461606-114461646[-]	TRIM36	NM_018700	1741	554-594
CCR4458	chr7:23351405-23351445[-]	IGF2BP3	NM_006547	2153	536-576
CCR4459	chr1:179064968-179065008[+]	TOR3A	NM_022371	776	615-655
CCR4460	chr7:87835636-87835676[-]	SRI	NM_003130	1361	117-157
CCR4462	chr7:155100982-155101022[+]	INSIG1	NM_005542	1965	1002-1042
CCR4462	chr7:155100982-155101022[+]	INSIG1	NM_198336	1877	914-954
CCR4462	chr7:155100982-155101022[+]	INSIG1	NM_198337	2012	1049-1089
CCR4464	chr12:77417272-77417312[-]	E2F7	NM_203394	2769	483-523
CCR4482	chr10:111893377-111893417[+]	ADD3	NM_001121	1947	1-41
CCR4484	chr17:38544990-38545030[-]	TOP2A	NM_001067	998	741-781
CCR4486	chr5:40715183-40715223[-]	TTC33	NM_012382	4569	1024-1064
CCR4488	chr1:16266621-16266661[+]	SPEN	NM_015001	1028	699-739
CCR4490	chr16:72818626-72818666[-]	ZFHX3	NM_006885	4277	2397-2437
CCR4491	chr1:23411495-23411535[-]	LUZP1	NM_033631	4872	3853-3893
CCR4493	chr1:23833625-23833665[-]	E2F2	NM_004091	3450	2707-2747
CCR4498	chr9:22004973-22005013[-]	CDKN2B	NM_004936	3084	973-1013
CCR4498	chr9:22004973-22005013[-]	CDKN2B	NM_078487	3387	1276-1316
CCR4499	chr15:74924650-74924690[-]	EDC3	NM_025083	2054	263-303
CCR4500	chr20:31025144-31025184[+]	ASXL1	NM_015338	1981	3-43
CCR4504	chr2:26618434-26618474[+]	EPT1	NM_033505	6788	6463-6503
CCR4506	chr1:71529544-71529584[-]	ZRANB2	NM_005455	1888	1278-1318
CCR4506	chr1:71529544-71529584[-]	ZRANB2	NM_203350	1783	1173-1213
CCR4508	chr1:162498384-162498424[+]	UHMK1	NM_144624	7215	6180-6220
CCR4508	chr1:162498384-162498424[+]	UHMK1	NM_175866	7079	6044-6084
CCR4514	chr20:34237924-34237964[-]	RBM12	NM_006047	3599	2482-2522
CCR4516	chr15:23048682-23048722[-]	NIPA1	NM_144599	5550	107-147
CCR4517	chr2:131809784-131809824[-]	FAM168B	NM_001009993	4589	214-254
CCR4519	chr14:91924696-91924736[-]	SMEK1	NM_032560	1147	367-407
CCR4520	chr6:126299392-126299432[+]	HINT3	NM_138571	2567	570-610
CCR4521	chr9:23692303-23692343[-]	ELAVL2	NM_004432	2452	212-252
CCR4523	chr3:135869827-135869867[-]	MSL2	NM_018133	2229	122-162
CCR4525	chr6:108365258-108365298[-]	OSTM1	NM_014028	3376	691-731
CCR4535	chr2:32446644-32446684[+]	SLC30A6	NM_017964	3399	862-902
CCR4539	chr1:36386183-36386223[+]	EIF2C1	NM_012199	4691	975-1015
CCR4542	chr8:59494918-59494958[+]	SDCBP	NM_005625	1120	619-659
CCR4543	chr2:20450923-20450963[-]	PUM2	NM_015317	2893	383-423
CCR4545	chr6:36822679-36822719[-]	PPIL1	NM_016059	983	870-910
CCR4552	chr4:184938754-184938794[+]	STOX2	NM_020225	438	317-357
CCR4554	chrX:24567861-24567901[+]	PDK3	NM_001142386	11302	10580-10620
CCR4557	chr18:56415829-56415869[+]	MALT1	NM_006785	2296	755-795
CCR4564	chr12:104742551-104742591[+]	TXNRD1	NM_003330	1863	352-392
CCR4566	chr14:24708346-24708386[+]	GMPR2	NM_016576	463	362-402
CCR4567	chr22:22114232-22114272[-]	MAPK1	NM_002745	4592	4267-4307
CCR4572	chr12:53805945-53805985[+]	SP1	NM_003109	5202	921-961
CCR4573	chr7:27194207-27194247[-]	HOXA7	NM_006896	1190	281-321
CCR4574	chr7:28865460-28865500[+]	CREB5	NM_004904	6615	6564-6604
CCR4579	chr1:202992712-202992752[+]	TMEM183A	NM_138391	1029	544-584
CCR4582	chr12:25358504-25358544[-]	KRAS	NM_004985	4549	4185-4225
CCR4582	chr12:25358504-25358544[-]	KRAS	NM_033360	4670	4306-4346
CCR4583	chr12:77415114-77415154[-]	E2F7	NM_203394	2769	2641-2681
CCR4585	chr19:16345662-16345702[+]	AP1M1	NM_032493	910	416-456
CCR4587	chr2:69552762-69552802[-]	GFPT1	NM_002056	6416	519-559
CCR4590	chr1:27107805-27107845[+]	ARID1A	NM_006015	1354	558-598
CCR4594	chr5:32602541-32602581[+]	SUB1	NM_006713	2995	1351-1391
CCR4596	chr4:56899201-56899241[+]	CEP135	NM_025009	2013	1687-1727
CCR4597	chr10:105357476-105357516[-]	SH3PXD2A	NM_014631	7789	4057-4097
CCR4599	chr2:196601098-196601138[+]	SLC39A10	NM_020342	2661	1333-1373
CCR4600	chr13:49055546-49055586[+]	RB1	NM_000321	1819	1339-1379
CCR4602	chr1:16786323-16786363[+]	NECAP2	NM_001145277	1093	832-872
CCR4602	chr1:16786323-16786363[+]	NECAP2	NM_018090	1199	938-978
CCR4603	chrX:23804284-23804324[+]	SAT1	NM_002970	354	311-351
CCR4604	chr17:80615636-80615676[-]	RAB40B	NM_006822	796	63-103
CCR4606	chr3:49053268-49053308[+]	WDR6	NM_018031	665	547-587
CCR4607	chr21:40565658-40565698[-]	BRWD1	NM_033656	6037	2487-2527
CCR4612	chr14:105477176-105477216[-]	CDCA4	NM_017955	1631	325-365
CCR4613	chr12:122354663-122354703[+]	PSMD9	NM_002813	1554	446-486
CCR4616	chr1:12073392-12073432[+]	MFN2	NM_014874	1950	1770-1810
CCR4618	chr12:56863769-56863809[+]	SPRYD4	NM_207344	1406	408-448
CCR4626	chr5:176727130-176727170[+]	NSD1	NM_022455	4754	4670-4710
CCR4627	chr20:6018383-6018423[+]	CRLS1	NM_019095	2893	579-619
CCR4628	chr14:64152741-64152781[-]	SGPP1	NM_030791	1888	42-82
CCR4630	chr13:21948158-21948198[-]	ZDHHC20	NM_153251	4077	2589-2629
CCR4631	chr5:130540743-130540783[+]	LYRM7	NM_181705	5825	5449-5489
CCR4632	chr19:9272976-9273016[+]	ZNF317	NM_020933	1982	867-907
CCR4633	chr1:169433479-169433519[-]	SLC19A2	NM_006996	1938	1568-1608
CCR4637	chr5:174953912-174953952[+]	SFXN1	NM_022754	1884	175-215
CCR4638	chr19:47508245-47508285[+]	ARHGAP35	NM_004491	4388	4300-4340
CCR4641	chr5:150409825-150409865[-]	TNIP1	NM_006058	768	409-449
CCR4642	chr5:137772528-137772568[+]	KDM3B	NM_016604	1327	1139-1179
CCR4647	chr10:103545469-103545509[-]	MGEA5	NM_012215	2008	699-739
CCR4649	chr7:26231240-26231280[-]	HNRNPA2B1	NM_002137	2424	700-740
CCR4659	chr15:67495044-67495084[-]	AAGAB	NM_024666	1792	75-115
CCR4661	chr3:172348876-172348916[-]	NCEH1	NM_020792	2830	2349-2389
CCR4662	chr12:12627154-12627194[-]	DUSP16	NM_030640	3551	2573-2613
CCR4664	chr8:42693049-42693089[-]	THAP1	NM_018105	1288	16-56
CCR4664	chr8:42693049-42693089[-]	THAP1	NM_199003	1572	300-340
CCR4665	chr12:65859931-65859971[+]	MSRB3	NM_198080	3585	2829-2869
CCR4666	chrX:70793701-70793741[+]	OGT	NM_181672	2103	57-97
CCR4667	chr6:47592284-47592324[+]	CD2AP	NM_012120	3033	321-361
CCR4668	chr11:9610476-9610516[+]	WEE1	NM_003390	1164	327-367
CCR4679	chr4:39783933-39783973[+]	UBE2K	NM_005339	4356	3879-3919
CCR4691	chr20:61827896-61827936[-]	YTHDF1	NM_017798	1278	124-164
CCR4692	chr10:115489745-115489785[+]	CASP7	NM_001227	1365	446-486
CCR4692	chr10:115489745-115489785[+]	CASP7	NM_033340	1481	562-602
CCR4694	chr2:179330408-179330448[-]	FKBP7	NM_181342	2106	49-89
CCR4695	chr14:31364427-31364467[-]	STRN3	NM_014574	1612	150-190
CCR4696	chr17:5335898-5335938[+]	RPAIN	NM_001033002	449	7-47
CCR4696	chr17:5335898-5335938[+]	RPAIN	NM_001160246	471	29-69
CCR4696	chr17:5335898-5335938[+]	RPAIN	NM_001160266	457	15-55
CCR4697	chr10:104436568-104436608[-]	ARL3	NM_004311	3163	43-83
CCR4703	chr12:56665942-56665982[-]	CS	NM_004077	1385	886-926
CCR4704	chr12:65088831-65088871[+]	RASSF3	NM_178169	500	139-179
CCR4705	chr12:110973863-110973903[-]	PPTC7	NM_139283	2605	939-979
CCR4707	chr11:111745093-111745133[-]	FDXACB1	NM_138378	866	513-553
CCR4710	chr1:236140680-236140720[-]	NID1	NM_002508	2035	447-487
CCR4714	chr1:38003222-38003262[-]	SNIP1	NM_024700	1207	87-127
CCR4716	chr17:76420597-76420637[+]	PGS1	NM_024419	508	466-506
CCR4718	chr3:124949837-124949877[-]	ZNF148	NM_021964	6672	1308-1348
CCR4722	chr20:48741429-48741469[-]	TMEM189	NM_199129	1321	126-166
CCR4725	chr16:2758609-2758649[+]	KCTD5	NM_018992	1703	1281-1321
CCR4729	chr17:46025312-46025352[+]	PNPO	NM_018129	2526	1164-1204
CCR4733	chr2:73480102-73480142[+]	CCT7	NM_006429	161	113-153
CCR4734	chr8:16978035-16978075[+]	EFHA2	NM_181723	2352	239-279
CCR4738	chr11:85374766-85374806[-]	CREBZF	NM_001039618	6247	49-89
CCR4741	chr9:82340114-82340154[+]	TLE4	NM_007005	1597	55-95
CCR4744	chr6:149732222-149732262[+]	TAB2	NM_015093	1892	1367-1407
CCR4752	chr8:37720212-37720252[-]	RAB11FIP1	NM_025151	3948	161-201
CCR4757	chr9:115233001-115233041[+]	HSDL2	NM_032303	1861	177-217
CCR4759	chr12:54678576-54678616[+]	HNRNPA1	NM_002136	702	248-288
CCR4763	chr3:142029330-142029370[-]	XRN1	NM_019001	4904	983-1023
CCR4767	chr6:90341955-90341995[+]	ANKRD6	NM_014942	2680	1232-1272
CCR4769	chr14:95648436-95648476[-]	CLMN	NM_024734	9625	9425-9465
CCR4774	chr12:54789813-54789853[-]	ITGA5	NM_002205	1032	224-264
CCR4777	chr3:27414611-27414651[-]	SLC4A7	NM_003615	4041	3604-3644
CCR4778	chr4:10442440-10442480[-]	ZNF518B	NM_053042	3224	2248-2288
CCR4779	chr1:150937774-150937814[-]	CERS2	NM_022075	975	810-850
CCR4781	chr1:11850658-11850698[-]	MTHFR	NM_005957	4950	39-79
CCR4786	chr10:27475631-27475671[+]	MASTL	NM_032844	383	166-206
CCR4787	chr6:16304181-16304221[-]	ATXN1	NM_000332	7217	2339-2379
CCR4798	chr1:205682564-205682604[-]	NUCKS1	NM_022731	5461	4804-4844
CCR4799	chr6:80194769-80194809[-]	LCA5	NM_181714	2013	1912-1952
CCR4800	chr12:74933896-74933936[+]	ATXN7L3B	NM_001136262	3046	1710-1750
CCR4804	chr14:104026093-104026133[-]	BAG5	NM_004873	3277	25-65
CCR4807	chr14:32626965-32627005[+]	ARHGAP5	NM_001173	4780	2811-2851
CCR4814	chr19:58774802-58774842[+]	ZNF544	NM_014480	888	682-722
CCR4816	chr7:138992423-138992463[+]	UBN2	NM_173569	10400	9841-9881
CCR4819	chr22:39912017-39912057[+]	SMCR7L	NM_019008	3809	1689-1729
CCR4820	chr7:157061647-157061687[+]	UBE3C	NM_014671	1617	1198-1238
CCR4821	chr1:235331796-235331836[-]	ARID4B	NM_016374	1630	4-44
CCR4827	chr14:23442442-23442482[-]	AJUBA	NM_032876	2242	170-210
CCR4828	chr4:107269072-107269112[+]	AIMP1	NM_004757	1532	223-263
CCR4832	chr1:78414108-78414148[-]	FUBP1	NM_003902	860	303-343
CCR4835	chr17:40995214-40995254[+]	PSME3	NM_005789	2182	1619-1659
CCR4837	chr1:213165986-213166026[-]	ANGEL2	NM_144567	2859	2357-2397
CCR4838	chr17:27588909-27588949[-]	NUFIP2	NM_020772	8703	2608-2648
CCR4839	chr2:200136191-200136231[-]	SATB2	NM_015265	2711	703-743
CCR4840	chr3:149235782-149235822[-]	WWTR1	NM_015472	3570	2770-2810
CCR4841	chr3:53320184-53320224[-]	DCP1A	NM_018403	4153	1374-1414
CCR4842	chr1:214522316-214522356[-]	PTPN14	NM_005401	9226	8909-8949
CCR4844	chr7:155100351-155100391[+]	INSIG1	NM_005542	1965	371-411
CCR4844	chr7:155100351-155100391[+]	INSIG1	NM_198336	1877	283-323
CCR4844	chr7:155100351-155100391[+]	INSIG1	NM_198337	2012	418-458
CCR4846	chr10:93623049-93623089[+]	TNKS2	NM_025235	2476	293-333
CCR4851	chr11:94906311-94906351[-]	SESN3	NM_144665	286	68-108
CCR4853	chr14:54943332-54943372[-]	GMFB	NM_004124	3597	1434-1474
CCR4855	chr5:114951437-114951477[-]	TMED7	NM_181836	3001	429-469
CCR4857	chr10:74035189-74035229[+]	DDIT4	NM_019058	851	243-283
CCR4858	chr19:6751273-6751313[+]	TRIP10	NM_004240	307	51-91
CCR4861	chr15:32930171-32930211[+]	ARHGAP11A	NM_014783	1822	125-165
CCR4867	chr2:110374794-110374834[+]	SOWAHC	NM_023016	2920	1150-1190
CCR4868	chr1:200522444-200522484[-]	KIF14	NM_014875	1891	32-72
CCR4870	chr4:42119049-42119089[-]	BEND4	NM_001159547	6873	654-694
CCR4870	chr4:42119049-42119089[-]	BEND4	NM_207406	6665	446-486
CCR4871	chr10:98717231-98717271[+]	LCOR	NM_032440	8519	1552-1592
CCR4875	chr1:24861884-24861924[+]	RCAN3	NM_013441	660	117-157
CCR4876	chr14:74168037-74168077[+]	DNAL1	NM_031427	6004	5392-5432
CCR4877	chr17:35876190-35876230[-]	SYNRG	NM_007247	4143	2813-2853
CCR4881	chr14:95555333-95555373[-]	DICER1	NM_001195573	4386	1578-1618
CCR4881	chr14:95555333-95555373[-]	DICER1	NM_030621	4270	1462-1502
CCR4882	chr17:7757249-7757289[+]	KDM6B	NM_001080424	1279	410-450
CCR4883	chr5:72206558-72206598[+]	TNPO1	NM_002270	5715	2058-2098
CCR4885	chr14:70833362-70833402[-]	SYNJ2BP	NM_018373	6495	6306-6346
CCR4887	chr6:151677706-151677746[+]	AKAP12	NM_005100	2845	857-897
CCR4888	chr1:225589666-225589706[-]	LBR	NM_002296	1801	1299-1339
CCR4890	chrX:48419566-48419606[+]	TBC1D25	NM_002536	1634	203-243
CCR4892	chr11:59404506-59404546[-]	PATL1	NM_152716	1671	1317-1357
CCR4897	chr12:56632665-56632705[-]	ANKRD52	NM_173595	5335	4221-4261
CCR4898	chr6:150571320-150571360[+]	PPP1R14C	NM_030949	1572	1364-1404
CCR4899	chrX:153715762-153715802[-]	SLC10A3	NM_019848	196	44-84
CCR4900	chr6:15520550-15520590[+]	JARID2	NM_004973	1771	68-108
CCR4901	chr17:74731053-74731093[-]	SRSF2	NM_001195427	1049	155-195
CCR4901	chr17:74731053-74731093[-]	SRSF2	NM_003016	2044	1150-1190
CCR4912	chr6:138412227-138412267[-]	PERP	NM_022121	3537	912-952
CCR4914	chr14:95648391-95648431[-]	CLMN	NM_024734	9625	9470-9510
CCR4916	chr19:4543276-4543316[-]	SEMA6B	NM_032108	1013	297-337
CCR4918	chrX:84527080-84527120[+]	ZNF711	NM_021998	1534	246-286
CCR4920	chr17:42473816-42473856[-]	GPATCH8	NM_001002909	2291	1080-1120
CCR4921	chr2:209101751-209101791[-]	IDH1	NM_005896	850	12-52
CCR4928	chr3:8920389-8920429[-]	RAD18	NM_020165	4161	2612-2652
CCR4929	chr17:37410247-37410287[-]	FBXL20	NM_032875	8816	7426-7466
CCR4935	chr5:86687150-86687190[+]	RASA1	NM_002890	1033	450-490
CCR4936	chr17:60023548-60023588[-]	MED13	NM_005121	3863	241-281
CCR4940	chr7:21553374-21553414[+]	SP4	NM_003112	3264	2487-2527
CCR4941	chr3:41280865-41280905[+]	CTNNB1	NM_001904	1106	32-72
CCR4942	chr13:25914564-25914604[+]	NUPL1	NM_014089	2289	292-332
CCR4944	chrX:123042021-123042061[+]	XIAP	NM_001167	6791	990-1030
CCR4945	chr6:26285364-26285404[-]	HIST1H4H	NM_003543	62	12-52
CCR4948	chr5:172563423-172563463[+]	CREBRF	NM_153607	5543	2675-2715
CCR4951	chr11:74352983-74353023[+]	POLD3	NM_006591	1954	1172-1212
CCR4953	chr12:21671037-21671077[+]	GOLT1B	NM_016072	2696	2396-2436
CCR4954	chr7:106842891-106842931[+]	HBP1	NM_012257	1098	1015-1055
CCR4955	chr7:149563764-149563804[+]	ZNF862	NM_001099220	3195	2391-2431
CCR4956	chr1:151007801-151007841[+]	PRUNE	NM_021222	1479	1091-1131
CCR4958	chr6:138413042-138413082[-]	PERP	NM_022121	3537	97-137
CCR4960	chr12:123641300-123641340[-]	MPHOSPH9	NM_022782	408	14-54
CCR4961	chr4:6710060-6710100[-]	MRFAP1L1	NM_203462	957	286-326
CCR4962	chr19:12811664-12811704[-]	TNPO2	NM_013433	2070	374-414
CCR4964	chr10:106072092-106072132[-]	ITPRIP	NM_033397	2267	2034-2074
CCR4969	chr10:102034590-102034630[-]	BLOC1S2	NM_173809	1506	589-629
CCR4973	chr3:12624561-12624601[+]	MKRN2	NM_014160	1458	809-849
CCR4974	chr6:17608705-17608745[+]	FAM8A1	NM_016255	3380	135-175
CCR4976	chr1:36769833-36769873[+]	THRAP3	NM_005119	1339	215-255
CCR4981	chrX:72904033-72904073[+]	CHIC1	NM_001039840	6097	3193-3233
CCR4982	chr2:32448642-32448682[+]	SLC30A6	NM_017964	3399	2860-2900
CCR4989	chr17:63008127-63008167[-]	GNA13	NM_006572	4968	2208-2248
CCR4991	chr17:57771890-57771930[+]	CLTC	NM_004859	3104	677-717
CCR4992	chr14:38060107-38060147[-]	FOXA1	NM_004496	1379	423-463
CCR4993	chr7:10973216-10973256[-]	NDUFA4	NM_002489	448	7-47
CCR4994	chr6:13364930-13364970[-]	GFOD1	NM_018988	1156	5-45
CCR4996	chr5:32603147-32603187[+]	SUB1	NM_006713	2995	1957-1997
CCR4997	chr6:16302444-16302484[-]	ATXN1	NM_000332	7217	4076-4116
CCR5001	chr2:87001597-87001637[+]	RMND5A	NM_022780	4630	1063-1103
CCR5004	chr19:58266163-58266203[+]	ZNF776	NM_173632	3472	108-148
CCR5011	chr4:108832258-108832298[+]	SGMS2	NM_152621	4495	549-589
CCR5017	chr10:72188258-72188298[+]	EIF4EBP2	NM_004096	6871	6755-6795
CCR5018	chr16:9210775-9210815[+]	C16orf72	NM_014117	2786	6-46
CCR5020	chrX:17772516-17772556[+]	SCML1	NM_006746	1593	1004-1044
CCR5024	chr19:50411425-50411465[-]	NUP62	NM_012346	1412	31-71
CCR5039	chr1:167392920-167392960[+]	POU2F1	NM_002697	11535	7873-7913
CCR5042	chr12:101787028-101787068[-]	ARL1	NM_001177	2503	2350-2390
CCR5043	chr10:23730040-23730080[+]	OTUD1	NM_001145373	1478	208-248
CCR5045	chr6:19840139-19840179[+]	ID4	NM_001546	1489	713-753
CCR5047	chr17:29222251-29222291[+]	ATAD5	NM_024857	364	320-360
CCR5048	chr7:105731496-105731536[-]	SYPL1	NM_006754	1299	715-755
CCR5049	chr5:140698272-140698312[-]	TAF7	NM_005642	505	250-290
CCR5052	chr6:21598034-21598074[+]	SOX4	NM_003107	2659	1844-1884
CCR5053	chr5:58266087-58266127[-]	PDE4D	NM_006203	5625	4364-4404
CCR5055	chr9:21332932-21332972[-]	KLHL9	NM_018847	1987	33-73
CCR5056	chr6:47592637-47592677[+]	CD2AP	NM_012120	3033	674-714
CCR5062	chr8:98863758-98863798[+]	LAPTM4B	NM_018407	1128	56-96
CCR5065	chrX:24003690-24003730[-]	KLHL15	NM_030624	4205	2308-2348
CCR5071	chr1:28563001-28563041[+]	ATPIF1	NM_178191	1644	34-74
CCR5072	chr18:22642459-22642499[-]	ZNF521	NM_015461	788	177-217
CCR5075	chr2:228425051-228425091[+]	AGFG1	NM_004504	6727	5840-5880
CCR5078	chr2:174232411-174232451[+]	CDCA7	NM_031942	1326	19-59
CCR5081	chr1:222839317-222839357[+]	MIA3	NM_198551	2390	356-396
CCR5086	chr10:99093324-99093364[-]	FRAT2	NM_012083	1374	264-304
CCR5088	chr1:220987201-220987241[+]	MARC1	NM_022746	981	441-481
CCR5100	chr5:78671587-78671627[-]	HOMER1	NM_004272	2046	205-245
CCR5103	chr17:62495855-62495895[-]	DDX5	NM_004396	1667	146-186
[truncated: 4,906 more rows]

## Sheet: Top100-expressed miRs in HEK293
Rank	MiRNA
1	hsa-miR-103a-3p
2	hsa-miR-93-5p
3	hsa-miR-93-3p
4	hsa-miR-19b-3p
5	hsa-miR-106b-5p
6	hsa-miR-106b-3p
7	hsa-let-7a-5p
8	hsa-miR-19a-3p
9	hsa-miR-10a-5p
10	hsa-miR-17-5p
11	hsa-miR-17-3p
12	hsa-miR-92a-3p
13	hsa-miR-20a-5p
14	hsa-miR-21-5p
15	hsa-let-7f-5p
16	hsa-miR-30e-5p
17	hsa-miR-30e-3p
18	hsa-miR-25-3p
19	hsa-miR-186-5p
20	hsa-miR-101-3p
21	hsa-miR-301a-3p
22	hsa-miR-18a-5p
23	hsa-miR-18a-3p
24	hsa-miR-10b-5p
25	hsa-miR-16-5p
26	hsa-miR-26a-5p
27	hsa-miR-378a-3p
28	hsa-miR-27b-3p
29	hsa-miR-148a-3p
30	hsa-miR-30a-5p
31	hsa-miR-26b-5p
32	hsa-miR-374a-5p
33	hsa-miR-374a-3p
34	hsa-miR-30d-5p
35	hsa-miR-30c-5p
36	hsa-miR-15a-5p
37	hsa-miR-196a-5p
38	hsa-miR-99b-5p
39	hsa-miR-191-5p
40	hsa-miR-107
41	hsa-miR-196b-5p
42	hsa-let-7b-5p
43	hsa-miR-183-5p
44	hsa-miR-148b-3p
45	hsa-miR-218-5p
46	hsa-let-7g-5p
47	hsa-miR-221-3p
48	hsa-miR-130a-3p
49	hsa-miR-182-5p
50	hsa-miR-320a
51	hsa-miR-15b-5p
52	hsa-miR-340-5p
53	hsa-miR-9-5p
54	hsa-miR-423-3p
55	hsa-miR-29a-3p
56	hsa-miR-99a-5p
57	hsa-miR-130b-3p
58	hsa-miR-130b-5p
59	hsa-miR-24-3p
60	hsa-miR-301b
61	hsa-miR-181a-5p
62	hsa-miR-29b-3p
63	hsa-miR-374b-5p
64	hsa-miR-125a-5p
65	hsa-miR-33a-5p
66	hsa-miR-34a-5p
67	hsa-miR-151a-5p
68	hsa-miR-140-3p
69	hsa-miR-32-5p
70	hsa-miR-23b-3p
71	hsa-let-7i-5p
72	hsa-let-7e-5p
73	hsa-miR-222-3p
74	hsa-miR-7-5p
75	hsa-miR-27a-3p
76	hsa-miR-425-5p
77	hsa-miR-151a-3p
78	hsa-miR-181c-5p
79	hsa-miR-22-3p
80	hsa-miR-126-3p
81	hsa-miR-126-5p
82	hsa-miR-29c-3p
83	hsa-miR-421
84	hsa-miR-192-5p
85	hsa-miR-125b-5p
86	hsa-miR-424-5p
87	hsa-miR-96-5p
88	hsa-let-7d-5p
89	hsa-miR-30b-5p
90	hsa-miR-769-5p
91	hsa-miR-128
92	hsa-miR-590-3p
93	hsa-miR-331-3p
94	hsa-miR-361-5p
95	hsa-miR-652-3p
96	hsa-let-7c
97	hsa-miR-484
98	hsa-miR-548b-3p
99	hsa-miR-744-5p
100	hsa-miR-615-3p
