# Supplementary material for: Cupid: simultaneous reconstruction of microRNA-target and ceRNA networks
Source: HighWire-hosted journal article supplement (doi:10.1101/gr.178194.114), 2014-11-05
Supplement: Table_S3.xlsx [file Table_S3.xlsx]

## Sheet: Overall
	Total Pos	True Pos	False Pos	False Neg	Recall (%)	Precision (%)	F-measure (%)
Cupid Step I	869	411	10883	458	47.2957	3.6391	6.7582
Cupid Step II	869	275	5388	594	31.6456	4.85608	8.42009
Cupid Step III	869	206	3281	663	23.7054	5.90766	9.45822
miRanda	869	508	46398	361	58.458	1.08302	2.12664
PITA	869	432	33812	437	49.7123	1.26153	2.46063
TargetScan	869	619	24505	250	71.2313	2.46378	4.76282
DIANA-microT-CDS	869	507	27299	362	58.3429	1.82335	3.53618
ElMMo	869	598	22809	271	68.8147	2.55479	4.92668
miRmap	869	494	15057	375	56.847	3.17664	6.01705
mirSVR	869	723	41023	146	83.1991	1.7319	3.39317
RepTar	869	550	26683	319	63.2911	2.01961	3.91431
RNA22	869	557	41750	312	64.0967	1.31657	2.58014
RNAhybrid	869	233	13716	636	26.8124	1.67037	3.14482
TargetSpy	869	832	83355	37	95.7422	0.988276	1.95636

## Sheet: mir-18a (GSE14847)
	Total Pos	True Pos	False Pos	False Neg	Recall (%)	Precision (%)	F-measure (%)
Cupid Step I	160	58	2100	102	36.25	2.688	5.004
Cupid Step II	160	48	1154	112	30	3.993	7.048
Cupid Step III	160	34	715	126	21.25	4.539	7.481
miRanda	160	120	9638	40	75	1.23	2.42
PITA	160	94	6993	66	58.75	1.326	2.594
TargetScan	160	93	4363	67	58.125	2.087	4.029
DIANA-microT-CDS	160	81	4863	79	50.625	1.638	3.174
ElMMo	160	92	3970	68	57.5	2.265	4.358
miRmap	160	77	2834	83	48.125	2.645	5.015
mirSVR	160	120	7691	40	75	1.536	3.011
RepTar	160	95	5225	65	59.375	1.786	3.467
RNA22	160	95	7269	65	59.375	1.29	2.525
RNAhybrid	160	61	3654	99	38.125	1.642	3.148
TargetSpy	160	151	13786	9	94.375	1.083	2.142

## Sheet: mir-193b (GSE14847)
	Total Pos	True Pos	False Pos	False Neg	Recall (%)	Precision (%)	F-measure (%)
Cupid Step I	155	54	1461	101	34.839	3.564	6.467
Cupid Step II	155	17	384	138	10.968	4.239	6.115
Cupid Step III	155	10	141	145	6.452	6.623	6.536
miRanda	155	137	11642	18	88.387	1.163	2.296
PITA	155	81	7410	74	52.258	1.081	2.119
TargetScan	155	98	3734	57	63.226	2.557	4.916
DIANA-microT-CDS	155	96	4471	59	61.935	2.102	4.066
ElMMo	155	88	3304	67	56.774	2.594	4.962
miRmap	155	68	2396	87	43.871	2.76	5.193
mirSVR	155	126	6037	29	81.29	2.044	3.989
RepTar	155	90	4420	65	58.065	1.996	3.859
RNA22	155	128	9809	27	82.581	1.288	2.537
RNAhybrid	155	36	2612	119	23.226	1.36	2.569
TargetSpy	155	150	13057	5	96.774	1.136	2.245

## Sheet: mir-206 (GSE14847)
	Total Pos	True Pos	False Pos	False Neg	Recall (%)	Precision (%)	F-measure (%)
Cupid Step I	210	102	1141	108	48.571	8.206	14.04
Cupid Step II	210	83	885	127	39.524	8.574	14.092
Cupid Step III	210	63	605	147	30	9.431	14.351
miRanda	210	71	3361	139	33.81	2.069	3.899
PITA	210	96	3956	114	45.714	2.369	4.505
TargetScan	210	140	2566	70	66.667	5.174	9.602
DIANA-microT-CDS	210	116	3293	94	55.238	3.403	6.411
ElMMo	210	138	2489	72	65.714	5.253	9.729
miRmap	210	101	1325	109	48.095	7.083	12.347
mirSVR	210	174	4681	36	82.857	3.584	6.871
RepTar	210	126	4300	84	60	2.847	5.436
RNA22	210	112	4905	98	53.333	2.232	4.285
RNAhybrid	210	38	963	172	18.095	3.796	6.276
TargetSpy	210	198	14016	12	94.286	1.393	2.745

## Sheet: mir-302c (GSE14847)
	Total Pos	True Pos	False Pos	False Neg	Recall (%)	Precision (%)	F-measure (%)
Cupid Step I	164	83	2420	81	50.61	3.316	6.224
Cupid Step II	164	50	986	114	30.488	4.826	8.333
Cupid Step III	164	36	581	128	21.951	5.835	9.219
miRanda	164	97	7749	67	59.146	1.236	2.422
PITA	164	87	5487	77	53.049	1.561	3.032
TargetScan	164	131	5378	33	79.878	2.378	4.618
DIANA-microT-CDS	164	105	4896	59	64.024	2.1	4.066
ElMMo	164	131	5265	33	79.878	2.428	4.712
miRmap	164	112	3839	52	68.293	2.835	5.443
mirSVR	164	142	7853	22	86.585	1.776	3.481
RepTar	164	115	4418	49	70.122	2.537	4.897
RNA22	164	109	5978	55	66.463	1.791	3.487
RNAhybrid	164	28	1272	136	17.073	2.154	3.825
TargetSpy	164	161	13736	3	98.171	1.159	2.29

## Sheet: mir-145 (GSE19737)
	Total Pos	True Pos	False Pos	False Neg	Recall (%)	Precision (%)	F-measure (%)
Cupid Step I	45	22	1831	23	48.889	1.187	2.318
Cupid Step II	45	13	753	32	28.889	1.697	3.206
Cupid Step III	45	8	395	37	17.778	1.985	3.571
miRanda	45	36	10383	9	80	0.346	0.688
PITA	45	18	5819	27	40	0.308	0.612
TargetScan	45	34	4479	11	75.556	0.753	1.492
DIANA-microT-CDS	45	25	4812	20	55.556	0.517	1.024
ElMMo	45	29	3813	16	64.444	0.755	1.492
miRmap	45	25	2653	20	55.556	0.934	1.836
mirSVR	45	35	7387	10	77.778	0.472	0.937
RepTar	45	24	4919	21	53.333	0.486	0.962
RNA22	45	24	7180	21	53.333	0.333	0.662
RNAhybrid	45	9	3113	36	20	0.288	0.568
TargetSpy	45	43	14561	2	95.556	0.294	0.587

## Sheet: mir-101-1 (GSE31397)
	Total Pos	True Pos	False Pos	False Neg	Recall (%)	Precision (%)	F-measure (%)
Cupid Step I	135	92	1930	43	68.148	4.55	8.53
Cupid Step II	135	64	1226	71	47.407	4.961	8.982
Cupid Step III	135	55	844	80	40.741	6.118	10.638
miRanda	135	47	3625	88	34.815	1.28	2.469
PITA	135	56	4147	79	41.481	1.332	2.582
TargetScan	135	123	3985	12	91.111	2.994	5.798
DIANA-microT-CDS	135	84	4964	51	62.222	1.664	3.241
ElMMo	135	120	3968	15	88.889	2.935	5.683
miRmap	135	111	2010	24	82.222	5.233	9.84
mirSVR	135	126	7374	9	93.333	1.68	3.301
RepTar	135	100	3401	35	74.074	2.856	5.501
RNA22	135	89	6609	46	65.926	1.329	2.605
RNAhybrid	135	61	2102	74	45.185	2.82	5.309
TargetSpy	135	129	14199	6	95.556	0.9	1.784

## Sheet: Validated Step III Interaction
MiRNA	Gene Symbol	Fold Change
hsa-miR-101-3p	ANKRD52	0.7049
hsa-miR-101-3p	ANXA2	0.692843
hsa-miR-101-3p	AP3S1	0.650806
hsa-miR-101-3p	APP	0.648501
hsa-miR-101-3p	ASAP1	0.690537
hsa-miR-101-3p	ATG4D	0.669567
hsa-miR-101-3p	ATXN1	0.62754
hsa-miR-101-3p	ATXN1L	0.655065
hsa-miR-101-3p	BICD2	0.685895
hsa-miR-101-3p	C20orf20	0.60341
hsa-miR-101-3p	CDK8	0.607312
hsa-miR-101-3p	CEBPA	0.663745
hsa-miR-101-3p	CERS2	0.673262
hsa-miR-101-3p	DAG1	0.69365
hsa-miR-101-3p	DCBLD2	0.606849
hsa-miR-101-3p	DIP2B	0.685753
hsa-miR-101-3p	DSTYK	0.710911
hsa-miR-101-3p	EED	0.661457
hsa-miR-101-3p	EZH2	0.665108
hsa-miR-101-3p	FAM108C1	0.676152
hsa-miR-101-3p	FAM60A	0.700501
hsa-miR-101-3p	G3BP2	0.657754
hsa-miR-101-3p	GNB1	0.637453
hsa-miR-101-3p	HNRNPF	0.662894
hsa-miR-101-3p	KIF5B	0.621683
hsa-miR-101-3p	LCOR	0.696406
hsa-miR-101-3p	LMNB1	0.685971
hsa-miR-101-3p	MAPK1	0.660678
hsa-miR-101-3p	MGAT4A	0.714096
hsa-miR-101-3p	MOB4	0.561738
hsa-miR-101-3p	NAP1L1	0.605135
hsa-miR-101-3p	NDFIP1	0.69268
hsa-miR-101-3p	NFIB	0.631218
hsa-miR-101-3p	NPNT	0.509121
hsa-miR-101-3p	PBX3	0.711384
hsa-miR-101-3p	PURB	0.58617
hsa-miR-101-3p	RAB5A	0.522963
hsa-miR-101-3p	RANBP9	0.63634
hsa-miR-101-3p	RAP1B	0.697179
hsa-miR-101-3p	RBBP7	0.680171
hsa-miR-101-3p	SGPP1	0.706553
hsa-miR-101-3p	SMARCA5	0.625365
hsa-miR-101-3p	STAMBP	0.683655
hsa-miR-101-3p	STC1	0.527623
hsa-miR-101-3p	STMN1	0.523325
hsa-miR-101-3p	SUB1	0.508461
hsa-miR-101-3p	SYNCRIP	0.699468
hsa-miR-101-3p	TDG	0.561225
hsa-miR-101-3p	TGFBR1	0.656183
hsa-miR-101-3p	TMEM65	0.664799
hsa-miR-101-3p	TMEM9B	0.663423
hsa-miR-101-3p	UBE2D1	0.696874
hsa-miR-101-3p	ZBTB5	0.705027
hsa-miR-101-3p	ZNF207	0.672115
hsa-miR-101-5p	BICD2	0.685895
hsa-miR-101-5p	LCOR	0.696406
hsa-miR-101-5p	RAP1B	0.697179
hsa-miR-101-5p	RCN2	0.487722
hsa-miR-101-5p	SYNCRIP	0.699468
hsa-miR-145-3p	GMFB	0.62465
hsa-miR-145-3p	PPP6C	0.671994
hsa-miR-145-5p	AP1G1	0.660349
hsa-miR-145-5p	FAM108C1	0.462245
hsa-miR-145-5p	GLIS3	0.694309
hsa-miR-145-5p	GMFB	0.62465
hsa-miR-145-5p	PPP6C	0.671994
hsa-miR-145-5p	RTKN	0.644928
hsa-miR-145-5p	SERPINE1	0.646266
hsa-miR-145-5p	UXS1	0.699061
hsa-miR-18a-3p	ESR1	0.489391
hsa-miR-18a-3p	GREB1	0.463047
hsa-miR-18a-5p	ALCAM	0.690996
hsa-miR-18a-5p	ATXN1	0.687051
hsa-miR-18a-5p	BBX	0.603414
hsa-miR-18a-5p	BTG3	0.662577
hsa-miR-18a-5p	C5orf30	0.646656
hsa-miR-18a-5p	CCND1	0.668352
hsa-miR-18a-5p	CDC42	0.546609
hsa-miR-18a-5p	DCUN1D1	0.707425
hsa-miR-18a-5p	ERLIN1	0.683991
hsa-miR-18a-5p	ESR1	0.489391
hsa-miR-18a-5p	FAM136A	0.453948
hsa-miR-18a-5p	FNDC3B	0.710088
hsa-miR-18a-5p	HIF1A	0.436992
hsa-miR-18a-5p	KLHL20	0.698068
hsa-miR-18a-5p	LMO4	0.689475
hsa-miR-18a-5p	MBNL1	0.657873
hsa-miR-18a-5p	NCOA1	0.595742
hsa-miR-18a-5p	NXT2	0.652229
hsa-miR-18a-5p	PHF19	0.606135
hsa-miR-18a-5p	PHLPP2	0.628624
hsa-miR-18a-5p	PIM1	0.672851
hsa-miR-18a-5p	RAD51B	0.576407
hsa-miR-18a-5p	RARA	0.653596
hsa-miR-18a-5p	RBM24	0.629152
hsa-miR-18a-5p	SEPHS1	0.712786
hsa-miR-18a-5p	SH3BP4	0.587544
hsa-miR-18a-5p	TBPL1	0.506878
hsa-miR-18a-5p	TEX2	0.472374
hsa-miR-18a-5p	TIPARP	0.681904
hsa-miR-18a-5p	TMEM2	0.634882
hsa-miR-18a-5p	TMEM248	0.619231
hsa-miR-18a-5p	TOR1B	0.705662
hsa-miR-18a-5p	WASF3	0.630724
hsa-miR-193b-3p	ARPC5	0.672455
hsa-miR-193b-3p	CBFB	0.601364
hsa-miR-193b-3p	CBX1	0.675909
hsa-miR-193b-3p	CNOT6	0.640007
hsa-miR-193b-3p	DNAJB9	0.550487
hsa-miR-193b-3p	KRAS	0.642407
hsa-miR-193b-3p	SLC16A6	0.624243
hsa-miR-193b-3p	SLC30A9	0.69989
hsa-miR-193b-3p	YWHAZ	0.586442
hsa-miR-193b-5p	PIGA	0.636243
hsa-miR-206	AKAP11	0.622165
hsa-miR-206	ANXA4	0.65536
hsa-miR-206	AP1S1	0.385024
hsa-miR-206	AP3S1	0.510722
hsa-miR-206	ARF3	0.470775
hsa-miR-206	ARF4	0.472262
hsa-miR-206	ARFIP1	0.608682
hsa-miR-206	ATP6V1A	0.608015
hsa-miR-206	C5orf51	0.651921
hsa-miR-206	CAP1	0.503565
hsa-miR-206	CCNC	0.582254
hsa-miR-206	CD164	0.670222
hsa-miR-206	CHSY1	0.627392
hsa-miR-206	CLCN3	0.687757
hsa-miR-206	CLTC	0.484057
hsa-miR-206	CORO1C	0.513989
hsa-miR-206	DHX15	0.540887
hsa-miR-206	E2F5	0.427172
hsa-miR-206	EAF1	0.680874
hsa-miR-206	EML4	0.558191
hsa-miR-206	EPB41L1	0.651569
hsa-miR-206	FAM91A1	0.656602
hsa-miR-206	FNDC3A	0.647293
hsa-miR-206	GOLPH3	0.691691
hsa-miR-206	GPD2	0.473413
hsa-miR-206	H3F3B	0.61202
hsa-miR-206	IFT52	0.586129
hsa-miR-206	KIAA0528	0.689642
hsa-miR-206	KIF2A	0.49592
hsa-miR-206	LASP1	0.46526
hsa-miR-206	MAN1A1	0.61371
hsa-miR-206	MEA1	0.641393
hsa-miR-206	MEX3C	0.647809
hsa-miR-206	MMD	0.583369
hsa-miR-206	NRP1	0.549046
hsa-miR-206	NXT2	0.459367
hsa-miR-206	OSTF1	0.406515
hsa-miR-206	PDCD4	0.632273
hsa-miR-206	PPIB	0.705892
hsa-miR-206	PTPLAD1	0.474971
hsa-miR-206	PTPRK	0.70142
hsa-miR-206	RPA1	0.689542
hsa-miR-206	SERP1	0.307532
hsa-miR-206	SH3BGRL3	0.696029
hsa-miR-206	SLC31A1	0.703255
hsa-miR-206	SLC44A1	0.297611
hsa-miR-206	SMARCB1	0.55594
hsa-miR-206	SMEK2	0.672707
hsa-miR-206	SNX2	0.439843
hsa-miR-206	SPRED1	0.58936
hsa-miR-206	SRSF3	0.631967
hsa-miR-206	TH1L	0.650554
hsa-miR-206	THBS1	0.5963
hsa-miR-206	TPM4	0.565065
hsa-miR-206	TWF1	0.519981
hsa-miR-206	UBQLN1	0.692281
hsa-miR-206	UST	0.70407
hsa-miR-206	VAMP4	0.617033
hsa-miR-206	WBP1L	0.694352
hsa-miR-206	WDFY1	0.6535
hsa-miR-206	XPO6	0.556518
hsa-miR-206	YWHAQ	0.578657
hsa-miR-206	ZFP36L1	0.519959
hsa-miR-302c-3p	ASF1A	0.56381
hsa-miR-302c-3p	BCL11B	0.710507
hsa-miR-302c-3p	CNOT6	0.561197
hsa-miR-302c-3p	CROT	0.445955
hsa-miR-302c-3p	CYP26B1	0.552597
hsa-miR-302c-3p	DAZAP2	0.391081
hsa-miR-302c-3p	DYRK4	0.611689
hsa-miR-302c-3p	EFR3A	0.693934
hsa-miR-302c-3p	FNDC3A	0.683262
hsa-miR-302c-3p	GMCL1	0.670491
hsa-miR-302c-3p	GNPDA2	0.682523
hsa-miR-302c-3p	MBNL1	0.586304
hsa-miR-302c-3p	MTMR4	0.534544
hsa-miR-302c-3p	MXD1	0.712726
hsa-miR-302c-3p	NFIA	0.617782
hsa-miR-302c-3p	NFIB	0.634367
hsa-miR-302c-3p	PRMT6	0.69957
hsa-miR-302c-3p	R3HDM1	0.688358
hsa-miR-302c-3p	RAB11A	0.651343
hsa-miR-302c-3p	RAB6A	0.708618
hsa-miR-302c-3p	RAPGEFL1	0.560059
hsa-miR-302c-3p	RBM24	0.697425
hsa-miR-302c-3p	REEP3	0.70366
hsa-miR-302c-3p	SLC39A6	0.443409
hsa-miR-302c-3p	TEX2	0.703367
hsa-miR-302c-3p	TGFBR2	0.658069
hsa-miR-302c-3p	TRPS1	0.712385
hsa-miR-302c-3p	UBE2Q2	0.62711
hsa-miR-302c-3p	ZNF800	0.698625
hsa-miR-302c-5p	ATP6V0A2	0.61729
hsa-miR-302c-5p	CDK19	0.548491
hsa-miR-302c-5p	CMPK1	0.488798
hsa-miR-302c-5p	CYB5R4	0.582653
hsa-miR-302c-5p	ELOVL5	0.700477
hsa-miR-302c-5p	HIF1A	0.643709
hsa-miR-302c-5p	MBNL1	0.586304
hsa-miR-302c-5p	RAB6A	0.708618
hsa-miR-302c-5p	SSFA2	0.59175
hsa-miR-302c-5p	ZNF800	0.698625
