# Supplementary material for: Cupid: simultaneous reconstruction of microRNA-target and ceRNA networks
Source: HighWire-hosted journal article supplement (doi:10.1101/gr.178194.114), 2014-11-05
Supplement: Table_S4.xlsx [file Table_S4.xlsx]

## Sheet: Raw RPPA output (MDA-MB-231)
Gene Symbol	Antibody	Mock (4 replicates)	Mock Average	Mock S.E.M.	hsa-let-7a-3p	hsa-let-7a-5p	hsa-let-7d-5p	hsa-let-7g-3p	hsa-let-7g-5p	hsa-miR-101-3p	hsa-miR-101-5p	hsa-miR-103a-3p	hsa-miR-105-3p	hsa-miR-106a-5p	hsa-miR-106b-3p	hsa-miR-106b-5p	hsa-miR-107	hsa-miR-10b-3p	hsa-miR-1184	hsa-miR-1185-5p	hsa-miR-1225-3p	hsa-miR-124-3p	hsa-miR-1245a	hsa-miR-125a-5p	hsa-miR-125b-2-3p	hsa-miR-126-3p	hsa-miR-1285-3p	hsa-miR-1289	hsa-miR-129-5p	hsa-miR-1299	hsa-miR-136-3p	hsa-miR-136-5p	hsa-miR-145-5p	hsa-miR-146a-5p	hsa-miR-147a	hsa-miR-148a-3p	hsa-miR-148b-3p	hsa-miR-149-3p	hsa-miR-150-3p	hsa-miR-151a-3p	hsa-miR-153	hsa-miR-15b-5p	hsa-miR-17-5p	hsa-miR-181b-5p	hsa-miR-181c-3p	hsa-miR-185-3p	hsa-miR-18a-3p	hsa-miR-18a-5p	hsa-miR-18b-5p
ACACA	ACC1.R.C_GBL.9014824	1.492971282,1.573744181,1.490601451,1.578437845	1.53394	0.0243603	1.95291	1.26497	1.21348	1.21258	1.22117	1.52358	1.42338	1.42016	1.28692	1.43574	1.55266	1.84492	1.43701	1.50871	1.52051	1.41435	1.50719	1.2706	1.71105	1.5266	1.56689	1.23806	1.31428	1.3996	1.72914	1.58928	1.52942	1.36368	1.59544	1.5156	1.30508	1.47777	1.40206	1.4384	1.04714	1.58636	1.49353	1.5025	1.68816	1.56187	1.42281	1.06757	1.33835	1.60662	1.701
ACACA,ACACB	ACC_pS79.R.V_GBL.9014843	0.209969437,0.232855986,0.235803934,0.245559534	0.231047	0.00753203	0.28154	0.254736	0.265605	0.223094	0.234147	0.220332	0.219455	0.23133	0.194312	0.241815	0.2916	0.211188	0.230658	0.218934	0.214442	0.205649	0.265281	0.208959	0.242164	0.207726	0.257286	0.216977	0.197566	0.21826	0.289054	0.292465	0.293116	0.21899	0.311206	0.258772	0.235582	0.189273	0.219874	0.264608	0.184248	0.20963	0.217162	0.191097	0.220187	0.190124	0.238433	0.161162	0.202693	0.252199	0.22195
AKT1,AKT2,AKT3	Akt.R.V_GBL.9014827	0.741476381,0.78274042,0.708958831,0.740250192	0.743356	0.0151313	0.697588	0.768527	0.809301	0.589912	0.76362	0.665233	0.734528	0.86009	0.725909	0.770529	0.787207	0.721201	0.798359	0.719565	0.842599	0.719663	0.733097	0.838108	0.560956	0.714867	0.757328	0.795793	0.771169	0.755668	0.796462	0.71231	0.603223	0.696747	0.779407	0.702874	0.753924	0.682395	0.680693	0.537352	0.80039	0.652979	0.692798	0.821527	0.691822	0.692489	0.626734	0.771297	0.688295	0.654109	0.593901
AKT1,AKT2,AKT3	Akt_pS473.R.V_GBL.9014825	0.032016565,0.031856279,0.035065589,0.038299664	0.0343095	0.00152121	0.0174753	0.0173925	0.0168644	0.0191556	0.019348	0.0208031	0.0206845	0.0229163	0.0263034	0.0243583	0.0227457	0.0256355	0.0213391	0.0209818	0.0256319	0.0217091	0.0173993	0.0225304	0.0145566	0.0208236	0.0158739	0.0140527	0.0227654	0.0249987	0.0272538	0.023197	0.0239499	0.0326945	0.0191217	0.0174299	0.0174096	0.0270722	0.0247349	0.0160633	0.0179624	0.0155489	0.0196434	0.0258434	0.0283769	0.019957	0.0164933	0.0138108	0.0148913	0.0176525	0.0194145
AKT1,AKT2,AKT3	Akt_pT308.R.V_GBL.9014971	0.114336515,0.073535965,0.064857677,0.048323489	0.0752634	0.0140349	0.128787	0.0725012	0.081931	0.128003	0.102583	0.0753833	0.0766641	0.0694133	0.109644	0.0771101	0.0723661	0.0558107	0.0697081	0.0610234	0.0634192	0.0749049	0.0675475	0.055837	0.0736678	0.072102	0.0766852	0.0997162	0.106397	0.126358	0.105198	0.132044	0.0703733	0.0778685	0.138806	0.130752	0.0630553	0.141154	0.0882118	0.0983546	0.104162	0.0750752	0.0813742	0.0474366	0.070122	0.0740833	0.080712	0.0668944	0.0557964	0.061037	0.141313
AKT1S1	PRAS40_pT246.R.V_GBL.9014915	0.198632911,0.191096748,0.217953585,0.214448453	0.205533	0.00638862	0.207175	0.198418	0.22608	0.178054	0.231941	0.275501	0.222932	0.265074	0.193102	0.264806	0.224189	0.269441	0.265264	0.20271	0.247014	0.248939	0.205851	0.189763	0.201763	0.239926	0.239236	0.204869	0.219801	0.212812	0.247075	0.199168	0.220942	0.18402	0.229014	0.241899	0.212165	0.223159	0.244066	0.1578	0.218987	0.21898	0.213492	0.279216	0.276516	0.202727	0.192043	0.182771	0.216477	0.232033	0.177241
ANXA1	Annexin.I.R.V_GBL.9014990	0.699154918,0.77380877,0.730681918,0.748385619	0.738008	0.015686	0.977047	0.921944	0.924086	1.08801	0.948368	0.80629	0.854542	0.793265	0.815232	0.854709	0.873552	0.912323	0.866607	0.972716	0.915442	0.957403	0.832423	1.11117	0.85048	0.846076	0.805031	0.808397	0.870708	0.823162	0.77793	0.780704	0.986645	0.803502	0.821637	1.00933	1.21515	0.80863	1.02969	0.899071	0.911475	0.816278	0.709797	0.899709	0.834325	0.82599	0.716644	0.802018	0.817569	0.891088	0.8015
AR	AR.R.V_GBL.9014831	0.017375467,0.018978138,0.017085232,0.017638256	0.0177693	0.000418481	0.0169389	0.0149358	0.0144792	0.0161455	0.0152531	0.0189328	0.0183324	0.0188461	0.0264647	0.0181654	0.0170253	0.0216528	0.0171779	0.0190981	0.0162329	0.0165167	0.0176898	0.0188042	0.0175589	0.018692	0.0173482	0.0170299	0.016016	0.0171958	0.0156893	0.0151873	0.0161495	0.0185573	0.0191846	0.0173764	0.0166502	0.0167791	0.0378098	0.0174344	0.0180925	0.0165558	0.0152337	0.0160861	0.0195943	0.0165958	0.0177993	0.015078	0.0172163	0.0180951	0.016539
BAK1	Bak.R.C_GBL.9014832	0.181878059,0.1941721,0.200965676,0.195825031	0.19321	0.00404483	0.193383	0.182369	0.185596	0.179756	0.164932	0.17694	0.176752	0.1762	0.188697	0.178846	0.197349	0.199161	0.177628	0.198074	0.198298	0.182636	0.177649	0.176637	0.184103	0.192566	0.178312	0.172141	0.189249	0.18922	0.169407	0.175746	0.16752	0.187431	0.164068	0.162626	0.164452	0.169263	0.179261	0.182437	0.173973	0.186853	0.191701	0.180841	0.178377	0.19115	0.171574	0.17471	0.173677	0.164375	0.177214
BAX	Bax.R.V_GBL.9014833	0.456986183,0.442386014,0.444960281,0.432626376	0.44424	0.0050108	0.528979	0.470683	0.475783	0.585777	0.521396	0.477975	0.537578	0.482625	0.519752	0.436592	0.523925	0.476172	0.487874	0.462387	0.419097	0.492823	0.43002	0.473462	0.481872	0.439207	0.513272	0.506623	0.487042	0.46426	0.536327	0.490238	0.476086	0.484262	0.438556	0.490917	0.493143	0.432008	0.419435	0.551376	0.512638	0.528989	0.514154	0.521581	0.45595	0.442078	0.520177	0.550509	0.454257	0.592351	0.496675
BCL2	Bcl.2.M.V_GBL.9014998	0.036484178,0.035609261,0.02814743,0.030687786	0.0327322	0.0019907	0.0252046	0.0335899	0.0295903	0.0236579	0.0352153	0.0382635	0.0371768	0.0335352	0.0275307	0.0287146	0.0315811	0.0344674	0.030028	0.0400281	0.0271944	0.0345898	0.0276233	0.0263134	0.0288999	0.0365902	0.0315996	0.0246586	0.0291944	0.0263757	0.0290715	0.0344151	0.0353895	0.0381604	0.0290444	0.0297546	0.0237682	0.0257214	0.0301231	0.0283789	0.028531	0.0298754	0.0302401	0.027035	0.0367016	0.0281492	0.0292623	0.0338738	0.0329159	0.028239	0.0309827
BCL2L1	Bcl.X.R.V_GBL.9014835	0.346338322,0.334424628,0.3141477,0.327030633	0.330485	0.00674344	0.357508	0.285848	0.290158	0.268199	0.28739	0.292299	0.278485	0.351283	0.305922	0.315284	0.292767	0.340489	0.355378	0.288628	0.349231	0.265237	0.299393	0.310652	0.314675	0.279199	0.318372	0.30331	0.297686	0.279959	0.351661	0.261104	0.288671	0.308247	0.319245	0.34943	0.358087	0.300828	0.332552	0.247951	0.352507	0.333126	0.309199	0.357426	0.35744	0.343827	0.316392	0.256102	0.30732	0.417828	0.335226
BCL2L1	Bcl.xL.R.V_GBL.9014834	0.208890247,0.200467077,0.189349334,0.176157172	0.193716	0.00708999	0.193911	0.159801	0.173215	0.174866	0.166784	0.1739	0.175602	0.190472	0.160525	0.203165	0.159296	0.197575	0.19555	0.169185	0.177251	0.161696	0.16232	0.183129	0.170228	0.175839	0.167881	0.186671	0.177479	0.154597	0.197204	0.162471	0.190392	0.175404	0.174375	0.194222	0.214104	0.17654	0.211746	0.154072	0.215788	0.187153	0.17296	0.187451	0.193534	0.187521	0.169858	0.162225	0.165757	0.225895	0.179013
BCL2L11	Bim.R.V_GBL.9014838	0.105494252,0.098730239,0.102584044,0.096017678	0.100707	0.00208843	0.106342	0.126372	0.131691	0.124504	0.128035	0.10761	0.146148	0.123058	0.109856	0.114164	0.133806	0.116823	0.122725	0.113324	0.110641	0.118755	0.12669	0.104613	0.107201	0.104561	0.122764	0.144364	0.112045	0.11385	0.118807	0.116543	0.115257	0.119345	0.121301	0.135254	0.112436	0.125977	0.142348	0.136778	0.131516	0.113054	0.116949	0.116925	0.113826	0.122915	0.144363	0.146118	0.108772	0.155803	0.131318
BECN1	Beclin.G.V_GBL.9014969	0.09298151,0.092182823,0.10616872,0.099002728	0.0975839	0.00324122	0.0922527	0.109682	0.106711	0.118425	0.107231	0.0761542	0.101998	0.0830556	0.11767	0.116898	0.0964878	0.0951747	0.0785734	0.0871617	0.0889771	0.0948551	0.1012	0.10447	0.127977	0.0831522	0.0976083	0.11719	0.0938126	0.105856	0.112923	0.0933156	0.115174	0.102005	0.0956997	0.101604	0.130211	0.0883548	0.110585	0.090669	0.125416	0.0951774	0.0919517	0.0838168	0.0823993	0.0929069	0.0803377	0.0822255	0.103067	0.0957344	0.0995685
BID	Bid.R.C_GBL.9014837	0.132466105,0.144789643,0.132224767,0.133120465	0.13565	0.00305234	0.143474	0.121703	0.125495	0.12982	0.121081	0.13144	0.130739	0.127115	0.125847	0.121561	0.132114	0.139761	0.126911	0.11961	0.119289	0.138153	0.131026	0.119864	0.132022	0.144924	0.126742	0.11934	0.137504	0.130097	0.117943	0.131989	0.118758	0.127729	0.118651	0.128448	0.114453	0.139958	0.109238	0.133523	0.105603	0.129866	0.1281	0.124799	0.123563	0.129914	0.128418	0.128576	0.131591	0.117012	0.124763
BIRC2	cIAP.R.V_GBL.9014848	0.283129009,0.296052436,0.274811213,0.286708317	0.285175	0.00439947	0.254931	0.27683	0.267046	0.275522	0.308696	0.233912	0.268136	0.243436	0.257553	0.29142	0.241918	0.313213	0.245112	0.251855	0.258003	0.256107	0.250259	0.278652	0.264538	0.273784	0.232417	0.246512	0.29564	0.2797	0.248873	0.266848	0.29144	0.263328	0.193029	0.252918	0.287841	0.290316	0.343857	0.255097	0.325291	0.248598	0.291008	0.245978	0.279178	0.258799	0.218398	0.258668	0.259771	0.340915	0.2734
CASP3	Caspase.3_active.R.C_GBL.9014991	0.010249745,0.008992621,0.008905035,0.008262416	0.00910245	0.00041563	0.0128718	0.00913534	0.0108068	0.00930773	0.0111877	0.00788709	0.00905483	0.0116468	0.00922705	0.00976998	0.00783964	0.0109723	0.0134364	0.0085118	0.00918889	0.00887232	0.00860374	0.00965924	0.00845089	0.0113553	0.00773659	0.00912652	0.00843511	0.00988007	0.0105564	0.0102028	0.0107722	0.0190589	0.0103881	0.00926847	0.00952779	0.00889767	0.0103163	0.00932457	0.0108899	0.00797025	0.00860901	0.00838762	0.0106853	0.00901282	0.0081433	0.0105318	0.00868606	0.0111096	0.0108451
CASP7	Caspase.7_cleavedD198.R.C_GBL.9014840	0.009817086,0.007505076,0.008950428,0.007531374	0.00845099	0.00056687	0.00967589	0.0085955	0.0068673	0.0112967	0.0108906	0.00706967	0.00799286	0.00689761	0.00946864	0.0058186	0.00635099	0.00643301	0.00583964	0.00742553	0.00670358	0.00892586	0.0065097	0.00636181	0.00636157	0.00720175	0.00742631	0.00783021	0.00989885	0.00980214	0.00919192	0.0112133	0.00566084	0.00753614	0.0122505	0.0113581	0.0060344	0.0121117	0.00716064	0.0117911	0.00765064	0.00761854	0.00491665	0.00696194	0.00763106	0.00783282	0.00638855	0.00831345	0.00738294	0.00523008	0.0115184
CASP7	Caspase.7_cleavedD198.R.C_GBL.9014992	0.006418728,0.005710693,0.005637798,0.005569252	0.00583412	0.000196998	0.00702433	0.00765141	0.0096607	0.014084	0.0101548	0.00799692	0.0136141	0.00727304	0.0116379	0.0100355	0.00709433	0.00704068	0.0102353	0.00667147	0.00501261	0.00626212	0.00952376	0.0144084	0.00705709	0.00470802	0.00720326	0.00800344	0.0082266	0.00723134	0.00819717	0.0108063	0.0127888	0.00697759	0.0108564	0.0115964	0.0119938	0.0113622	0.0103426	0.013942	0.0089425	0.00622378	0.00621721	0.0063337	0.00781378	0.0066644	0.00700463	0.00838048	0.00617562	0.0108902	0.0107776
CASP8	Caspase.8.M.C_GBL.9014945	0.236517935,0.227617155,0.250822407,0.230491067	0.236362	0.00516452	0.249834	0.224578	0.214081	0.209257	0.217154	0.253258	0.232717	0.241125	0.263196	0.22383	0.230421	0.187857	0.217411	0.262489	0.267665	0.251106	0.241119	0.253983	0.267992	0.244278	0.258744	0.220546	0.287052	0.252624	0.234974	0.237259	0.229129	0.235455	0.228437	0.220338	0.239951	0.229788	0.217185	0.242214	0.200818	0.259694	0.259773	0.239105	0.21225	0.208892	0.187741	0.205076	0.302423	0.234586	0.241002
CASP9	Caspase.9_cleavedD330.R.C_GBL.9014841	0.114223226,0.111938042,0.10359449,0.098982506	0.107185	0.00356254	0.104376	0.105559	0.106584	0.109079	0.106376	0.0958272	0.139166	0.101513	0.107276	0.0980886	0.100128	0.116653	0.103674	0.108353	0.102662	0.113825	0.10618	0.111466	0.10078	0.113864	0.102804	0.107808	0.107434	0.104467	0.111381	0.095657	0.10933	0.0963035	0.103455	0.102662	0.114329	0.0989964	0.0964652	0.12187	0.107687	0.105191	0.0953054	0.105361	0.10537	0.109388	0.102804	0.110605	0.104315	0.120654	0.109841
CAV1	Caveolin.1.R.V_GBL.9014842	2.072187029,2.587353811,2.225762551,2.344888821	2.30755	0.108693	3.37854	2.19797	2.07499	2.63733	2.10003	3.1119	2.25283	2.44709	1.62937	2.40166	2.16001	2.37669	2.48136	1.98501	2.08481	2.18322	2.08027	0.833914	1.09849	2.18862	1.81894	2.79902	0.978333	2.05678	2.16219	2.22061	2.14584	2.6151	2.06688	2.31558	3.2803	1.88138	1.95048	1.63956	1.87902	1.99552	2.3836	3.73541	2.2092	2.26427	2.58325	1.86526	1.62377	2.14623	1.97473
CCNB1	Cyclin.B1.R.V_GBL.9014858	0.746782254,0.771672775,0.780261522,0.82565877	0.781094	0.016464	0.764885	0.927416	0.980752	0.281971	1.05928	1.0971	0.859453	0.421754	0.627629	0.685114	0.503234	0.828948	0.424272	0.40953	0.571608	1.17278	0.711506	0.205581	0.5903	0.752931	0.613186	0.487929	0.717957	0.819098	0.338574	0.5561	0.753431	0.72515	0.483795	0.58	0.271398	0.799341	0.770492	0.349039	0.597233	0.564825	1.01366	0.374327	0.700041	0.77196	1.53184	0.763641	0.854241	0.585136	0.617876
CCND1	Cyclin.D1.R.V_GBL.9014859	0.199693592,0.191114139,0.190812845,0.167469763	0.187273	0.0069145	0.172002	0.167153	0.151127	0.151009	0.168787	0.170329	0.191777	0.229326	0.18918	0.179581	0.178528	0.187928	0.220537	0.182823	0.182594	0.190768	0.174987	0.210328	0.187055	0.185163	0.172451	0.199411	0.173092	0.17084	0.165563	0.168001	0.167452	0.180365	0.173839	0.189832	0.17732	0.160897	0.180932	0.171955	0.214516	0.173853	0.181984	0.19121	0.144522	0.194879	0.175185	0.153042	0.189106	0.193087	0.177288
CCNE1	Cyclin_E1.M.V_GBL.9014950	0.102914276,0.101597993,0.099204777,0.109585415	0.103326	0.00222337	0.0841467	0.144482	0.125059	0.0860465	0.115068	0.105977	0.126191	0.0866943	0.125607	0.102767	0.0774763	0.0898564	0.0684458	0.101296	0.110587	0.0844509	0.0724168	0.161967	0.0999078	0.099597	0.109699	0.0932031	0.214791	0.116157	0.124665	0.127485	0.115635	0.0998912	0.101719	0.102307	0.111996	0.0988072	0.094836	0.105026	0.113122	0.117688	0.096613	0.0814813	0.0964093	0.112132	0.106904	0.118637	0.0979393	0.107425	0.107733
CCNE1	Cyclin_E1.M.V_GBL.9014986	0.10406226,0.101815873,0.09746357,0.099396425	0.100685	0.00143535	0.0944012	0.110762	0.125318	0.0778368	0.119218	0.104624	0.112024	0.0835533	0.115012	0.0967303	0.0760835	0.101997	0.0816414	0.105175	0.0996895	0.0810129	0.084169	0.155408	0.0885227	0.0940014	0.103069	0.0967359	0.194147	0.118657	0.125423	0.11866	0.119889	0.102703	0.115285	0.0928731	0.123393	0.0911898	0.0993298	0.0952611	0.0805201	0.114243	0.0921449	0.0840461	0.0953038	0.0969613	0.109736	0.118149	0.0829601	0.126083	0.122825
CDH1	E.Cadherin.R.V_GBL.9014862	0.029608711,0.031681981,0.028276431,0.02466239	0.0285574	0.00147531	0.0303985	0.0495488	0.0428554	0.0524451	0.0388666	0.0316418	0.0525558	0.0287175	0.0512232	0.0433737	0.0482976	0.0248644	0.0272926	0.0437843	0.0401711	0.0429282	0.0361683	0.0577284	0.0333228	0.0290797	0.0312032	0.0414415	0.0332456	0.0313139	0.050556	0.0272807	0.0541152	0.0504489	0.0348196	0.0298542	0.0423322	0.0297878	0.0421142	0.0334783	0.0378431	0.0208436	0.0490097	0.0486781	0.0292985	0.0360854	0.0337987	0.0312497	0.0262196	0.0393025	0.0337584
CDH2	N.Cadherin.R.V_GBL.9014893	0.065770226,0.065129204,0.067912892,0.07080043	0.0674032	0.00127928	0.069932	0.0680311	0.0617912	0.0802943	0.0600233	0.0612591	0.0684434	0.0829235	0.0631881	0.0668665	0.068867	0.0698634	0.0620689	0.0637737	0.0585101	0.0595738	0.0599969	0.0709433	0.0635503	0.0675132	0.0633825	0.0622702	0.0796834	0.0629299	0.0774165	0.0653016	0.0645763	0.074324	0.0637333	0.0678772	0.0594467	0.0595426	0.0722432	0.058178	0.0730038	0.066579	0.0751735	0.0681612	0.0662524	0.0570649	0.0708995	0.0798367	0.0652718	0.0677881	0.0612038
CDH3	P.Cadherin.R.C_GBL.9014909	0.24186726,0.216079445,0.21815008,0.195457589	0.217889	0.00949328	0.179681	0.196312	0.195711	0.211798	0.184404	0.191714	0.215483	0.184296	0.208892	0.181974	0.187458	0.171621	0.172559	0.22044	0.184387	0.211689	0.179057	0.17937	0.206064	0.211316	0.195515	0.19124	0.206775	0.187899	0.30066	0.202391	0.191996	0.229149	0.184112	0.193346	0.187323	0.196441	0.240435	0.21511	0.177515	0.219068	0.240472	0.182052	0.198289	0.198202	0.20242	0.208101	0.199145	0.184205	0.209059
CDK1	CDK1.R.V_GBL.9014844	0.319154537,0.27051071,0.258697642,0.252340593	0.275176	0.0151351	0.292756	0.272871	0.28571	0.221961	0.325547	0.285026	0.224525	0.193901	0.283534	0.229805	0.226548	0.258874	0.191682	0.209912	0.210255	0.343152	0.270127	0.15518	0.20214	0.264724	0.205352	0.264093	0.239065	0.334853	0.222698	0.294881	0.210882	0.255659	0.336671	0.320065	0.177003	0.36736	0.282971	0.231592	0.288097	0.231599	0.329753	0.202351	0.227828	0.257603	0.415224	0.231291	0.263614	0.207924	0.365262
CDK1	CDK1.R.V_GBL.9014947	0.142838854,0.143524566,0.137494028,0.150777462	0.143659	0.00272901	0.138782	0.14055	0.143284	0.132304	0.139961	0.146015	0.13443	0.134475	0.130236	0.131642	0.136303	0.142608	0.135239	0.1318	0.144916	0.15577	0.144338	0.121794	0.140001	0.136083	0.13036	0.142923	0.139593	0.13412	0.131423	0.149925	0.123488	0.138095	0.131124	0.138556	0.129658	0.142547	0.130201	0.138727	0.134321	0.134642	0.143839	0.133355	0.127103	0.145739	0.147354	0.137937	0.139552	0.133672	0.138941
CDKN1A	p21.R.C_GBL.9014898	0.225431323,0.235769838,0.253407509,0.245115138	0.239931	0.00602804	0.262814	0.272488	0.25144	0.164881	0.242343	0.272494	0.336186	0.267599	0.29111	0.240376	0.256059	0.166293	0.250287	0.297922	0.283257	0.21198	0.27333	0.213411	0.272492	0.185391	0.287921	0.252064	0.299874	0.272699	0.215201	0.23422	0.223063	0.245237	0.250575	0.227712	0.233405	0.256943	0.224396	0.214907	0.154817	0.252853	0.27205	0.284142	0.228083	0.176755	0.254129	0.190657	0.251228	0.22509	0.243575
CDKN1B	p27.R.V_GBL.9014937	0.08025093,0.080717707,0.093247188,0.076199801	0.0826039	0.00368992	0.0818236	0.0829294	0.0831978	0.110163	0.0627598	0.11481	0.116407	0.0967585	0.0843743	0.0962072	0.113794	0.107164	0.101277	0.10021	0.105246	0.0895419	0.103435	0.131044	0.12127	0.0880276	0.11261	0.0934622	0.0889654	0.0951727	0.0961877	0.105014	0.0999449	0.0836907	0.107128	0.115072	0.107728	0.068121	0.0609921	0.122623	0.0950567	0.086032	0.0876191	0.11942	0.100396	0.104656	0.0992875	0.102949	0.0826565	0.177021	0.160459
CDKN1B	p27.R.V_GBL.9014980	0.006109172,0.005381756,0.006123132,0.00537423	0.00574707	0.000213113	0.00582433	0.00716526	0.00721699	0.0092773	0.00739842	0.00927975	0.00911232	0.00933944	0.00696252	0.0084515	0.0089959	0.00931225	0.00883032	0.00678097	0.00796829	0.0068252	0.00699445	0.0130126	0.00894829	0.00579612	0.0101289	0.00801359	0.00771665	0.00686581	0.0105096	0.00865923	0.00826107	0.00691382	0.00931653	0.0125001	0.0115559	0.0060007	0.0067927	0.0120355	0.0103212	0.00614423	0.00639334	0.0120058	0.00845509	0.00637823	0.00851908	0.00930506	0.00734139	0.0177282	0.0129868
CDKN1B	p27.R.V_GBL.9014994	0.054982913,0.052637082,0.060205866,0.053385337	0.0553028	0.001706	0.064434	0.0603327	0.064281	0.0821096	0.0642903	0.103589	0.0974771	0.0796927	0.0728233	0.0832533	0.0955704	0.0840614	0.0989534	0.0844538	0.0878841	0.0665793	0.0737517	0.127884	0.101049	0.0678877	0.0902172	0.0851282	0.0817299	0.0642906	0.0786135	0.0870833	0.0620182	0.075387	0.092301	0.0974292	0.101036	0.0475839	0.0479022	0.0985703	0.0789974	0.0694633	0.0555242	0.119561	0.0789299	0.0723062	0.0758804	0.082937	0.0644752	0.154793	0.133752
CDKN1B	p27_pT157.R.C_GBL.9014899	282550403.8,256185610,287234001.9,260358199.5	2.71582e+08	7.79056e+06	295841530	246075974	2.49603e+08	2.53132e+08	6.4772e+06	2.58298e+08	8.30419e+06	2.45062e+08	2.48618e+08	1.80663e+08	2.65949e+08	2.47e+08	260950009	3.25542e+08	6.9391e+06	371544246	2.73132e+08	2.91943e+08	2.82712e+08	2.7268e+08	2.63503e+08	250895252	2.77479e+08	2.56412e+08	1.46216e+08	2.547e+08	2.37517e+08	221534980	2.88866e+08	2.70085e+08	2.64735e+08	2.88981e+08	2.21257e+08	2.90103e+08	2.21821e+08	2.67338e+08	2.86281e+08	3.60609e+08	2.6975e+08	8.97266e+06	2.74754e+08	259686459	2.7004e+08	447159053	246383659
CDKN1B	p27_pT198.R.V_GBL.9014900	0.156646092,0.154131882,0.138712387,0.185018601	0.158627	0.009649	0.183342	0.169043	0.16985	0.157897	0.167778	0.138109	0.18804	0.135345	0.138429	0.146129	0.178557	0.159412	0.134878	0.167102	0.153457	0.215484	0.163234	0.191259	0.192748	0.148337	0.155748	0.165335	0.172546	0.145678	0.169076	0.195789	0.144803	0.167861	0.150503	0.162233	0.154712	0.197682	0.179017	0.157598	0.162018	0.166732	0.184516	0.155074	0.16	0.154926	0.132422	0.161513	0.189729	0.162461	0.168092
CHEK1	Chk1.R.C_GBL.9014846	0.262309672,0.268363502,0.255550142,0.270194408	0.264104	0.0033119	0.254152	0.271583	0.266989	0.268499	0.234318	0.275157	0.283107	0.26022	0.258743	0.295608	0.265455	0.294857	0.25091	0.27375	0.267615	0.252592	0.225451	0.251401	0.243208	0.292268	0.272338	0.261959	0.244825	0.25005	0.214484	0.25331	0.254687	0.250142	0.228663	0.23511	0.260174	0.270072	0.253883	0.228097	0.213239	0.250865	0.305945	0.269637	0.251613	0.269767	0.289154	0.232065	0.26706	0.214325	0.252151
CHEK1	Chk1.R.C_GBL.9014975	0.080004892,0.076304137,0.045317991,0.070113267	0.0679351	0.00781024	0.0672298	0.0646682	0.0619802	0.0593195	0.0607783	0.0685665	0.0613052	0.0799418	0.100449	0.0617711	0.0648376	0.0749505	0.0678806	0.0705402	0.0702824	0.0658703	0.0663136	0.0676284	0.143945	0.078041	0.0714932	0.0565438	0.0630806	0.0677908	0.056247	0.0672948	0.0628279	0.0662466	0.0636295	0.0644117	0.0593915	0.0658993	0.0699182	0.060567	0.0619753	0.0699283	0.0727066	0.0669949	0.077133	0.0716093	0.0711032	0.0602739	0.0652208	0.0631824	0.0659505
CHEK1	Chk1_pS345.R.C_GBL.9014845	0.137980736,0.142795835,0.12548972,0.136510117	0.135694	0.00365671	0.12412	0.124445	0.130471	0.123228	0.128365	0.138249	0.142144	0.135482	0.126148	0.135282	0.127594	0.146225	0.13242	0.117617	0.133423	0.128513	0.143658	0.131776	0.131371	0.125673	0.131208	0.134228	0.109902	0.128465	0.139979	0.136247	0.128956	0.133622	0.134245	0.12456	0.118221	0.134237	0.125215	0.125212	0.132185	0.133358	0.13265	0.121023	0.123194	0.140995	0.13545	0.128862	0.128202	0.134999	0.123025
CHEK2	Chk2.M.C_GBL.9014948	0.118147487,0.115068801,0.112710283,0.104723985	0.112663	0.0028708	0.124983	0.120201	0.130738	0.12614	0.127598	0.116274	0.158834	0.118889	0.124362	0.12952	0.123652	0.11219	0.11499	0.11168	0.0997839	0.115001	0.1052	0.106379	0.107275	0.11674	0.0996256	0.132377	0.113538	0.121276	0.113051	0.119149	0.141672	0.135753	0.11635	0.121908	0.100405	0.148916	0.132241	0.109939	0.130234	0.113709	0.136618	0.101527	0.129974	0.116325	0.151544	0.100977	0.113273	0.112741	0.114233
CHEK2	Chk2_pT68.R.C_GBL.9014976	0.059659713,0.058147896,0.058033948,0.061080789	0.0592306	0.000719465	0.050497	0.060137	0.0595107	0.0637824	0.0541534	0.0588113	0.074645	0.0596285	0.063145	0.0584822	0.060868	0.0590226	0.0586635	0.0555989	0.061274	0.0510759	0.0624203	0.0504604	0.0700393	0.0519395	0.064479	0.0547573	0.055137	0.0562006	0.0592781	0.0624527	0.0605255	0.0356335	0.0535888	0.0568629	0.0541403	0.0614332	0.0520459	0.0635541	0.0584372	0.0628922	0.0597178	0.0611999	0.0608844	0.0540607	0.0724275	0.0675409	0.0668641	0.0612718	0.0566499
CHEK2	Chk2_pT68.R.C_GBL.9014993	0.136371649,0.133028104,0.139134157,0.148991264	0.139381	0.00343794	0.163948	0.131211	0.126439	0.128779	0.14188	0.139418	0.140004	0.139881	0.139619	0.136349	0.135761	0.161188	0.141657	0.145193	0.13268	0.140655	0.142799	0.139632	0.143398	0.169157	0.149806	0.134552	0.141723	0.136752	0.123055	0.133943	0.136225	0.15379	0.152779	0.146793	0.131538	0.142269	0.117574	0.15164	0.117884	0.134307	0.142647	0.142355	0.143729	0.137527	0.145037	0.133737	0.144399	0.129708	0.135561
CLDN7	Claudin.7.R.V_GBL.9014851	0.035525194,0.036201117,0.0366979,0.033718215	0.0355356	0.000651719	0.0309632	0.035372	0.0365524	0.0574467	0.0344548	0.0428059	0.0366218	0.0424065	0.0379834	0.0395116	0.0315823	0.0416088	0.0389152	0.0369742	0.0287519	0.0318545	0.032814	0.0360311	0.0289589	0.0343344	0.0368416	0.0419892	0.0351007	0.0409421	0.0392237	0.0365051	0.0359835	0.0402534	0.0418926	0.0441669	0.0371155	0.0396218	0.0355839	0.0341904	0.0386791	0.0329285	0.0308477	0.0337888	0.0394969	0.032673	0.0319127	0.0323068	0.0355428	0.0370793	0.0431786
COL6A1	Collagen.VI.R.V_GBL.9014978	0.039501812,0.042887827,0.039574372,0.039636089	0.0404	0.000829721	0.0333882	0.0418841	0.0357809	0.0385826	0.0413489	0.0401449	0.0472575	0.0411283	0.0445606	0.0439937	0.0422509	0.034461	0.0411167	0.0404716	0.0387651	0.041877	0.0371999	0.0490943	0.0393086	0.0394083	0.036882	0.0444858	0.0438953	0.0373543	0.0422743	0.0356275	0.0521135	0.0303859	0.0371654	0.0358967	0.0513694	0.0354193	0.0502295	0.0485919	0.0543531	0.0385521	0.0414844	0.0418657	0.0381525	0.0393756	0.04127	0.0444388	0.0419482	0.0561956	0.0422221
CTNNA1	alpha.Catenin.M.V_GBL.9014941	0.246468765,0.240188069,0.258140791,0.572901736	0.329425	0.0812441	0.246526	0.259086	0.263922	0.221854	0.254587	0.240252	0.244786	0.222059	0.226806	0.231604	0.25069	0.246703	0.230876	0.256638	0.234105	0.267819	0.227876	0.248544	0.262618	0.226051	0.259409	0.259091	0.252148	0.239974	0.223899	0.232814	0.234235	0.216894	0.242536	0.241538	0.262388	0.236657	0.220315	0.270722	0.210432	0.248727	0.227344	0.259786	0.247095	0.232137	0.23316	0.231552	0.243554	0.215213	0.245533
CTNNA1	alpha.Catenin.M.V_GBL.9014983	0.188749262,0.211492905,0.175044772,0.185826732	0.190278	0.00766091	0.201447	0.193594	0.201474	0.18143	0.202124	0.178556	0.176008	0.183101	0.190673	0.215096	0.199662	0.186956	0.188372	0.196309	0.187994	0.214617	0.177812	0.203714	0.211597	0.18038	0.196538	0.203711	0.198722	0.183425	0.17348	0.192121	0.183918	0.176712	0.227132	0.200021	0.203576	0.179656	0.164815	0.216561	0.171532	0.193972	0.170793	0.198625	0.184168	0.180723	0.18702	0.191623	0.189477	0.177876	0.189248
CTNNB1	beta.Catenin.R.V_GBL.9014836	0.761896731,0.722037186,0.743577163,0.675906197	0.725854	0.018535	0.741835	0.923482	1.01158	0.638786	0.903416	0.73036	0.756407	0.759516	0.700833	0.616063	0.694935	0.666204	0.769205	0.747625	0.734726	1.03325	0.610655	0.664282	0.783827	0.682621	0.795664	0.790189	0.505294	0.705049	0.703934	0.684388	0.589027	0.692484	0.641487	0.886304	0.810224	0.603433	0.54175	0.650839	0.48394	0.840702	0.804124	0.722175	0.624702	0.601505	0.692424	0.740651	0.741215	0.572666	0.64651
DIABLO	Smac.M.V_GBL.9014956	0.429079975,0.385566452,0.410801436,0.368767186	0.398554	0.0133472	0.419516	0.3508	0.334604	0.321419	0.353833	0.383489	0.451369	0.417384	0.355692	0.464925	0.426191	0.474351	0.398037	0.406292	0.408006	0.427206	0.452529	0.419494	0.436114	0.438181	0.438585	0.400975	0.572336	0.432431	0.484207	0.437041	0.38084	0.373168	0.428927	0.408485	0.504171	0.366055	0.366339	0.491832	0.423865	0.434912	0.404121	0.3768	0.464614	0.422026	0.417423	0.510227	0.446018	0.482345	0.461857
DVL3	Dvl3.R.V_GBL.9014861	0.156385451,0.133136036,0.130720675,0.132802248	0.138261	0.00606503	0.140465	0.130555	0.123909	0.160794	0.138328	0.145216	0.161485	0.151899	0.133542	0.189171	0.139756	0.188567	0.152555	0.156727	0.143482	0.120768	0.146002	0.200885	0.138942	0.155023	0.154832	0.145738	0.122378	0.138595	0.160423	0.152235	0.125953	0.144079	0.146062	0.140053	0.150577	0.163182	0.18104	0.123878	0.138962	0.161188	0.126428	0.176627	0.192256	0.169928	0.150112	0.133767	0.142752	0.175996	0.164042
EEF2	eEF2.R.V_GBL.9014864	0.204473812,0.188575155,0.187972114,0.188842187	0.192466	0.0040068	0.18859	0.17006	0.164583	0.193587	0.186838	0.174158	0.199121	0.188692	0.250238	0.191977	0.191424	0.167078	0.192696	0.1837	0.184328	0.172649	0.182158	0.178904	0.189067	0.219523	0.185726	0.186927	0.200429	0.185992	0.229568	0.175674	0.178948	0.191287	0.186908	0.179528	0.188862	0.193048	0.185736	0.229216	0.18559	0.194657	0.201008	0.192296	0.197099	0.199718	0.196155	0.209455	0.186464	0.216867	0.179532
EEF2K	eEF2K.R.V_GBL.9014863	0.115431162,0.113693671,0.108562445,0.118328615	0.114004	0.00205032	0.137362	0.0818668	0.0796052	0.138689	0.0803123	0.119429	0.109726	0.11341	0.105917	0.100914	0.0915982	0.0989852	0.108341	0.115712	0.123536	0.125604	0.113307	0.10859	0.0986579	0.112572	0.0871821	0.123451	0.0848568	0.121522	0.142897	0.123135	0.116857	0.11107	0.107378	0.111916	0.1065	0.12103	0.115894	0.1001	0.0925029	0.102554	0.103582	0.121054	0.101413	0.110946	0.144027	0.0962568	0.0967112	0.102888	0.115096
EGFR	EGFR.R.C_GBL.9014867	0.118708053,0.132017362,0.120308189,0.135809314	0.126711	0.00424244	0.111747	0.144742	0.145817	0.0709786	0.142999	0.102294	0.116768	0.125659	0.127087	0.117617	0.13537	0.108921	0.128792	0.111003	0.143858	0.124135	0.127819	0.13152	0.125986	0.125391	0.122347	0.0939744	0.112037	0.135115	0.137615	0.12238	0.114698	0.11945	0.119695	0.0984372	0.105977	0.113855	0.132702	0.108758	0.129404	0.140337	0.121224	0.122217	0.108939	0.137409	0.123708	0.118064	0.13499	0.119506	0.120274
EGFR	EGFR_pY1068.R.V_GBL.9014878	0.062317903,0.059175095,0.070596038,0.073545837	0.0664087	0.00338541	0.0651411	0.0742867	0.0781465	0.0819858	0.065856	0.0577762	0.0786649	0.065769	0.108499	0.0744514	0.0702104	0.0594847	0.0705403	0.0654788	0.0940388	0.088357	0.083994	0.0658847	0.0677232	0.0771894	0.0697399	0.0636958	0.0566459	0.0868071	0.0908298	0.0827755	0.089147	0.0749933	0.0694063	0.0515736	0.0579531	0.0605184	0.0772708	0.0626827	0.0625837	0.068976	0.0849473	0.0659643	0.061796	0.0759497	0.0616806	0.0947474	0.0884318	0.0672039	0.0664261
EGFR	EGFR_pY1173.R.C_GBL.9014865	0.063156838,0.065384602,0.070055645,0.07143976	0.0675092	0.00194488	0.0643392	0.0745856	0.0802237	0.0731557	0.0639766	0.0605912	0.068455	0.0678528	0.0674887	0.070714	0.0641762	0.0614796	0.0700075	0.0588871	0.0772094	0.0885098	0.0691573	0.0790677	0.0688535	0.0668889	0.0691489	0.0657128	0.0657926	0.0711445	0.0959298	0.0718881	0.102106	0.0671928	0.073003	0.0636477	0.0781562	0.0695571	0.0815882	0.0704433	0.0852396	0.0682862	0.0734333	0.0587198	0.0634303	0.0685363	0.075405	0.073407	0.0762681	0.0831791	0.0662999
EIF4E	eIF4E.R.V_GBL.9014868	0.602506801,0.592859768,0.55860049,0.506556471	0.565131	0.0216784	0.557151	0.550305	0.541568	0.525818	0.596925	0.626977	0.591949	0.571159	0.567329	0.578876	0.587054	0.646726	0.606911	0.572954	0.532359	0.496212	0.488462	0.647356	0.576477	0.547338	0.65584	0.59145	0.633325	0.484535	0.669923	0.61237	0.523164	0.589128	0.594966	0.627071	0.572113	0.679199	0.686051	0.68495	0.735413	0.559851	0.595088	0.460649	0.626391	0.490995	0.548435	0.624302	0.599833	0.784401	0.692629
EIF4EBP1	X4E.BP1.R.V_GBL.9014821	0.318567084,0.302064035,0.321752324,0.289312638	0.307924	0.00755656	0.400092	0.266376	0.288115	0.234238	0.299583	0.300478	0.301667	0.291595	0.238801	0.290843	0.299207	0.315713	0.291436	0.25859	0.306192	0.250993	0.300408	0.242944	0.279287	0.305581	0.242369	0.309388	0.299357	0.29173	0.299879	0.300864	0.307994	0.299384	0.295981	0.285879	0.361653	0.373498	0.385315	0.283059	0.402327	0.295956	0.358231	0.237091	0.298987	0.341071	0.309991	0.215418	0.325284	0.216066	0.214342
EIF4EBP1	X4E.BP1_pS65.R.V_GBL.9014938	0.106937389,0.10372645,0.10711505,0.100289248	0.104517	0.00161005	0.11439	0.0983017	0.103194	0.0911849	0.104032	0.099817	0.0925875	0.104862	0.104743	0.108534	0.101448	0.117461	0.114425	0.0975096	0.0907808	0.0845112	0.0967434	0.0910034	0.0941439	0.108331	0.105665	0.10968	0.0985849	0.107169	0.103627	0.107643	0.109072	0.115171	0.0892106	0.0918901	0.10556	0.107647	0.106837	0.0892979	0.121827	0.105725	0.127425	0.0992833	0.112111	0.103758	0.102316	0.0922579	0.11153	0.103058	0.0928908
EIF4EBP1	X4EBP1_pT37.R.V_GBL.9014820	0.383743061,0.373625525,0.397914934,0.359910706	0.378799	0.00802805	0.431587	0.363792	0.360871	0.252468	0.423796	0.365747	0.3172	0.359414	0.320513	0.4267	0.348095	0.395593	0.393982	0.31976	0.380143	0.33148	0.377225	0.312698	0.319705	0.312839	0.344546	0.377003	0.356806	0.385725	0.410618	0.371681	0.421768	0.381453	0.355077	0.304396	0.527357	0.399093	0.500956	0.280865	0.528391	0.351291	0.451284	0.334806	0.405685	0.456822	0.350446	0.262494	0.401692	0.268455	0.244387
ERBB2	HER2.M.V_GBL.9014955	0.229185247,0.223378632,0.242116392,0.231776691	0.231614	0.00391628	0.206035	0.204411	0.199737	0.177421	0.203971	0.224403	0.203798	0.236359	0.197185	0.202337	0.187849	0.192911	0.227452	0.21308	0.215601	0.21043	0.220988	0.199734	0.218408	0.211875	0.232517	0.198061	0.174463	0.233424	0.230605	0.196242	0.21249	0.18399	0.228729	0.233521	0.227107	0.184635	0.187331	0.183109	0.197245	0.232532	0.208547	0.239414	0.201921	0.190841	0.178603	0.142786	0.250831	0.165091	0.157013
ERBB2	HER2.R.V_GBL.9014879	0.028163063,0.027325635,0.029990659,0.034660808	0.030035	0.00163923	0.0275499	0.0394324	0.0344693	0.0361021	0.0352833	0.0307355	0.0370349	0.0315338	0.0226645	0.0361654	0.0181633	0.0313437	0.022358	0.0256733	0.0315954	0.034158	0.0291497	0.032887	0.0274201	0.0296023	0.0322248	0.0392709	0.0230439	0.0258425	0.0362525	0.0274008	0.0379277	0.020629	0.0385472	0.0356708	0.040046	0.0310242	0.0321354	0.0370006	0.0320621	0.0281192	0.023052	0.0254905	0.0247504	0.0304897	0.0323924	0.0313652	0.0339212	0.0353126	0.0313884
ERBB2	HER2_pY1248.R.V_GBL.9014982	0.238636227,0.239073126,0.254106922,0.247014855	0.244708	0.0036774	0.258835	0.26149	0.254225	0.276649	0.259724	0.233819	0.253292	0.248339	0.287435	0.254941	0.292462	0.24598	0.261356	0.304297	0.288829	0.248979	0.296983	0.159784	0.263767	0.298921	0.266328	0.254273	0.225906	0.285313	0.303219	0.255156	0.273884	0.318489	0.268132	0.262829	0.172617	0.240894	0.220365	0.252656	0.236273	0.272502	0.256621	0.302313	0.268535	0.262343	0.260515	0.268066	0.269658	0.272763	0.292319
ERBB2	HER2_pY1248.R.V_GBL.9014995	0.078327598,0.086342234,0.082903934,0.081871205	0.0823612	0.00164958	0.0761059	0.092465	0.0910328	0.0919002	0.0905409	0.0914874	0.087882	0.0951938	0.0990658	0.103162	0.0986152	0.0964739	0.0950241	0.106751	0.102674	0.0844404	0.0923168	0.0834724	0.0976129	0.100665	0.0989069	0.0922336	0.0720095	0.0860529	0.118557	0.0918063	0.100489	0.096703	0.088529	0.0912291	0.0935678	0.0784078	0.0851858	0.0970012	0.11901	0.0951433	0.0877665	0.108262	0.0941328	0.0906767	0.0908282	0.102095	0.0886935	0.0934601	0.0899646
ERBB2	HER2_pY1248_GBL9014981	0.103343815,0.10142801,0.10465874,0.102803673	0.103059	0.000668681	0.0994329	0.0880721	0.0898538	0.0852894	0.0942756	0.102232	0.0995678	0.105034	0.119141	0.0946864	0.0963646	0.0833339	0.100973	0.0998114	0.0938473	0.107509	0.109832	0.0962026	0.0942466	0.0987703	0.0907726	0.0878092	0.083692	0.101124	0.12001	0.10827	0.101577	0.101031	0.102259	0.0996676	0.0917897	0.0792376	0.0882674	0.0974335	0.0903481	0.10213	0.103746	0.104239	0.111325	0.0927672	0.0918343	0.111098	0.105614	0.0942918	0.0917854
ERBB3	HER3.R.V_GBL.9014881	0.048058778,0.046114541,0.044986085,0.041500071	0.0451649	0.00137657	0.0405173	0.0617802	0.0647709	0.0534017	0.0656828	0.041251	0.0438426	0.0412871	0.0600261	0.0495568	0.0655524	0.0382668	0.0399138	0.0583409	0.0564582	0.0526485	0.0564746	0.0755856	0.0370437	0.0515168	0.055996	0.0579061	0.0395258	0.0386629	0.0631275	0.0466709	0.0642701	0.0572616	0.0438121	0.0652043	0.0713514	0.0394764	0.0565433	0.0477043	0.0689707	0.0399294	0.0513013	0.0624078	0.0460587	0.0491386	0.0465069	0.0475494	0.0298692	0.0644102	0.055709
ERBB3	HER3_pY1298.R.C_GBL.9014880	0.064478836,0.061385672,0.067025813,0.062714925	0.0639013	0.00121902	0.0587148	0.0621955	0.0650123	0.0608434	0.0649784	0.0727471	0.0625496	0.0654537	0.05736	0.0560138	0.0591749	0.0636528	0.0712522	0.0632967	0.062439	0.075387	0.0622701	0.0567292	0.0606169	0.0668457	0.0676364	0.0593183	0.0605456	0.0628505	0.0788396	0.0636746	0.0590962	0.0684757	0.061864	0.0674294	0.0632573	0.0579506	0.0653501	0.0638612	0.0752173	0.0617083	0.0681577	0.0645755	0.0573164	0.0612607	0.0584279	0.0588812	0.0618558	0.055111	0.06108
ERCC1	ERCC1.M.C_GBL.9014951	0.09938984,0.094920111,0.096714514,0.087108432	0.0945332	0.00263979	0.0869083	0.0728025	0.0781318	0.0708746	0.0837483	0.0911532	0.0805346	0.0909432	0.0685706	0.075231	0.0820331	0.084768	0.0864353	0.0780611	0.0821263	0.10308	0.0849731	0.0741105	0.0894132	0.087821	0.0888198	0.0894746	0.0940004	0.0934727	0.0827652	0.0802646	0.0733449	0.0750833	0.0823884	0.086641	0.0802717	0.0847604	0.0785954	0.0931633	0.0855863	0.0790898	0.0721644	0.0836275	0.0842647	0.0839619	0.0813828	0.0827734	0.0842292	0.0878762	0.0905241
ERRFI1	MIG.6.M.V_GBL.9014957	0.046672151,0.044929769,0.048349171,0.047016507	0.0467419	0.000704001	0.0600479	0.0405712	0.0424563	0.0327585	0.0424789	0.0496961	0.0388	0.0488665	0.0369592	0.047555	0.0435121	0.04815	0.0514215	0.0553843	0.0443757	0.0402731	0.05562	0.0407411	0.0513835	0.0432722	0.0486087	0.040499	0.0434897	0.0512048	0.0416772	0.0473274	0.0506205	0.0462013	0.0507672	0.0356784	0.0380522	0.0415062	0.0395409	0.0462522	0.0418633	0.0421392	0.0332868	0.0399772	0.050754	0.0586876	0.0294389	0.0388352	0.0606867	0.0458761	0.0504498
ERRFI1	MIG.6.M.V_GBL.9014987	0.809057766,0.812795447,0.911109192,0.869272428	0.850559	0.0244352	1.10566	0.810157	0.856614	0.670834	0.83073	0.925787	0.830975	0.87231	0.7874	1.01604	0.871124	0.855212	0.858966	1.01704	0.814114	0.766389	1.00136	1.0003	0.95629	0.859797	0.862251	0.800948	0.821232	0.907387	0.732929	0.776758	1.11767	0.907792	0.983092	0.65939	0.856412	0.783231	0.761361	0.909513	0.813005	0.729846	0.674554	0.870621	1.01359	1.06117	0.636475	0.76257	1.14334	0.844864	0.882738
ESR1	ER.alpha.R.V_GBL.9014870	0.002426868,0.001580089,0.002478305,0.001659488	0.00203619	0.000241182	0.00366911	0.00159651	0.00171345	0.00134081	0.00213064	0.00270716	0.00147672	0.00164855	0.00183867	0.00115036	0.00171355	0.00236747	0.00235833	0.00239516	0.00171584	0.00236746	0.00194666	0.00121289	0.00209134	0.00274208	0.00167757	0.0025348	0.00189337	0.00210674	0.00104232	0.00209671	0.0020635	0.00184799	0.00136607	0.00193526	0.00141158	0.00109452	0.00348927	0.000925481	0.00140016	0.0018315	0.00144893	0.0019292	0.00177688	0.00155509	0.00189138	0.00082951	0.00183432	0.00296612	0.00148896
ESR1	ER.alpha_pS118.R.V_GBL.9014869	0.279647718,0.284694525,0.284685545,0.289924776	0.284738	0.00209798	0.272979	0.297436	0.297641	0.338938	0.27479	0.288131	0.320784	0.271245	0.301357	0.311995	0.288299	0.308747	0.267581	0.269207	0.275688	0.295101	0.284383	0.374037	0.285622	0.285774	0.281318	0.319026	0.27686	0.290397	0.288282	0.260409	0.308636	0.321312	0.304648	0.292819	0.302428	0.304737	0.311069	0.298324	0.281241	0.279236	0.298424	0.272374	0.297082	0.275704	0.290489	0.31447	0.28472	0.291239	0.26889
FN1	Fibronectin.R.C_GBL.9014872	0.587028932,0.506320498,0.624141551,0.548880558	0.566593	0.0252916	0.558463	0.812868	0.8269	0.639687	0.857323	0.776654	0.575681	0.58437	0.510763	0.770296	0.436241	0.81362	0.571913	0.837267	0.711717	0.839316	0.630897	0.58317	0.888655	0.734384	0.85328	0.655795	0.496243	0.653751	0.619417	0.543245	0.59988	0.484214	0.899888	0.674662	0.512665	0.508254	0.450155	0.469457	0.434929	0.788047	0.543023	0.546476	0.831215	0.604643	0.635881	0.398645	0.537277	0.546396	0.741713
FOXO3	FOXO3a.R.C_GBL.9014874	0.059782326,0.054174604,0.055113263,0.049527063	0.0546493	0.0021021	0.0552517	0.0462896	0.0542048	0.0857642	0.0453417	0.0450822	0.0534762	0.0574009	0.057653	0.0491776	0.0497877	0.05917	0.0555423	0.0527708	0.045285	0.0513894	0.0489273	0.0453214	0.046556	0.0507162	0.0429967	0.047133	0.046811	0.0529428	0.0438129	0.0374711	0.0532513	0.0664473	0.0565327	0.0561091	0.0407132	0.0528757	0.0491913	0.0551355	0.0486897	0.0523962	0.0450119	0.04658	0.053283	0.0495366	0.0464645	0.0551688	0.0452698	0.0487248	0.0508937
FOXO3	FOXO3A_pS318_S321.R.C_GBL.9014873	0.258657061,0.258917698,0.290593901,0.236752619	0.26123	0.0110806	0.235182	0.23675	0.234886	0.235568	0.234005	0.207839	0.247407	0.223931	0.231163	0.213223	0.240316	0.216021	0.232927	0.235537	0.225412	0.25014	0.223614	0.23921	0.240805	0.250662	0.226074	0.215271	0.262946	0.230458	0.225297	0.229514	0.236989	0.232566	0.23585	0.229433	0.22662	0.21177	0.203408	0.250472	0.217905	0.22762	0.22212	0.258572	0.217131	0.248347	0.217245	0.230116	0.231679	0.207659	0.217164
GAB2	GAB2.R.V_GBL.9014875	0.378675964,0.365158611,0.360719607,0.364351389	0.367226	0.00393671	0.27754	0.351043	0.338272	0.365794	0.32258	0.317102	0.306422	0.347208	0.327023	0.39673	0.336391	0.347508	0.337538	0.297327	0.326724	0.288276	0.338752	0.205813	0.211196	0.325171	0.280853	0.270132	0.228033	0.350893	0.378442	0.331946	0.46152	0.375843	0.379786	0.29708	0.315944	0.356584	0.350985	0.219848	0.335339	0.330939	0.326087	0.341232	0.39117	0.340021	0.320493	0.249987	0.233574	0.193208	0.200432
GATA3	GATA3.M.V_GBL.9014953	0.112335031,0.105555566,0.110764226,0.112944875	0.1104	0.00167884	0.0881728	0.0917151	0.0948583	0.0928753	0.0897972	0.127597	0.112193	0.116492	0.0816617	0.0960154	0.107214	0.119251	0.116275	0.0895803	0.105952	0.104103	0.0947946	0.120127	0.106768	0.10539	0.0920246	0.106177	0.0985845	0.106894	0.107112	0.106987	0.105915	0.103604	0.101907	0.102183	0.112075	0.111424	0.105616	0.104354	0.108199	0.103687	0.106641	0.100702	0.108956	0.0899977	0.112301	0.104248	0.108729	0.108434	0.106738
GSK3A,GSK3B	GSK3.alpha.beta.M.V_GBL.9014954	0.654705357,0.646586048,0.629149216,0.615373843	0.636454	0.00881997	0.507223	0.68031	0.678578	0.5356	0.636877	0.527438	0.55001	0.669074	0.698619	0.662863	0.625604	0.648967	0.662243	0.544305	0.568201	0.37503	0.571012	0.664319	0.421301	0.531475	0.572001	0.551458	0.565244	0.626798	0.589062	0.649902	0.645351	0.696685	0.579815	0.575719	0.699307	0.625886	0.668539	0.354279	0.672935	0.606886	0.737036	0.637997	0.650537	0.704813	0.669089	0.737298	0.595018	0.670451	0.599121
GSK3A,GSK3B	GSK3alpha.beta_pS21_S9.R.V_GBL.9014876	0.440498677,0.468238896,0.420183551,0.428022346	0.439236	0.0105337	0.312688	0.45677	0.496451	0.308705	0.47079	0.366651	0.314952	0.49439	0.407242	0.498815	0.391092	0.439551	0.506769	0.380908	0.417677	0.320888	0.431564	0.38592	0.293768	0.375983	0.408059	0.352234	0.417126	0.427562	0.362825	0.483239	0.426114	0.4453	0.469187	0.360474	0.313978	0.467933	0.447492	0.313478	0.403511	0.421219	0.45969	0.447425	0.498252	0.39219	0.452141	0.482594	0.423801	0.438195	0.43816
IGF1R	IGF.1R.beta.R.C_GBL.9014883	0.215687773,0.214744491,0.215177947,0.210220434	0.213958	0.00126057	0.209883	0.180571	0.177795	0.170501	0.182812	0.291171	0.213325	0.287659	0.10393	0.216724	0.221135	0.229231	0.286277	0.218792	0.279414	0.252144	0.257	0.270213	0.161701	0.251442	0.315418	0.225072	0.225406	0.289236	0.229225	0.233064	0.196757	0.222929	0.247553	0.26099	0.200175	0.268961	0.255628	0.272802	0.221018	0.248334	0.205424	0.243811	0.243968	0.227278	0.245131	0.148916	0.2663	0.243358	0.24994
IGFBP2	IGFBP2.R.V_GBL.9014884	0.023163356,0.019060604,0.022905374,0.020720178	0.0214624	0.000970178	0.0181726	0.0199525	0.0213176	0.0243205	0.0196364	0.0277964	0.0206054	0.0220824	0.0223249	0.0232182	0.0233139	0.0204137	0.0248208	0.0188809	0.0213787	0.024939	0.0203203	0.0222542	0.023663	0.016986	0.0225657	0.0240249	0.0232528	0.0219863	0.0239031	0.0223695	0.0200943	0.0199666	0.0215939	0.0197663	0.0215027	0.0219859	0.0187639	0.0244132	0.0194223	0.0218871	0.019292	0.0244842	0.0198263	0.0186706	0.0211187	0.0233854	0.021044	0.018485	0.0221767
INPP4B	INPP4B.G.C_GBL.9014970	0.105655043,0.107874175,0.113726161,0.103055464	0.107578	0.00227374	0.108185	0.0957119	0.102147	0.0952296	0.107938	0.0989537	0.0890964	0.100939	0.0991436	0.0964874	0.100003	0.104312	0.101929	0.108632	0.102723	0.114361	0.111407	0.115283	0.111747	0.100042	0.109827	0.0949902	0.0962597	0.108056	0.125555	0.107722	0.0942659	0.0934937	0.103597	0.101369	0.107279	0.0994138	0.0917387	0.12589	0.102043	0.111754	0.0880481	0.0962637	0.110628	0.10099	0.100655	0.101574	0.107167	0.102929	0.105216
IRS1	IRS1.R.V_GBL.9014885	0.226032185,0.228380754,0.220080353,0.228702005	0.225799	0.00199688	0.165514	0.17244	0.176335	0.24074	0.17325	0.264492	0.231295	0.214281	0.177369	0.268363	0.191647	0.221575	0.218843	0.182265	0.184394	0.177808	0.177425	0.226824	0.201572	0.200893	0.177069	0.174015	0.172445	0.195014	0.256888	0.21779	0.213791	0.222404	0.225904	0.218829	0.298273	0.182439	0.174918	0.202291	0.199909	0.18629	0.204426	0.232431	0.271146	0.220302	0.16705	0.214853	0.18899	0.27712	0.265796
JUN	c.Jun_pS73.R.C_GBL.9014849	0.110137703,0.112241832,0.108626863,0.120411396	0.112854	0.00262577	0.165173	0.132135	0.13897	0.123434	0.144998	0.105161	0.126474	0.109239	0.135245	0.120592	0.130618	0.117651	0.113515	0.12925	0.125055	0.14085	0.117384	0.130358	0.13225	0.0957806	0.128484	0.140584	0.157598	0.15253	0.144356	0.160627	0.146147	0.110154	0.124008	0.128402	0.149945	0.142437	0.161798	0.11574	0.168131	0.118281	0.122798	0.128853	0.113471	0.143991	0.130742	0.122312	0.115215	0.125687	0.122695
KDR	VEGFR2.R.V_GBL.9014932	1.701701064,2.183400042,1.828847348,1.900477742	1.90361	0.101919	2.7526	2.14911	2.04454	1.79756	2.07758	1.71795	1.64526	1.99071	1.7096	1.95008	1.88753	2.58756	2.06349	1.80275	1.87538	1.90807	2.08768	1.44924	1.48124	2.08198	1.66271	1.38166	2.20907	1.8049	1.98961	1.92371	1.94549	1.98192	1.62078	1.87183	2.18313	1.79908	1.73905	2.41239	2.38592	2.06822	1.78801	2.15007	2.15046	1.78004	1.69775	3.02545	1.64826	2.55033	2.06355
KIT	c.Kit.R.V_GBL.9014850	0.004452491,0.002727403,0.003817123,0.002302834	0.00332496	0.000492897	0.00367009	0.0025025	0.00371291	0.00340124	0.00225189	0.0033601	0.0028265	0.00339718	0.00388913	0.00277899	0.0033543	0.00298326	0.00382494	0.00486006	0.00321176	0.0020618	0.00330178	0.00417227	0.00165632	0.00390305	0.00418236	0.00244262	0.00451499	0.00480819	0.00228899	0.00327881	0.00326003	0.00368695	0.00551661	0.00350016	0.00263123	0.00361903	0.00267686	0.00118463	0.00205999	0.00267227	0.00334685	0.00320558	0.00333204	0.00260207	0.00302482	0.00344863	0.00321148	0.00284924	0.0046285
LCK	Lck.R.V_GBL.9014887	0.067122496,0.067297025,0.061405951,0.064653157	0.0651197	0.00137724	0.0819608	0.0632559	0.0617715	0.0680496	0.0656156	0.0784563	0.0790804	0.0683436	0.0693553	0.0616031	0.0736741	0.0758799	0.0735745	0.0754178	0.0698936	0.0763597	0.071108	0.0605465	0.0738183	0.0621645	0.0685406	0.0544113	0.0727937	0.0620721	0.0628461	0.0686553	0.0638651	0.0648583	0.062498	0.0645179	0.07377	0.0665817	0.0611262	0.0572988	0.0637322	0.0719826	0.0865624	0.081315	0.0669298	0.0723188	0.0690525	0.0635968	0.0710109	0.0674521	0.0612519
MAP2K1	MEK1.R.V_GBL.9014890	0.621033686,0.644619846,0.592840971,0.63258612	0.62277	0.0110775	0.722198	0.691343	0.683331	0.565398	0.678836	0.577777	0.7332	0.614647	0.502049	0.618212	0.624201	0.670241	0.640358	0.676989	0.62521	0.695821	0.600181	0.593052	0.616555	0.679065	0.569573	0.486528	0.651434	0.603255	0.793227	0.65444	0.62645	0.656017	0.632764	0.574055	0.673032	0.561204	0.623229	0.767128	0.435184	0.625204	0.743274	0.506141	0.584879	0.584482	0.620348	0.738171	0.682346	0.717576	0.653272
MAP2K1	MEK1_pS217_S221.R.V_GBL.9014889	0.858955193,0.872696877,0.8782015,0.880218524	0.872518	0.0047922	0.832338	0.84378	0.850885	0.633005	0.81228	0.915143	0.564259	1.01791	0.93301	0.977915	0.903719	1.03087	1.05012	1.15355	1.04681	0.852847	0.997708	0.967461	0.8392	0.871731	0.921444	0.8479	1.19967	0.857497	0.675469	1.07363	0.927704	0.889338	0.930742	0.797991	0.798379	0.979161	0.971752	0.964948	0.827227	0.798551	0.999563	0.97084	1.00637	0.774192	0.852873	0.925114	1.0879	0.88637	0.889654
MAPK1,MAPK3	MAPK_pT202_Y204.R.V_GBL.9014888	0.196917093,0.194231118,0.18803649,0.19723147	0.194104	0.00213161	0.192568	0.18393	0.192144	0.118156	0.187146	0.169409	0.099334	0.265378	0.329435	0.193687	0.194446	0.186018	0.254705	0.200719	0.204899	0.163478	0.222565	0.213888	0.151932	0.245875	0.164129	0.221753	0.198193	0.22344	0.140692	0.221919	0.281077	0.219596	0.244355	0.166065	0.167716	0.18486	0.203516	0.210401	0.209524	0.194095	0.257996	0.254925	0.17622	0.152951	0.159652	0.214153	0.241921	0.152794	0.113625
MAPK14	p38_MAPK.R.C_GBL.9014902	0.834555407,0.875589547,0.922597149,0.988027492	0.905192	0.0329526	0.647531	0.921121	0.884127	0.974047	0.950026	0.876619	0.78116	0.826908	0.860061	0.947682	0.772978	0.975868	0.80699	0.962688	0.864972	0.549304	0.892331	0.412079	0.778703	0.795827	0.925128	0.893681	0.961664	0.95945	0.90222	0.878014	0.808287	0.885691	0.869612	0.819536	0.98619	0.932324	0.886286	0.976645	0.911065	0.832631	0.949458	0.954103	0.899167	0.944249	0.853573	0.844709	0.74624	0.862984	0.877729
MAPK14	p38_pT180_Y182.R.V_GBL.9014903	0.240911354,0.24029619,0.260963169,0.269763527	0.252984	0.00737083	0.158979	0.314856	0.296918	0.282616	0.286902	0.222158	0.232874	0.27702	0.334004	0.380454	0.222383	0.327867	0.265816	0.306226	0.311125	0.0958926	0.269585	0.062902	0.19332	0.239282	0.197266	0.308751	0.23004	0.306166	0.297575	0.285275	0.218722	0.300472	0.334424	0.225104	0.13078	0.314481	0.278562	0.340501	0.210939	0.284328	0.289728	0.152669	0.345899	0.20855	0.30173	0.202163	0.269559	0.178224	0.193054
MAPK9	JNK2.R.C_GBL.9014886	0.139003823,0.138722356,0.117559359,0.108245989	0.125883	0.00773171	0.1238	0.106089	0.130374	0.124846	0.108561	0.129963	0.133151	0.123931	0.098045	0.122469	0.0953925	0.108233	0.131059	0.109522	0.10092	0.0740504	0.105497	0.0990576	0.0965413	0.126379	0.102695	0.139672	0.0828099	0.113754	0.142525	0.10521	0.121864	0.117751	0.114672	0.118825	0.0898629	0.117277	0.171079	0.131912	0.118922	0.108749	0.130307	0.0964819	0.104092	0.126332	0.140847	0.107882	0.103017	0.157434	0.11999
MAPT	Tau.M.C_GBL.9014968	0.091532594,0.088008581,0.081867355,0.090453374	0.0879655	0.00216223	0.135512	0.127437	0.114912	0.0605615	0.113162	0.156337	0.160572	0.119924	0.10962	0.169358	0.0831113	0.0672329	0.0786639	0.144198	0.131332	0.105937	0.137859	0.196396	0.126833	0.0641304	0.16529	0.16654	0.156656	0.113831	0.126073	0.102982	0.167392	0.141204	0.150083	0.122273	0.207975	0.124271	0.180925	0.149262	0.0679541	0.123602	0.101502	0.149853	0.144157	0.0499422	0.12457	0.115616	0.127281	0.199004	0.130794
MET	c.Met.M.C_GBL.9014985	0.091457196,0.094526438,0.092400248,0.099711896	0.0945239	0.00184458	0.086899	0.0933863	0.104186	0.0803092	0.101267	0.0816765	0.079633	0.0967198	0.0768639	0.089954	0.138499	0.0874558	0.0899398	0.0933244	0.100493	0.101478	0.0952616	0.0888383	0.0945956	0.0881041	0.0872084	0.101326	0.0897662	0.0907779	0.0953168	0.0884546	0.0990999	0.0832419	0.104901	0.0964197	0.0879446	0.0987064	0.104119	0.099133	0.119414	0.10648	0.131293	0.101834	0.0931677	0.0896139	0.102241	0.0888228	0.0919144	0.125428	0.0979237
MET	c.Met_pY1235.R.C_GBL.9014852	0.148095892,0.146250763,0.153919787,0.148502986	0.149192	0.00165023	0.116067	0.164697	0.175708	0.152076	0.151582	0.110349	0.100425	0.143582	0.123011	0.151603	0.124999	0.148004	0.143578	0.12208	0.158076	0.157091	0.149406	0.123378	0.102924	0.16059	0.127069	0.0968528	0.158606	0.171443	0.153476	0.156541	0.269302	0.142684	0.186402	0.139788	0.104657	0.126198	0.133871	0.118545	0.167997	0.137064	0.16731	0.112105	0.166087	0.128752	0.102193	0.125966	0.172686	0.13736	0.152121
MRE11A	Mre11.R.C_GBL.9014891	0.128838437,0.138563754,0.132226713,0.134188719	0.133454	0.00203017	0.145683	0.163881	0.145898	0.136285	0.152474	0.153151	0.16235	0.142484	0.133569	0.155925	0.139247	0.15043	0.138961	0.149102	0.138629	0.155423	0.133887	0.129658	0.132206	0.143307	0.134057	0.147612	0.1395	0.14132	0.1469	0.133854	0.149214	0.130254	0.14239	0.144139	0.155961	0.128218	0.146143	0.14275	0.153257	0.142196	0.144832	0.144032	0.142487	0.147242	0.124212	0.141522	0.146446	0.170432	0.155433
MSH2	MSH2.M.C_GBL.9014958	0.161952465,0.178035889,0.177645025,0.186075611	0.175927	0.00504712	0.185487	0.162736	0.173925	0.120631	0.154362	0.174772	0.1604	0.148594	0.141971	0.154886	0.155716	0.156028	0.154995	0.154711	0.16986	0.190117	0.183135	0.120982	0.1843	0.190997	0.184255	0.143516	0.205293	0.174333	0.151769	0.161914	0.13937	0.147853	0.163963	0.171445	0.133269	0.206913	0.194458	0.149934	0.188304	0.170645	0.192659	0.137581	0.18959	0.150736	0.170542	0.184838	0.195286	0.152298	0.161306
MSH6	MSH6.R.C_GBL.9014892	0.890139241,0.870851542,0.827431481,0.846402089	0.858706	0.0137388	0.807395	0.813974	0.833937	0.573871	0.844209	0.875989	0.845836	0.816487	0.73396	0.842828	0.830097	0.833473	0.796738	0.745504	0.744381	0.836519	0.795917	0.625852	0.715245	0.93245	0.779703	0.866747	0.851723	0.810338	0.8281	0.753095	0.711787	0.796682	0.796497	0.763691	0.607284	0.945889	0.903607	0.678095	0.950255	0.744512	0.97761	0.660244	0.835882	0.897204	0.730105	0.894203	0.89938	0.791026	0.716746
MYC	c.Myc.R.C_GBL.9014853	0.330860547,0.320873599,0.332704885,0.323538429	0.326994	0.0028426	0.392365	0.277212	0.268187	0.242732	0.22877	0.301473	0.272311	0.315933	0.199702	0.279687	0.332315	0.304971	0.3135	0.222099	0.310344	0.230475	0.280151	0.230478	0.219608	0.352926	0.232296	0.282663	0.312153	0.357902	0.270078	0.31243	0.359639	0.306487	0.282686	0.224517	0.199721	0.279963	0.284992	0.193232	0.300849	0.246711	0.29091	0.306015	0.294301	0.354498	0.339852	0.265517	0.278545	0.209585	0.233418
NCOA3	AIB1.M.V_GBL.9014940	0.292722264,0.316151647,0.296882655,0.294839165	0.300149	0.00540142	0.283922	0.342988	0.303126	0.333664	0.313832	0.355182	0.413792	0.327787	0.309855	0.32573	0.327557	0.241737	0.307154	0.272087	0.324593	0.280841	0.302341	0.37799	0.371203	0.281851	0.322159	0.321314	0.341328	0.333863	0.318048	0.273533	0.36598	0.284567	0.305067	0.34082	0.373417	0.338716	0.340359	0.306022	0.313442	0.304909	0.34009	0.352514	0.296837	0.318781	0.313299	0.334088	0.292379	0.343533	0.353994
NF2	NF2.R.C_GBL.9014894	0.096517827,0.092045212,0.089900232,0.093767932	0.0930578	0.00139856	0.0878541	0.0944284	0.0818684	0.0823683	0.0849737	0.0927888	0.0843185	0.092386	0.0833677	0.0788908	0.0858837	0.0780685	0.0883645	0.0913343	0.0866655	0.086248	0.0930039	0.0827941	0.090254	0.0782211	0.0855658	0.0815329	0.0821899	0.0905104	0.0888328	0.0925924	0.0828137	0.0962505	0.0877386	0.0859177	0.083986	0.0843613	0.0871544	0.0861151	0.0860477	0.0858834	0.0815427	0.0840275	0.0879869	0.0892267	0.0875375	0.0881833	0.087815	0.0919376	0.0936116
NFKB1	NF.kB.p65_pS536.R.C_GBL.9014895	0.274620906,0.278053271,0.283644921,0.298231736	0.283638	0.00520796	0.269635	0.286305	0.278311	0.439997	0.282009	0.406878	0.343931	0.285691	0.266429	0.253859	0.266687	0.169379	0.26022	0.326589	0.282206	0.243774	0.271277	0.210811	0.277338	0.308301	0.339504	0.28102	0.277855	0.311915	0.249247	0.275328	0.355322	0.321954	0.329962	0.279513	0.277954	0.214044	0.233621	0.387624	0.261146	0.34616	0.297023	0.324319	0.240284	0.263566	0.250767	0.234404	0.308894	0.283449	0.269636
NOTCH1	Notch1.R.V_GBL.9014896	0.171711042,0.171323028,0.177322694,0.188084219	0.17711	0.00390637	0.187618	0.220909	0.217037	0.198687	0.230841	0.166204	0.190225	0.168318	0.173636	0.15077	0.230163	0.144646	0.180891	0.228025	0.202587	0.254445	0.174347	0.189447	0.211058	0.182833	0.26645	0.191295	0.210865	0.191396	0.132608	0.169353	0.158413	0.178519	0.184326	0.216921	0.158319	0.165882	0.154635	0.177228	0.14738	0.202454	0.196018	0.169518	0.153639	0.184793	0.132235	0.171165	0.21584	0.156318	0.195689
NOTCH3	Notch3.R.C_GBL.9014897	0.104541204,0.107066619,0.085885301,0.095043035	0.098134	0.00483415	0.0901606	0.0940814	0.0948944	0.0939952	0.102571	0.0812796	0.0895126	0.085982	0.109905	0.0900006	0.0876267	0.0845246	0.0830381	0.0890634	0.0930683	0.0904168	0.0936416	0.0882662	0.0857701	0.0931819	0.103271	0.10661	0.091313	0.0935368	0.0943117	0.107227	0.0796922	0.0829578	0.11858	0.107732	0.0833799	0.104512	0.0826601	0.103373	0.0921159	0.0896549	0.0825835	0.0833211	0.0824859	0.085483	0.0754696	0.0941363	0.0889818	0.0869716	0.12899
PARK7	DJ.1.R.C_GBL.9014860	0.900306437,1.015919751,0.951236528,1.049634856	0.979274	0.0333111	1.20766	1.10424	1.09405	1.09455	1.09766	1.06159	1.0434	1.01607	1.1214	0.990674	1.18167	1.05217	1.07786	1.05502	1.13965	1.10913	1.07613	1.25788	0.929887	0.927072	0.948823	1.1029	1.23736	1.02621	0.852366	0.955014	1.09229	1.02745	1.06892	1.04172	1.20204	1.07123	0.984042	1.2596	1.05773	1.18959	1.01406	0.996157	1.0288	1.03904	1.06191	1.15864	1.06243	1.08265	1.13785
PARP1	PARP_cleaved.M.C_GBL.9014960	0.049381835,0.050127075,0.05241287,0.049582612	0.0503761	0.000696936	0.0658571	0.0458467	0.0454266	0.0472099	0.0481837	0.0501309	0.048882	0.0491738	0.0480686	0.0488902	0.0490441	0.0447704	0.0324881	0.0481847	0.0423651	0.045815	0.0462861	0.0499727	0.0502208	0.0431075	0.0478075	0.0464538	0.0475657	0.0567538	0.0476085	0.0496878	0.0494554	0.0497047	0.0487682	0.0463346	0.0536879	0.0496898	0.0470806	0.0517769	0.0493803	0.0505644	0.0507177	0.0463171	0.0519847	0.0472142	0.0450159	0.048141	0.0479503	0.0486116	0.0551113
PCNA	PCNA.M.V_GBL.9014961	0.637129181,0.654724629,0.670614557,0.52548675	0.621989	0.0328861	0.526509	0.451406	0.504854	0.587859	0.515682	0.529365	0.516838	0.532089	0.525003	0.588293	0.513786	0.483031	0.577983	0.47247	0.456958	0.535208	0.46739	0.444712	0.478779	0.586258	0.431881	0.488737	0.516879	0.498077	0.489049	0.464861	0.510161	0.709454	0.471633	0.502071	0.429247	0.569706	0.507386	0.492956	0.555561	0.471532	0.65047	0.461059	0.522715	0.54027	0.568253	0.532655	0.511764	0.446727	0.454069
PDK1	PDK1_pS241.R.V_GBL.9014910	0.133974265,0.142094559,0.142689869,0.157169924	0.143982	0.00482449	0.163263	0.159235	0.154921	0.131206	0.159799	0.152953	0.111068	0.152115	0.1752	0.148623	0.150481	0.140413	0.151016	0.138139	0.147124	0.148982	0.137822	0.240932	0.16866	0.139744	0.132898	0.119632	0.161973	0.169965	0.113443	0.144405	0.183933	0.14656	0.158917	0.179331	0.147408	0.199452	0.22643	0.156438	0.236819	0.169217	0.139541	0.15484	0.152995	0.153578	0.181417	0.158526	0.167932	0.240037	0.160394
PEA15	Pea.15.R.V_GBL.9014911	0.212381107,0.20731185,0.181751811,0.185062181	0.196627	0.00773183	0.254784	0.194414	0.201367	0.205944	0.207004	0.173463	0.202093	0.221459	0.235656	0.210324	0.212757	0.218575	0.234673	0.184079	0.167409	0.171174	0.198663	0.213559	0.1965	0.243334	0.203887	0.193041	0.197596	0.186483	0.203229	0.212415	0.245561	0.234475	0.22039	0.207373	0.215152	0.194858	0.170724	0.248662	0.212681	0.221641	0.226191	0.225994	0.208086	0.196873	0.220377	0.22577	0.181752	0.21977	0.198312
PECAM1	CD31.M.V_GBL.9014946	0.057204765,0.054480674,0.056177411,0.057970232	0.0564583	0.0007546	0.057721	0.0508169	0.0548309	0.0509375	0.0639883	0.0559779	0.0519889	0.0540747	0.0551126	0.0537448	0.0526756	0.0628868	0.0547807	0.0567748	0.0547571	0.0605821	0.0555309	0.0536855	0.0608355	0.0565471	0.0672052	0.0604862	0.0599558	0.0628415	0.058767	0.0556948	0.0545767	0.0567666	0.0579737	0.0585826	0.0585946	0.0573406	0.0587797	0.0617371	0.0625925	0.0625268	0.0526996	0.0518384	0.0584334	0.0539054	0.0602476	0.0565043	0.0633338	0.0586428	0.0623842
PGR	PR.R.V_GBL.9014916	0.002304654,0.002375898,0.002522082,0.001060732	0.00206584	0.000338079	0.003906	0.00246358	0.00309355	0.0029729	0.00193681	0.00291565	0.00576993	0.00261412	0.00307414	0.00261794	0.00319919	0.00291173	0.0029802	0.0031837	0.00309821	0.00138862	0.00109116	0.00527696	0.00120027	0.00288232	0.00106562	0.00444237	0.00250309	0.00245603	0.0010125	0.00175471	0.00545088	0.00330404	0.00294127	0.00250242	0.00234924	0.00367256	0.00496914	0.00165304	0.00100741	0.00268074	0.00249829	0.00313578	0.00230115	0.000797755	0.00455566	0.00322543	0.00194584	0.00518013	0.00379848
PIK3CA	PI3K.p110.alpha.R.C_GBL.9014912	0.227709078,0.199501158,0.223686161,0.208688356	0.214896	0.00656365	0.190179	0.193736	0.192996	0.272286	0.191451	0.194676	0.148279	0.19778	0.203112	0.186592	0.219573	0.17106	0.193872	0.186898	0.2148	0.147635	0.19042	0.199711	0.213912	0.222106	0.171263	0.177437	0.194523	0.233431	0.176042	0.167442	0.195182	0.198666	0.203941	0.196848	0.175161	0.196841	0.173599	0.191059	0.164075	0.206466	0.197493	0.194795	0.209866	0.203096	0.166599	0.202737	0.203981	0.170691	0.1973
PIK3R1	PI3K.p85.R.V_GBL.9014913	0.857557023,0.864724073,0.816874005,0.863982412	0.850784	0.0114174	0.976054	0.893132	0.825691	0.906033	0.912043	0.853349	0.809871	0.819525	1.12245	0.840253	1.0017	0.861595	0.844839	0.850887	0.75943	0.719614	0.888832	1.01522	0.920945	0.901777	0.811799	0.769901	0.945936	0.948373	0.750697	0.843132	0.775806	0.873304	0.950304	0.935871	0.783885	1.0099	0.783132	1.04988	0.77936	0.893538	0.737737	0.775774	0.829187	0.860811	0.839539	0.84766	0.869987	0.725725	1.02304
PRKAA1	AMPK.alpha.R.C_GBL.9014828	0.443617399,0.380153797,0.374399777,0.360572319	0.389686	0.0184407	0.386686	0.340234	0.331628	0.390782	0.34374	0.323003	0.317366	0.379409	0.443209	0.354897	0.391874	0.354055	0.349219	0.378688	0.363261	0.337492	0.377933	0.377194	0.386145	0.347396	0.421144	0.385982	0.394729	0.460533	0.433716	0.433418	0.354849	0.365083	0.459671	0.439224	0.357521	0.397892	0.274506	0.392082	0.378337	0.397136	0.339322	0.340735	0.324973	0.370094	0.375426	0.388056	0.388588	0.361932	0.483929
PRKAA1	AMPK_pT172.R.V_GBL.9014829	1.076328691,1.144022888,1.11188734,1.11382217	1.11152	0.0138453	1.12068	1.46711	1.5314	0.879454	1.47901	0.94798	0.980654	0.967485	0.995239	1.00302	1.42624	0.967319	0.967729	1.15985	1.12222	0.999392	1.26797	0.873434	1.10476	0.779382	1.11151	1.26997	1.07032	1.24618	1.56186	1.09394	1.15857	0.98793	1.41224	1.33198	1.08557	0.821618	0.813804	1.22351	1.10312	0.93114	1.01943	0.954881	0.889271	1.19409	1.22991	1.18653	1.1479	1.21565	1.23367
PRKCA	PKC.alpha.M.V_GBL.9014962	0.650597665,0.624572145,0.617866347,0.581664124	0.618675	0.0142135	0.486744	0.657413	0.626733	0.738457	0.604657	0.632212	0.633587	0.648676	0.620131	0.653894	0.713628	0.394383	0.617756	0.595727	0.659855	0.641056	0.569451	0.998238	0.64012	0.500555	0.527566	0.501263	0.656732	0.54387	0.55314	0.619576	0.568136	0.666716	0.634038	0.652976	0.660306	0.616952	0.531758	0.570221	0.562347	0.534426	0.62384	0.649101	0.606036	0.672622	0.501929	0.590242	0.640671	0.54242	0.604241
PRKCA	PKC.alpha_pS657.R.V_GBL.9014914	0.377691906,0.368984672,0.379864285,0.358468062	0.371252	0.00486667	0.289992	0.386488	0.372499	0.406661	0.386278	0.386753	0.340311	0.414293	0.360541	0.368008	0.402379	0.236689	0.370366	0.336889	0.39912	0.396094	0.354071	0.562553	0.393638	0.29944	0.326027	0.274594	0.399579	0.360529	0.314088	0.376051	0.328856	0.36845	0.415421	0.375835	0.357813	0.357259	0.316967	0.304725	0.32335	0.299642	0.345924	0.365219	0.372291	0.373014	0.271128	0.31561	0.38681	0.322175	0.373786
PTCH1	PTCH.R.C_GBL.9014917	0.412244029,0.424526841,0.418520046,0.442372934	0.424416	0.00648963	0.380577	0.473325	0.487264	0.461331	0.479226	0.360536	0.381129	0.404631	0.453104	0.421882	0.411431	0.338959	0.434178	0.452434	0.4867	0.556212	0.479848	0.51118	0.487179	0.417547	0.510886	0.418241	0.289011	0.418023	0.457604	0.451736	0.477265	0.407295	0.497338	0.489068	0.333474	0.481445	0.47446	0.416182	0.499729	0.42832	0.443676	0.341062	0.425422	0.414182	0.37235	0.259669	0.414653	0.43307	0.376
PTEN	PTEN.R.V_GBL.9014918	0.927403245,1.045994227,0.939384392,0.975837946	0.972155	0.0266809	1.10015	1.25179	1.22553	1.11035	1.20832	1.22922	1.18594	1.09326	1.05768	1.1551	1.18837	1.19838	1.18603	1.22643	1.15466	1.23093	1.18201	1.42453	1.06451	1.09779	1.37681	1.30075	1.32277	1.02577	1.13867	1.03309	0.94461	0.999901	1.03916	1.14979	1.24773	0.885082	0.905579	1.29871	1.16513	1.26931	1.19471	1.23515	1.09907	1.18934	1.30763	1.36819	1.13661	1.75715	1.4857
PTGS2	COX.2.R.C_GBL.9014979	0.111753783,0.096641057,0.100720693,0.09606849	0.101296	0.00363652	0.0944176	0.134979	0.118399	0.100272	0.125236	0.0965631	0.156786	0.123679	0.0819521	0.096531	0.0864854	0.0737185	0.108888	0.11285	0.0978742	0.0893287	0.0808891	0.0989218	0.0861963	0.0789013	0.0729102	0.102553	0.0936564	0.0870396	0.0748308	0.0842721	0.113409	0.102608	0.0880833	0.0805337	0.0967021	0.0859671	0.0912207	0.106365	0.101249	0.107571	0.0912684	0.127789	0.0786389	0.0898646	0.0932799	0.101328	0.122198	0.151691	0.132435
PTK2	FAK.pY397_GBL.9014963	0.113374635,0.113453988,0.109792988,0.106162404	0.110696	0.00173567	0.099862	0.118641	0.124432	0.0723716	0.116333	0.112339	0.100096	0.128303	0.118602	0.143092	0.124068	0.117153	0.11723	0.134177	0.14209	0.121249	0.128396	0.081999	0.118593	0.0909238	0.118525	0.138596	0.110436	0.116536	0.156827	0.095441	0.121305	0.123943	0.130284	0.128797	0.134992	0.112172	0.131027	0.118125	0.130708	0.110147	0.117898	0.136499	0.11383	0.129913	0.125696	0.105116	0.169925	0.143891	0.116522
PTK2	FAK.R.C_GBL.9014871	0.720053124,0.702514214,0.69674807,0.682975972	0.700573	0.00767859	0.714467	0.67497	0.750446	0.569873	0.704842	0.719073	0.685472	0.844643	0.823149	0.745835	0.764911	0.690261	0.844468	0.819346	0.83602	0.710957	0.717429	0.888426	0.828554	0.620911	0.733536	0.830762	0.675088	0.715239	0.860235	0.412062	0.690655	0.762164	0.516031	0.787545	0.687036	0.790364	0.705307	0.854963	0.618837	0.657397	0.770427	0.702716	0.685553	0.709466	0.788206	0.653872	0.791143	0.691178	0.696393
PXN	Paxillin.R.V_GBL.9014908	0.773439994,0.755591866,0.792100636,0.841544888	0.790669	0.018524	0.788034	0.832248	0.757207	0.847974	0.764695	0.591117	0.72146	0.857386	0.870809	0.803047	0.897059	0.537146	0.830929	0.801489	0.811185	0.6796	0.667041	0.65207	0.794631	0.673684	0.752299	0.769423	0.649677	0.797587	0.824245	0.870849	0.895583	0.792646	0.621109	0.828364	0.83932	0.721684	0.688911	0.696607	0.736448	0.841803	0.832615	0.961443	0.77594	0.772921	0.853925	0.731401	0.756891	0.580234	0.589481
RAB25	Rab25.R.C_GBL.9014919	0.048086688,0.049658585,0.050676613,0.056104896	0.0511317	0.00174121	0.0529197	0.0530042	0.0535714	0.0481985	0.0544725	0.0552757	0.0532015	0.0495012	0.0556985	0.0532993	0.0554793	0.052644	0.0496379	0.0580821	0.0576111	0.0593402	0.0523065	0.0469074	0.0555748	0.0490494	0.0526873	0.0579856	0.0501715	0.0562183	0.055856	0.0494805	0.0451923	0.0458012	0.0523147	0.0554959	0.0534205	0.0562044	0.0527835	0.0530092	0.0536564	0.0549334	0.0500159	0.0522411	0.0534835	0.0566993	0.0510738	0.0531124	0.05266	0.0505056	0.0544189
RAD50	Rad50.M.C_GBL.9014944	0.278327697,0.274162138,0.278767176,0.275779261	0.276759	0.0010877	0.267926	0.279321	0.268099	0.283808	0.272268	0.283413	0.266189	0.285666	0.265261	0.288761	0.276345	0.269285	0.267451	0.277927	0.272322	0.304551	0.273461	0.283641	0.275466	0.274803	0.283831	0.27421	0.30163	0.289016	0.270161	0.257513	0.281107	0.283267	0.276445	0.287361	0.287812	0.292146	0.293047	0.273077	0.302463	0.274636	0.282579	0.26927	0.302015	0.267603	0.275656	0.27825	0.297518	0.302249	0.282766
RAD51	Rad51.M.C_GBL.9014959	0.063627834,0.064763946,0.057539811,0.049996855	0.0589821	0.00338904	0.050622	0.0439354	0.0525562	0.0327673	0.057479	0.0539146	0.039243	0.0458241	0.0443522	0.0613058	0.0357192	0.0380391	0.0427331	0.0361683	0.0343374	0.052294	0.0518908	0.0258213	0.0371132	0.0580863	0.0352514	0.0480042	0.0443513	0.0440037	0.0472656	0.0461925	0.0310036	0.064604	0.0451119	0.0455164	0.0243562	0.0456873	0.0554333	0.0361229	0.0559199	0.0500105	0.062806	0.0353128	0.0559631	0.0636501	0.0413897	0.0509509	0.046589	0.0449117	0.0374782
RAD51	Rad51.M.C_GBL.9014988	0.036497987,0.036741532,0.036372537,0.027607117	0.0343048	0.00223387	0.0220373	0.0317991	0.0275471	0.0243214	0.0287526	0.0290198	0.0279133	0.0265086	0.0301525	0.0363124	0.0279038	0.0295832	0.0225079	0.0264733	0.0213206	0.0273643	0.0268197	0.0161178	0.0220922	0.0333079	0.0242467	0.0272404	0.0307389	0.0265119	0.0244904	0.0282283	0.0305331	0.040291	0.02641	0.0256801	0.0219424	0.0309111	0.0358292	0.0192964	0.0335084	0.0274691	0.0411549	0.0231532	0.032112	0.0299166	0.0243113	0.0293262	0.0257166	0.0268353	0.0226449
RAF1	C.Raf.R.V_GBL.9014857	0.424765056,0.389809341,0.406921916,0.358654524	0.395038	0.0140713	0.373656	0.342829	0.356494	0.401037	0.354948	0.427328	0.397716	0.397784	0.35741	0.363825	0.357087	0.303316	0.369366	0.376816	0.366575	0.401529	0.362922	0.282719	0.388596	0.398812	0.372348	0.357185	0.349465	0.391689	0.434941	0.351179	0.339521	0.362091	0.355139	0.292749	0.305574	0.37284	0.360949	0.336837	0.342615	0.349425	0.430356	0.280238	0.360294	0.39012	0.206344	0.334257	0.377188	0.290911	0.30144
RAF1	C.Raf_pS338.R.C_GBL.9014856	0.126967255,0.142054706,0.140653989,0.175622289	0.146325	0.0103419	0.142401	0.143394	0.14056	0.147683	0.142681	0.157723	0.133591	0.15091	0.157389	0.145814	0.140974	0.148334	0.158032	0.161748	0.166024	0.140321	0.159067	0.155762	0.167868	0.127424	0.15593	0.142566	0.177681	0.151974	0.142593	0.161915	0.154097	0.14056	0.148128	0.139965	0.1325	0.153656	0.154284	0.133625	0.139438	0.157281	0.147849	0.139151	0.151056	0.15898	0.100887	0.157409	0.173429	0.122809	0.140559
RB1	Rb.M.V_GBL.9014952	0.152173072,0.173521591,0.152715199,0.162251701	0.160165	0.00501766	0.159386	0.153789	0.158122	0.138824	0.1385	0.164871	0.162558	0.153666	0.14581	0.150443	0.152373	0.146593	0.13822	0.145633	0.149852	0.181899	0.156646	0.142534	0.154331	0.164994	0.146323	0.177565	0.158023	0.14999	0.15238	0.1297	0.149302	0.160241	0.150478	0.140986	0.1442	0.166468	0.193691	0.143825	0.166636	0.15251	0.175116	0.148418	0.140207	0.159054	0.163628	0.152216	0.166184	0.134934	0.145649
RB1	Rb_pS807_S811.R.V_GBL.9014920	0.907811115,1.045268657,0.974598332,0.996619405	0.981074	0.0285365	0.862109	0.906725	0.917602	0.507542	0.86718	0.893252	0.730271	0.762172	0.857646	0.906142	0.869879	0.92464	0.80717	0.819868	0.812588	1.18362	0.979127	0.605931	0.921629	1.09111	1.01233	0.861716	1.0661	0.972916	0.709856	0.84547	0.741507	0.987118	0.829218	0.748335	0.480514	1.20947	0.991456	0.672386	1.02454	0.71071	1.24411	0.748855	0.903227	0.974601	1.02049	0.94655	1.04937	0.673002	0.775624
RPS6	S6_pS235_S236.R.V_GBL.9014921	0.140309963,0.12667264,0.133547298,0.132766774	0.133324	0.00278993	0.113702	0.140953	0.124446	0.176345	0.120501	0.154834	0.131227	0.156933	0.105039	0.284221	0.119937	0.286716	0.170536	0.150746	0.161854	0.106157	0.137563	0.145722	0.088231	0.10936	0.197883	0.189781	0.129547	0.160658	0.146997	0.165793	0.283069	0.154906	0.161086	0.134332	0.15812	0.144797	0.184276	0.126952	0.168195	0.131626	0.160326	0.193411	0.26776	0.151842	0.222528	0.157891	0.135387	0.302621	0.232944
RPS6	S6_pS240_S244.R.V_GBL.9014922	0.084182993,0.080527556,0.093253775,0.086987392	0.0862379	0.00268662	0.0697931	0.0878051	0.0779294	0.0891427	0.080481	0.094589	0.0780139	0.106737	0.074712	0.169635	0.0671146	0.166192	0.102219	0.099674	0.104305	0.0785227	0.0950077	0.06846	0.0728086	0.0669245	0.113112	0.103455	0.0900805	0.0941723	0.0804089	0.0980924	0.119644	0.102909	0.0936386	0.0810565	0.0836937	0.0784938	0.0898057	0.0598506	0.0926522	0.0914697	0.0868163	0.137997	0.147237	0.107296	0.111531	0.0891703	0.0834066	0.158866	0.126395
RPS6KA1	p90RSK_pT359_S363.R.C_GBL.9014907	0.262695161,0.258536582,0.271827163,0.238109049	0.257792	0.0071239	0.236498	0.240773	0.23072	0.19479	0.228157	0.226287	0.235574	0.218881	0.215607	0.254355	0.240811	0.21906	0.224852	0.251404	0.235322	0.278751	0.235892	0.17798	0.243791	0.266447	0.236073	0.230006	0.235038	0.221108	0.204901	0.230956	0.215376	0.280548	0.275609	0.216569	0.200102	0.279518	0.200136	0.218174	0.19729	0.226485	0.273927	0.260355	0.249717	0.241861	0.294151	0.207251	0.297538	0.204072	0.213192
RPS6KB1	p70S6K.R.V_GBL.9014906	0.389521242,0.373519873,0.338858185,0.354992138	0.364223	0.0110114	0.353635	0.292363	0.283388	0.384127	0.27644	0.393486	0.283583	0.365927	0.348757	0.342433	0.367467	0.359582	0.349435	0.357203	0.360598	0.297004	0.349662	0.352771	0.332626	0.389511	0.33699	0.341071	0.381675	0.39635	0.135409	0.311633	0.361875	0.359114	0.297954	0.344965	0.305224	0.366952	0.334431	0.353047	0.312552	0.401746	0.237235	0.342248	0.401538	0.361184	0.456258	0.437415	0.371393	0.411079	0.424581
RPS6KB1	p70S6K_pT389.R.V_GBL.9014905	0.43009697,0.429109249,0.433563475,0.443868412	0.43416	0.00337426	0.416131	0.357186	0.352108	0.418327	0.333522	0.46771	0.350414	0.447847	0.379781	0.462081	0.385518	0.499724	0.449426	0.407614	0.420791	0.369314	0.440504	0.332452	0.393888	0.444011	0.490376	0.423061	0.452669	0.482534	0.184957	0.372203	0.421948	0.45725	0.364417	0.433198	0.325497	0.469564	0.436809	0.409924	0.370658	0.477094	0.273655	0.421016	0.526639	0.465903	0.558412	0.515379	0.48595	0.516227	0.523007
SMAD1	Smad1.R.V_GBL.9014923	0.264791874,0.267658516,0.282563419,0.238980452	0.263499	0.00905347	0.253451	0.2362	0.235388	0.254137	0.235567	0.227661	0.26811	0.222267	0.252658	0.222969	0.247379	0.20324	0.220842	0.258254	0.253046	0.263588	0.232721	0.266068	0.255554	0.233342	0.237575	0.259431	0.250377	0.222203	0.227069	0.232828	0.218423	0.280626	0.222597	0.234035	0.232633	0.241161	0.271587	0.257958	0.225733	0.240455	0.28247	0.250449	0.216346	0.251753	0.218452	0.227849	0.222004	0.242574	0.230389
SMAD3	Smad3.R.V_GBL.9014924	0.260033773,0.231513175,0.236143091,0.234728328	0.240605	0.00654843	0.182597	0.217347	0.198967	0.216693	0.244359	0.252456	0.203198	0.227621	0.214193	0.230676	0.250351	0.193393	0.219998	0.234589	0.201743	0.210823	0.208368	0.300204	0.188584	0.192405	0.201715	0.262568	0.188406	0.22966	0.240022	0.198352	0.170199	0.235958	0.202025	0.173941	0.249751	0.201588	0.207315	0.237623	0.208651	0.218819	0.156017	0.208457	0.214609	0.253655	0.193107	0.231662	0.205701	0.171682	0.181074
SMAD4	Smad4.M.V_GBL.9014964	0.155034318,0.167643415,0.163997214,0.170335165	0.164253	0.00333588	0.147379	0.151196	0.161189	0.174781	0.174286	0.169301	0.168456	0.157997	0.170358	0.144755	0.188853	0.160327	0.159028	0.16958	0.159653	0.166427	0.170661	0.169828	0.156978	0.160099	0.164118	0.165884	0.181468	0.161749	0.171338	0.169099	0.160906	0.174135	0.169069	0.161457	0.164825	0.1557	0.162248	0.166325	0.16577	0.166896	0.172729	0.16792	0.154816	0.154431	0.150338	0.168877	0.17214	0.167452	0.160742
SNAI2	Snail.M.C_GBL.9014965	0.030076742,0.038549798,0.024173773,0.033452665	0.0315632	0.00301656	0.0446009	0.0323753	0.0321779	0.035549	0.0412489	0.0455769	0.0370077	0.0354177	0.0347965	0.0314337	0.0340159	0.0406128	0.0376148	0.0337361	0.0381875	0.0317782	0.033956	0.0380019	0.0315622	0.0435639	0.0342211	0.0359676	0.0325631	0.0317216	0.03613	0.0387628	0.0361003	0.0298224	0.0356148	0.0390156	0.0434544	0.0344263	0.0459666	0.0390699	0.0458246	0.0474146	0.0287443	0.0332425	0.036336	0.033765	0.0333749	0.037429	0.0367553	0.0476917	0.0357602
SRC	Src.M.V_GBL.9014966	0.051833394,0.049330646,0.05532017,0.059214999	0.0539248	0.0021489	0.0635178	0.0425151	0.0501777	0.0428833	0.0531525	0.0518924	0.0457066	0.0456488	0.054962	0.0504682	0.0553203	0.0580956	0.0522106	0.0591896	0.0551009	0.0651999	0.0534375	0.0584908	0.0698478	0.0572963	0.0741979	0.0533864	0.0628486	0.0701184	0.0382222	0.0573797	0.0581598	0.0474781	0.0675584	0.0513912	0.0603087	0.0524058	0.0619175	0.045077	0.0546431	0.0577667	0.0344996	0.0446761	0.0534794	0.0473953	0.0446251	0.0547986	0.0554424	0.0633327	0.0619722
SRC	Src_pY416.R.C_GBL.9014925	0.135635804,0.12140499,0.137904109,0.134658549	0.132401	0.00372779	0.103816	0.127815	0.127033	0.135002	0.121845	0.119042	0.137108	0.125295	0.122123	0.107414	0.128063	0.114697	0.126723	0.150475	0.13647	0.138597	0.125903	0.120325	0.14863	0.124108	0.13817	0.137421	0.126433	0.11964	0.122127	0.116398	0.119696	0.115888	0.116249	0.123204	0.140704	0.113122	0.110138	0.134202	0.108852	0.129227	0.104816	0.140869	0.0993442	0.130304	0.119478	0.139897	0.128287	0.136801	0.129788
SRC	Src_pY527.R.V_GBL.9014926	0.570341473,0.533248998,0.641644907,0.717346004	0.615645	0.0406823	0.601521	0.590114	0.622465	0.481387	0.638331	0.471377	0.38462	0.521627	0.581615	0.529237	0.586958	0.615043	0.545353	0.595341	0.704973	0.683034	0.608759	0.356929	0.665916	0.623811	0.579079	0.515445	0.619975	0.665033	0.380633	0.664219	0.509473	0.487955	0.48394	0.470615	0.444283	0.524023	0.490461	0.391879	0.42777	0.588198	0.491615	0.594981	0.538934	0.580478	0.297284	0.525215	0.65911	0.503824	0.55256
STAT3	STAT3_pY705.R.V_GBL.9014927	0.096089897,0.102953054,0.098977002,0.108184177	0.101551	0.00262065	0.0913039	0.10442	0.10545	0.134013	0.111079	0.116775	0.112172	0.112022	0.0885481	0.10459	0.118926	0.100995	0.113181	0.121283	0.101073	0.110548	0.107464	0.0873559	0.113364	0.0911986	0.108907	0.134618	0.107915	0.0984164	0.111935	0.0913221	0.105857	0.113161	0.107413	0.116888	0.111031	0.121884	0.124168	0.119496	0.107281	0.118822	0.0985088	0.116518	0.104313	0.120377	0.147021	0.120262	0.111764	0.134062	0.115607
STAT5A	STAT5.ALPHA.R.V_GBL.9014928	0.309552047,0.309895121,0.298950006,0.303412376	0.305452	0.00262976	0.282529	0.310597	0.289384	0.334484	0.319435	0.321182	0.358393	0.241249	0.225663	0.237162	0.271635	0.192246	0.224462	0.267908	0.230549	0.263462	0.297093	0.267584	0.293291	0.293665	0.255769	0.34012	0.213641	0.302606	0.335648	0.321727	0.331565	0.280175	0.318182	0.286969	0.328032	0.26573	0.274668	0.27612	0.316066	0.331929	0.266375	0.282712	0.230512	0.285378	0.292532	0.301084	0.287795	0.253772	0.198172
STMN1	Stathmin.R.V_GBL.9014929	0.062975522,0.067001332,0.06782341,0.062726604	0.0651317	0.00132836	0.0622359	0.0665885	0.0735381	0.0687071	0.0669847	0.0570148	0.0822639	0.0553122	0.0699831	0.0650548	0.0700098	0.0663201	0.0633522	0.0707586	0.0713337	0.0738736	0.0658108	0.0668783	0.0671634	0.0703902	0.0596504	0.0652256	0.0698378	0.0604099	0.0582039	0.061948	0.0694061	0.0827723	0.0633548	0.0664797	0.0696132	0.0641786	0.0720045	0.06217	0.0751163	0.0730371	0.0822109	0.0637808	0.0591238	0.0629851	0.0626753	0.0639118	0.0700372	0.0774389	0.0586399
SYK	Syk.M.V_GBL.9014989	0.006650359,0.008728569,0.006657634,0.007803811	0.00746009	0.000502227	0.00891295	0.00714845	0.00770773	0.00822741	0.00772577	0.00916613	0.00847326	0.0075686	0.00877857	0.00804628	0.010384	0.0109438	0.0079598	0.00783971	0.00685837	0.00650443	0.00736829	0.00945191	0.00725504	0.00850577	0.00795798	0.00749402	0.00787709	0.00750064	0.0073245	0.00666038	0.0073707	0.00727391	0.00818529	0.00737253	0.00771741	0.00798591	0.0102532	0.0077314	0.0134245	0.00780402	0.00613383	0.00883603	0.00826188	0.00751751	0.00870122	0.00699299	0.007522	0.0180234	0.00672948
TP53	p53.R.V_GBL.9014904	0.088245468,0.103267447,0.051396415,0.089897066	0.0832016	0.0111223	0.108124	0.0899001	0.0875524	0.0902838	0.0955684	0.107199	0.0969621	0.084558	0.0901251	0.0823738	0.0965538	0.0915383	0.0897663	0.099832	0.092002	0.112735	0.0855417	0.0951198	0.0965895	0.0662858	0.094648	0.100464	0.0568759	0.0874538	0.0803136	0.0888834	0.0818279	0.0869638	0.0865619	0.0877424	0.0951812	0.0805204	0.092382	0.0597568	0.0925162	0.0840197	0.0889095	0.107388	0.0951146	0.0963917	0.081365	0.0833967	0.0908425	0.104391	0.0872173
TP53BP1	X53BP1.R.C_GBL.9014822	0.675748391,0.734601459,0.728268001,0.780251047	0.729717	0.0213936	0.773736	0.740042	0.730008	0.730799	0.710848	0.66683	0.771742	0.775777	0.900283	0.653986	0.80162	0.674502	0.779156	0.802279	0.720355	0.837681	0.778853	0.762491	0.890037	0.692593	0.748543	0.772819	0.743467	0.794422	0.871502	0.747768	0.646024	0.722697	0.81074	0.676607	0.899011	0.63018	0.548288	0.722084	0.677441	0.771762	0.809206	0.900772	0.703341	0.892809	0.625575	0.727355	0.69777	0.793879	0.80807
TSC2	Tuberin.R.C_GBL.9014931	0.698696215,0.704389945,0.72010269,0.716647153	0.709959	0.00504555	0.699845	0.616459	0.574678	0.85678	0.585686	0.844915	0.681696	0.768313	0.838086	0.749062	0.918177	0.455163	0.757852	0.889519	0.648961	0.9294	0.855685	1.14853	0.869019	0.750787	0.803304	0.627976	0.939237	0.769761	0.71344	0.792748	0.921561	0.784027	0.79457	0.820055	0.778102	0.718751	0.702056	0.92657	0.796843	0.585454	0.750379	0.911102	0.752721	0.714474	0.653673	0.851628	0.757269	0.704113	0.764527
VASP	VASP.R.C_GBL.9014877	0.163391205,0.174974025,0.151865661,0.164614571	0.163711	0.00472658	0.189262	0.169639	0.160012	0.222186	0.171362	0.142257	0.202602	0.166816	0.170605	0.179661	0.167152	0.196482	0.169612	0.137217	0.164276	0.168362	0.143172	0.201381	0.180116	0.159819	0.168858	0.182658	0.15989	0.165789	0.164454	0.167016	0.210658	0.162058	0.174123	0.176048	0.167392	0.161397	0.170655	0.197389	0.165861	0.164338	0.18467	0.163165	0.165358	0.171901	0.169257	0.163211	0.154632	0.1508	0.155129
WWTR1	TAZ_pS89.R.C_GBL.9014930	0.05977363,0.06350873,0.069190042,0.063229858	0.0639256	0.00194959	0.0535013	0.0556938	0.0571526	0.0536098	0.0563639	0.0603688	0.0581927	0.0588116	0.0615648	0.0610843	0.0566762	0.0589234	0.0663445	0.0564219	0.0538467	0.0617618	0.0516172	0.0526189	0.0570683	0.0601001	0.0418324	0.055985	0.0532972	0.0537051	0.0555862	0.0611196	0.0598382	0.0693275	0.0601597	0.0689639	0.0563469	0.0638562	0.0627187	0.0648316	0.0642308	0.0657832	0.0633321	0.052064	0.0626574	0.0535486	0.0558045	0.0642162	0.0663719	0.0587712	0.0617141
XIAP	XIAP.R.C_GBL.9014933	0.204527991,0.188911742,0.199374706,0.181972991	0.193697	0.00508181	0.160486	0.180743	0.180229	0.149389	0.194749	0.189346	0.118481	0.169914	0.165135	0.132131	0.171301	0.135694	0.184382	0.160941	0.188841	0.183734	0.173239	0.155427	0.190163	0.153409	0.15751	0.163675	0.172357	0.182159	0.126045	0.180243	0.151685	0.152251	0.175417	0.163102	0.177487	0.21733	0.171966	0.193751	0.161737	0.191907	0.157627	0.158001	0.144552	0.174228	0.176281	0.164281	0.182869	0.142024	0.163374
YAP1	YAP.R.V_GBL.9014936	0.123301288,0.129930385,0.122786207,0.113473024	0.122373	0.00338324	0.147779	0.120756	0.134664	0.152702	0.138538	0.129844	0.119083	0.138532	0.146008	0.123217	0.113962	0.138059	0.136946	0.127307	0.12667	0.115942	0.130658	0.112908	0.124892	0.120244	0.128809	0.143221	0.10902	0.117981	0.145251	0.1302	0.132278	0.131529	0.141353	0.133702	0.148871	0.131087	0.167693	0.156154	0.127704	0.13084	0.119122	0.115813	0.127038	0.142771	0.148735	0.157281	0.118464	0.135531	0.112187
YAP1	YAP_pS127.R.C_GBL.9014935	0.179614218,0.174738355,0.157747358,0.163612072	0.168928	0.00501017	0.172954	0.179522	0.185164	0.212574	0.192649	0.161627	0.194342	0.169334	0.210005	0.181069	0.152867	0.188157	0.175053	0.180652	0.191787	0.158266	0.176095	0.174847	0.1767	0.165541	0.16079	0.195099	0.153963	0.167627	0.19365	0.172918	0.182447	0.182923	0.210265	0.184028	0.219319	0.181973	0.195864	0.19847	0.190779	0.16726	0.183495	0.1858	0.17105	0.181847	0.175228	0.175107	0.150429	0.167763	0.161293
YBX1	YB.1_pS102.R.V_GBL.9014934	0.388802589,0.31425554,0.338927441,0.312657204	0.338661	0.0177625	0.389532	0.377981	0.369054	0.660508	0.379702	0.426305	0.331987	0.329465	0.337306	0.319678	0.27447	0.306032	0.329046	0.352468	0.402675	0.270099	0.346698	0.370117	0.375548	0.417264	0.39231	0.356966	0.273328	0.330474	0.246334	0.300137	0.337675	0.329075	0.467398	0.389805	0.38954	0.350115	0.304001	0.486405	0.299191	0.363821	0.353803	0.27034	0.318925	0.291438	0.336452	0.398894	0.321082	0.256542	0.280734
YWHAE	X14.3.3_epsilon.M.C_GBL.9014939	0.108849079,0.104700779,0.109029994,0.099182234	0.105441	0.00231329	0.107906	0.0989616	0.113966	0.0891365	0.114479	0.092132	0.0934397	0.0978513	0.0881412	0.106158	0.0876234	0.12154	0.0971531	0.100782	0.101955	0.12283	0.10201	0.0966258	0.102298	0.103578	0.112135	0.130111	0.117024	0.103688	0.100165	0.103507	0.0908711	0.0799877	0.0898122	0.115528	0.110592	0.11308	0.11987	0.114028	0.119308	0.103451	0.0896034	0.094385	0.117889	0.098455	0.10301	0.130589	0.103945	0.149847	0.104835
[truncated: 114 more columns]

## Sheet: Step I (Gene)
Gene Symbol	Antibody	Num Pred MiR	Mock Average	Pred MiR Average	Fold Change (Pred MiR/Mock)	S.E.M.	Pval (one-tail)
ACACA	ACC_pS79.R.V_GBL.9014843	16	0.23105	0.23468	1.01572	0.04386	0.432223
ACACA	ACC1.R.C_GBL.9014824	16	1.53394	1.36083	0.88715	0.03873	0.0861177
ACACB	ACC_pS79.R.V_GBL.9014843	5	0.23105	0.25397	1.09921	0.16288	0.305978
AKT1	Akt.R.V_GBL.9014827	8	0.74336	0.75275	1.01264	0.02929	0.391276
AKT1	Akt_pS473.R.V_GBL.9014825	8	0.03431	0.02192	0.63881	0.05872	0.001245
AKT1	Akt_pT308.R.V_GBL.9014971	8	0.07526	0.08098	1.07602	0.12389	0.367748
AKT1S1	PRAS40_pT246.R.V_GBL.9014915	8	0.20553	0.1984	0.9653	0.05809	0.348764
AKT2	Akt.R.V_GBL.9014827	10	0.74336	0.75444	1.01491	0.04777	0.426094
AKT2	Akt_pS473.R.V_GBL.9014825	10	0.03431	0.02162	0.63006	0.05612	0.00103719
AKT2	Akt_pT308.R.V_GBL.9014971	10	0.07526	0.08473	1.12574	0.09567	0.260587
AKT3	Akt.R.V_GBL.9014827	58	0.74336	0.73854	0.99351	0.01568	0.457397
AKT3	Akt_pS473.R.V_GBL.9014825	58	0.03431	0.02226	0.64888	0.02833	0.00105045
AKT3	Akt_pT308.R.V_GBL.9014971	58	0.07526	0.08357	1.11041	0.04612	0.273371
ANXA1	Annexin.I.R.V_GBL.9014990	1	0.73801	0.5107	0.692	0	0.00372869
AR	AR.R.V_GBL.9014831	7	0.01777	0.0171	0.96222	0.05185	0.306794
BAK1	Bak.R.C_GBL.9014832	10	0.19321	0.17855	0.92413	0.02052	0.0268551
BAX	Bax.R.V_GBL.9014833	5	0.44424	0.4376	0.98506	0.10873	0.453616
BCL2	Bcl.2.M.V_GBL.9014998	22	0.03273	0.03112	0.95079	0.03765	0.300359
BCL2L1	Bcl.X.R.V_GBL.9014835	18	0.33049	0.28894	0.87429	0.02688	0.0224833
BCL2L1	Bcl.xL.R.V_GBL.9014834	18	0.19372	0.1689	0.8719	0.01393	0.00059914
BCL2L11	Bim.R.V_GBL.9014838	47	0.10071	0.12088	1.20032	0.02242	0.00651789
BECN1	Beclin.G.V_GBL.9014969	22	0.09758	0.09106	0.93311	0.02629	0.153121
BID	Bid.R.C_GBL.9014837	10	0.13565	0.12437	0.91684	0.01753	0.0105754
BIRC2	cIAP.R.V_GBL.9014848	5	0.28518	0.22807	0.79977	0.04286	0.00270024
CASP3	Caspase.3_active.R.C_GBL.9014991	12	0.0091	0.00936	1.02775	0.06523	0.408881
CASP7	Caspase.7_cleavedD198.R.C_GBL.9014840	18	0.00845	0.00722	0.85493	0.04352	0.0779277
CASP7	Caspase.7_cleavedD198.R.C_GBL.9014992	18	0.00583	0.00792	1.35712	0.07482	0.0199161
CASP8	Caspase.8.M.C_GBL.9014945	1	0.23636	0.18774	0.79429	0	0.0122367
CASP9	Caspase.9_cleavedD330.R.C_GBL.9014841	2	0.10718	0.10622	0.99097	0.05497	0.443944
CAV1	Caveolin.1.R.V_GBL.9014842	19	2.30755	1.87427	0.81223	0.07215	0.128809
CCNB1	Cyclin.B1.R.V_GBL.9014858	3	0.78109	0.54977	0.70385	0.18343	0.0575781
CCND1	Cyclin.D1.R.V_GBL.9014859	43	0.18727	0.16626	0.88779	0.01165	0.00358541
CCNE1	Cyclin_E1.M.V_GBL.9014950	11	0.10333	0.1046	1.0123	0.05739	0.451115
CCNE1	Cyclin_E1.M.V_GBL.9014986	11	0.10068	0.1013	1.00613	0.04664	0.469887
CDH1	E.Cadherin.R.V_GBL.9014862	6	0.02856	0.036	1.2606	0.13813	0.0900411
CDH2	N.Cadherin.R.V_GBL.9014893	35	0.0674	0.0676	1.00298	0.01422	0.472508
CDH3	P.Cadherin.R.C_GBL.9014909	6	0.21789	0.20231	0.9285	0.04113	0.140643
CDK1	CDK1.R.V_GBL.9014844	6	0.27518	0.24807	0.90149	0.06891	0.168577
CDK1	CDK1.R.V_GBL.9014947	6	0.14366	0.13542	0.94266	0.02124	0.0484643
CDKN1A	p21.R.C_GBL.9014898	14	0.23993	0.21764	0.90709	0.03473	0.0939638
CDKN1B	p27.R.V_GBL.9014937	34	0.0826	0.08508	1.02997	0.03395	0.38431
CDKN1B	p27.R.V_GBL.9014980	34	0.00575	0.00684	1.19101	0.05046	0.104547
CDKN1B	p27.R.V_GBL.9014994	34	0.0553	0.0659	1.19161	0.04495	0.0791251
CDKN1B	p27_pT157.R.C_GBL.9014899	34	2.71582e+08	2.55056e+08	0.93915	0.03224	0.264139
CDKN1B	p27_pT198.R.V_GBL.9014900	34	0.15863	0.16317	1.02865	0.01919	0.316748
CHEK1	Chk1.R.C_GBL.9014846	8	0.2641	0.25719	0.9738	0.02285	0.230496
CHEK1	Chk1.R.C_GBL.9014975	8	0.06794	0.07088	1.0433	0.05391	0.350774
CHEK1	Chk1_pS345.R.C_GBL.9014845	8	0.13569	0.13028	0.96011	0.01443	0.0897767
CLDN7	Claudin.7.R.V_GBL.9014851	2	0.03554	0.03558	1.00123	0.00693	0.483447
COL6A1	Collagen.VI.R.V_GBL.9014978	2	0.0404	0.0429	1.06178	0.14099	0.268645
CTNNA1	alpha.Catenin.M.V_GBL.9014941	20	0.32942	0.23515	0.71381	0.01054	0.00534802
CTNNA1	alpha.Catenin.M.V_GBL.9014983	20	0.19028	0.18567	0.97577	0.01509	0.265245
CTNNB1	beta.Catenin.R.V_GBL.9014836	40	0.72585	0.68177	0.93926	0.02211	0.19864
DIABLO	Smac.M.V_GBL.9014956	2	0.39855	0.26159	0.65635	0.10167	0.00634372
DVL3	Dvl3.R.V_GBL.9014861	17	0.13826	0.13019	0.9416	0.03674	0.23616
EEF2K	eEF2K.R.V_GBL.9014863	11	0.114	0.08675	0.76095	0.03331	0.000560862
EGFR	EGFR.R.C_GBL.9014867	7	0.12671	0.12062	0.95195	0.03818	0.210928
EGFR	EGFR_pY1068.R.V_GBL.9014878	7	0.06641	0.07237	1.08984	0.06336	0.180587
EGFR	EGFR_pY1173.R.C_GBL.9014865	7	0.06751	0.06901	1.02225	0.03484	0.33816
EIF4E	eIF4E.R.V_GBL.9014868	13	0.56513	0.55445	0.98109	0.02225	0.341748
EIF4EBP1	X4E.BP1.R.V_GBL.9014821	4	0.30792	0.26783	0.86979	0.06445	0.0539699
EIF4EBP1	X4E.BP1_pS65.R.V_GBL.9014938	4	0.10452	0.0975	0.93287	0.04376	0.0990189
EIF4EBP1	X4EBP1_pT37.R.V_GBL.9014820	4	0.3788	0.3049	0.80492	0.0503	0.00586152
ERBB2	HER2.M.V_GBL.9014955	2	0.23161	0.2061	0.88984	0.02493	0.0102277
ERBB2	HER2.R.V_GBL.9014879	2	0.03004	0.02952	0.98272	0.00287	0.421601
ERBB2	HER2_pY1248.R.V_GBL.9014982	2	0.24471	0.25835	1.05575	0.16579	0.310161
ERBB2	HER2_pY1248.R.V_GBL.9014995	2	0.08236	0.09394	1.14063	0.08161	0.0367093
ERBB2	HER2_pY1248_GBL9014981	2	0.10306	0.11203	1.08701	0.12862	0.167249
ERBB3	HER3.R.V_GBL.9014881	27	0.04516	0.04939	1.09366	0.05492	0.261921
ERBB3	HER3_pY1298.R.C_GBL.9014880	27	0.0639	0.0648	1.01409	0.02635	0.420668
ERCC1	ERCC1.M.C_GBL.9014951	4	0.09453	0.08674	0.91751	0.03833	0.0663144
ERRFI1	MIG.6.M.V_GBL.9014957	24	0.04674	0.04411	0.94362	0.03686	0.272451
ERRFI1	MIG.6.M.V_GBL.9014987	24	0.85056	0.81814	0.96188	0.03989	0.352856
ESR1	ER.alpha.R.V_GBL.9014870	52	0.00204	0.00198	0.97003	0.04459	0.428144
ESR1	ER.alpha_pS118.R.V_GBL.9014869	52	0.28474	0.28494	1.00072	0.00985	0.492017
FN1	Fibronectin.R.C_GBL.9014872	18	0.56659	0.55993	0.98824	0.05929	0.4643
FOXO3	FOXO3a.R.C_GBL.9014874	44	0.05465	0.04918	0.89997	0.01701	0.0453426
FOXO3	FOXO3A_pS318_S321.R.C_GBL.9014873	44	0.26123	0.23682	0.90656	0.00839	0.00171866
GAB2	GAB2.R.V_GBL.9014875	16	0.36723	0.28291	0.77041	0.04461	0.0107527
GATA3	GATA3.M.V_GBL.9014953	20	0.1104	0.10735	0.97242	0.02418	0.311668
GSK3A	GSK3.alpha.beta.M.V_GBL.9014954	14	0.63645	0.62303	0.97891	0.04099	0.396028
GSK3A	GSK3alpha.beta_pS21_S9.R.V_GBL.9014876	14	0.43924	0.4255	0.96873	0.03535	0.327337
GSK3B	GSK3.alpha.beta.M.V_GBL.9014954	71	0.63645	0.60548	0.95134	0.01207	0.17278
GSK3B	GSK3alpha.beta_pS21_S9.R.V_GBL.9014876	71	0.43924	0.41329	0.94094	0.01574	0.190252
IGF1R	IGF.1R.beta.R.C_GBL.9014883	51	0.21396	0.21648	1.01181	0.02565	0.449414
IGFBP2	IGFBP2.R.V_GBL.9014884	2	0.02146	0.02298	1.07076	0.12618	0.264557
INPP4B	INPP4B.G.C_GBL.9014970	4	0.10758	0.10274	0.95503	0.05398	0.233703
IRS1	IRS1.R.V_GBL.9014885	33	0.2258	0.20553	0.91025	0.03356	0.182153
JUN	c.Jun_pS73.R.C_GBL.9014849	15	0.11285	0.12852	1.13879	0.05524	0.111645
KDR	VEGFR2.R.V_GBL.9014932	9	1.90361	2.07466	1.08986	0.05421	0.169425
KIT	c.Kit.R.V_GBL.9014850	43	0.00332	0.00339	1.01968	0.03664	0.439136
LCK	Lck.R.V_GBL.9014887	1	0.06512	0.06745	1.03582	0	0.251936
MAP2K1	MEK1.R.V_GBL.9014890	22	0.62277	0.58314	0.93636	0.03185	0.206111
MAP2K1	MEK1_pS217_S221.R.V_GBL.9014889	22	0.87252	0.9238	1.05877	0.02775	0.191757
MAPK1	MAPK_pT202_Y204.R.V_GBL.9014888	34	0.1941	0.18451	0.95059	0.02937	0.286234
MAPK14	p38_MAPK.R.C_GBL.9014902	28	0.90519	0.79705	0.88053	0.03083	0.0817219
MAPK14	p38_pT180_Y182.R.V_GBL.9014903	28	0.25298	0.22763	0.8998	0.05021	0.231991
MAPK3	MAPK_pT202_Y204.R.V_GBL.9014888	16	0.1941	0.19198	0.98908	0.05301	0.460414
MAPK9	JNK2.R.C_GBL.9014886	21	0.12588	0.11495	0.91314	0.0204	0.0585921
MAPT	Tau.M.C_GBL.9014968	18	0.08797	0.13702	1.55764	0.09928	0.00866219
MET	c.Met.M.C_GBL.9014985	45	0.09452	0.09529	1.00815	0.02008	0.452709
MET	c.Met_pY1235.R.C_GBL.9014852	45	0.14919	0.14064	0.94267	0.0286	0.278475
MRE11A	Mre11.R.C_GBL.9014891	6	0.13345	0.13779	1.03252	0.02568	0.185267
MSH2	MSH2.M.C_GBL.9014958	3	0.17593	0.15986	0.90868	0.04961	0.0746266
MSH6	MSH6.R.C_GBL.9014892	3	0.85871	0.80004	0.93168	0.01735	0.0176192
MYC	c.Myc.R.C_GBL.9014853	16	0.32699	0.26726	0.81732	0.03211	0.00615386
NCOA3	AIB1.M.V_GBL.9014940	34	0.30015	0.30794	1.02596	0.02638	0.370653
NF2	NF2.R.C_GBL.9014894	19	0.09306	0.09444	1.01482	0.04263	0.438667
NFKB1	NF.kB.p65_pS536.R.C_GBL.9014895	2	0.28364	0.26794	0.94464	0.13197	0.27603
NOTCH1	Notch1.R.V_GBL.9014896	11	0.17711	0.17837	1.00713	0.10802	0.484829
NOTCH3	Notch3.R.C_GBL.9014897	16	0.09813	0.09014	0.91853	0.02468	0.0784803
PARK7	DJ.1.R.C_GBL.9014860	1	0.97927	0.92989	0.94957	0	0.277349
PARP1	PARP_cleaved.M.C_GBL.9014960	7	0.05038	0.04976	0.98767	0.04243	0.418648
PCNA	PCNA.M.V_GBL.9014961	1	0.62199	0.5342	0.85886	0	0.159178
PDK1	PDK1_pS241.R.V_GBL.9014910	6	0.14398	0.1473	1.02302	0.05354	0.378662
PEA15	Pea.15.R.V_GBL.9014911	29	0.19663	0.19738	1.00381	0.0159	0.466737
PECAM1	CD31.M.V_GBL.9014946	11	0.05646	0.05912	1.04707	0.01678	0.0671642
PGR	PR.R.V_GBL.9014916	11	0.00207	0.00266	1.2898	0.15531	0.159185
PIK3CA	PI3K.p110.alpha.R.C_GBL.9014912	22	0.2149	0.19353	0.90055	0.02604	0.0643336
PIK3R1	PI3K.p85.R.V_GBL.9014913	50	0.85078	0.83951	0.98675	0.01481	0.401684
PRKAA1	AMPK.alpha.R.C_GBL.9014828	19	0.38969	0.35255	0.9047	0.02216	0.0432594
PRKAA1	AMPK_pT172.R.V_GBL.9014829	19	1.11152	1.07056	0.96315	0.03265	0.308718
PRKCA	PKC.alpha.M.V_GBL.9014962	10	0.61868	0.56763	0.91749	0.03732	0.103888
PRKCA	PKC.alpha_pS657.R.V_GBL.9014914	10	0.37125	0.32595	0.87797	0.03763	0.0351993
PTCH1	PTCH.R.C_GBL.9014917	24	0.42442	0.43361	1.02165	0.02708	0.375661
PTEN	PTEN.R.V_GBL.9014918	69	0.97215	1.06794	1.09852	0.02003	0.122241
PTGS2	COX.2.R.C_GBL.9014979	9	0.1013	0.10165	1.00353	0.08585	0.489705
PTK2	FAK.pY397_GBL.9014963	32	0.1107	0.11531	1.04168	0.02118	0.249016
PTK2	FAK.R.C_GBL.9014871	32	0.70057	0.67319	0.96091	0.02054	0.255849
PXN	Paxillin.R.V_GBL.9014908	10	0.79067	0.65899	0.83346	0.06756	0.0785348
RAB25	Rab25.R.C_GBL.9014919	3	0.05113	0.05473	1.07028	0.06498	0.173303
RAD50	Rad50.M.C_GBL.9014944	4	0.27676	0.27795	1.00431	0.0146	0.392527
RAD51	Rad51.M.C_GBL.9014959	5	0.05898	0.04728	0.8016	0.08418	0.0543703
RAD51	Rad51.M.C_GBL.9014988	5	0.0343	0.0278	0.81053	0.09843	0.0872954
RAF1	C.Raf.R.V_GBL.9014857	19	0.39504	0.32582	0.82478	0.03438	0.0175183
RAF1	C.Raf_pS338.R.C_GBL.9014856	19	0.14632	0.13716	0.93737	0.02505	0.165331
RB1	Rb.M.V_GBL.9014952	29	0.16017	0.1492	0.93154	0.01186	0.0263795
RB1	Rb_pS807_S811.R.V_GBL.9014920	29	0.98107	0.84268	0.85894	0.02021	0.00857887
RPS6KA1	p90RSK_pT359_S363.R.C_GBL.9014907	22	0.25779	0.23486	0.91106	0.02369	0.0674921
RPS6KB1	p70S6K.R.V_GBL.9014906	46	0.36422	0.33154	0.91027	0.02542	0.154755
RPS6KB1	p70S6K_pT389.R.V_GBL.9014905	46	0.43416	0.40664	0.93662	0.02706	0.248598
SMAD1	Smad1.R.V_GBL.9014923	32	0.2635	0.22976	0.87196	0.01075	0.000202176
SMAD3	Smad3.R.V_GBL.9014924	17	0.2406	0.20982	0.87207	0.02783	0.0227064
SMAD4	Smad4.M.V_GBL.9014964	48	0.16425	0.16183	0.98525	0.00734	0.287826
SNAI2	Snail.M.C_GBL.9014965	30	0.03156	0.03819	1.20993	0.03212	0.0166873
SRC	Src.M.V_GBL.9014966	16	0.05392	0.05523	1.02425	0.04882	0.406763
SRC	Src_pY416.R.C_GBL.9014925	16	0.1324	0.11731	0.88599	0.03443	0.0639658
SRC	Src_pY527.R.V_GBL.9014926	16	0.61565	0.52607	0.8545	0.04442	0.0725921
STAT3	STAT3_pY705.R.V_GBL.9014927	33	0.10155	0.10873	1.07064	0.02072	0.126502
STAT5A	STAT5.ALPHA.R.V_GBL.9014928	7	0.30545	0.29543	0.96718	0.05477	0.334785
STMN1	Stathmin.R.V_GBL.9014929	22	0.06513	0.06594	1.01235	0.03689	0.44499
SYK	Syk.M.V_GBL.9014989	2	0.00746	0.00979	1.31293	0.07888	0.0245177
TP53	p53.R.V_GBL.9014904	9	0.0832	0.07731	0.92913	0.06118	0.292596
TP53BP1	X53BP1.R.C_GBL.9014822	11	0.72972	0.73591	1.00849	0.03503	0.44636
VASP	VASP.R.C_GBL.9014877	38	0.16371	0.16866	1.03023	0.02023	0.318564
WWTR1	TAZ_pS89.R.C_GBL.9014930	23	0.06393	0.0613	0.95897	0.01708	0.175461
XIAP	XIAP.R.C_GBL.9014933	24	0.1937	0.15283	0.78902	0.01906	9.09199e-05
YAP1	YAP.R.V_GBL.9014936	35	0.12237	0.13421	1.09676	0.02811	0.129859
YAP1	YAP_pS127.R.C_GBL.9014935	35	0.16893	0.16825	0.99601	0.01136	0.455095
YBX1	YB.1_pS102.R.V_GBL.9014934	22	0.33866	0.3321	0.98064	0.04113	0.424152
YWHAE	X14.3.3_epsilon.M.C_GBL.9014939	35	0.10544	0.10364	0.98296	0.0151	0.355594

## Sheet: Step I (Interaction)
MiRNA	Gene Symbol	Antibody	Fold Change	Pval (one-tail)
hsa-let-7a-3p	BCL2	Bcl.2.M.V_GBL.9014998	0.770024	0.0946994
hsa-let-7a-3p	BCL2L11	Bim.R.V_GBL.9014838	1.05596	0.157003
hsa-let-7a-3p	CDKN1B	p27.R.V_GBL.9014937	0.990554	0.46531
hsa-let-7a-3p	CTNNB1	beta.Catenin.R.V_GBL.9014836	1.02202	0.362763
hsa-let-7a-3p	FOXO3	FOXO3A_pS318_S321.R.C_GBL.9014873	0.900286	0.185161
hsa-let-7a-3p	GATA3	GATA3.M.V_GBL.9014953	0.798667	0.00481257
hsa-let-7a-3p	GSK3B	GSK3alpha.beta_pS21_S9.R.V_GBL.9014876	0.711891	0.00631247
hsa-let-7a-3p	IGF1R	IGF.1R.beta.R.C_GBL.9014883	0.980956	0.12203
hsa-let-7a-3p	IRS1	IRS1.R.V_GBL.9014885	0.733014	0.000439348
hsa-let-7a-3p	MAPK1	MAPK_pT202_Y204.R.V_GBL.9014888	0.992086	0.384195
hsa-let-7a-3p	MET	c.Met_pY1235.R.C_GBL.9014852	0.777971	0.00145878
hsa-let-7a-3p	NOTCH3	Notch3.R.C_GBL.9014897	0.91875	0.257098
hsa-let-7a-3p	PRKAA1	AMPK.alpha.R.C_GBL.9014828	0.992302	0.473291
hsa-let-7a-3p	PTCH1	PTCH.R.C_GBL.9014917	0.896708	0.0283564
hsa-let-7a-3p	RPS6KA1	p90RSK_pT359_S363.R.C_GBL.9014907	0.917399	0.136816
hsa-let-7a-3p	RPS6KB1	p70S6K_pT389.R.V_GBL.9014905	0.958474	0.0483927
hsa-let-7a-3p	SMAD4	Smad4.M.V_GBL.9014964	0.897273	0.0543604
hsa-let-7a-3p	SNAI2	Snail.M.C_GBL.9014965	1.41307	0.0743733
hsa-let-7a-3p	TP53BP1	X53BP1.R.C_GBL.9014822	1.06032	0.212672
hsa-let-7a-3p	WWTR1	TAZ_pS89.R.C_GBL.9014930	0.836932	0.0483187
hsa-let-7a-3p	YAP1	YAP_pS127.R.C_GBL.9014935	1.02383	0.371575
hsa-let-7a-5p	BCL2L1	Bcl.xL.R.V_GBL.9014834	0.824927	0.0609716
hsa-let-7a-5p	CASP3	Caspase.3_active.R.C_GBL.9014991	1.00361	0.486997
hsa-let-7a-5p	CCND1	Cyclin.D1.R.V_GBL.9014859	0.892567	0.142043
hsa-let-7a-5p	CDKN1B	p27_pT157.R.C_GBL.9014899	0.906083	0.119682
hsa-let-7a-5p	DVL3	Dvl3.R.V_GBL.9014861	0.944266	0.304823
hsa-let-7a-5p	EEF2K	eEF2K.R.V_GBL.9014863	0.718105	0.00298127
hsa-let-7a-5p	ESR1	ER.alpha.R.V_GBL.9014870	0.78407	0.237313
hsa-let-7a-5p	IGF1R	IGF.1R.beta.R.C_GBL.9014883	0.843958	0.000646924
hsa-let-7a-5p	MAPK9	JNK2.R.C_GBL.9014886	0.842756	0.16765
hsa-let-7a-5p	MYC	c.Myc.R.C_GBL.9014853	0.847756	0.00216715
hsa-let-7a-5p	PTEN	PTEN.R.V_GBL.9014918	1.28765	0.00917816
hsa-let-7a-5p	RB1	Rb_pS807_S811.R.V_GBL.9014920	0.924216	0.164086
hsa-let-7a-5p	STAT3	STAT3_pY705.R.V_GBL.9014927	1.02825	0.329004
hsa-let-7a-5p	TP53	p53.R.V_GBL.9014904	1.08051	0.402566
hsa-let-7d-5p	BCL2L1	Bcl.X.R.V_GBL.9014835	0.877974	0.0377014
hsa-let-7d-5p	CASP3	Caspase.3_active.R.C_GBL.9014991	1.18724	0.0820185
hsa-let-7d-5p	CCND1	Cyclin.D1.R.V_GBL.9014859	0.806991	0.0507129
hsa-let-7d-5p	CDKN1B	p27_pT157.R.C_GBL.9014899	0.919069	0.148115
hsa-let-7d-5p	DVL3	Dvl3.R.V_GBL.9014861	0.896197	0.183803
hsa-let-7d-5p	EEF2K	eEF2K.R.V_GBL.9014863	0.698267	0.00245265
hsa-let-7d-5p	GSK3B	GSK3.alpha.beta.M.V_GBL.9014954	1.06619	0.0611629
hsa-let-7d-5p	IGF1R	IGF.1R.beta.R.C_GBL.9014883	0.830984	0.000510987
hsa-let-7d-5p	MAPK9	JNK2.R.C_GBL.9014886	1.03568	0.405914
hsa-let-7d-5p	MYC	c.Myc.R.C_GBL.9014853	0.820158	0.00133591
hsa-let-7d-5p	PTEN	PTEN.R.V_GBL.9014918	1.26063	0.011958
hsa-let-7d-5p	RB1	Rb_pS807_S811.R.V_GBL.9014920	0.935303	0.196598
hsa-let-7d-5p	STAT3	STAT3_pY705.R.V_GBL.9014927	1.03839	0.276715
hsa-let-7d-5p	TP53	p53.R.V_GBL.9014904	1.05229	0.436134
hsa-let-7g-3p	BCL2L1	Bcl.X.R.V_GBL.9014835	0.811532	0.0128698
hsa-let-7g-3p	CCNB1	Cyclin.B1.R.V_GBL.9014858	0.360995	0.000433951
hsa-let-7g-3p	EIF4E	eIF4E.R.V_GBL.9014868	0.930436	0.238366
hsa-let-7g-3p	GATA3	GATA3.M.V_GBL.9014953	0.841263	0.00927928
hsa-let-7g-3p	GSK3B	GSK3alpha.beta_pS21_S9.R.V_GBL.9014876	0.702824	0.00579161
hsa-let-7g-3p	IGF1R	IGF.1R.beta.R.C_GBL.9014883	0.796893	0.000296412
hsa-let-7g-3p	NCOA3	AIB1.M.V_GBL.9014940	1.11166	0.0346416
hsa-let-7g-3p	NF2	NF2.R.C_GBL.9014894	0.88513	0.0209498
hsa-let-7g-3p	PTCH1	PTCH.R.C_GBL.9014917	1.08698	0.0421955
hsa-let-7g-3p	PTEN	PTEN.R.V_GBL.9014918	1.14216	0.0517117
hsa-let-7g-3p	PTK2	FAK.pY397_GBL.9014963	0.653787	0.00110424
hsa-let-7g-3p	RB1	Rb_pS807_S811.R.V_GBL.9014920	0.517332	0.00253142
hsa-let-7g-3p	SMAD4	Smad4.M.V_GBL.9014964	1.0641	0.126481
hsa-let-7g-3p	SNAI2	Snail.M.C_GBL.9014965	1.12628	0.298074
hsa-let-7g-3p	STAT5A	STAT5.ALPHA.R.V_GBL.9014928	1.09505	0.0079677
hsa-let-7g-3p	WWTR1	TAZ_pS89.R.C_GBL.9014930	0.838628	0.0494163
hsa-let-7g-3p	YWHAE	X14.3.3_epsilon.M.C_GBL.9014939	0.845372	0.0255942
hsa-let-7g-5p	BCL2L1	Bcl.xL.R.V_GBL.9014834	0.860972	0.0939617
hsa-let-7g-5p	CASP3	Caspase.3_active.R.C_GBL.9014991	1.22909	0.0552895
hsa-let-7g-5p	CCND1	Cyclin.D1.R.V_GBL.9014859	0.901289	0.158868
hsa-let-7g-5p	DVL3	Dvl3.R.V_GBL.9014861	1.00048	0.498197
hsa-let-7g-5p	EEF2K	eEF2K.R.V_GBL.9014863	0.704469	0.00260362
hsa-let-7g-5p	IGF1R	IGF.1R.beta.R.C_GBL.9014883	0.85443	0.000793849
hsa-let-7g-5p	MYC	c.Myc.R.C_GBL.9014853	0.699614	0.000294357
hsa-let-7g-5p	RB1	Rb.M.V_GBL.9014952	0.864728	0.0745077
hsa-let-7g-5p	STAT3	STAT3_pY705.R.V_GBL.9014927	1.09383	0.101214
hsa-let-7g-5p	TP53	p53.R.V_GBL.9014904	1.14864	0.326585
hsa-miR-101-3p	BCL2	Bcl.2.M.V_GBL.9014998	1.16899	0.151142
hsa-miR-101-3p	BCL2L11	Bim.R.V_GBL.9014838	1.06855	0.117924
hsa-miR-101-3p	CASP3	Caspase.3_active.R.C_GBL.9014991	0.866479	0.141077
hsa-miR-101-3p	FN1	Fibronectin.R.C_GBL.9014872	1.37075	0.0169694
hsa-miR-101-3p	GATA3	GATA3.M.V_GBL.9014953	1.15577	0.0097642
hsa-miR-101-3p	GSK3B	GSK3.alpha.beta.M.V_GBL.9014954	0.828714	0.00583295
hsa-miR-101-3p	INPP4B	INPP4B.G.C_GBL.9014970	0.919835	0.0942069
hsa-miR-101-3p	IRS1	IRS1.R.V_GBL.9014885	1.17136	0.00161662
hsa-miR-101-3p	MAPK1	MAPK_pT202_Y204.R.V_GBL.9014888	0.872772	0.00697893
hsa-miR-101-3p	MET	c.Met_pY1235.R.C_GBL.9014852	0.739642	0.000915466
hsa-miR-101-3p	NOTCH1	Notch1.R.V_GBL.9014896	0.938419	0.150184
hsa-miR-101-3p	PRKAA1	AMPK.alpha.R.C_GBL.9014828	0.828879	0.102134
hsa-miR-101-3p	PTCH1	PTCH.R.C_GBL.9014917	0.849487	0.0108677
hsa-miR-101-3p	PTGS2	COX.2.R.C_GBL.9014979	0.953277	0.300696
hsa-miR-101-3p	SMAD1	Smad1.R.V_GBL.9014923	0.863994	0.0874106
hsa-miR-101-3p	STMN1	Stathmin.R.V_GBL.9014929	0.875377	0.0358893
hsa-miR-101-3p	WWTR1	TAZ_pS89.R.C_GBL.9014930	0.944361	0.237165
hsa-miR-101-5p	BCL2L11	Bim.R.V_GBL.9014838	1.45123	0.00115273
hsa-miR-101-5p	PTGS2	COX.2.R.C_GBL.9014979	1.5478	0.00321891
hsa-miR-101-5p	RPS6KB1	p70S6K.R.V_GBL.9014906	0.778598	0.0232993
hsa-miR-101-5p	SMAD3	Smad3.R.V_GBL.9014924	0.844531	0.0418026
hsa-miR-101-5p	SRC	Src_pY527.R.V_GBL.9014926	0.624742	0.0423536
hsa-miR-103a-3p	AKT3	Akt_pS473.R.V_GBL.9014825	0.667928	0.0220385
hsa-miR-103a-3p	BECN1	Beclin.G.V_GBL.9014969	0.85112	0.0693549
hsa-miR-103a-3p	CASP3	Caspase.3_active.R.C_GBL.9014991	1.27952	0.0357382
hsa-miR-103a-3p	CCNE1	Cyclin_E1.M.V_GBL.9014986	0.829853	0.00642806
hsa-miR-103a-3p	CDKN1B	p27_pT198.R.V_GBL.9014900	0.853226	0.179786
hsa-miR-103a-3p	CHEK1	Chk1.R.C_GBL.9014846	0.98529	0.318084
hsa-miR-103a-3p	CTNNA1	alpha.Catenin.M.V_GBL.9014941	0.674082	0.298046
hsa-miR-103a-3p	CTNNB1	beta.Catenin.R.V_GBL.9014836	1.04637	0.238074
hsa-miR-103a-3p	ESR1	ER.alpha.R.V_GBL.9014870	0.809626	0.262102
hsa-miR-103a-3p	IGF1R	IGF.1R.beta.R.C_GBL.9014883	1.34447	6.1359e-05
hsa-miR-103a-3p	KIT	c.Kit.R.V_GBL.9014850	1.02172	0.475941
hsa-miR-103a-3p	MAP2K1	MEK1.R.V_GBL.9014890	0.986957	0.382258
hsa-miR-103a-3p	PIK3R1	PI3K.p85.R.V_GBL.9014913	0.963258	0.154086
hsa-miR-103a-3p	PTEN	PTEN.R.V_GBL.9014918	1.12458	0.0676757
hsa-miR-103a-3p	RAD51	Rad51.M.C_GBL.9014988	0.772737	0.108246
hsa-miR-103a-3p	RPS6KB1	p70S6K.R.V_GBL.9014906	1.00468	0.474589
hsa-miR-103a-3p	VASP	VASP.R.C_GBL.9014877	1.01896	0.394061
hsa-miR-105-3p	FOXO3	FOXO3A_pS318_S321.R.C_GBL.9014873	0.884902	0.155881
hsa-miR-105-3p	MET	c.Met.M.C_GBL.9014985	0.813168	0.0117027
hsa-miR-105-3p	SNAI2	Snail.M.C_GBL.9014965	1.10244	0.332234
hsa-miR-106a-5p	AKT3	Akt_pS473.R.V_GBL.9014825	0.709957	0.0306111
hsa-miR-106a-5p	BCL2L11	Bim.R.V_GBL.9014838	1.13363	0.0317183
hsa-miR-106a-5p	BECN1	Beclin.G.V_GBL.9014969	1.19792	0.0380105
hsa-miR-106a-5p	BID	Bid.R.C_GBL.9014837	0.896138	0.0654812
hsa-miR-106a-5p	CASP7	Caspase.7_cleavedD198.R.C_GBL.9014840	0.688511	0.0647026
hsa-miR-106a-5p	CAV1	Caveolin.1.R.V_GBL.9014842	1.04078	0.362215
hsa-miR-106a-5p	CCND1	Cyclin.D1.R.V_GBL.9014859	0.958931	0.326525
hsa-miR-106a-5p	CDKN1A	p21.R.C_GBL.9014898	1.00186	0.487856
hsa-miR-106a-5p	CDKN1B	p27_pT157.R.C_GBL.9014899	0.665226	0.00683956
hsa-miR-106a-5p	ERBB3	HER3_pY1298.R.C_GBL.9014880	0.876568	0.0314135
hsa-miR-106a-5p	ESR1	ER.alpha.R.V_GBL.9014870	0.56496	0.09951
hsa-miR-106a-5p	MAP2K1	MEK1.R.V_GBL.9014890	0.992681	0.432869
hsa-miR-106a-5p	MAPK1	MAPK_pT202_Y204.R.V_GBL.9014888	0.997853	0.467919
hsa-miR-106a-5p	MET	c.Met.M.C_GBL.9014985	0.951653	0.17436
hsa-miR-106a-5p	MYC	c.Myc.R.C_GBL.9014853	0.855328	0.00251038
hsa-miR-106a-5p	NCOA3	AIB1.M.V_GBL.9014940	1.08523	0.062208
hsa-miR-106a-5p	PIK3R1	PI3K.p85.R.V_GBL.9014913	0.987621	0.353833
hsa-miR-106a-5p	PTEN	PTEN.R.V_GBL.9014918	1.18818	0.0273586
hsa-miR-106a-5p	PTK2	FAK.R.C_GBL.9014871	1.06461	0.0389575
hsa-miR-106a-5p	RB1	Rb_pS807_S811.R.V_GBL.9014920	0.923622	0.162501
hsa-miR-106a-5p	RPS6KA1	p90RSK_pT359_S363.R.C_GBL.9014907	0.986666	0.421496
hsa-miR-106a-5p	SMAD1	Smad1.R.V_GBL.9014923	0.846185	0.0695242
hsa-miR-106a-5p	SMAD4	Smad4.M.V_GBL.9014964	0.881297	0.0397111
hsa-miR-106a-5p	SRC	Src_pY416.R.C_GBL.9014925	0.811282	0.0288905
hsa-miR-106a-5p	STAT3	STAT3_pY705.R.V_GBL.9014927	1.02993	0.319935
hsa-miR-106a-5p	VASP	VASP.R.C_GBL.9014877	1.09742	0.11421
hsa-miR-106a-5p	XIAP	XIAP.R.C_GBL.9014933	0.682156	0.00616719
hsa-miR-106a-5p	YAP1	YAP.R.V_GBL.9014936	1.0069	0.459108
hsa-miR-106b-3p	BCL2L1	Bcl.xL.R.V_GBL.9014834	0.822317	0.0591667
hsa-miR-106b-3p	MAP2K1	MEK1.R.V_GBL.9014890	1.0023	0.478789
hsa-miR-106b-3p	MET	c.Met_pY1235.R.C_GBL.9014852	0.837839	0.00360765
hsa-miR-106b-3p	PEA15	Pea.15.R.V_GBL.9014911	1.08203	0.209832
hsa-miR-106b-5p	AKT3	Akt_pT308.R.V_GBL.9014971	0.741538	0.289626
hsa-miR-106b-5p	BCL2L11	Bim.R.V_GBL.9014838	1.16003	0.0204522
hsa-miR-106b-5p	BECN1	Beclin.G.V_GBL.9014969	0.975312	0.380724
hsa-miR-106b-5p	BID	Bid.R.C_GBL.9014837	1.0303	0.294749
hsa-miR-106b-5p	CASP7	Caspase.7_cleavedD198.R.C_GBL.9014840	0.761214	0.10481
hsa-miR-106b-5p	CAV1	Caveolin.1.R.V_GBL.9014842	1.02996	0.397274
hsa-miR-106b-5p	CCND1	Cyclin.D1.R.V_GBL.9014859	1.0035	0.484416
hsa-miR-106b-5p	CDKN1A	p21.R.C_GBL.9014898	0.693085	0.00602643
hsa-miR-106b-5p	ERBB3	HER3.R.V_GBL.9014881	0.847268	0.055428
hsa-miR-106b-5p	ESR1	ER.alpha_pS118.R.V_GBL.9014869	1.08432	0.0072191
hsa-miR-106b-5p	MAPK1	MAPK_pT202_Y204.R.V_GBL.9014888	0.958344	0.0941927
hsa-miR-106b-5p	NCOA3	AIB1.M.V_GBL.9014940	0.805391	0.00842964
hsa-miR-106b-5p	PIK3R1	PI3K.p85.R.V_GBL.9014913	1.01271	0.35025
hsa-miR-106b-5p	PTEN	PTEN.R.V_GBL.9014918	1.2327	0.0160917
hsa-miR-106b-5p	PTK2	FAK.R.C_GBL.9014871	0.985281	0.295229
hsa-miR-106b-5p	RB1	Rb.M.V_GBL.9014952	0.915261	0.156517
hsa-miR-106b-5p	RPS6KA1	p90RSK_pT359_S363.R.C_GBL.9014907	0.849753	0.0466032
hsa-miR-106b-5p	SMAD1	Smad1.R.V_GBL.9014923	0.771315	0.029379
hsa-miR-106b-5p	SMAD4	Smad4.M.V_GBL.9014964	0.9761	0.317561
hsa-miR-106b-5p	STAT3	STAT3_pY705.R.V_GBL.9014927	0.994524	0.465191
hsa-miR-106b-5p	VASP	VASP.R.C_GBL.9014877	1.20018	0.0266333
hsa-miR-106b-5p	XIAP	XIAP.R.C_GBL.9014933	0.700547	0.0072715
hsa-miR-107	AKT3	Akt_pS473.R.V_GBL.9014825	0.621958	0.0158604
hsa-miR-107	BECN1	Beclin.G.V_GBL.9014969	0.805188	0.0393983
hsa-miR-107	CASP3	Caspase.3_active.R.C_GBL.9014991	1.47613	0.00930608
hsa-miR-107	CCNE1	Cyclin_E1.M.V_GBL.9014950	0.662428	0.00297386
hsa-miR-107	CDKN1B	p27_pT198.R.V_GBL.9014900	0.850283	0.175705
hsa-miR-107	CHEK1	Chk1.R.C_GBL.9014846	0.950042	0.0864171
hsa-miR-107	CTNNA1	alpha.Catenin.M.V_GBL.9014941	0.700847	0.3126
hsa-miR-107	ESR1	ER.alpha_pS118.R.V_GBL.9014869	0.939742	0.0176548
hsa-miR-107	IGF1R	IGF.1R.beta.R.C_GBL.9014883	1.33801	6.49333e-05
hsa-miR-107	KIT	c.Kit.R.V_GBL.9014850	1.15037	0.340448
hsa-miR-107	MAP2K1	MEK1.R.V_GBL.9014890	1.02824	0.264451
hsa-miR-107	PIK3R1	PI3K.p85.R.V_GBL.9014913	0.993011	0.415416
hsa-miR-107	PTEN	PTEN.R.V_GBL.9014918	1.22	0.0185785
hsa-miR-107	RAD51	Rad51.M.C_GBL.9014988	0.656116	0.0496236
hsa-miR-107	RPS6KB1	p70S6K.R.V_GBL.9014906	0.9594	0.295232
hsa-miR-107	VASP	VASP.R.C_GBL.9014877	1.03604	0.307791
hsa-miR-10b-3p	CDH2	N.Cadherin.R.V_GBL.9014893	0.946153	0.147008
hsa-miR-10b-3p	CTNNB1	beta.Catenin.R.V_GBL.9014836	1.02999	0.317865
hsa-miR-10b-3p	FOXO3	FOXO3A_pS318_S321.R.C_GBL.9014873	0.901643	0.187991
hsa-miR-10b-3p	GATA3	GATA3.M.V_GBL.9014953	0.811416	0.00577926
hsa-miR-10b-3p	GSK3B	GSK3.alpha.beta.M.V_GBL.9014954	0.855216	0.00925724
hsa-miR-10b-3p	MAPK1	MAPK_pT202_Y204.R.V_GBL.9014888	1.03408	0.129663
hsa-miR-10b-3p	MAPT	Tau.M.C_GBL.9014968	1.63926	0.000682638
hsa-miR-10b-3p	NOTCH3	Notch3.R.C_GBL.9014897	0.907569	0.231496
hsa-miR-10b-3p	PRKCA	PKC.alpha_pS657.R.V_GBL.9014914	0.90744	0.0254799
hsa-miR-10b-3p	PTCH1	PTCH.R.C_GBL.9014917	1.06602	0.0745244
hsa-miR-10b-3p	PTEN	PTEN.R.V_GBL.9014918	1.26155	0.0118466
hsa-miR-10b-3p	RB1	Rb_pS807_S811.R.V_GBL.9014920	0.835684	0.0428483
hsa-miR-10b-3p	SMAD4	Smad4.M.V_GBL.9014964	1.03244	0.263323
hsa-miR-10b-3p	WWTR1	TAZ_pS89.R.C_GBL.9014930	0.882619	0.0918445
hsa-miR-10b-3p	YWHAE	X14.3.3_epsilon.M.C_GBL.9014939	0.95582	0.217096
hsa-miR-1184	BAK1	Bak.R.C_GBL.9014832	1.02633	0.306523
hsa-miR-1184	BCL2L11	Bim.R.V_GBL.9014838	1.09864	0.0616661
hsa-miR-1184	BECN1	Beclin.G.V_GBL.9014969	0.911801	0.160235
hsa-miR-1184	CASP3	Caspase.3_active.R.C_GBL.9014991	1.0095	0.465883
hsa-miR-1184	CTNNA1	alpha.Catenin.M.V_GBL.9014941	0.710648	0.31805
hsa-miR-1184	ERRFI1	MIG.6.M.V_GBL.9014957	0.949377	0.114917
hsa-miR-1184	PEA15	Pea.15.R.V_GBL.9014911	0.851407	0.0948093
hsa-miR-1184	PIK3R1	PI3K.p85.R.V_GBL.9014913	0.892623	0.0186656
hsa-miR-1184	PTEN	PTEN.R.V_GBL.9014918	1.18773	0.0275182
hsa-miR-1184	RAD51	Rad51.M.C_GBL.9014959	0.582166	0.0237073
hsa-miR-1184	RPS6KB1	p70S6K_pT389.R.V_GBL.9014905	0.969208	0.0872718
hsa-miR-1184	SMAD4	Smad4.M.V_GBL.9014964	0.971998	0.290566
hsa-miR-1184	STAT3	STAT3_pY705.R.V_GBL.9014927	0.995293	0.470062
hsa-miR-1184	YWHAE	X14.3.3_epsilon.M.C_GBL.9014939	0.966947	0.274367
hsa-miR-1185-5p	CTNNB1	beta.Catenin.R.V_GBL.9014836	1.42349	0.00253561
hsa-miR-1185-5p	IGF1R	IGF.1R.beta.R.C_GBL.9014883	1.17847	0.000434943
hsa-miR-1185-5p	IRS1	IRS1.R.V_GBL.9014885	0.78746	0.000861173
hsa-miR-1185-5p	MAPK14	p38_pT180_Y182.R.V_GBL.9014903	0.379047	0.00122474
hsa-miR-1185-5p	SMAD1	Smad1.R.V_GBL.9014923	1.00034	0.498376
hsa-miR-1185-5p	SRC	Src_pY416.R.C_GBL.9014925	1.0468	0.255587
hsa-miR-1225-3p	BAK1	Bak.R.C_GBL.9014832	0.91946	0.0919122
hsa-miR-1225-3p	CDH2	N.Cadherin.R.V_GBL.9014893	0.89012	0.0405687
hsa-miR-1225-3p	CDKN1A	p21.R.C_GBL.9014898	1.1392	0.04472
hsa-miR-1225-3p	COL6A1	Collagen.VI.R.V_GBL.9014978	0.92079	0.0915117
hsa-miR-1225-3p	CTNNA1	alpha.Catenin.M.V_GBL.9014941	0.691738	0.307593
hsa-miR-1225-3p	CTNNB1	beta.Catenin.R.V_GBL.9014836	0.841291	0.0345086
hsa-miR-1225-3p	ERRFI1	MIG.6.M.V_GBL.9014987	1.1773	0.0350751
hsa-miR-1225-3p	GAB2	GAB2.R.V_GBL.9014875	0.922462	0.0240225
hsa-miR-1225-3p	IGF1R	IGF.1R.beta.R.C_GBL.9014883	1.20117	0.000304961
hsa-miR-1225-3p	KIT	c.Kit.R.V_GBL.9014850	0.993027	0.492269
hsa-miR-1225-3p	MAPK1	MAPK_pT202_Y204.R.V_GBL.9014888	1.14663	0.00469976
hsa-miR-1225-3p	RB1	Rb.M.V_GBL.9014952	0.978026	0.387152
hsa-miR-1225-3p	RPS6KA1	p90RSK_pT359_S363.R.C_GBL.9014907	0.915047	0.131439
hsa-miR-1225-3p	YAP1	YAP_pS127.R.C_GBL.9014935	1.04243	0.28392
hsa-miR-124-3p	AKT1S1	PRAS40_pT246.R.V_GBL.9014915	0.923275	0.175117
hsa-miR-124-3p	AKT2	Akt_pS473.R.V_GBL.9014825	0.65668	0.0202773
hsa-miR-124-3p	AKT3	Akt_pS473.R.V_GBL.9014825	0.65668	0.0202773
hsa-miR-124-3p	AR	AR.R.V_GBL.9014831	1.05824	0.174726
hsa-miR-124-3p	BCL2L11	Bim.R.V_GBL.9014838	1.03879	0.232132
hsa-miR-124-3p	BECN1	Beclin.G.V_GBL.9014969	1.07056	0.206086
hsa-miR-124-3p	CAV1	Caveolin.1.R.V_GBL.9014842	0.361385	0.00450147
hsa-miR-124-3p	CDH2	N.Cadherin.R.V_GBL.9014893	1.05252	0.151956
hsa-miR-124-3p	CTNNB1	beta.Catenin.R.V_GBL.9014836	0.915172	0.117031
hsa-miR-124-3p	ERBB3	HER3_pY1298.R.C_GBL.9014880	0.887763	0.0391226
hsa-miR-124-3p	ESR1	ER.alpha.R.V_GBL.9014870	0.595668	0.112147
hsa-miR-124-3p	FOXO3	FOXO3a.R.C_GBL.9014874	0.829314	0.0707206
hsa-miR-124-3p	GATA3	GATA3.M.V_GBL.9014953	1.08811	0.0404952
hsa-miR-124-3p	GSK3B	GSK3alpha.beta_pS21_S9.R.V_GBL.9014876	0.878618	0.0542854
hsa-miR-124-3p	MAPK1	MAPK_pT202_Y204.R.V_GBL.9014888	1.10193	0.0127066
hsa-miR-124-3p	MAPK14	p38_pT180_Y182.R.V_GBL.9014903	0.248641	0.000699831
hsa-miR-124-3p	PEA15	Pea.15.R.V_GBL.9014911	1.08612	0.199805
hsa-miR-124-3p	PIK3CA	PI3K.p110.alpha.R.C_GBL.9014912	0.929337	0.188462
hsa-miR-124-3p	PIK3R1	PI3K.p85.R.V_GBL.9014913	1.19327	0.00379455
hsa-miR-124-3p	RPS6KA1	p90RSK_pT359_S363.R.C_GBL.9014907	0.690403	0.00765296
hsa-miR-124-3p	RPS6KB1	p70S6K_pT389.R.V_GBL.9014905	0.765737	0.000441404
hsa-miR-124-3p	SMAD4	Smad4.M.V_GBL.9014964	1.03395	0.254508
hsa-miR-124-3p	SNAI2	Snail.M.C_GBL.9014965	1.20399	0.205115
hsa-miR-124-3p	STAT3	STAT3_pY705.R.V_GBL.9014927	0.860217	0.0469839
hsa-miR-124-3p	VASP	VASP.R.C_GBL.9014877	1.2301	0.0188541
hsa-miR-124-3p	YAP1	YAP.R.V_GBL.9014936	0.922653	0.149781
hsa-miR-1245a	BCL2L11	Bim.R.V_GBL.9014838	1.06449	0.129256
hsa-miR-1245a	CAV1	Caveolin.1.R.V_GBL.9014842	0.476042	0.00780418
hsa-miR-1245a	FOXO3	FOXO3a.R.C_GBL.9014874	0.851905	0.0917915
hsa-miR-1245a	GATA3	GATA3.M.V_GBL.9014953	0.967103	0.202339
hsa-miR-1245a	GSK3B	GSK3.alpha.beta.M.V_GBL.9014954	0.66195	0.000824275
hsa-miR-1245a	PARK7	DJ.1.R.C_GBL.9014860	0.949567	0.277349
hsa-miR-1245a	SRC	Src_pY527.R.V_GBL.9014926	1.08166	0.309517
hsa-miR-125a-5p	AKT1S1	PRAS40_pT246.R.V_GBL.9014915	1.16734	0.0476112
hsa-miR-125a-5p	AKT3	Akt_pS473.R.V_GBL.9014825	0.606935	0.014333
hsa-miR-125a-5p	BAK1	Bak.R.C_GBL.9014832	0.996667	0.473863
hsa-miR-125a-5p	BCL2	Bcl.2.M.V_GBL.9014998	1.11787	0.224932
hsa-miR-125a-5p	CTNNB1	beta.Catenin.R.V_GBL.9014836	0.940437	0.186771
hsa-miR-125a-5p	DVL3	Dvl3.R.V_GBL.9014861	1.12123	0.152217
hsa-miR-125a-5p	EIF4EBP1	X4EBP1_pT37.R.V_GBL.9014820	0.825872	0.0174469
hsa-miR-125a-5p	ERBB2	HER2.M.V_GBL.9014955	0.914774	0.0547592
hsa-miR-125a-5p	ERBB3	HER3_pY1298.R.C_GBL.9014880	1.04608	0.179579
hsa-miR-125a-5p	GAB2	GAB2.R.V_GBL.9014875	0.885478	0.00871464
hsa-miR-125a-5p	KIT	c.Kit.R.V_GBL.9014850	1.17386	0.318106
hsa-miR-125a-5p	MAPK14	p38_MAPK.R.C_GBL.9014902	0.87918	0.117201
hsa-miR-125a-5p	MAPK3	MAPK_pT202_Y204.R.V_GBL.9014888	1.26672	0.000834961
hsa-miR-125a-5p	RAF1	C.Raf_pS338.R.C_GBL.9014856	0.870834	0.236813
hsa-miR-125a-5p	RPS6KA1	p90RSK_pT359_S363.R.C_GBL.9014907	1.03357	0.312332
hsa-miR-125a-5p	SMAD4	Smad4.M.V_GBL.9014964	0.974713	0.308249
hsa-miR-125a-5p	STAT3	STAT3_pY705.R.V_GBL.9014927	0.898057	0.0877291
hsa-miR-125b-2-3p	BCL2L1	Bcl.xL.R.V_GBL.9014834	0.866634	0.100839
hsa-miR-125b-2-3p	BCL2L11	Bim.R.V_GBL.9014838	1.21902	0.00898909
hsa-miR-125b-2-3p	CDH2	N.Cadherin.R.V_GBL.9014893	0.940349	0.127259
hsa-miR-125b-2-3p	GSK3B	GSK3.alpha.beta.M.V_GBL.9014954	0.898732	0.0234233
hsa-miR-125b-2-3p	JUN	c.Jun_pS73.R.C_GBL.9014849	1.13849	0.0381051
hsa-miR-125b-2-3p	MAPT	Tau.M.C_GBL.9014968	1.87904	0.000265805
hsa-miR-125b-2-3p	MSH6	MSH6.R.C_GBL.9014892	0.907998	0.0411876
hsa-miR-125b-2-3p	PTEN	PTEN.R.V_GBL.9014918	1.41624	0.00327539
hsa-miR-125b-2-3p	PTGS2	COX.2.R.C_GBL.9014979	0.719774	0.0198714
hsa-miR-125b-2-3p	PXN	Paxillin.R.V_GBL.9014908	0.951471	0.211294
hsa-miR-125b-2-3p	SNAI2	Snail.M.C_GBL.9014965	1.08421	0.359945
hsa-miR-126-3p	FOXO3	FOXO3A_pS318_S321.R.C_GBL.9014873	0.824065	0.0803179
hsa-miR-126-3p	IRS1	IRS1.R.V_GBL.9014885	0.770663	0.000688428
hsa-miR-126-3p	MET	c.Met_pY1235.R.C_GBL.9014852	0.649181	0.000379595
hsa-miR-1285-3p	AKT2	Akt_pS473.R.V_GBL.9014825	0.66353	0.0213276
hsa-miR-1285-3p	BAK1	Bak.R.C_GBL.9014832	0.9795	0.345528
hsa-miR-1285-3p	CAV1	Caveolin.1.R.V_GBL.9014842	0.423971	0.00600843
hsa-miR-1285-3p	CTNNB1	beta.Catenin.R.V_GBL.9014836	0.696137	0.00648133
hsa-miR-1285-3p	EEF2K	eEF2K.R.V_GBL.9014863	0.744332	0.00393717
hsa-miR-1285-3p	GAB2	GAB2.R.V_GBL.9014875	0.620961	0.000274933
hsa-miR-1285-3p	GSK3B	GSK3.alpha.beta.M.V_GBL.9014954	0.888115	0.0182434
hsa-miR-1285-3p	JUN	c.Jun_pS73.R.C_GBL.9014849	1.39647	0.00234521
hsa-miR-1285-3p	MAPK3	MAPK_pT202_Y204.R.V_GBL.9014888	1.02107	0.227022
hsa-miR-1285-3p	PDK1	PDK1_pS241.R.V_GBL.9014910	1.12495	0.0969833
hsa-miR-1285-3p	PIK3R1	PI3K.p85.R.V_GBL.9014913	1.11184	0.0168216
hsa-miR-1285-3p	PRKAA1	AMPK_pT172.R.V_GBL.9014829	0.962941	0.137721
hsa-miR-1285-3p	PTEN	PTEN.R.V_GBL.9014918	1.36066	0.0049145
hsa-miR-1285-3p	RPS6KA1	p90RSK_pT359_S363.R.C_GBL.9014907	0.911737	0.124247
hsa-miR-1285-3p	STMN1	Stathmin.R.V_GBL.9014929	1.07225	0.10564
hsa-miR-1285-3p	TP53	p53.R.V_GBL.9014904	0.683591	0.183753
hsa-miR-1285-3p	YAP1	YAP.R.V_GBL.9014936	0.890885	0.0878724
hsa-miR-1285-3p	YBX1	YB.1_pS102.R.V_GBL.9014934	0.807086	0.0992699
hsa-miR-1285-3p	YWHAE	X14.3.3_epsilon.M.C_GBL.9014939	1.10986	0.0555126
hsa-miR-1289	BCL2L1	Bcl.xL.R.V_GBL.9014834	0.798062	0.045133
hsa-miR-1289	CCND1	Cyclin.D1.R.V_GBL.9014859	0.912251	0.182911
hsa-miR-1289	CTNNA1	alpha.Catenin.M.V_GBL.9014941	0.728462	0.328113
hsa-miR-1289	EGFR	EGFR_pY1173.R.C_GBL.9014865	1.05385	0.232275
hsa-miR-1289	FOXO3	FOXO3A_pS318_S321.R.C_GBL.9014873	0.882201	0.151243
hsa-miR-1289	GSK3A	GSK3alpha.beta_pS21_S9.R.V_GBL.9014876	0.973422	0.327093
hsa-miR-1289	GSK3B	GSK3alpha.beta_pS21_S9.R.V_GBL.9014876	0.973422	0.327093
hsa-miR-1289	IGF1R	IGF.1R.beta.R.C_GBL.9014883	1.35184	5.75962e-05
hsa-miR-1289	JUN	c.Jun_pS73.R.C_GBL.9014849	1.35156	0.00331046
hsa-miR-1289	PECAM1	CD31.M.V_GBL.9014946	1.11306	0.0161885
hsa-miR-1289	STAT5A	STAT5.ALPHA.R.V_GBL.9014928	0.990681	0.330743
hsa-miR-1289	TP53BP1	X53BP1.R.C_GBL.9014822	1.08867	0.134551
hsa-miR-129-5p	BECN1	Beclin.G.V_GBL.9014969	1.15719	0.0623016
hsa-miR-129-5p	CDH2	N.Cadherin.R.V_GBL.9014893	1.14856	0.0197338
hsa-miR-129-5p	ESR1	ER.alpha.R.V_GBL.9014870	0.511899	0.0812859
hsa-miR-129-5p	GSK3B	GSK3alpha.beta_pS21_S9.R.V_GBL.9014876	0.826037	0.0238518
hsa-miR-129-5p	MAPK1	MAPK_pT202_Y204.R.V_GBL.9014888	0.724828	0.000761713
hsa-miR-129-5p	MET	c.Met.M.C_GBL.9014985	1.00839	0.429924
hsa-miR-129-5p	PGR	PR.R.V_GBL.9014916	0.490113	0.128898
hsa-miR-129-5p	PIK3R1	PI3K.p85.R.V_GBL.9014913	0.882358	0.0147589
hsa-miR-129-5p	PTCH1	PTCH.R.C_GBL.9014917	1.0782	0.0531204
hsa-miR-129-5p	RPS6KB1	p70S6K.R.V_GBL.9014906	0.371775	0.00131876
hsa-miR-129-5p	SMAD1	Smad1.R.V_GBL.9014923	0.861747	0.0848822
hsa-miR-129-5p	SMAD3	Smad3.R.V_GBL.9014924	0.997578	0.485378
hsa-miR-129-5p	SMAD4	Smad4.M.V_GBL.9014964	1.04314	0.206126
hsa-miR-129-5p	SNAI2	Snail.M.C_GBL.9014965	1.14469	0.273458
hsa-miR-129-5p	STAT3	STAT3_pY705.R.V_GBL.9014927	1.10225	0.0872627
hsa-miR-129-5p	YAP1	YAP_pS127.R.C_GBL.9014935	1.14635	0.0572255
hsa-miR-129-5p	YBX1	YB.1_pS102.R.V_GBL.9014934	0.727376	0.0513282
hsa-miR-1299	CCND1	Cyclin.D1.R.V_GBL.9014859	0.897096	0.150536
hsa-miR-1299	CDH1	E.Cadherin.R.V_GBL.9014862	0.955295	0.362289
hsa-miR-1299	CDH3	P.Cadherin.R.C_GBL.9014909	0.928873	0.259094
hsa-miR-1299	IGF1R	IGF.1R.beta.R.C_GBL.9014883	1.0893	0.00328109
hsa-miR-1299	JUN	c.Jun_pS73.R.C_GBL.9014849	1.42331	0.00194085
hsa-miR-1299	KDR	VEGFR2.R.V_GBL.9014932	1.01056	0.467626
hsa-miR-1299	MAPK14	p38_MAPK.R.C_GBL.9014902	0.969975	0.368366
hsa-miR-1299	NOTCH3	Notch3.R.C_GBL.9014897	1.09266	0.230998
hsa-miR-1299	PGR	PR.R.V_GBL.9014916	0.849393	0.354147
hsa-miR-1299	RAF1	C.Raf.R.V_GBL.9014857	0.888976	0.128825
hsa-miR-1299	SMAD1	Smad1.R.V_GBL.9014923	0.883604	0.113506
hsa-miR-1299	SNAI2	Snail.M.C_GBL.9014965	1.2281	0.182039
hsa-miR-1299	SRC	Src_pY416.R.C_GBL.9014925	0.879131	0.0753287
hsa-miR-1299	STAT3	STAT3_pY705.R.V_GBL.9014927	0.899273	0.0896127
hsa-miR-1299	STMN1	Stathmin.R.V_GBL.9014929	0.951118	0.181171
hsa-miR-136-3p	AKT3	Akt_pS473.R.V_GBL.9014825	0.698055	0.027811
hsa-miR-136-3p	BCL2L1	Bcl.X.R.V_GBL.9014835	0.873476	0.034696
hsa-miR-136-3p	CCND1	Cyclin.D1.R.V_GBL.9014859	0.89416	0.144973
hsa-miR-136-3p	DVL3	Dvl3.R.V_GBL.9014861	0.910977	0.215505
hsa-miR-136-3p	GATA3	GATA3.M.V_GBL.9014953	0.959378	0.159032
hsa-miR-136-3p	GSK3B	GSK3alpha.beta_pS21_S9.R.V_GBL.9014876	0.970125	0.308158
hsa-miR-136-3p	KIT	c.Kit.R.V_GBL.9014850	0.980471	0.478362
hsa-miR-136-3p	MAPK9	JNK2.R.C_GBL.9014886	0.968072	0.415562
hsa-miR-136-3p	SMAD1	Smad1.R.V_GBL.9014923	0.828934	0.056176
hsa-miR-136-3p	STMN1	Stathmin.R.V_GBL.9014929	1.06563	0.122867
hsa-miR-136-5p	BCL2	Bcl.2.M.V_GBL.9014998	1.16584	0.1549
hsa-miR-136-5p	BECN1	Beclin.G.V_GBL.9014969	1.04531	0.29246
hsa-miR-136-5p	CAV1	Caveolin.1.R.V_GBL.9014842	1.13328	0.147539
hsa-miR-136-5p	CDH2	N.Cadherin.R.V_GBL.9014893	1.10268	0.0471095
hsa-miR-136-5p	CTNNB1	beta.Catenin.R.V_GBL.9014836	0.954026	0.239814
hsa-miR-136-5p	FN1	Fibronectin.R.C_GBL.9014872	0.854606	0.120625
hsa-miR-136-5p	FOXO3	FOXO3A_pS318_S321.R.C_GBL.9014873	0.890273	0.165536
hsa-miR-136-5p	MAPK1	MAPK_pT202_Y204.R.V_GBL.9014888	1.13133	0.00639269
hsa-miR-136-5p	NOTCH3	Notch3.R.C_GBL.9014897	0.845352	0.12747
hsa-miR-136-5p	PIK3CA	PI3K.p110.alpha.R.C_GBL.9014912	0.924472	0.174748
hsa-miR-136-5p	PIK3R1	PI3K.p85.R.V_GBL.9014913	1.02647	0.221342
hsa-miR-136-5p	PTEN	PTEN.R.V_GBL.9014918	1.02854	0.336782
hsa-miR-136-5p	RAD51	Rad51.M.C_GBL.9014959	1.09532	0.255986
hsa-miR-136-5p	XIAP	XIAP.R.C_GBL.9014933	0.786026	0.0177788
hsa-miR-136-5p	YBX1	YB.1_pS102.R.V_GBL.9014934	0.971695	0.412421
hsa-miR-145-5p	CDH2	N.Cadherin.R.V_GBL.9014893	0.945554	0.144828
hsa-miR-145-5p	ESR1	ER.alpha.R.V_GBL.9014870	0.670897	0.151151
hsa-miR-145-5p	FN1	Fibronectin.R.C_GBL.9014872	1.58824	0.00487597
hsa-miR-145-5p	IGF1R	IGF.1R.beta.R.C_GBL.9014883	1.15702	0.000635128
hsa-miR-145-5p	IRS1	IRS1.R.V_GBL.9014885	1.00047	0.49133
hsa-miR-145-5p	MAPK9	JNK2.R.C_GBL.9014886	0.910944	0.281455
hsa-miR-145-5p	NCOA3	AIB1.M.V_GBL.9014940	1.01639	0.355582
hsa-miR-145-5p	PTK2	FAK.R.C_GBL.9014871	0.736585	0.000861168
hsa-miR-145-5p	PXN	Paxillin.R.V_GBL.9014908	0.785548	0.0131792
hsa-miR-145-5p	RPS6KB1	p70S6K.R.V_GBL.9014906	0.818053	0.0371619
hsa-miR-145-5p	SMAD1	Smad1.R.V_GBL.9014923	0.844775	0.0683007
hsa-miR-145-5p	SMAD3	Smad3.R.V_GBL.9014924	0.839658	0.039005
hsa-miR-145-5p	SMAD4	Smad4.M.V_GBL.9014964	1.02932	0.282247
hsa-miR-145-5p	TP53BP1	X53BP1.R.C_GBL.9014822	1.11103	0.0944484
hsa-miR-146a-5p	CTNNB1	beta.Catenin.R.V_GBL.9014836	1.22105	0.0152499
hsa-miR-146a-5p	ERRFI1	MIG.6.M.V_GBL.9014957	0.763307	0.00295912
hsa-miR-146a-5p	FN1	Fibronectin.R.C_GBL.9014872	1.19074	0.0759942
hsa-miR-146a-5p	FOXO3	FOXO3A_pS318_S321.R.C_GBL.9014873	0.878277	0.144759
hsa-miR-146a-5p	IRS1	IRS1.R.V_GBL.9014885	0.969135	0.10824
hsa-miR-146a-5p	MAPT	Tau.M.C_GBL.9014968	1.39002	0.00287878
hsa-miR-146a-5p	NF2	NF2.R.C_GBL.9014894	0.923273	0.0533124
hsa-miR-146a-5p	SMAD4	Smad4.M.V_GBL.9014964	0.982979	0.366368
hsa-miR-146a-5p	YAP1	YAP_pS127.R.C_GBL.9014935	1.08939	0.135222
hsa-miR-147a	AKT2	Akt_pS473.R.V_GBL.9014825	0.507428	0.00783139
hsa-miR-147a	BCL2L11	Bim.R.V_GBL.9014838	1.11647	0.0434045
hsa-miR-147a	BID	Bid.R.C_GBL.9014837	0.843738	0.0265298
hsa-miR-147a	CDK1	CDK1.R.V_GBL.9014844	0.643235	0.0312301
hsa-miR-148a-3p	BCL2L11	Bim.R.V_GBL.9014838	1.25093	0.00618824
hsa-miR-148a-3p	CDKN1B	p27.R.V_GBL.9014937	0.82467	0.0887363
hsa-miR-148a-3p	ERBB3	HER3.R.V_GBL.9014881	0.874051	0.0808692
hsa-miR-148a-3p	ERRFI1	MIG.6.M.V_GBL.9014957	0.887986	0.0224267
hsa-miR-148a-3p	ESR1	ER.alpha.R.V_GBL.9014870	0.537536	0.089566
hsa-miR-148a-3p	GSK3A	GSK3.alpha.beta.M.V_GBL.9014954	0.983396	0.314623
hsa-miR-148a-3p	IRS1	IRS1.R.V_GBL.9014885	0.80797	0.00115969
hsa-miR-148a-3p	KIT	c.Kit.R.V_GBL.9014850	1.08844	0.403451
hsa-miR-148a-3p	MET	c.Met_pY1235.R.C_GBL.9014852	0.845874	0.00416676
hsa-miR-148a-3p	PEA15	Pea.15.R.V_GBL.9014911	0.991006	0.462492
hsa-miR-148a-3p	PIK3CA	PI3K.p110.alpha.R.C_GBL.9014912	0.915983	0.153151
hsa-miR-148a-3p	PIK3R1	PI3K.p85.R.V_GBL.9014913	1.18703	0.0041646
hsa-miR-148a-3p	PRKAA1	AMPK_pT172.R.V_GBL.9014829	0.739187	0.00128979
hsa-miR-148a-3p	PTEN	PTEN.R.V_GBL.9014918	0.910433	0.120268
hsa-miR-148a-3p	RPS6KB1	p70S6K.R.V_GBL.9014906	1.00749	0.459371
hsa-miR-148b-3p	BCL2L11	Bim.R.V_GBL.9014838	1.4135	0.00148745
hsa-miR-148b-3p	CDKN1B	p27.R.V_GBL.9014937	0.738368	0.0395237
hsa-miR-148b-3p	ERBB3	HER3_pY1298.R.C_GBL.9014880	1.02267	0.315955
hsa-miR-148b-3p	ERRFI1	MIG.6.M.V_GBL.9014957	0.845942	0.00980283
hsa-miR-148b-3p	ESR1	ER.alpha_pS118.R.V_GBL.9014869	1.09247	0.00558939
hsa-miR-148b-3p	IRS1	IRS1.R.V_GBL.9014885	0.774661	0.000725043
hsa-miR-148b-3p	KIT	c.Kit.R.V_GBL.9014850	0.80508	0.298922
hsa-miR-148b-3p	MET	c.Met_pY1235.R.C_GBL.9014852	0.897305	0.0126954
hsa-miR-148b-3p	PEA15	Pea.15.R.V_GBL.9014911	0.868266	0.115506
hsa-miR-148b-3p	PIK3CA	PI3K.p110.alpha.R.C_GBL.9014912	0.807827	0.0335412
hsa-miR-148b-3p	PIK3R1	PI3K.p85.R.V_GBL.9014913	0.920482	0.0385001
hsa-miR-148b-3p	PRKAA1	AMPK.alpha.R.C_GBL.9014828	0.704429	0.0341167
hsa-miR-148b-3p	PTEN	PTEN.R.V_GBL.9014918	0.931517	0.172895
hsa-miR-148b-3p	RPS6KB1	p70S6K.R.V_GBL.9014906	0.918204	0.15647
hsa-miR-149-3p	AKT1S1	PRAS40_pT246.R.V_GBL.9014915	0.767758	0.0221704
hsa-miR-149-3p	AKT2	Akt_pS473.R.V_GBL.9014825	0.468187	0.00634027
hsa-miR-149-3p	AR	AR.R.V_GBL.9014831	0.981152	0.372057
hsa-miR-149-3p	BAX	Bax.R.V_GBL.9014833	1.24117	0.0012133
hsa-miR-149-3p	BCL2L11	Bim.R.V_GBL.9014838	1.35819	0.00225552
hsa-miR-149-3p	COL6A1	Collagen.VI.R.V_GBL.9014978	1.20277	0.0107805
hsa-miR-149-3p	CTNNA1	alpha.Catenin.M.V_GBL.9014941	0.821801	0.383903
hsa-miR-149-3p	ERCC1	ERCC1.M.C_GBL.9014951	0.985509	0.415703
hsa-miR-149-3p	ESR1	ER.alpha.R.V_GBL.9014870	0.454517	0.0657774
hsa-miR-149-3p	GSK3A	GSK3.alpha.beta.M.V_GBL.9014954	0.556645	0.000369962
hsa-miR-149-3p	MAPT	Tau.M.C_GBL.9014968	1.69682	0.000529248
hsa-miR-149-3p	NF2	NF2.R.C_GBL.9014894	0.925394	0.0565197
hsa-miR-149-3p	NOTCH3	Notch3.R.C_GBL.9014897	1.05338	0.330561
hsa-miR-149-3p	PRKAA1	AMPK.alpha.R.C_GBL.9014828	1.00615	0.478656
hsa-miR-149-3p	PRKCA	PKC.alpha_pS657.R.V_GBL.9014914	0.820804	0.00439819
hsa-miR-149-3p	PTK2	FAK.pY397_GBL.9014963	1.06711	0.0757501
hsa-miR-149-3p	PXN	Paxillin.R.V_GBL.9014908	0.881034	0.0539175
hsa-miR-149-3p	RAD50	Rad50.M.C_GBL.9014944	0.986695	0.113633
hsa-miR-149-3p	RAF1	C.Raf.R.V_GBL.9014857	0.85267	0.080733
hsa-miR-149-3p	SMAD3	Smad3.R.V_GBL.9014924	0.987607	0.425833
hsa-miR-149-3p	STAT3	STAT3_pY705.R.V_GBL.9014927	1.1767	0.0274485
hsa-miR-149-3p	TP53	p53.R.V_GBL.9014904	0.718217	0.207694
hsa-miR-149-3p	TP53BP1	X53BP1.R.C_GBL.9014822	0.989539	0.44168
hsa-miR-149-3p	YWHAE	X14.3.3_epsilon.M.C_GBL.9014939	1.08144	0.0977335
hsa-miR-150-3p	ACACA	ACC1.R.C_GBL.9014824	0.682646	0.00147792
hsa-miR-150-3p	BCL2	Bcl.2.M.V_GBL.9014998	0.87165	0.20745
hsa-miR-150-3p	CAV1	Caveolin.1.R.V_GBL.9014842	0.814293	0.0880364
hsa-miR-150-3p	CDH2	N.Cadherin.R.V_GBL.9014893	1.08309	0.0725769
hsa-miR-150-3p	ERBB3	HER3_pY1298.R.C_GBL.9014880	1.17709	0.0127006
hsa-miR-150-3p	FN1	Fibronectin.R.C_GBL.9014872	0.767621	0.0511612
hsa-miR-150-3p	GSK3B	GSK3alpha.beta_pS21_S9.R.V_GBL.9014876	0.918665	0.113302
hsa-miR-150-3p	IGF1R	IGF.1R.beta.R.C_GBL.9014883	1.033	0.0436682
hsa-miR-150-3p	NOTCH3	Notch3.R.C_GBL.9014897	0.938674	0.308268
hsa-miR-150-3p	PTK2	FAK.R.C_GBL.9014871	0.88333	0.00879994
hsa-miR-150-3p	SMAD4	Smad4.M.V_GBL.9014964	1.00924	0.425896
hsa-miR-150-3p	VASP	VASP.R.C_GBL.9014877	1.01313	0.42592
hsa-miR-150-3p	WWTR1	TAZ_pS89.R.C_GBL.9014930	1.00477	0.474297
hsa-miR-151a-3p	AKT3	Akt_pS473.R.V_GBL.9014825	0.453195	0.0058691
hsa-miR-151a-3p	BCL2	Bcl.2.M.V_GBL.9014998	0.912724	0.283345
hsa-miR-151a-3p	ERRFI1	MIG.6.M.V_GBL.9014987	0.858078	0.0570887
hsa-miR-151a-3p	ESR1	ER.alpha.R.V_GBL.9014870	0.899475	0.364779
hsa-miR-151a-3p	FOXO3	FOXO3A_pS318_S321.R.C_GBL.9014873	0.871338	0.133995
hsa-miR-151a-3p	NF2	NF2.R.C_GBL.9014894	0.922904	0.0527769
hsa-miR-151a-3p	PTEN	PTEN.R.V_GBL.9014918	1.30567	0.00777764
hsa-miR-153	AKT3	Akt_pS473.R.V_GBL.9014825	0.572535	0.0114873
hsa-miR-153	BCL2	Bcl.2.M.V_GBL.9014998	0.923865	0.307333
hsa-miR-153	CDKN1B	p27.R.V_GBL.9014994	1.004	0.478683
hsa-miR-153	FOXO3	FOXO3a.R.C_GBL.9014874	0.823651	0.066362
hsa-miR-153	IGF1R	IGF.1R.beta.R.C_GBL.9014883	0.960117	0.0282136
hsa-miR-153	MET	c.Met_pY1235.R.C_GBL.9014852	1.12144	0.00808905
hsa-miR-153	PEA15	Pea.15.R.V_GBL.9014911	1.15036	0.0928951
hsa-miR-153	PIK3R1	PI3K.p85.R.V_GBL.9014913	0.867126	0.0106984
hsa-miR-153	PRKAA1	AMPK.alpha.R.C_GBL.9014828	0.870758	0.154583
hsa-miR-153	PTCH1	PTCH.R.C_GBL.9014917	1.04538	0.138197
hsa-miR-153	PTEN	PTEN.R.V_GBL.9014918	1.22893	0.0167829
hsa-miR-153	RPS6KB1	p70S6K_pT389.R.V_GBL.9014905	0.630311	0.000113639
hsa-miR-153	SRC	Src.M.V_GBL.9014966	0.639773	0.0136206
hsa-miR-153	YBX1	YB.1_pS102.R.V_GBL.9014934	1.04471	0.364208
hsa-miR-15b-5p	ACACA	ACC_pS79.R.V_GBL.9014843	0.827091	0.0491612
hsa-miR-15b-5p	AKT3	Akt_pT308.R.V_GBL.9014971	0.630275	0.220279
hsa-miR-15b-5p	BCL2	Bcl.2.M.V_GBL.9014998	0.825947	0.145295
hsa-miR-15b-5p	CCND1	Cyclin.D1.R.V_GBL.9014859	1.02103	0.407714
hsa-miR-15b-5p	CCNE1	Cyclin_E1.M.V_GBL.9014950	0.788587	0.0109225
hsa-miR-15b-5p	CHEK1	Chk1_pS345.R.C_GBL.9014845	0.891882	0.0853304
hsa-miR-15b-5p	CTNNA1	alpha.Catenin.M.V_GBL.9014941	0.788604	0.363512
hsa-miR-15b-5p	CTNNB1	beta.Catenin.R.V_GBL.9014836	0.994931	0.467429
hsa-miR-15b-5p	EIF4E	eIF4E.R.V_GBL.9014868	0.815119	0.0600476
hsa-miR-15b-5p	GSK3B	GSK3.alpha.beta.M.V_GBL.9014954	1.00242	0.471276
hsa-miR-15b-5p	IGF1R	IGF.1R.beta.R.C_GBL.9014883	1.13953	0.000899206
hsa-miR-15b-5p	IRS1	IRS1.R.V_GBL.9014885	1.02937	0.117064
hsa-miR-15b-5p	KDR	VEGFR2.R.V_GBL.9014932	1.12947	0.179333
hsa-miR-15b-5p	MAP2K1	MEK1.R.V_GBL.9014890	0.812724	0.00906596
hsa-miR-15b-5p	MAPK9	JNK2.R.C_GBL.9014886	0.766442	0.0937886
hsa-miR-15b-5p	NF2	NF2.R.C_GBL.9014894	0.902961	0.0315685
hsa-miR-15b-5p	PIK3R1	PI3K.p85.R.V_GBL.9014913	0.911834	0.0303016
hsa-miR-15b-5p	PTCH1	PTCH.R.C_GBL.9014917	0.803604	0.00523983
hsa-miR-15b-5p	RAD50	Rad50.M.C_GBL.9014944	0.972941	0.027089
hsa-miR-15b-5p	RAF1	C.Raf.R.V_GBL.9014857	0.709395	0.0177641
hsa-miR-15b-5p	RPS6KB1	p70S6K.R.V_GBL.9014906	0.939668	0.21895
hsa-miR-15b-5p	SMAD3	Smad3.R.V_GBL.9014924	0.866388	0.0578308
hsa-miR-15b-5p	VASP	VASP.R.C_GBL.9014877	0.996665	0.481023
hsa-miR-15b-5p	YAP1	YAP.R.V_GBL.9014936	0.946393	0.22483
hsa-miR-15b-5p	YWHAE	X14.3.3_epsilon.M.C_GBL.9014939	0.89515	0.0610833
hsa-miR-17-5p	AKT3	Akt_pS473.R.V_GBL.9014825	0.827086	0.0897456
hsa-miR-17-5p	BCL2L11	Bim.R.V_GBL.9014838	1.13028	0.0336625
hsa-miR-17-5p	BECN1	Beclin.G.V_GBL.9014969	0.844394	0.0635763
hsa-miR-17-5p	BID	Bid.R.C_GBL.9014837	0.910892	0.0873446
hsa-miR-17-5p	CASP7	Caspase.7_cleavedD198.R.C_GBL.9014840	0.902979	0.281904
hsa-miR-17-5p	CAV1	Caveolin.1.R.V_GBL.9014842	0.957381	0.356432
hsa-miR-17-5p	CCND1	Cyclin.D1.R.V_GBL.9014859	0.771721	0.0349298
hsa-miR-17-5p	CDKN1A	p21.R.C_GBL.9014898	0.95062	0.222066
hsa-miR-17-5p	CDKN1B	p27_pT157.R.C_GBL.9014899	0.993255	0.461443
hsa-miR-17-5p	ERBB3	HER3_pY1298.R.C_GBL.9014880	0.896952	0.0472632
hsa-miR-17-5p	ESR1	ER.alpha.R.V_GBL.9014870	0.872649	0.331763
hsa-miR-17-5p	MAP2K1	MEK1.R.V_GBL.9014890	0.939156	0.111783
hsa-miR-17-5p	MAPK1	MAPK_pT202_Y204.R.V_GBL.9014888	0.907862	0.0165338
hsa-miR-17-5p	MAPK9	JNK2.R.C_GBL.9014886	0.826896	0.148319
hsa-miR-17-5p	MET	c.Met.M.C_GBL.9014985	0.985652	0.381953
hsa-miR-17-5p	MYC	c.Myc.R.C_GBL.9014853	0.900019	0.00712066
hsa-miR-17-5p	NCOA3	AIB1.M.V_GBL.9014940	0.988967	0.40087
hsa-miR-17-5p	PIK3R1	PI3K.p85.R.V_GBL.9014913	0.974614	0.229854
hsa-miR-17-5p	PTEN	PTEN.R.V_GBL.9014918	1.13055	0.0616601
hsa-miR-17-5p	PTK2	FAK.R.C_GBL.9014871	0.97856	0.223037
hsa-miR-17-5p	RB1	Rb.M.V_GBL.9014952	0.875391	0.0866615
hsa-miR-17-5p	RPS6KA1	p90RSK_pT359_S363.R.C_GBL.9014907	0.968677	0.323565
hsa-miR-17-5p	SMAD1	Smad1.R.V_GBL.9014923	0.821052	0.0511118
hsa-miR-17-5p	SMAD4	Smad4.M.V_GBL.9014964	0.94255	0.147595
hsa-miR-17-5p	SRC	Src_pY416.R.C_GBL.9014925	0.750329	0.0143229
hsa-miR-17-5p	STAT3	STAT3_pY705.R.V_GBL.9014927	1.0272	0.334756
hsa-miR-17-5p	VASP	VASP.R.C_GBL.9014877	1.01006	0.443056
hsa-miR-17-5p	XIAP	XIAP.R.C_GBL.9014933	0.746281	0.0113938
hsa-miR-17-5p	YAP1	YAP_pS127.R.C_GBL.9014935	1.01256	0.43093
hsa-miR-181b-5p	AKT3	Akt_pS473.R.V_GBL.9014825	0.581676	0.0121664
hsa-miR-181b-5p	BCL2	Bcl.2.M.V_GBL.9014998	0.859986	0.189477
hsa-miR-181b-5p	BCL2L11	Bim.R.V_GBL.9014838	1.22053	0.00882332
hsa-miR-181b-5p	CCNB1	Cyclin.B1.R.V_GBL.9014858	0.988307	0.410036
hsa-miR-181b-5p	CDK1	CDK1.R.V_GBL.9014844	0.93614	0.319735
hsa-miR-181b-5p	CDKN1B	p27_pT157.R.C_GBL.9014899	0.033038	0.000316835
hsa-miR-181b-5p	CTNNA1	alpha.Catenin.M.V_GBL.9014941	0.704674	0.314721
hsa-miR-181b-5p	ESR1	ER.alpha.R.V_GBL.9014870	0.763727	0.219038
hsa-miR-181b-5p	IRS1	IRS1.R.V_GBL.9014885	0.975655	0.152999
hsa-miR-181b-5p	MAP2K1	MEK1_pS217_S221.R.V_GBL.9014889	0.887308	0.00136845
hsa-miR-181b-5p	MAPK1	MAPK_pT202_Y204.R.V_GBL.9014888	0.787982	0.00163387
hsa-miR-181b-5p	MAPT	Tau.M.C_GBL.9014968	0.567748	0.00214159
hsa-miR-181b-5p	MET	c.Met_pY1235.R.C_GBL.9014852	0.862992	0.0057984
hsa-miR-181b-5p	PIK3R1	PI3K.p85.R.V_GBL.9014913	1.01178	0.360383
hsa-miR-181b-5p	PTCH1	PTCH.R.C_GBL.9014917	0.975887	0.265742
hsa-miR-181b-5p	PTEN	PTEN.R.V_GBL.9014918	1.22341	0.0178654
hsa-miR-181b-5p	RPS6KB1	p70S6K.R.V_GBL.9014906	0.991657	0.454791
hsa-miR-181b-5p	SMAD3	Smad3.R.V_GBL.9014924	1.05424	0.219221
hsa-miR-181b-5p	SNAI2	Snail.M.C_GBL.9014965	1.06976	0.382779
hsa-miR-181b-5p	STAT3	STAT3_pY705.R.V_GBL.9014927	1.18539	0.0244282
hsa-miR-181b-5p	XIAP	XIAP.R.C_GBL.9014933	0.899491	0.0925896
hsa-miR-181c-3p	CASP3	Caspase.3_active.R.C_GBL.9014991	0.894627	0.188982
hsa-miR-181c-3p	CASP8	Caspase.8.M.C_GBL.9014945	0.794294	0.0122367
hsa-miR-181c-3p	ESR1	ER.alpha.R.V_GBL.9014870	0.928885	0.402858
hsa-miR-181c-3p	FOXO3	FOXO3A_pS318_S321.R.C_GBL.9014873	0.831621	0.0869712
hsa-miR-181c-3p	GSK3B	GSK3alpha.beta_pS21_S9.R.V_GBL.9014876	1.02938	0.310948
hsa-miR-181c-3p	IRS1	IRS1.R.V_GBL.9014885	0.73982	0.000474244
hsa-miR-181c-3p	SMAD1	Smad1.R.V_GBL.9014923	0.829046	0.0562519
hsa-miR-181c-3p	TP53	p53.R.V_GBL.9014904	0.977926	0.47289
hsa-miR-181c-3p	YWHAE	X14.3.3_epsilon.M.C_GBL.9014939	0.97695	0.335253
hsa-miR-185-3p	AKT1S1	PRAS40_pT246.R.V_GBL.9014915	0.889253	0.104662
hsa-miR-185-3p	DVL3	Dvl3.R.V_GBL.9014861	0.967498	0.381088
hsa-miR-185-3p	ERBB3	HER3_pY1298.R.C_GBL.9014880	0.921439	0.0813806
hsa-miR-185-3p	GSK3A	GSK3alpha.beta_pS21_S9.R.V_GBL.9014876	1.09871	0.0814538
hsa-miR-185-3p	IGF1R	IGF.1R.beta.R.C_GBL.9014883	0.696007	8.91439e-05
hsa-miR-185-3p	IRS1	IRS1.R.V_GBL.9014885	0.951523	0.0457813
hsa-miR-185-3p	MAPK1	MAPK_pT202_Y204.R.V_GBL.9014888	1.10329	0.0122672
hsa-miR-185-3p	MAPT	Tau.M.C_GBL.9014968	1.31433	0.00530461
hsa-miR-185-3p	MET	c.Met_pY1235.R.C_GBL.9014852	0.844318	0.00404999
hsa-miR-185-3p	NCOA3	AIB1.M.V_GBL.9014940	1.11307	0.0336472
hsa-miR-185-3p	NF2	NF2.R.C_GBL.9014894	0.947618	0.108476
hsa-miR-185-3p	NOTCH3	Notch3.R.C_GBL.9014897	0.959262	0.368035
hsa-miR-185-3p	PECAM1	CD31.M.V_GBL.9014946	1.00082	0.489977
hsa-miR-185-3p	PRKCA	PKC.alpha_pS657.R.V_GBL.9014914	0.850122	0.00723736
hsa-miR-185-3p	PTEN	PTEN.R.V_GBL.9014918	1.40738	0.00348253
hsa-miR-185-3p	RAB25	Rab25.R.C_GBL.9014919	1.03874	0.322997
hsa-miR-185-3p	RAF1	C.Raf.R.V_GBL.9014857	0.84614	0.0744576
hsa-miR-185-3p	SMAD3	Smad3.R.V_GBL.9014924	0.962831	0.292264
hsa-miR-185-3p	VASP	VASP.R.C_GBL.9014877	0.996941	0.482592
hsa-miR-185-3p	YAP1	YAP_pS127.R.C_GBL.9014935	1.03658	0.30983
hsa-miR-18a-3p	BCL2L1	Bcl.xL.R.V_GBL.9014834	0.855668	0.0879995
hsa-miR-18a-3p	BCL2L11	Bim.R.V_GBL.9014838	1.08009	0.091299
hsa-miR-18a-3p	CASP7	Caspase.7_cleavedD198.R.C_GBL.9014840	0.873618	0.230661
hsa-miR-18a-3p	CAV1	Caveolin.1.R.V_GBL.9014842	0.703679	0.0335524
hsa-miR-18a-3p	CDK1	CDK1.R.V_GBL.9014844	0.957984	0.37758
hsa-miR-18a-3p	CDKN1B	p27_pT157.R.C_GBL.9014899	0.994321	0.467516
hsa-miR-18a-3p	CTNNB1	beta.Catenin.R.V_GBL.9014836	1.02116	0.367769
hsa-miR-18a-3p	EEF2K	eEF2K.R.V_GBL.9014863	0.848315	0.016312
hsa-miR-18a-3p	ESR1	ER.alpha.R.V_GBL.9014870	0.900859	0.366529
hsa-miR-18a-3p	FOXO3	FOXO3a.R.C_GBL.9014874	0.828368	0.06997
hsa-miR-18a-3p	GSK3A	GSK3.alpha.beta.M.V_GBL.9014954	0.934896	0.0632238
hsa-miR-18a-3p	GSK3B	GSK3.alpha.beta.M.V_GBL.9014954	0.934896	0.0632238
hsa-miR-18a-3p	NF2	NF2.R.C_GBL.9014894	0.943661	0.0961204
hsa-miR-18a-3p	NOTCH3	Notch3.R.C_GBL.9014897	0.906737	0.229683
hsa-miR-18a-3p	PEA15	Pea.15.R.V_GBL.9014911	0.92435	0.226428
hsa-miR-18a-3p	RPS6KB1	p70S6K.R.V_GBL.9014906	1.01969	0.394934
hsa-miR-18a-3p	SMAD1	Smad1.R.V_GBL.9014923	0.842524	0.0664002
hsa-miR-18a-3p	SMAD3	Smad3.R.V_GBL.9014924	0.854932	0.0486458
hsa-miR-18a-3p	STAT3	STAT3_pY705.R.V_GBL.9014927	1.10057	0.0898635
hsa-miR-18a-3p	VASP	VASP.R.C_GBL.9014877	0.944538	0.226726
hsa-miR-18a-3p	XIAP	XIAP.R.C_GBL.9014933	0.944099	0.205474
hsa-miR-18a-5p	AKT3	Akt_pS473.R.V_GBL.9014825	0.514506	0.00814758
hsa-miR-18a-5p	BCL2L11	Bim.R.V_GBL.9014838	1.5471	0.000654436
hsa-miR-18a-5p	CCND1	Cyclin.D1.R.V_GBL.9014859	1.03105	0.365937
hsa-miR-18a-5p	CTNNA1	alpha.Catenin.M.V_GBL.9014941	0.653299	0.287082
hsa-miR-18a-5p	ESR1	ER.alpha_pS118.R.V_GBL.9014869	1.02283	0.129936
hsa-miR-18a-5p	GAB2	GAB2.R.V_GBL.9014875	0.526127	0.000141424
hsa-miR-18a-5p	GSK3B	GSK3alpha.beta_pS21_S9.R.V_GBL.9014876	0.99763	0.48376
hsa-miR-18a-5p	KIT	c.Kit.R.V_GBL.9014850	0.856924	0.347575
hsa-miR-18a-5p	LCK	Lck.R.V_GBL.9014887	1.03582	0.251936
hsa-miR-18a-5p	MET	c.Met_pY1235.R.C_GBL.9014852	0.920692	0.0245435
hsa-miR-18a-5p	NCOA3	AIB1.M.V_GBL.9014940	1.14454	0.0184851
hsa-miR-18a-5p	PIK3CA	PI3K.p110.alpha.R.C_GBL.9014912	0.794295	0.0285623
hsa-miR-18a-5p	RAF1	C.Raf.R.V_GBL.9014857	0.736414	0.0227074
hsa-miR-18a-5p	RB1	Rb_pS807_S811.R.V_GBL.9014920	0.685984	0.00846885
hsa-miR-18a-5p	RPS6KB1	p70S6K.R.V_GBL.9014906	1.12865	0.0765888
hsa-miR-18a-5p	SMAD1	Smad1.R.V_GBL.9014923	0.920588	0.188665
hsa-miR-18a-5p	TP53BP1	X53BP1.R.C_GBL.9014822	1.08793	0.136172
hsa-miR-18a-5p	WWTR1	TAZ_pS89.R.C_GBL.9014930	0.91937	0.161123
hsa-miR-18a-5p	YAP1	YAP_pS127.R.C_GBL.9014935	0.993102	0.461859
hsa-miR-18a-5p	YBX1	YB.1_pS102.R.V_GBL.9014934	0.757518	0.0652743
hsa-miR-18b-5p	AKT3	Akt_pS473.R.V_GBL.9014825	0.565863	0.0110222
hsa-miR-18b-5p	BCL2L11	Bim.R.V_GBL.9014838	1.30396	0.00360971
hsa-miR-18b-5p	CCND1	Cyclin.D1.R.V_GBL.9014859	0.946683	0.282204
hsa-miR-18b-5p	CTNNA1	alpha.Catenin.M.V_GBL.9014941	0.74534	0.337831
hsa-miR-18b-5p	ESR1	ER.alpha.R.V_GBL.9014870	0.731247	0.192483
hsa-miR-18b-5p	GAB2	GAB2.R.V_GBL.9014875	0.5458	0.000160478
hsa-miR-18b-5p	GSK3B	GSK3.alpha.beta.M.V_GBL.9014954	0.941343	0.0773534
hsa-miR-18b-5p	KIT	c.Kit.R.V_GBL.9014850	1.39204	0.161058
hsa-miR-18b-5p	MET	c.Met_pY1235.R.C_GBL.9014852	1.01963	0.242663
hsa-miR-18b-5p	NCOA3	AIB1.M.V_GBL.9014940	1.17939	0.0105056
hsa-miR-18b-5p	PIK3CA	PI3K.p110.alpha.R.C_GBL.9014912	0.91812	0.158319
hsa-miR-18b-5p	RB1	Rb_pS807_S811.R.V_GBL.9014920	0.790587	0.024297
hsa-miR-18b-5p	SNAI2	Snail.M.C_GBL.9014965	1.13297	0.288944
hsa-miR-18b-5p	WWTR1	TAZ_pS89.R.C_GBL.9014930	0.965406	0.32345
hsa-miR-18b-5p	YAP1	YAP.R.V_GBL.9014936	0.916762	0.135426
hsa-miR-18b-5p	YBX1	YB.1_pS102.R.V_GBL.9014934	0.828955	0.120401
hsa-miR-1908	AKT1	Akt_pT308.R.V_GBL.9014971	0.620513	0.214936
hsa-miR-1908	AKT1S1	PRAS40_pT246.R.V_GBL.9014915	0.844972	0.0559731
hsa-miR-1908	CTNNA1	alpha.Catenin.M.V_GBL.9014941	0.730788	0.329442
hsa-miR-1908	GATA3	GATA3.M.V_GBL.9014953	0.943717	0.0982302
hsa-miR-1908	MAPT	Tau.M.C_GBL.9014968	1.37635	0.00318795
hsa-miR-1908	NF2	NF2.R.C_GBL.9014894	0.919702	0.0483956
hsa-miR-190a	CAV1	Caveolin.1.R.V_GBL.9014842	1.46938	0.010516
hsa-miR-190a	CDH2	N.Cadherin.R.V_GBL.9014893	0.943948	0.139148
hsa-miR-190a	CDKN1B	p27.R.V_GBL.9014937	0.72838	0.0362954
hsa-miR-190a	ESR1	ER.alpha.R.V_GBL.9014870	0.753647	0.210456
hsa-miR-190a	PTCH1	PTCH.R.C_GBL.9014917	0.863387	0.0140449
hsa-miR-190a	PTEN	PTEN.R.V_GBL.9014918	1.24138	0.0146332
hsa-miR-190a	SMAD4	Smad4.M.V_GBL.9014964	0.982131	0.360131
hsa-miR-193a-3p	CCND1	Cyclin.D1.R.V_GBL.9014859	0.791244	0.0427672
hsa-miR-193a-3p	IGF1R	IGF.1R.beta.R.C_GBL.9014883	1.11693	0.00150788
hsa-miR-193a-3p	KIT	c.Kit.R.V_GBL.9014850	1.27312	0.235184
hsa-miR-193a-3p	MAPK14	p38_pT180_Y182.R.V_GBL.9014903	0.588207	0.00400238
hsa-miR-193a-3p	NF2	NF2.R.C_GBL.9014894	1.01796	0.315091
hsa-miR-193a-3p	PIK3R1	PI3K.p85.R.V_GBL.9014913	0.731254	0.00146878
hsa-miR-193a-3p	PTCH1	PTCH.R.C_GBL.9014917	1.03525	0.189219
hsa-miR-193a-3p	PTEN	PTEN.R.V_GBL.9014918	1.25987	0.0120516
hsa-miR-193a-3p	STMN1	Stathmin.R.V_GBL.9014929	0.897239	0.0548006
hsa-miR-193a-3p	VASP	VASP.R.C_GBL.9014877	1.08915	0.13059
hsa-miR-193b-3p	CCND1	Cyclin.D1.R.V_GBL.9014859	0.782535	0.039028
hsa-miR-193b-3p	GSK3B	GSK3alpha.beta_pS21_S9.R.V_GBL.9014876	0.770578	0.0117273
hsa-miR-193b-3p	KIT	c.Kit.R.V_GBL.9014850	0.821133	0.313473
hsa-miR-193b-3p	MAPK3	MAPK_pT202_Y204.R.V_GBL.9014888	0.751224	0.00102439
hsa-miR-193b-3p	PIK3R1	PI3K.p85.R.V_GBL.9014913	1.06964	0.0515089
hsa-miR-193b-3p	PTEN	PTEN.R.V_GBL.9014918	1.12894	0.0632173
hsa-miR-193b-3p	STMN1	Stathmin.R.V_GBL.9014929	0.90061	0.0587077
hsa-miR-193b-3p	VASP	VASP.R.C_GBL.9014877	1.05109	0.243279
hsa-miR-193b-5p	AKT3	Akt_pS473.R.V_GBL.9014825	0.539314	0.00939614
hsa-miR-193b-5p	CCND1	Cyclin.D1.R.V_GBL.9014859	0.942244	0.267284
hsa-miR-193b-5p	CTNNB1	beta.Catenin.R.V_GBL.9014836	0.781132	0.0156471
hsa-miR-193b-5p	ESR1	ER.alpha_pS118.R.V_GBL.9014869	0.947298	0.0246886
hsa-miR-193b-5p	FOXO3	FOXO3a.R.C_GBL.9014874	0.826016	0.0681428
hsa-miR-193b-5p	GSK3B	GSK3.alpha.beta.M.V_GBL.9014954	1.06211	0.0693786
hsa-miR-193b-5p	IGF1R	IGF.1R.beta.R.C_GBL.9014883	1.02251	0.0930531
hsa-miR-193b-5p	JUN	c.Jun_pS73.R.C_GBL.9014849	0.926642	0.126665
hsa-miR-193b-5p	MAPK3	MAPK_pT202_Y204.R.V_GBL.9014888	1.08813	0.0185269
hsa-miR-193b-5p	MET	c.Met.M.C_GBL.9014985	0.941798	0.137241
hsa-miR-193b-5p	PTCH1	PTCH.R.C_GBL.9014917	0.946644	0.108274
hsa-miR-193b-5p	PTEN	PTEN.R.V_GBL.9014918	1.28802	0.00914636
hsa-miR-193b-5p	STAT3	STAT3_pY705.R.V_GBL.9014927	1.11175	0.0741053
hsa-miR-193b-5p	VASP	VASP.R.C_GBL.9014877	1.02142	0.380921
hsa-miR-193b-5p	YBX1	YB.1_pS102.R.V_GBL.9014934	0.864608	0.165967
hsa-miR-193b-5p	YWHAE	X14.3.3_epsilon.M.C_GBL.9014939	1.02827	0.302422
hsa-miR-195-3p	BCL2	Bcl.2.M.V_GBL.9014998	0.837569	0.159073
hsa-miR-195-3p	BCL2L11	Bim.R.V_GBL.9014838	1.11721	0.0428024
hsa-miR-195-3p	BIRC2	cIAP.R.V_GBL.9014848	0.962011	0.175607
hsa-miR-195-3p	CDH2	N.Cadherin.R.V_GBL.9014893	0.95195	0.169934
hsa-miR-195-3p	CDK1	CDK1.R.V_GBL.9014844	0.807234	0.107511
hsa-miR-195-3p	CTNNB1	beta.Catenin.R.V_GBL.9014836	0.919938	0.127712
hsa-miR-195-3p	ERRFI1	MIG.6.M.V_GBL.9014957	0.955335	0.13835
hsa-miR-195-3p	FOXO3	FOXO3a.R.C_GBL.9014874	0.851592	0.0914532
hsa-miR-195-3p	KIT	c.Kit.R.V_GBL.9014850	0.99017	0.489102
hsa-miR-195-3p	MET	c.Met.M.C_GBL.9014985	0.867958	0.0282444
hsa-miR-195-3p	MSH2	MSH2.M.C_GBL.9014958	0.814686	0.0315382
hsa-miR-195-3p	MYC	c.Myc.R.C_GBL.9014853	0.916697	0.0116748
hsa-miR-195-3p	PIK3R1	PI3K.p85.R.V_GBL.9014913	0.90481	0.0251982
hsa-miR-195-3p	PRKAA1	AMPK.alpha.R.C_GBL.9014828	0.938794	0.301772
hsa-miR-195-3p	PTCH1	PTCH.R.C_GBL.9014917	0.932194	0.070812
hsa-miR-195-3p	SRC	Src_pY416.R.C_GBL.9014925	0.804467	0.0265273
hsa-miR-195-3p	YWHAE	X14.3.3_epsilon.M.C_GBL.9014939	1.00561	0.45806
hsa-miR-199b-5p	ACACA	ACC_pS79.R.V_GBL.9014843	0.90632	0.144487
hsa-miR-199b-5p	BECN1	Beclin.G.V_GBL.9014969	0.923689	0.189899
hsa-miR-199b-5p	CAV1	Caveolin.1.R.V_GBL.9014842	0.973724	0.40955
hsa-miR-199b-5p	CCND1	Cyclin.D1.R.V_GBL.9014859	0.867874	0.103914
hsa-miR-199b-5p	CDH2	N.Cadherin.R.V_GBL.9014893	0.981164	0.343609
hsa-miR-199b-5p	GSK3B	GSK3alpha.beta_pS21_S9.R.V_GBL.9014876	0.830033	0.0252492
hsa-miR-199b-5p	JUN	c.Jun_pS73.R.C_GBL.9014849	0.959952	0.248749
hsa-miR-199b-5p	KIT	c.Kit.R.V_GBL.9014850	0.899603	0.390886
hsa-miR-199b-5p	MAPK9	JNK2.R.C_GBL.9014886	1.0278	0.426266
hsa-miR-199b-5p	MET	c.Met_pY1235.R.C_GBL.9014852	0.83465	0.00341315
hsa-miR-199b-5p	PTK2	FAK.R.C_GBL.9014871	0.951718	0.0717228
hsa-miR-199b-5p	PXN	Paxillin.R.V_GBL.9014908	0.705604	0.00557059
hsa-miR-199b-5p	RB1	Rb_pS807_S811.R.V_GBL.9014920	0.891191	0.0964662
hsa-miR-199b-5p	RPS6KB1	p70S6K_pT389.R.V_GBL.9014905	1.16354	0.00127122
hsa-miR-199b-5p	VASP	VASP.R.C_GBL.9014877	0.866592	0.0653419
hsa-miR-19a-3p	BCL2L11	Bim.R.V_GBL.9014838	1.16186	0.0198755
hsa-miR-19a-3p	CCND1	Cyclin.D1.R.V_GBL.9014859	0.833964	0.0689196
hsa-miR-19a-3p	ERBB3	HER3.R.V_GBL.9014881	0.892494	0.106398
hsa-miR-19a-3p	ERRFI1	MIG.6.M.V_GBL.9014987	1.00393	0.477543
hsa-miR-19a-3p	ESR1	ER.alpha.R.V_GBL.9014870	0.751402	0.208587
hsa-miR-19a-3p	GSK3B	GSK3.alpha.beta.M.V_GBL.9014954	0.999271	0.491354
hsa-miR-19a-3p	KIT	c.Kit.R.V_GBL.9014850	0.77289	0.271223
hsa-miR-19a-3p	MAPK1	MAPK_pT202_Y204.R.V_GBL.9014888	0.896366	0.0121598
hsa-miR-19a-3p	MAPK14	p38_pT180_Y182.R.V_GBL.9014903	0.789157	0.0239926
hsa-miR-19a-3p	NOTCH1	Notch1.R.V_GBL.9014896	1.00064	0.495226
hsa-miR-19a-3p	PEA15	Pea.15.R.V_GBL.9014911	1.03156	0.371706
hsa-miR-19a-3p	PIK3CA	PI3K.p110.alpha.R.C_GBL.9014912	0.852304	0.0596445
hsa-miR-19a-3p	PRKAA1	AMPK_pT172.R.V_GBL.9014829	0.928713	0.041629
hsa-miR-19a-3p	PRKCA	PKC.alpha_pS657.R.V_GBL.9014914	1.02725	0.21057
hsa-miR-19a-3p	PTEN	PTEN.R.V_GBL.9014918	0.853516	0.0485045
hsa-miR-19a-3p	RAF1	C.Raf.R.V_GBL.9014857	0.703665	0.0168977
hsa-miR-19a-3p	SMAD4	Smad4.M.V_GBL.9014964	0.981954	0.358839
hsa-miR-19a-3p	YWHAE	X14.3.3_epsilon.M.C_GBL.9014939	0.998426	0.488212
hsa-miR-19b-1-5p	ACACA	ACC_pS79.R.V_GBL.9014843	1.11478	0.106712
hsa-miR-19b-1-5p	ACACB	ACC_pS79.R.V_GBL.9014843	1.11478	0.106712
hsa-miR-19b-1-5p	AKT3	Akt_pS473.R.V_GBL.9014825	0.551762	0.0101168
hsa-miR-19b-1-5p	CAV1	Caveolin.1.R.V_GBL.9014842	1.11634	0.174998
hsa-miR-19b-1-5p	CCND1	Cyclin.D1.R.V_GBL.9014859	0.932326	0.236226
hsa-miR-19b-1-5p	CDH2	N.Cadherin.R.V_GBL.9014893	1.13815	0.0236501
hsa-miR-19b-1-5p	ESR1	ER.alpha_pS118.R.V_GBL.9014869	0.971146	0.0890963
hsa-miR-19b-1-5p	FOXO3	FOXO3a.R.C_GBL.9014874	0.791837	0.0470761
hsa-miR-19b-1-5p	GSK3B	GSK3alpha.beta_pS21_S9.R.V_GBL.9014876	0.826527	0.0240179
hsa-miR-19b-1-5p	INPP4B	INPP4B.G.C_GBL.9014970	1.10396	0.0576016
hsa-miR-19b-1-5p	IRS1	IRS1.R.V_GBL.9014885	0.865683	0.00326215
hsa-miR-19b-1-5p	PGR	PR.R.V_GBL.9014916	0.939561	0.43966
hsa-miR-19b-1-5p	PIK3CA	PI3K.p110.alpha.R.C_GBL.9014912	0.880159	0.0887906
hsa-miR-19b-1-5p	SNAI2	Snail.M.C_GBL.9014965	1.24286	0.169169
hsa-miR-19b-1-5p	TP53BP1	X53BP1.R.C_GBL.9014822	1.00708	0.460428
hsa-miR-19b-1-5p	XIAP	XIAP.R.C_GBL.9014933	0.643412	0.00446999
hsa-miR-19b-3p	BCL2L11	Bim.R.V_GBL.9014838	1.22649	0.0082051
hsa-miR-19b-3p	CCND1	Cyclin.D1.R.V_GBL.9014859	0.906397	0.169652
hsa-miR-19b-3p	CLDN7	Claudin.7.R.V_GBL.9014851	0.994303	0.449154
hsa-miR-19b-3p	ERBB3	HER3.R.V_GBL.9014881	0.947004	0.246745
hsa-miR-19b-3p	ERRFI1	MIG.6.M.V_GBL.9014957	1.0065	0.429665
hsa-miR-19b-3p	ESR1	ER.alpha.R.V_GBL.9014870	0.912358	0.381242
hsa-miR-19b-3p	GSK3B	GSK3.alpha.beta.M.V_GBL.9014954	0.983821	0.318849
hsa-miR-19b-3p	KIT	c.Kit.R.V_GBL.9014850	0.834396	0.325851
hsa-miR-19b-3p	MAPK1	MAPK_pT202_Y204.R.V_GBL.9014888	0.821438	0.00268379
hsa-miR-19b-3p	MAPK14	p38_pT180_Y182.R.V_GBL.9014903	0.761255	0.0175662
hsa-miR-19b-3p	NOTCH1	Notch1.R.V_GBL.9014896	1.00172	0.487196
hsa-miR-19b-3p	PEA15	Pea.15.R.V_GBL.9014911	1.02811	0.38507
hsa-miR-19b-3p	PIK3CA	PI3K.p110.alpha.R.C_GBL.9014912	0.801087	0.0309361
hsa-miR-19b-3p	PRKAA1	AMPK.alpha.R.C_GBL.9014828	0.881107	0.171493
hsa-miR-19b-3p	PTEN	PTEN.R.V_GBL.9014918	0.87627	0.0685821
hsa-miR-19b-3p	RAF1	C.Raf.R.V_GBL.9014857	0.594111	0.00730482
hsa-miR-19b-3p	SMAD4	Smad4.M.V_GBL.9014964	1.00271	0.478051
hsa-miR-19b-3p	SRC	Src_pY527.R.V_GBL.9014926	0.743407	0.0904333
hsa-miR-19b-3p	YWHAE	X14.3.3_epsilon.M.C_GBL.9014939	0.973547	0.313594
hsa-miR-205-5p	ACACB	ACC_pS79.R.V_GBL.9014843	1.04455	0.292161
hsa-miR-205-5p	BCL2	Bcl.2.M.V_GBL.9014998	0.907582	0.272755
hsa-miR-205-5p	CDH3	P.Cadherin.R.C_GBL.9014909	0.852093	0.113133
hsa-miR-205-5p	EIF4E	eIF4E.R.V_GBL.9014868	1.02	0.415301
hsa-miR-205-5p	ERBB3	HER3.R.V_GBL.9014881	0.876863	0.0842664
hsa-miR-205-5p	ERRFI1	MIG.6.M.V_GBL.9014957	0.722087	0.00186325
hsa-miR-205-5p	FOXO3	FOXO3a.R.C_GBL.9014874	0.722956	0.0242729
hsa-miR-205-5p	GAB2	GAB2.R.V_GBL.9014875	0.70564	0.000581548
hsa-miR-205-5p	GATA3	GATA3.M.V_GBL.9014953	0.905009	0.034108
hsa-miR-205-5p	GSK3B	GSK3.alpha.beta.M.V_GBL.9014954	0.990373	0.388191
hsa-miR-205-5p	MAPK3	MAPK_pT202_Y204.R.V_GBL.9014888	1.09892	0.013746
hsa-miR-205-5p	MSH2	MSH2.M.C_GBL.9014958	0.983193	0.405142
hsa-miR-205-5p	NCOA3	AIB1.M.V_GBL.9014940	1.00163	0.485142
hsa-miR-205-5p	PTEN	PTEN.R.V_GBL.9014918	1.16605	0.0367156
hsa-miR-205-5p	SMAD1	Smad1.R.V_GBL.9014923	0.884774	0.115317
hsa-miR-205-5p	SMAD4	Smad4.M.V_GBL.9014964	0.973628	0.301094
hsa-miR-205-5p	VASP	VASP.R.C_GBL.9014877	1.12126	0.078477
hsa-miR-205-5p	YAP1	YAP_pS127.R.C_GBL.9014935	0.967853	0.330526
hsa-miR-206	CCND1	Cyclin.D1.R.V_GBL.9014859	0.84114	0.0750112
hsa-miR-206	CDH2	N.Cadherin.R.V_GBL.9014893	1.00853	0.426779
hsa-miR-206	EIF4E	eIF4E.R.V_GBL.9014868	0.977997	0.407066
hsa-miR-206	FN1	Fibronectin.R.C_GBL.9014872	0.899798	0.194699
hsa-miR-206	GSK3B	GSK3alpha.beta_pS21_S9.R.V_GBL.9014876	0.96368	0.273387
hsa-miR-206	KIT	c.Kit.R.V_GBL.9014850	0.990991	0.490012
hsa-miR-206	MAPK1	MAPK_pT202_Y204.R.V_GBL.9014888	0.735094	0.000851866
hsa-miR-206	MAPK3	MAPK_pT202_Y204.R.V_GBL.9014888	0.735094	0.000851866
hsa-miR-206	MET	c.Met_pY1235.R.C_GBL.9014852	0.748898	0.00101806
hsa-miR-206	NCOA3	AIB1.M.V_GBL.9014940	1.01636	0.355759
hsa-miR-206	NOTCH3	Notch3.R.C_GBL.9014897	0.779532	0.0695606
hsa-miR-206	PEA15	Pea.15.R.V_GBL.9014911	1.10629	0.156658
hsa-miR-206	PIK3R1	PI3K.p85.R.V_GBL.9014913	0.924271	0.0429503
hsa-miR-206	SMAD1	Smad1.R.V_GBL.9014923	0.891931	0.127115
hsa-miR-206	SMAD4	Smad4.M.V_GBL.9014964	0.995931	0.467126
hsa-miR-206	SNAI2	Snail.M.C_GBL.9014965	1.26648	0.150451
hsa-miR-206	VASP	VASP.R.C_GBL.9014877	0.901296	0.111879
hsa-miR-208b	ACACB	ACC_pS79.R.V_GBL.9014843	1.69973	0.00119955
hsa-miR-208b	BCL2L11	Bim.R.V_GBL.9014838	1.00266	0.47892
hsa-miR-208b	CDH2	N.Cadherin.R.V_GBL.9014893	0.959391	0.20461
hsa-miR-208b	CDKN1A	p21.R.C_GBL.9014898	0.929739	0.149859
hsa-miR-208b	GATA3	GATA3.M.V_GBL.9014953	0.934292	0.0744081
hsa-miR-208b	PTCH1	PTCH.R.C_GBL.9014917	1.09629	0.0334741
hsa-miR-208b	RB1	Rb_pS807_S811.R.V_GBL.9014920	0.914843	0.140844
hsa-miR-208b	SMAD4	Smad4.M.V_GBL.9014964	0.923418	0.095159
hsa-miR-208b	YBX1	YB.1_pS102.R.V_GBL.9014934	1.00268	0.491591
hsa-miR-20a-5p	AKT3	Akt_pS473.R.V_GBL.9014825	0.705929	0.0296254
hsa-miR-20a-5p	BCL2L11	Bim.R.V_GBL.9014838	1.09275	0.0696576
hsa-miR-20a-5p	BECN1	Beclin.G.V_GBL.9014969	0.8669	0.0855134
hsa-miR-20a-5p	BID	Bid.R.C_GBL.9014837	0.853221	0.0308175
hsa-miR-20a-5p	CASP7	Caspase.7_cleavedD198.R.C_GBL.9014840	0.806872	0.14411
hsa-miR-20a-5p	CAV1	Caveolin.1.R.V_GBL.9014842	0.854876	0.131019
hsa-miR-20a-5p	CCND1	Cyclin.D1.R.V_GBL.9014859	0.82674	0.0633682
hsa-miR-20a-5p	CDKN1A	p21.R.C_GBL.9014898	0.963747	0.28234
hsa-miR-20a-5p	CDKN1B	p27_pT157.R.C_GBL.9014899	0.998781	0.493016
hsa-miR-20a-5p	ERBB3	HER3_pY1298.R.C_GBL.9014880	0.901557	0.0521201
hsa-miR-20a-5p	ESR1	ER.alpha_pS118.R.V_GBL.9014869	0.890758	0.00349407
hsa-miR-20a-5p	MAPK1	MAPK_pT202_Y204.R.V_GBL.9014888	0.937817	0.0426272
hsa-miR-20a-5p	MYC	c.Myc.R.C_GBL.9014853	0.9494	0.0400798
hsa-miR-20a-5p	NCOA3	AIB1.M.V_GBL.9014940	1.03736	0.210818
hsa-miR-20a-5p	PIK3R1	PI3K.p85.R.V_GBL.9014913	1.07276	0.0468813
hsa-miR-20a-5p	PTEN	PTEN.R.V_GBL.9014918	1.21381	0.019969
hsa-miR-20a-5p	PTK2	FAK.R.C_GBL.9014871	0.996919	0.453954
hsa-miR-20a-5p	RB1	Rb.M.V_GBL.9014952	0.940998	0.230743
hsa-miR-20a-5p	RPS6KA1	p90RSK_pT359_S363.R.C_GBL.9014907	0.836986	0.0388913
hsa-miR-20a-5p	SMAD1	Smad1.R.V_GBL.9014923	0.850717	0.0736339
hsa-miR-20a-5p	SMAD4	Smad4.M.V_GBL.9014964	1.02262	0.326313
hsa-miR-20a-5p	SRC	Src_pY416.R.C_GBL.9014925	0.851482	0.049744
hsa-miR-20a-5p	STAT3	STAT3_pY705.R.V_GBL.9014927	1.09604	0.0973195
hsa-miR-20a-5p	VASP	VASP.R.C_GBL.9014877	1.03373	0.318755
hsa-miR-20a-5p	XIAP	XIAP.R.C_GBL.9014933	0.794635	0.0197316
hsa-miR-20a-5p	YAP1	YAP_pS127.R.C_GBL.9014935	1.01011	0.444257
hsa-miR-20b-5p	AKT3	Akt.R.V_GBL.9014827	0.919846	0.0882278
hsa-miR-20b-5p	BCL2L11	Bim.R.V_GBL.9014838	1.21526	0.00942105
hsa-miR-20b-5p	BECN1	Beclin.G.V_GBL.9014969	0.94452	0.25464
hsa-miR-20b-5p	BID	Bid.R.C_GBL.9014837	0.88519	0.0533777
hsa-miR-20b-5p	CASP7	Caspase.7_cleavedD198.R.C_GBL.9014840	0.893372	0.264216
hsa-miR-20b-5p	CAV1	Caveolin.1.R.V_GBL.9014842	1.10205	0.202041
hsa-miR-20b-5p	CCND1	Cyclin.D1.R.V_GBL.9014859	0.837478	0.0718265
hsa-miR-20b-5p	CDKN1A	p21.R.C_GBL.9014898	0.899135	0.0852299
hsa-miR-20b-5p	CDKN1B	p27_pT198.R.V_GBL.9014900	0.904972	0.267529
hsa-miR-20b-5p	ERBB3	HER3_pY1298.R.C_GBL.9014880	0.937857	0.120604
hsa-miR-20b-5p	ERRFI1	MIG.6.M.V_GBL.9014957	0.982662	0.321108
hsa-miR-20b-5p	ESR1	ER.alpha.R.V_GBL.9014870	0.874123	0.33353
hsa-miR-20b-5p	MAPK1	MAPK_pT202_Y204.R.V_GBL.9014888	0.974246	0.185658
hsa-miR-20b-5p	MAPK9	JNK2.R.C_GBL.9014886	0.921306	0.303391
hsa-miR-20b-5p	MYC	c.Myc.R.C_GBL.9014853	0.856567	0.00257327
hsa-miR-20b-5p	NCOA3	AIB1.M.V_GBL.9014940	0.991071	0.419324
hsa-miR-20b-5p	PARP1	PARP_cleaved.M.C_GBL.9014960	0.924012	0.0455805
hsa-miR-20b-5p	PIK3R1	PI3K.p85.R.V_GBL.9014913	0.909172	0.0282264
hsa-miR-20b-5p	PTEN	PTEN.R.V_GBL.9014918	1.24474	0.0141147
hsa-miR-20b-5p	PTK2	FAK.R.C_GBL.9014871	0.958933	0.0961998
hsa-miR-20b-5p	RB1	Rb_pS807_S811.R.V_GBL.9014920	0.82262	0.0360544
hsa-miR-20b-5p	RPS6KA1	p90RSK_pT359_S363.R.C_GBL.9014907	0.846914	0.0447364
hsa-miR-20b-5p	SMAD1	Smad1.R.V_GBL.9014923	0.86385	0.0872457
hsa-miR-20b-5p	SMAD4	Smad4.M.V_GBL.9014964	0.899093	0.0564178
hsa-miR-20b-5p	STAT3	STAT3_pY705.R.V_GBL.9014927	1.03417	0.297696
hsa-miR-20b-5p	VASP	VASP.R.C_GBL.9014877	0.975549	0.365047
hsa-miR-20b-5p	XIAP	XIAP.R.C_GBL.9014933	0.654426	0.00488252
hsa-miR-20b-5p	YAP1	YAP_pS127.R.C_GBL.9014935	0.984335	0.414239
hsa-miR-214-3p	AKT3	Akt_pS473.R.V_GBL.9014825	0.472719	0.00649239
hsa-miR-214-3p	BAX	Bax.R.V_GBL.9014833	1.18187	0.00274931
hsa-miR-214-3p	BCL2L11	Bim.R.V_GBL.9014838	1.28685	0.00425401
hsa-miR-214-3p	CTNNB1	beta.Catenin.R.V_GBL.9014836	1.01108	0.429236
hsa-miR-214-3p	ERRFI1	MIG.6.M.V_GBL.9014957	0.634825	0.000839175
hsa-miR-214-3p	ESR1	ER.alpha.R.V_GBL.9014870	0.546006	0.0925112
hsa-miR-214-3p	GSK3B	GSK3alpha.beta_pS21_S9.R.V_GBL.9014876	0.71335	0.00640189
hsa-miR-214-3p	IRS1	IRS1.R.V_GBL.9014885	1.02243	0.169543
hsa-miR-214-3p	MAPK1	MAPK_pT202_Y204.R.V_GBL.9014888	0.903437	0.0146424
hsa-miR-214-3p	MAPK3	MAPK_pT202_Y204.R.V_GBL.9014888	0.903437	0.0146424
hsa-miR-214-3p	PEA15	Pea.15.R.V_GBL.9014911	1.07636	0.224524
hsa-miR-214-3p	PTEN	PTEN.R.V_GBL.9014918	1.25932	0.0121189
hsa-miR-214-3p	SRC	Src_pY527.R.V_GBL.9014926	0.868273	0.219174
hsa-miR-214-3p	VASP	VASP.R.C_GBL.9014877	0.898587	0.107121
hsa-miR-214-3p	XIAP	XIAP.R.C_GBL.9014933	0.862388	0.0503488
hsa-miR-214-3p	YBX1	YB.1_pS102.R.V_GBL.9014934	1.03569	0.390401
hsa-miR-214-3p	YWHAE	X14.3.3_epsilon.M.C_GBL.9014939	0.977126	0.3364
hsa-miR-21-5p	AKT3	Akt_pS473.R.V_GBL.9014825	0.500496	0.00753701
hsa-miR-21-5p	BCL2	Bcl.2.M.V_GBL.9014998	1.16709	0.153391
hsa-miR-21-5p	MSH2	MSH2.M.C_GBL.9014958	0.928146	0.17213
hsa-miR-21-5p	PIK3R1	PI3K.p85.R.V_GBL.9014913	0.935773	0.0609057
hsa-miR-21-5p	STAT3	STAT3_pY705.R.V_GBL.9014927	1.00113	0.4928
hsa-miR-21-5p	VASP	VASP.R.C_GBL.9014877	1.07551	0.163321
hsa-miR-21-5p	YAP1	YAP_pS127.R.C_GBL.9014935	0.948651	0.247593
hsa-miR-217	AKT3	Akt_pS473.R.V_GBL.9014825	0.437036	0.00541121
hsa-miR-217	CDH1	E.Cadherin.R.V_GBL.9014862	1.0281	0.411758
hsa-miR-217	CTNNB1	beta.Catenin.R.V_GBL.9014836	0.959831	0.266215
hsa-miR-217	FN1	Fibronectin.R.C_GBL.9014872	0.90809	0.212529
hsa-miR-217	FOXO3	FOXO3a.R.C_GBL.9014874	0.672744	0.01595
hsa-miR-217	IGF1R	IGF.1R.beta.R.C_GBL.9014883	0.894782	0.00204813
hsa-miR-217	KIT	c.Kit.R.V_GBL.9014850	1.15297	0.337928
hsa-miR-217	MAPK1	MAPK_pT202_Y204.R.V_GBL.9014888	0.950025	0.0673384
hsa-miR-217	PEA15	Pea.15.R.V_GBL.9014911	1.11021	0.149426
hsa-miR-217	PRKAA1	AMPK.alpha.R.C_GBL.9014828	0.880168	0.169885
hsa-miR-217	PTEN	PTEN.R.V_GBL.9014918	1.12024	0.0724707
hsa-miR-217	RPS6KB1	p70S6K.R.V_GBL.9014906	0.855878	0.0613948
hsa-miR-217	SNAI2	Snail.M.C_GBL.9014965	1.31484	0.118554
hsa-miR-217	VASP	VASP.R.C_GBL.9014877	1.09726	0.114513
hsa-miR-218-5p	CDH2	N.Cadherin.R.V_GBL.9014893	0.95479	0.182439
hsa-miR-218-5p	GAB2	GAB2.R.V_GBL.9014875	0.628218	0.000291185
hsa-miR-218-5p	GSK3B	GSK3alpha.beta_pS21_S9.R.V_GBL.9014876	0.903917	0.0855434
hsa-miR-218-5p	INPP4B	INPP4B.G.C_GBL.9014970	0.94858	0.178095
hsa-miR-218-5p	KIT	c.Kit.R.V_GBL.9014850	0.869472	0.360032
hsa-miR-218-5p	MYC	c.Myc.R.C_GBL.9014853	0.815578	0.00124131
hsa-miR-218-5p	PIK3R1	PI3K.p85.R.V_GBL.9014913	0.976204	0.242853
hsa-miR-218-5p	PXN	Paxillin.R.V_GBL.9014908	1.01932	0.368404
hsa-miR-218-5p	RPS6KA1	p90RSK_pT359_S363.R.C_GBL.9014907	1.0454	0.257871
hsa-miR-218-5p	RPS6KB1	p70S6K.R.V_GBL.9014906	0.769458	0.021071
hsa-miR-218-5p	SNAI2	Snail.M.C_GBL.9014965	1.13987	0.279746
hsa-miR-218-5p	STMN1	Stathmin.R.V_GBL.9014929	1.11344	0.0443373
hsa-miR-219-1-3p	AKT3	Akt_pS473.R.V_GBL.9014825	0.650077	0.0193265
hsa-miR-219-1-3p	BECN1	Beclin.G.V_GBL.9014969	0.926683	0.198172
hsa-miR-219-1-3p	CCND1	Cyclin.D1.R.V_GBL.9014859	0.858744	0.092809
hsa-miR-219-1-3p	FN1	Fibronectin.R.C_GBL.9014872	0.818305	0.0831316
hsa-miR-219-1-3p	MAPK9	JNK2.R.C_GBL.9014886	0.98775	0.467274
hsa-miR-219-1-3p	NCOA3	AIB1.M.V_GBL.9014940	0.965686	0.228236
hsa-miR-219-1-3p	NOTCH3	Notch3.R.C_GBL.9014897	0.874966	0.169406
hsa-miR-219-1-3p	PTEN	PTEN.R.V_GBL.9014918	1.34346	0.00563452
hsa-miR-219-1-3p	RAF1	C.Raf_pS338.R.C_GBL.9014856	0.847499	0.202875
hsa-miR-219-1-3p	RPS6KA1	p90RSK_pT359_S363.R.C_GBL.9014907	0.829636	0.0351628
hsa-miR-219-1-3p	YWHAE	X14.3.3_epsilon.M.C_GBL.9014939	1.07867	0.103573
hsa-miR-219-5p	CASP3	Caspase.3_active.R.C_GBL.9014991	0.849117	0.117994
hsa-miR-219-5p	CDH3	P.Cadherin.R.C_GBL.9014909	0.904409	0.199429
hsa-miR-219-5p	ESR1	ER.alpha_pS118.R.V_GBL.9014869	0.976504	0.124544
hsa-miR-219-5p	FOXO3	FOXO3A_pS318_S321.R.C_GBL.9014873	0.887412	0.160319
hsa-miR-219-5p	GSK3B	GSK3.alpha.beta.M.V_GBL.9014954	0.831009	0.00605595
hsa-miR-219-5p	NFKB1	NF.kB.p65_pS536.R.C_GBL.9014895	0.812667	0.00987039
hsa-miR-219-5p	PTEN	PTEN.R.V_GBL.9014918	0.805087	0.0251225
hsa-miR-219-5p	SMAD4	Smad4.M.V_GBL.9014964	0.993256	0.445681
hsa-miR-219-5p	XIAP	XIAP.R.C_GBL.9014933	0.832163	0.0322642
hsa-miR-221-3p	BCL2L11	Bim.R.V_GBL.9014838	1.17823	0.0155379
hsa-miR-221-3p	CDH2	N.Cadherin.R.V_GBL.9014893	1.08077	0.0765786
hsa-miR-221-3p	CDKN1B	p27.R.V_GBL.9014937	0.775822	0.0552571
hsa-miR-221-3p	CTNNB1	beta.Catenin.R.V_GBL.9014836	0.635914	0.00390421
hsa-miR-221-3p	ERBB3	HER3.R.V_GBL.9014881	0.785482	0.0256801
hsa-miR-221-3p	ESR1	ER.alpha_pS118.R.V_GBL.9014869	0.961475	0.0506896
hsa-miR-221-3p	KDR	VEGFR2.R.V_GBL.9014932	1.07024	0.299307
hsa-miR-221-3p	KIT	c.Kit.R.V_GBL.9014850	1.08347	0.408721
hsa-miR-221-3p	MAPK14	p38_MAPK.R.C_GBL.9014902	1.03953	0.330263
hsa-miR-221-3p	NCOA3	AIB1.M.V_GBL.9014940	1.17924	0.0105307
hsa-miR-221-3p	PIK3R1	PI3K.p85.R.V_GBL.9014913	1.06666	0.0564417
hsa-miR-221-3p	PTK2	FAK.pY397_GBL.9014963	0.773387	0.0037569
hsa-miR-221-3p	RPS6KB1	p70S6K.R.V_GBL.9014906	0.968162	0.334897
hsa-miR-221-3p	SMAD4	Smad4.M.V_GBL.9014964	0.973079	0.297518
hsa-miR-221-3p	STMN1	Stathmin.R.V_GBL.9014929	0.982005	0.359765
hsa-miR-221-3p	YAP1	YAP_pS127.R.C_GBL.9014935	0.964657	0.315516
hsa-miR-222-3p	BCL2L11	Bim.R.V_GBL.9014838	1.33319	0.0027772
hsa-miR-222-3p	CDH2	N.Cadherin.R.V_GBL.9014893	0.903181	0.0534015
hsa-miR-222-3p	CDKN1B	p27.R.V_GBL.9014937	0.800731	0.0700028
hsa-miR-222-3p	CTNNB1	beta.Catenin.R.V_GBL.9014836	0.785433	0.0164696
hsa-miR-222-3p	ERBB3	HER3_pY1298.R.C_GBL.9014880	1.0979	0.052734
hsa-miR-222-3p	ESR1	ER.alpha.R.V_GBL.9014870	1.13352	0.324437
hsa-miR-222-3p	INPP4B	INPP4B.G.C_GBL.9014970	0.847756	0.0242675
hsa-miR-222-3p	KDR	VEGFR2.R.V_GBL.9014932	1.01328	0.459353
hsa-miR-222-3p	KIT	c.Kit.R.V_GBL.9014850	0.992775	0.491989
hsa-miR-222-3p	MAPK14	p38_MAPK.R.C_GBL.9014902	0.891784	0.137884
hsa-miR-222-3p	PIK3R1	PI3K.p85.R.V_GBL.9014913	1.00134	0.483536
hsa-miR-222-3p	PTK2	FAK.R.C_GBL.9014871	0.899178	0.0130096
hsa-miR-222-3p	RPS6KB1	p70S6K.R.V_GBL.9014906	0.955015	0.276679
hsa-miR-222-3p	STMN1	Stathmin.R.V_GBL.9014929	1.16309	0.0186929
hsa-miR-222-3p	WWTR1	TAZ_pS89.R.C_GBL.9014930	0.980192	0.395191
hsa-miR-222-3p	YWHAE	X14.3.3_epsilon.M.C_GBL.9014939	0.864619	0.035087
hsa-miR-22-3p	AKT3	Akt_pS473.R.V_GBL.9014825	0.400312	0.00453188
hsa-miR-22-3p	EEF2K	eEF2K.R.V_GBL.9014863	0.578781	0.000928984
hsa-miR-22-3p	ERBB3	HER3.R.V_GBL.9014881	0.764482	0.020383
hsa-miR-22-3p	ESR1	ER.alpha_pS118.R.V_GBL.9014869	0.97423	0.107868
hsa-miR-22-3p	MAPK14	p38_MAPK.R.C_GBL.9014902	0.791709	0.0416506
hsa-miR-22-3p	MAPT	Tau.M.C_GBL.9014968	1.35761	0.00368706
hsa-miR-22-3p	PTEN	PTEN.R.V_GBL.9014918	0.867138	0.0595087
hsa-miR-22-3p	SMAD1	Smad1.R.V_GBL.9014923	0.875535	0.101833
hsa-miR-22-3p	SMAD4	Smad4.M.V_GBL.9014964	1.01326	0.394664
hsa-miR-22-3p	VASP	VASP.R.C_GBL.9014877	1.02948	0.33948
hsa-miR-224-3p	BCL2	Bcl.2.M.V_GBL.9014998	1.18879	0.129594
hsa-miR-224-3p	CCND1	Cyclin.D1.R.V_GBL.9014859	0.896306	0.149018
hsa-miR-224-3p	DVL3	Dvl3.R.V_GBL.9014861	1.14786	0.114412
hsa-miR-224-3p	GAB2	GAB2.R.V_GBL.9014875	0.574714	0.000195212
hsa-miR-224-3p	IGF1R	IGF.1R.beta.R.C_GBL.9014883	1.57696	1.3103e-05
hsa-miR-224-3p	JUN	c.Jun_pS73.R.C_GBL.9014849	1.02106	0.356408
hsa-miR-224-3p	KIT	c.Kit.R.V_GBL.9014850	0.852692	0.343429
hsa-miR-224-3p	MAP2K1	MEK1.R.V_GBL.9014890	0.816517	0.00958212
hsa-miR-224-3p	MAPK9	JNK2.R.C_GBL.9014886	0.8734	0.212307
hsa-miR-224-3p	MRE11A	Mre11.R.C_GBL.9014891	0.999394	0.493448
hsa-miR-224-3p	NOTCH1	Notch1.R.V_GBL.9014896	0.854641	0.0300771
hsa-miR-224-3p	PDK1	PDK1_pS241.R.V_GBL.9014910	1.23896	0.0248694
hsa-miR-224-3p	RB1	Rb_pS807_S811.R.V_GBL.9014920	0.641609	0.00588416
hsa-miR-23b-3p	BCL2	Bcl.2.M.V_GBL.9014998	0.828165	0.147825
hsa-miR-23b-3p	BECN1	Beclin.G.V_GBL.9014969	0.971295	0.362457
hsa-miR-23b-3p	CASP7	Caspase.7_cleavedD198.R.C_GBL.9014840	0.809294	0.146594
hsa-miR-23b-3p	CCND1	Cyclin.D1.R.V_GBL.9014859	0.909396	0.176323
hsa-miR-23b-3p	ESR1	ER.alpha.R.V_GBL.9014870	0.926762	0.400053
hsa-miR-23b-3p	FOXO3	FOXO3a.R.C_GBL.9014874	0.847395	0.0870602
hsa-miR-23b-3p	GSK3B	GSK3.alpha.beta.M.V_GBL.9014954	1.11113	0.0185582
hsa-miR-23b-3p	MAP2K1	MEK1_pS217_S221.R.V_GBL.9014889	1.00926	0.252732
hsa-miR-23b-3p	MAPK14	p38_MAPK.R.C_GBL.9014902	0.883253	0.123492
hsa-miR-23b-3p	MET	c.Met.M.C_GBL.9014985	0.927107	0.0967065
hsa-miR-23b-3p	PTEN	PTEN.R.V_GBL.9014918	1.11156	0.0833431
hsa-miR-23b-3p	SNAI2	Snail.M.C_GBL.9014965	0.932896	0.387043
hsa-miR-23b-3p	STAT5A	STAT5.ALPHA.R.V_GBL.9014928	0.901799	0.00728493
hsa-miR-23b-3p	XIAP	XIAP.R.C_GBL.9014933	0.765539	0.0140354
hsa-miR-24-3p	ACACA	ACC1.R.C_GBL.9014824	0.807237	0.00613453
hsa-miR-24-3p	AKT3	Akt_pS473.R.V_GBL.9014825	0.546114	0.00978122
hsa-miR-24-3p	BCL2L11	Bim.R.V_GBL.9014838	1.12052	0.040221
hsa-miR-24-3p	CAV1	Caveolin.1.R.V_GBL.9014842	0.816184	0.0896451
hsa-miR-24-3p	CDKN1B	p27_pT157.R.C_GBL.9014899	0.797056	0.025359
hsa-miR-24-3p	DVL3	Dvl3.R.V_GBL.9014861	0.945143	0.30751
hsa-miR-24-3p	ERBB3	HER3.R.V_GBL.9014881	1.10651	0.108024
hsa-miR-24-3p	GAB2	GAB2.R.V_GBL.9014875	0.90353	0.0137823
hsa-miR-24-3p	GSK3A	GSK3.alpha.beta.M.V_GBL.9014954	1.02358	0.251001
hsa-miR-24-3p	GSK3B	GSK3.alpha.beta.M.V_GBL.9014954	1.02358	0.251001
hsa-miR-24-3p	MAPK14	p38_MAPK.R.C_GBL.9014902	0.979425	0.408393
hsa-miR-24-3p	MAPK3	MAPK_pT202_Y204.R.V_GBL.9014888	1.45276	0.000174073
hsa-miR-24-3p	MYC	c.Myc.R.C_GBL.9014853	0.898309	0.00679529
hsa-miR-24-3p	NF2	NF2.R.C_GBL.9014894	1.73493	0.000104637
hsa-miR-24-3p	NOTCH3	Notch3.R.C_GBL.9014897	0.861067	0.14818
hsa-miR-24-3p	PEA15	Pea.15.R.V_GBL.9014911	1.08319	0.206931
hsa-miR-24-3p	RPS6KB1	p70S6K.R.V_GBL.9014906	0.990331	0.447665
hsa-miR-24-3p	SNAI2	Snail.M.C_GBL.9014965	1.04988	0.415228
hsa-miR-24-3p	STMN1	Stathmin.R.V_GBL.9014929	1.09453	0.0649476
hsa-miR-24-3p	XIAP	XIAP.R.C_GBL.9014933	0.875637	0.0620981
hsa-miR-26a-1-3p	GSK3B	GSK3.alpha.beta.M.V_GBL.9014954	0.971092	0.209843
hsa-miR-26a-1-3p	IRS1	IRS1.R.V_GBL.9014885	0.901024	0.00767471
hsa-miR-26a-1-3p	NCOA3	AIB1.M.V_GBL.9014940	0.823461	0.0109669
hsa-miR-26a-1-3p	PTEN	PTEN.R.V_GBL.9014918	1.09088	0.117608
hsa-miR-26a-5p	BAK1	Bak.R.C_GBL.9014832	0.899497	0.0605275
hsa-miR-26a-5p	BID	Bid.R.C_GBL.9014837	0.932268	0.135466
hsa-miR-26a-5p	CCNE1	Cyclin_E1.M.V_GBL.9014986	0.931159	0.0598122
hsa-miR-26a-5p	CDH2	N.Cadherin.R.V_GBL.9014893	1.01824	0.348152
hsa-miR-26a-5p	CDKN1B	p27_pT157.R.C_GBL.9014899	0.815404	0.0318202
hsa-miR-26a-5p	CTNNB1	beta.Catenin.R.V_GBL.9014836	0.78586	0.0165543
hsa-miR-26a-5p	EIF4E	eIF4E.R.V_GBL.9014868	1.01961	0.416928
hsa-miR-26a-5p	ERRFI1	MIG.6.M.V_GBL.9014957	1.09475	0.0335518
hsa-miR-26a-5p	ESR1	ER.alpha.R.V_GBL.9014870	0.759332	0.215258
hsa-miR-26a-5p	GSK3B	GSK3.alpha.beta.M.V_GBL.9014954	0.943052	0.0816982
hsa-miR-26a-5p	MET	c.Met.M.C_GBL.9014985	0.984515	0.373084
hsa-miR-26a-5p	PECAM1	CD31.M.V_GBL.9014946	1.02822	0.207384
hsa-miR-26a-5p	PRKAA1	AMPK.alpha.R.C_GBL.9014828	0.829374	0.102626
hsa-miR-26a-5p	PTEN	PTEN.R.V_GBL.9014918	0.745189	0.0126953
hsa-miR-26a-5p	PTGS2	COX.2.R.C_GBL.9014979	0.893562	0.138391
hsa-miR-26a-5p	RB1	Rb_pS807_S811.R.V_GBL.9014920	0.908121	0.126316
hsa-miR-26a-5p	SMAD1	Smad1.R.V_GBL.9014923	0.800857	0.0404651
hsa-miR-26a-5p	SMAD4	Smad4.M.V_GBL.9014964	0.959751	0.220372
hsa-miR-26a-5p	STMN1	Stathmin.R.V_GBL.9014929	1.17781	0.014971
hsa-miR-26a-5p	YWHAE	X14.3.3_epsilon.M.C_GBL.9014939	1.11669	0.0488652
hsa-miR-29a-3p	ACACA	ACC1.R.C_GBL.9014824	0.963498	0.189811
hsa-miR-29a-3p	AKT3	Akt_pS473.R.V_GBL.9014825	0.438247	0.00544387
hsa-miR-29a-3p	BAK1	Bak.R.C_GBL.9014832	0.902026	0.0637103
hsa-miR-29a-3p	BIRC2	cIAP.R.V_GBL.9014848	0.756062	0.00290743
hsa-miR-29a-3p	CASP7	Caspase.7_cleavedD198.R.C_GBL.9014840	0.693161	0.0666547
hsa-miR-29a-3p	CCNE1	Cyclin_E1.M.V_GBL.9014986	1.04613	0.121819
hsa-miR-29a-3p	CDKN1A	p21.R.C_GBL.9014898	0.801434	0.0192573
hsa-miR-29a-3p	DVL3	Dvl3.R.V_GBL.9014861	0.790464	0.0611459
hsa-miR-29a-3p	ERRFI1	MIG.6.M.V_GBL.9014957	0.839944	0.00884001
hsa-miR-29a-3p	FOXO3	FOXO3a.R.C_GBL.9014874	0.840581	0.0804347
hsa-miR-29a-3p	GSK3B	GSK3.alpha.beta.M.V_GBL.9014954	0.960271	0.144953
hsa-miR-29a-3p	IRS1	IRS1.R.V_GBL.9014885	0.683232	0.000264545
hsa-miR-29a-3p	MRE11A	Mre11.R.C_GBL.9014891	0.926684	0.0600516
hsa-miR-29a-3p	NCOA3	AIB1.M.V_GBL.9014940	0.809183	0.00889325
hsa-miR-29a-3p	PIK3R1	PI3K.p85.R.V_GBL.9014913	0.859535	0.0092112
hsa-miR-29a-3p	PTEN	PTEN.R.V_GBL.9014918	0.880335	0.0731423
hsa-miR-29a-3p	PTK2	FAK.R.C_GBL.9014871	1.10317	0.0122404
hsa-miR-29a-3p	STAT3	STAT3_pY705.R.V_GBL.9014927	1.0441	0.250163
hsa-miR-29a-3p	WWTR1	TAZ_pS89.R.C_GBL.9014930	1.0113	0.439454
hsa-miR-29a-3p	YWHAE	X14.3.3_epsilon.M.C_GBL.9014939	0.943135	0.165139
hsa-miR-29b-2-5p	ACACA	ACC1.R.C_GBL.9014824	0.99431	0.441436
hsa-miR-29b-2-5p	AKT2	Akt_pS473.R.V_GBL.9014825	0.656224	0.0202098
hsa-miR-29b-2-5p	AKT3	Akt_pS473.R.V_GBL.9014825	0.656224	0.0202098
hsa-miR-29b-2-5p	CDH2	N.Cadherin.R.V_GBL.9014893	1.07291	0.0921445
hsa-miR-29b-2-5p	CTNNA1	alpha.Catenin.M.V_GBL.9014941	0.63857	0.279494
hsa-miR-29b-2-5p	CTNNB1	beta.Catenin.R.V_GBL.9014836	0.88592	0.0698027
hsa-miR-29b-2-5p	DVL3	Dvl3.R.V_GBL.9014861	0.996536	0.487022
hsa-miR-29b-2-5p	GSK3B	GSK3.alpha.beta.M.V_GBL.9014954	0.960864	0.14792
hsa-miR-29b-2-5p	MAPK1	MAPK_pT202_Y204.R.V_GBL.9014888	1.11598	0.00899078
hsa-miR-29b-2-5p	MET	c.Met.M.C_GBL.9014985	0.972487	0.286559
hsa-miR-29b-2-5p	NCOA3	AIB1.M.V_GBL.9014940	0.910125	0.0558175
hsa-miR-29b-2-5p	PECAM1	CD31.M.V_GBL.9014946	1.08741	0.0306317
hsa-miR-29b-2-5p	SMAD4	Smad4.M.V_GBL.9014964	0.951486	0.18186
hsa-miR-29b-2-5p	VASP	VASP.R.C_GBL.9014877	0.947939	0.239504
hsa-miR-29b-2-5p	XIAP	XIAP.R.C_GBL.9014933	0.823741	0.0287316
hsa-miR-29b-2-5p	YAP1	YAP_pS127.R.C_GBL.9014935	0.881229	0.0856156
hsa-miR-29b-2-5p	YWHAE	X14.3.3_epsilon.M.C_GBL.9014939	1.00392	0.470668
hsa-miR-29b-3p	ACACA	ACC1.R.C_GBL.9014824	1.05204	0.119524
hsa-miR-29b-3p	AKT3	Akt_pS473.R.V_GBL.9014825	0.469294	0.00637701
hsa-miR-29b-3p	BAK1	Bak.R.C_GBL.9014832	0.840452	0.0211017
hsa-miR-29b-3p	BIRC2	cIAP.R.V_GBL.9014848	0.809745	0.00586946
hsa-miR-29b-3p	CCNE1	Cyclin_E1.M.V_GBL.9014986	1.07881	0.0449348
hsa-miR-29b-3p	CDKN1A	p21.R.C_GBL.9014898	0.883861	0.0652899
hsa-miR-29b-3p	DVL3	Dvl3.R.V_GBL.9014861	0.828446	0.089305
hsa-miR-29b-3p	FOXO3	FOXO3a.R.C_GBL.9014874	0.941616	0.27297
hsa-miR-29b-3p	GSK3B	GSK3.alpha.beta.M.V_GBL.9014954	0.932152	0.058153
hsa-miR-29b-3p	IRS1	IRS1.R.V_GBL.9014885	0.718469	0.000375445
hsa-miR-29b-3p	MAPK14	p38_MAPK.R.C_GBL.9014902	0.912351	0.180236
hsa-miR-29b-3p	MET	c.Met.M.C_GBL.9014985	1.00873	0.427143
hsa-miR-29b-3p	MRE11A	Mre11.R.C_GBL.9014891	1.10089	0.029632
hsa-miR-29b-3p	NCOA3	AIB1.M.V_GBL.9014940	0.787949	0.00665989
hsa-miR-29b-3p	PIK3R1	PI3K.p85.R.V_GBL.9014913	0.975686	0.23855
hsa-miR-29b-3p	PTEN	PTEN.R.V_GBL.9014918	0.910732	0.120883
hsa-miR-29b-3p	STAT3	STAT3_pY705.R.V_GBL.9014927	0.95191	0.232888
hsa-miR-29b-3p	WWTR1	TAZ_pS89.R.C_GBL.9014930	0.948205	0.25139
hsa-miR-29b-3p	YWHAE	X14.3.3_epsilon.M.C_GBL.9014939	1.12324	0.0433865
hsa-miR-29c-3p	ACACA	ACC1.R.C_GBL.9014824	0.991284	0.410973
hsa-miR-29c-3p	AKT3	Akt_pS473.R.V_GBL.9014825	0.403409	0.00459846
hsa-miR-29c-3p	BAK1	Bak.R.C_GBL.9014832	0.821044	0.0157559
hsa-miR-29c-3p	CASP7	Caspase.7_cleavedD198.R.C_GBL.9014840	0.8672	0.220577
hsa-miR-29c-3p	CCNE1	Cyclin_E1.M.V_GBL.9014950	1.02256	0.335564
hsa-miR-29c-3p	DVL3	Dvl3.R.V_GBL.9014861	0.807394	0.0721724
hsa-miR-29c-3p	FOXO3	FOXO3a.R.C_GBL.9014874	0.794805	0.0485594
hsa-miR-29c-3p	GSK3B	GSK3.alpha.beta.M.V_GBL.9014954	0.931689	0.0573461
hsa-miR-29c-3p	IRS1	IRS1.R.V_GBL.9014885	0.69151	0.000286204
hsa-miR-29c-3p	MET	c.Met.M.C_GBL.9014985	0.998283	0.485541
hsa-miR-29c-3p	MRE11A	Mre11.R.C_GBL.9014891	1.07801	0.0528165
hsa-miR-29c-3p	NCOA3	AIB1.M.V_GBL.9014940	0.746076	0.00402129
hsa-miR-29c-3p	PIK3R1	PI3K.p85.R.V_GBL.9014913	0.960097	0.137831
hsa-miR-29c-3p	PTEN	PTEN.R.V_GBL.9014918	0.917707	0.136212
hsa-miR-29c-3p	PTK2	FAK.R.C_GBL.9014871	1.15408	0.00406404
hsa-miR-29c-3p	STAT3	STAT3_pY705.R.V_GBL.9014927	0.922635	0.136248
hsa-miR-29c-3p	WWTR1	TAZ_pS89.R.C_GBL.9014930	1.02701	0.359267
hsa-miR-29c-3p	YWHAE	X14.3.3_epsilon.M.C_GBL.9014939	1.03765	0.249337
hsa-miR-30d-5p	AKT3	Akt_pS473.R.V_GBL.9014825	0.883317	0.162052
hsa-miR-30d-5p	AR	AR.R.V_GBL.9014831	0.897306	0.0731308
hsa-miR-30d-5p	BCL2	Bcl.2.M.V_GBL.9014998	0.863647	0.194955
hsa-miR-30d-5p	BCL2L11	Bim.R.V_GBL.9014838	1.16445	0.0190952
hsa-miR-30d-5p	BECN1	Beclin.G.V_GBL.9014969	0.765088	0.025378
hsa-miR-30d-5p	CASP3	Caspase.3_active.R.C_GBL.9014991	0.978521	0.423428
hsa-miR-30d-5p	ERRFI1	MIG.6.M.V_GBL.9014957	0.978806	0.286904
hsa-miR-30d-5p	FOXO3	FOXO3A_pS318_S321.R.C_GBL.9014873	0.900048	0.184671
hsa-miR-30d-5p	IGF1R	IGF.1R.beta.R.C_GBL.9014883	0.936	0.00832725
hsa-miR-30d-5p	IRS1	IRS1.R.V_GBL.9014885	0.979588	0.188944
hsa-miR-30d-5p	MAPT	Tau.M.C_GBL.9014968	1.64055	0.000678606
hsa-miR-30d-5p	NCOA3	AIB1.M.V_GBL.9014940	1.02587	0.283039
hsa-miR-30d-5p	NOTCH1	Notch1.R.V_GBL.9014896	0.98398	0.383325
hsa-miR-30d-5p	PTEN	PTEN.R.V_GBL.9014918	1.20675	0.0217227
hsa-miR-30d-5p	RPS6KB1	p70S6K.R.V_GBL.9014906	0.87478	0.0805276
hsa-miR-30d-5p	SMAD1	Smad1.R.V_GBL.9014923	0.822156	0.0517865
hsa-miR-30d-5p	SNAI2	Snail.M.C_GBL.9014965	1.036	0.438476
hsa-miR-30d-5p	WWTR1	TAZ_pS89.R.C_GBL.9014930	0.706555	0.0115486
hsa-miR-30d-5p	YBX1	YB.1_pS102.R.V_GBL.9014934	0.992983	0.478027
hsa-miR-323b-5p	BCL2L11	Bim.R.V_GBL.9014838	1.37325	0.00200249
hsa-miR-323b-5p	FN1	Fibronectin.R.C_GBL.9014872	0.726607	0.0356982
hsa-miR-323b-5p	GSK3B	GSK3.alpha.beta.M.V_GBL.9014954	0.747935	0.00194232
hsa-miR-323b-5p	NF2	NF2.R.C_GBL.9014894	1.09097	0.0366803
hsa-miR-323b-5p	PIK3R1	PI3K.p85.R.V_GBL.9014913	0.984211	0.317597
hsa-miR-323b-5p	PRKCA	PKC.alpha_pS657.R.V_GBL.9014914	0.627435	0.000525273
hsa-miR-323b-5p	PTCH1	PTCH.R.C_GBL.9014917	1.01568	0.338857
hsa-miR-323b-5p	PTEN	PTEN.R.V_GBL.9014918	1.08617	0.127449
hsa-miR-323b-5p	STMN1	Stathmin.R.V_GBL.9014929	1.51007	0.000765954
hsa-miR-32-3p	BAX	Bax.R.V_GBL.9014833	1.03984	0.106163
hsa-miR-32-3p	BECN1	Beclin.G.V_GBL.9014969	1.02826	0.364477
hsa-miR-32-3p	CDK1	CDK1.R.V_GBL.9014947	0.951726	0.169167
hsa-miR-32-3p	CTNNA1	alpha.Catenin.M.V_GBL.9014941	0.689342	0.306286
hsa-miR-32-3p	GSK3A	GSK3alpha.beta_pS21_S9.R.V_GBL.9014876	0.842119	0.0301535
hsa-miR-32-3p	IGF1R	IGF.1R.beta.R.C_GBL.9014883	1.09482	0.00276364
hsa-miR-32-3p	IRS1	IRS1.R.V_GBL.9014885	0.995559	0.418368
hsa-miR-32-3p	MAPK9	JNK2.R.C_GBL.9014886	0.835447	0.158442
hsa-miR-32-3p	PIK3R1	PI3K.p85.R.V_GBL.9014913	1.22049	0.00260455
hsa-miR-32-3p	PTCH1	PTCH.R.C_GBL.9014917	0.913795	0.0430406
hsa-miR-32-3p	PTK2	FAK.R.C_GBL.9014871	0.998417	0.476278
hsa-miR-32-3p	RAF1	C.Raf_pS338.R.C_GBL.9014856	0.769874	0.120692
hsa-miR-32-3p	RB1	Rb_pS807_S811.R.V_GBL.9014920	0.852716	0.054237
hsa-miR-32-3p	SMAD4	Smad4.M.V_GBL.9014964	1.08657	0.0763402
hsa-miR-32-3p	YWHAE	X14.3.3_epsilon.M.C_GBL.9014939	0.876704	0.0433434
hsa-miR-330-5p	AKT3	Akt_pT308.R.V_GBL.9014971	0.863658	0.382584
hsa-miR-330-5p	BCL2	Bcl.2.M.V_GBL.9014998	0.809364	0.127761
hsa-miR-330-5p	BCL2L1	Bcl.xL.R.V_GBL.9014834	0.83271	0.0667587
hsa-miR-330-5p	CDH3	P.Cadherin.R.C_GBL.9014909	1.0888	0.214613
hsa-miR-330-5p	CTNNB1	beta.Catenin.R.V_GBL.9014836	0.914656	0.115933
hsa-miR-330-5p	GSK3A	GSK3alpha.beta_pS21_S9.R.V_GBL.9014876	0.996017	0.472731
hsa-miR-330-5p	IGF1R	IGF.1R.beta.R.C_GBL.9014883	1.16601	0.000538816
hsa-miR-330-5p	MAPK1	MAPK_pT202_Y204.R.V_GBL.9014888	0.901171	0.0137809
hsa-miR-330-5p	MAPK14	p38_pT180_Y182.R.V_GBL.9014903	0.696878	0.00936323
hsa-miR-330-5p	NF2	NF2.R.C_GBL.9014894	0.980279	0.299276
hsa-miR-330-5p	PTGS2	COX.2.R.C_GBL.9014979	0.871888	0.10439
hsa-miR-330-5p	RPS6KA1	p90RSK_pT359_S363.R.C_GBL.9014907	0.823416	0.0323493
hsa-miR-330-5p	SMAD3	Smad3.R.V_GBL.9014924	0.672631	0.00629108
hsa-miR-330-5p	STMN1	Stathmin.R.V_GBL.9014929	0.831675	0.0172466
hsa-miR-335-5p	CASP7	Caspase.7_cleavedD198.R.C_GBL.9014840	0.938643	0.354968
hsa-miR-335-5p	EEF2K	eEF2K.R.V_GBL.9014863	0.782527	0.00619944
hsa-miR-335-5p	ERBB3	HER3.R.V_GBL.9014881	0.92075	0.164493
hsa-miR-335-5p	ESR1	ER.alpha.R.V_GBL.9014870	0.548788	0.0935028
hsa-miR-335-5p	IRS1	IRS1.R.V_GBL.9014885	0.925337	0.01627
hsa-miR-335-5p	MET	c.Met_pY1235.R.C_GBL.9014852	0.827456	0.00302246
hsa-miR-335-5p	NCOA3	AIB1.M.V_GBL.9014940	0.946286	0.137094
hsa-miR-335-5p	PGR	PR.R.V_GBL.9014916	1.07048	0.429788
hsa-miR-335-5p	RB1	Rb_pS807_S811.R.V_GBL.9014920	0.822466	0.0359828
hsa-miR-33b-3p	ACACA	ACC1.R.C_GBL.9014824	0.713548	0.00198996
hsa-miR-33b-3p	CASP7	Caspase.7_cleavedD198.R.C_GBL.9014840	0.689792	0.0652337
hsa-miR-33b-3p	CDH2	N.Cadherin.R.V_GBL.9014893	1.02598	0.291845
hsa-miR-33b-3p	CDKN1B	p27.R.V_GBL.9014980	0.863364	0.0989702
hsa-miR-33b-3p	GSK3B	GSK3alpha.beta_pS21_S9.R.V_GBL.9014876	0.91647	0.108595
hsa-miR-33b-3p	KIT	c.Kit.R.V_GBL.9014850	1.02804	0.468957
hsa-miR-33b-3p	NCOA3	AIB1.M.V_GBL.9014940	1.152	0.0162498
hsa-miR-33b-3p	STAT5A	STAT5.ALPHA.R.V_GBL.9014928	0.76254	0.000573934
hsa-miR-33b-3p	YAP1	YAP_pS127.R.C_GBL.9014935	1.06584	0.197001
hsa-miR-34a-5p	AKT3	Akt_pT308.R.V_GBL.9014971	0.734713	0.284926
hsa-miR-34a-5p	BCL2	Bcl.2.M.V_GBL.9014998	0.636326	0.0377095
hsa-miR-34a-5p	CCND1	Cyclin.D1.R.V_GBL.9014859	0.877656	0.11749
hsa-miR-34a-5p	CDKN1B	p27_pT198.R.V_GBL.9014900	0.892533	0.243581
hsa-miR-34a-5p	ERRFI1	MIG.6.M.V_GBL.9014987	1.01032	0.441271
hsa-miR-34a-5p	FOXO3	FOXO3a.R.C_GBL.9014874	0.860853	0.102068
hsa-miR-34a-5p	GATA3	GATA3.M.V_GBL.9014953	0.925936	0.0587781
hsa-miR-34a-5p	IGF1R	IGF.1R.beta.R.C_GBL.9014883	1.03859	0.0305162
hsa-miR-34a-5p	MAP2K1	MEK1.R.V_GBL.9014890	0.657307	0.00164381
hsa-miR-34a-5p	MAPT	Tau.M.C_GBL.9014968	1.69586	0.000531404
hsa-miR-34a-5p	MET	c.Met_pY1235.R.C_GBL.9014852	0.705495	0.000636931
hsa-miR-34a-5p	NOTCH1	Notch1.R.V_GBL.9014896	2.03529	0.00011824
hsa-miR-34a-5p	PEA15	Pea.15.R.V_GBL.9014911	0.952573	0.313539
hsa-miR-34a-5p	PIK3R1	PI3K.p85.R.V_GBL.9014913	1.01136	0.365135
hsa-miR-34a-5p	PTEN	PTEN.R.V_GBL.9014918	1.17956	0.0306034
hsa-miR-34a-5p	SMAD4	Smad4.M.V_GBL.9014964	0.937121	0.130092
hsa-miR-34a-5p	STMN1	Stathmin.R.V_GBL.9014929	0.88135	0.0401284
hsa-miR-34b-3p	CCND1	Cyclin.D1.R.V_GBL.9014859	0.921627	0.206256
hsa-miR-34b-3p	CTNNA1	alpha.Catenin.M.V_GBL.9014941	0.731856	0.330053
hsa-miR-34b-3p	CTNNB1	beta.Catenin.R.V_GBL.9014836	1.10458	0.0822058
hsa-miR-34b-3p	EIF4E	eIF4E.R.V_GBL.9014868	0.946194	0.287484
hsa-miR-34b-3p	ESR1	ER.alpha.R.V_GBL.9014870	0.928037	0.401737
hsa-miR-34b-3p	FN1	Fibronectin.R.C_GBL.9014872	1.25715	0.0410212
hsa-miR-34b-3p	FOXO3	FOXO3a.R.C_GBL.9014874	0.88573	0.138008
hsa-miR-34b-3p	GSK3B	GSK3alpha.beta_pS21_S9.R.V_GBL.9014876	0.980062	0.367373
hsa-miR-34b-3p	MET	c.Met.M.C_GBL.9014985	0.886843	0.040424
hsa-miR-34b-3p	PDK1	PDK1_pS241.R.V_GBL.9014910	0.944392	0.255901
hsa-miR-34b-3p	PXN	Paxillin.R.V_GBL.9014908	1.07898	0.114382
hsa-miR-34b-3p	RB1	Rb.M.V_GBL.9014952	0.843393	0.0557082
hsa-miR-34b-3p	RPS6KB1	p70S6K.R.V_GBL.9014906	0.993103	0.462588
hsa-miR-34b-3p	SMAD3	Smad3.R.V_GBL.9014924	0.952671	0.246723
hsa-miR-34b-3p	VASP	VASP.R.C_GBL.9014877	1.0347	0.314094
hsa-miR-34b-5p	AKT3	Akt_pS473.R.V_GBL.9014825	0.462195	0.00614623
hsa-miR-34b-5p	CAV1	Caveolin.1.R.V_GBL.9014842	0.381308	0.00492117
hsa-miR-34b-5p	CDKN1B	p27.R.V_GBL.9014937	0.798143	0.0682692
hsa-miR-34b-5p	CTNNB1	beta.Catenin.R.V_GBL.9014836	0.824388	0.0271619
hsa-miR-34b-5p	ESR1	ER.alpha_pS118.R.V_GBL.9014869	0.915538	0.00718586
hsa-miR-34b-5p	FOXO3	FOXO3A_pS318_S321.R.C_GBL.9014873	0.957822	0.343333
hsa-miR-34b-5p	GATA3	GATA3.M.V_GBL.9014953	1.12457	0.0175809
hsa-miR-34b-5p	GSK3B	GSK3alpha.beta_pS21_S9.R.V_GBL.9014876	0.758637	0.0102395
hsa-miR-34b-5p	IGF1R	IGF.1R.beta.R.C_GBL.9014883	0.755678	0.000171078
hsa-miR-34b-5p	MAP2K1	MEK1.R.V_GBL.9014890	0.927318	0.0825506
hsa-miR-34b-5p	MAPK1	MAPK_pT202_Y204.R.V_GBL.9014888	1.1529	0.00417621
hsa-miR-34b-5p	MAPT	Tau.M.C_GBL.9014968	2.40002	6.6353e-05
hsa-miR-34b-5p	MET	c.Met_pY1235.R.C_GBL.9014852	0.713859	0.000693406
hsa-miR-34b-5p	MYC	c.Myc.R.C_GBL.9014853	0.65681	0.000198073
hsa-miR-34b-5p	NOTCH1	Notch1.R.V_GBL.9014896	0.736346	0.00640045
hsa-miR-34b-5p	PEA15	Pea.15.R.V_GBL.9014911	1.09794	0.173279
hsa-miR-34b-5p	PIK3R1	PI3K.p85.R.V_GBL.9014913	1.09177	0.0275332
hsa-miR-34b-5p	RAD50	Rad50.M.C_GBL.9014944	1.03438	0.0148452
hsa-miR-34b-5p	RPS6KB1	p70S6K_pT389.R.V_GBL.9014905	0.892261	0.00422775
hsa-miR-34b-5p	STAT3	STAT3_pY705.R.V_GBL.9014927	1.26039	0.0101691
hsa-miR-34b-5p	XIAP	XIAP.R.C_GBL.9014933	0.758136	0.012935
hsa-miR-34c-5p	AKT3	Akt_pT308.R.V_GBL.9014971	0.968674	0.472421
hsa-miR-34c-5p	BCL2	Bcl.2.M.V_GBL.9014998	0.768557	0.0936665
hsa-miR-34c-5p	CCND1	Cyclin.D1.R.V_GBL.9014859	0.998487	0.493264
hsa-miR-34c-5p	CDKN1B	p27_pT157.R.C_GBL.9014899	0.909433	0.126409
hsa-miR-34c-5p	ERCC1	ERCC1.M.C_GBL.9014951	0.980745	0.388986
hsa-miR-34c-5p	ERRFI1	MIG.6.M.V_GBL.9014987	1.01607	0.409281
hsa-miR-34c-5p	FOXO3	FOXO3a.R.C_GBL.9014874	0.951084	0.304669
hsa-miR-34c-5p	GATA3	GATA3.M.V_GBL.9014953	0.899073	0.0295786
hsa-miR-34c-5p	IGF1R	IGF.1R.beta.R.C_GBL.9014883	0.949805	0.0158931
hsa-miR-34c-5p	KIT	c.Kit.R.V_GBL.9014850	1.11634	0.374402
hsa-miR-34c-5p	MAP2K1	MEK1.R.V_GBL.9014890	0.595053	0.00100963
hsa-miR-34c-5p	MAPT	Tau.M.C_GBL.9014968	1.73447	0.000452948
hsa-miR-34c-5p	MET	c.Met_pY1235.R.C_GBL.9014852	0.757835	0.00113209
hsa-miR-34c-5p	MYC	c.Myc.R.C_GBL.9014853	0.617757	0.000143673
hsa-miR-34c-5p	NOTCH1	Notch1.R.V_GBL.9014896	0.722825	0.00556941
hsa-miR-34c-5p	PEA15	Pea.15.R.V_GBL.9014911	0.920102	0.215255
hsa-miR-34c-5p	SMAD4	Smad4.M.V_GBL.9014964	0.95054	0.177885
hsa-miR-34c-5p	STMN1	Stathmin.R.V_GBL.9014929	0.780703	0.00856192
hsa-miR-365a-3p	AKT3	Akt.R.V_GBL.9014827	0.767593	0.00726518
hsa-miR-365a-3p	BAX	Bax.R.V_GBL.9014833	0.741751	0.000992963
hsa-miR-365a-3p	BCL2	Bcl.2.M.V_GBL.9014998	1.00937	0.474693
hsa-miR-365a-3p	CCND1	Cyclin.D1.R.V_GBL.9014859	0.838776	0.0729372
hsa-miR-365a-3p	CDKN1A	p21.R.C_GBL.9014898	0.70343	0.00662742
hsa-miR-365a-3p	KIT	c.Kit.R.V_GBL.9014850	1.38973	0.162255
hsa-miR-365a-3p	MAPK1	MAPK_pT202_Y204.R.V_GBL.9014888	0.81953	0.00260308
hsa-miR-365a-3p	PTEN	PTEN.R.V_GBL.9014918	1.09105	0.117282
hsa-miR-367-5p	CASP7	Caspase.7_cleavedD198.R.C_GBL.9014840	0.91721	0.309713
hsa-miR-367-5p	CDK1	CDK1.R.V_GBL.9014844	0.913186	0.265572
hsa-miR-367-5p	IGF1R	IGF.1R.beta.R.C_GBL.9014883	0.828133	0.000486319
hsa-miR-367-5p	KIT	c.Kit.R.V_GBL.9014850	1.02975	0.467068
hsa-miR-367-5p	MET	c.Met_pY1235.R.C_GBL.9014852	0.837508	0.0035868
hsa-miR-367-5p	PIK3CA	PI3K.p110.alpha.R.C_GBL.9014912	1.07453	0.177478
hsa-miR-367-5p	PIK3R1	PI3K.p85.R.V_GBL.9014913	1.08406	0.0338863
hsa-miR-367-5p	PTEN	PTEN.R.V_GBL.9014918	0.974367	0.352135
hsa-miR-372	BCL2L11	Bim.R.V_GBL.9014838	1.15618	0.0217378
hsa-miR-372	CCND1	Cyclin.D1.R.V_GBL.9014859	0.865173	0.10048
hsa-miR-372	ESR1	ER.alpha.R.V_GBL.9014870	0.864413	0.322003
hsa-miR-372	FOXO3	FOXO3a.R.C_GBL.9014874	0.889379	0.144336
hsa-miR-372	GAB2	GAB2.R.V_GBL.9014875	1.06656	0.0345928
hsa-miR-372	GSK3B	GSK3.alpha.beta.M.V_GBL.9014954	1.07628	0.0453685
hsa-miR-372	IGF1R	IGF.1R.beta.R.C_GBL.9014883	0.940681	0.010229
hsa-miR-372	NCOA3	AIB1.M.V_GBL.9014940	1.33472	0.00182067
hsa-miR-372	PARP1	PARP_cleaved.M.C_GBL.9014960	0.970958	0.208545
hsa-miR-372	PECAM1	CD31.M.V_GBL.9014946	0.977011	0.248891
hsa-miR-372	PIK3CA	PI3K.p110.alpha.R.C_GBL.9014912	0.79372	0.0283721
hsa-miR-372	PTEN	PTEN.R.V_GBL.9014918	0.869185	0.0614117
hsa-miR-372	PTK2	FAK.R.C_GBL.9014871	0.933331	0.0362663
hsa-miR-372	RPS6KA1	p90RSK_pT359_S363.R.C_GBL.9014907	1.03019	0.329293
hsa-miR-373-3p	BCL2L11	Bim.R.V_GBL.9014838	1.49201	0.00089442
hsa-miR-373-3p	CCND1	Cyclin.D1.R.V_GBL.9014859	0.73405	0.0242684
hsa-miR-373-3p	EEF2K	eEF2K.R.V_GBL.9014863	0.882684	0.030817
hsa-miR-373-3p	ESR1	ER.alpha.R.V_GBL.9014870	0.917885	0.388411
hsa-miR-373-3p	FOXO3	FOXO3A_pS318_S321.R.C_GBL.9014873	0.824913	0.0810346
hsa-miR-373-3p	GAB2	GAB2.R.V_GBL.9014875	0.895412	0.0111291
hsa-miR-373-3p	IGF1R	IGF.1R.beta.R.C_GBL.9014883	0.919971	0.00447755
hsa-miR-373-3p	MAP2K1	MEK1.R.V_GBL.9014890	1.11903	0.0290016
hsa-miR-373-3p	NCOA3	AIB1.M.V_GBL.9014940	1.3283	0.00192575
hsa-miR-373-3p	PARP1	PARP_cleaved.M.C_GBL.9014960	1.23181	0.00246161
hsa-miR-373-3p	PECAM1	CD31.M.V_GBL.9014946	0.973713	0.221925
hsa-miR-373-3p	PIK3CA	PI3K.p110.alpha.R.C_GBL.9014912	0.744694	0.0166932
hsa-miR-373-3p	PTEN	PTEN.R.V_GBL.9014918	0.900702	0.102042
hsa-miR-373-3p	PTK2	FAK.R.C_GBL.9014871	0.878547	0.00788671
hsa-miR-373-3p	RB1	Rb_pS807_S811.R.V_GBL.9014920	0.956326	0.274993
hsa-miR-373-3p	RPS6KA1	p90RSK_pT359_S363.R.C_GBL.9014907	0.991	0.446718
hsa-miR-374a-3p	CCND1	Cyclin.D1.R.V_GBL.9014859	0.849371	0.08279
hsa-miR-374a-3p	CDH1	E.Cadherin.R.V_GBL.9014862	1.49034	0.0119753
hsa-miR-374a-3p	IGF1R	IGF.1R.beta.R.C_GBL.9014883	1.01263	0.204207
hsa-miR-374a-3p	MAPK9	JNK2.R.C_GBL.9014886	0.995002	0.486628
hsa-miR-374a-3p	MET	c.Met.M.C_GBL.9014985	0.940588	0.133287
hsa-miR-374a-3p	MSH6	MSH6.R.C_GBL.9014892	0.965479	0.20288
hsa-miR-374a-3p	PIK3R1	PI3K.p85.R.V_GBL.9014913	0.88071	0.0142328
hsa-miR-374a-3p	PRKAA1	AMPK.alpha.R.C_GBL.9014828	0.994559	0.481111
hsa-miR-374a-3p	TP53	p53.R.V_GBL.9014904	1.04825	0.441008
hsa-miR-374a-3p	TP53BP1	X53BP1.R.C_GBL.9014822	0.982532	0.403575
hsa-miR-374a-3p	VASP	VASP.R.C_GBL.9014877	1.02465	0.364013
hsa-miR-421	ACACA	ACC1.R.C_GBL.9014824	0.684542	0.00150393
hsa-miR-421	AKT3	Akt_pS473.R.V_GBL.9014825	0.423633	0.0050663
hsa-miR-421	FOXO3	FOXO3A_pS318_S321.R.C_GBL.9014873	0.944315	0.299197
hsa-miR-421	GATA3	GATA3.M.V_GBL.9014953	1.01477	0.346691
hsa-miR-421	IGF1R	IGF.1R.beta.R.C_GBL.9014883	1.01953	0.117416
hsa-miR-421	IRS1	IRS1.R.V_GBL.9014885	0.868266	0.00344772
hsa-miR-421	MAPK14	p38_pT180_Y182.R.V_GBL.9014903	0.791026	0.0245226
hsa-miR-421	NOTCH3	Notch3.R.C_GBL.9014897	0.833957	0.114405
hsa-miR-421	PECAM1	CD31.M.V_GBL.9014946	1.06957	0.051176
hsa-miR-421	PTEN	PTEN.R.V_GBL.9014918	1.09388	0.111777
hsa-miR-421	RPS6KB1	p70S6K.R.V_GBL.9014906	0.545226	0.00335294
hsa-miR-421	SMAD1	Smad1.R.V_GBL.9014923	0.941182	0.249824
hsa-miR-421	SMAD4	Smad4.M.V_GBL.9014964	1.01616	0.372785
hsa-miR-421	SNAI2	Snail.M.C_GBL.9014965	1.46324	0.0593594
hsa-miR-421	STMN1	Stathmin.R.V_GBL.9014929	1.18502	0.013494
hsa-miR-421	TP53BP1	X53BP1.R.C_GBL.9014822	0.766781	0.0189434
hsa-miR-421	YAP1	YAP_pS127.R.C_GBL.9014935	0.987306	0.430212
hsa-miR-423-5p	ACACA	ACC1.R.C_GBL.9014824	0.710586	0.00193157
hsa-miR-423-5p	CDH2	N.Cadherin.R.V_GBL.9014893	1.07979	0.0783343
hsa-miR-423-5p	DVL3	Dvl3.R.V_GBL.9014861	0.674425	0.0225406
hsa-miR-423-5p	EGFR	EGFR.R.C_GBL.9014867	1.06767	0.216351
hsa-miR-423-5p	EIF4EBP1	X4EBP1_pT37.R.V_GBL.9014820	0.760269	0.00745374
hsa-miR-423-5p	GSK3B	GSK3.alpha.beta.M.V_GBL.9014954	0.873812	0.0133619
hsa-miR-423-5p	MAP2K1	MEK1_pS217_S221.R.V_GBL.9014889	1.0255	0.0647503
hsa-miR-423-5p	MAPK3	MAPK_pT202_Y204.R.V_GBL.9014888	1.03636	0.117627
hsa-miR-423-5p	NF2	NF2.R.C_GBL.9014894	0.993808	0.43278
hsa-miR-423-5p	PEA15	Pea.15.R.V_GBL.9014911	1.05278	0.295328
hsa-miR-423-5p	PTCH1	PTCH.R.C_GBL.9014917	1.26368	0.00226615
hsa-miR-423-5p	STAT5A	STAT5.ALPHA.R.V_GBL.9014928	0.960878	0.0675308
hsa-miR-423-5p	STMN1	Stathmin.R.V_GBL.9014929	0.918789	0.0864919
hsa-miR-423-5p	VASP	VASP.R.C_GBL.9014877	1.06964	0.179864
hsa-miR-429	ACACA	ACC1.R.C_GBL.9014824	1.00249	0.474204
hsa-miR-429	AKT2	Akt_pT308.R.V_GBL.9014971	0.775883	0.314122
hsa-miR-429	CDKN1B	p27.R.V_GBL.9014980	0.845883	0.0800198
hsa-miR-429	ERRFI1	MIG.6.M.V_GBL.9014987	0.836991	0.0424304
hsa-miR-429	FN1	Fibronectin.R.C_GBL.9014872	0.635403	0.0177117
hsa-miR-429	IRS1	IRS1.R.V_GBL.9014885	0.944951	0.0343867
hsa-miR-429	JUN	c.Jun_pS73.R.C_GBL.9014849	1.02804	0.3137
hsa-miR-429	KDR	VEGFR2.R.V_GBL.9014932	1.25949	0.0593696
hsa-miR-429	MAPK9	JNK2.R.C_GBL.9014886	0.764428	0.0924032
hsa-miR-429	MRE11A	Mre11.R.C_GBL.9014891	1.03052	0.217848
hsa-miR-429	NCOA3	AIB1.M.V_GBL.9014940	0.906257	0.0510927
hsa-miR-429	NOTCH1	Notch1.R.V_GBL.9014896	0.929247	0.123441
hsa-miR-429	PRKCA	PKC.alpha.M.V_GBL.9014962	0.828318	0.0221614
hsa-miR-429	PTCH1	PTCH.R.C_GBL.9014917	1.09387	0.0355023
hsa-miR-429	PTEN	PTEN.R.V_GBL.9014918	1.17842	0.0310668
hsa-miR-429	RPS6KB1	p70S6K.R.V_GBL.9014906	0.813954	0.0353098
hsa-miR-429	SMAD4	Smad4.M.V_GBL.9014964	0.962516	0.234829
hsa-miR-429	SNAI2	Snail.M.C_GBL.9014965	1.38301	0.0855034
hsa-miR-429	XIAP	XIAP.R.C_GBL.9014933	0.851033	0.042367
hsa-miR-429	YAP1	YAP_pS127.R.C_GBL.9014935	1.0424	0.284052
hsa-miR-432-3p	ESR1	ER.alpha.R.V_GBL.9014870	0.782063	0.235453
hsa-miR-432-3p	KIT	c.Kit.R.V_GBL.9014850	0.483628	0.108581
hsa-miR-432-3p	NF2	NF2.R.C_GBL.9014894	0.93436	0.0729058
hsa-miR-432-3p	PTK2	FAK.R.C_GBL.9014871	0.754095	0.00105381
hsa-miR-432-3p	PXN	Paxillin.R.V_GBL.9014908	0.507028	0.00127135
hsa-miR-432-3p	SMAD4	Smad4.M.V_GBL.9014964	0.944311	0.153785
hsa-miR-432-3p	VASP	VASP.R.C_GBL.9014877	1.21943	0.0212465
hsa-miR-432-3p	YBX1	YB.1_pS102.R.V_GBL.9014934	0.716083	0.0470489
hsa-miR-454-3p	AR	AR.R.V_GBL.9014831	0.897326	0.0731575
hsa-miR-454-3p	BCL2L11	Bim.R.V_GBL.9014838	1.13079	0.0333577
hsa-miR-454-3p	CDKN1A	p21.R.C_GBL.9014898	1.06891	0.153742
hsa-miR-454-3p	CDKN1B	p27_pT157.R.C_GBL.9014899	0.995771	0.475789
hsa-miR-454-3p	ERBB3	HER3.R.V_GBL.9014881	0.862889	0.06887
hsa-miR-454-3p	ESR1	ER.alpha.R.V_GBL.9014870	0.919851	0.390977
hsa-miR-454-3p	GSK3B	GSK3.alpha.beta.M.V_GBL.9014954	0.984408	0.324735
hsa-miR-454-3p	KIT	c.Kit.R.V_GBL.9014850	0.75942	0.260234
hsa-miR-454-3p	MAPK1	MAPK_pT202_Y204.R.V_GBL.9014888	1.02441	0.196742
hsa-miR-454-3p	MAPK9	JNK2.R.C_GBL.9014886	1.0209	0.444345
hsa-miR-454-3p	MET	c.Met_pY1235.R.C_GBL.9014852	0.802922	0.00206196
hsa-miR-454-3p	NCOA3	AIB1.M.V_GBL.9014940	1.11835	0.0302282
hsa-miR-454-3p	PIK3CA	PI3K.p110.alpha.R.C_GBL.9014912	0.998521	0.492042
hsa-miR-454-3p	PRKAA1	AMPK_pT172.R.V_GBL.9014829	0.752616	0.00150476
hsa-miR-454-3p	PTEN	PTEN.R.V_GBL.9014918	1.13175	0.0605326
hsa-miR-454-3p	RPS6KB1	p70S6K.R.V_GBL.9014906	1.08357	0.152177
hsa-miR-454-3p	SMAD4	Smad4.M.V_GBL.9014964	1.01718	0.365208
hsa-miR-454-3p	STAT3	STAT3_pY705.R.V_GBL.9014927	1.33001	0.0053046
hsa-miR-454-3p	YWHAE	X14.3.3_epsilon.M.C_GBL.9014939	0.986137	0.397932
hsa-miR-455-5p	CDKN1B	p27.R.V_GBL.9014937	0.899571	0.194379
hsa-miR-455-5p	ESR1	ER.alpha.R.V_GBL.9014870	0.966033	0.453033
hsa-miR-455-5p	GSK3A	GSK3alpha.beta_pS21_S9.R.V_GBL.9014876	0.903656	0.0851274
hsa-miR-455-5p	GSK3B	GSK3alpha.beta_pS21_S9.R.V_GBL.9014876	0.903656	0.0851274
hsa-miR-455-5p	IGF1R	IGF.1R.beta.R.C_GBL.9014883	1.04627	0.0195724
hsa-miR-455-5p	KDR	VEGFR2.R.V_GBL.9014932	1.10757	0.217564
hsa-miR-455-5p	KIT	c.Kit.R.V_GBL.9014850	0.559575	0.13799
hsa-miR-455-5p	RAF1	C.Raf.R.V_GBL.9014857	0.8799	0.114352
hsa-miR-455-5p	RPS6KB1	p70S6K.R.V_GBL.9014906	0.682516	0.00912965
hsa-miR-455-5p	SNAI2	Snail.M.C_GBL.9014965	1.21939	0.190071
hsa-miR-483-3p	AKT1S1	PRAS40_pT246.R.V_GBL.9014915	1.23566	0.0213779
hsa-miR-483-3p	CTNNB1	beta.Catenin.R.V_GBL.9014836	0.932918	0.162411
hsa-miR-483-3p	DIABLO	Smac.M.V_GBL.9014956	0.554684	0.00475405
hsa-miR-483-3p	FN1	Fibronectin.R.C_GBL.9014872	0.933793	0.277276
hsa-miR-483-3p	IGF1R	IGF.1R.beta.R.C_GBL.9014883	1.23712	0.000187017
hsa-miR-483-3p	RPS6KB1	p70S6K_pT389.R.V_GBL.9014905	0.899681	0.00516771
hsa-miR-483-3p	SMAD4	Smad4.M.V_GBL.9014964	0.996643	0.472861
hsa-miR-486-3p	ACACA	ACC1.R.C_GBL.9014824	0.845001	0.0111174
hsa-miR-486-3p	BCL2L1	Bcl.X.R.V_GBL.9014835	0.882168	0.0407995
hsa-miR-486-3p	CASP9	Caspase.9_cleavedD330.R.C_GBL.9014841	1.04594	0.290135
hsa-miR-486-3p	DVL3	Dvl3.R.V_GBL.9014861	0.857154	0.120669
hsa-miR-486-3p	ESR1	ER.alpha_pS118.R.V_GBL.9014869	0.962792	0.0545458
hsa-miR-486-3p	GSK3A	GSK3alpha.beta_pS21_S9.R.V_GBL.9014876	0.839986	0.0292063
hsa-miR-486-3p	IGFBP2	IGFBP2.R.V_GBL.9014884	1.19694	0.0732514
hsa-miR-486-3p	JUN	c.Jun_pS73.R.C_GBL.9014849	1.19901	0.0157321
hsa-miR-486-3p	MAPK3	MAPK_pT202_Y204.R.V_GBL.9014888	0.933094	0.0361336
hsa-miR-486-3p	MAPT	Tau.M.C_GBL.9014968	2.16942	0.000113583
hsa-miR-486-3p	MET	c.Met_pY1235.R.C_GBL.9014852	0.769015	0.00129985
hsa-miR-486-3p	MYC	c.Myc.R.C_GBL.9014853	0.658674	0.000201311
hsa-miR-486-3p	NOTCH3	Notch3.R.C_GBL.9014897	1.07242	0.278917
hsa-miR-486-3p	PTCH1	PTCH.R.C_GBL.9014917	0.772867	0.00347534
hsa-miR-486-3p	PXN	Paxillin.R.V_GBL.9014908	0.807563	0.0174589
hsa-miR-486-3p	RAB25	Rab25.R.C_GBL.9014919	0.976861	0.390541
hsa-miR-486-3p	RAF1	C.Raf.R.V_GBL.9014857	0.558693	0.00579481
hsa-miR-486-3p	SMAD4	Smad4.M.V_GBL.9014964	0.947194	0.164504
hsa-miR-486-3p	SRC	Src_pY527.R.V_GBL.9014926	0.663702	0.053667
hsa-miR-486-3p	WWTR1	TAZ_pS89.R.C_GBL.9014930	1.06003	0.221775
hsa-miR-486-3p	YWHAE	X14.3.3_epsilon.M.C_GBL.9014939	1.05021	0.190683
hsa-miR-490-5p	CDH2	N.Cadherin.R.V_GBL.9014893	0.867899	0.0263854
hsa-miR-490-5p	CTNNB1	beta.Catenin.R.V_GBL.9014836	1.01219	0.422293
hsa-miR-490-5p	GSK3B	GSK3.alpha.beta.M.V_GBL.9014954	0.832546	0.00621164
hsa-miR-490-5p	MAPK9	JNK2.R.C_GBL.9014886	0.794475	0.115715
hsa-miR-490-5p	PECAM1	CD31.M.V_GBL.9014946	1.11647	0.0149898
hsa-miR-490-5p	PIK3CA	PI3K.p110.alpha.R.C_GBL.9014912	0.896101	0.112768
hsa-miR-490-5p	RPS6KB1	p70S6K_pT389.R.V_GBL.9014905	0.969884	0.0907612
hsa-miR-490-5p	WWTR1	TAZ_pS89.R.C_GBL.9014930	0.961664	0.30664
hsa-miR-491-3p	BCL2L11	Bim.R.V_GBL.9014838	1.2291	0.00795245
hsa-miR-491-3p	BIRC2	cIAP.R.V_GBL.9014848	0.74411	0.0025345
hsa-miR-491-3p	CCND1	Cyclin.D1.R.V_GBL.9014859	0.706047	0.0189039
hsa-miR-491-3p	FOXO3	FOXO3a.R.C_GBL.9014874	0.821382	0.0647055
hsa-miR-491-3p	IGFBP2	IGFBP2.R.V_GBL.9014884	0.944573	0.31081
hsa-miR-491-3p	IRS1	IRS1.R.V_GBL.9014885	1.15122	0.00232173
hsa-miR-491-3p	MYC	c.Myc.R.C_GBL.9014853	0.817183	0.00127342
hsa-miR-491-3p	PRKAA1	AMPK.alpha.R.C_GBL.9014828	0.762345	0.055176
hsa-miR-491-3p	SMAD4	Smad4.M.V_GBL.9014964	1.07603	0.0963344
hsa-miR-491-3p	TP53BP1	X53BP1.R.C_GBL.9014822	1.18125	0.0349345
hsa-miR-491-5p	AKT1	Akt_pT308.R.V_GBL.9014971	0.593359	0.200688
hsa-miR-491-5p	AR	AR.R.V_GBL.9014831	0.775948	0.0119014
hsa-miR-491-5p	BCL2L1	Bcl.X.R.V_GBL.9014835	0.48325	0.000738224
hsa-miR-491-5p	CTNNA1	alpha.Catenin.M.V_GBL.9014941	0.700496	0.312407
hsa-miR-491-5p	DIABLO	Smac.M.V_GBL.9014956	0.758016	0.0240811
hsa-miR-491-5p	MAPK1	MAPK_pT202_Y204.R.V_GBL.9014888	0.554737	0.000182951
hsa-miR-491-5p	NOTCH3	Notch3.R.C_GBL.9014897	1.02233	0.426169
hsa-miR-491-5p	PEA15	Pea.15.R.V_GBL.9014911	1.00467	0.480501
hsa-miR-491-5p	PGR	PR.R.V_GBL.9014916	1.52254	0.124302
hsa-miR-491-5p	PXN	Paxillin.R.V_GBL.9014908	0.506169	0.0012649
hsa-miR-491-5p	RAB25	Rab25.R.C_GBL.9014919	1.19525	0.0414591
hsa-miR-491-5p	SRC	Src_pY416.R.C_GBL.9014925	0.573035	0.00327649
hsa-miR-491-5p	TP53	p53.R.V_GBL.9014904	0.683681	0.183811
hsa-miR-491-5p	VASP	VASP.R.C_GBL.9014877	0.710641	0.0103554
hsa-miR-491-5p	YWHAE	X14.3.3_epsilon.M.C_GBL.9014939	1.13709	0.0340821
hsa-miR-494	BCL2L11	Bim.R.V_GBL.9014838	1.20743	0.0104102
hsa-miR-494	CCND1	Cyclin.D1.R.V_GBL.9014859	0.847073	0.0805281
hsa-miR-494	CDKN1B	p27_pT157.R.C_GBL.9014899	0.983272	0.405566
hsa-miR-494	CTNNB1	beta.Catenin.R.V_GBL.9014836	1.01184	0.424518
hsa-miR-494	FOXO3	FOXO3a.R.C_GBL.9014874	0.831233	0.072274
hsa-miR-494	IGF1R	IGF.1R.beta.R.C_GBL.9014883	0.685377	8.04456e-05
hsa-miR-494	IRS1	IRS1.R.V_GBL.9014885	1.57089	4.56299e-05
hsa-miR-494	MAP2K1	MEK1_pS217_S221.R.V_GBL.9014889	0.891183	0.0015154
hsa-miR-494	MAPK14	p38_pT180_Y182.R.V_GBL.9014903	0.822395	0.0360878
hsa-miR-494	MAPK9	JNK2.R.C_GBL.9014886	0.949943	0.369838
hsa-miR-494	NCOA3	AIB1.M.V_GBL.9014940	0.918246	0.0675633
hsa-miR-494	PECAM1	CD31.M.V_GBL.9014946	1.04372	0.119856
hsa-miR-494	PGR	PR.R.V_GBL.9014916	1.59496	0.101227
hsa-miR-494	PIK3R1	PI3K.p85.R.V_GBL.9014913	1.06651	0.056713
hsa-miR-494	PTEN	PTEN.R.V_GBL.9014918	0.746003	0.0128029
hsa-miR-494	RPS6KB1	p70S6K.R.V_GBL.9014906	1.00897	0.451402
hsa-miR-494	SMAD1	Smad1.R.V_GBL.9014923	0.838942	0.0635042
hsa-miR-494	SNAI2	Snail.M.C_GBL.9014965	1.37826	0.087434
hsa-miR-494	XIAP	XIAP.R.C_GBL.9014933	0.756341	0.012685
hsa-miR-494	YAP1	YAP_pS127.R.C_GBL.9014935	0.992632	0.459274
hsa-miR-494	YBX1	YB.1_pS102.R.V_GBL.9014934	0.868453	0.171847
hsa-miR-494	YWHAE	X14.3.3_epsilon.M.C_GBL.9014939	0.95693	0.222305
hsa-miR-505-3p	CDKN1B	p27_pT198.R.V_GBL.9014900	0.966258	0.410044
hsa-miR-505-3p	CHEK1	Chk1.R.C_GBL.9014846	0.874242	0.0103385
hsa-miR-505-3p	IGF1R	IGF.1R.beta.R.C_GBL.9014883	0.839559	0.000595968
hsa-miR-505-3p	KIT	c.Kit.R.V_GBL.9014850	1.04149	0.454153
hsa-miR-505-3p	PTK2	FAK.pY397_GBL.9014963	0.910872	0.0422618
hsa-miR-505-3p	YBX1	YB.1_pS102.R.V_GBL.9014934	1.24843	0.0621947
hsa-miR-506-3p	AKT1S1	PRAS40_pT246.R.V_GBL.9014915	0.865363	0.0740652
hsa-miR-506-3p	AKT2	Akt_pS473.R.V_GBL.9014825	0.498088	0.00743813
hsa-miR-506-3p	AKT3	Akt_pS473.R.V_GBL.9014825	0.498088	0.00743813
hsa-miR-506-3p	AR	AR.R.V_GBL.9014831	1.20416	0.0151944
hsa-miR-506-3p	BCL2L11	Bim.R.V_GBL.9014838	1.17158	0.0171382
hsa-miR-506-3p	BECN1	Beclin.G.V_GBL.9014969	0.841161	0.0610032
hsa-miR-506-3p	CAV1	Caveolin.1.R.V_GBL.9014842	0.45879	0.00713987
hsa-miR-506-3p	CDH2	N.Cadherin.R.V_GBL.9014893	0.886057	0.0373707
hsa-miR-506-3p	ERBB3	HER3.R.V_GBL.9014881	0.873721	0.0804808
hsa-miR-506-3p	GSK3B	GSK3alpha.beta_pS21_S9.R.V_GBL.9014876	0.946162	0.19468
hsa-miR-506-3p	IRS1	IRS1.R.V_GBL.9014885	1.23059	0.000677454
hsa-miR-506-3p	MAPK1	MAPK_pT202_Y204.R.V_GBL.9014888	1.01325	0.313422
hsa-miR-506-3p	MAPK14	p38_pT180_Y182.R.V_GBL.9014903	0.415718	0.00146283
hsa-miR-506-3p	NCOA3	AIB1.M.V_GBL.9014940	1.3663	0.00140073
hsa-miR-506-3p	PEA15	Pea.15.R.V_GBL.9014911	0.937504	0.264252
hsa-miR-506-3p	PIK3CA	PI3K.p110.alpha.R.C_GBL.9014912	1.00723	0.461199
hsa-miR-506-3p	RPS6KA1	p90RSK_pT359_S363.R.C_GBL.9014907	0.814312	0.0287189
hsa-miR-506-3p	RPS6KB1	p70S6K_pT389.R.V_GBL.9014905	0.96824	0.0825392
hsa-miR-506-3p	SMAD4	Smad4.M.V_GBL.9014964	0.948266	0.168677
hsa-miR-506-3p	SNAI2	Snail.M.C_GBL.9014965	1.36692	0.0922443
hsa-miR-506-3p	STAT3	STAT3_pY705.R.V_GBL.9014927	1.09515	0.0988634
hsa-miR-506-3p	YAP1	YAP_pS127.R.C_GBL.9014935	0.905684	0.12506
hsa-miR-507	AKT3	Akt_pS473.R.V_GBL.9014825	0.443626	0.0055921
hsa-miR-507	BCL2	Bcl.2.M.V_GBL.9014998	1.21514	0.105895
hsa-miR-507	CASP7	Caspase.7_cleavedD198.R.C_GBL.9014840	1.51449	0.0207665
hsa-miR-507	CTNNA1	alpha.Catenin.M.V_GBL.9014941	0.755887	0.343992
hsa-miR-507	ERRFI1	MIG.6.M.V_GBL.9014987	0.77242	0.0191446
hsa-miR-507	FOXO3	FOXO3A_pS318_S321.R.C_GBL.9014873	0.939536	0.284563
hsa-miR-507	GSK3B	GSK3alpha.beta_pS21_S9.R.V_GBL.9014876	0.818688	0.0215281
hsa-miR-507	IGF1R	IGF.1R.beta.R.C_GBL.9014883	0.908239	0.00303608
hsa-miR-507	PIK3R1	PI3K.p85.R.V_GBL.9014913	1.16575	0.00584464
hsa-miR-507	RPS6KB1	p70S6K_pT389.R.V_GBL.9014905	0.375371	2.36814e-05
hsa-miR-507	SNAI2	Snail.M.C_GBL.9014965	1.28181	0.139453
hsa-miR-507	WWTR1	TAZ_pS89.R.C_GBL.9014930	1.00705	0.46209
hsa-miR-507	XIAP	XIAP.R.C_GBL.9014933	0.732984	0.00993615
hsa-miR-515-3p	CASP7	Caspase.7_cleavedD198.R.C_GBL.9014840	0.792048	0.129841
hsa-miR-515-3p	CDH2	N.Cadherin.R.V_GBL.9014893	0.92186	0.0814207
hsa-miR-515-3p	CDKN1B	p27.R.V_GBL.9014937	0.762763	0.0490258
hsa-miR-515-3p	KIT	c.Kit.R.V_GBL.9014850	1.58675	0.087424
hsa-miR-515-3p	SMAD1	Smad1.R.V_GBL.9014923	0.91283	0.169498
hsa-miR-515-3p	SNAI2	Snail.M.C_GBL.9014965	1.07737	0.370665
hsa-miR-515-3p	YAP1	YAP_pS127.R.C_GBL.9014935	0.919998	0.157073
hsa-miR-516b-5p	AKT1	Akt_pS473.R.V_GBL.9014825	0.744882	0.0411303
hsa-miR-516b-5p	AKT3	Akt_pS473.R.V_GBL.9014825	0.744882	0.0411303
hsa-miR-516b-5p	CCNE1	Cyclin_E1.M.V_GBL.9014986	1.1181	0.0170815
hsa-miR-516b-5p	CDKN1B	p27_pT198.R.V_GBL.9014900	0.912338	0.282571
hsa-miR-516b-5p	FOXO3	FOXO3a.R.C_GBL.9014874	0.877553	0.12487
hsa-miR-516b-5p	GAB2	GAB2.R.V_GBL.9014875	0.656433	0.000368045
hsa-miR-516b-5p	IGF1R	IGF.1R.beta.R.C_GBL.9014883	1.18407	0.000396896
hsa-miR-516b-5p	JUN	c.Jun_pS73.R.C_GBL.9014849	1.60074	0.000697339
hsa-miR-516b-5p	MAPK9	JNK2.R.C_GBL.9014886	1.0281	0.425497
hsa-miR-516b-5p	NF2	NF2.R.C_GBL.9014894	1.01721	0.321942
hsa-miR-516b-5p	PIK3R1	PI3K.p85.R.V_GBL.9014913	0.747513	0.00176103
hsa-miR-516b-5p	PTCH1	PTCH.R.C_GBL.9014917	1.07914	0.0517926
hsa-miR-516b-5p	RAF1	C.Raf.R.V_GBL.9014857	0.932259	0.228773
hsa-miR-516b-5p	STAT3	STAT3_pY705.R.V_GBL.9014927	0.999208	0.494957
hsa-miR-518a-5p	BECN1	Beclin.G.V_GBL.9014969	0.821467	0.0477726
hsa-miR-518a-5p	CDH2	N.Cadherin.R.V_GBL.9014893	1.16015	0.0162938
hsa-miR-518a-5p	CTNNB1	beta.Catenin.R.V_GBL.9014836	0.909401	0.105386
hsa-miR-518a-5p	ERBB2	HER2.M.V_GBL.9014955	0.864905	0.0187345
hsa-miR-518a-5p	ERBB3	HER3_pY1298.R.C_GBL.9014880	0.887317	0.0387736
hsa-miR-518a-5p	ESR1	ER.alpha_pS118.R.V_GBL.9014869	0.898701	0.00432775
hsa-miR-518a-5p	FN1	Fibronectin.R.C_GBL.9014872	0.910702	0.218447
hsa-miR-518a-5p	FOXO3	FOXO3a.R.C_GBL.9014874	0.898414	0.161338
hsa-miR-518a-5p	GATA3	GATA3.M.V_GBL.9014953	1.14499	0.0118317
hsa-miR-518a-5p	GSK3A	GSK3alpha.beta_pS21_S9.R.V_GBL.9014876	0.916252	0.108139
hsa-miR-518a-5p	GSK3B	GSK3alpha.beta_pS21_S9.R.V_GBL.9014876	0.916252	0.108139
hsa-miR-518a-5p	IGF1R	IGF.1R.beta.R.C_GBL.9014883	1.23697	0.000187375
hsa-miR-518a-5p	KIT	c.Kit.R.V_GBL.9014850	1.00355	0.496065
hsa-miR-518a-5p	NOTCH1	Notch1.R.V_GBL.9014896	0.81932	0.0175796
hsa-miR-518a-5p	PEA15	Pea.15.R.V_GBL.9014911	0.956788	0.328407
hsa-miR-518a-5p	PRKCA	PKC.alpha_pS657.R.V_GBL.9014914	0.972011	0.205049
hsa-miR-518a-5p	PTEN	PTEN.R.V_GBL.9014918	1.19908	0.0238529
hsa-miR-518a-5p	RPS6KB1	p70S6K_pT389.R.V_GBL.9014905	0.91751	0.00886948
hsa-miR-518a-5p	SMAD4	Smad4.M.V_GBL.9014964	0.916888	0.0823252
hsa-miR-518a-5p	SRC	Src_pY527.R.V_GBL.9014926	0.691473	0.0640096
hsa-miR-518a-5p	STAT5A	STAT5.ALPHA.R.V_GBL.9014928	1.19561	0.00101553
hsa-miR-518a-5p	STMN1	Stathmin.R.V_GBL.9014929	1.22526	0.00795709
hsa-miR-518a-5p	YWHAE	X14.3.3_epsilon.M.C_GBL.9014939	0.972694	0.308312
hsa-miR-518d-5p	AKT3	Akt_pS473.R.V_GBL.9014825	0.655183	0.0200567
hsa-miR-518d-5p	BCL2L1	Bcl.xL.R.V_GBL.9014834	0.908158	0.171743
hsa-miR-518d-5p	CASP9	Caspase.9_cleavedD330.R.C_GBL.9014841	0.935994	0.226227
hsa-miR-518d-5p	CCND1	Cyclin.D1.R.V_GBL.9014859	1.01949	0.414273
hsa-miR-518d-5p	CDH2	N.Cadherin.R.V_GBL.9014893	1.03038	0.262895
hsa-miR-518d-5p	FN1	Fibronectin.R.C_GBL.9014872	1.18313	0.0819478
hsa-miR-518d-5p	FOXO3	FOXO3A_pS318_S321.R.C_GBL.9014873	0.873148	0.136718
hsa-miR-518d-5p	GSK3B	GSK3alpha.beta_pS21_S9.R.V_GBL.9014876	0.938316	0.166701
hsa-miR-518d-5p	IGF1R	IGF.1R.beta.R.C_GBL.9014883	1.14337	0.00083029
hsa-miR-518d-5p	PEA15	Pea.15.R.V_GBL.9014911	0.956509	0.327409
hsa-miR-518d-5p	PTEN	PTEN.R.V_GBL.9014918	1.03011	0.328689
hsa-miR-518d-5p	PTK2	FAK.R.C_GBL.9014871	0.985519	0.298092
hsa-miR-519d	AKT3	Akt.R.V_GBL.9014827	0.921234	0.0909857
hsa-miR-519d	BCL2L11	Bim.R.V_GBL.9014838	1.15981	0.0205235
hsa-miR-519d	BECN1	Beclin.G.V_GBL.9014969	0.822446	0.0483423
hsa-miR-519d	BID	Bid.R.C_GBL.9014837	0.914588	0.0940799
hsa-miR-519d	CASP7	Caspase.7_cleavedD198.R.C_GBL.9014840	0.874303	0.231762
hsa-miR-519d	CCND1	Cyclin.D1.R.V_GBL.9014859	0.803945	0.049044
hsa-miR-519d	CDKN1A	p21.R.C_GBL.9014898	0.829	0.027849
hsa-miR-519d	CTNNB1	beta.Catenin.R.V_GBL.9014836	0.765778	0.013108
hsa-miR-519d	ERBB3	HER3_pY1298.R.C_GBL.9014880	0.997632	0.479606
hsa-miR-519d	ESR1	ER.alpha_pS118.R.V_GBL.9014869	0.961317	0.0502495
hsa-miR-519d	IRS1	IRS1.R.V_GBL.9014885	1.08316	0.0122738
hsa-miR-519d	MAPK1	MAPK_pT202_Y204.R.V_GBL.9014888	0.860106	0.005362
hsa-miR-519d	NCOA3	AIB1.M.V_GBL.9014940	0.982363	0.345407
hsa-miR-519d	PIK3R1	PI3K.p85.R.V_GBL.9014913	1.00877	0.39459
hsa-miR-519d	PTEN	PTEN.R.V_GBL.9014918	0.972321	0.341287
hsa-miR-519d	PTK2	FAK.R.C_GBL.9014871	0.968752	0.146046
hsa-miR-519d	RB1	Rb.M.V_GBL.9014952	0.881295	0.0943684
hsa-miR-519d	RPS6KA1	p90RSK_pT359_S363.R.C_GBL.9014907	0.78704	0.0205221
hsa-miR-519d	SMAD1	Smad1.R.V_GBL.9014923	0.811878	0.0458972
hsa-miR-519d	SMAD4	Smad4.M.V_GBL.9014964	0.938163	0.133275
hsa-miR-519d	STAT3	STAT3_pY705.R.V_GBL.9014927	1.14563	0.0429469
hsa-miR-519d	VASP	VASP.R.C_GBL.9014877	0.946943	0.2357
hsa-miR-519d	XIAP	XIAP.R.C_GBL.9014933	0.665919	0.00536786
hsa-miR-520b	BCL2L11	Bim.R.V_GBL.9014838	1.14781	0.0249025
hsa-miR-520b	CCND1	Cyclin.D1.R.V_GBL.9014859	0.971739	0.377347
hsa-miR-520b	ESR1	ER.alpha.R.V_GBL.9014870	0.954795	0.43767
hsa-miR-520b	FOXO3	FOXO3a.R.C_GBL.9014874	0.737218	0.0276003
hsa-miR-520b	GAB2	GAB2.R.V_GBL.9014875	1.0677	0.0332496
hsa-miR-520b	IGF1R	IGF.1R.beta.R.C_GBL.9014883	0.935079	0.00800845
hsa-miR-520b	KIT	c.Kit.R.V_GBL.9014850	1.04757	0.447494
hsa-miR-520b	NCOA3	AIB1.M.V_GBL.9014940	1.18152	0.0101789
hsa-miR-520b	PECAM1	CD31.M.V_GBL.9014946	0.995588	0.446001
hsa-miR-520b	PIK3CA	PI3K.p110.alpha.R.C_GBL.9014912	0.791429	0.0276292
hsa-miR-520b	PTEN	PTEN.R.V_GBL.9014918	0.870589	0.0627593
hsa-miR-520b	PTK2	FAK.R.C_GBL.9014871	0.951594	0.0713684
hsa-miR-520b	RPS6KA1	p90RSK_pT359_S363.R.C_GBL.9014907	1.09387	0.113021
hsa-miR-525-3p	CTNNB1	beta.Catenin.R.V_GBL.9014836	1.06017	0.184688
hsa-miR-525-3p	GATA3	GATA3.M.V_GBL.9014953	1.00202	0.478204
hsa-miR-525-3p	GSK3B	GSK3.alpha.beta.M.V_GBL.9014954	1.05373	0.0906704
hsa-miR-525-3p	SNAI2	Snail.M.C_GBL.9014965	1.34024	0.1048
hsa-miR-525-3p	STAT3	STAT3_pY705.R.V_GBL.9014927	1.20597	0.0187848
hsa-miR-525-3p	VASP	VASP.R.C_GBL.9014877	1.08463	0.140594
hsa-miR-525-3p	YAP1	YAP_pS127.R.C_GBL.9014935	0.980536	0.39414
hsa-miR-525-3p	YBX1	YB.1_pS102.R.V_GBL.9014934	1.07731	0.278419
hsa-miR-526b-3p	AKT3	Akt.R.V_GBL.9014827	0.895708	0.0529141
hsa-miR-526b-3p	BCL2L11	Bim.R.V_GBL.9014838	1.22176	0.00869105
hsa-miR-526b-3p	BECN1	Beclin.G.V_GBL.9014969	0.724988	0.0171051
hsa-miR-526b-3p	BID	Bid.R.C_GBL.9014837	0.924902	0.116188
hsa-miR-526b-3p	CASP7	Caspase.7_cleavedD198.R.C_GBL.9014840	0.753869	0.099668
hsa-miR-526b-3p	CCND1	Cyclin.D1.R.V_GBL.9014859	0.923995	0.212576
hsa-miR-526b-3p	CDKN1A	p21.R.C_GBL.9014898	0.818848	0.0242082
hsa-miR-526b-3p	ERBB3	HER3_pY1298.R.C_GBL.9014880	0.945733	0.146482
hsa-miR-526b-3p	ESR1	ER.alpha_pS118.R.V_GBL.9014869	0.932906	0.0133614
hsa-miR-526b-3p	MAPK1	MAPK_pT202_Y204.R.V_GBL.9014888	0.848989	0.00432538
hsa-miR-526b-3p	NCOA3	AIB1.M.V_GBL.9014940	1.01636	0.355805
hsa-miR-526b-3p	PARP1	PARP_cleaved.M.C_GBL.9014960	0.908915	0.0301489
hsa-miR-526b-3p	PIK3R1	PI3K.p85.R.V_GBL.9014913	0.878932	0.0136922
hsa-miR-526b-3p	PTEN	PTEN.R.V_GBL.9014918	1.07759	0.147713
hsa-miR-526b-3p	PTK2	FAK.R.C_GBL.9014871	0.857971	0.00511154
hsa-miR-526b-3p	RB1	Rb_pS807_S811.R.V_GBL.9014920	0.894598	0.101778
hsa-miR-526b-3p	RPS6KA1	p90RSK_pT359_S363.R.C_GBL.9014907	0.864193	0.0577046
hsa-miR-526b-3p	SMAD1	Smad1.R.V_GBL.9014923	0.83079	0.0574549
hsa-miR-526b-3p	SMAD4	Smad4.M.V_GBL.9014964	0.970829	0.283183
hsa-miR-526b-3p	STAT3	STAT3_pY705.R.V_GBL.9014927	1.11311	0.072412
hsa-miR-526b-3p	VASP	VASP.R.C_GBL.9014877	1.02289	0.373166
hsa-miR-526b-3p	XIAP	XIAP.R.C_GBL.9014933	0.657002	0.00498615
hsa-miR-526b-3p	YAP1	YAP_pS127.R.C_GBL.9014935	0.984739	0.4164
hsa-miR-539-5p	AKT1	Akt_pS473.R.V_GBL.9014825	0.436517	0.0053973
hsa-miR-539-5p	AKT3	Akt_pS473.R.V_GBL.9014825	0.436517	0.0053973
hsa-miR-539-5p	BCL2L11	Bim.R.V_GBL.9014838	1.76752	0.000240013
hsa-miR-539-5p	CAV1	Caveolin.1.R.V_GBL.9014842	0.864469	0.144237
hsa-miR-539-5p	CTNNA1	alpha.Catenin.M.V_GBL.9014941	0.77347	0.354407
hsa-miR-539-5p	EGFR	EGFR.R.C_GBL.9014867	0.858618	0.0776954
hsa-miR-539-5p	EIF4E	eIF4E.R.V_GBL.9014868	1.11988	0.128331
hsa-miR-539-5p	ESR1	ER.alpha_pS118.R.V_GBL.9014869	0.967186	0.0702297
hsa-miR-539-5p	FN1	Fibronectin.R.C_GBL.9014872	1.07472	0.254223
hsa-miR-539-5p	FOXO3	FOXO3a.R.C_GBL.9014874	0.823106	0.0659597
hsa-miR-539-5p	GSK3B	GSK3alpha.beta_pS21_S9.R.V_GBL.9014876	0.900792	0.0807095
hsa-miR-539-5p	IGF1R	IGF.1R.beta.R.C_GBL.9014883	0.957299	0.0239031
hsa-miR-539-5p	MAPK1	MAPK_pT202_Y204.R.V_GBL.9014888	0.973897	0.182883
hsa-miR-539-5p	MAPK14	p38_MAPK.R.C_GBL.9014902	0.772682	0.0341371
hsa-miR-539-5p	NFKB1	NF.kB.p65_pS536.R.C_GBL.9014895	1.07661	0.0794463
hsa-miR-539-5p	PIK3R1	PI3K.p85.R.V_GBL.9014913	1.13387	0.010486
hsa-miR-539-5p	PRKAA1	AMPK.alpha.R.C_GBL.9014828	1.00658	0.477157
hsa-miR-539-5p	PTEN	PTEN.R.V_GBL.9014918	1.20161	0.0231229
hsa-miR-539-5p	PTK2	FAK.R.C_GBL.9014871	0.985106	0.293148
hsa-miR-539-5p	RAD50	Rad50.M.C_GBL.9014944	1.02323	0.0387048
hsa-miR-539-5p	RB1	Rb_pS807_S811.R.V_GBL.9014920	0.885082	0.0877097
hsa-miR-539-5p	SMAD4	Smad4.M.V_GBL.9014964	1.0061	0.450806
hsa-miR-539-5p	YBX1	YB.1_pS102.R.V_GBL.9014934	1.16923	0.12237
hsa-miR-542-3p	GSK3B	GSK3.alpha.beta.M.V_GBL.9014954	0.894238	0.0210282
hsa-miR-542-3p	JUN	c.Jun_pS73.R.C_GBL.9014849	1.13562	0.0399536
hsa-miR-542-3p	MAP2K1	MEK1.R.V_GBL.9014890	0.874825	0.0256893
hsa-miR-542-3p	MAPK3	MAPK_pT202_Y204.R.V_GBL.9014888	0.668556	0.000439716
hsa-miR-542-3p	MAPK9	JNK2.R.C_GBL.9014886	0.85005	0.177374
hsa-miR-542-3p	PIK3R1	PI3K.p85.R.V_GBL.9014913	0.930016	0.0509708
hsa-miR-542-3p	PTEN	PTEN.R.V_GBL.9014918	0.995663	0.474052
hsa-miR-542-3p	PTGS2	COX.2.R.C_GBL.9014979	0.760728	0.0292831
hsa-miR-542-3p	RPS6KB1	p70S6K.R.V_GBL.9014906	1.02929	0.347038
hsa-miR-542-3p	VASP	VASP.R.C_GBL.9014877	1.0231	0.372067
hsa-miR-552	AKT3	Akt_pS473.R.V_GBL.9014825	0.433063	0.00530584
hsa-miR-552	CAV1	Caveolin.1.R.V_GBL.9014842	0.454554	0.00698811
hsa-miR-552	CTNNB1	beta.Catenin.R.V_GBL.9014836	0.876566	0.0596884
hsa-miR-552	ERRFI1	MIG.6.M.V_GBL.9014957	1.36971	0.000809263
hsa-miR-552	ESR1	ER.alpha.R.V_GBL.9014870	0.876661	0.336584
hsa-miR-552	GSK3B	GSK3.alpha.beta.M.V_GBL.9014954	0.964278	0.166259
hsa-miR-552	IGF1R	IGF.1R.beta.R.C_GBL.9014883	0.965599	0.0397985
hsa-miR-552	MAPK9	JNK2.R.C_GBL.9014886	1.04033	0.394078
hsa-miR-552	PIK3R1	PI3K.p85.R.V_GBL.9014913	0.975439	0.236523
hsa-miR-552	PTGS2	COX.2.R.C_GBL.9014979	1.23887	0.0294011
hsa-miR-552	RPS6KB1	p70S6K.R.V_GBL.9014906	0.667868	0.00807485
hsa-miR-552	SMAD3	Smad3.R.V_GBL.9014924	0.854217	0.0481338
hsa-miR-552	SMAD4	Smad4.M.V_GBL.9014964	0.991229	0.429592
hsa-miR-552	YBX1	YB.1_pS102.R.V_GBL.9014934	1.47859	0.0132886
hsa-miR-555	BCL2	Bcl.2.M.V_GBL.9014998	1.24418	0.0852226
hsa-miR-555	FOXO3	FOXO3A_pS318_S321.R.C_GBL.9014873	0.890267	0.165525
hsa-miR-555	PARP1	PARP_cleaved.M.C_GBL.9014960	0.931367	0.0565954
hsa-miR-555	PGR	PR.R.V_GBL.9014916	2.16465	0.0249958
hsa-miR-555	PTEN	PTEN.R.V_GBL.9014918	1.27777	0.0100864
hsa-miR-561-3p	AKT1	Akt_pS473.R.V_GBL.9014825	0.398953	0.00450307
hsa-miR-561-3p	AKT3	Akt_pS473.R.V_GBL.9014825	0.398953	0.00450307
hsa-miR-561-3p	BCL2L11	Bim.R.V_GBL.9014838	1.11945	0.0410333
hsa-miR-561-3p	CDH3	P.Cadherin.R.C_GBL.9014909	0.806704	0.0707483
hsa-miR-561-3p	CDKN1B	p27_pT198.R.V_GBL.9014900	0.895922	0.249923
hsa-miR-561-3p	CHEK1	Chk1_pS345.R.C_GBL.9014845	0.958088	0.268377
hsa-miR-561-3p	CTNNA1	alpha.Catenin.M.V_GBL.9014941	0.650017	0.285378
hsa-miR-561-3p	CTNNB1	beta.Catenin.R.V_GBL.9014836	0.927277	0.146257
hsa-miR-561-3p	GSK3B	GSK3.alpha.beta.M.V_GBL.9014954	0.971578	0.213334
hsa-miR-561-3p	KIT	c.Kit.R.V_GBL.9014850	1.23374	0.265765
hsa-miR-561-3p	MAPK14	p38_MAPK.R.C_GBL.9014902	0.838133	0.0704451
hsa-miR-561-3p	MSH6	MSH6.R.C_GBL.9014892	0.921563	0.0579937
hsa-miR-561-3p	MYC	c.Myc.R.C_GBL.9014853	1.09512	0.00816348
hsa-miR-561-3p	PIK3CA	PI3K.p110.alpha.R.C_GBL.9014912	0.943797	0.235434
hsa-miR-561-3p	PRKCA	PKC.alpha.M.V_GBL.9014962	0.879359	0.0502265
hsa-miR-561-3p	PTCH1	PTCH.R.C_GBL.9014917	1.24902	0.00267164
hsa-miR-561-3p	PTEN	PTEN.R.V_GBL.9014918	1.05353	0.223617
hsa-miR-561-3p	RPS6KB1	p70S6K_pT389.R.V_GBL.9014905	0.81121	0.000834553
hsa-miR-561-3p	SMAD4	Smad4.M.V_GBL.9014964	0.944502	0.154472
hsa-miR-561-3p	TP53BP1	X53BP1.R.C_GBL.9014822	0.905948	0.123432
hsa-miR-561-3p	YAP1	YAP_pS127.R.C_GBL.9014935	0.898705	0.112054
hsa-miR-561-3p	YBX1	YB.1_pS102.R.V_GBL.9014934	1.23616	0.0687498
hsa-miR-561-3p	YWHAE	X14.3.3_epsilon.M.C_GBL.9014939	1.12488	0.042135
hsa-miR-567	BCL2L11	Bim.R.V_GBL.9014838	0.980138	0.348653
hsa-miR-567	CDH2	N.Cadherin.R.V_GBL.9014893	0.950077	0.162154
hsa-miR-567	EIF4E	eIF4E.R.V_GBL.9014868	0.909631	0.184722
hsa-miR-567	GATA3	GATA3.M.V_GBL.9014953	0.994337	0.439164
hsa-miR-567	GSK3B	GSK3.alpha.beta.M.V_GBL.9014954	0.853555	0.00897544
hsa-miR-567	KIT	c.Kit.R.V_GBL.9014850	0.729661	0.237242
hsa-miR-567	MET	c.Met.M.C_GBL.9014985	0.961742	0.222582
hsa-miR-567	PTEN	PTEN.R.V_GBL.9014918	1.04066	0.277476
hsa-miR-567	PTK2	FAK.pY397_GBL.9014963	1.02642	0.252929
hsa-miR-567	SMAD1	Smad1.R.V_GBL.9014923	0.871159	0.0960676
hsa-miR-570-3p	BCL2L11	Bim.R.V_GBL.9014838	1.03558	0.24937
hsa-miR-570-3p	BECN1	Beclin.G.V_GBL.9014969	1.03324	0.342418
hsa-miR-570-3p	CDH2	N.Cadherin.R.V_GBL.9014893	1.06556	0.110047
hsa-miR-570-3p	CDKN1B	p27.R.V_GBL.9014937	0.804136	0.0723636
hsa-miR-570-3p	CTNNB1	beta.Catenin.R.V_GBL.9014836	0.891102	0.0762743
hsa-miR-570-3p	ERRFI1	MIG.6.M.V_GBL.9014957	1.11536	0.0208388
hsa-miR-570-3p	FOXO3	FOXO3a.R.C_GBL.9014874	0.772618	0.038707
hsa-miR-570-3p	GSK3B	GSK3.alpha.beta.M.V_GBL.9014954	0.967724	0.187079
hsa-miR-570-3p	IGF1R	IGF.1R.beta.R.C_GBL.9014883	0.771553	0.000208969
hsa-miR-570-3p	IRS1	IRS1.R.V_GBL.9014885	0.812656	0.00124655
hsa-miR-570-3p	MET	c.Met.M.C_GBL.9014985	0.925675	0.0935299
hsa-miR-570-3p	PCNA	PCNA.M.V_GBL.9014961	0.858863	0.159178
hsa-miR-570-3p	PEA15	Pea.15.R.V_GBL.9014911	0.93419	0.254259
hsa-miR-570-3p	PTCH1	PTCH.R.C_GBL.9014917	1.22622	0.00351531
hsa-miR-570-3p	PTEN	PTEN.R.V_GBL.9014918	1.02707	0.344481
hsa-miR-570-3p	RAF1	C.Raf.R.V_GBL.9014857	0.748479	0.0254776
hsa-miR-570-3p	RPS6KB1	p70S6K.R.V_GBL.9014906	0.789552	0.0263783
hsa-miR-570-3p	SMAD1	Smad1.R.V_GBL.9014923	0.887967	0.120427
hsa-miR-570-3p	SMAD4	Smad4.M.V_GBL.9014964	0.976157	0.317945
hsa-miR-570-3p	XIAP	XIAP.R.C_GBL.9014933	0.836371	0.0342321
hsa-miR-570-3p	YAP1	YAP_pS127.R.C_GBL.9014935	0.923226	0.165401
hsa-miR-570-3p	YWHAE	X14.3.3_epsilon.M.C_GBL.9014939	0.937237	0.145373
hsa-miR-582-5p	ACACA	ACC1.R.C_GBL.9014824	0.673235	0.00135722
hsa-miR-582-5p	CDH2	N.Cadherin.R.V_GBL.9014893	0.969503	0.262152
hsa-miR-582-5p	CTNNB1	beta.Catenin.R.V_GBL.9014836	0.818255	0.0249895
hsa-miR-582-5p	EIF4E	eIF4E.R.V_GBL.9014868	0.938183	0.261592
hsa-miR-582-5p	GSK3B	GSK3alpha.beta_pS21_S9.R.V_GBL.9014876	0.816807	0.0209799
hsa-miR-582-5p	KIT	c.Kit.R.V_GBL.9014850	1.41115	0.151504
hsa-miR-582-5p	MAPK14	p38_pT180_Y182.R.V_GBL.9014903	0.81626	0.0333608
hsa-miR-582-5p	MET	c.Met_pY1235.R.C_GBL.9014852	0.894925	0.0119482
hsa-miR-582-5p	NOTCH1	Notch1.R.V_GBL.9014896	1.05601	0.169326
hsa-miR-582-5p	PIK3R1	PI3K.p85.R.V_GBL.9014913	0.98362	0.311572
hsa-miR-582-5p	PTCH1	PTCH.R.C_GBL.9014917	1.11859	0.0201967
hsa-miR-582-5p	PTEN	PTEN.R.V_GBL.9014918	0.961713	0.288465
hsa-miR-582-5p	PTK2	FAK.R.C_GBL.9014871	0.918675	0.022556
hsa-miR-582-5p	RB1	Rb_pS807_S811.R.V_GBL.9014920	0.812757	0.0317941
hsa-miR-582-5p	SMAD1	Smad1.R.V_GBL.9014923	0.886257	0.117661
hsa-miR-582-5p	STMN1	Stathmin.R.V_GBL.9014929	0.980991	0.352419
hsa-miR-582-5p	WWTR1	TAZ_pS89.R.C_GBL.9014930	0.960588	0.30192
hsa-miR-584-5p	ANXA1	Annexin.I.R.V_GBL.9014990	0.691996	0.00372869
hsa-miR-584-5p	ERBB3	HER3.R.V_GBL.9014881	0.921367	0.166082
hsa-miR-584-5p	FOXO3	FOXO3a.R.C_GBL.9014874	0.856759	0.0972133
hsa-miR-584-5p	GATA3	GATA3.M.V_GBL.9014953	1.07757	0.0534098
hsa-miR-584-5p	GSK3B	GSK3alpha.beta_pS21_S9.R.V_GBL.9014876	0.81994	0.0219032
hsa-miR-584-5p	MAPK14	p38_pT180_Y182.R.V_GBL.9014903	1.10139	0.10876
hsa-miR-584-5p	MAPK9	JNK2.R.C_GBL.9014886	0.907594	0.274622
hsa-miR-584-5p	PIK3CA	PI3K.p110.alpha.R.C_GBL.9014912	0.684211	0.00952281
hsa-miR-584-5p	PRKAA1	AMPK.alpha.R.C_GBL.9014828	0.814625	0.0890441
hsa-miR-584-5p	PTEN	PTEN.R.V_GBL.9014918	0.924528	0.153209
hsa-miR-584-5p	RPS6KB1	p70S6K.R.V_GBL.9014906	0.995158	0.473706
hsa-miR-584-5p	WWTR1	TAZ_pS89.R.C_GBL.9014930	0.962669	0.311094
hsa-miR-584-5p	XIAP	XIAP.R.C_GBL.9014933	0.809359	0.0237512
hsa-miR-601	IGF1R	IGF.1R.beta.R.C_GBL.9014883	1.08357	0.00396194
hsa-miR-601	MAP2K1	MEK1_pS217_S221.R.V_GBL.9014889	1.0573	0.00929315
hsa-miR-601	MET	c.Met.M.C_GBL.9014985	1.05685	0.141818
hsa-miR-601	PTK2	FAK.R.C_GBL.9014871	0.864223	0.0057966
hsa-miR-601	XIAP	XIAP.R.C_GBL.9014933	0.887211	0.0751273
hsa-miR-609	MET	c.Met.M.C_GBL.9014985	0.92353	0.0889912
hsa-miR-615-3p	AKT2	Akt_pS473.R.V_GBL.9014825	0.476088	0.00660859
hsa-miR-615-3p	GATA3	GATA3.M.V_GBL.9014953	1.02102	0.290126
hsa-miR-615-3p	JUN	c.Jun_pS73.R.C_GBL.9014849	1.02564	0.327951
hsa-miR-615-3p	MAPT	Tau.M.C_GBL.9014968	1.77311	0.000389124
hsa-miR-621	AKT3	Akt_pS473.R.V_GBL.9014825	0.734547	0.0376045
hsa-miR-621	CTNNB1	beta.Catenin.R.V_GBL.9014836	0.900082	0.0892211
hsa-miR-621	IGF1R	IGF.1R.beta.R.C_GBL.9014883	0.942753	0.0112508
hsa-miR-621	MAPK1	MAPK_pT202_Y204.R.V_GBL.9014888	0.923604	0.0264188
hsa-miR-621	MAPK3	MAPK_pT202_Y204.R.V_GBL.9014888	0.923604	0.0264188
hsa-miR-621	MET	c.Met.M.C_GBL.9014985	1.05692	0.141561
hsa-miR-621	YAP1	YAP_pS127.R.C_GBL.9014935	0.93725	0.206928
hsa-miR-624-5p	AKT3	Akt_pS473.R.V_GBL.9014825	0.509806	0.00793577
hsa-miR-624-5p	BIRC2	cIAP.R.V_GBL.9014848	0.726912	0.00210113
hsa-miR-624-5p	CASP3	Caspase.3_active.R.C_GBL.9014991	0.900078	0.199963
hsa-miR-624-5p	CDH2	N.Cadherin.R.V_GBL.9014893	0.938132	0.12048
hsa-miR-624-5p	CTNNB1	beta.Catenin.R.V_GBL.9014836	0.927743	0.147528
hsa-miR-624-5p	GSK3B	GSK3alpha.beta_pS21_S9.R.V_GBL.9014876	0.646584	0.00355479
hsa-miR-624-5p	IRS1	IRS1.R.V_GBL.9014885	0.993741	0.386179
hsa-miR-624-5p	MAP2K1	MEK1.R.V_GBL.9014890	0.668599	0.00181177
hsa-miR-624-5p	MET	c.Met_pY1235.R.C_GBL.9014852	0.767999	0.0012833
hsa-miR-624-5p	MYC	c.Myc.R.C_GBL.9014853	0.672178	0.000227007
hsa-miR-624-5p	PTGS2	COX.2.R.C_GBL.9014979	0.96463	0.344656
hsa-miR-624-5p	SMAD3	Smad3.R.V_GBL.9014924	0.919673	0.139272
hsa-miR-624-5p	WWTR1	TAZ_pS89.R.C_GBL.9014930	1.0622	0.214495
hsa-miR-625-5p	AKT1	Akt_pS473.R.V_GBL.9014825	0.813566	0.0783115
hsa-miR-625-5p	AKT2	Akt_pS473.R.V_GBL.9014825	0.813566	0.0783115
hsa-miR-625-5p	AKT3	Akt_pS473.R.V_GBL.9014825	0.813566	0.0783115
hsa-miR-625-5p	BCL2L11	Bim.R.V_GBL.9014838	0.951383	0.18573
hsa-miR-625-5p	CCND1	Cyclin.D1.R.V_GBL.9014859	0.990321	0.457043
hsa-miR-625-5p	CDH2	N.Cadherin.R.V_GBL.9014893	0.928548	0.0954215
hsa-miR-625-5p	CDH3	P.Cadherin.R.C_GBL.9014909	0.990131	0.462853
hsa-miR-625-5p	CTNNA1	alpha.Catenin.M.V_GBL.9014941	0.707925	0.31653
hsa-miR-625-5p	ESR1	ER.alpha.R.V_GBL.9014870	0.991735	0.488533
hsa-miR-625-5p	IGF1R	IGF.1R.beta.R.C_GBL.9014883	0.81347	0.000381611
hsa-miR-625-5p	NCOA3	AIB1.M.V_GBL.9014940	0.931076	0.0926322
hsa-miR-625-5p	NF2	NF2.R.C_GBL.9014894	0.964355	0.183334
hsa-miR-625-5p	PEA15	Pea.15.R.V_GBL.9014911	1.17895	0.0673326
hsa-miR-625-5p	PGR	PR.R.V_GBL.9014916	1.82045	0.0553756
hsa-miR-625-5p	STAT3	STAT3_pY705.R.V_GBL.9014927	0.905127	0.0993496
hsa-miR-625-5p	SYK	Syk.M.V_GBL.9014989	1.23405	0.108918
hsa-miR-625-5p	VASP	VASP.R.C_GBL.9014877	0.988861	0.436998
hsa-miR-625-5p	YWHAE	X14.3.3_epsilon.M.C_GBL.9014939	0.76404	0.00855622
hsa-miR-629-3p	AKT3	Akt_pS473.R.V_GBL.9014825	0.823569	0.0865962
hsa-miR-629-3p	CDH2	N.Cadherin.R.V_GBL.9014893	0.982788	0.356128
hsa-miR-629-3p	ERRFI1	MIG.6.M.V_GBL.9014957	1.05016	0.116569
hsa-miR-629-3p	ESR1	ER.alpha.R.V_GBL.9014870	0.933919	0.409542
hsa-miR-629-3p	MAPK14	p38_MAPK.R.C_GBL.9014902	0.678183	0.0144393
hsa-miR-629-3p	PIK3R1	PI3K.p85.R.V_GBL.9014913	1.07106	0.0493435
hsa-miR-629-3p	PTCH1	PTCH.R.C_GBL.9014917	1.12444	0.0178776
hsa-miR-629-3p	RAF1	C.Raf.R.V_GBL.9014857	0.982258	0.419016
hsa-miR-629-3p	SMAD4	Smad4.M.V_GBL.9014964	1.131	0.031646
hsa-miR-629-3p	STAT3	STAT3_pY705.R.V_GBL.9014927	1.02994	0.319856
hsa-miR-629-3p	STMN1	Stathmin.R.V_GBL.9014929	0.893117	0.0504407
hsa-miR-629-3p	SYK	Syk.M.V_GBL.9014989	1.39182	0.0400907
hsa-miR-629-3p	VASP	VASP.R.C_GBL.9014877	0.765441	0.0179553
hsa-miR-636	CCND1	Cyclin.D1.R.V_GBL.9014859	0.833478	0.0685282
hsa-miR-636	CCNE1	Cyclin_E1.M.V_GBL.9014986	0.98227	0.308437
hsa-miR-636	GAB2	GAB2.R.V_GBL.9014875	0.695606	0.000526716
hsa-miR-636	GSK3B	GSK3alpha.beta_pS21_S9.R.V_GBL.9014876	0.898078	0.0767666
hsa-miR-636	KIT	c.Kit.R.V_GBL.9014850	0.970536	0.467387
hsa-miR-636	MAPT	Tau.M.C_GBL.9014968	1.65562	0.00063362
hsa-miR-636	PEA15	Pea.15.R.V_GBL.9014911	0.98321	0.430378
hsa-miR-636	PIK3R1	PI3K.p85.R.V_GBL.9014913	1.06295	0.0634121
hsa-miR-636	RPS6KB1	p70S6K_pT389.R.V_GBL.9014905	0.949137	0.0305809
hsa-miR-636	SNAI2	Snail.M.C_GBL.9014965	1.01045	0.48204
hsa-miR-636	TP53	p53.R.V_GBL.9014904	0.969063	0.46205
hsa-miR-636	YAP1	YAP.R.V_GBL.9014936	1.08496	0.131502
hsa-miR-636	YBX1	YB.1_pS102.R.V_GBL.9014934	0.998766	0.496132
hsa-miR-637	AKT3	Akt_pS473.R.V_GBL.9014825	0.654979	0.0200269
hsa-miR-637	BAK1	Bak.R.C_GBL.9014832	0.941183	0.148941
hsa-miR-637	BCL2L1	Bcl.xL.R.V_GBL.9014834	0.823535	0.0600011
hsa-miR-637	CCND1	Cyclin.D1.R.V_GBL.9014859	0.922011	0.20727
hsa-miR-637	CDH2	N.Cadherin.R.V_GBL.9014893	0.927158	0.0922974
hsa-miR-637	CDKN1A	p21.R.C_GBL.9014898	1.0164	0.394693
hsa-miR-637	EGFR	EGFR_pY1173.R.C_GBL.9014865	1.02312	0.37174
hsa-miR-637	EIF4E	eIF4E.R.V_GBL.9014868	0.997489	0.489244
hsa-miR-637	ERBB3	HER3_pY1298.R.C_GBL.9014880	1.08478	0.0705052
hsa-miR-637	ERCC1	ERCC1.M.C_GBL.9014951	0.866025	0.0606035
hsa-miR-637	GATA3	GATA3.M.V_GBL.9014953	0.839314	0.00897743
hsa-miR-637	JUN	c.Jun_pS73.R.C_GBL.9014849	0.983112	0.383397
hsa-miR-637	MAPK14	p38_MAPK.R.C_GBL.9014902	0.98415	0.429028
hsa-miR-637	MAPT	Tau.M.C_GBL.9014968	0.940218	0.178157
hsa-miR-637	PRKCA	PKC.alpha_pS657.R.V_GBL.9014914	1.00699	0.413403
hsa-miR-637	RAD51	Rad51.M.C_GBL.9014988	0.82778	0.161051
hsa-miR-637	SMAD3	Smad3.R.V_GBL.9014924	0.924944	0.152643
hsa-miR-637	YBX1	YB.1_pS102.R.V_GBL.9014934	0.888662	0.206244
hsa-miR-647	AKT3	Akt_pS473.R.V_GBL.9014825	0.68938	0.0259709
hsa-miR-647	CCNE1	Cyclin_E1.M.V_GBL.9014986	0.991255	0.400817
hsa-miR-647	CDH1	E.Cadherin.R.V_GBL.9014862	1.52701	0.00987384
hsa-miR-647	CTNNB1	beta.Catenin.R.V_GBL.9014836	1.14242	0.0440759
hsa-miR-647	DVL3	Dvl3.R.V_GBL.9014861	0.822777	0.0842672
hsa-miR-647	ESR1	ER.alpha.R.V_GBL.9014870	0.78074	0.234234
hsa-miR-647	FN1	Fibronectin.R.C_GBL.9014872	0.673958	0.0234502
hsa-miR-647	GSK3B	GSK3.alpha.beta.M.V_GBL.9014954	1.16638	0.00632366
hsa-miR-647	KIT	c.Kit.R.V_GBL.9014850	0.961683	0.457639
hsa-miR-647	MET	c.Met_pY1235.R.C_GBL.9014852	0.968701	0.147531
hsa-miR-647	PIK3R1	PI3K.p85.R.V_GBL.9014913	0.971285	0.204599
hsa-miR-647	PRKAA1	AMPK.alpha.R.C_GBL.9014828	0.953602	0.345345
hsa-miR-647	WWTR1	TAZ_pS89.R.C_GBL.9014930	0.96068	0.30232
hsa-miR-653	CDH2	N.Cadherin.R.V_GBL.9014893	1.16648	0.014735
hsa-miR-653	IGF1R	IGF.1R.beta.R.C_GBL.9014883	0.796107	0.000293032
hsa-miR-653	MAPT	Tau.M.C_GBL.9014968	1.15782	0.0319884
hsa-miR-653	PTEN	PTEN.R.V_GBL.9014918	0.789976	0.0208862
hsa-miR-653	RPS6KB1	p70S6K.R.V_GBL.9014906	0.952055	0.264667
hsa-miR-653	TP53BP1	X53BP1.R.C_GBL.9014822	0.912307	0.136685
hsa-miR-653	YAP1	YAP_pS127.R.C_GBL.9014935	0.961838	0.302664
hsa-miR-653	YBX1	YB.1_pS102.R.V_GBL.9014934	0.768939	0.0717119
hsa-miR-653	YWHAE	X14.3.3_epsilon.M.C_GBL.9014939	0.945115	0.17237
hsa-miR-654-3p	AKT3	Akt_pS473.R.V_GBL.9014825	0.389726	0.00431368
hsa-miR-654-3p	BCL2L11	Bim.R.V_GBL.9014838	1.1732	0.0167292
hsa-miR-654-3p	MAP2K1	MEK1_pS217_S221.R.V_GBL.9014889	0.8508	0.000600314
hsa-miR-654-3p	MRE11A	Mre11.R.C_GBL.9014891	1.05962	0.0889829
hsa-miR-654-3p	PEA15	Pea.15.R.V_GBL.9014911	0.973186	0.390165
hsa-miR-654-3p	PIK3CA	PI3K.p110.alpha.R.C_GBL.9014912	1.24202	0.0191326
hsa-miR-654-5p	ACACB	ACC_pS79.R.V_GBL.9014843	0.751	0.0209846
hsa-miR-654-5p	AKT3	Akt_pS473.R.V_GBL.9014825	0.475169	0.00657662
hsa-miR-654-5p	BCL2L1	Bcl.X.R.V_GBL.9014835	0.831369	0.0171874
hsa-miR-654-5p	CHEK1	Chk1.R.C_GBL.9014846	0.907618	0.0229599
hsa-miR-654-5p	EIF4E	eIF4E.R.V_GBL.9014868	1.02312	0.402514
hsa-miR-654-5p	GAB2	GAB2.R.V_GBL.9014875	0.73238	0.000770081
hsa-miR-654-5p	IRS1	IRS1.R.V_GBL.9014885	0.70163	0.000316006
hsa-miR-654-5p	PEA15	Pea.15.R.V_GBL.9014911	0.989785	0.457428
hsa-miR-654-5p	SMAD3	Smad3.R.V_GBL.9014924	0.880436	0.0720988
hsa-miR-658	AKT1S1	PRAS40_pT246.R.V_GBL.9014915	1.02881	0.353171
hsa-miR-658	EEF2K	eEF2K.R.V_GBL.9014863	0.933104	0.0974033
hsa-miR-658	MAPK3	MAPK_pT202_Y204.R.V_GBL.9014888	0.874428	0.00723547
hsa-miR-658	PTK2	FAK.R.C_GBL.9014871	1.05297	0.0597226
hsa-miR-658	PXN	Paxillin.R.V_GBL.9014908	1.0919	0.0888262
hsa-miR-658	VASP	VASP.R.C_GBL.9014877	1.00236	0.486581
hsa-miR-658	YWHAE	X14.3.3_epsilon.M.C_GBL.9014939	1.05373	0.176716
hsa-miR-665	AKT3	Akt_pS473.R.V_GBL.9014825	0.59956	0.0136523
hsa-miR-665	BCL2L11	Bim.R.V_GBL.9014838	1.21684	0.00923652
hsa-miR-665	CDH1	E.Cadherin.R.V_GBL.9014862	1.66907	0.0051194
hsa-miR-665	CHEK1	Chk1_pS345.R.C_GBL.9014845	1.01769	0.394118
hsa-miR-665	EEF2K	eEF2K.R.V_GBL.9014863	0.625416	0.00130986
hsa-miR-665	ERBB3	HER3_pY1298.R.C_GBL.9014880	1.25859	0.00450359
hsa-miR-665	KDR	VEGFR2.R.V_GBL.9014932	0.937684	0.319339
hsa-miR-665	MAP2K1	MEK1_pS217_S221.R.V_GBL.9014889	0.865389	0.000812963
hsa-miR-665	MAPK9	JNK2.R.C_GBL.9014886	0.828701	0.1504
hsa-miR-665	MET	c.Met_pY1235.R.C_GBL.9014852	0.754869	0.00109245
hsa-miR-665	RAF1	C.Raf.R.V_GBL.9014857	0.769112	0.0312814
hsa-miR-665	SNAI2	Snail.M.C_GBL.9014965	1.74024	0.0202634
hsa-miR-665	SRC	Src_pY527.R.V_GBL.9014926	0.573027	0.0315163
hsa-miR-665	STAT3	STAT3_pY705.R.V_GBL.9014927	1.18578	0.0243017
hsa-miR-665	STAT5A	STAT5.ALPHA.R.V_GBL.9014928	0.863676	0.0028958
hsa-miR-665	VASP	VASP.R.C_GBL.9014877	1.06356	0.198709
hsa-miR-665	YAP1	YAP_pS127.R.C_GBL.9014935	1.0902	0.133495
hsa-miR-675-5p	CCNB1	Cyclin.B1.R.V_GBL.9014858	0.762238	0.00751108
hsa-miR-675-5p	KIT	c.Kit.R.V_GBL.9014850	0.877723	0.368356
hsa-miR-675-5p	MAPK1	MAPK_pT202_Y204.R.V_GBL.9014888	0.89929	0.013115
hsa-miR-744-5p	JUN	c.Jun_pS73.R.C_GBL.9014849	1.03766	0.260763
hsa-miR-744-5p	SMAD3	Smad3.R.V_GBL.9014924	0.826345	0.0324625
hsa-miR-744-5p	YWHAE	X14.3.3_epsilon.M.C_GBL.9014939	0.978052	0.342462
hsa-miR-7-5p	BCL2L1	Bcl.xL.R.V_GBL.9014834	0.884617	0.126685
hsa-miR-7-5p	CLDN7	Claudin.7.R.V_GBL.9014851	1.00816	0.427537
hsa-miR-7-5p	EGFR	EGFR.R.C_GBL.9014867	0.912632	0.163772
hsa-miR-7-5p	EIF4E	eIF4E.R.V_GBL.9014868	1.09966	0.16467
hsa-miR-7-5p	GSK3B	GSK3alpha.beta_pS21_S9.R.V_GBL.9014876	0.992607	0.449543
hsa-miR-7-5p	IGF1R	IGF.1R.beta.R.C_GBL.9014883	1.08636	0.00360899
hsa-miR-7-5p	IRS1	IRS1.R.V_GBL.9014885	0.769642	0.000679469
hsa-miR-7-5p	MAPK14	p38_MAPK.R.C_GBL.9014902	1.04955	0.29284
hsa-miR-7-5p	MAPK3	MAPK_pT202_Y204.R.V_GBL.9014888	0.9307	0.0333109
hsa-miR-7-5p	NCOA3	AIB1.M.V_GBL.9014940	1.05394	0.136281
hsa-miR-7-5p	NF2	NF2.R.C_GBL.9014894	0.986873	0.361078
hsa-miR-7-5p	NOTCH3	Notch3.R.C_GBL.9014897	0.849167	0.132198
hsa-miR-7-5p	PARP1	PARP_cleaved.M.C_GBL.9014960	0.94268	0.0804794
hsa-miR-7-5p	PGR	PR.R.V_GBL.9014916	1.73503	0.0690829
[truncated: 176 more rows]

## Sheet: Step II (Gene)
Gene Symbol	Antibody	Num Pred MiR	Mock Average	Pred MiR Average	Fold Change (Pred MiR/Mock)	S.E.M.	Pval (one-tail)
ACACA	ACC_pS79.R.V_GBL.9014843	7	0.23105	0.25096	1.08618	0.07355	0.210784
ACACA	ACC1.R.C_GBL.9014824	7	1.53394	1.47479	0.96144	0.04802	0.286806
AKT1	Akt.R.V_GBL.9014827	1	0.74336	0.74106	0.99691	0	0.475089
AKT1	Akt_pS473.R.V_GBL.9014825	1	0.03431	0.01369	0.39895	0	0.00450307
AKT1	Akt_pT308.R.V_GBL.9014971	1	0.07526	0.07499	0.99639	0	0.496817
AKT1S1	PRAS40_pT246.R.V_GBL.9014915	2	0.20553	0.21484	1.04531	0.12203	0.317053
AKT2	Akt.R.V_GBL.9014827	2	0.74336	0.7327	0.98567	0.1418	0.441893
AKT2	Akt_pS473.R.V_GBL.9014825	2	0.03431	0.02885	0.84084	0.18416	0.14548
AKT2	Akt_pT308.R.V_GBL.9014971	2	0.07526	0.05712	0.75889	0.017	0.218796
AKT3	Akt.R.V_GBL.9014827	43	0.74336	0.73345	0.98668	0.01606	0.402177
AKT3	Akt_pS473.R.V_GBL.9014825	43	0.03431	0.02164	0.63071	0.03201	0.000594165
AKT3	Akt_pT308.R.V_GBL.9014971	43	0.07526	0.08171	1.08567	0.04742	0.302969
AR	AR.R.V_GBL.9014831	4	0.01777	0.01802	1.01426	0.07379	0.430013
BAK1	Bak.R.C_GBL.9014832	5	0.19321	0.17293	0.89506	0.03101	0.0165978
BAX	Bax.R.V_GBL.9014833	2	0.44424	0.39104	0.88025	0.15959	0.146899
BCL2	Bcl.2.M.V_GBL.9014998	9	0.03273	0.03161	0.9657	0.07275	0.388531
BCL2L1	Bcl.X.R.V_GBL.9014835	6	0.33049	0.2889	0.87416	0.00637	5.65411e-05
BCL2L1	Bcl.xL.R.V_GBL.9014834	6	0.19372	0.17048	0.88004	0.0234	0.00971184
BCL2L11	Bim.R.V_GBL.9014838	30	0.10071	0.11986	1.19018	0.02844	0.0111824
BECN1	Beclin.G.V_GBL.9014969	17	0.09758	0.09321	0.95521	0.03047	0.25189
BIRC2	cIAP.R.V_GBL.9014848	1	0.28518	0.2122	0.74411	0	0.0025345
CASP3	Caspase.3_active.R.C_GBL.9014991	3	0.0091	0.01038	1.13998	0.06925	0.0687352
CASP7	Caspase.7_cleavedD198.R.C_GBL.9014840	9	0.00845	0.00686	0.81229	0.0284	0.00510195
CASP7	Caspase.7_cleavedD198.R.C_GBL.9014992	9	0.00583	0.00806	1.3815	0.09244	0.0111922
CASP8	Caspase.8.M.C_GBL.9014945	1	0.23636	0.18774	0.79429	0	0.0122367
CAV1	Caveolin.1.R.V_GBL.9014842	9	2.30755	1.95255	0.84616	0.12072	0.215208
CCNB1	Cyclin.B1.R.V_GBL.9014858	2	0.78109	0.43868	0.56162	0.20062	0.0129596
CCND1	Cyclin.D1.R.V_GBL.9014859	22	0.18727	0.16497	0.88091	0.01745	0.00613112
CCNE1	Cyclin_E1.M.V_GBL.9014950	7	0.10333	0.09565	0.92571	0.06258	0.205479
CCNE1	Cyclin_E1.M.V_GBL.9014986	7	0.10068	0.09565	0.94999	0.04919	0.238506
CDH2	N.Cadherin.R.V_GBL.9014893	29	0.0674	0.06788	1.00706	0.01528	0.43405
CDH3	P.Cadherin.R.C_GBL.9014909	3	0.21789	0.21668	0.99445	0.05327	0.469117
CDK1	CDK1.R.V_GBL.9014844	3	0.27518	0.2655	0.96485	0.10032	0.377033
CDK1	CDK1.R.V_GBL.9014947	3	0.14366	0.13565	0.94422	0.0429	0.122455
CDKN1A	p21.R.C_GBL.9014898	10	0.23993	0.21687	0.90388	0.03349	0.0566424
CDKN1B	p27.R.V_GBL.9014937	21	0.0826	0.08269	1.00104	0.04473	0.496115
CDKN1B	p27.R.V_GBL.9014980	21	0.00575	0.00647	1.12645	0.05417	0.165149
CDKN1B	p27.R.V_GBL.9014994	21	0.0553	0.06316	1.14203	0.05626	0.146061
CDKN1B	p27_pT157.R.C_GBL.9014899	21	2.71582e+08	2.56827e+08	0.94567	0.05	0.323524
CDKN1B	p27_pT198.R.V_GBL.9014900	21	0.15863	0.16619	1.04767	0.02651	0.239673
CHEK1	Chk1.R.C_GBL.9014846	4	0.2641	0.2566	0.9716	0.03712	0.24792
CHEK1	Chk1.R.C_GBL.9014975	4	0.06794	0.06567	0.96662	0.06338	0.403895
CHEK1	Chk1_pS345.R.C_GBL.9014845	4	0.13569	0.12607	0.92904	0.01474	0.0301253
CLDN7	Claudin.7.R.V_GBL.9014851	1	0.03554	0.03583	1.00816	0	0.427537
COL6A1	Collagen.VI.R.V_GBL.9014978	1	0.0404	0.0372	0.92079	0	0.0915117
CTNNA1	alpha.Catenin.M.V_GBL.9014941	10	0.32942	0.2325	0.70576	0.00856	0.0338738
CTNNA1	alpha.Catenin.M.V_GBL.9014983	10	0.19028	0.18254	0.95935	0.01637	0.138162
CTNNB1	beta.Catenin.R.V_GBL.9014836	22	0.72585	0.67594	0.93123	0.02535	0.136344
DVL3	Dvl3.R.V_GBL.9014861	8	0.13826	0.12959	0.93728	0.03269	0.143509
EEF2K	eEF2K.R.V_GBL.9014863	2	0.114	0.08074	0.70819	0.00992	0.000228068
EGFR	EGFR.R.C_GBL.9014867	3	0.12671	0.10965	0.86535	0.02558	0.0152149
EGFR	EGFR_pY1068.R.V_GBL.9014878	3	0.06641	0.06848	1.03125	0.08669	0.376953
EGFR	EGFR_pY1173.R.C_GBL.9014865	3	0.06751	0.06542	0.96901	0.05385	0.303447
EIF4E	eIF4E.R.V_GBL.9014868	8	0.56513	0.55307	0.97866	0.0355	0.359161
EIF4EBP1	X4E.BP1.R.V_GBL.9014821	3	0.30792	0.26196	0.85073	0.08708	0.0576853
EIF4EBP1	X4E.BP1_pS65.R.V_GBL.9014938	3	0.10452	0.10135	0.96971	0.03339	0.202767
EIF4EBP1	X4EBP1_pT37.R.V_GBL.9014820	3	0.3788	0.31054	0.8198	0.06794	0.0168895
ERBB3	HER3.R.V_GBL.9014881	15	0.04516	0.04844	1.07261	0.09007	0.344818
ERBB3	HER3_pY1298.R.C_GBL.9014880	15	0.0639	0.06573	1.02869	0.04336	0.371711
ERRFI1	MIG.6.M.V_GBL.9014957	16	0.04674	0.04426	0.94689	0.03362	0.225627
ERRFI1	MIG.6.M.V_GBL.9014987	16	0.85056	0.82055	0.96472	0.03505	0.316757
ESR1	ER.alpha.R.V_GBL.9014870	28	0.00204	0.002	0.98055	0.05903	0.453006
ESR1	ER.alpha_pS118.R.V_GBL.9014869	28	0.28474	0.28496	1.00079	0.01103	0.4895
FN1	Fibronectin.R.C_GBL.9014872	13	0.56659	0.55676	0.98264	0.07426	0.451079
FOXO3	FOXO3a.R.C_GBL.9014874	17	0.05465	0.04719	0.86344	0.02402	0.00952442
FOXO3	FOXO3A_pS318_S321.R.C_GBL.9014873	17	0.26123	0.23601	0.90347	0.01491	0.00802181
GAB2	GAB2.R.V_GBL.9014875	3	0.36723	0.20156	0.54888	0.01411	7.81109e-07
GATA3	GATA3.M.V_GBL.9014953	14	0.1104	0.10767	0.97526	0.02717	0.321869
GSK3A	GSK3.alpha.beta.M.V_GBL.9014954	7	0.63645	0.63178	0.99266	0.02002	0.402631
GSK3A	GSK3alpha.beta_pS21_S9.R.V_GBL.9014876	7	0.43924	0.41585	0.94675	0.03511	0.160059
GSK3B	GSK3.alpha.beta.M.V_GBL.9014954	41	0.63645	0.59156	0.92947	0.0165	0.0973046
GSK3B	GSK3alpha.beta_pS21_S9.R.V_GBL.9014876	41	0.43924	0.40844	0.92988	0.01999	0.143365
IGF1R	IGF.1R.beta.R.C_GBL.9014883	16	0.21396	0.20949	0.97911	0.02957	0.366756
IGFBP2	IGFBP2.R.V_GBL.9014884	1	0.02146	0.02027	0.94457	0	0.31081
INPP4B	INPP4B.G.C_GBL.9014970	1	0.10758	0.10205	0.94858	0	0.178095
IRS1	IRS1.R.V_GBL.9014885	19	0.2258	0.19777	0.87585	0.04738	0.125669
JUN	c.Jun_pS73.R.C_GBL.9014849	8	0.11285	0.13405	1.18782	0.07495	0.0588694
KDR	VEGFR2.R.V_GBL.9014932	5	1.90361	2.07397	1.0895	0.05462	0.143794
KIT	c.Kit.R.V_GBL.9014850	21	0.00332	0.00326	0.98196	0.05296	0.448049
LCK	Lck.R.V_GBL.9014887	1	0.06512	0.06745	1.03582	0	0.251936
MAP2K1	MEK1.R.V_GBL.9014890	14	0.62277	0.53926	0.86591	0.03672	0.038148
MAP2K1	MEK1_pS217_S221.R.V_GBL.9014889	14	0.87252	0.92882	1.06452	0.02958	0.135664
MAPK1	MAPK_pT202_Y204.R.V_GBL.9014888	14	0.1941	0.1765	0.90929	0.03649	0.106643
MAPK14	p38_MAPK.R.C_GBL.9014902	12	0.90519	0.75604	0.83523	0.0474	0.0383994
MAPK14	p38_pT180_Y182.R.V_GBL.9014903	12	0.25298	0.22458	0.88774	0.07052	0.193971
MAPK3	MAPK_pT202_Y204.R.V_GBL.9014888	7	0.1941	0.16837	0.86743	0.04685	0.0339875
MAPK9	JNK2.R.C_GBL.9014886	11	0.12588	0.11797	0.93711	0.02936	0.159214
MAPT	Tau.M.C_GBL.9014968	2	0.08797	0.11206	1.27392	0.1161	0.0133865
MET	c.Met.M.C_GBL.9014985	27	0.09452	0.09511	1.00619	0.02448	0.462341
MET	c.Met_pY1235.R.C_GBL.9014852	27	0.14919	0.13925	0.93333	0.03829	0.257194
MSH2	MSH2.M.C_GBL.9014958	1	0.17593	0.16329	0.92815	0	0.17213
MSH6	MSH6.R.C_GBL.9014892	2	0.85871	0.81021	0.94352	0.02196	0.0546535
MYC	c.Myc.R.C_GBL.9014853	8	0.32699	0.28944	0.88516	0.04387	0.051114
NCOA3	AIB1.M.V_GBL.9014940	21	0.30015	0.29727	0.9904	0.03226	0.449974
NF2	NF2.R.C_GBL.9014894	2	0.09306	0.08496	0.91293	0.00997	0.010167
NFKB1	NF.kB.p65_pS536.R.C_GBL.9014895	1	0.28364	0.2305	0.81267	0	0.00987039
NOTCH1	Notch1.R.V_GBL.9014896	7	0.17711	0.19891	1.12307	0.15394	0.285259
NOTCH3	Notch3.R.C_GBL.9014897	9	0.09813	0.08847	0.90149	0.02881	0.0477252
PARP1	PARP_cleaved.M.C_GBL.9014960	2	0.05038	0.0482	0.95682	0.01414	0.0636087
PCNA	PCNA.M.V_GBL.9014961	1	0.62199	0.5342	0.85886	0	0.159178
PDK1	PDK1_pS241.R.V_GBL.9014910	2	0.14398	0.14778	1.02637	0.09858	0.376983
PEA15	Pea.15.R.V_GBL.9014911	12	0.19663	0.19784	1.00617	0.02478	0.450467
PECAM1	CD31.M.V_GBL.9014946	6	0.05646	0.05728	1.01464	0.01581	0.266031
PGR	PR.R.V_GBL.9014916	2	0.00207	0.00291	1.41023	0.33975	0.13569
PIK3CA	PI3K.p110.alpha.R.C_GBL.9014912	16	0.2149	0.18636	0.86719	0.02303	0.00718925
PIK3R1	PI3K.p85.R.V_GBL.9014913	23	0.85078	0.83253	0.97854	0.02141	0.342939
PRKAA1	AMPK.alpha.R.C_GBL.9014828	14	0.38969	0.34854	0.89442	0.02744	0.0422212
PRKAA1	AMPK_pT172.R.V_GBL.9014829	14	1.11152	1.04623	0.94127	0.04133	0.234703
PRKCA	PKC.alpha.M.V_GBL.9014962	3	0.61868	0.565	0.91324	0.0612	0.097373
PRKCA	PKC.alpha_pS657.R.V_GBL.9014914	3	0.37125	0.34682	0.9342	0.05389	0.11307
PTCH1	PTCH.R.C_GBL.9014917	12	0.42442	0.42969	1.01242	0.03918	0.430804
PTEN	PTEN.R.V_GBL.9014918	53	0.97215	1.05041	1.0805	0.02474	0.190253
PTGS2	COX.2.R.C_GBL.9014979	4	0.1013	0.11039	1.08982	0.15346	0.294711
PTK2	FAK.pY397_GBL.9014963	20	0.1107	0.1135	1.0253	0.03142	0.363927
PTK2	FAK.R.C_GBL.9014871	20	0.70057	0.65725	0.93816	0.02804	0.172137
PXN	Paxillin.R.V_GBL.9014908	2	0.79067	0.68192	0.86246	0.15686	0.124953
RAB25	Rab25.R.C_GBL.9014919	1	0.05113	0.04995	0.97686	0	0.390541
RAD51	Rad51.M.C_GBL.9014959	1	0.05898	0.0646	1.09532	0	0.255986
RAD51	Rad51.M.C_GBL.9014988	1	0.0343	0.04029	1.1745	0	0.158395
RAF1	C.Raf.R.V_GBL.9014857	7	0.39504	0.319	0.80751	0.06535	0.0331678
RAF1	C.Raf_pS338.R.C_GBL.9014856	7	0.14632	0.12629	0.8631	0.03235	0.0363011
RB1	Rb.M.V_GBL.9014952	24	0.16017	0.14834	0.92615	0.01281	0.0192528
RB1	Rb_pS807_S811.R.V_GBL.9014920	24	0.98107	0.83832	0.85449	0.02306	0.00967245
RPS6KA1	p90RSK_pT359_S363.R.C_GBL.9014907	8	0.25779	0.22381	0.86817	0.03842	0.0242315
RPS6KB1	p70S6K.R.V_GBL.9014906	39	0.36422	0.3247	0.89148	0.0288	0.12078
RPS6KB1	p70S6K_pT389.R.V_GBL.9014905	39	0.43416	0.40091	0.92341	0.0309	0.21848
SMAD1	Smad1.R.V_GBL.9014923	22	0.2635	0.22813	0.86578	0.01107	6.5736e-05
SMAD3	Smad3.R.V_GBL.9014924	4	0.2406	0.20801	0.86452	0.01863	0.00315175
SMAD4	Smad4.M.V_GBL.9014964	16	0.16425	0.15873	0.96636	0.0103	0.0801831
SNAI2	Snail.M.C_GBL.9014965	17	0.03156	0.03869	1.22575	0.04883	0.0280942
SRC	Src.M.V_GBL.9014966	10	0.05392	0.05379	0.9975	0.05765	0.489872
SRC	Src_pY416.R.C_GBL.9014925	10	0.1324	0.12074	0.91193	0.04175	0.115105
SRC	Src_pY527.R.V_GBL.9014926	10	0.61565	0.53612	0.87082	0.05167	0.0936916
STAT3	STAT3_pY705.R.V_GBL.9014927	12	0.10155	0.10648	1.04852	0.01939	0.105657
STMN1	Stathmin.R.V_GBL.9014929	7	0.06513	0.06359	0.97632	0.06335	0.395854
TP53	p53.R.V_GBL.9014904	3	0.0832	0.09101	1.09381	0.0286	0.291528
TP53BP1	X53BP1.R.C_GBL.9014822	7	0.72972	0.75025	1.02813	0.05018	0.35094
VASP	VASP.R.C_GBL.9014877	12	0.16371	0.16261	0.99328	0.03568	0.459652
WWTR1	TAZ_pS89.R.C_GBL.9014930	14	0.06393	0.06021	0.94186	0.02375	0.120863
XIAP	XIAP.R.C_GBL.9014933	6	0.1937	0.16049	0.82857	0.03232	0.00271509
YAP1	YAP.R.V_GBL.9014936	10	0.12237	0.12782	1.04453	0.04461	0.279546
YAP1	YAP_pS127.R.C_GBL.9014935	10	0.16893	0.16499	0.9767	0.02288	0.290244
YBX1	YB.1_pS102.R.V_GBL.9014934	16	0.33866	0.33539	0.99034	0.05507	0.466984
YWHAE	X14.3.3_epsilon.M.C_GBL.9014939	26	0.10544	0.10251	0.97221	0.01734	0.27324

## Sheet: Step II (Interaction)
MiRNA	Gene Symbol	Antibody	Fold Change	Pval (one-tail)
hsa-let-7a-3p	BCL2L11	Bim.R.V_GBL.9014838	1.05596	0.157003
hsa-let-7a-3p	CDKN1B	p27.R.V_GBL.9014937	0.990554	0.46531
hsa-let-7a-3p	CTNNB1	beta.Catenin.R.V_GBL.9014836	1.02202	0.362763
hsa-let-7a-3p	GATA3	GATA3.M.V_GBL.9014953	0.798667	0.00481257
hsa-let-7a-3p	GSK3B	GSK3alpha.beta_pS21_S9.R.V_GBL.9014876	0.711891	0.00631247
hsa-let-7a-3p	IGF1R	IGF.1R.beta.R.C_GBL.9014883	0.980956	0.12203
hsa-let-7a-3p	IRS1	IRS1.R.V_GBL.9014885	0.733014	0.000439348
hsa-let-7a-3p	MAPK1	MAPK_pT202_Y204.R.V_GBL.9014888	0.992086	0.384195
hsa-let-7a-3p	MET	c.Met_pY1235.R.C_GBL.9014852	0.777971	0.00145878
hsa-let-7a-3p	NOTCH3	Notch3.R.C_GBL.9014897	0.91875	0.257098
hsa-let-7a-3p	PRKAA1	AMPK.alpha.R.C_GBL.9014828	0.992302	0.473291
hsa-let-7a-3p	PTCH1	PTCH.R.C_GBL.9014917	0.896708	0.0283564
hsa-let-7a-3p	RPS6KA1	p90RSK_pT359_S363.R.C_GBL.9014907	0.917399	0.136816
hsa-let-7a-3p	RPS6KB1	p70S6K_pT389.R.V_GBL.9014905	0.958474	0.0483927
hsa-let-7a-3p	SMAD4	Smad4.M.V_GBL.9014964	0.897273	0.0543604
hsa-let-7a-3p	SNAI2	Snail.M.C_GBL.9014965	1.41307	0.0743733
hsa-let-7a-3p	TP53BP1	X53BP1.R.C_GBL.9014822	1.06032	0.212672
hsa-let-7a-3p	WWTR1	TAZ_pS89.R.C_GBL.9014930	0.836932	0.0483187
hsa-let-7a-5p	BCL2L1	Bcl.xL.R.V_GBL.9014834	0.824927	0.0609716
hsa-let-7a-5p	CASP3	Caspase.3_active.R.C_GBL.9014991	1.00361	0.486997
hsa-let-7a-5p	CCND1	Cyclin.D1.R.V_GBL.9014859	0.892567	0.142043
hsa-let-7a-5p	DVL3	Dvl3.R.V_GBL.9014861	0.944266	0.304823
hsa-let-7a-5p	EEF2K	eEF2K.R.V_GBL.9014863	0.718105	0.00298127
hsa-let-7a-5p	IGF1R	IGF.1R.beta.R.C_GBL.9014883	0.843958	0.000646924
hsa-let-7a-5p	MAPK9	JNK2.R.C_GBL.9014886	0.842756	0.16765
hsa-let-7a-5p	MYC	c.Myc.R.C_GBL.9014853	0.847756	0.00216715
hsa-let-7a-5p	PTEN	PTEN.R.V_GBL.9014918	1.28765	0.00917816
hsa-let-7a-5p	RB1	Rb_pS807_S811.R.V_GBL.9014920	0.924216	0.164086
hsa-let-7a-5p	STAT3	STAT3_pY705.R.V_GBL.9014927	1.02825	0.329004
hsa-let-7a-5p	TP53	p53.R.V_GBL.9014904	1.08051	0.402566
hsa-let-7d-5p	BCL2L1	Bcl.X.R.V_GBL.9014835	0.877974	0.0377014
hsa-let-7d-5p	CASP3	Caspase.3_active.R.C_GBL.9014991	1.18724	0.0820185
hsa-let-7d-5p	CCND1	Cyclin.D1.R.V_GBL.9014859	0.806991	0.0507129
hsa-let-7d-5p	DVL3	Dvl3.R.V_GBL.9014861	0.896197	0.183803
hsa-let-7d-5p	EEF2K	eEF2K.R.V_GBL.9014863	0.698267	0.00245265
hsa-let-7d-5p	IGF1R	IGF.1R.beta.R.C_GBL.9014883	0.830984	0.000510987
hsa-let-7d-5p	MAPK9	JNK2.R.C_GBL.9014886	1.03568	0.405914
hsa-let-7d-5p	PTEN	PTEN.R.V_GBL.9014918	1.26063	0.011958
hsa-let-7d-5p	RB1	Rb_pS807_S811.R.V_GBL.9014920	0.935303	0.196598
hsa-let-7d-5p	TP53	p53.R.V_GBL.9014904	1.05229	0.436134
hsa-let-7g-3p	CCNB1	Cyclin.B1.R.V_GBL.9014858	0.360995	0.000433951
hsa-let-7g-3p	EIF4E	eIF4E.R.V_GBL.9014868	0.930436	0.238366
hsa-let-7g-3p	GATA3	GATA3.M.V_GBL.9014953	0.841263	0.00927928
hsa-let-7g-3p	PTEN	PTEN.R.V_GBL.9014918	1.14216	0.0517117
hsa-let-7g-3p	PTK2	FAK.pY397_GBL.9014963	0.653787	0.00110424
hsa-let-7g-3p	RB1	Rb_pS807_S811.R.V_GBL.9014920	0.517332	0.00253142
hsa-let-7g-3p	YWHAE	X14.3.3_epsilon.M.C_GBL.9014939	0.845372	0.0255942
hsa-let-7g-5p	BCL2L1	Bcl.xL.R.V_GBL.9014834	0.860972	0.0939617
hsa-let-7g-5p	CASP3	Caspase.3_active.R.C_GBL.9014991	1.22909	0.0552895
hsa-let-7g-5p	CCND1	Cyclin.D1.R.V_GBL.9014859	0.901289	0.158868
hsa-let-7g-5p	DVL3	Dvl3.R.V_GBL.9014861	1.00048	0.498197
hsa-let-7g-5p	IGF1R	IGF.1R.beta.R.C_GBL.9014883	0.85443	0.000793849
hsa-let-7g-5p	RB1	Rb.M.V_GBL.9014952	0.864728	0.0745077
hsa-let-7g-5p	TP53	p53.R.V_GBL.9014904	1.14864	0.326585
hsa-miR-101-3p	BCL2L11	Bim.R.V_GBL.9014838	1.06855	0.117924
hsa-miR-101-3p	FN1	Fibronectin.R.C_GBL.9014872	1.37075	0.0169694
hsa-miR-101-3p	GATA3	GATA3.M.V_GBL.9014953	1.15577	0.0097642
hsa-miR-101-3p	GSK3B	GSK3.alpha.beta.M.V_GBL.9014954	0.828714	0.00583295
hsa-miR-101-3p	MAPK1	MAPK_pT202_Y204.R.V_GBL.9014888	0.872772	0.00697893
hsa-miR-101-3p	MET	c.Met_pY1235.R.C_GBL.9014852	0.739642	0.000915466
hsa-miR-101-3p	PRKAA1	AMPK.alpha.R.C_GBL.9014828	0.828879	0.102134
hsa-miR-101-3p	PTCH1	PTCH.R.C_GBL.9014917	0.849487	0.0108677
hsa-miR-101-3p	PTGS2	COX.2.R.C_GBL.9014979	0.953277	0.300696
hsa-miR-101-3p	SMAD1	Smad1.R.V_GBL.9014923	0.863994	0.0874106
hsa-miR-101-3p	STMN1	Stathmin.R.V_GBL.9014929	0.875377	0.0358893
hsa-miR-101-3p	WWTR1	TAZ_pS89.R.C_GBL.9014930	0.944361	0.237165
hsa-miR-101-5p	PTGS2	COX.2.R.C_GBL.9014979	1.5478	0.00321891
hsa-miR-101-5p	RPS6KB1	p70S6K.R.V_GBL.9014906	0.778598	0.0232993
hsa-miR-101-5p	SMAD3	Smad3.R.V_GBL.9014924	0.844531	0.0418026
hsa-miR-101-5p	SRC	Src_pY527.R.V_GBL.9014926	0.624742	0.0423536
hsa-miR-103a-3p	AKT3	Akt_pS473.R.V_GBL.9014825	0.667928	0.0220385
hsa-miR-103a-3p	BECN1	Beclin.G.V_GBL.9014969	0.85112	0.0693549
hsa-miR-103a-3p	CCNE1	Cyclin_E1.M.V_GBL.9014986	0.829853	0.00642806
hsa-miR-103a-3p	CDKN1B	p27_pT198.R.V_GBL.9014900	0.853226	0.179786
hsa-miR-103a-3p	CTNNA1	alpha.Catenin.M.V_GBL.9014941	0.674082	0.298046
hsa-miR-103a-3p	CTNNB1	beta.Catenin.R.V_GBL.9014836	1.04637	0.238074
hsa-miR-103a-3p	MAP2K1	MEK1.R.V_GBL.9014890	0.986957	0.382258
hsa-miR-103a-3p	PIK3R1	PI3K.p85.R.V_GBL.9014913	0.963258	0.154086
hsa-miR-103a-3p	PTEN	PTEN.R.V_GBL.9014918	1.12458	0.0676757
hsa-miR-103a-3p	RPS6KB1	p70S6K.R.V_GBL.9014906	1.00468	0.474589
hsa-miR-105-3p	SNAI2	Snail.M.C_GBL.9014965	1.10244	0.332234
hsa-miR-106a-5p	AKT3	Akt_pS473.R.V_GBL.9014825	0.709957	0.0306111
hsa-miR-106a-5p	BCL2L11	Bim.R.V_GBL.9014838	1.13363	0.0317183
hsa-miR-106a-5p	BECN1	Beclin.G.V_GBL.9014969	1.19792	0.0380105
hsa-miR-106a-5p	CASP7	Caspase.7_cleavedD198.R.C_GBL.9014840	0.688511	0.0647026
hsa-miR-106a-5p	CCND1	Cyclin.D1.R.V_GBL.9014859	0.958931	0.326525
hsa-miR-106a-5p	CDKN1A	p21.R.C_GBL.9014898	1.00186	0.487856
hsa-miR-106a-5p	ESR1	ER.alpha.R.V_GBL.9014870	0.56496	0.09951
hsa-miR-106a-5p	MAP2K1	MEK1.R.V_GBL.9014890	0.992681	0.432869
hsa-miR-106a-5p	MAPK1	MAPK_pT202_Y204.R.V_GBL.9014888	0.997853	0.467919
hsa-miR-106a-5p	NCOA3	AIB1.M.V_GBL.9014940	1.08523	0.062208
hsa-miR-106a-5p	PIK3R1	PI3K.p85.R.V_GBL.9014913	0.987621	0.353833
hsa-miR-106a-5p	PTEN	PTEN.R.V_GBL.9014918	1.18818	0.0273586
hsa-miR-106a-5p	PTK2	FAK.R.C_GBL.9014871	1.06461	0.0389575
hsa-miR-106a-5p	RB1	Rb_pS807_S811.R.V_GBL.9014920	0.923622	0.162501
hsa-miR-106a-5p	RPS6KA1	p90RSK_pT359_S363.R.C_GBL.9014907	0.986666	0.421496
hsa-miR-106a-5p	SMAD1	Smad1.R.V_GBL.9014923	0.846185	0.0695242
hsa-miR-106a-5p	SMAD4	Smad4.M.V_GBL.9014964	0.881297	0.0397111
hsa-miR-106a-5p	SRC	Src_pY416.R.C_GBL.9014925	0.811282	0.0288905
hsa-miR-106a-5p	STAT3	STAT3_pY705.R.V_GBL.9014927	1.02993	0.319935
hsa-miR-106a-5p	VASP	VASP.R.C_GBL.9014877	1.09742	0.11421
hsa-miR-106b-5p	AKT3	Akt_pT308.R.V_GBL.9014971	0.741538	0.289626
hsa-miR-106b-5p	BCL2L11	Bim.R.V_GBL.9014838	1.16003	0.0204522
hsa-miR-106b-5p	BECN1	Beclin.G.V_GBL.9014969	0.975312	0.380724
hsa-miR-106b-5p	CASP7	Caspase.7_cleavedD198.R.C_GBL.9014840	0.761214	0.10481
hsa-miR-106b-5p	CCND1	Cyclin.D1.R.V_GBL.9014859	1.0035	0.484416
hsa-miR-106b-5p	CDKN1A	p21.R.C_GBL.9014898	0.693085	0.00602643
hsa-miR-106b-5p	ESR1	ER.alpha_pS118.R.V_GBL.9014869	1.08432	0.0072191
hsa-miR-106b-5p	MAPK1	MAPK_pT202_Y204.R.V_GBL.9014888	0.958344	0.0941927
hsa-miR-106b-5p	NCOA3	AIB1.M.V_GBL.9014940	0.805391	0.00842964
hsa-miR-106b-5p	PIK3R1	PI3K.p85.R.V_GBL.9014913	1.01271	0.35025
hsa-miR-106b-5p	PTEN	PTEN.R.V_GBL.9014918	1.2327	0.0160917
hsa-miR-106b-5p	PTK2	FAK.R.C_GBL.9014871	0.985281	0.295229
hsa-miR-106b-5p	RB1	Rb.M.V_GBL.9014952	0.915261	0.156517
hsa-miR-106b-5p	RPS6KA1	p90RSK_pT359_S363.R.C_GBL.9014907	0.849753	0.0466032
hsa-miR-106b-5p	SMAD1	Smad1.R.V_GBL.9014923	0.771315	0.029379
hsa-miR-106b-5p	SMAD4	Smad4.M.V_GBL.9014964	0.9761	0.317561
hsa-miR-106b-5p	STAT3	STAT3_pY705.R.V_GBL.9014927	0.994524	0.465191
hsa-miR-106b-5p	VASP	VASP.R.C_GBL.9014877	1.20018	0.0266333
hsa-miR-107	AKT3	Akt_pS473.R.V_GBL.9014825	0.621958	0.0158604
hsa-miR-107	CCNE1	Cyclin_E1.M.V_GBL.9014950	0.662428	0.00297386
hsa-miR-107	CDKN1B	p27_pT198.R.V_GBL.9014900	0.850283	0.175705
hsa-miR-107	CTNNA1	alpha.Catenin.M.V_GBL.9014941	0.700847	0.3126
hsa-miR-107	MAP2K1	MEK1.R.V_GBL.9014890	1.02824	0.264451
hsa-miR-107	PIK3R1	PI3K.p85.R.V_GBL.9014913	0.993011	0.415416
hsa-miR-107	PTEN	PTEN.R.V_GBL.9014918	1.22	0.0185785
hsa-miR-107	RPS6KB1	p70S6K.R.V_GBL.9014906	0.9594	0.295232
hsa-miR-10b-3p	CTNNB1	beta.Catenin.R.V_GBL.9014836	1.02999	0.317865
hsa-miR-10b-3p	GSK3B	GSK3.alpha.beta.M.V_GBL.9014954	0.855216	0.00925724
hsa-miR-10b-3p	NOTCH3	Notch3.R.C_GBL.9014897	0.907569	0.231496
hsa-miR-10b-3p	PTCH1	PTCH.R.C_GBL.9014917	1.06602	0.0745244
hsa-miR-10b-3p	RB1	Rb_pS807_S811.R.V_GBL.9014920	0.835684	0.0428483
hsa-miR-10b-3p	WWTR1	TAZ_pS89.R.C_GBL.9014930	0.882619	0.0918445
hsa-miR-10b-3p	YWHAE	X14.3.3_epsilon.M.C_GBL.9014939	0.95582	0.217096
hsa-miR-1184	BECN1	Beclin.G.V_GBL.9014969	0.911801	0.160235
hsa-miR-1184	CTNNA1	alpha.Catenin.M.V_GBL.9014941	0.710648	0.31805
hsa-miR-1184	ERRFI1	MIG.6.M.V_GBL.9014957	0.949377	0.114917
hsa-miR-1184	YWHAE	X14.3.3_epsilon.M.C_GBL.9014939	0.966947	0.274367
hsa-miR-1185-5p	IRS1	IRS1.R.V_GBL.9014885	0.78746	0.000861173
hsa-miR-1185-5p	SMAD1	Smad1.R.V_GBL.9014923	1.00034	0.498376
hsa-miR-1185-5p	SRC	Src_pY416.R.C_GBL.9014925	1.0468	0.255587
hsa-miR-1225-3p	COL6A1	Collagen.VI.R.V_GBL.9014978	0.92079	0.0915117
hsa-miR-1225-3p	CTNNB1	beta.Catenin.R.V_GBL.9014836	0.841291	0.0345086
hsa-miR-124-3p	AKT1S1	PRAS40_pT246.R.V_GBL.9014915	0.923275	0.175117
hsa-miR-124-3p	AKT2	Akt_pS473.R.V_GBL.9014825	0.65668	0.0202773
hsa-miR-124-3p	AKT3	Akt_pS473.R.V_GBL.9014825	0.65668	0.0202773
hsa-miR-124-3p	AR	AR.R.V_GBL.9014831	1.05824	0.174726
hsa-miR-124-3p	BCL2L11	Bim.R.V_GBL.9014838	1.03879	0.232132
hsa-miR-124-3p	BECN1	Beclin.G.V_GBL.9014969	1.07056	0.206086
hsa-miR-124-3p	CDH2	N.Cadherin.R.V_GBL.9014893	1.05252	0.151956
hsa-miR-124-3p	ERBB3	HER3_pY1298.R.C_GBL.9014880	0.887763	0.0391226
hsa-miR-124-3p	MAPK14	p38_pT180_Y182.R.V_GBL.9014903	0.248641	0.000699831
hsa-miR-124-3p	PEA15	Pea.15.R.V_GBL.9014911	1.08612	0.199805
hsa-miR-124-3p	PIK3CA	PI3K.p110.alpha.R.C_GBL.9014912	0.929337	0.188462
hsa-miR-124-3p	RPS6KA1	p90RSK_pT359_S363.R.C_GBL.9014907	0.690403	0.00765296
hsa-miR-124-3p	RPS6KB1	p70S6K_pT389.R.V_GBL.9014905	0.765737	0.000441404
hsa-miR-124-3p	SMAD4	Smad4.M.V_GBL.9014964	1.03395	0.254508
hsa-miR-124-3p	SNAI2	Snail.M.C_GBL.9014965	1.20399	0.205115
hsa-miR-1245a	CAV1	Caveolin.1.R.V_GBL.9014842	0.476042	0.00780418
hsa-miR-1245a	GSK3B	GSK3.alpha.beta.M.V_GBL.9014954	0.66195	0.000824275
hsa-miR-1245a	SRC	Src_pY527.R.V_GBL.9014926	1.08166	0.309517
hsa-miR-125a-5p	AKT1S1	PRAS40_pT246.R.V_GBL.9014915	1.16734	0.0476112
hsa-miR-125a-5p	AKT3	Akt_pS473.R.V_GBL.9014825	0.606935	0.014333
hsa-miR-125a-5p	BAK1	Bak.R.C_GBL.9014832	0.996667	0.473863
hsa-miR-125a-5p	CTNNB1	beta.Catenin.R.V_GBL.9014836	0.940437	0.186771
hsa-miR-125a-5p	DVL3	Dvl3.R.V_GBL.9014861	1.12123	0.152217
hsa-miR-125a-5p	EIF4EBP1	X4EBP1_pT37.R.V_GBL.9014820	0.825872	0.0174469
hsa-miR-125a-5p	KIT	c.Kit.R.V_GBL.9014850	1.17386	0.318106
hsa-miR-125a-5p	MAPK14	p38_MAPK.R.C_GBL.9014902	0.87918	0.117201
hsa-miR-125b-2-3p	CDH2	N.Cadherin.R.V_GBL.9014893	0.940349	0.127259
hsa-miR-125b-2-3p	GSK3B	GSK3.alpha.beta.M.V_GBL.9014954	0.898732	0.0234233
hsa-miR-125b-2-3p	JUN	c.Jun_pS73.R.C_GBL.9014849	1.13849	0.0381051
hsa-miR-125b-2-3p	PTEN	PTEN.R.V_GBL.9014918	1.41624	0.00327539
hsa-miR-125b-2-3p	SNAI2	Snail.M.C_GBL.9014965	1.08421	0.359945
hsa-miR-126-3p	IRS1	IRS1.R.V_GBL.9014885	0.770663	0.000688428
hsa-miR-126-3p	MET	c.Met_pY1235.R.C_GBL.9014852	0.649181	0.000379595
hsa-miR-1285-3p	CAV1	Caveolin.1.R.V_GBL.9014842	0.423971	0.00600843
hsa-miR-1285-3p	JUN	c.Jun_pS73.R.C_GBL.9014849	1.39647	0.00234521
hsa-miR-1285-3p	MAPK3	MAPK_pT202_Y204.R.V_GBL.9014888	1.02107	0.227022
hsa-miR-1285-3p	PDK1	PDK1_pS241.R.V_GBL.9014910	1.12495	0.0969833
hsa-miR-1285-3p	PIK3R1	PI3K.p85.R.V_GBL.9014913	1.11184	0.0168216
hsa-miR-1285-3p	PTEN	PTEN.R.V_GBL.9014918	1.36066	0.0049145
hsa-miR-1285-3p	YAP1	YAP.R.V_GBL.9014936	0.890885	0.0878724
hsa-miR-1289	CTNNA1	alpha.Catenin.M.V_GBL.9014941	0.728462	0.328113
hsa-miR-129-5p	BECN1	Beclin.G.V_GBL.9014969	1.15719	0.0623016
hsa-miR-129-5p	CDH2	N.Cadherin.R.V_GBL.9014893	1.14856	0.0197338
hsa-miR-129-5p	ESR1	ER.alpha.R.V_GBL.9014870	0.511899	0.0812859
hsa-miR-129-5p	GSK3B	GSK3alpha.beta_pS21_S9.R.V_GBL.9014876	0.826037	0.0238518
hsa-miR-129-5p	MAPK1	MAPK_pT202_Y204.R.V_GBL.9014888	0.724828	0.000761713
hsa-miR-129-5p	PTCH1	PTCH.R.C_GBL.9014917	1.0782	0.0531204
hsa-miR-129-5p	RPS6KB1	p70S6K.R.V_GBL.9014906	0.371775	0.00131876
hsa-miR-129-5p	SNAI2	Snail.M.C_GBL.9014965	1.14469	0.273458
hsa-miR-129-5p	YBX1	YB.1_pS102.R.V_GBL.9014934	0.727376	0.0513282
hsa-miR-1299	NOTCH3	Notch3.R.C_GBL.9014897	1.09266	0.230998
hsa-miR-136-3p	AKT3	Akt_pS473.R.V_GBL.9014825	0.698055	0.027811
hsa-miR-136-3p	BCL2L1	Bcl.X.R.V_GBL.9014835	0.873476	0.034696
hsa-miR-136-3p	CCND1	Cyclin.D1.R.V_GBL.9014859	0.89416	0.144973
hsa-miR-136-3p	DVL3	Dvl3.R.V_GBL.9014861	0.910977	0.215505
hsa-miR-136-3p	GATA3	GATA3.M.V_GBL.9014953	0.959378	0.159032
hsa-miR-136-3p	GSK3B	GSK3alpha.beta_pS21_S9.R.V_GBL.9014876	0.970125	0.308158
hsa-miR-136-3p	MAPK9	JNK2.R.C_GBL.9014886	0.968072	0.415562
hsa-miR-136-5p	BCL2	Bcl.2.M.V_GBL.9014998	1.16584	0.1549
hsa-miR-136-5p	BECN1	Beclin.G.V_GBL.9014969	1.04531	0.29246
hsa-miR-136-5p	CAV1	Caveolin.1.R.V_GBL.9014842	1.13328	0.147539
hsa-miR-136-5p	CDH2	N.Cadherin.R.V_GBL.9014893	1.10268	0.0471095
hsa-miR-136-5p	FN1	Fibronectin.R.C_GBL.9014872	0.854606	0.120625
hsa-miR-136-5p	NOTCH3	Notch3.R.C_GBL.9014897	0.845352	0.12747
hsa-miR-136-5p	PIK3CA	PI3K.p110.alpha.R.C_GBL.9014912	0.924472	0.174748
hsa-miR-136-5p	PIK3R1	PI3K.p85.R.V_GBL.9014913	1.02647	0.221342
hsa-miR-136-5p	RAD51	Rad51.M.C_GBL.9014959	1.09532	0.255986
hsa-miR-145-5p	FN1	Fibronectin.R.C_GBL.9014872	1.58824	0.00487597
hsa-miR-145-5p	IRS1	IRS1.R.V_GBL.9014885	1.00047	0.49133
hsa-miR-145-5p	MAPK9	JNK2.R.C_GBL.9014886	0.910944	0.281455
hsa-miR-145-5p	NCOA3	AIB1.M.V_GBL.9014940	1.01639	0.355582
hsa-miR-145-5p	PTK2	FAK.R.C_GBL.9014871	0.736585	0.000861168
hsa-miR-145-5p	RPS6KB1	p70S6K.R.V_GBL.9014906	0.818053	0.0371619
hsa-miR-145-5p	SMAD1	Smad1.R.V_GBL.9014923	0.844775	0.0683007
hsa-miR-145-5p	SMAD3	Smad3.R.V_GBL.9014924	0.839658	0.039005
hsa-miR-145-5p	TP53BP1	X53BP1.R.C_GBL.9014822	1.11103	0.0944484
hsa-miR-146a-5p	CTNNB1	beta.Catenin.R.V_GBL.9014836	1.22105	0.0152499
hsa-miR-146a-5p	FN1	Fibronectin.R.C_GBL.9014872	1.19074	0.0759942
hsa-miR-146a-5p	IRS1	IRS1.R.V_GBL.9014885	0.969135	0.10824
hsa-miR-146a-5p	MAPT	Tau.M.C_GBL.9014968	1.39002	0.00287878
hsa-miR-146a-5p	SMAD4	Smad4.M.V_GBL.9014964	0.982979	0.366368
hsa-miR-146a-5p	YAP1	YAP_pS127.R.C_GBL.9014935	1.08939	0.135222
hsa-miR-148a-3p	BCL2L11	Bim.R.V_GBL.9014838	1.25093	0.00618824
hsa-miR-148a-3p	CDKN1B	p27.R.V_GBL.9014937	0.82467	0.0887363
hsa-miR-148a-3p	ERBB3	HER3.R.V_GBL.9014881	0.874051	0.0808692
hsa-miR-148a-3p	ERRFI1	MIG.6.M.V_GBL.9014957	0.887986	0.0224267
hsa-miR-148a-3p	ESR1	ER.alpha.R.V_GBL.9014870	0.537536	0.089566
hsa-miR-148a-3p	GSK3A	GSK3.alpha.beta.M.V_GBL.9014954	0.983396	0.314623
hsa-miR-148a-3p	IRS1	IRS1.R.V_GBL.9014885	0.80797	0.00115969
hsa-miR-148a-3p	KIT	c.Kit.R.V_GBL.9014850	1.08844	0.403451
hsa-miR-148a-3p	MET	c.Met_pY1235.R.C_GBL.9014852	0.845874	0.00416676
hsa-miR-148a-3p	PEA15	Pea.15.R.V_GBL.9014911	0.991006	0.462492
hsa-miR-148a-3p	PIK3CA	PI3K.p110.alpha.R.C_GBL.9014912	0.915983	0.153151
hsa-miR-148a-3p	PIK3R1	PI3K.p85.R.V_GBL.9014913	1.18703	0.0041646
hsa-miR-148a-3p	PRKAA1	AMPK_pT172.R.V_GBL.9014829	0.739187	0.00128979
hsa-miR-148a-3p	PTEN	PTEN.R.V_GBL.9014918	0.910433	0.120268
hsa-miR-148a-3p	RPS6KB1	p70S6K.R.V_GBL.9014906	1.00749	0.459371
hsa-miR-148b-3p	BCL2L11	Bim.R.V_GBL.9014838	1.4135	0.00148745
hsa-miR-148b-3p	CDKN1B	p27.R.V_GBL.9014937	0.738368	0.0395237
hsa-miR-148b-3p	ERBB3	HER3_pY1298.R.C_GBL.9014880	1.02267	0.315955
hsa-miR-148b-3p	ERRFI1	MIG.6.M.V_GBL.9014957	0.845942	0.00980283
hsa-miR-148b-3p	IRS1	IRS1.R.V_GBL.9014885	0.774661	0.000725043
hsa-miR-148b-3p	KIT	c.Kit.R.V_GBL.9014850	0.80508	0.298922
hsa-miR-148b-3p	MET	c.Met_pY1235.R.C_GBL.9014852	0.897305	0.0126954
hsa-miR-148b-3p	PEA15	Pea.15.R.V_GBL.9014911	0.868266	0.115506
hsa-miR-148b-3p	PIK3CA	PI3K.p110.alpha.R.C_GBL.9014912	0.807827	0.0335412
hsa-miR-148b-3p	PIK3R1	PI3K.p85.R.V_GBL.9014913	0.920482	0.0385001
hsa-miR-148b-3p	PRKAA1	AMPK.alpha.R.C_GBL.9014828	0.704429	0.0341167
hsa-miR-148b-3p	PTEN	PTEN.R.V_GBL.9014918	0.931517	0.172895
hsa-miR-148b-3p	RPS6KB1	p70S6K.R.V_GBL.9014906	0.918204	0.15647
hsa-miR-149-3p	PTK2	FAK.pY397_GBL.9014963	1.06711	0.0757501
hsa-miR-150-3p	CDH2	N.Cadherin.R.V_GBL.9014893	1.08309	0.0725769
hsa-miR-150-3p	FN1	Fibronectin.R.C_GBL.9014872	0.767621	0.0511612
hsa-miR-150-3p	NOTCH3	Notch3.R.C_GBL.9014897	0.938674	0.308268
hsa-miR-151a-3p	AKT3	Akt_pS473.R.V_GBL.9014825	0.453195	0.0058691
hsa-miR-151a-3p	NF2	NF2.R.C_GBL.9014894	0.922904	0.0527769
hsa-miR-151a-3p	PTEN	PTEN.R.V_GBL.9014918	1.30567	0.00777764
hsa-miR-153	AKT3	Akt_pS473.R.V_GBL.9014825	0.572535	0.0114873
hsa-miR-153	CDKN1B	p27.R.V_GBL.9014994	1.004	0.478683
hsa-miR-153	FOXO3	FOXO3a.R.C_GBL.9014874	0.823651	0.066362
hsa-miR-153	IGF1R	IGF.1R.beta.R.C_GBL.9014883	0.960117	0.0282136
hsa-miR-153	MET	c.Met_pY1235.R.C_GBL.9014852	1.12144	0.00808905
hsa-miR-153	PEA15	Pea.15.R.V_GBL.9014911	1.15036	0.0928951
hsa-miR-153	PRKAA1	AMPK.alpha.R.C_GBL.9014828	0.870758	0.154583
hsa-miR-153	PTEN	PTEN.R.V_GBL.9014918	1.22893	0.0167829
hsa-miR-153	RPS6KB1	p70S6K_pT389.R.V_GBL.9014905	0.630311	0.000113639
hsa-miR-153	SRC	Src.M.V_GBL.9014966	0.639773	0.0136206
hsa-miR-153	YBX1	YB.1_pS102.R.V_GBL.9014934	1.04471	0.364208
hsa-miR-15b-5p	ACACA	ACC_pS79.R.V_GBL.9014843	0.827091	0.0491612
hsa-miR-15b-5p	AKT3	Akt_pT308.R.V_GBL.9014971	0.630275	0.220279
hsa-miR-15b-5p	BCL2	Bcl.2.M.V_GBL.9014998	0.825947	0.145295
hsa-miR-15b-5p	CCND1	Cyclin.D1.R.V_GBL.9014859	1.02103	0.407714
hsa-miR-15b-5p	CCNE1	Cyclin_E1.M.V_GBL.9014950	0.788587	0.0109225
hsa-miR-15b-5p	CHEK1	Chk1_pS345.R.C_GBL.9014845	0.891882	0.0853304
hsa-miR-15b-5p	CTNNB1	beta.Catenin.R.V_GBL.9014836	0.994931	0.467429
hsa-miR-15b-5p	EIF4E	eIF4E.R.V_GBL.9014868	0.815119	0.0600476
hsa-miR-15b-5p	IGF1R	IGF.1R.beta.R.C_GBL.9014883	1.13953	0.000899206
hsa-miR-15b-5p	KDR	VEGFR2.R.V_GBL.9014932	1.12947	0.179333
hsa-miR-15b-5p	MAP2K1	MEK1.R.V_GBL.9014890	0.812724	0.00906596
hsa-miR-15b-5p	MAPK9	JNK2.R.C_GBL.9014886	0.766442	0.0937886
hsa-miR-15b-5p	NF2	NF2.R.C_GBL.9014894	0.902961	0.0315685
hsa-miR-15b-5p	PTCH1	PTCH.R.C_GBL.9014917	0.803604	0.00523983
hsa-miR-15b-5p	RAF1	C.Raf.R.V_GBL.9014857	0.709395	0.0177641
hsa-miR-15b-5p	RPS6KB1	p70S6K.R.V_GBL.9014906	0.939668	0.21895
hsa-miR-15b-5p	YAP1	YAP.R.V_GBL.9014936	0.946393	0.22483
hsa-miR-15b-5p	YWHAE	X14.3.3_epsilon.M.C_GBL.9014939	0.89515	0.0610833
hsa-miR-17-5p	AKT3	Akt_pS473.R.V_GBL.9014825	0.827086	0.0897456
hsa-miR-17-5p	BCL2L11	Bim.R.V_GBL.9014838	1.13028	0.0336625
hsa-miR-17-5p	BECN1	Beclin.G.V_GBL.9014969	0.844394	0.0635763
hsa-miR-17-5p	CASP7	Caspase.7_cleavedD198.R.C_GBL.9014840	0.902979	0.281904
hsa-miR-17-5p	CCND1	Cyclin.D1.R.V_GBL.9014859	0.771721	0.0349298
hsa-miR-17-5p	CDKN1A	p21.R.C_GBL.9014898	0.95062	0.222066
hsa-miR-17-5p	ERBB3	HER3_pY1298.R.C_GBL.9014880	0.896952	0.0472632
hsa-miR-17-5p	ESR1	ER.alpha.R.V_GBL.9014870	0.872649	0.331763
hsa-miR-17-5p	MAP2K1	MEK1.R.V_GBL.9014890	0.939156	0.111783
hsa-miR-17-5p	MAPK9	JNK2.R.C_GBL.9014886	0.826896	0.148319
hsa-miR-17-5p	MET	c.Met.M.C_GBL.9014985	0.985652	0.381953
hsa-miR-17-5p	MYC	c.Myc.R.C_GBL.9014853	0.900019	0.00712066
hsa-miR-17-5p	NCOA3	AIB1.M.V_GBL.9014940	0.988967	0.40087
hsa-miR-17-5p	PIK3R1	PI3K.p85.R.V_GBL.9014913	0.974614	0.229854
hsa-miR-17-5p	PTEN	PTEN.R.V_GBL.9014918	1.13055	0.0616601
hsa-miR-17-5p	PTK2	FAK.R.C_GBL.9014871	0.97856	0.223037
hsa-miR-17-5p	RB1	Rb.M.V_GBL.9014952	0.875391	0.0866615
hsa-miR-17-5p	SMAD1	Smad1.R.V_GBL.9014923	0.821052	0.0511118
hsa-miR-17-5p	SMAD4	Smad4.M.V_GBL.9014964	0.94255	0.147595
hsa-miR-17-5p	SRC	Src_pY416.R.C_GBL.9014925	0.750329	0.0143229
hsa-miR-17-5p	STAT3	STAT3_pY705.R.V_GBL.9014927	1.0272	0.334756
hsa-miR-17-5p	VASP	VASP.R.C_GBL.9014877	1.01006	0.443056
hsa-miR-181b-5p	AKT3	Akt_pS473.R.V_GBL.9014825	0.581676	0.0121664
hsa-miR-181b-5p	BCL2	Bcl.2.M.V_GBL.9014998	0.859986	0.189477
hsa-miR-181b-5p	CDK1	CDK1.R.V_GBL.9014844	0.93614	0.319735
hsa-miR-181b-5p	CDKN1B	p27_pT157.R.C_GBL.9014899	0.033038	0.000316835
hsa-miR-181b-5p	CTNNA1	alpha.Catenin.M.V_GBL.9014941	0.704674	0.314721
hsa-miR-181b-5p	MAP2K1	MEK1_pS217_S221.R.V_GBL.9014889	0.887308	0.00136845
hsa-miR-181b-5p	MET	c.Met_pY1235.R.C_GBL.9014852	0.862992	0.0057984
hsa-miR-181b-5p	RPS6KB1	p70S6K.R.V_GBL.9014906	0.991657	0.454791
hsa-miR-181b-5p	SNAI2	Snail.M.C_GBL.9014965	1.06976	0.382779
hsa-miR-181c-3p	CASP8	Caspase.8.M.C_GBL.9014945	0.794294	0.0122367
hsa-miR-181c-3p	ESR1	ER.alpha.R.V_GBL.9014870	0.928885	0.402858
hsa-miR-181c-3p	FOXO3	FOXO3A_pS318_S321.R.C_GBL.9014873	0.831621	0.0869712
hsa-miR-181c-3p	YWHAE	X14.3.3_epsilon.M.C_GBL.9014939	0.97695	0.335253
hsa-miR-185-3p	PTEN	PTEN.R.V_GBL.9014918	1.40738	0.00348253
hsa-miR-18a-3p	CAV1	Caveolin.1.R.V_GBL.9014842	0.703679	0.0335524
hsa-miR-18a-3p	CTNNB1	beta.Catenin.R.V_GBL.9014836	1.02116	0.367769
hsa-miR-18a-3p	ESR1	ER.alpha.R.V_GBL.9014870	0.900859	0.366529
hsa-miR-18a-3p	GSK3A	GSK3.alpha.beta.M.V_GBL.9014954	0.934896	0.0632238
hsa-miR-18a-3p	NOTCH3	Notch3.R.C_GBL.9014897	0.906737	0.229683
hsa-miR-18a-3p	RPS6KB1	p70S6K.R.V_GBL.9014906	1.01969	0.394934
hsa-miR-18a-3p	SMAD1	Smad1.R.V_GBL.9014923	0.842524	0.0664002
hsa-miR-18a-5p	AKT3	Akt_pS473.R.V_GBL.9014825	0.514506	0.00814758
hsa-miR-18a-5p	CCND1	Cyclin.D1.R.V_GBL.9014859	1.03105	0.365937
hsa-miR-18a-5p	CTNNA1	alpha.Catenin.M.V_GBL.9014941	0.653299	0.287082
hsa-miR-18a-5p	ESR1	ER.alpha_pS118.R.V_GBL.9014869	1.02283	0.129936
hsa-miR-18a-5p	GAB2	GAB2.R.V_GBL.9014875	0.526127	0.000141424
hsa-miR-18a-5p	GSK3B	GSK3alpha.beta_pS21_S9.R.V_GBL.9014876	0.99763	0.48376
hsa-miR-18a-5p	LCK	Lck.R.V_GBL.9014887	1.03582	0.251936
hsa-miR-18a-5p	MET	c.Met_pY1235.R.C_GBL.9014852	0.920692	0.0245435
hsa-miR-18a-5p	NCOA3	AIB1.M.V_GBL.9014940	1.14454	0.0184851
hsa-miR-18a-5p	RAF1	C.Raf.R.V_GBL.9014857	0.736414	0.0227074
hsa-miR-18a-5p	RB1	Rb_pS807_S811.R.V_GBL.9014920	0.685984	0.00846885
hsa-miR-18a-5p	RPS6KB1	p70S6K.R.V_GBL.9014906	1.12865	0.0765888
hsa-miR-18a-5p	SMAD1	Smad1.R.V_GBL.9014923	0.920588	0.188665
hsa-miR-18a-5p	TP53BP1	X53BP1.R.C_GBL.9014822	1.08793	0.136172
hsa-miR-18a-5p	WWTR1	TAZ_pS89.R.C_GBL.9014930	0.91937	0.161123
hsa-miR-18a-5p	YAP1	YAP_pS127.R.C_GBL.9014935	0.993102	0.461859
hsa-miR-18a-5p	YBX1	YB.1_pS102.R.V_GBL.9014934	0.757518	0.0652743
hsa-miR-18b-5p	AKT3	Akt_pS473.R.V_GBL.9014825	0.565863	0.0110222
hsa-miR-18b-5p	BCL2L11	Bim.R.V_GBL.9014838	1.30396	0.00360971
hsa-miR-18b-5p	CTNNA1	alpha.Catenin.M.V_GBL.9014941	0.74534	0.337831
hsa-miR-18b-5p	ESR1	ER.alpha.R.V_GBL.9014870	0.731247	0.192483
hsa-miR-18b-5p	GAB2	GAB2.R.V_GBL.9014875	0.5458	0.000160478
hsa-miR-18b-5p	GSK3B	GSK3.alpha.beta.M.V_GBL.9014954	0.941343	0.0773534
hsa-miR-18b-5p	MET	c.Met_pY1235.R.C_GBL.9014852	1.01963	0.242663
hsa-miR-18b-5p	NCOA3	AIB1.M.V_GBL.9014940	1.17939	0.0105056
hsa-miR-18b-5p	RB1	Rb_pS807_S811.R.V_GBL.9014920	0.790587	0.024297
hsa-miR-18b-5p	WWTR1	TAZ_pS89.R.C_GBL.9014930	0.965406	0.32345
hsa-miR-18b-5p	YAP1	YAP.R.V_GBL.9014936	0.916762	0.135426
hsa-miR-18b-5p	YBX1	YB.1_pS102.R.V_GBL.9014934	0.828955	0.120401
hsa-miR-190a	CAV1	Caveolin.1.R.V_GBL.9014842	1.46938	0.010516
hsa-miR-190a	CDH2	N.Cadherin.R.V_GBL.9014893	0.943948	0.139148
hsa-miR-190a	CDKN1B	p27.R.V_GBL.9014937	0.72838	0.0362954
hsa-miR-190a	ESR1	ER.alpha.R.V_GBL.9014870	0.753647	0.210456
hsa-miR-190a	PTCH1	PTCH.R.C_GBL.9014917	0.863387	0.0140449
hsa-miR-190a	SMAD4	Smad4.M.V_GBL.9014964	0.982131	0.360131
hsa-miR-193a-3p	PIK3R1	PI3K.p85.R.V_GBL.9014913	0.731254	0.00146878
hsa-miR-193a-3p	PTEN	PTEN.R.V_GBL.9014918	1.25987	0.0120516
hsa-miR-193a-3p	STMN1	Stathmin.R.V_GBL.9014929	0.897239	0.0548006
hsa-miR-193b-3p	KIT	c.Kit.R.V_GBL.9014850	0.821133	0.313473
hsa-miR-193b-3p	PTEN	PTEN.R.V_GBL.9014918	1.12894	0.0632173
hsa-miR-193b-5p	AKT3	Akt_pS473.R.V_GBL.9014825	0.539314	0.00939614
hsa-miR-193b-5p	PTEN	PTEN.R.V_GBL.9014918	1.28802	0.00914636
hsa-miR-193b-5p	YBX1	YB.1_pS102.R.V_GBL.9014934	0.864608	0.165967
hsa-miR-195-3p	BCL2L11	Bim.R.V_GBL.9014838	1.11721	0.0428024
hsa-miR-195-3p	CDH2	N.Cadherin.R.V_GBL.9014893	0.95195	0.169934
hsa-miR-195-3p	CDK1	CDK1.R.V_GBL.9014844	0.807234	0.107511
hsa-miR-195-3p	ERRFI1	MIG.6.M.V_GBL.9014957	0.955335	0.13835
hsa-miR-195-3p	KIT	c.Kit.R.V_GBL.9014850	0.99017	0.489102
hsa-miR-195-3p	MYC	c.Myc.R.C_GBL.9014853	0.916697	0.0116748
hsa-miR-195-3p	PIK3R1	PI3K.p85.R.V_GBL.9014913	0.90481	0.0251982
hsa-miR-195-3p	PTCH1	PTCH.R.C_GBL.9014917	0.932194	0.070812
hsa-miR-195-3p	SRC	Src_pY416.R.C_GBL.9014925	0.804467	0.0265273
hsa-miR-195-3p	YWHAE	X14.3.3_epsilon.M.C_GBL.9014939	1.00561	0.45806
hsa-miR-199b-5p	ACACA	ACC_pS79.R.V_GBL.9014843	0.90632	0.144487
hsa-miR-199b-5p	BECN1	Beclin.G.V_GBL.9014969	0.923689	0.189899
hsa-miR-199b-5p	CAV1	Caveolin.1.R.V_GBL.9014842	0.973724	0.40955
hsa-miR-199b-5p	CDH2	N.Cadherin.R.V_GBL.9014893	0.981164	0.343609
hsa-miR-199b-5p	GSK3B	GSK3alpha.beta_pS21_S9.R.V_GBL.9014876	0.830033	0.0252492
hsa-miR-199b-5p	MAPK9	JNK2.R.C_GBL.9014886	1.0278	0.426266
hsa-miR-199b-5p	MET	c.Met_pY1235.R.C_GBL.9014852	0.83465	0.00341315
hsa-miR-199b-5p	PTK2	FAK.R.C_GBL.9014871	0.951718	0.0717228
hsa-miR-199b-5p	PXN	Paxillin.R.V_GBL.9014908	0.705604	0.00557059
hsa-miR-199b-5p	RB1	Rb_pS807_S811.R.V_GBL.9014920	0.891191	0.0964662
hsa-miR-199b-5p	RPS6KB1	p70S6K_pT389.R.V_GBL.9014905	1.16354	0.00127122
hsa-miR-19a-3p	CCND1	Cyclin.D1.R.V_GBL.9014859	0.833964	0.0689196
hsa-miR-19a-3p	ERBB3	HER3.R.V_GBL.9014881	0.892494	0.106398
hsa-miR-19a-3p	ERRFI1	MIG.6.M.V_GBL.9014987	1.00393	0.477543
hsa-miR-19a-3p	ESR1	ER.alpha.R.V_GBL.9014870	0.751402	0.208587
hsa-miR-19a-3p	GSK3B	GSK3.alpha.beta.M.V_GBL.9014954	0.999271	0.491354
hsa-miR-19a-3p	KIT	c.Kit.R.V_GBL.9014850	0.77289	0.271223
hsa-miR-19a-3p	MAPK1	MAPK_pT202_Y204.R.V_GBL.9014888	0.896366	0.0121598
hsa-miR-19a-3p	MAPK14	p38_pT180_Y182.R.V_GBL.9014903	0.789157	0.0239926
hsa-miR-19a-3p	NOTCH1	Notch1.R.V_GBL.9014896	1.00064	0.495226
hsa-miR-19a-3p	PEA15	Pea.15.R.V_GBL.9014911	1.03156	0.371706
hsa-miR-19a-3p	PIK3CA	PI3K.p110.alpha.R.C_GBL.9014912	0.852304	0.0596445
hsa-miR-19a-3p	PRKAA1	AMPK_pT172.R.V_GBL.9014829	0.928713	0.041629
hsa-miR-19a-3p	PRKCA	PKC.alpha_pS657.R.V_GBL.9014914	1.02725	0.21057
hsa-miR-19a-3p	PTEN	PTEN.R.V_GBL.9014918	0.853516	0.0485045
hsa-miR-19a-3p	RAF1	C.Raf.R.V_GBL.9014857	0.703665	0.0168977
hsa-miR-19a-3p	SMAD4	Smad4.M.V_GBL.9014964	0.981954	0.358839
hsa-miR-19a-3p	YWHAE	X14.3.3_epsilon.M.C_GBL.9014939	0.998426	0.488212
hsa-miR-19b-1-5p	AKT3	Akt_pS473.R.V_GBL.9014825	0.551762	0.0101168
hsa-miR-19b-1-5p	CAV1	Caveolin.1.R.V_GBL.9014842	1.11634	0.174998
hsa-miR-19b-1-5p	CDH2	N.Cadherin.R.V_GBL.9014893	1.13815	0.0236501
hsa-miR-19b-1-5p	PIK3CA	PI3K.p110.alpha.R.C_GBL.9014912	0.880159	0.0887906
hsa-miR-19b-1-5p	TP53BP1	X53BP1.R.C_GBL.9014822	1.00708	0.460428
hsa-miR-19b-3p	BCL2L11	Bim.R.V_GBL.9014838	1.22649	0.0082051
hsa-miR-19b-3p	CCND1	Cyclin.D1.R.V_GBL.9014859	0.906397	0.169652
hsa-miR-19b-3p	ERBB3	HER3.R.V_GBL.9014881	0.947004	0.246745
hsa-miR-19b-3p	ERRFI1	MIG.6.M.V_GBL.9014957	1.0065	0.429665
hsa-miR-19b-3p	ESR1	ER.alpha.R.V_GBL.9014870	0.912358	0.381242
hsa-miR-19b-3p	GSK3B	GSK3.alpha.beta.M.V_GBL.9014954	0.983821	0.318849
hsa-miR-19b-3p	KIT	c.Kit.R.V_GBL.9014850	0.834396	0.325851
hsa-miR-19b-3p	MAPK1	MAPK_pT202_Y204.R.V_GBL.9014888	0.821438	0.00268379
hsa-miR-19b-3p	MAPK14	p38_pT180_Y182.R.V_GBL.9014903	0.761255	0.0175662
hsa-miR-19b-3p	NOTCH1	Notch1.R.V_GBL.9014896	1.00172	0.487196
hsa-miR-19b-3p	PEA15	Pea.15.R.V_GBL.9014911	1.02811	0.38507
hsa-miR-19b-3p	PIK3CA	PI3K.p110.alpha.R.C_GBL.9014912	0.801087	0.0309361
hsa-miR-19b-3p	PRKAA1	AMPK.alpha.R.C_GBL.9014828	0.881107	0.171493
hsa-miR-19b-3p	PTEN	PTEN.R.V_GBL.9014918	0.87627	0.0685821
hsa-miR-19b-3p	RAF1	C.Raf.R.V_GBL.9014857	0.594111	0.00730482
hsa-miR-19b-3p	SMAD4	Smad4.M.V_GBL.9014964	1.00271	0.478051
hsa-miR-19b-3p	SRC	Src_pY527.R.V_GBL.9014926	0.743407	0.0904333
hsa-miR-19b-3p	YWHAE	X14.3.3_epsilon.M.C_GBL.9014939	0.973547	0.313594
hsa-miR-205-5p	ERBB3	HER3.R.V_GBL.9014881	0.876863	0.0842664
hsa-miR-205-5p	ERRFI1	MIG.6.M.V_GBL.9014957	0.722087	0.00186325
hsa-miR-205-5p	GATA3	GATA3.M.V_GBL.9014953	0.905009	0.034108
hsa-miR-205-5p	NCOA3	AIB1.M.V_GBL.9014940	1.00163	0.485142
hsa-miR-205-5p	SMAD1	Smad1.R.V_GBL.9014923	0.884774	0.115317
hsa-miR-206	CCND1	Cyclin.D1.R.V_GBL.9014859	0.84114	0.0750112
hsa-miR-206	CDH2	N.Cadherin.R.V_GBL.9014893	1.00853	0.426779
hsa-miR-206	EIF4E	eIF4E.R.V_GBL.9014868	0.977997	0.407066
hsa-miR-206	FN1	Fibronectin.R.C_GBL.9014872	0.899798	0.194699
hsa-miR-206	MAPK1	MAPK_pT202_Y204.R.V_GBL.9014888	0.735094	0.000851866
hsa-miR-206	MAPK3	MAPK_pT202_Y204.R.V_GBL.9014888	0.735094	0.000851866
hsa-miR-206	MET	c.Met_pY1235.R.C_GBL.9014852	0.748898	0.00101806
hsa-miR-206	NCOA3	AIB1.M.V_GBL.9014940	1.01636	0.355759
hsa-miR-206	NOTCH3	Notch3.R.C_GBL.9014897	0.779532	0.0695606
hsa-miR-206	SMAD1	Smad1.R.V_GBL.9014923	0.891931	0.127115
hsa-miR-206	SMAD4	Smad4.M.V_GBL.9014964	0.995931	0.467126
hsa-miR-206	SNAI2	Snail.M.C_GBL.9014965	1.26648	0.150451
hsa-miR-206	VASP	VASP.R.C_GBL.9014877	0.901296	0.111879
hsa-miR-208b	BCL2L11	Bim.R.V_GBL.9014838	1.00266	0.47892
hsa-miR-208b	CDH2	N.Cadherin.R.V_GBL.9014893	0.959391	0.20461
hsa-miR-208b	CDKN1A	p21.R.C_GBL.9014898	0.929739	0.149859
hsa-miR-208b	GATA3	GATA3.M.V_GBL.9014953	0.934292	0.0744081
hsa-miR-208b	PTCH1	PTCH.R.C_GBL.9014917	1.09629	0.0334741
hsa-miR-208b	RB1	Rb_pS807_S811.R.V_GBL.9014920	0.914843	0.140844
hsa-miR-208b	YBX1	YB.1_pS102.R.V_GBL.9014934	1.00268	0.491591
hsa-miR-20a-5p	AKT3	Akt_pS473.R.V_GBL.9014825	0.705929	0.0296254
hsa-miR-20a-5p	BCL2L11	Bim.R.V_GBL.9014838	1.09275	0.0696576
hsa-miR-20a-5p	BECN1	Beclin.G.V_GBL.9014969	0.8669	0.0855134
hsa-miR-20a-5p	CASP7	Caspase.7_cleavedD198.R.C_GBL.9014840	0.806872	0.14411
hsa-miR-20a-5p	CCND1	Cyclin.D1.R.V_GBL.9014859	0.82674	0.0633682
hsa-miR-20a-5p	CDKN1A	p21.R.C_GBL.9014898	0.963747	0.28234
hsa-miR-20a-5p	ERBB3	HER3_pY1298.R.C_GBL.9014880	0.901557	0.0521201
hsa-miR-20a-5p	ESR1	ER.alpha_pS118.R.V_GBL.9014869	0.890758	0.00349407
hsa-miR-20a-5p	MAPK1	MAPK_pT202_Y204.R.V_GBL.9014888	0.937817	0.0426272
hsa-miR-20a-5p	MYC	c.Myc.R.C_GBL.9014853	0.9494	0.0400798
hsa-miR-20a-5p	NCOA3	AIB1.M.V_GBL.9014940	1.03736	0.210818
hsa-miR-20a-5p	PIK3R1	PI3K.p85.R.V_GBL.9014913	1.07276	0.0468813
hsa-miR-20a-5p	PTEN	PTEN.R.V_GBL.9014918	1.21381	0.019969
hsa-miR-20a-5p	PTK2	FAK.R.C_GBL.9014871	0.996919	0.453954
hsa-miR-20a-5p	RB1	Rb.M.V_GBL.9014952	0.940998	0.230743
hsa-miR-20a-5p	RPS6KA1	p90RSK_pT359_S363.R.C_GBL.9014907	0.836986	0.0388913
hsa-miR-20a-5p	SMAD1	Smad1.R.V_GBL.9014923	0.850717	0.0736339
hsa-miR-20a-5p	SMAD4	Smad4.M.V_GBL.9014964	1.02262	0.326313
hsa-miR-20a-5p	SRC	Src_pY416.R.C_GBL.9014925	0.851482	0.049744
hsa-miR-20a-5p	STAT3	STAT3_pY705.R.V_GBL.9014927	1.09604	0.0973195
hsa-miR-20a-5p	VASP	VASP.R.C_GBL.9014877	1.03373	0.318755
hsa-miR-20a-5p	XIAP	XIAP.R.C_GBL.9014933	0.794635	0.0197316
hsa-miR-20b-5p	AKT3	Akt.R.V_GBL.9014827	0.919846	0.0882278
hsa-miR-20b-5p	BCL2L11	Bim.R.V_GBL.9014838	1.21526	0.00942105
hsa-miR-20b-5p	BECN1	Beclin.G.V_GBL.9014969	0.94452	0.25464
hsa-miR-20b-5p	CASP7	Caspase.7_cleavedD198.R.C_GBL.9014840	0.893372	0.264216
hsa-miR-20b-5p	CCND1	Cyclin.D1.R.V_GBL.9014859	0.837478	0.0718265
hsa-miR-20b-5p	CDKN1A	p21.R.C_GBL.9014898	0.899135	0.0852299
hsa-miR-20b-5p	ESR1	ER.alpha.R.V_GBL.9014870	0.874123	0.33353
hsa-miR-20b-5p	NCOA3	AIB1.M.V_GBL.9014940	0.991071	0.419324
hsa-miR-20b-5p	PIK3R1	PI3K.p85.R.V_GBL.9014913	0.909172	0.0282264
hsa-miR-20b-5p	PTEN	PTEN.R.V_GBL.9014918	1.24474	0.0141147
hsa-miR-20b-5p	PTK2	FAK.R.C_GBL.9014871	0.958933	0.0961998
hsa-miR-20b-5p	RB1	Rb_pS807_S811.R.V_GBL.9014920	0.82262	0.0360544
hsa-miR-20b-5p	RPS6KA1	p90RSK_pT359_S363.R.C_GBL.9014907	0.846914	0.0447364
hsa-miR-20b-5p	SMAD1	Smad1.R.V_GBL.9014923	0.86385	0.0872457
hsa-miR-20b-5p	STAT3	STAT3_pY705.R.V_GBL.9014927	1.03417	0.297696
hsa-miR-20b-5p	VASP	VASP.R.C_GBL.9014877	0.975549	0.365047
hsa-miR-214-3p	CTNNB1	beta.Catenin.R.V_GBL.9014836	1.01108	0.429236
hsa-miR-214-3p	ERRFI1	MIG.6.M.V_GBL.9014957	0.634825	0.000839175
hsa-miR-214-3p	GSK3B	GSK3alpha.beta_pS21_S9.R.V_GBL.9014876	0.71335	0.00640189
hsa-miR-214-3p	PEA15	Pea.15.R.V_GBL.9014911	1.07636	0.224524
hsa-miR-214-3p	PTEN	PTEN.R.V_GBL.9014918	1.25932	0.0121189
hsa-miR-214-3p	VASP	VASP.R.C_GBL.9014877	0.898587	0.107121
hsa-miR-21-5p	AKT3	Akt_pS473.R.V_GBL.9014825	0.500496	0.00753701
hsa-miR-21-5p	BCL2	Bcl.2.M.V_GBL.9014998	1.16709	0.153391
hsa-miR-21-5p	MSH2	MSH2.M.C_GBL.9014958	0.928146	0.17213
hsa-miR-21-5p	PIK3R1	PI3K.p85.R.V_GBL.9014913	0.935773	0.0609057
hsa-miR-217	AKT3	Akt_pS473.R.V_GBL.9014825	0.437036	0.00541121
hsa-miR-217	CTNNB1	beta.Catenin.R.V_GBL.9014836	0.959831	0.266215
hsa-miR-217	FN1	Fibronectin.R.C_GBL.9014872	0.90809	0.212529
hsa-miR-217	FOXO3	FOXO3a.R.C_GBL.9014874	0.672744	0.01595
hsa-miR-217	MAPK1	MAPK_pT202_Y204.R.V_GBL.9014888	0.950025	0.0673384
hsa-miR-217	PTEN	PTEN.R.V_GBL.9014918	1.12024	0.0724707
hsa-miR-217	RPS6KB1	p70S6K.R.V_GBL.9014906	0.855878	0.0613948
hsa-miR-217	VASP	VASP.R.C_GBL.9014877	1.09726	0.114513
hsa-miR-218-5p	CDH2	N.Cadherin.R.V_GBL.9014893	0.95479	0.182439
hsa-miR-218-5p	GSK3B	GSK3alpha.beta_pS21_S9.R.V_GBL.9014876	0.903917	0.0855434
hsa-miR-218-5p	INPP4B	INPP4B.G.C_GBL.9014970	0.94858	0.178095
hsa-miR-218-5p	KIT	c.Kit.R.V_GBL.9014850	0.869472	0.360032
hsa-miR-218-5p	PXN	Paxillin.R.V_GBL.9014908	1.01932	0.368404
hsa-miR-218-5p	RPS6KB1	p70S6K.R.V_GBL.9014906	0.769458	0.021071
hsa-miR-218-5p	SNAI2	Snail.M.C_GBL.9014965	1.13987	0.279746
hsa-miR-219-1-3p	FN1	Fibronectin.R.C_GBL.9014872	0.818305	0.0831316
hsa-miR-219-1-3p	NOTCH3	Notch3.R.C_GBL.9014897	0.874966	0.169406
hsa-miR-219-1-3p	PTEN	PTEN.R.V_GBL.9014918	1.34346	0.00563452
hsa-miR-219-1-3p	YWHAE	X14.3.3_epsilon.M.C_GBL.9014939	1.07867	0.103573
hsa-miR-219-5p	CDH3	P.Cadherin.R.C_GBL.9014909	0.904409	0.199429
hsa-miR-219-5p	ESR1	ER.alpha_pS118.R.V_GBL.9014869	0.976504	0.124544
hsa-miR-219-5p	FOXO3	FOXO3A_pS318_S321.R.C_GBL.9014873	0.887412	0.160319
hsa-miR-219-5p	GSK3B	GSK3.alpha.beta.M.V_GBL.9014954	0.831009	0.00605595
hsa-miR-219-5p	NFKB1	NF.kB.p65_pS536.R.C_GBL.9014895	0.812667	0.00987039
hsa-miR-219-5p	PTEN	PTEN.R.V_GBL.9014918	0.805087	0.0251225
hsa-miR-219-5p	XIAP	XIAP.R.C_GBL.9014933	0.832163	0.0322642
hsa-miR-221-3p	BCL2L11	Bim.R.V_GBL.9014838	1.17823	0.0155379
hsa-miR-221-3p	CDH2	N.Cadherin.R.V_GBL.9014893	1.08077	0.0765786
hsa-miR-221-3p	CDKN1B	p27.R.V_GBL.9014937	0.775822	0.0552571
hsa-miR-221-3p	CTNNB1	beta.Catenin.R.V_GBL.9014836	0.635914	0.00390421
hsa-miR-221-3p	ERBB3	HER3.R.V_GBL.9014881	0.785482	0.0256801
hsa-miR-221-3p	ESR1	ER.alpha_pS118.R.V_GBL.9014869	0.961475	0.0506896
hsa-miR-221-3p	KIT	c.Kit.R.V_GBL.9014850	1.08347	0.408721
hsa-miR-221-3p	PTK2	FAK.pY397_GBL.9014963	0.773387	0.0037569
hsa-miR-221-3p	RPS6KB1	p70S6K.R.V_GBL.9014906	0.968162	0.334897
hsa-miR-222-3p	BCL2L11	Bim.R.V_GBL.9014838	1.33319	0.0027772
hsa-miR-222-3p	CDH2	N.Cadherin.R.V_GBL.9014893	0.903181	0.0534015
hsa-miR-222-3p	CDKN1B	p27.R.V_GBL.9014937	0.800731	0.0700028
hsa-miR-222-3p	CTNNB1	beta.Catenin.R.V_GBL.9014836	0.785433	0.0164696
hsa-miR-222-3p	ERBB3	HER3_pY1298.R.C_GBL.9014880	1.0979	0.052734
hsa-miR-222-3p	ESR1	ER.alpha.R.V_GBL.9014870	1.13352	0.324437
hsa-miR-222-3p	KDR	VEGFR2.R.V_GBL.9014932	1.01328	0.459353
hsa-miR-222-3p	KIT	c.Kit.R.V_GBL.9014850	0.992775	0.491989
hsa-miR-222-3p	PGR	PR.R.V_GBL.9014916	1.74998	0.0664159
hsa-miR-222-3p	PTK2	FAK.R.C_GBL.9014871	0.899178	0.0130096
hsa-miR-222-3p	RPS6KB1	p70S6K.R.V_GBL.9014906	0.955015	0.276679
hsa-miR-222-3p	YWHAE	X14.3.3_epsilon.M.C_GBL.9014939	0.864619	0.035087
hsa-miR-22-3p	AKT3	Akt_pS473.R.V_GBL.9014825	0.400312	0.00453188
hsa-miR-22-3p	ERBB3	HER3.R.V_GBL.9014881	0.764482	0.020383
hsa-miR-22-3p	ESR1	ER.alpha_pS118.R.V_GBL.9014869	0.97423	0.107868
hsa-miR-22-3p	MAPK14	p38_MAPK.R.C_GBL.9014902	0.791709	0.0416506
hsa-miR-22-3p	PTEN	PTEN.R.V_GBL.9014918	0.867138	0.0595087
hsa-miR-224-3p	BCL2	Bcl.2.M.V_GBL.9014998	1.18879	0.129594
hsa-miR-224-3p	CCND1	Cyclin.D1.R.V_GBL.9014859	0.896306	0.149018
hsa-miR-224-3p	GAB2	GAB2.R.V_GBL.9014875	0.574714	0.000195212
hsa-miR-224-3p	JUN	c.Jun_pS73.R.C_GBL.9014849	1.02106	0.356408
hsa-miR-224-3p	KIT	c.Kit.R.V_GBL.9014850	0.852692	0.343429
hsa-miR-224-3p	MAP2K1	MEK1.R.V_GBL.9014890	0.816517	0.00958212
hsa-miR-224-3p	MAPK9	JNK2.R.C_GBL.9014886	0.8734	0.212307
hsa-miR-224-3p	NOTCH1	Notch1.R.V_GBL.9014896	0.854641	0.0300771
hsa-miR-224-3p	RB1	Rb_pS807_S811.R.V_GBL.9014920	0.641609	0.00588416
hsa-miR-23b-3p	CASP7	Caspase.7_cleavedD198.R.C_GBL.9014840	0.809294	0.146594
hsa-miR-23b-3p	GSK3B	GSK3.alpha.beta.M.V_GBL.9014954	1.11113	0.0185582
hsa-miR-23b-3p	MAPK14	p38_MAPK.R.C_GBL.9014902	0.883253	0.123492
hsa-miR-23b-3p	MET	c.Met.M.C_GBL.9014985	0.927107	0.0967065
hsa-miR-23b-3p	PTEN	PTEN.R.V_GBL.9014918	1.11156	0.0833431
hsa-miR-23b-3p	SNAI2	Snail.M.C_GBL.9014965	0.932896	0.387043
hsa-miR-23b-3p	XIAP	XIAP.R.C_GBL.9014933	0.765539	0.0140354
hsa-miR-24-3p	AKT3	Akt_pS473.R.V_GBL.9014825	0.546114	0.00978122
hsa-miR-24-3p	BCL2L11	Bim.R.V_GBL.9014838	1.12052	0.040221
hsa-miR-24-3p	CDKN1B	p27_pT157.R.C_GBL.9014899	0.797056	0.025359
hsa-miR-24-3p	DVL3	Dvl3.R.V_GBL.9014861	0.945143	0.30751
hsa-miR-24-3p	ERBB3	HER3.R.V_GBL.9014881	1.10651	0.108024
hsa-miR-24-3p	GSK3A	GSK3.alpha.beta.M.V_GBL.9014954	1.02358	0.251001
hsa-miR-24-3p	GSK3B	GSK3.alpha.beta.M.V_GBL.9014954	1.02358	0.251001
hsa-miR-24-3p	MAPK14	p38_MAPK.R.C_GBL.9014902	0.979425	0.408393
hsa-miR-24-3p	MYC	c.Myc.R.C_GBL.9014853	0.898309	0.00679529
hsa-miR-24-3p	RPS6KB1	p70S6K.R.V_GBL.9014906	0.990331	0.447665
hsa-miR-26a-1-3p	NCOA3	AIB1.M.V_GBL.9014940	0.823461	0.0109669
hsa-miR-26a-5p	CCNE1	Cyclin_E1.M.V_GBL.9014986	0.931159	0.0598122
hsa-miR-26a-5p	CDH2	N.Cadherin.R.V_GBL.9014893	1.01824	0.348152
hsa-miR-26a-5p	CTNNB1	beta.Catenin.R.V_GBL.9014836	0.78586	0.0165543
hsa-miR-26a-5p	EIF4E	eIF4E.R.V_GBL.9014868	1.01961	0.416928
hsa-miR-26a-5p	ERRFI1	MIG.6.M.V_GBL.9014957	1.09475	0.0335518
hsa-miR-26a-5p	GSK3B	GSK3.alpha.beta.M.V_GBL.9014954	0.943052	0.0816982
hsa-miR-26a-5p	PECAM1	CD31.M.V_GBL.9014946	1.02822	0.207384
hsa-miR-26a-5p	PTEN	PTEN.R.V_GBL.9014918	0.745189	0.0126953
hsa-miR-26a-5p	PTGS2	COX.2.R.C_GBL.9014979	0.893562	0.138391
hsa-miR-26a-5p	RB1	Rb_pS807_S811.R.V_GBL.9014920	0.908121	0.126316
hsa-miR-26a-5p	SMAD1	Smad1.R.V_GBL.9014923	0.800857	0.0404651
hsa-miR-26a-5p	YWHAE	X14.3.3_epsilon.M.C_GBL.9014939	1.11669	0.0488652
hsa-miR-29a-3p	ACACA	ACC1.R.C_GBL.9014824	0.963498	0.189811
hsa-miR-29a-3p	AKT3	Akt_pS473.R.V_GBL.9014825	0.438247	0.00544387
hsa-miR-29a-3p	BAK1	Bak.R.C_GBL.9014832	0.902026	0.0637103
hsa-miR-29a-3p	CCNE1	Cyclin_E1.M.V_GBL.9014986	1.04613	0.121819
hsa-miR-29a-3p	ERRFI1	MIG.6.M.V_GBL.9014957	0.839944	0.00884001
hsa-miR-29a-3p	GSK3B	GSK3.alpha.beta.M.V_GBL.9014954	0.960271	0.144953
hsa-miR-29a-3p	NCOA3	AIB1.M.V_GBL.9014940	0.809183	0.00889325
hsa-miR-29a-3p	PIK3R1	PI3K.p85.R.V_GBL.9014913	0.859535	0.0092112
hsa-miR-29a-3p	PTEN	PTEN.R.V_GBL.9014918	0.880335	0.0731423
hsa-miR-29a-3p	WWTR1	TAZ_pS89.R.C_GBL.9014930	1.0113	0.439454
hsa-miR-29a-3p	YWHAE	X14.3.3_epsilon.M.C_GBL.9014939	0.943135	0.165139
hsa-miR-29b-2-5p	CDH2	N.Cadherin.R.V_GBL.9014893	1.07291	0.0921445
hsa-miR-29b-2-5p	CTNNB1	beta.Catenin.R.V_GBL.9014836	0.88592	0.0698027
hsa-miR-29b-2-5p	GSK3B	GSK3.alpha.beta.M.V_GBL.9014954	0.960864	0.14792
hsa-miR-29b-2-5p	MET	c.Met.M.C_GBL.9014985	0.972487	0.286559
hsa-miR-29b-2-5p	YAP1	YAP_pS127.R.C_GBL.9014935	0.881229	0.0856156
hsa-miR-29b-2-5p	YWHAE	X14.3.3_epsilon.M.C_GBL.9014939	1.00392	0.470668
hsa-miR-29b-3p	ACACA	ACC1.R.C_GBL.9014824	1.05204	0.119524
hsa-miR-29b-3p	AKT3	Akt_pS473.R.V_GBL.9014825	0.469294	0.00637701
hsa-miR-29b-3p	BAK1	Bak.R.C_GBL.9014832	0.840452	0.0211017
hsa-miR-29b-3p	CCNE1	Cyclin_E1.M.V_GBL.9014986	1.07881	0.0449348
hsa-miR-29b-3p	CDKN1A	p21.R.C_GBL.9014898	0.883861	0.0652899
hsa-miR-29b-3p	FOXO3	FOXO3a.R.C_GBL.9014874	0.941616	0.27297
hsa-miR-29b-3p	GSK3B	GSK3.alpha.beta.M.V_GBL.9014954	0.932152	0.058153
hsa-miR-29b-3p	IRS1	IRS1.R.V_GBL.9014885	0.718469	0.000375445
hsa-miR-29b-3p	MET	c.Met.M.C_GBL.9014985	1.00873	0.427143
hsa-miR-29b-3p	NCOA3	AIB1.M.V_GBL.9014940	0.787949	0.00665989
hsa-miR-29b-3p	PIK3R1	PI3K.p85.R.V_GBL.9014913	0.975686	0.23855
hsa-miR-29b-3p	PTEN	PTEN.R.V_GBL.9014918	0.910732	0.120883
hsa-miR-29b-3p	WWTR1	TAZ_pS89.R.C_GBL.9014930	0.948205	0.25139
hsa-miR-29b-3p	YWHAE	X14.3.3_epsilon.M.C_GBL.9014939	1.12324	0.0433865
hsa-miR-29c-3p	ACACA	ACC1.R.C_GBL.9014824	0.991284	0.410973
hsa-miR-29c-3p	AKT3	Akt_pS473.R.V_GBL.9014825	0.403409	0.00459846
hsa-miR-29c-3p	BAK1	Bak.R.C_GBL.9014832	0.821044	0.0157559
hsa-miR-29c-3p	CCNE1	Cyclin_E1.M.V_GBL.9014950	1.02256	0.335564
hsa-miR-29c-3p	FOXO3	FOXO3a.R.C_GBL.9014874	0.794805	0.0485594
hsa-miR-29c-3p	GSK3B	GSK3.alpha.beta.M.V_GBL.9014954	0.931689	0.0573461
hsa-miR-29c-3p	IRS1	IRS1.R.V_GBL.9014885	0.69151	0.000286204
hsa-miR-29c-3p	NCOA3	AIB1.M.V_GBL.9014940	0.746076	0.00402129
hsa-miR-29c-3p	PIK3R1	PI3K.p85.R.V_GBL.9014913	0.960097	0.137831
hsa-miR-29c-3p	PTEN	PTEN.R.V_GBL.9014918	0.917707	0.136212
hsa-miR-29c-3p	WWTR1	TAZ_pS89.R.C_GBL.9014930	1.02701	0.359267
hsa-miR-29c-3p	YWHAE	X14.3.3_epsilon.M.C_GBL.9014939	1.03765	0.249337
hsa-miR-30d-5p	AKT3	Akt_pS473.R.V_GBL.9014825	0.883317	0.162052
hsa-miR-30d-5p	AR	AR.R.V_GBL.9014831	0.897306	0.0731308
hsa-miR-30d-5p	BCL2	Bcl.2.M.V_GBL.9014998	0.863647	0.194955
hsa-miR-30d-5p	BCL2L11	Bim.R.V_GBL.9014838	1.16445	0.0190952
hsa-miR-30d-5p	IGF1R	IGF.1R.beta.R.C_GBL.9014883	0.936	0.00832725
hsa-miR-30d-5p	NCOA3	AIB1.M.V_GBL.9014940	1.02587	0.283039
hsa-miR-30d-5p	NOTCH1	Notch1.R.V_GBL.9014896	0.98398	0.383325
hsa-miR-30d-5p	RPS6KB1	p70S6K.R.V_GBL.9014906	0.87478	0.0805276
hsa-miR-30d-5p	SMAD1	Smad1.R.V_GBL.9014923	0.822156	0.0517865
hsa-miR-30d-5p	SNAI2	Snail.M.C_GBL.9014965	1.036	0.438476
hsa-miR-30d-5p	WWTR1	TAZ_pS89.R.C_GBL.9014930	0.706555	0.0115486
hsa-miR-30d-5p	YBX1	YB.1_pS102.R.V_GBL.9014934	0.992983	0.478027
hsa-miR-323b-5p	FN1	Fibronectin.R.C_GBL.9014872	0.726607	0.0356982
hsa-miR-323b-5p	GSK3B	GSK3.alpha.beta.M.V_GBL.9014954	0.747935	0.00194232
hsa-miR-32-3p	BAX	Bax.R.V_GBL.9014833	1.03984	0.106163
hsa-miR-32-3p	BECN1	Beclin.G.V_GBL.9014969	1.02826	0.364477
hsa-miR-32-3p	CDK1	CDK1.R.V_GBL.9014947	0.951726	0.169167
hsa-miR-32-3p	GSK3A	GSK3alpha.beta_pS21_S9.R.V_GBL.9014876	0.842119	0.0301535
hsa-miR-32-3p	IGF1R	IGF.1R.beta.R.C_GBL.9014883	1.09482	0.00276364
hsa-miR-32-3p	IRS1	IRS1.R.V_GBL.9014885	0.995559	0.418368
hsa-miR-32-3p	PTK2	FAK.R.C_GBL.9014871	0.998417	0.476278
hsa-miR-32-3p	RAF1	C.Raf_pS338.R.C_GBL.9014856	0.769874	0.120692
hsa-miR-32-3p	YWHAE	X14.3.3_epsilon.M.C_GBL.9014939	0.876704	0.0433434
hsa-miR-330-5p	AKT3	Akt_pT308.R.V_GBL.9014971	0.863658	0.382584
hsa-miR-330-5p	BCL2L1	Bcl.xL.R.V_GBL.9014834	0.83271	0.0667587
hsa-miR-330-5p	CDH3	P.Cadherin.R.C_GBL.9014909	1.0888	0.214613
hsa-miR-335-5p	CASP7	Caspase.7_cleavedD198.R.C_GBL.9014840	0.938643	0.354968
hsa-miR-335-5p	ESR1	ER.alpha.R.V_GBL.9014870	0.548788	0.0935028
hsa-miR-335-5p	IRS1	IRS1.R.V_GBL.9014885	0.925337	0.01627
hsa-miR-335-5p	MET	c.Met_pY1235.R.C_GBL.9014852	0.827456	0.00302246
hsa-miR-335-5p	PGR	PR.R.V_GBL.9014916	1.07048	0.429788
hsa-miR-33b-3p	CDH2	N.Cadherin.R.V_GBL.9014893	1.02598	0.291845
hsa-miR-33b-3p	KIT	c.Kit.R.V_GBL.9014850	1.02804	0.468957
hsa-miR-34a-5p	BCL2	Bcl.2.M.V_GBL.9014998	0.636326	0.0377095
hsa-miR-34a-5p	ERRFI1	MIG.6.M.V_GBL.9014987	1.01032	0.441271
hsa-miR-34a-5p	GATA3	GATA3.M.V_GBL.9014953	0.925936	0.0587781
hsa-miR-34a-5p	MAP2K1	MEK1.R.V_GBL.9014890	0.657307	0.00164381
hsa-miR-34a-5p	MET	c.Met_pY1235.R.C_GBL.9014852	0.705495	0.000636931
hsa-miR-34a-5p	NOTCH1	Notch1.R.V_GBL.9014896	2.03529	0.00011824
hsa-miR-34a-5p	PEA15	Pea.15.R.V_GBL.9014911	0.952573	0.313539
hsa-miR-34a-5p	SMAD4	Smad4.M.V_GBL.9014964	0.937121	0.130092
hsa-miR-34b-3p	CTNNA1	alpha.Catenin.M.V_GBL.9014941	0.731856	0.330053
hsa-miR-34b-3p	ESR1	ER.alpha.R.V_GBL.9014870	0.928037	0.401737
hsa-miR-34b-3p	FOXO3	FOXO3a.R.C_GBL.9014874	0.88573	0.138008
hsa-miR-34b-3p	GSK3B	GSK3alpha.beta_pS21_S9.R.V_GBL.9014876	0.980062	0.367373
hsa-miR-34b-3p	MET	c.Met.M.C_GBL.9014985	0.886843	0.040424
hsa-miR-34b-3p	RB1	Rb.M.V_GBL.9014952	0.843393	0.0557082
hsa-miR-34b-3p	RPS6KB1	p70S6K.R.V_GBL.9014906	0.993103	0.462588
hsa-miR-34b-5p	AKT3	Akt_pS473.R.V_GBL.9014825	0.462195	0.00614623
hsa-miR-34b-5p	CTNNB1	beta.Catenin.R.V_GBL.9014836	0.824388	0.0271619
hsa-miR-34b-5p	ESR1	ER.alpha_pS118.R.V_GBL.9014869	0.915538	0.00718586
hsa-miR-34b-5p	GATA3	GATA3.M.V_GBL.9014953	1.12457	0.0175809
hsa-miR-34b-5p	GSK3B	GSK3alpha.beta_pS21_S9.R.V_GBL.9014876	0.758637	0.0102395
hsa-miR-34b-5p	MAP2K1	MEK1.R.V_GBL.9014890	0.927318	0.0825506
hsa-miR-34b-5p	MAPK1	MAPK_pT202_Y204.R.V_GBL.9014888	1.1529	0.00417621
hsa-miR-34b-5p	MET	c.Met_pY1235.R.C_GBL.9014852	0.713859	0.000693406
hsa-miR-34b-5p	MYC	c.Myc.R.C_GBL.9014853	0.65681	0.000198073
hsa-miR-34b-5p	PEA15	Pea.15.R.V_GBL.9014911	1.09794	0.173279
hsa-miR-34b-5p	RPS6KB1	p70S6K_pT389.R.V_GBL.9014905	0.892261	0.00422775
hsa-miR-34c-5p	BCL2	Bcl.2.M.V_GBL.9014998	0.768557	0.0936665
hsa-miR-34c-5p	ERRFI1	MIG.6.M.V_GBL.9014987	1.01607	0.409281
hsa-miR-34c-5p	GATA3	GATA3.M.V_GBL.9014953	0.899073	0.0295786
hsa-miR-34c-5p	MAP2K1	MEK1.R.V_GBL.9014890	0.595053	0.00100963
hsa-miR-34c-5p	MET	c.Met_pY1235.R.C_GBL.9014852	0.757835	0.00113209
hsa-miR-34c-5p	PEA15	Pea.15.R.V_GBL.9014911	0.920102	0.215255
hsa-miR-365a-3p	AKT3	Akt.R.V_GBL.9014827	0.767593	0.00726518
hsa-miR-365a-3p	CCND1	Cyclin.D1.R.V_GBL.9014859	0.838776	0.0729372
hsa-miR-365a-3p	PTEN	PTEN.R.V_GBL.9014918	1.09105	0.117282
hsa-miR-367-5p	IGF1R	IGF.1R.beta.R.C_GBL.9014883	0.828133	0.000486319
hsa-miR-367-5p	KIT	c.Kit.R.V_GBL.9014850	1.02975	0.467068
hsa-miR-367-5p	PTEN	PTEN.R.V_GBL.9014918	0.974367	0.352135
hsa-miR-372	BCL2L11	Bim.R.V_GBL.9014838	1.15618	0.0217378
hsa-miR-372	CCND1	Cyclin.D1.R.V_GBL.9014859	0.865173	0.10048
hsa-miR-372	FOXO3	FOXO3a.R.C_GBL.9014874	0.889379	0.144336
hsa-miR-372	GSK3B	GSK3.alpha.beta.M.V_GBL.9014954	1.07628	0.0453685
hsa-miR-372	NCOA3	AIB1.M.V_GBL.9014940	1.33472	0.00182067
hsa-miR-372	PARP1	PARP_cleaved.M.C_GBL.9014960	0.970958	0.208545
hsa-miR-372	PECAM1	CD31.M.V_GBL.9014946	0.977011	0.248891
hsa-miR-372	PIK3CA	PI3K.p110.alpha.R.C_GBL.9014912	0.79372	0.0283721
hsa-miR-372	PTEN	PTEN.R.V_GBL.9014918	0.869185	0.0614117
hsa-miR-372	RPS6KA1	p90RSK_pT359_S363.R.C_GBL.9014907	1.03019	0.329293
hsa-miR-373-3p	BCL2L11	Bim.R.V_GBL.9014838	1.49201	0.00089442
hsa-miR-373-3p	ESR1	ER.alpha.R.V_GBL.9014870	0.917885	0.388411
hsa-miR-373-3p	PECAM1	CD31.M.V_GBL.9014946	0.973713	0.221925
hsa-miR-373-3p	PIK3CA	PI3K.p110.alpha.R.C_GBL.9014912	0.744694	0.0166932
hsa-miR-373-3p	PTEN	PTEN.R.V_GBL.9014918	0.900702	0.102042
hsa-miR-374a-3p	IGF1R	IGF.1R.beta.R.C_GBL.9014883	1.01263	0.204207
hsa-miR-374a-3p	MAPK9	JNK2.R.C_GBL.9014886	0.995002	0.486628
hsa-miR-374a-3p	MSH6	MSH6.R.C_GBL.9014892	0.965479	0.20288
hsa-miR-374a-3p	PRKAA1	AMPK.alpha.R.C_GBL.9014828	0.994559	0.481111
hsa-miR-374a-3p	TP53BP1	X53BP1.R.C_GBL.9014822	0.982532	0.403575
hsa-miR-374a-3p	VASP	VASP.R.C_GBL.9014877	1.02465	0.364013
hsa-miR-421	ACACA	ACC1.R.C_GBL.9014824	0.684542	0.00150393
hsa-miR-421	AKT3	Akt_pS473.R.V_GBL.9014825	0.423633	0.0050663
hsa-miR-421	FOXO3	FOXO3A_pS318_S321.R.C_GBL.9014873	0.944315	0.299197
hsa-miR-421	GATA3	GATA3.M.V_GBL.9014953	1.01477	0.346691
hsa-miR-421	IRS1	IRS1.R.V_GBL.9014885	0.868266	0.00344772
hsa-miR-421	PECAM1	CD31.M.V_GBL.9014946	1.06957	0.051176
hsa-miR-421	PTEN	PTEN.R.V_GBL.9014918	1.09388	0.111777
hsa-miR-421	RPS6KB1	p70S6K.R.V_GBL.9014906	0.545226	0.00335294
hsa-miR-421	SMAD1	Smad1.R.V_GBL.9014923	0.941182	0.249824
hsa-miR-421	SNAI2	Snail.M.C_GBL.9014965	1.46324	0.0593594
hsa-miR-421	STMN1	Stathmin.R.V_GBL.9014929	1.18502	0.013494
hsa-miR-421	TP53BP1	X53BP1.R.C_GBL.9014822	0.766781	0.0189434
hsa-miR-421	YAP1	YAP_pS127.R.C_GBL.9014935	0.987306	0.430212
hsa-miR-423-5p	CDH2	N.Cadherin.R.V_GBL.9014893	1.07979	0.0783343
hsa-miR-429	ACACA	ACC1.R.C_GBL.9014824	1.00249	0.474204
hsa-miR-429	AKT2	Akt_pT308.R.V_GBL.9014971	0.775883	0.314122
hsa-miR-429	CDKN1B	p27.R.V_GBL.9014980	0.845883	0.0800198
hsa-miR-429	ERRFI1	MIG.6.M.V_GBL.9014987	0.836991	0.0424304
hsa-miR-429	FN1	Fibronectin.R.C_GBL.9014872	0.635403	0.0177117
hsa-miR-429	IRS1	IRS1.R.V_GBL.9014885	0.944951	0.0343867
hsa-miR-429	JUN	c.Jun_pS73.R.C_GBL.9014849	1.02804	0.3137
hsa-miR-429	KDR	VEGFR2.R.V_GBL.9014932	1.25949	0.0593696
hsa-miR-429	NCOA3	AIB1.M.V_GBL.9014940	0.906257	0.0510927
hsa-miR-429	NOTCH1	Notch1.R.V_GBL.9014896	0.929247	0.123441
hsa-miR-429	PRKCA	PKC.alpha.M.V_GBL.9014962	0.828318	0.0221614
hsa-miR-429	PTCH1	PTCH.R.C_GBL.9014917	1.09387	0.0355023
hsa-miR-429	PTEN	PTEN.R.V_GBL.9014918	1.17842	0.0310668
hsa-miR-429	RPS6KB1	p70S6K.R.V_GBL.9014906	0.813954	0.0353098
hsa-miR-429	SMAD4	Smad4.M.V_GBL.9014964	0.962516	0.234829
hsa-miR-429	SNAI2	Snail.M.C_GBL.9014965	1.38301	0.0855034
hsa-miR-429	XIAP	XIAP.R.C_GBL.9014933	0.851033	0.042367
hsa-miR-432-3p	ESR1	ER.alpha.R.V_GBL.9014870	0.782063	0.235453
hsa-miR-432-3p	PTK2	FAK.R.C_GBL.9014871	0.754095	0.00105381
hsa-miR-432-3p	YBX1	YB.1_pS102.R.V_GBL.9014934	0.716083	0.0470489
hsa-miR-454-3p	AR	AR.R.V_GBL.9014831	0.897326	0.0731575
hsa-miR-454-3p	BCL2L11	Bim.R.V_GBL.9014838	1.13079	0.0333577
hsa-miR-454-3p	CDKN1A	p21.R.C_GBL.9014898	1.06891	0.153742
hsa-miR-454-3p	CDKN1B	p27_pT157.R.C_GBL.9014899	0.995771	0.475789
hsa-miR-454-3p	ERBB3	HER3.R.V_GBL.9014881	0.862889	0.06887
hsa-miR-454-3p	ESR1	ER.alpha.R.V_GBL.9014870	0.919851	0.390977
hsa-miR-454-3p	GSK3B	GSK3.alpha.beta.M.V_GBL.9014954	0.984408	0.324735
hsa-miR-454-3p	KIT	c.Kit.R.V_GBL.9014850	0.75942	0.260234
hsa-miR-454-3p	MAPK1	MAPK_pT202_Y204.R.V_GBL.9014888	1.02441	0.196742
hsa-miR-454-3p	MAPK9	JNK2.R.C_GBL.9014886	1.0209	0.444345
hsa-miR-454-3p	MET	c.Met_pY1235.R.C_GBL.9014852	0.802922	0.00206196
hsa-miR-454-3p	PRKAA1	AMPK_pT172.R.V_GBL.9014829	0.752616	0.00150476
hsa-miR-454-3p	PTEN	PTEN.R.V_GBL.9014918	1.13175	0.0605326
hsa-miR-454-3p	RPS6KB1	p70S6K.R.V_GBL.9014906	1.08357	0.152177
hsa-miR-454-3p	YWHAE	X14.3.3_epsilon.M.C_GBL.9014939	0.986137	0.397932
hsa-miR-455-5p	CDKN1B	p27.R.V_GBL.9014937	0.899571	0.194379
hsa-miR-455-5p	GSK3B	GSK3alpha.beta_pS21_S9.R.V_GBL.9014876	0.903656	0.0851274
hsa-miR-455-5p	IGF1R	IGF.1R.beta.R.C_GBL.9014883	1.04627	0.0195724
hsa-miR-455-5p	KDR	VEGFR2.R.V_GBL.9014932	1.10757	0.217564
hsa-miR-455-5p	KIT	c.Kit.R.V_GBL.9014850	0.559575	0.13799
hsa-miR-455-5p	RAF1	C.Raf.R.V_GBL.9014857	0.8799	0.114352
hsa-miR-455-5p	RPS6KB1	p70S6K.R.V_GBL.9014906	0.682516	0.00912965
hsa-miR-483-3p	CTNNB1	beta.Catenin.R.V_GBL.9014836	0.932918	0.162411
hsa-miR-483-3p	FN1	Fibronectin.R.C_GBL.9014872	0.933793	0.277276
hsa-miR-486-3p	DVL3	Dvl3.R.V_GBL.9014861	0.857154	0.120669
hsa-miR-486-3p	GSK3A	GSK3alpha.beta_pS21_S9.R.V_GBL.9014876	0.839986	0.0292063
hsa-miR-486-3p	JUN	c.Jun_pS73.R.C_GBL.9014849	1.19901	0.0157321
hsa-miR-486-3p	MAPK3	MAPK_pT202_Y204.R.V_GBL.9014888	0.933094	0.0361336
hsa-miR-486-3p	RAB25	Rab25.R.C_GBL.9014919	0.976861	0.390541
hsa-miR-486-3p	YWHAE	X14.3.3_epsilon.M.C_GBL.9014939	1.05021	0.190683
hsa-miR-490-5p	CDH2	N.Cadherin.R.V_GBL.9014893	0.867899	0.0263854
hsa-miR-490-5p	PIK3CA	PI3K.p110.alpha.R.C_GBL.9014912	0.896101	0.112768
hsa-miR-490-5p	WWTR1	TAZ_pS89.R.C_GBL.9014930	0.961664	0.30664
hsa-miR-491-3p	BIRC2	cIAP.R.V_GBL.9014848	0.74411	0.0025345
hsa-miR-491-3p	CCND1	Cyclin.D1.R.V_GBL.9014859	0.706047	0.0189039
hsa-miR-491-3p	FOXO3	FOXO3a.R.C_GBL.9014874	0.821382	0.0647055
hsa-miR-491-3p	IGFBP2	IGFBP2.R.V_GBL.9014884	0.944573	0.31081
hsa-miR-491-3p	MYC	c.Myc.R.C_GBL.9014853	0.817183	0.00127342
hsa-miR-491-3p	PRKAA1	AMPK.alpha.R.C_GBL.9014828	0.762345	0.055176
hsa-miR-491-3p	TP53BP1	X53BP1.R.C_GBL.9014822	1.18125	0.0349345
hsa-miR-491-5p	CTNNA1	alpha.Catenin.M.V_GBL.9014941	0.700496	0.312407
hsa-miR-491-5p	VASP	VASP.R.C_GBL.9014877	0.710641	0.0103554
hsa-miR-491-5p	YWHAE	X14.3.3_epsilon.M.C_GBL.9014939	1.13709	0.0340821
hsa-miR-494	BCL2L11	Bim.R.V_GBL.9014838	1.20743	0.0104102
hsa-miR-494	CCND1	Cyclin.D1.R.V_GBL.9014859	0.847073	0.0805281
hsa-miR-494	CDKN1B	p27_pT157.R.C_GBL.9014899	0.983272	0.405566
hsa-miR-494	CTNNB1	beta.Catenin.R.V_GBL.9014836	1.01184	0.424518
hsa-miR-494	IRS1	IRS1.R.V_GBL.9014885	1.57089	4.56299e-05
hsa-miR-494	MAP2K1	MEK1_pS217_S221.R.V_GBL.9014889	0.891183	0.0015154
hsa-miR-494	NCOA3	AIB1.M.V_GBL.9014940	0.918246	0.0675633
hsa-miR-494	PECAM1	CD31.M.V_GBL.9014946	1.04372	0.119856
hsa-miR-494	PIK3R1	PI3K.p85.R.V_GBL.9014913	1.06651	0.056713
hsa-miR-494	PTEN	PTEN.R.V_GBL.9014918	0.746003	0.0128029
hsa-miR-494	RPS6KB1	p70S6K.R.V_GBL.9014906	1.00897	0.451402
hsa-miR-494	SMAD1	Smad1.R.V_GBL.9014923	0.838942	0.0635042
hsa-miR-494	XIAP	XIAP.R.C_GBL.9014933	0.756341	0.012685
hsa-miR-494	YAP1	YAP_pS127.R.C_GBL.9014935	0.992632	0.459274
hsa-miR-494	YBX1	YB.1_pS102.R.V_GBL.9014934	0.868453	0.171847
hsa-miR-494	YWHAE	X14.3.3_epsilon.M.C_GBL.9014939	0.95693	0.222305
hsa-miR-505-3p	CDKN1B	p27_pT198.R.V_GBL.9014900	0.966258	0.410044
hsa-miR-505-3p	CHEK1	Chk1.R.C_GBL.9014846	0.874242	0.0103385
hsa-miR-505-3p	PTK2	FAK.pY397_GBL.9014963	0.910872	0.0422618
hsa-miR-505-3p	YBX1	YB.1_pS102.R.V_GBL.9014934	1.24843	0.0621947
hsa-miR-506-3p	AKT3	Akt_pS473.R.V_GBL.9014825	0.498088	0.00743813
hsa-miR-506-3p	AR	AR.R.V_GBL.9014831	1.20416	0.0151944
hsa-miR-506-3p	BCL2L11	Bim.R.V_GBL.9014838	1.17158	0.0171382
hsa-miR-506-3p	BECN1	Beclin.G.V_GBL.9014969	0.841161	0.0610032
hsa-miR-506-3p	CDH2	N.Cadherin.R.V_GBL.9014893	0.886057	0.0373707
hsa-miR-506-3p	ERBB3	HER3.R.V_GBL.9014881	0.873721	0.0804808
hsa-miR-506-3p	GSK3B	GSK3alpha.beta_pS21_S9.R.V_GBL.9014876	0.946162	0.19468
hsa-miR-506-3p	MAPK1	MAPK_pT202_Y204.R.V_GBL.9014888	1.01325	0.313422
hsa-miR-506-3p	PEA15	Pea.15.R.V_GBL.9014911	0.937504	0.264252
hsa-miR-506-3p	PIK3CA	PI3K.p110.alpha.R.C_GBL.9014912	1.00723	0.461199
hsa-miR-506-3p	RPS6KB1	p70S6K_pT389.R.V_GBL.9014905	0.96824	0.0825392
hsa-miR-506-3p	SMAD4	Smad4.M.V_GBL.9014964	0.948266	0.168677
hsa-miR-506-3p	SNAI2	Snail.M.C_GBL.9014965	1.36692	0.0922443
hsa-miR-506-3p	STAT3	STAT3_pY705.R.V_GBL.9014927	1.09515	0.0988634
hsa-miR-507	AKT3	Akt_pS473.R.V_GBL.9014825	0.443626	0.0055921
hsa-miR-507	BCL2	Bcl.2.M.V_GBL.9014998	1.21514	0.105895
hsa-miR-507	FOXO3	FOXO3A_pS318_S321.R.C_GBL.9014873	0.939536	0.284563
hsa-miR-507	GSK3B	GSK3alpha.beta_pS21_S9.R.V_GBL.9014876	0.818688	0.0215281
hsa-miR-507	PIK3R1	PI3K.p85.R.V_GBL.9014913	1.16575	0.00584464
hsa-miR-507	RPS6KB1	p70S6K_pT389.R.V_GBL.9014905	0.375371	2.36814e-05
hsa-miR-507	SNAI2	Snail.M.C_GBL.9014965	1.28181	0.139453
hsa-miR-515-3p	CASP7	Caspase.7_cleavedD198.R.C_GBL.9014840	0.792048	0.129841
hsa-miR-515-3p	CDH2	N.Cadherin.R.V_GBL.9014893	0.92186	0.0814207
hsa-miR-515-3p	CDKN1B	p27.R.V_GBL.9014937	0.762763	0.0490258
hsa-miR-515-3p	KIT	c.Kit.R.V_GBL.9014850	1.58675	0.087424
hsa-miR-515-3p	YAP1	YAP_pS127.R.C_GBL.9014935	0.919998	0.157073
hsa-miR-516b-5p	CDKN1B	p27_pT198.R.V_GBL.9014900	0.912338	0.282571
hsa-miR-516b-5p	FOXO3	FOXO3a.R.C_GBL.9014874	0.877553	0.12487
hsa-miR-516b-5p	JUN	c.Jun_pS73.R.C_GBL.9014849	1.60074	0.000697339
hsa-miR-516b-5p	STAT3	STAT3_pY705.R.V_GBL.9014927	0.999208	0.494957
hsa-miR-518a-5p	CTNNB1	beta.Catenin.R.V_GBL.9014836	0.909401	0.105386
hsa-miR-518a-5p	FOXO3	FOXO3a.R.C_GBL.9014874	0.898414	0.161338
hsa-miR-518a-5p	GSK3A	GSK3alpha.beta_pS21_S9.R.V_GBL.9014876	0.916252	0.108139
hsa-miR-518a-5p	GSK3B	GSK3alpha.beta_pS21_S9.R.V_GBL.9014876	0.916252	0.108139
hsa-miR-518a-5p	IGF1R	IGF.1R.beta.R.C_GBL.9014883	1.23697	0.000187375
hsa-miR-518a-5p	PTEN	PTEN.R.V_GBL.9014918	1.19908	0.0238529
hsa-miR-518a-5p	RPS6KB1	p70S6K_pT389.R.V_GBL.9014905	0.91751	0.00886948
hsa-miR-518a-5p	SRC	Src_pY527.R.V_GBL.9014926	0.691473	0.0640096
hsa-miR-518a-5p	STMN1	Stathmin.R.V_GBL.9014929	1.22526	0.00795709
hsa-miR-518a-5p	YWHAE	X14.3.3_epsilon.M.C_GBL.9014939	0.972694	0.308312
hsa-miR-518d-5p	AKT3	Akt_pS473.R.V_GBL.9014825	0.655183	0.0200567
hsa-miR-519d	AKT3	Akt.R.V_GBL.9014827	0.921234	0.0909857
hsa-miR-519d	BCL2L11	Bim.R.V_GBL.9014838	1.15981	0.0205235
hsa-miR-519d	BECN1	Beclin.G.V_GBL.9014969	0.822446	0.0483423
hsa-miR-519d	CCND1	Cyclin.D1.R.V_GBL.9014859	0.803945	0.049044
hsa-miR-519d	CDKN1A	p21.R.C_GBL.9014898	0.829	0.027849
hsa-miR-519d	ESR1	ER.alpha_pS118.R.V_GBL.9014869	0.961317	0.0502495
hsa-miR-519d	IRS1	IRS1.R.V_GBL.9014885	1.08316	0.0122738
hsa-miR-519d	NCOA3	AIB1.M.V_GBL.9014940	0.982363	0.345407
hsa-miR-519d	PIK3R1	PI3K.p85.R.V_GBL.9014913	1.00877	0.39459
hsa-miR-519d	PTEN	PTEN.R.V_GBL.9014918	0.972321	0.341287
hsa-miR-519d	PTK2	FAK.R.C_GBL.9014871	0.968752	0.146046
hsa-miR-519d	RB1	Rb.M.V_GBL.9014952	0.881295	0.0943684
hsa-miR-519d	RPS6KA1	p90RSK_pT359_S363.R.C_GBL.9014907	0.78704	0.0205221
hsa-miR-519d	SMAD1	Smad1.R.V_GBL.9014923	0.811878	0.0458972
hsa-miR-519d	SMAD4	Smad4.M.V_GBL.9014964	0.938163	0.133275
hsa-miR-519d	STAT3	STAT3_pY705.R.V_GBL.9014927	1.14563	0.0429469
hsa-miR-519d	VASP	VASP.R.C_GBL.9014877	0.946943	0.2357
hsa-miR-520b	BCL2L11	Bim.R.V_GBL.9014838	1.14781	0.0249025
hsa-miR-520b	CCND1	Cyclin.D1.R.V_GBL.9014859	0.971739	0.377347
hsa-miR-520b	ESR1	ER.alpha.R.V_GBL.9014870	0.954795	0.43767
hsa-miR-520b	FOXO3	FOXO3a.R.C_GBL.9014874	0.737218	0.0276003
hsa-miR-520b	IGF1R	IGF.1R.beta.R.C_GBL.9014883	0.935079	0.00800845
hsa-miR-520b	NCOA3	AIB1.M.V_GBL.9014940	1.18152	0.0101789
hsa-miR-520b	PECAM1	CD31.M.V_GBL.9014946	0.995588	0.446001
hsa-miR-520b	PIK3CA	PI3K.p110.alpha.R.C_GBL.9014912	0.791429	0.0276292
hsa-miR-520b	PTEN	PTEN.R.V_GBL.9014918	0.870589	0.0627593
hsa-miR-525-3p	GATA3	GATA3.M.V_GBL.9014953	1.00202	0.478204
hsa-miR-526b-3p	AKT3	Akt.R.V_GBL.9014827	0.895708	0.0529141
hsa-miR-526b-3p	BCL2L11	Bim.R.V_GBL.9014838	1.22176	0.00869105
hsa-miR-526b-3p	BECN1	Beclin.G.V_GBL.9014969	0.724988	0.0171051
hsa-miR-526b-3p	CCND1	Cyclin.D1.R.V_GBL.9014859	0.923995	0.212576
hsa-miR-526b-3p	CDKN1A	p21.R.C_GBL.9014898	0.818848	0.0242082
hsa-miR-526b-3p	ESR1	ER.alpha_pS118.R.V_GBL.9014869	0.932906	0.0133614
hsa-miR-526b-3p	NCOA3	AIB1.M.V_GBL.9014940	1.01636	0.355805
hsa-miR-526b-3p	PIK3R1	PI3K.p85.R.V_GBL.9014913	0.878932	0.0136922
hsa-miR-526b-3p	PTK2	FAK.R.C_GBL.9014871	0.857971	0.00511154
hsa-miR-526b-3p	RB1	Rb_pS807_S811.R.V_GBL.9014920	0.894598	0.101778
hsa-miR-526b-3p	SMAD1	Smad1.R.V_GBL.9014923	0.83079	0.0574549
hsa-miR-526b-3p	STAT3	STAT3_pY705.R.V_GBL.9014927	1.11311	0.072412
hsa-miR-539-5p	AKT3	Akt_pS473.R.V_GBL.9014825	0.436517	0.0053973
hsa-miR-539-5p	BCL2L11	Bim.R.V_GBL.9014838	1.76752	0.000240013
hsa-miR-539-5p	CAV1	Caveolin.1.R.V_GBL.9014842	0.864469	0.144237
hsa-miR-539-5p	EGFR	EGFR.R.C_GBL.9014867	0.858618	0.0776954
hsa-miR-539-5p	EIF4E	eIF4E.R.V_GBL.9014868	1.11988	0.128331
hsa-miR-539-5p	ESR1	ER.alpha_pS118.R.V_GBL.9014869	0.967186	0.0702297
hsa-miR-539-5p	FN1	Fibronectin.R.C_GBL.9014872	1.07472	0.254223
hsa-miR-539-5p	FOXO3	FOXO3a.R.C_GBL.9014874	0.823106	0.0659597
hsa-miR-539-5p	MAPK14	p38_MAPK.R.C_GBL.9014902	0.772682	0.0341371
hsa-miR-539-5p	PRKAA1	AMPK.alpha.R.C_GBL.9014828	1.00658	0.477157
hsa-miR-539-5p	PTEN	PTEN.R.V_GBL.9014918	1.20161	0.0231229
hsa-miR-539-5p	RB1	Rb_pS807_S811.R.V_GBL.9014920	0.885082	0.0877097
hsa-miR-539-5p	YBX1	YB.1_pS102.R.V_GBL.9014934	1.16923	0.12237
hsa-miR-542-3p	GSK3B	GSK3.alpha.beta.M.V_GBL.9014954	0.894238	0.0210282
hsa-miR-542-3p	JUN	c.Jun_pS73.R.C_GBL.9014849	1.13562	0.0399536
hsa-miR-542-3p	MAP2K1	MEK1.R.V_GBL.9014890	0.874825	0.0256893
hsa-miR-542-3p	MAPK3	MAPK_pT202_Y204.R.V_GBL.9014888	0.668556	0.000439716
hsa-miR-542-3p	PTEN	PTEN.R.V_GBL.9014918	0.995663	0.474052
hsa-miR-542-3p	RPS6KB1	p70S6K.R.V_GBL.9014906	1.02929	0.347038
hsa-miR-542-3p	VASP	VASP.R.C_GBL.9014877	1.0231	0.372067
hsa-miR-552	AKT3	Akt_pS473.R.V_GBL.9014825	0.433063	0.00530584
hsa-miR-552	CAV1	Caveolin.1.R.V_GBL.9014842	0.454554	0.00698811
hsa-miR-552	IGF1R	IGF.1R.beta.R.C_GBL.9014883	0.965599	0.0397985
hsa-miR-552	MAPK9	JNK2.R.C_GBL.9014886	1.04033	0.394078
hsa-miR-552	RPS6KB1	p70S6K.R.V_GBL.9014906	0.667868	0.00807485
hsa-miR-552	SMAD3	Smad3.R.V_GBL.9014924	0.854217	0.0481338
hsa-miR-552	YBX1	YB.1_pS102.R.V_GBL.9014934	1.47859	0.0132886
hsa-miR-555	PTEN	PTEN.R.V_GBL.9014918	1.27777	0.0100864
hsa-miR-561-3p	AKT1	Akt_pS473.R.V_GBL.9014825	0.398953	0.00450307
hsa-miR-561-3p	AKT3	Akt_pS473.R.V_GBL.9014825	0.398953	0.00450307
hsa-miR-561-3p	BCL2L11	Bim.R.V_GBL.9014838	1.11945	0.0410333
hsa-miR-561-3p	CDKN1B	p27_pT198.R.V_GBL.9014900	0.895922	0.249923
hsa-miR-561-3p	CHEK1	Chk1_pS345.R.C_GBL.9014845	0.958088	0.268377
hsa-miR-561-3p	CTNNB1	beta.Catenin.R.V_GBL.9014836	0.927277	0.146257
hsa-miR-561-3p	GSK3B	GSK3.alpha.beta.M.V_GBL.9014954	0.971578	0.213334
hsa-miR-561-3p	KIT	c.Kit.R.V_GBL.9014850	1.23374	0.265765
hsa-miR-561-3p	MAPK14	p38_MAPK.R.C_GBL.9014902	0.838133	0.0704451
hsa-miR-561-3p	MSH6	MSH6.R.C_GBL.9014892	0.921563	0.0579937
hsa-miR-561-3p	MYC	c.Myc.R.C_GBL.9014853	1.09512	0.00816348
hsa-miR-561-3p	PIK3CA	PI3K.p110.alpha.R.C_GBL.9014912	0.943797	0.235434
hsa-miR-561-3p	PRKCA	PKC.alpha.M.V_GBL.9014962	0.879359	0.0502265
hsa-miR-561-3p	PTEN	PTEN.R.V_GBL.9014918	1.05353	0.223617
hsa-miR-561-3p	RPS6KB1	p70S6K_pT389.R.V_GBL.9014905	0.81121	0.000834553
hsa-miR-561-3p	YBX1	YB.1_pS102.R.V_GBL.9014934	1.23616	0.0687498
hsa-miR-567	CDH2	N.Cadherin.R.V_GBL.9014893	0.950077	0.162154
hsa-miR-567	EIF4E	eIF4E.R.V_GBL.9014868	0.909631	0.184722
hsa-miR-567	GATA3	GATA3.M.V_GBL.9014953	0.994337	0.439164
hsa-miR-567	GSK3B	GSK3.alpha.beta.M.V_GBL.9014954	0.853555	0.00897544
hsa-miR-567	PTEN	PTEN.R.V_GBL.9014918	1.04066	0.277476
hsa-miR-570-3p	BECN1	Beclin.G.V_GBL.9014969	1.03324	0.342418
hsa-miR-570-3p	CDH2	N.Cadherin.R.V_GBL.9014893	1.06556	0.110047
hsa-miR-570-3p	CDKN1B	p27.R.V_GBL.9014937	0.804136	0.0723636
hsa-miR-570-3p	CTNNB1	beta.Catenin.R.V_GBL.9014836	0.891102	0.0762743
hsa-miR-570-3p	ERRFI1	MIG.6.M.V_GBL.9014957	1.11536	0.0208388
hsa-miR-570-3p	FOXO3	FOXO3a.R.C_GBL.9014874	0.772618	0.038707
hsa-miR-570-3p	GSK3B	GSK3.alpha.beta.M.V_GBL.9014954	0.967724	0.187079
hsa-miR-570-3p	IRS1	IRS1.R.V_GBL.9014885	0.812656	0.00124655
hsa-miR-570-3p	MET	c.Met.M.C_GBL.9014985	0.925675	0.0935299
hsa-miR-570-3p	PCNA	PCNA.M.V_GBL.9014961	0.858863	0.159178
hsa-miR-570-3p	PEA15	Pea.15.R.V_GBL.9014911	0.93419	0.254259
hsa-miR-570-3p	PTCH1	PTCH.R.C_GBL.9014917	1.22622	0.00351531
hsa-miR-570-3p	PTEN	PTEN.R.V_GBL.9014918	1.02707	0.344481
hsa-miR-570-3p	RPS6KB1	p70S6K.R.V_GBL.9014906	0.789552	0.0263783
hsa-miR-570-3p	SMAD1	Smad1.R.V_GBL.9014923	0.887967	0.120427
hsa-miR-570-3p	SMAD4	Smad4.M.V_GBL.9014964	0.976157	0.317945
hsa-miR-570-3p	YWHAE	X14.3.3_epsilon.M.C_GBL.9014939	0.937237	0.145373
hsa-miR-582-5p	CDH2	N.Cadherin.R.V_GBL.9014893	0.969503	0.262152
hsa-miR-582-5p	GSK3B	GSK3alpha.beta_pS21_S9.R.V_GBL.9014876	0.816807	0.0209799
hsa-miR-582-5p	KIT	c.Kit.R.V_GBL.9014850	1.41115	0.151504
hsa-miR-582-5p	MET	c.Met_pY1235.R.C_GBL.9014852	0.894925	0.0119482
hsa-miR-582-5p	NOTCH1	Notch1.R.V_GBL.9014896	1.05601	0.169326
hsa-miR-582-5p	PTCH1	PTCH.R.C_GBL.9014917	1.11859	0.0201967
hsa-miR-582-5p	PTEN	PTEN.R.V_GBL.9014918	0.961713	0.288465
hsa-miR-582-5p	PTK2	FAK.R.C_GBL.9014871	0.918675	0.022556
hsa-miR-582-5p	RB1	Rb_pS807_S811.R.V_GBL.9014920	0.812757	0.0317941
hsa-miR-582-5p	SMAD1	Smad1.R.V_GBL.9014923	0.886257	0.117661
hsa-miR-582-5p	STMN1	Stathmin.R.V_GBL.9014929	0.980991	0.352419
hsa-miR-584-5p	GATA3	GATA3.M.V_GBL.9014953	1.07757	0.0534098
hsa-miR-584-5p	PIK3CA	PI3K.p110.alpha.R.C_GBL.9014912	0.684211	0.00952281
hsa-miR-584-5p	PRKAA1	AMPK.alpha.R.C_GBL.9014828	0.814625	0.0890441
hsa-miR-584-5p	PTEN	PTEN.R.V_GBL.9014918	0.924528	0.153209
hsa-miR-584-5p	RPS6KB1	p70S6K.R.V_GBL.9014906	0.995158	0.473706
hsa-miR-584-5p	WWTR1	TAZ_pS89.R.C_GBL.9014930	0.962669	0.311094
hsa-miR-601	PTK2	FAK.R.C_GBL.9014871	0.864223	0.0057966
hsa-miR-609	MET	c.Met.M.C_GBL.9014985	0.92353	0.0889912
hsa-miR-615-3p	GATA3	GATA3.M.V_GBL.9014953	1.02102	0.290126
hsa-miR-621	MAPK3	MAPK_pT202_Y204.R.V_GBL.9014888	0.923604	0.0264188
hsa-miR-621	MET	c.Met.M.C_GBL.9014985	1.05692	0.141561
hsa-miR-621	YAP1	YAP_pS127.R.C_GBL.9014935	0.93725	0.206928
hsa-miR-624-5p	AKT3	Akt_pS473.R.V_GBL.9014825	0.509806	0.00793577
hsa-miR-624-5p	CDH2	N.Cadherin.R.V_GBL.9014893	0.938132	0.12048
hsa-miR-624-5p	CTNNB1	beta.Catenin.R.V_GBL.9014836	0.927743	0.147528
hsa-miR-624-5p	GSK3B	GSK3alpha.beta_pS21_S9.R.V_GBL.9014876	0.646584	0.00355479
hsa-miR-624-5p	MAP2K1	MEK1.R.V_GBL.9014890	0.668599	0.00181177
hsa-miR-624-5p	MET	c.Met_pY1235.R.C_GBL.9014852	0.767999	0.0012833
hsa-miR-624-5p	PTGS2	COX.2.R.C_GBL.9014979	0.96463	0.344656
hsa-miR-624-5p	SMAD3	Smad3.R.V_GBL.9014924	0.919673	0.139272
hsa-miR-624-5p	WWTR1	TAZ_pS89.R.C_GBL.9014930	1.0622	0.214495
hsa-miR-625-5p	AKT3	Akt_pS473.R.V_GBL.9014825	0.813566	0.0783115
hsa-miR-625-5p	BCL2L11	Bim.R.V_GBL.9014838	0.951383	0.18573
hsa-miR-625-5p	CDH2	N.Cadherin.R.V_GBL.9014893	0.928548	0.0954215
hsa-miR-625-5p	CDH3	P.Cadherin.R.C_GBL.9014909	0.990131	0.462853
hsa-miR-625-5p	CTNNA1	alpha.Catenin.M.V_GBL.9014941	0.707925	0.31653
hsa-miR-625-5p	STAT3	STAT3_pY705.R.V_GBL.9014927	0.905127	0.0993496
hsa-miR-625-5p	YWHAE	X14.3.3_epsilon.M.C_GBL.9014939	0.76404	0.00855622
hsa-miR-629-3p	AKT3	Akt_pS473.R.V_GBL.9014825	0.823569	0.0865962
hsa-miR-629-3p	CDH2	N.Cadherin.R.V_GBL.9014893	0.982788	0.356128
hsa-miR-629-3p	ERRFI1	MIG.6.M.V_GBL.9014957	1.05016	0.116569
hsa-miR-629-3p	MAPK14	p38_MAPK.R.C_GBL.9014902	0.678183	0.0144393
hsa-miR-629-3p	PTCH1	PTCH.R.C_GBL.9014917	1.12444	0.0178776
hsa-miR-629-3p	STMN1	Stathmin.R.V_GBL.9014929	0.893117	0.0504407
hsa-miR-636	KIT	c.Kit.R.V_GBL.9014850	0.970536	0.467387
hsa-miR-636	SNAI2	Snail.M.C_GBL.9014965	1.01045	0.48204
hsa-miR-636	YBX1	YB.1_pS102.R.V_GBL.9014934	0.998766	0.496132
hsa-miR-637	JUN	c.Jun_pS73.R.C_GBL.9014849	0.983112	0.383397
hsa-miR-647	DVL3	Dvl3.R.V_GBL.9014861	0.822777	0.0842672
hsa-miR-647	PRKAA1	AMPK.alpha.R.C_GBL.9014828	0.953602	0.345345
hsa-miR-653	CDH2	N.Cadherin.R.V_GBL.9014893	1.16648	0.014735
hsa-miR-653	MAPT	Tau.M.C_GBL.9014968	1.15782	0.0319884
hsa-miR-653	PTEN	PTEN.R.V_GBL.9014918	0.789976	0.0208862
hsa-miR-653	RPS6KB1	p70S6K.R.V_GBL.9014906	0.952055	0.264667
hsa-miR-653	YBX1	YB.1_pS102.R.V_GBL.9014934	0.768939	0.0717119
hsa-miR-653	YWHAE	X14.3.3_epsilon.M.C_GBL.9014939	0.945115	0.17237
hsa-miR-654-3p	AKT3	Akt_pS473.R.V_GBL.9014825	0.389726	0.00431368
hsa-miR-654-3p	BCL2L11	Bim.R.V_GBL.9014838	1.1732	0.0167292
hsa-miR-665	ERBB3	HER3_pY1298.R.C_GBL.9014880	1.25859	0.00450359
hsa-miR-665	KDR	VEGFR2.R.V_GBL.9014932	0.937684	0.319339
hsa-miR-665	SNAI2	Snail.M.C_GBL.9014965	1.74024	0.0202634
hsa-miR-675-5p	CCNB1	Cyclin.B1.R.V_GBL.9014858	0.762238	0.00751108
hsa-miR-7-5p	BCL2L1	Bcl.xL.R.V_GBL.9014834	0.884617	0.126685
hsa-miR-7-5p	CLDN7	Claudin.7.R.V_GBL.9014851	1.00816	0.427537
hsa-miR-7-5p	EGFR	EGFR.R.C_GBL.9014867	0.912632	0.163772
hsa-miR-7-5p	EIF4E	eIF4E.R.V_GBL.9014868	1.09966	0.16467
hsa-miR-7-5p	GSK3B	GSK3alpha.beta_pS21_S9.R.V_GBL.9014876	0.992607	0.449543
hsa-miR-7-5p	IGF1R	IGF.1R.beta.R.C_GBL.9014883	1.08636	0.00360899
hsa-miR-7-5p	IRS1	IRS1.R.V_GBL.9014885	0.769642	0.000679469
hsa-miR-7-5p	MAPK3	MAPK_pT202_Y204.R.V_GBL.9014888	0.9307	0.0333109
hsa-miR-7-5p	NOTCH3	Notch3.R.C_GBL.9014897	0.849167	0.132198
hsa-miR-7-5p	PARP1	PARP_cleaved.M.C_GBL.9014960	0.94268	0.0804794
hsa-miR-7-5p	PTK2	FAK.pY397_GBL.9014963	1.12333	0.0194938
hsa-miR-7-5p	RAF1	C.Raf_pS338.R.C_GBL.9014856	0.986029	0.467564
hsa-miR-7-5p	RB1	Rb_pS807_S811.R.V_GBL.9014920	0.877479	0.078056
hsa-miR-7-5p	RPS6KB1	p70S6K.R.V_GBL.9014906	0.986231	0.425819
hsa-miR-7-5p	XIAP	XIAP.R.C_GBL.9014933	0.9717	0.331264
hsa-miR-760	CDKN1B	p27.R.V_GBL.9014980	0.89781	0.152783
hsa-miR-760	MAP2K1	MEK1.R.V_GBL.9014890	0.919186	0.067552
hsa-miR-765	BAX	Bax.R.V_GBL.9014833	0.720662	0.00078845
hsa-miR-765	MAPK14	p38_pT180_Y182.R.V_GBL.9014903	1.06525	0.195194
hsa-miR-765	PTK2	FAK.R.C_GBL.9014871	0.801542	0.00196803
hsa-miR-770-5p	RB1	Rb_pS807_S811.R.V_GBL.9014920	0.996955	0.482802
hsa-miR-770-5p	STMN1	Stathmin.R.V_GBL.9014929	0.777235	0.00820338
hsa-miR-770-5p	YWHAE	X14.3.3_epsilon.M.C_GBL.9014939	0.872404	0.0401554
hsa-miR-874	EIF4EBP1	X4E.BP1.R.V_GBL.9014821	0.692174	0.00559811
hsa-miR-874	GSK3B	GSK3.alpha.beta.M.V_GBL.9014954	0.801264	0.00384068
hsa-miR-876-3p	GSK3B	GSK3alpha.beta_pS21_S9.R.V_GBL.9014876	0.78644	0.0141661
hsa-miR-876-3p	YWHAE	X14.3.3_epsilon.M.C_GBL.9014939	0.993124	0.448708
hsa-miR-885-3p	EGFR	EGFR.R.C_GBL.9014867	0.824787	0.0505955
hsa-miR-891a	ERRFI1	MIG.6.M.V_GBL.9014957	1.03836	0.168703
hsa-miR-891a	SMAD1	Smad1.R.V_GBL.9014923	0.913563	0.171225
hsa-miR-892b	CTNNB1	beta.Catenin.R.V_GBL.9014836	0.881155	0.0644158
hsa-miR-892b	KIT	c.Kit.R.V_GBL.9014850	0.654945	0.187205
hsa-miR-924	FOXO3	FOXO3a.R.C_GBL.9014874	0.843265	0.0829725
hsa-miR-924	PIK3R1	PI3K.p85.R.V_GBL.9014913	0.995448	0.44453
hsa-miR-92a-2-5p	GSK3A	GSK3alpha.beta_pS21_S9.R.V_GBL.9014876	0.933857	0.15262
hsa-miR-92a-2-5p	IRS1	IRS1.R.V_GBL.9014885	0.785165	0.000834406
hsa-miR-92a-2-5p	MAPK3	MAPK_pT202_Y204.R.V_GBL.9014888	0.859909	0.00534094
hsa-miR-92a-2-5p	MET	c.Met_pY1235.R.C_GBL.9014852	1.03789	0.11154
hsa-miR-93-3p	EIF4EBP1	X4E.BP1.R.V_GBL.9014821	0.867626	0.0474094
hsa-miR-93-3p	IRS1	IRS1.R.V_GBL.9014885	0.632266	0.000169699
hsa-miR-93-3p	PIK3CA	PI3K.p110.alpha.R.C_GBL.9014912	1.01971	0.395827
hsa-miR-93-3p	PRKAA1	AMPK.alpha.R.C_GBL.9014828	0.976411	0.418956
hsa-miR-93-3p	STAT3	STAT3_pY705.R.V_GBL.9014927	1.11394	0.0714116
hsa-miR-93-3p	WWTR1	TAZ_pS89.R.C_GBL.9014930	1.00702	0.46224
hsa-miR-938	KIT	c.Kit.R.V_GBL.9014850	1.10294	0.38823
hsa-miR-938	MAPK14	p38_pT180_Y182.R.V_GBL.9014903	0.842759	0.0473571
hsa-miR-938	YBX1	YB.1_pS102.R.V_GBL.9014934	1.14201	0.156326
hsa-miR-9-3p	BAK1	Bak.R.C_GBL.9014832	0.915088	0.0836686
hsa-miR-9-3p	BECN1	Beclin.G.V_GBL.9014969	0.999807	0.499046
hsa-miR-9-3p	CASP7	Caspase.7_cleavedD198.R.C_GBL.9014840	0.717694	0.0781796
hsa-miR-9-3p	CDH2	N.Cadherin.R.V_GBL.9014893	1.08192	0.0745577
hsa-miR-9-3p	FN1	Fibronectin.R.C_GBL.9014872	1.00569	0.47905
hsa-miR-9-3p	IGF1R	IGF.1R.beta.R.C_GBL.9014883	0.913848	0.0036342
hsa-miR-9-3p	MAPK1	MAPK_pT202_Y204.R.V_GBL.9014888	0.652833	0.000383296
hsa-miR-9-3p	PDK1	PDK1_pS241.R.V_GBL.9014910	0.927788	0.203124
hsa-miR-9-3p	PIK3CA	PI3K.p110.alpha.R.C_GBL.9014912	0.88299	0.0925908
hsa-miR-9-3p	PIK3R1	PI3K.p85.R.V_GBL.9014913	0.864996	0.0102515
hsa-miR-9-3p	PTEN	PTEN.R.V_GBL.9014918	0.993404	0.460597
hsa-miR-9-3p	RB1	Rb_pS807_S811.R.V_GBL.9014920	0.7308	0.0128021
hsa-miR-9-3p	RPS6KB1	p70S6K.R.V_GBL.9014906	1.01045	0.44347
hsa-miR-9-3p	SMAD1	Smad1.R.V_GBL.9014923	0.911513	0.166441
hsa-miR-9-3p	SNAI2	Snail.M.C_GBL.9014965	1.19871	0.210521
hsa-miR-9-3p	WWTR1	TAZ_pS89.R.C_GBL.9014930	0.95068	0.260916
hsa-miR-942	AKT3	Akt_pS473.R.V_GBL.9014825	0.655926	0.0201658
hsa-miR-942	CHEK1	Chk1.R.C_GBL.9014975	0.824495	0.271893
hsa-miR-942	EIF4E	eIF4E.R.V_GBL.9014868	0.95692	0.325024
hsa-miR-942	GSK3B	GSK3.alpha.beta.M.V_GBL.9014954	0.959984	0.14354

## Sheet: Step III (Gene)
Gene Symbol	Antibody	Num Pred MiR	Mock Average	Pred MiR Average	Fold Change (Pred MiR/Mock)	S.E.M.	Pval (one-tail)
ACACA	ACC_pS79.R.V_GBL.9014843	4	0.23105	0.23557	1.01959	0.07813	0.412343
ACACA	ACC1.R.C_GBL.9014824	4	1.53394	1.40272	0.91446	0.07678	0.158561
AKT2	Akt.R.V_GBL.9014827	1	0.74336	0.62729	0.84387	0	0.0207644
AKT2	Akt_pS473.R.V_GBL.9014825	1	0.03431	0.03517	1.025	0	0.408589
AKT2	Akt_pT308.R.V_GBL.9014971	1	0.07526	0.0584	0.77588	0	0.314122
AKT3	Akt.R.V_GBL.9014827	37	0.74336	0.72865	0.98022	0.01748	0.358272
AKT3	Akt_pS473.R.V_GBL.9014825	37	0.03431	0.0214	0.62361	0.03523	0.000683083
AKT3	Akt_pT308.R.V_GBL.9014971	37	0.07526	0.08312	1.10436	0.054	0.276974
AR	AR.R.V_GBL.9014831	4	0.01777	0.01802	1.01426	0.07379	0.430013
BAK1	Bak.R.C_GBL.9014832	5	0.19321	0.17293	0.89506	0.03101	0.0165978
BAX	Bax.R.V_GBL.9014833	1	0.44424	0.46194	1.03984	0	0.106163
BCL2	Bcl.2.M.V_GBL.9014998	8	0.03273	0.0307	0.93782	0.07619	0.304416
BCL2L1	Bcl.X.R.V_GBL.9014835	3	0.33049	0.2878	0.87084	0.00382	0.00159105
BCL2L1	Bcl.xL.R.V_GBL.9014834	3	0.19372	0.1666	0.86002	0.01999	0.0147896
BCL2L11	Bim.R.V_GBL.9014838	27	0.10071	0.12047	1.19626	0.03128	0.0122956
BECN1	Beclin.G.V_GBL.9014969	17	0.09758	0.09321	0.95521	0.03047	0.25189
CASP3	Caspase.3_active.R.C_GBL.9014991	3	0.0091	0.01038	1.13998	0.06925	0.0687352
CASP7	Caspase.7_cleavedD198.R.C_GBL.9014840	3	0.00845	0.00695	0.82188	0.06409	0.0610142
CASP7	Caspase.7_cleavedD198.R.C_GBL.9014992	3	0.00583	0.00692	1.18582	0.17412	0.136682
CAV1	Caveolin.1.R.V_GBL.9014842	9	2.30755	1.95255	0.84616	0.12072	0.215208
CCNB1	Cyclin.B1.R.V_GBL.9014858	1	0.78109	0.28197	0.361	0	0.000433951
CCND1	Cyclin.D1.R.V_GBL.9014859	15	0.18727	0.16684	0.89092	0.0213	0.0142939
CCNE1	Cyclin_E1.M.V_GBL.9014950	6	0.10333	0.09297	0.89973	0.06737	0.138383
CCNE1	Cyclin_E1.M.V_GBL.9014986	6	0.10068	0.09349	0.92852	0.05236	0.156615
CDH2	N.Cadherin.R.V_GBL.9014893	18	0.0674	0.06909	1.02499	0.02035	0.291295
CDK1	CDK1.R.V_GBL.9014844	2	0.27518	0.26945	0.9792	0.17197	0.441982
CDK1	CDK1.R.V_GBL.9014947	2	0.14366	0.1306	0.90909	0.04264	0.0391603
CDKN1A	p21.R.C_GBL.9014898	10	0.23993	0.21687	0.90388	0.03349	0.0566424
CDKN1B	p27.R.V_GBL.9014937	15	0.0826	0.08233	0.99669	0.0549	0.488232
CDKN1B	p27.R.V_GBL.9014980	15	0.00575	0.00635	1.1057	0.06432	0.210914
CDKN1B	p27.R.V_GBL.9014994	15	0.0553	0.0636	1.15011	0.06993	0.147761
CDKN1B	p27_pT157.R.C_GBL.9014899	15	2.71582e+08	2.51057e+08	0.92443	0.06957	0.295882
CDKN1B	p27_pT198.R.V_GBL.9014900	15	0.15863	0.16777	1.05761	0.03371	0.219237
CHEK1	Chk1.R.C_GBL.9014846	4	0.2641	0.2566	0.9716	0.03712	0.24792
CHEK1	Chk1.R.C_GBL.9014975	4	0.06794	0.06567	0.96662	0.06338	0.403895
CHEK1	Chk1_pS345.R.C_GBL.9014845	4	0.13569	0.12607	0.92904	0.01474	0.0301253
CTNNA1	alpha.Catenin.M.V_GBL.9014941	3	0.32942	0.22836	0.6932	0.00962	0.170696
CTNNA1	alpha.Catenin.M.V_GBL.9014983	3	0.19028	0.18407	0.96735	0.01188	0.265989
CTNNB1	beta.Catenin.R.V_GBL.9014836	16	0.72585	0.67466	0.92947	0.03369	0.162674
DVL3	Dvl3.R.V_GBL.9014861	3	0.13826	0.13093	0.94698	0.03013	0.200172
EEF2K	eEF2K.R.V_GBL.9014863	1	0.114	0.08187	0.7181	0	0.00298127
EIF4E	eIF4E.R.V_GBL.9014868	7	0.56513	0.55864	0.98852	0.03938	0.426371
EIF4EBP1	X4E.BP1.R.V_GBL.9014821	1	0.30792	0.30558	0.99239	0	0.449244
EIF4EBP1	X4E.BP1_pS65.R.V_GBL.9014938	1	0.10452	0.10833	1.03649	0	0.183611
EIF4EBP1	X4EBP1_pT37.R.V_GBL.9014820	1	0.3788	0.31284	0.82587	0	0.0174469
ERBB3	HER3.R.V_GBL.9014881	12	0.04516	0.04967	1.09977	0.11171	0.311695
ERBB3	HER3_pY1298.R.C_GBL.9014880	12	0.0639	0.06735	1.05403	0.0516	0.283262
ERRFI1	MIG.6.M.V_GBL.9014957	11	0.04674	0.0443	0.94785	0.04579	0.258338
ERRFI1	MIG.6.M.V_GBL.9014987	11	0.85056	0.81941	0.96338	0.04898	0.336344
ESR1	ER.alpha.R.V_GBL.9014870	23	0.00204	0.00196	0.96338	0.06291	0.410219
ESR1	ER.alpha_pS118.R.V_GBL.9014869	23	0.28474	0.28663	1.00666	0.01265	0.415676
FN1	Fibronectin.R.C_GBL.9014872	7	0.56659	0.57593	1.01647	0.11655	0.4604
FOXO3	FOXO3a.R.C_GBL.9014874	10	0.05465	0.04662	0.85315	0.03557	0.0177063
FOXO3	FOXO3A_pS318_S321.R.C_GBL.9014873	10	0.26123	0.23358	0.89415	0.02285	0.0177982
GAB2	GAB2.R.V_GBL.9014875	3	0.36723	0.20156	0.54888	0.01411	7.81109e-07
GATA3	GATA3.M.V_GBL.9014953	9	0.1104	0.10736	0.97249	0.03778	0.324693
GSK3B	GSK3.alpha.beta.M.V_GBL.9014954	36	0.63645	0.58685	0.92206	0.01714	0.0717228
GSK3B	GSK3alpha.beta_pS21_S9.R.V_GBL.9014876	36	0.43924	0.40431	0.92048	0.02213	0.123166
IGF1R	IGF.1R.beta.R.C_GBL.9014883	11	0.21396	0.20382	0.95262	0.0271	0.161629
IRS1	IRS1.R.V_GBL.9014885	11	0.2258	0.19044	0.84342	0.03244	0.00709372
KDR	VEGFR2.R.V_GBL.9014932	5	1.90361	2.07397	1.0895	0.05462	0.143794
KIT	c.Kit.R.V_GBL.9014850	16	0.00332	0.00311	0.93561	0.04493	0.289553
MAP2K1	MEK1.R.V_GBL.9014890	11	0.62277	0.52482	0.84272	0.04429	0.0293299
MAP2K1	MEK1_pS217_S221.R.V_GBL.9014889	11	0.87252	0.92522	1.0604	0.03056	0.133157
MAPK1	MAPK_pT202_Y204.R.V_GBL.9014888	8	0.1941	0.17097	0.88081	0.04088	0.0368961
MAPK14	p38_MAPK.R.C_GBL.9014902	6	0.90519	0.70797	0.78213	0.07234	0.0253951
MAPK14	p38_pT180_Y182.R.V_GBL.9014903	6	0.25298	0.21254	0.84012	0.13432	0.186541
MAPK3	MAPK_pT202_Y204.R.V_GBL.9014888	1	0.1941	0.14268	0.73509	0	0.000851866
MAPK9	JNK2.R.C_GBL.9014886	10	0.12588	0.11915	0.94655	0.03074	0.201475
MET	c.Met.M.C_GBL.9014985	19	0.09452	0.0961	1.01665	0.03403	0.414309
MET	c.Met_pY1235.R.C_GBL.9014852	19	0.14919	0.12869	0.86256	0.03448	0.0437579
MSH2	MSH2.M.C_GBL.9014958	1	0.17593	0.16329	0.92815	0	0.17213
MYC	c.Myc.R.C_GBL.9014853	5	0.32699	0.2793	0.85414	0.052	0.0219401
NCOA3	AIB1.M.V_GBL.9014940	20	0.30015	0.29977	0.99874	0.03276	0.493387
NFKB1	NF.kB.p65_pS536.R.C_GBL.9014895	1	0.28364	0.2305	0.81267	0	0.00987039
NOTCH1	Notch1.R.V_GBL.9014896	7	0.17711	0.19891	1.12307	0.15394	0.285259
NOTCH3	Notch3.R.C_GBL.9014897	1	0.09813	0.09016	0.91875	0	0.257098
PARP1	PARP_cleaved.M.C_GBL.9014960	2	0.05038	0.0482	0.95682	0.01414	0.0636087
PEA15	Pea.15.R.V_GBL.9014911	4	0.19663	0.20548	1.04501	0.04495	0.23978
PECAM1	CD31.M.V_GBL.9014946	3	0.05646	0.05719	1.01296	0.029	0.336669
PIK3CA	PI3K.p110.alpha.R.C_GBL.9014912	14	0.2149	0.18897	0.87933	0.02243	0.00862799
PIK3R1	PI3K.p85.R.V_GBL.9014913	21	0.85078	0.83496	0.98141	0.01797	0.331911
PRKAA1	AMPK.alpha.R.C_GBL.9014828	12	0.38969	0.34958	0.89709	0.0288	0.0462271
PRKAA1	AMPK_pT172.R.V_GBL.9014829	12	1.11152	1.04391	0.93917	0.04646	0.236904
PRKCA	PKC.alpha.M.V_GBL.9014962	2	0.61868	0.57548	0.93018	0.10186	0.191332
PRKCA	PKC.alpha_pS657.R.V_GBL.9014914	2	0.37125	0.34671	0.9339	0.09335	0.167822
PTCH1	PTCH.R.C_GBL.9014917	12	0.42442	0.42969	1.01242	0.03918	0.430804
PTEN	PTEN.R.V_GBL.9014918	43	0.97215	1.02661	1.05602	0.02631	0.262542
PTGS2	COX.2.R.C_GBL.9014979	2	0.1013	0.09354	0.92342	0.02986	0.124674
PTK2	FAK.pY397_GBL.9014963	17	0.1107	0.11379	1.02798	0.03674	0.361136
PTK2	FAK.R.C_GBL.9014871	17	0.70057	0.6543	0.93394	0.02675	0.128235
PXN	Paxillin.R.V_GBL.9014908	1	0.79067	0.5579	0.7056	0	0.00557059
RAF1	C.Raf.R.V_GBL.9014857	7	0.39504	0.319	0.80751	0.06535	0.0331678
RAF1	C.Raf_pS338.R.C_GBL.9014856	7	0.14632	0.12629	0.8631	0.03235	0.0363011
RB1	Rb.M.V_GBL.9014952	23	0.16017	0.14747	0.92072	0.01211	0.00979255
RB1	Rb_pS807_S811.R.V_GBL.9014920	23	0.98107	0.83224	0.8483	0.0232	0.00712389
RPS6KA1	p90RSK_pT359_S363.R.C_GBL.9014907	7	0.25779	0.23035	0.89356	0.03329	0.0296145
RPS6KB1	p70S6K.R.V_GBL.9014906	33	0.36422	0.31883	0.87538	0.03245	0.0986903
RPS6KB1	p70S6K_pT389.R.V_GBL.9014905	33	0.43416	0.39499	0.90979	0.0341	0.184666
SMAD1	Smad1.R.V_GBL.9014923	20	0.2635	0.22716	0.86209	0.01181	7.72759e-05
SMAD3	Smad3.R.V_GBL.9014924	2	0.2406	0.21165	0.87967	0.04001	0.0324216
SMAD4	Smad4.M.V_GBL.9014964	10	0.16425	0.15775	0.96043	0.01555	0.0908467
SNAI2	Snail.M.C_GBL.9014965	12	0.03156	0.03711	1.17569	0.03899	0.0301152
SRC	Src.M.V_GBL.9014966	1	0.05392	0.05047	0.9359	0	0.261944
SRC	Src_pY416.R.C_GBL.9014925	1	0.1324	0.10741	0.81128	0	0.0288905
SRC	Src_pY527.R.V_GBL.9014926	1	0.61565	0.52924	0.85965	0	0.206127
STAT3	STAT3_pY705.R.V_GBL.9014927	8	0.10155	0.10408	1.02491	0.02271	0.259033
STMN1	Stathmin.R.V_GBL.9014929	2	0.06513	0.06841	1.05032	0.17494	0.337461
TP53	p53.R.V_GBL.9014904	3	0.0832	0.09101	1.09381	0.0286	0.291528
TP53BP1	X53BP1.R.C_GBL.9014822	7	0.72972	0.75025	1.02813	0.05018	0.35094
VASP	VASP.R.C_GBL.9014877	7	0.16371	0.17103	1.04468	0.03689	0.215297
WWTR1	TAZ_pS89.R.C_GBL.9014930	12	0.06393	0.05999	0.93847	0.02776	0.127537
XIAP	XIAP.R.C_GBL.9014933	4	0.1937	0.16337	0.84343	0.04697	0.0134876
YAP1	YAP.R.V_GBL.9014936	7	0.12237	0.12029	0.98299	0.03576	0.376397
YAP1	YAP_pS127.R.C_GBL.9014935	7	0.16893	0.1653	0.97854	0.0328	0.336915
YBX1	YB.1_pS102.R.V_GBL.9014934	11	0.33866	0.33346	0.98465	0.07263	0.452757
YWHAE	X14.3.3_epsilon.M.C_GBL.9014939	15	0.10544	0.10217	0.96897	0.02124	0.241592

## Sheet: Step III (Interaction)
MiRNA	Gene Symbol	Antibody	Fold Change	Pval (one-tail)
hsa-let-7a-3p	BCL2L11	Bim.R.V_GBL.9014838	1.05596	0.157003
hsa-let-7a-3p	CDKN1B	p27.R.V_GBL.9014937	0.990554	0.46531
hsa-let-7a-3p	CTNNB1	beta.Catenin.R.V_GBL.9014836	1.02202	0.362763
hsa-let-7a-3p	GATA3	GATA3.M.V_GBL.9014953	0.798667	0.00481257
hsa-let-7a-3p	GSK3B	GSK3alpha.beta_pS21_S9.R.V_GBL.9014876	0.711891	0.00631247
hsa-let-7a-3p	IGF1R	IGF.1R.beta.R.C_GBL.9014883	0.980956	0.12203
hsa-let-7a-3p	IRS1	IRS1.R.V_GBL.9014885	0.733014	0.000439348
hsa-let-7a-3p	NOTCH3	Notch3.R.C_GBL.9014897	0.91875	0.257098
hsa-let-7a-3p	PRKAA1	AMPK.alpha.R.C_GBL.9014828	0.992302	0.473291
hsa-let-7a-3p	PTCH1	PTCH.R.C_GBL.9014917	0.896708	0.0283564
hsa-let-7a-3p	RPS6KA1	p90RSK_pT359_S363.R.C_GBL.9014907	0.917399	0.136816
hsa-let-7a-3p	RPS6KB1	p70S6K_pT389.R.V_GBL.9014905	0.958474	0.0483927
hsa-let-7a-3p	SMAD4	Smad4.M.V_GBL.9014964	0.897273	0.0543604
hsa-let-7a-3p	TP53BP1	X53BP1.R.C_GBL.9014822	1.06032	0.212672
hsa-let-7a-3p	WWTR1	TAZ_pS89.R.C_GBL.9014930	0.836932	0.0483187
hsa-let-7a-5p	BCL2L1	Bcl.xL.R.V_GBL.9014834	0.824927	0.0609716
hsa-let-7a-5p	CASP3	Caspase.3_active.R.C_GBL.9014991	1.00361	0.486997
hsa-let-7a-5p	CCND1	Cyclin.D1.R.V_GBL.9014859	0.892567	0.142043
hsa-let-7a-5p	DVL3	Dvl3.R.V_GBL.9014861	0.944266	0.304823
hsa-let-7a-5p	EEF2K	eEF2K.R.V_GBL.9014863	0.718105	0.00298127
hsa-let-7a-5p	IGF1R	IGF.1R.beta.R.C_GBL.9014883	0.843958	0.000646924
hsa-let-7a-5p	MYC	c.Myc.R.C_GBL.9014853	0.847756	0.00216715
hsa-let-7a-5p	RB1	Rb_pS807_S811.R.V_GBL.9014920	0.924216	0.164086
hsa-let-7a-5p	TP53	p53.R.V_GBL.9014904	1.08051	0.402566
hsa-let-7d-5p	BCL2L1	Bcl.X.R.V_GBL.9014835	0.877974	0.0377014
hsa-let-7d-5p	CASP3	Caspase.3_active.R.C_GBL.9014991	1.18724	0.0820185
hsa-let-7d-5p	CCND1	Cyclin.D1.R.V_GBL.9014859	0.806991	0.0507129
hsa-let-7d-5p	DVL3	Dvl3.R.V_GBL.9014861	0.896197	0.183803
hsa-let-7d-5p	IGF1R	IGF.1R.beta.R.C_GBL.9014883	0.830984	0.000510987
hsa-let-7d-5p	MAPK9	JNK2.R.C_GBL.9014886	1.03568	0.405914
hsa-let-7d-5p	PTEN	PTEN.R.V_GBL.9014918	1.26063	0.011958
hsa-let-7d-5p	RB1	Rb_pS807_S811.R.V_GBL.9014920	0.935303	0.196598
hsa-let-7d-5p	TP53	p53.R.V_GBL.9014904	1.05229	0.436134
hsa-let-7g-3p	CCNB1	Cyclin.B1.R.V_GBL.9014858	0.360995	0.000433951
hsa-let-7g-3p	EIF4E	eIF4E.R.V_GBL.9014868	0.930436	0.238366
hsa-let-7g-3p	PTEN	PTEN.R.V_GBL.9014918	1.14216	0.0517117
hsa-let-7g-3p	PTK2	FAK.pY397_GBL.9014963	0.653787	0.00110424
hsa-let-7g-3p	RB1	Rb_pS807_S811.R.V_GBL.9014920	0.517332	0.00253142
hsa-let-7g-3p	YWHAE	X14.3.3_epsilon.M.C_GBL.9014939	0.845372	0.0255942
hsa-let-7g-5p	BCL2L1	Bcl.xL.R.V_GBL.9014834	0.860972	0.0939617
hsa-let-7g-5p	CASP3	Caspase.3_active.R.C_GBL.9014991	1.22909	0.0552895
hsa-let-7g-5p	CCND1	Cyclin.D1.R.V_GBL.9014859	0.901289	0.158868
hsa-let-7g-5p	DVL3	Dvl3.R.V_GBL.9014861	1.00048	0.498197
hsa-let-7g-5p	IGF1R	IGF.1R.beta.R.C_GBL.9014883	0.85443	0.000793849
hsa-let-7g-5p	RB1	Rb.M.V_GBL.9014952	0.864728	0.0745077
hsa-let-7g-5p	TP53	p53.R.V_GBL.9014904	1.14864	0.326585
hsa-miR-101-3p	GATA3	GATA3.M.V_GBL.9014953	1.15577	0.0097642
hsa-miR-101-3p	GSK3B	GSK3.alpha.beta.M.V_GBL.9014954	0.828714	0.00583295
hsa-miR-101-3p	MAPK1	MAPK_pT202_Y204.R.V_GBL.9014888	0.872772	0.00697893
hsa-miR-101-3p	MET	c.Met_pY1235.R.C_GBL.9014852	0.739642	0.000915466
hsa-miR-101-3p	PRKAA1	AMPK.alpha.R.C_GBL.9014828	0.828879	0.102134
hsa-miR-101-3p	PTCH1	PTCH.R.C_GBL.9014917	0.849487	0.0108677
hsa-miR-101-3p	PTGS2	COX.2.R.C_GBL.9014979	0.953277	0.300696
hsa-miR-101-3p	SMAD1	Smad1.R.V_GBL.9014923	0.863994	0.0874106
hsa-miR-101-3p	STMN1	Stathmin.R.V_GBL.9014929	0.875377	0.0358893
hsa-miR-101-3p	WWTR1	TAZ_pS89.R.C_GBL.9014930	0.944361	0.237165
hsa-miR-101-5p	RPS6KB1	p70S6K.R.V_GBL.9014906	0.778598	0.0232993
hsa-miR-103a-3p	BECN1	Beclin.G.V_GBL.9014969	0.85112	0.0693549
hsa-miR-103a-3p	CCNE1	Cyclin_E1.M.V_GBL.9014986	0.829853	0.00642806
hsa-miR-103a-3p	CDKN1B	p27_pT198.R.V_GBL.9014900	0.853226	0.179786
hsa-miR-103a-3p	CTNNA1	alpha.Catenin.M.V_GBL.9014941	0.674082	0.298046
hsa-miR-103a-3p	CTNNB1	beta.Catenin.R.V_GBL.9014836	1.04637	0.238074
hsa-miR-103a-3p	PIK3R1	PI3K.p85.R.V_GBL.9014913	0.963258	0.154086
hsa-miR-103a-3p	PTEN	PTEN.R.V_GBL.9014918	1.12458	0.0676757
hsa-miR-106a-5p	AKT3	Akt_pS473.R.V_GBL.9014825	0.709957	0.0306111
hsa-miR-106a-5p	BCL2L11	Bim.R.V_GBL.9014838	1.13363	0.0317183
hsa-miR-106a-5p	BECN1	Beclin.G.V_GBL.9014969	1.19792	0.0380105
hsa-miR-106a-5p	CCND1	Cyclin.D1.R.V_GBL.9014859	0.958931	0.326525
hsa-miR-106a-5p	CDKN1A	p21.R.C_GBL.9014898	1.00186	0.487856
hsa-miR-106a-5p	ESR1	ER.alpha.R.V_GBL.9014870	0.56496	0.09951
hsa-miR-106a-5p	MAP2K1	MEK1.R.V_GBL.9014890	0.992681	0.432869
hsa-miR-106a-5p	NCOA3	AIB1.M.V_GBL.9014940	1.08523	0.062208
hsa-miR-106a-5p	PIK3R1	PI3K.p85.R.V_GBL.9014913	0.987621	0.353833
hsa-miR-106a-5p	PTEN	PTEN.R.V_GBL.9014918	1.18818	0.0273586
hsa-miR-106a-5p	PTK2	FAK.R.C_GBL.9014871	1.06461	0.0389575
hsa-miR-106a-5p	RB1	Rb_pS807_S811.R.V_GBL.9014920	0.923622	0.162501
hsa-miR-106a-5p	RPS6KA1	p90RSK_pT359_S363.R.C_GBL.9014907	0.986666	0.421496
hsa-miR-106a-5p	SMAD1	Smad1.R.V_GBL.9014923	0.846185	0.0695242
hsa-miR-106a-5p	SMAD4	Smad4.M.V_GBL.9014964	0.881297	0.0397111
hsa-miR-106a-5p	SRC	Src_pY416.R.C_GBL.9014925	0.811282	0.0288905
hsa-miR-106a-5p	STAT3	STAT3_pY705.R.V_GBL.9014927	1.02993	0.319935
hsa-miR-106a-5p	VASP	VASP.R.C_GBL.9014877	1.09742	0.11421
hsa-miR-106b-5p	AKT3	Akt_pT308.R.V_GBL.9014971	0.741538	0.289626
hsa-miR-106b-5p	BCL2L11	Bim.R.V_GBL.9014838	1.16003	0.0204522
hsa-miR-106b-5p	BECN1	Beclin.G.V_GBL.9014969	0.975312	0.380724
hsa-miR-106b-5p	CCND1	Cyclin.D1.R.V_GBL.9014859	1.0035	0.484416
hsa-miR-106b-5p	CDKN1A	p21.R.C_GBL.9014898	0.693085	0.00602643
hsa-miR-106b-5p	ESR1	ER.alpha_pS118.R.V_GBL.9014869	1.08432	0.0072191
hsa-miR-106b-5p	MAPK1	MAPK_pT202_Y204.R.V_GBL.9014888	0.958344	0.0941927
hsa-miR-106b-5p	NCOA3	AIB1.M.V_GBL.9014940	0.805391	0.00842964
hsa-miR-106b-5p	PIK3R1	PI3K.p85.R.V_GBL.9014913	1.01271	0.35025
hsa-miR-106b-5p	PTEN	PTEN.R.V_GBL.9014918	1.2327	0.0160917
hsa-miR-106b-5p	PTK2	FAK.R.C_GBL.9014871	0.985281	0.295229
hsa-miR-106b-5p	RB1	Rb.M.V_GBL.9014952	0.915261	0.156517
hsa-miR-106b-5p	RPS6KA1	p90RSK_pT359_S363.R.C_GBL.9014907	0.849753	0.0466032
hsa-miR-106b-5p	SMAD1	Smad1.R.V_GBL.9014923	0.771315	0.029379
hsa-miR-106b-5p	SMAD4	Smad4.M.V_GBL.9014964	0.9761	0.317561
hsa-miR-106b-5p	STAT3	STAT3_pY705.R.V_GBL.9014927	0.994524	0.465191
hsa-miR-106b-5p	VASP	VASP.R.C_GBL.9014877	1.20018	0.0266333
hsa-miR-107	CCNE1	Cyclin_E1.M.V_GBL.9014950	0.662428	0.00297386
hsa-miR-107	CDKN1B	p27_pT198.R.V_GBL.9014900	0.850283	0.175705
hsa-miR-107	CTNNA1	alpha.Catenin.M.V_GBL.9014941	0.700847	0.3126
hsa-miR-107	MAP2K1	MEK1.R.V_GBL.9014890	1.02824	0.264451
hsa-miR-107	PIK3R1	PI3K.p85.R.V_GBL.9014913	0.993011	0.415416
hsa-miR-10b-3p	GSK3B	GSK3.alpha.beta.M.V_GBL.9014954	0.855216	0.00925724
hsa-miR-10b-3p	PTCH1	PTCH.R.C_GBL.9014917	1.06602	0.0745244
hsa-miR-10b-3p	RB1	Rb_pS807_S811.R.V_GBL.9014920	0.835684	0.0428483
hsa-miR-10b-3p	WWTR1	TAZ_pS89.R.C_GBL.9014930	0.882619	0.0918445
hsa-miR-10b-3p	YWHAE	X14.3.3_epsilon.M.C_GBL.9014939	0.95582	0.217096
hsa-miR-1184	BECN1	Beclin.G.V_GBL.9014969	0.911801	0.160235
hsa-miR-1185-5p	SMAD1	Smad1.R.V_GBL.9014923	1.00034	0.498376
hsa-miR-124-3p	AKT3	Akt_pS473.R.V_GBL.9014825	0.65668	0.0202773
hsa-miR-124-3p	AR	AR.R.V_GBL.9014831	1.05824	0.174726
hsa-miR-124-3p	BCL2L11	Bim.R.V_GBL.9014838	1.03879	0.232132
hsa-miR-124-3p	BECN1	Beclin.G.V_GBL.9014969	1.07056	0.206086
hsa-miR-124-3p	CDH2	N.Cadherin.R.V_GBL.9014893	1.05252	0.151956
hsa-miR-124-3p	ERBB3	HER3_pY1298.R.C_GBL.9014880	0.887763	0.0391226
hsa-miR-124-3p	MAPK14	p38_pT180_Y182.R.V_GBL.9014903	0.248641	0.000699831
hsa-miR-124-3p	PEA15	Pea.15.R.V_GBL.9014911	1.08612	0.199805
hsa-miR-124-3p	PIK3CA	PI3K.p110.alpha.R.C_GBL.9014912	0.929337	0.188462
hsa-miR-124-3p	SMAD4	Smad4.M.V_GBL.9014964	1.03395	0.254508
hsa-miR-124-3p	SNAI2	Snail.M.C_GBL.9014965	1.20399	0.205115
hsa-miR-1245a	CAV1	Caveolin.1.R.V_GBL.9014842	0.476042	0.00780418
hsa-miR-1245a	GSK3B	GSK3.alpha.beta.M.V_GBL.9014954	0.66195	0.000824275
hsa-miR-125a-5p	AKT3	Akt_pS473.R.V_GBL.9014825	0.606935	0.014333
hsa-miR-125a-5p	BAK1	Bak.R.C_GBL.9014832	0.996667	0.473863
hsa-miR-125a-5p	EIF4EBP1	X4EBP1_pT37.R.V_GBL.9014820	0.825872	0.0174469
hsa-miR-125a-5p	KIT	c.Kit.R.V_GBL.9014850	1.17386	0.318106
hsa-miR-125b-2-3p	CDH2	N.Cadherin.R.V_GBL.9014893	0.940349	0.127259
hsa-miR-125b-2-3p	GSK3B	GSK3.alpha.beta.M.V_GBL.9014954	0.898732	0.0234233
hsa-miR-125b-2-3p	PTEN	PTEN.R.V_GBL.9014918	1.41624	0.00327539
hsa-miR-125b-2-3p	SNAI2	Snail.M.C_GBL.9014965	1.08421	0.359945
hsa-miR-126-3p	IRS1	IRS1.R.V_GBL.9014885	0.770663	0.000688428
hsa-miR-126-3p	MET	c.Met_pY1235.R.C_GBL.9014852	0.649181	0.000379595
hsa-miR-1285-3p	CAV1	Caveolin.1.R.V_GBL.9014842	0.423971	0.00600843
hsa-miR-1285-3p	PIK3R1	PI3K.p85.R.V_GBL.9014913	1.11184	0.0168216
hsa-miR-1285-3p	YAP1	YAP.R.V_GBL.9014936	0.890885	0.0878724
hsa-miR-129-5p	BECN1	Beclin.G.V_GBL.9014969	1.15719	0.0623016
hsa-miR-129-5p	CDH2	N.Cadherin.R.V_GBL.9014893	1.14856	0.0197338
hsa-miR-129-5p	GSK3B	GSK3alpha.beta_pS21_S9.R.V_GBL.9014876	0.826037	0.0238518
hsa-miR-129-5p	MAPK1	MAPK_pT202_Y204.R.V_GBL.9014888	0.724828	0.000761713
hsa-miR-129-5p	PTCH1	PTCH.R.C_GBL.9014917	1.0782	0.0531204
hsa-miR-129-5p	RPS6KB1	p70S6K.R.V_GBL.9014906	0.371775	0.00131876
hsa-miR-129-5p	SNAI2	Snail.M.C_GBL.9014965	1.14469	0.273458
hsa-miR-129-5p	YBX1	YB.1_pS102.R.V_GBL.9014934	0.727376	0.0513282
hsa-miR-136-3p	AKT3	Akt_pS473.R.V_GBL.9014825	0.698055	0.027811
hsa-miR-136-3p	GSK3B	GSK3alpha.beta_pS21_S9.R.V_GBL.9014876	0.970125	0.308158
hsa-miR-136-3p	MAPK9	JNK2.R.C_GBL.9014886	0.968072	0.415562
hsa-miR-136-5p	BCL2	Bcl.2.M.V_GBL.9014998	1.16584	0.1549
hsa-miR-136-5p	BECN1	Beclin.G.V_GBL.9014969	1.04531	0.29246
hsa-miR-136-5p	CAV1	Caveolin.1.R.V_GBL.9014842	1.13328	0.147539
hsa-miR-136-5p	PIK3CA	PI3K.p110.alpha.R.C_GBL.9014912	0.924472	0.174748
hsa-miR-136-5p	PIK3R1	PI3K.p85.R.V_GBL.9014913	1.02647	0.221342
hsa-miR-145-5p	FN1	Fibronectin.R.C_GBL.9014872	1.58824	0.00487597
hsa-miR-145-5p	IRS1	IRS1.R.V_GBL.9014885	1.00047	0.49133
hsa-miR-145-5p	MAPK9	JNK2.R.C_GBL.9014886	0.910944	0.281455
hsa-miR-145-5p	NCOA3	AIB1.M.V_GBL.9014940	1.01639	0.355582
hsa-miR-145-5p	PTK2	FAK.R.C_GBL.9014871	0.736585	0.000861168
hsa-miR-145-5p	RPS6KB1	p70S6K.R.V_GBL.9014906	0.818053	0.0371619
hsa-miR-145-5p	SMAD1	Smad1.R.V_GBL.9014923	0.844775	0.0683007
hsa-miR-145-5p	SMAD3	Smad3.R.V_GBL.9014924	0.839658	0.039005
hsa-miR-145-5p	TP53BP1	X53BP1.R.C_GBL.9014822	1.11103	0.0944484
hsa-miR-146a-5p	CTNNB1	beta.Catenin.R.V_GBL.9014836	1.22105	0.0152499
hsa-miR-146a-5p	FN1	Fibronectin.R.C_GBL.9014872	1.19074	0.0759942
hsa-miR-146a-5p	IRS1	IRS1.R.V_GBL.9014885	0.969135	0.10824
hsa-miR-146a-5p	SMAD4	Smad4.M.V_GBL.9014964	0.982979	0.366368
hsa-miR-146a-5p	YAP1	YAP_pS127.R.C_GBL.9014935	1.08939	0.135222
hsa-miR-148a-3p	BCL2L11	Bim.R.V_GBL.9014838	1.25093	0.00618824
hsa-miR-148a-3p	CDKN1B	p27.R.V_GBL.9014937	0.82467	0.0887363
hsa-miR-148a-3p	ERBB3	HER3.R.V_GBL.9014881	0.874051	0.0808692
hsa-miR-148a-3p	ERRFI1	MIG.6.M.V_GBL.9014957	0.887986	0.0224267
hsa-miR-148a-3p	ESR1	ER.alpha.R.V_GBL.9014870	0.537536	0.089566
hsa-miR-148a-3p	IRS1	IRS1.R.V_GBL.9014885	0.80797	0.00115969
hsa-miR-148a-3p	KIT	c.Kit.R.V_GBL.9014850	1.08844	0.403451
hsa-miR-148a-3p	MET	c.Met_pY1235.R.C_GBL.9014852	0.845874	0.00416676
hsa-miR-148a-3p	PEA15	Pea.15.R.V_GBL.9014911	0.991006	0.462492
hsa-miR-148a-3p	PIK3CA	PI3K.p110.alpha.R.C_GBL.9014912	0.915983	0.153151
hsa-miR-148a-3p	PIK3R1	PI3K.p85.R.V_GBL.9014913	1.18703	0.0041646
hsa-miR-148a-3p	PRKAA1	AMPK_pT172.R.V_GBL.9014829	0.739187	0.00128979
hsa-miR-148a-3p	PTEN	PTEN.R.V_GBL.9014918	0.910433	0.120268
hsa-miR-148a-3p	RPS6KB1	p70S6K.R.V_GBL.9014906	1.00749	0.459371
hsa-miR-148b-3p	BCL2L11	Bim.R.V_GBL.9014838	1.4135	0.00148745
hsa-miR-148b-3p	CDKN1B	p27.R.V_GBL.9014937	0.738368	0.0395237
hsa-miR-148b-3p	ERBB3	HER3_pY1298.R.C_GBL.9014880	1.02267	0.315955
hsa-miR-148b-3p	IRS1	IRS1.R.V_GBL.9014885	0.774661	0.000725043
hsa-miR-148b-3p	KIT	c.Kit.R.V_GBL.9014850	0.80508	0.298922
hsa-miR-148b-3p	MET	c.Met_pY1235.R.C_GBL.9014852	0.897305	0.0126954
hsa-miR-148b-3p	PIK3CA	PI3K.p110.alpha.R.C_GBL.9014912	0.807827	0.0335412
hsa-miR-148b-3p	PIK3R1	PI3K.p85.R.V_GBL.9014913	0.920482	0.0385001
hsa-miR-148b-3p	PRKAA1	AMPK.alpha.R.C_GBL.9014828	0.704429	0.0341167
hsa-miR-148b-3p	PTEN	PTEN.R.V_GBL.9014918	0.931517	0.172895
hsa-miR-148b-3p	RPS6KB1	p70S6K.R.V_GBL.9014906	0.918204	0.15647
hsa-miR-150-3p	CDH2	N.Cadherin.R.V_GBL.9014893	1.08309	0.0725769
hsa-miR-151a-3p	AKT3	Akt_pS473.R.V_GBL.9014825	0.453195	0.0058691
hsa-miR-151a-3p	PTEN	PTEN.R.V_GBL.9014918	1.30567	0.00777764
hsa-miR-153	AKT3	Akt_pS473.R.V_GBL.9014825	0.572535	0.0114873
hsa-miR-153	CDKN1B	p27.R.V_GBL.9014994	1.004	0.478683
hsa-miR-153	FOXO3	FOXO3a.R.C_GBL.9014874	0.823651	0.066362
hsa-miR-153	IGF1R	IGF.1R.beta.R.C_GBL.9014883	0.960117	0.0282136
hsa-miR-153	MET	c.Met_pY1235.R.C_GBL.9014852	1.12144	0.00808905
hsa-miR-153	PEA15	Pea.15.R.V_GBL.9014911	1.15036	0.0928951
hsa-miR-153	PRKAA1	AMPK.alpha.R.C_GBL.9014828	0.870758	0.154583
hsa-miR-153	PTEN	PTEN.R.V_GBL.9014918	1.22893	0.0167829
hsa-miR-153	RPS6KB1	p70S6K_pT389.R.V_GBL.9014905	0.630311	0.000113639
hsa-miR-153	YBX1	YB.1_pS102.R.V_GBL.9014934	1.04471	0.364208
hsa-miR-15b-5p	ACACA	ACC_pS79.R.V_GBL.9014843	0.827091	0.0491612
hsa-miR-15b-5p	AKT3	Akt_pT308.R.V_GBL.9014971	0.630275	0.220279
hsa-miR-15b-5p	BCL2	Bcl.2.M.V_GBL.9014998	0.825947	0.145295
hsa-miR-15b-5p	CCND1	Cyclin.D1.R.V_GBL.9014859	1.02103	0.407714
hsa-miR-15b-5p	CCNE1	Cyclin_E1.M.V_GBL.9014950	0.788587	0.0109225
hsa-miR-15b-5p	CHEK1	Chk1_pS345.R.C_GBL.9014845	0.891882	0.0853304
hsa-miR-15b-5p	EIF4E	eIF4E.R.V_GBL.9014868	0.815119	0.0600476
hsa-miR-15b-5p	KDR	VEGFR2.R.V_GBL.9014932	1.12947	0.179333
hsa-miR-15b-5p	MAP2K1	MEK1.R.V_GBL.9014890	0.812724	0.00906596
hsa-miR-15b-5p	MAPK9	JNK2.R.C_GBL.9014886	0.766442	0.0937886
hsa-miR-15b-5p	PTCH1	PTCH.R.C_GBL.9014917	0.803604	0.00523983
hsa-miR-15b-5p	RAF1	C.Raf.R.V_GBL.9014857	0.709395	0.0177641
hsa-miR-15b-5p	RPS6KB1	p70S6K.R.V_GBL.9014906	0.939668	0.21895
hsa-miR-15b-5p	YAP1	YAP.R.V_GBL.9014936	0.946393	0.22483
hsa-miR-15b-5p	YWHAE	X14.3.3_epsilon.M.C_GBL.9014939	0.89515	0.0610833
hsa-miR-17-5p	AKT3	Akt_pS473.R.V_GBL.9014825	0.827086	0.0897456
hsa-miR-17-5p	BCL2L11	Bim.R.V_GBL.9014838	1.13028	0.0336625
hsa-miR-17-5p	BECN1	Beclin.G.V_GBL.9014969	0.844394	0.0635763
hsa-miR-17-5p	CCND1	Cyclin.D1.R.V_GBL.9014859	0.771721	0.0349298
hsa-miR-17-5p	CDKN1A	p21.R.C_GBL.9014898	0.95062	0.222066
hsa-miR-17-5p	ESR1	ER.alpha.R.V_GBL.9014870	0.872649	0.331763
hsa-miR-17-5p	MAP2K1	MEK1.R.V_GBL.9014890	0.939156	0.111783
hsa-miR-17-5p	MAPK9	JNK2.R.C_GBL.9014886	0.826896	0.148319
hsa-miR-17-5p	MYC	c.Myc.R.C_GBL.9014853	0.900019	0.00712066
hsa-miR-17-5p	NCOA3	AIB1.M.V_GBL.9014940	0.988967	0.40087
hsa-miR-17-5p	PIK3R1	PI3K.p85.R.V_GBL.9014913	0.974614	0.229854
hsa-miR-17-5p	PTEN	PTEN.R.V_GBL.9014918	1.13055	0.0616601
hsa-miR-17-5p	PTK2	FAK.R.C_GBL.9014871	0.97856	0.223037
hsa-miR-17-5p	RB1	Rb.M.V_GBL.9014952	0.875391	0.0866615
hsa-miR-17-5p	SMAD1	Smad1.R.V_GBL.9014923	0.821052	0.0511118
hsa-miR-17-5p	SMAD4	Smad4.M.V_GBL.9014964	0.94255	0.147595
hsa-miR-17-5p	STAT3	STAT3_pY705.R.V_GBL.9014927	1.0272	0.334756
hsa-miR-17-5p	VASP	VASP.R.C_GBL.9014877	1.01006	0.443056
hsa-miR-181b-5p	AKT3	Akt_pS473.R.V_GBL.9014825	0.581676	0.0121664
hsa-miR-181b-5p	BCL2	Bcl.2.M.V_GBL.9014998	0.859986	0.189477
hsa-miR-181b-5p	CDKN1B	p27_pT157.R.C_GBL.9014899	0.033038	0.000316835
hsa-miR-181b-5p	CTNNA1	alpha.Catenin.M.V_GBL.9014941	0.704674	0.314721
hsa-miR-181b-5p	RPS6KB1	p70S6K.R.V_GBL.9014906	0.991657	0.454791
hsa-miR-181b-5p	SNAI2	Snail.M.C_GBL.9014965	1.06976	0.382779
hsa-miR-181c-3p	ESR1	ER.alpha.R.V_GBL.9014870	0.928885	0.402858
hsa-miR-181c-3p	FOXO3	FOXO3A_pS318_S321.R.C_GBL.9014873	0.831621	0.0869712
hsa-miR-181c-3p	YWHAE	X14.3.3_epsilon.M.C_GBL.9014939	0.97695	0.335253
hsa-miR-18a-3p	CAV1	Caveolin.1.R.V_GBL.9014842	0.703679	0.0335524
hsa-miR-18a-3p	CTNNB1	beta.Catenin.R.V_GBL.9014836	1.02116	0.367769
hsa-miR-18a-3p	ESR1	ER.alpha.R.V_GBL.9014870	0.900859	0.366529
hsa-miR-18a-3p	RPS6KB1	p70S6K.R.V_GBL.9014906	1.01969	0.394934
hsa-miR-18a-3p	SMAD1	Smad1.R.V_GBL.9014923	0.842524	0.0664002
hsa-miR-18a-5p	AKT3	Akt_pS473.R.V_GBL.9014825	0.514506	0.00814758
hsa-miR-18a-5p	CCND1	Cyclin.D1.R.V_GBL.9014859	1.03105	0.365937
hsa-miR-18a-5p	ESR1	ER.alpha_pS118.R.V_GBL.9014869	1.02283	0.129936
hsa-miR-18a-5p	GAB2	GAB2.R.V_GBL.9014875	0.526127	0.000141424
hsa-miR-18a-5p	GSK3B	GSK3alpha.beta_pS21_S9.R.V_GBL.9014876	0.99763	0.48376
hsa-miR-18a-5p	MET	c.Met_pY1235.R.C_GBL.9014852	0.920692	0.0245435
hsa-miR-18a-5p	NCOA3	AIB1.M.V_GBL.9014940	1.14454	0.0184851
hsa-miR-18a-5p	RAF1	C.Raf.R.V_GBL.9014857	0.736414	0.0227074
hsa-miR-18a-5p	RB1	Rb_pS807_S811.R.V_GBL.9014920	0.685984	0.00846885
hsa-miR-18a-5p	TP53BP1	X53BP1.R.C_GBL.9014822	1.08793	0.136172
hsa-miR-18a-5p	WWTR1	TAZ_pS89.R.C_GBL.9014930	0.91937	0.161123
hsa-miR-18a-5p	YAP1	YAP_pS127.R.C_GBL.9014935	0.993102	0.461859
hsa-miR-18a-5p	YBX1	YB.1_pS102.R.V_GBL.9014934	0.757518	0.0652743
hsa-miR-18b-5p	AKT3	Akt_pS473.R.V_GBL.9014825	0.565863	0.0110222
hsa-miR-18b-5p	BCL2L11	Bim.R.V_GBL.9014838	1.30396	0.00360971
hsa-miR-18b-5p	ESR1	ER.alpha.R.V_GBL.9014870	0.731247	0.192483
hsa-miR-18b-5p	GAB2	GAB2.R.V_GBL.9014875	0.5458	0.000160478
hsa-miR-18b-5p	NCOA3	AIB1.M.V_GBL.9014940	1.17939	0.0105056
hsa-miR-18b-5p	RB1	Rb_pS807_S811.R.V_GBL.9014920	0.790587	0.024297
hsa-miR-18b-5p	WWTR1	TAZ_pS89.R.C_GBL.9014930	0.965406	0.32345
hsa-miR-18b-5p	YAP1	YAP.R.V_GBL.9014936	0.916762	0.135426
hsa-miR-18b-5p	YBX1	YB.1_pS102.R.V_GBL.9014934	0.828955	0.120401
hsa-miR-190a	CAV1	Caveolin.1.R.V_GBL.9014842	1.46938	0.010516
hsa-miR-190a	CDH2	N.Cadherin.R.V_GBL.9014893	0.943948	0.139148
hsa-miR-190a	CDKN1B	p27.R.V_GBL.9014937	0.72838	0.0362954
hsa-miR-190a	ESR1	ER.alpha.R.V_GBL.9014870	0.753647	0.210456
hsa-miR-190a	PTCH1	PTCH.R.C_GBL.9014917	0.863387	0.0140449
hsa-miR-190a	SMAD4	Smad4.M.V_GBL.9014964	0.982131	0.360131
hsa-miR-193a-3p	PTEN	PTEN.R.V_GBL.9014918	1.25987	0.0120516
hsa-miR-193b-3p	KIT	c.Kit.R.V_GBL.9014850	0.821133	0.313473
hsa-miR-193b-3p	PTEN	PTEN.R.V_GBL.9014918	1.12894	0.0632173
hsa-miR-193b-5p	YBX1	YB.1_pS102.R.V_GBL.9014934	0.864608	0.165967
hsa-miR-195-3p	BCL2L11	Bim.R.V_GBL.9014838	1.11721	0.0428024
hsa-miR-195-3p	CDH2	N.Cadherin.R.V_GBL.9014893	0.95195	0.169934
hsa-miR-195-3p	CDK1	CDK1.R.V_GBL.9014844	0.807234	0.107511
hsa-miR-195-3p	ERRFI1	MIG.6.M.V_GBL.9014957	0.955335	0.13835
hsa-miR-195-3p	KIT	c.Kit.R.V_GBL.9014850	0.99017	0.489102
hsa-miR-195-3p	MYC	c.Myc.R.C_GBL.9014853	0.916697	0.0116748
hsa-miR-195-3p	PIK3R1	PI3K.p85.R.V_GBL.9014913	0.90481	0.0251982
hsa-miR-195-3p	PTCH1	PTCH.R.C_GBL.9014917	0.932194	0.070812
hsa-miR-199b-5p	BECN1	Beclin.G.V_GBL.9014969	0.923689	0.189899
hsa-miR-199b-5p	CAV1	Caveolin.1.R.V_GBL.9014842	0.973724	0.40955
hsa-miR-199b-5p	GSK3B	GSK3alpha.beta_pS21_S9.R.V_GBL.9014876	0.830033	0.0252492
hsa-miR-199b-5p	MAPK9	JNK2.R.C_GBL.9014886	1.0278	0.426266
hsa-miR-199b-5p	MET	c.Met_pY1235.R.C_GBL.9014852	0.83465	0.00341315
hsa-miR-199b-5p	PTK2	FAK.R.C_GBL.9014871	0.951718	0.0717228
hsa-miR-199b-5p	PXN	Paxillin.R.V_GBL.9014908	0.705604	0.00557059
hsa-miR-199b-5p	RB1	Rb_pS807_S811.R.V_GBL.9014920	0.891191	0.0964662
hsa-miR-199b-5p	RPS6KB1	p70S6K_pT389.R.V_GBL.9014905	1.16354	0.00127122
hsa-miR-19a-3p	ERBB3	HER3.R.V_GBL.9014881	0.892494	0.106398
hsa-miR-19a-3p	ERRFI1	MIG.6.M.V_GBL.9014987	1.00393	0.477543
hsa-miR-19a-3p	ESR1	ER.alpha.R.V_GBL.9014870	0.751402	0.208587
hsa-miR-19a-3p	GSK3B	GSK3.alpha.beta.M.V_GBL.9014954	0.999271	0.491354
hsa-miR-19a-3p	KIT	c.Kit.R.V_GBL.9014850	0.77289	0.271223
hsa-miR-19a-3p	MAPK1	MAPK_pT202_Y204.R.V_GBL.9014888	0.896366	0.0121598
hsa-miR-19a-3p	MAPK14	p38_pT180_Y182.R.V_GBL.9014903	0.789157	0.0239926
hsa-miR-19a-3p	NOTCH1	Notch1.R.V_GBL.9014896	1.00064	0.495226
hsa-miR-19a-3p	PIK3CA	PI3K.p110.alpha.R.C_GBL.9014912	0.852304	0.0596445
hsa-miR-19a-3p	PRKAA1	AMPK_pT172.R.V_GBL.9014829	0.928713	0.041629
hsa-miR-19a-3p	PRKCA	PKC.alpha_pS657.R.V_GBL.9014914	1.02725	0.21057
hsa-miR-19a-3p	PTEN	PTEN.R.V_GBL.9014918	0.853516	0.0485045
hsa-miR-19a-3p	RAF1	C.Raf.R.V_GBL.9014857	0.703665	0.0168977
hsa-miR-19a-3p	YWHAE	X14.3.3_epsilon.M.C_GBL.9014939	0.998426	0.488212
hsa-miR-19b-1-5p	AKT3	Akt_pS473.R.V_GBL.9014825	0.551762	0.0101168
hsa-miR-19b-1-5p	CAV1	Caveolin.1.R.V_GBL.9014842	1.11634	0.174998
hsa-miR-19b-1-5p	CDH2	N.Cadherin.R.V_GBL.9014893	1.13815	0.0236501
hsa-miR-19b-1-5p	TP53BP1	X53BP1.R.C_GBL.9014822	1.00708	0.460428
hsa-miR-19b-3p	BCL2L11	Bim.R.V_GBL.9014838	1.22649	0.0082051
hsa-miR-19b-3p	ERBB3	HER3.R.V_GBL.9014881	0.947004	0.246745
hsa-miR-19b-3p	ERRFI1	MIG.6.M.V_GBL.9014957	1.0065	0.429665
hsa-miR-19b-3p	ESR1	ER.alpha.R.V_GBL.9014870	0.912358	0.381242
hsa-miR-19b-3p	GSK3B	GSK3.alpha.beta.M.V_GBL.9014954	0.983821	0.318849
hsa-miR-19b-3p	KIT	c.Kit.R.V_GBL.9014850	0.834396	0.325851
hsa-miR-19b-3p	MAPK1	MAPK_pT202_Y204.R.V_GBL.9014888	0.821438	0.00268379
hsa-miR-19b-3p	NOTCH1	Notch1.R.V_GBL.9014896	1.00172	0.487196
hsa-miR-19b-3p	PIK3CA	PI3K.p110.alpha.R.C_GBL.9014912	0.801087	0.0309361
hsa-miR-19b-3p	PRKAA1	AMPK.alpha.R.C_GBL.9014828	0.881107	0.171493
hsa-miR-19b-3p	PTEN	PTEN.R.V_GBL.9014918	0.87627	0.0685821
hsa-miR-19b-3p	RAF1	C.Raf.R.V_GBL.9014857	0.594111	0.00730482
hsa-miR-19b-3p	YWHAE	X14.3.3_epsilon.M.C_GBL.9014939	0.973547	0.313594
hsa-miR-205-5p	ERBB3	HER3.R.V_GBL.9014881	0.876863	0.0842664
hsa-miR-205-5p	ERRFI1	MIG.6.M.V_GBL.9014957	0.722087	0.00186325
hsa-miR-205-5p	GATA3	GATA3.M.V_GBL.9014953	0.905009	0.034108
hsa-miR-205-5p	NCOA3	AIB1.M.V_GBL.9014940	1.00163	0.485142
hsa-miR-206	CCND1	Cyclin.D1.R.V_GBL.9014859	0.84114	0.0750112
hsa-miR-206	CDH2	N.Cadherin.R.V_GBL.9014893	1.00853	0.426779
hsa-miR-206	EIF4E	eIF4E.R.V_GBL.9014868	0.977997	0.407066
hsa-miR-206	FN1	Fibronectin.R.C_GBL.9014872	0.899798	0.194699
hsa-miR-206	MAPK1	MAPK_pT202_Y204.R.V_GBL.9014888	0.735094	0.000851866
hsa-miR-206	MAPK3	MAPK_pT202_Y204.R.V_GBL.9014888	0.735094	0.000851866
hsa-miR-206	MET	c.Met_pY1235.R.C_GBL.9014852	0.748898	0.00101806
hsa-miR-206	NCOA3	AIB1.M.V_GBL.9014940	1.01636	0.355759
hsa-miR-206	SMAD1	Smad1.R.V_GBL.9014923	0.891931	0.127115
hsa-miR-206	SNAI2	Snail.M.C_GBL.9014965	1.26648	0.150451
hsa-miR-208b	BCL2L11	Bim.R.V_GBL.9014838	1.00266	0.47892
hsa-miR-208b	CDKN1A	p21.R.C_GBL.9014898	0.929739	0.149859
hsa-miR-208b	GATA3	GATA3.M.V_GBL.9014953	0.934292	0.0744081
hsa-miR-208b	PTCH1	PTCH.R.C_GBL.9014917	1.09629	0.0334741
hsa-miR-208b	RB1	Rb_pS807_S811.R.V_GBL.9014920	0.914843	0.140844
hsa-miR-208b	YBX1	YB.1_pS102.R.V_GBL.9014934	1.00268	0.491591
hsa-miR-20a-5p	AKT3	Akt_pS473.R.V_GBL.9014825	0.705929	0.0296254
hsa-miR-20a-5p	BCL2L11	Bim.R.V_GBL.9014838	1.09275	0.0696576
hsa-miR-20a-5p	BECN1	Beclin.G.V_GBL.9014969	0.8669	0.0855134
hsa-miR-20a-5p	CCND1	Cyclin.D1.R.V_GBL.9014859	0.82674	0.0633682
hsa-miR-20a-5p	CDKN1A	p21.R.C_GBL.9014898	0.963747	0.28234
hsa-miR-20a-5p	ESR1	ER.alpha_pS118.R.V_GBL.9014869	0.890758	0.00349407
hsa-miR-20a-5p	MYC	c.Myc.R.C_GBL.9014853	0.9494	0.0400798
hsa-miR-20a-5p	NCOA3	AIB1.M.V_GBL.9014940	1.03736	0.210818
hsa-miR-20a-5p	PIK3R1	PI3K.p85.R.V_GBL.9014913	1.07276	0.0468813
hsa-miR-20a-5p	PTEN	PTEN.R.V_GBL.9014918	1.21381	0.019969
hsa-miR-20a-5p	PTK2	FAK.R.C_GBL.9014871	0.996919	0.453954
hsa-miR-20a-5p	RB1	Rb.M.V_GBL.9014952	0.940998	0.230743
hsa-miR-20a-5p	RPS6KA1	p90RSK_pT359_S363.R.C_GBL.9014907	0.836986	0.0388913
hsa-miR-20a-5p	SMAD1	Smad1.R.V_GBL.9014923	0.850717	0.0736339
hsa-miR-20a-5p	SMAD4	Smad4.M.V_GBL.9014964	1.02262	0.326313
hsa-miR-20a-5p	STAT3	STAT3_pY705.R.V_GBL.9014927	1.09604	0.0973195
hsa-miR-20a-5p	VASP	VASP.R.C_GBL.9014877	1.03373	0.318755
hsa-miR-20a-5p	XIAP	XIAP.R.C_GBL.9014933	0.794635	0.0197316
hsa-miR-20b-5p	AKT3	Akt.R.V_GBL.9014827	0.919846	0.0882278
hsa-miR-20b-5p	BCL2L11	Bim.R.V_GBL.9014838	1.21526	0.00942105
hsa-miR-20b-5p	BECN1	Beclin.G.V_GBL.9014969	0.94452	0.25464
hsa-miR-20b-5p	CCND1	Cyclin.D1.R.V_GBL.9014859	0.837478	0.0718265
hsa-miR-20b-5p	CDKN1A	p21.R.C_GBL.9014898	0.899135	0.0852299
hsa-miR-20b-5p	NCOA3	AIB1.M.V_GBL.9014940	0.991071	0.419324
hsa-miR-20b-5p	PIK3R1	PI3K.p85.R.V_GBL.9014913	0.909172	0.0282264
hsa-miR-20b-5p	PTEN	PTEN.R.V_GBL.9014918	1.24474	0.0141147
hsa-miR-20b-5p	PTK2	FAK.R.C_GBL.9014871	0.958933	0.0961998
hsa-miR-20b-5p	RB1	Rb_pS807_S811.R.V_GBL.9014920	0.82262	0.0360544
hsa-miR-20b-5p	RPS6KA1	p90RSK_pT359_S363.R.C_GBL.9014907	0.846914	0.0447364
hsa-miR-20b-5p	SMAD1	Smad1.R.V_GBL.9014923	0.86385	0.0872457
hsa-miR-20b-5p	STAT3	STAT3_pY705.R.V_GBL.9014927	1.03417	0.297696
hsa-miR-20b-5p	VASP	VASP.R.C_GBL.9014877	0.975549	0.365047
hsa-miR-214-3p	CTNNB1	beta.Catenin.R.V_GBL.9014836	1.01108	0.429236
hsa-miR-214-3p	ERRFI1	MIG.6.M.V_GBL.9014957	0.634825	0.000839175
hsa-miR-214-3p	GSK3B	GSK3alpha.beta_pS21_S9.R.V_GBL.9014876	0.71335	0.00640189
hsa-miR-214-3p	PTEN	PTEN.R.V_GBL.9014918	1.25932	0.0121189
hsa-miR-214-3p	VASP	VASP.R.C_GBL.9014877	0.898587	0.107121
hsa-miR-21-5p	AKT3	Akt_pS473.R.V_GBL.9014825	0.500496	0.00753701
hsa-miR-21-5p	BCL2	Bcl.2.M.V_GBL.9014998	1.16709	0.153391
hsa-miR-21-5p	MSH2	MSH2.M.C_GBL.9014958	0.928146	0.17213
hsa-miR-21-5p	PIK3R1	PI3K.p85.R.V_GBL.9014913	0.935773	0.0609057
hsa-miR-217	AKT3	Akt_pS473.R.V_GBL.9014825	0.437036	0.00541121
hsa-miR-217	CTNNB1	beta.Catenin.R.V_GBL.9014836	0.959831	0.266215
hsa-miR-217	FN1	Fibronectin.R.C_GBL.9014872	0.90809	0.212529
hsa-miR-217	FOXO3	FOXO3a.R.C_GBL.9014874	0.672744	0.01595
hsa-miR-217	PTEN	PTEN.R.V_GBL.9014918	1.12024	0.0724707
hsa-miR-217	RPS6KB1	p70S6K.R.V_GBL.9014906	0.855878	0.0613948
hsa-miR-217	VASP	VASP.R.C_GBL.9014877	1.09726	0.114513
hsa-miR-218-5p	GSK3B	GSK3alpha.beta_pS21_S9.R.V_GBL.9014876	0.903917	0.0855434
hsa-miR-218-5p	KIT	c.Kit.R.V_GBL.9014850	0.869472	0.360032
hsa-miR-218-5p	RPS6KB1	p70S6K.R.V_GBL.9014906	0.769458	0.021071
hsa-miR-218-5p	SNAI2	Snail.M.C_GBL.9014965	1.13987	0.279746
hsa-miR-219-1-3p	FN1	Fibronectin.R.C_GBL.9014872	0.818305	0.0831316
hsa-miR-219-1-3p	PTEN	PTEN.R.V_GBL.9014918	1.34346	0.00563452
hsa-miR-219-5p	ESR1	ER.alpha_pS118.R.V_GBL.9014869	0.976504	0.124544
hsa-miR-219-5p	FOXO3	FOXO3A_pS318_S321.R.C_GBL.9014873	0.887412	0.160319
hsa-miR-219-5p	GSK3B	GSK3.alpha.beta.M.V_GBL.9014954	0.831009	0.00605595
hsa-miR-219-5p	NFKB1	NF.kB.p65_pS536.R.C_GBL.9014895	0.812667	0.00987039
hsa-miR-219-5p	PTEN	PTEN.R.V_GBL.9014918	0.805087	0.0251225
hsa-miR-221-3p	BCL2L11	Bim.R.V_GBL.9014838	1.17823	0.0155379
hsa-miR-221-3p	CDH2	N.Cadherin.R.V_GBL.9014893	1.08077	0.0765786
hsa-miR-221-3p	CDKN1B	p27.R.V_GBL.9014937	0.775822	0.0552571
hsa-miR-221-3p	CTNNB1	beta.Catenin.R.V_GBL.9014836	0.635914	0.00390421
hsa-miR-221-3p	ERBB3	HER3.R.V_GBL.9014881	0.785482	0.0256801
hsa-miR-221-3p	ESR1	ER.alpha_pS118.R.V_GBL.9014869	0.961475	0.0506896
hsa-miR-221-3p	KIT	c.Kit.R.V_GBL.9014850	1.08347	0.408721
hsa-miR-221-3p	PTK2	FAK.pY397_GBL.9014963	0.773387	0.0037569
hsa-miR-221-3p	RPS6KB1	p70S6K.R.V_GBL.9014906	0.968162	0.334897
hsa-miR-222-3p	BCL2L11	Bim.R.V_GBL.9014838	1.33319	0.0027772
hsa-miR-222-3p	CDH2	N.Cadherin.R.V_GBL.9014893	0.903181	0.0534015
hsa-miR-222-3p	CDKN1B	p27.R.V_GBL.9014937	0.800731	0.0700028
hsa-miR-222-3p	CTNNB1	beta.Catenin.R.V_GBL.9014836	0.785433	0.0164696
hsa-miR-222-3p	ERBB3	HER3_pY1298.R.C_GBL.9014880	1.0979	0.052734
hsa-miR-222-3p	ESR1	ER.alpha.R.V_GBL.9014870	1.13352	0.324437
hsa-miR-222-3p	KDR	VEGFR2.R.V_GBL.9014932	1.01328	0.459353
hsa-miR-222-3p	KIT	c.Kit.R.V_GBL.9014850	0.992775	0.491989
hsa-miR-222-3p	PTK2	FAK.R.C_GBL.9014871	0.899178	0.0130096
hsa-miR-222-3p	RPS6KB1	p70S6K.R.V_GBL.9014906	0.955015	0.276679
hsa-miR-222-3p	YWHAE	X14.3.3_epsilon.M.C_GBL.9014939	0.864619	0.035087
hsa-miR-22-3p	AKT3	Akt_pS473.R.V_GBL.9014825	0.400312	0.00453188
hsa-miR-22-3p	ERBB3	HER3.R.V_GBL.9014881	0.764482	0.020383
hsa-miR-22-3p	ESR1	ER.alpha_pS118.R.V_GBL.9014869	0.97423	0.107868
hsa-miR-22-3p	MAPK14	p38_MAPK.R.C_GBL.9014902	0.791709	0.0416506
hsa-miR-22-3p	PTEN	PTEN.R.V_GBL.9014918	0.867138	0.0595087
hsa-miR-224-3p	CCND1	Cyclin.D1.R.V_GBL.9014859	0.896306	0.149018
hsa-miR-224-3p	GAB2	GAB2.R.V_GBL.9014875	0.574714	0.000195212
hsa-miR-224-3p	KIT	c.Kit.R.V_GBL.9014850	0.852692	0.343429
hsa-miR-224-3p	MAP2K1	MEK1.R.V_GBL.9014890	0.816517	0.00958212
hsa-miR-224-3p	MAPK9	JNK2.R.C_GBL.9014886	0.8734	0.212307
hsa-miR-224-3p	NOTCH1	Notch1.R.V_GBL.9014896	0.854641	0.0300771
hsa-miR-224-3p	RB1	Rb_pS807_S811.R.V_GBL.9014920	0.641609	0.00588416
hsa-miR-23b-3p	CASP7	Caspase.7_cleavedD198.R.C_GBL.9014840	0.809294	0.146594
hsa-miR-23b-3p	GSK3B	GSK3.alpha.beta.M.V_GBL.9014954	1.11113	0.0185582
hsa-miR-23b-3p	MAPK14	p38_MAPK.R.C_GBL.9014902	0.883253	0.123492
hsa-miR-23b-3p	MET	c.Met.M.C_GBL.9014985	0.927107	0.0967065
hsa-miR-23b-3p	PTEN	PTEN.R.V_GBL.9014918	1.11156	0.0833431
hsa-miR-23b-3p	SNAI2	Snail.M.C_GBL.9014965	0.932896	0.387043
hsa-miR-24-3p	AKT3	Akt_pS473.R.V_GBL.9014825	0.546114	0.00978122
hsa-miR-24-3p	BCL2L11	Bim.R.V_GBL.9014838	1.12052	0.040221
hsa-miR-24-3p	CDKN1B	p27_pT157.R.C_GBL.9014899	0.797056	0.025359
hsa-miR-24-3p	ERBB3	HER3.R.V_GBL.9014881	1.10651	0.108024
hsa-miR-24-3p	GSK3B	GSK3.alpha.beta.M.V_GBL.9014954	1.02358	0.251001
hsa-miR-24-3p	MAPK14	p38_MAPK.R.C_GBL.9014902	0.979425	0.408393
hsa-miR-24-3p	RPS6KB1	p70S6K.R.V_GBL.9014906	0.990331	0.447665
hsa-miR-26a-5p	CCNE1	Cyclin_E1.M.V_GBL.9014986	0.931159	0.0598122
hsa-miR-26a-5p	CDH2	N.Cadherin.R.V_GBL.9014893	1.01824	0.348152
hsa-miR-26a-5p	CTNNB1	beta.Catenin.R.V_GBL.9014836	0.78586	0.0165543
hsa-miR-26a-5p	EIF4E	eIF4E.R.V_GBL.9014868	1.01961	0.416928
hsa-miR-26a-5p	ERRFI1	MIG.6.M.V_GBL.9014957	1.09475	0.0335518
hsa-miR-26a-5p	GSK3B	GSK3.alpha.beta.M.V_GBL.9014954	0.943052	0.0816982
hsa-miR-26a-5p	PTEN	PTEN.R.V_GBL.9014918	0.745189	0.0126953
hsa-miR-26a-5p	PTGS2	COX.2.R.C_GBL.9014979	0.893562	0.138391
hsa-miR-26a-5p	RB1	Rb_pS807_S811.R.V_GBL.9014920	0.908121	0.126316
hsa-miR-26a-5p	SMAD1	Smad1.R.V_GBL.9014923	0.800857	0.0404651
hsa-miR-26a-5p	YWHAE	X14.3.3_epsilon.M.C_GBL.9014939	1.11669	0.0488652
hsa-miR-29a-3p	AKT3	Akt_pS473.R.V_GBL.9014825	0.438247	0.00544387
hsa-miR-29a-3p	BAK1	Bak.R.C_GBL.9014832	0.902026	0.0637103
hsa-miR-29a-3p	CCNE1	Cyclin_E1.M.V_GBL.9014986	1.04613	0.121819
hsa-miR-29a-3p	GSK3B	GSK3.alpha.beta.M.V_GBL.9014954	0.960271	0.144953
hsa-miR-29a-3p	NCOA3	AIB1.M.V_GBL.9014940	0.809183	0.00889325
hsa-miR-29a-3p	PIK3R1	PI3K.p85.R.V_GBL.9014913	0.859535	0.0092112
hsa-miR-29a-3p	PTEN	PTEN.R.V_GBL.9014918	0.880335	0.0731423
hsa-miR-29a-3p	WWTR1	TAZ_pS89.R.C_GBL.9014930	1.0113	0.439454
hsa-miR-29a-3p	YWHAE	X14.3.3_epsilon.M.C_GBL.9014939	0.943135	0.165139
hsa-miR-29b-2-5p	CDH2	N.Cadherin.R.V_GBL.9014893	1.07291	0.0921445
hsa-miR-29b-2-5p	CTNNB1	beta.Catenin.R.V_GBL.9014836	0.88592	0.0698027
hsa-miR-29b-2-5p	YAP1	YAP_pS127.R.C_GBL.9014935	0.881229	0.0856156
hsa-miR-29b-2-5p	YWHAE	X14.3.3_epsilon.M.C_GBL.9014939	1.00392	0.470668
hsa-miR-29b-3p	AKT3	Akt_pS473.R.V_GBL.9014825	0.469294	0.00637701
hsa-miR-29b-3p	BAK1	Bak.R.C_GBL.9014832	0.840452	0.0211017
hsa-miR-29b-3p	CDKN1A	p21.R.C_GBL.9014898	0.883861	0.0652899
hsa-miR-29b-3p	FOXO3	FOXO3a.R.C_GBL.9014874	0.941616	0.27297
hsa-miR-29b-3p	GSK3B	GSK3.alpha.beta.M.V_GBL.9014954	0.932152	0.058153
hsa-miR-29b-3p	IRS1	IRS1.R.V_GBL.9014885	0.718469	0.000375445
hsa-miR-29b-3p	NCOA3	AIB1.M.V_GBL.9014940	0.787949	0.00665989
hsa-miR-29b-3p	PIK3R1	PI3K.p85.R.V_GBL.9014913	0.975686	0.23855
hsa-miR-29b-3p	PTEN	PTEN.R.V_GBL.9014918	0.910732	0.120883
hsa-miR-29b-3p	WWTR1	TAZ_pS89.R.C_GBL.9014930	0.948205	0.25139
hsa-miR-29b-3p	YWHAE	X14.3.3_epsilon.M.C_GBL.9014939	1.12324	0.0433865
hsa-miR-29c-3p	ACACA	ACC1.R.C_GBL.9014824	0.991284	0.410973
hsa-miR-29c-3p	AKT3	Akt_pS473.R.V_GBL.9014825	0.403409	0.00459846
hsa-miR-29c-3p	BAK1	Bak.R.C_GBL.9014832	0.821044	0.0157559
hsa-miR-29c-3p	CCNE1	Cyclin_E1.M.V_GBL.9014950	1.02256	0.335564
hsa-miR-29c-3p	FOXO3	FOXO3a.R.C_GBL.9014874	0.794805	0.0485594
hsa-miR-29c-3p	GSK3B	GSK3.alpha.beta.M.V_GBL.9014954	0.931689	0.0573461
hsa-miR-29c-3p	NCOA3	AIB1.M.V_GBL.9014940	0.746076	0.00402129
hsa-miR-29c-3p	PIK3R1	PI3K.p85.R.V_GBL.9014913	0.960097	0.137831
hsa-miR-29c-3p	PTEN	PTEN.R.V_GBL.9014918	0.917707	0.136212
hsa-miR-29c-3p	WWTR1	TAZ_pS89.R.C_GBL.9014930	1.02701	0.359267
hsa-miR-29c-3p	YWHAE	X14.3.3_epsilon.M.C_GBL.9014939	1.03765	0.249337
hsa-miR-30d-5p	AKT3	Akt_pS473.R.V_GBL.9014825	0.883317	0.162052
hsa-miR-30d-5p	AR	AR.R.V_GBL.9014831	0.897306	0.0731308
hsa-miR-30d-5p	BCL2	Bcl.2.M.V_GBL.9014998	0.863647	0.194955
hsa-miR-30d-5p	NCOA3	AIB1.M.V_GBL.9014940	1.02587	0.283039
hsa-miR-30d-5p	NOTCH1	Notch1.R.V_GBL.9014896	0.98398	0.383325
hsa-miR-30d-5p	RPS6KB1	p70S6K.R.V_GBL.9014906	0.87478	0.0805276
hsa-miR-30d-5p	SMAD1	Smad1.R.V_GBL.9014923	0.822156	0.0517865
hsa-miR-30d-5p	SNAI2	Snail.M.C_GBL.9014965	1.036	0.438476
hsa-miR-30d-5p	WWTR1	TAZ_pS89.R.C_GBL.9014930	0.706555	0.0115486
hsa-miR-30d-5p	YBX1	YB.1_pS102.R.V_GBL.9014934	0.992983	0.478027
hsa-miR-323b-5p	GSK3B	GSK3.alpha.beta.M.V_GBL.9014954	0.747935	0.00194232
hsa-miR-32-3p	BAX	Bax.R.V_GBL.9014833	1.03984	0.106163
hsa-miR-32-3p	BECN1	Beclin.G.V_GBL.9014969	1.02826	0.364477
hsa-miR-32-3p	CDK1	CDK1.R.V_GBL.9014947	0.951726	0.169167
hsa-miR-32-3p	IGF1R	IGF.1R.beta.R.C_GBL.9014883	1.09482	0.00276364
hsa-miR-32-3p	IRS1	IRS1.R.V_GBL.9014885	0.995559	0.418368
hsa-miR-32-3p	PTK2	FAK.R.C_GBL.9014871	0.998417	0.476278
hsa-miR-32-3p	RAF1	C.Raf_pS338.R.C_GBL.9014856	0.769874	0.120692
hsa-miR-32-3p	YWHAE	X14.3.3_epsilon.M.C_GBL.9014939	0.876704	0.0433434
hsa-miR-330-5p	AKT3	Akt_pT308.R.V_GBL.9014971	0.863658	0.382584
hsa-miR-335-5p	CASP7	Caspase.7_cleavedD198.R.C_GBL.9014840	0.938643	0.354968
hsa-miR-335-5p	ESR1	ER.alpha.R.V_GBL.9014870	0.548788	0.0935028
hsa-miR-335-5p	IRS1	IRS1.R.V_GBL.9014885	0.925337	0.01627
hsa-miR-335-5p	MET	c.Met_pY1235.R.C_GBL.9014852	0.827456	0.00302246
hsa-miR-34a-5p	BCL2	Bcl.2.M.V_GBL.9014998	0.636326	0.0377095
hsa-miR-34a-5p	ERRFI1	MIG.6.M.V_GBL.9014987	1.01032	0.441271
hsa-miR-34a-5p	GATA3	GATA3.M.V_GBL.9014953	0.925936	0.0587781
hsa-miR-34a-5p	MAP2K1	MEK1.R.V_GBL.9014890	0.657307	0.00164381
hsa-miR-34a-5p	MET	c.Met_pY1235.R.C_GBL.9014852	0.705495	0.000636931
hsa-miR-34a-5p	NOTCH1	Notch1.R.V_GBL.9014896	2.03529	0.00011824
hsa-miR-34a-5p	PEA15	Pea.15.R.V_GBL.9014911	0.952573	0.313539
hsa-miR-34a-5p	SMAD4	Smad4.M.V_GBL.9014964	0.937121	0.130092
hsa-miR-34b-3p	ESR1	ER.alpha.R.V_GBL.9014870	0.928037	0.401737
hsa-miR-34b-3p	GSK3B	GSK3alpha.beta_pS21_S9.R.V_GBL.9014876	0.980062	0.367373
hsa-miR-34b-3p	MET	c.Met.M.C_GBL.9014985	0.886843	0.040424
hsa-miR-34b-3p	RB1	Rb.M.V_GBL.9014952	0.843393	0.0557082
hsa-miR-34b-3p	RPS6KB1	p70S6K.R.V_GBL.9014906	0.993103	0.462588
hsa-miR-34b-5p	AKT3	Akt_pS473.R.V_GBL.9014825	0.462195	0.00614623
hsa-miR-34b-5p	CTNNB1	beta.Catenin.R.V_GBL.9014836	0.824388	0.0271619
hsa-miR-34b-5p	GATA3	GATA3.M.V_GBL.9014953	1.12457	0.0175809
hsa-miR-34b-5p	GSK3B	GSK3alpha.beta_pS21_S9.R.V_GBL.9014876	0.758637	0.0102395
hsa-miR-34b-5p	MET	c.Met_pY1235.R.C_GBL.9014852	0.713859	0.000693406
hsa-miR-34b-5p	MYC	c.Myc.R.C_GBL.9014853	0.65681	0.000198073
hsa-miR-34b-5p	RPS6KB1	p70S6K_pT389.R.V_GBL.9014905	0.892261	0.00422775
hsa-miR-34c-5p	BCL2	Bcl.2.M.V_GBL.9014998	0.768557	0.0936665
hsa-miR-34c-5p	ERRFI1	MIG.6.M.V_GBL.9014987	1.01607	0.409281
hsa-miR-34c-5p	GATA3	GATA3.M.V_GBL.9014953	0.899073	0.0295786
hsa-miR-34c-5p	MAP2K1	MEK1.R.V_GBL.9014890	0.595053	0.00100963
hsa-miR-34c-5p	MET	c.Met_pY1235.R.C_GBL.9014852	0.757835	0.00113209
hsa-miR-365a-3p	AKT3	Akt.R.V_GBL.9014827	0.767593	0.00726518
hsa-miR-365a-3p	PTEN	PTEN.R.V_GBL.9014918	1.09105	0.117282
hsa-miR-367-5p	KIT	c.Kit.R.V_GBL.9014850	1.02975	0.467068
hsa-miR-372	BCL2L11	Bim.R.V_GBL.9014838	1.15618	0.0217378
hsa-miR-372	GSK3B	GSK3.alpha.beta.M.V_GBL.9014954	1.07628	0.0453685
hsa-miR-372	NCOA3	AIB1.M.V_GBL.9014940	1.33472	0.00182067
hsa-miR-372	PARP1	PARP_cleaved.M.C_GBL.9014960	0.970958	0.208545
hsa-miR-372	PIK3CA	PI3K.p110.alpha.R.C_GBL.9014912	0.79372	0.0283721
hsa-miR-372	PTEN	PTEN.R.V_GBL.9014918	0.869185	0.0614117
hsa-miR-372	RPS6KA1	p90RSK_pT359_S363.R.C_GBL.9014907	1.03019	0.329293
hsa-miR-373-3p	BCL2L11	Bim.R.V_GBL.9014838	1.49201	0.00089442
hsa-miR-373-3p	ESR1	ER.alpha.R.V_GBL.9014870	0.917885	0.388411
hsa-miR-373-3p	PECAM1	CD31.M.V_GBL.9014946	0.973713	0.221925
hsa-miR-373-3p	PIK3CA	PI3K.p110.alpha.R.C_GBL.9014912	0.744694	0.0166932
hsa-miR-373-3p	PTEN	PTEN.R.V_GBL.9014918	0.900702	0.102042
hsa-miR-374a-3p	IGF1R	IGF.1R.beta.R.C_GBL.9014883	1.01263	0.204207
hsa-miR-374a-3p	MAPK9	JNK2.R.C_GBL.9014886	0.995002	0.486628
hsa-miR-374a-3p	TP53BP1	X53BP1.R.C_GBL.9014822	0.982532	0.403575
hsa-miR-421	ACACA	ACC1.R.C_GBL.9014824	0.684542	0.00150393
hsa-miR-421	AKT3	Akt_pS473.R.V_GBL.9014825	0.423633	0.0050663
hsa-miR-421	FOXO3	FOXO3A_pS318_S321.R.C_GBL.9014873	0.944315	0.299197
hsa-miR-421	GATA3	GATA3.M.V_GBL.9014953	1.01477	0.346691
hsa-miR-421	PECAM1	CD31.M.V_GBL.9014946	1.06957	0.051176
hsa-miR-421	PTEN	PTEN.R.V_GBL.9014918	1.09388	0.111777
hsa-miR-421	RPS6KB1	p70S6K.R.V_GBL.9014906	0.545226	0.00335294
hsa-miR-421	SMAD1	Smad1.R.V_GBL.9014923	0.941182	0.249824
hsa-miR-421	TP53BP1	X53BP1.R.C_GBL.9014822	0.766781	0.0189434
hsa-miR-429	ACACA	ACC1.R.C_GBL.9014824	1.00249	0.474204
hsa-miR-429	AKT2	Akt_pT308.R.V_GBL.9014971	0.775883	0.314122
hsa-miR-429	CDKN1B	p27.R.V_GBL.9014980	0.845883	0.0800198
hsa-miR-429	ERRFI1	MIG.6.M.V_GBL.9014987	0.836991	0.0424304
hsa-miR-429	FN1	Fibronectin.R.C_GBL.9014872	0.635403	0.0177117
hsa-miR-429	KDR	VEGFR2.R.V_GBL.9014932	1.25949	0.0593696
hsa-miR-429	NCOA3	AIB1.M.V_GBL.9014940	0.906257	0.0510927
hsa-miR-429	NOTCH1	Notch1.R.V_GBL.9014896	0.929247	0.123441
hsa-miR-429	PRKCA	PKC.alpha.M.V_GBL.9014962	0.828318	0.0221614
hsa-miR-429	PTCH1	PTCH.R.C_GBL.9014917	1.09387	0.0355023
hsa-miR-429	PTEN	PTEN.R.V_GBL.9014918	1.17842	0.0310668
hsa-miR-429	RPS6KB1	p70S6K.R.V_GBL.9014906	0.813954	0.0353098
hsa-miR-429	SNAI2	Snail.M.C_GBL.9014965	1.38301	0.0855034
hsa-miR-429	XIAP	XIAP.R.C_GBL.9014933	0.851033	0.042367
hsa-miR-432-3p	ESR1	ER.alpha.R.V_GBL.9014870	0.782063	0.235453
hsa-miR-432-3p	PTK2	FAK.R.C_GBL.9014871	0.754095	0.00105381
hsa-miR-432-3p	YBX1	YB.1_pS102.R.V_GBL.9014934	0.716083	0.0470489
hsa-miR-454-3p	AR	AR.R.V_GBL.9014831	0.897326	0.0731575
hsa-miR-454-3p	BCL2L11	Bim.R.V_GBL.9014838	1.13079	0.0333577
hsa-miR-454-3p	CDKN1A	p21.R.C_GBL.9014898	1.06891	0.153742
hsa-miR-454-3p	ERBB3	HER3.R.V_GBL.9014881	0.862889	0.06887
hsa-miR-454-3p	ESR1	ER.alpha.R.V_GBL.9014870	0.919851	0.390977
hsa-miR-454-3p	GSK3B	GSK3.alpha.beta.M.V_GBL.9014954	0.984408	0.324735
hsa-miR-454-3p	KIT	c.Kit.R.V_GBL.9014850	0.75942	0.260234
hsa-miR-454-3p	MAPK1	MAPK_pT202_Y204.R.V_GBL.9014888	1.02441	0.196742
hsa-miR-454-3p	MAPK9	JNK2.R.C_GBL.9014886	1.0209	0.444345
hsa-miR-454-3p	MET	c.Met_pY1235.R.C_GBL.9014852	0.802922	0.00206196
hsa-miR-454-3p	PRKAA1	AMPK_pT172.R.V_GBL.9014829	0.752616	0.00150476
hsa-miR-454-3p	PTEN	PTEN.R.V_GBL.9014918	1.13175	0.0605326
hsa-miR-454-3p	RPS6KB1	p70S6K.R.V_GBL.9014906	1.08357	0.152177
hsa-miR-454-3p	YWHAE	X14.3.3_epsilon.M.C_GBL.9014939	0.986137	0.397932
hsa-miR-455-5p	CDKN1B	p27.R.V_GBL.9014937	0.899571	0.194379
hsa-miR-455-5p	GSK3B	GSK3alpha.beta_pS21_S9.R.V_GBL.9014876	0.903656	0.0851274
hsa-miR-455-5p	KDR	VEGFR2.R.V_GBL.9014932	1.10757	0.217564
hsa-miR-455-5p	KIT	c.Kit.R.V_GBL.9014850	0.559575	0.13799
hsa-miR-455-5p	RAF1	C.Raf.R.V_GBL.9014857	0.8799	0.114352
hsa-miR-455-5p	RPS6KB1	p70S6K.R.V_GBL.9014906	0.682516	0.00912965
hsa-miR-483-3p	CTNNB1	beta.Catenin.R.V_GBL.9014836	0.932918	0.162411
hsa-miR-490-5p	PIK3CA	PI3K.p110.alpha.R.C_GBL.9014912	0.896101	0.112768
hsa-miR-491-3p	FOXO3	FOXO3a.R.C_GBL.9014874	0.821382	0.0647055
hsa-miR-491-3p	TP53BP1	X53BP1.R.C_GBL.9014822	1.18125	0.0349345
hsa-miR-494	BCL2L11	Bim.R.V_GBL.9014838	1.20743	0.0104102
hsa-miR-494	CCND1	Cyclin.D1.R.V_GBL.9014859	0.847073	0.0805281
hsa-miR-494	CDKN1B	p27_pT157.R.C_GBL.9014899	0.983272	0.405566
hsa-miR-494	CTNNB1	beta.Catenin.R.V_GBL.9014836	1.01184	0.424518
hsa-miR-494	MAP2K1	MEK1_pS217_S221.R.V_GBL.9014889	0.891183	0.0015154
hsa-miR-494	NCOA3	AIB1.M.V_GBL.9014940	0.918246	0.0675633
hsa-miR-494	PIK3R1	PI3K.p85.R.V_GBL.9014913	1.06651	0.056713
hsa-miR-494	PTEN	PTEN.R.V_GBL.9014918	0.746003	0.0128029
hsa-miR-494	RPS6KB1	p70S6K.R.V_GBL.9014906	1.00897	0.451402
hsa-miR-494	SMAD1	Smad1.R.V_GBL.9014923	0.838942	0.0635042
hsa-miR-494	XIAP	XIAP.R.C_GBL.9014933	0.756341	0.012685
hsa-miR-505-3p	CDKN1B	p27_pT198.R.V_GBL.9014900	0.966258	0.410044
hsa-miR-505-3p	CHEK1	Chk1.R.C_GBL.9014846	0.874242	0.0103385
hsa-miR-505-3p	PTK2	FAK.pY397_GBL.9014963	0.910872	0.0422618
hsa-miR-505-3p	YBX1	YB.1_pS102.R.V_GBL.9014934	1.24843	0.0621947
hsa-miR-506-3p	AKT3	Akt_pS473.R.V_GBL.9014825	0.498088	0.00743813
hsa-miR-506-3p	AR	AR.R.V_GBL.9014831	1.20416	0.0151944
hsa-miR-506-3p	BCL2L11	Bim.R.V_GBL.9014838	1.17158	0.0171382
hsa-miR-506-3p	BECN1	Beclin.G.V_GBL.9014969	0.841161	0.0610032
hsa-miR-506-3p	CDH2	N.Cadherin.R.V_GBL.9014893	0.886057	0.0373707
hsa-miR-506-3p	GSK3B	GSK3alpha.beta_pS21_S9.R.V_GBL.9014876	0.946162	0.19468
hsa-miR-506-3p	MAPK1	MAPK_pT202_Y204.R.V_GBL.9014888	1.01325	0.313422
hsa-miR-506-3p	PIK3CA	PI3K.p110.alpha.R.C_GBL.9014912	1.00723	0.461199
hsa-miR-506-3p	RPS6KB1	p70S6K_pT389.R.V_GBL.9014905	0.96824	0.0825392
hsa-miR-506-3p	SMAD4	Smad4.M.V_GBL.9014964	0.948266	0.168677
hsa-miR-506-3p	SNAI2	Snail.M.C_GBL.9014965	1.36692	0.0922443
hsa-miR-507	AKT3	Akt_pS473.R.V_GBL.9014825	0.443626	0.0055921
hsa-miR-507	BCL2	Bcl.2.M.V_GBL.9014998	1.21514	0.105895
hsa-miR-507	GSK3B	GSK3alpha.beta_pS21_S9.R.V_GBL.9014876	0.818688	0.0215281
hsa-miR-507	RPS6KB1	p70S6K_pT389.R.V_GBL.9014905	0.375371	2.36814e-05
hsa-miR-507	SNAI2	Snail.M.C_GBL.9014965	1.28181	0.139453
hsa-miR-515-3p	YAP1	YAP_pS127.R.C_GBL.9014935	0.919998	0.157073
hsa-miR-516b-5p	STAT3	STAT3_pY705.R.V_GBL.9014927	0.999208	0.494957
hsa-miR-518a-5p	CTNNB1	beta.Catenin.R.V_GBL.9014836	0.909401	0.105386
hsa-miR-518a-5p	GSK3B	GSK3alpha.beta_pS21_S9.R.V_GBL.9014876	0.916252	0.108139
hsa-miR-518a-5p	RPS6KB1	p70S6K_pT389.R.V_GBL.9014905	0.91751	0.00886948
hsa-miR-518a-5p	STMN1	Stathmin.R.V_GBL.9014929	1.22526	0.00795709
hsa-miR-518d-5p	AKT3	Akt_pS473.R.V_GBL.9014825	0.655183	0.0200567
hsa-miR-519d	BCL2L11	Bim.R.V_GBL.9014838	1.15981	0.0205235
hsa-miR-519d	BECN1	Beclin.G.V_GBL.9014969	0.822446	0.0483423
hsa-miR-519d	CCND1	Cyclin.D1.R.V_GBL.9014859	0.803945	0.049044
hsa-miR-519d	CDKN1A	p21.R.C_GBL.9014898	0.829	0.027849
hsa-miR-519d	NCOA3	AIB1.M.V_GBL.9014940	0.982363	0.345407
hsa-miR-519d	PIK3R1	PI3K.p85.R.V_GBL.9014913	1.00877	0.39459
hsa-miR-519d	PTK2	FAK.R.C_GBL.9014871	0.968752	0.146046
hsa-miR-519d	RB1	Rb.M.V_GBL.9014952	0.881295	0.0943684
hsa-miR-519d	RPS6KA1	p90RSK_pT359_S363.R.C_GBL.9014907	0.78704	0.0205221
hsa-miR-519d	SMAD1	Smad1.R.V_GBL.9014923	0.811878	0.0458972
hsa-miR-520b	BCL2L11	Bim.R.V_GBL.9014838	1.14781	0.0249025
hsa-miR-520b	ESR1	ER.alpha.R.V_GBL.9014870	0.954795	0.43767
hsa-miR-520b	IGF1R	IGF.1R.beta.R.C_GBL.9014883	0.935079	0.00800845
hsa-miR-520b	NCOA3	AIB1.M.V_GBL.9014940	1.18152	0.0101789
hsa-miR-520b	PECAM1	CD31.M.V_GBL.9014946	0.995588	0.446001
hsa-miR-520b	PIK3CA	PI3K.p110.alpha.R.C_GBL.9014912	0.791429	0.0276292
hsa-miR-526b-3p	AKT3	Akt.R.V_GBL.9014827	0.895708	0.0529141
hsa-miR-526b-3p	BCL2L11	Bim.R.V_GBL.9014838	1.22176	0.00869105
hsa-miR-526b-3p	BECN1	Beclin.G.V_GBL.9014969	0.724988	0.0171051
hsa-miR-526b-3p	CCND1	Cyclin.D1.R.V_GBL.9014859	0.923995	0.212576
hsa-miR-526b-3p	CDKN1A	p21.R.C_GBL.9014898	0.818848	0.0242082
hsa-miR-526b-3p	ESR1	ER.alpha_pS118.R.V_GBL.9014869	0.932906	0.0133614
hsa-miR-526b-3p	NCOA3	AIB1.M.V_GBL.9014940	1.01636	0.355805
hsa-miR-526b-3p	PIK3R1	PI3K.p85.R.V_GBL.9014913	0.878932	0.0136922
hsa-miR-526b-3p	PTK2	FAK.R.C_GBL.9014871	0.857971	0.00511154
hsa-miR-526b-3p	RB1	Rb_pS807_S811.R.V_GBL.9014920	0.894598	0.101778
hsa-miR-526b-3p	SMAD1	Smad1.R.V_GBL.9014923	0.83079	0.0574549
hsa-miR-526b-3p	STAT3	STAT3_pY705.R.V_GBL.9014927	1.11311	0.072412
hsa-miR-539-5p	AKT3	Akt_pS473.R.V_GBL.9014825	0.436517	0.0053973
hsa-miR-539-5p	BCL2L11	Bim.R.V_GBL.9014838	1.76752	0.000240013
hsa-miR-539-5p	CAV1	Caveolin.1.R.V_GBL.9014842	0.864469	0.144237
hsa-miR-539-5p	EIF4E	eIF4E.R.V_GBL.9014868	1.11988	0.128331
hsa-miR-539-5p	FN1	Fibronectin.R.C_GBL.9014872	1.07472	0.254223
hsa-miR-539-5p	FOXO3	FOXO3a.R.C_GBL.9014874	0.823106	0.0659597
hsa-miR-539-5p	MAPK14	p38_MAPK.R.C_GBL.9014902	0.772682	0.0341371
hsa-miR-539-5p	PRKAA1	AMPK.alpha.R.C_GBL.9014828	1.00658	0.477157
hsa-miR-539-5p	PTEN	PTEN.R.V_GBL.9014918	1.20161	0.0231229
hsa-miR-539-5p	RB1	Rb_pS807_S811.R.V_GBL.9014920	0.885082	0.0877097
hsa-miR-539-5p	YBX1	YB.1_pS102.R.V_GBL.9014934	1.16923	0.12237
hsa-miR-542-3p	GSK3B	GSK3.alpha.beta.M.V_GBL.9014954	0.894238	0.0210282
hsa-miR-542-3p	MAP2K1	MEK1.R.V_GBL.9014890	0.874825	0.0256893
hsa-miR-542-3p	PTEN	PTEN.R.V_GBL.9014918	0.995663	0.474052
hsa-miR-552	CAV1	Caveolin.1.R.V_GBL.9014842	0.454554	0.00698811
hsa-miR-552	IGF1R	IGF.1R.beta.R.C_GBL.9014883	0.965599	0.0397985
hsa-miR-552	MAPK9	JNK2.R.C_GBL.9014886	1.04033	0.394078
hsa-miR-552	RPS6KB1	p70S6K.R.V_GBL.9014906	0.667868	0.00807485
hsa-miR-552	YBX1	YB.1_pS102.R.V_GBL.9014934	1.47859	0.0132886
hsa-miR-561-3p	AKT3	Akt_pS473.R.V_GBL.9014825	0.398953	0.00450307
hsa-miR-561-3p	BCL2L11	Bim.R.V_GBL.9014838	1.11945	0.0410333
hsa-miR-561-3p	CHEK1	Chk1_pS345.R.C_GBL.9014845	0.958088	0.268377
hsa-miR-561-3p	CTNNB1	beta.Catenin.R.V_GBL.9014836	0.927277	0.146257
hsa-miR-561-3p	KIT	c.Kit.R.V_GBL.9014850	1.23374	0.265765
hsa-miR-561-3p	PIK3CA	PI3K.p110.alpha.R.C_GBL.9014912	0.943797	0.235434
hsa-miR-561-3p	PTEN	PTEN.R.V_GBL.9014918	1.05353	0.223617
hsa-miR-561-3p	RPS6KB1	p70S6K_pT389.R.V_GBL.9014905	0.81121	0.000834553
hsa-miR-567	GATA3	GATA3.M.V_GBL.9014953	0.994337	0.439164
hsa-miR-567	PTEN	PTEN.R.V_GBL.9014918	1.04066	0.277476
hsa-miR-570-3p	BECN1	Beclin.G.V_GBL.9014969	1.03324	0.342418
hsa-miR-570-3p	CDH2	N.Cadherin.R.V_GBL.9014893	1.06556	0.110047
hsa-miR-570-3p	CTNNB1	beta.Catenin.R.V_GBL.9014836	0.891102	0.0762743
hsa-miR-570-3p	ERRFI1	MIG.6.M.V_GBL.9014957	1.11536	0.0208388
hsa-miR-570-3p	FOXO3	FOXO3a.R.C_GBL.9014874	0.772618	0.038707
hsa-miR-570-3p	GSK3B	GSK3.alpha.beta.M.V_GBL.9014954	0.967724	0.187079
hsa-miR-570-3p	IRS1	IRS1.R.V_GBL.9014885	0.812656	0.00124655
hsa-miR-570-3p	MET	c.Met.M.C_GBL.9014985	0.925675	0.0935299
hsa-miR-570-3p	PTCH1	PTCH.R.C_GBL.9014917	1.22622	0.00351531
hsa-miR-570-3p	PTEN	PTEN.R.V_GBL.9014918	1.02707	0.344481
hsa-miR-570-3p	SMAD1	Smad1.R.V_GBL.9014923	0.887967	0.120427
hsa-miR-570-3p	YWHAE	X14.3.3_epsilon.M.C_GBL.9014939	0.937237	0.145373
hsa-miR-582-5p	CDH2	N.Cadherin.R.V_GBL.9014893	0.969503	0.262152
hsa-miR-582-5p	GSK3B	GSK3alpha.beta_pS21_S9.R.V_GBL.9014876	0.816807	0.0209799
hsa-miR-582-5p	MET	c.Met_pY1235.R.C_GBL.9014852	0.894925	0.0119482
hsa-miR-582-5p	NOTCH1	Notch1.R.V_GBL.9014896	1.05601	0.169326
hsa-miR-582-5p	PTCH1	PTCH.R.C_GBL.9014917	1.11859	0.0201967
hsa-miR-582-5p	PTEN	PTEN.R.V_GBL.9014918	0.961713	0.288465
hsa-miR-582-5p	PTK2	FAK.R.C_GBL.9014871	0.918675	0.022556
hsa-miR-582-5p	RB1	Rb_pS807_S811.R.V_GBL.9014920	0.812757	0.0317941
hsa-miR-582-5p	SMAD1	Smad1.R.V_GBL.9014923	0.886257	0.117661
hsa-miR-584-5p	PRKAA1	AMPK.alpha.R.C_GBL.9014828	0.814625	0.0890441
hsa-miR-584-5p	PTEN	PTEN.R.V_GBL.9014918	0.924528	0.153209
hsa-miR-584-5p	RPS6KB1	p70S6K.R.V_GBL.9014906	0.995158	0.473706
hsa-miR-624-5p	AKT3	Akt_pS473.R.V_GBL.9014825	0.509806	0.00793577
hsa-miR-624-5p	CDH2	N.Cadherin.R.V_GBL.9014893	0.938132	0.12048
hsa-miR-624-5p	GSK3B	GSK3alpha.beta_pS21_S9.R.V_GBL.9014876	0.646584	0.00355479
hsa-miR-624-5p	MAP2K1	MEK1.R.V_GBL.9014890	0.668599	0.00181177
hsa-miR-624-5p	MET	c.Met_pY1235.R.C_GBL.9014852	0.767999	0.0012833
hsa-miR-624-5p	SMAD3	Smad3.R.V_GBL.9014924	0.919673	0.139272
hsa-miR-624-5p	WWTR1	TAZ_pS89.R.C_GBL.9014930	1.0622	0.214495
hsa-miR-625-5p	AKT3	Akt_pS473.R.V_GBL.9014825	0.813566	0.0783115
hsa-miR-625-5p	BCL2L11	Bim.R.V_GBL.9014838	0.951383	0.18573
hsa-miR-625-5p	STAT3	STAT3_pY705.R.V_GBL.9014927	0.905127	0.0993496
hsa-miR-629-3p	PTCH1	PTCH.R.C_GBL.9014917	1.12444	0.0178776
hsa-miR-647	PRKAA1	AMPK.alpha.R.C_GBL.9014828	0.953602	0.345345
hsa-miR-653	CDH2	N.Cadherin.R.V_GBL.9014893	1.16648	0.014735
hsa-miR-653	PTEN	PTEN.R.V_GBL.9014918	0.789976	0.0208862
hsa-miR-653	RPS6KB1	p70S6K.R.V_GBL.9014906	0.952055	0.264667
hsa-miR-654-3p	AKT3	Akt_pS473.R.V_GBL.9014825	0.389726	0.00431368
hsa-miR-665	ERBB3	HER3_pY1298.R.C_GBL.9014880	1.25859	0.00450359
hsa-miR-665	KDR	VEGFR2.R.V_GBL.9014932	0.937684	0.319339
hsa-miR-7-5p	EIF4E	eIF4E.R.V_GBL.9014868	1.09966	0.16467
hsa-miR-7-5p	IGF1R	IGF.1R.beta.R.C_GBL.9014883	1.08636	0.00360899
hsa-miR-7-5p	IRS1	IRS1.R.V_GBL.9014885	0.769642	0.000679469
hsa-miR-7-5p	PARP1	PARP_cleaved.M.C_GBL.9014960	0.94268	0.0804794
hsa-miR-7-5p	PTK2	FAK.pY397_GBL.9014963	1.12333	0.0194938
hsa-miR-7-5p	RAF1	C.Raf_pS338.R.C_GBL.9014856	0.986029	0.467564
hsa-miR-7-5p	RB1	Rb_pS807_S811.R.V_GBL.9014920	0.877479	0.078056
hsa-miR-7-5p	RPS6KB1	p70S6K.R.V_GBL.9014906	0.986231	0.425819
hsa-miR-7-5p	XIAP	XIAP.R.C_GBL.9014933	0.9717	0.331264
hsa-miR-760	MAP2K1	MEK1.R.V_GBL.9014890	0.919186	0.067552
hsa-miR-874	GSK3B	GSK3.alpha.beta.M.V_GBL.9014954	0.801264	0.00384068
hsa-miR-876-3p	GSK3B	GSK3alpha.beta_pS21_S9.R.V_GBL.9014876	0.78644	0.0141661
hsa-miR-891a	SMAD1	Smad1.R.V_GBL.9014923	0.913563	0.171225
hsa-miR-924	PIK3R1	PI3K.p85.R.V_GBL.9014913	0.995448	0.44453
hsa-miR-92a-2-5p	MET	c.Met_pY1235.R.C_GBL.9014852	1.03789	0.11154
hsa-miR-93-3p	PIK3CA	PI3K.p110.alpha.R.C_GBL.9014912	1.01971	0.395827
hsa-miR-93-3p	PRKAA1	AMPK.alpha.R.C_GBL.9014828	0.976411	0.418956
hsa-miR-93-3p	WWTR1	TAZ_pS89.R.C_GBL.9014930	1.00702	0.46224
hsa-miR-938	KIT	c.Kit.R.V_GBL.9014850	1.10294	0.38823
hsa-miR-9-3p	BAK1	Bak.R.C_GBL.9014832	0.915088	0.0836686
hsa-miR-9-3p	BECN1	Beclin.G.V_GBL.9014969	0.999807	0.499046
hsa-miR-9-3p	CASP7	Caspase.7_cleavedD198.R.C_GBL.9014840	0.717694	0.0781796
hsa-miR-9-3p	CDH2	N.Cadherin.R.V_GBL.9014893	1.08192	0.0745577
hsa-miR-9-3p	IGF1R	IGF.1R.beta.R.C_GBL.9014883	0.913848	0.0036342
hsa-miR-9-3p	PIK3CA	PI3K.p110.alpha.R.C_GBL.9014912	0.88299	0.0925908
hsa-miR-9-3p	PIK3R1	PI3K.p85.R.V_GBL.9014913	0.864996	0.0102515
hsa-miR-9-3p	PTEN	PTEN.R.V_GBL.9014918	0.993404	0.460597
hsa-miR-9-3p	RB1	Rb_pS807_S811.R.V_GBL.9014920	0.7308	0.0128021
hsa-miR-9-3p	RPS6KB1	p70S6K.R.V_GBL.9014906	1.01045	0.44347
hsa-miR-9-3p	SMAD1	Smad1.R.V_GBL.9014923	0.911513	0.166441
hsa-miR-9-3p	SNAI2	Snail.M.C_GBL.9014965	1.19871	0.210521
hsa-miR-9-3p	WWTR1	TAZ_pS89.R.C_GBL.9014930	0.95068	0.260916
hsa-miR-942	AKT3	Akt_pS473.R.V_GBL.9014825	0.655926	0.0201658
hsa-miR-942	CHEK1	Chk1.R.C_GBL.9014975	0.824495	0.271893
hsa-miR-942	EIF4E	eIF4E.R.V_GBL.9014868	0.95692	0.325024
hsa-miR-942	GSK3B	GSK3.alpha.beta.M.V_GBL.9014954	0.959984	0.14354

## Sheet: Validated Step III Interaction
MiRNA	Gene Symbol	Antibody	Fold Change	Pval (one-tail)
hsa-let-7a-3p	GATA3	GATA3.M.V_GBL.9014953	0.798667	0.00481257
hsa-let-7a-3p	GSK3B	GSK3alpha.beta_pS21_S9.R.V_GBL.9014876	0.711891	0.00631247
hsa-let-7a-3p	IRS1	IRS1.R.V_GBL.9014885	0.733014	0.000439348
hsa-let-7a-3p	PTCH1	PTCH.R.C_GBL.9014917	0.896708	0.0283564
hsa-let-7a-3p	RPS6KB1	p70S6K_pT389.R.V_GBL.9014905	0.958474	0.0483927
hsa-let-7a-3p	WWTR1	TAZ_pS89.R.C_GBL.9014930	0.836932	0.0483187
hsa-let-7a-5p	EEF2K	eEF2K.R.V_GBL.9014863	0.718105	0.00298127
hsa-let-7a-5p	IGF1R	IGF.1R.beta.R.C_GBL.9014883	0.843958	0.000646924
hsa-let-7a-5p	MYC	c.Myc.R.C_GBL.9014853	0.847756	0.00216715
hsa-let-7d-5p	BCL2L1	Bcl.X.R.V_GBL.9014835	0.877974	0.0377014
hsa-let-7d-5p	IGF1R	IGF.1R.beta.R.C_GBL.9014883	0.830984	0.000510987
hsa-let-7g-3p	CCNB1	Cyclin.B1.R.V_GBL.9014858	0.360995	0.000433951
hsa-let-7g-3p	PTK2	FAK.pY397_GBL.9014963	0.653787	0.00110424
hsa-let-7g-3p	RB1	Rb_pS807_S811.R.V_GBL.9014920	0.517332	0.00253142
hsa-let-7g-3p	YWHAE	X14.3.3_epsilon.M.C_GBL.9014939	0.845372	0.0255942
hsa-let-7g-5p	IGF1R	IGF.1R.beta.R.C_GBL.9014883	0.85443	0.000793849
hsa-miR-101-3p	GSK3B	GSK3.alpha.beta.M.V_GBL.9014954	0.828714	0.00583295
hsa-miR-101-3p	MAPK1	MAPK_pT202_Y204.R.V_GBL.9014888	0.872772	0.00697893
hsa-miR-101-3p	MET	c.Met_pY1235.R.C_GBL.9014852	0.739642	0.000915466
hsa-miR-101-3p	PTCH1	PTCH.R.C_GBL.9014917	0.849487	0.0108677
hsa-miR-101-3p	STMN1	Stathmin.R.V_GBL.9014929	0.875377	0.0358893
hsa-miR-101-5p	RPS6KB1	p70S6K.R.V_GBL.9014906	0.778598	0.0232993
hsa-miR-103a-3p	CCNE1	Cyclin_E1.M.V_GBL.9014986	0.829853	0.00642806
hsa-miR-106a-5p	AKT3	Akt_pS473.R.V_GBL.9014825	0.709957	0.0306111
hsa-miR-106a-5p	SMAD4	Smad4.M.V_GBL.9014964	0.881297	0.0397111
hsa-miR-106a-5p	SRC	Src_pY416.R.C_GBL.9014925	0.811282	0.0288905
hsa-miR-106b-5p	CDKN1A	p21.R.C_GBL.9014898	0.693085	0.00602643
hsa-miR-106b-5p	NCOA3	AIB1.M.V_GBL.9014940	0.805391	0.00842964
hsa-miR-106b-5p	RPS6KA1	p90RSK_pT359_S363.R.C_GBL.9014907	0.849753	0.0466032
hsa-miR-106b-5p	SMAD1	Smad1.R.V_GBL.9014923	0.771315	0.029379
hsa-miR-107	CCNE1	Cyclin_E1.M.V_GBL.9014950	0.662428	0.00297386
hsa-miR-10b-3p	GSK3B	GSK3.alpha.beta.M.V_GBL.9014954	0.855216	0.00925724
hsa-miR-10b-3p	RB1	Rb_pS807_S811.R.V_GBL.9014920	0.835684	0.0428483
hsa-miR-124-3p	AKT3	Akt_pS473.R.V_GBL.9014825	0.65668	0.0202773
hsa-miR-124-3p	ERBB3	HER3_pY1298.R.C_GBL.9014880	0.887763	0.0391226
hsa-miR-124-3p	MAPK14	p38_pT180_Y182.R.V_GBL.9014903	0.248641	0.000699831
hsa-miR-1245a	CAV1	Caveolin.1.R.V_GBL.9014842	0.476042	0.00780418
hsa-miR-1245a	GSK3B	GSK3.alpha.beta.M.V_GBL.9014954	0.66195	0.000824275
hsa-miR-125a-5p	AKT3	Akt_pS473.R.V_GBL.9014825	0.606935	0.014333
hsa-miR-125a-5p	EIF4EBP1	X4EBP1_pT37.R.V_GBL.9014820	0.825872	0.0174469
hsa-miR-125b-2-3p	GSK3B	GSK3.alpha.beta.M.V_GBL.9014954	0.898732	0.0234233
hsa-miR-126-3p	IRS1	IRS1.R.V_GBL.9014885	0.770663	0.000688428
hsa-miR-126-3p	MET	c.Met_pY1235.R.C_GBL.9014852	0.649181	0.000379595
hsa-miR-1285-3p	CAV1	Caveolin.1.R.V_GBL.9014842	0.423971	0.00600843
hsa-miR-129-5p	GSK3B	GSK3alpha.beta_pS21_S9.R.V_GBL.9014876	0.826037	0.0238518
hsa-miR-129-5p	MAPK1	MAPK_pT202_Y204.R.V_GBL.9014888	0.724828	0.000761713
hsa-miR-129-5p	RPS6KB1	p70S6K.R.V_GBL.9014906	0.371775	0.00131876
hsa-miR-136-3p	AKT3	Akt_pS473.R.V_GBL.9014825	0.698055	0.027811
hsa-miR-145-5p	PTK2	FAK.R.C_GBL.9014871	0.736585	0.000861168
hsa-miR-145-5p	RPS6KB1	p70S6K.R.V_GBL.9014906	0.818053	0.0371619
hsa-miR-145-5p	SMAD3	Smad3.R.V_GBL.9014924	0.839658	0.039005
hsa-miR-148a-3p	ERRFI1	MIG.6.M.V_GBL.9014957	0.887986	0.0224267
hsa-miR-148a-3p	IRS1	IRS1.R.V_GBL.9014885	0.80797	0.00115969
hsa-miR-148a-3p	MET	c.Met_pY1235.R.C_GBL.9014852	0.845874	0.00416676
hsa-miR-148a-3p	PRKAA1	AMPK_pT172.R.V_GBL.9014829	0.739187	0.00128979
hsa-miR-148b-3p	CDKN1B	p27.R.V_GBL.9014937	0.738368	0.0395237
hsa-miR-148b-3p	IRS1	IRS1.R.V_GBL.9014885	0.774661	0.000725043
hsa-miR-148b-3p	MET	c.Met_pY1235.R.C_GBL.9014852	0.897305	0.0126954
hsa-miR-148b-3p	PIK3CA	PI3K.p110.alpha.R.C_GBL.9014912	0.807827	0.0335412
hsa-miR-148b-3p	PIK3R1	PI3K.p85.R.V_GBL.9014913	0.920482	0.0385001
hsa-miR-148b-3p	PRKAA1	AMPK.alpha.R.C_GBL.9014828	0.704429	0.0341167
hsa-miR-151a-3p	AKT3	Akt_pS473.R.V_GBL.9014825	0.453195	0.0058691
hsa-miR-153	AKT3	Akt_pS473.R.V_GBL.9014825	0.572535	0.0114873
hsa-miR-153	IGF1R	IGF.1R.beta.R.C_GBL.9014883	0.960117	0.0282136
hsa-miR-153	RPS6KB1	p70S6K_pT389.R.V_GBL.9014905	0.630311	0.000113639
hsa-miR-15b-5p	ACACA	ACC_pS79.R.V_GBL.9014843	0.827091	0.0491612
hsa-miR-15b-5p	CCNE1	Cyclin_E1.M.V_GBL.9014950	0.788587	0.0109225
hsa-miR-15b-5p	MAP2K1	MEK1.R.V_GBL.9014890	0.812724	0.00906596
hsa-miR-15b-5p	PTCH1	PTCH.R.C_GBL.9014917	0.803604	0.00523983
hsa-miR-15b-5p	RAF1	C.Raf.R.V_GBL.9014857	0.709395	0.0177641
hsa-miR-17-5p	CCND1	Cyclin.D1.R.V_GBL.9014859	0.771721	0.0349298
hsa-miR-17-5p	MYC	c.Myc.R.C_GBL.9014853	0.900019	0.00712066
hsa-miR-181b-5p	AKT3	Akt_pS473.R.V_GBL.9014825	0.581676	0.0121664
hsa-miR-181b-5p	CDKN1B	p27_pT157.R.C_GBL.9014899	0.033038	0.000316835
hsa-miR-18a-3p	CAV1	Caveolin.1.R.V_GBL.9014842	0.703679	0.0335524
hsa-miR-18a-5p	AKT3	Akt_pS473.R.V_GBL.9014825	0.514506	0.00814758
hsa-miR-18a-5p	GAB2	GAB2.R.V_GBL.9014875	0.526127	0.000141424
hsa-miR-18a-5p	MET	c.Met_pY1235.R.C_GBL.9014852	0.920692	0.0245435
hsa-miR-18a-5p	RAF1	C.Raf.R.V_GBL.9014857	0.736414	0.0227074
hsa-miR-18a-5p	RB1	Rb_pS807_S811.R.V_GBL.9014920	0.685984	0.00846885
hsa-miR-18b-5p	AKT3	Akt_pS473.R.V_GBL.9014825	0.565863	0.0110222
hsa-miR-18b-5p	GAB2	GAB2.R.V_GBL.9014875	0.5458	0.000160478
hsa-miR-18b-5p	RB1	Rb_pS807_S811.R.V_GBL.9014920	0.790587	0.024297
hsa-miR-190a	CDKN1B	p27.R.V_GBL.9014937	0.72838	0.0362954
hsa-miR-190a	PTCH1	PTCH.R.C_GBL.9014917	0.863387	0.0140449
hsa-miR-195-3p	MYC	c.Myc.R.C_GBL.9014853	0.916697	0.0116748
hsa-miR-195-3p	PIK3R1	PI3K.p85.R.V_GBL.9014913	0.90481	0.0251982
hsa-miR-199b-5p	GSK3B	GSK3alpha.beta_pS21_S9.R.V_GBL.9014876	0.830033	0.0252492
hsa-miR-199b-5p	MET	c.Met_pY1235.R.C_GBL.9014852	0.83465	0.00341315
hsa-miR-199b-5p	PXN	Paxillin.R.V_GBL.9014908	0.705604	0.00557059
hsa-miR-19a-3p	MAPK1	MAPK_pT202_Y204.R.V_GBL.9014888	0.896366	0.0121598
hsa-miR-19a-3p	MAPK14	p38_pT180_Y182.R.V_GBL.9014903	0.789157	0.0239926
hsa-miR-19a-3p	PRKAA1	AMPK_pT172.R.V_GBL.9014829	0.928713	0.041629
hsa-miR-19a-3p	PTEN	PTEN.R.V_GBL.9014918	0.853516	0.0485045
hsa-miR-19a-3p	RAF1	C.Raf.R.V_GBL.9014857	0.703665	0.0168977
hsa-miR-19b-1-5p	AKT3	Akt_pS473.R.V_GBL.9014825	0.551762	0.0101168
hsa-miR-19b-3p	MAPK1	MAPK_pT202_Y204.R.V_GBL.9014888	0.821438	0.00268379
hsa-miR-19b-3p	PIK3CA	PI3K.p110.alpha.R.C_GBL.9014912	0.801087	0.0309361
hsa-miR-19b-3p	RAF1	C.Raf.R.V_GBL.9014857	0.594111	0.00730482
hsa-miR-205-5p	ERRFI1	MIG.6.M.V_GBL.9014957	0.722087	0.00186325
hsa-miR-205-5p	GATA3	GATA3.M.V_GBL.9014953	0.905009	0.034108
hsa-miR-206	MAPK1	MAPK_pT202_Y204.R.V_GBL.9014888	0.735094	0.000851866
hsa-miR-206	MAPK3	MAPK_pT202_Y204.R.V_GBL.9014888	0.735094	0.000851866
hsa-miR-206	MET	c.Met_pY1235.R.C_GBL.9014852	0.748898	0.00101806
hsa-miR-20a-5p	AKT3	Akt_pS473.R.V_GBL.9014825	0.705929	0.0296254
hsa-miR-20a-5p	ESR1	ER.alpha_pS118.R.V_GBL.9014869	0.890758	0.00349407
hsa-miR-20a-5p	MYC	c.Myc.R.C_GBL.9014853	0.9494	0.0400798
hsa-miR-20a-5p	RPS6KA1	p90RSK_pT359_S363.R.C_GBL.9014907	0.836986	0.0388913
hsa-miR-20a-5p	XIAP	XIAP.R.C_GBL.9014933	0.794635	0.0197316
hsa-miR-20b-5p	PIK3R1	PI3K.p85.R.V_GBL.9014913	0.909172	0.0282264
hsa-miR-20b-5p	RB1	Rb_pS807_S811.R.V_GBL.9014920	0.82262	0.0360544
hsa-miR-20b-5p	RPS6KA1	p90RSK_pT359_S363.R.C_GBL.9014907	0.846914	0.0447364
hsa-miR-214-3p	ERRFI1	MIG.6.M.V_GBL.9014957	0.634825	0.000839175
hsa-miR-214-3p	GSK3B	GSK3alpha.beta_pS21_S9.R.V_GBL.9014876	0.71335	0.00640189
hsa-miR-21-5p	AKT3	Akt_pS473.R.V_GBL.9014825	0.500496	0.00753701
hsa-miR-217	AKT3	Akt_pS473.R.V_GBL.9014825	0.437036	0.00541121
hsa-miR-217	FOXO3	FOXO3a.R.C_GBL.9014874	0.672744	0.01595
hsa-miR-218-5p	RPS6KB1	p70S6K.R.V_GBL.9014906	0.769458	0.021071
hsa-miR-219-5p	GSK3B	GSK3.alpha.beta.M.V_GBL.9014954	0.831009	0.00605595
hsa-miR-219-5p	NFKB1	NF.kB.p65_pS536.R.C_GBL.9014895	0.812667	0.00987039
hsa-miR-219-5p	PTEN	PTEN.R.V_GBL.9014918	0.805087	0.0251225
hsa-miR-221-3p	CTNNB1	beta.Catenin.R.V_GBL.9014836	0.635914	0.00390421
hsa-miR-221-3p	ERBB3	HER3.R.V_GBL.9014881	0.785482	0.0256801
hsa-miR-221-3p	PTK2	FAK.pY397_GBL.9014963	0.773387	0.0037569
hsa-miR-222-3p	CTNNB1	beta.Catenin.R.V_GBL.9014836	0.785433	0.0164696
hsa-miR-222-3p	PTK2	FAK.R.C_GBL.9014871	0.899178	0.0130096
hsa-miR-222-3p	YWHAE	X14.3.3_epsilon.M.C_GBL.9014939	0.864619	0.035087
hsa-miR-22-3p	AKT3	Akt_pS473.R.V_GBL.9014825	0.400312	0.00453188
hsa-miR-22-3p	ERBB3	HER3.R.V_GBL.9014881	0.764482	0.020383
hsa-miR-22-3p	MAPK14	p38_MAPK.R.C_GBL.9014902	0.791709	0.0416506
hsa-miR-224-3p	GAB2	GAB2.R.V_GBL.9014875	0.574714	0.000195212
hsa-miR-224-3p	MAP2K1	MEK1.R.V_GBL.9014890	0.816517	0.00958212
hsa-miR-224-3p	NOTCH1	Notch1.R.V_GBL.9014896	0.854641	0.0300771
hsa-miR-224-3p	RB1	Rb_pS807_S811.R.V_GBL.9014920	0.641609	0.00588416
hsa-miR-24-3p	AKT3	Akt_pS473.R.V_GBL.9014825	0.546114	0.00978122
hsa-miR-24-3p	CDKN1B	p27_pT157.R.C_GBL.9014899	0.797056	0.025359
hsa-miR-26a-5p	CTNNB1	beta.Catenin.R.V_GBL.9014836	0.78586	0.0165543
hsa-miR-26a-5p	PTEN	PTEN.R.V_GBL.9014918	0.745189	0.0126953
hsa-miR-26a-5p	SMAD1	Smad1.R.V_GBL.9014923	0.800857	0.0404651
hsa-miR-29a-3p	AKT3	Akt_pS473.R.V_GBL.9014825	0.438247	0.00544387
hsa-miR-29a-3p	NCOA3	AIB1.M.V_GBL.9014940	0.809183	0.00889325
hsa-miR-29a-3p	PIK3R1	PI3K.p85.R.V_GBL.9014913	0.859535	0.0092112
hsa-miR-29b-3p	AKT3	Akt_pS473.R.V_GBL.9014825	0.469294	0.00637701
hsa-miR-29b-3p	BAK1	Bak.R.C_GBL.9014832	0.840452	0.0211017
hsa-miR-29b-3p	IRS1	IRS1.R.V_GBL.9014885	0.718469	0.000375445
hsa-miR-29b-3p	NCOA3	AIB1.M.V_GBL.9014940	0.787949	0.00665989
hsa-miR-29c-3p	AKT3	Akt_pS473.R.V_GBL.9014825	0.403409	0.00459846
hsa-miR-29c-3p	BAK1	Bak.R.C_GBL.9014832	0.821044	0.0157559
hsa-miR-29c-3p	FOXO3	FOXO3a.R.C_GBL.9014874	0.794805	0.0485594
hsa-miR-29c-3p	NCOA3	AIB1.M.V_GBL.9014940	0.746076	0.00402129
hsa-miR-30d-5p	WWTR1	TAZ_pS89.R.C_GBL.9014930	0.706555	0.0115486
hsa-miR-323b-5p	GSK3B	GSK3.alpha.beta.M.V_GBL.9014954	0.747935	0.00194232
hsa-miR-32-3p	YWHAE	X14.3.3_epsilon.M.C_GBL.9014939	0.876704	0.0433434
hsa-miR-335-5p	IRS1	IRS1.R.V_GBL.9014885	0.925337	0.01627
hsa-miR-335-5p	MET	c.Met_pY1235.R.C_GBL.9014852	0.827456	0.00302246
hsa-miR-34a-5p	BCL2	Bcl.2.M.V_GBL.9014998	0.636326	0.0377095
hsa-miR-34a-5p	MAP2K1	MEK1.R.V_GBL.9014890	0.657307	0.00164381
hsa-miR-34a-5p	MET	c.Met_pY1235.R.C_GBL.9014852	0.705495	0.000636931
hsa-miR-34b-3p	MET	c.Met.M.C_GBL.9014985	0.886843	0.040424
hsa-miR-34b-5p	AKT3	Akt_pS473.R.V_GBL.9014825	0.462195	0.00614623
hsa-miR-34b-5p	CTNNB1	beta.Catenin.R.V_GBL.9014836	0.824388	0.0271619
hsa-miR-34b-5p	GSK3B	GSK3alpha.beta_pS21_S9.R.V_GBL.9014876	0.758637	0.0102395
hsa-miR-34b-5p	MET	c.Met_pY1235.R.C_GBL.9014852	0.713859	0.000693406
hsa-miR-34b-5p	MYC	c.Myc.R.C_GBL.9014853	0.65681	0.000198073
hsa-miR-34b-5p	RPS6KB1	p70S6K_pT389.R.V_GBL.9014905	0.892261	0.00422775
hsa-miR-34c-5p	GATA3	GATA3.M.V_GBL.9014953	0.899073	0.0295786
hsa-miR-34c-5p	MAP2K1	MEK1.R.V_GBL.9014890	0.595053	0.00100963
hsa-miR-34c-5p	MET	c.Met_pY1235.R.C_GBL.9014852	0.757835	0.00113209
hsa-miR-365a-3p	AKT3	Akt.R.V_GBL.9014827	0.767593	0.00726518
hsa-miR-372	PIK3CA	PI3K.p110.alpha.R.C_GBL.9014912	0.79372	0.0283721
hsa-miR-373-3p	PIK3CA	PI3K.p110.alpha.R.C_GBL.9014912	0.744694	0.0166932
hsa-miR-421	ACACA	ACC1.R.C_GBL.9014824	0.684542	0.00150393
hsa-miR-421	AKT3	Akt_pS473.R.V_GBL.9014825	0.423633	0.0050663
hsa-miR-421	RPS6KB1	p70S6K.R.V_GBL.9014906	0.545226	0.00335294
hsa-miR-421	TP53BP1	X53BP1.R.C_GBL.9014822	0.766781	0.0189434
hsa-miR-429	ERRFI1	MIG.6.M.V_GBL.9014987	0.836991	0.0424304
hsa-miR-429	FN1	Fibronectin.R.C_GBL.9014872	0.635403	0.0177117
hsa-miR-429	PRKCA	PKC.alpha.M.V_GBL.9014962	0.828318	0.0221614
hsa-miR-429	RPS6KB1	p70S6K.R.V_GBL.9014906	0.813954	0.0353098
hsa-miR-429	XIAP	XIAP.R.C_GBL.9014933	0.851033	0.042367
hsa-miR-432-3p	PTK2	FAK.R.C_GBL.9014871	0.754095	0.00105381
hsa-miR-432-3p	YBX1	YB.1_pS102.R.V_GBL.9014934	0.716083	0.0470489
hsa-miR-454-3p	MET	c.Met_pY1235.R.C_GBL.9014852	0.802922	0.00206196
hsa-miR-454-3p	PRKAA1	AMPK_pT172.R.V_GBL.9014829	0.752616	0.00150476
hsa-miR-455-5p	RPS6KB1	p70S6K.R.V_GBL.9014906	0.682516	0.00912965
hsa-miR-494	MAP2K1	MEK1_pS217_S221.R.V_GBL.9014889	0.891183	0.0015154
hsa-miR-494	PTEN	PTEN.R.V_GBL.9014918	0.746003	0.0128029
hsa-miR-494	XIAP	XIAP.R.C_GBL.9014933	0.756341	0.012685
hsa-miR-505-3p	CHEK1	Chk1.R.C_GBL.9014846	0.874242	0.0103385
hsa-miR-505-3p	PTK2	FAK.pY397_GBL.9014963	0.910872	0.0422618
hsa-miR-506-3p	AKT3	Akt_pS473.R.V_GBL.9014825	0.498088	0.00743813
hsa-miR-506-3p	CDH2	N.Cadherin.R.V_GBL.9014893	0.886057	0.0373707
hsa-miR-507	AKT3	Akt_pS473.R.V_GBL.9014825	0.443626	0.0055921
hsa-miR-507	GSK3B	GSK3alpha.beta_pS21_S9.R.V_GBL.9014876	0.818688	0.0215281
hsa-miR-507	RPS6KB1	p70S6K_pT389.R.V_GBL.9014905	0.375371	2.36814e-05
hsa-miR-518a-5p	RPS6KB1	p70S6K_pT389.R.V_GBL.9014905	0.91751	0.00886948
hsa-miR-518d-5p	AKT3	Akt_pS473.R.V_GBL.9014825	0.655183	0.0200567
hsa-miR-519d	BECN1	Beclin.G.V_GBL.9014969	0.822446	0.0483423
hsa-miR-519d	CCND1	Cyclin.D1.R.V_GBL.9014859	0.803945	0.049044
hsa-miR-519d	CDKN1A	p21.R.C_GBL.9014898	0.829	0.027849
hsa-miR-519d	RPS6KA1	p90RSK_pT359_S363.R.C_GBL.9014907	0.78704	0.0205221
hsa-miR-519d	SMAD1	Smad1.R.V_GBL.9014923	0.811878	0.0458972
hsa-miR-520b	IGF1R	IGF.1R.beta.R.C_GBL.9014883	0.935079	0.00800845
hsa-miR-520b	PIK3CA	PI3K.p110.alpha.R.C_GBL.9014912	0.791429	0.0276292
hsa-miR-526b-3p	BECN1	Beclin.G.V_GBL.9014969	0.724988	0.0171051
hsa-miR-526b-3p	CDKN1A	p21.R.C_GBL.9014898	0.818848	0.0242082
hsa-miR-526b-3p	ESR1	ER.alpha_pS118.R.V_GBL.9014869	0.932906	0.0133614
hsa-miR-526b-3p	PIK3R1	PI3K.p85.R.V_GBL.9014913	0.878932	0.0136922
hsa-miR-526b-3p	PTK2	FAK.R.C_GBL.9014871	0.857971	0.00511154
hsa-miR-539-5p	AKT3	Akt_pS473.R.V_GBL.9014825	0.436517	0.0053973
hsa-miR-539-5p	MAPK14	p38_MAPK.R.C_GBL.9014902	0.772682	0.0341371
hsa-miR-542-3p	GSK3B	GSK3.alpha.beta.M.V_GBL.9014954	0.894238	0.0210282
hsa-miR-542-3p	MAP2K1	MEK1.R.V_GBL.9014890	0.874825	0.0256893
hsa-miR-552	CAV1	Caveolin.1.R.V_GBL.9014842	0.454554	0.00698811
hsa-miR-552	IGF1R	IGF.1R.beta.R.C_GBL.9014883	0.965599	0.0397985
hsa-miR-552	RPS6KB1	p70S6K.R.V_GBL.9014906	0.667868	0.00807485
hsa-miR-561-3p	AKT3	Akt_pS473.R.V_GBL.9014825	0.398953	0.00450307
hsa-miR-561-3p	RPS6KB1	p70S6K_pT389.R.V_GBL.9014905	0.81121	0.000834553
hsa-miR-570-3p	FOXO3	FOXO3a.R.C_GBL.9014874	0.772618	0.038707
hsa-miR-570-3p	IRS1	IRS1.R.V_GBL.9014885	0.812656	0.00124655
hsa-miR-582-5p	GSK3B	GSK3alpha.beta_pS21_S9.R.V_GBL.9014876	0.816807	0.0209799
hsa-miR-582-5p	MET	c.Met_pY1235.R.C_GBL.9014852	0.894925	0.0119482
hsa-miR-582-5p	PTK2	FAK.R.C_GBL.9014871	0.918675	0.022556
hsa-miR-582-5p	RB1	Rb_pS807_S811.R.V_GBL.9014920	0.812757	0.0317941
hsa-miR-624-5p	AKT3	Akt_pS473.R.V_GBL.9014825	0.509806	0.00793577
hsa-miR-624-5p	GSK3B	GSK3alpha.beta_pS21_S9.R.V_GBL.9014876	0.646584	0.00355479
hsa-miR-624-5p	MAP2K1	MEK1.R.V_GBL.9014890	0.668599	0.00181177
hsa-miR-624-5p	MET	c.Met_pY1235.R.C_GBL.9014852	0.767999	0.0012833
hsa-miR-653	PTEN	PTEN.R.V_GBL.9014918	0.789976	0.0208862
hsa-miR-654-3p	AKT3	Akt_pS473.R.V_GBL.9014825	0.389726	0.00431368
hsa-miR-7-5p	IRS1	IRS1.R.V_GBL.9014885	0.769642	0.000679469
hsa-miR-874	GSK3B	GSK3.alpha.beta.M.V_GBL.9014954	0.801264	0.00384068
hsa-miR-876-3p	GSK3B	GSK3alpha.beta_pS21_S9.R.V_GBL.9014876	0.78644	0.0141661
hsa-miR-9-3p	IGF1R	IGF.1R.beta.R.C_GBL.9014883	0.913848	0.0036342
hsa-miR-9-3p	PIK3R1	PI3K.p85.R.V_GBL.9014913	0.864996	0.0102515
hsa-miR-9-3p	RB1	Rb_pS807_S811.R.V_GBL.9014920	0.7308	0.0128021
hsa-miR-942	AKT3	Akt_pS473.R.V_GBL.9014825	0.655926	0.0201658
