# Supplementary material for: Cupid: simultaneous reconstruction of microRNA-target and ceRNA networks
Source: HighWire-hosted journal article supplement (doi:10.1101/gr.178194.114), 2014-11-05
Supplement: Table_S5.xlsx [file Table_S5.xlsx]

## Sheet: BRCA ceRNET
RNA1	RNA2	Num Direction	RNA1 -> RNA2	RNA1 <- RNA2
A1CF	FAT3	1	0	1
A1CF	SATB2	1	0	1
A1CF	SOX6	1	0	1
A1CF	ZNF367	1	0	1
A2LD1	ACBD5	1	0	1
A2LD1	CCND1	1	0	1
A2LD1	CCNJ	1	0	1
A2LD1	CDC25A	1	0	1
A2LD1	CDCA7	1	0	1
A2LD1	CERS6	1	0	1
A2LD1	CROT	1	0	1
A2LD1	FIBIN	1	0	1
A2LD1	KLF9	2	1	1
A2LD1	KPNA2	1	0	1
A2LD1	PTEN	1	0	1
A2LD1	REEP5	1	0	1
A2LD1	RUNX3	1	0	1
A2LD1	SLC39A6	1	0	1
A2LD1	TMEM25	1	0	1
AAK1	AHNAK	2	1	1
AAK1	BCL2L11	2	1	1
AAK1	C11orf82	2	1	1
AAK1	C3orf38	2	1	1
AAK1	CAPRIN2	2	1	1
AAK1	CPNE2	1	0	1
AAK1	ENPP5	1	0	1
AAK1	FRMD4A	2	1	1
AAK1	FYCO1	2	1	1
AAK1	GMCL1	2	1	1
AAK1	HBP1	2	1	1
AAK1	HOOK3	2	1	1
AAK1	ITFG1	2	1	1
AAK1	MAP3K9	2	1	1
AAK1	MASTL	2	1	1
AAK1	MTPAP	2	1	1
AAK1	NBEAL1	2	1	1
AAK1	POLR3G	1	0	1
AAK1	ROCK2	2	1	1
AAK1	SLC35F5	2	1	1
AAK1	TAGAP	1	1	0
AAK1	ZBTB4	2	1	1
AAK1	ZNFX1	2	1	1
AASDHPPT	RPAP3	2	1	1
AATK	KLF5	1	0	1
ABAT	CCNG2	2	1	1
ABAT	FOXN3	1	1	0
ABAT	NPAT	1	1	0
ABAT	SEZ6L	1	1	0
ABAT	ZBTB34	1	1	0
ABCA1	ABCB7	2	1	1
ABCA1	ABI1	2	1	1
ABCA1	ACBD5	2	1	1
ABCA1	ACVR1	2	1	1
ABCA1	ACVR1C	2	1	1
ABCA1	ADAM12	1	0	1
ABCA1	ADAM9	2	1	1
ABCA1	ADAMTS18	2	1	1
ABCA1	ADAMTSL3	2	1	1
ABCA1	AEBP2	2	1	1
ABCA1	AKAP11	2	1	1
ABCA1	AKAP7	2	1	1
ABCA1	AKAP9	2	1	1
ABCA1	AKTIP	1	1	0
ABCA1	ALCAM	1	0	1
ABCA1	ALS2CR8	2	1	1
ABCA1	ALX4	1	0	1
ABCA1	AMMECR1	2	1	1
ABCA1	ANK2	2	1	1
ABCA1	ANKIB1	2	1	1
ABCA1	ANKRD11	2	1	1
ABCA1	ANKRD12	2	1	1
ABCA1	ANKRD13C	2	1	1
ABCA1	ANKRD50	2	1	1
ABCA1	ANKRD52	2	1	1
ABCA1	ANO6	2	1	1
ABCA1	API5	2	1	1
ABCA1	APPL1	2	1	1
ABCA1	ARAP2	2	1	1
ABCA1	ARFGEF1	2	1	1
ABCA1	ARHGAP1	1	0	1
ABCA1	ARHGAP12	2	1	1
ABCA1	ARHGAP21	2	1	1
ABCA1	ARHGEF10	2	1	1
ABCA1	ARHGEF12	2	1	1
ABCA1	ARHGEF17	2	1	1
ABCA1	ARHGEF18	2	1	1
ABCA1	ARHGEF4	2	1	1
ABCA1	ARHGEF7	2	1	1
ABCA1	ARID4A	2	1	1
ABCA1	ARID4B	2	1	1
ABCA1	ARID5B	2	1	1
ABCA1	ARRDC3	2	1	1
ABCA1	ASAP1	2	1	1
ABCA1	ASH1L	2	1	1
ABCA1	ASXL2	2	1	1
ABCA1	ATAD2B	2	1	1
ABCA1	ATG14	2	1	1
ABCA1	ATG16L1	2	1	1
ABCA1	ATL2	2	1	1
ABCA1	ATL3	1	1	0
ABCA1	ATP11A	2	1	1
ABCA1	ATP2B1	2	1	1
ABCA1	ATP2B2	1	0	1
ABCA1	ATP6V0E1	1	0	1
ABCA1	ATXN1	2	1	1
ABCA1	ATXN7L1	2	1	1
ABCA1	B4GALT6	2	1	1
ABCA1	BACH2	2	1	1
ABCA1	BAI3	1	0	1
ABCA1	BARX2	1	1	0
ABCA1	BBX	2	1	1
ABCA1	BCL11B	2	1	1
ABCA1	BCL2L11	2	1	1
ABCA1	BCL6	1	1	0
ABCA1	BHLHE41	2	1	1
ABCA1	BMP6	1	0	1
ABCA1	BNC1	1	0	1
ABCA1	BNC2	2	1	1
ABCA1	BPTF	2	1	1
ABCA1	BRWD1	2	1	1
ABCA1	BRWD3	2	1	1
ABCA1	BTAF1	2	1	1
ABCA1	BTBD10	2	1	1
ABCA1	BTBD7	2	1	1
ABCA1	C10orf12	2	1	1
ABCA1	C11orf82	2	1	1
ABCA1	C16orf70	2	1	1
ABCA1	C1GALT1	2	1	1
ABCA1	C2orf69	2	1	1
ABCA1	C3orf58	2	1	1
ABCA1	C5orf24	2	1	1
ABCA1	C5orf30	1	0	1
ABCA1	C7orf60	2	1	1
ABCA1	CAMSAP2	2	1	1
ABCA1	CAMTA1	2	1	1
ABCA1	CAPRIN2	2	1	1
ABCA1	CASZ1	2	1	1
ABCA1	CBFB	2	1	1
ABCA1	CBLN4	1	0	1
ABCA1	CC2D1A	1	1	0
ABCA1	CCDC85A	2	1	1
ABCA1	CCDC88A	2	1	1
ABCA1	CCND1	1	0	1
ABCA1	CCND2	2	1	1
ABCA1	CCNG2	1	0	1
ABCA1	CCT6A	1	0	1
ABCA1	CDC23	2	1	1
ABCA1	CDC25A	1	0	1
ABCA1	CDK17	2	1	1
ABCA1	CDK19	1	0	1
ABCA1	CDK2	2	1	1
ABCA1	CELF2	2	1	1
ABCA1	CENPO	1	0	1
ABCA1	CEP120	2	1	1
ABCA1	CEP170	2	1	1
ABCA1	CEP55	1	0	1
ABCA1	CERS6	2	1	1
ABCA1	CHD2	2	1	1
ABCA1	CIT	2	1	1
ABCA1	CLDND1	2	1	1
ABCA1	CLIP1	2	1	1
ABCA1	CLIP4	2	1	1
ABCA1	CLOCK	2	1	1
ABCA1	CMPK1	2	1	1
ABCA1	CNEP1R1	2	1	1
ABCA1	CNN1	1	0	1
ABCA1	CNOT4	2	1	1
ABCA1	CNOT6	2	1	1
ABCA1	CNOT7	2	1	1
ABCA1	COL10A1	2	1	1
ABCA1	COL4A1	1	1	0
ABCA1	CPEB1	2	1	1
ABCA1	CPEB2	1	0	1
ABCA1	CPEB4	2	1	1
ABCA1	CPNE2	2	1	1
ABCA1	CPSF6	2	1	1
ABCA1	CREB1	2	1	1
ABCA1	CREB5	2	1	1
ABCA1	CREBRF	2	1	1
ABCA1	CRIM1	2	1	1
ABCA1	CRK	2	1	1
ABCA1	CSF1	2	1	1
ABCA1	CSRP2	2	1	1
ABCA1	CUL3	2	1	1
ABCA1	CXCL12	2	1	1
ABCA1	CYB5R4	2	1	1
ABCA1	DAB2	2	1	1
ABCA1	DAZAP2	2	1	1
ABCA1	DCBLD2	1	0	1
ABCA1	DDX5	2	1	1
ABCA1	DENND4C	2	1	1
ABCA1	DENND5B	1	0	1
ABCA1	DERL2	1	1	0
ABCA1	DIRC2	1	0	1
ABCA1	DLC1	2	1	1
ABCA1	DMRTA2	1	0	1
ABCA1	DMTF1	2	1	1
ABCA1	DNAJB9	2	1	1
ABCA1	DNAJC16	2	1	1
ABCA1	DOCK11	2	1	1
ABCA1	DOCK3	2	1	1
ABCA1	DRD1	2	1	1
ABCA1	DYNC1LI2	2	1	1
ABCA1	DYRK2	2	1	1
ABCA1	E2F1	1	0	1
ABCA1	E2F2	1	0	1
ABCA1	E2F3	2	1	1
ABCA1	E2F5	2	1	1
ABCA1	E2F8	1	0	1
ABCA1	EBF3	2	1	1
ABCA1	ECT2	1	1	0
ABCA1	EDN1	1	0	1
ABCA1	EFNA5	2	1	1
ABCA1	EFNB2	1	1	0
ABCA1	EFR3A	2	1	1
ABCA1	EGR3	2	1	1
ABCA1	EIF2C1	2	1	1
ABCA1	EIF4E3	2	1	1
ABCA1	ELAVL2	1	0	1
ABCA1	ELK3	2	1	1
ABCA1	EOGT	2	1	1
ABCA1	EPAS1	2	1	1
ABCA1	EPS15	2	1	1
ABCA1	ERBB2IP	2	1	1
ABCA1	ERBB3	1	0	1
ABCA1	ERBB4	1	0	1
ABCA1	ERI1	2	1	1
ABCA1	ESR1	1	0	1
ABCA1	ETNK1	2	1	1
ABCA1	EYA4	2	1	1
ABCA1	EZH1	1	0	1
ABCA1	FAM102A	1	0	1
ABCA1	FAM107B	2	1	1
ABCA1	FAM117A	2	1	1
ABCA1	FAM123A	2	1	1
ABCA1	FAM168B	2	1	1
ABCA1	FAM178A	2	1	1
ABCA1	FAM60A	2	1	1
ABCA1	FAT3	2	1	1
ABCA1	FBXO10	2	1	1
ABCA1	FBXO28	2	1	1
ABCA1	FBXW11	2	1	1
ABCA1	FCHO1	2	1	1
ABCA1	FERMT2	2	1	1
ABCA1	FGD4	2	1	1
ABCA1	FIBIN	2	1	1
ABCA1	FIGN	2	1	1
ABCA1	FILIP1L	2	1	1
ABCA1	FN1	2	1	1
ABCA1	FNBP4	2	1	1
ABCA1	FNDC3A	2	1	1
ABCA1	FNDC3B	2	1	1
ABCA1	FOXF1	2	1	1
ABCA1	FOXF2	1	0	1
ABCA1	FOXP1	2	1	1
ABCA1	FRMD4A	2	1	1
ABCA1	FRMD4B	2	1	1
ABCA1	FRMD6	2	1	1
ABCA1	FRS2	2	1	1
ABCA1	FYCO1	2	1	1
ABCA1	G3BP2	2	1	1
ABCA1	GABPB1	2	1	1
ABCA1	GAS1	1	0	1
ABCA1	GDF11	2	1	1
ABCA1	GIT2	2	1	1
ABCA1	GLIS2	2	1	1
ABCA1	GMCL1	2	1	1
ABCA1	GMFB	2	1	1
ABCA1	GNPDA2	2	1	1
ABCA1	GNS	2	1	1
ABCA1	GPC6	2	1	1
ABCA1	GPCPD1	2	1	1
ABCA1	GPM6A	2	1	1
ABCA1	GPR137B	2	1	1
ABCA1	GPR137C	2	1	1
ABCA1	GPR158	2	1	1
ABCA1	GRIN3A	2	1	1
ABCA1	GRM5	2	1	1
ABCA1	GSK3B	2	1	1
ABCA1	GUCY1A3	2	1	1
ABCA1	HBP1	2	1	1
ABCA1	HBS1L	2	1	1
ABCA1	HCFC2	2	1	1
ABCA1	HECTD2	1	0	1
ABCA1	HEG1	2	1	1
ABCA1	HIAT1	2	1	1
ABCA1	HIF1A	2	1	1
ABCA1	HIVEP2	2	1	1
ABCA1	HNRNPH3	2	1	1
ABCA1	HOOK3	2	1	1
ABCA1	HOXD1	1	0	1
ABCA1	HOXD8	2	1	1
ABCA1	HS2ST1	2	1	1
ABCA1	HSPA8	2	1	1
ABCA1	HTR7	2	1	1
ABCA1	IGF1	2	1	1
ABCA1	IGFBP5	2	1	1
ABCA1	IGSF3	2	1	1
ABCA1	IKZF2	2	1	1
ABCA1	IKZF4	2	1	1
ABCA1	IL6ST	2	1	1
ABCA1	INO80	2	1	1
ABCA1	INTS6	2	1	1
ABCA1	IPO7	2	1	1
ABCA1	IPO8	2	1	1
ABCA1	IQGAP2	2	1	1
ABCA1	IQSEC1	2	1	1
ABCA1	IRF1	1	0	1
ABCA1	ITGA11	2	1	1
ABCA1	ITGA4	2	1	1
ABCA1	ITGA6	1	0	1
ABCA1	ITM2C	2	1	1
ABCA1	ITPR1	2	1	1
ABCA1	ITPRIPL2	1	0	1
ABCA1	JAK1	2	1	1
ABCA1	JAZF1	2	1	1
ABCA1	JMY	2	1	1
ABCA1	KANSL1	2	1	1
ABCA1	KAT6A	2	1	1
ABCA1	KBTBD8	2	1	1
ABCA1	KCNE4	1	0	1
ABCA1	KCNIP2	1	1	0
ABCA1	KCNK10	1	1	0
ABCA1	KCNK2	2	1	1
ABCA1	KIAA0240	2	1	1
ABCA1	KIAA0319L	1	0	1
ABCA1	KIAA0947	2	1	1
ABCA1	KIAA1217	2	1	1
ABCA1	KIAA1462	2	1	1
ABCA1	KIAA1468	2	1	1
ABCA1	KIAA2018	2	1	1
ABCA1	KIAA2022	2	1	1
ABCA1	KIF13A	2	1	1
ABCA1	KIF26B	2	1	1
ABCA1	KIT	2	1	1
ABCA1	KLF10	2	1	1
ABCA1	KLF12	2	1	1
ABCA1	KLF3	2	1	1
ABCA1	KLF4	1	0	1
ABCA1	KLHL2	2	1	1
ABCA1	KLHL28	2	1	1
ABCA1	KLHL3	2	1	1
ABCA1	KPNA2	1	0	1
ABCA1	KPNA3	2	1	1
ABCA1	KRAS	2	1	1
ABCA1	L3MBTL3	2	1	1
ABCA1	LAMC1	2	1	1
ABCA1	LAMP5	1	0	1
ABCA1	LARP4B	2	1	1
ABCA1	LBR	2	1	1
ABCA1	LCOR	2	1	1
ABCA1	LCORL	2	1	1
ABCA1	LDLR	1	1	0
ABCA1	LEF1	2	1	1
ABCA1	LHFP	1	0	1
ABCA1	LHX6	1	1	0
ABCA1	LMBR1L	1	0	1
ABCA1	LRCH1	2	1	1
ABCA1	LRIG1	1	0	1
ABCA1	LRP12	2	1	1
ABCA1	LRP4	2	1	1
ABCA1	LRP6	2	1	1
ABCA1	LY75	1	1	0
ABCA1	LYPD6	1	0	1
ABCA1	LYSMD3	2	1	1
ABCA1	MAGI1	2	1	1
ABCA1	MAML1	2	1	1
ABCA1	MAN2A1	2	1	1
ABCA1	MAP1B	2	1	1
ABCA1	MAP3K1	2	1	1
ABCA1	MAP3K14	2	1	1
ABCA1	MAP3K2	2	1	1
ABCA1	MAP3K5	2	1	1
ABCA1	MAP3K7	2	1	1
ABCA1	MAP4K3	2	1	1
ABCA1	MAP4K4	2	1	1
ABCA1	MAPK9	1	1	0
ABCA1	MARCH1	2	1	1
ABCA1	MARCH11	1	1	0
ABCA1	MARCH6	2	1	1
ABCA1	MARCH8	2	1	1
ABCA1	MARK1	1	0	1
ABCA1	MARS	1	1	0
ABCA1	MASTL	2	1	1
ABCA1	MAT2B	2	1	1
ABCA1	MBNL3	2	1	1
ABCA1	MCL1	2	1	1
ABCA1	MECOM	2	1	1
ABCA1	MED12L	1	1	0
ABCA1	MEOX2	1	0	1
ABCA1	MET	1	0	1
ABCA1	MEX3C	2	1	1
ABCA1	MFN2	2	1	1
ABCA1	MGEA5	2	1	1
ABCA1	MIER3	2	1	1
ABCA1	MKL2	2	1	1
ABCA1	MLEC	1	0	1
ABCA1	MLL	2	1	1
ABCA1	MLL5	2	1	1
ABCA1	MLLT10	2	1	1
ABCA1	MTF1	2	1	1
ABCA1	MTMR12	2	1	1
ABCA1	MTMR2	1	0	1
ABCA1	MTMR6	2	1	1
ABCA1	MTMR9	2	1	1
ABCA1	MYBL1	1	0	1
ABCA1	MYO10	1	0	1
ABCA1	MYOCD	2	1	1
ABCA1	MYT1L	2	1	1
ABCA1	NAA16	2	1	1
ABCA1	NABP1	2	1	1
ABCA1	NAP1L3	1	0	1
ABCA1	NAV3	1	0	1
ABCA1	NBEA	2	1	1
ABCA1	NCOA3	2	1	1
ABCA1	NCOA7	2	1	1
ABCA1	NEK9	2	1	1
ABCA1	NFATC3	2	1	1
ABCA1	NFIA	1	0	1
ABCA1	NFIB	2	1	1
ABCA1	NHS	2	1	1
ABCA1	NKX3-2	2	1	1
ABCA1	NOL4	2	1	1
ABCA1	NPAT	2	1	1
ABCA1	NPC1	2	1	1
ABCA1	NPTX1	1	1	0
ABCA1	NR1D2	2	1	1
ABCA1	NR4A2	1	0	1
ABCA1	NR4A3	2	1	1
ABCA1	NR5A2	2	1	1
ABCA1	NRBF2	2	1	1
ABCA1	NRP1	2	1	1
ABCA1	NRP2	2	1	1
ABCA1	NUFIP2	2	1	1
ABCA1	NUMB	2	1	1
ABCA1	NUP205	2	1	1
ABCA1	NUS1	2	1	1
ABCA1	NXPH1	2	1	1
ABCA1	ODZ1	2	1	1
ABCA1	OGDH	2	1	1
ABCA1	OSBPL10	2	1	1
ABCA1	OSTM1	2	1	1
ABCA1	OTUD1	2	1	1
ABCA1	OTUD3	2	1	1
ABCA1	OTUD4	2	1	1
ABCA1	OXR1	2	1	1
ABCA1	PAFAH1B1	2	1	1
ABCA1	PAK7	1	0	1
ABCA1	PALLD	2	1	1
ABCA1	PAN3	2	1	1
ABCA1	PBX3	2	1	1
ABCA1	PCNX	2	1	1
ABCA1	PDE4B	1	1	0
ABCA1	PDE7B	2	1	1
ABCA1	PDGFRA	2	1	1
ABCA1	PDIK1L	2	1	1
ABCA1	PFKP	1	0	1
ABCA1	PFN2	1	0	1
ABCA1	PGBD5	2	1	1
ABCA1	PHAX	2	1	1
ABCA1	PHF6	2	1	1
ABCA1	PIGA	2	1	1
ABCA1	PIK3C2A	2	1	1
ABCA1	PIP4K2A	2	1	1
ABCA1	PJA2	2	1	1
ABCA1	PKD1	1	0	1
ABCA1	PKD2	2	1	1
ABCA1	PKN2	2	1	1
ABCA1	PLAG1	2	1	1
ABCA1	PLCB1	2	1	1
ABCA1	PLCL1	2	1	1
ABCA1	PLEKHA3	2	1	1
ABCA1	PLEKHM1	2	1	1
ABCA1	PODXL	2	1	1
ABCA1	POLQ	2	1	1
ABCA1	POLR3G	1	0	1
ABCA1	PPARGC1B	2	1	1
ABCA1	PPFIA2	2	1	1
ABCA1	PPM1G	1	0	1
ABCA1	PPP1R15B	2	1	1
ABCA1	PPP2R2A	2	1	1
ABCA1	PPP2R3A	1	1	0
ABCA1	PPP6R2	1	1	0
ABCA1	PPP6R3	2	1	1
ABCA1	PRDM10	2	1	1
ABCA1	PRKAA1	2	1	1
ABCA1	PRKACB	2	1	1
ABCA1	PRKD3	2	1	1
ABCA1	PRR5L	2	1	1
ABCA1	PRRG1	2	1	1
ABCA1	PRRX1	2	1	1
ABCA1	PSD3	2	1	1
ABCA1	PSEN1	2	1	1
ABCA1	PTBP3	2	1	1
ABCA1	PTEN	2	1	1
ABCA1	PTK2	2	1	1
ABCA1	PTPDC1	2	1	1
ABCA1	PTPN2	2	1	1
ABCA1	PTPN4	2	1	1
ABCA1	PTPRD	2	1	1
ABCA1	PURB	2	1	1
ABCA1	PWWP2A	2	1	1
ABCA1	PXDN	2	1	1
ABCA1	QSER1	2	1	1
ABCA1	RAB21	2	1	1
ABCA1	RABEP1	2	1	1
ABCA1	RABGAP1	2	1	1
ABCA1	RACGAP1	2	1	1
ABCA1	RAD51B	2	1	1
ABCA1	RAP1B	2	1	1
ABCA1	RAP2C	2	1	1
ABCA1	RAPGEF2	2	1	1
ABCA1	RARB	1	0	1
ABCA1	RASSF2	2	1	1
ABCA1	RB1	2	1	1
ABCA1	RB1CC1	2	1	1
ABCA1	RBL1	2	1	1
ABCA1	RBL2	2	1	1
ABCA1	RBM20	1	1	0
ABCA1	RBM24	1	0	1
ABCA1	RBM25	2	1	1
ABCA1	RBM47	1	0	1
ABCA1	RBMS2	2	1	1
ABCA1	RCOR1	2	1	1
ABCA1	RECK	2	1	1
ABCA1	REEP3	2	1	1
ABCA1	RELL1	1	1	0
ABCA1	RERG	1	0	1
ABCA1	RET	1	0	1
ABCA1	REV3L	2	1	1
ABCA1	RFX7	2	1	1
ABCA1	RGL1	2	1	1
ABCA1	RGMA	1	0	1
ABCA1	RHOT1	2	1	1
ABCA1	RICTOR	2	1	1
ABCA1	RIN2	2	1	1
ABCA1	RLIM	2	1	1
ABCA1	RNF138	1	0	1
ABCA1	RNF145	2	1	1
ABCA1	RNF219	2	1	1
ABCA1	RNF24	2	1	1
ABCA1	RNF38	2	1	1
ABCA1	ROBO1	2	1	1
ABCA1	ROCK2	2	1	1
ABCA1	RORA	2	1	1
ABCA1	RPS6KA5	2	1	1
ABCA1	RPS6KB1	2	1	1
ABCA1	RRAGD	2	1	1
ABCA1	RSBN1L	2	1	1
ABCA1	RSF1	2	1	1
ABCA1	RSRC2	2	1	1
ABCA1	RTN1	2	1	1
ABCA1	RUFY2	2	1	1
ABCA1	RUNX2	2	1	1
ABCA1	RUNX3	2	1	1
ABCA1	RYBP	2	1	1
ABCA1	S1PR1	2	1	1
ABCA1	SAMD12	2	1	1
ABCA1	SAR1B	2	1	1
ABCA1	SATB2	2	1	1
ABCA1	SBF2	1	0	1
ABCA1	SCML2	2	1	1
ABCA1	SCML4	2	1	1
ABCA1	SCN1A	2	1	1
ABCA1	SCN2A	2	1	1
ABCA1	SCN3A	2	1	1
ABCA1	SECISBP2L	2	1	1
ABCA1	SEL1L3	2	1	1
ABCA1	SEMA6D	2	1	1
ABCA1	SEMA7A	2	1	1
ABCA1	SEPHS1	1	0	1
ABCA1	SERINC3	2	1	1
ABCA1	SERTAD2	2	1	1
ABCA1	SETD7	2	1	1
ABCA1	SFRP2	1	0	1
ABCA1	SGCD	2	1	1
ABCA1	SGMS1	1	0	1
ABCA1	SGTB	2	1	1
ABCA1	SIK1	2	1	1
ABCA1	SIM1	1	0	1
ABCA1	SIRPA	2	1	1
ABCA1	SKI	2	1	1
ABCA1	SKIDA1	2	1	1
ABCA1	SLAIN1	1	0	1
ABCA1	SLC16A6	1	0	1
ABCA1	SLC24A2	2	1	1
ABCA1	SLC25A36	2	1	1
ABCA1	SLC33A1	2	1	1
ABCA1	SLC35F5	2	1	1
ABCA1	SLC38A2	2	1	1
ABCA1	SLC39A10	2	1	1
ABCA1	SLC39A6	1	0	1
ABCA1	SLC4A4	2	1	1
ABCA1	SLC6A6	2	1	1
ABCA1	SLITRK4	1	0	1
ABCA1	SLK	2	1	1
ABCA1	SLMAP	2	1	1
ABCA1	SMAD1	2	1	1
ABCA1	SMAD4	2	1	1
ABCA1	SMAD5	2	1	1
ABCA1	SMARCAD1	2	1	1
ABCA1	SMEK2	1	1	0
ABCA1	SMOC2	1	0	1
ABCA1	SNIP1	2	1	1
ABCA1	SNTB2	2	1	1
ABCA1	SNX2	2	1	1
ABCA1	SOCS5	2	1	1
ABCA1	SOCS6	2	1	1
ABCA1	SOX11	1	0	1
ABCA1	SOX6	2	1	1
ABCA1	SP1	2	1	1
ABCA1	SP2	2	1	1
ABCA1	SPIRE1	2	1	1
ABCA1	SPOPL	2	1	1
ABCA1	SPRED1	2	1	1
ABCA1	SPTY2D1	2	1	1
ABCA1	SRGAP1	2	1	1
ABCA1	SRPX	2	1	1
ABCA1	SRSF12	1	0	1
ABCA1	ST18	2	1	1
ABCA1	ST6GALNAC3	2	1	1
ABCA1	STAG1	2	1	1
ABCA1	STX12	2	1	1
ABCA1	STX7	2	1	1
ABCA1	STYX	2	1	1
ABCA1	SULF1	2	1	1
ABCA1	SUN1	2	1	1
ABCA1	SUV420H1	2	1	1
ABCA1	SUZ12	2	1	1
ABCA1	SYDE1	2	1	1
ABCA1	SYNCRIP	2	1	1
ABCA1	TAB3	2	1	1
ABCA1	TAGAP	2	1	1
ABCA1	TAL1	2	1	1
ABCA1	TANC1	1	0	1
ABCA1	TANC2	2	1	1
ABCA1	TARDBP	2	1	1
ABCA1	TBC1D15	2	1	1
ABCA1	TBC1D20	1	0	1
ABCA1	TBC1D8	1	0	1
ABCA1	TBL1X	1	1	0
ABCA1	TBL1XR1	2	1	1
ABCA1	TCF4	2	1	1
ABCA1	TCF7L2	2	1	1
ABCA1	TEAD1	2	1	1
ABCA1	TES	1	0	1
ABCA1	TET2	2	1	1
ABCA1	TET3	2	1	1
ABCA1	TEX2	1	0	1
ABCA1	TGFB2	2	1	1
ABCA1	TGFBR1	2	1	1
ABCA1	TGFBR2	2	1	1
ABCA1	TGFBR3	2	1	1
ABCA1	TIAM1	2	1	1
ABCA1	TIMP2	2	1	1
ABCA1	TIMP3	1	0	1
ABCA1	TMCC1	2	1	1
ABCA1	TMEM123	2	1	1
ABCA1	TMEM170B	2	1	1
ABCA1	TMEM236	2	1	1
ABCA1	TMEM25	1	0	1
ABCA1	TNFRSF21	2	1	1
ABCA1	TNKS2	2	1	1
ABCA1	TNRC6A	2	1	1
ABCA1	TNRC6C	1	0	1
ABCA1	TP63	1	0	1
ABCA1	TRAM1	2	1	1
ABCA1	TRIM2	1	0	1
ABCA1	TRIM37	2	1	1
ABCA1	TRIM44	2	1	1
ABCA1	TRIP11	2	1	1
ABCA1	TRPS1	1	1	0
ABCA1	TSC22D2	2	1	1
ABCA1	TSHZ2	2	1	1
ABCA1	TTC28	2	1	1
ABCA1	TTC9	2	1	1
ABCA1	TWF1	1	0	1
ABCA1	UBE2D1	2	1	1
ABCA1	UBE2D3	2	1	1
ABCA1	UBE2W	2	1	1
ABCA1	UBR1	2	1	1
ABCA1	ULK2	2	1	1
ABCA1	UNKL	2	1	1
ABCA1	USP25	2	1	1
ABCA1	USP32	2	1	1
ABCA1	USP34	2	1	1
ABCA1	USP46	2	1	1
ABCA1	USP53	2	1	1
ABCA1	USP6NL	1	0	1
ABCA1	USP9X	2	1	1
ABCA1	VEZF1	2	1	1
ABCA1	VPS26A	2	1	1
ABCA1	WDFY3	2	1	1
ABCA1	WDR20	2	1	1
ABCA1	WDR47	2	1	1
ABCA1	WDR7	2	1	1
ABCA1	WEE1	2	1	1
ABCA1	WNK1	2	1	1
ABCA1	WNK3	2	1	1
ABCA1	WNT1	1	1	0
ABCA1	XPO5	1	0	1
ABCA1	XRN2	2	1	1
ABCA1	YPEL2	2	1	1
ABCA1	YTHDF3	2	1	1
ABCA1	ZBTB41	1	0	1
ABCA1	ZBTB44	1	1	0
ABCA1	ZBTB5	2	1	1
ABCA1	ZBTB6	2	1	1
ABCA1	ZC3H12C	2	1	1
ABCA1	ZCCHC14	2	1	1
ABCA1	ZCCHC24	2	1	1
ABCA1	ZDHHC2	2	1	1
ABCA1	ZDHHC9	2	1	1
ABCA1	ZEB1	2	1	1
ABCA1	ZFHX4	2	1	1
ABCA1	ZFP91	2	1	1
ABCA1	ZFPM2	2	1	1
ABCA1	ZFYVE26	2	1	1
ABCA1	ZHX1	2	1	1
ABCA1	ZNF148	2	1	1
ABCA1	ZNF217	2	1	1
ABCA1	ZNF236	2	1	1
ABCA1	ZNF292	2	1	1
ABCA1	ZNF326	1	1	0
ABCA1	ZNF503	2	1	1
ABCA1	ZNF532	2	1	1
ABCA1	ZNF652	1	0	1
ABCA1	ZNF697	2	1	1
ABCA1	ZNF704	2	1	1
ABCA1	ZNF800	2	1	1
ABCA1	ZNFX1	2	1	1
ABCA12	RBMS1	1	0	1
ABCA12	SOCS5	1	1	0
ABCA12	WWP1	1	0	1
ABCA2	DIAPH1	1	0	1
ABCA2	ZNF318	2	1	1
ABCB10	NEK7	2	1	1
ABCB10	SGMS1	2	1	1
ABCB5	ACVR1C	2	1	1
ABCB5	BMP3	1	1	0
ABCB5	C8orf4	2	1	1
ABCB5	CLMP	2	1	1
ABCB5	DKK1	2	1	1
ABCB5	EDN1	1	1	0
ABCB5	F3	1	0	1
ABCB5	FAM81A	2	1	1
ABCB5	FOXD1	1	0	1
ABCB5	HEG1	1	0	1
ABCB5	HOXA3	1	1	0
ABCB5	KIAA1462	1	0	1
ABCB5	MAML1	1	0	1
ABCB5	MOB3B	2	1	1
ABCB5	NPTX1	2	1	1
ABCB5	PLCL2	2	1	1
ABCB5	S1PR2	1	0	1
ABCB5	SCN9A	2	1	1
ABCB5	SIM1	1	1	0
ABCB5	SRPX	1	0	1
ABCB5	TIMP2	1	1	0
ABCB5	TMOD1	1	1	0
ABCB6	NID1	1	0	1
ABCB6	ZNF346	2	1	1
ABCB7	CAP1	1	0	1
ABCB7	CLCN3	2	1	1
ABCB7	DHX15	2	1	1
ABCB7	ETNK1	2	1	1
ABCB7	IPO8	2	1	1
ABCB7	PHAX	2	1	1
ABCB7	PIK3C2A	2	1	1
ABCB7	SNX2	2	1	1
ABCB7	STX12	2	1	1
ABCC10	ANKRA2	2	1	1
ABCC10	ARHGAP20	1	0	1
ABCC10	ARID3B	2	1	1
ABCC10	ATAD2B	2	1	1
ABCC10	AURKB	1	0	1
ABCC10	BEND6	1	0	1
ABCC10	BTBD9	1	1	0
ABCC10	BTF3L4	2	1	1
ABCC10	C11orf84	2	1	1
ABCC10	C15orf29	1	1	0
ABCC10	C20orf194	1	0	1
ABCC10	C6orf211	2	1	1
ABCC10	CEP135	1	0	1
ABCC10	CHD4	1	0	1
ABCC10	CHRD	2	1	1
ABCC10	CNOT2	1	1	0
ABCC10	COL14A1	1	0	1
ABCC10	COL4A6	1	0	1
ABCC10	DCAF15	1	1	0
ABCC10	DDN	1	0	1
ABCC10	DDX19A	2	1	1
ABCC10	DICER1	2	1	1
ABCC10	DOT1L	1	1	0
ABCC10	EEA1	1	1	0
ABCC10	EIF2C3	2	1	1
ABCC10	EIF4G2	1	1	0
ABCC10	ERGIC1	1	0	1
ABCC10	FAF1	2	1	1
ABCC10	FAM135A	2	1	1
ABCC10	FBXL19	1	0	1
ABCC10	FBXO30	2	1	1
ABCC10	FGD6	1	1	0
ABCC10	FNDC3A	2	1	1
ABCC10	FNTB	1	0	1
ABCC10	GABBR2	1	0	1
ABCC10	GALC	2	1	1
ABCC10	GGA3	2	1	1
ABCC10	GJC1	1	1	0
ABCC10	GOPC	1	1	0
ABCC10	GTF2I	2	1	1
ABCC10	HMGA1	1	0	1
ABCC10	INTS2	1	1	0
ABCC10	ITGB8	2	1	1
ABCC10	KCTD21	1	0	1
ABCC10	KIAA1033	1	1	0
ABCC10	KIAA1274	1	1	0
ABCC10	LRIG1	2	1	1
ABCC10	LRIG2	1	1	0
ABCC10	MAP4K4	1	0	1
ABCC10	MDFI	2	1	1
ABCC10	MEX3A	2	1	1
ABCC10	MFAP3L	1	0	1
ABCC10	MIB1	2	1	1
ABCC10	MLLT10	2	1	1
ABCC10	MTUS1	1	0	1
ABCC10	MYO1F	2	1	1
ABCC10	NCK2	2	1	1
ABCC10	NEK9	2	1	1
ABCC10	NNT	2	1	1
ABCC10	NPHP3	2	1	1
ABCC10	PARM1	1	1	0
ABCC10	PARP8	2	1	1
ABCC10	PBX2	2	1	1
ABCC10	PCGF3	1	0	1
ABCC10	PHACTR2	1	1	0
ABCC10	PRPF38B	1	0	1
ABCC10	PRRX1	1	0	1
ABCC10	PTAFR	1	1	0
ABCC10	RB1	1	0	1
ABCC10	RGS16	1	1	0
ABCC10	RNF170	1	1	0
ABCC10	RNF20	1	1	0
ABCC10	RUFY3	2	1	1
ABCC10	RUNX1T1	2	1	1
ABCC10	S100A8	2	1	1
ABCC10	SAP30L	1	0	1
ABCC10	SBNO1	1	0	1
ABCC10	SEMA4C	2	1	1
ABCC10	SLC29A3	1	1	0
ABCC10	SREK1	1	0	1
ABCC10	SREK1IP1	1	0	1
ABCC10	STXBP5	1	1	0
ABCC10	TEAD3	2	1	1
ABCC10	TET2	2	1	1
ABCC10	THOC2	1	1	0
ABCC10	TIA1	2	1	1
ABCC10	TMEM65	2	1	1
ABCC10	YPEL2	1	0	1
ABCC10	ZBTB39	1	1	0
ABCC10	ZFYVE16	1	0	1
ABCC10	ZNF318	2	1	1
ABCC10	ZNF512B	1	1	0
ABCC10	ZNF689	2	1	1
ABCC10	ZNF710	1	1	0
ABCC10	ZSWIM4	1	1	0
ABCC12	CXCL5	1	1	0
ABCC4	CBFB	2	1	1
ABCC4	CEP112	2	1	1
ABCC4	CNN3	1	1	0
ABCC4	FAM65B	2	1	1
ABCC4	HOXA13	2	1	1
ABCC4	LIPA	2	1	1
ABCC4	MARK1	1	1	0
ABCC4	NPL	1	1	0
ABCC4	NR5A2	2	1	1
ABCC4	PRKD1	2	1	1
ABCC4	RGPD3	1	0	1
ABCC4	RPIA	2	1	1
ABCC4	SMAD9	2	1	1
ABCC4	STAC	2	1	1
ABCC4	TFPI	2	1	1
ABCC4	WIPF2	1	1	0
ABCC5	ABL2	1	0	1
ABCC5	ACSL4	2	1	1
ABCC5	ACTL6A	2	1	1
ABCC5	AMMECR1L	2	1	1
ABCC5	ANKRA2	2	1	1
ABCC5	ANKRD50	2	1	1
ABCC5	ANKRD52	2	1	1
ABCC5	ARL5A	1	1	0
ABCC5	ASAP1	2	1	1
ABCC5	ATAD2B	2	1	1
ABCC5	ATP13A3	2	1	1
ABCC5	BCL2L1	2	1	1
ABCC5	BCL7A	2	1	1
ABCC5	BRWD1	2	1	1
ABCC5	BRWD3	2	1	1
ABCC5	C20orf20	1	0	1
ABCC5	CAPRIN2	2	1	1
ABCC5	CCDC85A	1	0	1
ABCC5	CDYL	2	1	1
ABCC5	CELF1	2	1	1
ABCC5	CEP120	2	1	1
ABCC5	CHRD	1	0	1
ABCC5	CHSY3	2	1	1
ABCC5	CNOT4	2	1	1
ABCC5	CNOT6L	2	1	1
ABCC5	COL14A1	1	0	1
ABCC5	COL1A1	1	0	1
ABCC5	COL1A2	1	0	1
ABCC5	COL3A1	1	0	1
ABCC5	CPEB2	2	1	1
ABCC5	CPEB3	2	1	1
ABCC5	CPEB4	2	1	1
ABCC5	CPED1	1	0	1
ABCC5	DAPK1	2	1	1
ABCC5	DICER1	2	1	1
ABCC5	DLC1	2	1	1
ABCC5	DMD	2	1	1
ABCC5	DNAL1	1	0	1
ABCC5	DR1	2	1	1
ABCC5	DUSP7	2	1	1
ABCC5	DVL3	2	1	1
ABCC5	E2F5	2	1	1
ABCC5	ERCC4	2	1	1
ABCC5	ERGIC1	2	1	1
ABCC5	ERLIN1	2	1	1
ABCC5	ETNK1	2	1	1
ABCC5	FAM178A	2	1	1
ABCC5	FAM49B	2	1	1
ABCC5	FNDC3B	1	1	0
ABCC5	FNIP1	2	1	1
ABCC5	FOXP1	2	1	1
ABCC5	GCNT4	1	1	0
ABCC5	GOLT1B	2	1	1
ABCC5	GOPC	1	1	0
ABCC5	HAND2	2	1	1
ABCC5	HAS2	2	1	1
ABCC5	HCFC2	2	1	1
ABCC5	HOXA1	2	1	1
ABCC5	IGF1	2	1	1
ABCC5	IPO11	2	1	1
ABCC5	ITGB8	1	0	1
ABCC5	ITSN1	1	0	1
ABCC5	KCNQ4	1	0	1
ABCC5	LCOR	2	1	1
ABCC5	LEPROTL1	2	1	1
ABCC5	LMLN	2	1	1
ABCC5	LOXL4	2	1	1
ABCC5	LRIG1	2	1	1
ABCC5	LRIG2	2	1	1
ABCC5	MAP3K1	2	1	1
ABCC5	MKL2	2	1	1
ABCC5	MLL2	1	1	0
ABCC5	MOB4	2	1	1
ABCC5	MPPED2	1	0	1
ABCC5	MTF2	1	0	1
ABCC5	MTMR12	2	1	1
ABCC5	NAA30	2	1	1
ABCC5	NAA50	2	1	1
ABCC5	NCOA1	2	1	1
ABCC5	NXPH1	1	1	0
ABCC5	PAX6	2	1	1
ABCC5	PCDH19	2	1	1
ABCC5	PCGF3	2	1	1
ABCC5	PLCB1	2	1	1
ABCC5	POGZ	2	1	1
ABCC5	POU2F1	1	1	0
ABCC5	PRTG	1	0	1
ABCC5	PTP4A2	2	1	1
ABCC5	RAI2	1	0	1
ABCC5	RASA1	2	1	1
ABCC5	RNF38	1	0	1
ABCC5	ROCK1	2	1	1
ABCC5	RUFY2	2	1	1
ABCC5	SECISBP2L	2	1	1
ABCC5	SEMA4C	2	1	1
ABCC5	SEMA4F	2	1	1
ABCC5	SENP2	2	1	1
ABCC5	SLC16A10	1	0	1
ABCC5	SLC29A3	1	1	0
ABCC5	SLC38A2	2	1	1
ABCC5	SLC38A9	1	1	0
ABCC5	SLC4A7	2	1	1
ABCC5	SOCS4	2	1	1
ABCC5	SOGA2	1	0	1
ABCC5	SOX4	2	1	1
ABCC5	SPIRE1	2	1	1
ABCC5	SPOPL	2	1	1
ABCC5	STARD3NL	2	1	1
ABCC5	STRAP	1	0	1
ABCC5	SYBU	1	0	1
ABCC5	TARBP2	1	1	0
ABCC5	TBC1D9	2	1	1
ABCC5	THBS1	2	1	1
ABCC5	TMEM41A	2	1	1
ABCC5	TMEM65	1	0	1
ABCC5	TMEM91	2	1	1
ABCC5	TNPO1	2	1	1
ABCC5	TP53	1	0	1
ABCC5	TRAK2	2	1	1
ABCC5	TSC1	2	1	1
ABCC5	UBAP2L	2	1	1
ABCC5	UHRF2	2	1	1
ABCC5	USP24	2	1	1
ABCC5	USP38	2	1	1
ABCC5	USP46	1	1	0
ABCC5	VCPIP1	2	1	1
ABCC5	XYLT1	1	0	1
ABCC5	YTHDF3	2	1	1
ABCC5	ZBTB10	1	0	1
ABCC5	ZCCHC24	1	0	1
ABCC5	ZCCHC8	2	1	1
ABCC5	ZFYVE16	2	1	1
ABCC5	ZIC5	1	0	1
ABCC5	ZNF516	1	0	1
ABCC5	ZNF641	1	1	0
ABCC5	ZNF644	1	1	0
ABCC5	ZNF689	2	1	1
ABCC9	SCN9A	2	1	1
ABCD3	APC	2	1	1
ABCD3	ARHGAP12	1	0	1
ABCD3	CAND1	2	1	1
ABCD3	CS	2	1	1
ABCD3	DCP2	2	1	1
ABCD3	DENND4C	2	1	1
ABCD3	ELK3	2	1	1
ABCD3	HOMER1	2	1	1
ABCD3	KIF3A	1	1	0
ABCD3	LARS	2	1	1
ABCD3	MLLT6	1	1	0
ABCD3	OPA1	2	1	1
ABCD3	SEC22A	1	1	0
ABCD3	SLC30A5	2	1	1
ABCD3	UBR1	2	1	1
ABCD3	ZNF238	2	1	1
ABCE1	ACTR3	2	1	1
ABCE1	AMMECR1	2	1	1
ABCE1	C17orf39	1	0	1
ABCE1	CAND1	2	1	1
ABCE1	CCNA2	2	1	1
ABCE1	CREBBP	2	1	1
ABCE1	CSRNP2	2	1	1
ABCE1	DAG1	2	1	1
ABCE1	DCUN1D4	2	1	1
ABCE1	DENND4C	2	1	1
ABCE1	DOPEY1	2	1	1
ABCE1	FAM136A	1	1	0
ABCE1	FBXO28	1	1	0
ABCE1	FEM1B	2	1	1
ABCE1	GSK3B	2	1	1
ABCE1	HDAC4	1	0	1
ABCE1	HEATR5A	2	1	1
ABCE1	HMGCR	1	1	0
ABCE1	HOMER1	2	1	1
ABCE1	IL1RAP	2	1	1
ABCE1	ITGA6	2	1	1
ABCE1	JOSD1	1	0	1
ABCE1	KCTD20	2	1	1
ABCE1	KIAA0947	2	1	1
ABCE1	KIF11	2	1	1
ABCE1	KIF21A	1	1	0
ABCE1	LARP4B	2	1	1
ABCE1	LIN54	2	1	1
ABCE1	MAPKBP1	1	0	1
ABCE1	MARCH1	1	1	0
ABCE1	METAP2	2	1	1
ABCE1	MIER3	2	1	1
ABCE1	MORF4L1	2	1	1
ABCE1	NCOA4	1	1	0
ABCE1	NKRF	2	1	1
ABCE1	NOLC1	2	1	1
ABCE1	NUCKS1	2	1	1
ABCE1	NUDT11	1	0	1
ABCE1	NUFIP2	2	1	1
ABCE1	OTUD4	2	1	1
ABCE1	PDHX	1	1	0
ABCE1	PDS5B	2	1	1
ABCE1	PPM1B	2	1	1
ABCE1	PTBP3	2	1	1
ABCE1	PTPN1	1	0	1
ABCE1	RAP1GDS1	2	1	1
ABCE1	RAPGEF6	2	1	1
ABCE1	RCOR1	2	1	1
ABCE1	REV3L	2	1	1
ABCE1	RICTOR	2	1	1
ABCE1	RNF138	2	1	1
ABCE1	SCAI	2	1	1
ABCE1	SETDB2	2	1	1
ABCE1	SLK	2	1	1
ABCE1	SMEK2	2	1	1
ABCE1	SNRK	2	1	1
ABCE1	SPAST	2	1	1
ABCE1	SRSF11	2	1	1
ABCE1	TATDN2	1	0	1
ABCE1	TET3	2	1	1
ABCE1	TMTC3	2	1	1
ABCE1	TNRC6A	2	1	1
ABCE1	UBTD2	2	1	1
ABCE1	UBTF	2	1	1
ABCE1	YTHDF3	2	1	1
ABCE1	ZBTB1	2	1	1
ABCE1	ZBTB10	2	1	1
ABCE1	ZMIZ1	1	0	1
ABCE1	ZNF718	2	1	1
ABCF2	AQP11	1	0	1
ABCF2	ARMC1	2	1	1
ABCF2	ATXN2	1	1	0
ABCF2	AXIN2	1	0	1
ABCF2	BAG4	2	1	1
ABCF2	CDC37L1	2	1	1
ABCF2	CDK5R1	1	0	1
ABCF2	EPHA1	2	1	1
ABCF2	GPN1	2	1	1
ABCF2	GPR63	1	0	1
ABCF2	HDGF	2	1	1
ABCF2	HIATL1	2	1	1
ABCF2	KLHL18	1	1	0
ABCF2	LENG8	2	1	1
ABCF2	LMAN2L	1	0	1
ABCF2	NBR1	2	1	1
ABCF2	PAPD4	2	1	1
ABCF2	PAQR3	1	1	0
ABCF2	PDAP1	2	1	1
ABCF2	PDCD11	2	1	1
ABCF2	PDIK1L	2	1	1
ABCF2	PI4KB	1	1	0
ABCF2	PLEKHA1	2	1	1
ABCF2	PPP1R14C	1	0	1
ABCF2	SLITRK6	2	1	1
ABCF2	SOCS5	1	1	0
ABCF2	SOS1	2	1	1
ABCF2	SYNRG	1	1	0
ABCF2	TBC1D19	1	0	1
ABCF2	VTI1A	2	1	1
ABCF2	WWP1	1	0	1
ABCF2	ZNF326	1	1	0
ABCF2	ZNF622	1	1	0
ABCF3	AHNAK2	1	0	1
ABCF3	AP2A1	1	0	1
ABCF3	ATXN7L3	2	1	1
ABCF3	BSDC1	1	0	1
ABCF3	C17orf59	2	1	1
ABCF3	C19orf6	1	0	1
ABCF3	C1QL4	1	0	1
ABCF3	CCND1	1	0	1
ABCF3	CHD6	1	0	1
ABCF3	EGLN2	1	0	1
ABCF3	EIF2B5	2	1	1
ABCF3	IRF2BPL	2	1	1
ABCF3	LRRC57	2	1	1
ABCF3	MARCH9	2	1	1
ABCF3	MNT	1	1	0
ABCF3	NFE2L1	2	1	1
ABCF3	PDAP1	1	1	0
ABCF3	PEX5	2	1	1
ABCF3	PIK3IP1	1	0	1
ABCF3	PNPLA6	1	1	0
ABCF3	PPP1R14C	1	0	1
ABCF3	PUF60	2	1	1
ABCF3	RANBP3	2	1	1
ABCF3	RIC8A	2	1	1
ABCF3	SMYD5	1	1	0
ABCF3	SPEN	1	1	0
ABCF3	SPRYD3	1	0	1
ABCF3	TMEM55B	1	0	1
ABCF3	USP19	2	1	1
ABCF3	WDTC1	1	0	1
ABCG1	WDR19	1	0	1
ABCG2	ACBD5	2	1	1
ABCG2	ARHGEF18	1	1	0
ABCG2	B3GALT2	1	1	0
ABCG2	BAGE	1	1	0
ABCG2	BAMBI	1	1	0
ABCG2	BNC2	2	1	1
ABCG2	CC2D1A	1	1	0
ABCG2	CD69	1	1	0
ABCG2	CHRM2	1	1	0
ABCG2	CLIP4	1	1	0
ABCG2	CTSA	1	1	0
ABCG2	DPF3	1	1	0
ABCG2	ERO1LB	1	1	0
ABCG2	FASTK	1	1	0
ABCG2	FGF4	1	1	0
ABCG2	GRAMD1A	1	1	0
ABCG2	GRHL2	1	1	0
ABCG2	GUCY1A3	1	1	0
ABCG2	HSPA8	1	1	0
ABCG2	IGF2BP1	1	1	0
ABCG2	ISM2	1	1	0
ABCG2	ITFG1	2	1	1
ABCG2	KLHL2	2	1	1
ABCG2	LIMK1	1	1	0
ABCG2	LRP4	2	1	1
ABCG2	MAP3K8	1	1	0
ABCG2	MARCH11	1	1	0
ABCG2	MARS	1	1	0
ABCG2	MXI1	1	1	0
ABCG2	NAA16	1	1	0
ABCG2	NAGK	1	1	0
ABCG2	NPAS2	1	1	0
ABCG2	NRSN1	1	1	0
ABCG2	OXR1	1	1	0
ABCG2	PFKP	1	0	1
ABCG2	PKD2	1	1	0
ABCG2	PRDM14	1	1	0
ABCG2	RASL11B	2	1	1
ABCG2	RGL1	1	1	0
ABCG2	RGMA	2	1	1
ABCG2	SLC2A4	1	1	0
ABCG2	SLC35F5	1	0	1
ABCG2	TBC1D9	2	1	1
ABCG2	TBL1X	1	1	0
ABCG2	TMEM100	1	1	0
ABCG2	TMEM133	1	1	0
ABCG2	TRIP10	1	1	0
ABCG2	USP31	1	1	0
ABCG2	USP34	1	1	0
ABCG2	USP53	1	1	0
ABCG2	YPEL4	1	1	0
ABCG2	ZBTB33	1	1	0
ABCG2	ZDHHC9	1	1	0
ABCG2	ZNF202	1	1	0
ABCG4	AFF1	1	0	1
ABCG4	ANKRA2	1	0	1
ABCG4	ARHGAP1	1	0	1
ABCG4	ATXN1	1	0	1
ABCG4	BNC2	2	1	1
ABCG4	BTG2	1	0	1
ABCG4	CALD1	2	1	1
ABCG4	CDC25A	1	0	1
ABCG4	CDCA7	1	0	1
ABCG4	CPNE2	2	1	1
ABCG4	CRY2	1	0	1
ABCG4	DDX26B	2	1	1
ABCG4	DNAJC16	1	0	1
ABCG4	E2F3	1	0	1
ABCG4	ESR1	1	0	1
ABCG4	EYA4	1	0	1
ABCG4	FAM102A	1	0	1
ABCG4	FAM13C	1	0	1
ABCG4	FAM46C	1	0	1
ABCG4	FIBIN	2	1	1
ABCG4	FOXA1	1	0	1
ABCG4	FSTL1	1	0	1
ABCG4	GABBR2	1	0	1
ABCG4	GDF11	1	0	1
ABCG4	GIT2	1	0	1
ABCG4	GLIS3	1	0	1
ABCG4	GOLGA1	1	0	1
ABCG4	GPC6	1	0	1
ABCG4	HAS2	2	1	1
ABCG4	HEG1	1	0	1
ABCG4	HOXC8	2	1	1
ABCG4	ITGA11	1	0	1
ABCG4	ITGA6	1	0	1
ABCG4	LAMP5	1	0	1
ABCG4	LATS2	1	0	1
ABCG4	LHFP	1	0	1
ABCG4	LIMA1	1	0	1
ABCG4	LRP4	2	1	1
ABCG4	MAPK4	1	0	1
ABCG4	MID1	1	0	1
ABCG4	MIDN	1	0	1
ABCG4	NEK9	1	0	1
ABCG4	NFIB	1	0	1
ABCG4	OTX1	1	0	1
ABCG4	PDGFRA	1	0	1
ABCG4	PGBD5	1	0	1
ABCG4	POLR3G	1	0	1
ABCG4	PRDM13	1	0	1
ABCG4	PRDM6	2	1	1
ABCG4	PRR15	1	0	1
ABCG4	PTPN21	2	1	1
ABCG4	RAB5B	1	0	1
ABCG4	RABEP1	1	0	1
ABCG4	RECK	1	1	0
ABCG4	REEP5	1	0	1
ABCG4	RGMA	1	0	1
ABCG4	RGMB	1	0	1
ABCG4	RRAGD	1	0	1
ABCG4	SAR1B	1	0	1
ABCG4	SEMA4B	1	0	1
ABCG4	SKI	2	1	1
ABCG4	SLC16A6	1	0	1
ABCG4	SLC24A2	1	0	1
ABCG4	SLC39A6	1	0	1
ABCG4	SLC40A1	1	0	1
ABCG4	SNRK	1	0	1
ABCG4	SOBP	2	1	1
ABCG4	SPOPL	1	0	1
ABCG4	SPRY4	1	0	1
ABCG4	STK38	1	0	1
ABCG4	SYDE1	2	1	1
ABCG4	SYTL4	1	0	1
ABCG4	TBC1D9	1	0	1
ABCG4	TCF7L1	1	0	1
ABCG4	TGFB1I1	2	1	1
ABCG4	TMEM25	1	0	1
ABCG4	TRIM3	1	0	1
ABCG4	TRIM8	1	0	1
ABCG4	TSG101	1	0	1
ABCG4	ZFPM2	2	1	1
ABCG4	ZNF532	2	1	1
ABHD13	ACAP2	2	1	1
ABHD13	ACTR2	2	1	1
ABHD13	ACTR3	2	1	1
ABHD13	ADAM10	2	1	1
ABHD13	AFF4	2	1	1
ABHD13	AGGF1	2	1	1
ABHD13	AHCYL1	1	1	0
ABHD13	ANKIB1	2	1	1
ABHD13	ANKRD13C	2	1	1
ABHD13	ANKRD28	2	1	1
ABHD13	ANKRD44	2	1	1
ABHD13	ARID5B	2	1	1
ABHD13	ARMC1	2	1	1
ABHD13	ASPN	2	1	1
ABHD13	ATP2A2	2	1	1
ABHD13	ATP8A1	2	1	1
ABHD13	ATP8B1	2	1	1
ABHD13	AZIN1	2	1	1
ABHD13	BAI3	2	1	1
ABHD13	BCL11A	1	0	1
ABHD13	BRMS1L	2	1	1
ABHD13	C16orf87	1	0	1
ABHD13	C21orf91	2	1	1
ABHD13	C5orf43	2	1	1
ABHD13	C6orf62	2	1	1
ABHD13	CADM2	1	0	1
ABHD13	CAND1	2	1	1
ABHD13	CCND2	2	1	1
ABHD13	CDC42	2	1	1
ABHD13	CDK13	2	1	1
ABHD13	CEP350	2	1	1
ABHD13	CHCHD10	1	1	0
ABHD13	CHMP7	2	1	1
ABHD13	CHSY3	2	1	1
ABHD13	CLDN11	2	1	1
ABHD13	CNKSR2	2	1	1
ABHD13	CPEB1	2	1	1
ABHD13	CPEB3	2	1	1
ABHD13	DCP1A	2	1	1
ABHD13	DDX3X	2	1	1
ABHD13	DMXL1	2	1	1
ABHD13	E2F3	2	1	1
ABHD13	EEA1	2	1	1
ABHD13	ELAVL2	2	1	1
ABHD13	ESRRG	2	1	1
ABHD13	FAM126B	2	1	1
ABHD13	FAM133B	2	1	1
ABHD13	FBXL17	2	1	1
ABHD13	FNBP4	2	1	1
ABHD13	FNIP1	2	1	1
ABHD13	FOXN3	2	1	1
ABHD13	FRS2	2	1	1
ABHD13	FRYL	2	1	1
ABHD13	GNPDA2	2	1	1
ABHD13	GPM6B	2	1	1
ABHD13	GPR137C	1	1	0
ABHD13	GPR158	1	0	1
ABHD13	GSPT1	1	0	1
ABHD13	HERC3	2	1	1
ABHD13	HIPK1	2	1	1
ABHD13	HLTF	1	1	0
ABHD13	HNRNPK	2	1	1
ABHD13	IBTK	1	1	0
ABHD13	IGF2BP3	2	1	1
ABHD13	ITPR1	2	1	1
ABHD13	JAZF1	2	1	1
ABHD13	JMY	2	1	1
ABHD13	KAT6B	2	1	1
ABHD13	KCNA1	2	1	1
ABHD13	KIAA1109	2	1	1
ABHD13	KLF5	2	1	1
ABHD13	LCOR	2	1	1
ABHD13	LHFPL2	2	1	1
ABHD13	LRP12	2	1	1
ABHD13	LRRC1	2	1	1
ABHD13	LRRC4	1	1	0
ABHD13	LUZP1	2	1	1
ABHD13	LUZP6	2	1	1
ABHD13	MAB21L1	1	0	1
ABHD13	MAGEL2	2	1	1
ABHD13	MAP3K3	1	0	1
ABHD13	MAST4	2	1	1
ABHD13	MBTD1	2	1	1
ABHD13	MED1	2	1	1
ABHD13	MEF2A	2	1	1
ABHD13	MET	2	1	1
ABHD13	MLL5	2	1	1
ABHD13	MMP16	2	1	1
ABHD13	MTDH	2	1	1
ABHD13	MTMR12	2	1	1
ABHD13	MYO16	1	1	0
ABHD13	NCOA1	2	1	1
ABHD13	NEGR1	2	1	1
ABHD13	NOVA1	1	0	1
ABHD13	NPC1	2	1	1
ABHD13	NR3C1	2	1	1
ABHD13	NR4A3	2	1	1
ABHD13	NUFIP2	2	1	1
ABHD13	OTUD4	2	1	1
ABHD13	OXSR1	2	1	1
ABHD13	PAIP1	1	0	1
ABHD13	PAPD5	2	1	1
ABHD13	PAXIP1	2	1	1
ABHD13	PCDH10	2	1	1
ABHD13	PCDH18	2	1	1
ABHD13	PCMTD1	1	1	0
ABHD13	PDE10A	2	1	1
ABHD13	PDE8A	2	1	1
ABHD13	PDE8B	1	0	1
ABHD13	PDS5A	2	1	1
ABHD13	PHF3	2	1	1
ABHD13	PHIP	2	1	1
ABHD13	PKN2	2	1	1
ABHD13	PPM1B	2	1	1
ABHD13	PPP1R12A	2	1	1
ABHD13	PPP3R1	2	1	1
ABHD13	PRKAR1A	2	1	1
ABHD13	PTPN14	2	1	1
ABHD13	PTPRK	2	1	1
ABHD13	PUM2	2	1	1
ABHD13	RAB23	2	1	1
ABHD13	RAB8B	2	1	1
ABHD13	RANBP9	2	1	1
ABHD13	RAP1A	2	1	1
ABHD13	RAP2C	2	1	1
ABHD13	RASA1	2	1	1
ABHD13	RBM12	2	1	1
ABHD13	RECK	2	1	1
ABHD13	RNF19A	2	1	1
ABHD13	RNF4	2	1	1
ABHD13	RSBN1	2	1	1
ABHD13	SDC2	2	1	1
ABHD13	SERTAD2	2	1	1
ABHD13	SHOX2	1	0	1
ABHD13	SLAIN2	2	1	1
ABHD13	SLC12A2	2	1	1
ABHD13	SLC25A36	2	1	1
ABHD13	SLC37A3	1	0	1
ABHD13	SLC44A5	1	0	1
ABHD13	SNAI2	2	1	1
ABHD13	SNAP91	1	0	1
ABHD13	SNX13	2	1	1
ABHD13	SNX29	2	1	1
ABHD13	SOX11	2	1	1
ABHD13	SOX6	1	0	1
ABHD13	SRPK2	2	1	1
ABHD13	STAC	1	0	1
ABHD13	SYNCRIP	2	1	1
ABHD13	TEK	2	1	1
ABHD13	TMEM64	2	1	1
ABHD13	TOPORS	2	1	1
ABHD13	TOX	1	0	1
ABHD13	TSHZ3	2	1	1
ABHD13	TWF1	2	1	1
ABHD13	UBE2E1	2	1	1
ABHD13	UBR5	2	1	1
ABHD13	USP9Y	1	1	0
ABHD13	VEZF1	2	1	1
ABHD13	VPS36	2	1	1
ABHD13	YIPF4	2	1	1
ABHD13	YTHDF3	2	1	1
ABHD13	ZEB2	2	1	1
ABHD13	ZFHX4	2	1	1
ABHD13	ZHX1	2	1	1
ABHD13	ZNF148	2	1	1
ABHD13	ZNF449	2	1	1
ABHD13	ZNF532	2	1	1
ABHD2	ANKIB1	2	1	1
ABHD2	ANKRD11	1	1	0
ABHD2	AP4E1	2	1	1
ABHD2	BTG3	1	0	1
ABHD2	C7orf60	2	1	1
ABHD2	CDC37L1	2	1	1
ABHD2	CDK8	2	1	1
ABHD2	CELF2	2	1	1
ABHD2	CIT	2	1	1
ABHD2	CREB5	1	1	0
ABHD2	CREM	1	1	0
ABHD2	DENND5B	1	0	1
ABHD2	DMD	2	1	1
ABHD2	EIF2C1	2	1	1
ABHD2	EPHB2	1	0	1
ABHD2	FAM117B	1	1	0
ABHD2	FCHO2	2	1	1
ABHD2	GJA1	2	1	1
ABHD2	GNPDA2	2	1	1
ABHD2	HGF	2	1	1
ABHD2	HMGA2	2	1	1
ABHD2	HNRNPU	2	1	1
ABHD2	KLHL15	2	1	1
ABHD2	MAGI3	2	1	1
ABHD2	MAP3K1	2	1	1
ABHD2	MYEF2	2	1	1
ABHD2	NBEAL1	2	1	1
ABHD2	NCK2	1	0	1
ABHD2	NCOA3	2	1	1
ABHD2	NIN	2	1	1
ABHD2	NPC1	2	1	1
ABHD2	NRG3	1	1	0
ABHD2	OTUD1	2	1	1
ABHD2	PFN2	1	0	1
ABHD2	PKD2	2	1	1
ABHD2	PREX1	1	0	1
ABHD2	PTPN13	2	1	1
ABHD2	RFX7	2	1	1
ABHD2	RORA	2	1	1
ABHD2	RUNX1	2	1	1
ABHD2	SYBU	2	1	1
ABHD2	TFDP1	2	1	1
ABHD2	TIMP3	2	1	1
ABHD2	TNRC6B	2	1	1
ABHD2	TWF1	2	1	1
ABHD2	VGLL4	1	1	0
ABHD2	WNK3	2	1	1
ABHD2	ZC3H7B	1	1	0
ABHD2	ZHX2	2	1	1
ABHD2	ZNF148	2	1	1
ABHD3	ANKRD13C	1	0	1
ABHD3	APC	1	0	1
ABHD3	ARHGAP12	2	1	1
ABHD3	ARID4A	2	1	1
ABHD3	ARID4B	2	1	1
ABHD3	ASAP1	2	1	1
ABHD3	ASH1L	2	1	1
ABHD3	ATXN1	1	0	1
ABHD3	BRWD1	2	1	1
ABHD3	C2orf69	2	1	1
ABHD3	C5orf24	2	1	1
ABHD3	CALM2	2	1	1
ABHD3	CDK17	1	0	1
ABHD3	CDK2	2	1	1
ABHD3	CGGBP1	2	1	1
ABHD3	CHD9	1	1	0
ABHD3	CIT	1	1	0
ABHD3	CPEB2	1	0	1
ABHD3	CPEB3	2	1	1
ABHD3	CPSF6	2	1	1
ABHD3	CUL3	1	0	1
ABHD3	DCAF12	1	0	1
ABHD3	DCUN1D1	2	1	1
ABHD3	DERL2	1	1	0
ABHD3	DNAJB14	2	1	1
ABHD3	DPP8	1	0	1
ABHD3	EFR3A	1	0	1
ABHD3	ERBB3	1	0	1
ABHD3	FBXL17	2	1	1
ABHD3	FBXO28	2	1	1
ABHD3	FCHO2	2	1	1
ABHD3	FMR1	2	1	1
ABHD3	FNDC3A	2	1	1
ABHD3	FOXP1	1	0	1
ABHD3	GALNT4	2	1	1
ABHD3	GCLC	1	1	0
ABHD3	GPBP1	1	0	1
ABHD3	GRM5	1	0	1
ABHD3	HBP1	2	1	1
ABHD3	HECTD2	2	1	1
ABHD3	HIPK3	2	1	1
ABHD3	HMGXB4	1	0	1
ABHD3	HNRNPK	2	1	1
ABHD3	IKZF2	1	0	1
ABHD3	IKZF4	1	0	1
ABHD3	IRF2	2	1	1
ABHD3	KAT6A	1	0	1
ABHD3	KIAA1462	1	0	1
ABHD3	KIF13A	2	1	1
ABHD3	KLF3	2	1	1
ABHD3	KLHL15	2	1	1
ABHD3	LCORL	1	0	1
ABHD3	LRIG1	1	0	1
ABHD3	LYPD6	1	0	1
ABHD3	LYSMD3	2	1	1
ABHD3	MARK1	1	0	1
ABHD3	MBNL1	2	1	1
ABHD3	MIER1	2	1	1
ABHD3	MIER3	2	1	1
ABHD3	MLL	2	1	1
ABHD3	MLL3	2	1	1
ABHD3	MTF1	2	1	1
ABHD3	MYB	1	0	1
ABHD3	MYBL1	1	0	1
ABHD3	MYLIP	1	0	1
ABHD3	NAA16	2	1	1
ABHD3	NEK9	2	1	1
ABHD3	NFIA	1	0	1
ABHD3	NPAT	1	1	0
ABHD3	NR1D2	1	0	1
ABHD3	NR2C2	2	1	1
ABHD3	NR4A2	2	1	1
ABHD3	NUFIP2	2	1	1
ABHD3	OTUD4	2	1	1
ABHD3	PAPD5	2	1	1
ABHD3	PAPOLA	2	1	1
ABHD3	PDIK1L	2	1	1
ABHD3	PFN2	1	0	1
ABHD3	PHF14	1	0	1
ABHD3	PHF2	1	0	1
ABHD3	PIK3CA	1	0	1
ABHD3	POLK	2	1	1
ABHD3	PSEN1	2	1	1
ABHD3	PTPRG	1	0	1
ABHD3	PWWP2A	1	0	1
ABHD3	RABEP1	2	1	1
ABHD3	RACGAP1	1	0	1
ABHD3	RBL2	2	1	1
ABHD3	RBM25	1	0	1
ABHD3	RNF145	1	0	1
ABHD3	RNF38	2	1	1
ABHD3	RPS6KA5	1	0	1
ABHD3	RSBN1	2	1	1
ABHD3	RSBN1L	2	1	1
ABHD3	SAR1B	2	1	1
ABHD3	SLAIN2	1	0	1
ABHD3	SLC16A6	1	0	1
ABHD3	SLC35F5	2	1	1
ABHD3	SLC44A1	2	1	1
ABHD3	SOX6	1	0	1
ABHD3	SPOPL	2	1	1
ABHD3	SRSF7	2	1	1
ABHD3	STAG2	2	1	1
ABHD3	STARD13	1	0	1
ABHD3	SYNJ1	2	1	1
ABHD3	TARDBP	2	1	1
ABHD3	TBL1XR1	2	1	1
ABHD3	TMED7-TICAM2	1	0	1
ABHD3	TRAPPC8	2	1	1
ABHD3	TWF1	1	0	1
ABHD3	UBE2W	2	1	1
ABHD3	UBE3A	2	1	1
ABHD3	UVRAG	1	0	1
ABHD3	VLDLR	1	0	1
ABHD3	VMP1	1	0	1
ABHD3	WEE1	2	1	1
ABHD3	ZBTB11	2	1	1
ABHD3	ZFPM2	1	0	1
ABHD3	ZNF148	2	1	1
ABHD3	ZNF217	1	0	1
ABHD3	ZNF236	2	1	1
ABHD3	ZNF367	2	1	1
ABHD4	ARID5B	1	1	0
ABHD4	CASD1	1	1	0
ABHD4	GIT2	2	1	1
ABHD5	ARPP19	2	1	1
ABHD5	GSK3B	2	1	1
ABHD5	IL1RAP	1	1	0
ABHD5	KIAA0895	1	1	0
ABHD5	LMLN	2	1	1
ABHD5	LRRC58	2	1	1
ABHD5	MIB1	2	1	1
ABHD5	NCKIPSD	2	1	1
ABHD5	NCOA4	1	1	0
ABHD5	PTBP3	2	1	1
ABHD5	RNF141	2	1	1
ABHD5	RNF19A	2	1	1
ABHD5	SCAF11	2	1	1
ABHD6	AGGF1	2	1	1
ABI1	ACBD5	2	1	1
ABI1	ACPL2	2	1	1
ABI1	ADAM9	2	1	1
ABI1	AEBP2	2	1	1
ABI1	AFF4	2	1	1
ABI1	AFTPH	2	1	1
ABI1	AKAP9	2	1	1
ABI1	AKT3	2	1	1
ABI1	AKTIP	2	1	1
ABI1	ALCAM	2	1	1
ABI1	ALDH1A3	2	1	1
ABI1	ALX4	2	1	1
ABI1	AMBRA1	2	1	1
ABI1	ANKFY1	2	1	1
ABI1	ANKH	1	1	0
ABI1	ANKIB1	2	1	1
ABI1	ANKRA2	2	1	1
ABI1	ANKRD13C	2	1	1
ABI1	ANKRD28	2	1	1
ABI1	ANKRD50	2	1	1
ABI1	AP1G1	2	1	1
ABI1	APPL1	2	1	1
ABI1	ARAP2	2	1	1
ABI1	ARF6	2	1	1
ABI1	ARHGAP1	2	1	1
ABI1	ARHGAP12	2	1	1
ABI1	ARHGAP35	2	1	1
ABI1	ARHGEF10	1	0	1
ABI1	ARHGEF3	2	1	1
ABI1	ARID4B	2	1	1
ABI1	ARL4A	2	1	1
ABI1	ARNT	2	1	1
ABI1	ARPP21	2	1	1
ABI1	ARRDC3	2	1	1
ABI1	ASF1A	2	1	1
ABI1	ASH1L	2	1	1
ABI1	ATAD2B	2	1	1
ABI1	ATG14	2	1	1
ABI1	ATG2B	2	1	1
ABI1	ATG7	2	1	1
ABI1	ATL2	2	1	1
ABI1	ATL3	2	1	1
ABI1	ATP1B1	1	1	0
ABI1	ATP2B1	2	1	1
ABI1	ATP6V0E1	1	0	1
ABI1	ATPBD4	2	1	1
ABI1	ATRN	2	1	1
ABI1	ATRX	2	1	1
ABI1	ATXN1	2	1	1
ABI1	ATXN7L1	2	1	1
ABI1	B3GALT2	1	1	0
ABI1	BAHD1	2	1	1
ABI1	BAZ1A	2	1	1
ABI1	BAZ2A	2	1	1
ABI1	BBX	2	1	1
ABI1	BCL11A	1	0	1
ABI1	BCL11B	2	1	1
ABI1	BCL2L11	2	1	1
ABI1	BCL6	1	1	0
ABI1	BECN1	2	1	1
ABI1	BHLHE41	2	1	1
ABI1	BICD2	2	1	1
ABI1	BIRC6	2	1	1
ABI1	BIVM	2	1	1
ABI1	BNC2	2	1	1
ABI1	BNIP2	2	1	1
ABI1	BRMS1L	2	1	1
ABI1	BRWD1	2	1	1
ABI1	BTAF1	2	1	1
ABI1	BTBD10	2	1	1
ABI1	BTBD7	2	1	1
ABI1	C11orf30	2	1	1
ABI1	C14orf28	1	0	1
ABI1	C16orf52	2	1	1
ABI1	C16orf70	2	1	1
ABI1	C17orf104	2	1	1
ABI1	C20orf112	2	1	1
ABI1	C5orf24	2	1	1
ABI1	C5orf30	2	1	1
ABI1	C6orf62	2	1	1
ABI1	C7orf60	2	1	1
ABI1	C8orf59	1	0	1
ABI1	CA10	2	1	1
ABI1	CACNB4	2	1	1
ABI1	CADM2	2	1	1
ABI1	CAMSAP2	2	1	1
ABI1	CAMTA1	2	1	1
ABI1	CAPRIN1	2	1	1
ABI1	CAPRIN2	2	1	1
ABI1	CASD1	2	1	1
ABI1	CASK	2	1	1
ABI1	CASP7	2	1	1
ABI1	CBFB	2	1	1
ABI1	CBLL1	2	1	1
ABI1	CCAR1	2	1	1
ABI1	CCDC85A	1	0	1
ABI1	CCDC88A	2	1	1
ABI1	CCNG2	1	0	1
ABI1	CCNJ	2	1	1
ABI1	CCNT2	2	1	1
ABI1	CDC37L1	2	1	1
ABI1	CDC42BPA	2	1	1
ABI1	CDK17	2	1	1
ABI1	CDK19	2	1	1
ABI1	CDKN2AIP	2	1	1
ABI1	CDS1	2	1	1
ABI1	CDYL	2	1	1
ABI1	CELF1	2	1	1
ABI1	CELF2	2	1	1
ABI1	CENPO	1	0	1
ABI1	CEP57	2	1	1
ABI1	CEP97	2	1	1
ABI1	CHD9	2	1	1
ABI1	CHSY3	2	1	1
ABI1	CHUK	2	1	1
ABI1	CIT	1	0	1
ABI1	CKS1B	1	0	1
ABI1	CLASP2	2	1	1
ABI1	CMIP	2	1	1
ABI1	CMPK1	2	1	1
ABI1	CNEP1R1	2	1	1
ABI1	CNIH	2	1	1
ABI1	CNOT2	2	1	1
ABI1	CNOT4	2	1	1
ABI1	CNOT6	2	1	1
ABI1	CNOT6L	2	1	1
ABI1	CNOT7	2	1	1
ABI1	COL4A5	1	0	1
ABI1	COPS2	2	1	1
ABI1	CPEB1	2	1	1
ABI1	CPEB2	2	1	1
ABI1	CPEB3	2	1	1
ABI1	CPEB4	2	1	1
ABI1	CPSF6	2	1	1
ABI1	CRAMP1L	2	1	1
ABI1	CREB1	2	1	1
ABI1	CREB5	2	1	1
ABI1	CREBBP	2	1	1
ABI1	CREBRF	2	1	1
ABI1	CREBZF	2	1	1
ABI1	CREM	2	1	1
ABI1	CRIM1	2	1	1
ABI1	CRY2	1	0	1
ABI1	CSE1L	2	1	1
ABI1	CSGALNACT1	2	1	1
ABI1	CTDSPL2	2	1	1
ABI1	CTR9	2	1	1
ABI1	CUL3	2	1	1
ABI1	CXCL12	2	1	1
ABI1	CYB5R4	2	1	1
ABI1	DCAF12	2	1	1
ABI1	DCAF8	2	1	1
ABI1	DCBLD2	2	1	1
ABI1	DCLK1	1	0	1
ABI1	DDX3X	2	1	1
ABI1	DDX5	2	1	1
ABI1	DEDD	2	1	1
ABI1	DENND4C	2	1	1
ABI1	DHX57	2	1	1
ABI1	DIP2A	2	1	1
ABI1	DIP2C	2	1	1
ABI1	DLC1	2	1	1
ABI1	DLG1	2	1	1
ABI1	DNAJB4	2	1	1
ABI1	DNAJB6	2	1	1
ABI1	DNAJB9	2	1	1
ABI1	DNAJC16	2	1	1
ABI1	DNAJC21	2	1	1
ABI1	DOCK4	2	1	1
ABI1	DPP10	2	1	1
ABI1	DPYSL2	2	1	1
ABI1	DPYSL5	2	1	1
ABI1	DYNC1LI2	2	1	1
ABI1	DYRK1A	2	1	1
ABI1	DYRK2	2	1	1
ABI1	E2F5	2	1	1
ABI1	EBF1	2	1	1
ABI1	EEA1	2	1	1
ABI1	EFHA2	1	1	0
ABI1	EFNB2	1	0	1
ABI1	EGR1	1	0	1
ABI1	EGR3	1	0	1
ABI1	ELAVL2	2	1	1
ABI1	ELK3	2	1	1
ABI1	ELOVL5	1	0	1
ABI1	EML4	2	1	1
ABI1	ENAH	2	1	1
ABI1	ENPP5	1	0	1
ABI1	EPAS1	2	1	1
ABI1	EPHB4	2	1	1
ABI1	EPS15	2	1	1
ABI1	ERBB2IP	2	1	1
ABI1	ERBB4	2	1	1
ABI1	EREG	1	1	0
ABI1	ERI1	2	1	1
ABI1	ERLIN2	1	1	0
ABI1	ESR1	2	1	1
ABI1	ETF1	2	1	1
ABI1	ETS1	2	1	1
ABI1	EYA4	2	1	1
ABI1	FAM102A	1	0	1
ABI1	FAM126B	2	1	1
ABI1	FAM171A1	2	1	1
ABI1	FAM179B	2	1	1
ABI1	FAM190B	2	1	1
ABI1	FAM210A	2	1	1
ABI1	FAM45A	2	1	1
ABI1	FAM60A	2	1	1
ABI1	FAM63B	2	1	1
ABI1	FAT1	2	1	1
ABI1	FAT4	2	1	1
ABI1	FBXL17	2	1	1
ABI1	FBXL3	2	1	1
ABI1	FBXO11	2	1	1
ABI1	FBXO28	2	1	1
ABI1	FBXO3	2	1	1
ABI1	FBXO33	2	1	1
ABI1	FBXW11	2	1	1
ABI1	FCHO2	2	1	1
ABI1	FEM1C	2	1	1
ABI1	FERMT2	2	1	1
ABI1	FGD4	2	1	1
ABI1	FGF7	1	1	0
ABI1	FILIP1L	2	1	1
ABI1	FOS	1	0	1
ABI1	FOXA1	2	1	1
ABI1	FOXJ2	2	1	1
ABI1	FOXJ3	2	1	1
ABI1	FOXP1	2	1	1
ABI1	FRMD6	2	1	1
ABI1	FSTL1	2	1	1
ABI1	FUBP1	2	1	1
ABI1	FUBP3	2	1	1
ABI1	FYCO1	2	1	1
ABI1	G3BP2	2	1	1
ABI1	GABRB2	2	1	1
ABI1	GALNT1	2	1	1
ABI1	GBF1	1	0	1
ABI1	GIT2	2	1	1
ABI1	GJA1	2	1	1
ABI1	GLYR1	2	1	1
ABI1	GMFB	2	1	1
ABI1	GNS	2	1	1
ABI1	GOSR1	2	1	1
ABI1	GPBP1	2	1	1
ABI1	GPM6A	1	1	0
ABI1	GPR158	2	1	1
ABI1	GPR180	2	1	1
ABI1	GPR37	1	0	1
ABI1	GRM5	1	0	1
ABI1	GSK3B	2	1	1
ABI1	GTF2H1	2	1	1
ABI1	HAS2	2	1	1
ABI1	HBP1	2	1	1
ABI1	HDAC9	2	1	1
ABI1	HEY2	2	1	1
ABI1	HIAT1	2	1	1
ABI1	HIF1A	2	1	1
ABI1	HIVEP2	2	1	1
ABI1	HMGCS1	2	1	1
ABI1	HNRNPH3	2	1	1
ABI1	HNRNPK	2	1	1
ABI1	HOOK3	2	1	1
ABI1	HOXA3	2	1	1
ABI1	HOXA9	2	1	1
ABI1	HP1BP3	2	1	1
ABI1	HSPA8	2	1	1
ABI1	ID1	1	0	1
ABI1	IGF1	2	1	1
ABI1	IGF2BP1	2	1	1
ABI1	IKZF4	2	1	1
ABI1	ILF3	1	1	0
ABI1	INO80	2	1	1
ABI1	INO80D	2	1	1
ABI1	INTS6	2	1	1
ABI1	IREB2	2	1	1
ABI1	IRF2BPL	2	1	1
ABI1	ITCH	2	1	1
ABI1	ITGA11	1	0	1
ABI1	ITGA4	2	1	1
ABI1	ITGA6	2	1	1
ABI1	ITGB8	1	0	1
ABI1	ITPRIPL2	1	0	1
ABI1	JAK1	2	1	1
ABI1	JAZF1	2	1	1
ABI1	JHDM1D	2	1	1
ABI1	KAT2B	2	1	1
ABI1	KBTBD2	2	1	1
ABI1	KBTBD8	2	1	1
ABI1	KCNJ10	2	1	1
ABI1	KCNK10	2	1	1
ABI1	KCTD3	2	1	1
ABI1	KDM2A	2	1	1
ABI1	KDM6A	2	1	1
ABI1	KDM6B	1	0	1
ABI1	KHSRP	2	1	1
ABI1	KIAA0494	2	1	1
ABI1	KIAA0922	1	0	1
ABI1	KIAA1598	2	1	1
ABI1	KIF13A	2	1	1
ABI1	KIF23	1	0	1
ABI1	KIF26B	2	1	1
ABI1	KIF5A	1	1	0
ABI1	KIF5B	2	1	1
ABI1	KIF5C	1	0	1
ABI1	KLF10	2	1	1
ABI1	KLF11	2	1	1
ABI1	KLF3	2	1	1
ABI1	KLHL15	2	1	1
ABI1	KLHL2	2	1	1
ABI1	KLHL9	2	1	1
ABI1	KPNA2	1	0	1
ABI1	KPNA3	2	1	1
ABI1	KPNA4	2	1	1
ABI1	KPNA6	2	1	1
ABI1	LACE1	2	1	1
ABI1	LARP4B	2	1	1
ABI1	LASP1	1	0	1
ABI1	LCLAT1	2	1	1
ABI1	LCOR	2	1	1
ABI1	LCORL	2	1	1
ABI1	LIMA1	2	1	1
ABI1	LMBRD2	1	1	0
ABI1	LMNB1	1	0	1
ABI1	LPGAT1	2	1	1
ABI1	LPHN2	2	1	1
ABI1	LPHN3	2	1	1
ABI1	LRCH1	2	1	1
ABI1	LRCH2	2	1	1
ABI1	LRP12	2	1	1
ABI1	LRP4	2	1	1
ABI1	LRRC1	2	1	1
ABI1	MACF1	1	1	0
ABI1	MACROD2	2	1	1
ABI1	MAF	2	1	1
ABI1	MAGI1	2	1	1
ABI1	MAGI3	2	1	1
ABI1	MAML3	2	1	1
[truncated: 553,520+ more rows]

## Sheet: RNA1 -> RNA2
RNA1	RNA2	Adjusted Pval (overlap)	Adjusted Pval (expression)
A2LD1	KLF9	0.0068	3.267e-07
AAK1	AHNAK	0.0004528	1.281e-10
AAK1	BCL2L11	0.004644	1.086e-10
AAK1	C11orf82	0.002179	6.998e-08
AAK1	C3orf38	0.007554	6.327e-07
AAK1	CAPRIN2	0.0004534	1.261e-17
AAK1	FRMD4A	0.00778	7.115e-06
AAK1	FYCO1	0.004048	2.805e-07
AAK1	GMCL1	0.002768	5.074e-16
AAK1	HBP1	0.004308	6.888e-10
AAK1	HOOK3	0.001753	1.731e-15
AAK1	ITFG1	0.003389	3.991e-07
AAK1	MAP3K9	0.008029	2.847e-14
AAK1	MASTL	0.000552	7.413e-07
AAK1	MTPAP	0.006438	6.716e-07
AAK1	NBEAL1	0.004852	4.689e-10
AAK1	ROCK2	0.005702	2.189e-18
AAK1	SLC35F5	0.002298	1.134e-11
AAK1	TAGAP	0.0005853	4.845e-06
AAK1	ZBTB4	0.004505	8.762e-10
AAK1	ZNFX1	0.005937	1.616e-12
AASDHPPT	RPAP3	0.004809	1.914e-06
ABAT	CCNG2	0.006259	3.556e-07
ABAT	FOXN3	0.009182	7.932e-09
ABAT	NPAT	0.00247	1.043e-06
ABAT	SEZ6L	0.004469	8.288e-07
ABAT	ZBTB34	0.001521	7.61e-06
ABCA1	ABCB7	0.00343	5.318e-06
ABCA1	ABI1	2.523e-05	7.738e-14
ABCA1	ACBD5	3.174e-11	6.211e-12
ABCA1	ACVR1	0.0001053	2.867e-14
ABCA1	ACVR1C	3.147e-07	2.296e-08
ABCA1	ADAM9	0.002116	4.766e-10
ABCA1	ADAMTS18	1.642e-05	8.75e-08
ABCA1	ADAMTSL3	0.004788	3.629e-06
ABCA1	AEBP2	0.005346	8.609e-13
ABCA1	AKAP11	0.0057	1.142e-07
ABCA1	AKAP7	0.008956	2.628e-07
ABCA1	AKAP9	0.006299	1.673e-08
ABCA1	AKTIP	0.001078	8.876e-06
ABCA1	ALS2CR8	0.002586	1.007e-08
ABCA1	AMMECR1	0.005299	4.835e-08
ABCA1	ANK2	0.0003005	8.146e-15
ABCA1	ANKIB1	0.00129	4.272e-17
ABCA1	ANKRD11	2.858e-05	5.536e-09
ABCA1	ANKRD12	0.003635	1.723e-07
ABCA1	ANKRD13C	5.934e-07	6.051e-13
ABCA1	ANKRD50	8.147e-07	1.423e-10
ABCA1	ANKRD52	0.001054	2.184e-14
ABCA1	ANO6	0.007049	3.92e-11
ABCA1	API5	1.636e-05	2.498e-08
ABCA1	APPL1	0.002461	2.444e-13
ABCA1	ARAP2	0.0003869	1.117e-11
ABCA1	ARFGEF1	0.000173	2.611e-08
ABCA1	ARHGAP12	4.769e-05	2.77e-07
ABCA1	ARHGAP21	8.561e-05	1.876e-12
ABCA1	ARHGEF10	0.008416	6.791e-06
ABCA1	ARHGEF12	0.00547	3.514e-10
ABCA1	ARHGEF17	0.0004554	1.152e-07
ABCA1	ARHGEF18	0.0003468	4.623e-06
ABCA1	ARHGEF4	0.0075	1.137e-06
ABCA1	ARHGEF7	0.001376	2.138e-07
ABCA1	ARID4A	0.009947	4.115e-15
ABCA1	ARID4B	8.796e-05	2.17e-11
ABCA1	ARID5B	3e-06	4.122e-08
ABCA1	ARRDC3	0.0005842	6.847e-12
ABCA1	ASAP1	0.0007698	3.305e-18
ABCA1	ASH1L	0.0001292	9.805e-12
ABCA1	ASXL2	6.259e-05	1.479e-11
ABCA1	ATAD2B	0.006089	2.708e-12
ABCA1	ATG14	0.0016	1.29e-08
ABCA1	ATG16L1	0.004359	4.609e-06
ABCA1	ATL2	0.002675	2.774e-10
ABCA1	ATL3	2.439e-06	9.552e-07
ABCA1	ATP11A	0.001704	1.082e-09
ABCA1	ATP2B1	0.0001438	1.319e-16
ABCA1	ATXN1	2.826e-05	1.655e-14
ABCA1	ATXN7L1	2.658e-05	2.147e-07
ABCA1	B4GALT6	0.000403	8.036e-10
ABCA1	BACH2	0.005193	6.934e-12
ABCA1	BARX2	0.0009246	4.529e-06
ABCA1	BBX	9.042e-06	1.201e-19
ABCA1	BCL11B	5.262e-05	5.054e-09
ABCA1	BCL2L11	6.423e-09	3.955e-10
ABCA1	BCL6	0.002425	6.008e-06
ABCA1	BHLHE41	0.0005042	4.43e-10
ABCA1	BNC2	0.000203	5.401e-14
ABCA1	BPTF	0.004944	2.205e-10
ABCA1	BRWD1	2.469e-06	4.39e-09
ABCA1	BRWD3	0.0004528	4.439e-15
ABCA1	BTAF1	0.004575	1.184e-21
ABCA1	BTBD10	0.000444	7.486e-07
ABCA1	BTBD7	2.685e-06	3.666e-12
ABCA1	C10orf12	6.155e-06	2.69e-10
ABCA1	C11orf82	1.172e-05	6.67e-06
ABCA1	C16orf70	9.355e-06	2.305e-08
ABCA1	C1GALT1	0.0002514	8.071e-08
ABCA1	C2orf69	0.002853	2.511e-08
ABCA1	C3orf58	0.003091	1.779e-10
ABCA1	C5orf24	0.0009704	4.032e-21
ABCA1	C7orf60	0.0003153	1.46e-16
ABCA1	CAMSAP2	0.0001165	6.886e-12
ABCA1	CAMTA1	2.933e-06	2.852e-07
ABCA1	CAPRIN2	1.025e-06	1.47e-09
ABCA1	CASZ1	0.0001416	4.194e-07
ABCA1	CBFB	0.003899	1.192e-14
ABCA1	CC2D1A	4.495e-05	9.55e-06
ABCA1	CCDC85A	3.047e-05	3.384e-06
ABCA1	CCDC88A	0.003216	5.104e-20
ABCA1	CCND2	0.004121	5.692e-09
ABCA1	CDC23	0.006204	2.61e-06
ABCA1	CDK17	0.001946	1.659e-10
ABCA1	CDK2	4.315e-05	1.072e-09
ABCA1	CELF2	0.001311	3.732e-19
ABCA1	CEP120	0.002659	3.334e-11
ABCA1	CEP170	0.0003971	2.271e-17
ABCA1	CERS6	0.001404	1.766e-06
ABCA1	CHD2	0.0001696	1.376e-11
ABCA1	CIT	0.0004596	6.759e-06
ABCA1	CLDND1	2.192e-05	1.126e-06
ABCA1	CLIP1	0.0001592	1.19e-07
ABCA1	CLIP4	0.007679	7.942e-11
ABCA1	CLOCK	0.00148	6.87e-19
ABCA1	CMPK1	0.0007669	3.599e-11
ABCA1	CNEP1R1	0.005498	5.294e-16
ABCA1	CNOT4	0.001836	2.481e-13
ABCA1	CNOT6	3.56e-05	2.319e-14
ABCA1	CNOT7	0.0001294	1.084e-10
ABCA1	COL10A1	0.0006034	4.391e-06
ABCA1	COL4A1	0.002115	2.292e-06
ABCA1	CPEB1	0.002288	4.286e-07
ABCA1	CPEB4	0.0001112	2.028e-10
ABCA1	CPNE2	0.0002415	7.029e-09
ABCA1	CPSF6	0.005713	1.182e-13
ABCA1	CREB1	5.431e-07	5.765e-18
ABCA1	CREB5	0.0009151	2.567e-10
ABCA1	CREBRF	0.0002315	1.522e-16
ABCA1	CRIM1	0.00453	1.665e-12
ABCA1	CRK	0.005677	5.563e-10
ABCA1	CSF1	0.002461	5.499e-06
ABCA1	CSRP2	0.001572	6.179e-06
ABCA1	CUL3	2.916e-07	3.631e-06
ABCA1	CXCL12	0.002043	1.587e-10
ABCA1	CYB5R4	0.001704	3.018e-12
ABCA1	DAB2	0.008942	2.583e-12
ABCA1	DAZAP2	0.008626	2.087e-11
ABCA1	DDX5	0.0052	3.187e-08
ABCA1	DENND4C	3.309e-06	4.301e-09
ABCA1	DERL2	0.000932	3.624e-06
ABCA1	DLC1	1.165e-05	4.799e-15
ABCA1	DMTF1	0.0007394	2.765e-07
ABCA1	DNAJB9	0.001128	2.717e-07
ABCA1	DNAJC16	0.001152	4.393e-07
ABCA1	DOCK11	0.001258	1.541e-13
ABCA1	DOCK3	0.005103	5.874e-07
ABCA1	DRD1	2.192e-05	2.776e-06
ABCA1	DYNC1LI2	0.002824	1.501e-13
ABCA1	DYRK2	0.004817	8.93e-21
ABCA1	E2F3	0.0002699	4.024e-07
ABCA1	E2F5	4.113e-05	3.04e-06
ABCA1	EBF3	3.822e-05	2.179e-07
ABCA1	ECT2	0.004719	8.907e-06
ABCA1	EFNA5	1.977e-07	2.94e-06
ABCA1	EFNB2	2.907e-08	2.995e-06
ABCA1	EFR3A	0.002941	3.197e-10
ABCA1	EGR3	0.0004866	7.743e-07
ABCA1	EIF2C1	0.0001316	2.971e-11
ABCA1	EIF4E3	0.0003208	2.52e-09
ABCA1	ELK3	0.0002841	5.631e-15
ABCA1	EOGT	0.003362	5.064e-09
ABCA1	EPAS1	0.0001801	4.142e-09
ABCA1	EPS15	0.003681	4.854e-16
ABCA1	ERBB2IP	3.499e-05	4.593e-12
ABCA1	ERI1	6.731e-06	1.022e-09
ABCA1	ETNK1	0.001017	1.149e-08
ABCA1	EYA4	0.000928	6.378e-06
ABCA1	FAM107B	2.207e-05	3.114e-07
ABCA1	FAM117A	0.001401	2.651e-06
ABCA1	FAM123A	0.002461	7.518e-08
ABCA1	FAM168B	0.004836	3.211e-09
ABCA1	FAM178A	0.00866	3.39e-13
ABCA1	FAM60A	2.353e-05	1.38e-08
ABCA1	FAT3	0.0001575	4.537e-09
ABCA1	FBXO10	6.766e-05	4.652e-11
ABCA1	FBXO28	1.1e-05	7.796e-08
ABCA1	FBXW11	1.821e-05	1.483e-18
ABCA1	FCHO1	0.005922	3.813e-08
ABCA1	FERMT2	0.00107	1.565e-11
ABCA1	FGD4	6.124e-05	8.095e-12
ABCA1	FIBIN	0.0007322	7.242e-07
ABCA1	FIGN	0.009292	6.313e-11
ABCA1	FILIP1L	0.0003994	3.042e-09
ABCA1	FN1	0.008402	1.231e-08
ABCA1	FNBP4	1.733e-05	5.521e-08
ABCA1	FNDC3A	9.933e-06	5.267e-20
ABCA1	FNDC3B	6.265e-05	7.084e-13
ABCA1	FOXF1	0.0001884	2.101e-07
ABCA1	FOXP1	0.0005697	1.246e-08
ABCA1	FRMD4A	9.996e-05	5.51e-10
ABCA1	FRMD4B	0.005722	5.164e-09
ABCA1	FRMD6	9.476e-05	8.614e-08
ABCA1	FRS2	0.007046	2.72e-08
ABCA1	FYCO1	1.591e-06	1.58e-08
ABCA1	G3BP2	0.0002531	3.266e-13
ABCA1	GABPB1	0.0008031	1.872e-07
ABCA1	GDF11	0.004294	2.49e-09
ABCA1	GIT2	0.0003797	1.546e-15
ABCA1	GLIS2	0.009336	8.954e-09
ABCA1	GMCL1	0.001736	1.374e-08
ABCA1	GMFB	2.152e-05	8.949e-09
ABCA1	GNPDA2	0.0006538	1.09e-06
ABCA1	GNS	1.729e-05	1.922e-11
ABCA1	GPC6	0.003216	1.119e-11
ABCA1	GPCPD1	6.067e-05	6.223e-06
ABCA1	GPM6A	6.056e-05	4.09e-06
ABCA1	GPR137B	0.007355	5.793e-08
ABCA1	GPR137C	0.001399	2.99e-07
ABCA1	GPR158	9.524e-06	3.365e-06
ABCA1	GRIN3A	0.0001715	2.216e-09
ABCA1	GRM5	0.000232	3.789e-09
ABCA1	GSK3B	0.00117	1.59e-16
ABCA1	GUCY1A3	3.58e-07	7.377e-08
ABCA1	HBP1	9.483e-05	2.093e-09
ABCA1	HBS1L	0.001258	4.838e-06
ABCA1	HCFC2	0.004836	4.201e-14
ABCA1	HEG1	0.00138	7.954e-13
ABCA1	HIAT1	8.573e-05	1.282e-17
ABCA1	HIF1A	0.003296	2.781e-11
ABCA1	HIVEP2	0.0007039	8.024e-10
ABCA1	HNRNPH3	0.0004494	3.356e-06
ABCA1	HOOK3	2.968e-07	1.803e-12
ABCA1	HOXD8	0.002745	8.285e-09
ABCA1	HS2ST1	0.003285	5.069e-15
ABCA1	HSPA8	3.449e-08	1.544e-13
ABCA1	HTR7	0.005345	4.257e-11
ABCA1	IGF1	0.001597	1.274e-10
ABCA1	IGFBP5	0.003145	2.965e-08
ABCA1	IGSF3	6.259e-05	2.368e-07
ABCA1	IKZF2	0.007954	6.279e-15
ABCA1	IKZF4	5.171e-05	1.994e-13
ABCA1	IL6ST	1.607e-05	1.623e-13
ABCA1	INO80	3.535e-06	9.746e-14
ABCA1	INTS6	0.001294	9.2e-08
ABCA1	IPO7	0.00112	8.011e-12
ABCA1	IPO8	0.000211	9.426e-13
ABCA1	IQGAP2	0.002398	3.989e-06
ABCA1	IQSEC1	4.113e-05	3.98e-09
ABCA1	ITGA11	1.264e-05	1.633e-08
ABCA1	ITGA4	9.169e-05	6.357e-12
ABCA1	ITM2C	0.004701	6.936e-06
ABCA1	ITPR1	0.003138	8.416e-10
ABCA1	JAK1	0.0001565	9.487e-10
ABCA1	JAZF1	0.003144	3.8e-11
ABCA1	JMY	0.001356	3.173e-13
ABCA1	KANSL1	0.003358	1.065e-07
ABCA1	KAT6A	0.0002952	5.375e-13
ABCA1	KBTBD8	4.448e-05	1.279e-19
ABCA1	KCNIP2	0.00256	8.396e-06
ABCA1	KCNK10	2.092e-05	2.2e-06
ABCA1	KCNK2	0.002306	4.287e-07
ABCA1	KIAA0240	0.0001066	1.474e-10
ABCA1	KIAA0947	0.008765	4.497e-13
ABCA1	KIAA1217	0.005121	3.253e-11
ABCA1	KIAA1462	0.0001174	2.465e-12
ABCA1	KIAA1468	0.0002043	1.007e-09
ABCA1	KIAA2018	0.001757	1.778e-13
ABCA1	KIAA2022	0.003414	2.196e-08
ABCA1	KIF13A	0.0001272	1.13e-06
ABCA1	KIF26B	0.0004022	4.506e-08
ABCA1	KIT	0.005006	5.21e-07
ABCA1	KLF10	0.0004531	1.164e-16
ABCA1	KLF12	0.003042	4.737e-16
ABCA1	KLF3	0.003758	9.563e-18
ABCA1	KLHL2	2.523e-05	3.432e-09
ABCA1	KLHL28	0.002127	3.816e-17
ABCA1	KLHL3	0.002586	1.192e-07
ABCA1	KPNA3	9.042e-06	9.936e-13
ABCA1	KRAS	0.0003175	1.664e-13
ABCA1	L3MBTL3	0.004011	7.307e-08
ABCA1	LAMC1	0.0004688	1.814e-08
ABCA1	LARP4B	1.75e-06	4.636e-11
ABCA1	LBR	0.001113	1.012e-08
ABCA1	LCOR	2.247e-09	1.175e-16
ABCA1	LCORL	7.07e-06	7.635e-13
ABCA1	LDLR	9.844e-05	6.709e-06
ABCA1	LEF1	0.004031	1.644e-07
ABCA1	LHX6	0.0004729	3.753e-07
ABCA1	LRCH1	4.068e-07	4.099e-13
ABCA1	LRP12	0.0003953	8.503e-11
ABCA1	LRP4	1.05e-08	3.108e-06
ABCA1	LRP6	0.006107	4.742e-10
ABCA1	LY75	5.474e-05	1.974e-06
ABCA1	LYSMD3	4.886e-09	1.286e-14
ABCA1	MAGI1	0.0001391	3.468e-11
ABCA1	MAML1	0.009736	8.24e-12
ABCA1	MAN2A1	0.002054	1.381e-14
ABCA1	MAP1B	0.00745	2.299e-13
ABCA1	MAP3K1	0.001856	7.666e-15
ABCA1	MAP3K14	5.137e-09	7.988e-08
ABCA1	MAP3K2	0.0009835	2.223e-14
ABCA1	MAP3K5	3.047e-05	6.906e-11
ABCA1	MAP3K7	0.004836	7.715e-10
ABCA1	MAP4K3	0.001006	3.525e-08
ABCA1	MAP4K4	4.769e-05	3.867e-13
ABCA1	MAPK9	0.007679	4.894e-06
ABCA1	MARCH1	0.0009246	7.094e-14
ABCA1	MARCH11	1.716e-06	1.621e-06
ABCA1	MARCH6	0.0004013	1.325e-10
ABCA1	MARCH8	0.0006347	4.401e-08
ABCA1	MARS	0.004294	4.493e-07
ABCA1	MASTL	2.614e-07	1.105e-07
ABCA1	MAT2B	0.004836	8.827e-15
ABCA1	MBNL3	3.494e-06	2.653e-12
ABCA1	MCL1	1.865e-05	1.641e-11
ABCA1	MECOM	0.009947	3.073e-14
ABCA1	MED12L	3.459e-07	1.479e-06
ABCA1	MEX3C	0.009633	4.365e-10
ABCA1	MFN2	0.002652	2.275e-07
ABCA1	MGEA5	2.596e-05	9.682e-08
ABCA1	MIER3	2.824e-08	6.701e-15
ABCA1	MKL2	0.0001319	1.738e-09
ABCA1	MLL	4.188e-05	6.505e-06
ABCA1	MLL5	0.008357	8.129e-07
ABCA1	MLLT10	0.001157	3.908e-08
ABCA1	MTF1	1.837e-05	1.507e-16
ABCA1	MTMR12	0.006767	3.005e-12
ABCA1	MTMR6	0.001869	3.585e-11
ABCA1	MTMR9	0.0002963	2.272e-06
ABCA1	MYOCD	0.0002722	7.434e-06
ABCA1	MYT1L	2.613e-05	3.128e-07
ABCA1	NAA16	2.885e-05	6.355e-08
ABCA1	NABP1	0.002157	4.629e-08
ABCA1	NBEA	0.009547	2.06e-09
ABCA1	NCOA3	1.931e-05	6.807e-13
ABCA1	NCOA7	3.574e-05	4.304e-09
ABCA1	NEK9	0.0001593	2.532e-09
ABCA1	NFATC3	0.009699	2.03e-12
ABCA1	NFIB	0.001218	1.019e-08
ABCA1	NHS	0.001135	2.837e-11
ABCA1	NKX3-2	1.612e-06	1.299e-08
ABCA1	NOL4	1.917e-06	5.353e-06
ABCA1	NPAT	4.389e-05	1.598e-14
ABCA1	NPC1	0.0002889	2.547e-12
ABCA1	NPTX1	1.69e-05	4.515e-06
ABCA1	NR1D2	0.002124	7.662e-09
ABCA1	NR4A3	7.963e-05	4.441e-07
ABCA1	NR5A2	0.009577	5.872e-13
ABCA1	NRBF2	7.833e-05	3.914e-15
ABCA1	NRP1	0.006229	2.005e-11
ABCA1	NRP2	3.348e-06	3.36e-10
ABCA1	NUFIP2	0.0002994	1.91e-21
ABCA1	NUMB	0.0001682	4.08e-10
ABCA1	NUP205	0.005948	8.321e-06
ABCA1	NUS1	0.002984	5.956e-13
ABCA1	NXPH1	0.006634	2.221e-06
ABCA1	ODZ1	0.0009477	3.534e-07
ABCA1	OGDH	0.001869	1.932e-06
ABCA1	OSBPL10	0.008162	1.352e-06
ABCA1	OSTM1	0.0003063	6.965e-08
ABCA1	OTUD1	1.954e-05	1.144e-08
ABCA1	OTUD3	0.0009699	3.752e-07
ABCA1	OTUD4	2.354e-06	6.601e-21
ABCA1	OXR1	0.0009896	3.54e-14
ABCA1	PAFAH1B1	0.000191	2.261e-13
ABCA1	PALLD	0.003753	5.933e-12
ABCA1	PAN3	0.0009227	4.746e-13
ABCA1	PBX3	2.563e-06	1.499e-08
ABCA1	PCNX	0.002398	3.745e-16
ABCA1	PDE4B	3.154e-07	4.876e-07
ABCA1	PDE7B	0.0001416	1.264e-07
ABCA1	PDGFRA	6.101e-05	3.802e-17
ABCA1	PDIK1L	9.681e-07	1.512e-11
ABCA1	PGBD5	0.005793	2.411e-06
ABCA1	PHAX	9.169e-05	6.099e-08
ABCA1	PHF6	1.387e-06	7.879e-13
ABCA1	PIGA	0.007679	8.94e-08
ABCA1	PIK3C2A	2.227e-05	5.634e-14
ABCA1	PIP4K2A	0.008402	6.648e-06
ABCA1	PJA2	0.00176	1.659e-18
ABCA1	PKD2	0.0004504	3.395e-11
ABCA1	PKN2	4.349e-05	7.619e-14
ABCA1	PLAG1	0.005257	1.188e-09
ABCA1	PLCB1	0.0007251	3.452e-12
ABCA1	PLCL1	0.0007424	1.495e-07
ABCA1	PLEKHA3	0.003723	5.132e-08
ABCA1	PLEKHM1	0.00138	9.434e-07
ABCA1	PODXL	0.003014	1.534e-06
ABCA1	POLQ	0.0001952	1.946e-06
ABCA1	PPARGC1B	0.0001375	3.738e-13
ABCA1	PPFIA2	0.0005602	3.188e-11
ABCA1	PPP1R15B	0.002268	1.072e-12
ABCA1	PPP2R2A	9.163e-06	4.939e-11
ABCA1	PPP2R3A	1.5e-05	8.572e-07
ABCA1	PPP6R2	0.0003026	8.222e-07
ABCA1	PPP6R3	1.359e-05	1.195e-06
ABCA1	PRDM10	7.091e-05	2.453e-13
ABCA1	PRKAA1	0.0002717	3.487e-08
ABCA1	PRKACB	6.513e-05	9.141e-15
ABCA1	PRKD3	0.0003063	1.476e-15
ABCA1	PRR5L	0.0001316	2.963e-09
ABCA1	PRRG1	0.008706	5.509e-08
ABCA1	PRRX1	0.002303	3.145e-13
ABCA1	PSD3	0.003162	6.337e-07
ABCA1	PSEN1	1.02e-05	2.87e-08
ABCA1	PTBP3	0.0001874	4.465e-13
ABCA1	PTEN	0.005939	9.809e-11
ABCA1	PTK2	0.001221	1.7e-07
ABCA1	PTPDC1	0.006776	1.013e-08
ABCA1	PTPN2	0.0006736	5.391e-09
ABCA1	PTPN4	0.001547	3.01e-15
ABCA1	PTPRD	0.001194	1.146e-10
ABCA1	PURB	3.501e-05	1.408e-08
ABCA1	PWWP2A	0.003707	2.549e-12
ABCA1	PXDN	0.002349	5.555e-07
ABCA1	QSER1	0.0003765	1.64e-14
ABCA1	RAB21	0.005381	1.648e-08
ABCA1	RABEP1	8.634e-05	3.961e-07
ABCA1	RABGAP1	3.118e-07	6.647e-09
ABCA1	RACGAP1	4.075e-05	8.696e-07
ABCA1	RAD51B	0.003164	3.016e-07
ABCA1	RAP1B	0.00325	4.936e-12
ABCA1	RAP2C	0.0002466	1.192e-17
ABCA1	RAPGEF2	0.0001053	6.783e-13
ABCA1	RASSF2	0.004701	4.297e-10
ABCA1	RB1	0.004486	3.917e-10
ABCA1	RB1CC1	0.001353	2.387e-18
ABCA1	RBL1	0.001023	3.322e-10
ABCA1	RBL2	3.278e-06	7.105e-12
ABCA1	RBM20	0.0004594	9.776e-06
ABCA1	RBM25	0.00357	1.536e-08
ABCA1	RBMS2	0.004359	3.241e-08
ABCA1	RCOR1	0.001004	2.487e-12
ABCA1	RECK	0.0004317	5.56e-11
ABCA1	REEP3	0.0007604	6.156e-06
ABCA1	RELL1	0.0001603	9.709e-06
ABCA1	REV3L	0.002001	1.376e-12
ABCA1	RFX7	0.0005339	8.12e-17
ABCA1	RGL1	5.051e-05	1.807e-12
ABCA1	RHOT1	0.000468	1.657e-06
ABCA1	RICTOR	0.0009597	1.707e-18
ABCA1	RIN2	0.004788	1.734e-07
ABCA1	RLIM	2.267e-07	9.481e-15
ABCA1	RNF145	0.0001172	7.239e-10
ABCA1	RNF219	0.0006124	2.465e-07
ABCA1	RNF24	0.008619	4.217e-12
ABCA1	RNF38	1.822e-06	3.316e-12
ABCA1	ROBO1	0.002135	6.282e-12
ABCA1	ROCK2	3.739e-05	1.032e-15
ABCA1	RORA	5.031e-05	8.751e-17
ABCA1	RPS6KA5	3.751e-08	6.879e-08
ABCA1	RPS6KB1	0.001186	3.692e-11
ABCA1	RRAGD	6.824e-07	4.089e-12
ABCA1	RSBN1L	9.447e-05	1.049e-06
ABCA1	RSF1	0.0002064	1.789e-11
ABCA1	RSRC2	6.067e-05	2.107e-08
ABCA1	RTN1	0.0001013	9.425e-11
ABCA1	RUFY2	0.0001176	6.75e-11
ABCA1	RUNX2	0.0002257	7.051e-11
ABCA1	RUNX3	5.948e-05	4.874e-09
ABCA1	RYBP	0.008742	3.62e-06
ABCA1	S1PR1	0.0008375	1.006e-06
ABCA1	SAMD12	0.002984	3.348e-07
ABCA1	SAR1B	1.387e-06	1.428e-06
ABCA1	SATB2	0.008648	1.338e-10
ABCA1	SCML2	3.688e-06	4.98e-07
ABCA1	SCML4	0.0001475	7.453e-07
ABCA1	SCN1A	0.008112	4.231e-07
ABCA1	SCN2A	4.852e-05	2.433e-08
ABCA1	SCN3A	0.008775	1.435e-12
ABCA1	SECISBP2L	0.005231	1.925e-13
ABCA1	SEL1L3	0.007803	3.56e-07
ABCA1	SEMA6D	0.008316	6.873e-10
ABCA1	SEMA7A	0.001385	1.102e-07
ABCA1	SERINC3	0.007355	8.028e-13
ABCA1	SERTAD2	0.005874	3.794e-10
ABCA1	SETD7	0.003993	1.404e-10
ABCA1	SGCD	0.0003797	5.595e-08
ABCA1	SGTB	0.004701	4.775e-16
ABCA1	SIK1	6.221e-07	1.018e-07
ABCA1	SIRPA	0.008162	1.262e-08
ABCA1	SKI	0.00786	4.753e-10
ABCA1	SKIDA1	0.00118	2.356e-07
ABCA1	SLC24A2	9.687e-05	1.509e-12
ABCA1	SLC25A36	0.002398	2.182e-07
ABCA1	SLC33A1	3.197e-06	5.872e-12
ABCA1	SLC35F5	1.408e-05	3.326e-10
ABCA1	SLC38A2	3.303e-06	1.598e-09
ABCA1	SLC39A10	0.001746	2.719e-06
ABCA1	SLC4A4	0.006259	9.541e-09
ABCA1	SLC6A6	0.002604	3.687e-13
ABCA1	SLK	0.006705	2.45e-14
ABCA1	SLMAP	0.001176	4.455e-09
ABCA1	SMAD1	0.007826	2.229e-09
ABCA1	SMAD4	0.0009835	6.034e-15
ABCA1	SMAD5	0.002116	9.47e-16
ABCA1	SMARCAD1	0.003549	1.863e-08
ABCA1	SMEK2	0.0006374	5.687e-06
ABCA1	SNIP1	7.204e-06	3.269e-09
ABCA1	SNTB2	1.819e-05	3.189e-12
ABCA1	SNX2	0.0008683	2.476e-15
ABCA1	SOCS5	0.0003795	8.541e-10
ABCA1	SOCS6	9.43e-06	4.604e-10
ABCA1	SOX6	0.0003718	4.426e-06
ABCA1	SP1	0.0005912	5.553e-17
ABCA1	SP2	0.005041	1.293e-10
ABCA1	SPIRE1	0.0008255	1.023e-07
ABCA1	SPOPL	0.0002092	6.529e-09
ABCA1	SPRED1	0.0002369	5.894e-18
ABCA1	SPTY2D1	0.003789	4.187e-11
ABCA1	SRGAP1	0.007679	1.123e-06
ABCA1	SRPX	0.0004898	1.43e-07
ABCA1	ST18	0.001941	6.137e-16
ABCA1	ST6GALNAC3	0.005753	6.466e-07
ABCA1	STAG1	0.00937	1.858e-17
ABCA1	STX12	0.004336	7.211e-14
ABCA1	STX7	0.0009611	9.596e-10
ABCA1	STYX	0.00148	4.046e-09
ABCA1	SULF1	3.885e-05	1.024e-07
ABCA1	SUN1	0.006329	5.392e-07
ABCA1	SUV420H1	0.001678	2.148e-09
ABCA1	SUZ12	0.006819	7.494e-10
ABCA1	SYDE1	0.0002963	7.594e-07
ABCA1	SYNCRIP	0.0001048	5.436e-18
ABCA1	TAB3	0.0001374	7.388e-10
ABCA1	TAGAP	0.001113	8.858e-10
ABCA1	TAL1	0.0003538	3.447e-07
ABCA1	TANC2	0.0003468	8.181e-07
ABCA1	TARDBP	0.0005643	1.295e-07
ABCA1	TBC1D15	0.001356	1.041e-09
ABCA1	TBL1X	0.001704	1.185e-07
ABCA1	TBL1XR1	0.007312	5.365e-17
ABCA1	TCF4	0.0005022	9.571e-17
ABCA1	TCF7L2	0.001433	3.764e-06
ABCA1	TEAD1	0.0005724	2.578e-17
ABCA1	TET2	8.28e-05	1.125e-15
ABCA1	TET3	0.0001797	3.257e-11
ABCA1	TGFB2	0.0003349	2.768e-09
ABCA1	TGFBR1	0.003036	1.519e-14
ABCA1	TGFBR2	6.124e-05	4.057e-16
ABCA1	TGFBR3	0.002444	2.669e-06
ABCA1	TIAM1	0.0009805	6.087e-08
ABCA1	TIMP2	0.0002047	7.941e-12
ABCA1	TMCC1	5.806e-05	6.437e-06
ABCA1	TMEM123	0.0002272	5.233e-06
ABCA1	TMEM170B	2.548e-06	1.554e-08
ABCA1	TMEM236	0.006481	1.38e-08
ABCA1	TNFRSF21	0.0001853	1.315e-07
ABCA1	TNKS2	4.702e-07	6.743e-12
ABCA1	TNRC6A	0.002173	6.514e-10
ABCA1	TRAM1	0.007428	3.607e-12
ABCA1	TRIM37	0.008956	7.058e-06
ABCA1	TRIM44	0.005796	3.748e-08
ABCA1	TRIP11	0.0003026	3.682e-10
ABCA1	TRPS1	5.885e-05	3.385e-06
ABCA1	TSC22D2	0.001193	6.109e-09
ABCA1	TSHZ2	0.007404	6.55e-19
ABCA1	TTC28	0.008765	1.984e-06
ABCA1	TTC9	0.006329	6.984e-07
ABCA1	UBE2D1	0.0005017	7.632e-12
ABCA1	UBE2D3	0.0005801	8.452e-06
ABCA1	UBE2W	5.685e-06	2.826e-18
ABCA1	UBR1	0.008942	1.911e-12
ABCA1	ULK2	0.006329	5.988e-08
ABCA1	UNKL	0.004788	6.047e-06
ABCA1	USP25	4.285e-05	3.268e-10
ABCA1	USP32	0.0001577	7.741e-12
ABCA1	USP34	0.00412	1.226e-08
ABCA1	USP46	2.679e-07	3.694e-11
ABCA1	USP53	0.001428	6.116e-07
ABCA1	USP9X	0.001027	2.495e-18
ABCA1	VEZF1	0.0008918	3.249e-10
ABCA1	VPS26A	0.007596	4.221e-10
ABCA1	WDFY3	0.006832	1.79e-12
ABCA1	WDR20	7.427e-05	1.67e-08
ABCA1	WDR47	0.00157	1.443e-16
ABCA1	WDR7	0.000155	1.33e-08
ABCA1	WEE1	4.778e-07	1.035e-06
ABCA1	WNK1	9.726e-06	2.189e-11
ABCA1	WNK3	0.0001328	3.843e-15
ABCA1	WNT1	0.005847	2.199e-06
ABCA1	XRN2	0.009321	1.978e-10
ABCA1	YPEL2	3.739e-05	8.644e-07
ABCA1	YTHDF3	0.001389	1.899e-16
ABCA1	ZBTB44	0.0002355	6.11e-07
ABCA1	ZBTB5	0.0002549	2.438e-08
ABCA1	ZBTB6	4.495e-05	2.344e-08
ABCA1	ZC3H12C	2.253e-08	1.004e-15
ABCA1	ZCCHC14	0.004599	1.063e-13
ABCA1	ZCCHC24	0.0004237	3.29e-12
ABCA1	ZDHHC2	0.003823	9.86e-10
ABCA1	ZDHHC9	0.003162	8.683e-06
ABCA1	ZEB1	0.005255	9.477e-15
ABCA1	ZFHX4	0.0001532	6.961e-12
ABCA1	ZFP91	1.066e-06	1.016e-13
ABCA1	ZFPM2	4.49e-07	1.27e-10
ABCA1	ZFYVE26	2.163e-06	4.546e-13
ABCA1	ZHX1	0.0009955	3.028e-06
ABCA1	ZNF148	0.0009848	1.463e-10
ABCA1	ZNF217	1.149e-06	2.553e-07
ABCA1	ZNF236	1.14e-05	1.32e-12
ABCA1	ZNF292	0.003753	7.003e-10
ABCA1	ZNF326	0.007681	7.604e-06
ABCA1	ZNF503	0.000572	7.27e-11
ABCA1	ZNF532	1.04e-05	2.138e-12
ABCA1	ZNF697	0.007679	5.775e-10
ABCA1	ZNF704	0.00381	3.804e-12
ABCA1	ZNF800	3.19e-05	2.699e-14
ABCA1	ZNFX1	2.925e-06	6.947e-12
ABCA12	SOCS5	0.0001919	4.851e-06
ABCA2	ZNF318	0.006006	3.459e-08
ABCB10	NEK7	0.002811	6.889e-12
ABCB10	SGMS1	0.003456	8.61e-07
ABCB5	ACVR1C	0.009713	1.796e-07
ABCB5	BMP3	0.00297	3.532e-06
ABCB5	C8orf4	0.001001	9.912e-06
ABCB5	CLMP	0.0002357	5.609e-07
ABCB5	DKK1	0.008813	5.479e-06
ABCB5	EDN1	0.005157	5.727e-06
ABCB5	FAM81A	0.00297	8.095e-06
ABCB5	HOXA3	0.007799	5.052e-07
ABCB5	MOB3B	0.0009097	9.734e-06
ABCB5	NPTX1	0.001374	9.174e-07
ABCB5	PLCL2	0.00281	9.315e-08
ABCB5	SCN9A	0.003295	9.889e-07
ABCB5	SIM1	0.004537	8.517e-07
ABCB5	TIMP2	0.005159	1.817e-06
ABCB5	TMOD1	0.006221	8.152e-06
ABCB6	ZNF346	1.161e-06	6.146e-06
ABCB7	CLCN3	0.003118	1.87e-06
ABCB7	DHX15	0.0005591	2.64e-07
ABCB7	ETNK1	0.0008866	2.403e-07
ABCB7	IPO8	0.007251	4.753e-07
ABCB7	PHAX	0.0002862	5.492e-07
ABCB7	PIK3C2A	0.00343	9.292e-07
ABCB7	SNX2	0.0003189	2.911e-06
ABCB7	STX12	7.795e-05	6.979e-07
ABCC10	ANKRA2	1.129e-05	5.299e-07
ABCC10	ARID3B	7.368e-06	1.943e-09
ABCC10	ATAD2B	0.002778	2.962e-06
ABCC10	BTBD9	0.009786	9.826e-06
ABCC10	BTF3L4	0.0004877	7.01e-06
ABCC10	C11orf84	5.767e-07	5.874e-06
ABCC10	C15orf29	0.0003573	3.894e-06
ABCC10	C6orf211	1.161e-08	8.645e-06
ABCC10	CHRD	5.616e-05	6.873e-06
ABCC10	CNOT2	0.004701	2.128e-06
ABCC10	DCAF15	1.244e-07	1.713e-06
ABCC10	DDX19A	2.034e-10	1.808e-10
ABCC10	DICER1	0.006336	7.702e-08
ABCC10	DOT1L	0.0009414	3.404e-07
ABCC10	EEA1	0.002376	3.224e-07
ABCC10	EIF2C3	0.0008984	1.51e-07
ABCC10	EIF4G2	0.001624	6.107e-06
ABCC10	FAF1	1.262e-05	2.526e-07
ABCC10	FAM135A	0.00522	2.936e-06
ABCC10	FBXO30	5.935e-07	3.584e-08
ABCC10	FGD6	0.002443	8.691e-07
ABCC10	FNDC3A	0.0008902	1.853e-07
ABCC10	GALC	6.977e-09	2.647e-08
ABCC10	GGA3	5.781e-06	7.066e-09
ABCC10	GJC1	0.007808	9.186e-06
ABCC10	GOPC	0.0001458	7.541e-06
ABCC10	GTF2I	2.392e-05	2.687e-06
ABCC10	INTS2	0.007029	5.515e-06
ABCC10	ITGB8	8.751e-05	6.999e-06
ABCC10	KIAA1033	7.807e-05	3.29e-06
ABCC10	KIAA1274	4.931e-09	1.441e-06
ABCC10	LRIG1	0.003625	5.952e-07
ABCC10	LRIG2	5.553e-08	9.284e-06
ABCC10	MDFI	5.781e-06	2.087e-08
ABCC10	MEX3A	0.001073	1.446e-06
ABCC10	MIB1	1.132e-06	6.065e-07
ABCC10	MLLT10	0.0001507	6.842e-06
ABCC10	MYO1F	2.193e-09	5.913e-08
ABCC10	NCK2	0.0006931	3.618e-06
ABCC10	NEK9	0.009234	6.212e-06
ABCC10	NNT	6.288e-05	1.611e-06
ABCC10	NPHP3	6.977e-09	5.615e-06
ABCC10	PARM1	3.992e-07	3.205e-07
ABCC10	PARP8	0.004389	2.494e-06
ABCC10	PBX2	0.0002942	9.537e-13
ABCC10	PHACTR2	0.007016	8.452e-06
ABCC10	PTAFR	3.282e-09	6.514e-07
ABCC10	RGS16	0.0002198	2.552e-06
ABCC10	RNF170	9.877e-09	6.692e-06
ABCC10	RNF20	0.0001095	5.952e-06
ABCC10	RUFY3	0.0001575	2.967e-08
ABCC10	RUNX1T1	0.00996	1.857e-06
ABCC10	S100A8	1.249e-07	3.202e-06
ABCC10	SEMA4C	0.001498	1.185e-09
ABCC10	SLC29A3	0.0001782	8.838e-06
ABCC10	STXBP5	2.198e-06	1.798e-06
ABCC10	TEAD3	0.0002699	5.462e-07
ABCC10	TET2	0.007278	1.914e-08
ABCC10	THOC2	0.003482	2.29e-06
ABCC10	TIA1	0.0006792	3.414e-09
ABCC10	TMEM65	1.822e-06	6.174e-06
ABCC10	ZBTB39	0.0001178	3.742e-08
ABCC10	ZNF318	2.045e-06	1.075e-13
ABCC10	ZNF512B	1.082e-06	1.251e-06
ABCC10	ZNF689	7.131e-08	9.519e-06
ABCC10	ZNF710	5.262e-06	7.647e-07
ABCC10	ZSWIM4	0.009205	3.386e-06
ABCC12	CXCL5	0.004513	3.872e-06
ABCC4	CBFB	0.003104	6.564e-07
ABCC4	CEP112	0.0005231	1.483e-09
ABCC4	CNN3	0.003603	6.482e-06
ABCC4	FAM65B	0.003131	9.111e-07
ABCC4	HOXA13	0.005545	1.622e-06
ABCC4	LIPA	0.007454	9.489e-07
ABCC4	MARK1	0.009611	2.829e-07
ABCC4	NPL	0.005574	4.667e-06
ABCC4	NR5A2	0.004302	1.332e-08
ABCC4	PRKD1	0.001321	7.383e-13
ABCC4	RPIA	0.004357	4.31e-07
ABCC4	SMAD9	0.002772	3.691e-06
ABCC4	STAC	0.003131	1.581e-09
ABCC4	TFPI	0.009676	6.407e-06
ABCC4	WIPF2	0.001122	4.649e-06
ABCC5	ACSL4	0.005161	1.073e-06
ABCC5	ACTL6A	0.00905	2.408e-06
ABCC5	AMMECR1L	0.003354	7.666e-10
ABCC5	ANKRA2	0.005342	6.076e-06
ABCC5	ANKRD50	0.001214	2.409e-06
ABCC5	ANKRD52	0.006552	6.648e-06
ABCC5	ARL5A	0.007882	1.834e-06
ABCC5	ASAP1	0.001353	5.951e-10
ABCC5	ATAD2B	1.008e-06	2.985e-08
ABCC5	ATP13A3	0.00542	9.609e-09
ABCC5	BCL2L1	0.007882	4.135e-09
ABCC5	BCL7A	0.00419	9.563e-08
ABCC5	BRWD1	0.002424	3.018e-09
ABCC5	BRWD3	0.0004515	4.583e-11
ABCC5	CAPRIN2	0.001428	2.969e-07
ABCC5	CDYL	0.001143	2.773e-08
ABCC5	CELF1	0.001589	7.338e-10
ABCC5	CEP120	7.059e-08	2.672e-14
ABCC5	CHSY3	0.007786	2.496e-06
ABCC5	CNOT4	0.008178	7.562e-10
ABCC5	CNOT6L	4.252e-05	7.8e-06
ABCC5	CPEB2	0.001467	1.489e-07
ABCC5	CPEB3	7.375e-06	7.108e-07
ABCC5	CPEB4	0.006086	2.048e-06
ABCC5	DAPK1	1.87e-06	4.201e-07
ABCC5	DICER1	0.00988	7.615e-12
ABCC5	DLC1	3.107e-05	2.519e-10
ABCC5	DMD	1.546e-05	5.151e-09
ABCC5	DR1	0.00699	3.602e-06
ABCC5	DUSP7	0.008711	2.672e-07
ABCC5	DVL3	0.009111	2.757e-07
ABCC5	E2F5	0.004006	5.075e-06
ABCC5	ERCC4	0.009909	3.932e-07
ABCC5	ERGIC1	0.006878	3.386e-07
ABCC5	ERLIN1	0.008783	1.111e-08
ABCC5	ETNK1	0.001994	5.165e-09
ABCC5	FAM178A	1.271e-07	1.065e-09
ABCC5	FAM49B	0.0001569	1.547e-06
ABCC5	FNDC3B	0.00274	5.845e-06
ABCC5	FNIP1	0.002428	3.105e-07
ABCC5	FOXP1	0.0008156	4.975e-07
ABCC5	GCNT4	5.383e-05	3.97e-06
ABCC5	GOLT1B	0.0006536	4.617e-08
ABCC5	GOPC	0.0001671	6.93e-06
ABCC5	HAND2	0.005657	2.699e-07
ABCC5	HAS2	0.005417	1.103e-08
ABCC5	HCFC2	0.0003118	1.387e-09
ABCC5	HOXA1	0.006962	5.086e-07
ABCC5	IGF1	0.002253	2.007e-07
ABCC5	IPO11	0.008783	1.179e-06
ABCC5	LCOR	0.0005212	1.935e-13
ABCC5	LEPROTL1	4.917e-05	8.409e-06
ABCC5	LMLN	0.003445	2.317e-09
ABCC5	LOXL4	0.001671	8.095e-08
ABCC5	LRIG1	0.00621	3.576e-06
ABCC5	LRIG2	0.001747	1.864e-07
ABCC5	MAP3K1	0.002561	4.268e-07
ABCC5	MKL2	0.001994	1.957e-13
ABCC5	MLL2	0.001513	7.395e-06
ABCC5	MOB4	0.0004547	3.428e-09
ABCC5	MTMR12	1.155e-07	7.819e-10
ABCC5	NAA30	1.359e-06	4.344e-14
ABCC5	NAA50	0.006421	8.342e-09
ABCC5	NCOA1	0.008425	5.766e-06
ABCC5	NXPH1	0.002315	9.803e-07
ABCC5	PAX6	0.0009732	3.141e-06
ABCC5	PCDH19	0.0035	7.9e-08
ABCC5	PCGF3	0.00238	5.558e-07
ABCC5	PLCB1	0.00595	2.335e-07
ABCC5	POGZ	0.001368	4.689e-11
ABCC5	POU2F1	0.007319	6.619e-06
ABCC5	PTP4A2	0.001709	9.062e-06
ABCC5	RASA1	0.0002704	3.265e-12
ABCC5	ROCK1	0.002764	1.886e-08
ABCC5	RUFY2	0.003834	1.1e-06
ABCC5	SECISBP2L	0.008121	1.623e-06
ABCC5	SEMA4C	0.002418	1.338e-07
ABCC5	SEMA4F	0.00055	1.037e-08
ABCC5	SENP2	0.003252	1.483e-11
ABCC5	SLC29A3	0.005566	5.579e-06
ABCC5	SLC38A2	0.001754	8.767e-08
ABCC5	SLC38A9	3.611e-05	2.531e-06
ABCC5	SLC4A7	0.0008624	3.21e-08
ABCC5	SOCS4	0.001245	6.454e-08
ABCC5	SOX4	5.007e-05	3.284e-09
ABCC5	SPIRE1	0.0005584	5.861e-08
ABCC5	SPOPL	0.00895	6.609e-12
ABCC5	STARD3NL	0.0005835	5.332e-06
ABCC5	TARBP2	0.001944	4.864e-06
ABCC5	TBC1D9	0.009902	2.712e-08
ABCC5	THBS1	0.001021	3.155e-09
ABCC5	TMEM41A	0.0004191	3.277e-07
ABCC5	TMEM91	0.006846	4.417e-06
ABCC5	TNPO1	0.006601	1.259e-09
ABCC5	TRAK2	0.002468	6.105e-06
ABCC5	TSC1	0.0001152	6.909e-08
ABCC5	UBAP2L	0.007323	7.325e-06
ABCC5	UHRF2	0.001249	5.752e-09
ABCC5	USP24	0.0009474	1.083e-08
ABCC5	USP38	0.0002702	2.939e-09
ABCC5	USP46	0.003395	8.664e-06
ABCC5	VCPIP1	0.006986	6.134e-08
ABCC5	YTHDF3	0.002685	1.246e-08
ABCC5	ZCCHC8	0.009801	1.038e-08
ABCC5	ZFYVE16	0.001853	1.664e-08
ABCC5	ZNF641	0.001082	7.623e-06
ABCC5	ZNF644	0.00506	8.394e-07
ABCC5	ZNF689	0.003064	2.315e-07
ABCC9	SCN9A	0.003032	4.677e-09
ABCD3	APC	0.009743	4.414e-17
ABCD3	CAND1	0.006142	1.063e-16
ABCD3	CS	0.003093	7.788e-14
ABCD3	DCP2	0.009511	2.218e-11
ABCD3	DENND4C	0.004252	3.329e-10
ABCD3	ELK3	0.007565	1.689e-07
ABCD3	HOMER1	0.002328	1.33e-08
ABCD3	KIF3A	0.003372	4.274e-06
ABCD3	LARS	0.002571	4.712e-07
ABCD3	MLLT6	0.001851	3.329e-06
ABCD3	OPA1	0.003888	1.617e-10
ABCD3	SEC22A	0.0007244	1.171e-06
ABCD3	SLC30A5	0.007815	1.616e-11
ABCD3	UBR1	0.001259	5.539e-14
ABCD3	ZNF238	0.009195	1.928e-07
ABCE1	ACTR3	0.005177	7.785e-09
ABCE1	AMMECR1	0.0004921	2.334e-09
ABCE1	CAND1	0.007392	1.166e-16
ABCE1	CCNA2	0.0001055	3.718e-12
ABCE1	CREBBP	0.002211	1.602e-11
ABCE1	CSRNP2	0.002492	4.69e-06
ABCE1	DAG1	0.008487	4.109e-07
ABCE1	DCUN1D4	0.002416	4.436e-18
ABCE1	DENND4C	0.005003	6.406e-08
ABCE1	DOPEY1	8.554e-05	3.566e-06
ABCE1	FAM136A	0.00139	9.506e-06
ABCE1	FBXO28	0.0009063	6.92e-06
ABCE1	FEM1B	0.001593	5.397e-06
ABCE1	GSK3B	0.004581	1.765e-10
ABCE1	HEATR5A	0.003055	1.477e-08
ABCE1	HMGCR	0.001935	1.79e-06
ABCE1	HOMER1	0.007315	2.068e-07
ABCE1	IL1RAP	0.001913	2.541e-08
ABCE1	ITGA6	0.0007742	4.381e-07
ABCE1	KCTD20	0.003885	4.245e-07
ABCE1	KIAA0947	0.001334	2.614e-14
ABCE1	KIF11	0.001158	6.526e-07
ABCE1	KIF21A	0.0005473	7.535e-06
ABCE1	LARP4B	0.004836	1.233e-06
ABCE1	LIN54	0.002657	1.479e-16
ABCE1	MARCH1	0.006456	1.89e-06
ABCE1	METAP2	0.0004362	1.662e-12
ABCE1	MIER3	0.001965	3.273e-13
ABCE1	MORF4L1	0.001298	1.093e-13
ABCE1	NCOA4	0.006672	9.031e-06
ABCE1	NKRF	1.978e-05	1.054e-15
ABCE1	NOLC1	0.003894	1.18e-09
ABCE1	NUCKS1	0.0003144	1.473e-07
ABCE1	NUFIP2	0.007315	2.545e-20
ABCE1	OTUD4	0.001574	3.516e-20
ABCE1	PDHX	1.957e-06	1.287e-07
ABCE1	PDS5B	0.00558	5.004e-09
ABCE1	PPM1B	0.008425	3.258e-13
ABCE1	PTBP3	0.002403	3.301e-15
ABCE1	RAP1GDS1	0.002391	6.777e-10
ABCE1	RAPGEF6	0.0006707	3.815e-13
ABCE1	RCOR1	0.0009557	5.833e-09
ABCE1	REV3L	0.001257	2.543e-10
ABCE1	RICTOR	0.004787	1.127e-12
ABCE1	RNF138	4.058e-06	1.275e-15
ABCE1	SCAI	0.0003619	2.852e-12
ABCE1	SETDB2	0.0007052	1.135e-06
ABCE1	SLK	0.001185	1.168e-10
ABCE1	SMEK2	0.004632	2.373e-12
ABCE1	SNRK	0.001726	4.509e-07
ABCE1	SPAST	0.0008085	1.588e-12
ABCE1	SRSF11	1.876e-05	6.552e-10
ABCE1	TET3	0.005114	2.448e-12
ABCE1	TMTC3	0.006558	4.508e-06
ABCE1	TNRC6A	0.006608	2.519e-10
ABCE1	UBTD2	0.0009594	4.292e-11
ABCE1	UBTF	0.003483	1.067e-09
ABCE1	YTHDF3	9.817e-06	8.348e-22
ABCE1	ZBTB1	0.002474	1.68e-08
ABCE1	ZBTB10	0.008281	3.069e-12
ABCE1	ZNF718	0.0009212	1.337e-06
ABCF2	ARMC1	0.0009952	1.553e-08
ABCF2	ATXN2	0.000255	3.977e-06
ABCF2	BAG4	0.0005528	3.07e-07
ABCF2	CDC37L1	0.003367	2.471e-07
ABCF2	EPHA1	0.0001641	6.569e-07
ABCF2	GPN1	0.0001502	1.292e-07
ABCF2	HDGF	0.002587	1.562e-06
ABCF2	HIATL1	0.002517	7.204e-07
ABCF2	KLHL18	0.004169	5.188e-07
ABCF2	LENG8	0.007754	7.56e-06
ABCF2	NBR1	0.005152	5.553e-06
ABCF2	PAPD4	0.0008338	5.394e-08
ABCF2	PAQR3	4.228e-05	3.4e-06
ABCF2	PDAP1	0.00693	5.196e-10
ABCF2	PDCD11	3.187e-05	8.151e-10
ABCF2	PDIK1L	0.0003851	1.909e-07
ABCF2	PI4KB	0.0004313	6.677e-06
ABCF2	PLEKHA1	0.001183	3.71e-07
ABCF2	SLITRK6	0.001735	1.598e-06
ABCF2	SOCS5	0.008255	5.665e-07
ABCF2	SOS1	0.0006412	1.711e-07
ABCF2	SYNRG	0.0001502	9.764e-06
ABCF2	VTI1A	0.004554	6.359e-07
ABCF2	ZNF326	0.008472	8.55e-07
ABCF2	ZNF622	7.763e-05	4.582e-06
ABCF3	ATXN7L3	0.003143	3.459e-06
ABCF3	C17orf59	0.0002332	2.2e-06
ABCF3	EIF2B5	6.075e-07	4.567e-11
ABCF3	IRF2BPL	0.004009	4.065e-06
ABCF3	LRRC57	0.00018	6.531e-07
ABCF3	MARCH9	3.74e-05	1.206e-06
ABCF3	MNT	0.003737	2.834e-07
ABCF3	NFE2L1	1.417e-05	6.697e-06
ABCF3	PDAP1	2.735e-06	6.278e-06
ABCF3	PEX5	2.426e-05	4.855e-06
ABCF3	PNPLA6	2.101e-06	3.352e-06
ABCF3	PUF60	4.932e-06	1.813e-08
ABCF3	RANBP3	0.0003488	1.469e-07
ABCF3	RIC8A	6.405e-06	6.424e-06
ABCF3	SMYD5	4.718e-05	7.623e-06
ABCF3	SPEN	0.004875	6.622e-06
ABCF3	USP19	2.059e-05	5.554e-07
ABCG2	ACBD5	0.002093	7.247e-07
ABCG2	ARHGEF18	0.0005417	5.974e-06
ABCG2	B3GALT2	0.001013	4.69e-06
ABCG2	BAGE	0.0009844	2.526e-06
ABCG2	BAMBI	0.003677	1.129e-06
ABCG2	BNC2	0.007119	4.494e-06
ABCG2	CC2D1A	0.0002094	7.224e-08
ABCG2	CD69	0.003301	5.165e-07
ABCG2	CHRM2	0.0005417	2.847e-06
ABCG2	CLIP4	0.007962	4.919e-07
ABCG2	CTSA	0.001324	2.573e-06
ABCG2	DPF3	0.0004623	5.188e-08
ABCG2	ERO1LB	0.002157	5.496e-06
ABCG2	FASTK	2.786e-05	3.934e-06
ABCG2	FGF4	0.0001275	9.942e-06
ABCG2	GRAMD1A	0.0003073	8.953e-07
ABCG2	GRHL2	0.004818	1.574e-07
ABCG2	GUCY1A3	0.001324	5.489e-08
ABCG2	HSPA8	0.008395	1.866e-07
ABCG2	IGF2BP1	0.007545	2.947e-07
ABCG2	ISM2	0.003643	2.089e-07
ABCG2	ITFG1	0.0001373	2.344e-07
ABCG2	KLHL2	0.0005487	1.74e-07
ABCG2	LIMK1	4.984e-05	6.123e-07
ABCG2	LRP4	0.0005816	3.871e-08
ABCG2	MAP3K8	0.003677	9.229e-06
ABCG2	MARCH11	0.007322	2.773e-06
ABCG2	MARS	0.001051	8.377e-08
ABCG2	MXI1	0.006427	1.698e-09
ABCG2	NAA16	0.006023	7.523e-07
ABCG2	NAGK	0.0004199	3.499e-06
ABCG2	NPAS2	0.007012	8.984e-07
ABCG2	NRSN1	0.0001588	4.759e-07
ABCG2	OXR1	0.00665	2.36e-06
ABCG2	PKD2	0.0001588	3.844e-07
ABCG2	PRDM14	0.004302	1.122e-06
ABCG2	RASL11B	0.0001373	3.791e-06
ABCG2	RGL1	0.009316	1.198e-06
ABCG2	RGMA	0.006758	1.645e-06
ABCG2	SLC2A4	0.001008	4.246e-07
ABCG2	TBC1D9	0.002335	6.074e-07
ABCG2	TBL1X	0.001788	3.869e-06
ABCG2	TMEM100	0.006385	3.448e-10
ABCG2	TMEM133	1.663e-05	6.505e-06
ABCG2	TRIP10	0.006235	7.122e-06
ABCG2	USP31	0.0002379	9.34e-06
ABCG2	USP34	0.003436	2.319e-06
ABCG2	USP53	7.944e-05	3.365e-07
ABCG2	YPEL4	0.002252	5.627e-07
ABCG2	ZBTB33	0.007962	1.557e-07
ABCG2	ZDHHC9	0.003442	2.587e-06
ABCG2	ZNF202	0.002103	2.416e-06
ABCG4	BNC2	0.003052	1.049e-06
ABCG4	CALD1	0.00112	6.58e-09
ABCG4	CPNE2	0.004964	4.653e-06
ABCG4	DDX26B	0.0006824	7.819e-06
ABCG4	FIBIN	0.001368	1.266e-06
ABCG4	HAS2	1.842e-07	7.775e-08
ABCG4	HOXC8	0.004473	6.681e-09
ABCG4	LRP4	3.209e-05	8.544e-08
ABCG4	PRDM6	8.967e-05	2.577e-06
ABCG4	PTPN21	0.007313	6.623e-06
ABCG4	RECK	9.314e-05	9.813e-06
ABCG4	SKI	3.162e-06	8.089e-07
ABCG4	SOBP	0.0003994	1.746e-06
ABCG4	SYDE1	2.372e-06	1.845e-08
ABCG4	TGFB1I1	6.771e-06	4.222e-09
ABCG4	ZFPM2	0.0005325	2.23e-08
ABCG4	ZNF532	0.0001298	7.209e-07
ABHD13	ACAP2	0.002859	2.45e-14
ABHD13	ACTR2	0.008206	1.288e-12
ABHD13	ACTR3	0.001001	3.492e-10
ABHD13	ADAM10	0.005077	6.492e-11
ABHD13	AFF4	0.006787	2.965e-13
ABHD13	AGGF1	0.001816	5.087e-11
ABHD13	AHCYL1	0.0001233	3.427e-06
ABHD13	ANKIB1	0.008321	9.338e-18
ABHD13	ANKRD13C	0.001582	3.196e-15
ABHD13	ANKRD28	0.002296	1.375e-13
ABHD13	ANKRD44	0.004555	5.441e-11
ABHD13	ARID5B	0.00109	2.251e-15
ABHD13	ARMC1	0.006776	6.907e-09
ABHD13	ASPN	2.669e-05	6.826e-07
ABHD13	ATP2A2	0.001958	9.895e-14
ABHD13	ATP8A1	0.007055	1.032e-07
ABHD13	ATP8B1	0.004517	7.995e-06
ABHD13	AZIN1	0.0008525	3.383e-14
ABHD13	BAI3	0.002585	5.075e-10
ABHD13	BRMS1L	0.0002708	6.27e-15
ABHD13	C21orf91	0.002256	4.455e-08
ABHD13	C5orf43	0.008393	1.89e-08
ABHD13	C6orf62	0.003094	5.584e-12
ABHD13	CAND1	0.0006516	1.124e-12
ABHD13	CCND2	0.0002748	3.082e-08
ABHD13	CDC42	0.006352	1.011e-09
ABHD13	CDK13	0.00379	4.958e-09
ABHD13	CEP350	0.003857	1.501e-19
ABHD13	CHCHD10	0.006381	7.989e-06
ABHD13	CHMP7	0.001045	4.51e-07
ABHD13	CHSY3	0.005154	7.413e-09
ABHD13	CLDN11	0.004935	1.011e-07
ABHD13	CNKSR2	0.0002386	9.453e-13
ABHD13	CPEB1	0.003452	2.531e-07
ABHD13	CPEB3	0.000546	2.766e-12
ABHD13	DCP1A	0.009947	1.873e-11
ABHD13	DDX3X	0.0004406	1.224e-19
ABHD13	DMXL1	0.0007428	1.784e-11
ABHD13	E2F3	0.001202	2.219e-11
ABHD13	EEA1	0.003064	8.968e-15
ABHD13	ELAVL2	0.001688	9.404e-08
ABHD13	ESRRG	0.001876	1.069e-11
ABHD13	FAM126B	0.002419	3.266e-13
ABHD13	FAM133B	0.009837	4.41e-09
ABHD13	FBXL17	0.007698	2.647e-10
ABHD13	FNBP4	0.007791	5.032e-07
ABHD13	FNIP1	0.000712	1.165e-15
ABHD13	FOXN3	0.001144	9.63e-09
ABHD13	FRS2	0.0001033	2.607e-10
ABHD13	FRYL	0.006232	1.046e-09
ABHD13	GNPDA2	8.443e-05	1.394e-07
ABHD13	GPM6B	0.0006312	5.886e-12
ABHD13	GPR137C	0.003454	4.831e-06
ABHD13	HERC3	0.008221	2.095e-08
ABHD13	HIPK1	0.0003247	2.005e-19
ABHD13	HLTF	0.002256	3.303e-06
ABHD13	HNRNPK	0.009441	7.874e-11
ABHD13	IBTK	0.000668	8.39e-06
ABHD13	IGF2BP3	0.001436	6.168e-08
ABHD13	ITPR1	0.0003335	5.789e-08
ABHD13	JAZF1	5.663e-05	4.976e-14
ABHD13	JMY	0.005478	7.562e-17
ABHD13	KAT6B	3.887e-05	1.328e-11
ABHD13	KCNA1	0.001709	6.817e-08
ABHD13	KIAA1109	0.009316	1.146e-10
ABHD13	KLF5	0.001217	6.952e-11
ABHD13	LCOR	0.004846	5.578e-24
ABHD13	LHFPL2	0.004749	6.925e-08
ABHD13	LRP12	0.0005315	3.846e-09
ABHD13	LRRC1	1.321e-05	6.191e-09
ABHD13	LRRC4	0.0007428	4.558e-06
ABHD13	LUZP1	0.003998	1.163e-12
ABHD13	LUZP6	0.003903	1.269e-11
ABHD13	MAGEL2	0.002349	8.252e-06
ABHD13	MAST4	0.004178	6.24e-12
ABHD13	MBTD1	0.004192	1.157e-14
ABHD13	MED1	0.004716	1.375e-07
ABHD13	MEF2A	0.0003543	2.793e-12
ABHD13	MET	0.00401	7.065e-07
ABHD13	MLL5	0.003964	1.823e-18
ABHD13	MMP16	0.001762	2.315e-11
ABHD13	MTDH	0.001217	2.281e-07
ABHD13	MTMR12	0.0005641	3.208e-15
ABHD13	MYO16	0.00128	9.155e-06
ABHD13	NCOA1	0.0001965	2.503e-10
ABHD13	NEGR1	0.009083	2.377e-07
ABHD13	NPC1	0.006312	9.031e-08
ABHD13	NR3C1	0.009422	4.959e-13
ABHD13	NR4A3	2.042e-06	7.762e-06
ABHD13	NUFIP2	0.005745	3.369e-15
ABHD13	OTUD4	0.006796	1.103e-15
ABHD13	OXSR1	0.007769	7.647e-13
ABHD13	PAPD5	0.003959	1.387e-08
ABHD13	PAXIP1	0.006206	3.268e-07
ABHD13	PCDH10	0.0008702	4.038e-07
ABHD13	PCDH18	0.003942	1.14e-06
ABHD13	PCMTD1	0.0002646	3.179e-07
ABHD13	PDE10A	0.009954	2.067e-09
ABHD13	PDE8A	0.0006227	3.837e-07
ABHD13	PDS5A	0.002157	2.13e-10
ABHD13	PHF3	0.007848	1.781e-11
ABHD13	PHIP	0.008314	2.595e-17
ABHD13	PKN2	0.001335	1.181e-19
ABHD13	PPM1B	0.006934	5.023e-15
ABHD13	PPP1R12A	0.001582	1.529e-17
ABHD13	PPP3R1	0.005988	1.069e-16
ABHD13	PRKAR1A	0.005416	2.216e-11
ABHD13	PTPN14	0.008507	9.621e-09
ABHD13	PTPRK	0.007698	4.51e-06
ABHD13	PUM2	0.003964	8.378e-18
ABHD13	RAB23	0.0004369	2.43e-07
ABHD13	RAB8B	0.0004856	4.299e-15
ABHD13	RANBP9	0.003113	2.241e-07
ABHD13	RAP1A	0.005993	1.524e-13
ABHD13	RAP2C	0.001017	8.745e-06
ABHD13	RASA1	0.000128	3.258e-20
ABHD13	RBM12	0.002494	2.519e-18
ABHD13	RECK	0.001652	1.235e-07
ABHD13	RNF19A	0.001453	1.47e-09
ABHD13	RNF4	0.001456	2.466e-10
ABHD13	RSBN1	0.0004944	1.335e-15
ABHD13	SDC2	0.0049	2.375e-06
ABHD13	SERTAD2	0.007394	5.146e-09
ABHD13	SLAIN2	0.003199	1.192e-07
ABHD13	SLC12A2	0.00986	5.399e-10
ABHD13	SLC25A36	0.004028	8.001e-16
ABHD13	SNAI2	0.0005245	1.125e-10
ABHD13	SNX13	1.56e-05	6.424e-21
ABHD13	SNX29	0.001474	6.2e-06
ABHD13	SOX11	0.001144	1.658e-06
ABHD13	SRPK2	0.00209	5.793e-09
ABHD13	SYNCRIP	0.0001908	1.373e-13
ABHD13	TEK	0.001751	4.883e-07
ABHD13	TMEM64	0.001607	3.83e-09
ABHD13	TOPORS	0.007628	1.482e-09
ABHD13	TSHZ3	0.004582	5.967e-08
ABHD13	TWF1	0.00401	4.217e-12
ABHD13	UBE2E1	0.0008695	7.504e-10
ABHD13	UBR5	0.006787	1.312e-06
ABHD13	USP9Y	0.0006124	4.566e-06
ABHD13	VEZF1	0.0011	1.918e-15
ABHD13	VPS36	0.006529	2.677e-13
ABHD13	YIPF4	0.0005703	1.127e-16
ABHD13	YTHDF3	0.0002148	4.032e-08
ABHD13	ZEB2	0.000845	6.498e-15
ABHD13	ZFHX4	0.001085	1.462e-12
ABHD13	ZHX1	0.009079	7.491e-09
ABHD13	ZNF148	0.003138	1.503e-17
ABHD13	ZNF449	0.003086	3.228e-11
ABHD13	ZNF532	0.005552	1.693e-08
ABHD2	ANKIB1	0.002112	9.825e-08
ABHD2	ANKRD11	0.00357	3.465e-06
ABHD2	AP4E1	0.006205	2.141e-14
ABHD2	C7orf60	0.002168	1.678e-10
ABHD2	CDC37L1	0.0006792	4.957e-07
ABHD2	CDK8	0.007669	2.005e-06
ABHD2	CELF2	0.006887	9.507e-10
ABHD2	CIT	0.004956	5.368e-08
ABHD2	CREB5	0.002227	3.506e-07
ABHD2	CREM	0.0006636	1.279e-07
ABHD2	DMD	0.004607	6.507e-09
ABHD2	EIF2C1	0.002659	1.654e-11
ABHD2	FAM117B	0.007488	1.27e-07
ABHD2	FCHO2	0.006323	1.721e-13
ABHD2	GJA1	0.0006052	3.06e-10
ABHD2	GNPDA2	0.005009	2.535e-09
ABHD2	HGF	0.008957	3.073e-08
ABHD2	HMGA2	0.005231	1.905e-06
ABHD2	HNRNPU	0.001634	4.71e-15
ABHD2	KLHL15	0.009234	6.516e-13
ABHD2	MAGI3	0.0009343	2.268e-06
ABHD2	MAP3K1	0.003447	9.973e-12
ABHD2	MYEF2	0.009814	1.661e-07
ABHD2	NBEAL1	0.0003926	1.105e-08
ABHD2	NCOA3	3.7e-05	4.52e-10
ABHD2	NIN	0.009814	1.033e-06
ABHD2	NPC1	0.005649	1.278e-10
ABHD2	NRG3	0.0007081	5.217e-06
ABHD2	OTUD1	0.002885	1.094e-06
ABHD2	PKD2	0.002994	3.262e-06
ABHD2	PTPN13	0.005731	2.092e-06
ABHD2	RFX7	0.002721	6.074e-15
ABHD2	RORA	0.000869	4.908e-12
ABHD2	RUNX1	0.00188	1.526e-08
ABHD2	SYBU	0.003801	6.841e-09
ABHD2	TFDP1	0.003835	8.69e-11
ABHD2	TIMP3	0.003446	3.623e-07
ABHD2	TNRC6B	0.007842	8.831e-13
ABHD2	TWF1	0.005521	1.22e-13
ABHD2	VGLL4	0.001516	3.72e-08
ABHD2	WNK3	0.001287	6.216e-10
ABHD2	ZC3H7B	0.0004663	6.372e-07
ABHD2	ZHX2	0.004428	1.117e-09
ABHD2	ZNF148	0.004185	3.605e-14
ABHD3	ARHGAP12	0.006515	5.725e-06
ABHD3	ARID4A	0.0007844	1.384e-06
ABHD3	ARID4B	0.0004646	7.916e-08
ABHD3	ASAP1	0.0009308	3.89e-06
ABHD3	ASH1L	0.0002854	3.448e-08
ABHD3	BRWD1	0.001487	1.848e-06
ABHD3	C2orf69	0.003386	4.591e-06
ABHD3	C5orf24	0.00479	4.654e-07
ABHD3	CALM2	0.009391	4.317e-06
ABHD3	CDK2	1.283e-07	1.563e-06
ABHD3	CGGBP1	0.001733	1.292e-07
ABHD3	CHD9	0.009736	8.333e-06
ABHD3	CIT	7.381e-05	5.625e-06
ABHD3	CPEB3	0.003858	9.198e-07
ABHD3	CPSF6	2.046e-05	5.226e-08
ABHD3	DCUN1D1	3.106e-05	3.854e-13
ABHD3	DERL2	0.009991	7.585e-06
ABHD3	DNAJB14	0.0003247	1.332e-06
ABHD3	FBXL17	0.004523	2.799e-09
ABHD3	FBXO28	0.0008837	9.469e-06
ABHD3	FCHO2	0.005937	1.846e-07
ABHD3	FMR1	0.008041	9.536e-07
ABHD3	FNDC3A	0.006282	3.957e-10
ABHD3	GALNT4	0.0004977	1.566e-07
ABHD3	GCLC	0.009991	9.044e-06
ABHD3	HBP1	0.00744	6.11e-06
ABHD3	HECTD2	5.83e-05	1.682e-06
ABHD3	HIPK3	0.009225	7.594e-07
ABHD3	HNRNPK	0.004543	3.347e-08
ABHD3	IRF2	0.0006762	2.086e-07
ABHD3	KIF13A	3.03e-07	1.171e-06
ABHD3	KLF3	0.004887	2.394e-06
ABHD3	KLHL15	0.0004646	2.13e-06
ABHD3	LYSMD3	8.474e-05	3.02e-08
ABHD3	MBNL1	0.0001896	3.604e-08
ABHD3	MIER1	0.002133	1.102e-07
ABHD3	MIER3	0.0002238	7.607e-10
ABHD3	MLL	0.001368	5.747e-06
ABHD3	MLL3	0.009406	6.646e-07
ABHD3	MTF1	0.001455	2.261e-06
ABHD3	NAA16	0.001293	7.918e-07
ABHD3	NEK9	6.357e-07	1.71e-07
ABHD3	NPAT	0.0001424	5.948e-07
ABHD3	NR2C2	0.0002609	2.809e-06
ABHD3	NR4A2	0.001006	7.566e-06
ABHD3	NUFIP2	0.007357	5.908e-07
ABHD3	OTUD4	0.0007991	1.3e-08
ABHD3	PAPD5	0.0007178	1.273e-07
ABHD3	PAPOLA	0.0003175	1.2e-07
ABHD3	PDIK1L	5.218e-07	1.729e-10
ABHD3	POLK	6.435e-05	5.725e-06
ABHD3	PSEN1	0.001526	4.046e-07
ABHD3	RABEP1	0.001452	9.41e-10
ABHD3	RBL2	0.004629	2.476e-07
ABHD3	RNF38	0.00022	3.631e-07
ABHD3	RSBN1	1.75e-05	3.184e-11
ABHD3	RSBN1L	8.49e-07	1.928e-07
ABHD3	SAR1B	0.003867	9.213e-07
ABHD3	SLC35F5	1.18e-05	7.198e-07
ABHD3	SLC44A1	0.001521	8.908e-09
ABHD3	SPOPL	9.734e-06	3.389e-07
ABHD3	SRSF7	0.004488	1.435e-06
ABHD3	STAG2	0.009425	1.156e-08
ABHD3	SYNJ1	8.152e-05	6.182e-08
ABHD3	TARDBP	0.007887	1.712e-08
ABHD3	TBL1XR1	3.202e-05	8.502e-08
ABHD3	TRAPPC8	0.006365	8.853e-11
ABHD3	UBE2W	0.003492	2.389e-07
ABHD3	UBE3A	0.002498	2.844e-09
ABHD3	WEE1	0.001053	5.316e-07
ABHD3	ZBTB11	0.0004361	2.38e-07
ABHD3	ZNF148	0.0001814	6.222e-07
ABHD3	ZNF236	2.276e-06	1.925e-08
ABHD3	ZNF367	0.006707	1.15e-08
ABHD4	ARID5B	0.0008161	4.509e-07
ABHD4	CASD1	0.002421	9.124e-06
ABHD4	GIT2	0.002437	4.645e-09
ABHD5	ARPP19	0.008029	1.061e-07
ABHD5	GSK3B	9.389e-05	1.73e-11
ABHD5	IL1RAP	0.009408	8.552e-06
ABHD5	KIAA0895	0.000513	7.895e-06
ABHD5	LMLN	0.003454	1.365e-06
ABHD5	LRRC58	0.001039	2.304e-06
ABHD5	MIB1	0.005561	4.494e-07
ABHD5	NCKIPSD	0.002269	5.774e-06
ABHD5	NCOA4	0.007248	2.389e-06
ABHD5	PTBP3	0.005164	3.852e-10
ABHD5	RNF141	0.002527	4.353e-07
ABHD5	RNF19A	0.0002877	2.397e-06
ABHD5	SCAF11	0.005157	8.86e-10
ABHD6	AGGF1	0.003652	1.369e-06
ABI1	ACBD5	0.001718	5.997e-20
ABI1	ACPL2	0.004734	1.964e-07
ABI1	ADAM9	0.001231	2.82e-08
ABI1	AEBP2	0.00121	1.381e-18
ABI1	AFF4	0.0005495	5.517e-21
ABI1	AFTPH	0.005668	7.297e-10
ABI1	AKAP9	4.228e-07	6.179e-15
ABI1	AKT3	0.003553	2.365e-14
ABI1	AKTIP	0.0002952	1.384e-08
ABI1	ALCAM	0.0001195	1.796e-07
ABI1	ALDH1A3	0.0001179	4.049e-08
ABI1	ALX4	5.842e-05	8.051e-06
ABI1	AMBRA1	0.008871	1.34e-08
ABI1	ANKFY1	0.0006021	1.929e-17
ABI1	ANKH	0.009641	6.71e-06
ABI1	ANKIB1	6.249e-06	2.552e-20
ABI1	ANKRA2	0.003319	9.732e-07
ABI1	ANKRD13C	1.939e-07	2.21e-22
ABI1	ANKRD28	0.006909	2.263e-13
ABI1	ANKRD50	6.754e-05	1.175e-15
ABI1	AP1G1	6.251e-06	1.281e-10
ABI1	APPL1	0.009012	2.965e-21
ABI1	ARAP2	0.0008749	1.442e-10
ABI1	ARF6	0.002047	8.655e-11
ABI1	ARHGAP1	9.294e-05	1.422e-06
ABI1	ARHGAP12	0.0002755	1.589e-26
ABI1	ARHGAP35	0.0038	8.208e-07
ABI1	ARHGEF3	0.000612	3.861e-07
ABI1	ARID4B	1.912e-05	1.337e-16
ABI1	ARL4A	0.0001032	5.345e-07
ABI1	ARNT	0.003156	3.255e-14
ABI1	ARPP21	0.004605	1.734e-06
ABI1	ARRDC3	0.0003903	2.931e-15
ABI1	ASF1A	0.00033	1.404e-07
ABI1	ASH1L	0.001283	7.696e-14
ABI1	ATAD2B	0.006423	1.241e-17
ABI1	ATG14	0.0009514	1.387e-10
ABI1	ATG2B	0.008771	2.531e-11
ABI1	ATG7	0.005754	7.528e-11
ABI1	ATL2	0.001278	9.298e-13
ABI1	ATL3	7.852e-07	2.8e-11
ABI1	ATP1B1	0.001543	5.879e-06
ABI1	ATP2B1	1.879e-05	3.83e-19
ABI1	ATPBD4	5.293e-06	4.598e-08
ABI1	ATRN	5.694e-05	7.096e-16
ABI1	ATRX	0.001941	2.402e-18
ABI1	ATXN1	0.0008351	3.82e-14
ABI1	ATXN7L1	4.555e-06	1.903e-13
ABI1	B3GALT2	9.17e-08	2.641e-06
ABI1	BAHD1	0.0002856	2.86e-07
ABI1	BAZ1A	0.005489	1.297e-11
ABI1	BAZ2A	0.003874	6.384e-09
ABI1	BBX	0.001826	1.312e-17
ABI1	BCL11B	0.007956	2.485e-12
ABI1	BCL2L11	0.0001932	1.722e-10
ABI1	BCL6	0.001186	8.218e-07
ABI1	BECN1	0.004989	2.337e-08
ABI1	BHLHE41	9.598e-05	6.475e-08
ABI1	BICD2	0.008644	1.53e-15
ABI1	BIRC6	0.001983	7.266e-18
ABI1	BIVM	0.0003888	7.909e-07
ABI1	BNC2	0.001141	3.476e-07
ABI1	BNIP2	0.0004125	2.78e-12
ABI1	BRMS1L	0.003452	4.855e-12
ABI1	BRWD1	0.0005871	1.248e-18
ABI1	BTAF1	0.001101	1.385e-18
ABI1	BTBD10	0.00994	3.049e-14
ABI1	BTBD7	5.073e-05	3.02e-17
ABI1	C11orf30	7.985e-07	3.61e-12
ABI1	C16orf52	0.0009102	5.396e-20
ABI1	C16orf70	0.003722	7.666e-07
ABI1	C17orf104	0.006672	2.607e-12
ABI1	C20orf112	0.00195	5.622e-08
ABI1	C5orf24	0.00904	1.024e-17
ABI1	C5orf30	0.001521	1.011e-07
ABI1	C6orf62	0.000526	3.426e-18
ABI1	C7orf60	6.176e-06	8.223e-22
ABI1	CA10	0.005041	3.299e-06
ABI1	CACNB4	0.006274	5.353e-06
ABI1	CADM2	0.0001758	3.632e-07
ABI1	CAMSAP2	9.887e-06	6.074e-17
ABI1	CAMTA1	0.0008903	1.627e-09
ABI1	CAPRIN1	2.452e-06	5.989e-13
ABI1	CAPRIN2	0.006531	1.816e-09
ABI1	CASD1	0.0002573	9.303e-11
ABI1	CASK	0.00844	1.331e-11
ABI1	CASP7	0.001722	2.295e-06
ABI1	CBFB	0.006331	7.875e-14
ABI1	CBLL1	0.000338	4.051e-11
ABI1	CCAR1	0.005942	2.202e-13
ABI1	CCDC88A	0.0001708	2.56e-07
ABI1	CCNJ	0.003412	3.194e-16
ABI1	CCNT2	0.001474	1.369e-23
ABI1	CDC37L1	6.89e-07	1.922e-18
ABI1	CDC42BPA	0.006967	5.754e-08
ABI1	CDK17	1.322e-05	3.219e-16
ABI1	CDK19	0.005143	2.377e-15
ABI1	CDKN2AIP	0.0003355	5.088e-12
ABI1	CDS1	0.003061	2.684e-08
ABI1	CDYL	0.003525	1.444e-09
ABI1	CELF1	0.005901	2.002e-15
ABI1	CELF2	3.235e-09	1.352e-15
ABI1	CEP57	1.01e-05	3.282e-08
ABI1	CEP97	0.0002374	2.104e-13
ABI1	CHD9	4.855e-06	5.76e-14
ABI1	CHSY3	0.005704	2.86e-08
ABI1	CHUK	0.0008084	1.326e-12
ABI1	CLASP2	0.001598	6.791e-20
ABI1	CMIP	0.007178	1.643e-08
ABI1	CMPK1	0.0002571	3.771e-11
ABI1	CNEP1R1	0.002028	6.243e-10
ABI1	CNIH	0.002914	1.909e-06
ABI1	CNOT2	0.00716	4.122e-15
ABI1	CNOT4	0.0001533	1.767e-14
ABI1	CNOT6	0.0008613	4.565e-18
ABI1	CNOT6L	0.00861	5.617e-19
ABI1	CNOT7	0.0009845	7.188e-15
ABI1	COPS2	5.556e-05	2.243e-10
ABI1	CPEB1	0.009181	1.81e-08
ABI1	CPEB2	0.005097	3.21e-18
ABI1	CPEB3	9.524e-07	1.37e-21
ABI1	CPEB4	3.122e-07	5.496e-09
ABI1	CPSF6	0.008107	8.912e-15
ABI1	CRAMP1L	0.005592	4.402e-11
ABI1	CREB1	5.83e-05	8.346e-21
ABI1	CREB5	0.005163	4.121e-10
ABI1	CREBBP	0.00394	3.898e-16
ABI1	CREBRF	0.0005648	2.847e-13
ABI1	CREBZF	0.001834	4.193e-14
ABI1	CREM	0.0001307	2.877e-11
ABI1	CRIM1	0.0003362	9.465e-10
ABI1	CSE1L	0.0008115	2.949e-07
ABI1	CSGALNACT1	0.006038	1.149e-10
ABI1	CTDSPL2	0.007562	7.979e-10
ABI1	CTR9	0.008972	4.34e-10
ABI1	CUL3	2.62e-07	2.179e-20
ABI1	CXCL12	0.0003201	1.318e-09
ABI1	CYB5R4	0.002186	1.941e-13
ABI1	DCAF12	0.0001093	4.282e-14
ABI1	DCAF8	0.0004913	6.513e-09
ABI1	DCBLD2	6.68e-06	2.092e-13
ABI1	DDX3X	0.003544	1.599e-15
ABI1	DDX5	1.11e-07	6.628e-11
ABI1	DEDD	0.004374	9.774e-11
ABI1	DENND4C	0.008871	1.519e-11
ABI1	DHX57	0.005433	1.15e-10
ABI1	DIP2A	0.006475	5.153e-09
ABI1	DIP2C	0.0002258	7.243e-23
ABI1	DLC1	0.0007942	6.533e-10
ABI1	DLG1	0.001645	3.192e-15
ABI1	DNAJB4	0.0008442	1.209e-11
ABI1	DNAJB6	8.593e-05	5.497e-09
ABI1	DNAJB9	0.003452	4.748e-11
ABI1	DNAJC16	0.0003371	3.716e-10
ABI1	DNAJC21	0.008771	1.42e-06
ABI1	DOCK4	0.002076	1.089e-15
ABI1	DPP10	4.359e-06	1.362e-06
ABI1	DPYSL2	1.136e-06	1.044e-09
ABI1	DPYSL5	0.000119	3.128e-06
ABI1	DYNC1LI2	7.129e-05	2.072e-19
ABI1	DYRK1A	0.002721	1.159e-13
ABI1	DYRK2	0.0002882	3.632e-19
ABI1	E2F5	0.0005707	4.496e-15
ABI1	EBF1	0.0002562	4.49e-08
ABI1	EEA1	0.00254	8.916e-12
ABI1	EFHA2	0.002649	2.526e-07
ABI1	ELAVL2	3.509e-06	1.029e-06
ABI1	ELK3	0.0001032	2.166e-19
ABI1	EML4	3.764e-05	1.21e-11
ABI1	ENAH	0.0003287	3.147e-10
ABI1	EPAS1	0.0004634	4.296e-09
ABI1	EPHB4	1.582e-06	1.154e-06
ABI1	EPS15	0.0006208	2.667e-23
ABI1	ERBB2IP	0.0002744	5.058e-18
ABI1	ERBB4	0.0003865	4.08e-08
ABI1	EREG	4.728e-05	8.352e-06
ABI1	ERI1	0.004174	3.709e-08
ABI1	ERLIN2	0.00167	4.711e-07
ABI1	ESR1	0.008109	3.633e-07
ABI1	ETF1	2.932e-06	5.666e-13
ABI1	ETS1	0.0003269	2.993e-07
ABI1	EYA4	5.121e-07	5.491e-08
ABI1	FAM126B	0.0002258	1.037e-18
ABI1	FAM171A1	0.0007817	2.868e-11
ABI1	FAM179B	0.003921	2.613e-21
ABI1	FAM190B	0.008662	1.259e-18
ABI1	FAM210A	0.0005376	1.832e-08
ABI1	FAM45A	0.001003	1.396e-09
ABI1	FAM60A	8.779e-05	7.639e-09
ABI1	FAM63B	0.001455	1.201e-16
ABI1	FAT1	0.007322	2.854e-06
ABI1	FAT4	0.0005587	2.515e-08
ABI1	FBXL17	0.0004545	3.283e-08
ABI1	FBXL3	0.0005171	2.832e-13
ABI1	FBXO11	0.000441	3.782e-20
ABI1	FBXO28	0.0001345	1.876e-18
ABI1	FBXO3	0.009641	1.463e-11
ABI1	FBXO33	0.001258	1.832e-10
ABI1	FBXW11	1.44e-07	4.989e-19
ABI1	FCHO2	0.00382	1.868e-19
ABI1	FEM1C	0.008218	1.407e-08
ABI1	FERMT2	0.001298	1.058e-13
ABI1	FGD4	4.59e-05	1.388e-21
ABI1	FGF7	0.006794	1.453e-06
ABI1	FILIP1L	0.002187	5.616e-11
ABI1	FOXA1	4.482e-05	9.805e-08
ABI1	FOXJ2	0.003514	3.5e-14
ABI1	FOXJ3	0.00382	2.389e-11
ABI1	FOXP1	4.443e-06	5.551e-07
ABI1	FRMD6	0.0008029	1.099e-11
ABI1	FSTL1	0.006038	4.01e-08
ABI1	FUBP1	0.0003472	8.962e-06
ABI1	FUBP3	0.0003509	5.445e-10
ABI1	FYCO1	0.0002696	1.594e-09
ABI1	G3BP2	0.003993	2.314e-12
ABI1	GABRB2	0.002343	2.269e-11
ABI1	GALNT1	0.001788	1.077e-16
ABI1	GIT2	0.0003583	8.955e-14
ABI1	GJA1	0.001353	3.229e-13
ABI1	GLYR1	0.008955	3.148e-10
ABI1	GMFB	4.612e-05	8.727e-20
ABI1	GNS	0.0008749	1.147e-12
ABI1	GOSR1	0.00145	2.237e-08
ABI1	GPBP1	0.003601	7.804e-07
ABI1	GPM6A	0.0004434	1.445e-06
ABI1	GPR158	8.33e-05	1.202e-07
ABI1	GPR180	0.00324	1.043e-17
ABI1	GSK3B	3.669e-05	1.293e-18
ABI1	GTF2H1	5.335e-05	1.142e-14
ABI1	HAS2	0.009105	9.788e-10
ABI1	HBP1	0.0001942	3.222e-17
ABI1	HDAC9	0.0005141	8.261e-07
ABI1	HEY2	0.005456	2.399e-06
ABI1	HIAT1	6.251e-06	3.37e-25
ABI1	HIF1A	7.323e-06	1.169e-12
ABI1	HIVEP2	4.512e-05	2.858e-16
ABI1	HMGCS1	0.0005587	2.988e-10
ABI1	HNRNPH3	0.009105	1.148e-12
ABI1	HNRNPK	0.007337	6.432e-10
ABI1	HOOK3	0.0006021	1.867e-20
ABI1	HOXA3	0.001718	9.491e-08
ABI1	HOXA9	0.003039	9.599e-07
ABI1	HP1BP3	1.467e-05	1.781e-09
ABI1	HSPA8	8.681e-06	1.607e-12
ABI1	IGF1	0.002278	1.02e-06
ABI1	IGF2BP1	0.0009331	8.929e-07
ABI1	IKZF4	0.002011	1.641e-11
ABI1	ILF3	0.0005143	2.092e-06
ABI1	INO80	3.684e-05	6.022e-18
ABI1	INO80D	0.0001945	9.374e-17
ABI1	INTS6	0.004003	1.316e-11
ABI1	IREB2	0.001155	5.9e-19
ABI1	IRF2BPL	7.693e-05	8e-10
ABI1	ITCH	2.676e-05	4.155e-19
ABI1	ITGA4	3.586e-05	3.796e-06
ABI1	ITGA6	0.001866	3.222e-10
ABI1	JAK1	1.233e-06	1.043e-07
ABI1	JAZF1	9.69e-05	1.334e-11
ABI1	JHDM1D	0.004869	2.023e-18
ABI1	KAT2B	0.0001978	2.068e-12
ABI1	KBTBD2	0.0002413	7.779e-19
ABI1	KBTBD8	0.0001388	7.65e-13
ABI1	KCNJ10	1.103e-06	1.57e-07
ABI1	KCNK10	3.525e-05	1.532e-10
ABI1	KCTD3	0.008921	2.199e-06
ABI1	KDM2A	7.477e-08	2.66e-15
ABI1	KDM6A	0.0003532	2.724e-12
ABI1	KHSRP	0.00836	1.693e-06
ABI1	KIAA0494	2.711e-05	1.634e-10
ABI1	KIAA1598	0.0006112	6.72e-09
ABI1	KIF13A	1.836e-05	4.225e-12
ABI1	KIF26B	0.0005641	5.577e-06
ABI1	KIF5A	0.005811	7.324e-07
ABI1	KIF5B	0.00705	5.845e-15
ABI1	KLF10	0.0008982	5.83e-11
ABI1	KLF11	0.003828	2.091e-09
ABI1	KLF3	0.002609	4.373e-11
ABI1	KLHL15	0.0004275	9.617e-20
ABI1	KLHL2	7.119e-07	7.27e-08
ABI1	KLHL9	0.0008749	4.662e-14
ABI1	KPNA3	0.00502	4.357e-17
ABI1	KPNA4	0.00502	3.305e-16
ABI1	KPNA6	0.00268	1.574e-07
ABI1	LACE1	0.0008115	1.327e-06
ABI1	LARP4B	4.816e-06	8.239e-25
ABI1	LCLAT1	0.008305	5.272e-07
ABI1	LCOR	4.031e-06	1.526e-14
ABI1	LCORL	0.0006001	1.595e-22
ABI1	LIMA1	0.001154	4.781e-08
ABI1	LMBRD2	0.0009976	6.072e-07
ABI1	LPGAT1	0.000501	1.932e-13
ABI1	LPHN2	1.143e-05	1.28e-08
ABI1	LPHN3	0.0007028	2.199e-11
ABI1	LRCH1	3.915e-06	1.062e-15
ABI1	LRCH2	0.002187	7.028e-10
ABI1	LRP12	6.397e-06	4.972e-09
ABI1	LRP4	0.002693	2.437e-10
ABI1	LRRC1	0.002339	1.073e-08
ABI1	MACF1	0.00705	5.64e-06
ABI1	MACROD2	0.0004985	7.942e-08
ABI1	MAF	0.008414	7.612e-11
ABI1	MAGI1	2.19e-06	2.12e-13
ABI1	MAGI3	0.0006879	8.504e-10
ABI1	MAML3	0.001507	3.612e-06
ABI1	MAP1B	1.974e-05	3.585e-11
ABI1	MAP3K1	0.003539	4.5e-10
ABI1	MAP3K2	0.006794	2.627e-15
ABI1	MAP3K4	0.003267	1.079e-06
ABI1	MAP3K5	1.795e-06	1.262e-09
ABI1	MAP3K8	6.352e-06	1.06e-08
ABI1	MAP4K4	1.858e-07	9.884e-20
ABI1	MAP7	1.178e-05	1.048e-06
ABI1	MAPRE1	7.829e-05	1.271e-19
ABI1	MARCH1	5.735e-05	3.497e-07
ABI1	MARCH6	0.0003107	4.327e-11
ABI1	MAST4	9.629e-05	9.099e-08
ABI1	MASTL	1.078e-07	1.902e-12
ABI1	MAT2B	0.001451	3.749e-11
ABI1	MBNL1	0.0001864	2.209e-22
ABI1	MBNL3	0.009296	1.37e-12
ABI1	MBTD1	0.0005382	5.119e-16
ABI1	MCL1	0.00462	3.327e-12
ABI1	MECOM	1.867e-06	6.179e-09
ABI1	MED12L	3.122e-07	2.411e-11
ABI1	MEF2A	0.0001599	3.666e-12
ABI1	MET	0.0001526	2.542e-09
ABI1	MEX3B	4.252e-05	2.897e-07
ABI1	MFF	9.605e-06	7.725e-07
ABI1	MGAT2	1.457e-05	6.408e-08
ABI1	MGEA5	0.0004852	9.97e-15
ABI1	MIER3	0.000338	8.811e-19
ABI1	MITF	0.002721	6.03e-10
ABI1	MKRN1	0.0006911	5.735e-10
ABI1	MLL	3.217e-06	1.052e-19
ABI1	MLL2	0.006832	4.533e-13
ABI1	MLL5	0.002259	2.588e-19
ABI1	MOSPD2	0.008771	1.919e-11
ABI1	MPPED2	0.001623	2.469e-07
ABI1	MSL1	0.007405	2.773e-07
ABI1	MTDH	0.006107	3.649e-15
ABI1	MTF1	2.254e-06	2.453e-13
ABI1	MTF2	1.903e-06	1.917e-11
ABI1	MTMR2	0.008771	1.038e-09
ABI1	MTMR9	0.001935	1.161e-07
ABI1	MXD1	1.067e-05	8.499e-07
ABI1	MYBL1	5.981e-05	1.383e-07
ABI1	MYNN	2.859e-05	2.937e-11
ABI1	MYT1L	9.934e-05	1.459e-06
ABI1	N4BP1	0.004201	1.665e-14
ABI1	NAA16	0.007876	2.165e-12
ABI1	NAA30	0.0001084	6.878e-14
ABI1	NAA50	0.008174	1.144e-16
ABI1	NABP1	0.0001179	1.007e-08
ABI1	NBEA	0.001204	1.398e-07
ABI1	NCKAP1	0.00436	7.706e-21
ABI1	NCOA1	0.004926	2.581e-06
ABI1	NCOA3	1.415e-05	8.396e-17
ABI1	NDEL1	0.002937	8.911e-10
ABI1	NEDD4L	0.0009331	9.638e-07
ABI1	NEK7	0.0007513	4.325e-20
ABI1	NFIA	0.0008497	7.568e-11
ABI1	NFIB	3.313e-05	3.313e-07
ABI1	NHLH1	7.758e-07	1.12e-06
ABI1	NHLH2	0.003049	1.834e-09
ABI1	NHS	0.003159	9.933e-09
ABI1	NHSL1	0.001446	7.484e-08
ABI1	NMT2	0.004948	1.764e-08
ABI1	NPAT	1.591e-07	2.007e-17
ABI1	NPC1	0.005251	6.923e-12
ABI1	NPTN	0.00994	1.208e-07
ABI1	NR3C2	0.002292	6.173e-08
ABI1	NRBF2	0.0007013	2.266e-13
ABI1	NRP1	0.002585	1.923e-06
ABI1	NRP2	0.0003761	1.069e-12
ABI1	NRXN3	0.003523	3.287e-06
ABI1	NUCKS1	0.008926	1.289e-11
ABI1	NUFIP2	1.316e-05	9.065e-18
ABI1	NUMB	3.868e-05	1.482e-17
ABI1	ODZ1	0.0006751	7.803e-08
ABI1	ODZ3	0.003739	5.365e-09
ABI1	OTUD4	0.0002481	3.284e-18
ABI1	OXR1	0.007883	1.83e-16
ABI1	PAFAH1B1	0.001787	1.04e-15
ABI1	PAK7	0.00796	1.319e-06
ABI1	PALLD	0.0003434	1.449e-12
ABI1	PAPD5	0.001179	6.351e-18
ABI1	PAPOLG	0.009111	2.721e-15
ABI1	PAXIP1	0.0005587	9.516e-09
ABI1	PBX1	0.0005829	1.665e-08
ABI1	PBX3	0.001309	4.078e-06
ABI1	PCDH17	0.006205	8.217e-13
ABI1	PCNP	2.792e-05	5.085e-19
ABI1	PDE4B	0.008109	3.313e-06
ABI1	PDGFRA	0.0001913	1.186e-10
ABI1	PDIK1L	2.381e-05	9.117e-15
ABI1	PDS5A	0.0002744	1.14e-10
ABI1	PDS5B	0.004822	4.513e-20
ABI1	PGRMC2	0.001456	2.063e-09
ABI1	PHF14	0.005114	3.848e-09
ABI1	PHF17	0.001117	3.285e-06
ABI1	PHF20L1	0.001471	3.224e-18
ABI1	PHF3	0.0001888	1.191e-13
ABI1	PHF6	0.005853	1.336e-20
ABI1	PHYHIPL	0.001347	1.819e-09
ABI1	PIP5K1B	0.0006908	1.553e-06
ABI1	PJA2	0.002259	3.301e-18
ABI1	PKD2	0.007375	9.968e-10
ABI1	PKN2	0.0006975	5.055e-18
ABI1	PLCB1	2.106e-05	5.393e-08
ABI1	PLEKHA3	2.313e-06	2.11e-17
ABI1	PLEKHM1	0.004174	2.651e-08
ABI1	PNRC1	2.574e-05	4.141e-10
ABI1	PPARGC1A	0.002191	2.433e-07
ABI1	PPARGC1B	0.003374	1.103e-07
ABI1	PPM1A	0.001046	3.824e-16
ABI1	PPM1B	3.943e-05	2.031e-14
ABI1	PPP1R15B	0.003319	1.03e-12
ABI1	PPP2R1B	0.006201	2.385e-08
ABI1	PPP3R1	0.0001978	9.95e-16
ABI1	PPP6R2	3.1e-06	8.876e-06
ABI1	PPP6R3	4.539e-05	1.743e-10
ABI1	PRICKLE2	0.00033	6.259e-10
ABI1	PRKAA1	0.000409	6.125e-10
ABI1	PRKAR1A	0.005903	2.427e-09
ABI1	PRKD3	0.003157	1.25e-14
ABI1	PRR14L	0.001749	1.68e-12
ABI1	PSD3	0.0018	2.338e-07
ABI1	PTEN	4.615e-06	2.034e-12
ABI1	PTHLH	0.0006021	1.571e-06
ABI1	PTP4A1	0.001237	2.141e-08
ABI1	PTPN13	0.005026	1.611e-09
ABI1	PTPN4	0.001718	2.575e-14
ABI1	PUM2	0.002259	4.16e-15
ABI1	PURA	0.0006458	1.975e-09
ABI1	PURB	2.697e-06	2.781e-08
ABI1	RAB10	0.008353	8.378e-24
ABI1	RAB12	7.07e-05	4.028e-11
ABI1	RAB30	0.001325	6.307e-08
ABI1	RAB5B	0.002186	3.509e-12
ABI1	RAB5C	0.008291	1.543e-07
ABI1	RAB8B	0.003751	9.198e-14
ABI1	RABEP1	0.0004552	4.33e-09
ABI1	RABGAP1	0.001992	5.915e-13
ABI1	RACGAP1	5.401e-05	7.621e-08
ABI1	RAD21	0.0001484	1.846e-11
ABI1	RALBP1	0.0002571	8.666e-14
ABI1	RAP2C	1.17e-06	7.755e-11
ABI1	RAPGEF4	1.092e-06	3.134e-08
ABI1	RARB	7.512e-07	1.331e-07
ABI1	RASSF2	0.008921	3.438e-08
ABI1	RB1	8.659e-06	2.202e-14
ABI1	RBL2	3.342e-05	1.222e-18
ABI1	RBM17	0.00819	1.324e-09
ABI1	RBM24	0.0003711	7.777e-08
ABI1	RBM25	7.426e-06	4.171e-14
ABI1	RBM26	0.0006282	1.497e-15
ABI1	RBM27	0.003944	1.543e-18
ABI1	RCOR1	0.0003865	1.811e-14
ABI1	RECK	0.002507	5.097e-10
ABI1	REEP1	0.00777	3.74e-06
ABI1	REST	0.00108	1.15e-17
ABI1	REV3L	0.004589	9.389e-12
ABI1	RFFL	0.001231	4.341e-09
ABI1	RFX5	0.00819	2.139e-06
ABI1	RFX7	0.0002188	1.258e-14
ABI1	RIMS2	0.0007596	2.801e-07
ABI1	RLIM	0.0001346	1.095e-22
ABI1	RNF115	5.45e-05	7.293e-07
ABI1	RNF13	0.0003987	5.929e-16
ABI1	RNF138	0.006531	1.756e-13
ABI1	RNF145	4.233e-16	1.544e-07
ABI1	RNF19A	8.5e-06	3.298e-12
ABI1	RNF2	0.0005175	1.664e-12
ABI1	RNF219	0.007981	4.701e-08
ABI1	RNF6	0.006204	1.41e-11
ABI1	ROBO1	0.0001291	4.911e-12
ABI1	ROCK2	0.004256	9.234e-17
ABI1	RORA	0.0006138	1.041e-18
ABI1	RPS6KA3	0.000458	1.226e-14
ABI1	RPS6KA5	0.002552	1.185e-10
ABI1	RRAGD	6.992e-05	4.792e-06
ABI1	RREB1	0.00323	9.678e-15
ABI1	RUNX1	0.004853	1.665e-06
ABI1	RUNX2	3.187e-05	3.102e-10
ABI1	RUNX3	8.366e-05	1.809e-06
ABI1	RYBP	1e-07	1.898e-20
ABI1	S1PR1	0.007847	2.169e-08
ABI1	SACS	0.001131	1.283e-12
ABI1	SALL1	0.003622	1.941e-09
ABI1	SATB1	9.442e-06	1.007e-07
ABI1	SBF2	0.004862	1.098e-14
ABI1	SBNO1	0.002042	3.412e-11
ABI1	SCAI	0.002583	6.799e-11
ABI1	SCN3A	0.002588	2.934e-09
ABI1	SEC23IP	0.0003371	1.355e-09
ABI1	SEPT7	0.003739	1.307e-20
ABI1	SERINC3	0.0003557	1.533e-12
ABI1	SERINC5	0.004458	1.95e-12
ABI1	SERTAD2	0.0002222	3.536e-13
ABI1	SFMBT1	0.0001886	4.343e-10
ABI1	SGTB	0.002037	2.213e-17
ABI1	SH3PXD2A	0.003267	1.104e-08
ABI1	SIK3	0.009153	1.781e-06
ABI1	SKI	0.0003317	1.689e-09
ABI1	SKIDA1	0.002298	8.064e-08
ABI1	SLAIN2	0.004833	2.094e-18
ABI1	SLC12A2	3.622e-07	4.83e-11
ABI1	SLC24A2	0.0001078	2.252e-06
ABI1	SLC25A44	0.008348	3.154e-06
ABI1	SLC33A1	0.00918	3.403e-09
ABI1	SLITRK4	0.0007481	1.18e-06
ABI1	SMAD1	4.636e-05	2.712e-12
ABI1	SMAD7	5.761e-05	4.367e-07
ABI1	SMEK2	0.006923	1.218e-19
ABI1	SNIP1	0.002882	2.888e-14
ABI1	SNRK	0.0001473	2.496e-16
ABI1	SNX13	0.004885	1.433e-20
ABI1	SNX5	0.001304	1.585e-11
ABI1	SNX9	3.831e-06	1.374e-11
ABI1	SOCS6	0.0002277	6.193e-13
ABI1	SOX11	0.003319	2.32e-08
ABI1	SOX4	2.917e-05	1.522e-09
ABI1	SOX6	2.915e-05	7.527e-08
ABI1	SP4	0.007555	6.471e-14
ABI1	SPIN1	0.0006589	2.207e-13
ABI1	SPOPL	3.829e-07	3.28e-21
ABI1	SPRED1	0.005644	9.378e-13
ABI1	SPTBN1	0.005882	7.808e-12
ABI1	SPTY2D1	0.004354	5.949e-15
ABI1	SRGAP2	0.009317	4.103e-12
ABI1	SRPK2	0.008257	6.268e-16
ABI1	SRSF2	2.507e-05	1.195e-15
ABI1	SS18L1	2.172e-05	4.527e-08
ABI1	ST18	0.002259	1.892e-09
ABI1	STAG1	0.00556	1.007e-18
ABI1	STAG2	0.001518	5.126e-13
ABI1	STAT3	0.00918	5.526e-08
ABI1	STAU1	0.0001597	7.212e-09
ABI1	STC1	0.0003337	6.526e-07
ABI1	STK33	8.525e-06	4.409e-06
ABI1	STK38L	0.004315	3.217e-15
ABI1	STRN3	8.202e-05	1.59e-10
ABI1	SUV420H1	0.0005495	1.644e-17
ABI1	SYNCRIP	7.275e-06	2.365e-14
ABI1	SYNE1	0.002722	1.496e-10
ABI1	TAB3	0.00507	2.71e-18
ABI1	TACC1	0.0039	1.755e-09
ABI1	TANC1	2.365e-09	4.955e-12
ABI1	TBC1D15	0.0002655	6.577e-15
ABI1	TBC1D9	1.359e-06	5.165e-07
ABI1	TBL1X	1.366e-08	1.957e-08
ABI1	TBL1XR1	0.0008232	3.607e-20
ABI1	TCF20	0.004922	1.585e-10
ABI1	TCF4	1.257e-05	6.737e-16
ABI1	TEAD1	8.5e-06	4.793e-13
ABI1	TET2	0.008192	1.891e-18
ABI1	TET3	2.112e-05	8.659e-14
ABI1	TFDP1	0.007068	2.163e-06
ABI1	TGFB2	0.005367	2.263e-12
ABI1	TGFBR1	0.008052	1.475e-14
ABI1	TGOLN2	1.671e-05	3.426e-08
ABI1	THSD7A	0.004165	2.094e-10
ABI1	TIAM1	0.000372	1.048e-06
ABI1	TM9SF3	0.004313	1.069e-12
ABI1	TMCC1	0.007193	3.674e-15
ABI1	TMEM131	3.46e-06	1.249e-13
ABI1	TMEM151B	0.002151	8.661e-07
ABI1	TNFRSF21	0.0006282	3.271e-06
ABI1	TNFSF11	1.072e-06	2.019e-08
ABI1	TNKS2	0.004003	9.364e-22
ABI1	TNPO1	0.001016	1.224e-12
ABI1	TNRC6A	3.444e-05	3.605e-15
ABI1	TNRC6B	0.00156	1.345e-13
ABI1	TOP1	0.008344	7.439e-14
ABI1	TOX3	0.001936	2.836e-06
ABI1	TRA2B	0.001293	7.555e-09
ABI1	TRAPPC10	8.853e-05	6.548e-16
ABI1	TRERF1	0.00323	1.126e-09
ABI1	TRIM3	0.0005368	9.377e-06
ABI1	TRIM37	1.876e-08	1.168e-14
ABI1	TRPS1	0.00584	8.726e-11
ABI1	TSG101	1.11e-07	1.055e-06
ABI1	TSHZ1	0.0007376	1.043e-12
ABI1	TSHZ2	4.293e-05	3.537e-08
ABI1	TSPAN18	0.006176	4.024e-08
ABI1	TTC30A	0.009583	1.691e-07
ABI1	TWF1	0.0001792	3.796e-13
ABI1	U2SURP	3.506e-06	1.219e-16
ABI1	UBE2D1	0.001185	4.806e-18
ABI1	UBE2W	0.007875	2.668e-13
ABI1	UBE3C	0.004098	6.162e-16
ABI1	UBFD1	0.001365	1.103e-08
ABI1	UBL3	0.004867	8.982e-13
ABI1	UBQLN1	0.008028	6.299e-15
ABI1	UNK	0.008871	1.594e-06
ABI1	UNKL	0.001011	4.617e-08
ABI1	URI1	0.006148	8.381e-15
ABI1	USP13	0.006475	8.657e-07
ABI1	USP28	0.005592	3.536e-11
ABI1	USP3	0.004153	3.112e-06
ABI1	USP31	0.001796	1.567e-07
ABI1	USP32	0.0001099	6.382e-10
ABI1	USP34	0.0007901	1.215e-14
ABI1	USP46	0.004862	2.399e-14
ABI1	USP6	0.001882	2.202e-06
ABI1	USP6NL	3.145e-07	7.809e-26
ABI1	USP9X	0.006973	1.259e-20
ABI1	VASH2	0.0001235	2.803e-08
ABI1	VCL	0.0004974	7.431e-13
ABI1	VCPIP1	4.988e-05	1e-17
ABI1	VGLL2	0.00728	5.339e-07
ABI1	VGLL4	0.000968	3.555e-15
ABI1	VPS26A	0.0005968	8.062e-18
ABI1	VPS37A	0.009583	1.302e-06
ABI1	WAC	0.003993	2.186e-27
ABI1	WASF1	6.176e-05	4.316e-07
ABI1	WASF2	0.002099	2.56e-08
ABI1	WDFY3	0.0002737	1.662e-12
ABI1	WDR20	0.004558	5.688e-09
ABI1	WDR43	0.001187	3.155e-14
ABI1	WEE1	7.635e-05	1.35e-15
ABI1	WNK1	9.147e-07	3.263e-24
ABI1	WNK3	0.002999	4.018e-17
ABI1	WTAP	0.005945	5.316e-26
ABI1	WWC2	0.002052	3.212e-07
ABI1	XRN1	1.107e-05	9.695e-19
ABI1	XYLT1	0.009888	7.574e-09
ABI1	YTHDF3	0.0001352	4.196e-18
ABI1	YWHAG	0.009407	1.436e-10
ABI1	ZBTB34	4.55e-06	4.795e-12
ABI1	ZBTB4	0.003367	3.147e-08
ABI1	ZBTB41	0.005031	2.279e-14
ABI1	ZBTB43	0.006743	3.164e-06
ABI1	ZBTB5	0.002186	1.445e-18
ABI1	ZC3H12C	0.0006898	4.657e-13
ABI1	ZC3H7B	0.0002681	4.967e-06
ABI1	ZCCHC14	0.00994	1.801e-11
ABI1	ZEB1	2.606e-07	3.487e-09
ABI1	ZEB2	0.004013	4.834e-18
ABI1	ZFAND4	4.554e-05	1.515e-07
ABI1	ZFHX3	0.006204	4.645e-08
ABI1	ZFHX4	0.0007413	1.236e-06
ABI1	ZFP161	0.0003317	7.568e-11
ABI1	ZFP36L1	0.0007656	5.173e-07
ABI1	ZFP91	0.0001955	1.147e-19
ABI1	ZFPM2	0.008541	1.379e-13
ABI1	ZHX1	0.0004151	3.598e-19
ABI1	ZHX2	0.0003947	1.821e-09
ABI1	ZIC1	0.002585	7.03e-06
ABI1	ZMIZ1	0.002775	1.982e-07
ABI1	ZNF217	8.191e-06	2.674e-14
ABI1	ZNF236	0.001642	1.609e-14
ABI1	ZNF238	6.487e-07	3.177e-11
ABI1	ZNF24	0.0006705	1.736e-15
ABI1	ZNF254	0.006078	4.087e-08
ABI1	ZNF295	0.002218	3.029e-17
ABI1	ZNF407	0.0009976	5.642e-14
ABI1	ZNF503	0.006819	5.894e-07
ABI1	ZNF644	0.006713	2.033e-15
ABI1	ZNF701	0.007803	2.691e-06
ABI1	ZNF704	0.00142	2.924e-14
ABI1	ZNF800	0.0006175	1.377e-20
ABI1	ZNF804A	8.943e-05	2.159e-07
ABI1	ZNFX1	0.00443	3.744e-07
ABI1	ZNRF3	0.007186	5.988e-07
ABI1	ZZZ3	0.002398	5.255e-16
ABI2	AEBP2	0.0001596	1.614e-21
ABI2	AKAP11	0.007122	3.149e-15
ABI2	ANK3	0.005018	3.696e-07
ABI2	ARHGEF9	0.008993	4.936e-08
ABI2	ARIH1	0.00986	2.862e-12
ABI2	ARL8B	0.004184	7.737e-06
ABI2	ARMC1	0.0001033	2.766e-13
ABI2	ATXN1	0.004019	1.928e-10
ABI2	ATXN1L	0.006931	2.208e-11
ABI2	BDP1	0.00951	3.449e-10
ABI2	BMPR1A	0.004412	5.103e-09
ABI2	C16orf72	0.00411	3.034e-06
ABI2	C3orf23	4.1e-05	5.347e-06
ABI2	CAB39	0.0008864	1.116e-11
ABI2	CCNT2	0.001265	4.84e-19
ABI2	CCNYL1	0.007959	7.08e-08
ABI2	CDC23	0.002967	1.679e-07
ABI2	CDC37L1	0.005327	4.708e-06
ABI2	CDK12	0.002032	4.377e-13
ABI2	CDK17	0.0005808	3.818e-18
ABI2	CGGBP1	0.004119	6.575e-20
ABI2	CHD2	0.006226	2.793e-14
ABI2	CHD6	0.002772	2.482e-10
ABI2	DACH1	0.001287	4.865e-06
ABI2	DNAJC16	0.007959	3.992e-13
ABI2	DPP8	0.006074	5.98e-13
ABI2	DYRK1A	0.005301	7.959e-17
ABI2	E2F3	0.002402	7.85e-06
ABI2	ETF1	0.001818	1.024e-10
ABI2	EZH1	0.003308	1.117e-07
ABI2	FAM133B	0.003498	5.369e-11
ABI2	FAT4	0.002526	1.176e-08
ABI2	FBXW7	0.002217	5.23e-12
[truncated: 475,917+ more rows]

## Sheet: RNA1 <- RNA2
RNA1	RNA2	Adjusted Pval (overlap)	Adjusted Pval (expression)
A1CF	FAT3	0.003181	6.145e-06
A1CF	SATB2	0.000318	6.252e-06
A1CF	SOX6	0.0004114	1.19e-06
A1CF	ZNF367	0.0005904	5.761e-06
A2LD1	ACBD5	0.004279	4.102e-06
A2LD1	CCND1	0.001466	1.084e-07
A2LD1	CCNJ	0.003558	8.577e-06
A2LD1	CDC25A	0.00737	6.697e-06
A2LD1	CDCA7	0.001871	4.601e-06
A2LD1	CERS6	0.009045	7.907e-06
A2LD1	CROT	0.003746	7.121e-06
A2LD1	FIBIN	0.007224	7.55e-06
A2LD1	KLF9	0.0068	2.427e-08
A2LD1	KPNA2	0.004023	7.085e-06
A2LD1	PTEN	0.003089	3.007e-08
A2LD1	REEP5	0.001445	7.052e-07
A2LD1	RUNX3	8.043e-05	4.211e-06
A2LD1	SLC39A6	0.0003602	6.956e-07
A2LD1	TMEM25	0.003442	4.74e-06
AAK1	AHNAK	0.0004528	5.354e-11
AAK1	BCL2L11	0.004644	5.837e-09
AAK1	C11orf82	0.002179	2.14e-08
AAK1	C3orf38	0.007554	6.287e-06
AAK1	CAPRIN2	0.0004534	3.149e-13
AAK1	CPNE2	0.006001	2.379e-06
AAK1	ENPP5	0.003922	5.19e-08
AAK1	FRMD4A	0.00778	5.669e-07
AAK1	FYCO1	0.004048	3.358e-10
AAK1	GMCL1	0.002768	1.662e-16
AAK1	HBP1	0.004308	6.377e-11
AAK1	HOOK3	0.001753	1.062e-13
AAK1	ITFG1	0.003389	7.441e-06
AAK1	MAP3K9	0.008029	1.511e-11
AAK1	MASTL	0.000552	6.351e-10
AAK1	MTPAP	0.006438	1.042e-06
AAK1	NBEAL1	0.004852	8.318e-10
AAK1	POLR3G	0.007173	2.568e-06
AAK1	ROCK2	0.005702	1.65e-18
AAK1	SLC35F5	0.002298	2.768e-12
AAK1	ZBTB4	0.004505	2.077e-11
AAK1	ZNFX1	0.005937	2.674e-12
AASDHPPT	RPAP3	0.004809	2.211e-06
AATK	KLF5	0.0006748	2.344e-07
ABAT	CCNG2	0.006259	3.227e-06
ABCA1	ABCB7	0.00343	3.94e-06
ABCA1	ABI1	2.523e-05	1.953e-14
ABCA1	ACBD5	3.174e-11	1.373e-12
ABCA1	ACVR1	0.0001053	1.047e-16
ABCA1	ACVR1C	3.147e-07	2.787e-10
ABCA1	ADAM12	0.001617	2.287e-09
ABCA1	ADAM9	0.002116	7.558e-12
ABCA1	ADAMTS18	1.642e-05	7.684e-09
ABCA1	ADAMTSL3	0.004788	4.492e-07
ABCA1	AEBP2	0.005346	2.705e-13
ABCA1	AKAP11	0.0057	9.931e-11
ABCA1	AKAP7	0.008956	2.702e-08
ABCA1	AKAP9	0.006299	7.552e-09
ABCA1	ALCAM	0.0005343	1.909e-06
ABCA1	ALS2CR8	0.002586	1.114e-09
ABCA1	ALX4	0.0002186	1.971e-06
ABCA1	AMMECR1	0.005299	4.069e-07
ABCA1	ANK2	0.0003005	5.495e-17
ABCA1	ANKIB1	0.00129	1.279e-17
ABCA1	ANKRD11	2.858e-05	3.316e-10
ABCA1	ANKRD12	0.003635	1.909e-08
ABCA1	ANKRD13C	5.934e-07	8.634e-14
ABCA1	ANKRD50	8.147e-07	3.711e-13
ABCA1	ANKRD52	0.001054	5.571e-16
ABCA1	ANO6	0.007049	1.978e-11
ABCA1	API5	1.636e-05	2.92e-06
ABCA1	APPL1	0.002461	1.463e-15
ABCA1	ARAP2	0.0003869	5.958e-11
ABCA1	ARFGEF1	0.000173	5.052e-08
ABCA1	ARHGAP1	0.0002105	5.509e-10
ABCA1	ARHGAP12	4.769e-05	1.107e-07
ABCA1	ARHGAP21	8.561e-05	1.709e-13
ABCA1	ARHGEF10	0.008416	5.296e-07
ABCA1	ARHGEF12	0.00547	8.181e-10
ABCA1	ARHGEF17	0.0004554	9.02e-08
ABCA1	ARHGEF18	0.0003468	3.035e-07
ABCA1	ARHGEF4	0.0075	1.754e-10
ABCA1	ARHGEF7	0.001376	8.418e-08
ABCA1	ARID4A	0.009947	3.842e-14
ABCA1	ARID4B	8.796e-05	7.806e-13
ABCA1	ARID5B	3e-06	9.524e-09
ABCA1	ARRDC3	0.0005842	3.848e-12
ABCA1	ASAP1	0.0007698	1.776e-19
ABCA1	ASH1L	0.0001292	4.266e-12
ABCA1	ASXL2	6.259e-05	5.422e-11
ABCA1	ATAD2B	0.006089	1.751e-10
ABCA1	ATG14	0.0016	9.026e-08
ABCA1	ATG16L1	0.004359	2.378e-08
ABCA1	ATL2	0.002675	6.75e-15
ABCA1	ATP11A	0.001704	2.298e-11
ABCA1	ATP2B1	0.0001438	9.479e-12
ABCA1	ATP2B2	1.743e-05	4.698e-06
ABCA1	ATP6V0E1	5.901e-05	2.087e-06
ABCA1	ATXN1	2.826e-05	2.339e-17
ABCA1	ATXN7L1	2.658e-05	1.583e-07
ABCA1	B4GALT6	0.000403	3.041e-10
ABCA1	BACH2	0.005193	3.535e-13
ABCA1	BAI3	0.0006512	2.491e-07
ABCA1	BBX	9.042e-06	1.5e-19
ABCA1	BCL11B	5.262e-05	4.132e-10
ABCA1	BCL2L11	6.423e-09	7.283e-12
ABCA1	BHLHE41	0.0005042	1.531e-10
ABCA1	BMP6	0.0001659	1.653e-06
ABCA1	BNC1	0.00325	4.232e-06
ABCA1	BNC2	0.000203	2.565e-16
ABCA1	BPTF	0.004944	1.346e-11
ABCA1	BRWD1	2.469e-06	4.854e-09
ABCA1	BRWD3	0.0004528	2.621e-17
ABCA1	BTAF1	0.004575	1.376e-21
ABCA1	BTBD10	0.000444	2.009e-06
ABCA1	BTBD7	2.685e-06	5.158e-12
ABCA1	C10orf12	6.155e-06	1.766e-11
ABCA1	C11orf82	1.172e-05	9.586e-08
ABCA1	C16orf70	9.355e-06	1.299e-08
ABCA1	C1GALT1	0.0002514	2.659e-07
ABCA1	C2orf69	0.002853	1.317e-07
ABCA1	C3orf58	0.003091	2.869e-09
ABCA1	C5orf24	0.0009704	2.926e-20
ABCA1	C5orf30	2.01e-05	2.08e-11
ABCA1	C7orf60	0.0003153	1.732e-18
ABCA1	CAMSAP2	0.0001165	2.945e-12
ABCA1	CAMTA1	2.933e-06	7.134e-12
ABCA1	CAPRIN2	1.025e-06	3.517e-08
ABCA1	CASZ1	0.0001416	6.286e-09
ABCA1	CBFB	0.003899	3.821e-14
ABCA1	CBLN4	0.004499	3.42e-06
ABCA1	CCDC85A	3.047e-05	6.471e-09
ABCA1	CCDC88A	0.003216	2.771e-19
ABCA1	CCND1	0.002043	9.624e-06
ABCA1	CCND2	0.004121	2.547e-10
ABCA1	CCNG2	0.002055	1.172e-06
ABCA1	CCT6A	9.767e-06	4.096e-06
ABCA1	CDC23	0.006204	6.003e-06
ABCA1	CDC25A	0.002147	1.582e-07
ABCA1	CDK17	0.001946	3.918e-15
ABCA1	CDK19	0.004291	3.852e-08
ABCA1	CDK2	4.315e-05	6.022e-09
ABCA1	CELF2	0.001311	1.02e-21
ABCA1	CENPO	0.00323	4.135e-08
ABCA1	CEP120	0.002659	5.949e-16
ABCA1	CEP170	0.0003971	1.879e-21
ABCA1	CEP55	0.001258	1.188e-07
ABCA1	CERS6	0.001404	8.056e-10
ABCA1	CHD2	0.0001696	1.133e-11
ABCA1	CIT	0.0004596	4.86e-07
ABCA1	CLDND1	2.192e-05	6.446e-08
ABCA1	CLIP1	0.0001592	1.71e-06
ABCA1	CLIP4	0.007679	4.719e-08
ABCA1	CLOCK	0.00148	1.53e-17
ABCA1	CMPK1	0.0007669	5.228e-11
ABCA1	CNEP1R1	0.005498	1.53e-15
ABCA1	CNN1	0.001923	7.124e-07
ABCA1	CNOT4	0.001836	1.065e-12
ABCA1	CNOT6	3.56e-05	6.676e-16
ABCA1	CNOT7	0.0001294	9.589e-10
ABCA1	COL10A1	0.0006034	1.432e-09
ABCA1	CPEB1	0.002288	4.858e-09
ABCA1	CPEB2	0.001057	6.353e-11
ABCA1	CPEB4	0.0001112	3.28e-14
ABCA1	CPNE2	0.0002415	3.18e-10
ABCA1	CPSF6	0.005713	1.652e-15
ABCA1	CREB1	5.431e-07	7.046e-18
ABCA1	CREB5	0.0009151	1.403e-10
ABCA1	CREBRF	0.0002315	4.383e-19
ABCA1	CRIM1	0.00453	1.349e-12
ABCA1	CRK	0.005677	4.456e-10
ABCA1	CSF1	0.002461	6.749e-06
ABCA1	CSRP2	0.001572	6.418e-09
ABCA1	CUL3	2.916e-07	1.228e-06
ABCA1	CXCL12	0.002043	2.701e-14
ABCA1	CYB5R4	0.001704	5.075e-14
ABCA1	DAB2	0.008942	5.031e-14
ABCA1	DAZAP2	0.008626	2.369e-14
ABCA1	DCBLD2	3.147e-07	1.179e-06
ABCA1	DDX5	0.0052	3.104e-07
ABCA1	DENND4C	3.309e-06	2.837e-09
ABCA1	DENND5B	0.003493	5.86e-06
ABCA1	DIRC2	3.306e-05	1.477e-06
ABCA1	DLC1	1.165e-05	3.699e-17
ABCA1	DMRTA2	0.001811	7.62e-06
ABCA1	DMTF1	0.0007394	3.694e-06
ABCA1	DNAJB9	0.001128	4.387e-08
ABCA1	DNAJC16	0.001152	2.864e-09
ABCA1	DOCK11	0.001258	6.832e-17
ABCA1	DOCK3	0.005103	2.137e-08
ABCA1	DRD1	2.192e-05	9.466e-07
ABCA1	DYNC1LI2	0.002824	1.356e-13
ABCA1	DYRK2	0.004817	1.553e-22
ABCA1	E2F1	0.003256	7.632e-06
ABCA1	E2F2	7.381e-05	4.255e-06
ABCA1	E2F3	0.0002699	6.572e-10
ABCA1	E2F5	4.113e-05	4.379e-08
ABCA1	E2F8	0.008771	5.034e-06
ABCA1	EBF3	3.822e-05	2.265e-12
ABCA1	EDN1	0.004599	5.152e-06
ABCA1	EFNA5	1.977e-07	7.775e-08
ABCA1	EFR3A	0.002941	7.583e-10
ABCA1	EGR3	0.0004866	1.193e-06
ABCA1	EIF2C1	0.0001316	1.556e-11
ABCA1	EIF4E3	0.0003208	7.181e-12
ABCA1	ELAVL2	1.126e-07	6.876e-06
ABCA1	ELK3	0.0002841	5.192e-17
ABCA1	EOGT	0.003362	5.563e-11
ABCA1	EPAS1	0.0001801	1.903e-09
ABCA1	EPS15	0.003681	3.019e-16
ABCA1	ERBB2IP	3.499e-05	1.361e-13
ABCA1	ERBB3	0.0009699	2.784e-06
ABCA1	ERBB4	1.747e-05	2.033e-11
ABCA1	ERI1	6.731e-06	5.395e-09
ABCA1	ESR1	9.8e-06	3.888e-08
ABCA1	ETNK1	0.001017	1.036e-08
ABCA1	EYA4	0.000928	4.69e-08
ABCA1	EZH1	0.0005602	3.98e-07
ABCA1	FAM102A	0.0009699	1.907e-06
ABCA1	FAM107B	2.207e-05	5.872e-06
ABCA1	FAM117A	0.001401	4.773e-06
ABCA1	FAM123A	0.002461	9.643e-08
ABCA1	FAM168B	0.004836	1.451e-06
ABCA1	FAM178A	0.00866	2.133e-12
ABCA1	FAM60A	2.353e-05	1.63e-11
ABCA1	FAT3	0.0001575	1.189e-14
ABCA1	FBXO10	6.766e-05	4.525e-11
ABCA1	FBXO28	1.1e-05	2.085e-07
ABCA1	FBXW11	1.821e-05	5.254e-19
ABCA1	FCHO1	0.005922	6.486e-08
ABCA1	FERMT2	0.00107	4.45e-13
ABCA1	FGD4	6.124e-05	4.079e-11
ABCA1	FIBIN	0.0007322	6.466e-09
ABCA1	FIGN	0.009292	1.534e-10
ABCA1	FILIP1L	0.0003994	7.083e-12
ABCA1	FN1	0.008402	3.376e-11
ABCA1	FNBP4	1.733e-05	1.915e-06
ABCA1	FNDC3A	9.933e-06	3.205e-22
ABCA1	FNDC3B	6.265e-05	6.926e-13
ABCA1	FOXF1	0.0001884	5.446e-07
ABCA1	FOXF2	2.904e-05	6.267e-06
ABCA1	FOXP1	0.0005697	8.55e-13
ABCA1	FRMD4A	9.996e-05	7.674e-12
ABCA1	FRMD4B	0.005722	5.747e-09
ABCA1	FRMD6	9.476e-05	4.235e-12
ABCA1	FRS2	0.007046	3.036e-11
ABCA1	FYCO1	1.591e-06	5.114e-11
ABCA1	G3BP2	0.0002531	8.897e-13
ABCA1	GABPB1	0.0008031	6.344e-07
ABCA1	GAS1	0.006767	1.242e-06
ABCA1	GDF11	0.004294	1.598e-08
ABCA1	GIT2	0.0003797	7.201e-16
ABCA1	GLIS2	0.009336	2.237e-09
ABCA1	GMCL1	0.001736	2.181e-09
ABCA1	GMFB	2.152e-05	6.148e-11
ABCA1	GNPDA2	0.0006538	6.742e-06
ABCA1	GNS	1.729e-05	2.17e-13
ABCA1	GPC6	0.003216	4.705e-12
ABCA1	GPCPD1	6.067e-05	2.373e-06
ABCA1	GPM6A	6.056e-05	1.529e-06
ABCA1	GPR137B	0.007355	1.446e-08
ABCA1	GPR137C	0.001399	7.805e-06
ABCA1	GPR158	9.524e-06	3.653e-07
ABCA1	GRIN3A	0.0001715	1.434e-11
ABCA1	GRM5	0.000232	2.763e-10
ABCA1	GSK3B	0.00117	1.992e-12
ABCA1	GUCY1A3	3.58e-07	2.391e-06
ABCA1	HBP1	9.483e-05	4.772e-11
ABCA1	HBS1L	0.001258	5.201e-07
ABCA1	HCFC2	0.004836	9.154e-17
ABCA1	HECTD2	0.0006395	4.167e-07
ABCA1	HEG1	0.00138	2.667e-15
ABCA1	HIAT1	8.573e-05	1.426e-17
ABCA1	HIF1A	0.003296	1.366e-09
ABCA1	HIVEP2	0.0007039	3.108e-11
ABCA1	HNRNPH3	0.0004494	1.613e-08
ABCA1	HOOK3	2.968e-07	3.262e-11
ABCA1	HOXD1	0.002461	4.082e-08
ABCA1	HOXD8	0.002745	4.341e-11
ABCA1	HS2ST1	0.003285	5.55e-14
ABCA1	HSPA8	3.449e-08	4.982e-14
ABCA1	HTR7	0.005345	7.385e-15
ABCA1	IGF1	0.001597	1.304e-15
ABCA1	IGFBP5	0.003145	2.023e-08
ABCA1	IGSF3	6.259e-05	1.228e-06
ABCA1	IKZF2	0.007954	9.719e-17
ABCA1	IKZF4	5.171e-05	1.858e-15
ABCA1	IL6ST	1.607e-05	5.004e-18
ABCA1	INO80	3.535e-06	4.83e-16
ABCA1	INTS6	0.001294	4.2e-07
ABCA1	IPO7	0.00112	1.225e-12
ABCA1	IPO8	0.000211	1.058e-12
ABCA1	IQGAP2	0.002398	5.254e-10
ABCA1	IQSEC1	4.113e-05	1.456e-10
ABCA1	IRF1	0.002328	1.167e-07
ABCA1	ITGA11	1.264e-05	4.327e-11
ABCA1	ITGA4	9.169e-05	1.464e-12
ABCA1	ITGA6	0.001766	1.442e-07
ABCA1	ITM2C	0.004701	1.369e-06
ABCA1	ITPR1	0.003138	1.262e-11
ABCA1	ITPRIPL2	0.0002076	2.642e-07
ABCA1	JAK1	0.0001565	2.056e-10
ABCA1	JAZF1	0.003144	1.387e-13
ABCA1	JMY	0.001356	1.233e-13
ABCA1	KANSL1	0.003358	2.148e-07
ABCA1	KAT6A	0.0002952	4.869e-15
ABCA1	KBTBD8	4.448e-05	2.31e-17
ABCA1	KCNE4	3.57e-05	2.515e-07
ABCA1	KCNK2	0.002306	4.418e-06
ABCA1	KIAA0240	0.0001066	1.748e-10
ABCA1	KIAA0319L	6.405e-06	6.23e-06
ABCA1	KIAA0947	0.008765	3.439e-12
ABCA1	KIAA1217	0.005121	2.752e-11
ABCA1	KIAA1462	0.0001174	2.415e-14
ABCA1	KIAA1468	0.0002043	3.807e-06
ABCA1	KIAA2018	0.001757	1.644e-13
ABCA1	KIAA2022	0.003414	1.62e-07
ABCA1	KIF13A	0.0001272	2.616e-08
ABCA1	KIF26B	0.0004022	3.28e-09
ABCA1	KIT	0.005006	1.469e-07
ABCA1	KLF10	0.0004531	1.046e-17
ABCA1	KLF12	0.003042	4.07e-19
ABCA1	KLF3	0.003758	2.121e-17
ABCA1	KLF4	6.847e-05	9.649e-07
ABCA1	KLHL2	2.523e-05	5.732e-10
ABCA1	KLHL28	0.002127	2.717e-22
ABCA1	KLHL3	0.002586	6.229e-09
ABCA1	KPNA2	2.837e-05	7.588e-06
ABCA1	KPNA3	9.042e-06	3.837e-12
ABCA1	KRAS	0.0003175	1.493e-16
ABCA1	L3MBTL3	0.004011	1.659e-09
ABCA1	LAMC1	0.0004688	2.186e-08
ABCA1	LAMP5	0.002705	7.287e-06
ABCA1	LARP4B	1.75e-06	1.653e-09
ABCA1	LBR	0.001113	2.373e-10
ABCA1	LCOR	2.247e-09	7.698e-18
ABCA1	LCORL	7.07e-06	5.669e-14
ABCA1	LEF1	0.004031	1.81e-09
ABCA1	LHFP	0.0001544	7.292e-11
ABCA1	LMBR1L	0.0006131	3.867e-06
ABCA1	LRCH1	4.068e-07	6.58e-15
ABCA1	LRIG1	0.009526	8.524e-08
ABCA1	LRP12	0.0003953	7.159e-14
ABCA1	LRP4	1.05e-08	5.414e-08
ABCA1	LRP6	0.006107	2.804e-13
ABCA1	LYPD6	5.08e-06	3.444e-06
ABCA1	LYSMD3	4.886e-09	6.635e-16
ABCA1	MAGI1	0.0001391	1.995e-14
ABCA1	MAML1	0.009736	1.393e-11
ABCA1	MAN2A1	0.002054	3.971e-17
ABCA1	MAP1B	0.00745	3.466e-14
ABCA1	MAP3K1	0.001856	8.694e-16
ABCA1	MAP3K14	5.137e-09	1.193e-07
ABCA1	MAP3K2	0.0009835	1.102e-14
ABCA1	MAP3K5	3.047e-05	2.072e-10
ABCA1	MAP3K7	0.004836	1.404e-08
ABCA1	MAP4K3	0.001006	1.525e-08
ABCA1	MAP4K4	4.769e-05	4.088e-16
ABCA1	MARCH1	0.0009246	5.716e-16
ABCA1	MARCH6	0.0004013	2.037e-10
ABCA1	MARCH8	0.0006347	5.517e-08
ABCA1	MARK1	0.001186	5.409e-06
ABCA1	MASTL	2.614e-07	7.546e-10
ABCA1	MAT2B	0.004836	7.187e-16
ABCA1	MBNL3	3.494e-06	9.06e-13
ABCA1	MCL1	1.865e-05	6.409e-11
ABCA1	MECOM	0.009947	4.935e-15
ABCA1	MEOX2	0.008558	1.73e-07
ABCA1	MET	0.001246	1.701e-08
ABCA1	MEX3C	0.009633	3.048e-11
ABCA1	MFN2	0.002652	1.762e-06
ABCA1	MGEA5	2.596e-05	8.582e-10
ABCA1	MIER3	2.824e-08	2.8e-20
ABCA1	MKL2	0.0001319	3.84e-12
ABCA1	MLEC	0.0004634	4.974e-06
ABCA1	MLL	4.188e-05	4.388e-07
ABCA1	MLL5	0.008357	2.862e-07
ABCA1	MLLT10	0.001157	1.137e-10
ABCA1	MTF1	1.837e-05	7.632e-19
ABCA1	MTMR12	0.006767	1.033e-11
ABCA1	MTMR2	0.0005099	3.216e-07
ABCA1	MTMR6	0.001869	9.752e-11
ABCA1	MTMR9	0.0002963	8.652e-08
ABCA1	MYBL1	0.003388	7.88e-07
ABCA1	MYO10	0.0003468	1.523e-07
ABCA1	MYOCD	0.0002722	5.839e-07
ABCA1	MYT1L	2.613e-05	7.314e-07
ABCA1	NAA16	2.885e-05	7.398e-08
ABCA1	NABP1	0.002157	1.801e-06
ABCA1	NAP1L3	0.004041	4.968e-06
ABCA1	NAV3	0.008279	8.614e-09
ABCA1	NBEA	0.009547	2.473e-14
ABCA1	NCOA3	1.931e-05	1.056e-13
ABCA1	NCOA7	3.574e-05	1.059e-10
ABCA1	NEK9	0.0001593	3.052e-12
ABCA1	NFATC3	0.009699	4.871e-11
ABCA1	NFIA	0.00031	6.172e-06
ABCA1	NFIB	0.001218	7.645e-12
ABCA1	NHS	0.001135	3.142e-11
ABCA1	NKX3-2	1.612e-06	6.552e-10
ABCA1	NOL4	1.917e-06	3.056e-09
ABCA1	NPAT	4.389e-05	3.161e-17
ABCA1	NPC1	0.0002889	4.231e-14
ABCA1	NR1D2	0.002124	7.064e-10
ABCA1	NR4A2	0.003042	3.54e-06
ABCA1	NR4A3	7.963e-05	1.527e-06
ABCA1	NR5A2	0.009577	8.48e-16
ABCA1	NRBF2	7.833e-05	4.721e-14
ABCA1	NRP1	0.006229	2.218e-14
ABCA1	NRP2	3.348e-06	3.779e-13
ABCA1	NUFIP2	0.0002994	2.132e-23
ABCA1	NUMB	0.0001682	9.123e-10
ABCA1	NUP205	0.005948	7.313e-06
ABCA1	NUS1	0.002984	4.812e-15
ABCA1	NXPH1	0.006634	3.377e-06
ABCA1	ODZ1	0.0009477	2.007e-07
ABCA1	OGDH	0.001869	1.14e-06
ABCA1	OSBPL10	0.008162	3.694e-06
ABCA1	OSTM1	0.0003063	1.364e-10
ABCA1	OTUD1	1.954e-05	7.677e-11
ABCA1	OTUD3	0.0009699	1.493e-06
ABCA1	OTUD4	2.354e-06	2.17e-20
ABCA1	OXR1	0.0009896	2.468e-14
ABCA1	PAFAH1B1	0.000191	4.725e-14
ABCA1	PAK7	0.001799	1.609e-09
ABCA1	PALLD	0.003753	1.215e-13
ABCA1	PAN3	0.0009227	2.803e-12
ABCA1	PBX3	2.563e-06	7.417e-08
ABCA1	PCNX	0.002398	5.044e-18
ABCA1	PDE7B	0.0001416	9.003e-09
ABCA1	PDGFRA	6.101e-05	9.38e-19
ABCA1	PDIK1L	9.681e-07	2.331e-12
ABCA1	PFKP	7.071e-08	8.836e-07
ABCA1	PFN2	4.38e-05	8.715e-06
ABCA1	PGBD5	0.005793	1.513e-09
ABCA1	PHAX	9.169e-05	1.271e-08
ABCA1	PHF6	1.387e-06	1.118e-12
ABCA1	PIGA	0.007679	4.229e-08
ABCA1	PIK3C2A	2.227e-05	1.768e-13
ABCA1	PIP4K2A	0.008402	9.289e-08
ABCA1	PJA2	0.00176	1.533e-20
ABCA1	PKD1	0.0009041	2.265e-06
ABCA1	PKD2	0.0004504	1.801e-11
ABCA1	PKN2	4.349e-05	5.523e-13
ABCA1	PLAG1	0.005257	2.734e-09
ABCA1	PLCB1	0.0007251	5.033e-13
ABCA1	PLCL1	0.0007424	2.325e-08
ABCA1	PLEKHA3	0.003723	1.957e-07
ABCA1	PLEKHM1	0.00138	2.862e-08
ABCA1	PODXL	0.003014	1.77e-07
ABCA1	POLQ	0.0001952	5.231e-08
ABCA1	POLR3G	1.651e-05	4.054e-08
ABCA1	PPARGC1B	0.0001375	1.206e-13
ABCA1	PPFIA2	0.0005602	3.77e-13
ABCA1	PPM1G	0.00381	2.593e-07
ABCA1	PPP1R15B	0.002268	4.632e-12
ABCA1	PPP2R2A	9.163e-06	1.387e-11
ABCA1	PPP6R3	1.359e-05	1.27e-08
ABCA1	PRDM10	7.091e-05	2.729e-13
ABCA1	PRKAA1	0.0002717	2.187e-09
ABCA1	PRKACB	6.513e-05	1.868e-13
ABCA1	PRKD3	0.0003063	2.472e-15
ABCA1	PRR5L	0.0001316	3.028e-12
ABCA1	PRRG1	0.008706	1.443e-08
ABCA1	PRRX1	0.002303	4.651e-16
ABCA1	PSD3	0.003162	1.177e-06
ABCA1	PSEN1	1.02e-05	2.36e-08
ABCA1	PTBP3	0.0001874	1.174e-13
ABCA1	PTEN	0.005939	2.385e-12
ABCA1	PTK2	0.001221	4.429e-06
ABCA1	PTPDC1	0.006776	1.548e-07
ABCA1	PTPN2	0.0006736	1.026e-12
ABCA1	PTPN4	0.001547	4.63e-13
ABCA1	PTPRD	0.001194	6.177e-11
ABCA1	PURB	3.501e-05	1.817e-07
ABCA1	PWWP2A	0.003707	8.009e-18
ABCA1	PXDN	0.002349	2.002e-06
ABCA1	QSER1	0.0003765	1.772e-13
ABCA1	RAB21	0.005381	7.901e-06
ABCA1	RABEP1	8.634e-05	6.624e-07
ABCA1	RABGAP1	3.118e-07	1.435e-07
ABCA1	RACGAP1	4.075e-05	3.141e-09
ABCA1	RAD51B	0.003164	6.216e-06
ABCA1	RAP1B	0.00325	1.176e-13
ABCA1	RAP2C	0.0002466	1.067e-12
ABCA1	RAPGEF2	0.0001053	4.033e-14
ABCA1	RARB	0.001411	3.2e-06
ABCA1	RASSF2	0.004701	1.253e-10
ABCA1	RB1	0.004486	2.095e-12
ABCA1	RB1CC1	0.001353	3.802e-20
ABCA1	RBL1	0.001023	1.567e-09
ABCA1	RBL2	3.278e-06	3.247e-14
ABCA1	RBM24	0.009984	2.396e-07
ABCA1	RBM25	0.00357	5.736e-08
ABCA1	RBM47	0.006136	2.274e-07
ABCA1	RBMS2	0.004359	1.955e-10
ABCA1	RCOR1	0.001004	2.13e-11
ABCA1	RECK	0.0004317	2.144e-12
ABCA1	REEP3	0.0007604	5.643e-07
ABCA1	RERG	0.002623	1.368e-06
ABCA1	RET	9.476e-05	1.722e-06
ABCA1	REV3L	0.002001	2.075e-12
ABCA1	RFX7	0.0005339	7.086e-18
ABCA1	RGL1	5.051e-05	1.544e-12
ABCA1	RGMA	2.05e-07	1.635e-07
ABCA1	RHOT1	0.000468	3.691e-06
ABCA1	RICTOR	0.0009597	2.612e-18
ABCA1	RIN2	0.004788	1.257e-08
ABCA1	RLIM	2.267e-07	2.883e-15
ABCA1	RNF138	0.003138	4.592e-07
ABCA1	RNF145	0.0001172	2.585e-12
ABCA1	RNF219	0.0006124	1.097e-07
ABCA1	RNF24	0.008619	3.338e-11
ABCA1	RNF38	1.822e-06	1.379e-10
ABCA1	ROBO1	0.002135	4.984e-12
ABCA1	ROCK2	3.739e-05	1.182e-13
ABCA1	RORA	5.031e-05	4.572e-18
ABCA1	RPS6KA5	3.751e-08	4.95e-10
ABCA1	RPS6KB1	0.001186	1.793e-11
ABCA1	RRAGD	6.824e-07	2.139e-12
ABCA1	RSBN1L	9.447e-05	7.371e-06
ABCA1	RSF1	0.0002064	1.36e-11
ABCA1	RSRC2	6.067e-05	5.177e-09
ABCA1	RTN1	0.0001013	2.326e-10
ABCA1	RUFY2	0.0001176	1.077e-12
ABCA1	RUNX2	0.0002257	7.524e-16
ABCA1	RUNX3	5.948e-05	1.773e-10
ABCA1	RYBP	0.008742	3.818e-06
ABCA1	S1PR1	0.0008375	5.862e-07
ABCA1	SAMD12	0.002984	2.653e-08
ABCA1	SAR1B	1.387e-06	6.983e-07
ABCA1	SATB2	0.008648	1.073e-09
ABCA1	SBF2	0.0002563	8.95e-08
ABCA1	SCML2	3.688e-06	1.209e-12
ABCA1	SCML4	0.0001475	4.48e-08
ABCA1	SCN1A	0.008112	2.054e-07
ABCA1	SCN2A	4.852e-05	8.547e-09
ABCA1	SCN3A	0.008775	2.702e-14
ABCA1	SECISBP2L	0.005231	2.912e-15
ABCA1	SEL1L3	0.007803	6.377e-12
ABCA1	SEMA6D	0.008316	4.825e-14
ABCA1	SEMA7A	0.001385	7.657e-07
ABCA1	SEPHS1	0.006794	6.549e-10
ABCA1	SERINC3	0.007355	2.371e-14
ABCA1	SERTAD2	0.005874	5.334e-08
ABCA1	SETD7	0.003993	1.225e-12
ABCA1	SFRP2	0.00323	6.493e-07
ABCA1	SGCD	0.0003797	1.775e-12
ABCA1	SGMS1	5.889e-05	1.789e-06
ABCA1	SGTB	0.004701	1.468e-15
ABCA1	SIK1	6.221e-07	1.284e-07
ABCA1	SIM1	0.00256	2.358e-06
ABCA1	SIRPA	0.008162	4.058e-10
ABCA1	SKI	0.00786	3.959e-10
ABCA1	SKIDA1	0.00118	8.684e-07
ABCA1	SLAIN1	0.006096	8.903e-06
ABCA1	SLC16A6	0.001356	1.041e-07
ABCA1	SLC24A2	9.687e-05	8.49e-15
ABCA1	SLC25A36	0.002398	1.02e-06
ABCA1	SLC33A1	3.197e-06	4.14e-12
ABCA1	SLC35F5	1.408e-05	7.703e-12
ABCA1	SLC38A2	3.303e-06	5.964e-12
ABCA1	SLC39A10	0.001746	3.116e-06
ABCA1	SLC39A6	0.001037	9.132e-09
ABCA1	SLC4A4	0.006259	4.123e-06
ABCA1	SLC6A6	0.002604	1.08e-13
ABCA1	SLITRK4	0.001327	1.934e-07
ABCA1	SLK	0.006705	5.83e-16
ABCA1	SLMAP	0.001176	5.594e-10
ABCA1	SMAD1	0.007826	5.054e-09
ABCA1	SMAD4	0.0009835	3.941e-11
ABCA1	SMAD5	0.002116	1.037e-15
ABCA1	SMARCAD1	0.003549	4.436e-09
ABCA1	SMOC2	0.0002039	3.397e-09
ABCA1	SNIP1	7.204e-06	1.627e-07
ABCA1	SNTB2	1.819e-05	2.36e-13
ABCA1	SNX2	0.0008683	8.531e-17
ABCA1	SOCS5	0.0003795	2.905e-10
ABCA1	SOCS6	9.43e-06	4.395e-09
ABCA1	SOX11	0.004569	6.122e-11
ABCA1	SOX6	0.0003718	3.336e-11
ABCA1	SP1	0.0005912	6.516e-19
ABCA1	SP2	0.005041	8.506e-09
ABCA1	SPIRE1	0.0008255	8.155e-07
ABCA1	SPOPL	0.0002092	1.252e-11
ABCA1	SPRED1	0.0002369	8.815e-19
ABCA1	SPTY2D1	0.003789	1.824e-12
ABCA1	SRGAP1	0.007679	9.075e-08
ABCA1	SRPX	0.0004898	4.09e-09
ABCA1	SRSF12	0.0016	1.32e-09
ABCA1	ST18	0.001941	2.918e-13
ABCA1	ST6GALNAC3	0.005753	2.396e-07
ABCA1	STAG1	0.00937	6.304e-17
ABCA1	STX12	0.004336	2.095e-13
ABCA1	STX7	0.0009611	3.907e-10
ABCA1	STYX	0.00148	5.291e-09
ABCA1	SULF1	3.885e-05	8.323e-07
ABCA1	SUN1	0.006329	1.84e-08
ABCA1	SUV420H1	0.001678	1.17e-07
ABCA1	SUZ12	0.006819	1.89e-09
ABCA1	SYDE1	0.0002963	1.021e-06
ABCA1	SYNCRIP	0.0001048	6.147e-20
ABCA1	TAB3	0.0001374	1.564e-10
ABCA1	TAGAP	0.001113	1.279e-11
ABCA1	TAL1	0.0003538	5.386e-06
ABCA1	TANC1	2.371e-07	5.736e-06
ABCA1	TANC2	0.0003468	5.329e-10
ABCA1	TARDBP	0.0005643	3.451e-07
ABCA1	TBC1D15	0.001356	1.128e-10
ABCA1	TBC1D20	0.0004022	2.675e-06
ABCA1	TBC1D8	1.558e-07	5.842e-06
ABCA1	TBL1XR1	0.007312	6.505e-12
ABCA1	TCF4	0.0005022	4.003e-23
ABCA1	TCF7L2	0.001433	1.769e-07
ABCA1	TEAD1	0.0005724	3.912e-18
ABCA1	TES	0.008619	7.735e-06
ABCA1	TET2	8.28e-05	3.913e-17
ABCA1	TET3	0.0001797	1.303e-12
ABCA1	TEX2	0.0006419	9.529e-07
ABCA1	TGFB2	0.0003349	1.869e-08
ABCA1	TGFBR1	0.003036	1.247e-15
ABCA1	TGFBR2	6.124e-05	3.222e-18
ABCA1	TGFBR3	0.002444	2.002e-08
ABCA1	TIAM1	0.0009805	7.106e-07
ABCA1	TIMP2	0.0002047	5.499e-13
ABCA1	TIMP3	0.0009028	4.739e-10
ABCA1	TMCC1	5.806e-05	1.488e-09
ABCA1	TMEM123	0.0002272	2.96e-07
ABCA1	TMEM170B	2.548e-06	1.544e-09
ABCA1	TMEM236	0.006481	3.735e-07
ABCA1	TMEM25	0.001317	5.89e-07
ABCA1	TNFRSF21	0.0001853	8.224e-10
ABCA1	TNKS2	4.702e-07	2.177e-13
ABCA1	TNRC6A	0.002173	3.488e-08
ABCA1	TNRC6C	0.009598	3.239e-06
ABCA1	TP63	0.0005643	5.173e-07
ABCA1	TRAM1	0.007428	5.127e-11
ABCA1	TRIM2	0.0001393	4.475e-08
ABCA1	TRIM37	0.008956	3.385e-08
ABCA1	TRIM44	0.005796	7.952e-09
ABCA1	TRIP11	0.0003026	2.711e-10
ABCA1	TSC22D2	0.001193	2.878e-09
ABCA1	TSHZ2	0.007404	6.767e-19
ABCA1	TTC28	0.008765	2.458e-08
ABCA1	TTC9	0.006329	8.953e-06
ABCA1	TWF1	6.378e-05	3.395e-06
ABCA1	UBE2D1	0.0005017	4.57e-12
ABCA1	UBE2D3	0.0005801	5.944e-07
ABCA1	UBE2W	5.685e-06	3.152e-18
ABCA1	UBR1	0.008942	2.519e-15
ABCA1	ULK2	0.006329	4.862e-07
ABCA1	UNKL	0.004788	4.834e-08
ABCA1	USP25	4.285e-05	9.361e-10
ABCA1	USP32	0.0001577	3.564e-14
ABCA1	USP34	0.00412	4.219e-08
ABCA1	USP46	2.679e-07	1.905e-11
ABCA1	USP53	0.001428	1.736e-07
ABCA1	USP6NL	0.001836	1.526e-09
ABCA1	USP9X	0.001027	3.629e-16
ABCA1	VEZF1	0.0008918	3.002e-10
ABCA1	VPS26A	0.007596	6.342e-09
ABCA1	WDFY3	0.006832	1.992e-15
ABCA1	WDR20	7.427e-05	7.291e-08
ABCA1	WDR47	0.00157	1.424e-15
ABCA1	WDR7	0.000155	2.223e-09
ABCA1	WEE1	4.778e-07	2.127e-06
ABCA1	WNK1	9.726e-06	6.18e-10
ABCA1	WNK3	0.0001328	3.295e-18
ABCA1	XPO5	0.00323	1.24e-06
ABCA1	XRN2	0.009321	1.064e-10
ABCA1	YPEL2	3.739e-05	1.362e-06
ABCA1	YTHDF3	0.001389	7.995e-18
ABCA1	ZBTB41	0.009321	7.505e-06
ABCA1	ZBTB5	0.0002549	1.591e-08
ABCA1	ZBTB6	4.495e-05	8.275e-10
ABCA1	ZC3H12C	2.253e-08	4.718e-17
ABCA1	ZCCHC14	0.004599	3.196e-13
ABCA1	ZCCHC24	0.0004237	1.878e-14
ABCA1	ZDHHC2	0.003823	5.491e-10
ABCA1	ZDHHC9	0.003162	7.524e-06
ABCA1	ZEB1	0.005255	1.808e-17
ABCA1	ZFHX4	0.0001532	2.356e-14
ABCA1	ZFP91	1.066e-06	2.684e-12
ABCA1	ZFPM2	4.49e-07	1.207e-18
ABCA1	ZFYVE26	2.163e-06	1.423e-13
ABCA1	ZHX1	0.0009955	1.456e-07
ABCA1	ZNF148	0.0009848	1.377e-11
ABCA1	ZNF217	1.149e-06	1.93e-11
ABCA1	ZNF236	1.14e-05	1.678e-10
ABCA1	ZNF292	0.003753	9.582e-13
ABCA1	ZNF503	0.000572	8.885e-10
ABCA1	ZNF532	1.04e-05	2.656e-13
ABCA1	ZNF652	0.003285	5.43e-06
ABCA1	ZNF697	0.007679	8.194e-09
ABCA1	ZNF704	0.00381	8.388e-12
ABCA1	ZNF800	3.19e-05	1.481e-15
ABCA1	ZNFX1	2.925e-06	7.102e-15
ABCA12	RBMS1	0.005938	4.053e-06
ABCA12	WWP1	2.128e-05	6.698e-06
ABCA2	DIAPH1	0.004405	8.274e-06
ABCA2	ZNF318	0.006006	1.377e-07
ABCB10	NEK7	0.002811	9.261e-12
ABCB10	SGMS1	0.003456	3.284e-07
ABCB5	ACVR1C	0.009713	4.932e-07
ABCB5	C8orf4	0.001001	1.676e-06
ABCB5	CLMP	0.0002357	8.161e-06
ABCB5	DKK1	0.008813	4.666e-06
ABCB5	F3	0.003041	1.211e-06
ABCB5	FAM81A	0.00297	1.992e-06
ABCB5	FOXD1	0.006393	3.939e-06
ABCB5	HEG1	0.001035	5.646e-06
ABCB5	KIAA1462	0.0001288	6.432e-08
ABCB5	MAML1	0.006833	9.768e-06
ABCB5	MOB3B	0.0009097	1.187e-06
ABCB5	NPTX1	0.001374	1.185e-06
ABCB5	PLCL2	0.00281	1.68e-06
ABCB5	S1PR2	0.0006562	3.617e-06
ABCB5	SCN9A	0.003295	3.669e-07
ABCB5	SRPX	0.001126	5.591e-06
ABCB6	NID1	0.006308	8.445e-06
ABCB6	ZNF346	1.161e-06	2.94e-07
ABCB7	CAP1	0.001355	9.433e-06
ABCB7	CLCN3	0.003118	8.326e-08
ABCB7	DHX15	0.0005591	3.038e-07
ABCB7	ETNK1	0.0008866	6.388e-08
ABCB7	IPO8	0.007251	9.777e-08
ABCB7	PHAX	0.0002862	1.804e-06
ABCB7	PIK3C2A	0.00343	8.881e-08
ABCB7	SNX2	0.0003189	3.434e-06
ABCB7	STX12	7.795e-05	1.616e-06
ABCC10	ANKRA2	1.129e-05	6.438e-09
ABCC10	ARHGAP20	0.000565	2.021e-06
ABCC10	ARID3B	7.368e-06	4.638e-07
ABCC10	ATAD2B	0.002778	1.053e-07
ABCC10	AURKB	1.506e-09	2.787e-07
ABCC10	BEND6	0.00133	1.357e-06
ABCC10	BTF3L4	0.0004877	2.708e-06
ABCC10	C11orf84	5.767e-07	4.219e-06
ABCC10	C20orf194	7.776e-05	6.576e-06
ABCC10	C6orf211	1.161e-08	1.882e-06
ABCC10	CEP135	2.063e-06	8.822e-06
ABCC10	CHD4	0.0006811	3.565e-06
ABCC10	CHRD	5.616e-05	3.052e-07
ABCC10	COL14A1	2.034e-10	3.288e-06
ABCC10	COL4A6	2.597e-06	2.574e-06
ABCC10	DDN	2.823e-06	9.808e-07
ABCC10	DDX19A	2.034e-10	2.919e-10
ABCC10	DICER1	0.006336	6.26e-07
ABCC10	EIF2C3	0.0008984	2.926e-06
ABCC10	ERGIC1	0.0001333	1.176e-06
ABCC10	FAF1	1.262e-05	5.613e-06
ABCC10	FAM135A	0.00522	1.734e-07
ABCC10	FBXL19	0.002678	2.063e-06
ABCC10	FBXO30	5.935e-07	2.082e-06
ABCC10	FNDC3A	0.0008902	2.947e-07
ABCC10	FNTB	3.054e-05	7.964e-06
ABCC10	GABBR2	0.0002731	3.766e-06
ABCC10	GALC	6.977e-09	3.537e-07
ABCC10	GGA3	5.781e-06	1.053e-07
ABCC10	GTF2I	2.392e-05	9.103e-06
ABCC10	HMGA1	0.0007579	5.145e-07
ABCC10	ITGB8	8.751e-05	5.624e-06
ABCC10	KCTD21	1.677e-06	3.58e-06
ABCC10	LRIG1	0.003625	2.307e-06
ABCC10	MAP4K4	0.001534	4.401e-06
ABCC10	MDFI	5.781e-06	4.068e-10
ABCC10	MEX3A	0.001073	1.103e-06
ABCC10	MFAP3L	0.0001067	4.029e-06
ABCC10	MIB1	1.132e-06	2.453e-06
ABCC10	MLLT10	0.0001507	5.146e-07
ABCC10	MTUS1	0.0002266	4.193e-06
ABCC10	MYO1F	2.193e-09	1.506e-08
ABCC10	NCK2	0.0006931	3.523e-06
ABCC10	NEK9	0.009234	2.69e-08
ABCC10	NNT	6.288e-05	4.957e-06
ABCC10	NPHP3	6.977e-09	4.103e-06
ABCC10	PARP8	0.004389	5.583e-06
ABCC10	PBX2	0.0002942	2.111e-11
ABCC10	PCGF3	0.0007069	3.939e-06
ABCC10	PRPF38B	0.0005638	1.374e-06
ABCC10	PRRX1	0.004011	2.564e-06
ABCC10	RB1	0.0005178	7.377e-06
ABCC10	RUFY3	0.0001575	2.278e-07
ABCC10	RUNX1T1	0.00996	1.11e-07
ABCC10	S100A8	1.249e-07	2.455e-06
ABCC10	SAP30L	3.688e-06	4.722e-06
ABCC10	SBNO1	0.001591	3.815e-06
ABCC10	SEMA4C	0.001498	2.899e-09
ABCC10	SREK1	0.008416	6.244e-06
ABCC10	SREK1IP1	0.006042	1.686e-06
ABCC10	TEAD3	0.0002699	5.402e-07
ABCC10	TET2	0.007278	1.706e-06
ABCC10	TIA1	0.0006792	5.066e-08
ABCC10	TMEM65	1.822e-06	9.817e-06
ABCC10	YPEL2	0.0006931	3.88e-06
ABCC10	ZFYVE16	8.81e-07	5.364e-06
ABCC10	ZNF318	2.045e-06	2.017e-11
ABCC10	ZNF689	7.131e-08	4.016e-06
ABCC4	CBFB	0.003104	4.241e-07
ABCC4	CEP112	0.0005231	8.065e-10
ABCC4	FAM65B	0.003131	2.137e-08
ABCC4	HOXA13	0.005545	1.242e-06
ABCC4	LIPA	0.007454	8.715e-06
ABCC4	NR5A2	0.004302	2.837e-08
ABCC4	PRKD1	0.001321	6.21e-12
ABCC4	RGPD3	0.002778	9.389e-06
ABCC4	RPIA	0.004357	6.104e-07
ABCC4	SMAD9	0.002772	7.434e-07
ABCC4	STAC	0.003131	1.292e-07
ABCC4	TFPI	0.009676	3.455e-06
ABCC5	ABL2	0.0006118	7.875e-06
ABCC5	ACSL4	0.005161	4.316e-08
ABCC5	ACTL6A	0.00905	1.595e-07
ABCC5	AMMECR1L	0.003354	2.338e-09
ABCC5	ANKRA2	0.005342	6.315e-08
ABCC5	ANKRD50	0.001214	1.345e-10
ABCC5	ANKRD52	0.006552	9.093e-07
ABCC5	ASAP1	0.001353	7.88e-08
ABCC5	ATAD2B	1.008e-06	6.967e-07
ABCC5	ATP13A3	0.00542	4.804e-07
ABCC5	BCL2L1	0.007882	2.336e-08
ABCC5	BCL7A	0.00419	3.682e-06
ABCC5	BRWD1	0.002424	1.471e-10
ABCC5	BRWD3	0.0004515	9.979e-09
ABCC5	C20orf20	0.001737	3.727e-06
ABCC5	CAPRIN2	0.001428	1.981e-08
ABCC5	CCDC85A	0.008728	1.59e-06
ABCC5	CDYL	0.001143	2.898e-07
ABCC5	CELF1	0.001589	5.984e-09
ABCC5	CEP120	7.059e-08	6.54e-14
ABCC5	CHRD	0.004133	6.105e-07
ABCC5	CHSY3	0.007786	2.822e-09
ABCC5	CNOT4	0.008178	4.896e-08
ABCC5	CNOT6L	4.252e-05	2.396e-06
ABCC5	COL14A1	0.0007375	3.397e-06
ABCC5	COL1A1	0.0008562	2.007e-09
ABCC5	COL1A2	0.008921	1.091e-07
ABCC5	COL3A1	0.009706	9.174e-09
ABCC5	CPEB2	0.001467	1.27e-10
ABCC5	CPEB3	7.375e-06	1.854e-07
ABCC5	CPEB4	0.006086	6.476e-07
ABCC5	CPED1	0.000461	5.926e-06
ABCC5	DAPK1	1.87e-06	2.686e-08
ABCC5	DICER1	0.00988	7.096e-12
ABCC5	DLC1	3.107e-05	4.749e-15
ABCC5	DMD	1.546e-05	2.695e-10
ABCC5	DNAL1	0.0006266	5.222e-08
ABCC5	DR1	0.00699	2.337e-06
ABCC5	DUSP7	0.008711	9.656e-06
ABCC5	DVL3	0.009111	5.112e-10
ABCC5	E2F5	0.004006	8.949e-08
ABCC5	ERCC4	0.009909	8.973e-07
ABCC5	ERGIC1	0.006878	1.575e-07
ABCC5	ERLIN1	0.008783	1.066e-07
ABCC5	ETNK1	0.001994	2.351e-07
ABCC5	FAM178A	1.271e-07	1.75e-12
ABCC5	FAM49B	0.0001569	5.055e-06
ABCC5	FNIP1	0.002428	4.997e-08
ABCC5	FOXP1	0.0008156	1.994e-08
ABCC5	GOLT1B	0.0006536	1.419e-06
ABCC5	HAND2	0.005657	6.338e-09
ABCC5	HAS2	0.005417	9.282e-09
ABCC5	HCFC2	0.0003118	1.99e-10
ABCC5	HOXA1	0.006962	1.575e-07
ABCC5	IGF1	0.002253	4.748e-09
ABCC5	IPO11	0.008783	7.59e-09
ABCC5	ITGB8	0.0006896	4.117e-06
ABCC5	ITSN1	0.0001807	9.745e-07
ABCC5	KCNQ4	0.004884	1.1e-06
ABCC5	LCOR	0.0005212	1.414e-13
ABCC5	LEPROTL1	4.917e-05	2.171e-06
ABCC5	LMLN	0.003445	6.527e-09
ABCC5	LOXL4	0.001671	4.021e-09
ABCC5	LRIG1	0.00621	1.944e-08
ABCC5	LRIG2	0.001747	4.142e-07
ABCC5	MAP3K1	0.002561	1.541e-07
ABCC5	MKL2	0.001994	4.721e-15
ABCC5	MOB4	0.0004547	1.739e-06
ABCC5	MPPED2	0.001837	9.352e-06
ABCC5	MTF2	0.006818	5.024e-07
ABCC5	MTMR12	1.155e-07	4.369e-09
ABCC5	NAA30	1.359e-06	7.332e-12
ABCC5	NAA50	0.006421	6.014e-09
ABCC5	NCOA1	0.008425	5.623e-07
ABCC5	PAX6	0.0009732	5.034e-07
ABCC5	PCDH19	0.0035	2.758e-09
ABCC5	PCGF3	0.00238	1.551e-06
ABCC5	PLCB1	0.00595	7.99e-07
ABCC5	POGZ	0.001368	4.903e-13
ABCC5	PRTG	0.001495	3.112e-08
ABCC5	PTP4A2	0.001709	4.836e-07
ABCC5	RAI2	0.0007326	4.975e-06
ABCC5	RASA1	0.0002704	1.087e-12
ABCC5	RNF38	0.005488	1.928e-06
ABCC5	ROCK1	0.002764	1.809e-08
ABCC5	RUFY2	0.003834	5.157e-06
ABCC5	SECISBP2L	0.008121	5.127e-07
ABCC5	SEMA4C	0.002418	2.269e-07
ABCC5	SEMA4F	0.00055	1.454e-07
ABCC5	SENP2	0.003252	7.952e-10
ABCC5	SLC16A10	0.007311	1.029e-08
ABCC5	SLC38A2	0.001754	1.191e-09
ABCC5	SLC4A7	0.0008624	7.319e-07
ABCC5	SOCS4	0.001245	2.808e-08
ABCC5	SOGA2	3.818e-05	6.64e-07
ABCC5	SOX4	5.007e-05	9.743e-09
ABCC5	SPIRE1	0.0005584	1.334e-07
ABCC5	SPOPL	0.00895	1.5e-12
ABCC5	STARD3NL	0.0005835	1.029e-06
ABCC5	STRAP	0.002649	5.658e-06
ABCC5	SYBU	0.005354	2.419e-06
ABCC5	TBC1D9	0.009902	7.516e-10
ABCC5	THBS1	0.001021	1.047e-09
ABCC5	TMEM41A	0.0004191	8.765e-06
ABCC5	TMEM65	0.0003389	9.513e-06
ABCC5	TMEM91	0.006846	3.575e-06
ABCC5	TNPO1	0.006601	4.13e-10
ABCC5	TP53	0.0005349	6.53e-06
ABCC5	TRAK2	0.002468	3.911e-06
ABCC5	TSC1	0.0001152	1.793e-08
ABCC5	UBAP2L	0.007323	7.185e-06
ABCC5	UHRF2	0.001249	2.14e-08
ABCC5	USP24	0.0009474	4.76e-08
ABCC5	USP38	0.0002702	1.779e-08
ABCC5	VCPIP1	0.006986	7.018e-08
ABCC5	XYLT1	0.002372	4.314e-06
ABCC5	YTHDF3	0.002685	3.577e-07
ABCC5	ZBTB10	0.008248	3.81e-06
ABCC5	ZCCHC24	0.001622	3.273e-08
ABCC5	ZCCHC8	0.009801	1.505e-08
ABCC5	ZFYVE16	0.001853	1.344e-08
ABCC5	ZIC5	1.837e-05	1.041e-07
ABCC5	ZNF516	0.0009582	5.896e-07
ABCC5	ZNF689	0.003064	4.179e-06
ABCC9	SCN9A	0.003032	6.134e-08
ABCD3	APC	0.009743	1.5e-14
ABCD3	ARHGAP12	0.005677	7.588e-06
ABCD3	CAND1	0.006142	2.428e-15
ABCD3	CS	0.003093	3.89e-13
ABCD3	DCP2	0.009511	3.609e-11
ABCD3	DENND4C	0.004252	3.337e-09
ABCD3	ELK3	0.007565	6.285e-08
ABCD3	HOMER1	0.002328	6.437e-09
ABCD3	LARS	0.002571	4.233e-06
ABCD3	OPA1	0.003888	6.046e-09
ABCD3	SLC30A5	0.007815	2.055e-10
ABCD3	UBR1	0.001259	3.369e-14
ABCD3	ZNF238	0.009195	6.048e-06
ABCE1	ACTR3	0.005177	4.49e-08
ABCE1	AMMECR1	0.0004921	6.648e-09
ABCE1	C17orf39	0.001661	3.685e-06
ABCE1	CAND1	0.007392	1.075e-14
ABCE1	CCNA2	0.0001055	2.614e-12
ABCE1	CREBBP	0.002211	5.362e-10
ABCE1	CSRNP2	0.002492	1.017e-07
ABCE1	DAG1	0.008487	2.201e-07
ABCE1	DCUN1D4	0.002416	9.783e-17
ABCE1	DENND4C	0.005003	8.852e-07
ABCE1	DOPEY1	8.554e-05	8.703e-06
ABCE1	FEM1B	0.001593	6.684e-06
ABCE1	GSK3B	0.004581	1.041e-09
ABCE1	HDAC4	0.0006631	1.863e-06
ABCE1	HEATR5A	0.003055	2.031e-07
ABCE1	HOMER1	0.007315	3.665e-07
ABCE1	IL1RAP	0.001913	6.024e-09
ABCE1	ITGA6	0.0007742	4.562e-07
ABCE1	JOSD1	0.006461	9.998e-07
ABCE1	KCTD20	0.003885	1.039e-06
ABCE1	KIAA0947	0.001334	2.075e-13
ABCE1	KIF11	0.001158	8.486e-07
ABCE1	LARP4B	0.004836	1.39e-06
ABCE1	LIN54	0.002657	8.206e-17
ABCE1	MAPKBP1	0.0001874	3.526e-06
ABCE1	METAP2	0.0004362	1.13e-11
ABCE1	MIER3	0.001965	2.05e-17
ABCE1	MORF4L1	0.001298	9.689e-13
ABCE1	NKRF	1.978e-05	6.6e-15
ABCE1	NOLC1	0.003894	1.362e-08
ABCE1	NUCKS1	0.0003144	5.021e-06
ABCE1	NUDT11	1.164e-05	4.654e-07
ABCE1	NUFIP2	0.007315	2.878e-21
ABCE1	OTUD4	0.001574	2.632e-21
ABCE1	PDS5B	0.00558	3.237e-09
ABCE1	PPM1B	0.008425	1.9e-11
ABCE1	PTBP3	0.002403	2.512e-13
ABCE1	PTPN1	0.002343	4.848e-06
ABCE1	RAP1GDS1	0.002391	2.187e-09
ABCE1	RAPGEF6	0.0006707	6.893e-14
ABCE1	RCOR1	0.0009557	1.313e-09
ABCE1	REV3L	0.001257	5.087e-08
ABCE1	RICTOR	0.004787	5.385e-12
ABCE1	RNF138	4.058e-06	6.804e-15
ABCE1	SCAI	0.0003619	5.816e-14
ABCE1	SETDB2	0.0007052	4.861e-06
ABCE1	SLK	0.001185	1.11e-09
ABCE1	SMEK2	0.004632	1.554e-11
ABCE1	SNRK	0.001726	1.56e-09
ABCE1	SPAST	0.0008085	2.368e-11
ABCE1	SRSF11	1.876e-05	1.686e-07
ABCE1	TATDN2	0.009923	7.009e-06
ABCE1	TET3	0.005114	8.785e-12
ABCE1	TMTC3	0.006558	6.27e-07
ABCE1	TNRC6A	0.006608	5.112e-09
ABCE1	UBTD2	0.0009594	9.404e-13
ABCE1	UBTF	0.003483	2.315e-08
ABCE1	YTHDF3	9.817e-06	5.339e-22
ABCE1	ZBTB1	0.002474	3.193e-08
ABCE1	ZBTB10	0.008281	1.144e-13
ABCE1	ZMIZ1	0.0003118	3.473e-06
ABCE1	ZNF718	0.0009212	9.754e-08
ABCF2	AQP11	0.0005739	4.849e-06
ABCF2	ARMC1	0.0009952	4.244e-08
ABCF2	AXIN2	0.003543	6.064e-07
ABCF2	BAG4	0.0005528	6.407e-08
ABCF2	CDC37L1	0.003367	3.046e-06
ABCF2	CDK5R1	0.00532	9.022e-06
ABCF2	EPHA1	0.0001641	1.035e-06
ABCF2	GPN1	0.0001502	2.913e-06
ABCF2	GPR63	0.001077	7.862e-06
ABCF2	HDGF	0.002587	2.032e-07
ABCF2	HIATL1	0.002517	5.007e-08
ABCF2	LENG8	0.007754	7.894e-06
ABCF2	LMAN2L	4.887e-07	6.289e-06
ABCF2	NBR1	0.005152	9.19e-06
ABCF2	PAPD4	0.0008338	1.287e-08
ABCF2	PDAP1	0.00693	4.683e-08
ABCF2	PDCD11	3.187e-05	6.408e-10
ABCF2	PDIK1L	0.0003851	2.636e-07
ABCF2	PLEKHA1	0.001183	1.125e-07
ABCF2	PPP1R14C	0.009495	9.371e-06
ABCF2	SLITRK6	0.001735	2.975e-06
ABCF2	SOS1	0.0006412	2.356e-08
ABCF2	TBC1D19	0.0006948	9.482e-06
ABCF2	VTI1A	0.004554	4.99e-07
ABCF2	WWP1	0.0004134	1.314e-07
ABCF3	AHNAK2	9.404e-07	2.299e-06
ABCF3	AP2A1	4.443e-06	2.344e-06
ABCF3	ATXN7L3	0.003143	7.875e-06
ABCF3	BSDC1	7.614e-05	5.858e-06
ABCF3	C17orf59	0.0002332	1.719e-07
ABCF3	C19orf6	3.509e-06	2.588e-06
ABCF3	C1QL4	7.441e-05	5.021e-06
ABCF3	CCND1	3.437e-05	5.053e-06
ABCF3	CHD6	0.001582	4.772e-06
ABCF3	EGLN2	0.0009157	5.458e-06
ABCF3	EIF2B5	6.075e-07	2.081e-10
ABCF3	IRF2BPL	0.004009	8.387e-07
ABCF3	LRRC57	0.00018	7.182e-07
ABCF3	MARCH9	3.74e-05	7.467e-06
ABCF3	NFE2L1	1.417e-05	1.196e-06
ABCF3	PEX5	2.426e-05	6.43e-06
ABCF3	PIK3IP1	0.0007254	8.104e-06
ABCF3	PPP1R14C	0.001664	6.529e-06
ABCF3	PUF60	4.932e-06	1.59e-06
ABCF3	RANBP3	0.0003488	7.04e-08
ABCF3	RIC8A	6.405e-06	3.898e-06
ABCF3	SPRYD3	5.218e-07	8.038e-08
ABCF3	TMEM55B	0.0012	9.383e-06
ABCF3	USP19	2.059e-05	1.594e-07
ABCF3	WDTC1	0.0002998	4.728e-07
ABCG1	WDR19	0.0008525	5.877e-06
ABCG2	ACBD5	0.002093	1.185e-06
ABCG2	BNC2	0.007119	4.666e-07
ABCG2	ITFG1	0.0001373	4.219e-06
ABCG2	KLHL2	0.0005487	1.496e-06
ABCG2	LRP4	0.0005816	5.022e-06
ABCG2	PFKP	0.0008704	3.324e-06
ABCG2	RASL11B	0.0001373	4.088e-06
ABCG2	RGMA	0.006758	1.971e-06
ABCG2	SLC35F5	0.009801	7.588e-06
ABCG2	TBC1D9	0.002335	2.628e-07
ABCG4	AFF1	0.0002015	4.503e-06
ABCG4	ANKRA2	3.892e-05	3.985e-07
ABCG4	ARHGAP1	0.0001674	2.294e-06
ABCG4	ATXN1	5.622e-05	1.132e-07
ABCG4	BNC2	0.003052	3.917e-08
ABCG4	BTG2	0.0001654	2.623e-07
ABCG4	CALD1	0.00112	1.443e-09
ABCG4	CDC25A	6.474e-06	2.405e-06
ABCG4	CDCA7	1.145e-08	1.394e-08
ABCG4	CPNE2	0.004964	5.869e-09
ABCG4	CRY2	3.707e-07	1.531e-06
ABCG4	DDX26B	0.0006824	4.108e-07
ABCG4	DNAJC16	0.0003645	5.132e-07
ABCG4	E2F3	0.0007424	1.96e-08
ABCG4	ESR1	0.005328	6.73e-09
ABCG4	EYA4	0.001974	4.257e-07
ABCG4	FAM102A	0.005551	3.408e-06
ABCG4	FAM13C	3.929e-06	6.968e-06
ABCG4	FAM46C	4.205e-05	3.532e-06
ABCG4	FIBIN	0.001368	2.199e-07
ABCG4	FOXA1	0.00174	2.271e-07
ABCG4	FSTL1	0.00635	3.394e-06
ABCG4	GABBR2	0.007961	1.037e-07
ABCG4	GDF11	0.003208	1.269e-06
ABCG4	GIT2	1.846e-08	8.721e-06
ABCG4	GLIS3	0.002047	1.329e-07
ABCG4	GOLGA1	0.0004406	3.946e-07
ABCG4	GPC6	0.0001298	5.203e-06
ABCG4	HAS2	1.842e-07	6.483e-07
ABCG4	HEG1	0.0006158	3.166e-08
ABCG4	HOXC8	0.004473	9.477e-08
ABCG4	ITGA11	0.001108	1.049e-06
ABCG4	ITGA6	0.006758	6.78e-06
ABCG4	LAMP5	0.0003063	1.315e-07
ABCG4	LATS2	4.66e-05	5.481e-06
ABCG4	LHFP	0.003857	8.596e-06
ABCG4	LIMA1	0.0005943	8.478e-07
ABCG4	LRP4	3.209e-05	7.57e-08
ABCG4	MAPK4	0.0001593	5.677e-07
ABCG4	MID1	0.002716	7.072e-07
ABCG4	MIDN	6.549e-06	2.048e-06
ABCG4	NEK9	8.973e-05	4.848e-08
ABCG4	NFIB	0.001774	7.242e-07
ABCG4	OTX1	0.00238	2.141e-07
ABCG4	PDGFRA	0.001112	8.797e-06
ABCG4	PGBD5	0.006987	5.341e-06
ABCG4	POLR3G	3.003e-06	4.855e-06
ABCG4	PRDM13	0.004305	8.803e-06
ABCG4	PRDM6	8.967e-05	1.393e-09
ABCG4	PRR15	1.305e-09	2.437e-07
ABCG4	PTPN21	0.007313	1.292e-07
ABCG4	RAB5B	8.122e-05	8.651e-07
ABCG4	RABEP1	5.745e-08	3.937e-07
ABCG4	REEP5	0.001451	5.082e-07
ABCG4	RGMA	0.0006908	2.324e-07
ABCG4	RGMB	0.0008444	7.511e-06
ABCG4	RRAGD	6.844e-06	7.493e-07
ABCG4	SAR1B	7.189e-08	2.324e-06
ABCG4	SEMA4B	1.14e-07	9.276e-07
ABCG4	SKI	3.162e-06	4.377e-08
ABCG4	SLC16A6	1.128e-05	8.104e-07
ABCG4	SLC24A2	0.001211	9.992e-09
ABCG4	SLC39A6	6.034e-07	7.907e-07
ABCG4	SLC40A1	6.549e-06	1.069e-06
ABCG4	SNRK	3.966e-05	4.013e-06
ABCG4	SOBP	0.0003994	1.788e-07
ABCG4	SPOPL	0.003594	3.831e-07
ABCG4	SPRY4	0.007799	2.089e-06
ABCG4	STK38	4.854e-06	1.477e-06
ABCG4	SYDE1	2.372e-06	4.116e-08
ABCG4	SYTL4	5.183e-08	2.032e-06
ABCG4	TBC1D9	6.562e-05	3.559e-08
ABCG4	TCF7L1	2.14e-05	4.619e-08
ABCG4	TGFB1I1	6.771e-06	2.802e-09
ABCG4	TMEM25	6.58e-06	8.243e-06
ABCG4	TRIM3	0.003246	1.865e-06
ABCG4	TRIM8	0.006239	3.839e-06
ABCG4	TSG101	0.002204	6.527e-06
ABCG4	ZFPM2	0.0005325	2.303e-09
ABCG4	ZNF532	0.0001298	4.315e-07
ABHD13	ACAP2	0.002859	3.093e-16
ABHD13	ACTR2	0.008206	1.168e-13
ABHD13	ACTR3	0.001001	2.494e-09
ABHD13	ADAM10	0.005077	1.759e-12
ABHD13	AFF4	0.006787	6.863e-12
ABHD13	AGGF1	0.001816	6.928e-12
ABHD13	ANKIB1	0.008321	9.192e-17
ABHD13	ANKRD13C	0.001582	1.51e-14
ABHD13	ANKRD28	0.002296	1.046e-12
ABHD13	ANKRD44	0.004555	8.14e-09
ABHD13	ARID5B	0.00109	1.426e-16
ABHD13	ARMC1	0.006776	6.563e-09
ABHD13	ASPN	2.669e-05	1.619e-07
ABHD13	ATP2A2	0.001958	5.499e-13
ABHD13	ATP8A1	0.007055	2.645e-07
ABHD13	ATP8B1	0.004517	4.263e-06
ABHD13	AZIN1	0.0008525	3.588e-13
ABHD13	BAI3	0.002585	9.059e-11
ABHD13	BCL11A	0.0001916	2.086e-14
ABHD13	BRMS1L	0.0002708	1.268e-12
ABHD13	C16orf87	0.0002253	1.224e-06
ABHD13	C21orf91	0.002256	5.01e-09
ABHD13	C5orf43	0.008393	3.208e-06
ABHD13	C6orf62	0.003094	2.463e-12
ABHD13	CADM2	0.002003	2.795e-06
ABHD13	CAND1	0.0006516	3.633e-12
ABHD13	CCND2	0.0002748	3.882e-08
ABHD13	CDC42	0.006352	5.006e-09
ABHD13	CDK13	0.00379	1.062e-08
ABHD13	CEP350	0.003857	1.275e-19
ABHD13	CHMP7	0.001045	2.551e-08
ABHD13	CHSY3	0.005154	2.632e-10
ABHD13	CLDN11	0.004935	3.704e-08
ABHD13	CNKSR2	0.0002386	2.334e-15
ABHD13	CPEB1	0.003452	1.158e-08
ABHD13	CPEB3	0.000546	6.205e-16
ABHD13	DCP1A	0.009947	8.023e-13
ABHD13	DDX3X	0.0004406	6.633e-20
ABHD13	DMXL1	0.0007428	8.862e-15
ABHD13	E2F3	0.001202	5.145e-15
ABHD13	EEA1	0.003064	8.837e-14
ABHD13	ELAVL2	0.001688	4.752e-09
ABHD13	ESRRG	0.001876	2.665e-12
ABHD13	FAM126B	0.002419	1.918e-14
ABHD13	FAM133B	0.009837	7.33e-09
ABHD13	FBXL17	0.007698	6.704e-11
ABHD13	FNBP4	0.007791	2.287e-07
ABHD13	FNIP1	0.000712	1.439e-17
ABHD13	FOXN3	0.001144	2.725e-09
ABHD13	FRS2	0.0001033	2.159e-11
ABHD13	FRYL	0.006232	3.962e-12
ABHD13	GNPDA2	8.443e-05	1.407e-09
ABHD13	GPM6B	0.0006312	1.252e-12
ABHD13	GPR158	0.002729	6.767e-06
ABHD13	GSPT1	0.002572	9.921e-06
ABHD13	HERC3	0.008221	1.214e-09
ABHD13	HIPK1	0.0003247	1.2e-18
ABHD13	HNRNPK	0.009441	1.641e-13
ABHD13	IGF2BP3	0.001436	2.215e-12
ABHD13	ITPR1	0.0003335	7.005e-09
ABHD13	JAZF1	5.663e-05	3.935e-14
ABHD13	JMY	0.005478	1.031e-15
ABHD13	KAT6B	3.887e-05	1.845e-13
ABHD13	KCNA1	0.001709	4.479e-08
ABHD13	KIAA1109	0.009316	2.113e-10
ABHD13	KLF5	0.001217	3.195e-12
ABHD13	LCOR	0.004846	3.931e-21
ABHD13	LHFPL2	0.004749	1.714e-06
ABHD13	LRP12	0.0005315	6.565e-10
ABHD13	LRRC1	1.321e-05	4.771e-09
ABHD13	LUZP1	0.003998	7.133e-10
ABHD13	LUZP6	0.003903	1.995e-11
ABHD13	MAB21L1	0.001924	8.702e-07
ABHD13	MAGEL2	0.002349	3.893e-06
ABHD13	MAP3K3	0.005522	2.565e-06
ABHD13	MAST4	0.004178	3.553e-13
ABHD13	MBTD1	0.004192	5.859e-14
ABHD13	MED1	0.004716	4.132e-07
ABHD13	MEF2A	0.0003543	1.326e-14
ABHD13	MET	0.00401	2.512e-07
ABHD13	MLL5	0.003964	2.619e-15
ABHD13	MMP16	0.001762	2.208e-11
ABHD13	MTDH	0.001217	2.164e-07
ABHD13	MTMR12	0.0005641	7.947e-12
ABHD13	NCOA1	0.0001965	4.168e-12
ABHD13	NEGR1	0.009083	7.857e-10
ABHD13	NOVA1	0.00506	1.534e-09
ABHD13	NPC1	0.006312	4.558e-08
ABHD13	NR3C1	0.009422	9.09e-18
ABHD13	NR4A3	2.042e-06	7.984e-07
ABHD13	NUFIP2	0.005745	2.157e-15
ABHD13	OTUD4	0.006796	3.889e-14
ABHD13	OXSR1	0.007769	5.085e-12
ABHD13	PAIP1	2.634e-05	5.322e-06
ABHD13	PAPD5	0.003959	7.749e-08
ABHD13	PAXIP1	0.006206	4.778e-07
ABHD13	PCDH10	0.0008702	8.797e-06
ABHD13	PCDH18	0.003942	5.249e-07
ABHD13	PDE10A	0.009954	6.607e-09
ABHD13	PDE8A	0.0006227	1.423e-06
ABHD13	PDE8B	0.001924	1.944e-07
ABHD13	PDS5A	0.002157	1.789e-09
ABHD13	PHF3	0.007848	2.523e-11
ABHD13	PHIP	0.008314	2.363e-17
ABHD13	PKN2	0.001335	1.207e-14
ABHD13	PPM1B	0.006934	4.425e-14
ABHD13	PPP1R12A	0.001582	4.009e-15
ABHD13	PPP3R1	0.005988	1.111e-15
ABHD13	PRKAR1A	0.005416	2.282e-12
ABHD13	PTPN14	0.008507	1.02e-10
ABHD13	PTPRK	0.007698	2.297e-06
ABHD13	PUM2	0.003964	1.191e-16
ABHD13	RAB23	0.0004369	3.469e-06
ABHD13	RAB8B	0.0004856	9.08e-16
ABHD13	RANBP9	0.003113	3.268e-07
ABHD13	RAP1A	0.005993	4e-11
ABHD13	RAP2C	0.001017	3.796e-07
ABHD13	RASA1	0.000128	4.604e-19
ABHD13	RBM12	0.002494	1.028e-19
ABHD13	RECK	0.001652	5.869e-07
ABHD13	RNF19A	0.001453	1.858e-07
ABHD13	RNF4	0.001456	3.657e-10
ABHD13	RSBN1	0.0004944	2.923e-16
ABHD13	SDC2	0.0049	5.388e-06
ABHD13	SERTAD2	0.007394	6.896e-09
ABHD13	SHOX2	0.002137	1.289e-06
ABHD13	SLAIN2	0.003199	2.96e-07
ABHD13	SLC12A2	0.00986	1.693e-11
ABHD13	SLC25A36	0.004028	3.649e-15
ABHD13	SLC37A3	0.00517	4.475e-07
ABHD13	SLC44A5	0.0002646	8.413e-07
ABHD13	SNAI2	0.0005245	5.673e-12
ABHD13	SNAP91	0.004923	2.331e-06
ABHD13	SNX13	1.56e-05	3.41e-19
ABHD13	SNX29	0.001474	2.015e-06
ABHD13	SOX11	0.001144	1.303e-10
ABHD13	SOX6	0.0003158	3.853e-07
ABHD13	SRPK2	0.00209	1.753e-08
ABHD13	STAC	0.009611	5.492e-06
ABHD13	SYNCRIP	0.0001908	2.004e-16
ABHD13	TEK	0.001751	5.907e-08
ABHD13	TMEM64	0.001607	1.737e-08
ABHD13	TOPORS	0.007628	4.492e-10
ABHD13	TOX	0.001994	2.212e-06
ABHD13	TSHZ3	0.004582	1.794e-12
ABHD13	TWF1	0.00401	2.989e-11
ABHD13	UBE2E1	0.0008695	2.947e-10
ABHD13	UBR5	0.006787	2.402e-07
ABHD13	VEZF1	0.0011	2.857e-19
ABHD13	VPS36	0.006529	9.329e-13
ABHD13	YIPF4	0.0005703	2.073e-16
ABHD13	YTHDF3	0.0002148	3.842e-08
ABHD13	ZEB2	0.000845	1.915e-11
ABHD13	ZFHX4	0.001085	8.49e-17
ABHD13	ZHX1	0.009079	3.36e-09
ABHD13	ZNF148	0.003138	4.026e-15
ABHD13	ZNF449	0.003086	7.393e-12
ABHD13	ZNF532	0.005552	7.176e-11
ABHD2	ANKIB1	0.002112	1.058e-07
ABHD2	AP4E1	0.006205	6.956e-14
ABHD2	BTG3	0.004781	9.333e-06
ABHD2	C7orf60	0.002168	1.45e-06
ABHD2	CDC37L1	0.0006792	1.007e-06
ABHD2	CDK8	0.007669	1.104e-06
ABHD2	CELF2	0.006887	1.215e-11
ABHD2	CIT	0.004956	8.835e-06
ABHD2	DENND5B	0.002627	1.906e-07
ABHD2	DMD	0.004607	1.667e-12
ABHD2	EIF2C1	0.002659	9.343e-09
ABHD2	EPHB2	0.0003635	8.343e-06
ABHD2	FCHO2	0.006323	5.882e-13
ABHD2	GJA1	0.0006052	4.873e-12
ABHD2	GNPDA2	0.005009	1.504e-10
ABHD2	HGF	0.008957	2.548e-09
ABHD2	HMGA2	0.005231	1.736e-06
ABHD2	HNRNPU	0.001634	1.703e-14
ABHD2	KLHL15	0.009234	1.753e-10
ABHD2	MAGI3	0.0009343	6.07e-06
ABHD2	MAP3K1	0.003447	2.316e-14
ABHD2	MYEF2	0.009814	1.175e-06
ABHD2	NBEAL1	0.0003926	7.175e-07
ABHD2	NCK2	0.007761	5.19e-07
ABHD2	NCOA3	3.7e-05	1.11e-10
ABHD2	NIN	0.009814	1.157e-06
ABHD2	NPC1	0.005649	3.203e-10
ABHD2	OTUD1	0.002885	4.648e-07
ABHD2	PFN2	0.004719	3.558e-06
ABHD2	PKD2	0.002994	3.668e-08
ABHD2	PREX1	0.0001178	2.955e-06
ABHD2	PTPN13	0.005731	8.329e-08
ABHD2	RFX7	0.002721	6.269e-14
ABHD2	RORA	0.000869	2.493e-15
ABHD2	RUNX1	0.00188	3.113e-09
ABHD2	SYBU	0.003801	1.117e-09
ABHD2	TFDP1	0.003835	3.847e-11
ABHD2	TIMP3	0.003446	1.046e-06
ABHD2	TNRC6B	0.007842	1.021e-10
ABHD2	TWF1	0.005521	3.62e-13
ABHD2	WNK3	0.001287	1.58e-09
ABHD2	ZHX2	0.004428	5.761e-07
ABHD2	ZNF148	0.004185	1.947e-12
ABHD3	ANKRD13C	1.562e-06	6.812e-07
ABHD3	APC	0.004133	5.897e-07
ABHD3	ARHGAP12	0.006515	8.814e-07
ABHD3	ARID4A	0.0007844	2.988e-06
ABHD3	ARID4B	0.0004646	5.947e-09
ABHD3	ASAP1	0.0009308	3.428e-06
ABHD3	ASH1L	0.0002854	3.104e-06
ABHD3	ATXN1	0.008047	1.241e-07
ABHD3	BRWD1	0.001487	1.511e-08
ABHD3	C2orf69	0.003386	9.228e-07
ABHD3	C5orf24	0.00479	5.492e-08
ABHD3	CALM2	0.009391	2.553e-06
ABHD3	CDK17	0.005794	1.788e-06
ABHD3	CDK2	1.283e-07	1.364e-06
ABHD3	CGGBP1	0.001733	1.564e-06
ABHD3	CPEB2	0.001315	6.951e-07
ABHD3	CPEB3	0.003858	8.822e-08
ABHD3	CPSF6	2.046e-05	1.101e-08
ABHD3	CUL3	0.001988	2.737e-06
ABHD3	DCAF12	0.006699	6.529e-07
ABHD3	DCUN1D1	3.106e-05	9.687e-14
ABHD3	DNAJB14	0.0003247	1.054e-06
ABHD3	DPP8	3.224e-05	3.605e-06
ABHD3	EFR3A	2.892e-05	1.686e-06
ABHD3	ERBB3	0.0009254	4.598e-06
ABHD3	FBXL17	0.004523	1.057e-13
ABHD3	FBXO28	0.0008837	8.721e-06
ABHD3	FCHO2	0.005937	1.501e-07
ABHD3	FMR1	0.008041	1.491e-07
ABHD3	FNDC3A	0.006282	1.664e-10
ABHD3	FOXP1	0.001339	2.422e-09
ABHD3	GALNT4	0.0004977	1.512e-08
ABHD3	GPBP1	0.004629	6.203e-06
ABHD3	GRM5	1.811e-05	4.888e-06
ABHD3	HBP1	0.00744	1.63e-08
ABHD3	HECTD2	5.83e-05	3.783e-06
ABHD3	HIPK3	0.009225	1.173e-08
ABHD3	HMGXB4	0.005709	5.809e-06
ABHD3	HNRNPK	0.004543	5.658e-08
ABHD3	IKZF2	0.001158	8.753e-07
ABHD3	IKZF4	0.002684	1.761e-06
ABHD3	IRF2	0.0006762	1.91e-07
ABHD3	KAT6A	0.009773	6.402e-06
ABHD3	KIAA1462	0.009808	3.986e-06
ABHD3	KIF13A	3.03e-07	1.137e-06
ABHD3	KLF3	0.004887	9.977e-08
ABHD3	KLHL15	0.0004646	1.514e-06
ABHD3	LCORL	0.0008513	5.93e-06
ABHD3	LRIG1	0.006221	2.891e-07
ABHD3	LYPD6	6.303e-06	9.937e-08
ABHD3	LYSMD3	8.474e-05	2.201e-07
ABHD3	MARK1	1.678e-06	2.283e-06
ABHD3	MBNL1	0.0001896	2.066e-08
ABHD3	MIER1	0.002133	7.663e-09
ABHD3	MIER3	0.0002238	7.493e-09
ABHD3	MLL	0.001368	2.081e-07
ABHD3	MLL3	0.009406	6.49e-08
ABHD3	MTF1	0.001455	4.897e-07
ABHD3	MYB	0.009516	7.59e-11
ABHD3	MYBL1	4.81e-06	2.106e-06
ABHD3	MYLIP	0.007745	7.307e-06
ABHD3	NAA16	0.001293	4.131e-07
ABHD3	NEK9	6.357e-07	4.509e-15
ABHD3	NFIA	0.001578	1.993e-07
ABHD3	NR1D2	0.0002361	3.337e-06
ABHD3	NR2C2	0.0002609	2.006e-06
ABHD3	NR4A2	0.001006	6.453e-07
ABHD3	NUFIP2	0.007357	1.599e-07
ABHD3	OTUD4	0.0007991	4.924e-08
ABHD3	PAPD5	0.0007178	1.487e-06
ABHD3	PAPOLA	0.0003175	1.701e-07
ABHD3	PDIK1L	5.218e-07	7.708e-12
ABHD3	PFN2	0.002128	1.182e-06
ABHD3	PHF14	3.893e-06	6.875e-06
ABHD3	PHF2	0.00179	4.06e-06
ABHD3	PIK3CA	0.00193	3.153e-06
ABHD3	POLK	6.435e-05	2.426e-06
ABHD3	PSEN1	0.001526	4.335e-07
ABHD3	PTPRG	0.0001749	8.822e-06
ABHD3	PWWP2A	0.002354	6.75e-06
ABHD3	RABEP1	0.001452	2.283e-10
ABHD3	RACGAP1	0.001169	1.906e-06
ABHD3	RBL2	0.004629	4.596e-07
ABHD3	RBM25	0.000365	9.649e-06
ABHD3	RNF145	3.57e-05	2.791e-07
ABHD3	RNF38	0.00022	7.75e-08
ABHD3	RPS6KA5	0.00143	9.643e-06
ABHD3	RSBN1	1.75e-05	1.217e-12
ABHD3	RSBN1L	8.49e-07	5.365e-07
ABHD3	SAR1B	0.003867	3.176e-08
ABHD3	SLAIN2	0.005626	2.012e-06
ABHD3	SLC16A6	0.004939	9.227e-06
ABHD3	SLC35F5	1.18e-05	5.69e-08
ABHD3	SLC44A1	0.001521	7.161e-12
ABHD3	SOX6	0.0001405	9.625e-07
ABHD3	SPOPL	9.734e-06	2.121e-07
ABHD3	SRSF7	0.004488	2.16e-07
ABHD3	STAG2	0.009425	9.328e-09
ABHD3	STARD13	0.003386	1.795e-06
ABHD3	SYNJ1	8.152e-05	1.57e-08
ABHD3	TARDBP	0.007887	2.94e-09
ABHD3	TBL1XR1	3.202e-05	6.677e-08
ABHD3	TMED7-TICAM2	0.0003056	7.338e-06
ABHD3	TRAPPC8	0.006365	2.702e-09
ABHD3	TWF1	2.271e-05	1.424e-08
ABHD3	UBE2W	0.003492	7.919e-08
ABHD3	UBE3A	0.002498	2.273e-09
ABHD3	UVRAG	0.00336	4.586e-06
ABHD3	VLDLR	0.001061	5.57e-06
ABHD3	VMP1	0.001119	1.159e-06
ABHD3	WEE1	0.001053	5.914e-07
ABHD3	ZBTB11	0.0004361	8.807e-07
ABHD3	ZFPM2	1.66e-06	8.859e-06
ABHD3	ZNF148	0.0001814	9.022e-09
ABHD3	ZNF217	0.001019	3.269e-06
ABHD3	ZNF236	2.276e-06	4.868e-09
ABHD3	ZNF367	0.006707	5.442e-12
ABHD4	GIT2	0.002437	5.22e-08
ABHD5	ARPP19	0.008029	7.407e-08
ABHD5	GSK3B	9.389e-05	7.243e-14
ABHD5	LMLN	0.003454	3.136e-06
ABHD5	LRRC58	0.001039	1.934e-07
ABHD5	MIB1	0.005561	5.996e-08
ABHD5	NCKIPSD	0.002269	6.808e-07
ABHD5	PTBP3	0.005164	4.106e-09
ABHD5	RNF141	0.002527	5.204e-08
ABHD5	RNF19A	0.0002877	7.767e-06
ABHD5	SCAF11	0.005157	3.184e-11
ABHD6	AGGF1	0.003652	1.943e-08
ABI1	ACBD5	0.001718	1.653e-21
ABI1	ACPL2	0.004734	1.65e-07
ABI1	ADAM9	0.001231	6.454e-08
ABI1	AEBP2	0.00121	7.44e-16
ABI1	AFF4	0.0005495	3.83e-22
ABI1	AFTPH	0.005668	3.767e-11
ABI1	AKAP9	4.228e-07	2.643e-17
ABI1	AKT3	0.003553	6.432e-17
ABI1	AKTIP	0.0002952	5.109e-08
ABI1	ALCAM	0.0001195	3.784e-10
ABI1	ALDH1A3	0.0001179	2.192e-07
ABI1	ALX4	5.842e-05	7.719e-07
ABI1	AMBRA1	0.008871	3.538e-08
ABI1	ANKFY1	0.0006021	1.214e-18
ABI1	ANKIB1	6.249e-06	4.477e-17
ABI1	ANKRA2	0.003319	3.113e-10
ABI1	ANKRD13C	1.939e-07	1.392e-21
ABI1	ANKRD28	0.006909	1.823e-12
ABI1	ANKRD50	6.754e-05	3.138e-16
ABI1	AP1G1	6.251e-06	3.665e-10
ABI1	APPL1	0.009012	2.273e-20
ABI1	ARAP2	0.0008749	5.656e-09
ABI1	ARF6	0.002047	6.424e-09
ABI1	ARHGAP1	9.294e-05	1.751e-10
ABI1	ARHGAP12	0.0002755	3.666e-26
ABI1	ARHGAP35	0.0038	3.061e-08
ABI1	ARHGEF10	0.002779	5.994e-06
ABI1	ARHGEF3	0.000612	2.264e-07
ABI1	ARID4B	1.912e-05	6.348e-16
ABI1	ARL4A	0.0001032	3.442e-07
ABI1	ARNT	0.003156	6.006e-13
ABI1	ARPP21	0.004605	6.492e-06
ABI1	ARRDC3	0.0003903	3.164e-15
ABI1	ASF1A	0.00033	3.038e-08
ABI1	ASH1L	0.001283	5.9e-12
ABI1	ATAD2B	0.006423	6.79e-17
ABI1	ATG14	0.0009514	7.381e-11
ABI1	ATG2B	0.008771	5.747e-13
ABI1	ATG7	0.005754	8.282e-10
ABI1	ATL2	0.001278	8.549e-15
ABI1	ATL3	7.852e-07	1.419e-10
ABI1	ATP2B1	1.879e-05	3.123e-13
ABI1	ATP6V0E1	1.755e-05	5.219e-06
ABI1	ATPBD4	5.293e-06	1.993e-08
ABI1	ATRN	5.694e-05	2.437e-15
ABI1	ATRX	0.001941	1.088e-17
ABI1	ATXN1	0.0008351	5.83e-15
ABI1	ATXN7L1	4.555e-06	6.234e-11
ABI1	BAHD1	0.0002856	1.13e-08
ABI1	BAZ1A	0.005489	2.785e-12
ABI1	BAZ2A	0.003874	1.066e-08
ABI1	BBX	0.001826	1.844e-15
ABI1	BCL11A	5.822e-05	5.836e-17
ABI1	BCL11B	0.007956	5.601e-11
ABI1	BCL2L11	0.0001932	1.963e-10
ABI1	BECN1	0.004989	3.087e-10
ABI1	BHLHE41	9.598e-05	2.935e-09
ABI1	BICD2	0.008644	3.297e-15
ABI1	BIRC6	0.001983	5.306e-16
ABI1	BIVM	0.0003888	2.299e-06
ABI1	BNC2	0.001141	1.569e-08
ABI1	BNIP2	0.0004125	1.314e-09
ABI1	BRMS1L	0.003452	5.976e-12
ABI1	BRWD1	0.0005871	5.486e-15
ABI1	BTAF1	0.001101	1.985e-17
ABI1	BTBD10	0.00994	2.905e-12
ABI1	BTBD7	5.073e-05	1.189e-17
ABI1	C11orf30	7.985e-07	5.213e-12
ABI1	C14orf28	0.002475	5.113e-07
ABI1	C16orf52	0.0009102	4.698e-22
ABI1	C16orf70	0.003722	3.443e-07
ABI1	C17orf104	0.006672	8.611e-11
ABI1	C20orf112	0.00195	1.213e-07
ABI1	C5orf24	0.00904	9.231e-18
ABI1	C5orf30	0.001521	7.777e-12
ABI1	C6orf62	0.000526	9.789e-15
ABI1	C7orf60	6.176e-06	8.464e-23
ABI1	C8orf59	0.0001576	5.885e-07
ABI1	CA10	0.005041	3.049e-06
ABI1	CACNB4	0.006274	1.18e-06
ABI1	CADM2	0.0001758	3.104e-07
ABI1	CAMSAP2	9.887e-06	5.277e-17
ABI1	CAMTA1	0.0008903	4.828e-11
ABI1	CAPRIN1	2.452e-06	1.65e-11
ABI1	CAPRIN2	0.006531	2.01e-08
ABI1	CASD1	0.0002573	2.92e-11
ABI1	CASK	0.00844	6.89e-10
ABI1	CASP7	0.001722	5.111e-07
ABI1	CBFB	0.006331	2.792e-16
ABI1	CBLL1	0.000338	1.471e-11
ABI1	CCAR1	0.005942	6.748e-12
ABI1	CCDC85A	0.005903	5.844e-06
ABI1	CCDC88A	0.0001708	3.569e-08
ABI1	CCNG2	0.00336	1.781e-07
ABI1	CCNJ	0.003412	7.283e-17
ABI1	CCNT2	0.001474	6.794e-15
ABI1	CDC37L1	6.89e-07	4.52e-16
ABI1	CDC42BPA	0.006967	2.465e-07
ABI1	CDK17	1.322e-05	6.673e-18
ABI1	CDK19	0.005143	2.745e-18
ABI1	CDKN2AIP	0.0003355	6.123e-13
ABI1	CDS1	0.003061	1.167e-08
ABI1	CDYL	0.003525	1.064e-08
ABI1	CELF1	0.005901	5.961e-16
ABI1	CELF2	3.235e-09	9.579e-18
ABI1	CENPO	0.005577	1.057e-09
ABI1	CEP57	1.01e-05	8.182e-09
ABI1	CEP97	0.0002374	4.534e-14
ABI1	CHD9	4.855e-06	1.29e-13
ABI1	CHSY3	0.005704	8.013e-11
ABI1	CHUK	0.0008084	8.914e-10
ABI1	CIT	0.001128	7.751e-07
ABI1	CKS1B	0.005592	3.459e-07
ABI1	CLASP2	0.001598	6.372e-18
ABI1	CMIP	0.007178	1.093e-06
ABI1	CMPK1	0.0002571	1.324e-10
ABI1	CNEP1R1	0.002028	5.846e-09
ABI1	CNIH	0.002914	1.484e-06
ABI1	CNOT2	0.00716	2.142e-16
ABI1	CNOT4	0.0001533	6.702e-12
ABI1	CNOT6	0.0008613	4.156e-20
ABI1	CNOT6L	0.00861	3.757e-21
ABI1	CNOT7	0.0009845	4.519e-11
ABI1	COL4A5	0.001848	9.779e-06
ABI1	COPS2	5.556e-05	8.427e-11
ABI1	CPEB1	0.009181	6.364e-08
ABI1	CPEB2	0.005097	4.934e-22
ABI1	CPEB3	9.524e-07	2.749e-22
ABI1	CPEB4	3.122e-07	8.423e-11
ABI1	CPSF6	0.008107	6.711e-15
ABI1	CRAMP1L	0.005592	2.508e-12
ABI1	CREB1	5.83e-05	3.958e-18
ABI1	CREB5	0.005163	1.864e-10
ABI1	CREBBP	0.00394	5.71e-15
ABI1	CREBRF	0.0005648	8.974e-14
ABI1	CREBZF	0.001834	6.167e-14
ABI1	CREM	0.0001307	1.103e-11
ABI1	CRIM1	0.0003362	1.989e-10
ABI1	CRY2	0.0009748	6.434e-10
ABI1	CSE1L	0.0008115	1.54e-06
ABI1	CSGALNACT1	0.006038	6.824e-09
ABI1	CTDSPL2	0.007562	4.94e-10
ABI1	CTR9	0.008972	1.4e-10
ABI1	CUL3	2.62e-07	1.755e-22
ABI1	CXCL12	0.0003201	1.342e-11
ABI1	CYB5R4	0.002186	2.431e-13
ABI1	DCAF12	0.0001093	5.397e-13
ABI1	DCAF8	0.0004913	1.056e-09
ABI1	DCBLD2	6.68e-06	4.448e-11
ABI1	DCLK1	0.0002478	1.53e-08
ABI1	DDX3X	0.003544	1.354e-16
ABI1	DDX5	1.11e-07	1.955e-12
ABI1	DEDD	0.004374	7.905e-10
ABI1	DENND4C	0.008871	8.168e-11
ABI1	DHX57	0.005433	5.057e-11
ABI1	DIP2A	0.006475	9.755e-08
ABI1	DIP2C	0.0002258	1.472e-21
ABI1	DLC1	0.0007942	4.285e-12
ABI1	DLG1	0.001645	1.108e-14
ABI1	DNAJB4	0.0008442	3.093e-11
ABI1	DNAJB6	8.593e-05	9.121e-08
ABI1	DNAJB9	0.003452	2.289e-10
ABI1	DNAJC16	0.0003371	1.375e-13
ABI1	DNAJC21	0.008771	6.792e-06
ABI1	DOCK4	0.002076	2.405e-22
ABI1	DPP10	4.359e-06	1.913e-06
ABI1	DPYSL2	1.136e-06	5.296e-10
ABI1	DPYSL5	0.000119	2.31e-06
ABI1	DYNC1LI2	7.129e-05	1.165e-17
ABI1	DYRK1A	0.002721	7.827e-13
ABI1	DYRK2	0.0002882	8.894e-17
ABI1	E2F5	0.0005707	3.246e-14
ABI1	EBF1	0.0002562	7.484e-13
ABI1	EEA1	0.00254	1.082e-10
ABI1	EFNB2	0.0001453	1.82e-06
ABI1	EGR1	1.793e-06	8.312e-06
ABI1	EGR3	0.0003767	1.025e-07
ABI1	ELAVL2	3.509e-06	2.504e-08
ABI1	ELK3	0.0001032	5.173e-20
ABI1	ELOVL5	0.0007884	4.699e-07
ABI1	EML4	3.764e-05	2.186e-16
ABI1	ENAH	0.0003287	2.746e-11
ABI1	ENPP5	7.441e-06	7.275e-06
ABI1	EPAS1	0.0004634	8.264e-09
ABI1	EPHB4	1.582e-06	7.703e-06
ABI1	EPS15	0.0006208	5.77e-20
ABI1	ERBB2IP	0.0002744	2.272e-18
ABI1	ERBB4	0.0003865	3.161e-12
ABI1	ERI1	0.004174	3.242e-07
ABI1	ESR1	0.008109	1.445e-12
ABI1	ETF1	2.932e-06	5.539e-13
ABI1	ETS1	0.0003269	4.553e-08
ABI1	EYA4	5.121e-07	1.433e-11
ABI1	FAM102A	0.001054	1.239e-06
ABI1	FAM126B	0.0002258	6.458e-18
ABI1	FAM171A1	0.0007817	5.349e-17
ABI1	FAM179B	0.003921	2.721e-22
ABI1	FAM190B	0.008662	1.542e-17
ABI1	FAM210A	0.0005376	6.779e-08
ABI1	FAM45A	0.001003	6.575e-10
ABI1	FAM60A	8.779e-05	1.737e-11
ABI1	FAM63B	0.001455	1.834e-18
ABI1	FAT1	0.007322	7.307e-08
ABI1	FAT4	0.0005587	2.282e-13
ABI1	FBXL17	0.0004545	1.017e-09
ABI1	FBXL3	0.0005171	2.728e-15
ABI1	FBXO11	0.000441	3.679e-20
ABI1	FBXO28	0.0001345	1.033e-14
ABI1	FBXO3	0.009641	2.015e-12
ABI1	FBXO33	0.001258	5.884e-10
ABI1	FBXW11	1.44e-07	8.396e-19
ABI1	FCHO2	0.00382	5.416e-20
ABI1	FEM1C	0.008218	1.775e-09
ABI1	FERMT2	0.001298	9.183e-12
ABI1	FGD4	4.59e-05	3.101e-21
ABI1	FILIP1L	0.002187	6.774e-13
ABI1	FOS	1.812e-05	4.285e-06
ABI1	FOXA1	4.482e-05	2.38e-11
ABI1	FOXJ2	0.003514	1.65e-10
ABI1	FOXJ3	0.00382	2.387e-10
ABI1	FOXP1	4.443e-06	2.738e-16
ABI1	FRMD6	0.0008029	4.484e-14
ABI1	FSTL1	0.006038	1.658e-10
ABI1	FUBP1	0.0003472	3.828e-06
ABI1	FUBP3	0.0003509	3.262e-14
ABI1	FYCO1	0.0002696	2.293e-14
ABI1	G3BP2	0.003993	9.884e-13
ABI1	GABRB2	0.002343	5.334e-13
ABI1	GALNT1	0.001788	4.921e-19
ABI1	GBF1	0.004174	2.054e-06
ABI1	GIT2	0.0003583	7.595e-14
ABI1	GJA1	0.001353	3.656e-13
ABI1	GLYR1	0.008955	7.42e-11
ABI1	GMFB	4.612e-05	1.298e-18
ABI1	GNS	0.0008749	1.115e-13
ABI1	GOSR1	0.00145	1.299e-09
ABI1	GPBP1	0.003601	6.846e-08
ABI1	GPR158	8.33e-05	4.438e-08
ABI1	GPR180	0.00324	4.921e-18
ABI1	GPR37	4.139e-06	3.47e-06
ABI1	GRM5	0.001437	1.582e-07
ABI1	GSK3B	3.669e-05	6.711e-18
ABI1	GTF2H1	5.335e-05	4.12e-13
ABI1	HAS2	0.009105	4.076e-07
ABI1	HBP1	0.0001942	2.092e-20
ABI1	HDAC9	0.0005141	1.956e-06
ABI1	HEY2	0.005456	1.411e-09
ABI1	HIAT1	6.251e-06	2.526e-22
ABI1	HIF1A	7.323e-06	2.158e-12
ABI1	HIVEP2	4.512e-05	1.051e-12
ABI1	HMGCS1	0.0005587	2.202e-10
ABI1	HNRNPH3	0.009105	3.618e-13
ABI1	HNRNPK	0.007337	4.342e-09
ABI1	HOOK3	0.0006021	3.752e-18
ABI1	HOXA3	0.001718	7.302e-11
ABI1	HOXA9	0.003039	6.277e-09
ABI1	HP1BP3	1.467e-05	1.7e-13
ABI1	HSPA8	8.681e-06	8.71e-11
ABI1	ID1	0.004069	1.052e-06
ABI1	IGF1	0.002278	4.055e-12
ABI1	IGF2BP1	0.0009331	2.845e-07
ABI1	IKZF4	0.002011	2.031e-12
ABI1	INO80	3.684e-05	6.361e-16
ABI1	INO80D	0.0001945	9.793e-15
ABI1	INTS6	0.004003	1.139e-11
ABI1	IREB2	0.001155	5.22e-19
ABI1	IRF2BPL	7.693e-05	4.211e-09
ABI1	ITCH	2.676e-05	2.434e-17
ABI1	ITGA11	0.00221	8.481e-07
ABI1	ITGA4	3.586e-05	1.579e-07
ABI1	ITGA6	0.001866	7.556e-11
ABI1	ITGB8	0.0001659	8.003e-08
ABI1	ITPRIPL2	0.0001252	1.82e-08
ABI1	JAK1	1.233e-06	1.339e-07
ABI1	JAZF1	9.69e-05	1.07e-13
ABI1	JHDM1D	0.004869	4.309e-18
ABI1	KAT2B	0.0001978	3.045e-09
ABI1	KBTBD2	0.0002413	2.865e-18
ABI1	KBTBD8	0.0001388	1.189e-11
ABI1	KCNJ10	1.103e-06	3.551e-08
ABI1	KCNK10	3.525e-05	3.62e-08
ABI1	KCTD3	0.008921	2.588e-06
ABI1	KDM2A	7.477e-08	4.309e-12
ABI1	KDM6A	0.0003532	5.427e-12
ABI1	KDM6B	1.467e-05	1.237e-06
ABI1	KHSRP	0.00836	1.221e-06
ABI1	KIAA0494	2.711e-05	6.987e-15
ABI1	KIAA0922	0.007375	7.569e-07
ABI1	KIAA1598	0.0006112	8.726e-09
ABI1	KIF13A	1.836e-05	8.649e-12
ABI1	KIF23	2.839e-05	3.984e-08
ABI1	KIF26B	0.0005641	1.044e-07
ABI1	KIF5B	0.00705	5.136e-14
ABI1	KIF5C	0.001845	1.114e-06
ABI1	KLF10	0.0008982	3.748e-11
ABI1	KLF11	0.003828	3.184e-10
ABI1	KLF3	0.002609	3.966e-16
ABI1	KLHL15	0.0004275	4.824e-18
ABI1	KLHL2	7.119e-07	1.343e-06
ABI1	KLHL9	0.0008749	5.09e-12
ABI1	KPNA2	0.0002455	1.049e-06
ABI1	KPNA3	0.00502	4.568e-17
ABI1	KPNA4	0.00502	7.959e-15
ABI1	KPNA6	0.00268	5.586e-08
ABI1	LACE1	0.0008115	4.922e-07
ABI1	LARP4B	4.816e-06	4.084e-23
ABI1	LASP1	0.0002743	7.281e-06
ABI1	LCLAT1	0.008305	9.562e-07
ABI1	LCOR	4.031e-06	5.023e-14
ABI1	LCORL	0.0006001	1.293e-14
ABI1	LIMA1	0.001154	1.405e-12
ABI1	LMNB1	0.001145	8.543e-08
ABI1	LPGAT1	0.000501	2.201e-12
ABI1	LPHN2	1.143e-05	1.824e-11
ABI1	LPHN3	0.0007028	1.445e-11
ABI1	LRCH1	3.915e-06	8.119e-16
ABI1	LRCH2	0.002187	2.516e-08
ABI1	LRP12	6.397e-06	3.672e-10
ABI1	LRP4	0.002693	8.15e-11
ABI1	LRRC1	0.002339	7.658e-07
ABI1	MACROD2	0.0004985	2.401e-06
ABI1	MAF	0.008414	1.367e-09
ABI1	MAGI1	2.19e-06	1.193e-13
ABI1	MAGI3	0.0006879	4.191e-11
ABI1	MAML3	0.001507	1.208e-08
ABI1	MAP1B	1.974e-05	1.053e-12
ABI1	MAP3K1	0.003539	2.738e-13
ABI1	MAP3K2	0.006794	5.06e-16
ABI1	MAP3K4	0.003267	3.026e-08
ABI1	MAP3K5	1.795e-06	3.598e-07
ABI1	MAP3K8	6.352e-06	1.083e-07
ABI1	MAP4K4	1.858e-07	1.91e-24
ABI1	MAP7	1.178e-05	8.941e-06
ABI1	MAPRE1	7.829e-05	1.668e-19
ABI1	MARCH1	5.735e-05	3.129e-08
ABI1	MARCH6	0.0003107	4.736e-11
ABI1	MAST4	9.629e-05	1.267e-09
ABI1	MASTL	1.078e-07	4.679e-13
ABI1	MAT2B	0.001451	1.485e-11
ABI1	MBNL1	0.0001864	3.586e-20
ABI1	MBNL3	0.009296	3.127e-11
ABI1	MBTD1	0.0005382	7.113e-16
ABI1	MCL1	0.00462	1.685e-12
ABI1	MECOM	1.867e-06	1.584e-10
ABI1	MED12L	3.122e-07	9.062e-09
ABI1	MEF2A	0.0001599	2.052e-12
ABI1	MET	0.0001526	3.429e-09
ABI1	MEX3B	4.252e-05	4.655e-08
ABI1	MFF	9.605e-06	7.358e-06
ABI1	MGAT2	1.457e-05	3.195e-08
ABI1	MGEA5	0.0004852	5.187e-16
ABI1	MIER3	0.000338	3.663e-20
ABI1	MITF	0.002721	5.706e-13
ABI1	MKRN1	0.0006911	1.602e-09
ABI1	MLL	3.217e-06	1.419e-19
ABI1	MLL2	0.006832	1.212e-11
ABI1	MLL5	0.002259	4.179e-17
ABI1	MOSPD2	0.008771	7.647e-12
ABI1	MPPED2	0.001623	1.824e-07
ABI1	MSL1	0.007405	1.877e-07
ABI1	MSMO1	1.613e-09	5.372e-06
ABI1	MTDH	0.006107	4.478e-14
ABI1	MTF1	2.254e-06	1.976e-12
ABI1	MTF2	1.903e-06	3.525e-11
ABI1	MTMR2	0.008771	8.732e-12
ABI1	MTMR9	0.001935	1.486e-09
ABI1	MXD1	1.067e-05	2.642e-06
ABI1	MYBL1	5.981e-05	4.912e-10
ABI1	MYNN	2.859e-05	2.987e-10
ABI1	MYT1L	9.934e-05	8.419e-06
ABI1	N4BP1	0.004201	5.794e-13
ABI1	NAA16	0.007876	4.416e-09
ABI1	NAA30	0.0001084	2.35e-13
ABI1	NAA50	0.008174	1.244e-15
ABI1	NABP1	0.0001179	9.006e-10
ABI1	NBEA	0.001204	4.161e-10
ABI1	NCKAP1	0.00436	1.382e-19
ABI1	NCOA1	0.004926	3.137e-06
ABI1	NCOA3	1.415e-05	1.004e-18
ABI1	NDEL1	0.002937	3.807e-11
ABI1	NEDD4L	0.0009331	9.513e-07
ABI1	NEK7	0.0007513	1.853e-18
ABI1	NFIA	0.0008497	2.471e-11
ABI1	NFIB	3.313e-05	1.258e-10
ABI1	NHLH1	7.758e-07	1.7e-06
ABI1	NHLH2	0.003049	1.304e-08
ABI1	NHS	0.003159	6.812e-09
ABI1	NHSL1	0.001446	2.583e-09
ABI1	NMT2	0.004948	3.836e-10
ABI1	NOL4	2.342e-07	2.716e-09
ABI1	NPAT	1.591e-07	1.107e-14
ABI1	NPC1	0.005251	1.913e-11
ABI1	NPTN	0.00994	1.125e-11
ABI1	NR3C2	0.002292	8.215e-08
ABI1	NRBF2	0.0007013	7.49e-13
ABI1	NRIP1	0.005941	3.202e-06
ABI1	NRP1	0.002585	8.429e-08
ABI1	NRP2	0.0003761	5.068e-14
ABI1	NRXN3	0.003523	6.088e-07
ABI1	NUCKS1	0.008926	4.55e-10
ABI1	NUFIP2	1.316e-05	1.142e-16
ABI1	NUMB	3.868e-05	1.87e-19
ABI1	ODZ1	0.0006751	3.765e-07
ABI1	ODZ3	0.003739	9.052e-13
ABI1	OTUD4	0.0002481	8.822e-19
ABI1	OXR1	0.007883	2.023e-17
ABI1	PAFAH1B1	0.001787	5.687e-17
ABI1	PAK7	0.00796	2.46e-08
ABI1	PALLD	0.0003434	1.62e-12
ABI1	PAPD5	0.001179	7.313e-17
ABI1	PAPOLG	0.009111	1.628e-15
ABI1	PAXIP1	0.0005587	8.295e-08
ABI1	PBX1	0.0005829	3.567e-10
ABI1	PCDH17	0.006205	3.954e-12
ABI1	PCDHAC1	7.139e-05	1.991e-06
ABI1	PCNP	2.792e-05	1.49e-18
ABI1	PDGFRA	0.0001913	9.168e-17
ABI1	PDIK1L	2.381e-05	8.119e-15
ABI1	PDS5A	0.0002744	2.721e-13
ABI1	PDS5B	0.004822	1.864e-17
ABI1	PGRMC2	0.001456	1.255e-09
ABI1	PHF14	0.005114	1.551e-08
ABI1	PHF17	0.001117	8.173e-06
ABI1	PHF20L1	0.001471	5.214e-19
ABI1	PHF3	0.0001888	4.918e-14
ABI1	PHF6	0.005853	3.315e-19
ABI1	PHYHIPL	0.001347	3.228e-11
ABI1	PJA2	0.002259	2.656e-22
ABI1	PKD2	0.007375	7.823e-10
ABI1	PKN2	0.0006975	1.936e-15
ABI1	PLCB1	2.106e-05	2.207e-07
ABI1	PLEKHA3	2.313e-06	1.322e-15
ABI1	PLEKHM1	0.004174	1.292e-10
ABI1	PNRC1	2.574e-05	9.624e-10
ABI1	PPARGC1A	0.002191	2.324e-09
ABI1	PPARGC1B	0.003374	2.311e-09
ABI1	PPM1A	0.001046	1.285e-18
ABI1	PPM1B	3.943e-05	1.491e-12
ABI1	PPM1D	0.006201	3.904e-07
ABI1	PPP1R15B	0.003319	1.402e-11
ABI1	PPP2R1B	0.006201	1.079e-06
ABI1	PPP3R1	0.0001978	4.572e-16
ABI1	PPP6R3	4.539e-05	5.058e-08
ABI1	PRICKLE2	0.00033	2.476e-13
ABI1	PRKAA1	0.000409	1.022e-09
ABI1	PRKAR1A	0.005903	2.016e-11
ABI1	PRKD3	0.003157	6.957e-16
ABI1	PRR14L	0.001749	3.387e-11
ABI1	PTEN	4.615e-06	3.123e-13
ABI1	PTHLH	0.0006021	5.217e-07
ABI1	PTP4A1	0.001237	3.065e-08
ABI1	PTPN13	0.005026	6.471e-10
ABI1	PTPN4	0.001718	4.984e-12
ABI1	PUM2	0.002259	1.914e-13
ABI1	PURA	0.0006458	5.892e-10
ABI1	PURB	2.697e-06	7.833e-08
ABI1	RAB10	0.008353	6.379e-23
ABI1	RAB12	7.07e-05	1.403e-08
ABI1	RAB30	0.001325	5.807e-13
ABI1	RAB5B	0.002186	2.401e-16
ABI1	RAB5C	0.008291	5.134e-08
ABI1	RAB8B	0.003751	7.445e-14
ABI1	RABEP1	0.0004552	3.791e-16
ABI1	RABGAP1	0.001992	1.361e-12
ABI1	RACGAP1	5.401e-05	2.061e-08
ABI1	RAD21	0.0001484	5.784e-11
ABI1	RALBP1	0.0002571	2.894e-11
ABI1	RAP2C	1.17e-06	1.18e-09
ABI1	RAPGEF4	1.092e-06	9.316e-09
ABI1	RARB	7.512e-07	1.019e-07
ABI1	RASSF2	0.008921	7.504e-08
ABI1	RB1	8.659e-06	6.169e-17
ABI1	RBL2	3.342e-05	7.5e-21
ABI1	RBM17	0.00819	1.417e-10
ABI1	RBM24	0.0003711	4.068e-07
ABI1	RBM25	7.426e-06	3.521e-13
ABI1	RBM26	0.0006282	2.016e-13
ABI1	RBM27	0.003944	8.139e-22
ABI1	RCOR1	0.0003865	6.799e-15
ABI1	RECK	0.002507	1.482e-07
ABI1	REEP1	0.00777	1.657e-07
ABI1	REST	0.00108	2.865e-18
ABI1	REV3L	0.004589	1.538e-12
ABI1	RFFL	0.001231	1.219e-07
ABI1	RFX7	0.0002188	1.812e-15
ABI1	RIN2	0.003969	8.374e-07
ABI1	RLIM	0.0001346	2.612e-18
ABI1	RNF115	5.45e-05	2.305e-08
ABI1	RNF13	0.0003987	7.537e-14
ABI1	RNF138	0.006531	6.883e-15
ABI1	RNF145	4.233e-16	1.391e-12
ABI1	RNF19A	8.5e-06	3.203e-12
ABI1	RNF2	0.0005175	7.132e-11
ABI1	RNF216	0.004432	7.185e-06
ABI1	RNF219	0.007981	2.468e-08
ABI1	RNF6	0.006204	2.126e-11
ABI1	ROBO1	0.0001291	2.292e-12
ABI1	ROCK2	0.004256	8.593e-15
ABI1	RORA	0.0006138	3.69e-19
ABI1	RPS6KA3	0.000458	1.016e-17
ABI1	RPS6KA5	0.002552	1.841e-13
ABI1	RRAGD	6.992e-05	1.228e-08
ABI1	RREB1	0.00323	6.7e-15
ABI1	RUNX1	0.004853	3.662e-08
ABI1	RUNX2	3.187e-05	8.759e-15
ABI1	RUNX3	8.366e-05	1.124e-07
ABI1	RYBP	1e-07	7.054e-18
ABI1	S1PR1	0.007847	1.18e-07
ABI1	SACS	0.001131	5.274e-13
ABI1	SALL1	0.003622	8.165e-12
ABI1	SATB1	9.442e-06	2.463e-09
ABI1	SBF2	0.004862	1.418e-15
ABI1	SBNO1	0.002042	7.743e-11
ABI1	SCAI	0.002583	3.467e-08
ABI1	SCML2	0.000112	3.909e-07
ABI1	SCN3A	0.002588	1.526e-09
ABI1	SEC23IP	0.0003371	1.521e-11
ABI1	SEPT7	0.003739	1.995e-19
ABI1	SERINC3	0.0003557	7.175e-13
[truncated: 473,895+ more rows]
