# Supplementary material for: Cupid: simultaneous reconstruction of microRNA-target and ceRNA networks
Source: HighWire-hosted journal article supplement (doi:10.1101/gr.178194.114), 2014-11-05
Supplement: Table_S6.xlsx [file Table_S6.xlsx]

## Sheet: Verified Interactions
	CCND1	ESR1	HIF1A	PDGFRA
has-miR-16-5p	1,2,3		1			Label	Database	Web Site
has-miR-17-5p	1,2,3	1	1,3			1	miRWalk	http://www.umm.uni-heidelberg.de/apps/zmf/mirwalk/
has-miR-18a-5p		1,2,3	1,2,3			2	miRTarBase	http://mirtarbase.mbc.nctu.edu.tw/
has-miR-18b-5p		1,2				3	miRecords	http://mirecords.biolead.org/
has-miR-22-5p		1
has-miR-33b-5p	1
has-miR-34b-5p	1,2
has-miR-93-5p
has-miR-106b-5p	1,2
has-miR-130a-3p		1,2
has-miR-130b-3p			1
has-miR-130b-5p			1
has-miR-148a-3p
has-miR-217	1
has-miR-221-3p	1	1,2,3		1
has-miR-222-3p		1,2,3	1	1
has-miR-301a-3p
has-miR-381
has-miR-452-3p
has-miR-557
has-miR-589-3p
