# Supplementary material for: Cupid: simultaneous reconstruction of microRNA-target and ceRNA networks
Source: HighWire-hosted journal article supplement (doi:10.1101/gr.178194.114), 2014-11-05
Supplement: Table_S7.xlsx [file Table_S7.xlsx]

## Sheet: MiRNA modules
Gene Symbol	Num Module	Module
A1CF	1	[hsa-miR-15a-5p;hsa-miR-16-5p]
A2LD1	7	[hsa-miR-106a-5p;hsa-miR-3688-3p][hsa-miR-106a-5p;hsa-miR-3688-3p;hsa-miR-93-3p][hsa-miR-17-5p;hsa-miR-3688-3p][hsa-miR-17-5p;hsa-miR-3688-3p;hsa-miR-93-3p][hsa-miR-17-5p;hsa-miR-548f;hsa-miR-944][hsa-miR-3688-3p;hsa-miR-548f][hsa-miR-548f;hsa-miR-944]
A2ML1	2	[hsa-miR-17-5p;hsa-miR-3679-3p][hsa-miR-17-5p;hsa-miR-504]
AADAT	5	[hsa-miR-150-5p;hsa-miR-224-5p][hsa-miR-16-5p;hsa-miR-224-5p;hsa-miR-99b-3p][hsa-miR-186-3p;hsa-miR-224-5p;hsa-miR-99b-3p][hsa-miR-224-5p;hsa-miR-577][hsa-miR-224-5p;hsa-miR-99b-3p]
AAK1	6	[hsa-miR-106b-5p;hsa-miR-203][hsa-miR-106b-5p;hsa-miR-3928][hsa-miR-20b-5p;hsa-miR-28-5p;hsa-miR-3609][hsa-miR-28-5p;hsa-miR-3609][hsa-miR-3609;hsa-miR-3651][hsa-miR-3651;hsa-miR-766-3p]
AAMP	6	[hsa-miR-103a-2-5p;hsa-miR-4284;hsa-miR-708-3p][hsa-miR-24-3p;hsa-miR-34c-5p][hsa-miR-3153;hsa-miR-4284;hsa-miR-708-3p][hsa-miR-329;hsa-miR-4284][hsa-miR-329;hsa-miR-708-3p][hsa-miR-4284;hsa-miR-708-3p]
AARS	4	[hsa-miR-2355-3p;hsa-miR-26b-3p;hsa-miR-942][hsa-miR-2355-3p;hsa-miR-942][hsa-miR-26b-3p;hsa-miR-581;hsa-miR-942][hsa-miR-26b-3p;hsa-miR-942]
AASDHPPT	7	[hsa-miR-16-2-3p;hsa-miR-181b-5p][hsa-miR-16-2-3p;hsa-miR-181b-5p;hsa-miR-221-5p][hsa-miR-16-2-3p;hsa-miR-181b-5p;hsa-miR-30a-3p][hsa-miR-16-2-3p;hsa-miR-181b-5p;hsa-miR-30e-3p][hsa-miR-181b-5p;hsa-miR-30d-3p;hsa-miR-526b-5p][hsa-miR-181b-5p;hsa-miR-526b-5p][hsa-miR-204-5p;hsa-miR-526b-5p]
AATK	8	[hsa-miR-182-5p;hsa-miR-196a-3p][hsa-miR-182-5p;hsa-miR-196a-3p;hsa-miR-9-5p][hsa-miR-182-5p;hsa-miR-3942-5p][hsa-miR-182-5p;hsa-miR-3942-5p;hsa-miR-424-5p][hsa-miR-182-5p;hsa-miR-9-5p][hsa-miR-182-5p;hsa-miR-9-5p;hsa-miR-92a-3p][hsa-miR-196a-3p;hsa-miR-25-3p;hsa-miR-424-5p][hsa-miR-196a-3p;hsa-miR-424-5p]
ABAT	8	[hsa-miR-135a-5p;hsa-miR-505-5p][hsa-miR-135b-5p;hsa-miR-340-5p;hsa-miR-374b-5p][hsa-miR-135b-5p;hsa-miR-374b-5p][hsa-miR-135b-5p;hsa-miR-374b-5p;hsa-miR-409-5p][hsa-miR-135b-5p;hsa-miR-409-5p][hsa-miR-2355-5p;hsa-miR-3653;hsa-miR-505-5p][hsa-miR-2355-5p;hsa-miR-505-5p][hsa-miR-505-5p;hsa-miR-96-5p]
ABCA1	4	[hsa-let-7a-3p;hsa-miR-128;hsa-miR-200c-3p][hsa-let-7a-3p;hsa-miR-142-3p][hsa-miR-101-3p;hsa-miR-17-5p;hsa-miR-199a-5p][hsa-miR-148a-3p;hsa-miR-26a-5p;hsa-miR-3614-5p]
ABCA10	3	[hsa-miR-33a-3p;hsa-miR-374a-3p;hsa-miR-548d-3p][hsa-miR-33a-3p;hsa-miR-548d-3p][hsa-miR-374a-3p;hsa-miR-548d-3p]
ABCA12	4	[hsa-miR-1262;hsa-miR-15b-5p;hsa-miR-20b-3p][hsa-miR-15b-5p;hsa-miR-20b-3p][hsa-miR-15b-5p;hsa-miR-20b-3p;hsa-miR-3157-5p][hsa-miR-21-3p;hsa-miR-214-5p]
ABCA13	6	[hsa-miR-24-3p;hsa-miR-28-5p;hsa-miR-550a-5p][hsa-miR-24-3p;hsa-miR-3607-5p][hsa-miR-24-3p;hsa-miR-3607-5p;hsa-miR-550a-5p][hsa-miR-24-3p;hsa-miR-550a-5p][hsa-miR-28-5p;hsa-miR-500b;hsa-miR-636][hsa-miR-28-5p;hsa-miR-7-5p]
ABCA2	2	[hsa-miR-330-3p;hsa-miR-506-3p][hsa-miR-3910;hsa-miR-506-3p]
ABCA5	4	[hsa-miR-1237;hsa-miR-452-3p;hsa-miR-580][hsa-miR-19a-3p;hsa-miR-3200-5p;hsa-miR-452-3p][hsa-miR-19a-3p;hsa-miR-452-3p][hsa-miR-19a-3p;hsa-miR-452-3p;hsa-miR-580]
ABCA8	2	[hsa-miR-154-3p;hsa-miR-487a;hsa-miR-589-3p][hsa-miR-487a;hsa-miR-589-3p]
ABCA9	3	[hsa-miR-105-5p;hsa-miR-1185-5p][hsa-miR-105-5p;hsa-miR-1185-5p;hsa-miR-3910][hsa-miR-105-5p;hsa-miR-3605-5p]
ABCB1	1	[hsa-miR-338-5p;hsa-miR-455-3p]
ABCB10	3	[hsa-miR-19a-5p;hsa-miR-335-3p;hsa-miR-548f][hsa-miR-19b-1-5p;hsa-miR-335-3p;hsa-miR-548e][hsa-miR-335-3p;hsa-miR-548f]
ABCB5	7	[hsa-miR-130a-3p;hsa-miR-454-3p][hsa-miR-130a-3p;hsa-miR-454-3p;hsa-miR-488-5p][hsa-miR-130a-3p;hsa-miR-454-3p;hsa-miR-577][hsa-miR-130b-3p;hsa-miR-454-3p;hsa-miR-488-5p][hsa-miR-218-1-3p;hsa-miR-454-3p;hsa-miR-488-5p][hsa-miR-218-1-3p;hsa-miR-488-5p][hsa-miR-454-3p;hsa-miR-488-5p]
ABCB6	2	[hsa-miR-29a-3p;hsa-miR-29b-3p;hsa-miR-767-5p][hsa-miR-29a-3p;hsa-miR-29c-3p;hsa-miR-767-5p]
ABCB9	5	[hsa-let-7c;hsa-miR-27a-3p;hsa-miR-98][hsa-let-7c;hsa-miR-27b-3p;hsa-miR-98][hsa-let-7c;hsa-miR-98][hsa-let-7d-5p;hsa-miR-221-5p;hsa-miR-24-3p][hsa-let-7d-5p;hsa-miR-24-3p;hsa-miR-98]
ABCC1	3	[hsa-miR-224-5p;hsa-miR-34b-5p][hsa-miR-224-5p;hsa-miR-520d-5p][hsa-miR-3613-3p;hsa-miR-520d-5p]
ABCC10	6	[hsa-let-7b-5p;hsa-let-7c][hsa-let-7b-5p;hsa-let-7c;hsa-miR-655][hsa-let-7b-5p;hsa-let-7c;hsa-miR-98][hsa-let-7e-5p;hsa-miR-374a-3p;hsa-miR-98][hsa-let-7f-5p;hsa-miR-374a-3p][hsa-miR-374a-3p;hsa-miR-655;hsa-miR-98]
ABCC11	1	[hsa-miR-2115-5p;hsa-miR-3163]
ABCC12	6	[hsa-miR-1269a;hsa-miR-508-5p;hsa-miR-548t-5p][hsa-miR-1269a;hsa-miR-548t-5p][hsa-miR-197-3p;hsa-miR-34c-5p;hsa-miR-616-3p][hsa-miR-30b-3p;hsa-miR-34c-5p;hsa-miR-616-3p][hsa-miR-338-3p;hsa-miR-34c-5p;hsa-miR-616-3p][hsa-miR-34c-5p;hsa-miR-616-3p]
ABCC3	1	[hsa-miR-18b-5p;hsa-miR-338-3p;hsa-miR-3622a-3p]
ABCC4	8	[hsa-miR-128;hsa-miR-532-5p;hsa-miR-744-3p][hsa-miR-1297;hsa-miR-532-5p][hsa-miR-27a-3p;hsa-miR-532-5p;hsa-miR-744-3p][hsa-miR-27b-3p;hsa-miR-532-5p;hsa-miR-744-3p][hsa-miR-299-5p;hsa-miR-532-5p][hsa-miR-3130-3p;hsa-miR-532-5p;hsa-miR-744-3p][hsa-miR-532-5p;hsa-miR-676-5p;hsa-miR-744-3p][hsa-miR-532-5p;hsa-miR-744-3p]
ABCC5	7	[hsa-let-7g-3p;hsa-miR-18a-5p][hsa-miR-122-3p;hsa-miR-18a-5p;hsa-miR-339-3p][hsa-miR-18a-5p;hsa-miR-26a-5p;hsa-miR-3943][hsa-miR-18a-5p;hsa-miR-26a-5p;hsa-miR-449b-5p][hsa-miR-18a-5p;hsa-miR-339-3p][hsa-miR-18a-5p;hsa-miR-339-3p;hsa-miR-502-5p][hsa-miR-18a-5p;hsa-miR-339-3p;hsa-miR-520a-5p]
ABCC8	4	[hsa-miR-1258;hsa-miR-140-5p][hsa-miR-1258;hsa-miR-140-5p;hsa-miR-19b-1-5p][hsa-miR-223-5p;hsa-miR-3680-3p][hsa-miR-3919;hsa-miR-582-5p]
ABCC9	3	[hsa-miR-19a-3p;hsa-miR-452-5p][hsa-miR-217;hsa-miR-452-5p][hsa-miR-3607-3p;hsa-miR-452-5p]
ABCD1	1	[hsa-miR-1248;hsa-miR-9-5p;hsa-miR-96-5p]
ABCD2	4	[hsa-miR-155-5p;hsa-miR-223-5p][hsa-miR-155-5p;hsa-miR-223-5p;hsa-miR-431-5p][hsa-miR-155-5p;hsa-miR-431-5p][hsa-miR-223-5p;hsa-miR-3614-5p;hsa-miR-431-5p]
ABCD3	8	[hsa-miR-126-5p;hsa-miR-135b-5p;hsa-miR-22-5p][hsa-miR-135b-5p;hsa-miR-152][hsa-miR-135b-5p;hsa-miR-152;hsa-miR-515-3p][hsa-miR-135b-5p;hsa-miR-152;hsa-miR-582-5p][hsa-miR-135b-5p;hsa-miR-19a-3p;hsa-miR-22-5p][hsa-miR-135b-5p;hsa-miR-22-5p][hsa-miR-135b-5p;hsa-miR-22-5p;hsa-miR-374a-5p][hsa-miR-135b-5p;hsa-miR-22-5p;hsa-miR-576-5p]
ABCE1	7	[hsa-miR-105-5p;hsa-miR-1297][hsa-miR-105-5p;hsa-miR-135a-5p][hsa-miR-105-5p;hsa-miR-193b-5p][hsa-miR-105-5p;hsa-miR-3613-3p][hsa-miR-193b-5p;hsa-miR-203][hsa-miR-203;hsa-miR-29c-3p;hsa-miR-548t-5p][hsa-miR-29c-3p;hsa-miR-548t-5p]
ABCF2	5	[hsa-miR-130b-5p;hsa-miR-548e][hsa-miR-16-5p;hsa-miR-378a-3p;hsa-miR-767-3p][hsa-miR-16-5p;hsa-miR-503][hsa-miR-222-5p;hsa-miR-548x-3p][hsa-miR-636;hsa-miR-767-3p]
ABCF3	3	[hsa-miR-15b-5p;hsa-miR-16-5p;hsa-miR-195-5p][hsa-miR-15b-5p;hsa-miR-195-5p][hsa-miR-195-5p;hsa-miR-224-5p]
ABCG2	6	[hsa-miR-103a-2-5p;hsa-miR-106a-5p][hsa-miR-103a-2-5p;hsa-miR-106a-5p;hsa-miR-1185-5p][hsa-miR-106a-5p;hsa-miR-1185-5p;hsa-miR-520a-3p][hsa-miR-106a-5p;hsa-miR-154-3p;hsa-miR-17-5p][hsa-miR-106a-5p;hsa-miR-17-5p][hsa-miR-519d;hsa-miR-520a-3p;hsa-miR-520h]
ABCG4	6	[hsa-miR-106b-5p;hsa-miR-212-3p][hsa-miR-212-3p;hsa-miR-216a;hsa-miR-223-3p][hsa-miR-212-3p;hsa-miR-302c-3p][hsa-miR-216a;hsa-miR-25-3p;hsa-miR-9-5p][hsa-miR-216a;hsa-miR-9-5p][hsa-miR-25-3p;hsa-miR-92a-3p]
ABCG5	1	[hsa-miR-192-5p;hsa-miR-3200-3p]
ABCG8	3	[hsa-miR-1227;hsa-miR-181a-2-3p;hsa-miR-511][hsa-miR-132-5p;hsa-miR-20a-3p][hsa-miR-509-5p;hsa-miR-511]
ABHD10	4	[hsa-miR-1248;hsa-miR-499a-3p][hsa-miR-1248;hsa-miR-499a-3p;hsa-miR-607][hsa-miR-369-3p;hsa-miR-491-3p][hsa-miR-369-3p;hsa-miR-491-3p;hsa-miR-607]
ABHD12	2	[hsa-miR-135b-3p;hsa-miR-216a][hsa-miR-135b-3p;hsa-miR-26a-5p;hsa-miR-30e-3p]
ABHD12B	1	[hsa-miR-499a-3p;hsa-miR-765]
ABHD13	7	[hsa-miR-153;hsa-miR-223-3p;hsa-miR-33a-5p][hsa-miR-153;hsa-miR-33a-5p][hsa-miR-25-3p;hsa-miR-340-5p][hsa-miR-33a-5p;hsa-miR-539-5p;hsa-miR-607][hsa-miR-33a-5p;hsa-miR-607][hsa-miR-3662;hsa-miR-92a-3p][hsa-miR-668;hsa-miR-92a-3p]
ABHD14B	5	[hsa-miR-20a-3p;hsa-miR-223-3p;hsa-miR-576-5p][hsa-miR-20a-3p;hsa-miR-25-3p;hsa-miR-576-5p][hsa-miR-20a-3p;hsa-miR-576-5p][hsa-miR-223-3p;hsa-miR-25-3p;hsa-miR-576-5p][hsa-miR-223-3p;hsa-miR-576-5p]
ABHD15	3	[hsa-miR-1304-5p;hsa-miR-135a-5p;hsa-miR-135b-5p][hsa-miR-1304-5p;hsa-miR-135b-5p][hsa-miR-135a-5p;hsa-miR-135b-5p]
ABHD16A	4	[hsa-miR-126-5p;hsa-miR-411-5p][hsa-miR-135a-5p;hsa-miR-26b-5p][hsa-miR-135a-5p;hsa-miR-944][hsa-miR-380-3p;hsa-miR-944]
ABHD2	7	[hsa-miR-106a-5p;hsa-miR-181a-3p;hsa-miR-584-5p][hsa-miR-181a-3p;hsa-miR-584-5p][hsa-miR-181a-3p;hsa-miR-584-5p;hsa-miR-616-5p][hsa-miR-1;hsa-miR-181a-3p;hsa-miR-584-5p][hsa-miR-301a-3p;hsa-miR-708-3p][hsa-miR-30a-5p;hsa-miR-30c-5p;hsa-miR-708-3p][hsa-miR-30a-5p;hsa-miR-708-3p]
ABHD3	9	[hsa-let-7a-2-3p;hsa-miR-221-3p;hsa-miR-425-3p][hsa-miR-10a-5p;hsa-miR-221-3p][hsa-miR-10a-5p;hsa-miR-221-3p;hsa-miR-378c][hsa-miR-10a-5p;hsa-miR-221-3p;hsa-miR-382-5p][hsa-miR-10a-5p;hsa-miR-221-3p;hsa-miR-520c-3p][hsa-miR-129-5p;hsa-miR-187-5p;hsa-miR-221-3p][hsa-miR-130a-3p;hsa-miR-221-3p][hsa-miR-187-5p;hsa-miR-221-3p][hsa-miR-221-3p;hsa-miR-425-3p]
ABHD4	7	[hsa-miR-130a-3p;hsa-miR-222-5p][hsa-miR-130a-3p;hsa-miR-222-5p;hsa-miR-664-5p][hsa-miR-199b-3p;hsa-miR-222-5p][hsa-miR-199b-3p;hsa-miR-222-5p;hsa-miR-3928][hsa-miR-222-5p;hsa-miR-3065-3p;hsa-miR-505-5p][hsa-miR-222-5p;hsa-miR-378a-3p;hsa-miR-454-3p][hsa-miR-222-5p;hsa-miR-505-5p]
ABHD5	7	[hsa-miR-140-5p;hsa-miR-29a-3p][hsa-miR-140-5p;hsa-miR-29a-3p;hsa-miR-29c-3p][hsa-miR-140-5p;hsa-miR-29a-3p;hsa-miR-548q][hsa-miR-19a-3p;hsa-miR-19b-3p][hsa-miR-19b-3p;hsa-miR-29a-3p;hsa-miR-3074-3p][hsa-miR-29a-3p;hsa-miR-3074-3p][hsa-miR-29a-3p;hsa-miR-548q]
ABHD6	8	[hsa-miR-125a-5p;hsa-miR-191-5p;hsa-miR-664-3p][hsa-miR-125a-5p;hsa-miR-432-5p;hsa-miR-664-3p][hsa-miR-125a-5p;hsa-miR-486-3p;hsa-miR-664-3p][hsa-miR-125a-5p;hsa-miR-500a-5p;hsa-miR-664-3p][hsa-miR-125a-5p;hsa-miR-664-3p][hsa-miR-191-5p;hsa-miR-449a][hsa-miR-3200-5p;hsa-miR-584-5p;hsa-miR-664-3p][hsa-miR-3200-5p;hsa-miR-664-3p]
ABHD8	4	[hsa-let-7a-2-3p;hsa-let-7g-3p][hsa-let-7a-2-3p;hsa-let-7g-3p;hsa-miR-7-5p][hsa-let-7a-2-3p;hsa-miR-143-3p;hsa-miR-7-5p][hsa-let-7a-2-3p;hsa-miR-7-5p]
ABI1	7	[hsa-miR-181d;hsa-miR-29c-3p;hsa-miR-3619-5p][hsa-miR-188-3p;hsa-miR-208b;hsa-miR-641][hsa-miR-188-3p;hsa-miR-2114-5p;hsa-miR-29c-3p][hsa-miR-188-3p;hsa-miR-3679-3p;hsa-miR-641][hsa-miR-188-3p;hsa-miR-641][hsa-miR-2114-5p;hsa-miR-29c-3p][hsa-miR-29c-3p;hsa-miR-3619-5p]
ABI2	7	[hsa-miR-106b-5p;hsa-miR-148a-5p][hsa-miR-106b-5p;hsa-miR-148a-5p;hsa-miR-183-5p][hsa-miR-106b-5p;hsa-miR-148a-5p;hsa-miR-193a-3p][hsa-miR-106b-5p;hsa-miR-148a-5p;hsa-miR-195-5p][hsa-miR-106b-5p;hsa-miR-148a-5p;hsa-miR-7-5p][hsa-miR-148a-5p;hsa-miR-362-5p;hsa-miR-429][hsa-miR-148a-5p;hsa-miR-429]
ABI3	6	[hsa-miR-16-5p;hsa-miR-195-5p;hsa-miR-615-5p][hsa-miR-16-5p;hsa-miR-424-5p;hsa-miR-615-5p][hsa-miR-16-5p;hsa-miR-615-5p][hsa-miR-195-5p;hsa-miR-424-5p][hsa-miR-3619-5p;hsa-miR-615-5p][hsa-miR-424-5p;hsa-miR-615-5p]
ABI3BP	7	[hsa-let-7a-3p;hsa-let-7b-3p;hsa-miR-654-5p][hsa-let-7a-3p;hsa-let-7f-1-3p][hsa-let-7a-3p;hsa-let-7f-1-3p;hsa-miR-654-5p][hsa-let-7a-3p;hsa-miR-30a-5p;hsa-miR-654-5p][hsa-let-7a-3p;hsa-miR-541-3p;hsa-miR-654-5p][hsa-let-7a-3p;hsa-miR-654-5p][hsa-let-7a-3p;hsa-miR-654-5p;hsa-miR-664-3p]
ABL1	5	[hsa-miR-148a-3p;hsa-miR-548d-3p][hsa-miR-190a;hsa-miR-29a-5p;hsa-miR-31-3p][hsa-miR-224-3p;hsa-miR-548d-3p;hsa-miR-873-5p][hsa-miR-29a-5p;hsa-miR-31-3p][hsa-miR-29a-5p;hsa-miR-31-3p;hsa-miR-3654]
ABL2	8	[hsa-let-7i-5p;hsa-miR-137;hsa-miR-93-5p][hsa-let-7i-5p;hsa-miR-93-5p][hsa-miR-107;hsa-miR-363-3p;hsa-miR-93-5p][hsa-miR-107;hsa-miR-93-5p][hsa-miR-16-5p;hsa-miR-363-3p][hsa-miR-26a-5p;hsa-miR-93-5p][hsa-miR-26b-5p;hsa-miR-4306;hsa-miR-93-5p][hsa-miR-4306;hsa-miR-93-5p]
ABLIM2	1	[hsa-miR-135b-3p;hsa-miR-3605-5p;hsa-miR-548d-3p]
ABLIM3	6	[hsa-miR-129-1-3p;hsa-miR-190b][hsa-miR-186-5p;hsa-miR-3150b-3p][hsa-miR-30a-3p;hsa-miR-449b-5p][hsa-miR-30a-3p;hsa-miR-449b-5p;hsa-miR-7-1-3p][hsa-miR-30a-3p;hsa-miR-549][hsa-miR-338-3p;hsa-miR-455-5p]
ABR	7	[hsa-miR-132-5p;hsa-miR-31-5p][hsa-miR-19a-3p;hsa-miR-19b-1-5p;hsa-miR-299-5p][hsa-miR-19a-3p;hsa-miR-224-5p;hsa-miR-299-5p][hsa-miR-19a-3p;hsa-miR-299-5p][hsa-miR-19a-3p;hsa-miR-374b-5p][hsa-miR-19a-5p;hsa-miR-369-3p;hsa-miR-374a-5p][hsa-miR-369-3p;hsa-miR-374a-5p]
ABRACL	7	[hsa-miR-105-5p;hsa-miR-378a-5p;hsa-miR-539-5p][hsa-miR-148a-5p;hsa-miR-539-5p;hsa-miR-556-3p][hsa-miR-3168;hsa-miR-378a-5p;hsa-miR-539-5p][hsa-miR-378a-5p;hsa-miR-520d-5p;hsa-miR-539-5p][hsa-miR-378a-5p;hsa-miR-539-5p][hsa-miR-378a-5p;hsa-miR-539-5p;hsa-miR-944][hsa-miR-539-5p;hsa-miR-556-3p]
ABT1	3	[hsa-let-7f-5p;hsa-let-7g-5p;hsa-miR-98][hsa-let-7g-5p;hsa-miR-98][hsa-let-7i-5p;hsa-miR-98]
ABTB1	2	[hsa-miR-125a-5p;hsa-miR-137;hsa-miR-744-3p][hsa-miR-137;hsa-miR-744-3p]
ABTB2	5	[hsa-let-7a-2-3p;hsa-let-7g-3p;hsa-miR-549][hsa-let-7a-2-3p;hsa-let-7g-3p;hsa-miR-577][hsa-let-7g-3p;hsa-miR-154-3p;hsa-miR-577][hsa-let-7g-3p;hsa-miR-338-5p;hsa-miR-577][hsa-let-7g-3p;hsa-miR-577;hsa-miR-589-5p]
ACAA2	7	[hsa-miR-124-3p;hsa-miR-196a-3p][hsa-miR-124-3p;hsa-miR-196a-3p;hsa-miR-31-5p][hsa-miR-124-3p;hsa-miR-196a-3p;hsa-miR-506-3p][hsa-miR-124-3p;hsa-miR-31-5p][hsa-miR-124-3p;hsa-miR-31-5p;hsa-miR-506-3p][hsa-miR-124-3p;hsa-miR-506-3p][hsa-miR-196a-3p;hsa-miR-506-3p]
ACACA	8	[hsa-miR-15b-5p;hsa-miR-200b-3p;hsa-miR-3065-3p][hsa-miR-16-5p;hsa-miR-29a-3p][hsa-miR-200b-3p;hsa-miR-29b-3p][hsa-miR-200b-3p;hsa-miR-3065-3p][hsa-miR-29a-3p;hsa-miR-3065-3p;hsa-miR-421][hsa-miR-29a-3p;hsa-miR-421][hsa-miR-29a-3p;hsa-miR-512-3p][hsa-miR-29a-3p;hsa-miR-512-3p;hsa-miR-767-5p]
ACACB	2	[hsa-miR-128;hsa-miR-1293;hsa-miR-452-5p][hsa-miR-128;hsa-miR-452-5p]
ACAN	7	[hsa-miR-142-5p;hsa-miR-24-3p;hsa-miR-516a-5p][hsa-miR-142-5p;hsa-miR-516a-5p;hsa-miR-519a-5p][hsa-miR-18a-5p;hsa-miR-516a-5p;hsa-miR-519a-5p][hsa-miR-24-3p;hsa-miR-511;hsa-miR-516a-5p][hsa-miR-24-3p;hsa-miR-516a-5p][hsa-miR-24-3p;hsa-miR-516a-5p;hsa-miR-519a-5p][hsa-miR-516a-5p;hsa-miR-519a-5p]
ACAP2	7	[hsa-miR-105-5p;hsa-miR-28-3p][hsa-miR-105-5p;hsa-miR-28-3p;hsa-miR-758][hsa-miR-181c-5p;hsa-miR-758][hsa-miR-27a-3p;hsa-miR-28-3p][hsa-miR-28-3p;hsa-miR-590-3p;hsa-miR-96-5p][hsa-miR-28-3p;hsa-miR-96-5p][hsa-miR-3910;hsa-miR-519c-3p]
ACAP3	6	[hsa-let-7d-5p;hsa-let-7f-5p][hsa-let-7d-5p;hsa-miR-22-5p][hsa-let-7d-5p;hsa-miR-22-5p;hsa-miR-98][hsa-let-7d-5p;hsa-miR-758;hsa-miR-98][hsa-let-7d-5p;hsa-miR-98][hsa-miR-1294;hsa-miR-153]
ACAT2	4	[hsa-miR-1269a;hsa-miR-509-3p][hsa-miR-1269a;hsa-miR-509-3p;hsa-miR-548b-5p][hsa-miR-509-3p;hsa-miR-548b-5p][hsa-miR-548b-5p;hsa-miR-548k]
ACBD3	7	[hsa-miR-101-3p;hsa-miR-3128][hsa-miR-101-3p;hsa-miR-33b-3p][hsa-miR-101-3p;hsa-miR-33b-3p;hsa-miR-512-3p][hsa-miR-101-3p;hsa-miR-34a-5p][hsa-miR-101-3p;hsa-miR-548t-5p][hsa-miR-16-1-3p;hsa-miR-421][hsa-miR-222-5p;hsa-miR-550a-5p]
ACBD4	1	[hsa-miR-22-5p;hsa-miR-3606]
ACBD5	7	[hsa-miR-130a-3p;hsa-miR-30c-5p;hsa-miR-545-3p][hsa-miR-130a-3p;hsa-miR-30e-5p;hsa-miR-545-3p][hsa-miR-130a-3p;hsa-miR-454-3p][hsa-miR-130a-3p;hsa-miR-545-3p][hsa-miR-199a-3p;hsa-miR-935][hsa-miR-301a-3p;hsa-miR-935][hsa-miR-3662;hsa-miR-935]
ACBD6	3	[hsa-miR-323b-3p;hsa-miR-505-3p][hsa-miR-323b-3p;hsa-miR-505-3p;hsa-miR-584-5p][hsa-miR-3926;hsa-miR-548s]
ACBD7	1	[hsa-miR-135b-5p;hsa-miR-455-5p]
ACD	2	[hsa-miR-1976;hsa-miR-3648][hsa-miR-1976;hsa-miR-3648;hsa-miR-548x-3p]
ACE2	2	[hsa-miR-3143;hsa-miR-511][hsa-miR-3187-3p;hsa-miR-502-5p;hsa-miR-511]
ACER2	6	[hsa-let-7a-5p;hsa-miR-125b-5p][hsa-let-7d-5p;hsa-miR-16-1-3p;hsa-miR-196a-5p][hsa-let-7g-5p;hsa-miR-125a-5p][hsa-let-7g-5p;hsa-miR-16-1-3p][hsa-miR-16-1-3p;hsa-miR-196a-5p][hsa-miR-544b;hsa-miR-98]
ACER3	1	[hsa-miR-1304-5p;hsa-miR-20a-3p;hsa-miR-98]
ACHE	8	[hsa-miR-140-5p;hsa-miR-503;hsa-miR-766-3p][hsa-miR-142-3p;hsa-miR-152][hsa-miR-142-3p;hsa-miR-212-3p][hsa-miR-142-3p;hsa-miR-212-3p;hsa-miR-767-5p][hsa-miR-199a-5p;hsa-miR-503;hsa-miR-766-3p][hsa-miR-3917;hsa-miR-766-3p][hsa-miR-503;hsa-miR-766-3p][hsa-miR-509-3p;hsa-miR-766-3p]
ACIN1	5	[hsa-miR-148b-5p;hsa-miR-18a-5p][hsa-miR-18a-5p;hsa-miR-3654][hsa-miR-224-5p;hsa-miR-320c][hsa-miR-224-5p;hsa-miR-320c;hsa-miR-376a-3p][hsa-miR-224-5p;hsa-miR-320c;hsa-miR-625-5p]
ACLY	4	[hsa-miR-1253;hsa-miR-374b-5p][hsa-miR-127-5p;hsa-miR-374c-5p][hsa-miR-214-3p;hsa-miR-369-3p;hsa-miR-374b-5p][hsa-miR-214-3p;hsa-miR-374b-5p]
ACMSD	1	[hsa-miR-32-3p;hsa-miR-651]
ACN9	2	[hsa-miR-129-5p;hsa-miR-3680-3p;hsa-miR-3934][hsa-miR-3680-3p;hsa-miR-3934]
ACO2	6	[hsa-miR-203;hsa-miR-3173-3p;hsa-miR-502-5p][hsa-miR-203;hsa-miR-34b-5p][hsa-miR-203;hsa-miR-34b-5p;hsa-miR-500a-5p][hsa-miR-203;hsa-miR-502-5p][hsa-miR-203;hsa-miR-940][hsa-miR-3157-5p;hsa-miR-34b-5p]
ACOT11	5	[hsa-miR-1271-5p;hsa-miR-196a-3p][hsa-miR-1271-5p;hsa-miR-196a-3p;hsa-miR-2355-3p][hsa-miR-1271-5p;hsa-miR-3176;hsa-miR-664-5p][hsa-miR-1271-5p;hsa-miR-664-5p][hsa-miR-135b-3p;hsa-miR-2355-3p;hsa-miR-581]
ACOT13	6	[hsa-miR-125b-5p;hsa-miR-153][hsa-miR-125b-5p;hsa-miR-153;hsa-miR-19b-1-5p][hsa-miR-125b-5p;hsa-miR-19b-1-5p][hsa-miR-125b-5p;hsa-miR-19b-1-5p;hsa-miR-512-3p][hsa-miR-1269a;hsa-miR-512-3p][hsa-miR-19b-1-5p;hsa-miR-337-5p]
ACOT7	6	[hsa-miR-1;hsa-miR-3654;hsa-miR-3926][hsa-miR-1;hsa-miR-3926][hsa-miR-21-3p;hsa-miR-625-5p][hsa-miR-3926;hsa-miR-625-5p][hsa-miR-3926;hsa-miR-9-3p][hsa-miR-497-5p;hsa-miR-625-5p]
ACOX1	5	[hsa-miR-130b-5p;hsa-miR-136-5p;hsa-miR-363-3p][hsa-miR-130b-5p;hsa-miR-363-3p][hsa-miR-136-5p;hsa-miR-146a-3p;hsa-miR-363-3p][hsa-miR-222-5p;hsa-miR-32-5p;hsa-miR-363-3p][hsa-miR-32-5p;hsa-miR-363-3p]
ACP1	5	[hsa-miR-1294;hsa-miR-19b-1-5p][hsa-miR-1294;hsa-miR-19b-1-5p;hsa-miR-431-5p][hsa-miR-19b-1-5p;hsa-miR-34b-5p;hsa-miR-500a-5p][hsa-miR-19b-1-5p;hsa-miR-500a-5p][hsa-miR-34b-5p;hsa-miR-934]
ACP2	6	[hsa-miR-105-5p;hsa-miR-130a-3p;hsa-miR-365a-5p][hsa-miR-105-5p;hsa-miR-15a-5p;hsa-miR-365a-5p][hsa-miR-105-5p;hsa-miR-195-3p;hsa-miR-365a-5p][hsa-miR-105-5p;hsa-miR-365a-5p][hsa-miR-15a-5p;hsa-miR-214-3p;hsa-miR-365a-5p][hsa-miR-214-3p;hsa-miR-365a-5p]
ACPL2	8	[hsa-miR-106a-5p;hsa-miR-29a-3p;hsa-miR-29b-3p][hsa-miR-106b-5p;hsa-miR-140-3p;hsa-miR-29b-3p][hsa-miR-140-3p;hsa-miR-29b-3p][hsa-miR-140-3p;hsa-miR-29b-3p;hsa-miR-548e][hsa-miR-218-1-3p;hsa-miR-29a-3p;hsa-miR-29b-3p][hsa-miR-29a-3p;hsa-miR-29b-3p][hsa-miR-29a-3p;hsa-miR-29b-3p;hsa-miR-373-3p][hsa-miR-29b-3p;hsa-miR-410;hsa-miR-520a-3p]
ACPP	2	[hsa-miR-10a-5p;hsa-miR-3652][hsa-miR-1229;hsa-miR-3605-5p]
ACRC	6	[hsa-miR-1976;hsa-miR-200b-3p;hsa-miR-374a-5p][hsa-miR-1976;hsa-miR-374a-5p][hsa-miR-1976;hsa-miR-374a-5p;hsa-miR-374b-5p][hsa-miR-2114-5p;hsa-miR-374a-5p;hsa-miR-429][hsa-miR-2114-5p;hsa-miR-374b-5p][hsa-miR-2114-5p;hsa-miR-374b-5p;hsa-miR-429]
ACSBG1	2	[hsa-miR-3661;hsa-miR-520a-5p][hsa-miR-520a-5p;hsa-miR-525-5p]
ACSL1	6	[hsa-miR-181a-5p;hsa-miR-224-3p;hsa-miR-30a-5p][hsa-miR-181d;hsa-miR-190b;hsa-miR-424-5p][hsa-miR-181d;hsa-miR-340-5p][hsa-miR-181d;hsa-miR-340-5p;hsa-miR-424-5p][hsa-miR-181d;hsa-miR-424-5p][hsa-miR-224-3p;hsa-miR-30a-5p]
ACSL3	7	[hsa-miR-1301;hsa-miR-188-5p;hsa-miR-200c-5p][hsa-miR-142-5p;hsa-miR-2115-5p][hsa-miR-188-5p;hsa-miR-203][hsa-miR-188-5p;hsa-miR-203;hsa-miR-26a-5p][hsa-miR-188-5p;hsa-miR-203;hsa-miR-642a-5p][hsa-miR-188-5p;hsa-miR-616-5p][hsa-miR-2115-5p;hsa-miR-935]
ACSL4	5	[hsa-miR-130a-3p;hsa-miR-195-5p;hsa-miR-934][hsa-miR-130a-3p;hsa-miR-934][hsa-miR-130b-3p;hsa-miR-424-5p;hsa-miR-584-5p][hsa-miR-142-3p;hsa-miR-584-5p][hsa-miR-424-5p;hsa-miR-584-5p]
ACSL5	8	[hsa-miR-135b-5p;hsa-miR-340-3p;hsa-miR-3654][hsa-miR-135b-5p;hsa-miR-3654][hsa-miR-195-5p;hsa-miR-2115-5p;hsa-miR-222-5p][hsa-miR-195-5p;hsa-miR-214-3p;hsa-miR-222-5p][hsa-miR-195-5p;hsa-miR-222-5p][hsa-miR-2115-5p;hsa-miR-214-3p;hsa-miR-222-5p][hsa-miR-2115-5p;hsa-miR-222-5p][hsa-miR-2115-5p;hsa-miR-222-5p;hsa-miR-340-3p]
ACSL6	9	[hsa-let-7f-5p;hsa-miR-140-5p;hsa-miR-526b-5p][hsa-miR-137;hsa-miR-140-5p][hsa-miR-137;hsa-miR-140-5p;hsa-miR-30d-3p][hsa-miR-140-5p;hsa-miR-195-3p;hsa-miR-526b-5p][hsa-miR-140-5p;hsa-miR-196a-5p][hsa-miR-140-5p;hsa-miR-196a-5p;hsa-miR-526b-5p][hsa-miR-140-5p;hsa-miR-196b-5p][hsa-miR-140-5p;hsa-miR-526b-5p][hsa-miR-140-5p;hsa-miR-526b-5p;hsa-miR-98]
ACSM2A	1	[hsa-miR-1237;hsa-miR-34c-5p]
ACSS2	2	[hsa-miR-1912;hsa-miR-3128;hsa-miR-513a-5p][hsa-miR-3128;hsa-miR-513a-5p]
ACSS3	1	[hsa-miR-29b-2-5p;hsa-miR-502-5p]
ACTA1	7	[hsa-let-7b-5p;hsa-miR-103a-2-5p;hsa-miR-544b][hsa-let-7c;hsa-miR-103a-2-5p;hsa-miR-544b][hsa-let-7f-5p;hsa-miR-103a-2-5p;hsa-miR-544b][hsa-miR-103a-2-5p;hsa-miR-3662;hsa-miR-544b][hsa-miR-103a-2-5p;hsa-miR-495;hsa-miR-544b][hsa-miR-103a-2-5p;hsa-miR-544b][hsa-miR-544b;hsa-miR-676-5p]
ACTA2	4	[hsa-miR-128;hsa-miR-181d][hsa-miR-128;hsa-miR-181d;hsa-miR-27b-3p][hsa-miR-181b-5p;hsa-miR-27b-3p;hsa-miR-582-5p][hsa-miR-27b-3p;hsa-miR-582-5p]
ACTB	6	[hsa-let-7a-2-3p;hsa-miR-130a-3p;hsa-miR-625-5p][hsa-miR-125a-3p;hsa-miR-625-5p][hsa-miR-130a-3p;hsa-miR-625-5p][hsa-miR-31-3p;hsa-miR-450b-5p][hsa-miR-3680-3p;hsa-miR-625-5p;hsa-miR-7-1-3p][hsa-miR-625-5p;hsa-miR-7-1-3p]
ACTBL2	1	[hsa-miR-188-3p;hsa-miR-628-3p]
ACTC1	6	[hsa-miR-30b-5p;hsa-miR-30c-5p;hsa-miR-30d-5p][hsa-miR-30b-5p;hsa-miR-30d-5p;hsa-miR-330-3p][hsa-miR-30b-5p;hsa-miR-30d-5p;hsa-miR-340-5p][hsa-miR-30b-5p;hsa-miR-30d-5p;hsa-miR-3678-3p][hsa-miR-30c-5p;hsa-miR-30d-5p][hsa-miR-30d-5p;hsa-miR-330-3p;hsa-miR-92a-3p]
ACTG1	6	[hsa-miR-190a;hsa-miR-454-3p][hsa-miR-190a;hsa-miR-454-3p;hsa-miR-512-3p][hsa-miR-190b;hsa-miR-301a-3p;hsa-miR-454-3p][hsa-miR-191-3p;hsa-miR-199a-5p;hsa-miR-3650][hsa-miR-199a-5p;hsa-miR-3650][hsa-miR-301a-3p;hsa-miR-454-3p]
ACTG2	3	[hsa-miR-135b-3p;hsa-miR-142-3p][hsa-miR-135b-3p;hsa-miR-142-3p;hsa-miR-33a-3p][hsa-miR-135b-3p;hsa-miR-33a-3p]
ACTL10	2	[hsa-miR-17-3p;hsa-miR-34c-5p][hsa-miR-34c-5p;hsa-miR-92a-1-5p]
ACTL6A	6	[hsa-let-7a-3p;hsa-miR-181a-2-3p;hsa-miR-520c-3p][hsa-miR-1283;hsa-miR-320c][hsa-miR-1283;hsa-miR-320c;hsa-miR-496][hsa-miR-1283;hsa-miR-3662;hsa-miR-940][hsa-miR-1283;hsa-miR-98][hsa-miR-181a-2-3p;hsa-miR-520c-3p]
ACTL6B	1	[hsa-miR-494;hsa-miR-499a-3p]
ACTL8	2	[hsa-miR-2115-5p;hsa-miR-577][hsa-miR-3913-5p;hsa-miR-577]
ACTN1	7	[hsa-miR-22-3p;hsa-miR-877-3p][hsa-miR-224-5p;hsa-miR-521][hsa-miR-3065-5p;hsa-miR-337-3p][hsa-miR-3120-3p;hsa-miR-487a;hsa-miR-521][hsa-miR-3120-3p;hsa-miR-521][hsa-miR-521;hsa-miR-590-3p][hsa-miR-521;hsa-miR-877-3p]
ACTN2	7	[hsa-miR-1237;hsa-miR-25-3p;hsa-miR-9-5p][hsa-miR-1237;hsa-miR-9-5p][hsa-miR-130a-5p;hsa-miR-520h;hsa-miR-9-5p][hsa-miR-25-3p;hsa-miR-9-5p][hsa-miR-25-3p;hsa-miR-9-5p;hsa-miR-92a-3p][hsa-miR-520h;hsa-miR-9-5p][hsa-miR-9-5p;hsa-miR-92a-3p]
ACTN4	6	[hsa-miR-129-5p;hsa-miR-16-1-3p;hsa-miR-3680-3p][hsa-miR-129-5p;hsa-miR-3680-3p][hsa-miR-148a-3p;hsa-miR-9-5p][hsa-miR-2278;hsa-miR-548a-5p][hsa-miR-3680-3p;hsa-miR-369-3p][hsa-miR-410;hsa-miR-9-5p]
ACTR1A	5	[hsa-miR-1285-3p;hsa-miR-375][hsa-miR-16-5p;hsa-miR-30b-5p;hsa-miR-424-5p][hsa-miR-16-5p;hsa-miR-424-5p][hsa-miR-195-5p;hsa-miR-30b-5p][hsa-miR-205-3p;hsa-miR-9-5p]
ACTR1B	4	[hsa-miR-556-3p;hsa-miR-656][hsa-miR-584-5p;hsa-miR-625-3p;hsa-miR-944][hsa-miR-584-5p;hsa-miR-944][hsa-miR-625-3p;hsa-miR-656;hsa-miR-944]
ACTR2	7	[hsa-let-7g-5p;hsa-miR-195-5p;hsa-miR-495][hsa-let-7i-5p;hsa-miR-195-5p][hsa-miR-181a-2-3p;hsa-miR-183-3p;hsa-miR-195-5p][hsa-miR-181a-2-3p;hsa-miR-195-5p][hsa-miR-182-5p;hsa-miR-195-5p;hsa-miR-495][hsa-miR-195-5p;hsa-miR-495][hsa-miR-2355-5p;hsa-miR-3690]
ACTR3	4	[hsa-miR-101-3p;hsa-miR-323a-3p][hsa-miR-101-3p;hsa-miR-34b-3p][hsa-miR-101-3p;hsa-miR-34b-3p;hsa-miR-492][hsa-miR-101-5p;hsa-miR-642a-5p]
ACTR3B	8	[hsa-miR-135a-5p;hsa-miR-19b-3p][hsa-miR-135a-5p;hsa-miR-19b-3p;hsa-miR-3613-5p][hsa-miR-135b-5p;hsa-miR-19b-3p][hsa-miR-135b-5p;hsa-miR-19b-3p;hsa-miR-3613-5p][hsa-miR-135b-5p;hsa-miR-19b-3p;hsa-miR-497-5p][hsa-miR-15a-5p;hsa-miR-15b-5p][hsa-miR-15a-5p;hsa-miR-15b-5p;hsa-miR-16-5p][hsa-miR-19b-3p;hsa-miR-503]
ACTR8	3	[hsa-miR-34c-5p;hsa-miR-449a][hsa-miR-34c-5p;hsa-miR-449b-5p][hsa-miR-449a;hsa-miR-769-5p]
ACTRT3	2	[hsa-miR-1236;hsa-miR-1248][hsa-miR-1236;hsa-miR-146b-3p]
ACVR1	5	[hsa-miR-130a-3p;hsa-miR-181a-2-3p;hsa-miR-30b-5p][hsa-miR-140-5p;hsa-miR-337-3p][hsa-miR-181a-2-3p;hsa-miR-30b-5p][hsa-miR-18a-5p;hsa-miR-30a-5p][hsa-miR-337-3p;hsa-miR-381;hsa-miR-582-5p]
ACVR1B	5	[hsa-let-7f-5p;hsa-miR-153][hsa-let-7f-5p;hsa-miR-153;hsa-miR-3609][hsa-miR-106b-5p;hsa-miR-155-5p][hsa-miR-106b-5p;hsa-miR-3136-5p][hsa-miR-135b-5p;hsa-miR-153;hsa-miR-24-3p]
ACVR1C	6	[hsa-let-7c;hsa-miR-135b-5p;hsa-miR-335-3p][hsa-let-7c;hsa-miR-335-3p][hsa-miR-135b-5p;hsa-miR-340-5p][hsa-miR-135b-5p;hsa-miR-340-5p;hsa-miR-497-3p][hsa-miR-135b-5p;hsa-miR-381;hsa-miR-514a-3p][hsa-miR-135b-5p;hsa-miR-381;hsa-miR-605]
ACVR2A	5	[hsa-miR-125b-2-3p;hsa-miR-130b-3p][hsa-miR-125b-2-3p;hsa-miR-130b-3p;hsa-miR-588][hsa-miR-1301;hsa-miR-130a-3p;hsa-miR-16-5p][hsa-miR-130a-3p;hsa-miR-16-5p][hsa-miR-16-5p;hsa-miR-337-3p]
ACVR2B	6	[hsa-miR-181a-2-3p;hsa-miR-301a-3p;hsa-miR-3942-5p][hsa-miR-22-5p;hsa-miR-592][hsa-miR-22-5p;hsa-miR-592;hsa-miR-7-1-3p][hsa-miR-26a-2-3p;hsa-miR-29b-1-5p;hsa-miR-301a-3p][hsa-miR-26a-2-3p;hsa-miR-301a-3p][hsa-miR-301a-3p;hsa-miR-548o-3p]
ACYP1	8	[hsa-miR-106a-3p;hsa-miR-573;hsa-miR-92a-3p][hsa-miR-106a-3p;hsa-miR-92a-3p][hsa-miR-1915-5p;hsa-miR-432-5p;hsa-miR-92a-3p][hsa-miR-1915-5p;hsa-miR-92a-3p][hsa-miR-31-3p;hsa-miR-378a-3p][hsa-miR-31-3p;hsa-miR-378a-3p;hsa-miR-505-5p][hsa-miR-31-3p;hsa-miR-432-5p][hsa-miR-31-3p;hsa-miR-92b-3p]
ADAD1	2	[hsa-miR-329;hsa-miR-362-3p;hsa-miR-548o-3p][hsa-miR-362-3p;hsa-miR-548o-3p]
ADAL	3	[hsa-miR-1224-3p;hsa-miR-1269a][hsa-miR-1224-3p;hsa-miR-1269a;hsa-miR-31-3p][hsa-miR-1269a;hsa-miR-31-3p]
ADAM10	3	[hsa-miR-195-5p;hsa-miR-3605-5p][hsa-miR-26b-3p;hsa-miR-409-3p][hsa-miR-33a-5p;hsa-miR-369-3p;hsa-miR-409-3p]
ADAM11	7	[hsa-miR-125b-5p;hsa-miR-181c-5p;hsa-miR-181d][hsa-miR-181c-5p;hsa-miR-181d][hsa-miR-181c-5p;hsa-miR-34a-3p;hsa-miR-9-5p][hsa-miR-181d;hsa-miR-22-3p;hsa-miR-9-5p][hsa-miR-181d;hsa-miR-3607-3p;hsa-miR-9-5p][hsa-miR-181d;hsa-miR-9-5p][hsa-miR-34a-3p;hsa-miR-9-5p]
ADAM12	7	[hsa-miR-130a-3p;hsa-miR-19b-3p][hsa-miR-130a-3p;hsa-miR-19b-3p;hsa-miR-29c-3p][hsa-miR-19b-3p;hsa-miR-29c-3p][hsa-miR-19b-3p;hsa-miR-29c-3p;hsa-miR-411-5p][hsa-miR-19b-3p;hsa-miR-29c-3p;hsa-miR-454-3p][hsa-miR-19b-3p;hsa-miR-29c-3p;hsa-miR-501-3p][hsa-miR-19b-3p;hsa-miR-32-3p]
ADAM15	6	[hsa-let-7b-5p;hsa-let-7e-5p][hsa-let-7b-5p;hsa-let-7e-5p;hsa-let-7f-5p][hsa-let-7d-5p;hsa-let-7e-5p;hsa-let-7f-5p][hsa-let-7e-5p;hsa-let-7f-5p][hsa-let-7g-5p;hsa-miR-3927][hsa-let-7g-5p;hsa-miR-3927;hsa-miR-98]
ADAM17	6	[hsa-miR-1180;hsa-miR-140-3p;hsa-miR-452-5p][hsa-miR-1180;hsa-miR-452-5p][hsa-miR-1180;hsa-miR-452-5p;hsa-miR-512-3p][hsa-miR-135b-3p;hsa-miR-140-3p;hsa-miR-500a-3p][hsa-miR-148a-3p;hsa-miR-616-5p][hsa-miR-224-5p;hsa-miR-452-5p]
ADAM19	4	[hsa-miR-130a-5p;hsa-miR-23a-3p][hsa-miR-155-5p;hsa-miR-23a-3p][hsa-miR-155-5p;hsa-miR-26b-5p;hsa-miR-30e-5p][hsa-miR-155-5p;hsa-miR-30e-5p]
ADAM22	8	[hsa-miR-148a-5p;hsa-miR-3139][hsa-miR-148a-5p;hsa-miR-514a-3p][hsa-miR-148b-5p;hsa-miR-222-3p;hsa-miR-330-3p][hsa-miR-222-3p;hsa-miR-3148][hsa-miR-222-3p;hsa-miR-330-3p][hsa-miR-222-3p;hsa-miR-383][hsa-miR-222-3p;hsa-miR-383;hsa-miR-582-5p][hsa-miR-222-3p;hsa-miR-383;hsa-miR-632]
ADAM23	5	[hsa-miR-103a-2-5p;hsa-miR-205-5p;hsa-miR-32-5p][hsa-miR-145-3p;hsa-miR-33a-5p][hsa-miR-205-5p;hsa-miR-223-5p][hsa-miR-25-3p;hsa-miR-33a-5p][hsa-miR-32-5p;hsa-miR-337-3p]
ADAM28	1	[hsa-miR-1248;hsa-miR-491-3p]
ADAM29	1	[hsa-miR-3140-3p;hsa-miR-377-5p]
ADAM9	8	[hsa-miR-106b-5p;hsa-miR-338-3p][hsa-miR-125a-5p;hsa-miR-342-3p;hsa-miR-570-3p][hsa-miR-125b-5p;hsa-miR-338-3p][hsa-miR-30a-5p;hsa-miR-570-3p][hsa-miR-30a-5p;hsa-miR-570-3p;hsa-miR-580][hsa-miR-338-3p;hsa-miR-93-5p][hsa-miR-342-3p;hsa-miR-550a-5p;hsa-miR-570-3p][hsa-miR-342-3p;hsa-miR-570-3p]
ADAMDEC1	5	[hsa-miR-1269a;hsa-miR-221-5p;hsa-miR-378a-3p][hsa-miR-221-5p;hsa-miR-3690;hsa-miR-378a-3p][hsa-miR-221-5p;hsa-miR-378a-3p][hsa-miR-3690;hsa-miR-378a-3p][hsa-miR-3690;hsa-miR-517b-3p]
ADAMTS1	7	[hsa-miR-1226-3p;hsa-miR-1277-3p][hsa-miR-1226-3p;hsa-miR-1277-3p;hsa-miR-335-3p][hsa-miR-1226-3p;hsa-miR-1277-3p;hsa-miR-340-5p][hsa-miR-1226-3p;hsa-miR-1277-3p;hsa-miR-548y][hsa-miR-1226-3p;hsa-miR-625-3p][hsa-miR-1;hsa-miR-1226-3p][hsa-miR-1;hsa-miR-1226-3p;hsa-miR-196b-5p]
ADAMTS10	8	[hsa-miR-101-3p;hsa-miR-186-5p][hsa-miR-101-3p;hsa-miR-186-5p;hsa-miR-29c-3p][hsa-miR-101-3p;hsa-miR-378b][hsa-miR-186-5p;hsa-miR-27a-3p][hsa-miR-186-5p;hsa-miR-27b-3p][hsa-miR-27a-3p;hsa-miR-378b][hsa-miR-29c-3p;hsa-miR-378b][hsa-miR-29c-3p;hsa-miR-378b;hsa-miR-508-3p]
ADAMTS14	1	[hsa-miR-3646;hsa-miR-3662]
ADAMTS15	6	[hsa-let-7a-5p;hsa-let-7g-5p;hsa-miR-148b-3p][hsa-let-7a-5p;hsa-miR-148a-3p;hsa-miR-148b-3p][hsa-let-7a-5p;hsa-miR-148b-3p][hsa-let-7b-5p;hsa-let-7d-5p;hsa-miR-152][hsa-let-7d-5p;hsa-let-7f-5p;hsa-miR-152][hsa-let-7d-5p;hsa-miR-152]
ADAMTS16	3	[hsa-miR-340-5p;hsa-miR-548a-3p;hsa-miR-548e][hsa-miR-340-5p;hsa-miR-548e][hsa-miR-548a-3p;hsa-miR-548e]
ADAMTS17	5	[hsa-miR-101-3p;hsa-miR-136-3p][hsa-miR-101-3p;hsa-miR-20a-5p][hsa-miR-101-3p;hsa-miR-24-1-5p;hsa-miR-3126-5p][hsa-miR-136-3p;hsa-miR-29c-3p][hsa-miR-2115-5p;hsa-miR-487b]
ADAMTS18	6	[hsa-miR-1224-5p;hsa-miR-148a-3p;hsa-miR-664-5p][hsa-miR-130a-3p;hsa-miR-137;hsa-miR-148a-3p][hsa-miR-130a-3p;hsa-miR-16-5p][hsa-miR-137;hsa-miR-16-5p][hsa-miR-148a-3p;hsa-miR-664-5p][hsa-miR-3919;hsa-miR-411-3p]
ADAMTS19	7	[hsa-miR-103a-3p;hsa-miR-551b-5p;hsa-miR-887][hsa-miR-15b-3p;hsa-miR-551b-5p;hsa-miR-582-5p][hsa-miR-214-3p;hsa-miR-551b-5p;hsa-miR-887][hsa-miR-301a-3p;hsa-miR-3074-3p;hsa-miR-551b-5p][hsa-miR-301a-3p;hsa-miR-551b-5p][hsa-miR-374a-5p;hsa-miR-551b-5p;hsa-miR-887][hsa-miR-551b-5p;hsa-miR-581;hsa-miR-582-5p]
ADAMTS2	1	[hsa-miR-29a-3p;hsa-miR-29b-3p;hsa-miR-767-5p]
ADAMTS3	8	[hsa-let-7f-2-3p;hsa-miR-190b][hsa-let-7f-2-3p;hsa-miR-190b;hsa-miR-32-5p][hsa-let-7f-2-3p;hsa-miR-190b;hsa-miR-3921][hsa-miR-1263;hsa-miR-190b][hsa-miR-130a-3p;hsa-miR-16-1-3p;hsa-miR-190b][hsa-miR-16-1-3p;hsa-miR-190b][hsa-miR-16-1-3p;hsa-miR-190b;hsa-miR-25-3p][hsa-miR-16-1-3p;hsa-miR-190b;hsa-miR-92b-3p]
ADAMTS4	4	[hsa-miR-125a-5p;hsa-miR-148b-5p;hsa-miR-3609][hsa-miR-125a-5p;hsa-miR-148b-5p;hsa-miR-548q][hsa-miR-125a-5p;hsa-miR-3168;hsa-miR-548t-5p][hsa-miR-125b-5p;hsa-miR-3659]
ADAMTS5	7	[hsa-let-7c;hsa-miR-452-5p][hsa-let-7c;hsa-miR-93-5p][hsa-miR-106b-5p;hsa-miR-16-5p;hsa-miR-197-3p][hsa-miR-106b-5p;hsa-miR-197-3p][hsa-miR-148a-5p;hsa-miR-2278;hsa-miR-29c-3p][hsa-miR-2278;hsa-miR-29c-3p][hsa-miR-2278;hsa-miR-29c-3p;hsa-miR-520d-5p]
ADAMTS6	9	[hsa-miR-1248;hsa-miR-16-5p;hsa-miR-30e-5p][hsa-miR-130a-5p;hsa-miR-16-5p;hsa-miR-30e-5p][hsa-miR-136-5p;hsa-miR-16-5p][hsa-miR-16-5p;hsa-miR-24-2-5p;hsa-miR-30e-5p][hsa-miR-16-5p;hsa-miR-30e-5p][hsa-miR-16-5p;hsa-miR-30e-5p;hsa-miR-31-5p][hsa-miR-16-5p;hsa-miR-30e-5p;hsa-miR-505-3p][hsa-miR-16-5p;hsa-miR-30e-5p;hsa-miR-548k][hsa-miR-16-5p;hsa-miR-339-5p]
ADAMTS7	4	[hsa-miR-2355-5p;hsa-miR-29b-3p;hsa-miR-548b-3p][hsa-miR-2355-5p;hsa-miR-29c-3p;hsa-miR-548b-3p][hsa-miR-2355-5p;hsa-miR-548b-3p][hsa-miR-2355-5p;hsa-miR-767-5p]
ADAMTS8	6	[hsa-let-7a-5p;hsa-let-7e-5p][hsa-let-7b-5p;hsa-miR-153;hsa-miR-23b-3p][hsa-let-7b-5p;hsa-miR-196a-5p;hsa-miR-23b-3p][hsa-let-7b-5p;hsa-miR-23b-3p][hsa-let-7b-5p;hsa-miR-23b-3p;hsa-miR-521][hsa-miR-143-5p;hsa-miR-487a]
ADAMTS9	7	[hsa-let-7c;hsa-miR-135b-3p;hsa-miR-98][hsa-let-7c;hsa-miR-29c-3p;hsa-miR-98][hsa-let-7c;hsa-miR-651][hsa-let-7c;hsa-miR-98][hsa-miR-18a-5p;hsa-miR-223-3p][hsa-miR-18a-5p;hsa-miR-223-3p;hsa-miR-330-3p][hsa-miR-223-3p;hsa-miR-33b-5p;hsa-miR-519a-5p]
ADAMTSL1	6	[hsa-let-7a-2-3p;hsa-miR-374a-5p;hsa-miR-493-5p][hsa-let-7a-2-3p;hsa-miR-493-5p][hsa-let-7a-2-3p;hsa-miR-495][hsa-miR-106a-5p;hsa-miR-181a-5p;hsa-miR-93-3p][hsa-miR-106a-5p;hsa-miR-93-3p][hsa-miR-126-5p;hsa-miR-493-5p]
ADAMTSL3	7	[hsa-miR-15a-5p;hsa-miR-27a-3p;hsa-miR-32-5p][hsa-miR-183-3p;hsa-miR-19a-3p;hsa-miR-27b-3p][hsa-miR-183-3p;hsa-miR-27b-3p][hsa-miR-183-3p;hsa-miR-27b-3p;hsa-miR-500a-3p][hsa-miR-27a-3p;hsa-miR-27b-3p][hsa-miR-27a-3p;hsa-miR-32-5p][hsa-miR-27b-3p;hsa-miR-92a-3p]
ADAMTSL4	1	[hsa-miR-148b-5p;hsa-miR-224-5p]
ADAR	6	[hsa-miR-135a-5p;hsa-miR-135b-5p;hsa-miR-362-3p][hsa-miR-135b-5p;hsa-miR-362-3p;hsa-miR-425-5p][hsa-miR-186-3p;hsa-miR-3607-5p][hsa-miR-3607-5p;hsa-miR-362-3p][hsa-miR-3607-5p;hsa-miR-425-5p][hsa-miR-362-3p;hsa-miR-425-5p]
ADARB1	4	[hsa-miR-181a-5p;hsa-miR-199a-3p;hsa-miR-199b-3p][hsa-miR-181a-5p;hsa-miR-199b-3p][hsa-miR-181c-5p;hsa-miR-181d][hsa-miR-181c-5p;hsa-miR-181d;hsa-miR-340-5p]
ADARB2	1	[hsa-miR-135a-5p;hsa-miR-135b-5p]
ADAT2	5	[hsa-miR-106a-5p;hsa-miR-17-5p;hsa-miR-197-3p][hsa-miR-106a-5p;hsa-miR-20b-5p][hsa-miR-17-5p;hsa-miR-197-3p][hsa-miR-20b-5p;hsa-miR-411-3p][hsa-miR-3065-5p;hsa-miR-588]
ADC	6	[hsa-miR-141-3p;hsa-miR-183-3p][hsa-miR-141-3p;hsa-miR-409-3p][hsa-miR-188-5p;hsa-miR-19b-1-5p][hsa-miR-188-5p;hsa-miR-4280][hsa-miR-200a-3p;hsa-miR-378a-3p;hsa-miR-3926][hsa-miR-378a-3p;hsa-miR-3926]
ADCK3	1	[hsa-miR-3151;hsa-miR-507]
ADCY1	6	[hsa-miR-1289;hsa-miR-135a-5p;hsa-miR-582-5p][hsa-miR-1289;hsa-miR-454-3p][hsa-miR-135a-5p;hsa-miR-454-3p;hsa-miR-582-5p][hsa-miR-135a-5p;hsa-miR-582-5p][hsa-miR-26b-5p;hsa-miR-3117-3p;hsa-miR-582-5p][hsa-miR-26b-5p;hsa-miR-582-5p]
ADCY2	6	[hsa-miR-137;hsa-miR-3653;hsa-miR-548o-3p][hsa-miR-148b-3p;hsa-miR-3653;hsa-miR-548o-3p][hsa-miR-3653;hsa-miR-548o-3p][hsa-miR-3653;hsa-miR-548o-3p;hsa-miR-582-3p][hsa-miR-548f;hsa-miR-548o-3p;hsa-miR-582-3p][hsa-miR-548o-3p;hsa-miR-582-3p]
ADCY3	7	[hsa-miR-132-3p;hsa-miR-577][hsa-miR-214-3p;hsa-miR-3186-5p;hsa-miR-577][hsa-miR-3137;hsa-miR-335-5p;hsa-miR-577][hsa-miR-3177-3p;hsa-miR-320b][hsa-miR-335-5p;hsa-miR-577][hsa-miR-488-3p;hsa-miR-548b-3p;hsa-miR-577][hsa-miR-548b-3p;hsa-miR-577]
ADCY5	1	[hsa-miR-1254;hsa-miR-221-5p]
ADCY6	6	[hsa-miR-204-5p;hsa-miR-24-3p][hsa-miR-24-3p;hsa-miR-96-5p][hsa-miR-323a-3p;hsa-miR-365a-3p;hsa-miR-9-5p][hsa-miR-365a-3p;hsa-miR-3688-3p][hsa-miR-365a-3p;hsa-miR-543;hsa-miR-9-5p][hsa-miR-365a-3p;hsa-miR-875-3p]
ADCY8	1	[hsa-miR-3613-3p;hsa-miR-410]
ADCY9	6	[hsa-miR-103a-2-5p;hsa-miR-374b-5p][hsa-miR-181a-5p;hsa-miR-18a-5p;hsa-miR-506-3p][hsa-miR-18a-5p;hsa-miR-374a-5p][hsa-miR-18a-5p;hsa-miR-506-3p][hsa-miR-18a-5p;hsa-miR-506-3p;hsa-miR-892a][hsa-miR-18a-5p;hsa-miR-892a]
ADCYAP1	6	[hsa-miR-124-3p;hsa-miR-1262][hsa-miR-124-3p;hsa-miR-129-2-3p;hsa-miR-217][hsa-miR-124-3p;hsa-miR-129-2-3p;hsa-miR-708-3p][hsa-miR-124-3p;hsa-miR-144-5p][hsa-miR-124-3p;hsa-miR-1912;hsa-miR-550a-5p][hsa-miR-124-3p;hsa-miR-3929]
ADD1	3	[hsa-miR-130b-3p;hsa-miR-493-3p][hsa-miR-186-5p;hsa-miR-33b-5p;hsa-miR-519a-5p][hsa-miR-33b-5p;hsa-miR-519a-5p]
ADD2	6	[hsa-miR-129-5p;hsa-miR-3126-3p][hsa-miR-29a-5p;hsa-miR-30e-3p;hsa-miR-676-3p][hsa-miR-30e-3p;hsa-miR-484][hsa-miR-30e-3p;hsa-miR-676-3p][hsa-miR-30e-3p;hsa-miR-760][hsa-miR-378b;hsa-miR-3922-3p;hsa-miR-873-5p]
ADD3	6	[hsa-let-7b-5p;hsa-miR-130b-3p][hsa-miR-200a-3p;hsa-miR-365a-3p][hsa-miR-200a-3p;hsa-miR-365a-3p;hsa-miR-499a-3p][hsa-miR-200a-3p;hsa-miR-365a-3p;hsa-miR-518f-5p][hsa-miR-200a-3p;hsa-miR-484][hsa-miR-200a-3p;hsa-miR-539-5p]
ADGB	6	[hsa-miR-34b-5p;hsa-miR-449c-5p][hsa-miR-34b-5p;hsa-miR-449c-5p;hsa-miR-539-5p][hsa-miR-34b-5p;hsa-miR-449c-5p;hsa-miR-579][hsa-miR-34b-5p;hsa-miR-449c-5p;hsa-miR-766-3p][hsa-miR-449c-5p;hsa-miR-539-5p][hsa-miR-449c-5p;hsa-miR-579]
ADH1B	1	[hsa-miR-146a-3p;hsa-miR-548v]
ADH4	3	[hsa-miR-130a-5p;hsa-miR-376c;hsa-miR-940][hsa-miR-130a-5p;hsa-miR-940][hsa-miR-548t-5p;hsa-miR-940]
ADH6	1	[hsa-miR-105-5p;hsa-miR-203;hsa-miR-488-5p]
ADI1	1	[hsa-miR-34b-5p;hsa-miR-3913-5p]
ADIPOR1	8	[hsa-miR-1269a;hsa-miR-221-3p][hsa-miR-1269a;hsa-miR-221-3p;hsa-miR-3942-5p][hsa-miR-1269a;hsa-miR-221-3p;hsa-miR-455-3p][hsa-miR-1269a;hsa-miR-221-3p;hsa-miR-574-5p][hsa-miR-1269a;hsa-miR-221-3p;hsa-miR-9-3p][hsa-miR-26a-5p;hsa-miR-3664-5p;hsa-miR-378a-3p][hsa-miR-26a-5p;hsa-miR-378a-3p][hsa-miR-378a-3p;hsa-miR-9-3p]
ADIPOR2	9	[hsa-let-7a-3p;hsa-let-7f-5p;hsa-miR-452-5p][hsa-let-7c;hsa-let-7d-5p;hsa-miR-452-5p][hsa-let-7c;hsa-miR-452-5p][hsa-let-7c;hsa-miR-452-5p;hsa-miR-942][hsa-let-7e-5p;hsa-miR-452-5p][hsa-let-7f-5p;hsa-miR-452-5p][hsa-let-7f-5p;hsa-miR-452-5p;hsa-miR-520d-3p][hsa-let-7f-5p;hsa-miR-452-5p;hsa-miR-629-3p][hsa-miR-429;hsa-miR-452-5p]
ADK	3	[hsa-miR-1256;hsa-miR-3662][hsa-miR-1271-5p;hsa-miR-548y;hsa-miR-944][hsa-miR-577;hsa-miR-96-5p]
ADM	6	[hsa-miR-1248;hsa-miR-20b-5p;hsa-miR-24-3p][hsa-miR-148a-5p;hsa-miR-20b-5p;hsa-miR-24-3p][hsa-miR-148a-5p;hsa-miR-26b-5p][hsa-miR-20b-5p;hsa-miR-24-3p][hsa-miR-2277-3p;hsa-miR-24-3p][hsa-miR-24-3p;hsa-miR-26a-5p]
ADNP	7	[hsa-miR-107;hsa-miR-1267;hsa-miR-27b-5p][hsa-miR-1267;hsa-miR-27b-5p][hsa-miR-151a-3p;hsa-miR-27a-3p;hsa-miR-328][hsa-miR-200c-5p;hsa-miR-221-3p][hsa-miR-200c-5p;hsa-miR-221-3p;hsa-miR-3652][hsa-miR-200c-5p;hsa-miR-221-3p;hsa-miR-449b-5p][hsa-miR-27a-3p;hsa-miR-328]
ADNP2	6	[hsa-miR-128;hsa-miR-3065-3p;hsa-miR-570-3p][hsa-miR-3065-3p;hsa-miR-424-5p;hsa-miR-570-3p][hsa-miR-3065-3p;hsa-miR-570-3p][hsa-miR-514a-3p;hsa-miR-517b-3p][hsa-miR-514a-3p;hsa-miR-517b-3p;hsa-miR-570-3p][hsa-miR-514a-3p;hsa-miR-570-3p]
ADO	7	[hsa-miR-1285-3p;hsa-miR-25-3p;hsa-miR-3168][hsa-miR-1285-3p;hsa-miR-3168][hsa-miR-25-3p;hsa-miR-30e-5p;hsa-miR-3168][hsa-miR-25-3p;hsa-miR-3168][hsa-miR-30c-5p;hsa-miR-363-3p;hsa-miR-488-3p][hsa-miR-3168;hsa-miR-33a-5p][hsa-miR-33a-5p;hsa-miR-488-3p]
ADORA2B	6	[hsa-miR-196a-3p;hsa-miR-24-1-5p;hsa-miR-27a-3p][hsa-miR-196a-3p;hsa-miR-27a-3p][hsa-miR-196a-3p;hsa-miR-27a-3p;hsa-miR-452-5p][hsa-miR-196a-3p;hsa-miR-452-5p][hsa-miR-24-2-5p;hsa-miR-452-5p][hsa-miR-27b-3p;hsa-miR-452-5p]
ADPGK	4	[hsa-miR-145-5p;hsa-miR-203;hsa-miR-3682-3p][hsa-miR-145-5p;hsa-miR-203;hsa-miR-9-5p][hsa-miR-145-5p;hsa-miR-3682-3p][hsa-miR-145-5p;hsa-miR-3682-3p;hsa-miR-9-5p]
ADRA1A	8	[hsa-miR-1234;hsa-miR-378a-5p;hsa-miR-664-3p][hsa-miR-130b-5p;hsa-miR-148b-5p;hsa-miR-378a-5p][hsa-miR-148b-5p;hsa-miR-378a-5p][hsa-miR-148b-5p;hsa-miR-378a-5p;hsa-miR-433][hsa-miR-149-5p;hsa-miR-378a-5p;hsa-miR-664-3p][hsa-miR-2114-3p;hsa-miR-378a-5p][hsa-miR-29a-5p;hsa-miR-378a-5p;hsa-miR-433][hsa-miR-378a-5p;hsa-miR-433]
ADRA1B	8	[hsa-let-7b-5p;hsa-let-7d-5p][hsa-let-7b-5p;hsa-miR-106a-5p][hsa-let-7b-5p;hsa-miR-106a-5p;hsa-miR-20b-5p][hsa-let-7b-5p;hsa-miR-106a-5p;hsa-miR-224-5p][hsa-let-7b-5p;hsa-miR-106a-5p;hsa-miR-539-5p][hsa-let-7g-5p;hsa-miR-106a-5p][hsa-let-7g-5p;hsa-miR-20b-5p][hsa-let-7g-5p;hsa-miR-484]
ADRA1D	6	[hsa-let-7g-3p;hsa-miR-182-5p;hsa-miR-515-5p][hsa-miR-182-5p;hsa-miR-30c-5p;hsa-miR-515-5p][hsa-miR-182-5p;hsa-miR-30d-5p;hsa-miR-515-5p][hsa-miR-190b;hsa-miR-34a-5p][hsa-miR-190b;hsa-miR-34a-5p;hsa-miR-592][hsa-miR-26a-2-3p;hsa-miR-34a-5p]
ADRA2A	6	[hsa-let-7g-3p;hsa-miR-194-5p;hsa-miR-29b-2-5p][hsa-miR-135b-5p;hsa-miR-30d-5p][hsa-miR-194-5p;hsa-miR-29b-2-5p][hsa-miR-194-5p;hsa-miR-29b-2-5p;hsa-miR-654-3p][hsa-miR-194-5p;hsa-miR-676-5p][hsa-miR-30a-5p;hsa-miR-3200-3p]
ADRA2B	4	[hsa-miR-142-5p;hsa-miR-449a][hsa-miR-30e-5p;hsa-miR-449a][hsa-miR-30e-5p;hsa-miR-449a;hsa-miR-452-3p][hsa-miR-30e-5p;hsa-miR-449a;hsa-miR-520d-5p]
ADRA2C	6	[hsa-miR-182-5p;hsa-miR-202-3p;hsa-miR-524-5p][hsa-miR-202-3p;hsa-miR-30e-3p;hsa-miR-524-5p][hsa-miR-202-3p;hsa-miR-524-5p][hsa-miR-222-5p;hsa-miR-335-3p][hsa-miR-30d-3p;hsa-miR-524-5p][hsa-miR-335-3p;hsa-miR-524-5p]
ADRB1	7	[hsa-let-7b-5p;hsa-miR-30b-5p;hsa-miR-363-3p][hsa-miR-218-5p;hsa-miR-30b-5p;hsa-miR-342-3p][hsa-miR-30b-5p;hsa-miR-3125;hsa-miR-342-3p][hsa-miR-30b-5p;hsa-miR-342-3p][hsa-miR-30b-5p;hsa-miR-363-3p][hsa-miR-30b-5p;hsa-miR-520a-3p][hsa-miR-466;hsa-miR-944]
ADRB2	7	[hsa-let-7c;hsa-let-7g-5p;hsa-miR-3607-3p][hsa-let-7c;hsa-miR-30a-5p;hsa-miR-429][hsa-let-7c;hsa-miR-381;hsa-miR-495][hsa-let-7c;hsa-miR-425-3p;hsa-miR-495][hsa-let-7c;hsa-miR-429][hsa-let-7c;hsa-miR-493-3p][hsa-let-7c;hsa-miR-495]
ADRB3	4	[hsa-let-7e-5p;hsa-let-7f-5p;hsa-let-7g-5p][hsa-let-7f-5p;hsa-let-7g-5p][hsa-let-7f-5p;hsa-let-7g-5p;hsa-miR-3170][hsa-let-7f-5p;hsa-let-7g-5p;hsa-miR-98]
ADRBK1	6	[hsa-miR-10a-3p;hsa-miR-181d;hsa-miR-214-3p][hsa-miR-125b-5p;hsa-miR-181d;hsa-miR-214-3p][hsa-miR-181a-5p;hsa-miR-181d;hsa-miR-214-3p][hsa-miR-181d;hsa-miR-214-3p;hsa-miR-29a-3p][hsa-miR-181d;hsa-miR-214-3p;hsa-miR-570-3p][hsa-miR-181d;hsa-miR-214-3p;hsa-miR-7-1-3p]
ADRBK2	5	[hsa-miR-122-5p;hsa-miR-199a-3p;hsa-miR-376c][hsa-miR-122-5p;hsa-miR-199b-3p;hsa-miR-218-5p][hsa-miR-122-5p;hsa-miR-218-5p][hsa-miR-122-5p;hsa-miR-218-5p;hsa-miR-376c][hsa-miR-218-5p;hsa-miR-98]
ADSS	8	[hsa-miR-15b-5p;hsa-miR-16-5p;hsa-miR-3646][hsa-miR-16-5p;hsa-miR-214-3p][hsa-miR-16-5p;hsa-miR-214-3p;hsa-miR-2278][hsa-miR-16-5p;hsa-miR-214-3p;hsa-miR-29b-2-5p][hsa-miR-16-5p;hsa-miR-214-3p;hsa-miR-520d-5p][hsa-miR-16-5p;hsa-miR-217][hsa-miR-16-5p;hsa-miR-3619-5p][hsa-miR-16-5p;hsa-miR-3646;hsa-miR-656]
ADTRP	1	[hsa-miR-4326;hsa-miR-581]
AEBP2	7	[hsa-miR-106a-5p;hsa-miR-200c-3p][hsa-miR-138-5p;hsa-miR-200c-3p][hsa-miR-138-5p;hsa-miR-200c-3p;hsa-miR-3691-5p][hsa-miR-23b-3p;hsa-miR-335-3p][hsa-miR-23b-3p;hsa-miR-429;hsa-miR-548f][hsa-miR-23b-3p;hsa-miR-548f][hsa-miR-34c-3p;hsa-miR-548f]
AES	3	[hsa-let-7f-2-3p;hsa-miR-342-3p;hsa-miR-506-3p][hsa-miR-124-3p;hsa-miR-342-3p][hsa-miR-3177-3p;hsa-miR-342-3p]
AFAP1	1	[hsa-miR-338-5p;hsa-miR-9-5p]
AFAP1L1	1	[hsa-miR-3154;hsa-miR-642a-5p]
AFAP1L2	7	[hsa-miR-1266;hsa-miR-30a-5p;hsa-miR-30e-5p][hsa-miR-142-3p;hsa-miR-30e-5p;hsa-miR-3607-3p][hsa-miR-216b;hsa-miR-30e-5p][hsa-miR-30a-5p;hsa-miR-30c-5p;hsa-miR-30e-5p][hsa-miR-30a-5p;hsa-miR-30e-5p][hsa-miR-30a-5p;hsa-miR-30e-5p;hsa-miR-3607-3p][hsa-miR-30d-5p;hsa-miR-30e-5p]
AFF1	7	[hsa-miR-106a-5p;hsa-miR-19a-3p;hsa-miR-19b-3p][hsa-miR-19a-3p;hsa-miR-19b-3p][hsa-miR-19a-3p;hsa-miR-205-5p][hsa-miR-19a-3p;hsa-miR-205-5p;hsa-miR-93-5p][hsa-miR-19a-3p;hsa-miR-27a-3p][hsa-miR-19a-3p;hsa-miR-342-3p;hsa-miR-93-5p][hsa-miR-342-3p;hsa-miR-93-5p]
AFF2	7	[hsa-let-7d-5p;hsa-miR-548b-5p;hsa-miR-93-5p][hsa-let-7d-5p;hsa-miR-93-5p][hsa-miR-18a-3p;hsa-miR-452-5p;hsa-miR-934][hsa-miR-19a-3p;hsa-miR-452-5p][hsa-miR-19b-2-5p;hsa-miR-31-3p;hsa-miR-93-5p][hsa-miR-31-3p;hsa-miR-93-5p][hsa-miR-379-5p;hsa-miR-452-5p;hsa-miR-934]
AFF3	9	[hsa-miR-1468;hsa-miR-224-5p;hsa-miR-618][hsa-miR-1468;hsa-miR-224-5p;hsa-miR-934][hsa-miR-224-5p;hsa-miR-23c][hsa-miR-224-5p;hsa-miR-30c-5p;hsa-miR-934][hsa-miR-224-5p;hsa-miR-340-5p;hsa-miR-618][hsa-miR-224-5p;hsa-miR-582-5p;hsa-miR-934][hsa-miR-224-5p;hsa-miR-618][hsa-miR-224-5p;hsa-miR-655;hsa-miR-934][hsa-miR-224-5p;hsa-miR-934]
AFF4	7	[hsa-miR-103a-3p;hsa-miR-374c-5p;hsa-miR-500a-3p][hsa-miR-153;hsa-miR-183-5p;hsa-miR-505-3p][hsa-miR-153;hsa-miR-505-3p][hsa-miR-29a-3p;hsa-miR-3156-5p;hsa-miR-505-3p][hsa-miR-29a-3p;hsa-miR-505-3p][hsa-miR-374c-5p;hsa-miR-500a-3p][hsa-miR-625-3p;hsa-miR-92b-3p]
AFG3L2	6	[hsa-miR-1226-3p;hsa-miR-1301;hsa-miR-655][hsa-miR-1226-3p;hsa-miR-181c-5p;hsa-miR-186-5p][hsa-miR-1226-3p;hsa-miR-483-5p;hsa-miR-655][hsa-miR-1226-3p;hsa-miR-655][hsa-miR-181c-5p;hsa-miR-655][hsa-miR-196b-3p;hsa-miR-767-5p]
AFTPH	4	[hsa-miR-1248;hsa-miR-497-3p][hsa-miR-141-3p;hsa-miR-7-1-3p][hsa-miR-148a-5p;hsa-miR-3653][hsa-miR-3660;hsa-miR-421]
AGAP1	8	[hsa-miR-1248;hsa-miR-25-3p][hsa-miR-1248;hsa-miR-25-3p;hsa-miR-377-3p][hsa-miR-1248;hsa-miR-25-3p;hsa-miR-514a-3p][hsa-miR-1248;hsa-miR-450b-5p][hsa-miR-223-3p;hsa-miR-32-3p;hsa-miR-449b-5p][hsa-miR-25-3p;hsa-miR-32-3p;hsa-miR-491-3p][hsa-miR-32-3p;hsa-miR-449b-5p][hsa-miR-32-3p;hsa-miR-491-3p]
AGAP2	7	[hsa-miR-150-5p;hsa-miR-15b-5p][hsa-miR-150-5p;hsa-miR-15b-5p;hsa-miR-32-5p][hsa-miR-150-5p;hsa-miR-15b-5p;hsa-miR-551b-3p][hsa-miR-150-5p;hsa-miR-33a-5p][hsa-miR-214-3p;hsa-miR-2355-5p;hsa-miR-381][hsa-miR-214-3p;hsa-miR-381][hsa-miR-381;hsa-miR-592]
AGAP3	6	[hsa-miR-10a-5p;hsa-miR-26a-1-3p;hsa-miR-329][hsa-miR-10a-5p;hsa-miR-329][hsa-miR-10a-5p;hsa-miR-329;hsa-miR-765][hsa-miR-10b-5p;hsa-miR-1306-3p;hsa-miR-550a-5p][hsa-miR-10b-5p;hsa-miR-550a-5p][hsa-miR-339-5p;hsa-miR-3620;hsa-miR-550a-5p]
AGAP5	1	[hsa-miR-17-3p;hsa-miR-377-3p]
AGAP6	3	[hsa-miR-17-3p;hsa-miR-203][hsa-miR-17-3p;hsa-miR-203;hsa-miR-223-5p][hsa-miR-17-3p;hsa-miR-223-5p]
AGBL2	2	[hsa-let-7b-5p;hsa-miR-590-3p][hsa-miR-373-5p;hsa-miR-98]
AGBL3	4	[hsa-miR-27a-3p;hsa-miR-27b-3p;hsa-miR-548x-3p][hsa-miR-27a-3p;hsa-miR-27b-3p;hsa-miR-876-5p][hsa-miR-27b-3p;hsa-miR-548x-3p][hsa-miR-27b-3p;hsa-miR-876-5p]
AGBL4	6	[hsa-let-7a-5p;hsa-miR-192-3p;hsa-miR-24-2-5p][hsa-let-7a-5p;hsa-miR-193a-5p;hsa-miR-24-2-5p][hsa-let-7a-5p;hsa-miR-196b-5p][hsa-let-7a-5p;hsa-miR-24-2-5p][hsa-let-7a-5p;hsa-miR-24-2-5p;hsa-miR-3189-3p][hsa-miR-124-3p;hsa-miR-196b-5p]
AGBL5	7	[hsa-miR-133b;hsa-miR-186-3p;hsa-miR-22-5p][hsa-miR-186-3p;hsa-miR-2113;hsa-miR-22-5p][hsa-miR-186-3p;hsa-miR-22-5p][hsa-miR-186-3p;hsa-miR-22-5p;hsa-miR-658][hsa-miR-2113;hsa-miR-24-3p][hsa-miR-22-5p;hsa-miR-3163][hsa-miR-24-3p;hsa-miR-581]
AGFG1	6	[hsa-let-7a-3p;hsa-miR-200b-3p;hsa-miR-374c-5p][hsa-let-7a-3p;hsa-miR-374c-5p][hsa-miR-200b-3p;hsa-miR-502-3p][hsa-miR-301a-3p;hsa-miR-502-3p;hsa-miR-942][hsa-miR-452-5p;hsa-miR-942][hsa-miR-502-3p;hsa-miR-942]
AGFG2	6	[hsa-miR-106b-5p;hsa-miR-17-5p;hsa-miR-20b-5p][hsa-miR-17-5p;hsa-miR-20b-5p][hsa-miR-17-5p;hsa-miR-374b-5p][hsa-miR-20b-5p;hsa-miR-372;hsa-miR-410][hsa-miR-20b-5p;hsa-miR-410;hsa-miR-520c-3p][hsa-miR-20b-5p;hsa-miR-410;hsa-miR-656]
AGGF1	6	[hsa-miR-125a-5p;hsa-miR-22-5p][hsa-miR-125a-5p;hsa-miR-22-5p;hsa-miR-92a-3p][hsa-miR-1283;hsa-miR-92a-3p][hsa-miR-27a-3p;hsa-miR-92a-3p][hsa-miR-27a-3p;hsa-miR-92a-3p;hsa-miR-92b-3p][hsa-miR-27a-3p;hsa-miR-92b-3p]
AGK	2	[hsa-miR-1260b;hsa-miR-16-2-3p;hsa-miR-195-3p][hsa-miR-16-2-3p;hsa-miR-195-3p]
AGL	2	[hsa-miR-1248;hsa-miR-374a-5p;hsa-miR-374b-5p][hsa-miR-148a-5p;hsa-miR-369-3p;hsa-miR-3910]
AGMAT	2	[hsa-miR-146a-5p;hsa-miR-146b-5p][hsa-miR-146a-5p;hsa-miR-148a-5p]
AGPAT1	7	[hsa-miR-129-5p;hsa-miR-181a-2-3p][hsa-miR-129-5p;hsa-miR-181a-5p;hsa-miR-26b-3p][hsa-miR-129-5p;hsa-miR-181b-5p][hsa-miR-129-5p;hsa-miR-26b-3p][hsa-miR-181a-5p;hsa-miR-517-5p][hsa-miR-181a-5p;hsa-miR-517-5p;hsa-miR-548x-3p][hsa-miR-181b-5p;hsa-miR-181d]
AGPAT3	4	[hsa-miR-219-5p;hsa-miR-301b;hsa-miR-889][hsa-miR-219-5p;hsa-miR-4306;hsa-miR-889][hsa-miR-4306;hsa-miR-454-3p;hsa-miR-889][hsa-miR-454-3p;hsa-miR-889]
AGPAT4	2	[hsa-miR-29a-3p;hsa-miR-29c-3p][hsa-miR-29b-3p;hsa-miR-29c-3p]
AGPAT5	2	[hsa-miR-19a-3p;hsa-miR-873-5p][hsa-miR-483-3p;hsa-miR-873-5p]
AGPAT6	7	[hsa-miR-190b;hsa-miR-203;hsa-miR-3910][hsa-miR-203;hsa-miR-3609;hsa-miR-4306][hsa-miR-203;hsa-miR-3617;hsa-miR-451a][hsa-miR-203;hsa-miR-379-5p;hsa-miR-451a][hsa-miR-203;hsa-miR-3910][hsa-miR-203;hsa-miR-3910;hsa-miR-451a][hsa-miR-203;hsa-miR-451a]
AGPAT9	7	[hsa-miR-130a-5p;hsa-miR-203][hsa-miR-203;hsa-miR-423-3p;hsa-miR-519a-5p][hsa-miR-203;hsa-miR-425-3p][hsa-miR-203;hsa-miR-425-3p;hsa-miR-519a-5p][hsa-miR-203;hsa-miR-519a-5p][hsa-miR-203;hsa-miR-519a-5p;hsa-miR-564][hsa-miR-3910;hsa-miR-519a-5p]
AGPS	9	[hsa-miR-203;hsa-miR-29b-1-5p;hsa-miR-92b-3p][hsa-miR-203;hsa-miR-320c][hsa-miR-203;hsa-miR-320c;hsa-miR-520d-3p][hsa-miR-203;hsa-miR-320c;hsa-miR-570-3p][hsa-miR-203;hsa-miR-33b-5p;hsa-miR-570-3p][hsa-miR-203;hsa-miR-363-3p;hsa-miR-570-3p][hsa-miR-203;hsa-miR-501-5p;hsa-miR-92b-3p][hsa-miR-203;hsa-miR-570-3p][hsa-miR-203;hsa-miR-92b-3p]
AGRN	3	[hsa-miR-205-3p;hsa-miR-27a-3p;hsa-miR-513a-5p][hsa-miR-224-5p;hsa-miR-524-5p][hsa-miR-27b-3p;hsa-miR-513a-5p]
AGTPBP1	5	[hsa-miR-17-3p;hsa-miR-182-5p;hsa-miR-577][hsa-miR-17-3p;hsa-miR-2276][hsa-miR-17-3p;hsa-miR-455-3p][hsa-miR-17-3p;hsa-miR-455-3p;hsa-miR-590-3p][hsa-miR-17-3p;hsa-miR-548v]
AGTR1	3	[hsa-miR-34a-5p;hsa-miR-455-3p][hsa-miR-34a-5p;hsa-miR-455-3p;hsa-miR-944][hsa-miR-455-3p;hsa-miR-944]
AGTR2	7	[hsa-miR-17-5p;hsa-miR-2115-3p][hsa-miR-17-5p;hsa-miR-2115-3p;hsa-miR-3074-3p][hsa-miR-17-5p;hsa-miR-2115-3p;hsa-miR-330-3p][hsa-miR-17-5p;hsa-miR-224-5p][hsa-miR-17-5p;hsa-miR-224-5p;hsa-miR-373-3p][hsa-miR-17-5p;hsa-miR-224-5p;hsa-miR-497-3p][hsa-miR-17-5p;hsa-miR-330-3p]
AGXT2L1	2	[hsa-miR-378a-3p;hsa-miR-378b;hsa-miR-378c][hsa-miR-378a-3p;hsa-miR-378c]
AHCTF1	7	[hsa-let-7a-5p;hsa-let-7i-5p;hsa-miR-1283][hsa-let-7a-5p;hsa-miR-1283][hsa-let-7f-5p;hsa-miR-1283;hsa-miR-218-5p][hsa-let-7g-5p;hsa-miR-1283][hsa-let-7i-5p;hsa-miR-1283][hsa-let-7i-5p;hsa-miR-1283;hsa-miR-664-3p][hsa-miR-106b-5p;hsa-miR-1283;hsa-miR-664-3p]
AHCY	3	[hsa-miR-132-3p;hsa-miR-4326;hsa-miR-767-5p][hsa-miR-132-3p;hsa-miR-767-5p][hsa-miR-4326;hsa-miR-767-5p]
AHCYL1	8	[hsa-miR-135b-5p;hsa-miR-182-5p][hsa-miR-135b-5p;hsa-miR-186-5p;hsa-miR-29a-5p][hsa-miR-135b-5p;hsa-miR-22-5p][hsa-miR-135b-5p;hsa-miR-22-5p;hsa-miR-31-5p][hsa-miR-135b-5p;hsa-miR-29a-5p][hsa-miR-135b-5p;hsa-miR-330-3p;hsa-miR-502-3p][hsa-miR-135b-5p;hsa-miR-502-3p][hsa-miR-664-3p;hsa-miR-92a-3p]
AHCYL2	7	[hsa-miR-103a-3p;hsa-miR-2115-3p;hsa-miR-3682-3p][hsa-miR-103a-3p;hsa-miR-3682-3p;hsa-miR-376c][hsa-miR-1270;hsa-miR-155-5p][hsa-miR-1270;hsa-miR-155-5p;hsa-miR-497-5p][hsa-miR-155-5p;hsa-miR-580][hsa-miR-19b-1-5p;hsa-miR-3682-3p;hsa-miR-376c][hsa-miR-2115-3p;hsa-miR-3682-3p]
AHDC1	7	[hsa-let-7f-1-3p;hsa-miR-1976][hsa-let-7f-1-3p;hsa-miR-1976;hsa-miR-548l][hsa-let-7g-3p;hsa-miR-3614-5p][hsa-let-7g-3p;hsa-miR-3614-5p;hsa-miR-548n][hsa-let-7g-3p;hsa-miR-539-5p][hsa-miR-140-3p;hsa-miR-191-5p][hsa-miR-191-5p;hsa-miR-25-5p]
AHI1	5	[hsa-miR-1229;hsa-miR-576-5p][hsa-miR-1271-5p;hsa-miR-576-5p][hsa-miR-135b-3p;hsa-miR-3170;hsa-miR-500a-3p][hsa-miR-135b-3p;hsa-miR-500a-3p][hsa-miR-500a-3p;hsa-miR-590-3p]
AHNAK	6	[hsa-miR-106b-5p;hsa-miR-501-3p;hsa-miR-512-3p][hsa-miR-106b-5p;hsa-miR-744-3p][hsa-miR-28-5p;hsa-miR-30d-5p][hsa-miR-28-5p;hsa-miR-30d-5p;hsa-miR-3910][hsa-miR-30a-5p;hsa-miR-501-3p][hsa-miR-501-3p;hsa-miR-512-3p]
AHNAK2	6	[hsa-miR-15b-5p;hsa-miR-16-5p;hsa-miR-3190-5p][hsa-miR-15b-5p;hsa-miR-16-5p;hsa-miR-497-5p][hsa-miR-16-5p;hsa-miR-195-5p;hsa-miR-497-5p][hsa-miR-16-5p;hsa-miR-497-5p][hsa-miR-195-5p;hsa-miR-3190-5p;hsa-miR-497-5p][hsa-miR-195-5p;hsa-miR-497-5p]
AHR	6	[hsa-miR-1284;hsa-miR-16-2-3p][hsa-miR-1284;hsa-miR-16-2-3p;hsa-miR-3927][hsa-miR-1284;hsa-miR-16-2-3p;hsa-miR-483-3p][hsa-miR-1284;hsa-miR-200a-5p;hsa-miR-3927][hsa-miR-1284;hsa-miR-3927][hsa-miR-483-3p;hsa-miR-507]
AHSA1	7	[hsa-let-7g-3p;hsa-miR-1226-3p;hsa-miR-30c-5p][hsa-let-7g-3p;hsa-miR-30c-5p;hsa-miR-424-5p][hsa-miR-1226-3p;hsa-miR-30c-5p][hsa-miR-1226-3p;hsa-miR-3166][hsa-miR-30c-5p;hsa-miR-424-5p][hsa-miR-30c-5p;hsa-miR-501-3p][hsa-miR-3619-5p;hsa-miR-466]
AHSA2	6	[hsa-miR-135a-5p;hsa-miR-508-3p][hsa-miR-135b-5p;hsa-miR-26a-1-3p;hsa-miR-26a-2-3p][hsa-miR-26a-1-3p;hsa-miR-26a-2-3p][hsa-miR-505-3p;hsa-miR-542-3p][hsa-miR-505-3p;hsa-miR-582-3p;hsa-miR-942][hsa-miR-582-3p;hsa-miR-942]
AICDA	1	[hsa-miR-29a-3p;hsa-miR-452-5p]
AIDA	7	[hsa-miR-153;hsa-miR-224-5p;hsa-miR-513b][hsa-miR-221-3p;hsa-miR-222-3p;hsa-miR-224-5p][hsa-miR-222-3p;hsa-miR-224-5p][hsa-miR-222-3p;hsa-miR-224-5p;hsa-miR-513b][hsa-miR-224-5p;hsa-miR-513b][hsa-miR-224-5p;hsa-miR-522-3p][hsa-miR-29b-2-5p;hsa-miR-450b-5p]
AIF1	4	[hsa-let-7g-5p;hsa-miR-154-3p][hsa-let-7g-5p;hsa-miR-26b-3p][hsa-miR-127-3p;hsa-miR-154-3p;hsa-miR-499a-3p][hsa-miR-127-3p;hsa-miR-485-3p;hsa-miR-487b]
AIF1L	7	[hsa-miR-206;hsa-miR-570-3p][hsa-miR-206;hsa-miR-570-3p;hsa-miR-582-3p][hsa-miR-570-3p;hsa-miR-582-3p;hsa-miR-590-5p][hsa-miR-570-3p;hsa-miR-590-5p][hsa-miR-570-3p;hsa-miR-590-5p;hsa-miR-9-3p][hsa-miR-582-3p;hsa-miR-590-5p][hsa-miR-590-5p;hsa-miR-641]
AIFM1	7	[hsa-let-7b-5p;hsa-miR-202-3p][hsa-let-7b-5p;hsa-miR-202-3p;hsa-miR-323b-5p][hsa-let-7b-5p;hsa-miR-202-3p;hsa-miR-766-3p][hsa-let-7b-5p;hsa-miR-20a-3p][hsa-let-7b-5p;hsa-miR-20a-3p;hsa-miR-323b-5p][hsa-let-7c;hsa-miR-374b-3p;hsa-miR-487b][hsa-let-7c;hsa-miR-487b]
AIFM2	1	[hsa-miR-137;hsa-miR-502-3p]
AIFM3	2	[hsa-miR-1271-5p;hsa-miR-590-3p][hsa-miR-1271-5p;hsa-miR-590-3p;hsa-miR-96-5p]
AIG1	1	[hsa-miR-454-3p;hsa-miR-519c-3p]
AIM1L	5	[hsa-miR-181b-5p;hsa-miR-21-5p][hsa-miR-181d;hsa-miR-21-5p][hsa-miR-181d;hsa-miR-3065-5p][hsa-miR-181d;hsa-miR-590-5p][hsa-miR-3065-5p;hsa-miR-590-5p]
AIM2	1	[hsa-miR-1301;hsa-miR-4306]
AIMP1	4	[hsa-miR-3074-3p;hsa-miR-642b-3p][hsa-miR-501-5p;hsa-miR-514a-3p;hsa-miR-642b-3p][hsa-miR-501-5p;hsa-miR-548o-3p][hsa-miR-548o-3p;hsa-miR-642b-3p]
AIP	1	[hsa-miR-135b-5p;hsa-miR-577]
AIPL1	1	[hsa-miR-548t-5p;hsa-miR-590-3p]
AIRE	1	[hsa-miR-486-3p;hsa-miR-520a-5p]
AJAP1	6	[hsa-miR-101-3p;hsa-miR-141-3p][hsa-miR-101-3p;hsa-miR-3156-5p;hsa-miR-383][hsa-miR-101-3p;hsa-miR-361-3p;hsa-miR-383][hsa-miR-101-3p;hsa-miR-383][hsa-miR-1224-5p;hsa-miR-188-3p][hsa-miR-1224-5p;hsa-miR-18b-5p]
AJUBA	7	[hsa-miR-137;hsa-miR-16-5p][hsa-miR-137;hsa-miR-16-5p;hsa-miR-193a-3p][hsa-miR-15b-5p;hsa-miR-193a-3p;hsa-miR-9-5p][hsa-miR-15b-5p;hsa-miR-545-5p;hsa-miR-9-5p][hsa-miR-15b-5p;hsa-miR-9-5p][hsa-miR-16-5p;hsa-miR-203][hsa-miR-20a-5p;hsa-miR-3161]
AK1	3	[hsa-miR-340-3p;hsa-miR-512-3p][hsa-miR-340-3p;hsa-miR-512-3p;hsa-miR-570-3p][hsa-miR-512-3p;hsa-miR-570-3p]
AK2	8	[hsa-miR-129-5p;hsa-miR-200a-3p][hsa-miR-129-5p;hsa-miR-200a-3p;hsa-miR-504][hsa-miR-129-5p;hsa-miR-200a-3p;hsa-miR-943][hsa-miR-200a-3p;hsa-miR-218-5p][hsa-miR-200a-3p;hsa-miR-218-5p;hsa-miR-3140-3p][hsa-miR-200a-3p;hsa-miR-27a-3p][hsa-miR-200a-3p;hsa-miR-27a-3p;hsa-miR-27b-3p][hsa-miR-3136-5p;hsa-miR-9-5p]
AK3	3	[hsa-miR-1271-5p;hsa-miR-570-3p][hsa-miR-449b-5p;hsa-miR-570-3p;hsa-miR-96-5p][hsa-miR-570-3p;hsa-miR-96-5p]
AK4	5	[hsa-miR-195-5p;hsa-miR-31-5p][hsa-miR-195-5p;hsa-miR-31-5p;hsa-miR-9-5p][hsa-miR-195-5p;hsa-miR-323b-3p][hsa-miR-195-5p;hsa-miR-9-5p][hsa-miR-323b-3p;hsa-miR-576-5p]
AK5	5	[hsa-miR-196a-3p;hsa-miR-361-5p;hsa-miR-589-5p][hsa-miR-361-5p;hsa-miR-511;hsa-miR-589-5p][hsa-miR-361-5p;hsa-miR-589-5p][hsa-miR-374a-3p;hsa-miR-455-5p;hsa-miR-589-5p][hsa-miR-455-5p;hsa-miR-589-5p]
AKAP1	4	[hsa-miR-125a-5p;hsa-miR-375][hsa-miR-125b-5p;hsa-miR-148a-3p;hsa-miR-301a-3p][hsa-miR-148a-3p;hsa-miR-301a-3p;hsa-miR-3120-3p][hsa-miR-301a-3p;hsa-miR-519e-5p]
AKAP10	6	[hsa-miR-125b-2-3p;hsa-miR-148a-5p][hsa-miR-125b-2-3p;hsa-miR-148a-5p;hsa-miR-219-5p][hsa-miR-148a-5p;hsa-miR-219-5p][hsa-miR-148a-5p;hsa-miR-219-5p;hsa-miR-512-3p][hsa-miR-219-5p;hsa-miR-512-3p][hsa-miR-219-5p;hsa-miR-590-3p]
AKAP11	7	[hsa-miR-106b-5p;hsa-miR-15a-5p][hsa-miR-106b-5p;hsa-miR-15a-5p;hsa-miR-497-3p][hsa-miR-106b-5p;hsa-miR-15a-5p;hsa-miR-497-5p][hsa-miR-106b-5p;hsa-miR-224-5p;hsa-miR-424-5p][hsa-miR-106b-5p;hsa-miR-323a-3p;hsa-miR-424-5p][hsa-miR-106b-5p;hsa-miR-424-5p;hsa-miR-92a-3p][hsa-miR-17-5p;hsa-miR-497-5p]
AKAP12	5	[hsa-miR-145-5p;hsa-miR-186-5p;hsa-miR-33a-5p][hsa-miR-145-5p;hsa-miR-33a-5p][hsa-miR-15b-5p;hsa-miR-16-5p;hsa-miR-379-3p][hsa-miR-15b-5p;hsa-miR-33a-5p][hsa-miR-16-5p;hsa-miR-33a-5p]
AKAP13	5	[hsa-let-7a-3p;hsa-miR-126-3p][hsa-let-7a-3p;hsa-miR-3688-3p;hsa-miR-582-5p][hsa-let-7a-3p;hsa-miR-582-5p][hsa-miR-20a-5p;hsa-miR-577][hsa-miR-29b-3p;hsa-miR-577]
AKAP17A	4	[hsa-miR-197-3p;hsa-miR-32-3p][hsa-miR-197-3p;hsa-miR-374b-3p][hsa-miR-197-3p;hsa-miR-582-3p][hsa-miR-582-3p;hsa-miR-625-5p]
AKAP3	8	[hsa-miR-1296;hsa-miR-140-5p;hsa-miR-519a-5p][hsa-miR-1296;hsa-miR-519a-5p][hsa-miR-140-5p;hsa-miR-31-5p;hsa-miR-519a-5p][hsa-miR-1915-5p;hsa-miR-31-5p;hsa-miR-519a-5p][hsa-miR-199b-5p;hsa-miR-222-5p][hsa-miR-222-5p;hsa-miR-31-5p][hsa-miR-222-5p;hsa-miR-31-5p;hsa-miR-519a-5p][hsa-miR-31-5p;hsa-miR-519a-5p]
AKAP5	6	[hsa-miR-10a-3p;hsa-miR-20a-5p;hsa-miR-520e][hsa-miR-10a-3p;hsa-miR-20a-5p;hsa-miR-625-3p][hsa-miR-1257;hsa-miR-20a-5p;hsa-miR-520e][hsa-miR-129-2-3p;hsa-miR-20a-5p;hsa-miR-625-3p][hsa-miR-20a-5p;hsa-miR-520e][hsa-miR-20a-5p;hsa-miR-625-3p]
AKAP6	7	[hsa-miR-26b-5p;hsa-miR-33a-3p;hsa-miR-381][hsa-miR-26b-5p;hsa-miR-34c-3p][hsa-miR-26b-5p;hsa-miR-381][hsa-miR-30d-3p;hsa-miR-548x-3p;hsa-miR-578][hsa-miR-30d-3p;hsa-miR-578][hsa-miR-3692-3p;hsa-miR-578][hsa-miR-548x-3p;hsa-miR-578]
AKAP7	9	[hsa-miR-1269a;hsa-miR-3176;hsa-miR-365a-3p][hsa-miR-1269a;hsa-miR-365a-3p][hsa-miR-205-5p;hsa-miR-3176;hsa-miR-365a-3p][hsa-miR-205-5p;hsa-miR-365a-3p][hsa-miR-221-3p;hsa-miR-31-5p;hsa-miR-365a-3p][hsa-miR-221-3p;hsa-miR-365a-3p][hsa-miR-221-3p;hsa-miR-365a-3p;hsa-miR-3667-3p][hsa-miR-221-3p;hsa-miR-365a-3p;hsa-miR-527][hsa-miR-3176;hsa-miR-365a-3p]
AKAP9	6	[hsa-miR-133a;hsa-miR-29b-1-5p][hsa-miR-17-5p;hsa-miR-20a-5p;hsa-miR-32-3p][hsa-miR-17-5p;hsa-miR-20b-5p;hsa-miR-379-5p][hsa-miR-17-5p;hsa-miR-32-3p][hsa-miR-17-5p;hsa-miR-379-5p][hsa-miR-29b-1-5p;hsa-miR-93-5p]
AKIRIN1	6	[hsa-miR-16-1-3p;hsa-miR-16-2-3p;hsa-miR-450b-5p][hsa-miR-16-2-3p;hsa-miR-181a-2-3p;hsa-miR-410][hsa-miR-16-2-3p;hsa-miR-200a-3p;hsa-miR-410][hsa-miR-16-2-3p;hsa-miR-3929;hsa-miR-410][hsa-miR-16-2-3p;hsa-miR-410][hsa-miR-16-2-3p;hsa-miR-450b-5p]
AKIRIN2	7	[hsa-miR-106b-3p;hsa-miR-3065-5p][hsa-miR-106b-3p;hsa-miR-548f][hsa-miR-1301;hsa-miR-545-5p][hsa-miR-1301;hsa-miR-545-5p;hsa-miR-552][hsa-miR-130a-3p;hsa-miR-3662][hsa-miR-362-5p;hsa-miR-3662][hsa-miR-3662;hsa-miR-4254]
AKNA	3	[hsa-let-7a-3p;hsa-let-7b-3p][hsa-let-7a-3p;hsa-let-7f-1-3p][hsa-let-7b-3p;hsa-let-7f-1-3p;hsa-miR-3121-3p]
AKR1B10	2	[hsa-miR-3065-3p;hsa-miR-3148][hsa-miR-3065-3p;hsa-miR-383]
AKR1D1	5	[hsa-miR-134;hsa-miR-16-1-3p;hsa-miR-664-3p][hsa-miR-134;hsa-miR-664-3p][hsa-miR-134;hsa-miR-664-3p;hsa-miR-873-5p][hsa-miR-135a-5p;hsa-miR-664-3p][hsa-miR-664-3p;hsa-miR-873-5p]
AKR1E2	4	[hsa-miR-135a-5p;hsa-miR-135b-5p;hsa-miR-577][hsa-miR-135a-5p;hsa-miR-18a-3p;hsa-miR-577][hsa-miR-135a-5p;hsa-miR-577][hsa-miR-18a-3p;hsa-miR-577]
AKR7A3	2	[hsa-miR-3065-3p;hsa-miR-34b-5p][hsa-miR-3065-3p;hsa-miR-34b-5p;hsa-miR-579]
AKR7L	2	[hsa-miR-27b-5p;hsa-miR-3913-5p][hsa-miR-27b-5p;hsa-miR-3913-5p;hsa-miR-552]
AKT1	4	[hsa-miR-105-5p;hsa-miR-155-5p][hsa-miR-105-5p;hsa-miR-409-3p][hsa-miR-155-5p;hsa-miR-200c-3p;hsa-miR-409-3p][hsa-miR-155-5p;hsa-miR-561-3p]
AKT1S1	7	[hsa-miR-125a-5p;hsa-miR-188-5p][hsa-miR-125a-5p;hsa-miR-188-5p;hsa-miR-548f][hsa-miR-125a-5p;hsa-miR-216b][hsa-miR-125a-5p;hsa-miR-548e][hsa-miR-125a-5p;hsa-miR-548f][hsa-miR-125b-5p;hsa-miR-142-3p][hsa-miR-125b-5p;hsa-miR-142-3p;hsa-miR-4306]
AKT2	5	[hsa-miR-124-3p;hsa-miR-200b-3p][hsa-miR-124-3p;hsa-miR-200b-3p;hsa-miR-508-3p][hsa-miR-124-3p;hsa-miR-429][hsa-miR-200c-3p;hsa-miR-429][hsa-miR-200c-3p;hsa-miR-429;hsa-miR-508-3p]
AKT3	6	[hsa-miR-125b-5p;hsa-miR-140-3p][hsa-miR-125b-5p;hsa-miR-140-3p;hsa-miR-24-3p][hsa-miR-125b-5p;hsa-miR-221-5p;hsa-miR-24-3p][hsa-miR-140-3p;hsa-miR-195-5p][hsa-miR-140-3p;hsa-miR-320b;hsa-miR-501-3p][hsa-miR-140-3p;hsa-miR-501-3p]
AKTIP	6	[hsa-let-7a-3p;hsa-miR-106a-5p;hsa-miR-93-5p][hsa-miR-106a-5p;hsa-miR-19b-1-5p;hsa-miR-2276][hsa-miR-106a-5p;hsa-miR-224-3p;hsa-miR-2276][hsa-miR-106a-5p;hsa-miR-93-5p][hsa-miR-20b-5p;hsa-miR-28-3p][hsa-miR-335-3p;hsa-miR-767-3p]
ALAD	5	[hsa-miR-15b-5p;hsa-miR-29b-2-5p][hsa-miR-15b-5p;hsa-miR-29b-2-5p;hsa-miR-34b-5p][hsa-miR-29b-2-5p;hsa-miR-3168;hsa-miR-9-5p][hsa-miR-3168;hsa-miR-34b-5p;hsa-miR-9-5p][hsa-miR-3168;hsa-miR-9-5p]
ALAS1	4	[hsa-miR-130a-5p;hsa-miR-142-5p;hsa-miR-410][hsa-miR-130a-5p;hsa-miR-23c;hsa-miR-410][hsa-miR-142-5p;hsa-miR-23a-3p][hsa-miR-142-5p;hsa-miR-410]
ALAS2	1	[hsa-miR-330-3p;hsa-miR-636]
ALCAM	6	[hsa-miR-10b-3p;hsa-miR-18a-5p][hsa-miR-10b-3p;hsa-miR-18a-5p;hsa-miR-192-5p][hsa-miR-10b-3p;hsa-miR-18a-5p;hsa-miR-3140-3p][hsa-miR-10b-3p;hsa-miR-18a-5p;hsa-miR-548e][hsa-miR-2115-3p;hsa-miR-378a-3p][hsa-miR-2115-3p;hsa-miR-7-1-3p]
ALDH18A1	3	[hsa-miR-224-5p;hsa-miR-26a-5p][hsa-miR-224-5p;hsa-miR-26a-5p;hsa-miR-548l][hsa-miR-224-5p;hsa-miR-548l]
ALDH1A2	7	[hsa-miR-136-3p;hsa-miR-142-3p;hsa-miR-542-3p][hsa-miR-136-3p;hsa-miR-542-3p][hsa-miR-136-3p;hsa-miR-542-3p;hsa-miR-556-5p][hsa-miR-18a-3p;hsa-miR-3121-3p;hsa-miR-542-3p][hsa-miR-18a-3p;hsa-miR-542-3p][hsa-miR-1913;hsa-miR-345-5p][hsa-miR-1913;hsa-miR-345-5p;hsa-miR-744-3p]
ALDH1A3	7	[hsa-miR-144-3p;hsa-miR-183-3p;hsa-miR-625-3p][hsa-miR-183-3p;hsa-miR-200c-3p;hsa-miR-625-3p][hsa-miR-183-3p;hsa-miR-20b-5p;hsa-miR-625-3p][hsa-miR-183-3p;hsa-miR-34b-5p;hsa-miR-625-3p][hsa-miR-183-3p;hsa-miR-625-3p][hsa-miR-183-3p;hsa-miR-625-3p;hsa-miR-93-5p][hsa-miR-29a-5p;hsa-miR-452-3p]
ALDH1L2	1	[hsa-miR-223-5p;hsa-miR-589-3p]
ALDH3A2	3	[hsa-miR-130b-3p;hsa-miR-222-5p;hsa-miR-548j][hsa-miR-130b-3p;hsa-miR-301b;hsa-miR-548j][hsa-miR-222-5p;hsa-miR-548j]
ALDH4A1	1	[hsa-miR-184;hsa-miR-27a-3p]
ALDH6A1	4	[hsa-miR-376a-3p;hsa-miR-376b;hsa-miR-449c-5p][hsa-miR-376b;hsa-miR-449c-5p][hsa-miR-376b;hsa-miR-449c-5p;hsa-miR-539-5p][hsa-miR-376b;hsa-miR-449c-5p;hsa-miR-616-5p]
ALDOA	5	[hsa-miR-1271-5p;hsa-miR-3065-3p;hsa-miR-449b-5p][hsa-miR-1271-5p;hsa-miR-449b-5p;hsa-miR-499a-3p][hsa-miR-3121-3p;hsa-miR-449b-5p][hsa-miR-34a-5p;hsa-miR-499a-3p][hsa-miR-362-3p;hsa-miR-449b-5p]
ALDOB	2	[hsa-miR-144-3p;hsa-miR-29a-5p;hsa-miR-877-5p][hsa-miR-144-3p;hsa-miR-3679-3p;hsa-miR-877-5p]
ALDOC	4	[hsa-miR-107;hsa-miR-153][hsa-miR-107;hsa-miR-153;hsa-miR-324-3p][hsa-miR-153;hsa-miR-20a-3p][hsa-miR-153;hsa-miR-20a-3p;hsa-miR-324-3p]
ALG10	4	[hsa-miR-27a-3p;hsa-miR-27b-3p][hsa-miR-27a-3p;hsa-miR-27b-3p;hsa-miR-30c-5p][hsa-miR-27a-3p;hsa-miR-30b-5p][hsa-miR-27a-3p;hsa-miR-30b-5p;hsa-miR-30c-5p]
ALG11	5	[hsa-miR-103a-2-5p;hsa-miR-135b-5p;hsa-miR-615-3p][hsa-miR-103a-2-5p;hsa-miR-135b-5p;hsa-miR-99b-3p][hsa-miR-129-1-3p;hsa-miR-135b-5p][hsa-miR-217;hsa-miR-3662][hsa-miR-3662;hsa-miR-545-5p]
ALG13	7	[hsa-miR-152;hsa-miR-19a-3p][hsa-miR-152;hsa-miR-19a-3p;hsa-miR-665][hsa-miR-155-5p;hsa-miR-19a-3p][hsa-miR-155-5p;hsa-miR-19a-3p;hsa-miR-543][hsa-miR-17-3p;hsa-miR-656][hsa-miR-19a-3p;hsa-miR-320a][hsa-miR-19a-3p;hsa-miR-545-5p]
ALG14	1	[hsa-miR-148b-5p;hsa-miR-3168]
ALG1L2	3	[hsa-miR-1229;hsa-miR-129-5p;hsa-miR-3130-5p][hsa-miR-1229;hsa-miR-657][hsa-miR-2115-5p;hsa-miR-3130-5p]
ALG2	2	[hsa-miR-20a-3p;hsa-miR-29b-2-5p;hsa-miR-376a-5p][hsa-miR-29b-2-5p;hsa-miR-93-3p]
ALG5	2	[hsa-miR-105-5p;hsa-miR-203][hsa-miR-105-5p;hsa-miR-205-3p]
ALG6	8	[hsa-miR-18a-3p;hsa-miR-192-5p][hsa-miR-18a-3p;hsa-miR-192-5p;hsa-miR-23b-3p][hsa-miR-192-5p;hsa-miR-580][hsa-miR-192-5p;hsa-miR-580;hsa-miR-9-5p][hsa-miR-23b-3p;hsa-miR-23c;hsa-miR-539-5p][hsa-miR-23c;hsa-miR-539-5p][hsa-miR-34a-5p;hsa-miR-539-5p;hsa-miR-580][hsa-miR-539-5p;hsa-miR-580]
ALG8	7	[hsa-miR-192-3p;hsa-miR-338-5p;hsa-miR-3927][hsa-miR-27a-3p;hsa-miR-338-5p;hsa-miR-3927][hsa-miR-323b-3p;hsa-miR-582-5p;hsa-miR-664-3p][hsa-miR-338-5p;hsa-miR-369-3p;hsa-miR-488-3p][hsa-miR-338-5p;hsa-miR-3927][hsa-miR-338-5p;hsa-miR-513a-5p][hsa-miR-582-5p;hsa-miR-664-3p]
ALG9	4	[hsa-miR-105-5p;hsa-miR-196a-3p][hsa-miR-105-5p;hsa-miR-30a-5p;hsa-miR-30d-5p][hsa-miR-105-5p;hsa-miR-30a-5p;hsa-miR-9-5p][hsa-miR-30b-5p;hsa-miR-30e-5p;hsa-miR-942]
ALK	2	[hsa-miR-1271-5p;hsa-miR-323a-5p;hsa-miR-96-5p][hsa-miR-1271-5p;hsa-miR-96-5p]
ALKBH1	5	[hsa-miR-188-5p;hsa-miR-3190-5p][hsa-miR-188-5p;hsa-miR-3190-5p;hsa-miR-33a-5p][hsa-miR-3190-5p;hsa-miR-33a-5p][hsa-miR-33a-5p;hsa-miR-551b-5p;hsa-miR-570-3p][hsa-miR-551b-5p;hsa-miR-570-3p]
ALKBH5	8	[hsa-miR-125b-5p;hsa-miR-146a-5p][hsa-miR-146a-5p;hsa-miR-18a-3p;hsa-miR-3128][hsa-miR-146a-5p;hsa-miR-18a-3p;hsa-miR-512-3p][hsa-miR-146a-5p;hsa-miR-2110;hsa-miR-512-3p][hsa-miR-146a-5p;hsa-miR-3128][hsa-miR-146a-5p;hsa-miR-3128;hsa-miR-885-5p][hsa-miR-146a-5p;hsa-miR-338-3p;hsa-miR-512-3p][hsa-miR-146a-5p;hsa-miR-512-3p;hsa-miR-9-5p]
ALKBH6	7	[hsa-miR-1226-3p;hsa-miR-199b-3p;hsa-miR-3663-3p][hsa-miR-1226-3p;hsa-miR-25-5p][hsa-miR-199b-3p;hsa-miR-29b-3p][hsa-miR-199b-3p;hsa-miR-29c-3p][hsa-miR-199b-3p;hsa-miR-29c-3p;hsa-miR-624-5p][hsa-miR-199b-3p;hsa-miR-3663-3p][hsa-miR-29c-3p;hsa-miR-744-5p]
ALMS1	1	[hsa-miR-548d-3p;hsa-miR-760]
ALOX12	1	[hsa-miR-15a-5p;hsa-miR-320d]
ALOX12B	1	[hsa-miR-129-5p;hsa-miR-3150b-3p]
ALPK3	3	[hsa-miR-32-5p;hsa-miR-33a-5p][hsa-miR-32-5p;hsa-miR-33a-5p;hsa-miR-363-3p][hsa-miR-32-5p;hsa-miR-33a-5p;hsa-miR-508-3p]
ALPL	5	[hsa-miR-10a-5p;hsa-miR-17-3p;hsa-miR-28-5p][hsa-miR-10a-5p;hsa-miR-580][hsa-miR-19b-1-5p;hsa-miR-29b-2-5p;hsa-miR-3926][hsa-miR-19b-1-5p;hsa-miR-3926][hsa-miR-19b-2-5p;hsa-miR-561-3p]
ALS2	7	[hsa-miR-142-5p;hsa-miR-16-1-3p][hsa-miR-144-3p;hsa-miR-3662][hsa-miR-323a-3p;hsa-miR-3662;hsa-miR-548e][hsa-miR-339-3p;hsa-miR-340-5p][hsa-miR-3662;hsa-miR-501-5p;hsa-miR-548e][hsa-miR-3662;hsa-miR-511][hsa-miR-3662;hsa-miR-548e]
ALS2CR11	3	[hsa-miR-136-5p;hsa-miR-182-3p;hsa-miR-519a-5p][hsa-miR-182-3p;hsa-miR-519a-5p][hsa-miR-218-1-3p;hsa-miR-224-3p;hsa-miR-548o-3p]
ALS2CR8	7	[hsa-let-7e-5p;hsa-miR-1304-5p;hsa-miR-33a-5p][hsa-miR-1304-5p;hsa-miR-224-5p][hsa-miR-1304-5p;hsa-miR-33a-5p][hsa-miR-1304-5p;hsa-miR-33a-5p;hsa-miR-3667-3p][hsa-miR-1304-5p;hsa-miR-33a-5p;hsa-miR-98][hsa-miR-200b-3p;hsa-miR-224-5p][hsa-miR-224-5p;hsa-miR-429]
ALX1	9	[hsa-let-7g-3p;hsa-miR-138-5p;hsa-miR-3942-5p][hsa-miR-1270;hsa-miR-138-5p;hsa-miR-3150a-3p][hsa-miR-138-5p;hsa-miR-192-5p;hsa-miR-3942-5p][hsa-miR-138-5p;hsa-miR-195-5p;hsa-miR-3942-5p][hsa-miR-138-5p;hsa-miR-206;hsa-miR-3942-5p][hsa-miR-138-5p;hsa-miR-3150a-3p][hsa-miR-138-5p;hsa-miR-320d;hsa-miR-3942-5p][hsa-miR-138-5p;hsa-miR-3942-5p][hsa-miR-138-5p;hsa-miR-3942-5p;hsa-miR-514a-3p]
ALX4	6	[hsa-miR-106a-5p;hsa-miR-106b-5p;hsa-miR-200b-5p][hsa-miR-106a-5p;hsa-miR-20a-5p;hsa-miR-548a-3p][hsa-miR-106a-5p;hsa-miR-3167][hsa-miR-106a-5p;hsa-miR-340-5p][hsa-miR-106a-5p;hsa-miR-876-5p][hsa-miR-106a-5p;hsa-miR-889]
ALYREF	6	[hsa-miR-16-5p;hsa-miR-196b-3p][hsa-miR-186-3p;hsa-miR-195-5p;hsa-miR-362-3p][hsa-miR-195-5p;hsa-miR-3619-5p][hsa-miR-195-5p;hsa-miR-362-3p][hsa-miR-195-5p;hsa-miR-3934][hsa-miR-196b-3p;hsa-miR-548d-3p]
AMACR	7	[hsa-miR-1269a;hsa-miR-429;hsa-miR-664-3p][hsa-miR-135b-3p;hsa-miR-216b;hsa-miR-92a-1-5p][hsa-miR-135b-3p;hsa-miR-92a-1-5p][hsa-miR-181d;hsa-miR-296-3p;hsa-miR-429][hsa-miR-181d;hsa-miR-429][hsa-miR-181d;hsa-miR-429;hsa-miR-501-5p][hsa-miR-3926;hsa-miR-429;hsa-miR-664-3p]
AMBN	7	[hsa-miR-205-3p;hsa-miR-21-3p;hsa-miR-576-5p][hsa-miR-20b-3p;hsa-miR-26b-5p;hsa-miR-769-5p][hsa-miR-20b-3p;hsa-miR-628-3p][hsa-miR-20b-3p;hsa-miR-769-5p][hsa-miR-21-3p;hsa-miR-3154;hsa-miR-576-5p][hsa-miR-26b-5p;hsa-miR-3130-5p;hsa-miR-576-5p][hsa-miR-3130-5p;hsa-miR-576-5p]
AMBRA1	5	[hsa-miR-101-5p;hsa-miR-200b-3p][hsa-miR-101-5p;hsa-miR-200b-3p;hsa-miR-376c][hsa-miR-200b-3p;hsa-miR-429][hsa-miR-200b-3p;hsa-miR-548d-3p][hsa-miR-23a-3p;hsa-miR-24-3p;hsa-miR-376c]
AMD1	7	[hsa-miR-1227;hsa-miR-30c-5p;hsa-miR-505-3p][hsa-miR-1227;hsa-miR-495;hsa-miR-505-3p][hsa-miR-1227;hsa-miR-505-3p][hsa-miR-1263;hsa-miR-519a-5p][hsa-miR-143-5p;hsa-miR-505-3p][hsa-miR-488-3p;hsa-miR-582-3p][hsa-miR-505-3p;hsa-miR-548b-3p]
AMELX	3	[hsa-miR-346;hsa-miR-452-5p;hsa-miR-592][hsa-miR-452-5p;hsa-miR-592;hsa-miR-668][hsa-miR-592;hsa-miR-668]
AMELY	1	[hsa-miR-636;hsa-miR-934]
AMFR	7	[hsa-miR-126-5p;hsa-miR-338-5p][hsa-miR-146a-5p;hsa-miR-29c-3p][hsa-miR-146a-5p;hsa-miR-338-5p;hsa-miR-582-5p][hsa-miR-146a-5p;hsa-miR-582-5p][hsa-miR-151a-3p;hsa-miR-19b-1-5p;hsa-miR-338-5p][hsa-miR-151a-3p;hsa-miR-320c;hsa-miR-338-5p][hsa-miR-151a-3p;hsa-miR-338-5p]
AMHR2	7	[hsa-miR-1301;hsa-miR-28-5p][hsa-miR-132-3p;hsa-miR-28-5p][hsa-miR-181a-5p;hsa-miR-28-5p][hsa-miR-181a-5p;hsa-miR-28-5p;hsa-miR-708-5p][hsa-miR-181b-5p;hsa-miR-212-3p;hsa-miR-28-5p][hsa-miR-28-5p;hsa-miR-3139;hsa-miR-708-5p][hsa-miR-28-5p;hsa-miR-708-5p]
AMIGO1	8	[hsa-miR-1275;hsa-miR-205-5p;hsa-miR-708-5p][hsa-miR-1275;hsa-miR-708-5p][hsa-miR-129-2-3p;hsa-miR-3130-5p;hsa-miR-708-5p][hsa-miR-205-5p;hsa-miR-3194-5p;hsa-miR-708-5p][hsa-miR-205-5p;hsa-miR-708-5p][hsa-miR-28-5p;hsa-miR-708-5p][hsa-miR-3130-5p;hsa-miR-708-5p][hsa-miR-3130-5p;hsa-miR-708-5p;hsa-miR-885-3p]
AMIGO2	5	[hsa-miR-106a-5p;hsa-miR-17-5p][hsa-miR-106a-5p;hsa-miR-17-5p;hsa-miR-370][hsa-miR-106a-5p;hsa-miR-17-5p;hsa-miR-93-5p][hsa-miR-106a-5p;hsa-miR-370;hsa-miR-93-5p][hsa-miR-106a-5p;hsa-miR-93-5p]
AMMECR1	7	[hsa-miR-1246;hsa-miR-323b-3p][hsa-miR-137;hsa-miR-196a-5p;hsa-miR-323b-3p][hsa-miR-137;hsa-miR-323b-3p][hsa-miR-196a-5p;hsa-miR-323b-3p][hsa-miR-196a-5p;hsa-miR-323b-3p;hsa-miR-410][hsa-miR-196a-5p;hsa-miR-338-5p;hsa-miR-876-3p][hsa-miR-338-5p;hsa-miR-876-3p]
AMMECR1L	5	[hsa-miR-148a-5p;hsa-miR-376c][hsa-miR-188-3p;hsa-miR-338-5p;hsa-miR-767-5p][hsa-miR-188-3p;hsa-miR-767-5p][hsa-miR-29c-3p;hsa-miR-522-3p][hsa-miR-3606;hsa-miR-452-5p]
AMN1	5	[hsa-miR-1271-5p;hsa-miR-182-5p][hsa-miR-1271-5p;hsa-miR-182-5p;hsa-miR-96-5p][hsa-miR-182-5p;hsa-miR-205-3p][hsa-miR-182-5p;hsa-miR-513b][hsa-miR-3140-3p;hsa-miR-3143]
AMOT	7	[hsa-miR-105-5p;hsa-miR-107][hsa-miR-105-5p;hsa-miR-107;hsa-miR-3164][hsa-miR-105-5p;hsa-miR-107;hsa-miR-497-5p][hsa-miR-106a-5p;hsa-miR-2278;hsa-miR-518b][hsa-miR-107;hsa-miR-338-3p][hsa-miR-203;hsa-miR-2278;hsa-miR-518b][hsa-miR-222-5p;hsa-miR-2278;hsa-miR-518b]
AMOTL1	6	[hsa-miR-143-3p;hsa-miR-15b-5p;hsa-miR-9-5p][hsa-miR-143-3p;hsa-miR-3143;hsa-miR-9-5p][hsa-miR-143-3p;hsa-miR-9-5p][hsa-miR-15b-5p;hsa-miR-9-5p][hsa-miR-374a-3p;hsa-miR-9-5p][hsa-miR-545-3p;hsa-miR-9-5p]
AMOTL2	7	[hsa-miR-107;hsa-miR-130b-3p][hsa-miR-1271-5p;hsa-miR-200b-3p;hsa-miR-30a-5p][hsa-miR-1271-5p;hsa-miR-30a-5p][hsa-miR-129-5p;hsa-miR-30e-3p;hsa-miR-96-5p][hsa-miR-130b-3p;hsa-miR-195-3p][hsa-miR-130b-3p;hsa-miR-30a-3p][hsa-miR-30e-3p;hsa-miR-96-5p]
AMPD2	5	[hsa-miR-200a-3p;hsa-miR-517a-3p;hsa-miR-9-5p][hsa-miR-200a-3p;hsa-miR-9-5p][hsa-miR-335-3p;hsa-miR-590-3p][hsa-miR-335-3p;hsa-miR-590-3p;hsa-miR-9-5p][hsa-miR-335-3p;hsa-miR-9-5p]
AMPD3	6	[hsa-miR-203;hsa-miR-3194-5p][hsa-miR-203;hsa-miR-3910][hsa-miR-203;hsa-miR-520h;hsa-miR-802][hsa-miR-203;hsa-miR-802][hsa-miR-3194-5p;hsa-miR-3609;hsa-miR-3923][hsa-miR-3609;hsa-miR-449b-3p;hsa-miR-506-3p]
AMPH	6	[hsa-miR-1278;hsa-miR-202-3p;hsa-miR-542-3p][hsa-miR-134;hsa-miR-20a-3p][hsa-miR-17-5p;hsa-miR-20a-3p;hsa-miR-592][hsa-miR-202-3p;hsa-miR-299-5p;hsa-miR-542-3p][hsa-miR-3125;hsa-miR-542-3p][hsa-miR-3652;hsa-miR-542-3p]
AMT	7	[hsa-let-7a-5p;hsa-let-7c;hsa-let-7d-5p][hsa-let-7c;hsa-let-7d-5p][hsa-let-7d-5p;hsa-let-7e-5p;hsa-miR-92a-1-5p][hsa-let-7d-5p;hsa-miR-450b-3p;hsa-miR-92a-1-5p][hsa-let-7d-5p;hsa-miR-769-3p;hsa-miR-92a-1-5p][hsa-let-7d-5p;hsa-miR-92a-1-5p][hsa-let-7d-5p;hsa-miR-92a-1-5p;hsa-miR-98]
ANAPC1	3	[hsa-miR-520d-5p;hsa-miR-524-5p;hsa-miR-548b-5p][hsa-miR-520d-5p;hsa-miR-548b-5p][hsa-miR-548a-5p;hsa-miR-548b-5p;hsa-miR-548y]
ANAPC11	2	[hsa-miR-1266;hsa-miR-433;hsa-miR-548t-5p][hsa-miR-548t-5p;hsa-miR-664-3p]
ANAPC16	5	[hsa-miR-130b-5p;hsa-miR-181b-5p][hsa-miR-181b-5p;hsa-miR-512-3p][hsa-miR-181b-5p;hsa-miR-579][hsa-miR-452-3p;hsa-miR-512-3p;hsa-miR-548y][hsa-miR-548b-5p;hsa-miR-548v]
ANAPC5	1	[hsa-miR-3065-5p;hsa-miR-3664-5p]
ANAPC7	6	[hsa-miR-1179;hsa-miR-1270;hsa-miR-3127-5p][hsa-miR-1270;hsa-miR-3127-5p][hsa-miR-1270;hsa-miR-3127-5p;hsa-miR-92b-5p][hsa-miR-148a-5p;hsa-miR-3139][hsa-miR-224-5p;hsa-miR-30c-1-3p][hsa-miR-224-5p;hsa-miR-30c-2-3p]
ANGEL1	7	[hsa-miR-125b-2-3p;hsa-miR-15a-5p;hsa-miR-195-5p][hsa-miR-125b-2-3p;hsa-miR-195-5p][hsa-miR-125b-2-3p;hsa-miR-195-5p;hsa-miR-516b-5p][hsa-miR-15b-5p;hsa-miR-2116-3p;hsa-miR-24-3p][hsa-miR-195-5p;hsa-miR-24-3p][hsa-miR-195-5p;hsa-miR-516b-5p][hsa-miR-195-5p;hsa-miR-7-5p]
ANGEL2	3	[hsa-miR-142-5p;hsa-miR-22-3p;hsa-miR-590-3p][hsa-miR-142-5p;hsa-miR-340-5p;hsa-miR-590-3p][hsa-miR-142-5p;hsa-miR-590-3p]
ANGPT1	8	[hsa-miR-135b-5p;hsa-miR-181a-5p][hsa-miR-135b-5p;hsa-miR-181a-5p;hsa-miR-3065-5p][hsa-miR-135b-5p;hsa-miR-181a-5p;hsa-miR-31-3p][hsa-miR-135b-5p;hsa-miR-181d;hsa-miR-31-3p][hsa-miR-135b-5p;hsa-miR-3065-5p][hsa-miR-135b-5p;hsa-miR-31-3p][hsa-miR-135b-5p;hsa-miR-31-3p;hsa-miR-340-5p][hsa-miR-135b-5p;hsa-miR-340-5p]
ANGPT2	5	[hsa-miR-105-5p;hsa-miR-135a-5p][hsa-miR-105-5p;hsa-miR-135b-5p;hsa-miR-145-5p][hsa-miR-135b-5p;hsa-miR-145-5p][hsa-miR-135b-5p;hsa-miR-335-3p;hsa-miR-876-5p][hsa-miR-224-5p;hsa-miR-335-3p]
ANGPTL1	7	[hsa-miR-182-5p;hsa-miR-411-3p;hsa-miR-590-3p][hsa-miR-190b;hsa-miR-590-3p;hsa-miR-592][hsa-miR-204-5p;hsa-miR-590-3p;hsa-miR-592][hsa-miR-204-5p;hsa-miR-708-3p][hsa-miR-3662;hsa-miR-590-3p;hsa-miR-592][hsa-miR-411-3p;hsa-miR-590-3p][hsa-miR-590-3p;hsa-miR-592]
ANGPTL2	6	[hsa-let-7d-5p;hsa-miR-25-3p;hsa-miR-381][hsa-miR-101-3p;hsa-miR-25-3p;hsa-miR-381][hsa-miR-148a-5p;hsa-miR-221-3p][hsa-miR-211-5p;hsa-miR-25-3p;hsa-miR-381][hsa-miR-221-5p;hsa-miR-25-3p;hsa-miR-381][hsa-miR-25-3p;hsa-miR-381]
ANGPTL3	1	[hsa-miR-3664-5p;hsa-miR-628-5p]
ANGPTL4	5	[hsa-miR-3140-3p;hsa-miR-3164][hsa-miR-3140-3p;hsa-miR-3164;hsa-miR-34a-5p][hsa-miR-3140-3p;hsa-miR-34a-5p;hsa-miR-377-5p][hsa-miR-3164;hsa-miR-377-5p][hsa-miR-34a-5p;hsa-miR-377-5p]
ANGPTL5	1	[hsa-miR-139-5p;hsa-miR-222-5p]
ANGPTL7	5	[hsa-miR-1270;hsa-miR-187-3p;hsa-miR-194-3p][hsa-miR-1270;hsa-miR-187-3p;hsa-miR-584-5p][hsa-miR-1270;hsa-miR-194-3p;hsa-miR-584-5p][hsa-miR-1270;hsa-miR-584-5p][hsa-miR-187-3p;hsa-miR-194-3p]
ANK1	4	[hsa-miR-1179;hsa-miR-28-5p][hsa-miR-153;hsa-miR-20a-3p][hsa-miR-153;hsa-miR-20a-3p;hsa-miR-9-5p][hsa-miR-28-5p;hsa-miR-7-5p]
ANK2	7	[hsa-miR-139-5p;hsa-miR-28-5p][hsa-miR-139-5p;hsa-miR-495][hsa-miR-141-3p;hsa-miR-17-5p;hsa-miR-199a-5p][hsa-miR-141-3p;hsa-miR-199a-5p][hsa-miR-142-3p;hsa-miR-33a-5p][hsa-miR-142-3p;hsa-miR-33a-5p;hsa-miR-3616-5p][hsa-miR-142-3p;hsa-miR-33a-5p;hsa-miR-488-5p]
ANK3	6	[hsa-miR-10b-5p;hsa-miR-1257][hsa-miR-148a-3p;hsa-miR-200b-3p;hsa-miR-27a-3p][hsa-miR-148a-3p;hsa-miR-27a-3p][hsa-miR-148a-3p;hsa-miR-92b-3p][hsa-miR-2113;hsa-miR-429][hsa-miR-363-3p;hsa-miR-466]
ANKDD1A	1	[hsa-miR-577;hsa-miR-590-3p]
ANKFN1	8	[hsa-miR-140-5p;hsa-miR-338-3p][hsa-miR-192-3p;hsa-miR-338-3p;hsa-miR-548b-5p][hsa-miR-328;hsa-miR-338-3p;hsa-miR-625-5p][hsa-miR-338-3p;hsa-miR-3607-5p;hsa-miR-625-5p][hsa-miR-338-3p;hsa-miR-3913-5p][hsa-miR-338-3p;hsa-miR-3913-5p;hsa-miR-758][hsa-miR-338-3p;hsa-miR-548b-5p][hsa-miR-338-3p;hsa-miR-625-5p]
ANKFY1	6	[hsa-let-7g-5p;hsa-miR-130a-5p;hsa-miR-30d-3p][hsa-miR-106b-5p;hsa-miR-141-3p][hsa-miR-106b-5p;hsa-miR-30a-3p][hsa-miR-1224-3p;hsa-miR-376c][hsa-miR-1224-3p;hsa-miR-590-5p][hsa-miR-130a-5p;hsa-miR-30d-3p]
ANKH	6	[hsa-miR-106b-5p;hsa-miR-200c-3p][hsa-miR-106b-5p;hsa-miR-200c-3p;hsa-miR-32-3p][hsa-miR-200c-3p;hsa-miR-3146;hsa-miR-32-3p][hsa-miR-200c-3p;hsa-miR-320d][hsa-miR-217;hsa-miR-320d;hsa-miR-9-3p][hsa-miR-217;hsa-miR-9-3p]
ANKHD1	7	[hsa-miR-221-3p;hsa-miR-30d-5p][hsa-miR-221-3p;hsa-miR-30d-5p;hsa-miR-323a-3p][hsa-miR-221-3p;hsa-miR-374c-5p][hsa-miR-26a-1-3p;hsa-miR-590-5p][hsa-miR-26a-2-3p;hsa-miR-29b-1-5p;hsa-miR-590-5p][hsa-miR-26a-2-3p;hsa-miR-539-5p;hsa-miR-590-5p][hsa-miR-26a-2-3p;hsa-miR-590-5p]
ANKHD1-EIF4EBP3	6	[hsa-miR-140-3p;hsa-miR-18a-3p;hsa-miR-452-3p][hsa-miR-182-5p;hsa-miR-607][hsa-miR-18a-3p;hsa-miR-452-3p][hsa-miR-18a-3p;hsa-miR-452-3p;hsa-miR-96-5p][hsa-miR-374b-3p;hsa-miR-483-3p][hsa-miR-374b-3p;hsa-miR-483-3p;hsa-miR-96-5p]
ANKIB1	6	[hsa-miR-106b-3p;hsa-miR-3161][hsa-miR-16-5p;hsa-miR-3609][hsa-miR-25-3p;hsa-miR-28-3p][hsa-miR-25-3p;hsa-miR-28-3p;hsa-miR-323b-3p][hsa-miR-26a-5p;hsa-miR-28-3p;hsa-miR-501-5p][hsa-miR-28-3p;hsa-miR-501-5p]
ANKLE1	1	[hsa-miR-2355-5p;hsa-miR-629-3p]
ANKLE2	2	[hsa-miR-2115-3p;hsa-miR-2276;hsa-miR-3942-5p][hsa-miR-2276;hsa-miR-3942-5p]
ANKMY1	1	[hsa-miR-18a-5p;hsa-miR-24-3p]
ANKMY2	1	[hsa-miR-509-3-5p;hsa-miR-516b-5p;hsa-miR-532-5p]
ANKRA2	5	[hsa-let-7c;hsa-miR-340-5p][hsa-let-7c;hsa-miR-340-5p;hsa-miR-92b-3p][hsa-let-7e-5p;hsa-miR-500a-3p][hsa-miR-30a-5p;hsa-miR-500a-3p][hsa-miR-30b-5p;hsa-miR-500a-3p]
ANKRD1	6	[hsa-let-7f-1-3p;hsa-miR-146a-3p][hsa-let-7f-1-3p;hsa-miR-146a-3p;hsa-miR-493-5p][hsa-let-7f-1-3p;hsa-miR-28-3p;hsa-miR-582-5p][hsa-miR-222-5p;hsa-miR-28-3p][hsa-miR-222-5p;hsa-miR-28-3p;hsa-miR-493-5p][hsa-miR-28-3p;hsa-miR-493-5p]
ANKRD10	5	[hsa-miR-1283;hsa-miR-449a][hsa-miR-1283;hsa-miR-449a;hsa-miR-556-3p][hsa-miR-449b-5p;hsa-miR-548a-5p][hsa-miR-449b-5p;hsa-miR-548a-5p;hsa-miR-664-3p][hsa-miR-548y;hsa-miR-551b-5p]
ANKRD11	7	[hsa-miR-1245a;hsa-miR-17-5p][hsa-miR-1245a;hsa-miR-31-5p;hsa-miR-365a-3p][hsa-miR-143-5p;hsa-miR-20b-3p][hsa-miR-31-5p;hsa-miR-365a-3p][hsa-miR-31-5p;hsa-miR-365a-3p;hsa-miR-497-3p][hsa-miR-365a-3p;hsa-miR-520a-3p;hsa-miR-573][hsa-miR-365a-3p;hsa-miR-573]
ANKRD12	7	[hsa-miR-186-5p;hsa-miR-19a-3p;hsa-miR-374b-5p][hsa-miR-186-5p;hsa-miR-223-5p;hsa-miR-374b-5p][hsa-miR-186-5p;hsa-miR-27b-3p;hsa-miR-374b-5p][hsa-miR-186-5p;hsa-miR-374b-5p][hsa-miR-188-5p;hsa-miR-195-3p][hsa-miR-27b-3p;hsa-miR-301b][hsa-miR-301b;hsa-miR-3926]
ANKRD13A	6	[hsa-miR-10a-5p;hsa-miR-204-5p][hsa-miR-1234;hsa-miR-204-5p][hsa-miR-193a-3p;hsa-miR-204-5p;hsa-miR-519a-5p][hsa-miR-204-5p;hsa-miR-519a-5p][hsa-miR-204-5p;hsa-miR-9-3p][hsa-miR-488-5p;hsa-miR-618]
ANKRD13B	7	[hsa-miR-1271-5p;hsa-miR-504][hsa-miR-15a-5p;hsa-miR-29a-3p][hsa-miR-15b-5p;hsa-miR-449a;hsa-miR-504][hsa-miR-222-5p;hsa-miR-449a;hsa-miR-504][hsa-miR-3605-5p;hsa-miR-504][hsa-miR-449a;hsa-miR-497-3p;hsa-miR-504][hsa-miR-449a;hsa-miR-504]
ANKRD13C	4	[hsa-miR-181b-5p;hsa-miR-204-5p;hsa-miR-3200-3p][hsa-miR-203;hsa-miR-492;hsa-miR-548e][hsa-miR-204-5p;hsa-miR-29a-3p;hsa-miR-3200-3p][hsa-miR-204-5p;hsa-miR-3200-3p]
ANKRD16	7	[hsa-miR-1270;hsa-miR-409-3p;hsa-miR-519a-5p][hsa-miR-141-5p;hsa-miR-326;hsa-miR-519a-5p][hsa-miR-141-5p;hsa-miR-519a-5p;hsa-miR-9-5p][hsa-miR-191-3p;hsa-miR-3916][hsa-miR-25-3p;hsa-miR-409-3p;hsa-miR-519a-5p][hsa-miR-320e;hsa-miR-519a-5p][hsa-miR-409-3p;hsa-miR-519a-5p]
ANKRD17	6	[hsa-miR-187-5p;hsa-miR-221-3p;hsa-miR-3161][hsa-miR-221-3p;hsa-miR-3161][hsa-miR-221-3p;hsa-miR-548v][hsa-miR-3161;hsa-miR-323b-3p;hsa-miR-93-5p][hsa-miR-3161;hsa-miR-424-3p][hsa-miR-3161;hsa-miR-93-5p]
ANKRD20A3	1	[hsa-miR-144-3p;hsa-miR-556-5p]
ANKRD22	1	[hsa-miR-3120-3p;hsa-miR-452-3p]
ANKRD27	7	[hsa-miR-1227;hsa-miR-455-5p][hsa-miR-15b-3p;hsa-miR-182-5p][hsa-miR-182-5p;hsa-miR-218-5p][hsa-miR-182-5p;hsa-miR-218-5p;hsa-miR-501-3p][hsa-miR-182-5p;hsa-miR-218-5p;hsa-miR-506-3p][hsa-miR-182-5p;hsa-miR-502-3p][hsa-miR-3661;hsa-miR-500a-3p]
ANKRD28	8	[hsa-let-7e-5p;hsa-miR-429][hsa-miR-106b-5p;hsa-miR-20a-5p;hsa-miR-29b-1-5p][hsa-miR-1305;hsa-miR-30a-3p;hsa-miR-429][hsa-miR-20a-5p;hsa-miR-29b-1-5p][hsa-miR-20a-5p;hsa-miR-32-5p][hsa-miR-221-5p;hsa-miR-30a-3p;hsa-miR-429][hsa-miR-30a-3p;hsa-miR-363-3p;hsa-miR-429][hsa-miR-30a-3p;hsa-miR-429]
ANKRD29	2	[hsa-miR-106a-5p;hsa-miR-106b-5p;hsa-miR-93-5p][hsa-miR-106b-5p;hsa-miR-93-5p]
ANKRD34A	7	[hsa-miR-1205;hsa-miR-124-5p][hsa-miR-124-5p;hsa-miR-15b-5p][hsa-miR-124-5p;hsa-miR-3681-5p][hsa-miR-124-5p;hsa-miR-375][hsa-miR-124-5p;hsa-miR-375;hsa-miR-491-5p][hsa-miR-124-5p;hsa-miR-491-5p;hsa-miR-580][hsa-miR-3913-5p;hsa-miR-424-5p]
ANKRD34B	6	[hsa-miR-1291;hsa-miR-18b-3p][hsa-miR-1291;hsa-miR-18b-3p;hsa-miR-27a-3p][hsa-miR-1291;hsa-miR-18b-3p;hsa-miR-3074-3p][hsa-miR-146a-3p;hsa-miR-18b-3p;hsa-miR-27a-3p][hsa-miR-18b-3p;hsa-miR-27a-3p][hsa-miR-18b-3p;hsa-miR-3074-3p]
ANKRD34C	2	[hsa-miR-324-5p;hsa-miR-3622a-3p;hsa-miR-488-3p][hsa-miR-3622a-3p;hsa-miR-488-3p;hsa-miR-589-5p]
ANKRD36B	1	[hsa-miR-27a-3p;hsa-miR-592]
ANKRD37	5	[hsa-miR-1248;hsa-miR-2116-5p;hsa-miR-7-5p][hsa-miR-1248;hsa-miR-412][hsa-miR-1248;hsa-miR-412;hsa-miR-7-5p][hsa-miR-1248;hsa-miR-7-5p][hsa-miR-1277-3p;hsa-miR-2116-5p;hsa-miR-7-5p]
ANKRD40	8	[hsa-miR-128;hsa-miR-224-5p;hsa-miR-9-5p][hsa-miR-135b-5p;hsa-miR-212-3p;hsa-miR-224-5p][hsa-miR-135b-5p;hsa-miR-218-5p;hsa-miR-224-5p][hsa-miR-135b-5p;hsa-miR-224-5p][hsa-miR-135b-5p;hsa-miR-224-5p;hsa-miR-892a][hsa-miR-135b-5p;hsa-miR-224-5p;hsa-miR-9-5p][hsa-miR-153;hsa-miR-224-5p;hsa-miR-9-5p][hsa-miR-224-5p;hsa-miR-889;hsa-miR-9-5p]
ANKRD42	6	[hsa-miR-125a-5p;hsa-miR-125b-5p;hsa-miR-219-1-3p][hsa-miR-125a-5p;hsa-miR-145-5p;hsa-miR-449b-3p][hsa-miR-125a-5p;hsa-miR-449b-3p][hsa-miR-125b-5p;hsa-miR-219-1-3p][hsa-miR-199a-5p;hsa-miR-449b-3p][hsa-miR-219-1-3p;hsa-miR-449b-3p]
ANKRD44	6	[hsa-miR-101-3p;hsa-miR-33a-5p][hsa-miR-200b-5p;hsa-miR-222-5p][hsa-miR-222-5p;hsa-miR-301a-3p][hsa-miR-222-5p;hsa-miR-301a-3p;hsa-miR-96-5p][hsa-miR-33a-5p;hsa-miR-664-3p][hsa-miR-543;hsa-miR-582-5p]
ANKRD45	5	[hsa-miR-30b-3p;hsa-miR-516a-5p;hsa-miR-577][hsa-miR-30b-3p;hsa-miR-577][hsa-miR-516a-5p;hsa-miR-518c-5p;hsa-miR-577][hsa-miR-516a-5p;hsa-miR-577][hsa-miR-518c-5p;hsa-miR-577]
ANKRD46	7	[hsa-let-7a-5p;hsa-miR-7-1-3p;hsa-miR-98][hsa-let-7c;hsa-let-7g-5p;hsa-miR-7-1-3p][hsa-let-7d-5p;hsa-miR-7-1-3p;hsa-miR-98][hsa-let-7e-5p;hsa-miR-195-5p][hsa-let-7g-5p;hsa-miR-7-1-3p][hsa-let-7g-5p;hsa-miR-7-1-3p;hsa-miR-7-2-3p][hsa-miR-7-1-3p;hsa-miR-98]
ANKRD49	6	[hsa-let-7d-5p;hsa-miR-224-5p;hsa-miR-29c-3p][hsa-let-7i-5p;hsa-miR-29c-3p][hsa-miR-224-5p;hsa-miR-29a-3p;hsa-miR-29c-3p][hsa-miR-224-5p;hsa-miR-29b-3p;hsa-miR-29c-3p][hsa-miR-224-5p;hsa-miR-29c-3p][hsa-miR-29b-3p;hsa-miR-29c-3p]
ANKRD50	6	[hsa-miR-125a-5p;hsa-miR-183-5p][hsa-miR-139-5p;hsa-miR-26a-5p][hsa-miR-148a-3p;hsa-miR-18a-5p][hsa-miR-188-5p;hsa-miR-1914-5p;hsa-miR-548f][hsa-miR-188-5p;hsa-miR-548f][hsa-miR-188-5p;hsa-miR-766-3p]
ANKRD52	6	[hsa-let-7i-5p;hsa-miR-18b-5p][hsa-miR-1252;hsa-miR-18b-5p][hsa-miR-130a-3p;hsa-miR-18b-5p][hsa-miR-130a-3p;hsa-miR-18b-5p;hsa-miR-671-5p][hsa-miR-18b-5p;hsa-miR-3065-3p][hsa-miR-29c-3p;hsa-miR-449b-5p]
ANKRD53	1	[hsa-miR-205-5p;hsa-miR-592]
ANKRD54	1	[hsa-miR-184;hsa-miR-93-3p]
ANKRD55	5	[hsa-miR-135a-5p;hsa-miR-135b-5p][hsa-miR-135a-5p;hsa-miR-135b-5p;hsa-miR-545-3p][hsa-miR-135a-5p;hsa-miR-372][hsa-miR-135a-5p;hsa-miR-372;hsa-miR-545-3p][hsa-miR-135a-5p;hsa-miR-545-3p]
ANKRD6	4	[hsa-miR-1285-3p;hsa-miR-214-3p;hsa-miR-29b-2-5p][hsa-miR-214-3p;hsa-miR-29b-1-5p;hsa-miR-29b-2-5p][hsa-miR-214-3p;hsa-miR-3128][hsa-miR-214-3p;hsa-miR-3128;hsa-miR-331-3p]
ANKRD65	1	[hsa-miR-1284;hsa-miR-9-5p]
ANKRD7	2	[hsa-miR-141-5p;hsa-miR-23b-5p;hsa-miR-655][hsa-miR-141-5p;hsa-miR-655]
ANKRD9	7	[hsa-miR-106a-5p;hsa-miR-142-5p][hsa-miR-106a-5p;hsa-miR-142-5p;hsa-miR-3609][hsa-miR-106a-5p;hsa-miR-146a-3p;hsa-miR-17-5p][hsa-miR-106b-5p;hsa-miR-142-5p][hsa-miR-106b-5p;hsa-miR-146a-3p;hsa-miR-17-5p][hsa-miR-146a-3p;hsa-miR-17-5p][hsa-miR-146a-3p;hsa-miR-17-5p;hsa-miR-93-5p]
ANKS1A	6	[hsa-miR-10a-5p;hsa-miR-9-3p][hsa-miR-192-5p;hsa-miR-3065-5p;hsa-miR-9-3p][hsa-miR-215;hsa-miR-9-3p][hsa-miR-224-5p;hsa-miR-3065-5p][hsa-miR-224-5p;hsa-miR-455-3p][hsa-miR-3065-5p;hsa-miR-9-3p]
ANKS1B	7	[hsa-miR-141-3p;hsa-miR-22-5p;hsa-miR-452-5p][hsa-miR-154-3p;hsa-miR-200a-3p;hsa-miR-22-5p][hsa-miR-200a-3p;hsa-miR-22-5p][hsa-miR-22-5p;hsa-miR-221-5p;hsa-miR-452-5p][hsa-miR-22-5p;hsa-miR-338-5p;hsa-miR-452-5p][hsa-miR-22-5p;hsa-miR-452-5p][hsa-miR-584-5p;hsa-miR-616-5p]
ANKS3	1	[hsa-miR-221-5p;hsa-miR-363-5p]
ANKS4B	1	[hsa-miR-1270;hsa-miR-3613-3p]
ANKZF1	6	[hsa-miR-101-3p;hsa-miR-520a-5p;hsa-miR-758][hsa-miR-101-3p;hsa-miR-618;hsa-miR-758][hsa-miR-101-3p;hsa-miR-758][hsa-miR-192-3p;hsa-miR-525-5p;hsa-miR-874][hsa-miR-192-3p;hsa-miR-874][hsa-miR-758;hsa-miR-874]
ANLN	5	[hsa-miR-182-5p;hsa-miR-18a-5p][hsa-miR-18b-5p;hsa-miR-548l][hsa-miR-200c-3p;hsa-miR-548l][hsa-miR-200c-3p;hsa-miR-548l;hsa-miR-93-5p][hsa-miR-767-5p;hsa-miR-9-5p]
ANO1	5	[hsa-let-7d-3p;hsa-miR-10a-3p][hsa-miR-10a-3p;hsa-miR-16-1-3p;hsa-miR-381][hsa-miR-10a-3p;hsa-miR-29b-2-5p][hsa-miR-10a-3p;hsa-miR-338-5p;hsa-miR-381][hsa-miR-10a-3p;hsa-miR-381]
ANO3	7	[hsa-miR-1179;hsa-miR-153;hsa-miR-195-5p][hsa-miR-153;hsa-miR-195-5p][hsa-miR-153;hsa-miR-195-5p;hsa-miR-497-5p][hsa-miR-153;hsa-miR-195-5p;hsa-miR-539-5p][hsa-miR-195-5p;hsa-miR-222-5p;hsa-miR-539-5p][hsa-miR-195-5p;hsa-miR-29b-2-5p][hsa-miR-424-5p;hsa-miR-664-3p]
ANO4	4	[hsa-miR-1179;hsa-miR-135a-5p;hsa-miR-210][hsa-miR-1179;hsa-miR-135a-5p;hsa-miR-411-3p][hsa-miR-1179;hsa-miR-210][hsa-miR-1179;hsa-miR-374b-5p]
ANO5	5	[hsa-miR-1229;hsa-miR-124-3p][hsa-miR-1229;hsa-miR-124-3p;hsa-miR-548t-5p][hsa-miR-124-3p;hsa-miR-202-3p;hsa-miR-506-3p][hsa-miR-124-3p;hsa-miR-421;hsa-miR-506-3p][hsa-miR-124-3p;hsa-miR-548t-5p]
ANO6	6	[hsa-miR-105-5p;hsa-miR-106b-5p;hsa-miR-520a-3p][hsa-miR-106a-5p;hsa-miR-106b-5p;hsa-miR-125b-5p][hsa-miR-106a-5p;hsa-miR-20b-5p][hsa-miR-106b-5p;hsa-miR-125b-5p][hsa-miR-125a-5p;hsa-miR-20b-5p][hsa-miR-20b-5p;hsa-miR-93-5p]
ANO8	5	[hsa-miR-1270;hsa-miR-19b-1-5p;hsa-miR-203][hsa-miR-1270;hsa-miR-19b-2-5p;hsa-miR-203][hsa-miR-1270;hsa-miR-203][hsa-miR-19b-1-5p;hsa-miR-7-1-3p][hsa-miR-425-5p;hsa-miR-548d-3p]
ANP32A	5	[hsa-miR-149-5p;hsa-miR-181c-5p;hsa-miR-493-5p][hsa-miR-149-5p;hsa-miR-335-3p][hsa-miR-149-5p;hsa-miR-493-5p][hsa-miR-188-3p;hsa-miR-93-3p][hsa-miR-494;hsa-miR-552]
ANP32B	8	[hsa-let-7g-3p;hsa-miR-106a-5p][hsa-let-7g-3p;hsa-miR-106a-5p;hsa-miR-26a-1-3p][hsa-miR-106a-5p;hsa-miR-1910][hsa-miR-106a-5p;hsa-miR-3910][hsa-miR-106a-5p;hsa-miR-520d-5p][hsa-miR-19b-1-5p;hsa-miR-429;hsa-miR-455-3p][hsa-miR-19b-1-5p;hsa-miR-455-3p][hsa-miR-19b-1-5p;hsa-miR-455-3p;hsa-miR-548d-3p]
ANP32E	7	[hsa-miR-1283;hsa-miR-18a-3p][hsa-miR-135b-5p;hsa-miR-502-3p][hsa-miR-18a-3p;hsa-miR-363-3p][hsa-miR-18a-5p;hsa-miR-200a-3p;hsa-miR-802][hsa-miR-18a-5p;hsa-miR-20b-3p][hsa-miR-18a-5p;hsa-miR-548t-5p][hsa-miR-18a-5p;hsa-miR-802]
ANPEP	5	[hsa-let-7f-2-3p;hsa-miR-125b-5p;hsa-miR-181a-3p][hsa-let-7f-2-3p;hsa-miR-125b-5p;hsa-miR-501-5p][hsa-miR-125a-5p;hsa-miR-125b-5p;hsa-miR-501-5p][hsa-miR-125b-5p;hsa-miR-500a-5p;hsa-miR-501-5p][hsa-miR-125b-5p;hsa-miR-501-5p]
ANTXR1	6	[hsa-let-7a-2-3p;hsa-miR-106b-5p;hsa-miR-23b-3p][hsa-miR-106b-5p;hsa-miR-1976;hsa-miR-23b-3p][hsa-miR-106b-5p;hsa-miR-23b-3p][hsa-miR-106b-5p;hsa-miR-23b-3p;hsa-miR-3926][hsa-miR-106b-5p;hsa-miR-379-5p][hsa-miR-106b-5p;hsa-miR-379-5p;hsa-miR-518f-5p]
ANTXR2	4	[hsa-miR-1258;hsa-miR-152;hsa-miR-96-5p][hsa-miR-1258;hsa-miR-96-5p][hsa-miR-125a-5p;hsa-miR-940;hsa-miR-96-5p][hsa-miR-940;hsa-miR-96-5p]
ANXA11	8	[hsa-miR-1271-5p;hsa-miR-182-5p;hsa-miR-96-5p][hsa-miR-1271-5p;hsa-miR-34a-5p;hsa-miR-96-5p][hsa-miR-1271-5p;hsa-miR-449b-5p;hsa-miR-96-5p][hsa-miR-1271-5p;hsa-miR-802;hsa-miR-96-5p][hsa-miR-1271-5p;hsa-miR-96-5p][hsa-miR-34a-5p;hsa-miR-449a][hsa-miR-449a;hsa-miR-506-3p;hsa-miR-96-5p][hsa-miR-506-3p;hsa-miR-96-5p]
ANXA13	1	[hsa-miR-105-5p;hsa-miR-22-3p]
ANXA2	6	[hsa-miR-101-3p;hsa-miR-425-5p;hsa-miR-548a-5p][hsa-miR-101-3p;hsa-miR-425-5p;hsa-miR-548j][hsa-miR-101-3p;hsa-miR-425-5p;hsa-miR-9-5p][hsa-miR-101-3p;hsa-miR-452-3p][hsa-miR-101-3p;hsa-miR-548b-5p][hsa-miR-101-3p;hsa-miR-584-5p]
ANXA4	5	[hsa-miR-1;hsa-miR-3662;hsa-miR-9-3p][hsa-miR-203;hsa-miR-3662][hsa-miR-203;hsa-miR-3662;hsa-miR-9-3p][hsa-miR-3662;hsa-miR-374c-5p;hsa-miR-580][hsa-miR-374c-5p;hsa-miR-580]
ANXA7	5	[hsa-miR-10a-5p;hsa-miR-146a-3p;hsa-miR-19a-3p][hsa-miR-10a-5p;hsa-miR-19a-3p][hsa-miR-10a-5p;hsa-miR-19a-3p;hsa-miR-19b-3p][hsa-miR-135b-5p;hsa-miR-506-3p][hsa-miR-506-3p;hsa-miR-657]
AP1AR	7	[hsa-let-7a-3p;hsa-miR-100-5p;hsa-miR-590-5p][hsa-let-7b-3p;hsa-miR-192-3p;hsa-miR-99b-5p][hsa-let-7b-3p;hsa-miR-99b-5p][hsa-miR-100-5p;hsa-miR-590-5p][hsa-miR-181a-5p;hsa-miR-187-5p;hsa-miR-590-5p][hsa-miR-187-5p;hsa-miR-590-5p][hsa-miR-381;hsa-miR-590-5p;hsa-miR-9-3p]
AP1B1	7	[hsa-miR-126-5p;hsa-miR-30c-5p][hsa-miR-30b-5p;hsa-miR-30e-5p][hsa-miR-30c-5p;hsa-miR-30e-5p][hsa-miR-30c-5p;hsa-miR-30e-5p;hsa-miR-338-5p][hsa-miR-30c-5p;hsa-miR-30e-5p;hsa-miR-556-3p][hsa-miR-30c-5p;hsa-miR-338-5p][hsa-miR-30c-5p;hsa-miR-556-3p]
AP1G1	5	[hsa-miR-1;hsa-miR-1910][hsa-miR-1;hsa-miR-1910;hsa-miR-30d-3p][hsa-miR-21-3p;hsa-miR-501-5p;hsa-miR-7-1-3p][hsa-miR-222-5p;hsa-miR-501-5p;hsa-miR-7-1-3p][hsa-miR-501-5p;hsa-miR-519c-3p;hsa-miR-7-1-3p]
AP1G2	1	[hsa-miR-138-5p;hsa-miR-370]
AP1M2	1	[hsa-miR-3163;hsa-miR-518b]
AP1S1	6	[hsa-let-7d-5p;hsa-let-7f-5p][hsa-let-7e-5p;hsa-miR-106b-5p;hsa-miR-27a-3p][hsa-miR-106b-5p;hsa-miR-17-5p][hsa-miR-106b-5p;hsa-miR-17-5p;hsa-miR-27a-3p][hsa-miR-106b-5p;hsa-miR-27a-3p][hsa-miR-106b-5p;hsa-miR-31-5p]
AP1S2	8	[hsa-miR-200a-5p;hsa-miR-200b-3p;hsa-miR-203][hsa-miR-200a-5p;hsa-miR-200b-3p;hsa-miR-887][hsa-miR-200b-3p;hsa-miR-200c-3p;hsa-miR-3065-5p][hsa-miR-200b-3p;hsa-miR-203][hsa-miR-200b-3p;hsa-miR-211-5p][hsa-miR-200b-3p;hsa-miR-3065-5p][hsa-miR-200b-3p;hsa-miR-3065-5p;hsa-miR-887][hsa-miR-200b-3p;hsa-miR-887]
AP1S3	6	[hsa-miR-105-5p;hsa-miR-195-5p][hsa-miR-105-5p;hsa-miR-195-5p;hsa-miR-655][hsa-miR-105-5p;hsa-miR-374c-5p;hsa-miR-497-5p][hsa-miR-105-5p;hsa-miR-655][hsa-miR-374c-5p;hsa-miR-497-5p][hsa-miR-374c-5p;hsa-miR-497-5p;hsa-miR-655]
AP2A1	7	[hsa-miR-149-3p;hsa-miR-16-5p][hsa-miR-149-3p;hsa-miR-16-5p;hsa-miR-424-5p][hsa-miR-149-3p;hsa-miR-16-5p;hsa-miR-497-5p][hsa-miR-149-3p;hsa-miR-16-5p;hsa-miR-655][hsa-miR-149-3p;hsa-miR-497-5p][hsa-miR-15b-5p;hsa-miR-30a-5p;hsa-miR-30b-5p][hsa-miR-30a-5p;hsa-miR-30b-5p]
AP2B1	7	[hsa-miR-124-5p;hsa-miR-500a-3p][hsa-miR-1305;hsa-miR-500a-3p][hsa-miR-17-5p;hsa-miR-500a-3p;hsa-miR-519a-3p][hsa-miR-203;hsa-miR-31-5p;hsa-miR-449b-3p][hsa-miR-203;hsa-miR-31-5p;hsa-miR-624-3p][hsa-miR-203;hsa-miR-31-5p;hsa-miR-889][hsa-miR-500a-3p;hsa-miR-519a-3p]
AP2M1	6	[hsa-miR-135b-5p;hsa-miR-9-5p][hsa-miR-28-5p;hsa-miR-3150b-3p][hsa-miR-28-5p;hsa-miR-3150b-3p;hsa-miR-588][hsa-miR-28-5p;hsa-miR-885-5p][hsa-miR-3176;hsa-miR-423-5p][hsa-miR-423-5p;hsa-miR-582-3p]
AP3B1	6	[hsa-miR-129-5p;hsa-miR-362-3p;hsa-miR-3919][hsa-miR-129-5p;hsa-miR-505-5p][hsa-miR-153;hsa-miR-362-3p;hsa-miR-3681-5p][hsa-miR-362-3p;hsa-miR-3681-5p][hsa-miR-362-3p;hsa-miR-3919][hsa-miR-505-5p;hsa-miR-584-5p]
AP3D1	7	[hsa-miR-190b;hsa-miR-20a-5p][hsa-miR-190b;hsa-miR-3607-3p][hsa-miR-190b;hsa-miR-3607-3p;hsa-miR-424-5p][hsa-miR-1;hsa-miR-190b;hsa-miR-20a-5p][hsa-miR-20a-5p;hsa-miR-542-3p][hsa-miR-20b-5p;hsa-miR-542-3p][hsa-miR-497-5p;hsa-miR-542-3p]
AP3M1	4	[hsa-miR-222-3p;hsa-miR-548v;hsa-miR-579][hsa-miR-30c-5p;hsa-miR-452-3p][hsa-miR-3910;hsa-miR-506-3p][hsa-miR-452-3p;hsa-miR-506-3p]
AP3S1	7	[hsa-miR-18a-5p;hsa-miR-30a-5p;hsa-miR-425-3p][hsa-miR-18a-5p;hsa-miR-30a-5p;hsa-miR-548k][hsa-miR-18a-5p;hsa-miR-323b-3p][hsa-miR-18a-5p;hsa-miR-485-3p][hsa-miR-18a-5p;hsa-miR-485-3p;hsa-miR-548j][hsa-miR-21-3p;hsa-miR-2355-5p][hsa-miR-21-3p;hsa-miR-2355-5p;hsa-miR-335-5p]
AP4E1	3	[hsa-miR-105-5p;hsa-miR-3065-3p][hsa-miR-105-5p;hsa-miR-3065-3p;hsa-miR-411-3p][hsa-miR-33a-5p;hsa-miR-455-3p]
AP4M1	3	[hsa-let-7g-3p;hsa-miR-140-3p;hsa-miR-548t-5p][hsa-miR-140-3p;hsa-miR-548t-5p][hsa-miR-148a-5p;hsa-miR-548t-5p]
AP4S1	6	[hsa-miR-106a-5p;hsa-miR-106b-5p;hsa-miR-3650][hsa-miR-106a-5p;hsa-miR-20a-5p;hsa-miR-3650][hsa-miR-106a-5p;hsa-miR-20a-5p;hsa-miR-93-5p][hsa-miR-106a-5p;hsa-miR-324-3p;hsa-miR-3650][hsa-miR-106a-5p;hsa-miR-3650][hsa-miR-106a-5p;hsa-miR-521]
AP5M1	2	[hsa-miR-329;hsa-miR-362-3p][hsa-miR-362-3p;hsa-miR-491-3p]
APAF1	8	[hsa-miR-130a-5p;hsa-miR-19a-5p;hsa-miR-27a-3p][hsa-miR-130a-5p;hsa-miR-27a-3p][hsa-miR-130a-5p;hsa-miR-27a-3p;hsa-miR-579][hsa-miR-19a-5p;hsa-miR-27a-3p][hsa-miR-19a-5p;hsa-miR-27a-3p;hsa-miR-27b-3p][hsa-miR-19a-5p;hsa-miR-27a-3p;hsa-miR-410][hsa-miR-23a-3p;hsa-miR-3682-3p;hsa-miR-410][hsa-miR-3682-3p;hsa-miR-410]
APBA1	6	[hsa-let-7a-3p;hsa-let-7f-5p;hsa-let-7i-5p][hsa-let-7a-3p;hsa-let-7i-5p][hsa-let-7a-3p;hsa-let-7i-5p;hsa-miR-181c-5p][hsa-let-7f-1-3p;hsa-let-7i-5p][hsa-let-7f-1-3p;hsa-let-7i-5p;hsa-miR-374b-5p][hsa-let-7i-5p;hsa-miR-181c-5p]
APBA2	5	[hsa-miR-152;hsa-miR-224-5p][hsa-miR-152;hsa-miR-499a-5p][hsa-miR-20a-3p;hsa-miR-592;hsa-miR-9-3p][hsa-miR-20a-3p;hsa-miR-9-3p][hsa-miR-224-5p;hsa-miR-9-3p]
APBB1	7	[hsa-miR-130a-3p;hsa-miR-199b-5p;hsa-miR-7-5p][hsa-miR-130b-3p;hsa-miR-147b;hsa-miR-148a-3p][hsa-miR-130b-3p;hsa-miR-148a-3p][hsa-miR-130b-3p;hsa-miR-148a-3p;hsa-miR-3922-3p][hsa-miR-130b-3p;hsa-miR-148b-3p;hsa-miR-508-5p][hsa-miR-130b-3p;hsa-miR-508-5p][hsa-miR-148a-3p;hsa-miR-199b-5p;hsa-miR-7-5p]
APBB2	7	[hsa-miR-1251;hsa-miR-141-3p][hsa-miR-1251;hsa-miR-3678-5p][hsa-miR-362-3p;hsa-miR-452-3p;hsa-miR-548t-5p][hsa-miR-369-3p;hsa-miR-942][hsa-miR-452-3p;hsa-miR-505-3p][hsa-miR-452-3p;hsa-miR-548t-5p][hsa-miR-577;hsa-miR-942]
APBB3	5	[hsa-let-7c;hsa-let-7e-5p;hsa-miR-224-5p][hsa-let-7c;hsa-miR-142-5p;hsa-miR-224-5p][hsa-let-7c;hsa-miR-224-5p;hsa-miR-450a-5p][hsa-miR-224-5p;hsa-miR-382-5p;hsa-miR-93-5p][hsa-miR-224-5p;hsa-miR-93-5p]
APC	6	[hsa-miR-135b-5p;hsa-miR-153][hsa-miR-135b-5p;hsa-miR-153;hsa-miR-194-5p][hsa-miR-135b-5p;hsa-miR-153;hsa-miR-33a-3p][hsa-miR-135b-5p;hsa-miR-32-3p;hsa-miR-374b-5p][hsa-miR-135b-5p;hsa-miR-374b-5p;hsa-miR-589-3p][hsa-miR-27a-3p;hsa-miR-425-3p]
APCDD1	6	[hsa-miR-130a-3p;hsa-miR-154-5p][hsa-miR-17-5p;hsa-miR-20a-5p;hsa-miR-26b-5p][hsa-miR-17-5p;hsa-miR-20a-5p;hsa-miR-3609][hsa-miR-200c-5p;hsa-miR-20a-5p][hsa-miR-20a-5p;hsa-miR-20b-5p;hsa-miR-301a-3p][hsa-miR-20a-5p;hsa-miR-301a-3p]
APH1A	6	[hsa-miR-1283;hsa-miR-138-5p;hsa-miR-2355-5p][hsa-miR-1283;hsa-miR-182-5p][hsa-miR-1283;hsa-miR-2355-5p][hsa-miR-1283;hsa-miR-2355-5p;hsa-miR-320d][hsa-miR-1283;hsa-miR-2355-5p;hsa-miR-922][hsa-miR-365a-3p;hsa-miR-501-5p]
APH1B	3	[hsa-miR-129-1-3p;hsa-miR-129-2-3p;hsa-miR-33a-5p][hsa-miR-129-1-3p;hsa-miR-33a-5p][hsa-miR-30a-3p;hsa-miR-33a-5p]
API5	9	[hsa-let-7b-3p;hsa-miR-1267;hsa-miR-224-5p][hsa-miR-1267;hsa-miR-224-5p][hsa-miR-1267;hsa-miR-224-5p;hsa-miR-365a-3p][hsa-miR-1267;hsa-miR-224-5p;hsa-miR-7-1-3p][hsa-miR-20a-3p;hsa-miR-224-5p][hsa-miR-20a-3p;hsa-miR-224-5p;hsa-miR-3200-3p][hsa-miR-20a-3p;hsa-miR-224-5p;hsa-miR-335-5p][hsa-miR-20a-3p;hsa-miR-224-5p;hsa-miR-34c-3p][hsa-miR-224-5p;hsa-miR-365a-5p]
APIP	3	[hsa-miR-338-3p;hsa-miR-494][hsa-miR-338-3p;hsa-miR-494;hsa-miR-576-5p][hsa-miR-338-3p;hsa-miR-576-5p]
APLF	4	[hsa-miR-135b-5p;hsa-miR-188-3p][hsa-miR-135b-5p;hsa-miR-188-3p;hsa-miR-199a-3p][hsa-miR-135b-5p;hsa-miR-188-3p;hsa-miR-199b-3p][hsa-miR-188-3p;hsa-miR-199a-3p]
APLN	6	[hsa-miR-107;hsa-miR-452-5p][hsa-miR-107;hsa-miR-466;hsa-miR-548d-3p][hsa-miR-107;hsa-miR-548d-3p][hsa-miR-142-5p;hsa-miR-340-5p;hsa-miR-452-5p][hsa-miR-142-5p;hsa-miR-452-5p][hsa-miR-3149;hsa-miR-889]
APLP1	2	[hsa-miR-1276;hsa-miR-203;hsa-miR-3170][hsa-miR-203;hsa-miR-3170]
APLP2	8	[hsa-miR-135b-3p;hsa-miR-199b-3p;hsa-miR-2115-3p][hsa-miR-153;hsa-miR-199b-3p;hsa-miR-2115-3p][hsa-miR-199b-3p;hsa-miR-2115-3p][hsa-miR-199b-3p;hsa-miR-2115-3p;hsa-miR-32-3p][hsa-miR-199b-3p;hsa-miR-2115-3p;hsa-miR-556-3p][hsa-miR-199b-3p;hsa-miR-2115-3p;hsa-miR-573][hsa-miR-199b-3p;hsa-miR-2115-3p;hsa-miR-708-5p][hsa-miR-199b-3p;hsa-miR-2115-3p;hsa-miR-885-5p]
APOBEC2	2	[hsa-miR-214-3p;hsa-miR-219-5p;hsa-miR-362-3p][hsa-miR-219-5p;hsa-miR-362-3p;hsa-miR-7-5p]
APOBEC3A	2	[hsa-miR-200b-5p;hsa-miR-30e-3p;hsa-miR-3680-3p][hsa-miR-30e-3p;hsa-miR-3680-3p]
APOBEC3B	4	[hsa-miR-3614-5p;hsa-miR-3667-3p][hsa-miR-3614-5p;hsa-miR-3667-3p;hsa-miR-505-5p][hsa-miR-3614-5p;hsa-miR-505-5p][hsa-miR-3667-3p;hsa-miR-505-5p]
APOBEC4	4	[hsa-miR-15b-3p;hsa-miR-2114-5p;hsa-miR-34b-3p][hsa-miR-15b-3p;hsa-miR-29b-2-5p;hsa-miR-34b-3p][hsa-miR-15b-3p;hsa-miR-34b-3p][hsa-miR-2114-5p;hsa-miR-34b-3p]
APOL2	2	[hsa-miR-136-5p;hsa-miR-3200-3p][hsa-miR-20a-3p;hsa-miR-3176;hsa-miR-3200-3p]
APOL4	1	[hsa-miR-2110;hsa-miR-548n]
APOLD1	1	[hsa-miR-324-3p;hsa-miR-516b-5p]
APOO	4	[hsa-miR-18a-5p;hsa-miR-200c-3p][hsa-miR-18a-5p;hsa-miR-3185][hsa-miR-3185;hsa-miR-331-5p][hsa-miR-331-5p;hsa-miR-3920]
APOOL	6	[hsa-miR-105-5p;hsa-miR-217;hsa-miR-660-5p][hsa-miR-203;hsa-miR-224-5p][hsa-miR-203;hsa-miR-224-5p;hsa-miR-3913-5p][hsa-miR-203;hsa-miR-224-5p;hsa-miR-660-5p][hsa-miR-217;hsa-miR-3913-5p][hsa-miR-217;hsa-miR-660-5p]
APP	6	[hsa-let-7a-2-3p;hsa-miR-135b-3p][hsa-miR-1270;hsa-miR-135b-3p][hsa-miR-135b-3p;hsa-miR-520e;hsa-miR-93-5p][hsa-miR-135b-3p;hsa-miR-93-5p][hsa-miR-16-5p;hsa-miR-31-5p;hsa-miR-548b-5p][hsa-miR-16-5p;hsa-miR-548b-5p]
APPBP2	8	[hsa-miR-139-5p;hsa-miR-23a-3p][hsa-miR-191-5p;hsa-miR-200a-3p;hsa-miR-23a-3p][hsa-miR-191-5p;hsa-miR-23a-3p][hsa-miR-217;hsa-miR-23a-3p][hsa-miR-23a-3p;hsa-miR-3613-5p][hsa-miR-23a-3p;hsa-miR-491-5p][hsa-miR-23a-3p;hsa-miR-491-5p;hsa-miR-580][hsa-miR-23a-3p;hsa-miR-580;hsa-miR-9-5p]
APPL1	5	[hsa-let-7a-3p;hsa-miR-17-5p;hsa-miR-20b-5p][hsa-let-7a-3p;hsa-miR-20b-5p][hsa-miR-130b-3p;hsa-miR-3614-3p][hsa-miR-146a-5p;hsa-miR-625-5p][hsa-miR-148a-5p;hsa-miR-96-5p]
APPL2	5	[hsa-miR-133b;hsa-miR-27a-5p][hsa-miR-150-5p;hsa-miR-219-5p][hsa-miR-154-5p;hsa-miR-9-3p][hsa-miR-27a-5p;hsa-miR-636][hsa-miR-582-3p;hsa-miR-636]
APTX	5	[hsa-miR-143-3p;hsa-miR-181c-3p][hsa-miR-181c-3p;hsa-miR-22-5p][hsa-miR-22-5p;hsa-miR-32-3p][hsa-miR-22-5p;hsa-miR-335-5p][hsa-miR-3928;hsa-miR-935]
AQP1	2	[hsa-miR-139-5p;hsa-miR-542-3p][hsa-miR-139-5p;hsa-miR-542-3p;hsa-miR-876-5p]
AQP11	6	[hsa-miR-16-5p;hsa-miR-3910;hsa-miR-625-3p][hsa-miR-195-5p;hsa-miR-625-3p][hsa-miR-222-3p;hsa-miR-499a-3p][hsa-miR-222-3p;hsa-miR-499a-3p;hsa-miR-875-5p][hsa-miR-3910;hsa-miR-449a][hsa-miR-3910;hsa-miR-449a;hsa-miR-625-3p]
AQP2	3	[hsa-miR-19a-3p;hsa-miR-339-3p;hsa-miR-582-5p][hsa-miR-19a-3p;hsa-miR-582-5p][hsa-miR-339-3p;hsa-miR-582-5p]
AQP3	4	[hsa-miR-18a-5p;hsa-miR-548t-5p][hsa-miR-30c-5p;hsa-miR-548t-5p][hsa-miR-363-5p;hsa-miR-495;hsa-miR-548t-5p][hsa-miR-363-5p;hsa-miR-548t-5p]
AQP4	6	[hsa-miR-1224-5p;hsa-miR-192-3p;hsa-miR-488-3p][hsa-miR-148a-3p;hsa-miR-192-3p;hsa-miR-3202][hsa-miR-192-3p;hsa-miR-3202;hsa-miR-576-5p][hsa-miR-192-3p;hsa-miR-488-3p][hsa-miR-192-3p;hsa-miR-488-3p;hsa-miR-616-3p][hsa-miR-26a-1-3p;hsa-miR-30e-3p]
AQP5	3	[hsa-miR-19a-3p;hsa-miR-19b-3p][hsa-miR-19a-3p;hsa-miR-19b-3p;hsa-miR-24-3p][hsa-miR-19b-3p;hsa-miR-24-3p]
AQP8	1	[hsa-miR-25-3p;hsa-miR-363-3p;hsa-miR-92b-3p]
AQP9	5	[hsa-miR-1976;hsa-miR-224-3p][hsa-miR-1976;hsa-miR-3662][hsa-miR-3662;hsa-miR-452-3p][hsa-miR-452-3p;hsa-miR-522-3p][hsa-miR-452-3p;hsa-miR-522-3p;hsa-miR-885-5p]
AQPEP	5	[hsa-miR-1254;hsa-miR-3926][hsa-miR-1266;hsa-miR-374b-5p][hsa-miR-374b-5p;hsa-miR-3926;hsa-miR-511][hsa-miR-374b-5p;hsa-miR-511][hsa-miR-3926;hsa-miR-511]
AR	4	[hsa-miR-130a-3p;hsa-miR-130b-3p][hsa-miR-130a-3p;hsa-miR-130b-3p;hsa-miR-514a-3p][hsa-miR-130b-3p;hsa-miR-301a-3p][hsa-miR-130b-3p;hsa-miR-3652]
ARAF	1	[hsa-miR-18a-5p;hsa-miR-449c-5p;hsa-miR-92a-1-5p]
ARAP1	6	[hsa-let-7f-2-3p;hsa-miR-1270][hsa-let-7f-2-3p;hsa-miR-1270;hsa-miR-2115-5p][hsa-let-7f-2-3p;hsa-miR-1270;hsa-miR-296-5p][hsa-let-7f-2-3p;hsa-miR-1270;hsa-miR-3126-3p][hsa-miR-1270;hsa-miR-2115-5p][hsa-miR-296-5p;hsa-miR-656]
ARAP2	6	[hsa-let-7a-3p;hsa-let-7f-1-3p][hsa-let-7a-3p;hsa-let-7f-1-3p;hsa-miR-106b-5p][hsa-let-7a-3p;hsa-let-7f-1-3p;hsa-miR-130a-3p][hsa-let-7a-3p;hsa-let-7f-1-3p;hsa-miR-30e-5p][hsa-miR-301a-3p;hsa-miR-30c-5p;hsa-miR-519c-3p][hsa-miR-30c-5p;hsa-miR-519c-3p]
ARAP3	4	[hsa-miR-142-5p;hsa-miR-22-3p][hsa-miR-142-5p;hsa-miR-22-3p;hsa-miR-28-5p][hsa-miR-142-5p;hsa-miR-28-5p][hsa-miR-22-3p;hsa-miR-340-5p]
ARC	7	[hsa-miR-135a-5p;hsa-miR-3065-5p;hsa-miR-455-5p][hsa-miR-135a-5p;hsa-miR-3065-5p;hsa-miR-495][hsa-miR-135a-5p;hsa-miR-495][hsa-miR-135a-5p;hsa-miR-7-1-3p][hsa-miR-135a-5p;hsa-miR-7-2-3p][hsa-miR-3065-5p;hsa-miR-455-5p][hsa-miR-3065-5p;hsa-miR-7-2-3p]
ARCN1	6	[hsa-miR-186-5p;hsa-miR-548s][hsa-miR-374b-5p;hsa-miR-424-5p;hsa-miR-542-3p][hsa-miR-374b-5p;hsa-miR-454-5p;hsa-miR-542-3p][hsa-miR-374b-5p;hsa-miR-542-3p][hsa-miR-374b-5p;hsa-miR-542-3p;hsa-miR-548e][hsa-miR-374b-5p;hsa-miR-556-3p]
AREG	6	[hsa-miR-203;hsa-miR-3653;hsa-miR-539-5p][hsa-miR-203;hsa-miR-449b-5p;hsa-miR-539-5p][hsa-miR-203;hsa-miR-500a-3p][hsa-miR-203;hsa-miR-539-5p][hsa-miR-500a-3p;hsa-miR-944][hsa-miR-539-5p;hsa-miR-944]
ARF1	6	[hsa-miR-138-5p;hsa-miR-20b-5p;hsa-miR-26a-5p][hsa-miR-20b-5p;hsa-miR-26a-5p][hsa-miR-223-5p;hsa-miR-374a-3p][hsa-miR-223-5p;hsa-miR-374a-3p;hsa-miR-885-5p][hsa-miR-3065-3p;hsa-miR-570-3p][hsa-miR-338-5p;hsa-miR-570-3p]
ARF3	7	[hsa-let-7f-2-3p;hsa-miR-181c-5p][hsa-miR-140-3p;hsa-miR-934;hsa-miR-935][hsa-miR-15b-5p;hsa-miR-181c-5p][hsa-miR-181c-5p;hsa-miR-934;hsa-miR-935][hsa-miR-1;hsa-miR-15b-5p;hsa-miR-181c-5p][hsa-miR-324-3p;hsa-miR-934;hsa-miR-935][hsa-miR-934;hsa-miR-935]
ARF4	6	[hsa-miR-142-3p;hsa-miR-19b-1-5p][hsa-miR-148a-3p;hsa-miR-19b-1-5p][hsa-miR-1;hsa-miR-142-3p;hsa-miR-30b-5p][hsa-miR-1;hsa-miR-152][hsa-miR-1;hsa-miR-190b;hsa-miR-30b-5p][hsa-miR-30b-5p;hsa-miR-3185]
ARF5	7	[hsa-let-7e-5p;hsa-miR-28-5p][hsa-miR-1304-5p;hsa-miR-29c-3p;hsa-miR-545-3p][hsa-miR-196b-3p;hsa-miR-29c-3p;hsa-miR-326][hsa-miR-224-5p;hsa-miR-29c-3p][hsa-miR-29a-3p;hsa-miR-29c-3p;hsa-miR-545-3p][hsa-miR-29c-3p;hsa-miR-326][hsa-miR-29c-3p;hsa-miR-545-3p]
ARF6	7	[hsa-miR-101-3p;hsa-miR-543][hsa-miR-1269a;hsa-miR-140-5p][hsa-miR-23b-3p;hsa-miR-543;hsa-miR-934][hsa-miR-28-3p;hsa-miR-3919;hsa-miR-93-5p][hsa-miR-28-3p;hsa-miR-3928][hsa-miR-28-3p;hsa-miR-93-5p][hsa-miR-543;hsa-miR-934]
ARFGAP2	2	[hsa-miR-129-2-3p;hsa-miR-499a-3p][hsa-miR-129-2-3p;hsa-miR-499a-3p;hsa-miR-514a-3p]
ARFGAP3	4	[hsa-miR-1283;hsa-miR-2116-3p][hsa-miR-1283;hsa-miR-2116-3p;hsa-miR-338-5p][hsa-miR-1283;hsa-miR-2116-3p;hsa-miR-378b][hsa-miR-146a-3p;hsa-miR-2116-3p]
ARFGEF1	6	[hsa-miR-144-3p;hsa-miR-30e-3p][hsa-miR-144-3p;hsa-miR-30e-3p;hsa-miR-95][hsa-miR-148a-3p;hsa-miR-376c][hsa-miR-205-5p;hsa-miR-30d-3p][hsa-miR-2355-3p;hsa-miR-30e-3p][hsa-miR-2355-3p;hsa-miR-30e-3p;hsa-miR-3161]
ARFGEF2	7	[hsa-let-7f-2-3p;hsa-miR-22-5p][hsa-let-7f-2-3p;hsa-miR-22-5p;hsa-miR-3065-5p][hsa-miR-1227;hsa-miR-195-3p][hsa-miR-1227;hsa-miR-195-3p;hsa-miR-29b-3p][hsa-miR-18a-5p;hsa-miR-195-3p][hsa-miR-200c-3p;hsa-miR-22-5p][hsa-miR-22-5p;hsa-miR-3065-5p;hsa-miR-545-3p]
ARFIP1	6	[hsa-miR-148a-3p;hsa-miR-3150a-3p][hsa-miR-148a-3p;hsa-miR-3150a-3p;hsa-miR-374c-5p][hsa-miR-148a-3p;hsa-miR-3150a-3p;hsa-miR-513c-5p][hsa-miR-148a-3p;hsa-miR-96-5p][hsa-miR-30b-5p;hsa-miR-3161;hsa-miR-421][hsa-miR-3161;hsa-miR-421]
ARFIP2	7	[hsa-miR-146b-3p;hsa-miR-363-5p;hsa-miR-720][hsa-miR-146b-3p;hsa-miR-512-3p][hsa-miR-146b-3p;hsa-miR-512-3p;hsa-miR-548s][hsa-miR-146b-3p;hsa-miR-720][hsa-miR-221-5p;hsa-miR-9-5p][hsa-miR-3660;hsa-miR-9-5p][hsa-miR-573;hsa-miR-9-5p]
ARG2	7	[hsa-let-7f-5p;hsa-miR-19b-1-5p][hsa-miR-1910;hsa-miR-30b-3p][hsa-miR-1910;hsa-miR-3692-5p][hsa-miR-30b-3p;hsa-miR-654-5p][hsa-miR-449c-5p;hsa-miR-516b-5p;hsa-miR-654-5p][hsa-miR-449c-5p;hsa-miR-654-5p][hsa-miR-449c-5p;hsa-miR-654-5p;hsa-miR-98]
ARGFX	1	[hsa-miR-3681-5p;hsa-miR-3691-5p]
ARGLU1	7	[hsa-miR-101-3p;hsa-miR-320c][hsa-miR-10a-5p;hsa-miR-20a-3p;hsa-miR-421][hsa-miR-10b-5p;hsa-miR-20a-3p][hsa-miR-144-3p;hsa-miR-16-5p;hsa-miR-3651][hsa-miR-16-5p;hsa-miR-3651][hsa-miR-20a-3p;hsa-miR-421][hsa-miR-20a-3p;hsa-miR-421;hsa-miR-486-5p]
ARHGAP1	5	[hsa-miR-124-3p;hsa-miR-19b-3p][hsa-miR-130a-3p;hsa-miR-18a-5p][hsa-miR-130b-3p;hsa-miR-18a-5p][hsa-miR-130b-3p;hsa-miR-18a-5p;hsa-miR-3607-3p][hsa-miR-454-3p;hsa-miR-493-5p]
ARHGAP10	2	[hsa-miR-205-3p;hsa-miR-582-5p][hsa-miR-582-5p;hsa-miR-642a-5p]
ARHGAP11A	7	[hsa-miR-135a-5p;hsa-miR-140-3p][hsa-miR-135a-5p;hsa-miR-140-3p;hsa-miR-19a-3p][hsa-miR-135a-5p;hsa-miR-3146][hsa-miR-135b-5p;hsa-miR-19a-3p;hsa-miR-19a-5p][hsa-miR-183-5p;hsa-miR-19a-3p][hsa-miR-183-5p;hsa-miR-19a-3p;hsa-miR-19a-5p][hsa-miR-19a-3p;hsa-miR-19a-5p]
ARHGAP11B	4	[hsa-miR-1258;hsa-miR-18a-5p;hsa-miR-18b-5p][hsa-miR-18a-5p;hsa-miR-18b-5p][hsa-miR-18a-5p;hsa-miR-18b-5p;hsa-miR-193b-5p][hsa-miR-18a-5p;hsa-miR-18b-5p;hsa-miR-512-3p]
ARHGAP12	7	[hsa-miR-125a-5p;hsa-miR-770-5p][hsa-miR-126-3p;hsa-miR-30d-3p;hsa-miR-770-5p][hsa-miR-128;hsa-miR-130a-3p;hsa-miR-18a-5p][hsa-miR-128;hsa-miR-130b-3p;hsa-miR-18a-5p][hsa-miR-128;hsa-miR-18a-5p][hsa-miR-128;hsa-miR-18a-5p;hsa-miR-20b-5p][hsa-miR-130b-3p;hsa-miR-770-5p]
ARHGAP15	6	[hsa-miR-105-5p;hsa-miR-365a-5p;hsa-miR-598][hsa-miR-223-3p;hsa-miR-33a-3p;hsa-miR-944][hsa-miR-223-3p;hsa-miR-365a-5p;hsa-miR-598][hsa-miR-223-3p;hsa-miR-944][hsa-miR-365a-5p;hsa-miR-598][hsa-miR-3662;hsa-miR-944]
ARHGAP17	7	[hsa-miR-140-3p;hsa-miR-30d-5p][hsa-miR-140-3p;hsa-miR-30d-5p;hsa-miR-96-5p][hsa-miR-140-3p;hsa-miR-30e-5p][hsa-miR-140-3p;hsa-miR-424-5p][hsa-miR-184;hsa-miR-26a-5p][hsa-miR-184;hsa-miR-26a-5p;hsa-miR-30d-5p][hsa-miR-26a-5p;hsa-miR-30d-5p]
ARHGAP18	5	[hsa-miR-16-5p;hsa-miR-3128;hsa-miR-582-3p][hsa-miR-16-5p;hsa-miR-3619-5p;hsa-miR-582-3p][hsa-miR-16-5p;hsa-miR-543][hsa-miR-16-5p;hsa-miR-582-3p;hsa-miR-885-3p][hsa-miR-16-5p;hsa-miR-885-3p]
ARHGAP19	5	[hsa-miR-1243;hsa-miR-140-5p;hsa-miR-193b-3p][hsa-miR-1243;hsa-miR-193b-3p][hsa-miR-1243;hsa-miR-193b-3p;hsa-miR-200c-3p][hsa-miR-1243;hsa-miR-193b-3p;hsa-miR-429][hsa-miR-135b-5p;hsa-miR-193b-3p]
ARHGAP20	6	[hsa-let-7f-5p;hsa-miR-16-5p;hsa-miR-195-5p][hsa-let-7g-5p;hsa-miR-16-5p;hsa-miR-195-5p][hsa-let-7i-5p;hsa-miR-16-5p;hsa-miR-515-3p][hsa-miR-16-5p;hsa-miR-195-5p][hsa-miR-16-5p;hsa-miR-656][hsa-miR-16-5p;hsa-miR-944]
ARHGAP21	7	[hsa-miR-1227;hsa-miR-197-3p][hsa-miR-1227;hsa-miR-197-3p;hsa-miR-3170][hsa-miR-1227;hsa-miR-197-3p;hsa-miR-3620][hsa-miR-1227;hsa-miR-197-3p;hsa-miR-9-3p][hsa-miR-199a-3p;hsa-miR-9-3p][hsa-miR-1;hsa-miR-197-3p][hsa-miR-27b-3p;hsa-miR-9-3p]
ARHGAP23	6	[hsa-miR-141-3p;hsa-miR-582-5p][hsa-miR-16-2-3p;hsa-miR-338-5p;hsa-miR-582-5p][hsa-miR-338-5p;hsa-miR-3646][hsa-miR-338-5p;hsa-miR-582-5p][hsa-miR-379-5p;hsa-miR-429;hsa-miR-592][hsa-miR-379-5p;hsa-miR-582-5p]
ARHGAP24	7	[hsa-miR-100-3p;hsa-miR-141-3p;hsa-miR-203][hsa-miR-1271-5p;hsa-miR-141-3p][hsa-miR-1271-5p;hsa-miR-141-3p;hsa-miR-590-5p][hsa-miR-141-3p;hsa-miR-203][hsa-miR-141-3p;hsa-miR-203;hsa-miR-582-3p][hsa-miR-3613-3p;hsa-miR-381;hsa-miR-545-3p][hsa-miR-381;hsa-miR-545-3p;hsa-miR-590-5p]
ARHGAP26	7	[hsa-miR-183-3p;hsa-miR-30a-5p;hsa-miR-30b-5p][hsa-miR-183-5p;hsa-miR-26a-2-3p;hsa-miR-582-5p][hsa-miR-18a-5p;hsa-miR-548f;hsa-miR-582-5p][hsa-miR-18a-5p;hsa-miR-582-5p][hsa-miR-30a-5p;hsa-miR-30b-5p][hsa-miR-30a-5p;hsa-miR-30b-5p;hsa-miR-3616-5p][hsa-miR-30b-5p;hsa-miR-30d-5p]
ARHGAP28	4	[hsa-let-7a-5p;hsa-let-7i-5p][hsa-let-7c;hsa-let-7g-5p][hsa-let-7i-5p;hsa-miR-16-5p;hsa-miR-196b-5p][hsa-miR-16-5p;hsa-miR-369-3p]
ARHGAP29	6	[hsa-miR-199a-5p;hsa-miR-25-3p;hsa-miR-92b-3p][hsa-miR-199a-5p;hsa-miR-32-5p;hsa-miR-92b-3p][hsa-miR-199a-5p;hsa-miR-377-3p;hsa-miR-92b-3p][hsa-miR-204-5p;hsa-miR-519b-3p][hsa-miR-204-5p;hsa-miR-519b-3p;hsa-miR-92a-3p][hsa-miR-32-3p;hsa-miR-519c-3p]
ARHGAP31	6	[hsa-miR-137;hsa-miR-148b-5p][hsa-miR-137;hsa-miR-3117-3p;hsa-miR-495][hsa-miR-137;hsa-miR-495][hsa-miR-137;hsa-miR-495;hsa-miR-590-5p][hsa-miR-137;hsa-miR-590-5p][hsa-miR-148b-5p;hsa-miR-206]
ARHGAP32	7	[hsa-let-7a-3p;hsa-miR-27a-3p;hsa-miR-30a-3p][hsa-miR-15a-5p;hsa-miR-27a-3p;hsa-miR-30a-3p][hsa-miR-16-5p;hsa-miR-27a-3p;hsa-miR-30a-3p][hsa-miR-27a-3p;hsa-miR-30a-3p][hsa-miR-27a-3p;hsa-miR-30a-3p;hsa-miR-3942-5p][hsa-miR-27a-3p;hsa-miR-513b][hsa-miR-27a-3p;hsa-miR-590-5p]
ARHGAP33	4	[hsa-miR-299-5p;hsa-miR-29b-2-5p][hsa-miR-299-5p;hsa-miR-29b-2-5p;hsa-miR-584-5p][hsa-miR-29b-2-5p;hsa-miR-490-3p;hsa-miR-584-5p][hsa-miR-29b-2-5p;hsa-miR-584-5p]
ARHGAP35	6	[hsa-miR-107;hsa-miR-18a-5p;hsa-miR-3607-5p][hsa-miR-107;hsa-miR-338-5p][hsa-miR-130b-3p;hsa-miR-301a-3p][hsa-miR-130b-3p;hsa-miR-301a-3p;hsa-miR-579][hsa-miR-18a-5p;hsa-miR-23c;hsa-miR-3607-5p][hsa-miR-18a-5p;hsa-miR-3607-5p]
ARHGAP36	5	[hsa-miR-206;hsa-miR-3115][hsa-miR-206;hsa-miR-324-5p][hsa-miR-206;hsa-miR-324-5p;hsa-miR-513c-5p][hsa-miR-3115;hsa-miR-3125][hsa-miR-3115;hsa-miR-3125;hsa-miR-542-3p]
ARHGAP39	6	[hsa-miR-148b-5p;hsa-miR-32-3p][hsa-miR-148b-5p;hsa-miR-32-3p;hsa-miR-618][hsa-miR-148b-5p;hsa-miR-577][hsa-miR-539-5p;hsa-miR-582-5p;hsa-miR-616-5p][hsa-miR-582-5p;hsa-miR-616-5p][hsa-miR-582-5p;hsa-miR-9-5p]
ARHGAP42	5	[hsa-miR-1179;hsa-miR-514a-3p;hsa-miR-577][hsa-miR-1237;hsa-miR-577;hsa-miR-93-3p][hsa-miR-514a-3p;hsa-miR-592;hsa-miR-93-3p][hsa-miR-577;hsa-miR-651;hsa-miR-93-3p][hsa-miR-577;hsa-miR-93-3p]
ARHGAP44	7	[hsa-miR-136-3p;hsa-miR-96-3p][hsa-miR-138-2-3p;hsa-miR-200b-5p;hsa-miR-96-3p][hsa-miR-200b-5p;hsa-miR-653][hsa-miR-200b-5p;hsa-miR-96-3p][hsa-miR-24-3p;hsa-miR-96-3p][hsa-miR-493-5p;hsa-miR-514b-3p;hsa-miR-96-3p][hsa-miR-549;hsa-miR-96-3p]
ARHGAP5	7	[hsa-let-7b-3p;hsa-miR-27b-5p][hsa-miR-1179;hsa-miR-30b-3p;hsa-miR-362-5p][hsa-miR-194-5p;hsa-miR-362-5p][hsa-miR-30b-3p;hsa-miR-362-5p][hsa-miR-362-5p;hsa-miR-664-3p][hsa-miR-374b-5p;hsa-miR-424-5p;hsa-miR-493-3p][hsa-miR-374b-5p;hsa-miR-493-3p]
ARHGAP6	6	[hsa-miR-200c-3p;hsa-miR-502-3p][hsa-miR-204-5p;hsa-miR-3653;hsa-miR-502-3p][hsa-miR-204-5p;hsa-miR-410;hsa-miR-502-3p][hsa-miR-204-5p;hsa-miR-502-3p][hsa-miR-3653;hsa-miR-410;hsa-miR-502-3p][hsa-miR-410;hsa-miR-502-3p]
ARHGAP9	4	[hsa-miR-138-5p;hsa-miR-1976][hsa-miR-138-5p;hsa-miR-342-5p][hsa-miR-138-5p;hsa-miR-342-5p;hsa-miR-491-5p][hsa-miR-342-5p;hsa-miR-491-5p]
ARHGDIA	5	[hsa-miR-15a-3p;hsa-miR-195-3p;hsa-miR-429][hsa-miR-195-3p;hsa-miR-429][hsa-miR-195-3p;hsa-miR-429;hsa-miR-584-5p][hsa-miR-34b-5p;hsa-miR-96-5p][hsa-miR-517a-3p;hsa-miR-96-5p]
ARHGDIB	1	[hsa-miR-193a-5p;hsa-miR-342-3p]
ARHGEF1	5	[hsa-miR-125a-5p;hsa-miR-125b-5p;hsa-miR-577][hsa-miR-125b-5p;hsa-miR-577][hsa-miR-200b-3p;hsa-miR-429;hsa-miR-627][hsa-miR-3141;hsa-miR-3202][hsa-miR-3202;hsa-miR-577]
ARHGEF10	4	[hsa-miR-106a-5p;hsa-miR-20a-5p][hsa-miR-106b-5p;hsa-miR-17-5p][hsa-miR-106b-5p;hsa-miR-372][hsa-miR-17-5p;hsa-miR-452-5p]
ARHGEF10L	7	[hsa-let-7a-3p;hsa-let-7g-3p;hsa-miR-449c-5p][hsa-let-7b-3p;hsa-miR-150-5p;hsa-miR-767-5p][hsa-let-7b-3p;hsa-miR-3074-3p][hsa-let-7b-3p;hsa-miR-767-5p][hsa-let-7g-3p;hsa-miR-150-5p;hsa-miR-449c-5p][hsa-let-7g-3p;hsa-miR-449c-5p][hsa-let-7g-3p;hsa-miR-449c-5p;hsa-miR-767-5p]
ARHGEF11	7	[hsa-miR-106a-5p;hsa-miR-3120-3p;hsa-miR-656][hsa-miR-20a-5p;hsa-miR-20b-5p][hsa-miR-20a-5p;hsa-miR-3120-3p;hsa-miR-656][hsa-miR-221-5p;hsa-miR-3120-3p][hsa-miR-221-5p;hsa-miR-3120-3p;hsa-miR-656][hsa-miR-3120-3p;hsa-miR-3662][hsa-miR-3120-3p;hsa-miR-424-5p;hsa-miR-656]
ARHGEF12	6	[hsa-miR-1276;hsa-miR-130b-3p][hsa-miR-1276;hsa-miR-130b-3p;hsa-miR-21-5p][hsa-miR-130b-3p;hsa-miR-16-5p][hsa-miR-142-5p;hsa-miR-148b-3p][hsa-miR-148b-3p;hsa-miR-424-5p][hsa-miR-222-5p;hsa-miR-361-5p]
ARHGEF15	7	[hsa-let-7a-5p;hsa-let-7c;hsa-let-7d-5p][hsa-let-7c;hsa-let-7d-5p][hsa-let-7c;hsa-let-7d-5p;hsa-let-7f-5p][hsa-let-7c;hsa-let-7d-5p;hsa-let-7i-5p][hsa-let-7c;hsa-let-7d-5p;hsa-miR-98][hsa-let-7c;hsa-let-7f-5p][hsa-let-7c;hsa-let-7i-5p]
ARHGEF17	6	[hsa-miR-130b-3p;hsa-miR-301a-3p;hsa-miR-452-5p][hsa-miR-130b-3p;hsa-miR-301b;hsa-miR-452-5p][hsa-miR-32-5p;hsa-miR-455-5p;hsa-miR-494][hsa-miR-32-5p;hsa-miR-494][hsa-miR-32-5p;hsa-miR-494;hsa-miR-641][hsa-miR-32-5p;hsa-miR-519c-3p;hsa-miR-9-5p]
ARHGEF18	7	[hsa-miR-106a-5p;hsa-miR-106b-5p;hsa-miR-148b-5p][hsa-miR-106a-5p;hsa-miR-148b-5p][hsa-miR-106a-5p;hsa-miR-148b-5p;hsa-miR-20b-5p][hsa-miR-106a-5p;hsa-miR-148b-5p;hsa-miR-93-5p][hsa-miR-106a-5p;hsa-miR-17-5p][hsa-miR-106a-5p;hsa-miR-20a-5p][hsa-miR-141-3p;hsa-miR-200a-3p]
ARHGEF2	8	[hsa-miR-135a-5p;hsa-miR-135b-5p;hsa-miR-9-5p][hsa-miR-135b-5p;hsa-miR-24-1-5p;hsa-miR-9-5p][hsa-miR-135b-5p;hsa-miR-24-2-5p][hsa-miR-135b-5p;hsa-miR-31-5p][hsa-miR-135b-5p;hsa-miR-3129-5p;hsa-miR-543][hsa-miR-135b-5p;hsa-miR-543][hsa-miR-135b-5p;hsa-miR-590-3p][hsa-miR-135b-5p;hsa-miR-9-5p]
ARHGEF25	4	[hsa-miR-3065-3p;hsa-miR-410][hsa-miR-342-3p;hsa-miR-410;hsa-miR-532-3p][hsa-miR-342-3p;hsa-miR-532-3p][hsa-miR-342-3p;hsa-miR-532-3p;hsa-miR-642a-5p]
ARHGEF26	5	[hsa-miR-19a-3p;hsa-miR-19b-3p][hsa-miR-19a-3p;hsa-miR-19b-3p;hsa-miR-26b-5p][hsa-miR-19a-3p;hsa-miR-19b-3p;hsa-miR-31-5p][hsa-miR-19a-3p;hsa-miR-19b-3p;hsa-miR-340-5p][hsa-miR-26b-5p;hsa-miR-31-5p]
ARHGEF3	6	[hsa-let-7b-3p;hsa-miR-101-3p;hsa-miR-182-5p][hsa-let-7b-3p;hsa-miR-101-3p;hsa-miR-429][hsa-let-7b-3p;hsa-miR-101-3p;hsa-miR-507][hsa-let-7d-3p;hsa-miR-30a-5p][hsa-let-7d-3p;hsa-miR-30a-5p;hsa-miR-3200-3p][hsa-miR-200c-3p;hsa-miR-20b-5p]
ARHGEF33	7	[hsa-miR-155-3p;hsa-miR-204-5p;hsa-miR-542-5p][hsa-miR-155-3p;hsa-miR-542-5p][hsa-miR-155-3p;hsa-miR-675-3p][hsa-miR-3149;hsa-miR-411-3p][hsa-miR-381;hsa-miR-431-5p;hsa-miR-548b-3p][hsa-miR-431-5p;hsa-miR-452-3p;hsa-miR-548b-3p][hsa-miR-431-5p;hsa-miR-548b-3p]
ARHGEF37	5	[hsa-miR-124-3p;hsa-miR-183-5p][hsa-miR-181a-5p;hsa-miR-181c-5p;hsa-miR-24-1-5p][hsa-miR-181c-5p;hsa-miR-183-5p][hsa-miR-181c-5p;hsa-miR-183-5p;hsa-miR-24-1-5p][hsa-miR-183-5p;hsa-miR-24-1-5p]
ARHGEF38	2	[hsa-miR-3150b-3p;hsa-miR-340-5p;hsa-miR-362-5p][hsa-miR-3150b-3p;hsa-miR-362-5p]
ARHGEF4	5	[hsa-miR-1304-5p;hsa-miR-137;hsa-miR-301b][hsa-miR-135b-5p;hsa-miR-511][hsa-miR-137;hsa-miR-301b][hsa-miR-137;hsa-miR-301b;hsa-miR-3910][hsa-miR-137;hsa-miR-301b;hsa-miR-592]
ARHGEF40	7	[hsa-miR-132-3p;hsa-miR-369-3p][hsa-miR-132-3p;hsa-miR-369-3p;hsa-miR-374b-5p][hsa-miR-212-3p;hsa-miR-374b-5p][hsa-miR-212-3p;hsa-miR-374b-5p;hsa-miR-410][hsa-miR-374b-5p;hsa-miR-410][hsa-miR-374b-5p;hsa-miR-410;hsa-miR-889][hsa-miR-374b-5p;hsa-miR-889]
ARHGEF6	5	[hsa-miR-1258;hsa-miR-135b-5p;hsa-miR-676-5p][hsa-miR-135a-5p;hsa-miR-581;hsa-miR-676-5p][hsa-miR-135b-5p;hsa-miR-30e-5p;hsa-miR-676-5p][hsa-miR-135b-5p;hsa-miR-496;hsa-miR-676-5p][hsa-miR-3653;hsa-miR-676-5p]
ARHGEF7	7	[hsa-miR-106a-5p;hsa-miR-143-3p;hsa-miR-20a-5p][hsa-miR-106b-5p;hsa-miR-143-3p;hsa-miR-148a-3p][hsa-miR-106b-5p;hsa-miR-148a-3p][hsa-miR-106b-5p;hsa-miR-148a-3p;hsa-miR-580][hsa-miR-143-3p;hsa-miR-20a-5p][hsa-miR-143-3p;hsa-miR-98][hsa-miR-20a-5p;hsa-miR-616-5p]
ARHGEF9	8	[hsa-miR-105-5p;hsa-miR-335-3p;hsa-miR-375][hsa-miR-141-3p;hsa-miR-18a-3p][hsa-miR-18a-3p;hsa-miR-214-3p][hsa-miR-18a-3p;hsa-miR-375][hsa-miR-224-5p;hsa-miR-335-3p;hsa-miR-375][hsa-miR-335-3p;hsa-miR-375][hsa-miR-335-3p;hsa-miR-375;hsa-miR-449a][hsa-miR-335-3p;hsa-miR-375;hsa-miR-641]
ARID1A	5	[hsa-miR-101-3p;hsa-miR-221-3p][hsa-miR-1301;hsa-miR-449b-5p][hsa-miR-200c-5p;hsa-miR-3150b-3p][hsa-miR-221-3p;hsa-miR-551a;hsa-miR-93-3p][hsa-miR-221-3p;hsa-miR-93-3p]
ARID1B	5	[hsa-let-7b-3p;hsa-miR-1248][hsa-let-7b-3p;hsa-miR-1248;hsa-miR-27b-3p][hsa-miR-1248;hsa-miR-488-3p][hsa-miR-181c-3p;hsa-miR-340-5p][hsa-miR-181c-3p;hsa-miR-3609]
ARID2	5	[hsa-miR-149-3p;hsa-miR-16-1-3p;hsa-miR-27a-3p][hsa-miR-27a-3p;hsa-miR-30b-3p][hsa-miR-27a-3p;hsa-miR-320e][hsa-miR-27a-3p;hsa-miR-320e;hsa-miR-369-3p][hsa-miR-374b-5p;hsa-miR-410]
ARID3A	7	[hsa-let-7d-5p;hsa-miR-142-5p;hsa-miR-148b-3p][hsa-let-7d-5p;hsa-miR-148b-3p][hsa-let-7g-5p;hsa-miR-148a-3p;hsa-miR-148b-3p][hsa-let-7g-5p;hsa-miR-148b-3p][hsa-let-7g-5p;hsa-miR-148b-3p;hsa-miR-26b-5p][hsa-let-7g-5p;hsa-miR-148b-3p;hsa-miR-98][hsa-miR-148a-3p;hsa-miR-148b-3p]
ARID3B	6	[hsa-let-7a-5p;hsa-miR-219-5p][hsa-let-7e-5p;hsa-let-7g-5p;hsa-miR-3611][hsa-let-7e-5p;hsa-miR-1286;hsa-miR-3611][hsa-let-7e-5p;hsa-miR-3065-5p;hsa-miR-3611][hsa-let-7e-5p;hsa-miR-3611][hsa-let-7e-5p;hsa-miR-3927;hsa-miR-514a-3p]
ARID4A	8	[hsa-miR-153;hsa-miR-33a-5p][hsa-miR-153;hsa-miR-33a-5p;hsa-miR-655][hsa-miR-27a-3p;hsa-miR-3607-3p][hsa-miR-29c-3p;hsa-miR-33a-5p;hsa-miR-374c-5p][hsa-miR-3169;hsa-miR-33a-5p][hsa-miR-33a-5p;hsa-miR-374c-5p][hsa-miR-33a-5p;hsa-miR-374c-5p;hsa-miR-548e][hsa-miR-33a-5p;hsa-miR-374c-5p;hsa-miR-616-5p]
ARID4B	6	[hsa-miR-200b-3p;hsa-miR-224-3p;hsa-miR-374b-5p][hsa-miR-200b-3p;hsa-miR-374b-5p][hsa-miR-20b-5p;hsa-miR-221-3p][hsa-miR-33a-5p;hsa-miR-486-5p;hsa-miR-664-3p][hsa-miR-33a-5p;hsa-miR-664-3p][hsa-miR-374b-5p;hsa-miR-519c-3p]
ARID5B	7	[hsa-miR-101-3p;hsa-miR-381][hsa-miR-143-3p;hsa-miR-188-5p;hsa-miR-301a-3p][hsa-miR-188-5p;hsa-miR-301a-3p][hsa-miR-223-5p;hsa-miR-301a-3p][hsa-miR-223-5p;hsa-miR-301a-3p;hsa-miR-378c][hsa-miR-223-5p;hsa-miR-301a-3p;hsa-miR-450b-5p][hsa-miR-301a-3p;hsa-miR-7-5p]
ARIH1	6	[hsa-let-7a-2-3p;hsa-miR-935][hsa-miR-19b-1-5p;hsa-miR-20a-5p;hsa-miR-372][hsa-miR-19b-1-5p;hsa-miR-20a-5p;hsa-miR-3920][hsa-miR-19b-1-5p;hsa-miR-20a-5p;hsa-miR-491-3p][hsa-miR-19b-1-5p;hsa-miR-372][hsa-miR-22-5p;hsa-miR-455-3p]
ARIH2	6	[hsa-miR-200b-3p;hsa-miR-337-3p;hsa-miR-625-5p][hsa-miR-200b-3p;hsa-miR-493-5p;hsa-miR-625-5p][hsa-miR-200b-3p;hsa-miR-625-5p][hsa-miR-3609;hsa-miR-548t-5p][hsa-miR-3609;hsa-miR-625-5p][hsa-miR-429;hsa-miR-449b-3p]
ARL1	6	[hsa-let-7a-3p;hsa-miR-125a-3p;hsa-miR-181c-5p][hsa-let-7a-3p;hsa-miR-181c-5p][hsa-let-7a-3p;hsa-miR-181c-5p;hsa-miR-181d][hsa-let-7a-3p;hsa-miR-181c-5p;hsa-miR-943][hsa-miR-181c-5p;hsa-miR-3145-3p][hsa-miR-186-5p;hsa-miR-664-3p]
ARL11	1	[hsa-miR-513c-5p;hsa-miR-514b-5p]
ARL13B	3	[hsa-miR-133b;hsa-miR-496;hsa-miR-7-2-3p][hsa-miR-31-3p;hsa-miR-495;hsa-miR-512-3p][hsa-miR-31-3p;hsa-miR-512-3p;hsa-miR-7-1-3p]
ARL15	7	[hsa-miR-139-5p;hsa-miR-18a-5p][hsa-miR-139-5p;hsa-miR-18a-5p;hsa-miR-30a-5p][hsa-miR-1468;hsa-miR-429][hsa-miR-18a-5p;hsa-miR-199b-3p;hsa-miR-30d-5p][hsa-miR-18a-5p;hsa-miR-30c-5p][hsa-miR-18a-5p;hsa-miR-30d-5p][hsa-miR-18a-5p;hsa-miR-30d-5p;hsa-miR-497-3p]
ARL17A	4	[hsa-miR-1304-5p;hsa-miR-221-3p;hsa-miR-548l][hsa-miR-221-3p;hsa-miR-3160-3p;hsa-miR-511][hsa-miR-221-3p;hsa-miR-3174][hsa-miR-221-3p;hsa-miR-548l]
ARL2BP	6	[hsa-miR-200b-3p;hsa-miR-200c-3p][hsa-miR-200c-3p;hsa-miR-374a-5p][hsa-miR-200c-3p;hsa-miR-374a-5p;hsa-miR-374c-5p][hsa-miR-200c-3p;hsa-miR-374c-5p][hsa-miR-200c-3p;hsa-miR-596][hsa-miR-369-3p;hsa-miR-429]
ARL3	8	[hsa-let-7b-3p;hsa-miR-200b-3p;hsa-miR-934][hsa-let-7b-3p;hsa-miR-216b;hsa-miR-934][hsa-let-7b-3p;hsa-miR-556-3p;hsa-miR-934][hsa-let-7b-3p;hsa-miR-934][hsa-let-7b-3p;hsa-miR-942][hsa-miR-1287;hsa-miR-495;hsa-miR-934][hsa-miR-200b-3p;hsa-miR-934][hsa-miR-495;hsa-miR-934]
ARL4A	7	[hsa-miR-130a-3p;hsa-miR-301a-3p;hsa-miR-99a-3p][hsa-miR-138-1-3p;hsa-miR-30a-5p;hsa-miR-3692-3p][hsa-miR-196a-3p;hsa-miR-30a-5p;hsa-miR-3692-3p][hsa-miR-301a-3p;hsa-miR-99a-3p][hsa-miR-30a-5p;hsa-miR-3692-3p][hsa-miR-3679-3p;hsa-miR-3692-3p][hsa-miR-520a-3p;hsa-miR-576-5p]
ARL4C	7	[hsa-miR-106a-5p;hsa-miR-18a-5p;hsa-miR-96-5p][hsa-miR-106a-5p;hsa-miR-96-5p][hsa-miR-1301;hsa-miR-548s;hsa-miR-96-5p][hsa-miR-18a-5p;hsa-miR-29a-3p;hsa-miR-96-5p][hsa-miR-18a-5p;hsa-miR-3065-3p;hsa-miR-96-5p][hsa-miR-18a-5p;hsa-miR-96-5p][hsa-miR-224-5p;hsa-miR-654-3p]
ARL4D	7	[hsa-let-7a-5p;hsa-let-7g-5p;hsa-miR-17-5p][hsa-let-7f-5p;hsa-miR-520a-3p][hsa-let-7g-5p;hsa-miR-17-5p;hsa-miR-600][hsa-let-7i-5p;hsa-miR-17-5p][hsa-let-7i-5p;hsa-miR-17-5p;hsa-miR-3927][hsa-miR-17-5p;hsa-miR-3927][hsa-miR-520a-3p;hsa-miR-520c-3p]
ARL5A	6	[hsa-let-7a-3p;hsa-let-7b-3p][hsa-let-7a-3p;hsa-let-7b-3p;hsa-let-7b-5p][hsa-let-7a-3p;hsa-let-7b-3p;hsa-let-7g-5p][hsa-let-7g-5p;hsa-miR-129-5p;hsa-miR-181d][hsa-miR-129-5p;hsa-miR-181d][hsa-miR-129-5p;hsa-miR-9-3p]
ARL5B	5	[hsa-miR-1269a;hsa-miR-503][hsa-miR-16-5p;hsa-miR-218-5p][hsa-miR-16-5p;hsa-miR-577][hsa-miR-425-5p;hsa-miR-577][hsa-miR-512-3p;hsa-miR-577]
ARL6	2	[hsa-miR-340-5p;hsa-miR-502-5p;hsa-miR-628-5p][hsa-miR-502-5p;hsa-miR-628-5p]
ARL6IP1	3	[hsa-miR-1247-5p;hsa-miR-328][hsa-miR-148a-3p;hsa-miR-449b-3p][hsa-miR-328;hsa-miR-543]
ARL6IP5	6	[hsa-miR-181a-2-3p;hsa-miR-3692-3p;hsa-miR-93-3p][hsa-miR-181a-2-3p;hsa-miR-495;hsa-miR-93-3p][hsa-miR-181a-2-3p;hsa-miR-93-3p][hsa-miR-194-5p;hsa-miR-93-3p][hsa-miR-3613-3p;hsa-miR-495;hsa-miR-93-3p][hsa-miR-3613-3p;hsa-miR-93-3p]
ARL6IP6	6	[hsa-miR-1248;hsa-miR-30a-5p][hsa-miR-26a-5p;hsa-miR-548a-5p][hsa-miR-26b-5p;hsa-miR-548a-5p][hsa-miR-30a-5p;hsa-miR-548a-5p;hsa-miR-548d-3p][hsa-miR-3605-5p;hsa-miR-577][hsa-miR-548a-5p;hsa-miR-548d-3p]
ARL8A	8	[hsa-miR-146b-5p;hsa-miR-15b-3p][hsa-miR-146b-5p;hsa-miR-15b-3p;hsa-miR-582-3p][hsa-miR-146b-5p;hsa-miR-380-5p;hsa-miR-582-3p][hsa-miR-146b-5p;hsa-miR-548e;hsa-miR-582-3p][hsa-miR-146b-5p;hsa-miR-582-3p][hsa-miR-15b-3p;hsa-miR-19a-3p][hsa-miR-15b-3p;hsa-miR-548d-3p][hsa-miR-224-3p;hsa-miR-582-3p]
ARL8B	6	[hsa-miR-1251;hsa-miR-1262;hsa-miR-376c][hsa-miR-1262;hsa-miR-2278;hsa-miR-376c][hsa-miR-1262;hsa-miR-376c][hsa-miR-135b-3p;hsa-miR-193b-5p][hsa-miR-135b-3p;hsa-miR-193b-5p;hsa-miR-30c-5p][hsa-miR-148a-3p;hsa-miR-452-3p;hsa-miR-548t-5p]
ARMC1	6	[hsa-miR-124-3p;hsa-miR-148a-5p][hsa-miR-1254;hsa-miR-200c-5p;hsa-miR-30d-3p][hsa-miR-1254;hsa-miR-30d-3p][hsa-miR-148a-5p;hsa-miR-196a-3p;hsa-miR-944][hsa-miR-148a-5p;hsa-miR-25-3p][hsa-miR-30d-3p;hsa-miR-323b-3p]
ARMC5	8	[hsa-miR-1286;hsa-miR-155-3p][hsa-miR-1286;hsa-miR-155-3p;hsa-miR-214-3p][hsa-miR-15b-5p;hsa-miR-195-5p;hsa-miR-424-5p][hsa-miR-15b-5p;hsa-miR-216a][hsa-miR-15b-5p;hsa-miR-22-3p;hsa-miR-500b][hsa-miR-15b-5p;hsa-miR-424-5p][hsa-miR-15b-5p;hsa-miR-424-5p;hsa-miR-519e-3p][hsa-miR-15b-5p;hsa-miR-500b]
ARMC8	7	[hsa-let-7a-3p;hsa-let-7g-5p][hsa-let-7a-3p;hsa-let-7g-5p;hsa-miR-129-5p][hsa-let-7a-3p;hsa-miR-181a-5p][hsa-let-7a-3p;hsa-miR-181a-5p;hsa-miR-548e][hsa-let-7a-3p;hsa-miR-34c-5p][hsa-miR-197-3p;hsa-miR-508-3p][hsa-miR-2115-3p;hsa-miR-23b-3p]
ARMCX2	6	[hsa-miR-1301;hsa-miR-224-5p;hsa-miR-421][hsa-miR-1301;hsa-miR-26b-5p][hsa-miR-1301;hsa-miR-421][hsa-miR-1301;hsa-miR-421;hsa-miR-499a-3p][hsa-miR-30a-3p;hsa-miR-488-5p][hsa-miR-30a-3p;hsa-miR-488-5p;hsa-miR-9-3p]
ARMCX3	7	[hsa-miR-1245a;hsa-miR-760;hsa-miR-885-3p][hsa-miR-3065-5p;hsa-miR-760;hsa-miR-885-3p][hsa-miR-30e-3p;hsa-miR-548f][hsa-miR-3682-3p;hsa-miR-760;hsa-miR-885-3p][hsa-miR-548f;hsa-miR-760;hsa-miR-885-3p][hsa-miR-664-3p;hsa-miR-760;hsa-miR-885-3p][hsa-miR-760;hsa-miR-885-3p]
ARMCX5	2	[hsa-miR-29b-2-5p;hsa-miR-33a-5p][hsa-miR-29b-2-5p;hsa-miR-33a-5p;hsa-miR-485-5p]
ARNT	5	[hsa-miR-107;hsa-miR-3916][hsa-miR-1224-5p;hsa-miR-450b-5p;hsa-miR-942][hsa-miR-195-3p;hsa-miR-212-3p;hsa-miR-455-3p][hsa-miR-195-3p;hsa-miR-455-3p][hsa-miR-376c;hsa-miR-3942-5p]
ARNT2	6	[hsa-miR-323a-3p;hsa-miR-338-5p;hsa-miR-543][hsa-miR-338-5p;hsa-miR-376b;hsa-miR-543][hsa-miR-338-5p;hsa-miR-543][hsa-miR-338-5p;hsa-miR-543;hsa-miR-590-3p][hsa-miR-338-5p;hsa-miR-590-3p][hsa-miR-466;hsa-miR-543]
ARNTL	5	[hsa-let-7f-1-3p;hsa-miR-153][hsa-miR-150-3p;hsa-miR-92a-3p][hsa-miR-153;hsa-miR-508-5p][hsa-miR-18a-5p;hsa-miR-7-5p][hsa-miR-1;hsa-miR-153]
ARPC1A	9	[hsa-miR-10a-5p;hsa-miR-197-3p;hsa-miR-9-5p][hsa-miR-10b-5p;hsa-miR-197-3p][hsa-miR-10b-5p;hsa-miR-197-3p;hsa-miR-339-5p][hsa-miR-197-3p;hsa-miR-30a-3p][hsa-miR-197-3p;hsa-miR-30a-3p;hsa-miR-511][hsa-miR-197-3p;hsa-miR-30a-3p;hsa-miR-9-5p][hsa-miR-197-3p;hsa-miR-511][hsa-miR-197-3p;hsa-miR-760][hsa-miR-197-3p;hsa-miR-9-5p]
ARPC1B	5	[hsa-miR-127-5p;hsa-miR-152][hsa-miR-152;hsa-miR-34b-5p][hsa-miR-3193;hsa-miR-433;hsa-miR-455-3p][hsa-miR-3193;hsa-miR-455-3p][hsa-miR-34b-5p;hsa-miR-382-5p]
ARPC2	6	[hsa-miR-126-5p;hsa-miR-150-3p][hsa-miR-126-5p;hsa-miR-150-3p;hsa-miR-4306][hsa-miR-150-3p;hsa-miR-31-5p;hsa-miR-767-3p][hsa-miR-199b-3p;hsa-miR-3653][hsa-miR-409-3p;hsa-miR-518a-5p;hsa-miR-99b-3p][hsa-miR-409-3p;hsa-miR-99b-3p]
ARPC3	5	[hsa-miR-155-5p;hsa-miR-548e][hsa-miR-493-5p;hsa-miR-548f;hsa-miR-629-3p][hsa-miR-493-5p;hsa-miR-629-3p][hsa-miR-548e;hsa-miR-548f;hsa-miR-629-3p][hsa-miR-548f;hsa-miR-629-3p]
ARPC4	4	[hsa-miR-155-3p;hsa-miR-18a-5p][hsa-miR-18a-5p;hsa-miR-34b-3p;hsa-miR-582-5p][hsa-miR-18a-5p;hsa-miR-502-3p][hsa-miR-34b-3p;hsa-miR-582-5p]
ARPC5	6	[hsa-miR-15a-5p;hsa-miR-30d-5p][hsa-miR-190a;hsa-miR-3922-3p][hsa-miR-190b;hsa-miR-19b-1-5p][hsa-miR-190b;hsa-miR-30e-5p][hsa-miR-190b;hsa-miR-548y][hsa-miR-3922-3p;hsa-miR-548b-5p]
ARPC5L	7	[hsa-miR-1276;hsa-miR-3910;hsa-miR-942][hsa-miR-1276;hsa-miR-942][hsa-miR-205-3p;hsa-miR-3619-5p;hsa-miR-942][hsa-miR-205-3p;hsa-miR-942][hsa-miR-2115-3p;hsa-miR-335-5p][hsa-miR-2115-3p;hsa-miR-3679-3p][hsa-miR-374b-3p;hsa-miR-3910]
ARPP19	7	[hsa-miR-148b-3p;hsa-miR-577][hsa-miR-195-5p;hsa-miR-196a-5p;hsa-miR-577][hsa-miR-196a-5p;hsa-miR-20a-3p;hsa-miR-577][hsa-miR-196a-5p;hsa-miR-23a-3p;hsa-miR-577][hsa-miR-196a-5p;hsa-miR-3927;hsa-miR-577][hsa-miR-196a-5p;hsa-miR-577][hsa-miR-577;hsa-miR-618]
ARPP21	8	[hsa-miR-101-3p;hsa-miR-128][hsa-miR-106b-5p;hsa-miR-128][hsa-miR-106b-5p;hsa-miR-128;hsa-miR-200b-3p][hsa-miR-106b-5p;hsa-miR-128;hsa-miR-3910][hsa-miR-106b-5p;hsa-miR-128;hsa-miR-629-3p][hsa-miR-128;hsa-miR-23c][hsa-miR-128;hsa-miR-330-3p][hsa-miR-196a-5p;hsa-miR-424-5p]
ARRB1	7	[hsa-miR-22-3p;hsa-miR-379-5p;hsa-miR-505-5p][hsa-miR-22-3p;hsa-miR-505-5p][hsa-miR-22-3p;hsa-miR-505-5p;hsa-miR-7-5p][hsa-miR-22-3p;hsa-miR-505-5p;hsa-miR-744-3p][hsa-miR-379-5p;hsa-miR-505-5p;hsa-miR-744-3p][hsa-miR-505-5p;hsa-miR-7-5p;hsa-miR-744-3p][hsa-miR-505-5p;hsa-miR-744-3p]
ARRB2	6	[hsa-miR-150-5p;hsa-miR-199a-5p][hsa-miR-155-5p;hsa-miR-199a-5p][hsa-miR-196a-3p;hsa-miR-199a-5p;hsa-miR-365a-3p][hsa-miR-196a-3p;hsa-miR-199b-5p;hsa-miR-365a-3p][hsa-miR-199a-5p;hsa-miR-365a-3p][hsa-miR-199b-5p;hsa-miR-365a-3p]
ARRDC3	8	[hsa-miR-3065-5p;hsa-miR-429;hsa-miR-491-3p][hsa-miR-30d-3p;hsa-miR-3945;hsa-miR-429][hsa-miR-30d-3p;hsa-miR-411-5p;hsa-miR-429][hsa-miR-30d-3p;hsa-miR-429][hsa-miR-411-5p;hsa-miR-429;hsa-miR-491-3p][hsa-miR-424-3p;hsa-miR-429][hsa-miR-429;hsa-miR-433;hsa-miR-491-3p][hsa-miR-429;hsa-miR-491-3p]
ARRDC4	7	[hsa-let-7e-5p;hsa-miR-20a-3p][hsa-let-7e-5p;hsa-miR-20a-3p;hsa-miR-548a-5p][hsa-let-7f-5p;hsa-miR-20a-3p;hsa-miR-548a-5p][hsa-miR-125a-5p;hsa-miR-20a-3p][hsa-miR-128;hsa-miR-20a-3p;hsa-miR-548a-5p][hsa-miR-130b-5p;hsa-miR-20a-3p;hsa-miR-548a-5p][hsa-miR-20a-3p;hsa-miR-27a-3p;hsa-miR-548a-5p]
ARSB	4	[hsa-miR-222-5p;hsa-miR-29a-3p][hsa-miR-29b-3p;hsa-miR-488-3p][hsa-miR-29b-3p;hsa-miR-488-3p;hsa-miR-642b-3p][hsa-miR-29c-3p;hsa-miR-488-3p]
ARSJ	6	[hsa-miR-106a-5p;hsa-miR-106b-5p][hsa-miR-106a-5p;hsa-miR-106b-5p;hsa-miR-548j][hsa-miR-181c-5p;hsa-miR-548b-5p;hsa-miR-548y][hsa-miR-181c-5p;hsa-miR-548j][hsa-miR-181c-5p;hsa-miR-548y][hsa-miR-548y;hsa-miR-582-5p]
ARSK	2	[hsa-miR-105-5p;hsa-miR-548e][hsa-miR-548e;hsa-miR-944]
ART3	5	[hsa-let-7a-3p;hsa-miR-450b-5p;hsa-miR-505-3p][hsa-let-7b-3p;hsa-miR-125a-3p;hsa-miR-548s][hsa-let-7b-3p;hsa-miR-548s][hsa-miR-381;hsa-miR-505-3p][hsa-miR-450b-5p;hsa-miR-505-3p]
ARTN	3	[hsa-miR-224-5p;hsa-miR-3925-5p][hsa-miR-224-5p;hsa-miR-3925-5p;hsa-miR-542-5p][hsa-miR-224-5p;hsa-miR-542-5p]
ARV1	1	[hsa-miR-130b-5p;hsa-miR-3150b-3p]
ARVCF	3	[hsa-miR-29a-3p;hsa-miR-29b-3p][hsa-miR-29a-3p;hsa-miR-29b-3p;hsa-miR-545-5p][hsa-miR-29a-3p;hsa-miR-545-5p]
ARX	7	[hsa-miR-148b-5p;hsa-miR-200a-5p][hsa-miR-191-5p;hsa-miR-200a-5p][hsa-miR-1911-5p;hsa-miR-28-3p][hsa-miR-1911-5p;hsa-miR-28-3p;hsa-miR-642b-3p][hsa-miR-28-3p;hsa-miR-3126-3p;hsa-miR-543][hsa-miR-28-3p;hsa-miR-339-3p;hsa-miR-374b-5p][hsa-miR-28-3p;hsa-miR-543]
ASAH2	1	[hsa-miR-320a;hsa-miR-320b]
ASAH2B	1	[hsa-miR-320a;hsa-miR-320b]
ASAP1	4	[hsa-let-7b-5p;hsa-miR-30d-5p][hsa-miR-1271-5p;hsa-miR-3664-5p][hsa-miR-140-3p;hsa-miR-580][hsa-miR-301a-3p;hsa-miR-636]
ASAP2	5	[hsa-miR-200c-3p;hsa-miR-29a-3p][hsa-miR-200c-3p;hsa-miR-29a-3p;hsa-miR-3622a-3p][hsa-miR-200c-3p;hsa-miR-29a-3p;hsa-miR-3685][hsa-miR-200c-3p;hsa-miR-29a-3p;hsa-miR-372][hsa-miR-29a-3p;hsa-miR-450b-5p]
ASB14	7	[hsa-let-7g-5p;hsa-miR-106b-5p;hsa-miR-30a-5p][hsa-miR-106b-5p;hsa-miR-185-5p;hsa-miR-3609][hsa-miR-106b-5p;hsa-miR-30a-5p][hsa-miR-106b-5p;hsa-miR-3609][hsa-miR-30a-5p;hsa-miR-3919][hsa-miR-3919;hsa-miR-423-5p][hsa-miR-3919;hsa-miR-7-5p]
ASB5	1	[hsa-miR-1266;hsa-miR-876-5p]
ASB6	5	[hsa-miR-136-3p;hsa-miR-15a-5p][hsa-miR-136-3p;hsa-miR-15a-5p;hsa-miR-15b-5p][hsa-miR-136-3p;hsa-miR-15a-5p;hsa-miR-195-5p][hsa-miR-136-3p;hsa-miR-15b-5p][hsa-miR-136-3p;hsa-miR-15b-5p;hsa-miR-195-5p]
ASB7	7	[hsa-miR-105-5p;hsa-miR-224-5p;hsa-miR-492][hsa-miR-1246;hsa-miR-22-5p;hsa-miR-9-5p][hsa-miR-125a-5p;hsa-miR-22-5p][hsa-miR-22-5p;hsa-miR-3065-5p;hsa-miR-9-5p][hsa-miR-22-5p;hsa-miR-9-5p][hsa-miR-224-5p;hsa-miR-492][hsa-miR-3938;hsa-miR-590-3p]
ASB8	2	[hsa-miR-223-3p;hsa-miR-452-5p;hsa-miR-548t-5p][hsa-miR-223-3p;hsa-miR-570-3p]
ASB9	2	[hsa-miR-330-3p;hsa-miR-524-3p;hsa-miR-589-3p][hsa-miR-524-3p;hsa-miR-525-3p;hsa-miR-589-3p]
ASCC1	3	[hsa-miR-1257;hsa-miR-148a-5p][hsa-miR-1257;hsa-miR-148a-5p;hsa-miR-183-3p][hsa-miR-1257;hsa-miR-369-3p]
ASCC2	2	[hsa-miR-320d;hsa-miR-590-3p][hsa-miR-3652;hsa-miR-590-3p]
ASCC3	7	[hsa-miR-101-3p;hsa-miR-30a-5p;hsa-miR-30b-5p][hsa-miR-127-5p;hsa-miR-380-5p][hsa-miR-196a-3p;hsa-miR-380-5p;hsa-miR-532-5p][hsa-miR-30a-5p;hsa-miR-30b-5p][hsa-miR-30a-5p;hsa-miR-30b-5p;hsa-miR-30d-5p][hsa-miR-30b-5p;hsa-miR-380-5p;hsa-miR-532-5p][hsa-miR-380-5p;hsa-miR-532-5p]
ASCL1	7	[hsa-let-7g-3p;hsa-miR-212-3p][hsa-let-7g-5p;hsa-miR-375][hsa-let-7g-5p;hsa-miR-375;hsa-miR-548l][hsa-let-7g-5p;hsa-miR-375;hsa-miR-561-3p][hsa-miR-30b-3p;hsa-miR-3654][hsa-miR-375;hsa-miR-493-5p][hsa-miR-375;hsa-miR-493-5p;hsa-miR-548k]
ASF1A	7	[hsa-miR-105-5p;hsa-miR-142-5p][hsa-miR-142-5p;hsa-miR-17-5p][hsa-miR-142-5p;hsa-miR-21-5p][hsa-miR-142-5p;hsa-miR-21-5p;hsa-miR-3126-3p][hsa-miR-142-5p;hsa-miR-21-5p;hsa-miR-3143][hsa-miR-142-5p;hsa-miR-21-5p;hsa-miR-543][hsa-miR-142-5p;hsa-miR-21-5p;hsa-miR-548d-3p]
ASF1B	3	[hsa-miR-3616-5p;hsa-miR-889][hsa-miR-373-3p;hsa-miR-520a-3p;hsa-miR-889][hsa-miR-520a-3p;hsa-miR-889]
ASH1L	7	[hsa-miR-101-3p;hsa-miR-18a-5p;hsa-miR-20b-5p][hsa-miR-148a-3p;hsa-miR-18a-5p;hsa-miR-374c-5p][hsa-miR-18a-5p;hsa-miR-20b-5p][hsa-miR-18a-5p;hsa-miR-374c-5p][hsa-miR-18a-5p;hsa-miR-374c-5p;hsa-miR-934][hsa-miR-214-3p;hsa-miR-33a-3p;hsa-miR-625-5p][hsa-miR-214-3p;hsa-miR-625-5p]
ASH2L	4	[hsa-miR-206;hsa-miR-30c-2-3p;hsa-miR-338-3p][hsa-miR-3065-3p;hsa-miR-30c-2-3p;hsa-miR-338-3p][hsa-miR-3065-3p;hsa-miR-338-3p][hsa-miR-30c-2-3p;hsa-miR-338-3p]
ASIC1	6	[hsa-miR-148a-3p;hsa-miR-152;hsa-miR-96-5p][hsa-miR-148a-3p;hsa-miR-96-5p][hsa-miR-152;hsa-miR-154-3p;hsa-miR-301b][hsa-miR-152;hsa-miR-301b;hsa-miR-3065-3p][hsa-miR-181c-5p;hsa-miR-301b][hsa-miR-2115-3p;hsa-miR-301b]
ASIC2	7	[hsa-let-7b-3p;hsa-miR-21-3p][hsa-miR-1260b;hsa-miR-2355-3p][hsa-miR-1260b;hsa-miR-2355-3p;hsa-miR-548b-3p][hsa-miR-153;hsa-miR-193a-5p][hsa-miR-153;hsa-miR-193a-5p;hsa-miR-548b-3p][hsa-miR-153;hsa-miR-3128][hsa-miR-153;hsa-miR-548b-3p]
ASIC4	6	[hsa-let-7g-3p;hsa-miR-135b-5p][hsa-let-7g-3p;hsa-miR-135b-5p;hsa-miR-340-5p][hsa-let-7g-3p;hsa-miR-135b-5p;hsa-miR-3605-5p][hsa-let-7g-3p;hsa-miR-135b-5p;hsa-miR-532-5p][hsa-miR-135b-5p;hsa-miR-3605-5p][hsa-miR-3605-5p;hsa-miR-491-3p;hsa-miR-532-5p]
ASMTL	1	[hsa-miR-1301;hsa-miR-3137]
ASNA1	3	[hsa-miR-19a-3p;hsa-miR-19b-3p][hsa-miR-19a-3p;hsa-miR-19b-3p;hsa-miR-361-3p][hsa-miR-19b-3p;hsa-miR-361-3p]
ASPA	2	[hsa-miR-218-5p;hsa-miR-409-3p;hsa-miR-506-3p][hsa-miR-409-3p;hsa-miR-506-3p]
ASPH	7	[hsa-miR-135a-5p;hsa-miR-142-3p][hsa-miR-142-3p;hsa-miR-183-5p;hsa-miR-585][hsa-miR-142-3p;hsa-miR-187-5p;hsa-miR-585][hsa-miR-142-3p;hsa-miR-545-5p;hsa-miR-585][hsa-miR-1;hsa-miR-142-3p;hsa-miR-585][hsa-miR-25-3p;hsa-miR-548v][hsa-miR-29b-3p;hsa-miR-548v]
ASPHD1	1	[hsa-miR-30a-3p;hsa-miR-30d-3p;hsa-miR-30e-3p]
ASPHD2	4	[hsa-miR-1294;hsa-miR-34c-5p][hsa-miR-30a-3p;hsa-miR-502-3p][hsa-miR-34b-5p;hsa-miR-500a-3p][hsa-miR-500a-3p;hsa-miR-501-3p]
ASPN	7	[hsa-miR-154-3p;hsa-miR-578;hsa-miR-93-5p][hsa-miR-21-5p;hsa-miR-93-5p][hsa-miR-25-3p;hsa-miR-409-3p][hsa-miR-369-3p;hsa-miR-578;hsa-miR-93-5p][hsa-miR-374b-5p;hsa-miR-578;hsa-miR-93-5p][hsa-miR-409-3p;hsa-miR-93-5p][hsa-miR-578;hsa-miR-93-5p]
ASRGL1	4	[hsa-miR-124-3p;hsa-miR-196a-3p;hsa-miR-2115-3p][hsa-miR-196a-3p;hsa-miR-2115-3p][hsa-miR-2115-3p;hsa-miR-3065-5p][hsa-miR-3065-5p;hsa-miR-506-3p]
ASS1	3	[hsa-miR-224-5p;hsa-miR-320b][hsa-miR-3175;hsa-miR-320a][hsa-miR-3175;hsa-miR-520d-5p]
ASTN1	5	[hsa-miR-1271-5p;hsa-miR-19b-1-5p][hsa-miR-1271-5p;hsa-miR-19b-1-5p;hsa-miR-944][hsa-miR-135a-5p;hsa-miR-19b-1-5p;hsa-miR-944][hsa-miR-135a-5p;hsa-miR-944][hsa-miR-141-3p;hsa-miR-544b]
ASTN2	6	[hsa-let-7a-5p;hsa-let-7c;hsa-miR-889][hsa-let-7a-5p;hsa-miR-152;hsa-miR-889][hsa-let-7a-5p;hsa-miR-424-5p;hsa-miR-889][hsa-miR-155-3p;hsa-miR-155-5p][hsa-miR-155-5p;hsa-miR-449b-5p][hsa-miR-409-5p;hsa-miR-889]
ASUN	5	[hsa-miR-130b-3p;hsa-miR-3925-5p][hsa-miR-130b-3p;hsa-miR-877-5p][hsa-miR-130b-3p;hsa-miR-877-5p;hsa-miR-93-5p][hsa-miR-151a-5p;hsa-miR-455-3p;hsa-miR-455-5p][hsa-miR-3163;hsa-miR-548n]
ASXL1	6	[hsa-miR-130a-5p;hsa-miR-140-3p;hsa-miR-9-5p][hsa-miR-130a-5p;hsa-miR-200a-3p][hsa-miR-130a-5p;hsa-miR-30a-5p][hsa-miR-140-3p;hsa-miR-2278;hsa-miR-9-5p][hsa-miR-140-3p;hsa-miR-9-5p][hsa-miR-203;hsa-miR-9-5p]
ASXL2	7	[hsa-let-7a-3p;hsa-let-7f-1-3p;hsa-miR-431-5p][hsa-let-7a-3p;hsa-miR-145-3p;hsa-miR-146a-3p][hsa-let-7a-3p;hsa-miR-146a-3p][hsa-let-7b-3p;hsa-miR-130b-3p][hsa-let-7b-3p;hsa-miR-130b-3p;hsa-miR-146a-3p][hsa-miR-130b-3p;hsa-miR-556-3p][hsa-miR-130b-3p;hsa-miR-625-3p]
ASXL3	3	[hsa-miR-10b-3p;hsa-miR-20a-3p][hsa-miR-10b-3p;hsa-miR-20a-3p;hsa-miR-217][hsa-miR-20a-3p;hsa-miR-509-3-5p]
ASZ1	1	[hsa-miR-3143;hsa-miR-590-3p]
ATAD1	3	[hsa-miR-135b-5p;hsa-miR-374b-3p;hsa-miR-877-3p][hsa-miR-135b-5p;hsa-miR-877-3p][hsa-miR-340-5p;hsa-miR-3662]
ATAD2	7	[hsa-miR-106b-5p;hsa-miR-186-5p][hsa-miR-106b-5p;hsa-miR-493-5p][hsa-miR-106b-5p;hsa-miR-93-5p][hsa-miR-17-5p;hsa-miR-20a-5p;hsa-miR-93-5p][hsa-miR-17-5p;hsa-miR-3662;hsa-miR-93-5p][hsa-miR-17-5p;hsa-miR-93-5p][hsa-miR-3662;hsa-miR-93-5p]
ATAD2B	5	[hsa-let-7e-5p;hsa-let-7f-5p][hsa-miR-1301;hsa-miR-324-5p][hsa-miR-136-5p;hsa-miR-3139][hsa-miR-153;hsa-miR-3139][hsa-miR-153;hsa-miR-3139;hsa-miR-376c]
ATAD5	4	[hsa-let-7a-3p;hsa-miR-3662;hsa-miR-381][hsa-let-7b-3p;hsa-miR-3662;hsa-miR-381][hsa-let-7f-1-3p;hsa-miR-3662;hsa-miR-381][hsa-miR-3662;hsa-miR-381]
ATAT1	6	[hsa-miR-141-3p;hsa-miR-488-3p][hsa-miR-150-5p;hsa-miR-449c-5p;hsa-miR-488-3p][hsa-miR-182-5p;hsa-miR-185-5p;hsa-miR-23a-3p][hsa-miR-185-5p;hsa-miR-23a-3p][hsa-miR-449c-5p;hsa-miR-488-3p][hsa-miR-449c-5p;hsa-miR-488-3p;hsa-miR-570-3p]
ATF1	6	[hsa-miR-18a-5p;hsa-miR-2115-5p;hsa-miR-338-5p][hsa-miR-18a-5p;hsa-miR-449b-5p;hsa-miR-616-5p][hsa-miR-18a-5p;hsa-miR-616-5p][hsa-miR-2115-5p;hsa-miR-548e][hsa-miR-338-5p;hsa-miR-548f;hsa-miR-9-3p][hsa-miR-548f;hsa-miR-9-3p]
ATF2	3	[hsa-miR-222-5p;hsa-miR-374c-5p;hsa-miR-545-5p][hsa-miR-224-5p;hsa-miR-374c-5p;hsa-miR-545-5p][hsa-miR-374c-5p;hsa-miR-545-5p]
ATF3	6	[hsa-miR-103a-2-5p;hsa-miR-125b-5p][hsa-miR-103a-2-5p;hsa-miR-125b-5p;hsa-miR-128][hsa-miR-1258;hsa-miR-3664-5p][hsa-miR-125b-5p;hsa-miR-2115-3p;hsa-miR-3664-5p][hsa-miR-2115-3p;hsa-miR-3664-5p][hsa-miR-3664-5p;hsa-miR-3919]
ATF4	3	[hsa-miR-1283;hsa-miR-32-3p][hsa-miR-1283;hsa-miR-519e-5p][hsa-miR-32-3p;hsa-miR-519e-5p]
ATF6B	4	[hsa-miR-331-3p;hsa-miR-3913-5p;hsa-miR-519c-3p][hsa-miR-372;hsa-miR-3913-5p;hsa-miR-519c-3p][hsa-miR-3913-5p;hsa-miR-519c-3p][hsa-miR-519c-3p;hsa-miR-520e]
ATF7	7	[hsa-miR-107;hsa-miR-153;hsa-miR-221-3p][hsa-miR-107;hsa-miR-221-3p][hsa-miR-107;hsa-miR-221-3p;hsa-miR-320a][hsa-miR-107;hsa-miR-221-3p;hsa-miR-320b][hsa-miR-146a-5p;hsa-miR-708-5p][hsa-miR-506-3p;hsa-miR-589-5p;hsa-miR-9-3p][hsa-miR-589-5p;hsa-miR-9-3p]
ATF7IP	6	[hsa-miR-103a-2-5p;hsa-miR-1323;hsa-miR-340-5p][hsa-miR-124-3p;hsa-miR-876-5p][hsa-miR-1323;hsa-miR-340-5p][hsa-miR-1323;hsa-miR-9-5p][hsa-miR-624-3p;hsa-miR-876-5p;hsa-miR-9-5p][hsa-miR-876-5p;hsa-miR-9-5p]
ATF7IP2	1	[hsa-miR-130a-3p;hsa-miR-4284]
ATG12	6	[hsa-let-7d-5p;hsa-miR-1269a;hsa-miR-30e-5p][hsa-let-7d-5p;hsa-miR-30e-5p][hsa-miR-1269a;hsa-miR-18a-3p][hsa-miR-1269a;hsa-miR-18a-3p;hsa-miR-30b-5p][hsa-miR-1269a;hsa-miR-18a-3p;hsa-miR-30e-5p][hsa-miR-1269a;hsa-miR-18a-3p;hsa-miR-3654]
ATG13	1	[hsa-miR-1248;hsa-miR-3667-3p]
ATG14	6	[hsa-miR-17-5p;hsa-miR-374c-5p;hsa-miR-93-5p][hsa-miR-18a-5p;hsa-miR-30a-3p][hsa-miR-20a-5p;hsa-miR-301a-3p;hsa-miR-93-5p][hsa-miR-20a-5p;hsa-miR-93-5p][hsa-miR-374c-5p;hsa-miR-493-5p][hsa-miR-374c-5p;hsa-miR-93-5p]
ATG16L1	5	[hsa-let-7c;hsa-miR-1271-5p;hsa-miR-301b][hsa-let-7c;hsa-miR-1294][hsa-let-7c;hsa-miR-1294;hsa-miR-19a-3p][hsa-miR-106b-5p;hsa-miR-3176;hsa-miR-96-5p][hsa-miR-106b-5p;hsa-miR-96-5p]
ATG2A	4	[hsa-miR-106b-5p;hsa-miR-17-5p;hsa-miR-20b-5p][hsa-miR-17-5p;hsa-miR-20b-5p][hsa-miR-526b-3p;hsa-miR-541-3p][hsa-miR-526b-3p;hsa-miR-541-3p;hsa-miR-93-5p]
ATG2B	6	[hsa-miR-130b-3p;hsa-miR-142-5p;hsa-miR-301b][hsa-miR-142-5p;hsa-miR-20b-5p;hsa-miR-301b][hsa-miR-142-5p;hsa-miR-301b;hsa-miR-375][hsa-miR-20a-5p;hsa-miR-664-3p][hsa-miR-375;hsa-miR-654-3p;hsa-miR-664-3p][hsa-miR-375;hsa-miR-664-3p]
ATG3	6	[hsa-miR-155-5p;hsa-miR-2115-3p;hsa-miR-3115][hsa-miR-155-5p;hsa-miR-3115][hsa-miR-155-5p;hsa-miR-3115;hsa-miR-877-5p][hsa-miR-26b-5p;hsa-miR-30c-2-3p][hsa-miR-26b-5p;hsa-miR-30c-2-3p;hsa-miR-651][hsa-miR-30c-2-3p;hsa-miR-616-3p]
ATG4A	4	[hsa-miR-125a-5p;hsa-miR-3146][hsa-miR-125a-5p;hsa-miR-3146;hsa-miR-3149][hsa-miR-125b-5p;hsa-miR-675-3p][hsa-miR-3146;hsa-miR-675-3p]
ATG4C	1	[hsa-miR-3611;hsa-miR-758]
ATG4D	5	[hsa-miR-101-3p;hsa-miR-130a-3p;hsa-miR-3121-3p][hsa-miR-1256;hsa-miR-148a-3p][hsa-miR-1301;hsa-miR-19b-3p][hsa-miR-148a-3p;hsa-miR-301a-3p][hsa-miR-199b-5p;hsa-miR-19b-3p]
ATG5	4	[hsa-miR-101-5p;hsa-miR-30d-5p;hsa-miR-610][hsa-miR-105-5p;hsa-miR-194-5p;hsa-miR-532-5p][hsa-miR-30d-5p;hsa-miR-3646;hsa-miR-449b-5p][hsa-miR-30d-5p;hsa-miR-449b-5p;hsa-miR-449c-5p]
ATG7	7	[hsa-miR-106a-5p;hsa-miR-106b-5p;hsa-miR-204-5p][hsa-miR-106b-5p;hsa-miR-146a-5p][hsa-miR-106b-5p;hsa-miR-146a-5p;hsa-miR-337-3p][hsa-miR-106b-5p;hsa-miR-204-5p][hsa-miR-106b-5p;hsa-miR-204-5p;hsa-miR-519c-3p][hsa-miR-106b-5p;hsa-miR-204-5p;hsa-miR-935][hsa-miR-7-5p;hsa-miR-708-3p]
ATG9A	7	[hsa-let-7a-5p;hsa-miR-135b-3p;hsa-miR-18a-5p][hsa-let-7a-5p;hsa-miR-29c-3p;hsa-miR-500b][hsa-let-7i-5p;hsa-miR-29c-3p;hsa-miR-500b][hsa-miR-135b-3p;hsa-miR-18a-5p][hsa-miR-16-5p;hsa-miR-29c-3p;hsa-miR-500b][hsa-miR-29c-3p;hsa-miR-500b][hsa-miR-29c-3p;hsa-miR-500b;hsa-miR-767-5p]
ATG9B	6	[hsa-miR-150-5p;hsa-miR-431-5p;hsa-miR-9-5p][hsa-miR-150-5p;hsa-miR-503][hsa-miR-150-5p;hsa-miR-9-5p][hsa-miR-431-5p;hsa-miR-9-5p][hsa-miR-504;hsa-miR-9-5p][hsa-miR-552;hsa-miR-9-5p]
ATL1	7	[hsa-let-7a-3p;hsa-miR-181c-5p][hsa-let-7b-3p;hsa-miR-181c-5p][hsa-miR-130a-5p;hsa-miR-141-3p][hsa-miR-130a-5p;hsa-miR-501-3p][hsa-miR-154-3p;hsa-miR-181c-5p][hsa-miR-181c-5p;hsa-miR-206;hsa-miR-381][hsa-miR-181c-5p;hsa-miR-381]
ATL2	5	[hsa-let-7a-3p;hsa-miR-2110;hsa-miR-577][hsa-miR-140-3p;hsa-miR-24-3p][hsa-miR-20a-5p;hsa-miR-511][hsa-miR-2110;hsa-miR-577][hsa-miR-29b-2-5p;hsa-miR-455-3p]
ATL3	7	[hsa-let-7i-3p;hsa-miR-20a-5p][hsa-let-7i-3p;hsa-miR-20a-5p;hsa-miR-454-3p][hsa-miR-106b-5p;hsa-miR-130b-3p][hsa-miR-130b-3p;hsa-miR-93-5p][hsa-miR-17-5p;hsa-miR-20a-5p][hsa-miR-18b-5p;hsa-miR-3609][hsa-miR-20a-5p;hsa-miR-520g]
ATMIN	4	[hsa-let-7e-3p;hsa-miR-124-3p][hsa-let-7e-3p;hsa-miR-1304-5p][hsa-miR-200b-3p;hsa-miR-449a;hsa-miR-449b-5p][hsa-miR-449a;hsa-miR-449b-5p]
ATN1	7	[hsa-miR-1277-3p;hsa-miR-22-3p;hsa-miR-92a-1-5p][hsa-miR-132-3p;hsa-miR-3907][hsa-miR-212-3p;hsa-miR-3907][hsa-miR-22-3p;hsa-miR-3145-3p;hsa-miR-92a-1-5p][hsa-miR-22-3p;hsa-miR-589-3p;hsa-miR-92a-1-5p][hsa-miR-22-3p;hsa-miR-92a-1-5p][hsa-miR-3907;hsa-miR-92a-1-5p]
ATOH7	7	[hsa-miR-1224-5p;hsa-miR-146a-3p][hsa-miR-1224-5p;hsa-miR-146a-3p;hsa-miR-340-5p][hsa-miR-1224-5p;hsa-miR-146a-3p;hsa-miR-3662][hsa-miR-1224-5p;hsa-miR-146a-3p;hsa-miR-765][hsa-miR-146a-3p;hsa-miR-340-5p][hsa-miR-146a-3p;hsa-miR-340-5p;hsa-miR-765][hsa-miR-3131;hsa-miR-765]
ATOH8	1	[hsa-miR-9-5p;hsa-miR-96-5p]
ATP10A	6	[hsa-miR-1305;hsa-miR-19a-3p][hsa-miR-137;hsa-miR-16-2-3p;hsa-miR-494][hsa-miR-137;hsa-miR-494][hsa-miR-143-3p;hsa-miR-195-3p;hsa-miR-590-3p][hsa-miR-143-3p;hsa-miR-2116-5p;hsa-miR-590-3p][hsa-miR-143-3p;hsa-miR-590-3p]
ATP10B	5	[hsa-miR-143-3p;hsa-miR-146a-5p;hsa-miR-338-5p][hsa-miR-143-3p;hsa-miR-146a-5p;hsa-miR-653][hsa-miR-146a-5p;hsa-miR-338-5p][hsa-miR-146a-5p;hsa-miR-338-5p;hsa-miR-653][hsa-miR-146a-5p;hsa-miR-653]
ATP10D	4	[hsa-miR-125b-5p;hsa-miR-1270][hsa-miR-125b-5p;hsa-miR-1270;hsa-miR-2355-3p][hsa-miR-125b-5p;hsa-miR-2355-3p;hsa-miR-524-5p][hsa-miR-3140-3p;hsa-miR-524-5p]
ATP11A	5	[hsa-miR-124-3p;hsa-miR-137][hsa-miR-152;hsa-miR-32-5p;hsa-miR-9-3p][hsa-miR-152;hsa-miR-9-3p][hsa-miR-25-3p;hsa-miR-410;hsa-miR-577][hsa-miR-410;hsa-miR-577]
ATP11B	3	[hsa-miR-130a-5p;hsa-miR-23a-3p;hsa-miR-23b-3p][hsa-miR-23a-3p;hsa-miR-23b-3p][hsa-miR-429;hsa-miR-9-3p]
ATP11C	8	[hsa-miR-143-3p;hsa-miR-505-3p][hsa-miR-15b-3p;hsa-miR-429][hsa-miR-17-5p;hsa-miR-20a-5p;hsa-miR-505-3p][hsa-miR-17-5p;hsa-miR-26b-5p;hsa-miR-505-3p][hsa-miR-17-5p;hsa-miR-505-3p][hsa-miR-17-5p;hsa-miR-505-3p;hsa-miR-940][hsa-miR-429;hsa-miR-450b-5p][hsa-miR-505-3p;hsa-miR-93-5p]
ATP12A	5	[hsa-miR-106a-5p;hsa-miR-20b-5p][hsa-miR-106b-5p;hsa-miR-17-5p;hsa-miR-20a-5p][hsa-miR-106b-5p;hsa-miR-20a-5p][hsa-miR-106b-5p;hsa-miR-20a-5p;hsa-miR-93-3p][hsa-miR-20a-5p;hsa-miR-20b-5p;hsa-miR-93-5p]
ATP13A2	1	[hsa-miR-1266;hsa-miR-24-3p]
ATP13A3	7	[hsa-miR-2115-3p;hsa-miR-26b-5p][hsa-miR-26b-5p;hsa-miR-365a-3p][hsa-miR-26b-5p;hsa-miR-545-3p][hsa-miR-301a-3p;hsa-miR-374c-5p][hsa-miR-301a-3p;hsa-miR-374c-5p;hsa-miR-424-5p][hsa-miR-301a-3p;hsa-miR-374c-5p;hsa-miR-520f][hsa-miR-301a-3p;hsa-miR-374c-5p;hsa-miR-573]
ATP1A1	6	[hsa-miR-124-3p;hsa-miR-130b-5p;hsa-miR-506-3p][hsa-miR-130b-5p;hsa-miR-506-3p][hsa-miR-30a-3p;hsa-miR-30d-3p;hsa-miR-508-5p][hsa-miR-30d-3p;hsa-miR-30e-3p][hsa-miR-30d-3p;hsa-miR-508-5p][hsa-miR-506-3p;hsa-miR-508-5p]
ATP1A2	3	[hsa-miR-183-5p;hsa-miR-186-5p;hsa-miR-26a-5p][hsa-miR-186-5p;hsa-miR-26a-5p][hsa-miR-186-5p;hsa-miR-26a-5p;hsa-miR-27a-3p]
ATP1A3	7	[hsa-miR-1296;hsa-miR-181a-2-3p;hsa-miR-361-3p][hsa-miR-181a-2-3p;hsa-miR-1976][hsa-miR-181a-2-3p;hsa-miR-2355-5p][hsa-miR-181a-2-3p;hsa-miR-2355-5p;hsa-miR-3161][hsa-miR-181a-2-3p;hsa-miR-3161;hsa-miR-361-3p][hsa-miR-181a-2-3p;hsa-miR-3194-5p;hsa-miR-361-3p][hsa-miR-181a-2-3p;hsa-miR-361-3p]
ATP1B1	5	[hsa-let-7b-3p;hsa-miR-375][hsa-let-7g-3p;hsa-miR-18a-5p][hsa-miR-141-5p;hsa-miR-18a-5p][hsa-miR-141-5p;hsa-miR-18a-5p;hsa-miR-217][hsa-miR-181b-5p;hsa-miR-935]
ATP1B2	6	[hsa-miR-101-3p;hsa-miR-217][hsa-miR-101-3p;hsa-miR-217;hsa-miR-26a-5p][hsa-miR-101-3p;hsa-miR-217;hsa-miR-767-5p][hsa-miR-101-3p;hsa-miR-508-5p][hsa-miR-217;hsa-miR-26a-5p][hsa-miR-26a-5p;hsa-miR-410]
ATP1B3	3	[hsa-miR-1301;hsa-miR-3934][hsa-miR-140-3p;hsa-miR-335-3p;hsa-miR-519a-5p][hsa-miR-224-5p;hsa-miR-3166]
ATP1B4	2	[hsa-miR-15b-5p;hsa-miR-340-5p;hsa-miR-548l][hsa-miR-548l;hsa-miR-638]
ATP2A1	4	[hsa-miR-1248;hsa-miR-224-5p;hsa-miR-3607-3p][hsa-miR-129-2-3p;hsa-miR-129-5p;hsa-miR-224-5p][hsa-miR-129-5p;hsa-miR-224-5p;hsa-miR-2276][hsa-miR-129-5p;hsa-miR-224-5p;hsa-miR-516b-5p]
ATP2A2	5	[hsa-miR-141-3p;hsa-miR-26b-5p][hsa-miR-148a-3p;hsa-miR-26b-5p][hsa-miR-20b-3p;hsa-miR-26b-5p;hsa-miR-628-5p][hsa-miR-26b-5p;hsa-miR-628-5p][hsa-miR-493-5p;hsa-miR-579]
ATP2B1	7	[hsa-miR-148a-3p;hsa-miR-301a-3p][hsa-miR-219-1-3p;hsa-miR-301a-3p][hsa-miR-26a-2-3p;hsa-miR-301a-3p][hsa-miR-301a-3p;hsa-miR-423-3p][hsa-miR-301a-3p;hsa-miR-423-3p;hsa-miR-99b-3p][hsa-miR-301a-3p;hsa-miR-95][hsa-miR-3125;hsa-miR-429;hsa-miR-520h]
ATP2B2	5	[hsa-miR-16-1-3p;hsa-miR-28-5p;hsa-miR-29a-3p][hsa-miR-20b-5p;hsa-miR-28-5p;hsa-miR-29a-3p][hsa-miR-223-5p;hsa-miR-3927;hsa-miR-653][hsa-miR-28-5p;hsa-miR-3646][hsa-miR-539-5p;hsa-miR-653]
ATP2B3	4	[hsa-miR-135a-5p;hsa-miR-22-3p][hsa-miR-135a-5p;hsa-miR-22-3p;hsa-miR-582-5p][hsa-miR-3126-5p;hsa-miR-383][hsa-miR-3126-5p;hsa-miR-938]
ATP2B4	6	[hsa-let-7a-5p;hsa-miR-1255a][hsa-let-7a-5p;hsa-miR-130b-3p][hsa-let-7c;hsa-let-7g-5p;hsa-miR-148a-3p][hsa-let-7c;hsa-let-7g-5p;hsa-miR-500a-5p][hsa-let-7c;hsa-let-7g-5p;hsa-miR-519a-5p][hsa-miR-27b-3p;hsa-miR-708-3p]
ATP2C1	8	[hsa-let-7b-5p;hsa-miR-519b-3p;hsa-miR-766-3p][hsa-let-7b-5p;hsa-miR-766-3p][hsa-miR-101-3p;hsa-miR-153;hsa-miR-519c-3p][hsa-miR-101-3p;hsa-miR-1910][hsa-miR-101-3p;hsa-miR-340-5p][hsa-miR-101-3p;hsa-miR-488-5p;hsa-miR-519c-3p][hsa-miR-101-3p;hsa-miR-519c-3p][hsa-miR-194-3p;hsa-miR-766-3p]
ATP2C2	6	[hsa-miR-18a-5p;hsa-miR-30a-5p;hsa-miR-30d-5p][hsa-miR-18a-5p;hsa-miR-30d-5p][hsa-miR-18a-5p;hsa-miR-30d-5p;hsa-miR-30e-5p][hsa-miR-18b-5p;hsa-miR-30d-5p;hsa-miR-30e-5p][hsa-miR-30a-5p;hsa-miR-30d-5p][hsa-miR-30d-5p;hsa-miR-30e-5p]
ATP4B	3	[hsa-miR-148b-3p;hsa-miR-152;hsa-miR-934][hsa-miR-148b-3p;hsa-miR-934][hsa-miR-152;hsa-miR-934]
ATP5A1	2	[hsa-miR-335-3p;hsa-miR-493-5p][hsa-miR-493-5p;hsa-miR-548e]
ATP5B	5	[hsa-miR-105-5p;hsa-miR-200c-3p][hsa-miR-200c-3p;hsa-miR-429][hsa-miR-200c-3p;hsa-miR-429;hsa-miR-493-5p][hsa-miR-200c-3p;hsa-miR-429;hsa-miR-875-3p][hsa-miR-200c-3p;hsa-miR-493-5p]
ATP5C1	4	[hsa-miR-188-5p;hsa-miR-222-5p][hsa-miR-188-5p;hsa-miR-29b-1-5p;hsa-miR-545-5p][hsa-miR-222-5p;hsa-miR-29b-1-5p][hsa-miR-222-5p;hsa-miR-3679-5p]
ATP5F1	1	[hsa-miR-193a-3p;hsa-miR-508-5p]
ATP5G1	4	[hsa-miR-1270;hsa-miR-29a-3p][hsa-miR-1270;hsa-miR-3925-5p][hsa-miR-29a-3p;hsa-miR-877-5p][hsa-miR-3065-3p;hsa-miR-3925-5p]
ATP5G2	6	[hsa-miR-101-3p;hsa-miR-375][hsa-miR-125b-5p;hsa-miR-375][hsa-miR-144-3p;hsa-miR-369-3p][hsa-miR-375;hsa-miR-942][hsa-miR-511;hsa-miR-942][hsa-miR-664-3p;hsa-miR-942]
ATP5G3	7	[hsa-miR-128;hsa-miR-203;hsa-miR-889][hsa-miR-129-2-3p;hsa-miR-203;hsa-miR-889][hsa-miR-129-2-3p;hsa-miR-889][hsa-miR-146a-5p;hsa-miR-181d;hsa-miR-452-3p][hsa-miR-181c-5p;hsa-miR-452-3p][hsa-miR-181d;hsa-miR-452-3p][hsa-miR-203;hsa-miR-889]
ATP5L	3	[hsa-miR-141-3p;hsa-miR-200a-3p;hsa-miR-570-3p][hsa-miR-141-3p;hsa-miR-570-3p][hsa-miR-200a-3p;hsa-miR-570-3p]
ATP5O	1	[hsa-miR-671-5p;hsa-miR-875-3p]
ATP5S	4	[hsa-miR-34a-5p;hsa-miR-34c-5p;hsa-miR-449c-5p][hsa-miR-34a-5p;hsa-miR-449c-5p][hsa-miR-34c-5p;hsa-miR-449c-5p][hsa-miR-449b-5p;hsa-miR-449c-5p]
ATP5SL	1	[hsa-miR-34a-5p;hsa-miR-449a]
ATP6AP2	6	[hsa-miR-148a-3p;hsa-miR-148b-3p][hsa-miR-148a-3p;hsa-miR-152][hsa-miR-148a-3p;hsa-miR-152;hsa-miR-15b-3p][hsa-miR-148a-3p;hsa-miR-15b-3p][hsa-miR-148a-3p;hsa-miR-576-5p][hsa-miR-152;hsa-miR-186-5p]
ATP6V0A2	2	[hsa-miR-514b-5p;hsa-miR-548d-3p;hsa-miR-944][hsa-miR-520d-5p;hsa-miR-944]
ATP6V0B	6	[hsa-miR-1915-3p;hsa-miR-205-3p;hsa-miR-766-3p][hsa-miR-1915-3p;hsa-miR-495][hsa-miR-205-3p;hsa-miR-21-3p;hsa-miR-766-3p][hsa-miR-205-3p;hsa-miR-495;hsa-miR-766-3p][hsa-miR-205-3p;hsa-miR-766-3p][hsa-miR-495;hsa-miR-766-3p]
ATP6V0C	5	[hsa-miR-146b-5p;hsa-miR-484;hsa-miR-770-5p][hsa-miR-146b-5p;hsa-miR-770-5p][hsa-miR-296-5p;hsa-miR-484;hsa-miR-492][hsa-miR-30a-5p;hsa-miR-492;hsa-miR-592][hsa-miR-30e-5p;hsa-miR-492]
ATP6V0D2	1	[hsa-miR-30b-3p;hsa-miR-3143]
ATP6V0E1	6	[hsa-miR-106b-5p;hsa-miR-130a-3p][hsa-miR-106b-5p;hsa-miR-519d][hsa-miR-124-3p;hsa-miR-20a-5p][hsa-miR-130b-3p;hsa-miR-185-5p;hsa-miR-3173-3p][hsa-miR-185-5p;hsa-miR-301a-3p;hsa-miR-3173-3p][hsa-miR-18a-5p;hsa-miR-20a-5p]
ATP6V1A	5	[hsa-miR-142-3p;hsa-miR-20a-3p;hsa-miR-508-3p][hsa-miR-203;hsa-miR-320d][hsa-miR-203;hsa-miR-3922-3p][hsa-miR-20a-3p;hsa-miR-3176;hsa-miR-508-3p][hsa-miR-20a-3p;hsa-miR-508-3p]
ATP6V1B2	6	[hsa-miR-125b-2-3p;hsa-miR-25-3p;hsa-miR-92a-3p][hsa-miR-125b-2-3p;hsa-miR-92a-3p][hsa-miR-130a-5p;hsa-miR-23b-3p][hsa-miR-141-3p;hsa-miR-195-5p][hsa-miR-23a-3p;hsa-miR-488-5p][hsa-miR-23b-3p;hsa-miR-338-5p]
ATP6V1C1	7	[hsa-miR-130b-5p;hsa-miR-362-3p;hsa-miR-7-1-3p][hsa-miR-144-3p;hsa-miR-362-3p;hsa-miR-7-1-3p][hsa-miR-144-3p;hsa-miR-7-1-3p][hsa-miR-1976;hsa-miR-3140-3p;hsa-miR-7-1-3p][hsa-miR-3140-3p;hsa-miR-362-3p;hsa-miR-7-1-3p][hsa-miR-3140-3p;hsa-miR-7-1-3p][hsa-miR-362-3p;hsa-miR-7-1-3p]
ATP6V1C2	6	[hsa-miR-135b-5p;hsa-miR-219-2-3p;hsa-miR-3913-5p][hsa-miR-135b-5p;hsa-miR-3189-3p][hsa-miR-188-5p;hsa-miR-192-5p][hsa-miR-188-5p;hsa-miR-192-5p;hsa-miR-30b-3p][hsa-miR-188-5p;hsa-miR-192-5p;hsa-miR-3605-5p][hsa-miR-188-5p;hsa-miR-219-2-3p;hsa-miR-455-3p]
ATP6V1D	5	[hsa-miR-1295a;hsa-miR-3662;hsa-miR-603][hsa-miR-199b-5p;hsa-miR-3662][hsa-miR-199b-5p;hsa-miR-449b-3p][hsa-miR-3662;hsa-miR-449b-3p;hsa-miR-603][hsa-miR-449b-3p;hsa-miR-603]
ATP6V1E1	5	[hsa-miR-130a-5p;hsa-miR-23b-3p;hsa-miR-499a-3p][hsa-miR-23a-3p;hsa-miR-23b-3p][hsa-miR-23a-3p;hsa-miR-23b-3p;hsa-miR-499a-3p][hsa-miR-23a-3p;hsa-miR-23b-3p;hsa-miR-512-3p][hsa-miR-23a-3p;hsa-miR-23c]
ATP6V1G1	6	[hsa-let-7c;hsa-let-7e-5p;hsa-miR-577][hsa-let-7c;hsa-miR-129-2-3p;hsa-miR-577][hsa-let-7c;hsa-miR-155-5p;hsa-miR-577][hsa-let-7c;hsa-miR-335-3p;hsa-miR-577][hsa-let-7c;hsa-miR-577][hsa-miR-32-3p;hsa-miR-577]
ATP6V1G3	5	[hsa-miR-20b-3p;hsa-miR-29b-1-5p][hsa-miR-20b-3p;hsa-miR-29b-1-5p;hsa-miR-876-5p][hsa-miR-20b-3p;hsa-miR-760][hsa-miR-20b-3p;hsa-miR-760;hsa-miR-876-5p][hsa-miR-20b-3p;hsa-miR-876-5p]
ATP6V1H	7	[hsa-miR-122-5p;hsa-miR-20a-3p;hsa-miR-411-3p][hsa-miR-194-5p;hsa-miR-20a-3p;hsa-miR-411-3p][hsa-miR-20a-3p;hsa-miR-379-3p;hsa-miR-411-3p][hsa-miR-20a-3p;hsa-miR-380-3p;hsa-miR-411-3p][hsa-miR-20a-3p;hsa-miR-411-3p][hsa-miR-20a-3p;hsa-miR-411-3p;hsa-miR-525-5p][hsa-miR-411-3p;hsa-miR-525-5p]
ATP7A	6	[hsa-miR-135b-3p;hsa-miR-148b-3p;hsa-miR-500b][hsa-miR-135b-3p;hsa-miR-15b-5p;hsa-miR-29a-3p][hsa-miR-135b-3p;hsa-miR-29a-3p;hsa-miR-29c-3p][hsa-miR-148b-3p;hsa-miR-29b-3p;hsa-miR-500b][hsa-miR-148b-3p;hsa-miR-500b][hsa-miR-16-2-3p;hsa-miR-340-5p]
ATP8A1	5	[hsa-miR-101-3p;hsa-miR-135a-5p;hsa-miR-205-5p][hsa-miR-101-3p;hsa-miR-181b-5p;hsa-miR-205-5p][hsa-miR-101-3p;hsa-miR-3160-3p;hsa-miR-609][hsa-miR-153;hsa-miR-22-3p][hsa-miR-181c-3p;hsa-miR-877-3p]
ATP8A2	5	[hsa-miR-1228-3p;hsa-miR-200a-3p;hsa-miR-377-3p][hsa-miR-1228-3p;hsa-miR-200a-3p;hsa-miR-411-3p][hsa-miR-1228-3p;hsa-miR-200a-3p;hsa-miR-628-5p][hsa-miR-1228-3p;hsa-miR-200a-3p;hsa-miR-93-3p][hsa-miR-1228-3p;hsa-miR-628-5p]
ATP8B1	5	[hsa-miR-30a-5p;hsa-miR-32-5p;hsa-miR-377-3p][hsa-miR-30e-5p;hsa-miR-514a-3p][hsa-miR-32-5p;hsa-miR-377-3p][hsa-miR-377-3p;hsa-miR-450a-5p;hsa-miR-514a-3p][hsa-miR-377-3p;hsa-miR-514a-3p]
ATP8B2	6	[hsa-miR-106a-5p;hsa-miR-93-5p][hsa-miR-181c-5p;hsa-miR-30d-5p;hsa-miR-93-5p][hsa-miR-30d-5p;hsa-miR-374a-5p;hsa-miR-93-5p][hsa-miR-30d-5p;hsa-miR-93-5p][hsa-miR-33a-3p;hsa-miR-629-5p][hsa-miR-374a-5p;hsa-miR-410;hsa-miR-450b-5p]
ATP8B4	3	[hsa-let-7a-5p;hsa-miR-573][hsa-let-7a-5p;hsa-miR-98][hsa-let-7c;hsa-miR-335-3p]
ATP9A	5	[hsa-miR-1297;hsa-miR-642b-3p;hsa-miR-96-3p][hsa-miR-1297;hsa-miR-96-3p][hsa-miR-26a-5p;hsa-miR-642b-3p][hsa-miR-374a-3p;hsa-miR-642b-3p][hsa-miR-642b-3p;hsa-miR-96-3p]
ATPAF1	5	[hsa-let-7d-5p;hsa-miR-27a-3p;hsa-miR-3150b-3p][hsa-let-7i-5p;hsa-miR-328;hsa-miR-378a-5p][hsa-miR-27a-3p;hsa-miR-3150b-3p][hsa-miR-27a-3p;hsa-miR-3150b-3p;hsa-miR-98][hsa-miR-328;hsa-miR-378a-5p]
ATPBD4	8	[hsa-miR-124-5p;hsa-miR-126-5p][hsa-miR-124-5p;hsa-miR-3157-5p][hsa-miR-124-5p;hsa-miR-491-3p][hsa-miR-19b-1-5p;hsa-miR-203;hsa-miR-224-3p][hsa-miR-19b-2-5p;hsa-miR-203;hsa-miR-224-3p][hsa-miR-203;hsa-miR-224-3p][hsa-miR-203;hsa-miR-224-3p;hsa-miR-508-3p][hsa-miR-203;hsa-miR-224-3p;hsa-miR-520h]
ATPIF1	5	[hsa-miR-1305;hsa-miR-22-3p][hsa-miR-135b-5p;hsa-miR-3166][hsa-miR-135b-5p;hsa-miR-335-3p][hsa-miR-330-3p;hsa-miR-574-3p;hsa-miR-652-3p][hsa-miR-574-3p;hsa-miR-652-3p]
ATRN	6	[hsa-miR-200a-3p;hsa-miR-379-3p][hsa-miR-200a-3p;hsa-miR-379-3p;hsa-miR-452-3p][hsa-miR-23a-3p;hsa-miR-378a-3p;hsa-miR-590-3p][hsa-miR-23c;hsa-miR-590-3p][hsa-miR-29c-3p;hsa-miR-378b][hsa-miR-411-3p;hsa-miR-590-3p]
ATRNL1	7	[hsa-miR-196b-5p;hsa-miR-3187-3p;hsa-miR-452-3p][hsa-miR-196b-5p;hsa-miR-452-3p][hsa-miR-202-5p;hsa-miR-30b-5p;hsa-miR-452-3p][hsa-miR-30b-5p;hsa-miR-3622b-5p][hsa-miR-30b-5p;hsa-miR-525-5p][hsa-miR-30b-5p;hsa-miR-525-5p;hsa-miR-675-3p][hsa-miR-452-3p;hsa-miR-891b]
ATRX	7	[hsa-let-7a-3p;hsa-miR-141-5p][hsa-let-7b-3p;hsa-miR-130b-3p][hsa-let-7b-3p;hsa-miR-130b-3p;hsa-miR-27a-3p][hsa-let-7b-3p;hsa-miR-130b-3p;hsa-miR-320b][hsa-miR-130b-3p;hsa-miR-625-3p][hsa-miR-320a;hsa-miR-429][hsa-miR-429;hsa-miR-9-3p]
ATXN1	6	[hsa-miR-130a-3p;hsa-miR-18a-5p][hsa-miR-130a-3p;hsa-miR-18a-5p;hsa-miR-4306][hsa-miR-141-3p;hsa-miR-181b-5p;hsa-miR-18a-5p][hsa-miR-181b-5p;hsa-miR-18a-5p][hsa-miR-181b-5p;hsa-miR-18a-5p;hsa-miR-7-5p][hsa-miR-20b-5p;hsa-miR-625-5p]
ATXN10	5	[hsa-miR-125b-2-3p;hsa-miR-181a-2-3p;hsa-miR-23a-5p][hsa-miR-125b-2-3p;hsa-miR-23a-5p;hsa-miR-3127-5p][hsa-miR-125b-2-3p;hsa-miR-23a-5p;hsa-miR-34b-3p][hsa-miR-125b-2-3p;hsa-miR-23a-5p;hsa-miR-627][hsa-miR-125b-2-3p;hsa-miR-516a-5p]
ATXN1L	7	[hsa-miR-101-3p;hsa-miR-135b-5p][hsa-miR-101-3p;hsa-miR-135b-5p;hsa-miR-19a-3p][hsa-miR-101-3p;hsa-miR-135b-5p;hsa-miR-3145-3p][hsa-miR-101-3p;hsa-miR-135b-5p;hsa-miR-335-5p][hsa-miR-101-3p;hsa-miR-3145-3p][hsa-miR-101-3p;hsa-miR-3660][hsa-miR-18b-5p;hsa-miR-29c-3p]
ATXN2	7	[hsa-miR-15b-3p;hsa-miR-190b;hsa-miR-379-5p][hsa-miR-190b;hsa-miR-2115-5p;hsa-miR-379-5p][hsa-miR-190b;hsa-miR-34b-3p][hsa-miR-190b;hsa-miR-3651;hsa-miR-550a-5p][hsa-miR-190b;hsa-miR-550a-5p][hsa-miR-190b;hsa-miR-9-5p][hsa-miR-223-3p;hsa-miR-379-5p]
ATXN2L	5	[hsa-miR-184;hsa-miR-3176;hsa-miR-552][hsa-miR-20a-5p;hsa-miR-224-5p][hsa-miR-20a-5p;hsa-miR-224-5p;hsa-miR-3190-5p][hsa-miR-20a-5p;hsa-miR-92a-2-5p][hsa-miR-3176;hsa-miR-668]
ATXN3	7	[hsa-let-7a-3p;hsa-let-7f-1-3p][hsa-let-7a-3p;hsa-let-7f-1-3p;hsa-miR-29c-3p][hsa-let-7a-3p;hsa-let-7f-1-3p;hsa-miR-374a-3p][hsa-let-7a-3p;hsa-let-7f-1-3p;hsa-miR-9-5p][hsa-let-7f-2-3p;hsa-miR-527][hsa-miR-29a-3p;hsa-miR-518a-5p][hsa-miR-29a-3p;hsa-miR-518a-5p;hsa-miR-577]
ATXN7	7	[hsa-miR-10b-5p;hsa-miR-335-3p;hsa-miR-374b-5p][hsa-miR-142-5p;hsa-miR-664-3p][hsa-miR-153;hsa-miR-335-3p;hsa-miR-374b-5p][hsa-miR-186-5p;hsa-miR-3653][hsa-miR-2115-3p;hsa-miR-374b-5p][hsa-miR-335-3p;hsa-miR-374b-5p][hsa-miR-34c-5p;hsa-miR-664-3p]
ATXN7L1	8	[hsa-miR-106b-5p;hsa-miR-199b-3p;hsa-miR-3136-5p][hsa-miR-106b-5p;hsa-miR-3136-5p][hsa-miR-1283;hsa-miR-3136-5p][hsa-miR-130b-3p;hsa-miR-3136-5p][hsa-miR-148a-3p;hsa-miR-3136-5p][hsa-miR-19a-3p;hsa-miR-22-5p;hsa-miR-3136-5p][hsa-miR-22-5p;hsa-miR-3136-5p][hsa-miR-26a-2-3p;hsa-miR-3136-5p]
ATXN7L2	8	[hsa-let-7d-5p;hsa-miR-1276;hsa-miR-505-5p][hsa-let-7d-5p;hsa-miR-505-5p][hsa-let-7d-5p;hsa-miR-505-5p;hsa-miR-589-3p][hsa-let-7d-5p;hsa-miR-505-5p;hsa-miR-625-5p][hsa-miR-1234;hsa-miR-15a-5p;hsa-miR-505-5p][hsa-miR-15a-5p;hsa-miR-505-5p][hsa-miR-16-5p;hsa-miR-28-5p][hsa-miR-16-5p;hsa-miR-548b-5p]
ATXN7L3	5	[hsa-miR-18a-5p;hsa-miR-22-3p][hsa-miR-18b-5p;hsa-miR-195-5p][hsa-miR-195-5p;hsa-miR-23b-3p;hsa-miR-3613-3p][hsa-miR-22-3p;hsa-miR-30b-5p][hsa-miR-23b-3p;hsa-miR-3613-3p]
ATXN7L3B	6	[hsa-let-7e-5p;hsa-let-7g-5p;hsa-miR-21-5p][hsa-let-7e-5p;hsa-let-7i-5p;hsa-miR-21-5p][hsa-let-7e-5p;hsa-miR-34b-5p][hsa-let-7g-5p;hsa-miR-7-5p][hsa-miR-3065-3p;hsa-miR-7-5p][hsa-miR-34a-5p;hsa-miR-7-5p]
AUH	7	[hsa-miR-133a;hsa-miR-19a-3p;hsa-miR-23a-3p][hsa-miR-19a-3p;hsa-miR-19b-3p][hsa-miR-19a-3p;hsa-miR-23a-3p][hsa-miR-19a-3p;hsa-miR-23c;hsa-miR-410][hsa-miR-19a-3p;hsa-miR-410][hsa-miR-19a-3p;hsa-miR-590-3p][hsa-miR-19a-3p;hsa-miR-590-3p;hsa-miR-944]
AUP1	7	[hsa-miR-1249;hsa-miR-1262;hsa-miR-205-5p][hsa-miR-1262;hsa-miR-130b-5p;hsa-miR-205-5p][hsa-miR-1262;hsa-miR-205-5p][hsa-miR-1262;hsa-miR-205-5p;hsa-miR-497-3p][hsa-miR-1262;hsa-miR-205-5p;hsa-miR-660-5p][hsa-miR-185-3p;hsa-miR-18a-3p][hsa-miR-185-3p;hsa-miR-18a-3p;hsa-miR-211-5p]
AURKA	4	[hsa-miR-222-5p;hsa-miR-3616-3p;hsa-miR-485-3p][hsa-miR-3616-3p;hsa-miR-485-3p][hsa-miR-3616-3p;hsa-miR-485-3p;hsa-miR-93-3p][hsa-miR-485-3p;hsa-miR-93-3p]
AURKB	5	[hsa-let-7b-5p;hsa-miR-3927;hsa-miR-98][hsa-let-7b-5p;hsa-miR-939][hsa-let-7b-5p;hsa-miR-98][hsa-miR-30b-3p;hsa-miR-939][hsa-miR-30b-3p;hsa-miR-939;hsa-miR-98]
AUTS2	7	[hsa-miR-127-5p;hsa-miR-200b-3p;hsa-miR-381][hsa-miR-130b-5p;hsa-miR-381][hsa-miR-23a-3p;hsa-miR-342-3p][hsa-miR-23a-3p;hsa-miR-342-3p;hsa-miR-548b-5p][hsa-miR-23a-3p;hsa-miR-342-3p;hsa-miR-93-5p][hsa-miR-3156-5p;hsa-miR-381][hsa-miR-381;hsa-miR-616-5p]
AVIL	2	[hsa-miR-3609;hsa-miR-548t-5p][hsa-miR-520f;hsa-miR-548t-5p]
AVL9	4	[hsa-miR-24-3p;hsa-miR-30a-5p][hsa-miR-24-3p;hsa-miR-30a-5p;hsa-miR-30c-5p][hsa-miR-24-3p;hsa-miR-30a-5p;hsa-miR-30e-5p][hsa-miR-24-3p;hsa-miR-30c-5p]
AVPI1	3	[hsa-miR-182-5p;hsa-miR-31-5p][hsa-miR-182-5p;hsa-miR-31-5p;hsa-miR-455-3p][hsa-miR-31-5p;hsa-miR-455-3p]
AVPR2	7	[hsa-miR-1197;hsa-miR-28-5p;hsa-miR-485-5p][hsa-miR-1197;hsa-miR-485-5p][hsa-miR-1304-5p;hsa-miR-28-5p;hsa-miR-485-5p][hsa-miR-153;hsa-miR-28-5p;hsa-miR-485-5p][hsa-miR-153;hsa-miR-485-5p][hsa-miR-153;hsa-miR-485-5p;hsa-miR-548s][hsa-miR-28-5p;hsa-miR-485-5p]
AWAT2	4	[hsa-miR-1276;hsa-miR-2115-3p][hsa-miR-1276;hsa-miR-2115-3p;hsa-miR-361-5p][hsa-miR-1276;hsa-miR-361-5p][hsa-miR-2115-3p;hsa-miR-361-5p]
AXIN1	4	[hsa-miR-125b-5p;hsa-miR-126-5p][hsa-miR-146a-5p;hsa-miR-203;hsa-miR-205-3p][hsa-miR-203;hsa-miR-205-3p][hsa-miR-203;hsa-miR-506-3p]
AXIN2	8	[hsa-miR-101-3p;hsa-miR-1250;hsa-miR-18a-5p][hsa-miR-101-3p;hsa-miR-18a-5p][hsa-miR-101-3p;hsa-miR-18a-5p;hsa-miR-454-5p][hsa-miR-101-3p;hsa-miR-18a-5p;hsa-miR-493-5p][hsa-miR-103a-3p;hsa-miR-1269a][hsa-miR-103a-3p;hsa-miR-1269a;hsa-miR-338-5p][hsa-miR-103a-3p;hsa-miR-18a-5p][hsa-miR-103a-3p;hsa-miR-18a-5p;hsa-miR-34a-5p]
AXL	7	[hsa-miR-2355-5p;hsa-miR-9-5p][hsa-miR-33a-5p;hsa-miR-33b-5p;hsa-miR-519a-5p][hsa-miR-33a-5p;hsa-miR-449b-5p][hsa-miR-33a-5p;hsa-miR-449b-5p;hsa-miR-519a-5p][hsa-miR-33a-5p;hsa-miR-519a-5p][hsa-miR-34c-5p;hsa-miR-9-5p][hsa-miR-9-5p;hsa-miR-92a-3p]
AZI2	5	[hsa-miR-182-5p;hsa-miR-338-3p][hsa-miR-2113;hsa-miR-556-3p][hsa-miR-29b-2-5p;hsa-miR-331-3p][hsa-miR-29b-2-5p;hsa-miR-331-3p;hsa-miR-338-3p][hsa-miR-29b-2-5p;hsa-miR-9-5p]
AZIN1	6	[hsa-miR-137;hsa-miR-30a-5p][hsa-miR-137;hsa-miR-30a-5p;hsa-miR-513b][hsa-miR-2110;hsa-miR-224-3p;hsa-miR-520a-3p][hsa-miR-2110;hsa-miR-224-3p;hsa-miR-625-3p][hsa-miR-30a-5p;hsa-miR-30e-5p;hsa-miR-92a-3p][hsa-miR-30a-5p;hsa-miR-92a-3p]
B2M	3	[hsa-miR-361-3p;hsa-miR-3679-3p][hsa-miR-361-3p;hsa-miR-3679-3p;hsa-miR-7-2-3p][hsa-miR-361-3p;hsa-miR-7-2-3p]
B3GALNT2	6	[hsa-miR-101-5p;hsa-miR-1270;hsa-miR-577][hsa-miR-101-5p;hsa-miR-140-3p;hsa-miR-577][hsa-miR-101-5p;hsa-miR-320d;hsa-miR-577][hsa-miR-18a-3p;hsa-miR-19b-3p][hsa-miR-19b-3p;hsa-miR-548d-3p;hsa-miR-577][hsa-miR-320d;hsa-miR-577]
B3GALT1	6	[hsa-let-7a-3p;hsa-miR-1271-5p][hsa-miR-1271-5p;hsa-miR-182-5p;hsa-miR-3199][hsa-miR-1271-5p;hsa-miR-3199][hsa-miR-1271-5p;hsa-miR-3199;hsa-miR-378a-5p][hsa-miR-1271-5p;hsa-miR-3199;hsa-miR-432-5p][hsa-miR-1271-5p;hsa-miR-371a-5p]
B3GALT2	6	[hsa-miR-137;hsa-miR-20a-5p;hsa-miR-33b-5p][hsa-miR-137;hsa-miR-301a-3p;hsa-miR-33b-5p][hsa-miR-137;hsa-miR-328;hsa-miR-33b-5p][hsa-miR-137;hsa-miR-33b-5p;hsa-miR-520d-5p][hsa-miR-137;hsa-miR-33b-5p;hsa-miR-92a-3p][hsa-miR-182-5p;hsa-miR-195-3p]
B3GALTL	3	[hsa-miR-1197;hsa-miR-1251][hsa-miR-1251;hsa-miR-491-3p;hsa-miR-625-3p][hsa-miR-491-3p;hsa-miR-625-3p]
B3GAT1	7	[hsa-miR-30a-5p;hsa-miR-3150b-3p][hsa-miR-30d-5p;hsa-miR-3150b-3p][hsa-miR-30e-5p;hsa-miR-3150b-3p][hsa-miR-30e-5p;hsa-miR-3150b-3p;hsa-miR-488-3p][hsa-miR-30e-5p;hsa-miR-3150b-3p;hsa-miR-548f][hsa-miR-3150b-3p;hsa-miR-3607-3p;hsa-miR-488-3p][hsa-miR-3150b-3p;hsa-miR-488-3p]
B3GAT3	4	[hsa-miR-105-5p;hsa-miR-3940-3p;hsa-miR-3943][hsa-miR-105-5p;hsa-miR-516b-5p][hsa-miR-3940-3p;hsa-miR-3943][hsa-miR-3943;hsa-miR-516b-5p]
B3GNT1	7	[hsa-let-7c;hsa-miR-199a-5p;hsa-miR-24-3p][hsa-let-7c;hsa-miR-21-3p;hsa-miR-24-3p][hsa-let-7d-5p;hsa-miR-202-3p;hsa-miR-24-3p][hsa-miR-199a-5p;hsa-miR-202-3p;hsa-miR-24-3p][hsa-miR-202-3p;hsa-miR-21-3p;hsa-miR-24-3p][hsa-miR-202-3p;hsa-miR-24-3p][hsa-miR-21-3p;hsa-miR-24-3p]
B3GNT2	5	[hsa-miR-107;hsa-miR-429][hsa-miR-183-5p;hsa-miR-30c-2-3p;hsa-miR-3653][hsa-miR-19b-1-5p;hsa-miR-30c-2-3p][hsa-miR-19b-1-5p;hsa-miR-30c-2-3p;hsa-miR-3653][hsa-miR-19b-1-5p;hsa-miR-30c-2-3p;hsa-miR-543]
B3GNT5	6	[hsa-miR-17-3p;hsa-miR-29c-3p][hsa-miR-17-3p;hsa-miR-29c-3p;hsa-miR-30a-5p][hsa-miR-17-3p;hsa-miR-29c-3p;hsa-miR-374c-5p][hsa-miR-29c-3p;hsa-miR-511][hsa-miR-29c-3p;hsa-miR-511;hsa-miR-576-5p][hsa-miR-519a-5p;hsa-miR-570-3p]
B3GNT7	4	[hsa-let-7c;hsa-miR-27b-3p;hsa-miR-548f][hsa-let-7d-5p;hsa-miR-539-5p;hsa-miR-548f][hsa-miR-27b-3p;hsa-miR-548f][hsa-miR-539-5p;hsa-miR-548f]
B3GNT9	6	[hsa-let-7g-3p;hsa-miR-135b-3p;hsa-miR-335-3p][hsa-miR-10a-5p;hsa-miR-30a-5p;hsa-miR-32-3p][hsa-miR-10a-5p;hsa-miR-32-3p;hsa-miR-335-3p][hsa-miR-135b-3p;hsa-miR-3149;hsa-miR-335-3p][hsa-miR-135b-3p;hsa-miR-335-3p][hsa-miR-3144-5p;hsa-miR-335-3p]
B4GALNT1	8	[hsa-miR-1271-5p;hsa-miR-135a-5p;hsa-miR-9-5p][hsa-miR-1285-3p;hsa-miR-9-5p][hsa-miR-135a-5p;hsa-miR-9-5p][hsa-miR-135a-5p;hsa-miR-9-5p;hsa-miR-96-5p][hsa-miR-135b-5p;hsa-miR-2114-5p;hsa-miR-9-5p][hsa-miR-135b-5p;hsa-miR-9-5p][hsa-miR-182-5p;hsa-miR-3680-3p][hsa-miR-597;hsa-miR-9-5p]
B4GALNT4	3	[hsa-miR-136-3p;hsa-miR-27b-3p;hsa-miR-589-3p][hsa-miR-27a-3p;hsa-miR-27b-3p][hsa-miR-513a-5p;hsa-miR-570-3p;hsa-miR-579]
B4GALT1	6	[hsa-miR-1256;hsa-miR-181c-5p;hsa-miR-26a-5p][hsa-miR-1256;hsa-miR-183-5p][hsa-miR-1256;hsa-miR-183-5p;hsa-miR-376c][hsa-miR-181c-5p;hsa-miR-26a-5p][hsa-miR-181c-5p;hsa-miR-26a-5p;hsa-miR-374b-3p][hsa-miR-26b-5p;hsa-miR-424-5p]
B4GALT2	7	[hsa-miR-1304-5p;hsa-miR-186-3p;hsa-miR-642a-5p][hsa-miR-1304-5p;hsa-miR-19a-3p;hsa-miR-642a-5p][hsa-miR-1304-5p;hsa-miR-34b-5p;hsa-miR-642a-5p][hsa-miR-1304-5p;hsa-miR-519a-5p;hsa-miR-642a-5p][hsa-miR-1304-5p;hsa-miR-642a-5p][hsa-miR-130a-3p;hsa-miR-642a-5p][hsa-miR-520g;hsa-miR-642a-5p]
B4GALT3	5	[hsa-miR-128;hsa-miR-27a-3p][hsa-miR-128;hsa-miR-27a-3p;hsa-miR-338-3p][hsa-miR-128;hsa-miR-27a-3p;hsa-miR-605][hsa-miR-27b-3p;hsa-miR-423-5p][hsa-miR-3150b-3p;hsa-miR-455-3p]
B4GALT4	8	[hsa-let-7a-2-3p;hsa-miR-26a-5p][hsa-let-7a-2-3p;hsa-miR-26a-5p;hsa-miR-26b-5p][hsa-let-7a-2-3p;hsa-miR-26a-5p;hsa-miR-92a-3p][hsa-let-7a-2-3p;hsa-miR-92a-3p][hsa-miR-126-3p;hsa-miR-26a-5p;hsa-miR-92a-3p][hsa-miR-137;hsa-miR-26a-5p][hsa-miR-26a-5p;hsa-miR-26b-5p;hsa-miR-92a-3p][hsa-miR-26a-5p;hsa-miR-92a-3p]
B4GALT5	4	[hsa-miR-137;hsa-miR-301b][hsa-miR-223-5p;hsa-miR-30d-3p;hsa-miR-424-3p][hsa-miR-223-5p;hsa-miR-424-3p;hsa-miR-454-3p][hsa-miR-454-3p;hsa-miR-624-3p]
B4GALT6	7	[hsa-miR-1179;hsa-miR-149-5p][hsa-miR-1179;hsa-miR-3662;hsa-miR-519c-3p][hsa-miR-1179;hsa-miR-519c-3p][hsa-miR-148a-3p;hsa-miR-212-3p][hsa-miR-148a-3p;hsa-miR-212-3p;hsa-miR-32-3p][hsa-miR-200b-3p;hsa-miR-212-3p][hsa-miR-212-3p;hsa-miR-584-5p]
BAALC	3	[hsa-miR-1267;hsa-miR-2114-5p;hsa-miR-629-5p][hsa-miR-2114-5p;hsa-miR-371a-5p;hsa-miR-629-5p][hsa-miR-514a-3p;hsa-miR-629-5p]
BAAT	7	[hsa-let-7a-2-3p;hsa-miR-3164;hsa-miR-92a-3p][hsa-miR-1270;hsa-miR-411-3p;hsa-miR-92a-3p][hsa-miR-1270;hsa-miR-92a-3p][hsa-miR-193a-5p;hsa-miR-431-5p;hsa-miR-92a-3p][hsa-miR-193a-5p;hsa-miR-548k;hsa-miR-92a-3p][hsa-miR-193a-5p;hsa-miR-92a-3p][hsa-miR-3156-5p;hsa-miR-3164;hsa-miR-92a-3p]
BACE1	6	[hsa-miR-16-5p;hsa-miR-2114-5p][hsa-miR-16-5p;hsa-miR-382-5p][hsa-miR-16-5p;hsa-miR-382-5p;hsa-miR-497-5p][hsa-miR-19b-1-5p;hsa-miR-342-5p][hsa-miR-342-5p;hsa-miR-369-3p;hsa-miR-3922-3p][hsa-miR-342-5p;hsa-miR-382-5p]
BACE2	7	[hsa-let-7b-5p;hsa-miR-196b-5p;hsa-miR-574-3p][hsa-let-7b-5p;hsa-miR-196b-5p;hsa-miR-654-3p][hsa-let-7b-5p;hsa-miR-3173-3p;hsa-miR-574-3p][hsa-let-7b-5p;hsa-miR-574-3p][hsa-let-7b-5p;hsa-miR-654-3p][hsa-miR-16-5p;hsa-miR-3117-3p][hsa-miR-3117-3p;hsa-miR-664-3p]
BACH1	6	[hsa-let-7f-5p;hsa-let-7i-5p;hsa-miR-30b-5p][hsa-let-7i-5p;hsa-miR-30b-5p][hsa-let-7i-5p;hsa-miR-30b-5p;hsa-miR-3187-3p][hsa-miR-137;hsa-miR-155-5p][hsa-miR-137;hsa-miR-30d-5p][hsa-miR-137;hsa-miR-643]
BACH2	6	[hsa-let-7c;hsa-miR-150-5p;hsa-miR-323a-3p][hsa-let-7c;hsa-miR-150-5p;hsa-miR-934][hsa-miR-150-5p;hsa-miR-33a-3p][hsa-miR-16-5p;hsa-miR-29a-3p;hsa-miR-944][hsa-miR-16-5p;hsa-miR-944][hsa-miR-186-5p;hsa-miR-374a-5p]
BAG1	4	[hsa-miR-146a-5p;hsa-miR-31-5p][hsa-miR-146a-5p;hsa-miR-31-5p;hsa-miR-335-3p][hsa-miR-146a-5p;hsa-miR-31-5p;hsa-miR-580][hsa-miR-146a-5p;hsa-miR-580]
BAG2	7	[hsa-miR-101-5p;hsa-miR-452-3p][hsa-miR-101-5p;hsa-miR-452-3p;hsa-miR-577][hsa-miR-101-5p;hsa-miR-577][hsa-miR-140-5p;hsa-miR-141-3p;hsa-miR-200a-3p][hsa-miR-140-5p;hsa-miR-200a-3p][hsa-miR-223-3p;hsa-miR-577][hsa-miR-577;hsa-miR-578]
BAG3	7	[hsa-miR-135a-5p;hsa-miR-181a-5p;hsa-miR-29a-5p][hsa-miR-135a-5p;hsa-miR-29a-5p][hsa-miR-135a-5p;hsa-miR-29a-5p;hsa-miR-323b-3p][hsa-miR-135a-5p;hsa-miR-29a-5p;hsa-miR-338-3p][hsa-miR-135a-5p;hsa-miR-29a-5p;hsa-miR-373-5p][hsa-miR-203;hsa-miR-29a-5p;hsa-miR-3609][hsa-miR-29a-5p;hsa-miR-338-3p;hsa-miR-3609]
BAG4	8	[hsa-miR-103a-2-5p;hsa-miR-182-5p;hsa-miR-488-3p][hsa-miR-15a-5p;hsa-miR-182-5p;hsa-miR-335-3p][hsa-miR-182-5p;hsa-miR-30d-5p][hsa-miR-182-5p;hsa-miR-30d-5p;hsa-miR-424-5p][hsa-miR-182-5p;hsa-miR-335-3p][hsa-miR-182-5p;hsa-miR-335-3p;hsa-miR-497-5p][hsa-miR-182-5p;hsa-miR-488-3p][hsa-miR-182-5p;hsa-miR-488-3p;hsa-miR-9-5p]
BAG5	6	[hsa-miR-130a-3p;hsa-miR-376c][hsa-miR-195-5p;hsa-miR-376c][hsa-miR-19b-3p;hsa-miR-301b;hsa-miR-376c][hsa-miR-200b-3p;hsa-miR-301a-3p;hsa-miR-424-5p][hsa-miR-200b-3p;hsa-miR-424-5p;hsa-miR-497-5p][hsa-miR-301b;hsa-miR-376c]
BAG6	6	[hsa-miR-105-5p;hsa-miR-200c-3p;hsa-miR-3611][hsa-miR-141-3p;hsa-miR-200c-3p;hsa-miR-224-3p][hsa-miR-200a-3p;hsa-miR-200c-3p;hsa-miR-3691-5p][hsa-miR-200c-3p;hsa-miR-224-3p][hsa-miR-200c-3p;hsa-miR-3202][hsa-miR-200c-3p;hsa-miR-3202;hsa-miR-429]
BAGE	7	[hsa-miR-3139;hsa-miR-520e][hsa-miR-378b;hsa-miR-520e;hsa-miR-708-5p][hsa-miR-520d-3p;hsa-miR-520e;hsa-miR-708-5p][hsa-miR-520e;hsa-miR-520g;hsa-miR-708-5p][hsa-miR-520e;hsa-miR-520h;hsa-miR-708-5p][hsa-miR-520e;hsa-miR-708-5p][hsa-miR-520e;hsa-miR-708-5p;hsa-miR-93-5p]
BAHCC1	7	[hsa-miR-101-5p;hsa-miR-338-5p;hsa-miR-376c][hsa-miR-101-5p;hsa-miR-376c][hsa-miR-135b-5p;hsa-miR-148b-3p][hsa-miR-135b-5p;hsa-miR-148b-3p;hsa-miR-29a-5p][hsa-miR-135b-5p;hsa-miR-20b-5p][hsa-miR-148a-3p;hsa-miR-338-5p][hsa-miR-338-5p;hsa-miR-376c]
BAHD1	8	[hsa-miR-106a-5p;hsa-miR-18a-5p;hsa-miR-429][hsa-miR-1285-3p;hsa-miR-152;hsa-miR-301a-3p][hsa-miR-152;hsa-miR-18a-5p;hsa-miR-493-5p][hsa-miR-152;hsa-miR-301a-3p][hsa-miR-18a-5p;hsa-miR-429][hsa-miR-18a-5p;hsa-miR-493-5p][hsa-miR-301a-3p;hsa-miR-454-3p][hsa-miR-301a-3p;hsa-miR-502-5p]
BAI1	4	[hsa-miR-1267;hsa-miR-187-3p;hsa-miR-550a-5p][hsa-miR-187-3p;hsa-miR-3152-3p;hsa-miR-516a-5p][hsa-miR-187-3p;hsa-miR-516a-5p][hsa-miR-26b-3p;hsa-miR-550a-5p]
BAI2	8	[hsa-miR-1224-5p;hsa-miR-18a-3p;hsa-miR-2355-5p][hsa-miR-149-3p;hsa-miR-18a-3p;hsa-miR-2355-5p][hsa-miR-150-3p;hsa-miR-18a-3p;hsa-miR-2355-5p][hsa-miR-185-5p;hsa-miR-18a-3p;hsa-miR-2355-5p][hsa-miR-18a-3p;hsa-miR-2355-5p][hsa-miR-18a-3p;hsa-miR-2355-5p;hsa-miR-3170][hsa-miR-18a-3p;hsa-miR-2355-5p;hsa-miR-3615][hsa-miR-18a-3p;hsa-miR-3687]
BAI3	6	[hsa-let-7b-3p;hsa-miR-181d;hsa-miR-21-3p][hsa-miR-1253;hsa-miR-21-3p][hsa-miR-1;hsa-miR-21-3p;hsa-miR-579][hsa-miR-21-3p;hsa-miR-221-3p][hsa-miR-21-3p;hsa-miR-221-3p;hsa-miR-579][hsa-miR-21-3p;hsa-miR-579]
BAIAP2	6	[hsa-miR-1304-5p;hsa-miR-148a-3p][hsa-miR-1304-5p;hsa-miR-148a-3p;hsa-miR-29a-3p][hsa-miR-1304-5p;hsa-miR-148a-3p;hsa-miR-3065-3p][hsa-miR-15b-5p;hsa-miR-181d][hsa-miR-181d;hsa-miR-29a-3p][hsa-miR-3065-3p;hsa-miR-539-5p]
BAK1	6	[hsa-miR-125a-5p;hsa-miR-9-3p][hsa-miR-125b-5p;hsa-miR-29b-3p;hsa-miR-767-5p][hsa-miR-29a-3p;hsa-miR-29c-3p][hsa-miR-29a-3p;hsa-miR-767-5p][hsa-miR-29b-3p;hsa-miR-320d;hsa-miR-767-5p][hsa-miR-29b-3p;hsa-miR-767-5p]
BAMBI	6	[hsa-miR-142-5p;hsa-miR-302c-3p][hsa-miR-142-5p;hsa-miR-338-5p][hsa-miR-338-3p;hsa-miR-3609;hsa-miR-449b-5p][hsa-miR-338-3p;hsa-miR-3609;hsa-miR-551b-5p][hsa-miR-338-3p;hsa-miR-3609;hsa-miR-616-5p][hsa-miR-338-3p;hsa-miR-520e]
BANF1	3	[hsa-miR-181a-2-3p;hsa-miR-449a;hsa-miR-449b-5p][hsa-miR-181a-2-3p;hsa-miR-449a;hsa-miR-518c-5p][hsa-miR-449a;hsa-miR-449b-5p]
BANP	4	[hsa-miR-129-5p;hsa-miR-320c][hsa-miR-129-5p;hsa-miR-320c;hsa-miR-340-5p][hsa-miR-129-5p;hsa-miR-320d][hsa-miR-129-5p;hsa-miR-526b-5p]
BAP1	4	[hsa-miR-125a-5p;hsa-miR-577][hsa-miR-200b-3p;hsa-miR-200c-3p;hsa-miR-31-5p][hsa-miR-200b-3p;hsa-miR-200c-3p;hsa-miR-429][hsa-miR-200b-3p;hsa-miR-31-5p]
BARHL1	5	[hsa-let-7g-3p;hsa-miR-3925-5p][hsa-miR-3616-3p;hsa-miR-3680-5p;hsa-miR-3925-5p][hsa-miR-3616-3p;hsa-miR-3925-5p][hsa-miR-3653;hsa-miR-3925-5p;hsa-miR-589-5p][hsa-miR-3925-5p;hsa-miR-589-5p]
BARHL2	5	[hsa-miR-146b-3p;hsa-miR-370;hsa-miR-491-5p][hsa-miR-3175;hsa-miR-3664-5p;hsa-miR-491-5p][hsa-miR-3664-5p;hsa-miR-3911;hsa-miR-491-5p][hsa-miR-3664-5p;hsa-miR-491-5p][hsa-miR-370;hsa-miR-491-5p]
BARX1	6	[hsa-let-7a-3p;hsa-miR-142-5p;hsa-miR-664-5p][hsa-let-7a-3p;hsa-miR-224-5p;hsa-miR-548j][hsa-miR-142-5p;hsa-miR-376b][hsa-miR-142-5p;hsa-miR-592][hsa-miR-142-5p;hsa-miR-597][hsa-miR-142-5p;hsa-miR-664-5p]
BARX2	7	[hsa-miR-105-5p;hsa-miR-19b-3p][hsa-miR-105-5p;hsa-miR-19b-3p;hsa-miR-455-5p][hsa-miR-124-3p;hsa-miR-1287;hsa-miR-33a-5p][hsa-miR-1287;hsa-miR-33a-5p][hsa-miR-1287;hsa-miR-33a-5p;hsa-miR-548t-5p][hsa-miR-19b-3p;hsa-miR-455-5p][hsa-miR-33a-5p;hsa-miR-676-5p]
BASP1	7	[hsa-miR-181a-2-3p;hsa-miR-196a-5p;hsa-miR-29a-3p][hsa-miR-196a-5p;hsa-miR-29a-3p][hsa-miR-196a-5p;hsa-miR-29a-3p;hsa-miR-29a-5p][hsa-miR-196a-5p;hsa-miR-29a-3p;hsa-miR-320a][hsa-miR-196a-5p;hsa-miR-29a-3p;hsa-miR-507][hsa-miR-196a-5p;hsa-miR-29a-3p;hsa-miR-654-5p][hsa-miR-29a-3p;hsa-miR-31-5p;hsa-miR-320a]
BAX	6	[hsa-miR-32-3p;hsa-miR-3916][hsa-miR-32-3p;hsa-miR-3916;hsa-miR-455-3p][hsa-miR-32-3p;hsa-miR-3916;hsa-miR-559][hsa-miR-32-3p;hsa-miR-455-3p][hsa-miR-455-3p;hsa-miR-548b-5p;hsa-miR-548y][hsa-miR-455-3p;hsa-miR-548j]
BAZ1A	6	[hsa-miR-20b-3p;hsa-miR-493-5p][hsa-miR-30b-5p;hsa-miR-548f][hsa-miR-30b-5p;hsa-miR-548f;hsa-miR-767-5p][hsa-miR-382-5p;hsa-miR-492][hsa-miR-382-5p;hsa-miR-492;hsa-miR-582-5p][hsa-miR-492;hsa-miR-582-5p]
BAZ1B	5	[hsa-let-7b-3p;hsa-miR-10b-5p;hsa-miR-34c-3p][hsa-let-7f-1-3p;hsa-miR-125b-2-3p;hsa-miR-1286][hsa-let-7f-1-3p;hsa-miR-1286][hsa-miR-10b-5p;hsa-miR-34c-3p][hsa-miR-183-5p;hsa-miR-200a-5p;hsa-miR-493-5p]
BAZ2A	7	[hsa-miR-148a-3p;hsa-miR-214-3p][hsa-miR-148a-3p;hsa-miR-214-3p;hsa-miR-29b-2-5p][hsa-miR-148a-3p;hsa-miR-429][hsa-miR-148a-3p;hsa-miR-429;hsa-miR-99b-5p][hsa-miR-148b-3p;hsa-miR-224-5p][hsa-miR-148b-3p;hsa-miR-3660][hsa-miR-152;hsa-miR-18a-5p]
BAZ2B	6	[hsa-miR-1304-5p;hsa-miR-22-5p][hsa-miR-1304-5p;hsa-miR-22-5p;hsa-miR-513a-5p][hsa-miR-1304-5p;hsa-miR-22-5p;hsa-miR-7-1-3p][hsa-miR-149-3p;hsa-miR-483-3p;hsa-miR-92b-3p][hsa-miR-22-5p;hsa-miR-625-5p][hsa-miR-483-3p;hsa-miR-92b-3p]
BBC3	6	[hsa-let-7a-2-3p;hsa-miR-130a-3p;hsa-miR-200c-5p][hsa-let-7b-5p;hsa-miR-24-3p][hsa-miR-1266;hsa-miR-130a-3p;hsa-miR-200c-5p][hsa-miR-130a-3p;hsa-miR-200c-5p][hsa-miR-143-3p;hsa-miR-409-5p][hsa-miR-143-3p;hsa-miR-409-5p;hsa-miR-670]
BBIP1	1	[hsa-miR-1251;hsa-miR-16-1-3p;hsa-miR-3919]
BBS12	1	[hsa-miR-548s;hsa-miR-767-5p]
BBS2	1	[hsa-miR-338-3p;hsa-miR-548d-3p]
BBS5	5	[hsa-miR-1537;hsa-miR-3682-3p;hsa-miR-590-3p][hsa-miR-3607-3p;hsa-miR-3682-3p;hsa-miR-548d-3p][hsa-miR-3682-3p;hsa-miR-548d-3p;hsa-miR-708-3p][hsa-miR-3682-3p;hsa-miR-590-3p][hsa-miR-374a-3p;hsa-miR-552]
BBS7	4	[hsa-miR-27b-3p;hsa-miR-335-3p;hsa-miR-376b][hsa-miR-27b-3p;hsa-miR-376b;hsa-miR-664-3p][hsa-miR-335-3p;hsa-miR-376b][hsa-miR-335-3p;hsa-miR-548k]
BBX	7	[hsa-miR-106b-5p;hsa-miR-16-1-3p][hsa-miR-130b-3p;hsa-miR-16-1-3p;hsa-miR-625-3p][hsa-miR-135b-5p;hsa-miR-18a-5p;hsa-miR-548t-5p][hsa-miR-16-1-3p;hsa-miR-625-3p][hsa-miR-181a-2-3p;hsa-miR-18a-5p][hsa-miR-18a-5p;hsa-miR-23c;hsa-miR-548t-5p][hsa-miR-18a-5p;hsa-miR-548t-5p]
BCAM	5	[hsa-let-7d-5p;hsa-miR-1254][hsa-let-7d-5p;hsa-miR-1254;hsa-miR-30b-3p][hsa-let-7d-5p;hsa-miR-199a-5p][hsa-let-7d-5p;hsa-miR-30b-3p;hsa-miR-30c-2-3p][hsa-let-7d-5p;hsa-miR-30c-2-3p]
BCAN	6	[hsa-miR-1270;hsa-miR-138-1-3p;hsa-miR-218-2-3p][hsa-miR-132-3p;hsa-miR-138-1-3p][hsa-miR-132-3p;hsa-miR-138-1-3p;hsa-miR-148a-5p][hsa-miR-138-1-3p;hsa-miR-218-2-3p][hsa-miR-138-1-3p;hsa-miR-27a-3p][hsa-miR-138-1-3p;hsa-miR-3613-3p;hsa-miR-494]
BCAP29	5	[hsa-let-7b-3p;hsa-let-7g-5p][hsa-let-7b-3p;hsa-let-7g-5p;hsa-miR-330-3p][hsa-let-7b-3p;hsa-let-7g-5p;hsa-miR-452-3p][hsa-let-7f-5p;hsa-miR-885-5p][hsa-miR-154-5p;hsa-miR-3920;hsa-miR-98]
BCAR1	2	[hsa-miR-105-5p;hsa-miR-224-3p;hsa-miR-539-5p][hsa-miR-224-3p;hsa-miR-3148;hsa-miR-539-5p]
BCAR3	6	[hsa-miR-1914-5p;hsa-miR-513b][hsa-miR-19a-3p;hsa-miR-222-5p;hsa-miR-33a-3p][hsa-miR-29a-5p;hsa-miR-30a-3p;hsa-miR-513b][hsa-miR-29a-5p;hsa-miR-30e-3p;hsa-miR-513b][hsa-miR-29a-5p;hsa-miR-513b;hsa-miR-664-3p][hsa-miR-513b;hsa-miR-664-3p]
BCAS1	4	[hsa-miR-146b-5p;hsa-miR-369-3p;hsa-miR-589-5p][hsa-miR-151a-3p;hsa-miR-3607-3p;hsa-miR-378a-5p][hsa-miR-151a-3p;hsa-miR-378a-5p][hsa-miR-151a-3p;hsa-miR-378a-5p;hsa-miR-589-5p]
BCAS2	1	[hsa-miR-486-5p;hsa-miR-532-5p]
BCAS3	8	[hsa-miR-100-3p;hsa-miR-190b;hsa-miR-24-2-5p][hsa-miR-100-3p;hsa-miR-24-2-5p][hsa-miR-127-3p;hsa-miR-24-1-5p;hsa-miR-24-2-5p][hsa-miR-127-3p;hsa-miR-24-2-5p][hsa-miR-127-3p;hsa-miR-24-2-5p;hsa-miR-944][hsa-miR-190b;hsa-miR-24-2-5p][hsa-miR-24-1-5p;hsa-miR-24-2-5p][hsa-miR-24-1-5p;hsa-miR-24-2-5p;hsa-miR-944]
BCAT1	8	[hsa-let-7f-5p;hsa-let-7g-5p;hsa-miR-196b-5p][hsa-let-7f-5p;hsa-miR-196b-5p][hsa-let-7g-5p;hsa-miR-196b-5p][hsa-miR-135a-5p;hsa-miR-181a-2-3p][hsa-miR-135a-5p;hsa-miR-196b-5p;hsa-miR-338-5p][hsa-miR-196b-5p;hsa-miR-338-5p][hsa-miR-196b-5p;hsa-miR-338-5p;hsa-miR-371a-3p][hsa-miR-196b-5p;hsa-miR-338-5p;hsa-miR-519c-3p]
BCAT2	6	[hsa-miR-125a-3p;hsa-miR-1271-5p;hsa-miR-205-3p][hsa-miR-125a-3p;hsa-miR-363-3p;hsa-miR-92a-3p][hsa-miR-1271-5p;hsa-miR-32-5p;hsa-miR-96-5p][hsa-miR-1271-5p;hsa-miR-96-5p][hsa-miR-363-3p;hsa-miR-9-5p;hsa-miR-92a-3p][hsa-miR-363-3p;hsa-miR-92a-3p]
BCCIP	8	[hsa-miR-15b-3p;hsa-miR-30d-3p][hsa-miR-194-5p;hsa-miR-561-3p][hsa-miR-30d-3p;hsa-miR-3688-3p][hsa-miR-30e-3p;hsa-miR-561-3p][hsa-miR-545-5p;hsa-miR-561-3p][hsa-miR-561-3p;hsa-miR-7-5p][hsa-miR-561-3p;hsa-miR-877-5p][hsa-miR-561-3p;hsa-miR-96-3p]
BCKDHB	1	[hsa-miR-141-5p;hsa-miR-181c-3p]
BCKDK	6	[hsa-miR-103a-3p;hsa-miR-146b-3p;hsa-miR-379-5p][hsa-miR-1288;hsa-miR-3199][hsa-miR-146b-3p;hsa-miR-320d;hsa-miR-379-5p][hsa-miR-181a-3p;hsa-miR-365a-3p;hsa-miR-379-5p][hsa-miR-320d;hsa-miR-379-5p][hsa-miR-365a-3p;hsa-miR-379-5p]
BCL10	6	[hsa-miR-30b-5p;hsa-miR-30c-5p;hsa-miR-30e-5p][hsa-miR-30b-5p;hsa-miR-30e-5p][hsa-miR-30b-5p;hsa-miR-30e-5p;hsa-miR-485-5p][hsa-miR-30b-5p;hsa-miR-485-5p][hsa-miR-30c-5p;hsa-miR-329][hsa-miR-30d-5p;hsa-miR-329]
BCL11A	8	[hsa-miR-181c-3p;hsa-miR-485-5p;hsa-miR-577][hsa-miR-18a-5p;hsa-miR-3613-3p;hsa-miR-577][hsa-miR-18a-5p;hsa-miR-577][hsa-miR-23a-3p;hsa-miR-485-5p;hsa-miR-577][hsa-miR-33b-3p;hsa-miR-577][hsa-miR-34b-5p;hsa-miR-499a-3p;hsa-miR-577][hsa-miR-34b-5p;hsa-miR-577][hsa-miR-485-5p;hsa-miR-577]
BCL11B	6	[hsa-miR-10a-5p;hsa-miR-142-5p;hsa-miR-29c-3p][hsa-miR-142-5p;hsa-miR-22-5p;hsa-miR-624-3p][hsa-miR-142-5p;hsa-miR-29c-3p;hsa-miR-375][hsa-miR-142-5p;hsa-miR-624-3p][hsa-miR-203;hsa-miR-214-5p][hsa-miR-203;hsa-miR-218-5p]
BCL2	5	[hsa-miR-181c-5p;hsa-miR-30c-5p;hsa-miR-342-5p][hsa-miR-181c-5p;hsa-miR-342-5p][hsa-miR-22-5p;hsa-miR-338-5p][hsa-miR-3065-5p;hsa-miR-30a-5p;hsa-miR-3156-5p][hsa-miR-3065-5p;hsa-miR-30a-5p;hsa-miR-342-5p]
BCL2L1	8	[hsa-miR-1255a;hsa-miR-135b-3p;hsa-miR-455-3p][hsa-miR-135b-3p;hsa-miR-205-3p][hsa-miR-135b-3p;hsa-miR-205-3p;hsa-miR-502-5p][hsa-miR-135b-3p;hsa-miR-205-3p;hsa-miR-7-1-3p][hsa-miR-135b-3p;hsa-miR-377-3p][hsa-miR-135b-3p;hsa-miR-455-3p][hsa-miR-135b-3p;hsa-miR-455-3p;hsa-miR-505-5p][hsa-miR-135b-3p;hsa-miR-455-3p;hsa-miR-7-5p]
BCL2L11	7	[hsa-miR-101-3p;hsa-miR-181a-5p;hsa-miR-221-3p][hsa-miR-148a-3p;hsa-miR-181a-5p;hsa-miR-221-3p][hsa-miR-181a-5p;hsa-miR-221-3p][hsa-miR-181a-5p;hsa-miR-221-3p;hsa-miR-30e-5p][hsa-miR-2116-5p;hsa-miR-221-3p;hsa-miR-374c-5p][hsa-miR-221-3p;hsa-miR-374c-5p][hsa-miR-221-3p;hsa-miR-454-3p]
BCL2L12	4	[hsa-miR-125a-5p;hsa-miR-1271-5p;hsa-miR-7-5p][hsa-miR-125a-5p;hsa-miR-7-5p][hsa-miR-125b-5p;hsa-miR-7-5p][hsa-miR-1271-5p;hsa-miR-7-5p]
BCL2L13	3	[hsa-miR-1237;hsa-miR-1827][hsa-miR-125a-5p;hsa-miR-182-5p][hsa-miR-125a-5p;hsa-miR-182-5p;hsa-miR-342-5p]
BCL2L14	7	[hsa-miR-10a-5p;hsa-miR-1287;hsa-miR-934][hsa-miR-10a-5p;hsa-miR-934][hsa-miR-1287;hsa-miR-138-1-3p;hsa-miR-934][hsa-miR-1287;hsa-miR-934][hsa-miR-138-1-3p;hsa-miR-148a-5p;hsa-miR-934][hsa-miR-138-1-3p;hsa-miR-27b-5p;hsa-miR-934][hsa-miR-138-1-3p;hsa-miR-504]
BCL2L15	5	[hsa-miR-148b-5p;hsa-miR-3140-3p;hsa-miR-3607-5p][hsa-miR-148b-5p;hsa-miR-3607-5p][hsa-miR-24-1-5p;hsa-miR-3140-3p;hsa-miR-3607-5p][hsa-miR-24-1-5p;hsa-miR-3607-5p][hsa-miR-3140-3p;hsa-miR-3607-5p]
BCL2L2	7	[hsa-miR-103a-3p;hsa-miR-155-5p][hsa-miR-103a-3p;hsa-miR-155-5p;hsa-miR-29c-3p][hsa-miR-103a-3p;hsa-miR-155-5p;hsa-miR-676-3p][hsa-miR-135b-5p;hsa-miR-378a-3p][hsa-miR-155-5p;hsa-miR-3926][hsa-miR-155-5p;hsa-miR-548n][hsa-miR-378a-3p;hsa-miR-497-5p]
BCL3	3	[hsa-miR-19a-3p;hsa-miR-19b-3p][hsa-miR-19a-3p;hsa-miR-486-3p][hsa-miR-27b-3p;hsa-miR-32-3p;hsa-miR-556-3p]
BCL6	7	[hsa-let-7b-3p;hsa-miR-183-5p][hsa-let-7b-3p;hsa-miR-183-5p;hsa-miR-331-3p][hsa-let-7b-3p;hsa-miR-183-5p;hsa-miR-33a-3p][hsa-miR-181a-5p;hsa-miR-24-1-5p;hsa-miR-625-5p][hsa-miR-181a-5p;hsa-miR-625-5p][hsa-miR-181c-5p;hsa-miR-183-5p][hsa-miR-181c-5p;hsa-miR-183-5p;hsa-miR-421]
BCL6B	1	[hsa-miR-18b-3p;hsa-miR-216b;hsa-miR-7-1-3p]
BCL7A	6	[hsa-miR-130b-3p;hsa-miR-18a-5p;hsa-miR-22-5p][hsa-miR-148a-3p;hsa-miR-676-5p][hsa-miR-148b-5p;hsa-miR-22-5p][hsa-miR-148b-5p;hsa-miR-22-5p;hsa-miR-507][hsa-miR-15a-5p;hsa-miR-18a-5p;hsa-miR-22-5p][hsa-miR-18a-5p;hsa-miR-22-5p;hsa-miR-27b-3p]
BCL7B	5	[hsa-miR-148a-3p;hsa-miR-18a-5p][hsa-miR-148a-3p;hsa-miR-590-3p][hsa-miR-148a-3p;hsa-miR-607][hsa-miR-205-5p;hsa-miR-421;hsa-miR-590-3p][hsa-miR-26a-1-3p;hsa-miR-590-3p]
BCL7C	1	[hsa-miR-493-3p;hsa-miR-524-5p]
BCL9	8	[hsa-miR-1266;hsa-miR-146a-5p;hsa-miR-188-3p][hsa-miR-146a-5p;hsa-miR-188-3p][hsa-miR-146a-5p;hsa-miR-188-3p;hsa-miR-188-5p][hsa-miR-146a-5p;hsa-miR-188-3p;hsa-miR-3192][hsa-miR-146a-5p;hsa-miR-188-3p;hsa-miR-363-3p][hsa-miR-146a-5p;hsa-miR-188-3p;hsa-miR-92b-3p][hsa-miR-146a-5p;hsa-miR-29b-2-5p][hsa-miR-146a-5p;hsa-miR-29b-2-5p;hsa-miR-492]
BCL9L	7	[hsa-miR-124-3p;hsa-miR-144-3p;hsa-miR-29c-3p][hsa-miR-144-3p;hsa-miR-29a-3p;hsa-miR-29c-3p][hsa-miR-144-3p;hsa-miR-29c-3p][hsa-miR-15b-5p;hsa-miR-16-5p][hsa-miR-16-5p;hsa-miR-577][hsa-miR-29b-2-5p;hsa-miR-29c-3p;hsa-miR-548d-3p][hsa-miR-29c-3p;hsa-miR-548d-3p]
BCLAF1	3	[hsa-miR-1248;hsa-miR-379-3p][hsa-miR-3620;hsa-miR-501-5p][hsa-miR-501-5p;hsa-miR-9-5p]
BCMO1	1	[hsa-miR-3682-3p;hsa-miR-942]
BCO2	7	[hsa-miR-1275;hsa-miR-34c-5p][hsa-miR-25-3p;hsa-miR-29a-3p;hsa-miR-509-3-5p][hsa-miR-25-3p;hsa-miR-3929][hsa-miR-29a-3p;hsa-miR-484][hsa-miR-29a-3p;hsa-miR-489][hsa-miR-29a-3p;hsa-miR-489;hsa-miR-92b-3p][hsa-miR-29a-3p;hsa-miR-509-3-5p]
BCOR	7	[hsa-miR-190b;hsa-miR-29b-1-5p;hsa-miR-520d-5p][hsa-miR-190b;hsa-miR-425-5p][hsa-miR-190b;hsa-miR-520d-5p][hsa-miR-22-5p;hsa-miR-584-5p;hsa-miR-92b-3p][hsa-miR-22-5p;hsa-miR-92b-3p][hsa-miR-30d-5p;hsa-miR-380-3p;hsa-miR-664-5p][hsa-miR-30d-5p;hsa-miR-664-5p]
BCORL1	8	[hsa-miR-129-5p;hsa-miR-27a-3p;hsa-miR-486-5p][hsa-miR-146a-5p;hsa-miR-335-3p][hsa-miR-146a-5p;hsa-miR-335-3p;hsa-miR-622][hsa-miR-222-5p;hsa-miR-27a-3p;hsa-miR-486-5p][hsa-miR-27a-3p;hsa-miR-27b-3p;hsa-miR-29c-3p][hsa-miR-27a-3p;hsa-miR-29a-3p][hsa-miR-27a-3p;hsa-miR-29c-3p][hsa-miR-27a-3p;hsa-miR-486-5p]
BCR	5	[hsa-miR-497-3p;hsa-miR-524-5p;hsa-miR-651][hsa-miR-497-3p;hsa-miR-651;hsa-miR-96-5p][hsa-miR-548f;hsa-miR-651][hsa-miR-548f;hsa-miR-651;hsa-miR-96-5p][hsa-miR-651;hsa-miR-96-5p]
BDH2	1	[hsa-miR-186-3p;hsa-miR-1976]
BDKRB2	1	[hsa-miR-130b-5p;hsa-miR-505-5p]
BDNF	6	[hsa-miR-3065-5p;hsa-miR-30d-3p][hsa-miR-3065-5p;hsa-miR-30d-3p;hsa-miR-3607-5p][hsa-miR-30b-5p;hsa-miR-3607-5p][hsa-miR-30d-3p;hsa-miR-30e-5p][hsa-miR-30d-3p;hsa-miR-381][hsa-miR-30d-3p;hsa-miR-491-3p;hsa-miR-625-5p]
BDP1	6	[hsa-miR-1248;hsa-miR-181a-2-3p;hsa-miR-429][hsa-miR-1248;hsa-miR-3117-3p][hsa-miR-1248;hsa-miR-3169;hsa-miR-429][hsa-miR-1248;hsa-miR-429][hsa-miR-1248;hsa-miR-548t-5p][hsa-miR-452-5p;hsa-miR-548t-5p]
BEAN1	7	[hsa-miR-129-1-3p;hsa-miR-199a-5p;hsa-miR-30a-5p][hsa-miR-144-3p;hsa-miR-199a-5p;hsa-miR-30a-5p][hsa-miR-199a-5p;hsa-miR-30a-5p][hsa-miR-199a-5p;hsa-miR-30a-5p;hsa-miR-30b-5p][hsa-miR-199a-5p;hsa-miR-30b-5p;hsa-miR-488-3p][hsa-miR-199a-5p;hsa-miR-488-3p][hsa-miR-29b-3p;hsa-miR-30d-5p]
BECN1	6	[hsa-miR-106a-5p;hsa-miR-144-3p][hsa-miR-136-5p;hsa-miR-548t-5p;hsa-miR-577][hsa-miR-199b-5p;hsa-miR-30a-5p;hsa-miR-577][hsa-miR-30a-5p;hsa-miR-577][hsa-miR-548t-5p;hsa-miR-577][hsa-miR-577;hsa-miR-889]
BEGAIN	8	[hsa-let-7b-5p;hsa-let-7c;hsa-let-7e-5p][hsa-let-7b-5p;hsa-let-7e-5p;hsa-miR-3667-5p][hsa-let-7b-5p;hsa-miR-101-3p;hsa-miR-3667-5p][hsa-let-7b-5p;hsa-miR-3667-5p][hsa-let-7b-5p;hsa-miR-3927][hsa-let-7c;hsa-let-7e-5p][hsa-let-7e-5p;hsa-miR-101-3p;hsa-miR-98][hsa-let-7e-5p;hsa-miR-98]
BEND3	5	[hsa-miR-135a-5p;hsa-miR-548f][hsa-miR-181d;hsa-miR-410;hsa-miR-548f][hsa-miR-18a-5p;hsa-miR-3164;hsa-miR-548e][hsa-miR-410;hsa-miR-548f][hsa-miR-410;hsa-miR-548f;hsa-miR-676-3p]
BEND4	8	[hsa-let-7f-5p;hsa-miR-142-5p;hsa-miR-19a-3p][hsa-let-7i-5p;hsa-miR-19a-3p;hsa-miR-3065-5p][hsa-miR-142-5p;hsa-miR-196a-5p;hsa-miR-19a-3p][hsa-miR-142-5p;hsa-miR-19a-3p][hsa-miR-19a-3p;hsa-miR-19a-5p;hsa-miR-577][hsa-miR-19a-3p;hsa-miR-345-5p;hsa-miR-577][hsa-miR-19a-3p;hsa-miR-450a-5p;hsa-miR-577][hsa-miR-19a-3p;hsa-miR-577]
BEND6	5	[hsa-let-7a-5p;hsa-miR-196a-5p][hsa-let-7c;hsa-miR-18a-5p][hsa-let-7c;hsa-miR-98][hsa-let-7i-5p;hsa-miR-196b-5p][hsa-let-7i-5p;hsa-miR-196b-5p;hsa-miR-200c-5p]
BEND7	6	[hsa-miR-186-5p;hsa-miR-27a-3p][hsa-miR-186-5p;hsa-miR-27a-3p;hsa-miR-30e-5p][hsa-miR-27a-3p;hsa-miR-3136-5p;hsa-miR-3146][hsa-miR-27a-3p;hsa-miR-502-3p;hsa-miR-584-5p][hsa-miR-27a-3p;hsa-miR-584-5p][hsa-miR-29a-3p;hsa-miR-876-5p]
BEST1	6	[hsa-miR-103a-3p;hsa-miR-27a-3p][hsa-miR-15b-5p;hsa-miR-542-3p][hsa-miR-15b-5p;hsa-miR-542-3p;hsa-miR-766-3p][hsa-miR-27a-3p;hsa-miR-497-5p][hsa-miR-27a-3p;hsa-miR-542-3p][hsa-miR-542-3p;hsa-miR-766-3p]
BEST3	3	[hsa-miR-365a-3p;hsa-miR-539-5p][hsa-miR-365a-3p;hsa-miR-539-5p;hsa-miR-582-3p][hsa-miR-539-5p;hsa-miR-582-3p]
BEST4	2	[hsa-miR-15a-5p;hsa-miR-15b-5p;hsa-miR-16-5p][hsa-miR-15b-5p;hsa-miR-16-5p;hsa-miR-589-5p]
BET1	4	[hsa-miR-23a-3p;hsa-miR-23b-3p;hsa-miR-23c][hsa-miR-23b-3p;hsa-miR-23c][hsa-miR-23b-3p;hsa-miR-23c;hsa-miR-7-1-3p][hsa-miR-23c;hsa-miR-7-1-3p]
BET1L	4	[hsa-miR-3655;hsa-miR-3684][hsa-miR-3655;hsa-miR-518b][hsa-miR-3684;hsa-miR-518e-3p;hsa-miR-518f-3p][hsa-miR-518b;hsa-miR-518e-3p]
BEX4	2	[hsa-miR-130a-5p;hsa-miR-23a-3p;hsa-miR-23b-3p][hsa-miR-23a-3p;hsa-miR-23b-3p]
BFAR	7	[hsa-miR-146a-3p;hsa-miR-16-5p;hsa-miR-205-3p][hsa-miR-15a-5p;hsa-miR-16-5p;hsa-miR-205-3p][hsa-miR-15a-5p;hsa-miR-16-5p;hsa-miR-26a-5p][hsa-miR-16-5p;hsa-miR-205-3p][hsa-miR-16-5p;hsa-miR-205-3p;hsa-miR-455-5p][hsa-miR-16-5p;hsa-miR-26a-5p;hsa-miR-455-5p][hsa-miR-16-5p;hsa-miR-455-5p]
BHLHB9	1	[hsa-miR-142-3p;hsa-miR-3187-3p]
BHLHE22	7	[hsa-miR-1289;hsa-miR-204-5p;hsa-miR-381][hsa-miR-1289;hsa-miR-374c-5p;hsa-miR-938][hsa-miR-204-5p;hsa-miR-376c][hsa-miR-204-5p;hsa-miR-381][hsa-miR-3190-5p;hsa-miR-374c-5p;hsa-miR-938][hsa-miR-374c-5p;hsa-miR-938][hsa-miR-377-3p;hsa-miR-938]
BHLHE40	7	[hsa-miR-218-5p;hsa-miR-30d-5p;hsa-miR-505-3p][hsa-miR-30d-5p;hsa-miR-369-3p;hsa-miR-505-3p][hsa-miR-30d-5p;hsa-miR-378a-3p;hsa-miR-505-3p][hsa-miR-30d-5p;hsa-miR-505-3p][hsa-miR-3682-3p;hsa-miR-877-5p][hsa-miR-410;hsa-miR-505-3p;hsa-miR-889][hsa-miR-505-3p;hsa-miR-889]
BHLHE41	7	[hsa-miR-100-3p;hsa-miR-196b-3p][hsa-miR-106a-3p;hsa-miR-130b-3p;hsa-miR-33a-5p][hsa-miR-130b-3p;hsa-miR-33a-5p][hsa-miR-130b-3p;hsa-miR-33a-5p;hsa-miR-377-5p][hsa-miR-130b-3p;hsa-miR-33a-5p;hsa-miR-424-5p][hsa-miR-182-5p;hsa-miR-196b-3p][hsa-miR-196b-3p;hsa-miR-31-5p]
BHMT2	1	[hsa-miR-205-3p;hsa-miR-34b-3p]
BICC1	6	[hsa-miR-106a-5p;hsa-miR-106b-5p;hsa-miR-450b-5p][hsa-miR-106b-5p;hsa-miR-99a-5p][hsa-miR-125a-3p;hsa-miR-99a-5p][hsa-miR-1976;hsa-miR-485-3p;hsa-miR-99a-5p][hsa-miR-485-3p;hsa-miR-9-5p;hsa-miR-99a-5p][hsa-miR-485-3p;hsa-miR-99a-5p]
BICD1	5	[hsa-miR-106b-3p;hsa-miR-142-5p;hsa-miR-431-5p][hsa-miR-106b-3p;hsa-miR-185-5p][hsa-miR-106b-3p;hsa-miR-431-5p][hsa-miR-106b-3p;hsa-miR-431-5p;hsa-miR-548y][hsa-miR-1;hsa-miR-106b-3p;hsa-miR-431-5p]
BICD2	4	[hsa-miR-135b-5p;hsa-miR-16-2-3p;hsa-miR-191-5p][hsa-miR-16-2-3p;hsa-miR-191-5p][hsa-miR-190b;hsa-miR-205-3p;hsa-miR-3607-3p][hsa-miR-190b;hsa-miR-3607-3p]
BID	1	[hsa-miR-2114-5p;hsa-miR-224-5p]
BIK	2	[hsa-miR-107;hsa-miR-199b-5p;hsa-miR-3117-3p][hsa-miR-214-3p;hsa-miR-3117-3p]
BIN1	2	[hsa-miR-1305;hsa-miR-214-3p;hsa-miR-22-5p][hsa-miR-214-3p;hsa-miR-22-5p;hsa-miR-708-3p]
BIN2	5	[hsa-miR-142-5p;hsa-miR-155-5p][hsa-miR-142-5p;hsa-miR-155-5p;hsa-miR-3938][hsa-miR-142-5p;hsa-miR-155-5p;hsa-miR-486-3p][hsa-miR-142-5p;hsa-miR-155-5p;hsa-miR-765][hsa-miR-142-5p;hsa-miR-486-3p]
BIN3	5	[hsa-miR-103a-2-5p;hsa-miR-577][hsa-miR-3914;hsa-miR-7-1-3p][hsa-miR-3914;hsa-miR-7-1-3p;hsa-miR-98][hsa-miR-577;hsa-miR-7-1-3p][hsa-miR-577;hsa-miR-98]
BIRC2	5	[hsa-miR-1229;hsa-miR-135b-5p][hsa-miR-1229;hsa-miR-135b-5p;hsa-miR-342-3p][hsa-miR-1229;hsa-miR-342-3p][hsa-miR-135b-5p;hsa-miR-342-3p][hsa-miR-135b-5p;hsa-miR-342-3p;hsa-miR-491-3p]
BIRC3	3	[hsa-miR-142-3p;hsa-miR-369-3p][hsa-miR-142-3p;hsa-miR-369-3p;hsa-miR-651][hsa-miR-142-3p;hsa-miR-374a-5p]
BIRC6	6	[hsa-let-7a-3p;hsa-miR-3622b-3p;hsa-miR-489][hsa-miR-18b-5p;hsa-miR-29a-3p][hsa-miR-18b-5p;hsa-miR-3662][hsa-miR-18b-5p;hsa-miR-628-5p][hsa-miR-3622b-3p;hsa-miR-489][hsa-miR-483-3p;hsa-miR-653]
BIVM	5	[hsa-miR-181d;hsa-miR-3065-5p][hsa-miR-196a-3p;hsa-miR-455-3p][hsa-miR-20b-3p;hsa-miR-29c-3p][hsa-miR-3126-3p;hsa-miR-551a][hsa-miR-455-3p;hsa-miR-802]
BLCAP	7	[hsa-miR-148a-3p;hsa-miR-561-3p][hsa-miR-192-3p;hsa-miR-19a-3p;hsa-miR-454-3p][hsa-miR-19a-3p;hsa-miR-3199;hsa-miR-454-3p][hsa-miR-19a-3p;hsa-miR-454-3p][hsa-miR-1;hsa-miR-148a-3p;hsa-miR-561-3p][hsa-miR-30b-5p;hsa-miR-466;hsa-miR-561-3p][hsa-miR-30b-5p;hsa-miR-561-3p]
BLM	1	[hsa-miR-338-3p;hsa-miR-628-5p]
BLMH	8	[hsa-miR-103a-3p;hsa-miR-15a-5p][hsa-miR-103a-3p;hsa-miR-181c-3p][hsa-miR-103a-3p;hsa-miR-181c-3p;hsa-miR-374a-3p][hsa-miR-107;hsa-miR-2114-5p;hsa-miR-2115-3p][hsa-miR-1301;hsa-miR-2114-5p;hsa-miR-2115-3p][hsa-miR-2114-5p;hsa-miR-2115-3p][hsa-miR-2114-5p;hsa-miR-2115-3p;hsa-miR-374a-3p][hsa-miR-2115-3p;hsa-miR-222-5p]
BLOC1S2	4	[hsa-miR-26a-5p;hsa-miR-3653][hsa-miR-26a-5p;hsa-miR-3653;hsa-miR-3664-5p][hsa-miR-26a-5p;hsa-miR-3653;hsa-miR-548d-3p][hsa-miR-26a-5p;hsa-miR-449b-3p]
BMF	6	[hsa-miR-1179;hsa-miR-29c-3p;hsa-miR-495][hsa-miR-181c-5p;hsa-miR-29c-3p][hsa-miR-29a-3p;hsa-miR-3065-5p;hsa-miR-3149][hsa-miR-29c-3p;hsa-miR-495][hsa-miR-29c-3p;hsa-miR-495;hsa-miR-508-3p][hsa-miR-29c-3p;hsa-miR-580;hsa-miR-582-5p]
BMI1	6	[hsa-miR-103a-2-5p;hsa-miR-3919;hsa-miR-577][hsa-miR-10a-3p;hsa-miR-3662;hsa-miR-577][hsa-miR-3662;hsa-miR-509-3p;hsa-miR-577][hsa-miR-3662;hsa-miR-577][hsa-miR-3919;hsa-miR-545-5p;hsa-miR-577][hsa-miR-3919;hsa-miR-577]
BMP1	6	[hsa-miR-141-3p;hsa-miR-204-5p][hsa-miR-141-3p;hsa-miR-204-5p;hsa-miR-4326][hsa-miR-181c-3p;hsa-miR-411-3p][hsa-miR-29c-3p;hsa-miR-3610][hsa-miR-29c-3p;hsa-miR-3610;hsa-miR-379-3p][hsa-miR-29c-3p;hsa-miR-3610;hsa-miR-544b]
BMP10	2	[hsa-miR-216a;hsa-miR-26a-5p][hsa-miR-26a-5p;hsa-miR-3914]
BMP2	6	[hsa-miR-146a-3p;hsa-miR-2116-5p][hsa-miR-146a-3p;hsa-miR-378a-3p;hsa-miR-545-3p][hsa-miR-146a-3p;hsa-miR-543;hsa-miR-545-3p][hsa-miR-146a-3p;hsa-miR-545-3p][hsa-miR-450b-5p;hsa-miR-452-3p;hsa-miR-548s][hsa-miR-548s;hsa-miR-651]
BMP2K	6	[hsa-miR-18b-5p;hsa-miR-1910;hsa-miR-30a-3p][hsa-miR-18b-5p;hsa-miR-3074-3p][hsa-miR-18b-5p;hsa-miR-3074-3p;hsa-miR-520h][hsa-miR-18b-5p;hsa-miR-30a-3p][hsa-miR-18b-5p;hsa-miR-659-3p][hsa-miR-29b-2-5p;hsa-miR-659-3p]
BMP3	7	[hsa-miR-1234;hsa-miR-181c-5p][hsa-miR-1234;hsa-miR-181c-5p;hsa-miR-34a-5p][hsa-miR-140-3p;hsa-miR-181c-5p;hsa-miR-21-3p][hsa-miR-181c-5p;hsa-miR-183-3p;hsa-miR-21-3p][hsa-miR-181c-5p;hsa-miR-21-3p][hsa-miR-21-3p;hsa-miR-382-5p][hsa-miR-449a;hsa-miR-494]
BMP4	8	[hsa-miR-101-5p;hsa-miR-340-5p;hsa-miR-449c-5p][hsa-miR-101-5p;hsa-miR-449c-5p][hsa-miR-101-5p;hsa-miR-449c-5p;hsa-miR-548n][hsa-miR-101-5p;hsa-miR-449c-5p;hsa-miR-548t-5p][hsa-miR-10a-3p;hsa-miR-3173-3p;hsa-miR-449c-5p][hsa-miR-10a-3p;hsa-miR-3650;hsa-miR-449c-5p][hsa-miR-10a-3p;hsa-miR-449c-5p][hsa-miR-33a-3p;hsa-miR-449c-5p;hsa-miR-548o-3p]
BMP5	6	[hsa-miR-1301;hsa-miR-3140-3p;hsa-miR-363-3p][hsa-miR-3140-3p;hsa-miR-363-3p][hsa-miR-3140-3p;hsa-miR-363-3p;hsa-miR-508-3p][hsa-miR-3140-3p;hsa-miR-363-3p;hsa-miR-92a-3p][hsa-miR-3140-3p;hsa-miR-363-3p;hsa-miR-92b-3p][hsa-miR-32-5p;hsa-miR-508-3p;hsa-miR-92a-3p]
BMP6	8	[hsa-miR-130a-3p;hsa-miR-27a-3p][hsa-miR-142-5p;hsa-miR-519a-3p;hsa-miR-584-5p][hsa-miR-19a-3p;hsa-miR-519a-3p;hsa-miR-584-5p][hsa-miR-27a-3p;hsa-miR-28-5p][hsa-miR-340-5p;hsa-miR-519a-3p;hsa-miR-584-5p][hsa-miR-519a-3p;hsa-miR-519c-3p;hsa-miR-584-5p][hsa-miR-519a-3p;hsa-miR-548n;hsa-miR-584-5p][hsa-miR-519a-3p;hsa-miR-584-5p]
BMP7	5	[hsa-miR-32-5p;hsa-miR-342-3p;hsa-miR-495][hsa-miR-32-5p;hsa-miR-342-3p;hsa-miR-570-3p][hsa-miR-32-5p;hsa-miR-342-3p;hsa-miR-664-3p][hsa-miR-32-5p;hsa-miR-542-3p;hsa-miR-651][hsa-miR-342-3p;hsa-miR-556-3p]
BMPER	2	[hsa-miR-3662;hsa-miR-466;hsa-miR-616-5p][hsa-miR-3662;hsa-miR-520g]
BMPR1A	6	[hsa-miR-16-5p;hsa-miR-497-3p][hsa-miR-16-5p;hsa-miR-497-3p;hsa-miR-93-3p][hsa-miR-27a-3p;hsa-miR-320d][hsa-miR-27b-3p;hsa-miR-424-5p;hsa-miR-93-3p][hsa-miR-320d;hsa-miR-518a-3p][hsa-miR-424-5p;hsa-miR-93-3p]
BMPR1B	7	[hsa-miR-101-3p;hsa-miR-194-5p;hsa-miR-505-5p][hsa-miR-101-3p;hsa-miR-301a-3p;hsa-miR-505-5p][hsa-miR-101-3p;hsa-miR-505-5p][hsa-miR-125a-5p;hsa-miR-505-5p][hsa-miR-125b-5p;hsa-miR-1271-5p;hsa-miR-505-5p][hsa-miR-125b-5p;hsa-miR-505-5p][hsa-miR-125b-5p;hsa-miR-505-5p;hsa-miR-656]
BMPR2	4	[hsa-miR-106b-5p;hsa-miR-99a-5p][hsa-miR-1248;hsa-miR-130b-3p][hsa-miR-20a-5p;hsa-miR-410][hsa-miR-374c-5p;hsa-miR-526b-3p]
BNC1	2	[hsa-miR-30b-5p;hsa-miR-3126-5p;hsa-miR-378a-5p][hsa-miR-376a-3p;hsa-miR-499a-5p;hsa-miR-520d-3p]
BNC2	4	[hsa-miR-106b-5p;hsa-miR-3150b-3p;hsa-miR-889][hsa-miR-106b-5p;hsa-miR-33a-5p][hsa-miR-106b-5p;hsa-miR-545-3p;hsa-miR-889][hsa-miR-106b-5p;hsa-miR-889]
BNIP2	6	[hsa-miR-105-5p;hsa-miR-130a-5p;hsa-miR-491-3p][hsa-miR-10b-5p;hsa-miR-135b-5p][hsa-miR-10b-5p;hsa-miR-135b-5p;hsa-miR-93-5p][hsa-miR-10b-5p;hsa-miR-643][hsa-miR-130a-5p;hsa-miR-374a-5p][hsa-miR-130a-5p;hsa-miR-491-3p]
BNIP3L	6	[hsa-miR-17-5p;hsa-miR-30b-5p][hsa-miR-17-5p;hsa-miR-30b-5p;hsa-miR-758][hsa-miR-190b;hsa-miR-2115-5p;hsa-miR-320a][hsa-miR-2115-5p;hsa-miR-320a][hsa-miR-3154;hsa-miR-320a;hsa-miR-520a-3p][hsa-miR-320a;hsa-miR-520a-3p]
BOC	8	[hsa-miR-135b-5p;hsa-miR-139-5p;hsa-miR-190b][hsa-miR-135b-5p;hsa-miR-190b][hsa-miR-190a;hsa-miR-190b][hsa-miR-190a;hsa-miR-190b;hsa-miR-582-5p][hsa-miR-190b;hsa-miR-3188;hsa-miR-582-5p][hsa-miR-190b;hsa-miR-519b-3p;hsa-miR-582-5p][hsa-miR-190b;hsa-miR-548v;hsa-miR-582-5p][hsa-miR-190b;hsa-miR-582-5p]
BOD1	8	[hsa-miR-1297;hsa-miR-142-3p;hsa-miR-20b-3p][hsa-miR-1297;hsa-miR-26b-5p][hsa-miR-142-3p;hsa-miR-20b-3p][hsa-miR-142-3p;hsa-miR-20b-3p;hsa-miR-26b-5p][hsa-miR-142-3p;hsa-miR-26a-5p][hsa-miR-142-3p;hsa-miR-26b-5p][hsa-miR-26a-5p;hsa-miR-26b-5p;hsa-miR-411-3p][hsa-miR-26b-5p;hsa-miR-411-3p]
BOD1L1	4	[hsa-miR-106b-5p;hsa-miR-3065-5p][hsa-miR-19b-1-5p;hsa-miR-410][hsa-miR-19b-1-5p;hsa-miR-410;hsa-miR-513a-5p][hsa-miR-27a-3p;hsa-miR-30d-5p]
BOLA1	1	[hsa-miR-1269a;hsa-miR-942]
BOLA3	5	[hsa-miR-195-5p;hsa-miR-369-3p;hsa-miR-424-5p][hsa-miR-195-5p;hsa-miR-424-5p][hsa-miR-3121-3p;hsa-miR-556-5p][hsa-miR-3143;hsa-miR-369-3p;hsa-miR-374b-5p][hsa-miR-3143;hsa-miR-374b-5p]
BOLL	9	[hsa-let-7c;hsa-miR-1287;hsa-miR-1294][hsa-miR-1287;hsa-miR-1294][hsa-miR-1287;hsa-miR-1294;hsa-miR-202-3p][hsa-miR-1287;hsa-miR-1294;hsa-miR-22-3p][hsa-miR-1287;hsa-miR-1294;hsa-miR-32-3p][hsa-miR-1287;hsa-miR-1294;hsa-miR-369-3p][hsa-miR-1287;hsa-miR-1294;hsa-miR-3919][hsa-miR-1287;hsa-miR-1294;hsa-miR-3938][hsa-miR-1287;hsa-miR-98]
BORA	3	[hsa-miR-23a-3p;hsa-miR-3161][hsa-miR-23a-3p;hsa-miR-3161;hsa-miR-335-3p][hsa-miR-23c;hsa-miR-3161;hsa-miR-335-3p]
BPGM	6	[hsa-miR-2116-3p;hsa-miR-3922-3p;hsa-miR-542-5p][hsa-miR-3176;hsa-miR-3922-3p][hsa-miR-3176;hsa-miR-3922-3p;hsa-miR-542-5p][hsa-miR-3680-3p;hsa-miR-3922-3p;hsa-miR-628-3p][hsa-miR-3922-3p;hsa-miR-542-5p][hsa-miR-3922-3p;hsa-miR-542-5p;hsa-miR-628-3p]
BPI	1	[hsa-miR-329;hsa-miR-362-3p]
BPIFB2	4	[hsa-miR-1301;hsa-miR-382-5p][hsa-miR-203;hsa-miR-2355-5p;hsa-miR-421][hsa-miR-2355-5p;hsa-miR-382-5p;hsa-miR-421][hsa-miR-2355-5p;hsa-miR-421]
BPIFC	1	[hsa-miR-188-5p;hsa-miR-676-3p]
BPNT1	1	[hsa-miR-18b-3p;hsa-miR-206]
BPTF	5	[hsa-miR-130b-3p;hsa-miR-29a-3p][hsa-miR-148a-5p;hsa-miR-301b][hsa-miR-149-3p;hsa-miR-431-3p][hsa-miR-153;hsa-miR-518f-5p][hsa-miR-3126-3p;hsa-miR-454-3p]
BRAF	1	[hsa-miR-1976;hsa-miR-744-3p]
BRAP	8	[hsa-miR-181a-5p;hsa-miR-181b-5p;hsa-miR-224-3p][hsa-miR-181a-5p;hsa-miR-214-3p;hsa-miR-224-3p][hsa-miR-181b-5p;hsa-miR-224-3p;hsa-miR-9-5p][hsa-miR-214-3p;hsa-miR-224-3p][hsa-miR-214-3p;hsa-miR-224-3p;hsa-miR-3140-3p][hsa-miR-214-3p;hsa-miR-224-3p;hsa-miR-3187-3p][hsa-miR-214-3p;hsa-miR-224-3p;hsa-miR-3619-5p][hsa-miR-214-3p;hsa-miR-224-3p;hsa-miR-588]
BRCA1	6	[hsa-miR-103a-2-5p;hsa-miR-224-5p;hsa-miR-616-5p][hsa-miR-221-5p;hsa-miR-3615;hsa-miR-379-5p][hsa-miR-224-5p;hsa-miR-379-5p;hsa-miR-92a-2-5p][hsa-miR-224-5p;hsa-miR-616-5p][hsa-miR-3615;hsa-miR-379-5p][hsa-miR-379-5p;hsa-miR-92a-2-5p]
BRCA2	1	[hsa-miR-1224-3p;hsa-miR-146b-5p]
BRCC3	1	[hsa-miR-1269a;hsa-miR-452-3p]
BRD1	6	[hsa-let-7b-3p;hsa-miR-126-3p;hsa-miR-365a-3p][hsa-let-7b-3p;hsa-miR-365a-3p][hsa-miR-20a-5p;hsa-miR-30a-5p][hsa-miR-20a-5p;hsa-miR-30a-5p;hsa-miR-889][hsa-miR-214-5p;hsa-miR-935][hsa-miR-543;hsa-miR-935]
BRD2	6	[hsa-miR-1248;hsa-miR-34a-3p][hsa-miR-3065-5p;hsa-miR-34a-3p;hsa-miR-7-1-3p][hsa-miR-3150a-3p;hsa-miR-486-3p][hsa-miR-34a-3p;hsa-miR-7-1-3p][hsa-miR-34c-3p;hsa-miR-3613-3p][hsa-miR-34c-3p;hsa-miR-3613-3p;hsa-miR-615-5p]
BRD3	4	[hsa-miR-10b-3p;hsa-miR-126-5p;hsa-miR-96-5p][hsa-miR-10b-3p;hsa-miR-96-5p][hsa-miR-154-3p;hsa-miR-365a-3p][hsa-miR-17-5p;hsa-miR-96-5p]
BRD4	7	[hsa-miR-185-5p;hsa-miR-20a-3p][hsa-miR-19b-2-5p;hsa-miR-3188;hsa-miR-3190-5p][hsa-miR-20a-3p;hsa-miR-3150b-3p][hsa-miR-20a-3p;hsa-miR-3150b-3p;hsa-miR-3926][hsa-miR-20a-3p;hsa-miR-3150b-3p;hsa-miR-505-3p][hsa-miR-3166;hsa-miR-3188][hsa-miR-3188;hsa-miR-3190-5p]
BRD7	4	[hsa-miR-3653;hsa-miR-576-5p][hsa-miR-493-5p;hsa-miR-576-5p][hsa-miR-548l;hsa-miR-576-5p][hsa-miR-576-5p;hsa-miR-889]
BRD8	7	[hsa-miR-140-5p;hsa-miR-29b-2-5p;hsa-miR-324-3p][hsa-miR-15b-5p;hsa-miR-221-3p][hsa-miR-187-5p;hsa-miR-221-3p][hsa-miR-221-3p;hsa-miR-29b-2-5p][hsa-miR-29b-2-5p;hsa-miR-301b][hsa-miR-29b-2-5p;hsa-miR-301b;hsa-miR-324-3p][hsa-miR-29b-2-5p;hsa-miR-324-3p]
BRD9	1	[hsa-miR-1276;hsa-miR-628-5p;hsa-miR-93-3p]
BRDT	4	[hsa-miR-452-5p;hsa-miR-570-3p;hsa-miR-664-3p][hsa-miR-452-5p;hsa-miR-579][hsa-miR-452-5p;hsa-miR-579;hsa-miR-664-3p][hsa-miR-452-5p;hsa-miR-664-3p]
BRE	6	[hsa-miR-135b-5p;hsa-miR-182-5p][hsa-miR-135b-5p;hsa-miR-203][hsa-miR-135b-5p;hsa-miR-873-5p][hsa-miR-3190-5p;hsa-miR-455-5p][hsa-miR-320d;hsa-miR-455-5p][hsa-miR-449a;hsa-miR-455-5p]
BRF2	7	[hsa-let-7a-2-3p;hsa-miR-338-5p][hsa-let-7a-2-3p;hsa-miR-338-5p;hsa-miR-548b-3p][hsa-let-7a-2-3p;hsa-miR-338-5p;hsa-miR-889][hsa-let-7e-5p;hsa-miR-338-5p][hsa-let-7e-5p;hsa-miR-3680-3p;hsa-miR-374b-3p][hsa-let-7e-5p;hsa-miR-374b-3p][hsa-let-7e-5p;hsa-miR-508-5p]
BRI3	6	[hsa-let-7a-2-3p;hsa-miR-200c-5p;hsa-miR-455-3p][hsa-miR-200c-5p;hsa-miR-455-3p][hsa-miR-323a-3p;hsa-miR-493-5p;hsa-miR-548s][hsa-miR-323a-3p;hsa-miR-548s][hsa-miR-342-5p;hsa-miR-373-3p;hsa-miR-455-3p][hsa-miR-342-5p;hsa-miR-455-3p]
BRI3BP	7	[hsa-miR-105-5p;hsa-miR-218-5p;hsa-miR-502-3p][hsa-miR-105-5p;hsa-miR-502-3p;hsa-miR-577][hsa-miR-218-5p;hsa-miR-502-3p][hsa-miR-501-3p;hsa-miR-550a-5p][hsa-miR-502-3p;hsa-miR-548d-3p;hsa-miR-577][hsa-miR-502-3p;hsa-miR-577][hsa-miR-550a-5p;hsa-miR-577]
BRIP1	1	[hsa-miR-10a-3p;hsa-miR-28-3p]
BRIX1	5	[hsa-miR-187-5p;hsa-miR-548b-5p;hsa-miR-548j][hsa-miR-187-5p;hsa-miR-548l][hsa-miR-466;hsa-miR-548b-5p][hsa-miR-548b-5p;hsa-miR-548j][hsa-miR-548b-5p;hsa-miR-548j;hsa-miR-548l]
BRK1	5	[hsa-miR-146b-3p;hsa-miR-3128][hsa-miR-146b-3p;hsa-miR-542-3p;hsa-miR-577][hsa-miR-146b-3p;hsa-miR-577][hsa-miR-3128;hsa-miR-3129-5p][hsa-miR-3128;hsa-miR-3162-5p]
BRMS1L	7	[hsa-miR-1271-5p;hsa-miR-191-5p;hsa-miR-543][hsa-miR-1271-5p;hsa-miR-543][hsa-miR-200c-3p;hsa-miR-497-5p;hsa-miR-543][hsa-miR-21-5p;hsa-miR-92a-3p][hsa-miR-3916;hsa-miR-767-5p][hsa-miR-429;hsa-miR-543][hsa-miR-497-5p;hsa-miR-543]
BRP44	2	[hsa-miR-20a-3p;hsa-miR-548t-5p][hsa-miR-20a-3p;hsa-miR-548t-5p;hsa-miR-561-3p]
BRP44L	4	[hsa-miR-124-3p;hsa-miR-137][hsa-miR-124-3p;hsa-miR-3910][hsa-miR-124-3p;hsa-miR-3910;hsa-miR-7-1-3p][hsa-miR-124-3p;hsa-miR-7-1-3p]
BRPF1	8	[hsa-miR-1291;hsa-miR-301a-3p][hsa-miR-152;hsa-miR-455-3p][hsa-miR-193a-3p;hsa-miR-301a-3p][hsa-miR-193a-3p;hsa-miR-301a-3p;hsa-miR-301b][hsa-miR-301a-3p;hsa-miR-455-3p][hsa-miR-3150b-3p;hsa-miR-455-3p;hsa-miR-935][hsa-miR-455-3p;hsa-miR-488-5p;hsa-miR-935][hsa-miR-455-3p;hsa-miR-935]
BRPF3	8	[hsa-let-7b-3p;hsa-miR-200a-5p;hsa-miR-656][hsa-let-7b-3p;hsa-miR-22-5p;hsa-miR-365a-3p][hsa-let-7b-3p;hsa-miR-618][hsa-let-7b-3p;hsa-miR-656][hsa-miR-1283;hsa-miR-22-5p;hsa-miR-96-5p][hsa-miR-22-5p;hsa-miR-365a-3p][hsa-miR-22-5p;hsa-miR-365a-3p;hsa-miR-3664-5p][hsa-miR-22-5p;hsa-miR-96-5p]
BRSK1	6	[hsa-miR-10b-3p;hsa-miR-3616-3p][hsa-miR-10b-3p;hsa-miR-486-3p][hsa-miR-1247-5p;hsa-miR-146b-3p;hsa-miR-486-3p][hsa-miR-1247-5p;hsa-miR-486-3p][hsa-miR-2115-3p;hsa-miR-224-5p][hsa-miR-2115-3p;hsa-miR-224-5p;hsa-miR-3124-5p]
BRSK2	6	[hsa-miR-101-3p;hsa-miR-144-3p;hsa-miR-497-3p][hsa-miR-101-3p;hsa-miR-497-3p][hsa-miR-1286;hsa-miR-561-3p][hsa-miR-144-3p;hsa-miR-340-5p;hsa-miR-497-3p][hsa-miR-144-3p;hsa-miR-497-3p][hsa-miR-497-3p;hsa-miR-548d-3p]
BRWD1	4	[hsa-miR-124-3p;hsa-miR-513b][hsa-miR-1256;hsa-miR-23a-3p;hsa-miR-3692-3p][hsa-miR-125a-5p;hsa-miR-7-5p][hsa-miR-23a-3p;hsa-miR-3692-3p]
BRWD3	8	[hsa-miR-1271-5p;hsa-miR-16-1-3p;hsa-miR-29a-3p][hsa-miR-15a-5p;hsa-miR-18a-5p;hsa-miR-29a-3p][hsa-miR-16-1-3p;hsa-miR-29a-3p][hsa-miR-16-1-3p;hsa-miR-29a-3p;hsa-miR-548f][hsa-miR-18a-5p;hsa-miR-29a-3p;hsa-miR-33a-5p][hsa-miR-18a-5p;hsa-miR-29a-3p;hsa-miR-3664-5p][hsa-miR-18a-5p;hsa-miR-29a-3p;hsa-miR-454-3p][hsa-miR-29a-3p;hsa-miR-3689a-5p]
BSDC1	7	[hsa-miR-155-5p;hsa-miR-15a-5p][hsa-miR-15b-5p;hsa-miR-186-5p][hsa-miR-15b-5p;hsa-miR-25-3p;hsa-miR-374b-5p][hsa-miR-15b-5p;hsa-miR-33a-5p][hsa-miR-15b-5p;hsa-miR-374b-5p][hsa-miR-15b-5p;hsa-miR-374b-5p;hsa-miR-767-5p][hsa-miR-214-3p;hsa-miR-29c-3p]
BSN	6	[hsa-let-7f-1-3p;hsa-miR-1179;hsa-miR-16-5p][hsa-let-7f-5p;hsa-miR-1][hsa-let-7f-5p;hsa-miR-30d-5p][hsa-miR-148a-3p;hsa-miR-153;hsa-miR-206][hsa-miR-153;hsa-miR-206][hsa-miR-153;hsa-miR-508-3p]
BSPRY	1	[hsa-miR-449a;hsa-miR-449b-5p]
BST1	1	[hsa-miR-579;hsa-miR-592]
BTAF1	7	[hsa-let-7a-2-3p;hsa-miR-3653][hsa-miR-101-3p;hsa-miR-144-5p;hsa-miR-22-5p][hsa-miR-101-3p;hsa-miR-22-5p][hsa-miR-1226-3p;hsa-miR-3194-5p;hsa-miR-3662][hsa-miR-148a-5p;hsa-miR-3662][hsa-miR-155-5p;hsa-miR-3194-5p;hsa-miR-3662][hsa-miR-3194-5p;hsa-miR-3662]
BTBD1	9	[hsa-let-7a-3p;hsa-let-7f-1-3p;hsa-miR-492][hsa-let-7a-3p;hsa-miR-137;hsa-miR-492][hsa-let-7a-3p;hsa-miR-492][hsa-let-7a-3p;hsa-miR-492;hsa-miR-590-3p][hsa-let-7b-3p;hsa-miR-1248;hsa-miR-492][hsa-miR-103a-2-5p;hsa-miR-1248;hsa-miR-492][hsa-miR-1248;hsa-miR-132-3p;hsa-miR-492][hsa-miR-1248;hsa-miR-2113;hsa-miR-492][hsa-miR-1248;hsa-miR-492]
BTBD10	5	[hsa-miR-124-3p;hsa-miR-148b-3p][hsa-miR-1253;hsa-miR-148a-3p][hsa-miR-129-2-3p;hsa-miR-148b-3p;hsa-miR-421][hsa-miR-148a-3p;hsa-miR-548b-3p][hsa-miR-148b-3p;hsa-miR-421]
BTBD11	6	[hsa-miR-1229;hsa-miR-124-3p][hsa-miR-1229;hsa-miR-607][hsa-miR-18a-3p;hsa-miR-197-3p;hsa-miR-580][hsa-miR-197-3p;hsa-miR-374a-5p;hsa-miR-580][hsa-miR-197-3p;hsa-miR-374b-5p;hsa-miR-580][hsa-miR-197-3p;hsa-miR-580]
BTBD3	7	[hsa-miR-140-3p;hsa-miR-149-5p;hsa-miR-466][hsa-miR-140-3p;hsa-miR-25-5p;hsa-miR-466][hsa-miR-140-3p;hsa-miR-466][hsa-miR-140-3p;hsa-miR-466;hsa-miR-877-3p][hsa-miR-20a-5p;hsa-miR-548v][hsa-miR-3684;hsa-miR-934][hsa-miR-4326;hsa-miR-466]
BTBD7	6	[hsa-let-7b-3p;hsa-miR-106b-5p][hsa-miR-101-3p;hsa-miR-130a-5p][hsa-miR-106b-5p;hsa-miR-182-5p][hsa-miR-130a-5p;hsa-miR-30c-5p][hsa-miR-182-5p;hsa-miR-29a-3p;hsa-miR-625-3p][hsa-miR-29a-3p;hsa-miR-625-3p]
BTBD9	5	[hsa-let-7a-5p;hsa-let-7f-5p;hsa-miR-660-5p][hsa-let-7a-5p;hsa-miR-660-5p][hsa-let-7g-5p;hsa-miR-495;hsa-miR-660-5p][hsa-let-7g-5p;hsa-miR-495;hsa-miR-7-1-3p][hsa-miR-660-5p;hsa-miR-939]
BTC	7	[hsa-miR-323a-3p;hsa-miR-378a-5p;hsa-miR-548y][hsa-miR-323a-3p;hsa-miR-548b-5p;hsa-miR-548y][hsa-miR-323a-3p;hsa-miR-934][hsa-miR-378a-5p;hsa-miR-548y][hsa-miR-548a-5p;hsa-miR-934][hsa-miR-548b-5p;hsa-miR-548y][hsa-miR-548y;hsa-miR-934]
BTF3	4	[hsa-miR-103a-2-5p;hsa-miR-22-3p;hsa-miR-449a][hsa-miR-105-5p;hsa-miR-17-5p][hsa-miR-2115-3p;hsa-miR-34c-5p][hsa-miR-22-3p;hsa-miR-449a]
BTF3L4	6	[hsa-miR-106b-3p;hsa-miR-452-5p][hsa-miR-1236;hsa-miR-193a-5p;hsa-miR-676-3p][hsa-miR-1236;hsa-miR-676-3p][hsa-miR-19b-3p;hsa-miR-877-3p][hsa-miR-495;hsa-miR-603;hsa-miR-676-3p][hsa-miR-603;hsa-miR-676-3p]
BTG1	7	[hsa-miR-183-3p;hsa-miR-30c-2-3p][hsa-miR-183-3p;hsa-miR-30c-2-3p;hsa-miR-501-5p][hsa-miR-183-3p;hsa-miR-30c-2-3p;hsa-miR-642a-5p][hsa-miR-183-3p;hsa-miR-642a-5p][hsa-miR-224-5p;hsa-miR-2355-5p][hsa-miR-224-5p;hsa-miR-2355-5p;hsa-miR-26b-5p][hsa-miR-26a-5p;hsa-miR-30c-2-3p]
BTG2	7	[hsa-miR-125b-2-3p;hsa-miR-590-5p][hsa-miR-195-5p;hsa-miR-590-5p][hsa-miR-212-3p;hsa-miR-27a-3p;hsa-miR-29c-3p][hsa-miR-27a-3p;hsa-miR-29c-3p][hsa-miR-339-3p;hsa-miR-363-3p;hsa-miR-590-5p][hsa-miR-363-3p;hsa-miR-579;hsa-miR-590-5p][hsa-miR-363-3p;hsa-miR-590-5p]
BTG3	7	[hsa-let-7i-3p;hsa-miR-199b-5p][hsa-miR-18a-5p;hsa-miR-195-3p;hsa-miR-574-3p][hsa-miR-18a-5p;hsa-miR-449a;hsa-miR-574-3p][hsa-miR-18a-5p;hsa-miR-532-5p][hsa-miR-18a-5p;hsa-miR-574-3p][hsa-miR-18a-5p;hsa-miR-7-2-3p][hsa-miR-93-5p;hsa-miR-934]
BTG4	6	[hsa-miR-1248;hsa-miR-34b-5p][hsa-miR-1248;hsa-miR-449a][hsa-miR-34b-5p;hsa-miR-34c-5p;hsa-miR-484][hsa-miR-34b-5p;hsa-miR-3620][hsa-miR-34b-5p;hsa-miR-3620;hsa-miR-484][hsa-miR-34b-5p;hsa-miR-484]
BTK	5	[hsa-miR-1323;hsa-miR-150-5p][hsa-miR-1323;hsa-miR-150-5p;hsa-miR-592][hsa-miR-150-5p;hsa-miR-2115-3p;hsa-miR-374a-3p][hsa-miR-150-5p;hsa-miR-374a-3p][hsa-miR-2115-3p;hsa-miR-374a-3p]
BTLA	8	[hsa-miR-103a-3p;hsa-miR-150-5p][hsa-miR-103a-3p;hsa-miR-150-5p;hsa-miR-548j][hsa-miR-142-3p;hsa-miR-150-5p;hsa-miR-15b-5p][hsa-miR-150-5p;hsa-miR-15a-5p][hsa-miR-150-5p;hsa-miR-15a-5p;hsa-miR-214-3p][hsa-miR-150-5p;hsa-miR-15a-5p;hsa-miR-4306][hsa-miR-150-5p;hsa-miR-15b-5p][hsa-miR-150-5p;hsa-miR-15b-5p;hsa-miR-767-5p]
BTN1A1	4	[hsa-miR-15a-5p;hsa-miR-497-5p][hsa-miR-16-5p;hsa-miR-455-5p;hsa-miR-497-5p][hsa-miR-16-5p;hsa-miR-497-5p][hsa-miR-195-5p;hsa-miR-497-5p]
BTN2A1	4	[hsa-miR-143-3p;hsa-miR-3183][hsa-miR-143-3p;hsa-miR-3183;hsa-miR-581][hsa-miR-143-3p;hsa-miR-516b-5p;hsa-miR-581][hsa-miR-143-3p;hsa-miR-581]
BTN2A2	3	[hsa-miR-2355-5p;hsa-miR-362-3p;hsa-miR-610][hsa-miR-3607-5p;hsa-miR-362-3p;hsa-miR-3660][hsa-miR-362-3p;hsa-miR-610]
BTN3A1	4	[hsa-miR-142-3p;hsa-miR-150-5p][hsa-miR-142-3p;hsa-miR-150-5p;hsa-miR-361-3p][hsa-miR-142-3p;hsa-miR-744-3p][hsa-miR-150-5p;hsa-miR-744-3p]
BTN3A2	6	[hsa-miR-106a-5p;hsa-miR-142-3p][hsa-miR-106a-5p;hsa-miR-20a-5p;hsa-miR-93-5p][hsa-miR-106a-5p;hsa-miR-93-5p][hsa-miR-142-3p;hsa-miR-20a-5p;hsa-miR-361-3p][hsa-miR-142-3p;hsa-miR-20a-5p;hsa-miR-93-5p][hsa-miR-20a-5p;hsa-miR-93-5p]
BTN3A3	1	[hsa-miR-150-5p;hsa-miR-934]
BTNL3	2	[hsa-miR-24-3p;hsa-miR-412][hsa-miR-24-3p;hsa-miR-654-5p]
BTNL8	2	[hsa-miR-142-3p;hsa-miR-671-5p;hsa-miR-934][hsa-miR-142-3p;hsa-miR-7-5p;hsa-miR-934]
BTRC	6	[hsa-miR-1245a;hsa-miR-135a-5p][hsa-miR-135a-5p;hsa-miR-424-5p][hsa-miR-135b-5p;hsa-miR-224-5p][hsa-miR-135b-5p;hsa-miR-224-5p;hsa-miR-744-3p][hsa-miR-195-5p;hsa-miR-548d-3p][hsa-miR-455-3p;hsa-miR-548d-3p;hsa-miR-96-3p]
BUB3	7	[hsa-miR-203;hsa-miR-30e-3p][hsa-miR-203;hsa-miR-30e-3p;hsa-miR-3130-3p][hsa-miR-219-2-3p;hsa-miR-30d-5p][hsa-miR-221-3p;hsa-miR-3667-5p][hsa-miR-30d-5p;hsa-miR-30e-5p][hsa-miR-30d-5p;hsa-miR-323b-3p][hsa-miR-30e-3p;hsa-miR-605]
BUD13	1	[hsa-miR-455-3p;hsa-miR-720]
BUD31	5	[hsa-miR-125b-2-3p;hsa-miR-19b-1-5p][hsa-miR-125b-2-3p;hsa-miR-19b-1-5p;hsa-miR-520d-5p][hsa-miR-19b-1-5p;hsa-miR-499a-3p][hsa-miR-19b-1-5p;hsa-miR-499a-3p;hsa-miR-520d-5p][hsa-miR-19b-1-5p;hsa-miR-520d-5p]
BVES	4	[hsa-miR-18a-5p;hsa-miR-29a-3p;hsa-miR-29b-3p][hsa-miR-29a-3p;hsa-miR-29b-3p][hsa-miR-29a-3p;hsa-miR-29b-3p;hsa-miR-29c-3p][hsa-miR-29a-3p;hsa-miR-616-5p]
BZRAP1	8	[hsa-miR-1270;hsa-miR-130a-3p;hsa-miR-22-3p][hsa-miR-1270;hsa-miR-22-3p][hsa-miR-1270;hsa-miR-3150b-3p;hsa-miR-454-3p][hsa-miR-22-3p;hsa-miR-28-5p][hsa-miR-28-5p;hsa-miR-3150b-3p][hsa-miR-3150b-3p;hsa-miR-454-3p][hsa-miR-3150b-3p;hsa-miR-548b-5p][hsa-miR-3150b-3p;hsa-miR-548b-5p;hsa-miR-7-5p]
BZW1	6	[hsa-let-7g-5p;hsa-miR-205-3p][hsa-let-7g-5p;hsa-miR-205-3p;hsa-miR-616-3p][hsa-let-7g-5p;hsa-miR-3609][hsa-miR-126-5p;hsa-miR-183-5p;hsa-miR-934][hsa-miR-146a-5p;hsa-miR-20b-5p;hsa-miR-632][hsa-miR-183-5p;hsa-miR-934]
BZW2	7	[hsa-let-7g-5p;hsa-miR-616-5p][hsa-miR-105-5p;hsa-miR-135a-5p;hsa-miR-616-5p][hsa-miR-1179;hsa-miR-135a-5p;hsa-miR-616-5p][hsa-miR-135a-5p;hsa-miR-520g;hsa-miR-616-5p][hsa-miR-135a-5p;hsa-miR-616-5p][hsa-miR-181b-5p;hsa-miR-548f][hsa-miR-29b-1-5p;hsa-miR-616-5p]
C10orf107	3	[hsa-miR-185-3p;hsa-miR-548a-5p;hsa-miR-548b-5p][hsa-miR-185-3p;hsa-miR-548j;hsa-miR-548t-5p][hsa-miR-548j;hsa-miR-548t-5p]
C10orf113	7	[hsa-miR-1237;hsa-miR-204-5p;hsa-miR-9-5p][hsa-miR-204-5p;hsa-miR-2115-5p;hsa-miR-9-5p][hsa-miR-204-5p;hsa-miR-3140-3p;hsa-miR-9-5p][hsa-miR-204-5p;hsa-miR-3144-3p][hsa-miR-204-5p;hsa-miR-3144-3p;hsa-miR-3614-3p][hsa-miR-204-5p;hsa-miR-3614-3p;hsa-miR-9-5p][hsa-miR-204-5p;hsa-miR-9-5p]
C10orf114	7	[hsa-miR-106a-5p;hsa-miR-516a-5p][hsa-miR-128;hsa-miR-20b-5p][hsa-miR-20b-5p;hsa-miR-27a-3p][hsa-miR-20b-5p;hsa-miR-27a-3p;hsa-miR-27b-3p][hsa-miR-27a-3p;hsa-miR-516a-5p][hsa-miR-335-3p;hsa-miR-424-3p;hsa-miR-452-5p][hsa-miR-424-3p;hsa-miR-452-5p]
C10orf118	7	[hsa-let-7g-3p;hsa-miR-3161][hsa-let-7g-3p;hsa-miR-3161;hsa-miR-92b-3p][hsa-miR-25-3p;hsa-miR-26a-1-3p;hsa-miR-32-5p][hsa-miR-25-3p;hsa-miR-26a-2-3p;hsa-miR-32-5p][hsa-miR-26a-2-3p;hsa-miR-32-5p][hsa-miR-26a-2-3p;hsa-miR-32-5p;hsa-miR-335-3p][hsa-miR-26a-2-3p;hsa-miR-32-5p;hsa-miR-92b-3p]
C10orf12	7	[hsa-miR-101-3p;hsa-miR-130b-3p][hsa-miR-101-3p;hsa-miR-130b-3p;hsa-miR-3615][hsa-miR-101-3p;hsa-miR-155-5p][hsa-miR-101-3p;hsa-miR-3140-3p;hsa-miR-489][hsa-miR-101-3p;hsa-miR-410;hsa-miR-489][hsa-miR-101-3p;hsa-miR-489][hsa-miR-155-5p;hsa-miR-455-5p]
C10orf131	7	[hsa-miR-1271-5p;hsa-miR-34c-5p;hsa-miR-3614-3p][hsa-miR-141-5p;hsa-miR-205-5p;hsa-miR-34c-5p][hsa-miR-141-5p;hsa-miR-34c-5p][hsa-miR-149-5p;hsa-miR-34c-5p][hsa-miR-34c-5p;hsa-miR-3614-3p;hsa-miR-519a-5p][hsa-miR-34c-5p;hsa-miR-452-3p][hsa-miR-34c-5p;hsa-miR-519a-5p]
C10orf137	4	[hsa-miR-128;hsa-miR-181a-2-3p][hsa-miR-128;hsa-miR-181a-2-3p;hsa-miR-498][hsa-miR-181a-2-3p;hsa-miR-26a-5p;hsa-miR-330-3p][hsa-miR-181a-2-3p;hsa-miR-26a-5p;hsa-miR-506-3p]
C10orf2	5	[hsa-miR-22-5p;hsa-miR-362-5p][hsa-miR-22-5p;hsa-miR-362-5p;hsa-miR-9-5p][hsa-miR-22-5p;hsa-miR-653][hsa-miR-362-5p;hsa-miR-383;hsa-miR-9-5p][hsa-miR-362-5p;hsa-miR-9-5p]
C10orf32	3	[hsa-miR-17-3p;hsa-miR-31-5p;hsa-miR-524-5p][hsa-miR-17-3p;hsa-miR-3176;hsa-miR-3922-3p][hsa-miR-17-3p;hsa-miR-3922-3p]
C10orf53	1	[hsa-miR-188-3p;hsa-miR-205-5p]
C10orf57	1	[hsa-miR-3605-5p;hsa-miR-548t-5p]
C10orf67	1	[hsa-miR-224-5p;hsa-miR-3065-3p]
C10orf76	3	[hsa-miR-2355-5p;hsa-miR-30b-5p][hsa-miR-30c-5p;hsa-miR-30d-5p][hsa-miR-30d-5p;hsa-miR-33a-3p]
C10orf90	7	[hsa-miR-135a-5p;hsa-miR-135b-5p][hsa-miR-135b-5p;hsa-miR-194-3p;hsa-miR-196b-5p][hsa-miR-135b-5p;hsa-miR-196b-5p][hsa-miR-135b-5p;hsa-miR-196b-5p;hsa-miR-338-3p][hsa-miR-135b-5p;hsa-miR-196b-5p;hsa-miR-516a-5p][hsa-miR-135b-5p;hsa-miR-214-3p;hsa-miR-516a-5p][hsa-miR-135b-5p;hsa-miR-516a-5p]
C11orf10	4	[hsa-miR-20a-3p;hsa-miR-32-3p][hsa-miR-20a-3p;hsa-miR-32-3p;hsa-miR-548n][hsa-miR-32-3p;hsa-miR-520d-5p;hsa-miR-548n][hsa-miR-32-3p;hsa-miR-548n]
C11orf24	7	[hsa-miR-15a-5p;hsa-miR-15b-5p;hsa-miR-195-5p][hsa-miR-15b-5p;hsa-miR-195-5p][hsa-miR-15b-5p;hsa-miR-195-5p;hsa-miR-25-3p][hsa-miR-15b-5p;hsa-miR-195-5p;hsa-miR-424-5p][hsa-miR-15b-5p;hsa-miR-195-5p;hsa-miR-767-5p][hsa-miR-195-5p;hsa-miR-371a-5p][hsa-miR-29b-2-5p;hsa-miR-497-5p]
C11orf30	7	[hsa-miR-106b-5p;hsa-miR-338-3p][hsa-miR-155-5p;hsa-miR-338-3p][hsa-miR-155-5p;hsa-miR-338-3p;hsa-miR-676-3p][hsa-miR-16-1-3p;hsa-miR-200a-3p;hsa-miR-338-3p][hsa-miR-16-1-3p;hsa-miR-338-3p;hsa-miR-3646][hsa-miR-181c-5p;hsa-miR-451a][hsa-miR-338-3p;hsa-miR-3662]
C11orf31	4	[hsa-miR-3187-3p;hsa-miR-33a-3p;hsa-miR-588][hsa-miR-33a-3p;hsa-miR-409-3p;hsa-miR-588][hsa-miR-33a-3p;hsa-miR-588][hsa-miR-409-3p;hsa-miR-588]
C11orf41	4	[hsa-miR-181a-5p;hsa-miR-374a-3p][hsa-miR-181c-5p;hsa-miR-9-5p][hsa-miR-19a-5p;hsa-miR-374a-3p][hsa-miR-374a-3p;hsa-miR-9-5p]
C11orf42	6	[hsa-miR-103a-3p;hsa-miR-107;hsa-miR-1275][hsa-miR-107;hsa-miR-1275][hsa-miR-107;hsa-miR-625-5p][hsa-miR-1275;hsa-miR-15a-5p;hsa-miR-16-5p][hsa-miR-15a-5p;hsa-miR-16-5p][hsa-miR-3681-5p;hsa-miR-497-5p]
C11orf45	1	[hsa-miR-126-5p;hsa-miR-32-3p;hsa-miR-944]
C11orf49	7	[hsa-miR-1269a;hsa-miR-452-5p][hsa-miR-1269a;hsa-miR-452-5p;hsa-miR-891a][hsa-miR-138-5p;hsa-miR-3913-5p][hsa-miR-138-5p;hsa-miR-3913-5p;hsa-miR-653][hsa-miR-29b-2-5p;hsa-miR-378a-3p;hsa-miR-452-5p][hsa-miR-378a-3p;hsa-miR-452-5p][hsa-miR-452-5p;hsa-miR-512-3p]
C11orf54	1	[hsa-miR-16-1-3p;hsa-miR-29a-5p]
C11orf57	7	[hsa-miR-125a-5p;hsa-miR-500a-3p][hsa-miR-224-3p;hsa-miR-29b-3p;hsa-miR-874][hsa-miR-224-3p;hsa-miR-29c-3p][hsa-miR-224-3p;hsa-miR-29c-3p;hsa-miR-500a-3p][hsa-miR-29b-3p;hsa-miR-329;hsa-miR-874][hsa-miR-29b-3p;hsa-miR-874][hsa-miR-3614-5p;hsa-miR-500a-3p]
C11orf58	7	[hsa-miR-103a-2-5p;hsa-miR-194-5p;hsa-miR-374b-5p][hsa-miR-103a-2-5p;hsa-miR-33b-5p;hsa-miR-374b-5p][hsa-miR-103a-2-5p;hsa-miR-374b-5p][hsa-miR-1185-5p;hsa-miR-194-5p;hsa-miR-224-3p][hsa-miR-194-5p;hsa-miR-224-3p;hsa-miR-550b-3p][hsa-miR-374b-5p;hsa-miR-522-3p][hsa-miR-374b-5p;hsa-miR-9-5p]
C11orf63	2	[hsa-miR-133b;hsa-miR-449b-3p][hsa-miR-184;hsa-miR-449b-3p]
C11orf68	2	[hsa-miR-196a-5p;hsa-miR-203][hsa-miR-196a-5p;hsa-miR-203;hsa-miR-330-3p]
C11orf70	3	[hsa-miR-127-3p;hsa-miR-577][hsa-miR-127-3p;hsa-miR-577;hsa-miR-873-5p][hsa-miR-190b;hsa-miR-577]
C11orf73	2	[hsa-miR-141-5p;hsa-miR-223-3p;hsa-miR-590-3p][hsa-miR-548o-3p;hsa-miR-590-3p]
C11orf75	8	[hsa-miR-130a-5p;hsa-miR-224-5p;hsa-miR-23a-3p][hsa-miR-150-5p;hsa-miR-2114-5p;hsa-miR-3616-5p][hsa-miR-184;hsa-miR-224-5p;hsa-miR-23a-3p][hsa-miR-2114-5p;hsa-miR-3616-5p][hsa-miR-224-5p;hsa-miR-23a-3p][hsa-miR-224-5p;hsa-miR-23a-3p;hsa-miR-642a-5p][hsa-miR-224-5p;hsa-miR-23b-3p][hsa-miR-23a-3p;hsa-miR-3616-5p]
C11orf82	5	[hsa-miR-106a-5p;hsa-miR-106b-5p;hsa-miR-17-5p][hsa-miR-106a-5p;hsa-miR-17-5p][hsa-miR-142-5p;hsa-miR-17-5p;hsa-miR-520d-3p][hsa-miR-17-5p;hsa-miR-20a-5p;hsa-miR-577][hsa-miR-20b-5p;hsa-miR-577]
C11orf84	6	[hsa-let-7d-5p;hsa-let-7g-5p][hsa-let-7d-5p;hsa-let-7g-5p;hsa-miR-92a-2-5p][hsa-let-7g-5p;hsa-miR-196a-5p][hsa-miR-18a-5p;hsa-miR-3199][hsa-miR-196b-5p;hsa-miR-505-3p][hsa-miR-196b-5p;hsa-miR-505-3p;hsa-miR-765]
C11orf86	2	[hsa-miR-135b-5p;hsa-miR-223-3p;hsa-miR-664-5p][hsa-miR-135b-5p;hsa-miR-664-5p]
C11orf87	7	[hsa-miR-127-5p;hsa-miR-31-3p][hsa-miR-132-3p;hsa-miR-200c-5p;hsa-miR-31-3p][hsa-miR-136-3p;hsa-miR-29b-3p][hsa-miR-16-2-3p;hsa-miR-29b-3p][hsa-miR-16-2-3p;hsa-miR-29b-3p;hsa-miR-381][hsa-miR-200c-5p;hsa-miR-31-3p][hsa-miR-200c-5p;hsa-miR-31-3p;hsa-miR-885-5p]
C11orf88	5	[hsa-miR-3690;hsa-miR-582-3p][hsa-miR-3690;hsa-miR-582-3p;hsa-miR-643][hsa-miR-582-3p;hsa-miR-643][hsa-miR-582-3p;hsa-miR-643;hsa-miR-744-3p][hsa-miR-582-3p;hsa-miR-643;hsa-miR-934]
C11orf9	5	[hsa-let-7f-2-3p;hsa-miR-320c;hsa-miR-9-3p][hsa-miR-34a-5p;hsa-miR-449b-5p;hsa-miR-9-3p][hsa-miR-449b-5p;hsa-miR-9-3p][hsa-miR-519a-3p;hsa-miR-520a-3p;hsa-miR-9-3p][hsa-miR-519a-3p;hsa-miR-9-3p]
C11orf95	8	[hsa-let-7a-3p;hsa-miR-410;hsa-miR-802][hsa-let-7a-3p;hsa-miR-802][hsa-let-7f-1-3p;hsa-miR-21-5p;hsa-miR-802][hsa-miR-21-5p;hsa-miR-548s;hsa-miR-802][hsa-miR-21-5p;hsa-miR-802][hsa-miR-410;hsa-miR-802][hsa-miR-429;hsa-miR-555;hsa-miR-802][hsa-miR-429;hsa-miR-802]
C12orf23	7	[hsa-miR-106a-5p;hsa-miR-20a-5p][hsa-miR-106a-5p;hsa-miR-20a-5p;hsa-miR-221-5p][hsa-miR-148a-5p;hsa-miR-20b-5p;hsa-miR-548x-3p][hsa-miR-148a-5p;hsa-miR-548d-3p][hsa-miR-20a-5p;hsa-miR-20b-5p][hsa-miR-20a-5p;hsa-miR-20b-5p;hsa-miR-379-3p][hsa-miR-20a-5p;hsa-miR-20b-5p;hsa-miR-769-3p]
C12orf29	8	[hsa-let-7i-5p;hsa-miR-205-5p;hsa-miR-449a][hsa-miR-1270;hsa-miR-2355-3p;hsa-miR-573][hsa-miR-205-5p;hsa-miR-449a][hsa-miR-205-5p;hsa-miR-449b-5p][hsa-miR-205-5p;hsa-miR-539-5p][hsa-miR-205-5p;hsa-miR-670][hsa-miR-2355-3p;hsa-miR-573][hsa-miR-2355-3p;hsa-miR-589-3p]
C12orf35	4	[hsa-miR-130a-5p;hsa-miR-205-3p][hsa-miR-130a-5p;hsa-miR-26a-5p][hsa-miR-26a-5p;hsa-miR-26b-5p][hsa-miR-26b-5p;hsa-miR-499a-3p]
C12orf4	4	[hsa-miR-1255a;hsa-miR-130b-5p][hsa-miR-1255a;hsa-miR-130b-5p;hsa-miR-338-3p][hsa-miR-1260b;hsa-miR-130b-5p][hsa-miR-130b-5p;hsa-miR-338-3p]
C12orf42	7	[hsa-miR-1256;hsa-miR-449c-5p;hsa-miR-486-3p][hsa-miR-1267;hsa-miR-486-3p;hsa-miR-671-5p][hsa-miR-148b-3p;hsa-miR-513b][hsa-miR-222-3p;hsa-miR-3200-5p][hsa-miR-222-3p;hsa-miR-486-3p][hsa-miR-449c-5p;hsa-miR-486-3p][hsa-miR-486-3p;hsa-miR-671-5p]
C12orf49	3	[hsa-miR-323b-3p;hsa-miR-532-3p][hsa-miR-323b-3p;hsa-miR-532-3p;hsa-miR-942][hsa-miR-323b-3p;hsa-miR-942]
C12orf50	7	[hsa-miR-17-5p;hsa-miR-20a-3p;hsa-miR-338-3p][hsa-miR-19b-2-5p;hsa-miR-20a-3p;hsa-miR-338-3p][hsa-miR-20a-3p;hsa-miR-217][hsa-miR-20a-3p;hsa-miR-27a-3p][hsa-miR-20a-3p;hsa-miR-338-3p][hsa-miR-20a-3p;hsa-miR-338-3p;hsa-miR-450b-5p][hsa-miR-216a;hsa-miR-520a-3p]
C12orf51	6	[hsa-let-7a-3p;hsa-miR-374b-5p][hsa-let-7a-3p;hsa-miR-374b-5p;hsa-miR-507][hsa-let-7b-3p;hsa-miR-374b-5p;hsa-miR-98][hsa-let-7d-5p;hsa-miR-15b-5p][hsa-miR-16-2-3p;hsa-miR-374b-5p][hsa-miR-374b-5p;hsa-miR-98]
C12orf53	6	[hsa-miR-143-3p;hsa-miR-19b-3p;hsa-miR-28-5p][hsa-miR-143-3p;hsa-miR-19b-3p;hsa-miR-505-5p][hsa-miR-19b-3p;hsa-miR-28-5p][hsa-miR-19b-3p;hsa-miR-3185][hsa-miR-19b-3p;hsa-miR-505-5p][hsa-miR-369-3p;hsa-miR-574-5p]
C12orf56	3	[hsa-miR-181b-5p;hsa-miR-181d;hsa-miR-543][hsa-miR-181b-5p;hsa-miR-3143;hsa-miR-543][hsa-miR-181b-5p;hsa-miR-543]
C12orf59	2	[hsa-miR-188-3p;hsa-miR-449a;hsa-miR-616-5p][hsa-miR-188-3p;hsa-miR-616-5p]
C12orf65	1	[hsa-miR-155-5p;hsa-miR-584-5p]
C12orf68	6	[hsa-miR-10b-3p;hsa-miR-214-5p][hsa-miR-10b-3p;hsa-miR-935][hsa-miR-1251;hsa-miR-30d-3p;hsa-miR-766-3p][hsa-miR-1251;hsa-miR-766-3p][hsa-miR-145-3p;hsa-miR-205-5p][hsa-miR-205-5p;hsa-miR-34a-3p]
C12orf69	3	[hsa-miR-141-3p;hsa-miR-30a-3p][hsa-miR-141-3p;hsa-miR-30a-3p;hsa-miR-495][hsa-miR-30a-3p;hsa-miR-495]
C12orf70	1	[hsa-miR-33a-3p;hsa-miR-449b-3p]
C12orf74	7	[hsa-miR-125b-5p;hsa-miR-193b-3p;hsa-miR-449b-3p][hsa-miR-149-5p;hsa-miR-449b-3p][hsa-miR-193a-3p;hsa-miR-3922-3p;hsa-miR-449b-3p][hsa-miR-193a-3p;hsa-miR-449b-3p;hsa-miR-629-3p][hsa-miR-193b-3p;hsa-miR-449b-3p][hsa-miR-193b-3p;hsa-miR-449b-3p;hsa-miR-629-3p][hsa-miR-449b-3p;hsa-miR-651]
C12orf75	6	[hsa-miR-126-5p;hsa-miR-383][hsa-miR-126-5p;hsa-miR-383;hsa-miR-625-5p][hsa-miR-126-5p;hsa-miR-383;hsa-miR-653][hsa-miR-126-5p;hsa-miR-383;hsa-miR-656][hsa-miR-410;hsa-miR-526b-5p][hsa-miR-410;hsa-miR-526b-5p;hsa-miR-653]
C12orf76	6	[hsa-miR-103a-3p;hsa-miR-1258][hsa-miR-130a-5p;hsa-miR-29a-3p][hsa-miR-130a-5p;hsa-miR-29a-3p;hsa-miR-30a-5p][hsa-miR-16-5p;hsa-miR-30a-5p][hsa-miR-203;hsa-miR-30b-5p][hsa-miR-29c-3p;hsa-miR-30a-5p]
C12orf77	2	[hsa-miR-105-5p;hsa-miR-214-5p][hsa-miR-105-5p;hsa-miR-214-5p;hsa-miR-500a-5p]
C14orf1	3	[hsa-miR-126-5p;hsa-miR-455-3p;hsa-miR-500a-5p][hsa-miR-214-3p;hsa-miR-3619-5p][hsa-miR-4306;hsa-miR-455-3p;hsa-miR-500a-5p]
C14orf101	6	[hsa-miR-182-5p;hsa-miR-29a-3p][hsa-miR-185-3p;hsa-miR-425-5p][hsa-miR-18b-3p;hsa-miR-29a-3p][hsa-miR-29a-3p;hsa-miR-625-5p][hsa-miR-425-5p;hsa-miR-590-5p][hsa-miR-425-5p;hsa-miR-877-3p]
C14orf102	6	[hsa-miR-130a-5p;hsa-miR-374b-5p][hsa-miR-23a-3p;hsa-miR-23b-3p][hsa-miR-369-3p;hsa-miR-374b-5p;hsa-miR-410][hsa-miR-374a-5p;hsa-miR-374b-5p][hsa-miR-374b-5p;hsa-miR-379-3p][hsa-miR-374b-5p;hsa-miR-410]
C14orf109	6	[hsa-let-7g-3p;hsa-miR-17-3p][hsa-let-7g-3p;hsa-miR-17-3p;hsa-miR-34c-3p][hsa-let-7g-3p;hsa-miR-17-3p;hsa-miR-519e-5p][hsa-miR-17-3p;hsa-miR-186-5p;hsa-miR-767-5p][hsa-miR-17-3p;hsa-miR-767-5p][hsa-miR-17-3p;hsa-miR-933]
C14orf118	4	[hsa-miR-195-3p;hsa-miR-4254;hsa-miR-935][hsa-miR-195-3p;hsa-miR-449c-5p;hsa-miR-935][hsa-miR-195-3p;hsa-miR-935][hsa-miR-449c-5p;hsa-miR-935]
C14orf126	4	[hsa-miR-205-3p;hsa-miR-30e-3p][hsa-miR-30e-3p;hsa-miR-556-3p][hsa-miR-30e-3p;hsa-miR-556-3p;hsa-miR-556-5p][hsa-miR-30e-3p;hsa-miR-556-5p]
C14orf129	7	[hsa-miR-16-5p;hsa-miR-455-5p][hsa-miR-29b-2-5p;hsa-miR-3074-3p][hsa-miR-29b-2-5p;hsa-miR-323b-3p][hsa-miR-30b-5p;hsa-miR-323a-3p;hsa-miR-512-3p][hsa-miR-30b-5p;hsa-miR-3652;hsa-miR-512-3p][hsa-miR-30b-5p;hsa-miR-512-3p][hsa-miR-30d-5p;hsa-miR-455-5p]
C14orf133	4	[hsa-miR-1260b;hsa-miR-29a-3p][hsa-miR-1260b;hsa-miR-29a-3p;hsa-miR-3130-5p][hsa-miR-1260b;hsa-miR-29a-3p;hsa-miR-4254][hsa-miR-1260b;hsa-miR-29a-3p;hsa-miR-506-3p]
C14orf135	4	[hsa-miR-141-3p;hsa-miR-190b][hsa-miR-190b;hsa-miR-26b-3p][hsa-miR-190b;hsa-miR-26b-3p;hsa-miR-3187-3p][hsa-miR-190b;hsa-miR-33a-5p]
C14orf166	1	[hsa-miR-186-5p;hsa-miR-323a-5p]
C14orf169	5	[hsa-miR-1271-5p;hsa-miR-146a-3p;hsa-miR-495][hsa-miR-1271-5p;hsa-miR-146a-3p;hsa-miR-96-5p][hsa-miR-146a-3p;hsa-miR-495;hsa-miR-96-5p][hsa-miR-146a-3p;hsa-miR-514b-5p;hsa-miR-96-5p][hsa-miR-146a-3p;hsa-miR-96-5p]
C14orf2	1	[hsa-miR-148b-3p;hsa-miR-486-5p]
C14orf28	5	[hsa-miR-137;hsa-miR-493-5p][hsa-miR-205-5p;hsa-miR-493-5p][hsa-miR-34c-5p;hsa-miR-449b-5p;hsa-miR-93-5p][hsa-miR-449b-5p;hsa-miR-93-5p;hsa-miR-98][hsa-miR-452-3p;hsa-miR-493-5p]
C14orf37	5	[hsa-miR-15b-5p;hsa-miR-16-5p;hsa-miR-767-3p][hsa-miR-15b-5p;hsa-miR-381][hsa-miR-15b-5p;hsa-miR-381;hsa-miR-767-3p][hsa-miR-16-5p;hsa-miR-381][hsa-miR-16-5p;hsa-miR-767-3p]
C14orf39	1	[hsa-miR-101-3p;hsa-miR-126-5p]
C14orf45	6	[hsa-miR-199a-5p;hsa-miR-505-5p;hsa-miR-625-3p][hsa-miR-3127-5p;hsa-miR-3691-5p;hsa-miR-505-5p][hsa-miR-3127-5p;hsa-miR-505-5p][hsa-miR-3170;hsa-miR-505-5p;hsa-miR-625-3p][hsa-miR-505-5p;hsa-miR-581][hsa-miR-505-5p;hsa-miR-625-3p]
C14orf93	3	[hsa-miR-149-5p;hsa-miR-452-5p][hsa-miR-149-5p;hsa-miR-629-3p][hsa-miR-452-5p;hsa-miR-629-3p]
C15orf23	6	[hsa-miR-1251;hsa-miR-130b-5p][hsa-miR-1251;hsa-miR-324-3p;hsa-miR-576-5p][hsa-miR-130b-5p;hsa-miR-26b-3p][hsa-miR-130b-5p;hsa-miR-92a-1-5p][hsa-miR-324-3p;hsa-miR-576-5p][hsa-miR-324-3p;hsa-miR-576-5p;hsa-miR-934]
C15orf26	1	[hsa-miR-181c-5p;hsa-miR-532-3p]
C15orf27	5	[hsa-miR-127-5p;hsa-miR-1285-3p][hsa-miR-127-5p;hsa-miR-29c-3p][hsa-miR-1285-3p;hsa-miR-29c-3p;hsa-miR-767-5p][hsa-miR-1285-3p;hsa-miR-767-5p][hsa-miR-29c-3p;hsa-miR-767-5p]
C15orf29	7	[hsa-let-7f-2-3p;hsa-miR-3916][hsa-let-7f-5p;hsa-miR-30b-5p;hsa-miR-3916][hsa-let-7f-5p;hsa-miR-3916][hsa-miR-124-3p;hsa-miR-3916][hsa-miR-124-3p;hsa-miR-3916;hsa-miR-454-3p][hsa-miR-150-5p;hsa-miR-3916;hsa-miR-454-3p][hsa-miR-3916;hsa-miR-548a-5p]
C15orf32	4	[hsa-miR-326;hsa-miR-365a-3p;hsa-miR-377-5p][hsa-miR-326;hsa-miR-365a-3p;hsa-miR-512-5p][hsa-miR-365a-3p;hsa-miR-377-5p][hsa-miR-365a-3p;hsa-miR-377-5p;hsa-miR-512-5p]
C15orf39	3	[hsa-let-7a-5p;hsa-let-7i-5p][hsa-let-7b-5p;hsa-let-7d-5p;hsa-let-7e-5p][hsa-let-7b-5p;hsa-let-7d-5p;hsa-miR-98]
C15orf40	7	[hsa-miR-1270;hsa-miR-30e-3p;hsa-miR-361-3p][hsa-miR-1270;hsa-miR-3136-5p;hsa-miR-340-3p][hsa-miR-30a-3p;hsa-miR-30e-3p;hsa-miR-361-3p][hsa-miR-30a-3p;hsa-miR-3136-5p][hsa-miR-30e-3p;hsa-miR-3136-5p;hsa-miR-361-3p][hsa-miR-30e-3p;hsa-miR-361-3p][hsa-miR-3136-5p;hsa-miR-340-3p]
C15orf41	7	[hsa-miR-190b;hsa-miR-23a-3p;hsa-miR-3127-5p][hsa-miR-190b;hsa-miR-3127-5p][hsa-miR-190b;hsa-miR-3127-5p;hsa-miR-548a-5p][hsa-miR-190b;hsa-miR-3127-5p;hsa-miR-7-1-3p][hsa-miR-190b;hsa-miR-3168;hsa-miR-375][hsa-miR-190b;hsa-miR-375][hsa-miR-190b;hsa-miR-421]
C15orf48	3	[hsa-miR-143-5p;hsa-miR-28-3p][hsa-miR-143-5p;hsa-miR-28-3p;hsa-miR-33a-3p][hsa-miR-28-3p;hsa-miR-33a-3p]
C15orf53	1	[hsa-miR-130b-5p;hsa-miR-544b]
C15orf54	6	[hsa-miR-1248;hsa-miR-3130-5p;hsa-miR-337-3p][hsa-miR-150-5p;hsa-miR-1976;hsa-miR-3130-5p][hsa-miR-150-5p;hsa-miR-3130-5p][hsa-miR-150-5p;hsa-miR-3130-5p;hsa-miR-337-3p][hsa-miR-150-5p;hsa-miR-3130-5p;hsa-miR-449c-5p][hsa-miR-3130-5p;hsa-miR-337-3p]
C15orf55	1	[hsa-miR-1255a;hsa-miR-3183]
C15orf61	6	[hsa-miR-181a-2-3p;hsa-miR-3140-3p;hsa-miR-561-3p][hsa-miR-181a-2-3p;hsa-miR-3145-3p][hsa-miR-181a-2-3p;hsa-miR-376a-5p][hsa-miR-181a-2-3p;hsa-miR-452-3p][hsa-miR-3140-3p;hsa-miR-3613-3p;hsa-miR-376a-5p][hsa-miR-3140-3p;hsa-miR-376a-5p]
C15orf63	2	[hsa-miR-137;hsa-miR-3922-3p;hsa-miR-940][hsa-miR-3922-3p;hsa-miR-940]
C16orf45	5	[hsa-miR-150-5p;hsa-miR-221-3p;hsa-miR-224-5p][hsa-miR-221-3p;hsa-miR-224-5p][hsa-miR-221-3p;hsa-miR-3664-5p][hsa-miR-224-5p;hsa-miR-33a-3p][hsa-miR-326;hsa-miR-3664-5p]
C16orf46	1	[hsa-miR-3117-3p;hsa-miR-3934]
C16orf5	6	[hsa-miR-1283;hsa-miR-23b-3p;hsa-miR-508-5p][hsa-miR-128;hsa-miR-23b-3p;hsa-miR-508-5p][hsa-miR-128;hsa-miR-23b-3p;hsa-miR-542-3p][hsa-miR-23b-3p;hsa-miR-27a-3p;hsa-miR-508-5p][hsa-miR-23b-3p;hsa-miR-508-5p;hsa-miR-542-3p][hsa-miR-23b-3p;hsa-miR-542-3p]
C16orf52	8	[hsa-miR-16-5p;hsa-miR-30b-5p;hsa-miR-452-3p][hsa-miR-19b-1-5p;hsa-miR-429;hsa-miR-452-3p][hsa-miR-22-5p;hsa-miR-452-3p][hsa-miR-27b-3p;hsa-miR-30b-5p;hsa-miR-452-3p][hsa-miR-30a-5p;hsa-miR-452-3p][hsa-miR-30b-5p;hsa-miR-452-3p][hsa-miR-429;hsa-miR-452-3p][hsa-miR-452-3p;hsa-miR-581]
C16orf54	1	[hsa-miR-3202;hsa-miR-361-3p]
C16orf57	3	[hsa-miR-181a-3p;hsa-miR-2355-5p][hsa-miR-18a-3p;hsa-miR-2355-5p][hsa-miR-2355-5p;hsa-miR-767-3p]
C16orf58	2	[hsa-miR-34a-5p;hsa-miR-449a][hsa-miR-34a-5p;hsa-miR-449a;hsa-miR-765]
C16orf70	7	[hsa-let-7b-3p;hsa-miR-106a-5p][hsa-miR-106a-5p;hsa-miR-20a-5p][hsa-miR-106a-5p;hsa-miR-9-3p][hsa-miR-130a-3p;hsa-miR-130b-3p][hsa-miR-130a-3p;hsa-miR-193b-3p][hsa-miR-130a-3p;hsa-miR-193b-3p;hsa-miR-320a][hsa-miR-130a-3p;hsa-miR-193b-3p;hsa-miR-9-5p]
C16orf72	8	[hsa-miR-130a-5p;hsa-miR-374b-5p][hsa-miR-130a-5p;hsa-miR-374b-5p;hsa-miR-520g][hsa-miR-148a-3p;hsa-miR-18a-5p][hsa-miR-148b-3p;hsa-miR-18a-5p][hsa-miR-16-5p;hsa-miR-18a-5p][hsa-miR-16-5p;hsa-miR-18a-5p;hsa-miR-511][hsa-miR-323b-3p;hsa-miR-374b-5p;hsa-miR-499a-3p][hsa-miR-374b-5p;hsa-miR-499a-3p]
C16orf80	1	[hsa-miR-376c;hsa-miR-410;hsa-miR-577]
C16orf87	6	[hsa-miR-29b-3p;hsa-miR-29c-3p][hsa-miR-30d-5p;hsa-miR-488-5p;hsa-miR-767-5p][hsa-miR-30d-5p;hsa-miR-520a-5p][hsa-miR-30d-5p;hsa-miR-767-5p][hsa-miR-326;hsa-miR-330-5p][hsa-miR-326;hsa-miR-330-5p;hsa-miR-488-5p]
C16orf88	4	[hsa-miR-1275;hsa-miR-184;hsa-miR-29b-3p][hsa-miR-184;hsa-miR-29a-3p;hsa-miR-29b-3p][hsa-miR-29a-3p;hsa-miR-29b-3p;hsa-miR-660-5p][hsa-miR-29a-3p;hsa-miR-29c-3p]
C16orf89	4	[hsa-miR-1224-5p;hsa-miR-3157-5p][hsa-miR-1224-5p;hsa-miR-3157-5p;hsa-miR-671-5p][hsa-miR-1224-5p;hsa-miR-671-5p][hsa-miR-3157-5p;hsa-miR-671-5p]
C16orf92	1	[hsa-miR-3192;hsa-miR-548q]
C17orf104	7	[hsa-miR-130a-5p;hsa-miR-181b-5p;hsa-miR-570-3p][hsa-miR-152;hsa-miR-9-5p][hsa-miR-181b-5p;hsa-miR-183-3p;hsa-miR-570-3p][hsa-miR-181b-5p;hsa-miR-3188;hsa-miR-570-3p][hsa-miR-181b-5p;hsa-miR-520f][hsa-miR-199b-3p;hsa-miR-543;hsa-miR-9-5p][hsa-miR-199b-3p;hsa-miR-9-5p]
C17orf107	5	[hsa-miR-136-3p;hsa-miR-24-2-5p;hsa-miR-3925-5p][hsa-miR-138-1-3p;hsa-miR-24-2-5p][hsa-miR-138-1-3p;hsa-miR-24-2-5p;hsa-miR-369-5p][hsa-miR-24-2-5p;hsa-miR-3925-5p][hsa-miR-24-2-5p;hsa-miR-605]
C17orf110	1	[hsa-miR-449a;hsa-miR-505-5p]
C17orf39	4	[hsa-miR-129-5p;hsa-miR-548d-3p;hsa-miR-590-3p][hsa-miR-129-5p;hsa-miR-590-3p][hsa-miR-1323;hsa-miR-96-5p][hsa-miR-17-5p;hsa-miR-21-5p;hsa-miR-9-3p]
C17orf49	4	[hsa-miR-214-3p;hsa-miR-24-3p;hsa-miR-493-3p][hsa-miR-214-3p;hsa-miR-493-3p][hsa-miR-24-3p;hsa-miR-3619-5p;hsa-miR-493-3p][hsa-miR-24-3p;hsa-miR-493-3p]
C17orf53	1	[hsa-miR-205-3p;hsa-miR-589-3p]
C17orf58	4	[hsa-miR-22-3p;hsa-miR-379-5p;hsa-miR-455-3p][hsa-miR-22-3p;hsa-miR-425-5p;hsa-miR-455-3p][hsa-miR-22-3p;hsa-miR-455-3p;hsa-miR-506-3p][hsa-miR-22-3p;hsa-miR-455-3p;hsa-miR-508-5p]
C17orf59	6	[hsa-miR-101-3p;hsa-miR-15b-5p;hsa-miR-16-5p][hsa-miR-15b-5p;hsa-miR-16-5p;hsa-miR-194-5p][hsa-miR-15b-5p;hsa-miR-16-5p;hsa-miR-424-5p][hsa-miR-15b-5p;hsa-miR-16-5p;hsa-miR-497-5p][hsa-miR-15b-5p;hsa-miR-27b-5p;hsa-miR-616-5p][hsa-miR-15b-5p;hsa-miR-616-5p]
C17orf65	2	[hsa-miR-3667-5p;hsa-miR-449a][hsa-miR-449a;hsa-miR-449b-5p]
C17orf77	2	[hsa-miR-136-5p;hsa-miR-185-5p;hsa-miR-374b-3p][hsa-miR-3202;hsa-miR-338-5p]
C17orf81	7	[hsa-miR-1269a;hsa-miR-450b-3p][hsa-miR-130b-5p;hsa-miR-30a-3p;hsa-miR-450b-3p][hsa-miR-133b;hsa-miR-450b-3p][hsa-miR-149-5p;hsa-miR-4284][hsa-miR-2114-5p;hsa-miR-30a-3p;hsa-miR-450b-3p][hsa-miR-30a-3p;hsa-miR-30d-3p;hsa-miR-450b-3p][hsa-miR-30a-3p;hsa-miR-450b-3p;hsa-miR-452-3p]
C17orf85	7	[hsa-miR-129-5p;hsa-miR-186-5p][hsa-miR-16-5p;hsa-miR-374c-5p;hsa-miR-497-5p][hsa-miR-3692-3p;hsa-miR-374c-5p;hsa-miR-497-5p][hsa-miR-374c-5p;hsa-miR-483-3p][hsa-miR-374c-5p;hsa-miR-497-5p][hsa-miR-374c-5p;hsa-miR-497-5p;hsa-miR-767-3p][hsa-miR-374c-5p;hsa-miR-642a-5p]
C17orf96	5	[hsa-miR-22-3p;hsa-miR-2355-3p;hsa-miR-27a-3p][hsa-miR-22-3p;hsa-miR-27a-3p;hsa-miR-29a-5p][hsa-miR-22-3p;hsa-miR-27a-3p;hsa-miR-451a][hsa-miR-27a-3p;hsa-miR-324-3p;hsa-miR-451a][hsa-miR-27a-3p;hsa-miR-451a]
C18orf1	6	[hsa-miR-101-3p;hsa-miR-363-3p;hsa-miR-499a-3p][hsa-miR-130b-3p;hsa-miR-363-3p;hsa-miR-499a-3p][hsa-miR-190b;hsa-miR-374b-5p;hsa-miR-376c][hsa-miR-190b;hsa-miR-376c][hsa-miR-29b-2-5p;hsa-miR-552][hsa-miR-363-3p;hsa-miR-499a-3p]
C18orf25	5	[hsa-miR-101-5p;hsa-miR-215][hsa-miR-148a-3p;hsa-miR-222-3p;hsa-miR-365a-3p][hsa-miR-148a-3p;hsa-miR-32-5p;hsa-miR-365a-3p][hsa-miR-205-3p;hsa-miR-221-3p;hsa-miR-519b-3p][hsa-miR-221-3p;hsa-miR-519b-3p]
C18orf26	2	[hsa-miR-206;hsa-miR-219-1-3p;hsa-miR-573][hsa-miR-219-1-3p;hsa-miR-573]
C18orf32	6	[hsa-miR-222-3p;hsa-miR-361-5p][hsa-miR-222-3p;hsa-miR-374a-3p;hsa-miR-577][hsa-miR-222-3p;hsa-miR-410][hsa-miR-361-5p;hsa-miR-374a-3p;hsa-miR-577][hsa-miR-374a-3p;hsa-miR-410;hsa-miR-577][hsa-miR-374a-3p;hsa-miR-577]
C18orf34	5	[hsa-miR-101-3p;hsa-miR-3125][hsa-miR-101-3p;hsa-miR-3164][hsa-miR-106b-5p;hsa-miR-15b-3p;hsa-miR-219-1-3p][hsa-miR-106b-5p;hsa-miR-195-5p][hsa-miR-106b-5p;hsa-miR-511]
C18orf42	6	[hsa-miR-320a;hsa-miR-330-3p;hsa-miR-340-5p][hsa-miR-320b;hsa-miR-320d;hsa-miR-330-3p][hsa-miR-320c;hsa-miR-320d;hsa-miR-330-3p][hsa-miR-320d;hsa-miR-330-3p][hsa-miR-330-3p;hsa-miR-340-5p][hsa-miR-330-3p;hsa-miR-340-5p;hsa-miR-607]
C18orf54	5	[hsa-miR-135a-5p;hsa-miR-135b-5p][hsa-miR-135a-5p;hsa-miR-223-3p;hsa-miR-500a-5p][hsa-miR-223-3p;hsa-miR-664-3p][hsa-miR-500a-5p;hsa-miR-500b;hsa-miR-664-3p][hsa-miR-500a-5p;hsa-miR-664-3p]
C18orf56	7	[hsa-miR-214-3p;hsa-miR-221-3p][hsa-miR-214-3p;hsa-miR-221-3p;hsa-miR-378b][hsa-miR-214-3p;hsa-miR-222-3p;hsa-miR-23b-3p][hsa-miR-214-3p;hsa-miR-23b-3p][hsa-miR-214-3p;hsa-miR-23b-3p;hsa-miR-23c][hsa-miR-214-3p;hsa-miR-23b-3p;hsa-miR-3690][hsa-miR-221-3p;hsa-miR-378b]
C18orf62	7	[hsa-miR-1224-5p;hsa-miR-382-5p][hsa-miR-29a-3p;hsa-miR-29c-3p][hsa-miR-29a-3p;hsa-miR-3130-3p;hsa-miR-338-5p][hsa-miR-29a-3p;hsa-miR-338-5p][hsa-miR-29a-3p;hsa-miR-338-5p;hsa-miR-382-5p][hsa-miR-29a-3p;hsa-miR-744-3p][hsa-miR-449b-3p;hsa-miR-514a-3p]
C18orf8	7	[hsa-let-7g-3p;hsa-miR-106b-5p][hsa-let-7g-3p;hsa-miR-3139][hsa-miR-106b-5p;hsa-miR-155-5p][hsa-miR-130b-3p;hsa-miR-493-5p][hsa-miR-155-5p;hsa-miR-301a-3p;hsa-miR-493-5p][hsa-miR-27b-5p;hsa-miR-301a-3p;hsa-miR-493-5p][hsa-miR-301a-3p;hsa-miR-493-5p]
C19orf12	1	[hsa-miR-150-5p;hsa-miR-2355-5p]
C19orf26	1	[hsa-miR-1251;hsa-miR-193a-3p]
C19orf38	1	[hsa-miR-125b-5p;hsa-miR-361-3p]
C19orf43	4	[hsa-miR-1248;hsa-miR-1266][hsa-miR-1266;hsa-miR-15a-3p;hsa-miR-520e][hsa-miR-1266;hsa-miR-17-5p][hsa-miR-1266;hsa-miR-516a-5p;hsa-miR-520e]
C19orf44	6	[hsa-miR-185-5p;hsa-miR-3150b-3p;hsa-miR-3916][hsa-miR-185-5p;hsa-miR-3174;hsa-miR-3916][hsa-miR-185-5p;hsa-miR-3916][hsa-miR-3150b-3p;hsa-miR-3173-3p][hsa-miR-3150b-3p;hsa-miR-3202][hsa-miR-3916;hsa-miR-3928]
C19orf47	7	[hsa-miR-143-3p;hsa-miR-184;hsa-miR-224-5p][hsa-miR-143-3p;hsa-miR-224-5p][hsa-miR-143-3p;hsa-miR-224-5p;hsa-miR-3609][hsa-miR-143-3p;hsa-miR-224-5p;hsa-miR-4306][hsa-miR-184;hsa-miR-224-5p][hsa-miR-184;hsa-miR-224-5p;hsa-miR-4306][hsa-miR-224-5p;hsa-miR-4306]
C19orf52	2	[hsa-miR-19a-3p;hsa-miR-19b-3p][hsa-miR-19b-3p;hsa-miR-483-5p]
C19orf57	1	[hsa-miR-135b-3p;hsa-miR-450b-5p]
C19orf6	5	[hsa-miR-107;hsa-miR-381][hsa-miR-15a-5p;hsa-miR-33b-5p;hsa-miR-381][hsa-miR-15a-5p;hsa-miR-381][hsa-miR-15b-5p;hsa-miR-506-3p][hsa-miR-16-5p;hsa-miR-195-5p]
C19orf66	8	[hsa-miR-125a-3p;hsa-miR-1269a][hsa-miR-1269a;hsa-miR-95][hsa-miR-1291;hsa-miR-138-5p;hsa-miR-1976][hsa-miR-1291;hsa-miR-146b-3p;hsa-miR-1976][hsa-miR-1291;hsa-miR-1825;hsa-miR-1976][hsa-miR-1291;hsa-miR-1976][hsa-miR-1291;hsa-miR-1976;hsa-miR-484][hsa-miR-1291;hsa-miR-1976;hsa-miR-654-5p]
C19orf73	5	[hsa-let-7g-3p;hsa-miR-101-3p;hsa-miR-199b-5p][hsa-let-7g-3p;hsa-miR-144-3p;hsa-miR-199b-5p][hsa-let-7g-3p;hsa-miR-199b-5p][hsa-let-7g-3p;hsa-miR-199b-5p;hsa-miR-486-5p][hsa-let-7g-3p;hsa-miR-199b-5p;hsa-miR-504]
C1D	2	[hsa-miR-224-3p;hsa-miR-664-3p][hsa-miR-579;hsa-miR-664-3p]
C1GALT1	6	[hsa-let-7f-5p;hsa-let-7i-5p][hsa-let-7f-5p;hsa-miR-140-3p;hsa-miR-491-3p][hsa-let-7f-5p;hsa-miR-29b-1-5p][hsa-let-7f-5p;hsa-miR-29b-1-5p;hsa-miR-4326][hsa-let-7f-5p;hsa-miR-29b-1-5p;hsa-miR-489][hsa-let-7f-5p;hsa-miR-335-3p]
C1orf101	4	[hsa-miR-1269a;hsa-miR-24-1-5p;hsa-miR-25-3p][hsa-miR-1269a;hsa-miR-25-3p][hsa-miR-1269a;hsa-miR-92b-3p][hsa-miR-25-3p;hsa-miR-92b-3p]
C1orf105	1	[hsa-miR-3150b-3p;hsa-miR-326]
C1orf110	3	[hsa-miR-214-3p;hsa-miR-338-3p][hsa-miR-214-3p;hsa-miR-338-3p;hsa-miR-3619-5p][hsa-miR-214-3p;hsa-miR-3619-5p]
C1orf114	1	[hsa-miR-22-3p;hsa-miR-7-1-3p]
C1orf122	5	[hsa-miR-1262;hsa-miR-224-3p;hsa-miR-3157-5p][hsa-miR-1262;hsa-miR-3157-5p][hsa-miR-1262;hsa-miR-3157-5p;hsa-miR-93-3p][hsa-miR-30c-2-3p;hsa-miR-361-3p;hsa-miR-93-3p][hsa-miR-361-3p;hsa-miR-573]
C1orf127	1	[hsa-miR-605;hsa-miR-92a-3p]
C1orf130	4	[hsa-miR-15b-3p;hsa-miR-22-3p][hsa-miR-15b-3p;hsa-miR-22-3p;hsa-miR-452-3p][hsa-miR-22-3p;hsa-miR-3611;hsa-miR-452-3p][hsa-miR-22-3p;hsa-miR-452-3p]
C1orf131	2	[hsa-miR-105-5p;hsa-miR-3065-3p][hsa-miR-105-5p;hsa-miR-3065-3p;hsa-miR-433]
C1orf135	4	[hsa-miR-155-3p;hsa-miR-18a-3p][hsa-miR-155-3p;hsa-miR-18a-3p;hsa-miR-3685][hsa-miR-155-3p;hsa-miR-3685][hsa-miR-18a-3p;hsa-miR-3685]
C1orf144	7	[hsa-miR-105-5p;hsa-miR-148a-3p;hsa-miR-3170][hsa-miR-137;hsa-miR-223-5p;hsa-miR-4284][hsa-miR-137;hsa-miR-4284][hsa-miR-148a-3p;hsa-miR-152;hsa-miR-3170][hsa-miR-148a-3p;hsa-miR-28-5p;hsa-miR-3170][hsa-miR-148a-3p;hsa-miR-3170][hsa-miR-148a-3p;hsa-miR-34c-5p]
C1orf150	3	[hsa-miR-206;hsa-miR-20a-3p][hsa-miR-206;hsa-miR-20a-3p;hsa-miR-33a-5p][hsa-miR-20a-3p;hsa-miR-33a-5p]
C1orf158	2	[hsa-miR-191-3p;hsa-miR-3200-5p;hsa-miR-766-3p][hsa-miR-3200-5p;hsa-miR-766-3p]
C1orf168	2	[hsa-miR-143-5p;hsa-miR-24-3p;hsa-miR-452-5p][hsa-miR-24-3p;hsa-miR-452-5p]
C1orf172	3	[hsa-miR-203;hsa-miR-3157-5p;hsa-miR-505-5p][hsa-miR-203;hsa-miR-505-5p;hsa-miR-873-5p][hsa-miR-203;hsa-miR-873-5p]
C1orf173	6	[hsa-miR-101-3p;hsa-miR-27a-3p][hsa-miR-101-3p;hsa-miR-27a-3p;hsa-miR-374a-3p][hsa-miR-101-3p;hsa-miR-27a-3p;hsa-miR-590-3p][hsa-miR-153;hsa-miR-20b-5p;hsa-miR-9-5p][hsa-miR-153;hsa-miR-9-5p][hsa-miR-27a-3p;hsa-miR-664-3p]
C1orf177	1	[hsa-miR-219-1-3p;hsa-miR-224-3p]
C1orf185	5	[hsa-miR-1255a;hsa-miR-204-5p][hsa-miR-1255a;hsa-miR-204-5p;hsa-miR-519a-5p][hsa-miR-1255a;hsa-miR-519a-5p][hsa-miR-1255a;hsa-miR-607][hsa-miR-518f-5p;hsa-miR-548b-3p]
C1orf186	3	[hsa-miR-214-5p;hsa-miR-3928;hsa-miR-942][hsa-miR-214-5p;hsa-miR-942][hsa-miR-93-3p;hsa-miR-942]
C1orf198	5	[hsa-miR-135a-5p;hsa-miR-135b-5p][hsa-miR-135a-5p;hsa-miR-135b-5p;hsa-miR-545-5p][hsa-miR-135b-5p;hsa-miR-224-3p][hsa-miR-135b-5p;hsa-miR-3688-3p;hsa-miR-522-3p][hsa-miR-135b-5p;hsa-miR-522-3p]
C1orf204	1	[hsa-miR-3116;hsa-miR-589-5p]
C1orf21	8	[hsa-miR-15a-5p;hsa-miR-20a-3p;hsa-miR-452-5p][hsa-miR-195-3p;hsa-miR-590-3p][hsa-miR-20a-3p;hsa-miR-3065-5p;hsa-miR-452-5p][hsa-miR-20a-3p;hsa-miR-3609;hsa-miR-452-5p][hsa-miR-20a-3p;hsa-miR-452-5p][hsa-miR-20a-3p;hsa-miR-452-5p;hsa-miR-508-3p][hsa-miR-452-5p;hsa-miR-708-3p][hsa-miR-452-5p;hsa-miR-708-3p;hsa-miR-939]
C1orf210	1	[hsa-miR-125b-5p;hsa-miR-940]
C1orf212	2	[hsa-miR-29a-3p;hsa-miR-29b-3p;hsa-miR-29c-3p][hsa-miR-29b-3p;hsa-miR-29c-3p]
C1orf216	2	[hsa-miR-24-1-5p;hsa-miR-24-2-5p;hsa-miR-363-5p][hsa-miR-24-2-5p;hsa-miR-363-5p]
C1orf226	1	[hsa-miR-618;hsa-miR-7-5p]
C1orf27	2	[hsa-miR-2115-3p;hsa-miR-518c-5p][hsa-miR-2115-3p;hsa-miR-518c-5p;hsa-miR-589-3p]
C1orf43	3	[hsa-miR-204-5p;hsa-miR-29b-1-5p;hsa-miR-518c-3p][hsa-miR-204-5p;hsa-miR-518c-3p][hsa-miR-204-5p;hsa-miR-518c-3p;hsa-miR-518f-3p]
C1orf51	1	[hsa-miR-34a-3p;hsa-miR-383]
C1orf52	7	[hsa-miR-125b-2-3p;hsa-miR-1267;hsa-miR-505-3p][hsa-miR-1267;hsa-miR-505-3p][hsa-miR-217;hsa-miR-542-3p][hsa-miR-330-3p;hsa-miR-542-3p][hsa-miR-330-3p;hsa-miR-542-3p;hsa-miR-548b-3p][hsa-miR-505-3p;hsa-miR-542-3p][hsa-miR-542-3p;hsa-miR-548b-3p]
C1orf54	1	[hsa-miR-126-5p;hsa-miR-141-5p]
C1orf56	6	[hsa-miR-106a-5p;hsa-miR-17-5p;hsa-miR-9-5p][hsa-miR-106b-5p;hsa-miR-17-5p;hsa-miR-9-5p][hsa-miR-17-5p;hsa-miR-20b-5p;hsa-miR-656][hsa-miR-17-5p;hsa-miR-20b-5p;hsa-miR-9-5p][hsa-miR-17-5p;hsa-miR-9-5p;hsa-miR-93-5p][hsa-miR-629-5p;hsa-miR-9-5p]
C1orf63	7	[hsa-miR-106a-5p;hsa-miR-143-5p;hsa-miR-20b-5p][hsa-miR-106b-5p;hsa-miR-16-2-3p;hsa-miR-20a-5p][hsa-miR-142-5p;hsa-miR-16-2-3p][hsa-miR-143-5p;hsa-miR-20b-5p][hsa-miR-143-5p;hsa-miR-20b-5p;hsa-miR-9-5p][hsa-miR-16-2-3p;hsa-miR-20a-5p][hsa-miR-16-2-3p;hsa-miR-20a-5p;hsa-miR-93-5p]
C1orf86	4	[hsa-miR-1276;hsa-miR-3127-5p][hsa-miR-135b-5p;hsa-miR-3150b-3p][hsa-miR-135b-5p;hsa-miR-3150b-3p;hsa-miR-514a-3p][hsa-miR-135b-5p;hsa-miR-3150b-3p;hsa-miR-660-5p]
C1orf87	1	[hsa-miR-26b-3p;hsa-miR-494]
C1orf94	5	[hsa-miR-138-2-3p;hsa-miR-3150b-3p][hsa-miR-138-2-3p;hsa-miR-487a;hsa-miR-584-5p][hsa-miR-138-2-3p;hsa-miR-584-5p][hsa-miR-18b-5p;hsa-miR-576-5p;hsa-miR-584-5p][hsa-miR-487a;hsa-miR-584-5p]
C1orf95	4	[hsa-miR-1;hsa-miR-33a-3p][hsa-miR-1;hsa-miR-33a-3p;hsa-miR-410][hsa-miR-1;hsa-miR-539-5p;hsa-miR-592][hsa-miR-1;hsa-miR-592]
C1QBP	3	[hsa-let-7b-3p;hsa-miR-135b-5p;hsa-miR-381][hsa-let-7b-3p;hsa-miR-361-3p;hsa-miR-381][hsa-miR-135b-5p;hsa-miR-381]
C1QL1	7	[hsa-let-7g-3p;hsa-miR-133a;hsa-miR-212-3p][hsa-let-7g-3p;hsa-miR-133a;hsa-miR-9-5p][hsa-let-7g-3p;hsa-miR-212-3p][hsa-let-7g-3p;hsa-miR-212-3p;hsa-miR-9-5p][hsa-let-7g-3p;hsa-miR-9-5p][hsa-miR-132-3p;hsa-miR-212-3p;hsa-miR-9-5p][hsa-miR-33a-3p;hsa-miR-9-5p]
C1QL2	4	[hsa-miR-125b-2-3p;hsa-miR-155-5p;hsa-miR-32-3p][hsa-miR-125b-2-3p;hsa-miR-155-5p;hsa-miR-548d-3p][hsa-miR-155-5p;hsa-miR-32-3p][hsa-miR-155-5p;hsa-miR-32-3p;hsa-miR-548d-3p]
C1QL3	5	[hsa-miR-15b-3p;hsa-miR-874][hsa-miR-324-5p;hsa-miR-3681-5p][hsa-miR-324-5p;hsa-miR-3681-5p;hsa-miR-424-5p][hsa-miR-324-5p;hsa-miR-3681-5p;hsa-miR-758][hsa-miR-324-5p;hsa-miR-3681-5p;hsa-miR-874]
C1QL4	6	[hsa-let-7a-2-3p;hsa-let-7e-5p;hsa-miR-486-3p][hsa-let-7a-2-3p;hsa-miR-15b-5p;hsa-miR-486-3p][hsa-let-7a-2-3p;hsa-miR-361-5p;hsa-miR-486-3p][hsa-let-7a-2-3p;hsa-miR-424-5p;hsa-miR-486-3p][hsa-let-7a-2-3p;hsa-miR-486-3p][hsa-let-7a-2-3p;hsa-miR-486-3p;hsa-miR-624-5p]
C1QTNF6	4	[hsa-miR-29b-3p;hsa-miR-29c-3p;hsa-miR-93-3p][hsa-miR-29c-3p;hsa-miR-339-3p;hsa-miR-93-3p][hsa-miR-29c-3p;hsa-miR-93-3p][hsa-miR-339-3p;hsa-miR-767-5p]
C1QTNF7	4	[hsa-miR-128;hsa-miR-16-2-3p;hsa-miR-545-5p][hsa-miR-16-2-3p;hsa-miR-195-3p][hsa-miR-16-2-3p;hsa-miR-195-3p;hsa-miR-33a-5p][hsa-miR-16-2-3p;hsa-miR-511]
C1QTNF9	2	[hsa-miR-19a-5p;hsa-miR-19b-1-5p][hsa-miR-19b-1-5p;hsa-miR-19b-2-5p]
C1QTNF9B-AS1	8	[hsa-miR-185-5p;hsa-miR-196a-3p][hsa-miR-185-5p;hsa-miR-214-3p;hsa-miR-335-5p][hsa-miR-18a-5p;hsa-miR-335-5p][hsa-miR-196a-3p;hsa-miR-214-3p;hsa-miR-335-5p][hsa-miR-214-3p;hsa-miR-2355-5p;hsa-miR-335-5p][hsa-miR-214-3p;hsa-miR-3158-3p;hsa-miR-335-5p][hsa-miR-214-3p;hsa-miR-335-5p][hsa-miR-214-3p;hsa-miR-335-5p;hsa-miR-4306]
C1R	1	[hsa-miR-518c-5p;hsa-miR-590-3p]
C1S	4	[hsa-miR-130a-3p;hsa-miR-187-3p][hsa-miR-130a-3p;hsa-miR-301a-3p][hsa-miR-130a-3p;hsa-miR-301a-3p;hsa-miR-301b][hsa-miR-301a-3p;hsa-miR-301b]
C2	2	[hsa-miR-10a-3p;hsa-miR-2110;hsa-miR-582-3p][hsa-miR-2110;hsa-miR-582-3p]
C20orf11	4	[hsa-miR-124-3p;hsa-miR-29b-3p;hsa-miR-506-3p][hsa-miR-133a;hsa-miR-29b-3p;hsa-miR-29c-3p][hsa-miR-133b;hsa-miR-29b-3p;hsa-miR-29c-3p][hsa-miR-29b-3p;hsa-miR-29c-3p]
C20orf111	7	[hsa-miR-1229;hsa-miR-363-3p][hsa-miR-149-5p;hsa-miR-186-5p;hsa-miR-32-5p][hsa-miR-149-5p;hsa-miR-299-5p;hsa-miR-363-3p][hsa-miR-149-5p;hsa-miR-32-5p][hsa-miR-149-5p;hsa-miR-32-5p;hsa-miR-561-3p][hsa-miR-149-5p;hsa-miR-488-3p][hsa-miR-299-5p;hsa-miR-363-3p]
C20orf112	7	[hsa-miR-130b-3p;hsa-miR-148a-3p][hsa-miR-130b-3p;hsa-miR-148a-3p;hsa-miR-15a-5p][hsa-miR-148a-3p;hsa-miR-493-5p;hsa-miR-543][hsa-miR-148a-3p;hsa-miR-543][hsa-miR-184;hsa-miR-206;hsa-miR-944][hsa-miR-184;hsa-miR-377-3p;hsa-miR-944][hsa-miR-184;hsa-miR-944]
C20orf118	1	[hsa-miR-1281;hsa-miR-21-3p]
C20orf160	6	[hsa-miR-139-5p;hsa-miR-196b-5p][hsa-miR-139-5p;hsa-miR-22-3p][hsa-miR-139-5p;hsa-miR-22-3p;hsa-miR-548v][hsa-miR-139-5p;hsa-miR-548v][hsa-miR-196b-5p;hsa-miR-22-3p][hsa-miR-22-3p;hsa-miR-3605-5p]
C20orf194	5	[hsa-let-7c;hsa-let-7f-5p;hsa-miR-103a-2-5p][hsa-let-7c;hsa-miR-101-3p][hsa-let-7c;hsa-miR-103a-2-5p][hsa-let-7c;hsa-miR-1248;hsa-miR-25-3p][hsa-miR-1248;hsa-miR-25-3p]
C20orf20	7	[hsa-miR-1283;hsa-miR-320c][hsa-miR-1283;hsa-miR-628-3p][hsa-miR-1283;hsa-miR-9-3p][hsa-miR-144-3p;hsa-miR-548f;hsa-miR-548x-3p][hsa-miR-548f;hsa-miR-548x-3p][hsa-miR-548f;hsa-miR-548x-3p;hsa-miR-628-3p][hsa-miR-548f;hsa-miR-548x-3p;hsa-miR-9-3p]
C20orf202	2	[hsa-miR-128;hsa-miR-18a-3p][hsa-miR-128;hsa-miR-30a-3p]
C20orf24	6	[hsa-miR-105-5p;hsa-miR-26b-5p][hsa-miR-141-3p;hsa-miR-3614-5p][hsa-miR-185-3p;hsa-miR-200a-3p;hsa-miR-3614-5p][hsa-miR-185-3p;hsa-miR-3614-5p][hsa-miR-200a-3p;hsa-miR-3614-5p][hsa-miR-203;hsa-miR-3614-5p]
C20orf26	2	[hsa-miR-1227;hsa-miR-1296;hsa-miR-24-2-5p][hsa-miR-1227;hsa-miR-877-3p]
C20orf27	5	[hsa-miR-1304-5p;hsa-miR-486-3p;hsa-miR-660-5p][hsa-miR-182-3p;hsa-miR-3160-3p;hsa-miR-342-5p][hsa-miR-182-3p;hsa-miR-3160-3p;hsa-miR-449c-5p][hsa-miR-182-3p;hsa-miR-3160-3p;hsa-miR-660-5p][hsa-miR-486-3p;hsa-miR-660-5p]
C20orf72	1	[hsa-miR-18a-5p;hsa-miR-664-5p]
C20orf85	1	[hsa-miR-29c-5p;hsa-miR-3065-3p]
C21orf62	2	[hsa-miR-141-3p;hsa-miR-184;hsa-miR-605][hsa-miR-141-3p;hsa-miR-223-3p;hsa-miR-605]
C21orf7	1	[hsa-miR-3654;hsa-miR-7-1-3p;hsa-miR-767-3p]
C21orf91	7	[hsa-miR-142-5p;hsa-miR-182-5p][hsa-miR-182-5p;hsa-miR-576-5p][hsa-miR-190b;hsa-miR-320a][hsa-miR-190b;hsa-miR-320a;hsa-miR-576-5p][hsa-miR-190b;hsa-miR-320a;hsa-miR-92a-3p][hsa-miR-190b;hsa-miR-425-5p;hsa-miR-92a-3p][hsa-miR-190b;hsa-miR-92a-3p]
C22orf23	4	[hsa-miR-146a-3p;hsa-miR-31-3p][hsa-miR-146a-3p;hsa-miR-31-3p;hsa-miR-548s][hsa-miR-31-3p;hsa-miR-548s;hsa-miR-570-3p][hsa-miR-31-3p;hsa-miR-570-3p]
C22orf24	2	[hsa-miR-18a-5p;hsa-miR-214-3p;hsa-miR-221-5p][hsa-miR-18a-5p;hsa-miR-221-5p]
C22orf26	1	[hsa-miR-22-3p;hsa-miR-3607-3p]
C22orf31	1	[hsa-miR-30d-3p;hsa-miR-30e-3p]
C22orf32	3	[hsa-miR-520f;hsa-miR-629-3p;hsa-miR-93-3p][hsa-miR-520f;hsa-miR-93-3p][hsa-miR-629-3p;hsa-miR-93-3p]
C2CD2	4	[hsa-miR-135a-5p;hsa-miR-17-5p][hsa-miR-135a-5p;hsa-miR-17-5p;hsa-miR-20a-5p][hsa-miR-135a-5p;hsa-miR-20a-5p][hsa-miR-204-5p;hsa-miR-519d;hsa-miR-520a-3p]
C2CD2L	6	[hsa-miR-10a-3p;hsa-miR-138-5p][hsa-miR-10a-3p;hsa-miR-138-5p;hsa-miR-526b-5p][hsa-miR-138-5p;hsa-miR-335-5p][hsa-miR-196a-3p;hsa-miR-34b-5p][hsa-miR-196a-3p;hsa-miR-449c-5p;hsa-miR-505-3p][hsa-miR-3622b-3p;hsa-miR-449c-5p;hsa-miR-505-3p]
C2CD3	3	[hsa-miR-1270;hsa-miR-654-5p;hsa-miR-767-3p][hsa-miR-1301;hsa-miR-1306-3p;hsa-miR-222-3p][hsa-miR-1301;hsa-miR-185-3p]
C2CD4A	2	[hsa-miR-3168;hsa-miR-3688-3p][hsa-miR-3613-5p;hsa-miR-3662;hsa-miR-3688-3p]
C2CD4C	6	[hsa-miR-137;hsa-miR-363-3p;hsa-miR-7-1-3p][hsa-miR-20a-3p;hsa-miR-340-5p;hsa-miR-363-3p][hsa-miR-20a-3p;hsa-miR-363-3p;hsa-miR-7-1-3p][hsa-miR-340-5p;hsa-miR-363-3p][hsa-miR-340-5p;hsa-miR-363-3p;hsa-miR-7-1-3p][hsa-miR-363-3p;hsa-miR-495;hsa-miR-7-1-3p]
C2orf29	2	[hsa-miR-449b-5p;hsa-miR-449c-5p][hsa-miR-449b-5p;hsa-miR-577]
C2orf40	1	[hsa-let-7a-2-3p;hsa-miR-377-3p]
C2orf42	6	[hsa-miR-15b-5p;hsa-miR-19b-3p;hsa-miR-545-3p][hsa-miR-15b-5p;hsa-miR-545-3p][hsa-miR-19a-3p;hsa-miR-19b-3p][hsa-miR-19a-3p;hsa-miR-424-5p;hsa-miR-497-5p][hsa-miR-19a-3p;hsa-miR-497-5p][hsa-miR-19b-3p;hsa-miR-545-3p]
C2orf43	1	[hsa-miR-449b-5p;hsa-miR-576-5p]
C2orf44	3	[hsa-miR-130a-3p;hsa-miR-130b-3p;hsa-miR-301b][hsa-miR-130b-3p;hsa-miR-301b][hsa-miR-146a-3p;hsa-miR-301b;hsa-miR-320e]
C2orf47	6	[hsa-miR-105-5p;hsa-miR-27a-3p;hsa-miR-3140-3p][hsa-miR-105-5p;hsa-miR-3140-3p][hsa-miR-105-5p;hsa-miR-3140-3p;hsa-miR-513a-5p][hsa-miR-105-5p;hsa-miR-3140-3p;hsa-miR-548t-5p][hsa-miR-105-5p;hsa-miR-3148;hsa-miR-548t-5p][hsa-miR-105-5p;hsa-miR-513a-5p;hsa-miR-548t-5p]
C2orf49	3	[hsa-miR-3653;hsa-miR-518c-5p][hsa-miR-3653;hsa-miR-548x-3p][hsa-miR-518c-5p;hsa-miR-548x-3p]
C2orf53	3	[hsa-miR-1254;hsa-miR-129-1-3p;hsa-miR-3127-5p][hsa-miR-1254;hsa-miR-3937][hsa-miR-129-1-3p;hsa-miR-129-2-3p]
C2orf55	7	[hsa-miR-143-5p;hsa-miR-33a-5p][hsa-miR-143-5p;hsa-miR-33a-5p;hsa-miR-34a-5p][hsa-miR-143-5p;hsa-miR-33a-5p;hsa-miR-449b-5p][hsa-miR-19b-1-5p;hsa-miR-22-3p;hsa-miR-767-3p][hsa-miR-19b-1-5p;hsa-miR-767-3p][hsa-miR-33b-5p;hsa-miR-34a-5p][hsa-miR-33b-5p;hsa-miR-34a-5p;hsa-miR-3682-3p]
C2orf57	1	[hsa-miR-518c-5p;hsa-miR-545-5p]
C2orf63	5	[hsa-miR-3189-3p;hsa-miR-577][hsa-miR-338-3p;hsa-miR-34c-3p][hsa-miR-338-3p;hsa-miR-34c-3p;hsa-miR-374a-3p][hsa-miR-338-3p;hsa-miR-34c-3p;hsa-miR-548t-5p][hsa-miR-338-3p;hsa-miR-374a-3p]
C2orf65	1	[hsa-miR-320e;hsa-miR-500b]
C2orf68	1	[hsa-miR-3910;hsa-miR-3914;hsa-miR-520a-5p]
C2orf69	7	[hsa-let-7f-2-3p;hsa-miR-32-5p;hsa-miR-374c-5p][hsa-let-7f-2-3p;hsa-miR-374c-5p][hsa-miR-103a-2-5p;hsa-miR-181a-5p;hsa-miR-181b-5p][hsa-miR-103a-2-5p;hsa-miR-181b-5p][hsa-miR-181a-5p;hsa-miR-374c-5p;hsa-miR-616-5p][hsa-miR-211-5p;hsa-miR-374c-5p;hsa-miR-616-5p][hsa-miR-374c-5p;hsa-miR-616-5p]
C2orf71	1	[hsa-miR-19a-3p;hsa-miR-19b-3p]
C2orf72	3	[hsa-miR-15a-5p;hsa-miR-424-5p][hsa-miR-15b-5p;hsa-miR-424-5p][hsa-miR-16-5p;hsa-miR-424-5p]
C2orf83	1	[hsa-miR-3614-5p;hsa-miR-578]
C2orf88	7	[hsa-miR-135b-5p;hsa-miR-30e-3p;hsa-miR-488-5p][hsa-miR-135b-5p;hsa-miR-934][hsa-miR-150-5p;hsa-miR-30a-3p;hsa-miR-934][hsa-miR-218-5p;hsa-miR-30e-3p][hsa-miR-29c-3p;hsa-miR-30e-3p;hsa-miR-488-5p][hsa-miR-30a-3p;hsa-miR-934][hsa-miR-30e-3p;hsa-miR-488-5p]
C3orf15	2	[hsa-miR-29a-3p;hsa-miR-30c-2-3p][hsa-miR-30c-2-3p;hsa-miR-767-5p]
C3orf17	3	[hsa-miR-3202;hsa-miR-34b-3p][hsa-miR-3202;hsa-miR-34b-3p;hsa-miR-589-5p][hsa-miR-34b-3p;hsa-miR-589-5p]
C3orf18	4	[hsa-miR-155-5p;hsa-miR-30b-5p][hsa-miR-155-5p;hsa-miR-30b-5p;hsa-miR-335-3p][hsa-miR-155-5p;hsa-miR-30c-5p;hsa-miR-335-3p][hsa-miR-155-5p;hsa-miR-30d-5p]
C3orf23	3	[hsa-miR-16-5p;hsa-miR-200b-3p][hsa-miR-16-5p;hsa-miR-200b-3p;hsa-miR-369-3p][hsa-miR-2116-5p;hsa-miR-943]
C3orf24	7	[hsa-miR-101-5p;hsa-miR-335-3p][hsa-miR-101-5p;hsa-miR-335-3p;hsa-miR-624-5p][hsa-miR-101-5p;hsa-miR-511][hsa-miR-101-5p;hsa-miR-511;hsa-miR-93-3p][hsa-miR-129-5p;hsa-miR-3149;hsa-miR-335-3p][hsa-miR-17-3p;hsa-miR-3149;hsa-miR-335-3p][hsa-miR-3149;hsa-miR-335-3p]
C3orf27	2	[hsa-miR-15b-5p;hsa-miR-16-5p;hsa-miR-22-3p][hsa-miR-16-5p;hsa-miR-382-5p;hsa-miR-424-5p]
C3orf35	1	[hsa-miR-23a-5p;hsa-miR-23b-5p]
C3orf38	7	[hsa-let-7a-5p;hsa-miR-29b-2-5p][hsa-miR-188-3p;hsa-miR-33b-5p][hsa-miR-188-3p;hsa-miR-33b-5p;hsa-miR-3609][hsa-miR-20b-5p;hsa-miR-29b-2-5p][hsa-miR-20b-5p;hsa-miR-29b-2-5p;hsa-miR-3609][hsa-miR-29b-2-5p;hsa-miR-576-5p][hsa-miR-33a-5p;hsa-miR-3910]
C3orf43	1	[hsa-miR-577;hsa-miR-581]
C3orf55	7	[hsa-miR-106a-5p;hsa-miR-224-5p;hsa-miR-452-3p][hsa-miR-106a-5p;hsa-miR-452-3p][hsa-miR-106a-5p;hsa-miR-520a-3p][hsa-miR-1304-5p;hsa-miR-577;hsa-miR-942][hsa-miR-20b-5p;hsa-miR-577;hsa-miR-942][hsa-miR-224-5p;hsa-miR-577;hsa-miR-942][hsa-miR-577;hsa-miR-942]
C3orf58	5	[hsa-miR-16-2-3p;hsa-miR-7-1-3p][hsa-miR-301b;hsa-miR-505-5p;hsa-miR-582-5p][hsa-miR-3126-5p;hsa-miR-512-3p][hsa-miR-340-5p;hsa-miR-505-5p;hsa-miR-641][hsa-miR-505-5p;hsa-miR-641]
C3orf67	7	[hsa-miR-10b-5p;hsa-miR-200c-3p;hsa-miR-618][hsa-miR-141-3p;hsa-miR-200c-3p;hsa-miR-618][hsa-miR-200a-3p;hsa-miR-499a-3p][hsa-miR-200c-3p;hsa-miR-618][hsa-miR-3143;hsa-miR-618][hsa-miR-493-5p;hsa-miR-499a-3p][hsa-miR-499a-3p;hsa-miR-655]
C3orf70	5	[hsa-miR-18a-5p;hsa-miR-19a-3p;hsa-miR-505-3p][hsa-miR-19a-3p;hsa-miR-206;hsa-miR-505-3p][hsa-miR-19a-3p;hsa-miR-20a-5p;hsa-miR-505-3p][hsa-miR-19a-3p;hsa-miR-34b-5p;hsa-miR-505-3p][hsa-miR-19a-3p;hsa-miR-505-3p;hsa-miR-570-3p]
C4orf19	6	[hsa-miR-125a-5p;hsa-miR-125b-5p;hsa-miR-186-3p][hsa-miR-125a-5p;hsa-miR-125b-5p;hsa-miR-27b-5p][hsa-miR-125a-5p;hsa-miR-186-3p][hsa-miR-125a-5p;hsa-miR-186-3p;hsa-miR-31-3p][hsa-miR-27b-5p;hsa-miR-296-3p][hsa-miR-27b-5p;hsa-miR-296-3p;hsa-miR-504]
C4orf3	1	[hsa-miR-1270;hsa-miR-548b-3p]
C4orf32	4	[hsa-miR-29a-3p;hsa-miR-29c-3p;hsa-miR-548d-3p][hsa-miR-29a-3p;hsa-miR-3163;hsa-miR-548d-3p][hsa-miR-29b-3p;hsa-miR-29c-3p;hsa-miR-548d-3p][hsa-miR-29c-3p;hsa-miR-548d-3p]
C4orf34	6	[hsa-miR-135a-5p;hsa-miR-135b-5p;hsa-miR-576-5p][hsa-miR-135a-5p;hsa-miR-590-5p][hsa-miR-135b-5p;hsa-miR-193b-5p;hsa-miR-576-5p][hsa-miR-135b-5p;hsa-miR-570-3p;hsa-miR-576-5p][hsa-miR-135b-5p;hsa-miR-576-5p][hsa-miR-3168;hsa-miR-519a-5p]
C4orf46	2	[hsa-miR-124-3p;hsa-miR-576-5p][hsa-miR-506-3p;hsa-miR-576-5p]
C4orf6	2	[hsa-miR-192-3p;hsa-miR-30b-3p][hsa-miR-192-3p;hsa-miR-30b-3p;hsa-miR-3192]
C5	3	[hsa-miR-200c-3p;hsa-miR-33a-3p;hsa-miR-449b-5p][hsa-miR-200c-3p;hsa-miR-449b-5p][hsa-miR-200c-3p;hsa-miR-449b-5p;hsa-miR-449c-5p]
C5AR1	1	[hsa-miR-1224-3p;hsa-miR-21-3p]
C5orf15	6	[hsa-let-7b-3p;hsa-miR-23b-3p][hsa-let-7b-3p;hsa-miR-758][hsa-miR-128;hsa-miR-224-5p][hsa-miR-128;hsa-miR-224-5p;hsa-miR-29a-3p][hsa-miR-154-3p;hsa-miR-577][hsa-miR-29a-3p;hsa-miR-577]
C5orf20	5	[hsa-miR-10a-5p;hsa-miR-146a-5p][hsa-miR-10a-5p;hsa-miR-146a-5p;hsa-miR-224-3p][hsa-miR-10a-5p;hsa-miR-146a-5p;hsa-miR-664-3p][hsa-miR-146a-5p;hsa-miR-522-3p][hsa-miR-146a-5p;hsa-miR-664-3p]
C5orf24	7	[hsa-miR-1304-5p;hsa-miR-19a-3p;hsa-miR-221-3p][hsa-miR-1304-5p;hsa-miR-221-3p][hsa-miR-1304-5p;hsa-miR-221-3p;hsa-miR-30d-3p][hsa-miR-148a-5p;hsa-miR-148b-3p;hsa-miR-429][hsa-miR-148a-5p;hsa-miR-429][hsa-miR-153;hsa-miR-221-3p][hsa-miR-215;hsa-miR-502-3p]
C5orf25	7	[hsa-miR-185-5p;hsa-miR-548d-3p;hsa-miR-577][hsa-miR-185-5p;hsa-miR-577][hsa-miR-3144-3p;hsa-miR-3200-3p][hsa-miR-3200-3p;hsa-miR-3692-3p][hsa-miR-3200-3p;hsa-miR-4306][hsa-miR-3200-3p;hsa-miR-4306;hsa-miR-577][hsa-miR-3200-3p;hsa-miR-4306;hsa-miR-643]
C5orf30	7	[hsa-miR-1245a;hsa-miR-18a-5p][hsa-miR-1305;hsa-miR-18a-5p][hsa-miR-1305;hsa-miR-18a-5p;hsa-miR-7-1-3p][hsa-miR-1305;hsa-miR-18a-5p;hsa-miR-96-5p][hsa-miR-18a-5p;hsa-miR-30a-3p][hsa-miR-30b-5p;hsa-miR-30e-3p][hsa-miR-30b-5p;hsa-miR-30e-3p;hsa-miR-374b-3p]
C5orf34	2	[hsa-miR-223-3p;hsa-miR-338-5p][hsa-miR-223-3p;hsa-miR-338-5p;hsa-miR-520h]
C5orf42	1	[hsa-miR-296-3p;hsa-miR-3922-3p]
C5orf43	5	[hsa-miR-186-5p;hsa-miR-217][hsa-miR-186-5p;hsa-miR-34c-5p][hsa-miR-217;hsa-miR-34c-5p;hsa-miR-449a][hsa-miR-34c-5p;hsa-miR-3617;hsa-miR-449a][hsa-miR-34c-5p;hsa-miR-449a]
C5orf44	6	[hsa-miR-143-5p;hsa-miR-33a-5p][hsa-miR-185-5p;hsa-miR-33a-5p][hsa-miR-185-5p;hsa-miR-33a-5p;hsa-miR-33b-5p][hsa-miR-18a-5p;hsa-miR-18b-5p;hsa-miR-33b-5p][hsa-miR-18a-5p;hsa-miR-18b-5p;hsa-miR-570-3p][hsa-miR-18a-5p;hsa-miR-33b-5p]
C5orf46	1	[hsa-miR-3654;hsa-miR-505-5p]
C5orf47	6	[hsa-miR-144-3p;hsa-miR-154-5p][hsa-miR-154-5p;hsa-miR-340-5p][hsa-miR-340-5p;hsa-miR-3913-5p][hsa-miR-340-5p;hsa-miR-576-5p][hsa-miR-340-5p;hsa-miR-664-3p;hsa-miR-9-5p][hsa-miR-340-5p;hsa-miR-9-5p]
C5orf51	5	[hsa-let-7b-5p;hsa-let-7d-5p][hsa-let-7b-5p;hsa-let-7d-5p;hsa-let-7e-5p][hsa-let-7b-5p;hsa-let-7d-5p;hsa-miR-206][hsa-let-7c;hsa-let-7d-5p][hsa-let-7d-5p;hsa-let-7e-5p;hsa-miR-3927]
C5orf54	2	[hsa-miR-149-5p;hsa-miR-23a-3p][hsa-miR-149-5p;hsa-miR-23c]
C5orf58	1	[hsa-miR-150-5p;hsa-miR-381]
C5orf62	7	[hsa-let-7c;hsa-let-7e-5p;hsa-let-7g-5p][hsa-let-7c;hsa-let-7f-5p][hsa-let-7c;hsa-let-7f-5p;hsa-let-7g-5p][hsa-let-7c;hsa-let-7f-5p;hsa-let-7i-5p][hsa-let-7c;hsa-let-7f-5p;hsa-miR-98][hsa-let-7c;hsa-let-7g-5p][hsa-let-7g-5p;hsa-let-7i-5p]
C5orf63	7	[hsa-miR-23c;hsa-miR-505-3p;hsa-miR-7-1-3p][hsa-miR-23c;hsa-miR-505-3p;hsa-miR-96-5p][hsa-miR-337-3p;hsa-miR-505-3p;hsa-miR-7-1-3p][hsa-miR-337-3p;hsa-miR-505-3p;hsa-miR-96-5p][hsa-miR-450b-5p;hsa-miR-505-3p;hsa-miR-96-5p][hsa-miR-497-5p;hsa-miR-505-3p;hsa-miR-7-1-3p][hsa-miR-505-3p;hsa-miR-96-5p]
C5orf64	8	[hsa-miR-128;hsa-miR-181a-2-3p][hsa-miR-128;hsa-miR-181a-2-3p;hsa-miR-670][hsa-miR-130b-5p;hsa-miR-181a-2-3p;hsa-miR-664-3p][hsa-miR-181a-2-3p;hsa-miR-3065-5p;hsa-miR-664-3p][hsa-miR-181a-2-3p;hsa-miR-3662;hsa-miR-664-3p][hsa-miR-181a-2-3p;hsa-miR-627;hsa-miR-664-3p][hsa-miR-181a-2-3p;hsa-miR-664-3p][hsa-miR-181a-2-3p;hsa-miR-670]
C6orf1	4	[hsa-miR-1284;hsa-miR-449b-3p;hsa-miR-450b-5p][hsa-miR-1284;hsa-miR-450b-5p][hsa-miR-449b-3p;hsa-miR-450b-5p][hsa-miR-450b-5p;hsa-miR-548l]
C6orf106	5	[hsa-miR-1271-5p;hsa-miR-377-3p][hsa-miR-215;hsa-miR-628-5p][hsa-miR-3914;hsa-miR-548d-3p;hsa-miR-628-5p][hsa-miR-548b-3p;hsa-miR-628-5p][hsa-miR-548d-3p;hsa-miR-628-5p]
C6orf108	4	[hsa-miR-1228-3p;hsa-miR-1254;hsa-miR-188-3p][hsa-miR-1228-3p;hsa-miR-188-3p][hsa-miR-1228-3p;hsa-miR-188-3p;hsa-miR-3614-5p][hsa-miR-3614-5p;hsa-miR-490-3p]
C6orf118	5	[hsa-miR-181a-2-3p;hsa-miR-193a-3p;hsa-miR-193b-3p][hsa-miR-181a-2-3p;hsa-miR-193b-3p][hsa-miR-181a-2-3p;hsa-miR-193b-3p;hsa-miR-3187-3p][hsa-miR-181a-2-3p;hsa-miR-193b-3p;hsa-miR-503][hsa-miR-193a-3p;hsa-miR-193b-3p]
C6orf120	4	[hsa-miR-1248;hsa-miR-99b-3p][hsa-miR-15b-3p;hsa-miR-3154;hsa-miR-943][hsa-miR-190b;hsa-miR-449b-5p;hsa-miR-99b-3p][hsa-miR-190b;hsa-miR-99b-3p]
C6orf136	4	[hsa-miR-126-5p;hsa-miR-183-3p][hsa-miR-15b-5p;hsa-miR-183-3p][hsa-miR-32-5p;hsa-miR-374c-5p][hsa-miR-32-5p;hsa-miR-92a-3p]
C6orf15	5	[hsa-miR-150-5p;hsa-miR-372][hsa-miR-150-5p;hsa-miR-372;hsa-miR-491-5p][hsa-miR-150-5p;hsa-miR-491-5p][hsa-miR-372;hsa-miR-491-5p][hsa-miR-372;hsa-miR-491-5p;hsa-miR-520a-3p]
C6orf165	2	[hsa-miR-1305;hsa-miR-421;hsa-miR-455-5p][hsa-miR-421;hsa-miR-455-5p]
C6orf170	1	[hsa-miR-3074-3p;hsa-miR-32-3p]
C6orf195	7	[hsa-miR-193a-3p;hsa-miR-519a-5p;hsa-miR-539-5p][hsa-miR-193b-3p;hsa-miR-24-3p][hsa-miR-193b-3p;hsa-miR-24-3p;hsa-miR-519a-5p][hsa-miR-193b-3p;hsa-miR-24-3p;hsa-miR-552][hsa-miR-193b-3p;hsa-miR-519a-5p;hsa-miR-539-5p][hsa-miR-24-3p;hsa-miR-338-3p][hsa-miR-519a-5p;hsa-miR-539-5p]
C6orf201	4	[hsa-miR-145-5p;hsa-miR-22-3p][hsa-miR-145-5p;hsa-miR-22-3p;hsa-miR-299-3p][hsa-miR-22-3p;hsa-miR-873-5p][hsa-miR-26a-2-3p;hsa-miR-873-5p]
C6orf211	7	[hsa-let-7c;hsa-miR-128;hsa-miR-605][hsa-let-7c;hsa-miR-202-3p][hsa-let-7c;hsa-miR-605][hsa-let-7e-5p;hsa-miR-27a-3p][hsa-let-7e-5p;hsa-miR-27a-3p;hsa-miR-27b-3p][hsa-let-7g-5p;hsa-miR-27a-3p][hsa-let-7i-5p;hsa-miR-27a-3p;hsa-miR-27b-3p]
C6orf225	3	[hsa-miR-1227;hsa-miR-18a-5p;hsa-miR-335-3p][hsa-miR-18a-5p;hsa-miR-335-3p][hsa-miR-18a-5p;hsa-miR-335-3p;hsa-miR-3611]
C6orf228	8	[hsa-miR-1226-3p;hsa-miR-15a-5p;hsa-miR-182-5p][hsa-miR-135b-5p;hsa-miR-182-5p][hsa-miR-135b-5p;hsa-miR-182-5p;hsa-miR-29b-2-5p][hsa-miR-135b-5p;hsa-miR-497-3p][hsa-miR-15a-5p;hsa-miR-182-5p][hsa-miR-15a-5p;hsa-miR-182-5p;hsa-miR-29b-2-5p][hsa-miR-15a-5p;hsa-miR-182-5p;hsa-miR-767-5p][hsa-miR-182-5p;hsa-miR-195-5p]
C6orf25	5	[hsa-miR-3155a;hsa-miR-516b-5p;hsa-miR-760][hsa-miR-484;hsa-miR-516b-5p][hsa-miR-484;hsa-miR-516b-5p;hsa-miR-518c-5p][hsa-miR-484;hsa-miR-516b-5p;hsa-miR-760][hsa-miR-516b-5p;hsa-miR-760]
C6orf47	4	[hsa-miR-138-5p;hsa-miR-24-3p;hsa-miR-542-3p][hsa-miR-2278;hsa-miR-542-3p][hsa-miR-24-3p;hsa-miR-542-3p][hsa-miR-24-3p;hsa-miR-542-3p;hsa-miR-628-5p]
C6orf62	7	[hsa-miR-1301;hsa-miR-152;hsa-miR-607][hsa-miR-1301;hsa-miR-335-3p;hsa-miR-607][hsa-miR-1301;hsa-miR-544a;hsa-miR-607][hsa-miR-1301;hsa-miR-607][hsa-miR-151a-5p;hsa-miR-3662][hsa-miR-17-5p;hsa-miR-23a-3p][hsa-miR-3658;hsa-miR-3662]
C6orf72	1	[hsa-miR-26a-5p;hsa-miR-26b-5p]
C7orf23	7	[hsa-miR-153;hsa-miR-340-5p;hsa-miR-511][hsa-miR-340-5p;hsa-miR-3655][hsa-miR-340-5p;hsa-miR-376c;hsa-miR-511][hsa-miR-340-5p;hsa-miR-511][hsa-miR-340-5p;hsa-miR-511;hsa-miR-550a-3p][hsa-miR-491-5p;hsa-miR-511][hsa-miR-505-3p;hsa-miR-550a-3p]
C7orf25	4	[hsa-miR-129-1-3p;hsa-miR-9-5p][hsa-miR-519e-5p;hsa-miR-766-3p][hsa-miR-625-3p;hsa-miR-9-5p][hsa-miR-629-3p;hsa-miR-9-5p]
C7orf26	1	[hsa-miR-3690;hsa-miR-548e]
C7orf31	5	[hsa-miR-10a-3p;hsa-miR-148b-5p;hsa-miR-3168][hsa-miR-148b-5p;hsa-miR-3168][hsa-miR-148b-5p;hsa-miR-3168;hsa-miR-590-3p][hsa-miR-148b-5p;hsa-miR-590-3p][hsa-miR-3168;hsa-miR-576-5p]
C7orf41	4	[hsa-miR-135a-5p;hsa-miR-676-3p][hsa-miR-135b-5p;hsa-miR-432-3p;hsa-miR-676-3p][hsa-miR-135b-5p;hsa-miR-676-3p][hsa-miR-181c-5p;hsa-miR-30e-3p]
C7orf43	6	[hsa-miR-17-5p;hsa-miR-214-3p;hsa-miR-30a-5p][hsa-miR-17-5p;hsa-miR-30b-5p;hsa-miR-93-5p][hsa-miR-17-5p;hsa-miR-30d-5p;hsa-miR-93-5p][hsa-miR-17-5p;hsa-miR-93-5p][hsa-miR-214-3p;hsa-miR-30a-5p][hsa-miR-30e-5p;hsa-miR-93-5p]
C7orf45	2	[hsa-miR-130b-5p;hsa-miR-452-3p][hsa-miR-452-3p;hsa-miR-514b-5p;hsa-miR-579]
C7orf49	1	[hsa-miR-218-1-3p;hsa-miR-34a-5p]
C7orf57	1	[hsa-miR-3161;hsa-miR-765]
C7orf60	6	[hsa-miR-182-5p;hsa-miR-29a-3p;hsa-miR-29c-3p][hsa-miR-182-5p;hsa-miR-29c-3p;hsa-miR-639][hsa-miR-2115-5p;hsa-miR-29c-3p;hsa-miR-520a-3p][hsa-miR-29c-3p;hsa-miR-520a-3p][hsa-miR-3065-5p;hsa-miR-31-3p][hsa-miR-3065-5p;hsa-miR-31-3p;hsa-miR-513b]
C7orf63	1	[hsa-miR-432-3p;hsa-miR-607]
C7orf71	5	[hsa-miR-1262;hsa-miR-150-3p][hsa-miR-1262;hsa-miR-150-3p;hsa-miR-22-5p][hsa-miR-148a-3p;hsa-miR-150-3p;hsa-miR-22-5p][hsa-miR-150-3p;hsa-miR-22-5p][hsa-miR-150-3p;hsa-miR-22-5p;hsa-miR-532-5p]
C7orf73	5	[hsa-miR-29a-3p;hsa-miR-29b-3p;hsa-miR-335-5p][hsa-miR-29a-3p;hsa-miR-335-5p][hsa-miR-29a-3p;hsa-miR-767-5p][hsa-miR-29b-3p;hsa-miR-29c-3p][hsa-miR-29c-3p;hsa-miR-335-5p]
C8A	2	[hsa-miR-148a-3p;hsa-miR-152;hsa-miR-212-3p][hsa-miR-148a-3p;hsa-miR-212-3p]
C8orf22	1	[hsa-miR-501-3p;hsa-miR-502-3p]
C8orf34	4	[hsa-miR-142-5p;hsa-miR-195-3p;hsa-miR-548o-3p][hsa-miR-142-5p;hsa-miR-548o-3p][hsa-miR-15b-3p;hsa-miR-195-3p;hsa-miR-548o-3p][hsa-miR-195-3p;hsa-miR-548o-3p]
C8orf37	1	[hsa-miR-3126-5p;hsa-miR-449a]
C8orf4	8	[hsa-miR-101-3p;hsa-miR-130b-3p;hsa-miR-625-3p][hsa-miR-130b-3p;hsa-miR-222-5p][hsa-miR-130b-3p;hsa-miR-222-5p;hsa-miR-424-5p][hsa-miR-130b-3p;hsa-miR-301b][hsa-miR-130b-3p;hsa-miR-301b;hsa-miR-338-5p][hsa-miR-130b-3p;hsa-miR-301b;hsa-miR-340-5p][hsa-miR-130b-3p;hsa-miR-625-3p][hsa-miR-195-5p;hsa-miR-30a-5p]
C8orf40	4	[hsa-miR-28-5p;hsa-miR-320a;hsa-miR-320c][hsa-miR-28-5p;hsa-miR-320a;hsa-miR-708-5p][hsa-miR-28-5p;hsa-miR-320b;hsa-miR-708-5p][hsa-miR-28-5p;hsa-miR-708-5p]
C8orf42	2	[hsa-miR-1269a;hsa-miR-3910;hsa-miR-506-3p][hsa-miR-1269a;hsa-miR-506-3p]
C8orf44	1	[hsa-miR-1255a;hsa-miR-508-5p]
C8orf46	7	[hsa-miR-129-5p;hsa-miR-135b-5p;hsa-miR-548s][hsa-miR-129-5p;hsa-miR-188-3p;hsa-miR-548s][hsa-miR-129-5p;hsa-miR-548s][hsa-miR-129-5p;hsa-miR-548s;hsa-miR-7-5p][hsa-miR-135a-5p;hsa-miR-548s][hsa-miR-188-3p;hsa-miR-22-3p][hsa-miR-548s;hsa-miR-7-5p]
C8orf47	1	[hsa-miR-218-1-3p;hsa-miR-9-5p]
C8orf58	6	[hsa-let-7f-5p;hsa-miR-103a-2-5p][hsa-let-7g-5p;hsa-miR-103a-2-5p;hsa-miR-98][hsa-let-7g-5p;hsa-miR-98][hsa-let-7i-5p;hsa-miR-103a-2-5p][hsa-miR-103a-2-5p;hsa-miR-1915-3p;hsa-miR-98][hsa-miR-103a-2-5p;hsa-miR-98]
C8orf59	7	[hsa-miR-106a-5p;hsa-miR-17-5p;hsa-miR-30d-3p][hsa-miR-1227;hsa-miR-1252;hsa-miR-30a-3p][hsa-miR-1252;hsa-miR-30a-3p][hsa-miR-17-5p;hsa-miR-30d-3p][hsa-miR-302b-3p;hsa-miR-30d-3p][hsa-miR-30a-3p;hsa-miR-493-5p;hsa-miR-543][hsa-miR-30d-3p;hsa-miR-374b-3p]
C8orf86	1	[hsa-miR-342-3p;hsa-miR-497-3p]
C9	2	[hsa-miR-1256;hsa-miR-26a-1-3p;hsa-miR-590-3p][hsa-miR-26a-1-3p;hsa-miR-590-3p]
C9orf100	7	[hsa-miR-15b-5p;hsa-miR-195-5p][hsa-miR-15b-5p;hsa-miR-195-5p;hsa-miR-3117-3p][hsa-miR-15b-5p;hsa-miR-195-5p;hsa-miR-362-3p][hsa-miR-15b-5p;hsa-miR-195-5p;hsa-miR-424-5p][hsa-miR-3065-3p;hsa-miR-329][hsa-miR-3065-3p;hsa-miR-329;hsa-miR-424-5p][hsa-miR-329;hsa-miR-424-5p]
C9orf114	5	[hsa-miR-1227;hsa-miR-18a-5p;hsa-miR-449b-5p][hsa-miR-15a-3p;hsa-miR-18a-5p][hsa-miR-15a-3p;hsa-miR-18a-5p;hsa-miR-449a][hsa-miR-15a-3p;hsa-miR-18a-5p;hsa-miR-548q][hsa-miR-18a-5p;hsa-miR-449a;hsa-miR-449b-5p]
C9orf116	2	[hsa-miR-342-5p;hsa-miR-363-5p][hsa-miR-363-5p;hsa-miR-582-3p]
C9orf129	4	[hsa-miR-3613-5p;hsa-miR-382-5p;hsa-miR-532-5p][hsa-miR-3613-5p;hsa-miR-382-5p;hsa-miR-9-5p][hsa-miR-3613-5p;hsa-miR-532-5p;hsa-miR-9-5p][hsa-miR-3613-5p;hsa-miR-9-5p]
C9orf152	3	[hsa-miR-129-2-3p;hsa-miR-3617][hsa-miR-129-2-3p;hsa-miR-641;hsa-miR-940][hsa-miR-3617;hsa-miR-940]
C9orf170	7	[hsa-miR-1;hsa-miR-3682-3p][hsa-miR-1;hsa-miR-3682-3p;hsa-miR-539-5p][hsa-miR-1;hsa-miR-3682-3p;hsa-miR-93-3p][hsa-miR-206;hsa-miR-324-3p;hsa-miR-539-5p][hsa-miR-206;hsa-miR-539-5p][hsa-miR-206;hsa-miR-539-5p;hsa-miR-93-3p][hsa-miR-3682-3p;hsa-miR-93-3p]
C9orf171	1	[hsa-miR-1237;hsa-miR-765]
C9orf24	7	[hsa-miR-1271-5p;hsa-miR-216a;hsa-miR-3616-5p][hsa-miR-1271-5p;hsa-miR-326;hsa-miR-3616-5p][hsa-miR-1271-5p;hsa-miR-3616-5p][hsa-miR-216a;hsa-miR-3616-5p;hsa-miR-581][hsa-miR-3170;hsa-miR-3616-5p;hsa-miR-592][hsa-miR-3616-5p;hsa-miR-592][hsa-miR-3616-5p;hsa-miR-599]
C9orf3	4	[hsa-miR-16-5p;hsa-miR-195-5p][hsa-miR-3653;hsa-miR-503][hsa-miR-374b-3p;hsa-miR-424-5p;hsa-miR-503][hsa-miR-497-5p;hsa-miR-503]
C9orf40	6	[hsa-miR-106b-5p;hsa-miR-26b-5p][hsa-miR-129-5p;hsa-miR-26a-5p][hsa-miR-129-5p;hsa-miR-26b-5p;hsa-miR-362-5p][hsa-miR-129-5p;hsa-miR-362-5p][hsa-miR-1297;hsa-miR-375][hsa-miR-26a-5p;hsa-miR-934]
C9orf41	8	[hsa-miR-135b-3p;hsa-miR-183-5p][hsa-miR-135b-3p;hsa-miR-183-5p;hsa-miR-641][hsa-miR-135b-3p;hsa-miR-3616-3p;hsa-miR-641][hsa-miR-135b-3p;hsa-miR-576-5p][hsa-miR-135b-3p;hsa-miR-576-5p;hsa-miR-767-5p][hsa-miR-135b-3p;hsa-miR-641][hsa-miR-187-3p;hsa-miR-581][hsa-miR-187-3p;hsa-miR-581;hsa-miR-592]
C9orf47	1	[hsa-miR-218-5p;hsa-miR-221-5p]
C9orf69	4	[hsa-miR-155-5p;hsa-miR-195-5p;hsa-miR-29c-3p][hsa-miR-155-5p;hsa-miR-29c-3p][hsa-miR-155-5p;hsa-miR-29c-3p;hsa-miR-454-3p][hsa-miR-190b;hsa-miR-195-5p;hsa-miR-454-3p]
C9orf72	7	[hsa-miR-142-3p;hsa-miR-1976;hsa-miR-942][hsa-miR-142-3p;hsa-miR-30b-5p;hsa-miR-942][hsa-miR-142-3p;hsa-miR-942][hsa-miR-20b-3p;hsa-miR-30a-5p;hsa-miR-30d-5p][hsa-miR-20b-3p;hsa-miR-30d-5p][hsa-miR-30a-5p;hsa-miR-30c-1-3p;hsa-miR-30d-5p][hsa-miR-30d-5p;hsa-miR-942]
C9orf9	2	[hsa-miR-3136-5p;hsa-miR-379-5p;hsa-miR-526b-5p][hsa-miR-3136-5p;hsa-miR-943]
C9orf91	1	[hsa-miR-1252;hsa-miR-378b]
CA10	8	[hsa-miR-3065-3p;hsa-miR-760][hsa-miR-30a-5p;hsa-miR-34a-5p][hsa-miR-30a-5p;hsa-miR-34a-5p;hsa-miR-653][hsa-miR-30a-5p;hsa-miR-653][hsa-miR-3158-3p;hsa-miR-760][hsa-miR-373-3p;hsa-miR-760][hsa-miR-548l;hsa-miR-760][hsa-miR-578;hsa-miR-760]
CA11	2	[hsa-miR-204-5p;hsa-miR-222-5p;hsa-miR-4326][hsa-miR-204-5p;hsa-miR-4326]
CA12	2	[hsa-miR-18a-5p;hsa-miR-374a-5p;hsa-miR-374b-5p][hsa-miR-18a-5p;hsa-miR-374b-5p]
CA13	2	[hsa-miR-2113;hsa-miR-337-3p;hsa-miR-765][hsa-miR-337-3p;hsa-miR-765]
CA2	8	[hsa-miR-1270;hsa-miR-129-5p;hsa-miR-590-3p][hsa-miR-129-5p;hsa-miR-144-3p;hsa-miR-374b-5p][hsa-miR-129-5p;hsa-miR-200b-3p;hsa-miR-374b-5p][hsa-miR-129-5p;hsa-miR-23a-3p;hsa-miR-590-3p][hsa-miR-129-5p;hsa-miR-374b-5p][hsa-miR-129-5p;hsa-miR-590-3p][hsa-miR-129-5p;hsa-miR-590-3p;hsa-miR-618][hsa-miR-144-3p;hsa-miR-944]
CA3	2	[hsa-miR-328;hsa-miR-378a-5p][hsa-miR-378a-5p;hsa-miR-518a-5p;hsa-miR-527]
CA6	1	[hsa-miR-181a-2-3p;hsa-miR-505-3p]
CA7	5	[hsa-miR-193a-5p;hsa-miR-4306;hsa-miR-449c-5p][hsa-miR-193a-5p;hsa-miR-449b-5p;hsa-miR-449c-5p][hsa-miR-193a-5p;hsa-miR-449c-5p][hsa-miR-193a-5p;hsa-miR-449c-5p;hsa-miR-493-3p][hsa-miR-214-3p;hsa-miR-3918]
CA8	8	[hsa-miR-181d;hsa-miR-18a-5p;hsa-miR-205-3p][hsa-miR-181d;hsa-miR-205-3p][hsa-miR-181d;hsa-miR-205-3p;hsa-miR-497-3p][hsa-miR-18b-5p;hsa-miR-205-3p;hsa-miR-496][hsa-miR-18b-5p;hsa-miR-3174;hsa-miR-496][hsa-miR-18b-5p;hsa-miR-496][hsa-miR-205-3p;hsa-miR-511][hsa-miR-496;hsa-miR-497-3p]
CA9	4	[hsa-miR-130a-5p;hsa-miR-23a-3p;hsa-miR-449b-5p][hsa-miR-23a-3p;hsa-miR-23b-3p][hsa-miR-23a-3p;hsa-miR-23b-3p;hsa-miR-449b-5p][hsa-miR-23a-3p;hsa-miR-449b-5p]
CAAP1	7	[hsa-let-7a-3p;hsa-let-7f-1-3p][hsa-let-7a-3p;hsa-let-7f-1-3p;hsa-miR-378a-5p][hsa-let-7a-3p;hsa-let-7f-1-3p;hsa-miR-539-5p][hsa-let-7b-3p;hsa-miR-378a-5p][hsa-let-7b-3p;hsa-miR-539-5p][hsa-let-7f-1-3p;hsa-miR-1284][hsa-let-7f-1-3p;hsa-miR-32-3p]
CAB39	4	[hsa-let-7a-3p;hsa-miR-363-3p;hsa-miR-495][hsa-let-7b-3p;hsa-miR-106a-5p][hsa-miR-15b-5p;hsa-miR-3161][hsa-miR-2355-5p;hsa-miR-30a-3p]
CAB39L	2	[hsa-miR-126-5p;hsa-miR-542-3p][hsa-miR-15b-3p;hsa-miR-3140-3p]
CABLES1	3	[hsa-miR-1271-5p;hsa-miR-362-3p][hsa-miR-1271-5p;hsa-miR-362-3p;hsa-miR-376c][hsa-miR-218-5p;hsa-miR-362-3p;hsa-miR-376c]
CABP1	5	[hsa-miR-145-5p;hsa-miR-564;hsa-miR-874][hsa-miR-27a-3p;hsa-miR-328;hsa-miR-874][hsa-miR-27a-5p;hsa-miR-328;hsa-miR-874][hsa-miR-27a-5p;hsa-miR-564;hsa-miR-874][hsa-miR-328;hsa-miR-874]
CABP4	1	[hsa-miR-342-5p;hsa-miR-3934]
CABP7	5	[hsa-miR-152;hsa-miR-16-1-3p;hsa-miR-20a-3p][hsa-miR-16-1-3p;hsa-miR-20a-3p][hsa-miR-16-1-3p;hsa-miR-20a-3p;hsa-miR-30b-5p][hsa-miR-16-1-3p;hsa-miR-20a-3p;hsa-miR-320e][hsa-miR-16-1-3p;hsa-miR-22-3p]
CABS1	2	[hsa-miR-3653;hsa-miR-3667-5p][hsa-miR-3653;hsa-miR-499a-5p]
CABYR	5	[hsa-miR-18b-5p;hsa-miR-30d-3p;hsa-miR-577][hsa-miR-221-3p;hsa-miR-30d-3p;hsa-miR-514b-5p][hsa-miR-296-3p;hsa-miR-30a-3p][hsa-miR-30d-3p;hsa-miR-486-3p][hsa-miR-30d-3p;hsa-miR-514b-5p]
CACFD1	1	[hsa-miR-29a-3p;hsa-miR-29c-3p;hsa-miR-98]
CACHD1	8	[hsa-miR-136-5p;hsa-miR-34c-5p;hsa-miR-589-5p][hsa-miR-15b-3p;hsa-miR-584-5p;hsa-miR-589-5p][hsa-miR-15b-3p;hsa-miR-589-5p][hsa-miR-30e-5p;hsa-miR-488-3p;hsa-miR-589-5p][hsa-miR-34c-5p;hsa-miR-589-5p][hsa-miR-4284;hsa-miR-488-3p;hsa-miR-589-5p][hsa-miR-448;hsa-miR-488-3p;hsa-miR-589-5p][hsa-miR-488-3p;hsa-miR-589-5p]
CACNA1A	9	[hsa-miR-130a-3p;hsa-miR-130b-3p;hsa-miR-522-3p][hsa-miR-130a-3p;hsa-miR-296-3p;hsa-miR-522-3p][hsa-miR-130a-3p;hsa-miR-29c-3p;hsa-miR-522-3p][hsa-miR-130a-3p;hsa-miR-455-3p;hsa-miR-522-3p][hsa-miR-130a-3p;hsa-miR-522-3p][hsa-miR-27a-3p;hsa-miR-522-3p;hsa-miR-590-3p][hsa-miR-29b-3p;hsa-miR-522-3p][hsa-miR-3065-3p;hsa-miR-522-3p][hsa-miR-522-3p;hsa-miR-590-3p]
CACNA1B	6	[hsa-miR-1271-5p;hsa-miR-153][hsa-miR-129-1-3p;hsa-miR-1290;hsa-miR-548f][hsa-miR-129-1-3p;hsa-miR-1290;hsa-miR-548v][hsa-miR-129-1-3p;hsa-miR-199b-5p][hsa-miR-3680-3p;hsa-miR-548f][hsa-miR-495;hsa-miR-548f]
CACNA1C	8	[hsa-miR-100-3p;hsa-miR-155-5p;hsa-miR-9-3p][hsa-miR-153;hsa-miR-33a-5p][hsa-miR-153;hsa-miR-33a-5p;hsa-miR-363-3p][hsa-miR-155-5p;hsa-miR-32-5p][hsa-miR-155-5p;hsa-miR-363-3p;hsa-miR-9-3p][hsa-miR-155-5p;hsa-miR-582-5p][hsa-miR-155-5p;hsa-miR-9-3p][hsa-miR-33a-5p;hsa-miR-381]
CACNA1D	6	[hsa-let-7a-5p;hsa-miR-33a-5p][hsa-miR-150-5p;hsa-miR-205-3p;hsa-miR-338-5p][hsa-miR-150-5p;hsa-miR-338-5p][hsa-miR-190b;hsa-miR-373-5p][hsa-miR-301a-3p;hsa-miR-98][hsa-miR-30a-5p;hsa-miR-98]
CACNA1E	7	[hsa-let-7f-5p;hsa-miR-203;hsa-miR-9-5p][hsa-let-7g-5p;hsa-miR-2355-5p;hsa-miR-9-5p][hsa-miR-15b-5p;hsa-miR-424-5p][hsa-miR-203;hsa-miR-9-5p][hsa-miR-2355-5p;hsa-miR-3116;hsa-miR-9-5p][hsa-miR-2355-5p;hsa-miR-9-5p][hsa-miR-34c-5p;hsa-miR-9-5p]
CACNA1G	6	[hsa-miR-1271-5p;hsa-miR-32-5p][hsa-miR-139-3p;hsa-miR-32-5p][hsa-miR-139-3p;hsa-miR-32-5p;hsa-miR-652-3p][hsa-miR-153;hsa-miR-32-5p][hsa-miR-32-5p;hsa-miR-381][hsa-miR-32-5p;hsa-miR-425-3p]
CACNA1H	2	[hsa-miR-137;hsa-miR-363-3p][hsa-miR-32-5p;hsa-miR-363-3p;hsa-miR-92a-3p]
CACNA1I	6	[hsa-let-7e-5p;hsa-miR-363-3p][hsa-let-7e-5p;hsa-miR-363-3p;hsa-miR-497-3p][hsa-miR-29c-3p;hsa-miR-363-3p][hsa-miR-29c-3p;hsa-miR-363-3p;hsa-miR-497-3p][hsa-miR-363-3p;hsa-miR-3920;hsa-miR-497-3p][hsa-miR-363-3p;hsa-miR-497-3p]
CACNA2D1	5	[hsa-miR-1271-5p;hsa-miR-19b-1-5p][hsa-miR-1271-5p;hsa-miR-19b-1-5p;hsa-miR-342-3p][hsa-miR-18a-5p;hsa-miR-18b-5p;hsa-miR-3692-3p][hsa-miR-18a-5p;hsa-miR-199b-3p;hsa-miR-487a][hsa-miR-18a-5p;hsa-miR-3692-3p;hsa-miR-516b-5p]
CACNA2D2	7	[hsa-miR-124-3p;hsa-miR-181a-5p][hsa-miR-144-3p;hsa-miR-190b;hsa-miR-96-5p][hsa-miR-190b;hsa-miR-3121-3p;hsa-miR-96-5p][hsa-miR-190b;hsa-miR-96-5p][hsa-miR-221-3p;hsa-miR-338-3p][hsa-miR-221-3p;hsa-miR-338-3p;hsa-miR-582-3p][hsa-miR-221-3p;hsa-miR-935]
CACNA2D3	5	[hsa-miR-106a-5p;hsa-miR-582-5p][hsa-miR-140-5p;hsa-miR-17-5p][hsa-miR-140-5p;hsa-miR-17-5p;hsa-miR-29b-2-5p][hsa-miR-140-5p;hsa-miR-17-5p;hsa-miR-582-5p][hsa-miR-30a-3p;hsa-miR-34c-5p]
CACNB1	9	[hsa-miR-183-5p;hsa-miR-424-5p][hsa-miR-29b-2-5p;hsa-miR-320d;hsa-miR-424-5p][hsa-miR-31-5p;hsa-miR-320d;hsa-miR-424-5p][hsa-miR-320d;hsa-miR-330-3p;hsa-miR-424-5p][hsa-miR-320d;hsa-miR-3662;hsa-miR-424-5p][hsa-miR-320d;hsa-miR-424-5p][hsa-miR-320d;hsa-miR-424-5p;hsa-miR-9-3p][hsa-miR-424-5p;hsa-miR-544b;hsa-miR-9-3p][hsa-miR-424-5p;hsa-miR-9-3p]
CACNB2	8	[hsa-let-7a-5p;hsa-miR-214-5p][hsa-let-7a-5p;hsa-miR-214-5p;hsa-miR-582-5p][hsa-miR-1284;hsa-miR-214-5p;hsa-miR-582-5p][hsa-miR-148a-3p;hsa-miR-214-5p][hsa-miR-214-5p;hsa-miR-374a-5p;hsa-miR-376c][hsa-miR-214-5p;hsa-miR-376c][hsa-miR-214-5p;hsa-miR-376c;hsa-miR-497-5p][hsa-miR-214-5p;hsa-miR-376c;hsa-miR-582-5p]
CACNB3	7	[hsa-miR-135a-3p;hsa-miR-3065-5p][hsa-miR-135a-3p;hsa-miR-3065-5p;hsa-miR-629-3p][hsa-miR-135a-3p;hsa-miR-3065-5p;hsa-miR-765][hsa-miR-183-5p;hsa-miR-3150b-3p][hsa-miR-183-5p;hsa-miR-34a-5p][hsa-miR-18a-5p;hsa-miR-2114-3p][hsa-miR-3065-5p;hsa-miR-765]
CACNB4	6	[hsa-let-7a-3p;hsa-miR-28-3p;hsa-miR-33a-5p][hsa-let-7a-3p;hsa-miR-28-3p;hsa-miR-513b][hsa-miR-185-5p;hsa-miR-28-3p][hsa-miR-185-5p;hsa-miR-28-3p;hsa-miR-3150b-3p][hsa-miR-20b-5p;hsa-miR-28-3p;hsa-miR-532-5p][hsa-miR-28-3p;hsa-miR-9-3p]
CACNG2	2	[hsa-miR-129-5p;hsa-miR-130b-5p;hsa-miR-3140-3p][hsa-miR-130b-5p;hsa-miR-3140-3p]
CACNG3	5	[hsa-miR-125b-2-3p;hsa-miR-493-3p;hsa-miR-576-5p][hsa-miR-3681-5p;hsa-miR-486-3p;hsa-miR-489][hsa-miR-486-3p;hsa-miR-489][hsa-miR-486-3p;hsa-miR-493-3p;hsa-miR-576-5p][hsa-miR-489;hsa-miR-493-3p]
CACNG4	5	[hsa-let-7g-5p;hsa-miR-29c-3p;hsa-miR-3150b-3p][hsa-miR-29a-3p;hsa-miR-29b-3p][hsa-miR-29a-3p;hsa-miR-29c-3p][hsa-miR-29c-3p;hsa-miR-3150b-3p][hsa-miR-31-5p;hsa-miR-98]
CACNG6	1	[hsa-miR-1275;hsa-miR-493-3p]
CACUL1	9	[hsa-miR-106a-5p;hsa-miR-17-5p;hsa-miR-9-3p][hsa-miR-106a-5p;hsa-miR-26a-1-3p;hsa-miR-9-3p][hsa-miR-106a-5p;hsa-miR-519b-3p;hsa-miR-9-3p][hsa-miR-106a-5p;hsa-miR-9-3p][hsa-miR-15b-5p;hsa-miR-9-3p;hsa-miR-93-5p][hsa-miR-17-5p;hsa-miR-9-3p;hsa-miR-93-5p][hsa-miR-20b-5p;hsa-miR-9-3p;hsa-miR-93-5p][hsa-miR-520g;hsa-miR-9-3p][hsa-miR-9-3p;hsa-miR-93-5p]
CACYBP	3	[hsa-miR-16-1-3p;hsa-miR-3938][hsa-miR-16-1-3p;hsa-miR-4286][hsa-miR-16-1-3p;hsa-miR-4286;hsa-miR-605]
CAD	7	[hsa-miR-1913;hsa-miR-222-5p;hsa-miR-324-3p][hsa-miR-1915-5p;hsa-miR-324-3p;hsa-miR-3662][hsa-miR-1915-5p;hsa-miR-3662][hsa-miR-222-5p;hsa-miR-324-3p][hsa-miR-222-5p;hsa-miR-3662][hsa-miR-222-5p;hsa-miR-502-5p][hsa-miR-324-3p;hsa-miR-99a-5p]
CADM1	8	[hsa-let-7a-2-3p;hsa-miR-106a-3p;hsa-miR-130b-5p][hsa-let-7a-2-3p;hsa-miR-130b-5p][hsa-miR-1283;hsa-miR-1305;hsa-miR-130b-5p][hsa-miR-1305;hsa-miR-130b-5p][hsa-miR-130b-5p;hsa-miR-135b-5p][hsa-miR-130b-5p;hsa-miR-135b-5p;hsa-miR-193a-3p][hsa-miR-199a-5p;hsa-miR-23b-3p][hsa-miR-199a-5p;hsa-miR-520a-3p]
CADM2	7	[hsa-let-7e-5p;hsa-miR-19b-1-5p][hsa-miR-1224-5p;hsa-miR-1284][hsa-miR-1284;hsa-miR-489][hsa-miR-1284;hsa-miR-489;hsa-miR-889][hsa-miR-452-5p;hsa-miR-497-3p][hsa-miR-452-5p;hsa-miR-497-3p;hsa-miR-607][hsa-miR-486-5p;hsa-miR-497-3p]
CADM3	5	[hsa-let-7i-3p;hsa-miR-155-5p][hsa-let-7i-3p;hsa-miR-155-5p;hsa-miR-548b-5p][hsa-let-7i-3p;hsa-miR-19b-3p;hsa-miR-548b-5p][hsa-let-7i-3p;hsa-miR-299-5p;hsa-miR-548b-5p][hsa-let-7i-3p;hsa-miR-548b-5p;hsa-miR-632]
CADM4	6	[hsa-let-7b-3p;hsa-miR-130b-5p;hsa-miR-335-3p][hsa-let-7d-3p;hsa-miR-362-5p][hsa-miR-130b-5p;hsa-miR-3138;hsa-miR-335-3p][hsa-miR-130b-5p;hsa-miR-335-3p][hsa-miR-130b-5p;hsa-miR-335-3p;hsa-miR-542-3p][hsa-miR-140-5p;hsa-miR-485-3p]
CADPS	7	[hsa-miR-124-3p;hsa-miR-1287;hsa-miR-30d-5p][hsa-miR-124-3p;hsa-miR-194-5p;hsa-miR-30d-5p][hsa-miR-186-5p;hsa-miR-30d-5p;hsa-miR-582-3p][hsa-miR-194-5p;hsa-miR-376c][hsa-miR-30d-5p;hsa-miR-3143;hsa-miR-582-3p][hsa-miR-30d-5p;hsa-miR-582-3p][hsa-miR-30d-5p;hsa-miR-935]
CADPS2	6	[hsa-miR-1237;hsa-miR-362-3p;hsa-miR-3654][hsa-miR-1237;hsa-miR-3654][hsa-miR-141-3p;hsa-miR-20a-3p][hsa-miR-141-3p;hsa-miR-20a-3p;hsa-miR-3654][hsa-miR-20a-3p;hsa-miR-3654][hsa-miR-217;hsa-miR-494]
CAGE1	2	[hsa-miR-1236;hsa-miR-452-5p][hsa-miR-3690;hsa-miR-452-5p]
CALB1	7	[hsa-let-7g-5p;hsa-miR-30d-3p][hsa-miR-1269a;hsa-miR-193a-3p;hsa-miR-30d-3p][hsa-miR-1269a;hsa-miR-30d-3p][hsa-miR-1269a;hsa-miR-30d-3p;hsa-miR-323a-3p][hsa-miR-1269a;hsa-miR-30d-3p;hsa-miR-486-3p][hsa-miR-1269a;hsa-miR-30d-3p;hsa-miR-577][hsa-miR-186-5p;hsa-miR-466]
CALB2	8	[hsa-miR-135b-3p;hsa-miR-154-3p][hsa-miR-135b-3p;hsa-miR-154-3p;hsa-miR-885-5p][hsa-miR-135b-3p;hsa-miR-3607-3p][hsa-miR-183-3p;hsa-miR-30b-5p][hsa-miR-183-3p;hsa-miR-30b-5p;hsa-miR-3682-3p][hsa-miR-216a;hsa-miR-30b-5p;hsa-miR-3682-3p][hsa-miR-30b-5p;hsa-miR-3682-3p][hsa-miR-30b-5p;hsa-miR-3682-3p;hsa-miR-517b-3p]
CALCA	1	[hsa-miR-330-5p;hsa-miR-374b-3p]
CALCB	5	[hsa-let-7b-3p;hsa-miR-1229;hsa-miR-18a-5p][hsa-let-7b-3p;hsa-miR-18a-5p][hsa-miR-1265;hsa-miR-18a-5p][hsa-miR-1265;hsa-miR-18a-5p;hsa-miR-18b-5p][hsa-miR-18a-5p;hsa-miR-18b-5p]
CALCOCO1	6	[hsa-miR-146a-3p;hsa-miR-616-5p][hsa-miR-27a-3p;hsa-miR-3613-3p;hsa-miR-3919][hsa-miR-27a-3p;hsa-miR-376b;hsa-miR-506-3p][hsa-miR-27a-3p;hsa-miR-3919][hsa-miR-27a-3p;hsa-miR-506-3p][hsa-miR-27b-3p;hsa-miR-616-5p]
CALCOCO2	5	[hsa-miR-1912;hsa-miR-449c-5p][hsa-miR-1912;hsa-miR-449c-5p;hsa-miR-93-5p][hsa-miR-1912;hsa-miR-93-5p][hsa-miR-1912;hsa-miR-940][hsa-miR-375;hsa-miR-449c-5p]
CALCR	5	[hsa-miR-101-3p;hsa-miR-23b-3p;hsa-miR-23c][hsa-miR-101-3p;hsa-miR-23c][hsa-miR-23c;hsa-miR-421][hsa-miR-34c-5p;hsa-miR-449b-5p][hsa-miR-34c-5p;hsa-miR-607]
CALCRL	6	[hsa-let-7a-3p;hsa-miR-1287;hsa-miR-218-5p][hsa-let-7a-3p;hsa-miR-206][hsa-let-7a-3p;hsa-miR-218-5p][hsa-miR-1226-3p;hsa-miR-205-5p][hsa-miR-1226-3p;hsa-miR-205-5p;hsa-miR-218-5p][hsa-miR-362-3p;hsa-miR-500a-5p]
CALD1	6	[hsa-miR-1251;hsa-miR-589-3p][hsa-miR-1539;hsa-miR-217][hsa-miR-199b-3p;hsa-miR-513a-5p;hsa-miR-519a-5p][hsa-miR-199b-3p;hsa-miR-519a-5p][hsa-miR-199b-3p;hsa-miR-654-3p][hsa-miR-30b-5p;hsa-miR-30e-5p]
CALHM1	3	[hsa-miR-34a-5p;hsa-miR-34c-5p][hsa-miR-34a-5p;hsa-miR-34c-5p;hsa-miR-449b-5p][hsa-miR-34a-5p;hsa-miR-449b-5p]
CALM1	5	[hsa-miR-148a-3p;hsa-miR-19b-3p;hsa-miR-497-3p][hsa-miR-148a-3p;hsa-miR-19b-3p;hsa-miR-497-5p][hsa-miR-148a-3p;hsa-miR-19b-3p;hsa-miR-660-5p][hsa-miR-218-5p;hsa-miR-579][hsa-miR-30a-3p;hsa-miR-548v]
CALM2	5	[hsa-let-7b-3p;hsa-miR-143-5p;hsa-miR-548q][hsa-miR-1301;hsa-miR-570-3p][hsa-miR-1301;hsa-miR-570-3p;hsa-miR-582-3p][hsa-miR-1306-3p;hsa-miR-3911;hsa-miR-449b-3p][hsa-miR-3911;hsa-miR-449b-3p]
CALM3	8	[hsa-miR-16-2-3p;hsa-miR-27a-3p;hsa-miR-338-5p][hsa-miR-196a-5p;hsa-miR-27a-3p;hsa-miR-3065-3p][hsa-miR-27a-3p;hsa-miR-29b-3p][hsa-miR-27a-3p;hsa-miR-29b-3p;hsa-miR-570-3p][hsa-miR-27a-3p;hsa-miR-3065-3p][hsa-miR-27a-3p;hsa-miR-320e][hsa-miR-27a-3p;hsa-miR-338-5p][hsa-miR-27a-3p;hsa-miR-338-5p;hsa-miR-7-5p]
CALML4	6	[hsa-miR-10a-3p;hsa-miR-140-5p;hsa-miR-376a-5p][hsa-miR-140-5p;hsa-miR-150-5p][hsa-miR-140-5p;hsa-miR-2110][hsa-miR-140-5p;hsa-miR-561-3p][hsa-miR-215;hsa-miR-3662][hsa-miR-218-1-3p;hsa-miR-3662]
CALN1	7	[hsa-miR-135a-5p;hsa-miR-410][hsa-miR-135b-5p;hsa-miR-142-5p;hsa-miR-410][hsa-miR-142-5p;hsa-miR-379-5p;hsa-miR-410][hsa-miR-142-5p;hsa-miR-410][hsa-miR-143-3p;hsa-miR-410][hsa-miR-143-3p;hsa-miR-410;hsa-miR-939][hsa-miR-340-5p;hsa-miR-410]
CALR	7	[hsa-miR-148a-3p;hsa-miR-148b-3p;hsa-miR-181c-5p][hsa-miR-148a-3p;hsa-miR-181a-5p][hsa-miR-148a-3p;hsa-miR-181c-5p][hsa-miR-148a-5p;hsa-miR-600][hsa-miR-152;hsa-miR-600][hsa-miR-342-3p;hsa-miR-455-3p][hsa-miR-516a-5p;hsa-miR-600]
CALU	5	[hsa-let-7e-5p;hsa-miR-16-5p;hsa-miR-29c-3p][hsa-let-7e-5p;hsa-miR-195-5p;hsa-miR-29c-3p][hsa-let-7e-5p;hsa-miR-29c-3p][hsa-miR-1224-5p;hsa-miR-140-5p][hsa-miR-1276;hsa-miR-30b-5p]
CAMK1	5	[hsa-miR-18a-5p;hsa-miR-18b-5p;hsa-miR-3173-3p][hsa-miR-18a-5p;hsa-miR-204-5p][hsa-miR-18a-5p;hsa-miR-204-5p;hsa-miR-556-3p][hsa-miR-18b-5p;hsa-miR-643][hsa-miR-204-5p;hsa-miR-494]
CAMK1D	6	[hsa-let-7f-2-3p;hsa-miR-135b-5p;hsa-miR-338-5p][hsa-miR-135b-5p;hsa-miR-338-5p;hsa-miR-516a-5p][hsa-miR-135b-5p;hsa-miR-338-5p;hsa-miR-624-5p][hsa-miR-3065-3p;hsa-miR-329;hsa-miR-514a-3p][hsa-miR-3065-3p;hsa-miR-516a-5p][hsa-miR-329;hsa-miR-514a-3p]
CAMK1G	2	[hsa-miR-135b-5p;hsa-miR-214-5p;hsa-miR-548s][hsa-miR-214-5p;hsa-miR-548s;hsa-miR-7-5p]
CAMK2A	7	[hsa-miR-148b-3p;hsa-miR-340-5p][hsa-miR-148b-3p;hsa-miR-340-5p;hsa-miR-556-3p][hsa-miR-148b-3p;hsa-miR-340-5p;hsa-miR-570-3p][hsa-miR-148b-3p;hsa-miR-556-3p][hsa-miR-148b-3p;hsa-miR-556-3p;hsa-miR-570-3p][hsa-miR-148b-3p;hsa-miR-570-3p][hsa-miR-152;hsa-miR-574-5p]
CAMK2B	5	[hsa-miR-1285-3p;hsa-miR-21-3p;hsa-miR-7-2-3p][hsa-miR-1285-3p;hsa-miR-545-3p][hsa-miR-1285-3p;hsa-miR-7-1-3p;hsa-miR-7-2-3p][hsa-miR-381;hsa-miR-7-2-3p][hsa-miR-7-1-3p;hsa-miR-7-2-3p]
CAMK2D	7	[hsa-miR-103a-2-5p;hsa-miR-203][hsa-miR-129-5p;hsa-miR-223-5p][hsa-miR-203;hsa-miR-3150b-3p;hsa-miR-3161][hsa-miR-203;hsa-miR-3161][hsa-miR-203;hsa-miR-3161;hsa-miR-4284][hsa-miR-203;hsa-miR-3161;hsa-miR-455-3p][hsa-miR-223-5p;hsa-miR-30b-5p;hsa-miR-676-5p]
CAMK2G	8	[hsa-miR-107;hsa-miR-181b-5p][hsa-miR-107;hsa-miR-2278][hsa-miR-107;hsa-miR-30a-3p][hsa-miR-107;hsa-miR-30a-3p;hsa-miR-3115][hsa-miR-107;hsa-miR-30a-3p;hsa-miR-3136-5p][hsa-miR-107;hsa-miR-30a-3p;hsa-miR-616-5p][hsa-miR-519c-3p;hsa-miR-520a-5p;hsa-miR-891a][hsa-miR-519c-3p;hsa-miR-891a]
CAMK2N1	7	[hsa-miR-1275;hsa-miR-148a-5p;hsa-miR-9-5p][hsa-miR-1275;hsa-miR-9-5p][hsa-miR-129-5p;hsa-miR-148a-5p][hsa-miR-148a-5p;hsa-miR-19a-3p;hsa-miR-653][hsa-miR-148a-5p;hsa-miR-653][hsa-miR-30d-5p;hsa-miR-455-3p][hsa-miR-30d-5p;hsa-miR-455-3p;hsa-miR-526b-5p]
CAMK2N2	7	[hsa-miR-129-5p;hsa-miR-296-5p;hsa-miR-934][hsa-miR-129-5p;hsa-miR-934][hsa-miR-20b-5p;hsa-miR-9-5p][hsa-miR-30d-5p;hsa-miR-9-5p;hsa-miR-934][hsa-miR-30d-5p;hsa-miR-934][hsa-miR-377-3p;hsa-miR-9-5p][hsa-miR-9-5p;hsa-miR-934]
CAMK4	6	[hsa-miR-1228-3p;hsa-miR-33b-5p][hsa-miR-129-5p;hsa-miR-33a-5p][hsa-miR-3692-3p;hsa-miR-582-3p][hsa-miR-500a-3p;hsa-miR-582-3p;hsa-miR-96-3p][hsa-miR-582-3p;hsa-miR-628-5p][hsa-miR-582-3p;hsa-miR-96-3p]
CAMKK1	1	[hsa-miR-103a-3p;hsa-miR-19a-3p;hsa-miR-19b-3p]
CAMKK2	7	[hsa-miR-153;hsa-miR-29a-3p][hsa-miR-18a-5p;hsa-miR-29a-3p;hsa-miR-411-5p][hsa-miR-18b-5p;hsa-miR-29a-3p;hsa-miR-411-5p][hsa-miR-18b-5p;hsa-miR-29a-3p;hsa-miR-9-5p][hsa-miR-19a-5p;hsa-miR-29a-3p;hsa-miR-411-5p][hsa-miR-29a-3p;hsa-miR-411-5p][hsa-miR-29a-3p;hsa-miR-9-5p]
CAMKV	5	[hsa-miR-125b-5p;hsa-miR-135b-3p;hsa-miR-188-3p][hsa-miR-135b-3p;hsa-miR-188-3p][hsa-miR-135b-3p;hsa-miR-188-3p;hsa-miR-496][hsa-miR-135b-3p;hsa-miR-188-3p;hsa-miR-582-3p][hsa-miR-188-3p;hsa-miR-496]
CAMLG	4	[hsa-miR-30a-5p;hsa-miR-30b-5p;hsa-miR-30e-5p][hsa-miR-30b-5p;hsa-miR-30d-5p;hsa-miR-625-5p][hsa-miR-30d-5p;hsa-miR-625-5p][hsa-miR-30e-5p;hsa-miR-625-5p]
CAMSAP1	7	[hsa-miR-16-5p;hsa-miR-195-5p;hsa-miR-455-5p][hsa-miR-16-5p;hsa-miR-34c-5p;hsa-miR-455-5p][hsa-miR-16-5p;hsa-miR-455-5p][hsa-miR-195-5p;hsa-miR-26a-5p;hsa-miR-802][hsa-miR-26a-5p;hsa-miR-26b-5p][hsa-miR-26a-5p;hsa-miR-802][hsa-miR-342-3p;hsa-miR-34c-5p;hsa-miR-455-5p]
CAMSAP2	8	[hsa-let-7a-2-3p;hsa-miR-105-5p][hsa-let-7a-2-3p;hsa-miR-148a-3p][hsa-let-7a-2-3p;hsa-miR-23a-3p][hsa-let-7a-2-3p;hsa-miR-429][hsa-miR-101-3p;hsa-miR-26a-5p][hsa-miR-130a-5p;hsa-miR-26a-5p][hsa-miR-199b-5p;hsa-miR-20a-5p;hsa-miR-26a-5p][hsa-miR-199b-5p;hsa-miR-26a-5p]
CAMSAP3	6	[hsa-miR-125a-5p;hsa-miR-150-5p][hsa-miR-125b-5p;hsa-miR-1286][hsa-miR-125b-5p;hsa-miR-1286;hsa-miR-532-3p][hsa-miR-125b-5p;hsa-miR-1286;hsa-miR-625-5p][hsa-miR-125b-5p;hsa-miR-625-5p][hsa-miR-1291;hsa-miR-625-5p]
CAMTA1	7	[hsa-miR-1288;hsa-miR-519a-5p][hsa-miR-1301;hsa-miR-200a-5p][hsa-miR-1301;hsa-miR-200a-5p;hsa-miR-3691-5p][hsa-miR-200a-5p;hsa-miR-4289][hsa-miR-20a-3p;hsa-miR-505-3p][hsa-miR-323a-3p;hsa-miR-519a-5p][hsa-miR-381;hsa-miR-519a-5p]
CAMTA2	9	[hsa-miR-125b-2-3p;hsa-miR-18a-5p][hsa-miR-181b-5p;hsa-miR-181d;hsa-miR-18a-5p][hsa-miR-181d;hsa-miR-18a-5p][hsa-miR-181d;hsa-miR-18a-5p;hsa-miR-20a-5p][hsa-miR-181d;hsa-miR-18a-5p;hsa-miR-486-3p][hsa-miR-181d;hsa-miR-18a-5p;hsa-miR-582-5p][hsa-miR-18a-5p;hsa-miR-3135a][hsa-miR-18a-5p;hsa-miR-486-3p][hsa-miR-18a-5p;hsa-miR-501-3p]
CAND1	6	[hsa-miR-143-5p;hsa-miR-466;hsa-miR-7-5p][hsa-miR-148a-3p;hsa-miR-29a-3p;hsa-miR-429][hsa-miR-148b-3p;hsa-miR-495][hsa-miR-183-5p;hsa-miR-29a-3p;hsa-miR-429][hsa-miR-466;hsa-miR-7-5p][hsa-miR-7-5p;hsa-miR-92b-3p]
CAND2	2	[hsa-miR-124-3p;hsa-miR-518b][hsa-miR-3202;hsa-miR-518b;hsa-miR-544b]
CANX	8	[hsa-miR-128;hsa-miR-148b-3p][hsa-miR-128;hsa-miR-148b-3p;hsa-miR-30a-3p][hsa-miR-128;hsa-miR-200a-3p][hsa-miR-128;hsa-miR-200a-3p;hsa-miR-3913-5p][hsa-miR-128;hsa-miR-200a-3p;hsa-miR-424-5p][hsa-miR-138-5p;hsa-miR-195-5p;hsa-miR-505-3p][hsa-miR-195-5p;hsa-miR-30d-3p][hsa-miR-195-5p;hsa-miR-505-3p]
CAP1	5	[hsa-let-7f-5p;hsa-miR-3168;hsa-miR-3927][hsa-miR-1248;hsa-miR-3168;hsa-miR-3927][hsa-miR-152;hsa-miR-98][hsa-miR-153;hsa-miR-3168][hsa-miR-153;hsa-miR-3168;hsa-miR-3927]
CAP2	6	[hsa-miR-135a-5p;hsa-miR-135b-5p;hsa-miR-2114-3p][hsa-miR-135b-5p;hsa-miR-2114-3p][hsa-miR-135b-5p;hsa-miR-2114-3p;hsa-miR-449b-3p][hsa-miR-205-3p;hsa-miR-377-3p][hsa-miR-2115-3p;hsa-miR-377-3p;hsa-miR-449b-3p][hsa-miR-377-3p;hsa-miR-582-5p]
CAPN12	6	[hsa-miR-103a-3p;hsa-miR-29b-2-5p;hsa-miR-340-3p][hsa-miR-103a-3p;hsa-miR-29b-2-5p;hsa-miR-380-3p][hsa-miR-107;hsa-miR-29b-2-5p;hsa-miR-452-5p][hsa-miR-29b-2-5p;hsa-miR-3191-3p;hsa-miR-340-3p][hsa-miR-29b-2-5p;hsa-miR-340-3p][hsa-miR-29b-2-5p;hsa-miR-452-5p;hsa-miR-497-3p]
CAPN14	5	[hsa-miR-153;hsa-miR-934][hsa-miR-204-5p;hsa-miR-449b-5p][hsa-miR-204-5p;hsa-miR-449b-5p;hsa-miR-934][hsa-miR-204-5p;hsa-miR-934][hsa-miR-541-3p;hsa-miR-934]
CAPN2	1	[hsa-miR-31-3p;hsa-miR-889]
CAPN3	1	[hsa-miR-135b-5p;hsa-miR-532-5p]
CAPN6	6	[hsa-miR-135b-3p;hsa-miR-574-5p][hsa-miR-2355-5p;hsa-miR-29c-3p;hsa-miR-3622a-3p][hsa-miR-2355-5p;hsa-miR-3622a-3p][hsa-miR-29c-3p;hsa-miR-3622a-3p][hsa-miR-30e-3p;hsa-miR-3622a-3p][hsa-miR-3622a-3p;hsa-miR-424-5p]
CAPN7	3	[hsa-miR-29a-3p;hsa-miR-29c-3p;hsa-miR-3942-5p][hsa-miR-29a-3p;hsa-miR-3065-5p;hsa-miR-3942-5p][hsa-miR-29a-3p;hsa-miR-3942-5p;hsa-miR-520g]
CAPN9	2	[hsa-miR-449a;hsa-miR-449b-5p;hsa-miR-585][hsa-miR-449b-5p;hsa-miR-585]
CAPNS2	1	[hsa-miR-135b-3p;hsa-miR-296-3p]
CAPRIN1	7	[hsa-miR-181a-5p;hsa-miR-29a-3p][hsa-miR-181a-5p;hsa-miR-29a-3p;hsa-miR-486-5p][hsa-miR-195-5p;hsa-miR-29a-3p][hsa-miR-27a-5p;hsa-miR-29a-3p][hsa-miR-29a-3p;hsa-miR-374b-5p][hsa-miR-30a-3p;hsa-miR-378a-5p][hsa-miR-30a-3p;hsa-miR-378a-5p;hsa-miR-651]
CAPRIN2	7	[hsa-miR-1304-5p;hsa-miR-374c-5p][hsa-miR-221-3p;hsa-miR-33a-5p;hsa-miR-374c-5p][hsa-miR-221-3p;hsa-miR-374c-5p][hsa-miR-221-3p;hsa-miR-374c-5p;hsa-miR-454-3p][hsa-miR-34a-5p;hsa-miR-34b-5p][hsa-miR-499a-3p;hsa-miR-526b-5p][hsa-miR-526b-5p;hsa-miR-582-5p]
CAPS	5	[hsa-miR-16-2-3p;hsa-miR-25-3p][hsa-miR-181b-5p;hsa-miR-219-5p][hsa-miR-19b-2-5p;hsa-miR-217][hsa-miR-203;hsa-miR-217;hsa-miR-491-3p][hsa-miR-217;hsa-miR-491-3p]
CAPSL	3	[hsa-miR-449b-3p;hsa-miR-505-5p][hsa-miR-449b-3p;hsa-miR-505-5p;hsa-miR-579][hsa-miR-449b-3p;hsa-miR-579]
CAPZA1	6	[hsa-miR-1914-5p;hsa-miR-34c-3p][hsa-miR-3065-5p;hsa-miR-30b-5p][hsa-miR-30b-5p;hsa-miR-362-5p][hsa-miR-30b-5p;hsa-miR-548f][hsa-miR-449a;hsa-miR-581][hsa-miR-509-3p;hsa-miR-581]
CAPZA2	6	[hsa-let-7a-2-3p;hsa-miR-135b-5p][hsa-let-7a-2-3p;hsa-miR-374b-5p][hsa-let-7a-2-3p;hsa-miR-3940-3p][hsa-miR-1248;hsa-miR-33a-5p][hsa-miR-374b-5p;hsa-miR-424-5p][hsa-miR-374b-5p;hsa-miR-424-5p;hsa-miR-605]
CAPZB	5	[hsa-miR-140-3p;hsa-miR-3202][hsa-miR-186-3p;hsa-miR-30b-3p][hsa-miR-186-3p;hsa-miR-30b-3p;hsa-miR-491-3p][hsa-miR-186-3p;hsa-miR-30b-3p;hsa-miR-576-5p][hsa-miR-491-3p;hsa-miR-942]
CARD10	4	[hsa-miR-155-5p;hsa-miR-15b-5p;hsa-miR-424-5p][hsa-miR-15b-5p;hsa-miR-195-5p][hsa-miR-16-5p;hsa-miR-195-5p][hsa-miR-16-5p;hsa-miR-195-5p;hsa-miR-424-5p]
CARD11	6	[hsa-miR-155-5p;hsa-miR-181a-5p][hsa-miR-155-5p;hsa-miR-181a-5p;hsa-miR-181c-5p][hsa-miR-155-5p;hsa-miR-181b-5p;hsa-miR-362-3p][hsa-miR-155-5p;hsa-miR-181c-5p][hsa-miR-155-5p;hsa-miR-181c-5p;hsa-miR-362-3p][hsa-miR-155-5p;hsa-miR-362-3p]
CARD17	1	[hsa-miR-512-3p;hsa-miR-664-5p]
CARD8	5	[hsa-miR-103a-2-5p;hsa-miR-23a-3p;hsa-miR-577][hsa-miR-1236;hsa-miR-23a-3p;hsa-miR-532-5p][hsa-miR-1248;hsa-miR-23a-3p][hsa-miR-1248;hsa-miR-23a-3p;hsa-miR-532-5p][hsa-miR-23a-3p;hsa-miR-532-5p]
CARM1	5	[hsa-miR-16-5p;hsa-miR-26a-5p][hsa-miR-181a-5p;hsa-miR-335-3p;hsa-miR-497-5p][hsa-miR-26a-5p;hsa-miR-3613-5p][hsa-miR-26a-5p;hsa-miR-424-5p][hsa-miR-26a-5p;hsa-miR-424-5p;hsa-miR-497-5p]
CARTPT	9	[hsa-let-7b-3p;hsa-miR-21-3p;hsa-miR-221-3p][hsa-miR-126-5p;hsa-miR-21-3p;hsa-miR-335-3p][hsa-miR-21-3p;hsa-miR-2110;hsa-miR-335-3p][hsa-miR-21-3p;hsa-miR-214-3p;hsa-miR-335-3p][hsa-miR-21-3p;hsa-miR-221-3p][hsa-miR-21-3p;hsa-miR-223-5p;hsa-miR-335-3p][hsa-miR-21-3p;hsa-miR-335-3p][hsa-miR-21-3p;hsa-miR-335-3p;hsa-miR-377-3p][hsa-miR-21-3p;hsa-miR-335-3p;hsa-miR-607]
CASC1	6	[hsa-miR-103a-3p;hsa-miR-107;hsa-miR-197-3p][hsa-miR-103a-3p;hsa-miR-107;hsa-miR-203][hsa-miR-107;hsa-miR-197-3p][hsa-miR-195-5p;hsa-miR-197-3p][hsa-miR-203;hsa-miR-3607-5p;hsa-miR-424-5p][hsa-miR-203;hsa-miR-424-5p]
CASC3	8	[hsa-miR-1285-3p;hsa-miR-224-5p][hsa-miR-1285-3p;hsa-miR-224-5p;hsa-miR-449a][hsa-miR-1285-3p;hsa-miR-224-5p;hsa-miR-506-3p][hsa-miR-1285-3p;hsa-miR-224-5p;hsa-miR-616-5p][hsa-miR-1285-3p;hsa-miR-3150b-3p][hsa-miR-1285-3p;hsa-miR-3150b-3p;hsa-miR-544b][hsa-miR-1285-3p;hsa-miR-449a;hsa-miR-506-3p][hsa-miR-1285-3p;hsa-miR-506-3p]
CASC4	6	[hsa-miR-19a-3p;hsa-miR-32-3p][hsa-miR-200a-3p;hsa-miR-3682-3p;hsa-miR-374c-5p][hsa-miR-203;hsa-miR-545-5p][hsa-miR-205-5p;hsa-miR-3682-3p][hsa-miR-3682-3p;hsa-miR-374c-5p;hsa-miR-429][hsa-miR-3682-3p;hsa-miR-374c-5p;hsa-miR-493-5p]
CASD1	8	[hsa-let-7b-3p;hsa-miR-205-5p;hsa-miR-577][hsa-miR-1243;hsa-miR-577][hsa-miR-130a-3p;hsa-miR-205-5p;hsa-miR-577][hsa-miR-205-5p;hsa-miR-577][hsa-miR-222-5p;hsa-miR-532-3p][hsa-miR-25-3p;hsa-miR-577;hsa-miR-92a-3p][hsa-miR-519a-3p;hsa-miR-577;hsa-miR-92a-3p][hsa-miR-577;hsa-miR-92a-3p]
CASK	6	[hsa-let-7b-3p;hsa-miR-146a-5p][hsa-let-7b-3p;hsa-miR-146a-5p;hsa-miR-331-3p][hsa-let-7g-5p;hsa-miR-146a-5p][hsa-miR-124-3p;hsa-miR-3143][hsa-miR-124-3p;hsa-miR-885-5p][hsa-miR-609;hsa-miR-651]
CASKIN1	7	[hsa-let-7e-5p;hsa-miR-200c-3p][hsa-let-7e-5p;hsa-miR-200c-3p;hsa-miR-374c-5p][hsa-let-7g-5p;hsa-miR-374c-5p][hsa-let-7g-5p;hsa-miR-429][hsa-miR-21-5p;hsa-miR-224-3p][hsa-miR-224-3p;hsa-miR-3910;hsa-miR-506-3p][hsa-miR-224-3p;hsa-miR-506-3p]
CASKIN2	7	[hsa-miR-10a-3p;hsa-miR-423-5p;hsa-miR-449c-5p][hsa-miR-1;hsa-miR-128;hsa-miR-449c-5p][hsa-miR-1;hsa-miR-1468;hsa-miR-449c-5p][hsa-miR-1;hsa-miR-423-5p;hsa-miR-449c-5p][hsa-miR-423-5p;hsa-miR-449c-5p][hsa-miR-423-5p;hsa-miR-449c-5p;hsa-miR-543][hsa-miR-423-5p;hsa-miR-449c-5p;hsa-miR-625-5p]
CASP14	2	[hsa-miR-140-3p;hsa-miR-22-3p][hsa-miR-140-3p;hsa-miR-513a-3p]
CASP2	5	[hsa-miR-19b-3p;hsa-miR-33b-5p][hsa-miR-204-5p;hsa-miR-21-3p;hsa-miR-551a][hsa-miR-204-5p;hsa-miR-3914][hsa-miR-204-5p;hsa-miR-551a][hsa-miR-204-5p;hsa-miR-96-3p]
CASP3	5	[hsa-let-7b-5p;hsa-let-7c;hsa-let-7i-5p][hsa-let-7b-5p;hsa-let-7i-5p][hsa-let-7c;hsa-let-7d-5p;hsa-miR-508-3p][hsa-let-7e-5p;hsa-let-7f-5p;hsa-let-7g-5p][hsa-let-7f-5p;hsa-let-7g-5p;hsa-let-7i-5p]
CASP6	1	[hsa-miR-105-5p;hsa-miR-129-5p]
CASP7	6	[hsa-miR-106a-5p;hsa-miR-20a-5p;hsa-miR-9-3p][hsa-miR-106a-5p;hsa-miR-23a-3p;hsa-miR-9-3p][hsa-miR-106a-5p;hsa-miR-9-3p][hsa-miR-130a-5p;hsa-miR-17-5p][hsa-miR-17-5p;hsa-miR-20b-5p;hsa-miR-23b-3p][hsa-miR-17-5p;hsa-miR-20b-5p;hsa-miR-335-5p]
CASP8AP2	8	[hsa-let-7b-3p;hsa-miR-1306-3p][hsa-let-7f-1-3p;hsa-miR-187-5p][hsa-miR-127-5p;hsa-miR-1306-3p;hsa-miR-505-3p][hsa-miR-1306-3p;hsa-miR-2110;hsa-miR-512-3p][hsa-miR-1306-3p;hsa-miR-505-3p][hsa-miR-1306-3p;hsa-miR-512-3p][hsa-miR-187-5p;hsa-miR-3662][hsa-miR-187-5p;hsa-miR-3662;hsa-miR-505-3p]
CASP9	1	[hsa-miR-1256;hsa-miR-589-5p;hsa-miR-96-5p]
CASQ1	6	[hsa-miR-221-3p;hsa-miR-3065-3p][hsa-miR-221-3p;hsa-miR-3065-3p;hsa-miR-3136-5p][hsa-miR-221-3p;hsa-miR-3065-3p;hsa-miR-323a-3p][hsa-miR-221-3p;hsa-miR-324-3p][hsa-miR-221-3p;hsa-miR-324-3p;hsa-miR-508-5p][hsa-miR-221-3p;hsa-miR-508-5p]
CASR	6	[hsa-miR-103a-3p;hsa-miR-10a-3p;hsa-miR-16-5p][hsa-miR-10a-3p;hsa-miR-15a-5p][hsa-miR-10a-3p;hsa-miR-15a-5p;hsa-miR-20a-3p][hsa-miR-10a-3p;hsa-miR-16-5p;hsa-miR-3150b-3p][hsa-miR-10a-3p;hsa-miR-16-5p;hsa-miR-369-3p][hsa-miR-10a-3p;hsa-miR-369-3p]
CASS4	1	[hsa-miR-495;hsa-miR-542-3p]
CAST	7	[hsa-miR-15a-5p;hsa-miR-16-5p;hsa-miR-224-5p][hsa-miR-16-5p;hsa-miR-19a-3p;hsa-miR-224-5p][hsa-miR-16-5p;hsa-miR-19b-3p;hsa-miR-224-5p][hsa-miR-16-5p;hsa-miR-224-5p][hsa-miR-16-5p;hsa-miR-320c][hsa-miR-16-5p;hsa-miR-320c;hsa-miR-497-5p][hsa-miR-374a-3p;hsa-miR-494;hsa-miR-552]
CASZ1	6	[hsa-miR-107;hsa-miR-135b-5p][hsa-miR-1277-3p;hsa-miR-130b-3p][hsa-miR-1277-3p;hsa-miR-130b-3p;hsa-miR-200b-3p][hsa-miR-130b-3p;hsa-miR-200b-3p][hsa-miR-135b-5p;hsa-miR-214-3p][hsa-miR-200b-3p;hsa-miR-520d-5p]
CATSPER2	4	[hsa-miR-1291;hsa-miR-3065-3p;hsa-miR-570-3p][hsa-miR-19a-3p;hsa-miR-19b-3p;hsa-miR-570-3p][hsa-miR-19b-3p;hsa-miR-570-3p][hsa-miR-3065-3p;hsa-miR-570-3p;hsa-miR-96-3p]
CAV1	6	[hsa-miR-125a-3p;hsa-miR-511;hsa-miR-96-5p][hsa-miR-190a;hsa-miR-199b-5p][hsa-miR-19b-1-5p;hsa-miR-96-5p][hsa-miR-30e-3p;hsa-miR-449c-5p][hsa-miR-3662;hsa-miR-96-5p][hsa-miR-511;hsa-miR-96-5p]
CAV2	8	[hsa-let-7f-2-3p;hsa-miR-29a-3p;hsa-miR-374b-5p][hsa-miR-16-2-3p;hsa-miR-29a-3p;hsa-miR-29b-3p][hsa-miR-222-5p;hsa-miR-29a-5p;hsa-miR-29b-3p][hsa-miR-222-5p;hsa-miR-29b-3p][hsa-miR-222-5p;hsa-miR-29b-3p;hsa-miR-340-5p][hsa-miR-29a-3p;hsa-miR-29b-3p][hsa-miR-29a-3p;hsa-miR-29b-3p;hsa-miR-656][hsa-miR-29a-3p;hsa-miR-374b-5p]
CAV3	3	[hsa-miR-101-3p;hsa-miR-3202][hsa-miR-22-3p;hsa-miR-3202][hsa-miR-3202;hsa-miR-582-5p]
CBFA2T2	6	[hsa-let-7b-3p;hsa-miR-132-3p][hsa-let-7b-3p;hsa-miR-7-1-3p;hsa-miR-9-5p][hsa-let-7b-3p;hsa-miR-9-5p][hsa-let-7f-1-3p;hsa-miR-202-5p;hsa-miR-323a-3p][hsa-let-7f-1-3p;hsa-miR-323a-3p;hsa-miR-495][hsa-let-7f-1-3p;hsa-miR-323a-3p;hsa-miR-7-1-3p]
CBFA2T3	7	[hsa-let-7c;hsa-miR-27a-3p][hsa-miR-15a-5p;hsa-miR-27a-3p;hsa-miR-9-3p][hsa-miR-216b;hsa-miR-27a-3p;hsa-miR-9-3p][hsa-miR-27a-3p;hsa-miR-3650;hsa-miR-9-3p][hsa-miR-27a-3p;hsa-miR-9-3p][hsa-miR-27a-3p;hsa-miR-9-3p;hsa-miR-92b-3p][hsa-miR-27a-3p;hsa-miR-98]
CBFB	7	[hsa-let-7f-1-3p;hsa-miR-20a-5p][hsa-miR-204-5p;hsa-miR-30b-5p][hsa-miR-208a;hsa-miR-20a-5p;hsa-miR-30a-5p][hsa-miR-20a-5p;hsa-miR-30a-5p][hsa-miR-20a-5p;hsa-miR-30a-5p;hsa-miR-454-3p][hsa-miR-26a-5p;hsa-miR-3920;hsa-miR-452-3p][hsa-miR-26a-5p;hsa-miR-452-3p]
CBL	7	[hsa-miR-124-3p;hsa-miR-3065-5p;hsa-miR-31-3p][hsa-miR-224-5p;hsa-miR-3065-5p][hsa-miR-3065-5p;hsa-miR-31-3p][hsa-miR-3065-5p;hsa-miR-3607-3p][hsa-miR-3065-5p;hsa-miR-651][hsa-miR-3607-3p;hsa-miR-512-3p][hsa-miR-506-3p;hsa-miR-512-3p]
CBLB	7	[hsa-let-7f-1-3p;hsa-let-7f-2-3p][hsa-let-7f-1-3p;hsa-let-7f-2-3p;hsa-miR-33b-5p][hsa-let-7f-1-3p;hsa-let-7f-2-3p;hsa-miR-944][hsa-miR-129-5p;hsa-miR-223-3p;hsa-miR-30d-5p][hsa-miR-223-3p;hsa-miR-30a-5p;hsa-miR-30d-5p][hsa-miR-223-3p;hsa-miR-30b-5p;hsa-miR-30d-5p][hsa-miR-223-3p;hsa-miR-30d-5p;hsa-miR-3607-3p]
CBLL1	5	[hsa-miR-148b-3p;hsa-miR-27a-3p][hsa-miR-22-3p;hsa-miR-30d-3p][hsa-miR-22-3p;hsa-miR-455-3p][hsa-miR-26b-5p;hsa-miR-27a-3p][hsa-miR-3667-5p;hsa-miR-502-3p]
CBLN1	7	[hsa-let-7b-3p;hsa-miR-7-5p][hsa-miR-197-3p;hsa-miR-7-5p][hsa-miR-197-3p;hsa-miR-7-5p;hsa-miR-9-3p][hsa-miR-205-3p;hsa-miR-7-5p;hsa-miR-935][hsa-miR-320d;hsa-miR-3916;hsa-miR-7-5p][hsa-miR-7-5p;hsa-miR-9-3p][hsa-miR-7-5p;hsa-miR-935]
CBLN2	4	[hsa-miR-221-3p;hsa-miR-374a-3p;hsa-miR-769-3p][hsa-miR-326;hsa-miR-374a-3p;hsa-miR-3913-5p][hsa-miR-374a-3p;hsa-miR-3913-5p;hsa-miR-769-3p][hsa-miR-374a-3p;hsa-miR-548k]
CBLN3	2	[hsa-miR-1285-3p;hsa-miR-218-5p;hsa-miR-491-5p][hsa-miR-218-5p;hsa-miR-491-5p]
CBLN4	8	[hsa-miR-142-5p;hsa-miR-17-5p;hsa-miR-500a-5p][hsa-miR-17-5p;hsa-miR-34c-5p][hsa-miR-17-5p;hsa-miR-34c-5p;hsa-miR-410][hsa-miR-17-5p;hsa-miR-34c-5p;hsa-miR-539-5p][hsa-miR-17-5p;hsa-miR-500a-5p][hsa-miR-197-3p;hsa-miR-219-1-3p;hsa-miR-3682-3p][hsa-miR-197-3p;hsa-miR-3682-3p][hsa-miR-3166;hsa-miR-3682-3p]
CBR3	1	[hsa-miR-15b-5p;hsa-miR-424-5p]
CBR4	1	[hsa-miR-214-3p;hsa-miR-340-5p]
CBS	1	[hsa-miR-16-2-3p;hsa-miR-494]
CBX1	8	[hsa-miR-101-3p;hsa-miR-105-5p;hsa-miR-223-3p][hsa-miR-101-3p;hsa-miR-200a-3p][hsa-miR-101-3p;hsa-miR-223-3p][hsa-miR-101-3p;hsa-miR-29a-3p][hsa-miR-101-3p;hsa-miR-29a-3p;hsa-miR-3136-5p][hsa-miR-340-5p;hsa-miR-3614-5p;hsa-miR-93-5p][hsa-miR-3614-5p;hsa-miR-93-5p][hsa-miR-542-3p;hsa-miR-93-5p]
CBX2	7	[hsa-miR-124-3p;hsa-miR-18a-5p;hsa-miR-30a-5p][hsa-miR-18a-5p;hsa-miR-18b-5p][hsa-miR-18a-5p;hsa-miR-18b-5p;hsa-miR-98][hsa-miR-18a-5p;hsa-miR-30a-5p][hsa-miR-30a-5p;hsa-miR-3913-5p][hsa-miR-30a-5p;hsa-miR-3913-5p;hsa-miR-506-3p][hsa-miR-30a-5p;hsa-miR-3913-5p;hsa-miR-98]
CBX3	8	[hsa-miR-101-5p;hsa-miR-320b][hsa-miR-1226-3p;hsa-miR-320b][hsa-miR-1265;hsa-miR-320b;hsa-miR-548b-5p][hsa-miR-30a-5p;hsa-miR-320b;hsa-miR-338-5p][hsa-miR-320b;hsa-miR-335-3p][hsa-miR-320b;hsa-miR-338-5p][hsa-miR-320b;hsa-miR-338-5p;hsa-miR-548b-5p][hsa-miR-320b;hsa-miR-548b-5p]
CBX4	6	[hsa-miR-101-3p;hsa-miR-144-3p;hsa-miR-28-3p][hsa-miR-101-3p;hsa-miR-21-3p;hsa-miR-28-3p][hsa-miR-101-3p;hsa-miR-28-3p][hsa-miR-101-3p;hsa-miR-28-3p;hsa-miR-495][hsa-miR-155-5p;hsa-miR-28-3p][hsa-miR-194-5p;hsa-miR-338-3p]
CBX5	8	[hsa-let-7a-5p;hsa-miR-505-3p;hsa-miR-514a-3p][hsa-miR-1248;hsa-miR-514a-3p][hsa-miR-195-5p;hsa-miR-29a-3p;hsa-miR-374c-5p][hsa-miR-29a-3p;hsa-miR-374c-5p][hsa-miR-29a-3p;hsa-miR-3914;hsa-miR-9-5p][hsa-miR-29a-3p;hsa-miR-548y;hsa-miR-9-5p][hsa-miR-29a-3p;hsa-miR-9-5p][hsa-miR-505-3p;hsa-miR-514a-3p]
CBX6	4	[hsa-miR-130b-5p;hsa-miR-182-5p;hsa-miR-450b-5p][hsa-miR-146a-3p;hsa-miR-548o-3p;hsa-miR-570-3p][hsa-miR-183-5p;hsa-miR-29a-3p;hsa-miR-425-5p][hsa-miR-183-5p;hsa-miR-425-5p]
CBX7	6	[hsa-let-7f-2-3p;hsa-miR-130b-3p][hsa-let-7f-2-3p;hsa-miR-130b-3p;hsa-miR-488-5p][hsa-miR-130b-3p;hsa-miR-181c-5p;hsa-miR-3653][hsa-miR-130b-3p;hsa-miR-3653][hsa-miR-181b-5p;hsa-miR-181c-5p;hsa-miR-590-3p][hsa-miR-181b-5p;hsa-miR-590-3p]
CBX8	7	[hsa-miR-1270;hsa-miR-203;hsa-miR-219-1-3p][hsa-miR-1270;hsa-miR-33a-3p;hsa-miR-891a][hsa-miR-1270;hsa-miR-516b-5p][hsa-miR-1270;hsa-miR-891a][hsa-miR-203;hsa-miR-219-1-3p][hsa-miR-203;hsa-miR-219-1-3p;hsa-miR-410][hsa-miR-33a-3p;hsa-miR-516b-5p]
CC2D1A	7	[hsa-miR-218-5p;hsa-miR-452-5p][hsa-miR-372;hsa-miR-570-3p;hsa-miR-9-5p][hsa-miR-452-5p;hsa-miR-570-3p;hsa-miR-9-5p][hsa-miR-508-3p;hsa-miR-570-3p;hsa-miR-9-5p][hsa-miR-518e-3p;hsa-miR-570-3p][hsa-miR-520d-3p;hsa-miR-570-3p][hsa-miR-570-3p;hsa-miR-9-5p]
CC2D1B	4	[hsa-miR-103a-3p;hsa-miR-107;hsa-miR-9-5p][hsa-miR-107;hsa-miR-9-5p][hsa-miR-3142;hsa-miR-9-5p][hsa-miR-506-3p;hsa-miR-9-5p]
CC2D2A	1	[hsa-miR-22-5p;hsa-miR-379-3p]
CCAR1	5	[hsa-let-7a-3p;hsa-let-7b-3p][hsa-let-7a-3p;hsa-let-7b-3p;hsa-miR-3659][hsa-let-7a-3p;hsa-miR-23a-3p][hsa-let-7b-3p;hsa-miR-21-3p][hsa-let-7b-3p;hsa-miR-21-3p;hsa-miR-543]
CCBL2	1	[hsa-miR-338-3p;hsa-miR-3619-5p]
CCBP2	4	[hsa-miR-1260b;hsa-miR-1296;hsa-miR-766-3p][hsa-miR-1260b;hsa-miR-766-3p][hsa-miR-1296;hsa-miR-146a-5p;hsa-miR-766-3p][hsa-miR-1296;hsa-miR-766-3p]
CCDC104	1	[hsa-miR-32-3p;hsa-miR-641]
CCDC106	1	[hsa-miR-32-3p;hsa-miR-576-5p]
CCDC107	4	[hsa-miR-1224-5p;hsa-miR-3691-5p][hsa-miR-3115;hsa-miR-500b][hsa-miR-3691-5p;hsa-miR-500b;hsa-miR-676-3p][hsa-miR-628-3p;hsa-miR-642a-5p;hsa-miR-676-5p]
CCDC108	2	[hsa-miR-205-5p;hsa-miR-2355-5p][hsa-miR-205-5p;hsa-miR-2355-5p;hsa-miR-3913-5p]
CCDC112	6	[hsa-miR-1252;hsa-miR-556-3p][hsa-miR-1252;hsa-miR-556-3p;hsa-miR-7-2-3p][hsa-miR-330-3p;hsa-miR-556-3p;hsa-miR-7-1-3p][hsa-miR-556-3p;hsa-miR-7-1-3p][hsa-miR-556-3p;hsa-miR-7-1-3p;hsa-miR-7-2-3p][hsa-miR-7-1-3p;hsa-miR-7-2-3p]
CCDC113	2	[hsa-miR-182-3p;hsa-miR-3611;hsa-miR-455-5p][hsa-miR-182-3p;hsa-miR-455-5p]
CCDC115	1	[hsa-miR-29b-2-5p;hsa-miR-449c-5p]
CCDC117	7	[hsa-miR-125b-5p;hsa-miR-30d-5p][hsa-miR-125b-5p;hsa-miR-30d-5p;hsa-miR-30e-3p][hsa-miR-125b-5p;hsa-miR-30d-5p;hsa-miR-320b][hsa-miR-181d;hsa-miR-200c-3p;hsa-miR-330-3p][hsa-miR-181d;hsa-miR-200c-3p;hsa-miR-758][hsa-miR-222-5p;hsa-miR-26a-5p;hsa-miR-30d-5p][hsa-miR-222-5p;hsa-miR-30d-5p]
CCDC120	7	[hsa-let-7a-3p;hsa-let-7b-3p;hsa-miR-3607-3p][hsa-let-7a-3p;hsa-let-7f-2-3p;hsa-miR-30e-5p][hsa-let-7a-3p;hsa-miR-199a-5p;hsa-miR-3607-3p][hsa-let-7a-3p;hsa-miR-2355-5p][hsa-let-7a-3p;hsa-miR-2355-5p;hsa-miR-3607-3p][hsa-let-7a-3p;hsa-miR-2355-5p;hsa-miR-570-3p][hsa-let-7a-3p;hsa-miR-3607-3p]
CCDC125	3	[hsa-miR-505-3p;hsa-miR-556-5p][hsa-miR-505-3p;hsa-miR-556-5p;hsa-miR-577][hsa-miR-505-3p;hsa-miR-577]
CCDC126	8	[hsa-miR-10a-3p;hsa-miR-18a-5p;hsa-miR-9-5p][hsa-miR-130b-3p;hsa-miR-18a-5p][hsa-miR-130b-3p;hsa-miR-18a-5p;hsa-miR-660-5p][hsa-miR-181c-5p;hsa-miR-18a-5p;hsa-miR-9-5p][hsa-miR-181d;hsa-miR-18a-5p;hsa-miR-9-5p][hsa-miR-18a-5p;hsa-miR-381;hsa-miR-9-5p][hsa-miR-18a-5p;hsa-miR-7-1-3p;hsa-miR-9-5p][hsa-miR-18a-5p;hsa-miR-767-5p;hsa-miR-9-5p]
CCDC129	5	[hsa-miR-105-5p;hsa-miR-2110;hsa-miR-378a-5p][hsa-miR-2110;hsa-miR-26b-3p;hsa-miR-3149][hsa-miR-2110;hsa-miR-26b-3p;hsa-miR-378a-5p][hsa-miR-2110;hsa-miR-3149;hsa-miR-93-5p][hsa-miR-2110;hsa-miR-378a-5p;hsa-miR-93-5p]
CCDC132	1	[hsa-miR-449c-5p;hsa-miR-548b-3p]
CCDC135	1	[hsa-miR-449a;hsa-miR-449b-5p]
CCDC136	7	[hsa-miR-2115-5p;hsa-miR-346;hsa-miR-34c-5p][hsa-miR-3160-3p;hsa-miR-346;hsa-miR-34c-5p][hsa-miR-3160-3p;hsa-miR-34c-5p][hsa-miR-345-5p;hsa-miR-9-5p][hsa-miR-346;hsa-miR-34c-5p][hsa-miR-548v;hsa-miR-676-3p;hsa-miR-9-5p][hsa-miR-676-3p;hsa-miR-9-5p]
CCDC138	1	[hsa-miR-335-3p;hsa-miR-9-5p]
CCDC14	4	[hsa-miR-30c-2-3p;hsa-miR-3622a-3p][hsa-miR-30c-2-3p;hsa-miR-3622a-3p;hsa-miR-622][hsa-miR-30c-2-3p;hsa-miR-377-3p][hsa-miR-3622a-3p;hsa-miR-622]
CCDC140	7	[hsa-miR-3160-3p;hsa-miR-342-5p;hsa-miR-501-5p][hsa-miR-3160-3p;hsa-miR-450b-5p;hsa-miR-501-5p][hsa-miR-3160-3p;hsa-miR-488-5p][hsa-miR-3160-3p;hsa-miR-501-5p][hsa-miR-3160-3p;hsa-miR-501-5p;hsa-miR-505-5p][hsa-miR-338-5p;hsa-miR-501-5p][hsa-miR-501-5p;hsa-miR-675-3p]
CCDC141	5	[hsa-let-7f-5p;hsa-miR-3607-3p][hsa-let-7f-5p;hsa-miR-3607-3p;hsa-miR-3928][hsa-miR-183-3p;hsa-miR-3607-3p;hsa-miR-3928][hsa-miR-3607-3p;hsa-miR-3928][hsa-miR-3607-3p;hsa-miR-3928;hsa-miR-519a-5p]
CCDC144A	1	[hsa-miR-3928;hsa-miR-549]
CCDC146	4	[hsa-miR-1;hsa-miR-206;hsa-miR-24-2-5p][hsa-miR-1;hsa-miR-24-2-5p][hsa-miR-206;hsa-miR-24-2-5p][hsa-miR-24-1-5p;hsa-miR-24-2-5p]
CCDC147	4	[hsa-miR-130b-5p;hsa-miR-2278;hsa-miR-3690][hsa-miR-130b-5p;hsa-miR-3690][hsa-miR-130b-5p;hsa-miR-3690;hsa-miR-9-5p][hsa-miR-2278;hsa-miR-3690]
CCDC148	7	[hsa-miR-2115-5p;hsa-miR-29b-2-5p;hsa-miR-30d-5p][hsa-miR-29b-2-5p;hsa-miR-30d-5p][hsa-miR-29b-2-5p;hsa-miR-30d-5p;hsa-miR-509-3p][hsa-miR-29b-2-5p;hsa-miR-432-3p][hsa-miR-30a-5p;hsa-miR-369-3p][hsa-miR-30a-5p;hsa-miR-509-3p][hsa-miR-30e-5p;hsa-miR-576-5p]
CCDC149	5	[hsa-miR-27a-3p;hsa-miR-27b-3p][hsa-miR-27a-3p;hsa-miR-27b-3p;hsa-miR-592][hsa-miR-27a-3p;hsa-miR-27b-3p;hsa-miR-616-3p][hsa-miR-512-3p;hsa-miR-592][hsa-miR-512-3p;hsa-miR-616-3p;hsa-miR-766-3p]
CCDC15	1	[hsa-miR-1266;hsa-miR-30a-3p;hsa-miR-30d-3p]
CCDC150	3	[hsa-miR-17-5p;hsa-miR-20a-5p][hsa-miR-17-5p;hsa-miR-20a-5p;hsa-miR-7-1-3p][hsa-miR-20a-5p;hsa-miR-7-1-3p]
CCDC152	7	[hsa-miR-192-5p;hsa-miR-3655][hsa-miR-192-5p;hsa-miR-429][hsa-miR-223-3p;hsa-miR-299-5p;hsa-miR-429][hsa-miR-299-5p;hsa-miR-429][hsa-miR-299-5p;hsa-miR-429;hsa-miR-570-3p][hsa-miR-299-5p;hsa-miR-429;hsa-miR-654-3p][hsa-miR-299-5p;hsa-miR-429;hsa-miR-675-3p]
CCDC158	4	[hsa-miR-101-5p;hsa-miR-23a-3p;hsa-miR-376c][hsa-miR-130a-5p;hsa-miR-21-3p;hsa-miR-23a-3p][hsa-miR-21-3p;hsa-miR-23a-3p][hsa-miR-21-3p;hsa-miR-376c]
CCDC159	3	[hsa-miR-193a-5p;hsa-miR-3127-5p][hsa-miR-3127-5p;hsa-miR-942][hsa-miR-518c-5p;hsa-miR-942]
CCDC168	4	[hsa-miR-223-5p;hsa-miR-27a-3p;hsa-miR-335-3p][hsa-miR-223-5p;hsa-miR-335-3p][hsa-miR-27a-3p;hsa-miR-335-3p][hsa-miR-335-3p;hsa-miR-508-3p]
CCDC169	1	[hsa-miR-10b-3p;hsa-miR-3166]
CCDC170	1	[hsa-miR-146a-5p;hsa-miR-146b-5p]
CCDC171	2	[hsa-miR-1236;hsa-miR-548o-3p;hsa-miR-590-3p][hsa-miR-1236;hsa-miR-590-3p]
CCDC19	1	[hsa-miR-16-5p;hsa-miR-424-5p]
CCDC23	7	[hsa-miR-1236;hsa-miR-141-3p;hsa-miR-22-5p][hsa-miR-1236;hsa-miR-141-3p;hsa-miR-29a-5p][hsa-miR-1236;hsa-miR-22-5p][hsa-miR-1236;hsa-miR-29a-5p][hsa-miR-1270;hsa-miR-141-3p;hsa-miR-22-5p][hsa-miR-141-3p;hsa-miR-22-5p][hsa-miR-141-3p;hsa-miR-539-5p]
CCDC24	5	[hsa-miR-1246;hsa-miR-218-5p;hsa-miR-519a-3p][hsa-miR-218-5p;hsa-miR-26a-1-3p;hsa-miR-519a-3p][hsa-miR-218-5p;hsa-miR-26a-2-3p;hsa-miR-519a-3p][hsa-miR-26a-1-3p;hsa-miR-26a-2-3p;hsa-miR-519a-3p][hsa-miR-26a-1-3p;hsa-miR-3144-3p]
CCDC25	4	[hsa-miR-17-5p;hsa-miR-20a-5p;hsa-miR-93-5p][hsa-miR-17-5p;hsa-miR-20b-5p;hsa-miR-93-5p][hsa-miR-17-5p;hsa-miR-93-5p][hsa-miR-205-3p;hsa-miR-20b-5p;hsa-miR-589-3p]
CCDC28A	4	[hsa-miR-107;hsa-miR-127-5p][hsa-miR-107;hsa-miR-127-5p;hsa-miR-219-5p][hsa-miR-342-3p;hsa-miR-497-5p][hsa-miR-3652;hsa-miR-497-5p]
CCDC28B	5	[hsa-miR-1271-5p;hsa-miR-29c-3p;hsa-miR-500a-3p][hsa-miR-1271-5p;hsa-miR-500a-3p][hsa-miR-128;hsa-miR-224-5p;hsa-miR-500a-3p][hsa-miR-128;hsa-miR-500a-3p][hsa-miR-224-5p;hsa-miR-339-3p;hsa-miR-500a-3p]
CCDC34	5	[hsa-miR-132-3p;hsa-miR-3605-5p][hsa-miR-132-3p;hsa-miR-3605-5p;hsa-miR-3692-3p][hsa-miR-18a-3p;hsa-miR-30b-3p][hsa-miR-18a-3p;hsa-miR-30b-3p;hsa-miR-577][hsa-miR-30b-3p;hsa-miR-577]
CCDC36	2	[hsa-miR-130b-5p;hsa-miR-18a-3p][hsa-miR-18a-3p;hsa-miR-500a-5p]
CCDC39	1	[hsa-miR-548l;hsa-miR-577]
CCDC41	5	[hsa-miR-1271-5p;hsa-miR-944;hsa-miR-99a-3p][hsa-miR-1271-5p;hsa-miR-96-5p;hsa-miR-99a-3p][hsa-miR-1271-5p;hsa-miR-99a-3p][hsa-miR-182-5p;hsa-miR-96-3p][hsa-miR-96-3p;hsa-miR-99a-3p]
CCDC42B	4	[hsa-miR-15a-5p;hsa-miR-31-5p;hsa-miR-503][hsa-miR-15b-5p;hsa-miR-31-5p;hsa-miR-503][hsa-miR-31-5p;hsa-miR-424-5p;hsa-miR-503][hsa-miR-31-5p;hsa-miR-503]
CCDC43	7	[hsa-miR-148a-5p;hsa-miR-30b-5p;hsa-miR-532-3p][hsa-miR-148a-5p;hsa-miR-30c-5p][hsa-miR-148a-5p;hsa-miR-30e-5p;hsa-miR-532-3p][hsa-miR-148a-5p;hsa-miR-3913-5p;hsa-miR-532-3p][hsa-miR-148a-5p;hsa-miR-532-3p][hsa-miR-185-5p;hsa-miR-30c-5p;hsa-miR-30e-5p][hsa-miR-30c-5p;hsa-miR-30e-5p]
CCDC47	5	[hsa-miR-196b-5p;hsa-miR-625-3p][hsa-miR-3662;hsa-miR-625-3p][hsa-miR-374b-5p;hsa-miR-552;hsa-miR-625-3p][hsa-miR-513a-5p;hsa-miR-520e;hsa-miR-625-3p][hsa-miR-520b;hsa-miR-625-3p]
CCDC50	6	[hsa-miR-1245a;hsa-miR-183-3p][hsa-miR-154-3p;hsa-miR-218-5p;hsa-miR-577][hsa-miR-203;hsa-miR-584-5p][hsa-miR-203;hsa-miR-584-5p;hsa-miR-891b][hsa-miR-218-5p;hsa-miR-577][hsa-miR-218-5p;hsa-miR-584-5p]
CCDC58	5	[hsa-miR-101-5p;hsa-miR-194-3p][hsa-miR-101-5p;hsa-miR-194-3p;hsa-miR-432-5p][hsa-miR-16-1-3p;hsa-miR-19b-1-5p;hsa-miR-629-3p][hsa-miR-19b-1-5p;hsa-miR-629-3p][hsa-miR-19b-1-5p;hsa-miR-802]
CCDC59	2	[hsa-miR-193b-5p;hsa-miR-548b-3p][hsa-miR-449c-5p;hsa-miR-548b-3p]
CCDC6	6	[hsa-miR-1285-3p;hsa-miR-30c-5p;hsa-miR-361-5p][hsa-miR-136-5p;hsa-miR-361-5p][hsa-miR-26a-5p;hsa-miR-30c-5p;hsa-miR-361-5p][hsa-miR-30a-3p;hsa-miR-30c-5p;hsa-miR-361-5p][hsa-miR-30c-5p;hsa-miR-361-5p][hsa-miR-30c-5p;hsa-miR-361-5p;hsa-miR-647]
CCDC60	2	[hsa-miR-181a-2-3p;hsa-miR-940][hsa-miR-92a-1-5p;hsa-miR-940]
CCDC62	5	[hsa-miR-10a-3p;hsa-miR-1269a;hsa-miR-539-5p][hsa-miR-10a-3p;hsa-miR-371a-3p;hsa-miR-539-5p][hsa-miR-10a-3p;hsa-miR-376c;hsa-miR-539-5p][hsa-miR-10a-3p;hsa-miR-539-5p][hsa-miR-1269a;hsa-miR-376c;hsa-miR-539-5p]
CCDC64	7	[hsa-miR-181c-5p;hsa-miR-381][hsa-miR-181c-5p;hsa-miR-381;hsa-miR-449a][hsa-miR-19a-3p;hsa-miR-381][hsa-miR-19a-3p;hsa-miR-381;hsa-miR-9-5p][hsa-miR-449b-5p;hsa-miR-576-5p][hsa-miR-532-5p;hsa-miR-9-5p][hsa-miR-607;hsa-miR-9-5p]
CCDC67	6	[hsa-miR-18a-3p;hsa-miR-29b-2-5p][hsa-miR-18a-3p;hsa-miR-29b-2-5p;hsa-miR-516a-5p][hsa-miR-18a-3p;hsa-miR-374b-3p;hsa-miR-516a-5p][hsa-miR-18a-3p;hsa-miR-516a-5p][hsa-miR-22-3p;hsa-miR-452-5p][hsa-miR-29b-2-5p;hsa-miR-32-3p]
CCDC7	5	[hsa-miR-125a-3p;hsa-miR-30c-1-3p][hsa-miR-193b-5p;hsa-miR-30b-3p][hsa-miR-193b-5p;hsa-miR-30b-3p;hsa-miR-30c-2-3p][hsa-miR-30b-3p;hsa-miR-30c-2-3p;hsa-miR-769-3p][hsa-miR-30b-3p;hsa-miR-541-3p;hsa-miR-615-5p]
CCDC70	1	[hsa-miR-330-3p;hsa-miR-3690]
CCDC71	6	[hsa-miR-128;hsa-miR-224-5p;hsa-miR-29b-2-5p][hsa-miR-148b-3p;hsa-miR-152;hsa-miR-29b-2-5p][hsa-miR-148b-3p;hsa-miR-29b-2-5p][hsa-miR-224-5p;hsa-miR-29b-2-5p][hsa-miR-27b-3p;hsa-miR-29b-2-5p][hsa-miR-29b-1-5p;hsa-miR-29b-2-5p]
CCDC71L	7	[hsa-let-7g-5p;hsa-miR-330-3p;hsa-miR-934][hsa-miR-125b-2-3p;hsa-miR-18a-3p;hsa-miR-934][hsa-miR-21-3p;hsa-miR-934][hsa-miR-222-5p;hsa-miR-224-5p][hsa-miR-224-5p;hsa-miR-934][hsa-miR-330-3p;hsa-miR-934][hsa-miR-934;hsa-miR-98]
CCDC73	6	[hsa-miR-196a-3p;hsa-miR-33b-3p][hsa-miR-196a-3p;hsa-miR-425-5p][hsa-miR-30a-3p;hsa-miR-3146][hsa-miR-33b-3p;hsa-miR-378a-3p;hsa-miR-520g][hsa-miR-33b-3p;hsa-miR-425-5p;hsa-miR-520g][hsa-miR-3654;hsa-miR-425-5p]
CCDC74B	1	[hsa-miR-223-3p;hsa-miR-766-3p]
CCDC77	5	[hsa-miR-1248;hsa-miR-184][hsa-miR-1248;hsa-miR-184;hsa-miR-24-1-5p][hsa-miR-184;hsa-miR-204-5p][hsa-miR-184;hsa-miR-204-5p;hsa-miR-24-1-5p][hsa-miR-184;hsa-miR-24-1-5p]
CCDC8	1	[hsa-miR-330-3p;hsa-miR-4284]
CCDC80	5	[hsa-miR-141-3p;hsa-miR-200a-3p;hsa-miR-374b-3p][hsa-miR-141-3p;hsa-miR-200a-3p;hsa-miR-3916][hsa-miR-141-3p;hsa-miR-3678-3p;hsa-miR-374b-3p][hsa-miR-141-3p;hsa-miR-3678-3p;hsa-miR-3916][hsa-miR-141-3p;hsa-miR-374b-3p]
CCDC82	6	[hsa-miR-130a-5p;hsa-miR-146a-3p;hsa-miR-577][hsa-miR-130a-5p;hsa-miR-23c;hsa-miR-577][hsa-miR-130a-5p;hsa-miR-577][hsa-miR-130a-5p;hsa-miR-577;hsa-miR-96-3p][hsa-miR-23b-3p;hsa-miR-577;hsa-miR-96-3p][hsa-miR-577;hsa-miR-96-3p]
CCDC84	2	[hsa-miR-1270;hsa-miR-186-5p][hsa-miR-1270;hsa-miR-186-5p;hsa-miR-551b-5p]
CCDC85A	6	[hsa-miR-101-3p;hsa-miR-590-3p][hsa-miR-145-5p;hsa-miR-301a-3p][hsa-miR-152;hsa-miR-424-3p;hsa-miR-590-3p][hsa-miR-152;hsa-miR-590-3p][hsa-miR-301a-3p;hsa-miR-32-3p;hsa-miR-374b-5p][hsa-miR-424-3p;hsa-miR-590-3p]
CCDC85C	8	[hsa-miR-137;hsa-miR-379-3p][hsa-miR-137;hsa-miR-607][hsa-miR-141-3p;hsa-miR-223-3p;hsa-miR-607][hsa-miR-141-3p;hsa-miR-3168;hsa-miR-607][hsa-miR-141-3p;hsa-miR-607][hsa-miR-200a-3p;hsa-miR-379-3p;hsa-miR-450b-5p][hsa-miR-379-3p;hsa-miR-450b-5p][hsa-miR-507;hsa-miR-607]
CCDC86	1	[hsa-miR-124-3p;hsa-miR-506-3p]
CCDC88A	7	[hsa-miR-106b-5p;hsa-miR-29b-3p][hsa-miR-106b-5p;hsa-miR-29b-3p;hsa-miR-29c-3p][hsa-miR-140-5p;hsa-miR-323a-3p][hsa-miR-140-5p;hsa-miR-493-3p;hsa-miR-93-5p][hsa-miR-140-5p;hsa-miR-7-2-3p][hsa-miR-140-5p;hsa-miR-93-5p][hsa-miR-18a-5p;hsa-miR-493-3p]
CCDC88C	6	[hsa-miR-128;hsa-miR-497-5p][hsa-miR-128;hsa-miR-96-5p][hsa-miR-16-5p;hsa-miR-199b-5p][hsa-miR-195-5p;hsa-miR-497-5p][hsa-miR-195-5p;hsa-miR-96-5p][hsa-miR-199b-5p;hsa-miR-96-5p]
CCDC89	6	[hsa-miR-155-5p;hsa-miR-15b-3p;hsa-miR-636][hsa-miR-15b-3p;hsa-miR-218-5p;hsa-miR-369-3p][hsa-miR-15b-3p;hsa-miR-369-3p][hsa-miR-15b-3p;hsa-miR-369-3p;hsa-miR-374b-5p][hsa-miR-15b-3p;hsa-miR-369-3p;hsa-miR-548l][hsa-miR-15b-3p;hsa-miR-369-3p;hsa-miR-636]
CCDC91	4	[hsa-miR-18b-5p;hsa-miR-411-5p;hsa-miR-495][hsa-miR-18b-5p;hsa-miR-495;hsa-miR-586][hsa-miR-18b-5p;hsa-miR-524-5p][hsa-miR-411-5p;hsa-miR-495]
CCDC92	8	[hsa-miR-148a-3p;hsa-miR-152;hsa-miR-3913-5p][hsa-miR-148b-3p;hsa-miR-152][hsa-miR-148b-3p;hsa-miR-152;hsa-miR-548s][hsa-miR-152;hsa-miR-3913-5p][hsa-miR-152;hsa-miR-3913-5p;hsa-miR-548s][hsa-miR-152;hsa-miR-3913-5p;hsa-miR-551b-5p][hsa-miR-152;hsa-miR-548s;hsa-miR-580][hsa-miR-152;hsa-miR-580]
CCDC93	1	[hsa-miR-577;hsa-miR-653]
CCDC97	1	[hsa-miR-30d-5p;hsa-miR-30e-5p]
CCDC99	2	[hsa-miR-3614-5p;hsa-miR-767-5p][hsa-miR-449b-3p;hsa-miR-767-5p]
CCER1	8	[hsa-miR-1304-5p;hsa-miR-708-3p;hsa-miR-935][hsa-miR-2110;hsa-miR-708-3p;hsa-miR-935][hsa-miR-3183;hsa-miR-708-3p;hsa-miR-935][hsa-miR-3183;hsa-miR-935][hsa-miR-3192;hsa-miR-708-3p;hsa-miR-935][hsa-miR-34a-3p;hsa-miR-708-3p;hsa-miR-935][hsa-miR-374b-5p;hsa-miR-708-3p;hsa-miR-935][hsa-miR-708-3p;hsa-miR-935]
CCK	9	[hsa-miR-146a-5p;hsa-miR-200a-5p][hsa-miR-146a-5p;hsa-miR-200a-5p;hsa-miR-23a-3p][hsa-miR-146a-5p;hsa-miR-200a-5p;hsa-miR-92a-1-5p][hsa-miR-146b-5p;hsa-miR-200a-5p;hsa-miR-23a-3p][hsa-miR-200a-5p;hsa-miR-23a-3p][hsa-miR-200a-5p;hsa-miR-23a-3p;hsa-miR-335-3p][hsa-miR-200a-5p;hsa-miR-23a-3p;hsa-miR-34b-3p][hsa-miR-200a-5p;hsa-miR-335-3p][hsa-miR-200a-5p;hsa-miR-92a-1-5p]
CCKBR	4	[hsa-miR-152;hsa-miR-455-3p;hsa-miR-654-3p][hsa-miR-24-3p;hsa-miR-874][hsa-miR-455-3p;hsa-miR-484;hsa-miR-654-3p][hsa-miR-455-3p;hsa-miR-874]
CCL1	1	[hsa-miR-106a-5p;hsa-miR-17-5p]
CCL13	3	[hsa-miR-3150b-3p;hsa-miR-508-5p;hsa-miR-766-3p][hsa-miR-3150b-3p;hsa-miR-766-3p][hsa-miR-508-5p;hsa-miR-766-3p]
CCL20	5	[hsa-miR-15b-3p;hsa-miR-3679-3p][hsa-miR-15b-3p;hsa-miR-3679-3p;hsa-miR-495][hsa-miR-302a-5p;hsa-miR-3679-3p;hsa-miR-577][hsa-miR-3679-3p;hsa-miR-495][hsa-miR-3679-3p;hsa-miR-577]
CCL21	2	[hsa-miR-148b-5p;hsa-miR-492][hsa-miR-455-3p;hsa-miR-550a-3p]
CCL3	6	[hsa-let-7b-5p;hsa-let-7c][hsa-let-7b-5p;hsa-let-7c;hsa-let-7f-5p][hsa-let-7c;hsa-let-7d-5p;hsa-let-7f-5p][hsa-let-7c;hsa-let-7f-5p][hsa-let-7c;hsa-let-7f-5p;hsa-let-7i-5p][hsa-let-7d-5p;hsa-let-7f-5p]
CCL3L1	1	[hsa-miR-340-5p;hsa-miR-548d-3p]
CCL4	4	[hsa-miR-1185-5p;hsa-miR-625-5p;hsa-miR-99b-5p][hsa-miR-331-3p;hsa-miR-625-5p;hsa-miR-99b-5p][hsa-miR-376b;hsa-miR-625-5p][hsa-miR-625-5p;hsa-miR-99b-5p]
CCL5	6	[hsa-miR-146b-5p;hsa-miR-150-5p][hsa-miR-146b-5p;hsa-miR-150-5p;hsa-miR-335-5p][hsa-miR-146b-5p;hsa-miR-335-5p][hsa-miR-150-5p;hsa-miR-155-5p;hsa-miR-335-5p][hsa-miR-150-5p;hsa-miR-335-5p][hsa-miR-155-5p;hsa-miR-335-5p]
CCL7	7	[hsa-let-7a-5p;hsa-let-7d-5p;hsa-miR-135b-5p][hsa-let-7a-5p;hsa-miR-135b-5p][hsa-let-7a-5p;hsa-miR-135b-5p;hsa-miR-30e-3p][hsa-let-7d-5p;hsa-miR-135b-5p;hsa-miR-30d-3p][hsa-miR-135b-5p;hsa-miR-30a-3p][hsa-miR-135b-5p;hsa-miR-30d-3p][hsa-miR-135b-5p;hsa-miR-30d-3p;hsa-miR-30e-3p]
CCL8	3	[hsa-miR-181b-5p;hsa-miR-2110][hsa-miR-181b-5p;hsa-miR-2110;hsa-miR-944][hsa-miR-2110;hsa-miR-944]
CCM2	5	[hsa-miR-1323;hsa-miR-27a-3p][hsa-miR-146a-3p;hsa-miR-3607-5p][hsa-miR-19a-3p;hsa-miR-19b-3p][hsa-miR-23b-3p;hsa-miR-27a-3p][hsa-miR-27b-3p;hsa-miR-3607-5p]
CCNA2	6	[hsa-miR-22-3p;hsa-miR-513a-5p;hsa-miR-548f][hsa-miR-27b-3p;hsa-miR-513a-5p;hsa-miR-548f][hsa-miR-29c-3p;hsa-miR-513a-5p;hsa-miR-548f][hsa-miR-381;hsa-miR-548d-3p;hsa-miR-548f][hsa-miR-381;hsa-miR-548f][hsa-miR-548d-3p;hsa-miR-589-3p]
CCNB1	5	[hsa-let-7a-2-3p;hsa-miR-183-5p][hsa-let-7a-2-3p;hsa-miR-183-5p;hsa-miR-590-3p][hsa-let-7a-2-3p;hsa-miR-548j][hsa-miR-183-5p;hsa-miR-548a-5p;hsa-miR-548j][hsa-miR-548b-5p;hsa-miR-590-3p]
CCNB2	1	[hsa-miR-548d-3p;hsa-miR-548f]
CCNB3	3	[hsa-miR-10a-5p;hsa-miR-3913-5p][hsa-miR-10a-5p;hsa-miR-3913-5p;hsa-miR-548d-3p][hsa-miR-10a-5p;hsa-miR-548x-3p]
CCNC	5	[hsa-miR-133a;hsa-miR-335-3p][hsa-miR-26b-5p;hsa-miR-545-5p][hsa-miR-27b-3p;hsa-miR-323b-3p;hsa-miR-548l][hsa-miR-323b-3p;hsa-miR-548l][hsa-miR-3662;hsa-miR-508-3p]
CCND1	8	[hsa-let-7a-5p;hsa-miR-452-3p][hsa-let-7f-5p;hsa-miR-452-3p][hsa-miR-106a-5p;hsa-miR-452-3p][hsa-miR-106b-5p;hsa-miR-16-5p;hsa-miR-452-3p][hsa-miR-1269a;hsa-miR-16-5p;hsa-miR-452-3p][hsa-miR-195-5p;hsa-miR-452-3p;hsa-miR-93-5p][hsa-miR-1;hsa-miR-452-3p;hsa-miR-93-5p][hsa-miR-452-3p;hsa-miR-93-5p]
CCND2	6	[hsa-let-7c;hsa-miR-183-5p;hsa-miR-224-3p][hsa-miR-106b-5p;hsa-miR-150-5p][hsa-miR-106b-5p;hsa-miR-150-5p;hsa-miR-410][hsa-miR-150-5p;hsa-miR-708-3p][hsa-miR-183-5p;hsa-miR-92a-3p][hsa-miR-224-3p;hsa-miR-497-5p]
CCND3	6	[hsa-miR-140-3p;hsa-miR-182-5p;hsa-miR-214-3p][hsa-miR-140-3p;hsa-miR-182-5p;hsa-miR-642a-5p][hsa-miR-140-3p;hsa-miR-195-5p][hsa-miR-154-5p;hsa-miR-3200-3p;hsa-miR-642a-5p][hsa-miR-154-5p;hsa-miR-449a;hsa-miR-642a-5p][hsa-miR-154-5p;hsa-miR-642a-5p;hsa-miR-708-5p]
CCNDBP1	5	[hsa-miR-136-5p;hsa-miR-9-5p][hsa-miR-3144-3p;hsa-miR-9-5p][hsa-miR-3176;hsa-miR-570-3p][hsa-miR-3176;hsa-miR-570-3p;hsa-miR-9-5p][hsa-miR-3176;hsa-miR-9-5p]
CCNE1	6	[hsa-miR-138-5p;hsa-miR-144-3p;hsa-miR-26a-5p][hsa-miR-138-5p;hsa-miR-223-5p;hsa-miR-26a-5p][hsa-miR-138-5p;hsa-miR-26a-5p][hsa-miR-138-5p;hsa-miR-26a-5p;hsa-miR-616-5p][hsa-miR-141-5p;hsa-miR-455-3p][hsa-miR-29a-3p;hsa-miR-455-3p]
CCNE2	7	[hsa-miR-16-1-3p;hsa-miR-9-5p][hsa-miR-17-5p;hsa-miR-28-3p;hsa-miR-9-5p][hsa-miR-17-5p;hsa-miR-9-5p][hsa-miR-20b-5p;hsa-miR-30a-5p][hsa-miR-20b-5p;hsa-miR-30a-5p;hsa-miR-380-3p][hsa-miR-3162-5p;hsa-miR-3189-3p;hsa-miR-9-5p][hsa-miR-3189-3p;hsa-miR-9-5p]
CCNF	3	[hsa-miR-1294;hsa-miR-202-3p;hsa-miR-98][hsa-miR-202-3p;hsa-miR-98][hsa-miR-500a-5p;hsa-miR-98]
CCNG1	6	[hsa-miR-1304-5p;hsa-miR-590-5p][hsa-miR-21-5p;hsa-miR-27a-3p;hsa-miR-29b-2-5p][hsa-miR-21-5p;hsa-miR-29b-2-5p][hsa-miR-21-5p;hsa-miR-29b-2-5p;hsa-miR-9-5p][hsa-miR-21-5p;hsa-miR-3140-3p][hsa-miR-590-5p;hsa-miR-9-5p]
CCNG2	6	[hsa-let-7a-3p;hsa-miR-101-3p;hsa-miR-135b-5p][hsa-let-7b-3p;hsa-miR-10a-3p;hsa-miR-96-5p][hsa-let-7f-1-3p;hsa-miR-101-3p;hsa-miR-135b-5p][hsa-let-7f-1-3p;hsa-miR-135b-5p;hsa-miR-192-3p][hsa-miR-101-3p;hsa-miR-135b-5p][hsa-miR-135b-5p;hsa-miR-590-3p]
CCNI	2	[hsa-miR-4284;hsa-miR-550a-3p][hsa-miR-4284;hsa-miR-664-5p]
CCNJ	6	[hsa-let-7b-5p;hsa-miR-577][hsa-miR-17-5p;hsa-miR-29b-3p][hsa-miR-17-5p;hsa-miR-29b-3p;hsa-miR-767-3p][hsa-miR-20b-5p;hsa-miR-26b-5p;hsa-miR-92a-1-5p][hsa-miR-26b-5p;hsa-miR-449c-3p;hsa-miR-92a-1-5p][hsa-miR-26b-5p;hsa-miR-92a-1-5p]
CCNJL	6	[hsa-miR-125b-5p;hsa-miR-25-3p;hsa-miR-30a-5p][hsa-miR-125b-5p;hsa-miR-30a-5p][hsa-miR-16-5p;hsa-miR-30b-5p][hsa-miR-16-5p;hsa-miR-30b-5p;hsa-miR-30c-5p][hsa-miR-30a-5p;hsa-miR-30b-5p][hsa-miR-30a-5p;hsa-miR-30b-5p;hsa-miR-3617]
CCNK	7	[hsa-let-7g-3p;hsa-miR-30b-5p][hsa-miR-10a-5p;hsa-miR-135a-5p;hsa-miR-30a-5p][hsa-miR-10a-5p;hsa-miR-30a-5p][hsa-miR-181c-5p;hsa-miR-30b-5p][hsa-miR-30a-5p;hsa-miR-3173-3p][hsa-miR-30c-5p;hsa-miR-3652][hsa-miR-30c-5p;hsa-miR-3652;hsa-miR-589-3p]
CCNL1	7	[hsa-miR-197-3p;hsa-miR-223-5p][hsa-miR-19a-3p;hsa-miR-519a-5p][hsa-miR-19b-3p;hsa-miR-223-5p][hsa-miR-205-5p;hsa-miR-374b-5p;hsa-miR-519a-5p][hsa-miR-3187-3p;hsa-miR-519a-5p][hsa-miR-3187-3p;hsa-miR-519a-5p;hsa-miR-548j][hsa-miR-374b-5p;hsa-miR-519a-5p]
CCNL2	8	[hsa-miR-125b-2-3p;hsa-miR-200a-3p][hsa-miR-1305;hsa-miR-200a-3p][hsa-miR-148a-5p;hsa-miR-185-5p;hsa-miR-18b-5p][hsa-miR-185-5p;hsa-miR-18b-5p][hsa-miR-185-5p;hsa-miR-214-3p;hsa-miR-29a-3p][hsa-miR-185-5p;hsa-miR-29a-3p][hsa-miR-185-5p;hsa-miR-29c-3p][hsa-miR-185-5p;hsa-miR-29c-3p;hsa-miR-518b]
CCNT2	4	[hsa-let-7a-3p;hsa-miR-1304-5p;hsa-miR-7-1-3p][hsa-let-7b-3p;hsa-miR-101-3p;hsa-miR-2114-5p][hsa-let-7b-3p;hsa-miR-2114-5p][hsa-miR-183-5p;hsa-miR-29a-3p]
CCNY	5	[hsa-let-7a-5p;hsa-miR-4306;hsa-miR-9-5p][hsa-let-7a-5p;hsa-miR-9-5p][hsa-let-7f-2-3p;hsa-miR-3682-3p][hsa-let-7i-5p;hsa-miR-199b-3p;hsa-miR-3682-3p][hsa-miR-199b-3p;hsa-miR-3682-3p]
CCNYL1	7	[hsa-miR-15b-5p;hsa-miR-429;hsa-miR-508-3p][hsa-miR-217;hsa-miR-27a-3p;hsa-miR-29c-3p][hsa-miR-27a-3p;hsa-miR-29c-3p][hsa-miR-27a-3p;hsa-miR-29c-3p;hsa-miR-545-3p][hsa-miR-29c-3p;hsa-miR-33b-5p;hsa-miR-767-5p][hsa-miR-29c-3p;hsa-miR-767-5p][hsa-miR-429;hsa-miR-508-3p]
CCP110	6	[hsa-miR-124-3p;hsa-miR-520h;hsa-miR-548t-5p][hsa-miR-15b-5p;hsa-miR-520h][hsa-miR-3135a;hsa-miR-320a;hsa-miR-3651][hsa-miR-3135a;hsa-miR-3651][hsa-miR-520h;hsa-miR-548t-5p][hsa-miR-520h;hsa-miR-548t-5p;hsa-miR-9-3p]
CCPG1	7	[hsa-miR-16-1-3p;hsa-miR-30b-5p][hsa-miR-16-1-3p;hsa-miR-30b-5p;hsa-miR-374a-3p][hsa-miR-16-1-3p;hsa-miR-30b-5p;hsa-miR-887][hsa-miR-18a-5p;hsa-miR-18b-5p][hsa-miR-18a-5p;hsa-miR-18b-5p;hsa-miR-3605-5p][hsa-miR-224-5p;hsa-miR-767-3p][hsa-miR-3919;hsa-miR-767-3p]
CCR2	4	[hsa-let-7f-2-3p;hsa-miR-150-5p][hsa-let-7f-2-3p;hsa-miR-150-5p;hsa-miR-211-5p][hsa-let-7f-2-3p;hsa-miR-211-5p][hsa-miR-150-5p;hsa-miR-211-5p]
CCR3	1	[hsa-miR-296-3p;hsa-miR-543]
CCR7	1	[hsa-let-7g-5p;hsa-miR-125b-5p]
CCR9	1	[hsa-miR-130b-5p;hsa-miR-146a-5p]
CCRL1	1	[hsa-miR-1914-3p;hsa-miR-532-5p]
CCRN4L	3	[hsa-miR-1287;hsa-miR-130a-3p][hsa-miR-1287;hsa-miR-130a-3p;hsa-miR-3613-3p][hsa-miR-3613-3p;hsa-miR-454-3p;hsa-miR-670]
CCSAP	6	[hsa-let-7a-5p;hsa-miR-135b-5p;hsa-miR-23a-3p][hsa-let-7e-5p;hsa-miR-23b-3p][hsa-let-7e-5p;hsa-miR-744-3p][hsa-let-7f-5p;hsa-miR-23a-3p;hsa-miR-9-5p][hsa-let-7f-5p;hsa-miR-9-5p][hsa-miR-135b-5p;hsa-miR-23a-3p]
CCT2	5	[hsa-miR-151a-3p;hsa-miR-215][hsa-miR-151a-3p;hsa-miR-215;hsa-miR-493-3p][hsa-miR-151a-3p;hsa-miR-3688-3p;hsa-miR-493-3p][hsa-miR-151a-3p;hsa-miR-493-3p][hsa-miR-192-5p;hsa-miR-3149;hsa-miR-411-5p]
CCT3	4	[hsa-miR-105-5p;hsa-miR-138-5p;hsa-miR-18a-3p][hsa-miR-105-5p;hsa-miR-18a-3p;hsa-miR-449b-5p][hsa-miR-105-5p;hsa-miR-18a-3p;hsa-miR-93-3p][hsa-miR-223-5p;hsa-miR-320d]
CCT4	2	[hsa-miR-30c-2-3p;hsa-miR-7-5p][hsa-miR-30c-2-3p;hsa-miR-7-5p;hsa-miR-889]
CCT5	1	[hsa-miR-221-3p;hsa-miR-222-3p]
CCT6A	1	[hsa-miR-130a-3p;hsa-miR-130b-3p]
CCT6B	3	[hsa-miR-20a-3p;hsa-miR-296-3p][hsa-miR-20a-3p;hsa-miR-296-3p;hsa-miR-3667-5p][hsa-miR-20a-3p;hsa-miR-3667-5p]
CCT8	3	[hsa-miR-3173-3p;hsa-miR-32-3p][hsa-miR-3173-3p;hsa-miR-3614-3p][hsa-miR-32-3p;hsa-miR-3614-3p]
CCZ1	6	[hsa-miR-1269a;hsa-miR-186-5p;hsa-miR-224-3p][hsa-miR-1269a;hsa-miR-188-3p][hsa-miR-137;hsa-miR-145-5p][hsa-miR-143-3p;hsa-miR-188-3p][hsa-miR-143-3p;hsa-miR-188-3p;hsa-miR-23a-3p][hsa-miR-186-5p;hsa-miR-23a-3p]
CCZ1B	5	[hsa-miR-1269a;hsa-miR-30b-5p;hsa-miR-607][hsa-miR-203;hsa-miR-30b-5p;hsa-miR-607][hsa-miR-30b-5p;hsa-miR-3692-3p][hsa-miR-30b-5p;hsa-miR-3692-3p;hsa-miR-573][hsa-miR-30b-5p;hsa-miR-607]
CD160	1	[hsa-miR-3692-3p;hsa-miR-874]
CD163	5	[hsa-let-7f-2-3p;hsa-miR-141-3p][hsa-miR-141-3p;hsa-miR-142-5p][hsa-miR-141-3p;hsa-miR-214-3p][hsa-miR-142-5p;hsa-miR-195-5p][hsa-miR-142-5p;hsa-miR-195-5p;hsa-miR-214-3p]
CD164	8	[hsa-miR-1226-3p;hsa-miR-1285-3p;hsa-miR-18a-5p][hsa-miR-1285-3p;hsa-miR-18a-5p;hsa-miR-29b-2-5p][hsa-miR-1285-3p;hsa-miR-18a-5p;hsa-miR-96-5p][hsa-miR-15b-5p;hsa-miR-18a-5p;hsa-miR-514b-5p][hsa-miR-18a-5p;hsa-miR-25-5p;hsa-miR-514b-5p][hsa-miR-18a-5p;hsa-miR-508-3p;hsa-miR-514b-5p][hsa-miR-18a-5p;hsa-miR-514b-5p][hsa-miR-18a-5p;hsa-miR-514b-5p;hsa-miR-581]
CD177	1	[hsa-miR-377-5p;hsa-miR-491-5p]
CD1A	1	[hsa-miR-33a-5p;hsa-miR-33b-5p]
CD1B	1	[hsa-miR-150-3p;hsa-miR-27a-5p]
CD1D	1	[hsa-miR-142-3p;hsa-miR-577]
CD1E	4	[hsa-miR-2116-5p;hsa-miR-3150a-3p;hsa-miR-3664-5p][hsa-miR-2116-5p;hsa-miR-3664-5p][hsa-miR-2116-5p;hsa-miR-3664-5p;hsa-miR-518c-5p][hsa-miR-3664-5p;hsa-miR-491-5p;hsa-miR-518c-5p]
CD2	1	[hsa-miR-3150b-3p;hsa-miR-508-5p]
CD200	8	[hsa-miR-155-3p;hsa-miR-411-5p;hsa-miR-551b-5p][hsa-miR-155-3p;hsa-miR-411-5p;hsa-miR-592][hsa-miR-155-3p;hsa-miR-592][hsa-miR-26a-5p;hsa-miR-592][hsa-miR-26b-5p;hsa-miR-411-5p;hsa-miR-551b-5p][hsa-miR-410;hsa-miR-411-5p][hsa-miR-411-5p;hsa-miR-551b-5p][hsa-miR-411-5p;hsa-miR-551b-5p;hsa-miR-592]
CD200R1	5	[hsa-let-7c;hsa-miR-1270][hsa-let-7d-5p;hsa-miR-486-3p][hsa-let-7e-5p;hsa-miR-196a-5p;hsa-miR-486-3p][hsa-let-7i-5p;hsa-miR-486-3p][hsa-miR-196a-5p;hsa-miR-486-3p]
CD209	4	[hsa-miR-1248;hsa-miR-223-3p][hsa-miR-139-5p;hsa-miR-141-3p][hsa-miR-139-5p;hsa-miR-155-3p][hsa-miR-155-3p;hsa-miR-223-3p]
CD226	2	[hsa-miR-129-2-3p;hsa-miR-150-5p;hsa-miR-877-3p][hsa-miR-150-5p;hsa-miR-877-3p]
CD24	5	[hsa-let-7b-3p;hsa-miR-154-3p;hsa-miR-485-3p][hsa-miR-136-5p;hsa-miR-485-3p;hsa-miR-629-5p][hsa-miR-136-5p;hsa-miR-629-5p][hsa-miR-181c-5p;hsa-miR-338-5p;hsa-miR-629-5p][hsa-miR-373-3p;hsa-miR-629-5p]
CD248	5	[hsa-miR-1224-5p;hsa-miR-125a-5p;hsa-miR-380-5p][hsa-miR-1224-5p;hsa-miR-380-5p][hsa-miR-125a-5p;hsa-miR-125b-5p][hsa-miR-125b-5p;hsa-miR-380-5p][hsa-miR-125b-5p;hsa-miR-544b]
CD274	6	[hsa-miR-155-5p;hsa-miR-199a-5p][hsa-miR-155-5p;hsa-miR-199a-5p;hsa-miR-20a-5p][hsa-miR-155-5p;hsa-miR-199a-5p;hsa-miR-580][hsa-miR-155-5p;hsa-miR-519e-3p;hsa-miR-580][hsa-miR-155-5p;hsa-miR-580][hsa-miR-199a-5p;hsa-miR-3609]
CD276	1	[hsa-miR-29b-3p;hsa-miR-29c-3p]
CD28	8	[hsa-miR-30a-3p;hsa-miR-30e-3p][hsa-miR-30a-3p;hsa-miR-30e-3p;hsa-miR-3174][hsa-miR-30a-3p;hsa-miR-30e-3p;hsa-miR-3199][hsa-miR-30a-3p;hsa-miR-30e-3p;hsa-miR-337-3p][hsa-miR-30a-3p;hsa-miR-30e-3p;hsa-miR-570-3p][hsa-miR-30e-3p;hsa-miR-337-3p][hsa-miR-30e-3p;hsa-miR-520a-5p;hsa-miR-570-3p][hsa-miR-30e-3p;hsa-miR-570-3p]
CD2AP	6	[hsa-miR-182-5p;hsa-miR-187-5p][hsa-miR-195-5p;hsa-miR-374c-5p][hsa-miR-221-3p;hsa-miR-3148;hsa-miR-664-3p][hsa-miR-221-3p;hsa-miR-664-3p][hsa-miR-222-5p;hsa-miR-376b;hsa-miR-664-3p][hsa-miR-222-5p;hsa-miR-664-3p]
CD2BP2	1	[hsa-miR-3136-5p;hsa-miR-3922-3p]
CD300LG	3	[hsa-miR-181a-2-3p;hsa-miR-1827;hsa-miR-2355-3p][hsa-miR-181a-2-3p;hsa-miR-2355-3p][hsa-miR-2355-3p;hsa-miR-331-3p;hsa-miR-676-3p]
CD302	2	[hsa-miR-17-3p;hsa-miR-411-5p][hsa-miR-17-3p;hsa-miR-411-5p;hsa-miR-9-3p]
CD34	6	[hsa-miR-125a-5p;hsa-miR-33a-5p][hsa-miR-125a-5p;hsa-miR-33a-5p;hsa-miR-34c-5p][hsa-miR-125b-5p;hsa-miR-33a-5p][hsa-miR-125b-5p;hsa-miR-33a-5p;hsa-miR-34c-5p][hsa-miR-33a-5p;hsa-miR-34c-5p][hsa-miR-33a-5p;hsa-miR-34c-5p;hsa-miR-544b]
CD37	4	[hsa-miR-2355-5p;hsa-miR-296-5p;hsa-miR-361-3p][hsa-miR-2355-5p;hsa-miR-361-3p][hsa-miR-296-5p;hsa-miR-361-3p][hsa-miR-296-5p;hsa-miR-361-3p;hsa-miR-615-5p]
CD38	6	[hsa-miR-155-5p;hsa-miR-2110;hsa-miR-340-3p][hsa-miR-155-5p;hsa-miR-340-3p][hsa-miR-155-5p;hsa-miR-340-3p;hsa-miR-3619-5p][hsa-miR-155-5p;hsa-miR-340-3p;hsa-miR-767-5p][hsa-miR-155-5p;hsa-miR-3619-5p][hsa-miR-155-5p;hsa-miR-767-5p]
CD3EAP	4	[hsa-miR-1248;hsa-miR-526b-5p][hsa-miR-129-1-3p;hsa-miR-129-2-3p;hsa-miR-485-5p][hsa-miR-129-2-3p;hsa-miR-488-3p][hsa-miR-129-2-3p;hsa-miR-526b-5p]
CD4	1	[hsa-miR-148b-5p;hsa-miR-452-3p]
CD40	2	[hsa-miR-143-3p;hsa-miR-576-5p][hsa-miR-3613-5p;hsa-miR-576-5p]
CD40LG	4	[hsa-miR-126-5p;hsa-miR-140-3p][hsa-miR-140-3p;hsa-miR-194-3p][hsa-miR-140-3p;hsa-miR-340-5p][hsa-miR-140-3p;hsa-miR-34b-5p]
CD44	3	[hsa-miR-222-5p;hsa-miR-577][hsa-miR-222-5p;hsa-miR-577;hsa-miR-629-5p][hsa-miR-577;hsa-miR-629-5p]
CD46	1	[hsa-miR-103a-2-5p;hsa-miR-141-5p]
CD47	7	[hsa-miR-130b-5p;hsa-miR-376c;hsa-miR-512-3p][hsa-miR-17-5p;hsa-miR-182-5p;hsa-miR-3150b-3p][hsa-miR-182-5p;hsa-miR-194-5p][hsa-miR-182-5p;hsa-miR-3150b-3p][hsa-miR-376c;hsa-miR-512-3p][hsa-miR-512-3p;hsa-miR-944][hsa-miR-584-5p;hsa-miR-93-5p]
CD48	1	[hsa-miR-16-1-3p;hsa-miR-31-5p]
CD53	5	[hsa-miR-146a-5p;hsa-miR-197-3p][hsa-miR-146a-5p;hsa-miR-197-3p;hsa-miR-19a-5p][hsa-miR-146a-5p;hsa-miR-19b-1-5p][hsa-miR-146a-5p;hsa-miR-19b-1-5p;hsa-miR-3158-3p][hsa-miR-146a-5p;hsa-miR-3158-3p]
CD5L	1	[hsa-miR-1225-3p;hsa-miR-3166]
CD63	3	[hsa-miR-1468;hsa-miR-490-3p;hsa-miR-548d-3p][hsa-miR-1468;hsa-miR-490-3p;hsa-miR-548y][hsa-miR-490-3p;hsa-miR-548d-3p]
CD69	8	[hsa-miR-106a-5p;hsa-miR-142-5p;hsa-miR-2110][hsa-miR-106b-5p;hsa-miR-2110][hsa-miR-142-5p;hsa-miR-153][hsa-miR-142-5p;hsa-miR-18a-5p;hsa-miR-2110][hsa-miR-142-5p;hsa-miR-2110][hsa-miR-142-5p;hsa-miR-301a-3p][hsa-miR-142-5p;hsa-miR-301a-3p;hsa-miR-424-5p][hsa-miR-142-5p;hsa-miR-301a-3p;hsa-miR-519d]
CD72	2	[hsa-miR-149-5p;hsa-miR-548a-3p][hsa-miR-149-5p;hsa-miR-548e]
CD79A	5	[hsa-miR-126-5p;hsa-miR-24-3p][hsa-miR-126-5p;hsa-miR-27a-5p][hsa-miR-126-5p;hsa-miR-585;hsa-miR-590-5p][hsa-miR-126-5p;hsa-miR-590-5p][hsa-miR-1291;hsa-miR-556-3p;hsa-miR-590-5p]
CD80	5	[hsa-miR-1910;hsa-miR-22-3p][hsa-miR-2114-5p;hsa-miR-22-3p;hsa-miR-455-3p][hsa-miR-2114-5p;hsa-miR-323b-3p;hsa-miR-455-3p][hsa-miR-2114-5p;hsa-miR-455-3p][hsa-miR-323b-3p;hsa-miR-3646;hsa-miR-455-3p]
CD81	3	[hsa-miR-1237;hsa-miR-1248][hsa-miR-1237;hsa-miR-1248;hsa-miR-582-5p][hsa-miR-1237;hsa-miR-582-5p]
CD83	3	[hsa-miR-188-3p;hsa-miR-342-3p][hsa-miR-188-3p;hsa-miR-3667-5p][hsa-miR-3667-5p;hsa-miR-380-5p]
CD8A	1	[hsa-miR-142-3p;hsa-miR-146a-5p]
CD8B	1	[hsa-miR-3170;hsa-miR-3692-5p]
CD9	9	[hsa-miR-195-3p;hsa-miR-196a-3p;hsa-miR-511][hsa-miR-195-3p;hsa-miR-511][hsa-miR-195-3p;hsa-miR-511;hsa-miR-590-3p][hsa-miR-196a-3p;hsa-miR-410;hsa-miR-511][hsa-miR-196a-3p;hsa-miR-431-5p;hsa-miR-511][hsa-miR-196a-3p;hsa-miR-511][hsa-miR-33b-3p;hsa-miR-511;hsa-miR-876-5p][hsa-miR-410;hsa-miR-511][hsa-miR-511;hsa-miR-876-5p]
CD93	3	[hsa-miR-202-5p;hsa-miR-337-3p;hsa-miR-651][hsa-miR-202-5p;hsa-miR-651][hsa-miR-337-3p;hsa-miR-651]
CD96	5	[hsa-miR-146a-5p;hsa-miR-150-5p][hsa-miR-146a-5p;hsa-miR-150-5p;hsa-miR-33a-5p][hsa-miR-146a-5p;hsa-miR-33a-5p][hsa-miR-146a-5p;hsa-miR-33b-5p][hsa-miR-33a-5p;hsa-miR-33b-5p]
CDADC1	4	[hsa-miR-130a-3p;hsa-miR-3161][hsa-miR-221-5p;hsa-miR-454-3p;hsa-miR-940][hsa-miR-301b;hsa-miR-505-5p][hsa-miR-301b;hsa-miR-505-5p;hsa-miR-940]
CDC123	7	[hsa-miR-17-5p;hsa-miR-2114-5p][hsa-miR-17-5p;hsa-miR-3156-5p][hsa-miR-17-5p;hsa-miR-3156-5p;hsa-miR-361-5p][hsa-miR-17-5p;hsa-miR-3156-5p;hsa-miR-3678-3p][hsa-miR-17-5p;hsa-miR-3156-5p;hsa-miR-589-3p][hsa-miR-17-5p;hsa-miR-3680-3p;hsa-miR-589-3p][hsa-miR-17-5p;hsa-miR-589-3p]
CDC14A	6	[hsa-miR-101-3p;hsa-miR-26a-5p][hsa-miR-101-3p;hsa-miR-26a-5p;hsa-miR-449b-5p][hsa-miR-126-5p;hsa-miR-181b-5p;hsa-miR-194-5p][hsa-miR-181b-5p;hsa-miR-194-5p;hsa-miR-202-5p][hsa-miR-181b-5p;hsa-miR-194-5p;hsa-miR-34c-5p][hsa-miR-28-5p;hsa-miR-452-3p]
CDC14B	6	[hsa-let-7a-3p;hsa-let-7g-5p;hsa-miR-548e][hsa-let-7a-3p;hsa-miR-493-5p][hsa-let-7a-3p;hsa-miR-493-5p;hsa-miR-548e][hsa-miR-146a-3p;hsa-miR-218-5p;hsa-miR-577][hsa-miR-218-5p;hsa-miR-527;hsa-miR-577][hsa-miR-218-5p;hsa-miR-577]
CDC16	3	[hsa-miR-1248;hsa-miR-299-5p][hsa-miR-1248;hsa-miR-299-5p;hsa-miR-589-3p][hsa-miR-1248;hsa-miR-589-3p]
CDC20B	1	[hsa-miR-2115-3p;hsa-miR-377-5p]
CDC23	7	[hsa-miR-103a-3p;hsa-miR-16-5p][hsa-miR-103a-3p;hsa-miR-497-5p][hsa-miR-106a-5p;hsa-miR-17-5p;hsa-miR-20a-5p][hsa-miR-106b-5p;hsa-miR-17-5p;hsa-miR-20a-5p][hsa-miR-17-5p;hsa-miR-20a-5p][hsa-miR-17-5p;hsa-miR-20a-5p;hsa-miR-424-5p][hsa-miR-1914-5p;hsa-miR-20a-5p]
CDC25A	5	[hsa-let-7i-5p;hsa-miR-106b-5p;hsa-miR-20b-5p][hsa-miR-106b-5p;hsa-miR-16-5p][hsa-miR-106b-5p;hsa-miR-16-5p;hsa-miR-29a-5p][hsa-miR-106b-5p;hsa-miR-20b-5p][hsa-miR-16-5p;hsa-miR-93-5p]
CDC25B	4	[hsa-miR-1178;hsa-miR-16-5p;hsa-miR-195-5p][hsa-miR-148a-3p;hsa-miR-15a-5p;hsa-miR-2113][hsa-miR-148a-3p;hsa-miR-424-5p][hsa-miR-16-5p;hsa-miR-195-5p]
CDC26	2	[hsa-miR-1286;hsa-miR-17-3p][hsa-miR-17-3p;hsa-miR-548d-3p]
CDC27	7	[hsa-miR-105-5p;hsa-miR-3065-5p][hsa-miR-181a-5p;hsa-miR-3065-5p][hsa-miR-181a-5p;hsa-miR-3065-5p;hsa-miR-450b-5p][hsa-miR-181b-5p;hsa-miR-326][hsa-miR-29b-1-5p;hsa-miR-3065-5p;hsa-miR-450b-5p][hsa-miR-3065-5p;hsa-miR-450b-5p][hsa-miR-32-5p;hsa-miR-767-5p]
CDC34	6	[hsa-let-7a-5p;hsa-let-7c][hsa-let-7a-5p;hsa-let-7c;hsa-let-7d-5p][hsa-let-7a-5p;hsa-let-7c;hsa-let-7i-5p][hsa-let-7a-5p;hsa-let-7d-5p;hsa-let-7g-5p][hsa-let-7a-5p;hsa-let-7e-5p][hsa-let-7a-5p;hsa-let-7g-5p]
CDC37L1	7	[hsa-miR-130b-5p;hsa-miR-21-3p][hsa-miR-16-5p;hsa-miR-222-5p][hsa-miR-16-5p;hsa-miR-222-5p;hsa-miR-93-5p][hsa-miR-195-5p;hsa-miR-21-3p][hsa-miR-205-3p;hsa-miR-30a-5p][hsa-miR-205-3p;hsa-miR-30a-5p;hsa-miR-3161][hsa-miR-205-3p;hsa-miR-33a-5p]
CDC40	5	[hsa-let-7f-2-3p;hsa-miR-106a-5p;hsa-miR-3065-5p][hsa-let-7f-2-3p;hsa-miR-17-5p;hsa-miR-3065-5p][hsa-let-7f-2-3p;hsa-miR-224-3p][hsa-let-7f-2-3p;hsa-miR-3065-5p][hsa-miR-3613-3p;hsa-miR-556-5p;hsa-miR-93-5p]
CDC42	4	[hsa-miR-141-3p;hsa-miR-33a-5p][hsa-miR-18b-5p;hsa-miR-29a-3p;hsa-miR-3154][hsa-miR-200b-3p;hsa-miR-33a-5p][hsa-miR-200b-3p;hsa-miR-33a-5p;hsa-miR-421]
CDC42BPA	5	[hsa-miR-106a-5p;hsa-miR-377-3p;hsa-miR-489][hsa-miR-106a-5p;hsa-miR-424-3p;hsa-miR-489][hsa-miR-106a-5p;hsa-miR-454-3p;hsa-miR-489][hsa-miR-106a-5p;hsa-miR-489][hsa-miR-106a-5p;hsa-miR-548l]
CDC42BPB	7	[hsa-miR-200a-3p;hsa-miR-335-3p;hsa-miR-4284][hsa-miR-323a-3p;hsa-miR-548x-3p][hsa-miR-335-3p;hsa-miR-4284][hsa-miR-335-3p;hsa-miR-4284;hsa-miR-7-5p][hsa-miR-4284;hsa-miR-548e][hsa-miR-520d-5p;hsa-miR-548x-3p][hsa-miR-548b-5p;hsa-miR-548d-3p]
CDC42EP2	3	[hsa-miR-103a-3p;hsa-miR-15a-5p][hsa-miR-107;hsa-miR-25-3p][hsa-miR-15b-5p;hsa-miR-92b-3p]
CDC42EP3	6	[hsa-miR-101-3p;hsa-miR-3680-5p;hsa-miR-455-5p][hsa-miR-105-5p;hsa-miR-3680-5p;hsa-miR-455-5p][hsa-miR-144-3p;hsa-miR-455-5p][hsa-miR-1914-5p;hsa-miR-582-5p][hsa-miR-200c-5p;hsa-miR-3680-5p;hsa-miR-455-5p][hsa-miR-3680-5p;hsa-miR-455-5p]
CDC42SE1	5	[hsa-miR-125b-5p;hsa-miR-199a-3p][hsa-miR-199a-3p;hsa-miR-200b-3p;hsa-miR-627][hsa-miR-199a-3p;hsa-miR-627][hsa-miR-199b-3p;hsa-miR-214-3p][hsa-miR-214-3p;hsa-miR-660-5p]
CDC42SE2	6	[hsa-miR-103a-3p;hsa-miR-16-5p;hsa-miR-3664-5p][hsa-miR-1227;hsa-miR-503][hsa-miR-15b-5p;hsa-miR-3194-5p;hsa-miR-503][hsa-miR-15b-5p;hsa-miR-503][hsa-miR-16-5p;hsa-miR-3664-5p][hsa-miR-16-5p;hsa-miR-3664-5p;hsa-miR-656]
CDC45	1	[hsa-miR-135b-5p;hsa-miR-3653]
CDC5L	7	[hsa-miR-186-5p;hsa-miR-425-5p][hsa-miR-193b-5p;hsa-miR-27b-3p;hsa-miR-519a-5p][hsa-miR-27a-3p;hsa-miR-323a-3p;hsa-miR-519a-5p][hsa-miR-27a-3p;hsa-miR-425-5p;hsa-miR-519a-5p][hsa-miR-27a-3p;hsa-miR-519a-5p][hsa-miR-27b-3p;hsa-miR-519a-5p;hsa-miR-940][hsa-miR-519a-5p;hsa-miR-940]
CDC6	1	[hsa-miR-654-5p;hsa-miR-767-5p]
CDC7	6	[hsa-miR-1227;hsa-miR-29a-3p][hsa-miR-1227;hsa-miR-29a-3p;hsa-miR-29b-3p][hsa-miR-1227;hsa-miR-29b-3p;hsa-miR-545-5p][hsa-miR-1227;hsa-miR-3065-3p][hsa-miR-1227;hsa-miR-3065-3p;hsa-miR-545-5p][hsa-miR-1227;hsa-miR-545-5p]
CDC73	8	[hsa-miR-155-5p;hsa-miR-186-5p;hsa-miR-362-3p][hsa-miR-155-5p;hsa-miR-362-3p][hsa-miR-186-5p;hsa-miR-526b-5p;hsa-miR-664-3p][hsa-miR-186-5p;hsa-miR-664-3p][hsa-miR-29b-2-5p;hsa-miR-362-3p;hsa-miR-664-3p][hsa-miR-3161;hsa-miR-493-5p;hsa-miR-664-3p][hsa-miR-3161;hsa-miR-664-3p][hsa-miR-362-3p;hsa-miR-664-3p]
CDCA4	6	[hsa-miR-15a-5p;hsa-miR-15b-5p;hsa-miR-16-5p][hsa-miR-15b-5p;hsa-miR-16-5p][hsa-miR-15b-5p;hsa-miR-195-5p][hsa-miR-200c-3p;hsa-miR-429][hsa-miR-200c-3p;hsa-miR-429;hsa-miR-497-5p][hsa-miR-499a-5p;hsa-miR-545-3p]
CDCA7	6	[hsa-miR-103a-3p;hsa-miR-106b-5p][hsa-miR-103a-3p;hsa-miR-106b-5p;hsa-miR-323a-3p][hsa-miR-103a-3p;hsa-miR-93-5p][hsa-miR-106b-5p;hsa-miR-146a-3p;hsa-miR-940][hsa-miR-106b-5p;hsa-miR-940][hsa-miR-25-3p;hsa-miR-520a-3p]
CDCA7L	4	[hsa-miR-149-5p;hsa-miR-363-3p;hsa-miR-92a-3p][hsa-miR-218-5p;hsa-miR-760][hsa-miR-25-3p;hsa-miR-363-3p;hsa-miR-92a-3p][hsa-miR-363-3p;hsa-miR-92a-3p]
CDCA8	6	[hsa-let-7a-5p;hsa-let-7d-5p][hsa-let-7a-5p;hsa-let-7d-5p;hsa-let-7f-5p][hsa-let-7c;hsa-let-7g-5p;hsa-miR-98][hsa-let-7d-5p;hsa-let-7g-5p;hsa-let-7i-5p][hsa-let-7d-5p;hsa-let-7i-5p][hsa-let-7g-5p;hsa-miR-98]
CDH1	7	[hsa-miR-20a-3p;hsa-miR-2355-5p][hsa-miR-20a-3p;hsa-miR-2355-5p;hsa-miR-340-5p][hsa-miR-20a-3p;hsa-miR-3163;hsa-miR-616-5p][hsa-miR-20a-3p;hsa-miR-340-5p;hsa-miR-616-5p][hsa-miR-20a-3p;hsa-miR-340-5p;hsa-miR-7-1-3p][hsa-miR-20a-3p;hsa-miR-616-5p][hsa-miR-20a-3p;hsa-miR-7-1-3p]
CDH10	6	[hsa-miR-3150b-3p;hsa-miR-548x-3p][hsa-miR-320d;hsa-miR-548x-3p][hsa-miR-345-5p;hsa-miR-3927;hsa-miR-548x-3p][hsa-miR-3927;hsa-miR-489;hsa-miR-548x-3p][hsa-miR-3927;hsa-miR-493-5p;hsa-miR-548x-3p][hsa-miR-412;hsa-miR-489]
CDH11	7	[hsa-miR-101-3p;hsa-miR-18a-5p;hsa-miR-199a-5p][hsa-miR-15a-5p;hsa-miR-18a-5p][hsa-miR-18a-5p;hsa-miR-199a-5p][hsa-miR-18a-5p;hsa-miR-199a-5p;hsa-miR-935][hsa-miR-18a-5p;hsa-miR-19b-3p][hsa-miR-18a-5p;hsa-miR-3689a-5p][hsa-miR-493-5p;hsa-miR-518f-5p]
CDH12	8	[hsa-miR-103a-2-5p;hsa-miR-137][hsa-miR-103a-2-5p;hsa-miR-137;hsa-miR-3171][hsa-miR-125a-5p;hsa-miR-137;hsa-miR-205-3p][hsa-miR-137;hsa-miR-205-3p][hsa-miR-137;hsa-miR-548j][hsa-miR-28-3p;hsa-miR-548f][hsa-miR-526b-5p;hsa-miR-543;hsa-miR-548f][hsa-miR-526b-5p;hsa-miR-548f]
CDH13	6	[hsa-miR-196a-3p;hsa-miR-3200-3p;hsa-miR-548b-3p][hsa-miR-217;hsa-miR-3200-3p;hsa-miR-548b-3p][hsa-miR-30e-5p;hsa-miR-448][hsa-miR-3200-3p;hsa-miR-411-5p;hsa-miR-548b-3p][hsa-miR-3200-3p;hsa-miR-548b-3p][hsa-miR-448;hsa-miR-485-3p]
CDH17	1	[hsa-miR-3157-5p;hsa-miR-3662]
CDH18	5	[hsa-let-7c;hsa-miR-3678-5p][hsa-miR-20a-5p;hsa-miR-361-3p][hsa-miR-20a-5p;hsa-miR-361-3p;hsa-miR-548j][hsa-miR-20a-5p;hsa-miR-548j][hsa-miR-382-5p;hsa-miR-508-3p]
CDH19	5	[hsa-miR-2115-3p;hsa-miR-23a-5p;hsa-miR-3909][hsa-miR-214-5p;hsa-miR-23b-5p;hsa-miR-369-5p][hsa-miR-23a-5p;hsa-miR-23b-5p;hsa-miR-369-5p][hsa-miR-23a-5p;hsa-miR-3909][hsa-miR-23b-5p;hsa-miR-369-5p]
CDH2	4	[hsa-miR-138-5p;hsa-miR-206;hsa-miR-3074-3p][hsa-miR-138-5p;hsa-miR-216a][hsa-miR-138-5p;hsa-miR-3074-3p][hsa-miR-138-5p;hsa-miR-3074-3p;hsa-miR-3658]
CDH20	1	[hsa-miR-320b;hsa-miR-320c;hsa-miR-525-5p]
CDH22	4	[hsa-let-7a-5p;hsa-let-7c][hsa-let-7b-5p;hsa-let-7f-5p][hsa-let-7b-5p;hsa-let-7f-5p;hsa-miR-516a-5p][hsa-let-7c;hsa-miR-3925-5p]
CDH23	7	[hsa-let-7c;hsa-let-7i-5p][hsa-let-7c;hsa-let-7i-5p;hsa-miR-181b-5p][hsa-let-7c;hsa-let-7i-5p;hsa-miR-181c-5p][hsa-let-7c;hsa-let-7i-5p;hsa-miR-3614-5p][hsa-let-7c;hsa-miR-29b-2-5p][hsa-let-7i-5p;hsa-miR-181b-5p][hsa-miR-181c-5p;hsa-miR-493-3p]
CDH24	6	[hsa-miR-106a-5p;hsa-miR-10b-5p;hsa-miR-20b-3p][hsa-miR-106a-5p;hsa-miR-142-5p][hsa-miR-106a-5p;hsa-miR-142-5p;hsa-miR-20a-5p][hsa-miR-106a-5p;hsa-miR-20b-3p][hsa-miR-106a-5p;hsa-miR-20b-3p;hsa-miR-20b-5p][hsa-miR-130b-5p;hsa-miR-20a-5p;hsa-miR-93-5p]
CDH26	4	[hsa-miR-125a-5p;hsa-miR-3173-3p][hsa-miR-125a-5p;hsa-miR-3173-3p;hsa-miR-9-5p][hsa-miR-125a-5p;hsa-miR-9-5p][hsa-miR-3173-3p;hsa-miR-9-5p]
CDH3	6	[hsa-miR-2355-3p;hsa-miR-512-3p;hsa-miR-802][hsa-miR-512-3p;hsa-miR-548d-3p;hsa-miR-577][hsa-miR-512-3p;hsa-miR-577][hsa-miR-512-3p;hsa-miR-802][hsa-miR-577;hsa-miR-625-5p][hsa-miR-577;hsa-miR-802]
CDH4	8	[hsa-let-7a-2-3p;hsa-miR-1909-5p][hsa-miR-106a-5p;hsa-miR-1909-5p;hsa-miR-548d-3p][hsa-miR-17-5p;hsa-miR-1909-5p][hsa-miR-1909-5p;hsa-miR-20a-5p][hsa-miR-1909-5p;hsa-miR-33a-3p][hsa-miR-1909-5p;hsa-miR-548d-3p][hsa-miR-1909-5p;hsa-miR-93-5p][hsa-miR-196b-5p;hsa-miR-26b-3p]
CDH5	5	[hsa-miR-101-3p;hsa-miR-1226-3p][hsa-miR-1226-3p;hsa-miR-125b-5p][hsa-miR-1226-3p;hsa-miR-324-3p][hsa-miR-125a-5p;hsa-miR-502-3p][hsa-miR-144-3p;hsa-miR-501-3p]
CDH6	4	[hsa-miR-1243;hsa-miR-449b-3p][hsa-miR-142-5p;hsa-miR-28-3p;hsa-miR-539-5p][hsa-miR-142-5p;hsa-miR-539-5p][hsa-miR-323a-3p;hsa-miR-539-5p]
CDH7	3	[hsa-miR-148b-3p;hsa-miR-152;hsa-miR-454-3p][hsa-miR-148b-3p;hsa-miR-222-5p][hsa-miR-148b-3p;hsa-miR-454-3p]
CDH8	5	[hsa-miR-107;hsa-miR-23b-3p;hsa-miR-361-5p][hsa-miR-129-5p;hsa-miR-23b-3p][hsa-miR-138-5p;hsa-miR-1976;hsa-miR-421][hsa-miR-140-3p;hsa-miR-421][hsa-miR-144-5p;hsa-miR-628-5p]
CDH9	6	[hsa-miR-124-3p;hsa-miR-3920;hsa-miR-524-5p][hsa-miR-124-3p;hsa-miR-449b-5p][hsa-miR-3147;hsa-miR-524-5p][hsa-miR-3658;hsa-miR-449b-5p][hsa-miR-3920;hsa-miR-524-5p][hsa-miR-449b-5p;hsa-miR-582-3p]
CDHR1	1	[hsa-miR-19a-3p;hsa-miR-19b-3p;hsa-miR-3190-5p]
CDHR3	4	[hsa-miR-27a-5p;hsa-miR-27b-3p;hsa-miR-450b-5p][hsa-miR-27b-3p;hsa-miR-33b-5p][hsa-miR-27b-3p;hsa-miR-34a-3p;hsa-miR-450b-5p][hsa-miR-27b-3p;hsa-miR-450b-5p;hsa-miR-513a-5p]
CDK1	7	[hsa-miR-10a-3p;hsa-miR-16-2-3p][hsa-miR-10a-3p;hsa-miR-16-2-3p;hsa-miR-181b-5p][hsa-miR-10a-3p;hsa-miR-22-5p][hsa-miR-1271-5p;hsa-miR-548f][hsa-miR-181d;hsa-miR-195-3p;hsa-miR-548f][hsa-miR-181d;hsa-miR-548f][hsa-miR-3161;hsa-miR-548f]
CDK12	6	[hsa-miR-2114-3p;hsa-miR-873-5p;hsa-miR-874][hsa-miR-224-5p;hsa-miR-873-5p;hsa-miR-874][hsa-miR-30a-5p;hsa-miR-3157-5p;hsa-miR-873-5p][hsa-miR-30a-5p;hsa-miR-3662;hsa-miR-421][hsa-miR-495;hsa-miR-873-5p][hsa-miR-873-5p;hsa-miR-874]
CDK13	6	[hsa-miR-190b;hsa-miR-429][hsa-miR-190b;hsa-miR-508-3p;hsa-miR-9-5p][hsa-miR-190b;hsa-miR-550a-5p;hsa-miR-9-5p][hsa-miR-190b;hsa-miR-9-5p][hsa-miR-200b-3p;hsa-miR-550a-5p][hsa-miR-410;hsa-miR-550a-5p]
CDK14	7	[hsa-let-7f-5p;hsa-miR-222-3p;hsa-miR-30e-5p][hsa-miR-199a-5p;hsa-miR-30e-5p][hsa-miR-199b-5p;hsa-miR-98][hsa-miR-19b-3p;hsa-miR-27a-3p;hsa-miR-30e-5p][hsa-miR-222-3p;hsa-miR-30e-5p][hsa-miR-30a-5p;hsa-miR-30e-5p][hsa-miR-30b-5p;hsa-miR-98]
CDK16	7	[hsa-miR-135b-3p;hsa-miR-32-5p][hsa-miR-2116-5p;hsa-miR-25-3p;hsa-miR-29c-3p][hsa-miR-25-3p;hsa-miR-29c-3p][hsa-miR-25-3p;hsa-miR-29c-3p;hsa-miR-30b-3p][hsa-miR-25-3p;hsa-miR-29c-3p;hsa-miR-33a-5p][hsa-miR-29b-3p;hsa-miR-32-5p][hsa-miR-29c-3p;hsa-miR-3914]
CDK17	7	[hsa-miR-148a-5p;hsa-miR-330-5p][hsa-miR-148a-5p;hsa-miR-3662;hsa-miR-369-3p][hsa-miR-148a-5p;hsa-miR-369-3p][hsa-miR-18a-5p;hsa-miR-195-5p;hsa-miR-22-3p][hsa-miR-18a-5p;hsa-miR-22-3p][hsa-miR-18a-5p;hsa-miR-22-3p;hsa-miR-3152-3p][hsa-miR-18a-5p;hsa-miR-23b-3p]
CDK18	4	[hsa-miR-183-3p;hsa-miR-27a-3p;hsa-miR-493-5p][hsa-miR-27a-3p;hsa-miR-27b-3p;hsa-miR-338-5p][hsa-miR-27a-3p;hsa-miR-27b-3p;hsa-miR-493-5p][hsa-miR-27a-3p;hsa-miR-493-5p]
CDK19	8	[hsa-miR-148b-3p;hsa-miR-454-3p;hsa-miR-577][hsa-miR-181b-5p;hsa-miR-512-3p;hsa-miR-577][hsa-miR-218-1-3p;hsa-miR-577][hsa-miR-331-5p;hsa-miR-512-3p;hsa-miR-577][hsa-miR-34a-5p;hsa-miR-512-3p;hsa-miR-577][hsa-miR-3662;hsa-miR-577][hsa-miR-454-3p;hsa-miR-512-3p;hsa-miR-577][hsa-miR-454-3p;hsa-miR-577]
CDK2	5	[hsa-miR-1179;hsa-miR-301a-3p][hsa-miR-1179;hsa-miR-301a-3p;hsa-miR-556-5p][hsa-miR-186-5p;hsa-miR-20a-3p;hsa-miR-26b-5p][hsa-miR-20a-3p;hsa-miR-26b-5p;hsa-miR-429][hsa-miR-26b-5p;hsa-miR-429]
CDK20	4	[hsa-miR-224-5p;hsa-miR-335-5p][hsa-miR-224-5p;hsa-miR-335-5p;hsa-miR-3921][hsa-miR-224-5p;hsa-miR-3921][hsa-miR-224-5p;hsa-miR-421]
CDK2AP1	5	[hsa-miR-105-5p;hsa-miR-130b-5p][hsa-miR-106a-5p;hsa-miR-18b-5p][hsa-miR-127-5p;hsa-miR-132-3p;hsa-miR-519a-5p][hsa-miR-132-3p;hsa-miR-519a-5p][hsa-miR-138-1-3p;hsa-miR-519a-5p]
CDK2AP2	6	[hsa-miR-1197;hsa-miR-130a-3p;hsa-miR-182-5p][hsa-miR-130a-3p;hsa-miR-24-3p;hsa-miR-641][hsa-miR-182-5p;hsa-miR-454-3p][hsa-miR-182-5p;hsa-miR-641][hsa-miR-18a-5p;hsa-miR-24-3p;hsa-miR-641][hsa-miR-24-3p;hsa-miR-641]
CDK3	3	[hsa-miR-214-3p;hsa-miR-605][hsa-miR-3929;hsa-miR-503;hsa-miR-605][hsa-miR-503;hsa-miR-605]
CDK4	5	[hsa-miR-1304-5p;hsa-miR-340-5p][hsa-miR-1304-5p;hsa-miR-340-5p;hsa-miR-548j][hsa-miR-19b-1-5p;hsa-miR-548y][hsa-miR-340-5p;hsa-miR-34b-5p;hsa-miR-9-5p][hsa-miR-340-5p;hsa-miR-9-5p]
CDK5	5	[hsa-miR-106b-3p;hsa-miR-151a-5p][hsa-miR-106b-3p;hsa-miR-4254][hsa-miR-28-5p;hsa-miR-708-5p][hsa-miR-30c-2-3p;hsa-miR-708-5p][hsa-miR-370;hsa-miR-708-5p]
CDK5R1	7	[hsa-miR-129-1-3p;hsa-miR-15a-5p][hsa-miR-129-1-3p;hsa-miR-338-5p][hsa-miR-148a-5p;hsa-miR-3680-5p][hsa-miR-186-5p;hsa-miR-363-3p][hsa-miR-217;hsa-miR-363-3p][hsa-miR-3202;hsa-miR-363-3p][hsa-miR-363-3p;hsa-miR-466]
CDK5R2	6	[hsa-miR-1271-5p;hsa-miR-338-3p;hsa-miR-3917][hsa-miR-195-5p;hsa-miR-338-3p;hsa-miR-3917][hsa-miR-3065-3p;hsa-miR-338-3p;hsa-miR-3917][hsa-miR-338-3p;hsa-miR-3917][hsa-miR-338-3p;hsa-miR-3917;hsa-miR-411-3p][hsa-miR-338-3p;hsa-miR-3917;hsa-miR-627]
CDK5RAP2	1	[hsa-miR-3614-5p;hsa-miR-3914]
CDK5RAP3	1	[hsa-miR-296-5p;hsa-miR-3925-5p]
CDK6	8	[hsa-let-7f-1-3p;hsa-miR-10a-5p;hsa-miR-135b-3p][hsa-let-7f-1-3p;hsa-miR-135b-3p][hsa-let-7f-1-3p;hsa-miR-135b-3p;hsa-miR-34b-5p][hsa-miR-10a-5p;hsa-miR-135b-3p][hsa-miR-10b-5p;hsa-miR-135b-3p;hsa-miR-20a-5p][hsa-miR-135b-3p;hsa-miR-20a-5p][hsa-miR-135b-3p;hsa-miR-20a-5p;hsa-miR-34c-5p][hsa-miR-135b-3p;hsa-miR-29a-3p]
CDK7	6	[hsa-miR-199a-3p;hsa-miR-222-5p;hsa-miR-642a-5p][hsa-miR-199b-3p;hsa-miR-222-5p;hsa-miR-524-5p][hsa-miR-199b-3p;hsa-miR-222-5p;hsa-miR-642a-5p][hsa-miR-222-5p;hsa-miR-3129-5p;hsa-miR-642a-5p][hsa-miR-222-5p;hsa-miR-642a-5p][hsa-miR-3129-5p;hsa-miR-33a-3p]
CDK8	6	[hsa-let-7b-5p;hsa-miR-150-3p][hsa-let-7b-5p;hsa-miR-152][hsa-let-7b-5p;hsa-miR-152;hsa-miR-98][hsa-let-7b-5p;hsa-miR-181d][hsa-miR-1267;hsa-miR-17-5p][hsa-miR-17-5p;hsa-miR-26b-5p]
CDK9	1	[hsa-miR-224-5p;hsa-miR-888-5p]
CDKAL1	1	[hsa-miR-494;hsa-miR-93-3p]
CDKL2	2	[hsa-miR-103a-3p;hsa-miR-107;hsa-miR-181b-5p][hsa-miR-181a-5p;hsa-miR-181c-5p]
CDKN1A	7	[hsa-miR-106b-5p;hsa-miR-20a-5p;hsa-miR-500a-3p][hsa-miR-106b-5p;hsa-miR-24-2-5p][hsa-miR-106b-5p;hsa-miR-454-3p][hsa-miR-106b-5p;hsa-miR-454-3p;hsa-miR-500a-3p][hsa-miR-106b-5p;hsa-miR-455-3p;hsa-miR-500a-3p][hsa-miR-106b-5p;hsa-miR-500a-3p][hsa-miR-106b-5p;hsa-miR-93-5p]
CDKN1B	9	[hsa-let-7f-1-3p;hsa-miR-452-5p;hsa-miR-590-3p][hsa-miR-103a-3p;hsa-miR-141-5p;hsa-miR-452-5p][hsa-miR-141-5p;hsa-miR-152;hsa-miR-452-5p][hsa-miR-141-5p;hsa-miR-181a-5p;hsa-miR-452-5p][hsa-miR-141-5p;hsa-miR-452-5p][hsa-miR-141-5p;hsa-miR-452-5p;hsa-miR-488-3p][hsa-miR-155-5p;hsa-miR-452-5p;hsa-miR-590-3p][hsa-miR-2355-5p;hsa-miR-452-5p;hsa-miR-590-3p][hsa-miR-452-5p;hsa-miR-590-3p]
CDKN1C	5	[hsa-let-7a-2-3p;hsa-let-7c;hsa-miR-1271-5p][hsa-let-7c;hsa-miR-486-3p][hsa-miR-204-5p;hsa-miR-33b-3p;hsa-miR-34a-5p][hsa-miR-33b-3p;hsa-miR-34a-5p;hsa-miR-519e-3p][hsa-miR-493-5p;hsa-miR-9-3p]
CDKN2A	6	[hsa-miR-1234;hsa-miR-455-3p][hsa-miR-15b-5p;hsa-miR-18a-3p;hsa-miR-3065-3p][hsa-miR-18a-3p;hsa-miR-3065-3p][hsa-miR-18a-3p;hsa-miR-3065-3p;hsa-miR-940][hsa-miR-18a-3p;hsa-miR-455-3p][hsa-miR-18a-3p;hsa-miR-500a-3p]
CDKN2AIP	4	[hsa-let-7b-3p;hsa-miR-126-3p][hsa-let-7b-3p;hsa-miR-196a-3p][hsa-miR-105-5p;hsa-miR-28-3p][hsa-miR-130b-3p;hsa-miR-615-5p]
CDKN2B	5	[hsa-miR-1283;hsa-miR-195-5p][hsa-miR-136-5p;hsa-miR-15a-5p;hsa-miR-21-3p][hsa-miR-15a-5p;hsa-miR-21-3p][hsa-miR-15a-5p;hsa-miR-3065-3p][hsa-miR-15a-5p;hsa-miR-3065-3p;hsa-miR-429]
CDKN2C	8	[hsa-miR-19b-1-5p;hsa-miR-450b-5p;hsa-miR-7-2-3p][hsa-miR-450b-5p;hsa-miR-520g;hsa-miR-7-2-3p][hsa-miR-450b-5p;hsa-miR-548d-3p;hsa-miR-7-2-3p][hsa-miR-450b-5p;hsa-miR-7-2-3p][hsa-miR-503;hsa-miR-577;hsa-miR-7-2-3p][hsa-miR-577;hsa-miR-664-3p][hsa-miR-577;hsa-miR-7-1-3p][hsa-miR-577;hsa-miR-7-2-3p]
CDKN2D	5	[hsa-miR-129-1-3p;hsa-miR-191-5p;hsa-miR-548d-3p][hsa-miR-129-1-3p;hsa-miR-493-5p][hsa-miR-129-1-3p;hsa-miR-548d-3p][hsa-miR-15b-5p;hsa-miR-32-3p;hsa-miR-944][hsa-miR-493-5p;hsa-miR-548d-3p]
CDKN3	4	[hsa-miR-141-3p;hsa-miR-181a-5p][hsa-miR-141-3p;hsa-miR-181a-5p;hsa-miR-181b-5p][hsa-miR-181b-5p;hsa-miR-200a-3p;hsa-miR-3130-3p][hsa-miR-181b-5p;hsa-miR-3130-3p]
CDO1	6	[hsa-miR-1243;hsa-miR-195-3p][hsa-miR-1243;hsa-miR-195-3p;hsa-miR-19b-2-5p][hsa-miR-1243;hsa-miR-19b-1-5p][hsa-miR-16-2-3p;hsa-miR-323b-3p][hsa-miR-19b-1-5p;hsa-miR-29b-2-5p;hsa-miR-548b-5p][hsa-miR-29b-2-5p;hsa-miR-548a-5p;hsa-miR-548b-5p]
CDON	7	[hsa-miR-130b-5p;hsa-miR-141-3p;hsa-miR-2355-3p][hsa-miR-130b-5p;hsa-miR-195-3p][hsa-miR-130b-5p;hsa-miR-195-3p;hsa-miR-340-5p][hsa-miR-130b-5p;hsa-miR-195-3p;hsa-miR-455-3p][hsa-miR-130b-5p;hsa-miR-195-3p;hsa-miR-582-5p][hsa-miR-141-3p;hsa-miR-2355-3p][hsa-miR-141-3p;hsa-miR-2355-3p;hsa-miR-381]
CDR1	1	[hsa-miR-19b-1-5p;hsa-miR-338-3p]
CDR2	7	[hsa-let-7a-3p;hsa-miR-200b-3p][hsa-let-7a-3p;hsa-miR-200b-3p;hsa-miR-223-3p][hsa-let-7a-3p;hsa-miR-429][hsa-let-7f-1-3p;hsa-miR-144-3p;hsa-miR-200c-3p][hsa-let-7f-1-3p;hsa-miR-200c-3p][hsa-let-7f-1-3p;hsa-miR-200c-3p;hsa-miR-27a-3p][hsa-miR-144-3p;hsa-miR-200c-3p;hsa-miR-27a-3p]
CDR2L	6	[hsa-miR-135a-5p;hsa-miR-135b-5p;hsa-miR-186-5p][hsa-miR-135a-5p;hsa-miR-135b-5p;hsa-miR-216b][hsa-miR-135a-5p;hsa-miR-135b-5p;hsa-miR-429][hsa-miR-135a-5p;hsa-miR-135b-5p;hsa-miR-4306][hsa-miR-135a-5p;hsa-miR-26a-5p;hsa-miR-26b-5p][hsa-miR-186-5p;hsa-miR-429]
CDRT1	2	[hsa-miR-185-3p;hsa-miR-34a-5p][hsa-miR-185-3p;hsa-miR-421;hsa-miR-449c-3p]
CDS1	7	[hsa-miR-1248;hsa-miR-181c-5p;hsa-miR-205-3p][hsa-miR-146b-5p;hsa-miR-19a-3p][hsa-miR-146b-5p;hsa-miR-19a-3p;hsa-miR-494][hsa-miR-181c-5p;hsa-miR-181d;hsa-miR-205-3p][hsa-miR-181c-5p;hsa-miR-205-3p][hsa-miR-19a-3p;hsa-miR-335-3p][hsa-miR-301a-3p;hsa-miR-493-5p]
CDS2	6	[hsa-let-7f-2-3p;hsa-miR-125b-5p;hsa-miR-224-5p][hsa-miR-125b-5p;hsa-miR-195-5p;hsa-miR-224-5p][hsa-miR-125b-5p;hsa-miR-214-3p;hsa-miR-224-5p][hsa-miR-125b-5p;hsa-miR-217;hsa-miR-224-5p][hsa-miR-125b-5p;hsa-miR-224-5p;hsa-miR-320d][hsa-miR-125b-5p;hsa-miR-224-5p;hsa-miR-497-5p]
CDV3	6	[hsa-miR-107;hsa-miR-16-5p][hsa-miR-16-5p;hsa-miR-2114-3p][hsa-miR-17-3p;hsa-miR-29b-1-5p][hsa-miR-203;hsa-miR-29b-1-5p;hsa-miR-3662][hsa-miR-2115-3p;hsa-miR-29b-1-5p][hsa-miR-29b-1-5p;hsa-miR-301a-3p;hsa-miR-3662]
CDX1	3	[hsa-miR-127-5p;hsa-miR-155-5p;hsa-miR-18a-5p][hsa-miR-127-5p;hsa-miR-18a-5p][hsa-miR-155-5p;hsa-miR-18a-5p]
CDX2	8	[hsa-miR-181d;hsa-miR-3155a;hsa-miR-589-3p][hsa-miR-182-5p;hsa-miR-3155a][hsa-miR-182-5p;hsa-miR-3155a;hsa-miR-3611][hsa-miR-3155a;hsa-miR-326;hsa-miR-518b][hsa-miR-3155a;hsa-miR-326;hsa-miR-9-5p][hsa-miR-3155a;hsa-miR-505-5p][hsa-miR-3155a;hsa-miR-505-5p;hsa-miR-548q][hsa-miR-3155a;hsa-miR-589-3p]
CDYL	8	[hsa-let-7a-2-3p;hsa-miR-3200-5p][hsa-miR-141-3p;hsa-miR-17-5p;hsa-miR-27b-3p][hsa-miR-144-3p;hsa-miR-17-5p;hsa-miR-29b-1-5p][hsa-miR-17-5p;hsa-miR-200c-3p;hsa-miR-27b-3p][hsa-miR-17-5p;hsa-miR-27b-3p][hsa-miR-17-5p;hsa-miR-27b-3p;hsa-miR-455-3p][hsa-miR-17-5p;hsa-miR-29b-1-5p][hsa-miR-17-5p;hsa-miR-30d-3p]
CDYL2	7	[hsa-miR-1269a;hsa-miR-338-5p][hsa-miR-18a-5p;hsa-miR-450b-5p;hsa-miR-7-1-3p][hsa-miR-18a-5p;hsa-miR-7-1-3p][hsa-miR-206;hsa-miR-338-5p][hsa-miR-206;hsa-miR-338-5p;hsa-miR-892a][hsa-miR-338-5p;hsa-miR-4254][hsa-miR-338-5p;hsa-miR-4254;hsa-miR-615-3p]
CEACAM1	1	[hsa-miR-340-5p;hsa-miR-548d-3p]
CEACAM5	7	[hsa-miR-105-5p;hsa-miR-148a-3p;hsa-miR-362-5p][hsa-miR-105-5p;hsa-miR-151a-3p][hsa-miR-148a-3p;hsa-miR-151a-3p;hsa-miR-362-5p][hsa-miR-148a-3p;hsa-miR-152;hsa-miR-362-5p][hsa-miR-148a-3p;hsa-miR-3607-3p;hsa-miR-362-5p][hsa-miR-148a-3p;hsa-miR-362-5p][hsa-miR-148a-3p;hsa-miR-362-5p;hsa-miR-590-3p]
CEACAM6	1	[hsa-miR-338-3p;hsa-miR-766-3p]
CEBPA	7	[hsa-miR-100-3p;hsa-miR-369-3p;hsa-miR-96-5p][hsa-miR-100-3p;hsa-miR-96-5p][hsa-miR-190a;hsa-miR-224-3p;hsa-miR-32-5p][hsa-miR-190b;hsa-miR-224-3p][hsa-miR-224-3p;hsa-miR-374c-5p][hsa-miR-224-3p;hsa-miR-374c-5p;hsa-miR-548d-3p][hsa-miR-656;hsa-miR-96-5p]
CEBPB	7	[hsa-let-7e-3p;hsa-miR-1266;hsa-miR-452-3p][hsa-miR-106b-5p;hsa-miR-1276][hsa-miR-1266;hsa-miR-374b-5p;hsa-miR-452-3p][hsa-miR-1266;hsa-miR-452-3p][hsa-miR-142-3p;hsa-miR-452-3p][hsa-miR-452-3p;hsa-miR-455-3p][hsa-miR-577;hsa-miR-603]
CEBPD	6	[hsa-miR-1238;hsa-miR-429;hsa-miR-455-5p][hsa-miR-200b-3p;hsa-miR-429;hsa-miR-455-5p][hsa-miR-22-3p;hsa-miR-429;hsa-miR-548t-5p][hsa-miR-3607-3p;hsa-miR-429][hsa-miR-3607-3p;hsa-miR-429;hsa-miR-455-5p][hsa-miR-429;hsa-miR-548t-5p]
CEBPE	1	[hsa-miR-301b;hsa-miR-3157-5p]
CEBPG	6	[hsa-miR-30c-2-3p;hsa-miR-3161;hsa-miR-873-5p][hsa-miR-3140-3p;hsa-miR-32-3p;hsa-miR-9-3p][hsa-miR-3140-3p;hsa-miR-9-3p][hsa-miR-3161;hsa-miR-374a-5p;hsa-miR-873-5p][hsa-miR-3161;hsa-miR-873-5p][hsa-miR-32-3p;hsa-miR-9-3p]
CEBPZ	4	[hsa-miR-181a-2-3p;hsa-miR-19b-3p;hsa-miR-2115-3p][hsa-miR-19a-3p;hsa-miR-206;hsa-miR-7-2-3p][hsa-miR-19a-3p;hsa-miR-380-5p;hsa-miR-7-2-3p][hsa-miR-19a-3p;hsa-miR-7-2-3p]
CECR2	8	[hsa-miR-125b-5p;hsa-miR-3607-3p][hsa-miR-181c-5p;hsa-miR-2114-5p][hsa-miR-181c-5p;hsa-miR-2114-5p;hsa-miR-30a-5p][hsa-miR-181c-5p;hsa-miR-22-3p;hsa-miR-320d][hsa-miR-181c-5p;hsa-miR-3065-5p;hsa-miR-320d][hsa-miR-181c-5p;hsa-miR-30b-5p;hsa-miR-320d][hsa-miR-181c-5p;hsa-miR-320d][hsa-miR-3607-3p;hsa-miR-508-5p]
CECR6	5	[hsa-let-7b-5p;hsa-miR-15b-5p;hsa-miR-16-5p][hsa-miR-10b-5p;hsa-miR-195-5p;hsa-miR-98][hsa-miR-16-5p;hsa-miR-424-5p][hsa-miR-195-5p;hsa-miR-98][hsa-miR-3919;hsa-miR-513c-5p;hsa-miR-98]
CELF1	7	[hsa-miR-135b-5p;hsa-miR-148a-5p][hsa-miR-214-3p;hsa-miR-3156-5p][hsa-miR-214-3p;hsa-miR-3156-5p;hsa-miR-362-3p][hsa-miR-214-3p;hsa-miR-33b-5p][hsa-miR-214-3p;hsa-miR-33b-5p;hsa-miR-3913-5p][hsa-miR-214-3p;hsa-miR-362-3p][hsa-miR-214-3p;hsa-miR-7-5p]
CELF2	7	[hsa-miR-1224-5p;hsa-miR-140-3p][hsa-miR-140-3p;hsa-miR-3662][hsa-miR-142-3p;hsa-miR-27b-3p][hsa-miR-142-3p;hsa-miR-33a-5p][hsa-miR-142-3p;hsa-miR-431-5p][hsa-miR-200c-3p;hsa-miR-33a-5p][hsa-miR-26b-5p;hsa-miR-33a-5p]
CELF3	8	[hsa-miR-146a-5p;hsa-miR-146b-5p][hsa-miR-146a-5p;hsa-miR-146b-5p;hsa-miR-150-5p][hsa-miR-146a-5p;hsa-miR-146b-5p;hsa-miR-30d-5p][hsa-miR-146a-5p;hsa-miR-146b-5p;hsa-miR-34a-5p][hsa-miR-146a-5p;hsa-miR-146b-5p;hsa-miR-383][hsa-miR-146b-5p;hsa-miR-30d-5p;hsa-miR-548y][hsa-miR-146b-5p;hsa-miR-383][hsa-miR-146b-5p;hsa-miR-548y]
CELF4	7	[hsa-miR-133a;hsa-miR-556-3p;hsa-miR-9-5p][hsa-miR-147a;hsa-miR-9-5p][hsa-miR-19b-3p;hsa-miR-342-3p;hsa-miR-9-5p][hsa-miR-330-3p;hsa-miR-490-3p][hsa-miR-342-3p;hsa-miR-9-5p][hsa-miR-34c-5p;hsa-miR-490-3p;hsa-miR-503][hsa-miR-556-3p;hsa-miR-9-5p]
CELF5	7	[hsa-let-7a-2-3p;hsa-miR-30b-5p;hsa-miR-9-5p][hsa-miR-1229;hsa-miR-28-3p;hsa-miR-30b-5p][hsa-miR-224-3p;hsa-miR-30b-5p;hsa-miR-9-5p][hsa-miR-28-3p;hsa-miR-30b-5p][hsa-miR-28-3p;hsa-miR-30b-5p;hsa-miR-548l][hsa-miR-30b-5p;hsa-miR-30d-5p;hsa-miR-9-5p][hsa-miR-30b-5p;hsa-miR-9-5p]
CELF6	7	[hsa-miR-10a-5p;hsa-miR-190a;hsa-miR-190b][hsa-miR-10a-5p;hsa-miR-190b][hsa-miR-10a-5p;hsa-miR-190b;hsa-miR-9-5p][hsa-miR-141-3p;hsa-miR-153][hsa-miR-204-5p;hsa-miR-2355-3p;hsa-miR-29c-3p][hsa-miR-204-5p;hsa-miR-29c-3p][hsa-miR-204-5p;hsa-miR-29c-3p;hsa-miR-9-5p]
CELSR1	3	[hsa-miR-199b-5p;hsa-miR-32-3p][hsa-miR-199b-5p;hsa-miR-32-3p;hsa-miR-96-5p][hsa-miR-19a-5p;hsa-miR-2116-3p]
CELSR2	9	[hsa-miR-129-5p;hsa-miR-214-3p;hsa-miR-3150b-3p][hsa-miR-129-5p;hsa-miR-3150b-3p][hsa-miR-199b-3p;hsa-miR-3150b-3p;hsa-miR-501-5p][hsa-miR-20b-5p;hsa-miR-3129-5p;hsa-miR-3150b-3p][hsa-miR-20b-5p;hsa-miR-3150b-3p][hsa-miR-20b-5p;hsa-miR-3150b-3p;hsa-miR-96-5p][hsa-miR-3150b-3p;hsa-miR-3662;hsa-miR-501-5p][hsa-miR-3150b-3p;hsa-miR-501-5p][hsa-miR-3150b-3p;hsa-miR-618]
CELSR3	7	[hsa-miR-132-3p;hsa-miR-30a-5p;hsa-miR-34b-5p][hsa-miR-183-5p;hsa-miR-30a-5p;hsa-miR-34b-5p][hsa-miR-30a-5p;hsa-miR-30c-5p;hsa-miR-34b-5p][hsa-miR-30a-5p;hsa-miR-34b-5p][hsa-miR-30a-5p;hsa-miR-34b-5p;hsa-miR-449c-5p][hsa-miR-30a-5p;hsa-miR-34b-5p;hsa-miR-455-3p][hsa-miR-30a-5p;hsa-miR-34b-5p;hsa-miR-7-1-3p]
CEND1	2	[hsa-miR-32-5p;hsa-miR-33a-5p;hsa-miR-33b-5p][hsa-miR-33a-5p;hsa-miR-33b-5p;hsa-miR-363-3p]
CENPB	7	[hsa-miR-1249;hsa-miR-203;hsa-miR-30c-2-3p][hsa-miR-1249;hsa-miR-30c-2-3p][hsa-miR-135a-5p;hsa-miR-181a-2-3p][hsa-miR-135b-5p;hsa-miR-181a-2-3p][hsa-miR-135b-5p;hsa-miR-181a-2-3p;hsa-miR-296-5p][hsa-miR-135b-5p;hsa-miR-181a-2-3p;hsa-miR-875-3p][hsa-miR-135b-5p;hsa-miR-181a-2-3p;hsa-miR-892a]
CENPBD1	6	[hsa-miR-15b-5p;hsa-miR-195-5p][hsa-miR-15b-5p;hsa-miR-195-5p;hsa-miR-2355-5p][hsa-miR-16-5p;hsa-miR-195-5p;hsa-miR-2355-5p][hsa-miR-16-5p;hsa-miR-2355-5p][hsa-miR-195-5p;hsa-miR-2355-5p][hsa-miR-2355-5p;hsa-miR-424-5p]
CENPH	1	[hsa-miR-105-5p;hsa-miR-1285-3p]
CENPJ	1	[hsa-miR-223-3p;hsa-miR-524-5p]
CENPK	5	[hsa-miR-1226-3p;hsa-miR-3146][hsa-miR-1226-3p;hsa-miR-892a][hsa-miR-3607-3p;hsa-miR-362-5p][hsa-miR-362-5p;hsa-miR-500b;hsa-miR-7-1-3p][hsa-miR-362-5p;hsa-miR-7-1-3p]
CENPM	2	[hsa-miR-107;hsa-miR-3619-5p][hsa-miR-214-3p;hsa-miR-3619-5p]
CENPO	6	[hsa-miR-130a-3p;hsa-miR-22-5p;hsa-miR-520a-5p][hsa-miR-130b-3p;hsa-miR-20b-5p][hsa-miR-130b-3p;hsa-miR-301a-3p][hsa-miR-130b-3p;hsa-miR-301a-3p;hsa-miR-541-3p][hsa-miR-17-5p;hsa-miR-93-5p][hsa-miR-3622a-3p;hsa-miR-93-5p]
CENPP	4	[hsa-let-7a-2-3p;hsa-miR-29b-2-5p;hsa-miR-30a-3p][hsa-let-7a-2-3p;hsa-miR-30a-3p;hsa-miR-3662][hsa-miR-29b-2-5p;hsa-miR-30a-3p][hsa-miR-335-3p;hsa-miR-493-5p;hsa-miR-628-5p]
CENPV	8	[hsa-miR-1276;hsa-miR-154-3p][hsa-miR-1276;hsa-miR-154-3p;hsa-miR-342-3p][hsa-miR-1276;hsa-miR-154-3p;hsa-miR-377-3p][hsa-miR-1276;hsa-miR-154-3p;hsa-miR-487a][hsa-miR-1276;hsa-miR-377-3p][hsa-miR-1276;hsa-miR-99a-3p][hsa-miR-154-3p;hsa-miR-22-3p][hsa-miR-154-3p;hsa-miR-22-3p;hsa-miR-342-3p]
CEP112	4	[hsa-miR-128;hsa-miR-3166;hsa-miR-342-3p][hsa-miR-128;hsa-miR-342-3p][hsa-miR-140-3p;hsa-miR-27a-3p][hsa-miR-27a-3p;hsa-miR-338-5p]
CEP120	6	[hsa-let-7e-5p;hsa-miR-130b-3p;hsa-miR-24-3p][hsa-let-7e-5p;hsa-miR-454-3p;hsa-miR-98][hsa-let-7i-5p;hsa-miR-454-3p][hsa-miR-106a-5p;hsa-miR-1251][hsa-miR-130b-3p;hsa-miR-24-3p][hsa-miR-454-3p;hsa-miR-98]
CEP128	5	[hsa-miR-106b-5p;hsa-miR-302b-3p;hsa-miR-93-5p][hsa-miR-106b-5p;hsa-miR-32-3p;hsa-miR-93-5p][hsa-miR-106b-5p;hsa-miR-93-5p][hsa-miR-125a-5p;hsa-miR-125b-5p][hsa-miR-874;hsa-miR-93-5p]
CEP135	4	[hsa-let-7b-5p;hsa-miR-144-3p;hsa-miR-592][hsa-let-7b-5p;hsa-miR-592][hsa-let-7i-5p;hsa-miR-22-5p;hsa-miR-513a-5p][hsa-miR-22-5p;hsa-miR-377-3p;hsa-miR-513a-5p]
CEP152	3	[hsa-miR-124-3p;hsa-miR-141-3p;hsa-miR-9-3p][hsa-miR-124-3p;hsa-miR-3910;hsa-miR-9-3p][hsa-miR-200a-3p;hsa-miR-514b-5p;hsa-miR-9-3p]
CEP164	6	[hsa-let-7e-5p;hsa-miR-3929][hsa-let-7e-5p;hsa-miR-3929;hsa-miR-98][hsa-let-7e-5p;hsa-miR-98][hsa-let-7f-5p;hsa-miR-3929;hsa-miR-98][hsa-let-7f-5p;hsa-miR-98][hsa-miR-3929;hsa-miR-98]
CEP170	6	[hsa-let-7a-2-3p;hsa-miR-200a-5p][hsa-let-7a-2-3p;hsa-miR-802][hsa-miR-101-3p;hsa-miR-520a-5p;hsa-miR-934][hsa-miR-105-5p;hsa-miR-106b-5p][hsa-miR-30b-5p;hsa-miR-934][hsa-miR-520a-5p;hsa-miR-934]
CEP19	3	[hsa-miR-139-5p;hsa-miR-218-1-3p;hsa-miR-559][hsa-miR-548a-5p;hsa-miR-559][hsa-miR-548b-5p;hsa-miR-584-5p]
CEP192	3	[hsa-let-7b-3p;hsa-let-7f-1-3p][hsa-let-7b-3p;hsa-let-7f-1-3p;hsa-miR-381][hsa-let-7f-1-3p;hsa-miR-381]
CEP350	7	[hsa-miR-195-5p;hsa-miR-20b-3p][hsa-miR-200b-3p;hsa-miR-374b-5p;hsa-miR-92b-3p][hsa-miR-26a-2-3p;hsa-miR-548v][hsa-miR-32-3p;hsa-miR-374b-5p][hsa-miR-320d;hsa-miR-374b-5p;hsa-miR-92b-3p][hsa-miR-374b-5p;hsa-miR-7-1-3p;hsa-miR-92b-3p][hsa-miR-374b-5p;hsa-miR-92b-3p]
CEP41	6	[hsa-let-7b-3p;hsa-miR-30b-5p;hsa-miR-429][hsa-let-7b-3p;hsa-miR-429][hsa-miR-128;hsa-miR-3691-5p][hsa-miR-148a-5p;hsa-miR-206;hsa-miR-3691-5p][hsa-miR-148a-5p;hsa-miR-3691-5p][hsa-miR-182-5p;hsa-miR-30d-5p]
CEP44	8	[hsa-miR-130b-5p;hsa-miR-30b-5p;hsa-miR-505-3p][hsa-miR-3065-5p;hsa-miR-30b-5p;hsa-miR-505-3p][hsa-miR-3065-5p;hsa-miR-505-3p][hsa-miR-30b-5p;hsa-miR-30c-5p;hsa-miR-505-3p][hsa-miR-30b-5p;hsa-miR-369-3p;hsa-miR-505-3p][hsa-miR-30b-5p;hsa-miR-505-3p;hsa-miR-577][hsa-miR-374c-5p;hsa-miR-505-3p][hsa-miR-374c-5p;hsa-miR-505-3p;hsa-miR-539-5p]
CEP55	6	[hsa-miR-130b-3p;hsa-miR-19a-3p][hsa-miR-138-5p;hsa-miR-143-5p;hsa-miR-3940-3p][hsa-miR-138-5p;hsa-miR-148b-3p][hsa-miR-138-5p;hsa-miR-301a-3p][hsa-miR-143-5p;hsa-miR-195-5p][hsa-miR-195-5p;hsa-miR-19a-3p]
CEP57	6	[hsa-let-7f-5p;hsa-miR-20b-5p][hsa-let-7f-5p;hsa-miR-20b-5p;hsa-miR-2116-3p][hsa-miR-1228-3p;hsa-miR-519a-3p][hsa-miR-141-3p;hsa-miR-93-5p][hsa-miR-20b-5p;hsa-miR-520g][hsa-miR-340-5p;hsa-miR-519a-3p]
CEP57L1	2	[hsa-miR-494;hsa-miR-497-3p;hsa-miR-590-3p][hsa-miR-497-3p;hsa-miR-590-3p]
CEP63	4	[hsa-miR-1276;hsa-miR-130a-5p;hsa-miR-299-5p][hsa-miR-1276;hsa-miR-130a-5p;hsa-miR-9-5p][hsa-miR-130a-5p;hsa-miR-299-5p][hsa-miR-299-5p;hsa-miR-590-3p]
CEP68	6	[hsa-miR-15b-3p;hsa-miR-210][hsa-miR-15b-3p;hsa-miR-210;hsa-miR-509-3p][hsa-miR-18b-5p;hsa-miR-26a-2-3p;hsa-miR-29b-3p][hsa-miR-18b-5p;hsa-miR-29b-3p][hsa-miR-18b-5p;hsa-miR-3662][hsa-miR-18b-5p;hsa-miR-508-3p]
CEP70	6	[hsa-miR-106a-5p;hsa-miR-106b-5p][hsa-miR-106a-5p;hsa-miR-17-5p;hsa-miR-20a-5p][hsa-miR-106a-5p;hsa-miR-20a-5p][hsa-miR-106a-5p;hsa-miR-20a-5p;hsa-miR-20b-5p][hsa-miR-106b-5p;hsa-miR-20b-5p;hsa-miR-545-5p][hsa-miR-20a-5p;hsa-miR-20b-5p]
CEP76	5	[hsa-let-7b-3p;hsa-miR-381;hsa-miR-548b-5p][hsa-let-7b-3p;hsa-miR-548b-5p][hsa-let-7b-3p;hsa-miR-548b-5p;hsa-miR-548y][hsa-let-7b-3p;hsa-miR-548b-5p;hsa-miR-590-3p][hsa-miR-381;hsa-miR-548b-5p;hsa-miR-559]
CEP78	7	[hsa-miR-1305;hsa-miR-548d-3p][hsa-miR-153;hsa-miR-196b-5p;hsa-miR-431-5p][hsa-miR-196b-5p;hsa-miR-431-5p][hsa-miR-203;hsa-miR-526b-5p;hsa-miR-548d-3p][hsa-miR-218-1-3p;hsa-miR-431-5p][hsa-miR-431-5p;hsa-miR-548d-3p][hsa-miR-526b-5p;hsa-miR-548d-3p]
CEP85	6	[hsa-miR-125b-5p;hsa-miR-146a-3p;hsa-miR-99a-5p][hsa-miR-146a-3p;hsa-miR-374a-5p;hsa-miR-99a-5p][hsa-miR-146a-3p;hsa-miR-582-3p;hsa-miR-99a-5p][hsa-miR-146a-3p;hsa-miR-99a-5p][hsa-miR-7-1-3p;hsa-miR-99a-5p][hsa-miR-99a-5p;hsa-miR-99b-5p]
CEP85L	9	[hsa-miR-16-5p;hsa-miR-30e-5p;hsa-miR-942][hsa-miR-29c-3p;hsa-miR-30e-5p;hsa-miR-942][hsa-miR-3065-5p;hsa-miR-513a-5p;hsa-miR-942][hsa-miR-3065-5p;hsa-miR-942][hsa-miR-30e-5p;hsa-miR-3922-3p;hsa-miR-942][hsa-miR-30e-5p;hsa-miR-942][hsa-miR-3136-5p;hsa-miR-3922-3p;hsa-miR-942][hsa-miR-3136-5p;hsa-miR-942][hsa-miR-543;hsa-miR-942]
CEP97	7	[hsa-miR-142-5p;hsa-miR-1909-5p;hsa-miR-29a-3p][hsa-miR-1909-5p;hsa-miR-29a-3p][hsa-miR-1909-5p;hsa-miR-29a-3p;hsa-miR-519b-3p][hsa-miR-1909-5p;hsa-miR-29a-3p;hsa-miR-641][hsa-miR-20a-5p;hsa-miR-29a-3p;hsa-miR-3609][hsa-miR-20a-5p;hsa-miR-29a-3p;hsa-miR-374b-3p][hsa-miR-29a-3p;hsa-miR-29b-3p]
CEPT1	6	[hsa-let-7a-3p;hsa-miR-125b-2-3p][hsa-let-7a-3p;hsa-miR-342-3p;hsa-miR-520g][hsa-miR-101-5p;hsa-miR-4326;hsa-miR-580][hsa-miR-342-3p;hsa-miR-520g][hsa-miR-4326;hsa-miR-505-3p][hsa-miR-4326;hsa-miR-580]
CERCAM	4	[hsa-let-7c;hsa-let-7g-5p][hsa-let-7c;hsa-miR-379-5p][hsa-let-7e-5p;hsa-let-7g-5p][hsa-let-7i-5p;hsa-miR-29b-2-5p]
CERS1	6	[hsa-miR-15a-5p;hsa-miR-15b-5p;hsa-miR-3605-5p][hsa-miR-15b-5p;hsa-miR-29a-3p;hsa-miR-548s][hsa-miR-15b-5p;hsa-miR-29b-3p;hsa-miR-3173-3p][hsa-miR-15b-5p;hsa-miR-3173-3p][hsa-miR-15b-5p;hsa-miR-4306][hsa-miR-29a-3p;hsa-miR-548s]
CERS2	6	[hsa-miR-149-5p;hsa-miR-186-5p;hsa-miR-664-5p][hsa-miR-15a-5p;hsa-miR-224-3p;hsa-miR-29b-2-5p][hsa-miR-186-5p;hsa-miR-2355-5p;hsa-miR-511][hsa-miR-186-5p;hsa-miR-497-5p;hsa-miR-664-5p][hsa-miR-186-5p;hsa-miR-664-5p][hsa-miR-224-3p;hsa-miR-29b-2-5p;hsa-miR-642a-5p]
CERS3	2	[hsa-let-7f-2-3p;hsa-miR-3143;hsa-miR-3919][hsa-miR-3143;hsa-miR-3919]
CERS5	6	[hsa-miR-1276;hsa-miR-18a-5p][hsa-miR-148a-3p;hsa-miR-18a-5p][hsa-miR-148a-3p;hsa-miR-3609][hsa-miR-148b-3p;hsa-miR-221-5p][hsa-miR-148b-3p;hsa-miR-744-3p][hsa-miR-18a-5p;hsa-miR-515-3p]
CERS6	6	[hsa-miR-1197;hsa-miR-452-5p;hsa-miR-592][hsa-miR-148a-3p;hsa-miR-17-5p;hsa-miR-27a-3p][hsa-miR-148a-3p;hsa-miR-27a-3p;hsa-miR-449a][hsa-miR-148a-3p;hsa-miR-27a-3p;hsa-miR-7-1-3p][hsa-miR-17-5p;hsa-miR-27a-3p][hsa-miR-452-5p;hsa-miR-592]
CES2	1	[hsa-miR-3176;hsa-miR-371a-5p]
CES4A	1	[hsa-miR-2355-5p;hsa-miR-3918]
CES5A	1	[hsa-miR-181d;hsa-miR-29a-5p]
CETN2	2	[hsa-miR-19b-2-5p;hsa-miR-625-5p][hsa-miR-625-5p;hsa-miR-636]
CETN3	7	[hsa-miR-181d;hsa-miR-212-3p;hsa-miR-577][hsa-miR-181d;hsa-miR-3163;hsa-miR-577][hsa-miR-181d;hsa-miR-548e;hsa-miR-577][hsa-miR-181d;hsa-miR-577][hsa-miR-212-3p;hsa-miR-410;hsa-miR-577][hsa-miR-410;hsa-miR-548t-5p;hsa-miR-577][hsa-miR-410;hsa-miR-576-5p;hsa-miR-577]
CFB	1	[hsa-miR-339-5p;hsa-miR-576-5p]
CFDP1	5	[hsa-miR-23b-3p;hsa-miR-376c][hsa-miR-27b-3p;hsa-miR-548j][hsa-miR-30c-5p;hsa-miR-3200-3p][hsa-miR-3200-3p;hsa-miR-3609;hsa-miR-376c][hsa-miR-3200-3p;hsa-miR-376c]
CFH	1	[hsa-miR-146a-5p;hsa-miR-765]
CFI	1	[hsa-miR-3679-3p;hsa-miR-526b-5p]
CFL1	7	[hsa-miR-185-3p;hsa-miR-2115-3p;hsa-miR-342-5p][hsa-miR-2115-3p;hsa-miR-342-5p][hsa-miR-224-5p;hsa-miR-3925-5p;hsa-miR-493-3p][hsa-miR-383;hsa-miR-3925-5p][hsa-miR-3907;hsa-miR-3925-5p][hsa-miR-3925-5p;hsa-miR-493-3p][hsa-miR-3925-5p;hsa-miR-493-3p;hsa-miR-642a-5p]
CFL2	6	[hsa-let-7e-5p;hsa-miR-145-5p][hsa-miR-145-5p;hsa-miR-192-3p;hsa-miR-499a-5p][hsa-miR-145-5p;hsa-miR-214-5p;hsa-miR-499a-5p][hsa-miR-3136-5p;hsa-miR-320a;hsa-miR-369-3p][hsa-miR-320a;hsa-miR-369-3p][hsa-miR-369-3p;hsa-miR-425-5p]
CFLAR	1	[hsa-miR-3934;hsa-miR-802]
CFTR	5	[hsa-let-7b-3p;hsa-miR-126-5p;hsa-miR-379-5p][hsa-let-7b-3p;hsa-miR-379-5p][hsa-let-7b-3p;hsa-miR-379-5p;hsa-miR-548e][hsa-miR-126-5p;hsa-miR-3163][hsa-miR-126-5p;hsa-miR-379-5p]
CGA	2	[hsa-miR-214-3p;hsa-miR-449c-5p][hsa-miR-214-3p;hsa-miR-449c-5p;hsa-miR-508-3p]
CGGBP1	3	[hsa-miR-22-5p;hsa-miR-222-3p][hsa-miR-342-3p;hsa-miR-362-3p;hsa-miR-378a-5p][hsa-miR-342-3p;hsa-miR-378a-5p]
CGN	7	[hsa-miR-125a-5p;hsa-miR-19b-3p][hsa-miR-125a-5p;hsa-miR-224-5p;hsa-miR-506-3p][hsa-miR-125b-5p;hsa-miR-1270;hsa-miR-224-5p][hsa-miR-125b-5p;hsa-miR-143-5p;hsa-miR-224-5p][hsa-miR-125b-5p;hsa-miR-224-5p][hsa-miR-125b-5p;hsa-miR-224-5p;hsa-miR-2278][hsa-miR-224-5p;hsa-miR-654-3p]
CGNL1	6	[hsa-let-7a-5p;hsa-miR-98][hsa-let-7f-5p;hsa-miR-488-3p][hsa-let-7i-5p;hsa-miR-9-3p;hsa-miR-98][hsa-miR-186-5p;hsa-miR-508-3p;hsa-miR-98][hsa-miR-508-3p;hsa-miR-98][hsa-miR-9-3p;hsa-miR-98]
CGREF1	6	[hsa-miR-1291;hsa-miR-31-5p;hsa-miR-331-3p][hsa-miR-1915-3p;hsa-miR-31-5p;hsa-miR-324-3p][hsa-miR-219-1-3p;hsa-miR-455-5p][hsa-miR-31-5p;hsa-miR-324-3p;hsa-miR-455-5p][hsa-miR-31-5p;hsa-miR-331-3p][hsa-miR-3691-5p;hsa-miR-455-5p]
CH25H	3	[hsa-let-7f-2-3p;hsa-miR-214-3p;hsa-miR-424-5p][hsa-let-7f-2-3p;hsa-miR-3619-5p;hsa-miR-431-5p][hsa-miR-424-5p;hsa-miR-494]
CHAC1	5	[hsa-miR-142-5p;hsa-miR-195-5p][hsa-miR-142-5p;hsa-miR-195-5p;hsa-miR-214-3p][hsa-miR-142-5p;hsa-miR-195-5p;hsa-miR-424-5p][hsa-miR-142-5p;hsa-miR-195-5p;hsa-miR-497-5p][hsa-miR-16-5p;hsa-miR-424-5p]
CHAC2	1	[hsa-miR-3156-5p;hsa-miR-616-3p]
CHAD	5	[hsa-miR-187-3p;hsa-miR-222-5p][hsa-miR-187-3p;hsa-miR-222-5p;hsa-miR-330-3p][hsa-miR-187-3p;hsa-miR-3187-3p;hsa-miR-330-3p][hsa-miR-187-3p;hsa-miR-330-3p][hsa-miR-222-5p;hsa-miR-3187-3p]
CHADL	1	[hsa-miR-1225-3p;hsa-miR-2110]
CHAF1A	6	[hsa-let-7b-3p;hsa-miR-26a-5p;hsa-miR-93-5p][hsa-let-7b-3p;hsa-miR-93-5p][hsa-miR-106b-5p;hsa-miR-20a-5p;hsa-miR-26b-5p][hsa-miR-106b-5p;hsa-miR-26b-5p][hsa-miR-106b-5p;hsa-miR-93-5p][hsa-miR-26b-5p;hsa-miR-520f]
CHAMP1	8	[hsa-miR-125a-5p;hsa-miR-125b-5p;hsa-miR-577][hsa-miR-125a-5p;hsa-miR-3131;hsa-miR-376c][hsa-miR-125a-5p;hsa-miR-376c][hsa-miR-125a-5p;hsa-miR-577][hsa-miR-125b-5p;hsa-miR-577][hsa-miR-376c;hsa-miR-577;hsa-miR-7-5p][hsa-miR-514a-3p;hsa-miR-577][hsa-miR-577;hsa-miR-7-5p]
CHCHD1	1	[hsa-miR-105-5p;hsa-miR-205-3p;hsa-miR-877-3p]
CHCHD10	3	[hsa-miR-32-5p;hsa-miR-363-3p;hsa-miR-92a-3p][hsa-miR-32-5p;hsa-miR-92a-3p][hsa-miR-32-5p;hsa-miR-92a-3p;hsa-miR-92b-3p]
CHCHD3	7	[hsa-miR-1179;hsa-miR-19b-1-5p;hsa-miR-3691-5p][hsa-miR-126-5p;hsa-miR-19b-1-5p][hsa-miR-126-5p;hsa-miR-19b-1-5p;hsa-miR-222-5p][hsa-miR-141-3p;hsa-miR-19b-1-5p;hsa-miR-30d-5p][hsa-miR-145-5p;hsa-miR-19b-1-5p;hsa-miR-30d-5p][hsa-miR-199a-3p;hsa-miR-942][hsa-miR-19b-1-5p;hsa-miR-3691-5p]
CHCHD4	4	[hsa-miR-30a-3p;hsa-miR-30d-3p;hsa-miR-656][hsa-miR-30a-3p;hsa-miR-30e-3p;hsa-miR-3149][hsa-miR-30a-3p;hsa-miR-3149;hsa-miR-374a-5p][hsa-miR-30d-3p;hsa-miR-374a-5p]
CHCHD7	3	[hsa-miR-181d;hsa-miR-425-3p][hsa-miR-2115-3p;hsa-miR-660-5p][hsa-miR-452-3p;hsa-miR-660-5p;hsa-miR-93-3p]
CHCHD8	1	[hsa-miR-508-3p;hsa-miR-532-3p]
CHD1	7	[hsa-miR-103a-3p;hsa-miR-152;hsa-miR-429][hsa-miR-148a-3p;hsa-miR-30e-5p][hsa-miR-152;hsa-miR-185-5p;hsa-miR-429][hsa-miR-152;hsa-miR-33b-5p;hsa-miR-429][hsa-miR-152;hsa-miR-429][hsa-miR-29a-5p;hsa-miR-29b-2-5p][hsa-miR-29a-5p;hsa-miR-29b-2-5p;hsa-miR-622]
CHD2	6	[hsa-miR-107;hsa-miR-429][hsa-miR-16-5p;hsa-miR-33a-5p][hsa-miR-16-5p;hsa-miR-33a-5p;hsa-miR-424-5p][hsa-miR-302b-3p;hsa-miR-33a-5p][hsa-miR-33a-5p;hsa-miR-34b-3p][hsa-miR-33a-5p;hsa-miR-34b-3p;hsa-miR-590-3p]
CHD3	7	[hsa-miR-196a-3p;hsa-miR-2116-3p;hsa-miR-450a-5p][hsa-miR-2110;hsa-miR-496;hsa-miR-942][hsa-miR-2116-3p;hsa-miR-450a-5p][hsa-miR-2116-3p;hsa-miR-450a-5p;hsa-miR-493-3p][hsa-miR-32-3p;hsa-miR-496;hsa-miR-942][hsa-miR-502-3p;hsa-miR-942][hsa-miR-532-3p;hsa-miR-942]
CHD4	5	[hsa-miR-146a-3p;hsa-miR-18b-5p][hsa-miR-18a-5p;hsa-miR-18b-5p][hsa-miR-18b-5p;hsa-miR-3914][hsa-miR-200c-5p;hsa-miR-491-5p][hsa-miR-3150b-3p;hsa-miR-9-5p]
CHD5	3	[hsa-miR-301b;hsa-miR-30a-5p][hsa-miR-301b;hsa-miR-30a-5p;hsa-miR-519b-3p][hsa-miR-30a-5p;hsa-miR-7-5p]
CHD6	6	[hsa-miR-190b;hsa-miR-548o-3p][hsa-miR-190b;hsa-miR-875-3p][hsa-miR-195-5p;hsa-miR-221-3p;hsa-miR-548b-3p][hsa-miR-221-3p;hsa-miR-497-5p;hsa-miR-548b-3p][hsa-miR-221-3p;hsa-miR-548b-3p][hsa-miR-369-3p;hsa-miR-429]
CHD7	5	[hsa-miR-17-3p;hsa-miR-548k][hsa-miR-17-3p;hsa-miR-668][hsa-miR-182-5p;hsa-miR-365a-5p][hsa-miR-182-5p;hsa-miR-365a-5p;hsa-miR-548y][hsa-miR-3677-3p;hsa-miR-935]
CHD8	6	[hsa-miR-1304-5p;hsa-miR-130b-5p;hsa-miR-221-3p][hsa-miR-130b-5p;hsa-miR-221-3p][hsa-miR-130b-5p;hsa-miR-221-3p;hsa-miR-423-5p][hsa-miR-132-3p;hsa-miR-493-3p][hsa-miR-184;hsa-miR-221-3p;hsa-miR-532-3p][hsa-miR-221-3p;hsa-miR-532-3p]
CHD9	6	[hsa-miR-106b-5p;hsa-miR-1976;hsa-miR-488-3p][hsa-miR-106b-5p;hsa-miR-32-5p;hsa-miR-548y][hsa-miR-106b-5p;hsa-miR-488-3p][hsa-miR-106b-5p;hsa-miR-488-3p;hsa-miR-578][hsa-miR-153;hsa-miR-548v][hsa-miR-374b-5p;hsa-miR-628-5p]
CHEK1	4	[hsa-miR-1226-3p;hsa-miR-186-3p;hsa-miR-195-5p][hsa-miR-16-5p;hsa-miR-195-5p][hsa-miR-16-5p;hsa-miR-195-5p;hsa-miR-497-5p][hsa-miR-195-5p;hsa-miR-2355-5p]
CHERP	7	[hsa-miR-129-5p;hsa-miR-141-5p][hsa-miR-129-5p;hsa-miR-141-5p;hsa-miR-222-3p][hsa-miR-129-5p;hsa-miR-141-5p;hsa-miR-27b-3p][hsa-miR-129-5p;hsa-miR-141-5p;hsa-miR-548v][hsa-miR-141-5p;hsa-miR-222-3p][hsa-miR-141-5p;hsa-miR-222-3p;hsa-miR-513a-5p][hsa-miR-141-5p;hsa-miR-27b-3p]
CHFR	7	[hsa-miR-2113;hsa-miR-218-5p;hsa-miR-340-5p][hsa-miR-2113;hsa-miR-340-5p][hsa-miR-218-5p;hsa-miR-340-5p][hsa-miR-222-3p;hsa-miR-26a-5p][hsa-miR-26a-5p;hsa-miR-29b-3p][hsa-miR-26a-5p;hsa-miR-29b-3p;hsa-miR-335-5p][hsa-miR-29b-3p;hsa-miR-340-5p]
CHGA	7	[hsa-miR-1276;hsa-miR-19b-1-5p][hsa-miR-1276;hsa-miR-19b-1-5p;hsa-miR-22-3p][hsa-miR-1276;hsa-miR-19b-1-5p;hsa-miR-32-5p][hsa-miR-137;hsa-miR-363-3p][hsa-miR-137;hsa-miR-363-3p;hsa-miR-582-5p][hsa-miR-19b-1-5p;hsa-miR-22-3p][hsa-miR-363-3p;hsa-miR-582-5p]
CHGB	7	[hsa-miR-1179;hsa-miR-222-3p;hsa-miR-577][hsa-miR-153;hsa-miR-181d][hsa-miR-153;hsa-miR-181d;hsa-miR-221-3p][hsa-miR-153;hsa-miR-181d;hsa-miR-324-3p][hsa-miR-186-5p;hsa-miR-222-3p][hsa-miR-186-5p;hsa-miR-222-3p;hsa-miR-889][hsa-miR-222-3p;hsa-miR-889]
CHI3L1	2	[hsa-miR-214-3p;hsa-miR-222-5p;hsa-miR-505-5p][hsa-miR-214-3p;hsa-miR-505-5p]
CHI3L2	3	[hsa-miR-188-3p;hsa-miR-3127-5p][hsa-miR-188-3p;hsa-miR-3127-5p;hsa-miR-3192][hsa-miR-188-3p;hsa-miR-3192]
CHIA	1	[hsa-miR-1286;hsa-miR-93-3p]
CHIC1	7	[hsa-let-7a-5p;hsa-miR-380-3p][hsa-let-7f-5p;hsa-miR-3682-3p;hsa-miR-590-5p][hsa-let-7i-5p;hsa-miR-590-5p][hsa-miR-20a-5p;hsa-miR-424-5p;hsa-miR-590-5p][hsa-miR-331-3p;hsa-miR-3682-3p;hsa-miR-590-5p][hsa-miR-3682-3p;hsa-miR-590-5p][hsa-miR-424-5p;hsa-miR-590-5p]
CHIC2	7	[hsa-miR-105-5p;hsa-miR-505-3p][hsa-miR-140-3p;hsa-miR-28-5p;hsa-miR-362-5p][hsa-miR-140-3p;hsa-miR-505-3p][hsa-miR-197-3p;hsa-miR-29b-3p][hsa-miR-197-3p;hsa-miR-29b-3p;hsa-miR-655][hsa-miR-28-5p;hsa-miR-362-5p][hsa-miR-28-5p;hsa-miR-362-5p;hsa-miR-607]
CHKA	1	[hsa-miR-374c-5p;hsa-miR-655;hsa-miR-876-5p]
CHKB	1	[hsa-miR-18a-3p;hsa-miR-4254]
CHL1	7	[hsa-let-7c;hsa-miR-27a-3p;hsa-miR-767-5p][hsa-miR-125a-5p;hsa-miR-15b-5p][hsa-miR-125a-5p;hsa-miR-15b-5p;hsa-miR-27a-3p][hsa-miR-125a-5p;hsa-miR-15b-5p;hsa-miR-3622b-3p][hsa-miR-125a-5p;hsa-miR-15b-5p;hsa-miR-532-5p][hsa-miR-125a-5p;hsa-miR-15b-5p;hsa-miR-542-3p][hsa-miR-15b-5p;hsa-miR-642a-5p]
CHM	4	[hsa-miR-1237;hsa-miR-125a-5p;hsa-miR-125b-5p][hsa-miR-125a-5p;hsa-miR-125b-5p;hsa-miR-500a-3p][hsa-miR-125a-5p;hsa-miR-125b-5p;hsa-miR-876-5p][hsa-miR-125a-5p;hsa-miR-452-3p]
CHML	4	[hsa-miR-1179;hsa-miR-577;hsa-miR-9-3p][hsa-miR-577;hsa-miR-7-1-3p][hsa-miR-577;hsa-miR-7-1-3p;hsa-miR-9-3p][hsa-miR-577;hsa-miR-9-3p]
CHMP1A	3	[hsa-miR-182-5p;hsa-miR-765;hsa-miR-96-5p][hsa-miR-3926;hsa-miR-765][hsa-miR-3926;hsa-miR-765;hsa-miR-96-5p]
CHMP1B	5	[hsa-miR-1271-5p;hsa-miR-181c-3p][hsa-miR-1271-5p;hsa-miR-590-3p][hsa-miR-181c-3p;hsa-miR-182-5p;hsa-miR-767-5p][hsa-miR-181c-3p;hsa-miR-491-3p;hsa-miR-767-5p][hsa-miR-182-5p;hsa-miR-656]
CHMP2B	4	[hsa-miR-1271-5p;hsa-miR-940][hsa-miR-203;hsa-miR-32-3p;hsa-miR-940][hsa-miR-3130-3p;hsa-miR-506-3p][hsa-miR-9-5p;hsa-miR-940]
CHMP3	4	[hsa-miR-130a-3p;hsa-miR-373-3p][hsa-miR-130a-3p;hsa-miR-93-3p][hsa-miR-142-3p;hsa-miR-301b;hsa-miR-579][hsa-miR-579;hsa-miR-93-3p]
CHMP4A	1	[hsa-miR-1271-5p;hsa-miR-3137]
CHMP4B	5	[hsa-miR-1270;hsa-miR-132-3p;hsa-miR-452-3p][hsa-miR-1270;hsa-miR-452-3p;hsa-miR-628-5p][hsa-miR-146a-5p;hsa-miR-25-3p;hsa-miR-452-3p][hsa-miR-146a-5p;hsa-miR-452-3p][hsa-miR-301a-3p;hsa-miR-449b-5p;hsa-miR-452-3p]
CHMP4C	6	[hsa-miR-27b-5p;hsa-miR-331-5p;hsa-miR-365a-3p][hsa-miR-27b-5p;hsa-miR-365a-3p][hsa-miR-27b-5p;hsa-miR-9-3p][hsa-miR-320d;hsa-miR-369-3p][hsa-miR-369-3p;hsa-miR-9-3p][hsa-miR-545-5p;hsa-miR-9-3p]
CHMP5	6	[hsa-miR-125b-2-3p;hsa-miR-200c-3p][hsa-miR-125b-2-3p;hsa-miR-3065-5p][hsa-miR-125b-2-3p;hsa-miR-3065-5p;hsa-miR-337-3p][hsa-miR-125b-2-3p;hsa-miR-3065-5p;hsa-miR-500b][hsa-miR-205-5p;hsa-miR-500b;hsa-miR-577][hsa-miR-205-5p;hsa-miR-577;hsa-miR-590-3p]
CHMP7	6	[hsa-miR-203;hsa-miR-320e;hsa-miR-363-3p][hsa-miR-219-5p;hsa-miR-363-3p;hsa-miR-92a-3p][hsa-miR-221-5p;hsa-miR-32-5p;hsa-miR-320e][hsa-miR-320e;hsa-miR-363-3p][hsa-miR-34c-5p;hsa-miR-92a-3p][hsa-miR-363-3p;hsa-miR-92a-3p]
CHN1	5	[hsa-miR-106a-5p;hsa-miR-181c-5p;hsa-miR-30a-5p][hsa-miR-181c-5p;hsa-miR-30a-5p][hsa-miR-181c-5p;hsa-miR-30a-5p;hsa-miR-3667-5p][hsa-miR-181c-5p;hsa-miR-30a-5p;hsa-miR-548l][hsa-miR-30a-5p;hsa-miR-582-5p]
CHN2	6	[hsa-miR-129-5p;hsa-miR-20b-3p;hsa-miR-221-3p][hsa-miR-138-2-3p;hsa-miR-579][hsa-miR-187-5p;hsa-miR-20b-3p;hsa-miR-221-3p][hsa-miR-20b-3p;hsa-miR-221-3p][hsa-miR-20b-3p;hsa-miR-221-3p;hsa-miR-421][hsa-miR-221-3p;hsa-miR-421]
CHODL	8	[hsa-miR-203;hsa-miR-452-3p][hsa-miR-3198;hsa-miR-3662;hsa-miR-452-3p][hsa-miR-3198;hsa-miR-452-3p][hsa-miR-3662;hsa-miR-452-3p][hsa-miR-3662;hsa-miR-452-3p;hsa-miR-9-5p][hsa-miR-374a-3p;hsa-miR-452-3p;hsa-miR-518a-5p][hsa-miR-452-3p;hsa-miR-502-5p;hsa-miR-518a-5p][hsa-miR-452-3p;hsa-miR-518a-5p]
CHORDC1	5	[hsa-miR-15b-5p;hsa-miR-195-5p;hsa-miR-548b-3p][hsa-miR-15b-5p;hsa-miR-377-3p][hsa-miR-15b-5p;hsa-miR-497-5p][hsa-miR-26a-5p;hsa-miR-497-5p;hsa-miR-519a-5p][hsa-miR-497-5p;hsa-miR-519a-5p]
CHPF	1	[hsa-miR-217;hsa-miR-760]
CHPF2	3	[hsa-let-7a-2-3p;hsa-miR-185-3p][hsa-let-7a-2-3p;hsa-miR-185-3p;hsa-miR-570-3p][hsa-miR-185-3p;hsa-miR-570-3p]
CHPT1	6	[hsa-let-7b-5p;hsa-miR-15b-5p;hsa-miR-222-5p][hsa-let-7b-5p;hsa-miR-222-5p][hsa-miR-141-5p;hsa-miR-15a-5p;hsa-miR-7-1-3p][hsa-miR-15b-5p;hsa-miR-222-5p][hsa-miR-222-5p;hsa-miR-3619-5p;hsa-miR-497-5p][hsa-miR-222-5p;hsa-miR-497-5p]
CHRD	8	[hsa-miR-124-3p;hsa-miR-486-3p;hsa-miR-505-5p][hsa-miR-124-3p;hsa-miR-493-5p;hsa-miR-505-5p][hsa-miR-124-3p;hsa-miR-505-5p][hsa-miR-124-3p;hsa-miR-505-5p;hsa-miR-506-3p][hsa-miR-183-3p;hsa-miR-505-5p][hsa-miR-196a-5p;hsa-miR-493-5p][hsa-miR-2355-5p;hsa-miR-449c-5p;hsa-miR-505-5p][hsa-miR-2355-5p;hsa-miR-505-5p]
CHRDL1	7	[hsa-miR-140-3p;hsa-miR-181a-5p;hsa-miR-338-5p][hsa-miR-140-3p;hsa-miR-338-5p][hsa-miR-140-3p;hsa-miR-338-5p;hsa-miR-3607-3p][hsa-miR-140-3p;hsa-miR-362-3p;hsa-miR-452-5p][hsa-miR-140-3p;hsa-miR-362-3p;hsa-miR-589-5p][hsa-miR-362-3p;hsa-miR-452-5p][hsa-miR-362-3p;hsa-miR-589-5p]
CHRDL2	4	[hsa-miR-130b-3p;hsa-miR-301b][hsa-miR-130b-3p;hsa-miR-301b;hsa-miR-369-3p][hsa-miR-130b-3p;hsa-miR-301b;hsa-miR-374a-5p][hsa-miR-130b-3p;hsa-miR-301b;hsa-miR-889]
CHRM1	6	[hsa-miR-103a-3p;hsa-miR-199b-5p;hsa-miR-934][hsa-miR-103a-3p;hsa-miR-934][hsa-miR-107;hsa-miR-199b-5p][hsa-miR-107;hsa-miR-199b-5p;hsa-miR-934][hsa-miR-15a-3p;hsa-miR-199b-5p;hsa-miR-934][hsa-miR-199b-5p;hsa-miR-3605-5p;hsa-miR-934]
CHRM2	8	[hsa-miR-106a-3p;hsa-miR-106a-5p;hsa-miR-340-5p][hsa-miR-106a-3p;hsa-miR-129-2-3p;hsa-miR-340-5p][hsa-miR-106a-3p;hsa-miR-340-5p][hsa-miR-106a-5p;hsa-miR-340-5p][hsa-miR-106a-5p;hsa-miR-340-5p;hsa-miR-519c-3p][hsa-miR-129-2-3p;hsa-miR-340-5p][hsa-miR-129-2-3p;hsa-miR-340-5p;hsa-miR-519b-3p][hsa-miR-340-5p;hsa-miR-519b-3p]
CHRM3	6	[hsa-miR-103a-2-5p;hsa-miR-1287;hsa-miR-34a-5p][hsa-miR-103a-2-5p;hsa-miR-449a][hsa-miR-1287;hsa-miR-34a-5p][hsa-miR-1287;hsa-miR-486-3p][hsa-miR-34b-5p;hsa-miR-449a][hsa-miR-34b-5p;hsa-miR-449a;hsa-miR-449b-5p]
CHRNA2	4	[hsa-miR-23a-3p;hsa-miR-23b-3p;hsa-miR-3065-3p][hsa-miR-23a-3p;hsa-miR-23c][hsa-miR-23a-3p;hsa-miR-23c;hsa-miR-3065-3p][hsa-miR-23a-3p;hsa-miR-3065-3p]
CHRNA5	3	[hsa-miR-15b-5p;hsa-miR-19b-1-5p][hsa-miR-19b-1-5p;hsa-miR-452-3p;hsa-miR-9-3p][hsa-miR-19b-1-5p;hsa-miR-9-3p]
CHRNA6	2	[hsa-miR-3607-3p;hsa-miR-511][hsa-miR-3607-3p;hsa-miR-511;hsa-miR-589-3p]
CHRNA9	1	[hsa-miR-105-5p;hsa-miR-19a-5p]
CHRNE	6	[hsa-miR-1260a;hsa-miR-142-3p][hsa-miR-15a-5p;hsa-miR-15b-5p][hsa-miR-15a-5p;hsa-miR-16-5p][hsa-miR-15a-5p;hsa-miR-16-5p;hsa-miR-29a-5p][hsa-miR-15a-5p;hsa-miR-16-5p;hsa-miR-374c-5p][hsa-miR-15a-5p;hsa-miR-208b;hsa-miR-374c-5p]
CHST1	8	[hsa-miR-101-3p;hsa-miR-128;hsa-miR-152][hsa-miR-124-3p;hsa-miR-154-3p;hsa-miR-600][hsa-miR-124-3p;hsa-miR-2114-3p;hsa-miR-3910][hsa-miR-124-3p;hsa-miR-3910][hsa-miR-124-3p;hsa-miR-600][hsa-miR-128;hsa-miR-152][hsa-miR-152;hsa-miR-34c-5p][hsa-miR-152;hsa-miR-499a-3p]
CHST10	4	[hsa-miR-1262;hsa-miR-23a-3p;hsa-miR-23c][hsa-miR-1262;hsa-miR-23b-3p][hsa-miR-130a-5p;hsa-miR-23a-3p][hsa-miR-137;hsa-miR-23a-3p;hsa-miR-23c]
CHST11	5	[hsa-miR-126-5p;hsa-miR-135b-5p][hsa-miR-135b-5p;hsa-miR-514a-3p;hsa-miR-628-5p][hsa-miR-135b-5p;hsa-miR-628-5p][hsa-miR-148b-3p;hsa-miR-152][hsa-miR-378a-3p;hsa-miR-944]
CHST12	4	[hsa-miR-101-3p;hsa-miR-122-5p][hsa-miR-101-3p;hsa-miR-122-5p;hsa-miR-656][hsa-miR-101-3p;hsa-miR-34c-5p;hsa-miR-656][hsa-miR-34c-5p;hsa-miR-508-5p]
CHST14	4	[hsa-miR-129-2-3p;hsa-miR-193a-5p;hsa-miR-590-3p][hsa-miR-193a-5p;hsa-miR-379-5p][hsa-miR-193a-5p;hsa-miR-590-3p][hsa-miR-3148;hsa-miR-379-5p]
CHST15	4	[hsa-miR-153;hsa-miR-9-5p][hsa-miR-23a-3p;hsa-miR-3607-3p][hsa-miR-23b-3p;hsa-miR-497-3p;hsa-miR-9-5p][hsa-miR-23b-3p;hsa-miR-9-5p]
CHST2	8	[hsa-miR-197-3p;hsa-miR-200c-3p;hsa-miR-30e-5p][hsa-miR-200c-3p;hsa-miR-203;hsa-miR-30e-5p][hsa-miR-200c-3p;hsa-miR-27a-5p;hsa-miR-30e-5p][hsa-miR-200c-3p;hsa-miR-30a-5p;hsa-miR-30e-5p][hsa-miR-200c-3p;hsa-miR-30e-5p][hsa-miR-200c-3p;hsa-miR-30e-5p;hsa-miR-3117-3p][hsa-miR-200c-3p;hsa-miR-30e-5p;hsa-miR-374c-5p][hsa-miR-26b-5p;hsa-miR-30e-5p]
CHST3	3	[hsa-miR-224-5p;hsa-miR-26a-5p][hsa-miR-224-5p;hsa-miR-26a-5p;hsa-miR-26b-5p][hsa-miR-26a-5p;hsa-miR-26b-5p]
CHST4	2	[hsa-miR-24-3p;hsa-miR-519a-5p][hsa-miR-31-5p;hsa-miR-485-5p;hsa-miR-519a-5p]
CHST7	1	[hsa-miR-126-5p;hsa-miR-92a-3p]
CHST8	4	[hsa-miR-218-5p;hsa-miR-373-3p;hsa-miR-518c-5p][hsa-miR-320b;hsa-miR-373-3p;hsa-miR-518c-5p][hsa-miR-320b;hsa-miR-518c-5p][hsa-miR-373-3p;hsa-miR-518c-5p;hsa-miR-96-3p]
CHST9	8	[hsa-miR-1306-3p;hsa-miR-323a-3p;hsa-miR-9-5p][hsa-miR-136-3p;hsa-miR-29b-2-5p;hsa-miR-9-5p][hsa-miR-136-3p;hsa-miR-9-5p][hsa-miR-137;hsa-miR-192-3p][hsa-miR-137;hsa-miR-192-3p;hsa-miR-664-3p][hsa-miR-137;hsa-miR-202-5p][hsa-miR-323a-3p;hsa-miR-664-5p;hsa-miR-9-5p][hsa-miR-323a-3p;hsa-miR-9-5p]
CHSY1	4	[hsa-miR-200a-3p;hsa-miR-200c-3p][hsa-miR-26a-5p;hsa-miR-28-3p;hsa-miR-578][hsa-miR-29c-3p;hsa-miR-369-3p][hsa-miR-362-5p;hsa-miR-501-5p]
CHSY3	6	[hsa-miR-101-3p;hsa-miR-199b-3p;hsa-miR-19a-3p][hsa-miR-129-2-3p;hsa-miR-199b-3p;hsa-miR-19a-3p][hsa-miR-199b-3p;hsa-miR-19a-3p][hsa-miR-199b-3p;hsa-miR-19a-3p;hsa-miR-671-3p][hsa-miR-19a-3p;hsa-miR-33a-5p][hsa-miR-3129-5p;hsa-miR-409-3p]
CHTF8	4	[hsa-miR-105-5p;hsa-miR-22-5p;hsa-miR-29c-3p][hsa-miR-1269a;hsa-miR-362-3p][hsa-miR-1269a;hsa-miR-362-3p;hsa-miR-500b][hsa-miR-22-5p;hsa-miR-29c-3p;hsa-miR-548b-3p]
CHTOP	7	[hsa-miR-138-5p;hsa-miR-16-1-3p;hsa-miR-320e][hsa-miR-138-5p;hsa-miR-320e][hsa-miR-138-5p;hsa-miR-320e;hsa-miR-361-5p][hsa-miR-138-5p;hsa-miR-320e;hsa-miR-942][hsa-miR-16-1-3p;hsa-miR-485-3p][hsa-miR-28-5p;hsa-miR-485-3p][hsa-miR-485-3p;hsa-miR-548q]
CHUK	6	[hsa-miR-130a-5p;hsa-miR-362-3p;hsa-miR-374c-5p][hsa-miR-130b-5p;hsa-miR-374c-5p][hsa-miR-224-3p;hsa-miR-329;hsa-miR-374c-5p][hsa-miR-23a-3p;hsa-miR-362-3p;hsa-miR-374c-5p][hsa-miR-329;hsa-miR-374c-5p;hsa-miR-607][hsa-miR-362-3p;hsa-miR-374c-5p]
CHURC1	5	[hsa-miR-186-5p;hsa-miR-3148;hsa-miR-577][hsa-miR-30a-3p;hsa-miR-3148;hsa-miR-577][hsa-miR-30d-3p;hsa-miR-374b-3p][hsa-miR-30d-3p;hsa-miR-374b-3p;hsa-miR-516b-5p][hsa-miR-3148;hsa-miR-577]
CIAPIN1	3	[hsa-miR-15a-5p;hsa-miR-424-5p][hsa-miR-16-5p;hsa-miR-424-5p][hsa-miR-195-5p;hsa-miR-424-5p]
CIB2	1	[hsa-miR-448;hsa-miR-628-5p]
CIB4	3	[hsa-miR-518f-5p;hsa-miR-519a-5p][hsa-miR-518f-5p;hsa-miR-574-5p][hsa-miR-519a-5p;hsa-miR-574-5p]
CIC	7	[hsa-miR-140-3p;hsa-miR-216a][hsa-miR-221-5p;hsa-miR-31-5p;hsa-miR-3614-5p][hsa-miR-30a-3p;hsa-miR-3614-5p][hsa-miR-31-5p;hsa-miR-3614-5p][hsa-miR-31-5p;hsa-miR-423-5p;hsa-miR-766-3p][hsa-miR-423-5p;hsa-miR-766-3p][hsa-miR-423-5p;hsa-miR-766-3p;hsa-miR-99a-3p]
CIDEA	1	[hsa-miR-24-3p;hsa-miR-335-5p]
CIITA	4	[hsa-miR-142-3p;hsa-miR-148b-3p][hsa-miR-142-3p;hsa-miR-148b-3p;hsa-miR-152][hsa-miR-142-3p;hsa-miR-152][hsa-miR-148b-3p;hsa-miR-152]
CILP	5	[hsa-miR-197-3p;hsa-miR-26a-5p;hsa-miR-342-3p][hsa-miR-197-3p;hsa-miR-342-3p][hsa-miR-197-3p;hsa-miR-342-3p;hsa-miR-495][hsa-miR-197-3p;hsa-miR-3678-3p;hsa-miR-495][hsa-miR-3616-3p;hsa-miR-542-3p]
CINP	4	[hsa-miR-107;hsa-miR-449b-3p;hsa-miR-548q][hsa-miR-107;hsa-miR-766-3p][hsa-miR-449b-3p;hsa-miR-548q][hsa-miR-449b-3p;hsa-miR-766-3p]
CIR1	4	[hsa-miR-1270;hsa-miR-519a-5p;hsa-miR-589-3p][hsa-miR-143-3p;hsa-miR-519a-5p;hsa-miR-589-3p][hsa-miR-519a-5p;hsa-miR-524-5p;hsa-miR-589-3p][hsa-miR-519a-5p;hsa-miR-589-3p]
CIRBP	6	[hsa-miR-188-3p;hsa-miR-338-5p][hsa-miR-18a-5p;hsa-miR-30c-5p][hsa-miR-18a-5p;hsa-miR-30c-5p;hsa-miR-3610][hsa-miR-18a-5p;hsa-miR-30c-5p;hsa-miR-410][hsa-miR-18a-5p;hsa-miR-30c-5p;hsa-miR-484][hsa-miR-18a-5p;hsa-miR-616-3p]
CIRH1A	1	[hsa-miR-3611;hsa-miR-556-3p;hsa-miR-758]
CISD1	4	[hsa-miR-105-5p;hsa-miR-16-1-3p;hsa-miR-30e-3p][hsa-miR-30a-3p;hsa-miR-7-2-3p][hsa-miR-30d-3p;hsa-miR-421;hsa-miR-7-2-3p][hsa-miR-30d-3p;hsa-miR-7-2-3p]
CISD2	5	[hsa-miR-125b-2-3p;hsa-miR-199b-3p][hsa-miR-199a-3p;hsa-miR-199b-3p;hsa-miR-7-5p][hsa-miR-199a-3p;hsa-miR-7-5p][hsa-miR-199b-3p;hsa-miR-320a;hsa-miR-7-5p][hsa-miR-199b-3p;hsa-miR-7-5p]
CISD3	4	[hsa-miR-1304-5p;hsa-miR-26a-5p][hsa-miR-183-5p;hsa-miR-3157-5p;hsa-miR-943][hsa-miR-26a-5p;hsa-miR-340-5p][hsa-miR-3157-5p;hsa-miR-943]
CISH	1	[hsa-miR-22-3p;hsa-miR-24-3p]
CIT	5	[hsa-miR-129-1-3p;hsa-miR-454-3p][hsa-miR-148a-3p;hsa-miR-2277-3p][hsa-miR-20b-5p;hsa-miR-875-3p][hsa-miR-495;hsa-miR-9-5p][hsa-miR-9-5p;hsa-miR-935]
CITED1	2	[hsa-miR-1251;hsa-miR-135a-5p][hsa-miR-135a-5p;hsa-miR-3119]
CITED2	8	[hsa-miR-1305;hsa-miR-320c;hsa-miR-501-5p][hsa-miR-148a-5p;hsa-miR-181a-2-3p][hsa-miR-205-3p;hsa-miR-222-3p;hsa-miR-501-5p][hsa-miR-222-3p;hsa-miR-3126-5p;hsa-miR-501-5p][hsa-miR-222-3p;hsa-miR-501-5p][hsa-miR-320c;hsa-miR-34c-5p;hsa-miR-501-5p][hsa-miR-320c;hsa-miR-501-5p][hsa-miR-320c;hsa-miR-501-5p;hsa-miR-888-5p]
CITED4	2	[hsa-miR-130b-5p;hsa-miR-24-3p][hsa-miR-130b-5p;hsa-miR-24-3p;hsa-miR-3116]
CIZ1	2	[hsa-miR-194-5p;hsa-miR-548d-3p;hsa-miR-548x-3p][hsa-miR-548d-3p;hsa-miR-548x-3p]
CKAP4	7	[hsa-miR-148a-3p;hsa-miR-539-5p][hsa-miR-148a-3p;hsa-miR-579;hsa-miR-7-1-3p][hsa-miR-148a-3p;hsa-miR-7-1-3p][hsa-miR-3607-3p;hsa-miR-497-3p][hsa-miR-3607-3p;hsa-miR-497-3p;hsa-miR-582-5p][hsa-miR-3607-3p;hsa-miR-497-3p;hsa-miR-7-1-3p][hsa-miR-3607-3p;hsa-miR-545-5p]
CKAP5	5	[hsa-miR-1227;hsa-miR-3127-5p;hsa-miR-340-5p][hsa-miR-1227;hsa-miR-454-3p][hsa-miR-1253;hsa-miR-3127-5p][hsa-miR-155-5p;hsa-miR-3127-5p][hsa-miR-3169;hsa-miR-9-3p]
CKB	7	[hsa-miR-1258;hsa-miR-16-5p][hsa-miR-1258;hsa-miR-3187-3p][hsa-miR-16-5p;hsa-miR-328][hsa-miR-16-5p;hsa-miR-328;hsa-miR-484][hsa-miR-194-5p;hsa-miR-3187-3p][hsa-miR-195-5p;hsa-miR-3065-3p][hsa-miR-3065-3p;hsa-miR-3115]
CKLF	1	[hsa-miR-374c-5p;hsa-miR-655]
CKM	1	[hsa-miR-3187-3p;hsa-miR-92a-1-5p]
CKMT2	5	[hsa-miR-126-3p;hsa-miR-3188;hsa-miR-548x-3p][hsa-miR-126-3p;hsa-miR-548x-3p][hsa-miR-126-3p;hsa-miR-548x-3p;hsa-miR-940][hsa-miR-3188;hsa-miR-365a-5p][hsa-miR-548x-3p;hsa-miR-940]
CKS1B	8	[hsa-miR-1304-5p;hsa-miR-9-3p][hsa-miR-18a-5p;hsa-miR-3662;hsa-miR-520h][hsa-miR-18a-5p;hsa-miR-485-5p][hsa-miR-18a-5p;hsa-miR-485-5p;hsa-miR-520h][hsa-miR-18a-5p;hsa-miR-485-5p;hsa-miR-539-5p][hsa-miR-18a-5p;hsa-miR-485-5p;hsa-miR-578][hsa-miR-18a-5p;hsa-miR-485-5p;hsa-miR-877-3p][hsa-miR-18a-5p;hsa-miR-520h]
CKS2	5	[hsa-let-7a-2-3p;hsa-miR-26a-5p][hsa-let-7g-3p;hsa-miR-26a-5p;hsa-miR-548f][hsa-let-7g-3p;hsa-miR-301a-3p][hsa-miR-130b-3p;hsa-miR-556-5p][hsa-miR-26a-5p;hsa-miR-548f]
CLASP1	5	[hsa-miR-135a-5p;hsa-miR-3161][hsa-miR-182-3p;hsa-miR-2115-5p;hsa-miR-508-3p][hsa-miR-200b-3p;hsa-miR-31-5p][hsa-miR-200b-3p;hsa-miR-429][hsa-miR-2115-5p;hsa-miR-508-3p]
CLASP2	5	[hsa-let-7f-5p;hsa-miR-2355-3p;hsa-miR-3942-5p][hsa-miR-1271-5p;hsa-miR-26b-5p;hsa-miR-29b-2-5p][hsa-miR-224-5p;hsa-miR-338-3p][hsa-miR-224-5p;hsa-miR-589-5p][hsa-miR-2355-3p;hsa-miR-3661]
CLASRP	6	[hsa-miR-103a-3p;hsa-miR-16-5p;hsa-miR-424-5p][hsa-miR-15a-5p;hsa-miR-16-5p;hsa-miR-424-5p][hsa-miR-16-5p;hsa-miR-195-5p][hsa-miR-16-5p;hsa-miR-195-5p;hsa-miR-497-5p][hsa-miR-16-5p;hsa-miR-424-5p][hsa-miR-16-5p;hsa-miR-424-5p;hsa-miR-497-5p]
CLCA2	3	[hsa-miR-193a-5p;hsa-miR-374c-5p;hsa-miR-409-5p][hsa-miR-193a-5p;hsa-miR-495][hsa-miR-193a-5p;hsa-miR-548j]
CLCC1	8	[hsa-miR-1257;hsa-miR-181a-5p;hsa-miR-181c-5p][hsa-miR-181a-5p;hsa-miR-181c-5p][hsa-miR-181a-5p;hsa-miR-181c-5p;hsa-miR-30a-3p][hsa-miR-181a-5p;hsa-miR-181c-5p;hsa-miR-30d-5p][hsa-miR-181a-5p;hsa-miR-223-5p][hsa-miR-181a-5p;hsa-miR-30a-3p][hsa-miR-181a-5p;hsa-miR-30d-3p][hsa-miR-30a-5p;hsa-miR-30e-3p]
CLCF1	8	[hsa-miR-10b-5p;hsa-miR-30b-5p;hsa-miR-374c-5p][hsa-miR-136-3p;hsa-miR-216a;hsa-miR-374c-5p][hsa-miR-155-5p;hsa-miR-30b-5p;hsa-miR-374c-5p][hsa-miR-216a;hsa-miR-374c-5p][hsa-miR-27a-5p;hsa-miR-30b-5p;hsa-miR-374c-5p][hsa-miR-27a-5p;hsa-miR-374c-5p][hsa-miR-30b-5p;hsa-miR-3682-3p;hsa-miR-374c-5p][hsa-miR-30b-5p;hsa-miR-374c-5p]
CLCN2	8	[hsa-let-7f-2-3p;hsa-miR-145-5p;hsa-miR-30a-5p][hsa-let-7f-2-3p;hsa-miR-29b-2-5p][hsa-let-7f-2-3p;hsa-miR-30a-5p][hsa-miR-145-5p;hsa-miR-216a][hsa-miR-145-5p;hsa-miR-216a;hsa-miR-576-5p][hsa-miR-145-5p;hsa-miR-216a;hsa-miR-616-3p][hsa-miR-145-5p;hsa-miR-24-3p][hsa-miR-145-5p;hsa-miR-889]
CLCN3	6	[hsa-miR-1248;hsa-miR-589-3p][hsa-miR-1248;hsa-miR-875-3p][hsa-miR-153;hsa-miR-16-5p;hsa-miR-29c-5p][hsa-miR-153;hsa-miR-29c-5p][hsa-miR-155-5p;hsa-miR-450a-5p][hsa-miR-22-5p;hsa-miR-222-5p]
[truncated: 9,531 more rows]

## Sheet: Predicted Interactions
Gene Symbol	MiRNA
A1CF	hsa-miR-15a-5p
A1CF	hsa-miR-16-5p
A2LD1	hsa-miR-106a-5p
A2LD1	hsa-miR-17-5p
A2LD1	hsa-miR-3688-3p
A2LD1	hsa-miR-548f
A2LD1	hsa-miR-93-3p
A2LD1	hsa-miR-944
A2ML1	hsa-miR-17-5p
A2ML1	hsa-miR-3679-3p
A2ML1	hsa-miR-504
AADAT	hsa-miR-150-5p
AADAT	hsa-miR-16-5p
AADAT	hsa-miR-186-3p
AADAT	hsa-miR-224-5p
AADAT	hsa-miR-577
AADAT	hsa-miR-99b-3p
AAK1	hsa-miR-106b-5p
AAK1	hsa-miR-203
AAK1	hsa-miR-20b-5p
AAK1	hsa-miR-28-5p
AAK1	hsa-miR-3609
AAK1	hsa-miR-3651
AAK1	hsa-miR-3928
AAK1	hsa-miR-766-3p
AAMP	hsa-miR-103a-2-5p
AAMP	hsa-miR-24-3p
AAMP	hsa-miR-3153
AAMP	hsa-miR-329
AAMP	hsa-miR-34c-5p
AAMP	hsa-miR-4284
AAMP	hsa-miR-708-3p
AARS	hsa-miR-2355-3p
AARS	hsa-miR-26b-3p
AARS	hsa-miR-581
AARS	hsa-miR-942
AASDHPPT	hsa-miR-16-2-3p
AASDHPPT	hsa-miR-181b-5p
AASDHPPT	hsa-miR-204-5p
AASDHPPT	hsa-miR-221-5p
AASDHPPT	hsa-miR-30a-3p
AASDHPPT	hsa-miR-30d-3p
AASDHPPT	hsa-miR-30e-3p
AASDHPPT	hsa-miR-526b-5p
AATK	hsa-miR-182-5p
AATK	hsa-miR-196a-3p
AATK	hsa-miR-25-3p
AATK	hsa-miR-3942-5p
AATK	hsa-miR-424-5p
AATK	hsa-miR-92a-3p
AATK	hsa-miR-9-5p
ABAT	hsa-miR-135a-5p
ABAT	hsa-miR-135b-5p
ABAT	hsa-miR-2355-5p
ABAT	hsa-miR-340-5p
ABAT	hsa-miR-3653
ABAT	hsa-miR-374b-5p
ABAT	hsa-miR-409-5p
ABAT	hsa-miR-505-5p
ABAT	hsa-miR-96-5p
ABCA1	hsa-let-7a-3p
ABCA1	hsa-miR-101-3p
ABCA1	hsa-miR-128
ABCA1	hsa-miR-142-3p
ABCA1	hsa-miR-148a-3p
ABCA1	hsa-miR-17-5p
ABCA1	hsa-miR-199a-5p
ABCA1	hsa-miR-200c-3p
ABCA1	hsa-miR-26a-5p
ABCA1	hsa-miR-3614-5p
ABCA10	hsa-miR-33a-3p
ABCA10	hsa-miR-374a-3p
ABCA10	hsa-miR-548d-3p
ABCA12	hsa-miR-1262
ABCA12	hsa-miR-15b-5p
ABCA12	hsa-miR-20b-3p
ABCA12	hsa-miR-21-3p
ABCA12	hsa-miR-214-5p
ABCA12	hsa-miR-3157-5p
ABCA13	hsa-miR-24-3p
ABCA13	hsa-miR-28-5p
ABCA13	hsa-miR-3607-5p
ABCA13	hsa-miR-500b
ABCA13	hsa-miR-550a-5p
ABCA13	hsa-miR-636
ABCA13	hsa-miR-7-5p
ABCA2	hsa-miR-330-3p
ABCA2	hsa-miR-3910
ABCA2	hsa-miR-506-3p
ABCA5	hsa-miR-1237
ABCA5	hsa-miR-19a-3p
ABCA5	hsa-miR-3200-5p
ABCA5	hsa-miR-452-3p
ABCA5	hsa-miR-580
ABCA8	hsa-miR-154-3p
ABCA8	hsa-miR-487a
ABCA8	hsa-miR-589-3p
ABCA9	hsa-miR-105-5p
ABCA9	hsa-miR-1185-5p
ABCA9	hsa-miR-3605-5p
ABCA9	hsa-miR-3910
ABCB1	hsa-miR-338-5p
ABCB1	hsa-miR-455-3p
ABCB10	hsa-miR-19a-5p
ABCB10	hsa-miR-19b-1-5p
ABCB10	hsa-miR-335-3p
ABCB10	hsa-miR-548e
ABCB10	hsa-miR-548f
ABCB5	hsa-miR-130a-3p
ABCB5	hsa-miR-130b-3p
ABCB5	hsa-miR-218-1-3p
ABCB5	hsa-miR-454-3p
ABCB5	hsa-miR-488-5p
ABCB5	hsa-miR-577
ABCB6	hsa-miR-29a-3p
ABCB6	hsa-miR-29b-3p
ABCB6	hsa-miR-29c-3p
ABCB6	hsa-miR-767-5p
ABCB9	hsa-let-7c
ABCB9	hsa-let-7d-5p
ABCB9	hsa-miR-221-5p
ABCB9	hsa-miR-24-3p
ABCB9	hsa-miR-27a-3p
ABCB9	hsa-miR-27b-3p
ABCB9	hsa-miR-98
ABCC1	hsa-miR-224-5p
ABCC1	hsa-miR-34b-5p
ABCC1	hsa-miR-3613-3p
ABCC1	hsa-miR-520d-5p
ABCC10	hsa-let-7b-5p
ABCC10	hsa-let-7c
ABCC10	hsa-let-7e-5p
ABCC10	hsa-let-7f-5p
ABCC10	hsa-miR-374a-3p
ABCC10	hsa-miR-655
ABCC10	hsa-miR-98
ABCC11	hsa-miR-2115-5p
ABCC11	hsa-miR-3163
ABCC12	hsa-miR-1269a
ABCC12	hsa-miR-197-3p
ABCC12	hsa-miR-30b-3p
ABCC12	hsa-miR-338-3p
ABCC12	hsa-miR-34c-5p
ABCC12	hsa-miR-508-5p
ABCC12	hsa-miR-548t-5p
ABCC12	hsa-miR-616-3p
ABCC3	hsa-miR-18b-5p
ABCC3	hsa-miR-338-3p
ABCC3	hsa-miR-3622a-3p
ABCC4	hsa-miR-128
ABCC4	hsa-miR-1297
ABCC4	hsa-miR-27a-3p
ABCC4	hsa-miR-27b-3p
ABCC4	hsa-miR-299-5p
ABCC4	hsa-miR-3130-3p
ABCC4	hsa-miR-532-5p
ABCC4	hsa-miR-676-5p
ABCC4	hsa-miR-744-3p
ABCC5	hsa-let-7g-3p
ABCC5	hsa-miR-122-3p
ABCC5	hsa-miR-18a-5p
ABCC5	hsa-miR-26a-5p
ABCC5	hsa-miR-339-3p
ABCC5	hsa-miR-3943
ABCC5	hsa-miR-449b-5p
ABCC5	hsa-miR-502-5p
ABCC5	hsa-miR-520a-5p
ABCC8	hsa-miR-1258
ABCC8	hsa-miR-140-5p
ABCC8	hsa-miR-19b-1-5p
ABCC8	hsa-miR-223-5p
ABCC8	hsa-miR-3680-3p
ABCC8	hsa-miR-3919
ABCC8	hsa-miR-582-5p
ABCC9	hsa-miR-19a-3p
ABCC9	hsa-miR-217
ABCC9	hsa-miR-3607-3p
ABCC9	hsa-miR-452-5p
ABCD1	hsa-miR-1248
ABCD1	hsa-miR-9-5p
ABCD1	hsa-miR-96-5p
ABCD2	hsa-miR-155-5p
ABCD2	hsa-miR-223-5p
ABCD2	hsa-miR-3614-5p
ABCD2	hsa-miR-431-5p
ABCD3	hsa-miR-126-5p
ABCD3	hsa-miR-135b-5p
ABCD3	hsa-miR-152
ABCD3	hsa-miR-19a-3p
ABCD3	hsa-miR-22-5p
ABCD3	hsa-miR-374a-5p
ABCD3	hsa-miR-515-3p
ABCD3	hsa-miR-576-5p
ABCD3	hsa-miR-582-5p
ABCE1	hsa-miR-105-5p
ABCE1	hsa-miR-1297
ABCE1	hsa-miR-135a-5p
ABCE1	hsa-miR-193b-5p
ABCE1	hsa-miR-203
ABCE1	hsa-miR-29c-3p
ABCE1	hsa-miR-3613-3p
ABCE1	hsa-miR-548t-5p
ABCF2	hsa-miR-130b-5p
ABCF2	hsa-miR-16-5p
ABCF2	hsa-miR-222-5p
ABCF2	hsa-miR-378a-3p
ABCF2	hsa-miR-503
ABCF2	hsa-miR-548e
ABCF2	hsa-miR-548x-3p
ABCF2	hsa-miR-636
ABCF2	hsa-miR-767-3p
ABCF3	hsa-miR-15b-5p
ABCF3	hsa-miR-16-5p
ABCF3	hsa-miR-195-5p
ABCF3	hsa-miR-224-5p
ABCG2	hsa-miR-103a-2-5p
ABCG2	hsa-miR-106a-5p
ABCG2	hsa-miR-1185-5p
ABCG2	hsa-miR-154-3p
ABCG2	hsa-miR-17-5p
ABCG2	hsa-miR-519d
ABCG2	hsa-miR-520a-3p
ABCG2	hsa-miR-520h
ABCG4	hsa-miR-106b-5p
ABCG4	hsa-miR-212-3p
ABCG4	hsa-miR-216a
ABCG4	hsa-miR-223-3p
ABCG4	hsa-miR-25-3p
ABCG4	hsa-miR-302c-3p
ABCG4	hsa-miR-92a-3p
ABCG4	hsa-miR-9-5p
ABCG5	hsa-miR-192-5p
ABCG5	hsa-miR-3200-3p
ABCG8	hsa-miR-1227
ABCG8	hsa-miR-132-5p
ABCG8	hsa-miR-181a-2-3p
ABCG8	hsa-miR-20a-3p
ABCG8	hsa-miR-509-5p
ABCG8	hsa-miR-511
ABHD10	hsa-miR-1248
ABHD10	hsa-miR-369-3p
ABHD10	hsa-miR-491-3p
ABHD10	hsa-miR-499a-3p
ABHD10	hsa-miR-607
ABHD12	hsa-miR-135b-3p
ABHD12	hsa-miR-216a
ABHD12	hsa-miR-26a-5p
ABHD12	hsa-miR-30e-3p
ABHD12B	hsa-miR-499a-3p
ABHD12B	hsa-miR-765
ABHD13	hsa-miR-153
ABHD13	hsa-miR-223-3p
ABHD13	hsa-miR-25-3p
ABHD13	hsa-miR-33a-5p
ABHD13	hsa-miR-340-5p
ABHD13	hsa-miR-3662
ABHD13	hsa-miR-539-5p
ABHD13	hsa-miR-607
ABHD13	hsa-miR-668
ABHD13	hsa-miR-92a-3p
ABHD14B	hsa-miR-20a-3p
ABHD14B	hsa-miR-223-3p
ABHD14B	hsa-miR-25-3p
ABHD14B	hsa-miR-576-5p
ABHD15	hsa-miR-1304-5p
ABHD15	hsa-miR-135a-5p
ABHD15	hsa-miR-135b-5p
ABHD16A	hsa-miR-126-5p
ABHD16A	hsa-miR-135a-5p
ABHD16A	hsa-miR-26b-5p
ABHD16A	hsa-miR-380-3p
ABHD16A	hsa-miR-411-5p
ABHD16A	hsa-miR-944
ABHD2	hsa-miR-1
ABHD2	hsa-miR-106a-5p
ABHD2	hsa-miR-181a-3p
ABHD2	hsa-miR-301a-3p
ABHD2	hsa-miR-30a-5p
ABHD2	hsa-miR-30c-5p
ABHD2	hsa-miR-584-5p
ABHD2	hsa-miR-616-5p
ABHD2	hsa-miR-708-3p
ABHD3	hsa-let-7a-2-3p
ABHD3	hsa-miR-10a-5p
ABHD3	hsa-miR-129-5p
ABHD3	hsa-miR-130a-3p
ABHD3	hsa-miR-187-5p
ABHD3	hsa-miR-221-3p
ABHD3	hsa-miR-378c
ABHD3	hsa-miR-382-5p
ABHD3	hsa-miR-425-3p
ABHD3	hsa-miR-520c-3p
ABHD4	hsa-miR-130a-3p
ABHD4	hsa-miR-199b-3p
ABHD4	hsa-miR-222-5p
ABHD4	hsa-miR-3065-3p
ABHD4	hsa-miR-378a-3p
ABHD4	hsa-miR-3928
ABHD4	hsa-miR-454-3p
ABHD4	hsa-miR-505-5p
ABHD4	hsa-miR-664-5p
ABHD5	hsa-miR-140-5p
ABHD5	hsa-miR-19a-3p
ABHD5	hsa-miR-19b-3p
ABHD5	hsa-miR-29a-3p
ABHD5	hsa-miR-29c-3p
ABHD5	hsa-miR-3074-3p
ABHD5	hsa-miR-548q
ABHD6	hsa-miR-125a-5p
ABHD6	hsa-miR-191-5p
ABHD6	hsa-miR-3200-5p
ABHD6	hsa-miR-432-5p
ABHD6	hsa-miR-449a
ABHD6	hsa-miR-486-3p
ABHD6	hsa-miR-500a-5p
ABHD6	hsa-miR-584-5p
ABHD6	hsa-miR-664-3p
ABHD8	hsa-let-7a-2-3p
ABHD8	hsa-let-7g-3p
ABHD8	hsa-miR-143-3p
ABHD8	hsa-miR-7-5p
ABI1	hsa-miR-181d
ABI1	hsa-miR-188-3p
ABI1	hsa-miR-208b
ABI1	hsa-miR-2114-5p
ABI1	hsa-miR-29c-3p
ABI1	hsa-miR-3619-5p
ABI1	hsa-miR-3679-3p
ABI1	hsa-miR-641
ABI2	hsa-miR-106b-5p
ABI2	hsa-miR-148a-5p
ABI2	hsa-miR-183-5p
ABI2	hsa-miR-193a-3p
ABI2	hsa-miR-195-5p
ABI2	hsa-miR-362-5p
ABI2	hsa-miR-429
ABI2	hsa-miR-7-5p
ABI3	hsa-miR-16-5p
ABI3	hsa-miR-195-5p
ABI3	hsa-miR-3619-5p
ABI3	hsa-miR-424-5p
ABI3	hsa-miR-615-5p
ABI3BP	hsa-let-7a-3p
ABI3BP	hsa-let-7b-3p
ABI3BP	hsa-let-7f-1-3p
ABI3BP	hsa-miR-30a-5p
ABI3BP	hsa-miR-541-3p
ABI3BP	hsa-miR-654-5p
ABI3BP	hsa-miR-664-3p
ABL1	hsa-miR-148a-3p
ABL1	hsa-miR-190a
ABL1	hsa-miR-224-3p
ABL1	hsa-miR-29a-5p
ABL1	hsa-miR-31-3p
ABL1	hsa-miR-3654
ABL1	hsa-miR-548d-3p
ABL1	hsa-miR-873-5p
ABL2	hsa-let-7i-5p
ABL2	hsa-miR-107
ABL2	hsa-miR-137
ABL2	hsa-miR-16-5p
ABL2	hsa-miR-26a-5p
ABL2	hsa-miR-26b-5p
ABL2	hsa-miR-363-3p
ABL2	hsa-miR-4306
ABL2	hsa-miR-93-5p
ABLIM2	hsa-miR-135b-3p
ABLIM2	hsa-miR-3605-5p
ABLIM2	hsa-miR-548d-3p
ABLIM3	hsa-miR-129-1-3p
ABLIM3	hsa-miR-186-5p
ABLIM3	hsa-miR-190b
ABLIM3	hsa-miR-30a-3p
ABLIM3	hsa-miR-3150b-3p
ABLIM3	hsa-miR-338-3p
ABLIM3	hsa-miR-449b-5p
ABLIM3	hsa-miR-455-5p
ABLIM3	hsa-miR-549
ABLIM3	hsa-miR-7-1-3p
ABR	hsa-miR-132-5p
ABR	hsa-miR-19a-3p
ABR	hsa-miR-19a-5p
ABR	hsa-miR-19b-1-5p
ABR	hsa-miR-224-5p
ABR	hsa-miR-299-5p
ABR	hsa-miR-31-5p
ABR	hsa-miR-369-3p
ABR	hsa-miR-374a-5p
ABR	hsa-miR-374b-5p
ABRACL	hsa-miR-105-5p
ABRACL	hsa-miR-148a-5p
ABRACL	hsa-miR-3168
ABRACL	hsa-miR-378a-5p
ABRACL	hsa-miR-520d-5p
ABRACL	hsa-miR-539-5p
ABRACL	hsa-miR-556-3p
ABRACL	hsa-miR-944
ABT1	hsa-let-7f-5p
ABT1	hsa-let-7g-5p
ABT1	hsa-let-7i-5p
ABT1	hsa-miR-98
ABTB1	hsa-miR-125a-5p
ABTB1	hsa-miR-137
ABTB1	hsa-miR-744-3p
ABTB2	hsa-let-7a-2-3p
ABTB2	hsa-let-7g-3p
ABTB2	hsa-miR-154-3p
ABTB2	hsa-miR-338-5p
ABTB2	hsa-miR-549
ABTB2	hsa-miR-577
ABTB2	hsa-miR-589-5p
ACAA2	hsa-miR-124-3p
ACAA2	hsa-miR-196a-3p
ACAA2	hsa-miR-31-5p
ACAA2	hsa-miR-506-3p
ACACA	hsa-miR-15b-5p
ACACA	hsa-miR-16-5p
ACACA	hsa-miR-200b-3p
ACACA	hsa-miR-29a-3p
ACACA	hsa-miR-29b-3p
ACACA	hsa-miR-3065-3p
ACACA	hsa-miR-421
ACACA	hsa-miR-512-3p
ACACA	hsa-miR-767-5p
ACACB	hsa-miR-128
ACACB	hsa-miR-1293
ACACB	hsa-miR-452-5p
ACAN	hsa-miR-142-5p
ACAN	hsa-miR-18a-5p
ACAN	hsa-miR-24-3p
ACAN	hsa-miR-511
ACAN	hsa-miR-516a-5p
ACAN	hsa-miR-519a-5p
ACAP2	hsa-miR-105-5p
ACAP2	hsa-miR-181c-5p
ACAP2	hsa-miR-27a-3p
ACAP2	hsa-miR-28-3p
ACAP2	hsa-miR-3910
ACAP2	hsa-miR-519c-3p
ACAP2	hsa-miR-590-3p
ACAP2	hsa-miR-758
ACAP2	hsa-miR-96-5p
ACAP3	hsa-let-7d-5p
ACAP3	hsa-let-7f-5p
ACAP3	hsa-miR-1294
ACAP3	hsa-miR-153
ACAP3	hsa-miR-22-5p
ACAP3	hsa-miR-758
ACAP3	hsa-miR-98
ACAT2	hsa-miR-1269a
ACAT2	hsa-miR-509-3p
ACAT2	hsa-miR-548b-5p
ACAT2	hsa-miR-548k
ACBD3	hsa-miR-101-3p
ACBD3	hsa-miR-16-1-3p
ACBD3	hsa-miR-222-5p
ACBD3	hsa-miR-3128
ACBD3	hsa-miR-33b-3p
ACBD3	hsa-miR-34a-5p
ACBD3	hsa-miR-421
ACBD3	hsa-miR-512-3p
ACBD3	hsa-miR-548t-5p
ACBD3	hsa-miR-550a-5p
ACBD4	hsa-miR-22-5p
ACBD4	hsa-miR-3606
ACBD5	hsa-miR-130a-3p
ACBD5	hsa-miR-199a-3p
ACBD5	hsa-miR-301a-3p
ACBD5	hsa-miR-30c-5p
ACBD5	hsa-miR-30e-5p
ACBD5	hsa-miR-3662
ACBD5	hsa-miR-454-3p
ACBD5	hsa-miR-545-3p
ACBD5	hsa-miR-935
ACBD6	hsa-miR-323b-3p
ACBD6	hsa-miR-3926
ACBD6	hsa-miR-505-3p
ACBD6	hsa-miR-548s
ACBD6	hsa-miR-584-5p
ACBD7	hsa-miR-135b-5p
ACBD7	hsa-miR-455-5p
ACD	hsa-miR-1976
ACD	hsa-miR-3648
ACD	hsa-miR-548x-3p
ACE2	hsa-miR-3143
ACE2	hsa-miR-3187-3p
ACE2	hsa-miR-502-5p
ACE2	hsa-miR-511
ACER2	hsa-let-7a-5p
ACER2	hsa-let-7d-5p
ACER2	hsa-let-7g-5p
ACER2	hsa-miR-125a-5p
ACER2	hsa-miR-125b-5p
ACER2	hsa-miR-16-1-3p
ACER2	hsa-miR-196a-5p
ACER2	hsa-miR-544b
ACER2	hsa-miR-98
ACER3	hsa-miR-1304-5p
ACER3	hsa-miR-20a-3p
ACER3	hsa-miR-98
ACHE	hsa-miR-140-5p
ACHE	hsa-miR-142-3p
ACHE	hsa-miR-152
ACHE	hsa-miR-199a-5p
ACHE	hsa-miR-212-3p
ACHE	hsa-miR-3917
ACHE	hsa-miR-503
ACHE	hsa-miR-509-3p
ACHE	hsa-miR-766-3p
ACHE	hsa-miR-767-5p
ACIN1	hsa-miR-148b-5p
ACIN1	hsa-miR-18a-5p
ACIN1	hsa-miR-224-5p
ACIN1	hsa-miR-320c
ACIN1	hsa-miR-3654
ACIN1	hsa-miR-376a-3p
ACIN1	hsa-miR-625-5p
ACLY	hsa-miR-1253
ACLY	hsa-miR-127-5p
ACLY	hsa-miR-214-3p
ACLY	hsa-miR-369-3p
ACLY	hsa-miR-374b-5p
ACLY	hsa-miR-374c-5p
ACMSD	hsa-miR-32-3p
ACMSD	hsa-miR-651
ACN9	hsa-miR-129-5p
ACN9	hsa-miR-3680-3p
ACN9	hsa-miR-3934
ACO2	hsa-miR-203
ACO2	hsa-miR-3157-5p
ACO2	hsa-miR-3173-3p
ACO2	hsa-miR-34b-5p
ACO2	hsa-miR-500a-5p
ACO2	hsa-miR-502-5p
ACO2	hsa-miR-940
ACOT11	hsa-miR-1271-5p
ACOT11	hsa-miR-135b-3p
ACOT11	hsa-miR-196a-3p
ACOT11	hsa-miR-2355-3p
ACOT11	hsa-miR-3176
ACOT11	hsa-miR-581
ACOT11	hsa-miR-664-5p
ACOT13	hsa-miR-125b-5p
ACOT13	hsa-miR-1269a
ACOT13	hsa-miR-153
ACOT13	hsa-miR-19b-1-5p
ACOT13	hsa-miR-337-5p
ACOT13	hsa-miR-512-3p
ACOT7	hsa-miR-1
ACOT7	hsa-miR-21-3p
ACOT7	hsa-miR-3654
ACOT7	hsa-miR-3926
ACOT7	hsa-miR-497-5p
ACOT7	hsa-miR-625-5p
ACOT7	hsa-miR-9-3p
ACOX1	hsa-miR-130b-5p
ACOX1	hsa-miR-136-5p
ACOX1	hsa-miR-146a-3p
ACOX1	hsa-miR-222-5p
ACOX1	hsa-miR-32-5p
ACOX1	hsa-miR-363-3p
ACP1	hsa-miR-1294
ACP1	hsa-miR-19b-1-5p
ACP1	hsa-miR-34b-5p
ACP1	hsa-miR-431-5p
ACP1	hsa-miR-500a-5p
ACP1	hsa-miR-934
ACP2	hsa-miR-105-5p
ACP2	hsa-miR-130a-3p
ACP2	hsa-miR-15a-5p
ACP2	hsa-miR-195-3p
ACP2	hsa-miR-214-3p
ACP2	hsa-miR-365a-5p
ACPL2	hsa-miR-106a-5p
ACPL2	hsa-miR-106b-5p
ACPL2	hsa-miR-140-3p
ACPL2	hsa-miR-218-1-3p
ACPL2	hsa-miR-29a-3p
ACPL2	hsa-miR-29b-3p
ACPL2	hsa-miR-373-3p
ACPL2	hsa-miR-410
ACPL2	hsa-miR-520a-3p
ACPL2	hsa-miR-548e
ACPP	hsa-miR-10a-5p
ACPP	hsa-miR-1229
ACPP	hsa-miR-3605-5p
ACPP	hsa-miR-3652
ACRC	hsa-miR-1976
ACRC	hsa-miR-200b-3p
ACRC	hsa-miR-2114-5p
ACRC	hsa-miR-374a-5p
ACRC	hsa-miR-374b-5p
ACRC	hsa-miR-429
ACSBG1	hsa-miR-3661
ACSBG1	hsa-miR-520a-5p
ACSBG1	hsa-miR-525-5p
ACSL1	hsa-miR-181a-5p
ACSL1	hsa-miR-181d
ACSL1	hsa-miR-190b
ACSL1	hsa-miR-224-3p
ACSL1	hsa-miR-30a-5p
ACSL1	hsa-miR-340-5p
ACSL1	hsa-miR-424-5p
ACSL3	hsa-miR-1301
ACSL3	hsa-miR-142-5p
ACSL3	hsa-miR-188-5p
ACSL3	hsa-miR-200c-5p
ACSL3	hsa-miR-203
ACSL3	hsa-miR-2115-5p
ACSL3	hsa-miR-26a-5p
ACSL3	hsa-miR-616-5p
ACSL3	hsa-miR-642a-5p
ACSL3	hsa-miR-935
ACSL4	hsa-miR-130a-3p
ACSL4	hsa-miR-130b-3p
ACSL4	hsa-miR-142-3p
ACSL4	hsa-miR-195-5p
ACSL4	hsa-miR-424-5p
ACSL4	hsa-miR-584-5p
ACSL4	hsa-miR-934
ACSL5	hsa-miR-135b-5p
ACSL5	hsa-miR-195-5p
ACSL5	hsa-miR-2115-5p
ACSL5	hsa-miR-214-3p
ACSL5	hsa-miR-222-5p
ACSL5	hsa-miR-340-3p
ACSL5	hsa-miR-3654
ACSL6	hsa-let-7f-5p
ACSL6	hsa-miR-137
ACSL6	hsa-miR-140-5p
ACSL6	hsa-miR-195-3p
ACSL6	hsa-miR-196a-5p
ACSL6	hsa-miR-196b-5p
ACSL6	hsa-miR-30d-3p
ACSL6	hsa-miR-526b-5p
ACSL6	hsa-miR-98
ACSM2A	hsa-miR-1237
ACSM2A	hsa-miR-34c-5p
ACSS2	hsa-miR-1912
ACSS2	hsa-miR-3128
ACSS2	hsa-miR-513a-5p
ACSS3	hsa-miR-29b-2-5p
ACSS3	hsa-miR-502-5p
ACTA1	hsa-let-7b-5p
ACTA1	hsa-let-7c
ACTA1	hsa-let-7f-5p
ACTA1	hsa-miR-103a-2-5p
ACTA1	hsa-miR-3662
ACTA1	hsa-miR-495
ACTA1	hsa-miR-544b
ACTA1	hsa-miR-676-5p
ACTA2	hsa-miR-128
ACTA2	hsa-miR-181b-5p
ACTA2	hsa-miR-181d
ACTA2	hsa-miR-27b-3p
ACTA2	hsa-miR-582-5p
ACTB	hsa-let-7a-2-3p
ACTB	hsa-miR-125a-3p
ACTB	hsa-miR-130a-3p
ACTB	hsa-miR-31-3p
ACTB	hsa-miR-3680-3p
ACTB	hsa-miR-450b-5p
ACTB	hsa-miR-625-5p
ACTB	hsa-miR-7-1-3p
ACTBL2	hsa-miR-188-3p
ACTBL2	hsa-miR-628-3p
ACTC1	hsa-miR-30b-5p
ACTC1	hsa-miR-30c-5p
ACTC1	hsa-miR-30d-5p
ACTC1	hsa-miR-330-3p
ACTC1	hsa-miR-340-5p
ACTC1	hsa-miR-3678-3p
ACTC1	hsa-miR-92a-3p
ACTG1	hsa-miR-190a
ACTG1	hsa-miR-190b
ACTG1	hsa-miR-191-3p
ACTG1	hsa-miR-199a-5p
ACTG1	hsa-miR-301a-3p
ACTG1	hsa-miR-3650
ACTG1	hsa-miR-454-3p
ACTG1	hsa-miR-512-3p
ACTG2	hsa-miR-135b-3p
ACTG2	hsa-miR-142-3p
ACTG2	hsa-miR-33a-3p
ACTL10	hsa-miR-17-3p
ACTL10	hsa-miR-34c-5p
ACTL10	hsa-miR-92a-1-5p
ACTL6A	hsa-let-7a-3p
ACTL6A	hsa-miR-1283
ACTL6A	hsa-miR-181a-2-3p
ACTL6A	hsa-miR-320c
ACTL6A	hsa-miR-3662
ACTL6A	hsa-miR-496
ACTL6A	hsa-miR-520c-3p
ACTL6A	hsa-miR-940
ACTL6A	hsa-miR-98
ACTL6B	hsa-miR-494
ACTL6B	hsa-miR-499a-3p
ACTL8	hsa-miR-2115-5p
ACTL8	hsa-miR-3913-5p
ACTL8	hsa-miR-577
ACTN1	hsa-miR-22-3p
ACTN1	hsa-miR-224-5p
ACTN1	hsa-miR-3065-5p
ACTN1	hsa-miR-3120-3p
ACTN1	hsa-miR-337-3p
ACTN1	hsa-miR-487a
ACTN1	hsa-miR-521
ACTN1	hsa-miR-590-3p
ACTN1	hsa-miR-877-3p
ACTN2	hsa-miR-1237
ACTN2	hsa-miR-130a-5p
ACTN2	hsa-miR-25-3p
ACTN2	hsa-miR-520h
ACTN2	hsa-miR-92a-3p
ACTN2	hsa-miR-9-5p
ACTN4	hsa-miR-129-5p
ACTN4	hsa-miR-148a-3p
ACTN4	hsa-miR-16-1-3p
ACTN4	hsa-miR-2278
ACTN4	hsa-miR-3680-3p
ACTN4	hsa-miR-369-3p
ACTN4	hsa-miR-410
ACTN4	hsa-miR-548a-5p
ACTN4	hsa-miR-9-5p
ACTR1A	hsa-miR-1285-3p
ACTR1A	hsa-miR-16-5p
ACTR1A	hsa-miR-195-5p
ACTR1A	hsa-miR-205-3p
ACTR1A	hsa-miR-30b-5p
ACTR1A	hsa-miR-375
ACTR1A	hsa-miR-424-5p
ACTR1A	hsa-miR-9-5p
ACTR1B	hsa-miR-556-3p
ACTR1B	hsa-miR-584-5p
ACTR1B	hsa-miR-625-3p
ACTR1B	hsa-miR-656
ACTR1B	hsa-miR-944
ACTR2	hsa-let-7g-5p
ACTR2	hsa-let-7i-5p
ACTR2	hsa-miR-181a-2-3p
ACTR2	hsa-miR-182-5p
ACTR2	hsa-miR-183-3p
ACTR2	hsa-miR-195-5p
ACTR2	hsa-miR-2355-5p
ACTR2	hsa-miR-3690
ACTR2	hsa-miR-495
ACTR3	hsa-miR-101-3p
ACTR3	hsa-miR-101-5p
ACTR3	hsa-miR-323a-3p
ACTR3	hsa-miR-34b-3p
ACTR3	hsa-miR-492
ACTR3	hsa-miR-642a-5p
ACTR3B	hsa-miR-135a-5p
ACTR3B	hsa-miR-135b-5p
ACTR3B	hsa-miR-15a-5p
ACTR3B	hsa-miR-15b-5p
ACTR3B	hsa-miR-16-5p
ACTR3B	hsa-miR-19b-3p
ACTR3B	hsa-miR-3613-5p
ACTR3B	hsa-miR-497-5p
ACTR3B	hsa-miR-503
ACTR8	hsa-miR-34c-5p
ACTR8	hsa-miR-449a
ACTR8	hsa-miR-449b-5p
ACTR8	hsa-miR-769-5p
ACTRT3	hsa-miR-1236
ACTRT3	hsa-miR-1248
ACTRT3	hsa-miR-146b-3p
ACVR1	hsa-miR-130a-3p
ACVR1	hsa-miR-140-5p
ACVR1	hsa-miR-181a-2-3p
ACVR1	hsa-miR-18a-5p
ACVR1	hsa-miR-30a-5p
ACVR1	hsa-miR-30b-5p
ACVR1	hsa-miR-337-3p
ACVR1	hsa-miR-381
ACVR1	hsa-miR-582-5p
ACVR1B	hsa-let-7f-5p
ACVR1B	hsa-miR-106b-5p
ACVR1B	hsa-miR-135b-5p
ACVR1B	hsa-miR-153
ACVR1B	hsa-miR-155-5p
ACVR1B	hsa-miR-24-3p
ACVR1B	hsa-miR-3136-5p
ACVR1B	hsa-miR-3609
ACVR1C	hsa-let-7c
ACVR1C	hsa-miR-135b-5p
ACVR1C	hsa-miR-335-3p
ACVR1C	hsa-miR-340-5p
ACVR1C	hsa-miR-381
ACVR1C	hsa-miR-497-3p
ACVR1C	hsa-miR-514a-3p
ACVR1C	hsa-miR-605
ACVR2A	hsa-miR-125b-2-3p
ACVR2A	hsa-miR-1301
ACVR2A	hsa-miR-130a-3p
ACVR2A	hsa-miR-130b-3p
ACVR2A	hsa-miR-16-5p
ACVR2A	hsa-miR-337-3p
ACVR2A	hsa-miR-588
ACVR2B	hsa-miR-181a-2-3p
ACVR2B	hsa-miR-22-5p
ACVR2B	hsa-miR-26a-2-3p
ACVR2B	hsa-miR-29b-1-5p
ACVR2B	hsa-miR-301a-3p
ACVR2B	hsa-miR-3942-5p
ACVR2B	hsa-miR-548o-3p
ACVR2B	hsa-miR-592
ACVR2B	hsa-miR-7-1-3p
ACYP1	hsa-miR-106a-3p
ACYP1	hsa-miR-1915-5p
ACYP1	hsa-miR-31-3p
ACYP1	hsa-miR-378a-3p
ACYP1	hsa-miR-432-5p
ACYP1	hsa-miR-505-5p
ACYP1	hsa-miR-573
ACYP1	hsa-miR-92a-3p
ACYP1	hsa-miR-92b-3p
ADAD1	hsa-miR-329
ADAD1	hsa-miR-362-3p
ADAD1	hsa-miR-548o-3p
ADAL	hsa-miR-1224-3p
ADAL	hsa-miR-1269a
ADAL	hsa-miR-31-3p
ADAM10	hsa-miR-195-5p
ADAM10	hsa-miR-26b-3p
ADAM10	hsa-miR-33a-5p
ADAM10	hsa-miR-3605-5p
ADAM10	hsa-miR-369-3p
ADAM10	hsa-miR-409-3p
ADAM11	hsa-miR-125b-5p
ADAM11	hsa-miR-181c-5p
ADAM11	hsa-miR-181d
ADAM11	hsa-miR-22-3p
ADAM11	hsa-miR-34a-3p
ADAM11	hsa-miR-3607-3p
ADAM11	hsa-miR-9-5p
ADAM12	hsa-miR-130a-3p
ADAM12	hsa-miR-19b-3p
ADAM12	hsa-miR-29c-3p
ADAM12	hsa-miR-32-3p
ADAM12	hsa-miR-411-5p
ADAM12	hsa-miR-454-3p
ADAM12	hsa-miR-501-3p
ADAM15	hsa-let-7b-5p
ADAM15	hsa-let-7d-5p
ADAM15	hsa-let-7e-5p
ADAM15	hsa-let-7f-5p
ADAM15	hsa-let-7g-5p
ADAM15	hsa-miR-3927
ADAM15	hsa-miR-98
ADAM17	hsa-miR-1180
ADAM17	hsa-miR-135b-3p
ADAM17	hsa-miR-140-3p
ADAM17	hsa-miR-148a-3p
ADAM17	hsa-miR-224-5p
ADAM17	hsa-miR-452-5p
ADAM17	hsa-miR-500a-3p
ADAM17	hsa-miR-512-3p
ADAM17	hsa-miR-616-5p
ADAM19	hsa-miR-130a-5p
ADAM19	hsa-miR-155-5p
ADAM19	hsa-miR-23a-3p
ADAM19	hsa-miR-26b-5p
ADAM19	hsa-miR-30e-5p
ADAM22	hsa-miR-148a-5p
ADAM22	hsa-miR-148b-5p
ADAM22	hsa-miR-222-3p
ADAM22	hsa-miR-3139
ADAM22	hsa-miR-3148
ADAM22	hsa-miR-330-3p
ADAM22	hsa-miR-383
ADAM22	hsa-miR-514a-3p
ADAM22	hsa-miR-582-5p
ADAM22	hsa-miR-632
ADAM23	hsa-miR-103a-2-5p
ADAM23	hsa-miR-145-3p
ADAM23	hsa-miR-205-5p
ADAM23	hsa-miR-223-5p
ADAM23	hsa-miR-25-3p
ADAM23	hsa-miR-32-5p
ADAM23	hsa-miR-337-3p
ADAM23	hsa-miR-33a-5p
ADAM28	hsa-miR-1248
ADAM28	hsa-miR-491-3p
ADAM29	hsa-miR-3140-3p
ADAM29	hsa-miR-377-5p
ADAM9	hsa-miR-106b-5p
ADAM9	hsa-miR-125a-5p
ADAM9	hsa-miR-125b-5p
ADAM9	hsa-miR-30a-5p
ADAM9	hsa-miR-338-3p
ADAM9	hsa-miR-342-3p
ADAM9	hsa-miR-550a-5p
ADAM9	hsa-miR-570-3p
ADAM9	hsa-miR-580
ADAM9	hsa-miR-93-5p
ADAMDEC1	hsa-miR-1269a
ADAMDEC1	hsa-miR-221-5p
ADAMDEC1	hsa-miR-3690
ADAMDEC1	hsa-miR-378a-3p
ADAMDEC1	hsa-miR-517b-3p
ADAMTS1	hsa-miR-1
ADAMTS1	hsa-miR-1226-3p
ADAMTS1	hsa-miR-1277-3p
ADAMTS1	hsa-miR-196b-5p
ADAMTS1	hsa-miR-335-3p
ADAMTS1	hsa-miR-340-5p
ADAMTS1	hsa-miR-548y
ADAMTS1	hsa-miR-625-3p
ADAMTS10	hsa-miR-101-3p
ADAMTS10	hsa-miR-186-5p
ADAMTS10	hsa-miR-27a-3p
ADAMTS10	hsa-miR-27b-3p
ADAMTS10	hsa-miR-29c-3p
ADAMTS10	hsa-miR-378b
ADAMTS10	hsa-miR-508-3p
ADAMTS14	hsa-miR-3646
ADAMTS14	hsa-miR-3662
ADAMTS15	hsa-let-7a-5p
ADAMTS15	hsa-let-7b-5p
ADAMTS15	hsa-let-7d-5p
ADAMTS15	hsa-let-7f-5p
ADAMTS15	hsa-let-7g-5p
ADAMTS15	hsa-miR-148a-3p
ADAMTS15	hsa-miR-148b-3p
ADAMTS15	hsa-miR-152
ADAMTS16	hsa-miR-340-5p
ADAMTS16	hsa-miR-548a-3p
ADAMTS16	hsa-miR-548e
ADAMTS17	hsa-miR-101-3p
ADAMTS17	hsa-miR-136-3p
ADAMTS17	hsa-miR-20a-5p
ADAMTS17	hsa-miR-2115-5p
ADAMTS17	hsa-miR-24-1-5p
ADAMTS17	hsa-miR-29c-3p
ADAMTS17	hsa-miR-3126-5p
ADAMTS17	hsa-miR-487b
ADAMTS18	hsa-miR-1224-5p
ADAMTS18	hsa-miR-130a-3p
ADAMTS18	hsa-miR-137
ADAMTS18	hsa-miR-148a-3p
ADAMTS18	hsa-miR-16-5p
ADAMTS18	hsa-miR-3919
ADAMTS18	hsa-miR-411-3p
ADAMTS18	hsa-miR-664-5p
ADAMTS19	hsa-miR-103a-3p
ADAMTS19	hsa-miR-15b-3p
ADAMTS19	hsa-miR-214-3p
ADAMTS19	hsa-miR-301a-3p
ADAMTS19	hsa-miR-3074-3p
ADAMTS19	hsa-miR-374a-5p
ADAMTS19	hsa-miR-551b-5p
ADAMTS19	hsa-miR-581
ADAMTS19	hsa-miR-582-5p
ADAMTS19	hsa-miR-887
ADAMTS2	hsa-miR-29a-3p
ADAMTS2	hsa-miR-29b-3p
ADAMTS2	hsa-miR-767-5p
ADAMTS3	hsa-let-7f-2-3p
ADAMTS3	hsa-miR-1263
ADAMTS3	hsa-miR-130a-3p
ADAMTS3	hsa-miR-16-1-3p
ADAMTS3	hsa-miR-190b
ADAMTS3	hsa-miR-25-3p
ADAMTS3	hsa-miR-32-5p
ADAMTS3	hsa-miR-3921
ADAMTS3	hsa-miR-92b-3p
ADAMTS4	hsa-miR-125a-5p
ADAMTS4	hsa-miR-125b-5p
ADAMTS4	hsa-miR-148b-5p
ADAMTS4	hsa-miR-3168
ADAMTS4	hsa-miR-3609
ADAMTS4	hsa-miR-3659
ADAMTS4	hsa-miR-548q
ADAMTS4	hsa-miR-548t-5p
ADAMTS5	hsa-let-7c
ADAMTS5	hsa-miR-106b-5p
ADAMTS5	hsa-miR-148a-5p
ADAMTS5	hsa-miR-16-5p
ADAMTS5	hsa-miR-197-3p
ADAMTS5	hsa-miR-2278
ADAMTS5	hsa-miR-29c-3p
ADAMTS5	hsa-miR-452-5p
ADAMTS5	hsa-miR-520d-5p
ADAMTS5	hsa-miR-93-5p
ADAMTS6	hsa-miR-1248
ADAMTS6	hsa-miR-130a-5p
ADAMTS6	hsa-miR-136-5p
ADAMTS6	hsa-miR-16-5p
ADAMTS6	hsa-miR-24-2-5p
ADAMTS6	hsa-miR-30e-5p
ADAMTS6	hsa-miR-31-5p
ADAMTS6	hsa-miR-339-5p
ADAMTS6	hsa-miR-505-3p
ADAMTS6	hsa-miR-548k
ADAMTS7	hsa-miR-2355-5p
ADAMTS7	hsa-miR-29b-3p
ADAMTS7	hsa-miR-29c-3p
ADAMTS7	hsa-miR-548b-3p
ADAMTS7	hsa-miR-767-5p
ADAMTS8	hsa-let-7a-5p
ADAMTS8	hsa-let-7b-5p
ADAMTS8	hsa-let-7e-5p
ADAMTS8	hsa-miR-143-5p
ADAMTS8	hsa-miR-153
ADAMTS8	hsa-miR-196a-5p
ADAMTS8	hsa-miR-23b-3p
ADAMTS8	hsa-miR-487a
ADAMTS8	hsa-miR-521
ADAMTS9	hsa-let-7c
ADAMTS9	hsa-miR-135b-3p
ADAMTS9	hsa-miR-18a-5p
ADAMTS9	hsa-miR-223-3p
ADAMTS9	hsa-miR-29c-3p
ADAMTS9	hsa-miR-330-3p
ADAMTS9	hsa-miR-33b-5p
ADAMTS9	hsa-miR-519a-5p
ADAMTS9	hsa-miR-651
ADAMTS9	hsa-miR-98
ADAMTSL1	hsa-let-7a-2-3p
ADAMTSL1	hsa-miR-106a-5p
ADAMTSL1	hsa-miR-126-5p
ADAMTSL1	hsa-miR-181a-5p
ADAMTSL1	hsa-miR-374a-5p
ADAMTSL1	hsa-miR-493-5p
ADAMTSL1	hsa-miR-495
ADAMTSL1	hsa-miR-93-3p
ADAMTSL3	hsa-miR-15a-5p
ADAMTSL3	hsa-miR-183-3p
ADAMTSL3	hsa-miR-19a-3p
ADAMTSL3	hsa-miR-27a-3p
ADAMTSL3	hsa-miR-27b-3p
ADAMTSL3	hsa-miR-32-5p
ADAMTSL3	hsa-miR-500a-3p
ADAMTSL3	hsa-miR-92a-3p
ADAMTSL4	hsa-miR-148b-5p
ADAMTSL4	hsa-miR-224-5p
ADAR	hsa-miR-135a-5p
ADAR	hsa-miR-135b-5p
ADAR	hsa-miR-186-3p
ADAR	hsa-miR-3607-5p
ADAR	hsa-miR-362-3p
ADAR	hsa-miR-425-5p
ADARB1	hsa-miR-181a-5p
ADARB1	hsa-miR-181c-5p
ADARB1	hsa-miR-181d
ADARB1	hsa-miR-199a-3p
ADARB1	hsa-miR-199b-3p
ADARB1	hsa-miR-340-5p
ADARB2	hsa-miR-135a-5p
ADARB2	hsa-miR-135b-5p
ADAT2	hsa-miR-106a-5p
ADAT2	hsa-miR-17-5p
ADAT2	hsa-miR-197-3p
ADAT2	hsa-miR-20b-5p
ADAT2	hsa-miR-3065-5p
ADAT2	hsa-miR-411-3p
ADAT2	hsa-miR-588
ADC	hsa-miR-141-3p
ADC	hsa-miR-183-3p
ADC	hsa-miR-188-5p
ADC	hsa-miR-19b-1-5p
ADC	hsa-miR-200a-3p
ADC	hsa-miR-378a-3p
ADC	hsa-miR-3926
ADC	hsa-miR-409-3p
ADC	hsa-miR-4280
ADCK3	hsa-miR-3151
ADCK3	hsa-miR-507
ADCY1	hsa-miR-1289
ADCY1	hsa-miR-135a-5p
ADCY1	hsa-miR-26b-5p
ADCY1	hsa-miR-3117-3p
ADCY1	hsa-miR-454-3p
ADCY1	hsa-miR-582-5p
ADCY2	hsa-miR-137
ADCY2	hsa-miR-148b-3p
ADCY2	hsa-miR-3653
ADCY2	hsa-miR-548f
ADCY2	hsa-miR-548o-3p
ADCY2	hsa-miR-582-3p
ADCY3	hsa-miR-132-3p
ADCY3	hsa-miR-214-3p
ADCY3	hsa-miR-3137
ADCY3	hsa-miR-3177-3p
ADCY3	hsa-miR-3186-5p
ADCY3	hsa-miR-320b
ADCY3	hsa-miR-335-5p
ADCY3	hsa-miR-488-3p
ADCY3	hsa-miR-548b-3p
ADCY3	hsa-miR-577
ADCY5	hsa-miR-1254
ADCY5	hsa-miR-221-5p
ADCY6	hsa-miR-204-5p
ADCY6	hsa-miR-24-3p
ADCY6	hsa-miR-323a-3p
ADCY6	hsa-miR-365a-3p
ADCY6	hsa-miR-3688-3p
ADCY6	hsa-miR-543
ADCY6	hsa-miR-875-3p
ADCY6	hsa-miR-9-5p
ADCY6	hsa-miR-96-5p
ADCY8	hsa-miR-3613-3p
ADCY8	hsa-miR-410
ADCY9	hsa-miR-103a-2-5p
ADCY9	hsa-miR-181a-5p
ADCY9	hsa-miR-18a-5p
ADCY9	hsa-miR-374a-5p
ADCY9	hsa-miR-374b-5p
ADCY9	hsa-miR-506-3p
ADCY9	hsa-miR-892a
ADCYAP1	hsa-miR-124-3p
ADCYAP1	hsa-miR-1262
ADCYAP1	hsa-miR-129-2-3p
ADCYAP1	hsa-miR-144-5p
ADCYAP1	hsa-miR-1912
ADCYAP1	hsa-miR-217
ADCYAP1	hsa-miR-3929
ADCYAP1	hsa-miR-550a-5p
ADCYAP1	hsa-miR-708-3p
ADD1	hsa-miR-130b-3p
ADD1	hsa-miR-186-5p
ADD1	hsa-miR-33b-5p
ADD1	hsa-miR-493-3p
ADD1	hsa-miR-519a-5p
ADD2	hsa-miR-129-5p
ADD2	hsa-miR-29a-5p
ADD2	hsa-miR-30e-3p
ADD2	hsa-miR-3126-3p
ADD2	hsa-miR-378b
ADD2	hsa-miR-3922-3p
ADD2	hsa-miR-484
ADD2	hsa-miR-676-3p
ADD2	hsa-miR-760
ADD2	hsa-miR-873-5p
ADD3	hsa-let-7b-5p
ADD3	hsa-miR-130b-3p
ADD3	hsa-miR-200a-3p
ADD3	hsa-miR-365a-3p
ADD3	hsa-miR-484
ADD3	hsa-miR-499a-3p
ADD3	hsa-miR-518f-5p
ADD3	hsa-miR-539-5p
ADGB	hsa-miR-34b-5p
ADGB	hsa-miR-449c-5p
ADGB	hsa-miR-539-5p
ADGB	hsa-miR-579
ADGB	hsa-miR-766-3p
ADH1B	hsa-miR-146a-3p
ADH1B	hsa-miR-548v
ADH4	hsa-miR-130a-5p
ADH4	hsa-miR-376c
ADH4	hsa-miR-548t-5p
ADH4	hsa-miR-940
ADH6	hsa-miR-105-5p
ADH6	hsa-miR-203
ADH6	hsa-miR-488-5p
ADI1	hsa-miR-34b-5p
ADI1	hsa-miR-3913-5p
ADIPOR1	hsa-miR-1269a
ADIPOR1	hsa-miR-221-3p
ADIPOR1	hsa-miR-26a-5p
ADIPOR1	hsa-miR-3664-5p
ADIPOR1	hsa-miR-378a-3p
ADIPOR1	hsa-miR-3942-5p
ADIPOR1	hsa-miR-455-3p
ADIPOR1	hsa-miR-574-5p
ADIPOR1	hsa-miR-9-3p
ADIPOR2	hsa-let-7a-3p
ADIPOR2	hsa-let-7c
ADIPOR2	hsa-let-7d-5p
ADIPOR2	hsa-let-7e-5p
ADIPOR2	hsa-let-7f-5p
ADIPOR2	hsa-miR-429
ADIPOR2	hsa-miR-452-5p
ADIPOR2	hsa-miR-520d-3p
ADIPOR2	hsa-miR-629-3p
ADIPOR2	hsa-miR-942
ADK	hsa-miR-1256
ADK	hsa-miR-1271-5p
ADK	hsa-miR-3662
ADK	hsa-miR-548y
ADK	hsa-miR-577
ADK	hsa-miR-944
ADK	hsa-miR-96-5p
ADM	hsa-miR-1248
ADM	hsa-miR-148a-5p
ADM	hsa-miR-20b-5p
ADM	hsa-miR-2277-3p
ADM	hsa-miR-24-3p
ADM	hsa-miR-26a-5p
ADM	hsa-miR-26b-5p
ADNP	hsa-miR-107
ADNP	hsa-miR-1267
ADNP	hsa-miR-151a-3p
ADNP	hsa-miR-200c-5p
ADNP	hsa-miR-221-3p
ADNP	hsa-miR-27a-3p
ADNP	hsa-miR-27b-5p
ADNP	hsa-miR-328
ADNP	hsa-miR-3652
ADNP	hsa-miR-449b-5p
ADNP2	hsa-miR-128
ADNP2	hsa-miR-3065-3p
ADNP2	hsa-miR-424-5p
ADNP2	hsa-miR-514a-3p
ADNP2	hsa-miR-517b-3p
[truncated: 71,411 more rows]
