# Supplementary material for: Cupid: simultaneous reconstruction of microRNA-target and ceRNA networks
Source: HighWire-hosted journal article supplement (doi:10.1101/gr.178194.114), 2014-11-05
Supplement: Table_S10.xlsx [file Table_S10.xlsx]

## Sheet: List of effectors
Transcriptio Factor	Perturbagen (96H)	Perturbagen (144H)
AATF	AARS	AARS
ABL1	AATF	AATF
ABT1	ABAT	ABAT
ABTB1	ABCA3	ABCA3
ADNP	ABCA5	ABCA5
ADNP2	ABCB6	ABCB6
AEBP1	ABCB7	ABCB7
AEBP2	ABCC1	ABCC1
AES	ABCC10	ABCC10
AFF1	ABCC3	ABCC3
AFF3	ABCC4	ABCC4
AFF4	ABCC5	ABCC5
AGAP3	ABCD3	ABCD3
AHCTF1	ABCF1	ABCF1
AHR	ABCF2	ABCF2
AIP	ABCF3	ABCF3
AIRE	ABCG2	ABCG2
AKNA	ABHD4	ABHD6
ALS2CR8	ABHD6	ABL1
ALX1	ABL1	ABL2
ALX3	ABL2	ACAA1
ALX4	ACAA1	ACADM
ANKRA2	ACADM	ACAT1
ANKRD1	ACAT1	ACAT2
ANKRD10	ACAT2	ACBD3
ANKRD2	ACBD3	ACD
ANKRD22	ACD	ACLY
ANKRD30A	ACLY	ACO2
ANKRD32	ACO2	ACOT9
ANKRD33	ACOT9	ACSL1
ANKRD42	ACSL1	ADA
ANKRD45	ADA	ADAM10
ANKRD49	ADAM10	ADAM15
ANKRD5	ADAM15	ADAR
ANKRD53	ADAR	ADAT1
ANKRD55	ADAT1	ADCK3
ANKRD6	ADCK3	ADCY9
ANKRD7	ADCY3	ADH5
ANKS1A	ADCY9	ADNP2
ANKS3	ADH5	ADO
ANKZF1	ADI1	ADRA2C
APBB1	ADNP2	ADRB2
APBB2	ADO	ADSS
APC	ADRA2C	AES
APEX1	ADRB2	AFF1
APP	ADSS	AGL
AR	AES	AHCY
ARGFX	AFF1	AIMP2
ARHGAP35	AFG3L2	AIRE
ARID1A	AGL	AK2
ARID1B	AHCY	AKAP1
ARID3A	AIMP2	AKAP11
ARID3B	AIRE	AKAP13
ARID4A	AK2	AKAP8
ARID4B	AKAP1	AKAP8L
ARID5B	AKAP11	AKAP9
ARNT	AKAP8	AKR1A1
ARNT2	AKAP8L	AKR1C1
ARNTL	AKAP9	AKR1C2
ARNTL2	AKR1A1	AKR1C3
ARX	AKR1C1	AKR7A2
ASB1	AKR1C2	AKT1
ASB10	AKR1C3	AKT2
ASB11	AKR7A2	ALAS1
ASB12	AKT1	ALDH18A1
ASB15	AKT2	ALDH1A3
ASB3	ALAS1	ALDH3A2
ASB4	ALDH18A1	ALDH3B2
ASB6	ALDH1A3	ALDH5A1
ASB8	ALDH3A2	ALDH6A1
ASB9	ALDH3B2	ALDH7A1
ASCC1	ALDH5A1	ALDH9A1
ASCC2	ALDH6A1	ALDOC
ASCC3	ALDH7A1	ALG9
ASCL1	ALDH9A1	ALK
ASCL2	ALDOC	ALMS1
ASCL3	ALG9	AMDHD2
ASCL4	ALK	AMIGO3
ASH1L	ALMS1	ANKRD10
ASH2L	AMDHD2	ANKRD55
ASXL1	ANKRD10	ANKZF1
ATAD2	ANKRD49	ANO10
ATF1	ANKRD55	ANXA1
ATF2	ANKZF1	ANXA5
ATF3	ANO10	ANXA7
ATF4	ANXA1	AP4S1
ATF5	ANXA5	APBB2
ATF6	ANXA7	APC
ATF6B	AP1B1	APPBP2
ATF7	AP4S1	AR
ATF7IP	APBB2	ARAF
ATM	APC	ARFIP2
ATOH1	APPBP2	ARG1
ATOH7	ARAF	ARHGAP1
ATOH8	ARFIP2	ARHGEF12
ATRX	ARG1	ARHGEF2
BACH1	ARHGAP1	ARHGEF5
BACH2	ARHGEF2	ARID4B
BARD1	ARHGEF5	ARID5B
BARHL1	ARID4B	ARL4C
BARHL2	ARID5B	ARNT
BARX1	ARL4C	ARNT2
BARX2	ARNT	ARPP19
BATF	ARNT2	ASCC3
BATF2	ARPP19	ASH2L
BATF3	ASAP2	ASL
BAZ1A	ASCC3	ASMTL
BAZ1B	ASH2L	ASNS
BAZ2A	ASL	ATF1
BAZ2B	ASMTL	ATF2
BBX	ASNS	ATF3
BCL11A	ATF1	ATF4
BCL11B	ATF2	ATF5
BCL3	ATF3	ATG16L1
BCL6	ATF4	ATG16L2
BCL6B	ATF5	ATG3
BCLAF1	ATG3	ATG5
BCOR	ATG5	ATG7
BDP1	ATIC	ATIC
BHLHA15	ATM	ATM
BHLHE22	ATMIN	ATMIN
BHLHE23	ATP11B	ATP1A1
BHLHE40	ATP1A1	ATP1A3
BHLHE41	ATP1A3	ATP1B1
BIN1	ATP1B1	ATP2C1
BLZF1	ATP2C1	ATP5D
BMI1	ATP5D	ATP5S
BMP2	ATP5S	ATP6V0B
BNC1	ATP6V0B	ATP6V1D
BNC2	ATP6V1D	ATP6V1F
BOLA1	ATP6V1F	ATR
BOLA2	ATR	AURKA
BPTF	AURKA	AURKAIP1
BRCA1	AURKAIP1	AURKB
BRCA2	AURKB	AXIN1
BRD1	AXIN1	B3GNT1
BRD7	B3GNT1	B4GALT1
BRD8	B4GALT1	B4GALT4
BRDT	B4GALT4	BACE2
BRF1	BACE2	BACH2
BRIP1	BAD	BAD
BRPF1	BAG1	BAG1
BRPF3	BAG3	BAMBI
BRWD1	BAG6	BAZ1B
BSX	BAMBI	BAZ2B
BTAF1	BAZ1B	BBS9
BTBD11	BAZ2B	BCAT2
BTF3	BBS9	BCKDHA
BTG1	BCAT2	BCL10
BTG2	BCKDHA	BCL2
BUD31	BCL10	BCL2L1
BZW1	BCL2	BCL2L13
C11orf9	BCL2L1	BCL2L2
C14orf43	BCL2L13	BCL3
C1D	BCL3	BCL6
C20orf151	BCL6	BCL7B
C21orf7	BCL7B	BCL9
CALCOCO1	BDH1	BCR
CAMTA1	BECN1	BDH1
CAMTA2	BHLHE40	BECN1
CARHSP1	BID	BHLHE40
CASZ1	BIRC5	BID
CBFA2T2	BLCAP	BIRC5
CBFA2T3	BLMH	BLCAP
CBFB	BLVRA	BLM
CBL	BLVRB	BLMH
CBX2	BMI1	BLVRA
CBX3	BMPR1A	BLVRB
CBX4	BNIP3	BMI1
CBX6	BPHL	BMPR1A
CBX7	BRAF	BNIP3
CBX8	BRCA1	BPHL
CC2D1A	BRCA2	BRAF
CCDC79	BRD2	BRCA1
CCRN4L	BRD3	BRCA2
CDC5L	BRD4	BRD2
CDX1	BRP44	BRD3
CDX2	BRPF1	BRD4
CDX4	BTBD3	BRP44
CEBPA	BTG1	BTBD3
CEBPB	BTG2	BTG1
CEBPD	BTG3	BTG2
CEBPE	BUB1	BTG3
CEBPG	BUB1B	BUB1
CEBPZ	BZW2	BUB1B
CELF3	C19orf10	BZW2
CENPB	C1orf106	C13orf31
CENPK	C2CD2	C19orf10
CGGBP1	C2CD2L	C1orf106
CHAF1A	C2orf3	C1QTNF6
CHD1	CA12	C2CD2
CHD2	CA2	C2CD2L
CHD4	CAB39	C2orf3
CHD5	CABIN1	CA12
CHD7	CACNA1C	CA2
CHD8	CALCOCO2	CABIN1
CHURC1	CALM1	CACNA1C
CIC	CALM2	CALCOCO2
CIITA	CALM3	CALM1
CIR1	CALR	CALM2
CITED1	CALU	CALM3
CITED2	CAMSAP1L1	CALR
CITED4	CANT1	CALU
CIZ1	CANX	CAMSAP1L1
CLASRP	CAPN1	CANT1
CLOCK	CASC3	CANX
CNBP	CASK	CAPN1
CNOT2	CASP3	CARD9
CNOT3	CASP8	CASC3
CNOT4	CASP9	CASK
CNOT6	CAST	CASP3
CNOT6L	CAT	CASP8
CNOT7	CBFB	CASP9
CNOT8	CBR1	CAT
CNTRL	CBR3	CBFB
COBRA1	CBS	CBR1
COIL	CCDC85B	CBR3
COPS2	CCDC86	CBS
COPS5	CCDC90A	CCDC85B
CRABP2	CCDC92	CCDC86
CRAMP1L	CCNA2	CCDC90A
CREB1	CCNB2	CCDC92
CREB3	CCND1	CCNA2
CREB3L1	CCND2	CCNB2
CREB3L2	CCNE1	CCND1
CREB3L3	CCNF	CCND2
CREB3L4	CCP110	CCND3
CREB5	CCT7	CCNE1
CREBBP	CCT8	CCP110
CREBL2	CD14	CCT7
CREBZF	CD19	CCT8
CREG1	CD24	CD14
CREM	CD320	CD19
CRTC1	CD44	CD24
CRTC2	CD58	CD320
CRX	CD83	CD44
CRY1	CD97	CD58
CSDA	CD99	CD83
CSDC2	CDA	CD99
CSDE1	CDC25A	CDA
CSRNP2	CDC25B	CDC25A
CSRNP3	CDC45	CDC25B
CSRP2	CDC7	CDC45
CSRP3	CDCA4	CDC7
CTBP1	CDCA8	CDCA4
CTBP2	CDH3	CDCA8
CTCF	CDK1	CDH1
CTCFL	CDK19	CDK1
CTDP1	CDK2	CDK2
CTDSPL	CDK4	CDK4
CTNNB1	CDK5	CDK5
CTNNBIP1	CDK6	CDK6
CTNNBL1	CDK7	CDK7
CTR9	CDK8	CDK8
CUX1	CDKAL1	CDKAL1
CUX2	CDKN1A	CDKN1A
CXXC1	CDKN1B	CDKN1B
DAB2	CDKN2A	CDKN2A
DACH1	CDKN2C	CDKN2C
DACH2	CDT1	CDT1
DAXX	CDX2	CDX2
DAZAP2	CEACAM6	CEACAM6
DBP	CEBPA	CEBPA
DBX1	CEBPB	CEBPB
DBX2	CEBPD	CEBPD
DCP1A	CEBPG	CEBPG
DDB1	CEBPZ	CENPE
DDB2	CENPE	CEP57
DDIT3	CEP55	CEP72
DDX20	CEP57	CERK
DDX5	CERK	CES2
DDX54	CES2	CETN3
DEAF1	CETN3	CFLAR
DEDD	CFLAR	CGRRF1
DEDD2	CGRRF1	CHAC1
DEK	CHAC1	CHCHD7
DENND4A	CHCHD7	CHD8
DHX38	CHD8	CHEK1
DIDO1	CHEK1	CHEK2
DIP2C	CHEK2	CHERP
DLX1	CHERP	CHIC2
DLX2	CHIC2	CHMP4A
DLX3	CHMP4A	CHMP6
DLX4	CHMP6	CHN1
DLX5	CHN1	CHRM3
DLX6	CHRM3	CHUK
DMAP1	CHUK	CIAPIN1
DMBX1	CIAPIN1	CIRBP
DMRT1	CIRBP	CISD1
DMRT2	CISD1	CISH
DMRT3	CISH	CLASRP
DMRTA1	CLASRP	CLCN3
DMRTA2	CLCN3	CLEC16A
DMRTB1	CLEC16A	CLIC4
DMRTC2	CLIC4	CLK2
DMTF1	CLK2	CLK3
DNAJC2	CLK3	CLK4
DNLZ	CLK4	CLPX
DNMT1	CLPX	CLSTN1
DNMT3A	CLSTN1	CLTB
DNMT3B	CLTB	CMPK1
DNMT3L	CMPK1	CNDP2
DOT1L	CNDP2	CNOT4
DPF1	CNOT4	CNPY3
DPF2	CNPY3	COASY
DPF3	COASY	COBL
DPRX	COG2	COG4
DR1	COG4	COG7
DRAP1	COG7	COL4A5
DRGX	COL4A5	COMT
DTX1	COMT	COPB2
DUX4	COPB2	COPS7A
DUXA	COPS5	COPZ1
DZIP3	COPS7A	COQ3
E2F1	COPZ1	COX4I1
E2F2	COQ3	COX5A
E2F3	CORO1A	COX5B
E2F4	COX4I1	COX7B
E2F5	COX5A	CPE
E2F6	COX5B	CPNE3
E2F7	COX7B	CPSF4
E2F8	CPE	CRADD
E4F1	CPNE3	CREB1
EAF1	CPSF4	CREB3L2
EBF1	CRADD	CREBBP
EBF2	CREB1	CREBL2
EBF3	CREB3L2	CREG1
EBF4	CREBBP	CRELD2
ECD	CREBL2	CREM
ECSIT	CREG1	CRK
EDF1	CRELD2	CRKL
EED	CREM	CROT
EEF1A1	CRK	CRTAP
EGR1	CRKL	CRYZ
EGR2	CROT	CS
EGR3	CRTAP	CSDA
EGR4	CRYZ	CSK
EHF	CS	CSNK1A1
EHMT1	CSDA	CSNK1D
EHMT2	CSK	CSNK1E
EIF2AK2	CSNK1A1	CSNK2A1
EIF5B	CSNK1D	CSNK2A2
ELAVL2	CSNK1E	CSRP1
ELF1	CSNK2A1	CTBP1
ELF2	CSNK2A2	CTCF
ELF3	CSRP1	CTLA4
ELF4	CTBP1	CTNNAL1
ELF5	CTCF	CTNNB1
ELK1	CTLA4	CTNND1
ELK3	CTNNAL1	CTNS
ELK4	CTNNB1	CTRB1
ELL	CTNND1	CTRB2
ELL2	CTNS	CTSB
ELL3	CTRB2	CTSD
EMX1	CTSB	CTSL1
EMX2	CTSD	CTSL2
EN1	CTSL1	CTTN
EN2	CTSL2	CXCL2
ENO1	CTTN	CXCR4
EOMES	CXCL2	CYB5A
EP300	CXCR4	CYB5R3
EP400	CYB561	CYCS
EPAS1	CYB5A	CYP1B1
EPC1	CYB5R3	CYP20A1
ERCC2	CYCS	CYP51A1
ERCC3	CYP1B1	CYTH1
ERCC6	CYP20A1	DAP
ERCC8	CYP51A1	DAXX
ERF	CYTH1	DCK
ERG	DAXX	DCPS
ESPL1	DCK	DCTD
ESR1	DCPS	DCTN6
ESR2	DCTD	DCUN1D4
ESRRA	DCTN6	DCXR
ESRRB	DCUN1D4	DDB2
ESRRG	DCXR	DDIT3
ESX1	DDB2	DDIT4
ETS1	DDIT3	DDOST
ETS2	DDIT4	DDR1
ETV1	DDOST	DDX10
ETV2	DDR1	DDX42
ETV3	DDX10	DDX49
ETV3L	DDX42	DDX5
ETV4	DDX49	DECR1
ETV5	DDX5	DEK
ETV6	DECR1	DENND1B
ETV7	DEK	DENND2D
EVX1	DENND1B	DERA
EVX2	DENND2D	DHCR24
EWSR1	DERA	DHCR7
EYA2	DFNB31	DHFR
EYA3	DHCR24	DHPS
EYA4	DHCR7	DHRS2
EZH1	DHDDS	DHRS7
EZH2	DHFR	DHX16
FAIM3	DHPS	DHX29
FAM170A	DHRS2	DHX8
FANK1	DHRS7	DICER1
FBXL19	DHX16	DLC1
FBXO7	DHX29	DLD
FERD3L	DHX8	DLGAP5
FEV	DICER1	DMTF1
FEZF1	DLD	DNAJA3
FEZF2	DLGAP5	DNAJB1
FHL2	DMTF1	DNAJB2
FHL5	DNAJA3	DNAJB6
FIGLA	DNAJB1	DNAJC1
FIZ1	DNAJB12	DNAJC12
FLI1	DNAJB2	DNAJC15
FLYWCH1	DNAJB6	DNM1
FMR1	DNAJC1	DNMT1
FOS	DNAJC12	DNTTIP2
FOSB	DNAJC15	DOK4
FOSL1	DNM1	DPH2
FOSL2	DNM1L	DPYD
FOXA1	DNMT1	DR1
FOXA2	DNTTIP2	DRAP1
FOXA3	DOK4	DSE
FOXB1	DPF1	DTNA
FOXB2	DPH2	DUSP11
FOXC1	DPYD	DUSP14
FOXC2	DR1	DUSP22
FOXD1	DRAP1	DUT
FOXD2	DSE	DVL1
FOXD3	DSG2	DYNLT3
FOXD4	DTNA	DYRK1A
FOXD4L1	DUSP11	DYRK3
FOXD4L2	DUSP14	E2F1
FOXD4L3	DUSP22	E2F3
FOXD4L5	DUT	E2F4
FOXD4L6	DVL1	E2F5
FOXE1	DYNLT3	E2F6
FOXE3	DYRK1A	EAPP
FOXF1	DYRK3	EBNA1BP2
FOXF2	E2F1	EBP
FOXG1	E2F3	ECD
FOXH1	E2F4	ECH1
FOXI1	E2F5	EDEM1
FOXI2	E2F6	EED
FOXI3	EAPP	EEF1D
FOXJ1	EBNA1BP2	EFCAB2
FOXJ2	EBP	EFNB3
FOXJ3	ECD	EGF
FOXK1	ECH1	EGFR
FOXK2	EDEM1	EHMT2
FOXL1	EED	EIF1B
FOXL2	EEF1D	EIF2AK1
FOXM1	EFCAB2	EIF2AK2
FOXN1	EFNB3	EIF2AK3
FOXN2	EGF	EIF2B2
FOXN3	EGFR	EIF2B3
FOXN4	EHMT2	EIF2B5
FOXO1	EIF1B	EIF2S2
FOXO3	EIF2AK1	EIF4A2
FOXO3B	EIF2AK2	EIF4B
FOXO4	EIF2AK3	EIF4E
FOXP1	EIF2B2	EIF4EBP1
FOXP2	EIF2B3	EIF4G1
FOXP3	EIF2B5	EIF5
FOXP4	EIF2S2	ELAC2
FOXQ1	EIF4A2	ELAVL1
FOXR1	EIF4B	ELF4
FOXR2	EIF4E	ELK1
FOXS1	EIF4EBP1	ELOVL6
FUBP1	EIF4G1	EML3
FUBP3	EIF5	ENOPH1
FUS	ELAC2	ENOSF1
FXR1	ELAVL1	ENTPD6
FXR2	ELF4	EP300
GABPA	ELK1	EPAS1
GABPB1	ELOVL6	EPB41L2
GABPB2	EML3	EPHA2
GAS7	ENOPH1	EPHB4
GATA1	ENOSF1	EPHX1
GATA2	ENTPD6	EPN2
GATA3	EP300	EPRS
GATA4	EPAS1	EPS8
GATA5	EPB41L2	ERAP1
GATA6	EPB41L4B	ERAP2
GATAD1	EPHA2	ERBB2
GATAD2A	EPHB4	ERBB3
GATAD2B	EPHX1	ERBB4
GBX1	EPN2	ERCC1
GBX2	EPRS	ERCC3
GCFC1	EPS8	ERCC5
GCM1	ERAP2	ERCC6L
GCM2	ERBB2	ERG
GFI1	ERBB3	ERLIN1
GFI1B	ERBB4	ESR1
GLI1	ERCC1	ESR2
GLI2	ERCC3	ESRRA
GLI3	ERCC5	ETFA
GLI4	ERCC6L	ETFB
GLIS1	ERLIN1	ETS1
GLIS2	ESR1	ETS2
GLIS3	ESRRA	ETV1
GMEB1	ETFA	EWSR1
GMEB2	ETFB	EXT1
GON4L	ETS2	EZH2
GPBP1	ETV1	F12
GPBP1L1	EVL	F3
GRHL1	EWSR1	FABP4
GRHL2	EXOSC4	FADD
GRHL3	EXT1	FAF1
GSC	EZH2	FAH
GSC2	F12	FAIM
GSX1	FABP4	FAM114A2
GSX2	FADD	FAM20B
GTF2A1	FAF1	FAM3C
GTF2A1L	FAH	FAM57A
GTF2A2	FAIM	FAM63A
GTF2B	FAM114A2	FAM69A
GTF2E1	FAM20B	FANCA
GTF2E2	FAM3C	FANCF
GTF2F1	FAM57A	FANCG
GTF2F2	FAM63A	FAS
GTF2H1	FAM69A	FASN
GTF2H2	FANCA	FASTKD5
GTF2H3	FANCG	FAT1
GTF2H4	FANCL	FBP1
GTF2I	FAS	FBRS
GTF2IRD1	FASN	FBXL12
GTF2IRD2	FASTKD5	FBXL20
GTF2IRD2B	FAT1	FBXO11
GTF3A	FBP1	FBXO21
GTF3C1	FBRS	FBXO5
GTF3C2	FBXL12	FBXO7
GTF3C3	FBXO11	FCHO1
GTF3C4	FBXO21	FDFT1
GTF3C5	FBXO5	FDPS
GZF1	FBXO7	FDX1
H1F0	FCHO1	FEZ1
H1FX	FDFT1	FEZ2
HABP4	FDPS	FGF2
HAND1	FDX1	FGFR1
HAND2	FEZ1	FGFR1OP
HAX1	FEZ2	FGFR2
HBP1	FGFR2	FGFR3
HCFC1	FGFR3	FGFR4
HCLS1	FGFR4	FHL2
HDAC1	FHL2	FIBP
HDAC10	FIBP	FIS1
HDAC11	FIS1	FKBP14
HDAC2	FKBP14	FKBP1A
HDAC3	FKBP1A	FKBP4
HDAC4	FKBP4	FLI1
HDAC5	FLT1	FLT1
HDAC7	FLT3	FLT3
HDAC8	FOS	FOS
HDAC9	FOSL1	FOSL1
HDGF	FOSL2	FOSL2
HDX	FOXJ3	FOXJ3
HELT	FOXO1	FOXO1
HELZ	FOXO3	FOXO3
HES1	FOXO4	FOXO4
HES2	FOXP3	FOXP3
HES3	FPGS	FPGS
HES4	FSD1	FSD1
HES5	FTSJ1	FTSJ1
HES6	FURIN	FURIN
HES7	FUT1	FUT1
HESX1	FUT2	FUT2
HEXIM1	FYN	FYN
HEY1	FZD5	FZD5
HEY2	G3BP1	G3BP1
HEYL	G6PD	G6PD
HHEX	GAA	GAA
HIC1	GABPB1	GABPB1
HIC2	GADD45A	GADD45A
HIF1A	GADD45B	GADD45B
HIF1AN	GALE	GAK
HIF3A	GAPDH	GALE
HINFP	GARS	GAPDH
HIPK2	GATA2	GARS
HIRA	GATA3	GATA1
HIST1H1B	GCH1	GATA2
HIST1H1C	GCLC	GATA3
HIST1H1D	GDPD5	GCH1
HIST1H1E	GFOD1	GCLC
HIST1H1T	GFOD2	GFOD1
HIST1H2BB	GFPT1	GFOD2
HIST1H2BC	GGA2	GFPT1
HIST1H2BD	GGCX	GGA2
HIST1H2BE	GGPS1	GGCX
HIST1H2BG	GHR	GGPS1
HIST1H2BH	GIPC1	GHR
HIST1H2BJ	GLI3	GIPC1
HIST1H2BN	GLIS3	GLI3
HIST2H2BE	GLOD4	GLIS3
HIVEP1	GLRX	GLOD4
HIVEP2	GLS	GLRX
HIVEP3	GLTSCR1	GLS
HKR1	GLUD1	GLTSCR1
HLF	GM2A	GLUD1
HLTF	GMDS	GM2A
HLX	GMEB1	GMDS
HMBOX1	GMEB2	GMEB1
HMG20A	GMNN	GMEB2
HMG20B	GNA11	GMNN
HMGA1	GNA12	GNA11
HMGA2	GNAI2	GNA12
HMGB1	GNAS	GNAI2
HMGB2	GNB5	GNAS
HMGB3	GNPDA1	GNB5
HMGB3P1	GOLIM4	GNPDA1
HMGB4	GOLT1B	GOLIM4
HMGN1	GOT1	GOLT1B
HMGN2	GPATCH8	GOT1
HMGN3	GPC1	GPATCH8
HMGN4	GPER	GPC1
HMGN5	GPR125	GPR125
HMGXB3	GPR137	GPR137
HMGXB4	GPR31	GPR31
HMX1	GPR56	GPR35
HMX2	GPRC5A	GPR56
HMX3	GPRC5C	GPR65
HNF1A	GRB10	GPRC5A
HNF1B	GRB2	GPRC5C
HNF4A	GRHPR	GRB2
HNF4G	GRN	GRHPR
HNRNPAB	GRWD1	GRN
HNRNPD	GSK3A	GRWD1
HNRNPK	GSK3B	GSDMB
HNRNPR	GSR	GSK3A
HNRNPUL1	GSS	GSK3B
HOMEZ	GSTM1	GSR
HOPX	GSTM2	GSS
HOXA1	GSTP1	GSTM1
HOXA10	GSTT1	GSTM2
HOXA11	GSTZ1	GSTP1
HOXA13	GTDC1	GSTT1
HOXA2	GTF2A2	GSTZ1
HOXA3	GTF2B	GTDC1
HOXA4	GTF2E2	GTF2A2
HOXA5	GTF2I	GTF2B
HOXA6	GTPBP8	GTF2E2
HOXA7	GYS1	GTF2I
HOXA9	H2AFV	GTPBP8
HOXB1	HADH	GYS1
HOXB13	HADHB	H2AFV
HOXB2	HAT1	HADH
HOXB3	HAX1	HADHB
HOXB4	HBE1	HAT1
HOXB5	HDAC1	HAX1
HOXB6	HDAC2	HBE1
HOXB7	HDAC3	HDAC1
HOXB8	HDAC4	HDAC2
HOXB9	HDAC6	HDAC3
HOXC10	HDGFRP3	HDAC4
HOXC11	HEATR1	HDAC5
HOXC12	HEBP1	HDAC6
HOXC13	HERC6	HDAC8
HOXC4	HERPUD1	HDGFRP3
HOXC5	HES1	HEATR1
HOXC6	HEY1	HERC6
HOXC8	HFE	HERPUD1
HOXC9	HGS	HES1
HOXD1	HIF1A	HEY1
HOXD10	HIGD2A	HFE
HOXD11	HINT1	HGS
HOXD12	HIST1H2BD	HIF1A
HOXD13	HIST1H2BK	HIGD2A
HOXD3	HIST2H2BE	HINT1
HOXD4	HK1	HIST1H2BD
HOXD8	HLF	HIST1H2BK
HOXD9	HMG20B	HIST2H2BE
HR	HMGA1	HK1
HSBP1	HMGCL	HLF
HSF1	HMGCR	HMGA1
HSF2	HMGCS1	HMGCL
HSF2BP	HMOX1	HMGCR
HSF4	HN1L	HMGCS1
HSF5	HOMER2	HMOX1
HSFX1	HOOK2	HN1L
HSFX2	HOXA10	HNF4A
HSFY2	HOXA5	HOMER2
HTATIP2	HOXA9	HOOK2
HTATSF1	HOXC9	HORMAD2
HTT	HPRT1	HOXA10
ID1	HRAS	HOXA5
ID2	HRSP12	HOXA9
ID3	HS2ST1	HOXC9
ID4	HS3ST3A1	HPRT1
IFI16	HSD17B10	HRAS
IFT57	HSD17B11	HRSP12
IGHMBP2	HSD17B7	HS2ST1
IKBKB	HSP90AA1	HS3ST3A1
IKBKG	HSP90B1	HSD17B10
IKZF1	HSPA14	HSD17B11
IKZF2	HSPA4	HSD17B7
IKZF3	HSPA5	HSP90AA1
IKZF4	HSPA8	HSP90AB1
IKZF5	HSPA9	HSP90B1
ILF2	HSPB1	HSPA14
ILF3	HSPB8	HSPA4
ING1	HSPD1	HSPA5
ING2	HTATSF1	HSPA8
ING3	HTRA1	HSPA9
ING4	HUS1	HSPB1
ING5	HYOU1	HSPB8
INSM1	IARS2	HSPD1
INSM2	ICAM3	HTATSF1
INTS12	ICMT	HTRA1
IRF1	ID1	HUS1
IRF2	ID2	IARS2
IRF2BP1	ID4	ICAM3
IRF3	IDE	ICMT
IRF4	IDH1	ID1
IRF5	IDH2	ID2
IRF6	IER3	ID4
IRF7	IFIT5	IDE
IRF8	IFNAR2	IDH1
IRF9	IFNGR1	IDH2
IRX1	IFRD2	IER3
IRX2	IGF1R	IFIH1
IRX3	IGF2R	IFIT5
IRX4	IGFBP2	IFNAR2
IRX5	IGFBP4	IFNGR1
IRX6	IGHMBP2	IFRD2
ISL1	IKBKAP	IGF1
ISL2	IKBKB	IGF1R
ISX	IKBKE	IGF2R
IVNS1ABP	IKBKG	IGFBP2
JARID2	IL10RB	IGFBP4
JAZF1	IL13RA1	IGHMBP2
JDP2	IL1RAP	IKBKAP
JMJD1C	IL2	IKBKB
JMY	IL4	IKBKE
JRK	IL4R	IKBKG
JUN	IL6	IKZF1
JUNB	IL8	IL10RB
JUND	ILF3	IL13RA1
KANK2	ILK	IL18RAP
KAT2B	IMPA1	IL1RAP
KAT5	IMPA2	IL2
KCMF1	IMPDH1	IL23R
KCNH8	IMPDH2	IL27
KCNIP3	INPP1	IL4
KDM1A	INPP4B	IL4R
KDM2A	INPPL1	IL6
KDM2B	INSIG1	IL6ST
KDM4A	INSR	IL8
KDM4B	INTS3	ILF3
KDM4C	IPO13	ILK
KDM5A	IQGAP1	IMPA1
KDM5B	IRAK1	IMPA2
KDM5C	IRF3	IMPDH1
KDM5D	IRF9	IMPDH2
KHDRBS1	IRS1	INPP1
KHDRBS2	IRS2	INPP4B
KHSRP	ISOC1	INPPL1
KLF1	ITFG1	INS
KLF10	ITGAE	INSIG1
KLF11	ITGB1	INSR
KLF12	ITGB1BP1	IPO13
KLF13	ITGB4	IQGAP1
KLF14	ITGB5	IRAK1
KLF15	ITSN1	IRF3
KLF16	JAK1	IRF9
KLF17	JAK2	IRGM
KLF2	JAK3	IRS1
KLF3	JMJD6	IRS2
KLF4	JOSD1	ISOC1
KLF5	JUN	ITFG1
KLF6	KAZALD1	ITGAE
KLF7	KBTBD2	ITGB1
KLF8	KCNG1	ITGB1BP1
KLF9	KCNK1	ITGB4
KNTC1	KCNMA1	ITGB5
KRBA1	KCTD2	ITSN1
L3MBTL1	KCTD5	JAK1
L3MBTL2	KDELR2	JAK2
L3MBTL3	KDELR3	JAK3
L3MBTL4	KDM3A	JMJD6
LBX1	KDM5A	JUN
LBX2	KDM5B	KAZALD1
LCOR	KDR	KBTBD2
LCORL	KEAP1	KCNG1
LDB1	KHDRBS1	KCNK1
LDB2	KIAA0100	KCNMA1
LEF1	KIAA0196	KCTD2
LEUTX	KIAA0317	KDELR2
LHX1	KIAA0355	KDM5A
LHX2	KIAA0494	KDM5B
LHX3	KIAA0528	KDR
LHX4	KIAA0753	KEAP1
LHX5	KIAA0907	KHDRBS1
LHX6	KIAA0922	KIAA0100
LHX8	KIAA1009	KIAA0196
LHX9	KIAA1033	KIAA0317
LIMD1	KIAA1279	KIAA0355
LIN28A	KIF14	KIAA0494
LITAF	KIF20A	KIAA0528
LMO1	KIF2C	KIAA0753
LMO2	KIF5C	KIAA0907
LMO3	KIT	KIAA0922
LMO4	KLF5	KIAA1009
LMX1A	KLHDC2	KIAA1033
LMX1B	KLHL21	KIAA1279
LRRFIP1	KLHL9	KIF14
LYL1	KRAS	KIF21B
LZTFL1	KTN1	KIF2C
LZTR1	LAGE3	KIF5C
LZTS1	LAMA3	KIT
MAEL	LAMB1	KLF5
MAF	LAMTOR3	KLHDC2
MAF1	LAP3	KLHL21
MAFA	LASP1	KRAS
MAFB	LBR	KTN1
MAFF	LCK	LAGE3
MAFG	LCN2	LAMA3
MAFK	LDHA	LAMB1
MAML1	LDHB	LAMTOR3
MAML3	LGALS8	LAP3
MAPK8IP1	LGMN	LASP1
MATR3	LHPP	LBR
MAX	LHX3	LCK
MAZ	LIF	LCN2
MBD1	LIG1	LDHA
MBD2	LIMK2	LDHB
MBD3	LIPA	LGALS8
MBD3L1	LOXL1	LGMN
MCM2	LPAR2	LHPP
MCM3	LPGAT1	LHX3
MCM4	LRP10	LIF
MCM5	LRP4	LIG1
MCM6	LRPAP1	LIMK2
MCM7	LRRC16A	LIPA
MCM8	LRRC18	LOXL1
MCM9	LRRC32	LPAR2
MDM4	LRRC40	LPGAT1
MECOM	LRRC41	LRP10
MECP2	LRRK2	LRP4
MED1	LSM5	LRPAP1
MED12	LSM6	LRRC16A
MED13	LSR	LRRC18
MED14	LSS	LRRC32
MED15	LYN	LRRC40
MED16	LYPD3	LRRC41
MED17	LYPLA1	LRRK2
MED20	LYRM1	LSM5
MED21	LZIC	LSM6
MED23	MACF1	LSP1
MED26	MAD2L1BP	LSR
MED27	MALT1	LSS
MED30	MAMLD1	LYN
MED31	MAN2A2	LYPD3
MED4	MAN2B1	LYPLA1
MED6	MAP2K1	LYRM1
MED7	MAP2K2	LZIC
MED8	MAP2K4	MACF1
MEF2A	MAP2K5	MAD2L1BP
MEF2B	MAP3K14	MALT1
MEF2C	MAP3K4	MAMLD1
MEF2D	MAP3K7	MAN2A2
MEIS1	MAP4K3	MAN2B1
MEIS2	MAP4K4	MAP2K1
MEIS3	MAP7	MAP2K2
MEIS3P1	MAPK1	MAP2K4
MEN1	MAPK13	MAP2K5
MEOX1	MAPK14	MAP3K14
MEOX2	MAPK1IP1L	MAP3K4
MESP1	MAPK3	MAP3K7
MESP2	MAPK9	MAP4K3
MGA	MAPKAPK2	MAP4K4
MIER1	MAPKAPK3	MAP7
MIER2	MAPKAPK5	MAPK1
MIER3	MARK4	MAPK13
MIS18BP1	MAST2	MAPK14
MITF	MAX	MAPK1IP1L
MIXL1	MB	MAPK3
MKI67IP	MBNL1	MAPK8
MKL1	MBNL2	MAPK9
MKL2	MBOAT7	MAPKAPK2
MKX	MBTPS1	MAPKAPK3
MLL	MCM3	MAPKAPK5
MLL2	MCOLN1	MARK4
MLL3	MCTS1	MAST2
MLL5	MDM2	MAX
MLLT1	ME2	MB
MLLT10	MECP2	MBNL1
MLLT3	MED1	MBNL2
MLLT6	MED28	MBOAT7
MLX	MED7	MBTPS1
MLXIP	MEF2A	MCM3
MLXIPL	MEF2C	MCOLN1
MMS19	MEGF9	MCTS1
MNDA	MELK	MDM2
MNT	MEST	ME2
MNX1	MET	MECP2
MORC1	METAP2	MED1
MORC2	METRN	MED28
MORC3	METTL1	MED7
MORC4	MFSD10	MEF2A
MORF4	MGAT4A	MEF2C
MPHOSPH8	MGLL	MEGF9
MRPL28	MGST2	MELK
MSC	MICALL1	MEN1
MSGN1	MLEC	MEST
MSL3	MLH1	MET
MSRB2	MLL	METAP2
MSX1	MLLT11	METRN
MSX2	MLST8	METTL1
MTA1	MPDZ	MFHAS1
MTA2	MPL	MFSD10
MTA3	MPZL1	MGAT4A
MTF1	MRPL12	MGLL
MTF2	MRPL18	MGST2
MXD1	MRPL19	MICALL1
MXD3	MRPS16	MLEC
MXD4	MRPS2	MLH1
MXI1	MSH6	MLL
MYB	MSRA	MLST8
MYBBP1A	MSRB2	MPDZ
MYBL1	MST1	MPL
MYBL2	MSX1	MPZL1
MYC	MTA1	MRPL12
MYCBP	MTERFD1	MRPL18
MYCL1	MTF2	MRPL19
MYCN	MTFR1	MRPS16
MYEF2	MTHFD1	MRPS2
MYF5	MTHFD2	MSH2
MYF6	MTOR	MSH6
MYNN	MTX2	MSRB2
MYOCD	MVP	MST1
MYOD1	MXI1	MSX1
MYOG	MYB	MTA1
MYPOP	MYBL2	MTERFD1
MYT1	MYC	MTFR1
MYT1L	MYCBP	MTHFD1
MZF1	MYCBP2	MTHFD2
NAA15	MYD88	MTOR
NAB1	MYO10	MVP
NAB2	MYST3	MXI1
NANOG	MYST4	MYB
NAP1L2	NAA50	MYBL2
NAP1L3	NAE1	MYC
NAP1L4	NAMPT	MYCBP
NAT14	NARFL	MYCBP2
NCOA1	NAT1	MYCL1
NCOA2	NBN	MYCN
NCOA3	NBR1	MYD88
NCOA4	NCAPD2	MYO10
NCOA5	NCF2	MYST3
NCOA6	NCOA3	MYST4
NCOR1	NCOA4	NAA25
NCOR2	NCOR2	NAA50
NDN	NDFIP1	NAE1
NDNL2	NDRG1	NAMPT
NEIL2	NDUFA2	NARFL
NEUROD1	NDUFA3	NAT1
NEUROD2	NDUFA5	NBN
NEUROD4	NDUFB6	NBR1
NEUROD6	NEK2	NCAPD2
NEUROG1	NEK4	NCF2
NEUROG2	NEK7	NCOA3
NEUROG3	NENF	NCOA4
NFAT5	NET1	NCOR2
NFATC1	NF1	NDFIP1
NFATC2	NF2	NDRG1
NFATC3	NFE2L2	NDUFA2
NFATC4	NFIL3	NDUFA3
NFE2	NFKB1	NDUFA5
NFE2L1	NFKBIA	NDUFB6
NFE2L2	NFYB	NEK2
NFE2L3	NGRN	NEK4
NFIA	NIPBL	NEK7
NFIB	NIPSNAP1	NENF
NFIC	NISCH	NET1
NFIL3	NIT1	NF1
NFIX	NLK	NF2
NFKB1	NMT1	NFE2L2
NFKB2	NNT	NFIL3
NFKBIA	NOD1	NFKB1
NFKBIB	NOD2	NFKBIA
NFKBIL1	NOL3	NFYB
NFKBIZ	NOLC1	NGFR
NFRKB	NONO	NGRN
NFX1	NOSIP	NIPBL
NFXL1	NOTCH1	NIPSNAP1
NFYA	NOTCH2	NISCH
NFYB	NPC1	NIT1
NFYC	NPDC1	NLK
NHLH1	NPEPL1	NMT1
NHLH2	NPM1	NNT
NKD2	NPRL2	NOD1
NKRF	NQO1	NOD2
NKX1-2	NQO2	NOL3
NKX2-1	NR1D2	NOLC1
NKX2-2	NR1H2	NONO
NKX2-3	NR2C1	NOSIP
NKX2-4	NR2C2	NOTCH1
NKX2-5	NR2F1	NOTCH2
NKX2-6	NR2F2	NPC1
NKX2-8	NR2F6	NPDC1
NKX3-1	NR3C1	NPEPL1
NKX3-2	NRAS	NPM1
NKX6-1	NRBP1	NQO1
NKX6-2	NRIP1	NQO2
NKX6-3	NSA2	NR1D2
NME1-NME2	NSD1	NR1H2
NME2	NSDHL	NR2C1
NMI	NSFL1C	NR2C2
NOBOX	NT5DC2	NR2F1
NONO	NTAN1	NR2F2
NOTCH1	NTRK1	NR2F6
NOTCH2	NTRK3	NR3C1
NOTCH2NL	NUAK1	NRAS
NOTCH3	NUCB2	NRBP1
NOTCH4	NUDCD3	NRIP1
NOTO	NUDT6	NSA2
NPAS1	NUDT9	NSD1
NPAS2	NUP133	NSDHL
NPAS3	NUP62	NSFL1C
NPAS4	NUP85	NT5DC2
NPAT	NUP88	NTAN1
NPM1	NUP93	NTRK1
NPM2	NUSAP1	NTRK3
NR0B1	NVL	NUAK1
NR0B2	OAT	NUCB2
NR1D1	OGFOD1	NUDCD3
NR1D2	ORC1	NUDT6
NR1H2	ORMDL3	NUDT9
NR1H3	OXA1L	NUMA1
NR1H4	OXCT1	NUP133
NR1I2	OXSR1	NUP62
NR1I3	OXTR	NUP85
NR2C1	P2RY2	NUP88
NR2C2	P4HA2	NUP93
NR2E1	P4HTM	NUSAP1
NR2E3	PACSIN3	NVL
NR2F1	PAF1	OAT
NR2F2	PAFAH1B1	ORC1
NR2F6	PAFAH1B2	ORMDL3
NR3C1	PAFAH1B3	OTUD3
NR3C2	PAICS	OXA1L
NR4A1	PAK4	OXCT1
NR4A2	PAN2	OXSR1
NR4A3	PANK2	OXTR
NR5A1	PANK4	P2RY2
NR5A2	PAPD7	P4HA2
NR6A1	PARL	P4HTM
NRBF2	PARN	PACSIN3
NRF1	PARP1	PAF1
NRIP1	PARP2	PAFAH1B1
NRK	PARP4	PAFAH1B2
NRL	PAX6	PAFAH1B3
NSD1	PAX8	PAICS
NUPR1	PBK	PAK4
OLIG1	PBX1	PAN2
OLIG2	PCBD1	PANK2
OLIG3	PCCB	PANK4
ONECUT1	PCK2	PAPD7
ONECUT2	PCM1	PARL
ONECUT3	PCMT1	PARP1
ORC2	PCNA	PARP2
OSR1	PCSK7	PARP4
OSR2	PDGFRA	PAX6
OTP	PDGFRB	PAX8
OTX1	PDHX	PBK
OTX2	PDIA5	PBX1
OVOL1	PDLIM1	PCBD1
OVOL2	PDPK1	PCCB
PA2G4	PDS5A	PCK2
PAPOLA	PDS5B	PCM1
PAPOLB	PDXK	PCMT1
PAPOLG	PECR	PCNA
PARN	PEPD	PCSK7
PARP1	PER2	PDGFRA
PATZ1	PET112	PDGFRB
PAWR	PEX11A	PDHX
PAX1	PEX12	PDIA5
PAX2	PEX19	PDLIM1
PAX3	PGM1	PDPK1
PAX4	PGRMC1	PDS5A
PAX5	PHB2	PDS5B
PAX6	PHF15	PDXK
PAX7	PHF2	PECR
PAX8	PHGDH	PEPD
PAX9	PHKA1	PER2
PBRM1	PHKB	PET112
PBX1	PHKG2	PEX11A
PBX2	PIGB	PEX19
PBX3	PIGK	PGM1
PBX4	PIH1D1	PGRMC1
PBXIP1	PIK3C2B	PHB2
PCBD1	PIK3CA	PHF2
PCBD2	PIK3CB	PHGDH
PCGF2	PIK3R1	PHKA1
PCGF6	PIK3R4	PHKB
PDCD11	PIM1	PHKG2
PDLIM1	PIN1	PIAS2
PDLIM4	PIP4K2B	PIGB
PDX1	PJA1	PIGK
PEG3	PKD1	PIH1D1
PER1	PKIG	PIK3C2B
PER2	PKM2	PIK3CA
PER3	PKN2	PIK3CB
PFDN1	PLA2G15	PIK3R1
PGBD1	PLAT	PIK3R4
PGR	PLAU	PIM1
PHB2	PLAUR	PIN1
PHF1	PLCG1	PIP4K2B
PHF10	PLEKHJ1	PJA1
PHF12	PLEKHM1	PKD1
PHF13	PLK2	PKIG
PHF14	PLOD3	PKM2
PHF15	PLP2	PKN2
PHF16	PLS1	PLA2G15
PHF17	PLSCR1	PLAT
PHF19	PLSCR3	PLAU
PHF2	PLXNA2	PLAUR
PHF20	PMAIP1	PLCG1
PHF21A	PMF1	PLEKHJ1
PHF21B	PML	PLEKHM1
PHF23	PMM2	PLK1
PHF3	PMPCB	PLK2
PHF5A	PMS1	PLOD3
PHF6	PMS2P3	PLP2
PHF7	PNKP	PLS1
PHF8	PNP	PLSCR1
PHOX2A	POLA1	PLSCR3
PHOX2B	POLA2	PLXNA2
PHTF1	POLB	PMAIP1
PHTF2	POLD4	PML
PIAS1	POLE2	PMM2
PIAS2	POLG2	PMS1
PIAS3	POLQ	PMS2P3
PIAS4	POLR1C	PNKP
PIR	POLR2A	PNP
PITX1	POLR2D	POLA1
PITX2	POLR2I	POLA2
PITX3	POLR2K	POLB
PKNOX1	POLR3B	POLD4
PKNOX2	POP4	POLE2
PLAG1	POR	POLG2
PLAGL1	POU2F1	POLQ
PLAGL2	PPAP2A	POLR1C
PLRG1	PPARD	POLR2A
PML	PPARG	POLR2D
PMS1	PPIA	POLR2I
PMS2P3	PPIC	POLR2K
PNN	PPIE	POLR3B
PNRC2	PPIF	POP4
POGK	PPOX	POR
POLR1A	PPP1CC	POU2F1
POLR1B	PPP1R14B	PPAP2A
POLR1C	PPP1R8	PPARD
POLR1D	PPP2CA	PPARG
POLR1E	PPP2R1A	PPIA
POLR2A	PPP2R3A	PPIC
POLR2B	PPP2R3C	PPIE
POLR2C	PPP2R5A	PPIF
POLR2D	PPP2R5B	PPM1D
POLR2E	PPP2R5E	PPOX
POLR2F	PPP3CA	PPP1CC
POLR2G	PPP4R1	PPP1R14B
POLR2H	PRAF2	PPP1R8
POLR2I	PRCP	PPP2CA
POLR2J	PRDM1	PPP2R1A
POLR2J2	PREB	PPP2R3A
POLR2K	PREP	PPP2R3C
POLR2L	PRKACA	PPP2R5A
POLR3A	PRKACB	PPP2R5E
POLR3B	PRKAR1A	PPP3CA
POLR3C	PRKAR2A	PPP4R1
POLR3D	PRKAR2B	PRAF2
POLR3E	PRKCA	PRCC
POLR3F	PRKCD	PRCP
POLR3H	PRKCE	PRDM1
POLR3K	PRKCH	PREB
POU1F1	PRKCI	PREP
POU2AF1	PRKCZ	PRKAB1
POU2F1	PRKDC	PRKACA
POU2F2	PRMT3	PRKACB
POU2F3	PRPF4	PRKAR1A
POU3F1	PRPF6	PRKAR2A
POU3F2	PRPSAP2	PRKAR2B
POU3F3	PRR15L	PRKCA
POU3F4	PRR7	PRKCD
POU4F1	PRSS23	PRKCE
POU4F2	PRUNE	PRKCH
POU4F3	PSIP1	PRKCI
POU5F1	PSMB1	PRKCZ
POU5F1B	PSMB2	PRKDC
POU5F2	PSMD1	PRMT3
POU6F1	PSMD10	PRPF4
POU6F2	PSMD4	PRPF4B
PPAN	PSMD5	PRPF6
PPARA	PSMG1	PRPSAP2
PPARD	PSRC1	PRR15L
PPARG	PTCH1	PRR7
PPARGC1A	PTEN	PRSS23
PPARGC1B	PTK2	PRUNE
PQBP1	PTPLA	PSIP1
PRDM1	PTPLAD1	PSMB1
PRDM10	PTPN1	PSMB2
PRDM12	PTPN11	PSMD1
PRDM13	PTPN12	PSMD10
PRDM14	PTPN2	PSMD4
PRDM15	PTPRF	PSMD5
PRDM16	PTPRK	PSMG1
PRDM2	PTTG1	PSRC1
PRDM4	PUF60	PTCH1
PRDM5	PUM2	PTEN
PRDM6	PURA	PTGER4
PRDM7	PUS10	PTK2
PRDM8	PUS7L	PTPLA
PRDM9	PWP1	PTPN1
PREB	PXMP2	PTPN11
PRICKLE3	PXN	PTPN12
PRKDC	PYCR1	PTPN2
PROP1	PYGL	PTPN22
PROX1	QRSL1	PTPRF
PROX2	RAB11FIP2	PTTG1
PRPF4B	RAB1B	PUF60
PRRX1	RAB21	PURA
PRRX2	RAB27A	PUS10
PSIP1	RAB31	PUS7L
PSMC3IP	RAB3GAP1	PWP1
PTF1A	RAB4A	PXMP2
PTMA	RABGGTA	PXN
PTRF	RAC1	PYCR1
PTTG1	RAD1	PYGL
PURA	RAD23B	QRSL1
PURB	RAD51C	RAB11FIP2
PWP1	RAD9A	RAB1B
PYGO1	RAE1	RAB21
PYGO2	RAF1	RAB27A
RAD51	RAGE	RAB31
RAD54B	RAI14	RAB3GAP1
RAI1	RALA	RAB4A
RAI14	RALB	RABGGTA
RARA	RALBP1	RAC1
RARB	RAP1A	RAD1
RARG	RAP1GAP	RAD23B
RAX	RAP1GDS1	RAD51
RAX2	RARA	RAD51C
RB1	RASA1	RAD54L
RBAK	RB1	RAD9A
RBBP4	RBBP6	RAE1
RBBP7	RBKS	RAF1
RBCK1	RBM15	RAGE
RBFOX2	RBM15B	RAI14
RBL1	RBM34	RALA
RBL2	RBM6	RALB
RBM14	REEP5	RALBP1
RBM15	REL	RAP1A
RBM15B	RELA	RAP1GAP
RBM39	RELB	RAP1GDS1
RBM7	RFC1	RARA
RBMX	RFC2	RASA1
RBMXL2	RFC5	RB1
RBPJ	RFNG	RBBP6
RBPJL	RFX5	RBKS
RC3H1	RGS2	RBM15
RC3H2	RHEB	RBM15B
RCAN1	RHOBTB1	RBM34
RCHY1	RIOK2	RBM6
RCOR1	RIPK2	RCHY1
RCOR2	RNASET2	RDBP
RCOR3	RNF145	REEP5
RDBP	RNF167	REL
REL	RNH1	RELA
RELA	RNLS	RET
RELB	RNMT	RFC1
RERE	RNPS1	RFC5
REST	ROCK1	RFNG
REXO4	ROCK2	RGS2
RFC1	RORC	RHEB
RFX1	RPA1	RHOA
RFX2	RPA2	RHOBTB1
RFX3	RPA3	RIOK2
RFX4	RPF1	RIPK2
RFX5	RPIA	RNASET2
RFX6	RPL22	RNF123
RFX7	RPL39L	RNF145
RFX8	RPL7	RNF167
RFXANK	RPN1	RNF186
RFXAP	RPN2	RNH1
RGS14	RPP38	RNLS
RHOXF1	RPS6	RNMT
RHOXF2B	RPS6KA1	ROCK1
RING1	RPS6KA3	ROCK2
RLF	RPS6KA4	RORC
RLIM	RPS6KB1	ROS1
RNF14	RPS6KL1	RPA1
RNF141	RPS7	RPA2
RNF19A	RPTOR	RPA3
RNF2	RRAGA	RPF1
RNF4	RRM2	RPIA
RNF6	RRP12	RPL22
RNPS1	RRP1B	RPL39L
RORA	RRP8	RPL7
RORB	RRS1	RPN1
RORC	RSU1	RPN2
RPL7	RTCD1	RPP38
RREB1	RTN2	RPS19
RRN3	RUVBL1	RPS6
RSF1	RXRA	RPS6KA1
RUNX1	RYBP	RPS6KA3
RUNX1T1	S100A13	RPS6KA4
RUNX2	S100A4	RPS6KB1
RUNX3	SACM1L	RPS6KL1
RUVBL1	SAP18	RPS7
RUVBL2	SC4MOL	RPTOR
RXRA	SC5DL	RRAGA
RXRB	SCAF8	RRM1
RXRG	SCAND1	RRM2
RYBP	SCAP	RRP12
SAFB	SCARB1	RRP1B
SAFB2	SCCPDH	RRP8
SALL1	SCNN1A	RRS1
SALL2	SCP2	RSU1
SALL3	SCRN1	RTCD1
SALL4	SCYL3	RTN2
SAP18	SDHB	RUNX1
SAP30	SDHC	RUVBL1
SAP30BP	SDHD	RXRA
SARNP	SEC14L1	RYBP
SATB1	SEC24B	RYK
SATB2	SEC24C	S100A13
SCAF1	SEC61A2	S100A4
SCAF8	SENP5	SACM1L
SCAND1	SENP6	SAP18
SCAND2	SERPINE1	SC4MOL
SCAND3	SERTAD3	SC5DL
SCMH1	SESN1	SCAF8
SCML1	SET	SCAND1
SCML2	SETD1B	SCAP
SCML4	SETDB1	SCARB1
SCRT1	SFMBT1	SCCPDH
SCRT2	SFN	SCNN1A
SCXB	SFPQ	SCP2
SCYL1	SGCB	SCRN1
SEBOX	SGK1	SCYL3
SEC14L2	SH2B3	SDHB
SERTAD1	SH3BP5	SDHC
SERTAD2	SH3GL1	SDHD
SERTAD3	SHB	SEC14L1
SETBP1	SHC1	SEC16A
SF1	SHH	SEC24B
SFMBT1	SHMT2	SEC24C
SFPQ	SIAH2	SEC61A2
SFSWAP	SIK1	SENP2
SHOX	SIRPG	SENP5
SHOX2	SIRT1	SENP6
SHPRH	SIRT2	SERPINE1
SIM1	SIRT5	SESN1
SIM2	SKIV2L	SET
SIN3A	SKP2	SETD1B
SIN3B	SLC11A2	SETDB1
SIRT1	SLC16A1	SFMBT1
SIRT2	SLC16A6	SFN
SIRT3	SLC1A4	SFPQ
SIRT4	SLC25A13	SGCB
SIRT5	SLC25A14	SGK1
SIRT7	SLC25A22	SH2B3
SIX1	SLC25A4	SH3BP5
SIX2	SLC25A46	SH3GL1
SIX3	SLC27A3	SHB
SIX4	SLC29A2	SHC1
SIX5	SLC2A1	SHH
SIX6	SLC2A6	SHMT2
SKI	SLC35A1	SIAH1
SKIL	SLC35A3	SIAH2
SKOR1	SLC35B1	SIK1
SLA2	SLC35F2	SIRPG
SLC26A3	SLC36A1	SIRT1
SLC2A4RG	SLC37A4	SIRT2
SLC30A9	SLC5A6	SIRT5
SMAD1	SLC7A5	SKIV2L
SMAD2	SLK	SKP2
SMAD3	SMAD1	SLC11A2
SMAD4	SMAD2	SLC16A1
SMAD5	SMAD3	SLC16A6
SMAD6	SMAD4	SLC1A4
SMAD7	SMAD6	SLC25A14
SMAD9	SMAD7	SLC25A28
SMARCA1	SMARCA4	SLC25A4
SMARCA2	SMARCB1	SLC25A46
SMARCA4	SMARCC1	SLC29A2
SMARCA5	SMARCD2	SLC2A1
SMARCAD1	SMARCE1	SLC2A6
SMARCB1	SMC1A	SLC35A1
SMARCC1	SMC3	SLC35A3
SMARCC2	SMC4	SLC35B1
SMARCD1	SMG7	SLC35F2
SMARCD2	SMNDC1	SLC36A1
SMARCD3	SMURF1	SLC37A4
SMARCE1	SMURF2	SLC39A8
SMURF2	SMYD3	SLC5A6
SMYD1	SNRPD1	SLC7A5
SNAI1	SNX11	SLK
SNAI2	SNX13	SMAD1
SNAI3	SNX17	SMAD2
SNAPC1	SNX2	SMAD3
SNAPC2	SNX6	SMAD4
SNAPC3	SNX7	SMAD6
SNAPC4	SOAT1	SMAD7
SNAPC5	SOCS2	SMARCA4
SND1	SOD1	SMARCB1
SNIP1	SORBS3	SMARCC1
SNRNP27	SOS1	SMARCD2
SNRPB	SOX4	SMARCE1
SNRPD1	SP110	SMC1A
SNW1	SP140	SMC3
SOHLH1	SP3	SMC4
SOHLH2	SPA17	SMG7
SOLH	SPAG4	SMNDC1
SOX1	SPAG7	SMURF1
SOX10	SPDEF	SMURF2
SOX11	SPECC1L	SMYD3
SOX12	SPEN	SNRPD1
SOX13	SPR	SNX11
SOX14	SPRED2	SNX13
SOX15	SPTLC2	SNX2
SOX17	SQLE	SNX6
SOX18	SQRDL	SNX7
SOX2	SQSTM1	SOAT1
SOX21	SRF	SOCS2
SOX3	SRP14	SOD1
SOX30	SRPRB	SORBS3
SOX4	SRRM1	SOS1
SOX5	SRSF3	SOX4
SOX6	SRSF4	SP110
SOX7	SRSF8	SP140
SOX8	SS18L1	SP3
SOX9	SSBP2	SPA17
SP1	ST3GAL5	SPAG4
SP100	ST6GALNAC2	SPAG7
SP110	ST7	SPDEF
SP140	STAM	SPECC1L
SP140L	STAM2	SPEN
SP2	STAMBP	SPR
SP3	STAP2	SPRED2
SP4	STAT1	SPTLC2
SP5	STAT3	SQLE
SP6	STAT5A	SQSTM1
SP7	STAT5B	SRC
SP8	STAT6	SRF
SP9	STK10	SRP14
SPDEF	STK17A	SRPRB
SPEN	STK25	SRRM1
SPI1	STK3	SRSF3
SPIB	STK33	SRSF4
SPIC	STK39	SRSF8
SPO11	STMN1	SS18L1
SPOCD1	STUB1	ST13
SPZ1	STX1A	ST3GAL5
SRCAP	STX4	ST6GALNAC2
SREBF1	STXBP1	ST7
SREBF2	STXBP2	STAM
SRF	SUCLG1	STAM2
SRRM1	SUCLG2	STAMBP
SRSF1	SUFU	STAP2
SRSF10	SULT1A1	STAT1
SRSF2	SULT1A2	STAT3
SRSF3	SUPV3L1	STAT5A
SRSF5	SUZ12	STAT5B
SRSF6	SWAP70	STAT6
SRSF8	SYF2	STK10
SRSF9	SYK	STK11
SRY	SYNE2	STK17A
SS18L1	SYNGR3	STK19
SSB	SYPL1	STK24
SSBP2	TAF15	STK25
SSBP3	TAOK2	STK3
SSBP4	TAOK3	STK33
SSRP1	TARBP1	STK38
SSX1	TARS	STK38L
SSX2	TATDN2	STK39
SSX3	TBC1D15	STMN1
SSX4	TBC1D9B	STUB1
SSX5	TBCB	STX1A
ST18	TBK1	STX4
STAT1	TBP	STXBP1
STAT2	TBPL1	STXBP2
STAT3	TBX2	SUCLG1
STAT4	TBX3	SUCLG2
STAT5A	TBXA2R	SUFU
STAT5B	TCEA1	SULT1A1
STAT6	TCEA2	SULT1A2
STON1-GTF2A1L	TCEAL4	SUPV3L1
STRN3	TCEB3	SUZ12
SUB1	TCERG1	SWAP70
SUFU	TCF12	SYK
SUGP1	TCF7L2	SYNE2
SUGP2	TCFL5	SYNGR3
SUPT16H	TCIRG1	SYPL1
SUPT3H	TCTA	TAF15
SUPT4H1	TCTN1	TAGAP
SUPT5H	TDRD3	TAL1
SUPT6H	TEK	TAOK2
SUPT7L	TERF2IP	TAOK3
SUV39H2	TES	TARS
SUZ12	TESK1	TATDN2
T	TEX10	TBC1D15
TADA2A	TFAP2A	TBC1D9B
TADA3	TFCP2	TBCB
TAF1	TFDP1	TBK1
TAF10	TFE3	TBP
TAF11	TFF1	TBPL1
TAF12	TFG	TBX2
TAF13	TFPI	TBX3
TAF15	TGDS	TBXA2R
TAF1A	TGFB1	TCEA1
TAF1B	TGFBR1	TCEA2
TAF1C	TGFBR2	TCEAL4
TAF1D	THADA	TCEB3
TAF1L	THAP11	TCERG1
TAF2	THBS1	TCF12
TAF4	TIAM1	TCF3
TAF4B	TIMELESS	TCF7L2
TAF5	TIMM17B	TCFL5
TAF5L	TIMM22	TCIRG1
TAF6	TIMM9	TCTA
TAF6L	TIMP1	TCTN1
TAF7	TIMP2	TDRD3
TAF9	TIPARP	TEK
TAF9B	TJP1	TERF2IP
TAL1	TLE1	TES
TAL2	TLE3	TESK1
TARBP1	TLK2	TEX10
TARBP2	TLR8	TFAP2A
TARDBP	TM7SF2	TFCP2
TAX1BP3	TM9SF2	TFDP1
TBC1D22A	TM9SF3	TFE3
TBC1D2B	TMCO1	TFF1
TBL1X	TMED10	TFG
TBL1XR1	TMEM109	TFPI
TBP	TMEM110	TFRC
TBPL1	TMEM127	TGDS
TBPL2	TMEM154	TGFA
TBR1	TMEM174	TGFB1
TBX1	TMEM2	TGFBR1
TBX10	TMEM5	TGFBR2
TBX15	TMEM50A	THADA
TBX18	TMEM97	THAP11
TBX19	TNFAIP1	THBS1
TBX2	TNFAIP3	TIMELESS
TBX20	TNFRSF1A	TIMM17B
TBX21	TNFRSF21	TIMM22
TBX22	TNFSF4	TIMM9
TBX3	TNIP1	TIMP1
TBX4	TNKS2	TIMP2
TBX5	TOMM22	TIPARP
TBX6	TOMM34	TJP1
TCEA1	TOMM70A	TLE1
TCEA2	TOP1	TLE3
TCEA3	TOP2A	TLK2
TCEAL1	TOPBP1	TLR7
TCEANC	TOR1A	TLR8
TCEANC2	TP53	TM7SF2
TCEB1	TP53BP1	TM9SF2
TCEB2	TP53BP2	TM9SF3
TCEB3	TP53TG1	TMCO1
TCEB3B	TPD52L2	TMED10
TCEB3C	TPI1	TMEM109
TCERG1	TPM1	TMEM110
TCF12	TPMT	TMEM127
TCF15	TPR	TMEM154
TCF19	TRADD	TMEM174
TCF20	TRAFD1	TMEM2
TCF21	TRAK2	TMEM5
TCF23	TRAM2	TMEM50A
TCF25	TRAP1	TMEM97
TCF3	TRAPPC3	TNFAIP1
TCF4	TRAPPC6A	TNFAIP3
TCF7	TRIB1	TNFRSF10B
TCF7L1	TRIB3	TNFRSF1A
TCF7L2	TRIM13	TNFRSF21
TCFL5	TRIM2	TNFSF15
TCOF1	TRIM24	TNFSF4
TEAD1	TRIM27	TNFSF8
TEAD2	TRIP10	TNIP1
TEAD3	TRIP13	TNKS2
TEAD4	TSC1	TOMM22
TEF	TSC2	TOMM34
TFAM	TSC22D3	TOMM70A
TFAP2A	TSEN2	TOP1
TFAP2B	TSKU	TOP2A
TFAP2C	TSN	TOPBP1
TFAP2D	TSPAN3	TP53
TFAP2E	TSPAN4	TP53BP1
TFAP4	TSPAN6	TP53BP2
TFCP2	TSPAN8	TP53TG1
TFCP2L1	TSTA3	TPD52L2
TFDP1	TTC3	TPI1
TFDP2	TTF1	TPM1
TFDP3	TTK	TPMT
TFE3	TUBB2A	TPR
TFEB	TUBB2C	TRADD
TFEC	TUBB3	TRAFD1
TFPT	TUBB6	TRAK2
TGFB1I1	TWF2	TRAM2
TGIF1	TXLNA	TRAP1
TGIF2	TXNDC9	TRAPPC3
TGIF2LX	TXNL4B	TRAPPC6A
TGIF2LY	TXNRD1	TRIB1
TH1L	TYK2	TRIB3
THAP1	TYMS	TRIM13
THAP11	UBAP1	TRIM2
THAP7	UBAP2L	TRIM24
THOC1	UBASH3A	TRIM27
THRA	UBE2A	TRIM38
THRAP3	UBE2C	TRIP10
THRB	UBE2D1	TRIP13
TIAL1	UBE2D3	TSC1
TIGD4	UBE2E3	TSC2
TIMELESS	UBE2J1	TSC22D3
TLE1	UBE2L6	TSEN2
TLE2	UBE3B	TSKU
TLE3	UBE3C	TSN
TLE6	UBE4A	TSPAN3
TLX1	UBL5	TSPAN4
TLX2	UBQLN2	TSPAN6
TLX3	UBR7	TSPAN8
TMF1	UCK2	TSTA3
TNFAIP3	UFM1	TTC3
TOB1	UGDH	TTF1
TOE1	UGP2	TTK
TONSL	UNC13B	TUBB2A
TOP2B	UQCRFS1	TUBB2C
TOPORS	USP1	TUBB3
TOX	USP12	TUBB6
TOX2	USP14	TWF2
TOX3	USP16	TXLNA
TOX4	USP20	TXNDC9
TP53	USP22	TXNIP
TP53BP1	USP6NL	TXNL4B
TP63	USP7	TXNRD1
TP73	UTP14A	TYK2
TPRX1	UTP18	TYMS
TRAFD1	UVRAG	UBAP2L
TRERF1	UXT	UBASH3A
TRIB3	VAMP7	UBE2A
TRIM15	VAPB	UBE2C
TRIM16	VAT1	UBE2D1
TRIM21	VAV3	UBE2D3
TRIM22	VDAC1	UBE2E3
TRIM24	VDR	UBE2L6
TRIM25	VEGFA	UBE3B
TRIM27	VGLL4	UBE3C
TRIM28	VHL	UBE4A
TRIM29	VKORC1	UBQLN2
TRIM31	VPS26A	UCK2
TRIM32	VPS28	UGDH
TRIM33	VPS72	UGP2
TRIM5	VPS8	UNC13B
TRIP11	VRK2	UQCRFS1
TRIP13	VRK3	USP1
TRIP4	WASF3	USP12
TRIP6	WDR6	USP14
TRPS1	WDR61	USP20
TRRAP	WDR67	USP22
TSC22D1	WDR7	USP6NL
TSC22D2	WDTC1	USP7
TSC22D3	WEE1	UTP14A
TSC22D4	WFS1	UTP18
TSG101	WHSC1	UVRAG
TSHZ1	WIPF2	UXT
TSHZ2	WNT1	VAMP7
TSHZ3	WNT10B	VAPB
TTF2	WNT5A	VAT1
TUB	WRB	VAV3
TULP3	WRN	VDAC1
TULP4	WT1	VDR
TWIST1	WWOX	VEGFA
TWIST2	XBP1	VGLL4
UBE2K	XPC	VHL
UBN1	XPNPEP1	VKORC1
UBP1	XPNPEP3	VPS26A
UBTF	XPO7	VPS28
UHRF1	XRCC5	VPS72
UIMC1	YAP1	VPS8
UNCX	YES1	VRK1
UPF1	YKT6	VRK2
USF1	YME1L1	VRK3
USF2	YTHDF1	WASF3
UTF1	YTHDF2	WDR6
VAV1	YWHAH	WDR61
VAX1	YWHAZ	WDR67
VAX2	YY1	WDR7
VCY	ZAK	WDTC1
VDR	ZAP70	WEE1
VENTX	ZBTB24	WFS1
VEZF1	ZBTB25	WHSC1
VGLL1	ZBTB46	WIPF2
VGLL2	ZBTB5	WNT1
VHL	ZC3H4	WNT10B
VPS72	ZDHHC6	WNT5A
VSX1	ZER1	WRB
VSX2	ZFP161	WRN
WBP11	ZFP36	WT1
WDHD1	ZFX	WTAP
WHSC1	ZGPAT	WWOX
WHSC1L1	ZMIZ1	XBP1
WHSC2	ZMIZ2	XPC
WIZ	ZMPSTE24	XPNPEP3
WT1	ZMYM2	XPO7
WWP1	ZNF131	XRCC5
WWTR1	ZNF134	YAP1
XAB2	ZNF143	YBX1
XBP1	ZNF207	YES1
XPC	ZNF217	YKT6
XRCC3	ZNF274	YME1L1
XRCC5	ZNF318	YTHDF1
XRCC6	ZNF331	YTHDF2
YAF2	ZNF395	YWHAH
YBX1	ZNF451	YWHAZ
YBX2	ZNF586	YY1
YEATS2	ZNF589	ZAK
YEATS4	ZNF629	ZAP70
YTHDC1	ZNF669	ZBTB24
YY1	ZNF672	ZBTB25
YY2	ZNF692	ZBTB46
ZBBX	ZNF768	ZBTB5
ZBED1	ZNHIT3	ZC3H4
ZBED2	ZRSR2	ZDHHC6
ZBED3	ZW10	ZER1
ZBED4		ZFP161
ZBTB1		ZFP36
ZBTB10		ZFX
ZBTB11		ZGPAT
ZBTB12		ZMIZ1
ZBTB16		ZMIZ2
ZBTB17		ZMPSTE24
ZBTB2		ZMYM2
ZBTB20		ZNF131
ZBTB22		ZNF134
ZBTB24		ZNF143
ZBTB25		ZNF207
ZBTB26		ZNF217
ZBTB3		ZNF274
ZBTB32		ZNF300
ZBTB33		ZNF318
ZBTB34		ZNF331
ZBTB37		ZNF365
ZBTB38		ZNF384
ZBTB39		ZNF395
ZBTB4		ZNF451
ZBTB40		ZNF586
ZBTB41		ZNF589
ZBTB43		ZNF629
ZBTB44		ZNF669
ZBTB45		ZNF672
ZBTB46		ZNF768
ZBTB47		ZPBP2
ZBTB48		ZW10
ZBTB49
ZBTB5
ZBTB6
ZBTB7A
ZBTB7B
ZBTB7C
ZBTB8A
ZBTB8B
ZBTB8OS
ZBTB9
ZC3H10
ZC3H11A
ZC3H12A
ZC3H12B
ZC3H12C
ZC3H12D
ZC3H13
ZC3H14
ZC3H15
ZC3H18
ZC3H3
ZC3H4
ZC3H6
ZC3H7A
ZC3H7B
ZC3H8
ZC3HAV1
ZC3HAV1L
ZC3HC1
ZC4H2
ZCCHC10
ZCCHC11
ZCCHC12
ZCCHC13
ZCCHC14
ZCCHC16
ZCCHC17
ZCCHC2
ZCCHC24
ZCCHC3
ZCCHC4
ZCCHC5
ZCCHC6
ZCCHC7
ZCCHC8
ZCCHC9
ZCRB1
ZCWPW1
ZCWPW2
ZDBF2
ZDHHC1
ZDHHC11
ZDHHC12
ZDHHC13
ZDHHC14
ZDHHC15
ZDHHC16
ZDHHC17
ZDHHC18
ZDHHC19
ZDHHC2
ZDHHC20
ZDHHC21
ZDHHC22
ZDHHC23
ZDHHC24
ZDHHC3
ZDHHC4
ZDHHC5
ZDHHC6
ZDHHC7
ZDHHC8
ZDHHC9
ZEB1
ZEB2
ZFAND1
ZFAND2A
ZFAND2B
ZFAND3
ZFAND5
ZFAND6
ZFAT
ZFC3H1
ZFHX3
ZFHX4
ZFP1
ZFP106
ZFP112
ZFP14
ZFP161
ZFP2
ZFP28
ZFP3
ZFP30
ZFP36
ZFP36L1
ZFP36L2
ZFP37
ZFP41
ZFP42
ZFP57
ZFP62
ZFP64
ZFP82
ZFP90
ZFP91
ZFP92
ZFPL1
ZFPM1
ZFPM2
ZFR
ZFR2
ZFX
ZFY
ZFYVE1
ZFYVE16
ZFYVE19
ZFYVE20
ZFYVE21
ZFYVE26
ZFYVE27
ZFYVE28
ZFYVE9
ZGLP1
ZGPAT
ZHX1
ZHX2
ZHX3
ZIC1
ZIC2
ZIC3
ZIC4
ZIC5
ZIK1
ZIM2
ZIM3
ZKSCAN1
ZKSCAN2
ZKSCAN3
ZKSCAN4
ZKSCAN5
ZMAT1
ZMAT2
ZMAT3
ZMAT4
ZMAT5
ZMIZ1
ZMIZ2
ZMYM1
ZMYM2
ZMYM3
ZMYM4
ZMYM5
ZMYM6
ZMYND10
ZMYND11
ZMYND12
ZMYND15
ZMYND19
ZMYND8
ZNF10
ZNF100
ZNF101
ZNF107
ZNF114
ZNF117
ZNF12
ZNF121
ZNF124
ZNF131
ZNF132
ZNF133
ZNF134
ZNF135
ZNF136
ZNF137P
ZNF138
ZNF14
ZNF140
ZNF141
ZNF142
ZNF143
ZNF146
ZNF148
ZNF154
ZNF155
ZNF157
ZNF16
ZNF160
ZNF165
ZNF167
ZNF169
ZNF17
ZNF174
ZNF175
ZNF177
ZNF18
ZNF180
ZNF181
ZNF182
ZNF184
ZNF185
ZNF187
ZNF189
ZNF19
ZNF192
ZNF193
ZNF195
ZNF197
ZNF2
ZNF20
ZNF200
ZNF202
ZNF204P
ZNF205
ZNF207
ZNF208
ZNF211
ZNF212
ZNF213
ZNF214
ZNF215
ZNF217
ZNF219
ZNF22
ZNF221
ZNF222
ZNF223
ZNF224
ZNF225
ZNF226
ZNF227
ZNF229
ZNF23
ZNF230
ZNF232
ZNF233
ZNF234
ZNF235
ZNF236
ZNF238
ZNF239
ZNF24
ZNF248
ZNF25
ZNF250
ZNF251
ZNF253
ZNF254
[truncated: 448 more rows]

## Sheet: ARACNe interactome
Transcription Factor	Target
AATF	ACACA
AATF	ALDOC
AATF	ANKRD13B
AATF	ATXN7L3
AATF	C10orf2
AATF	C17orf79
AATF	CBX8
AATF	CCDC137
AATF	CDK5RAP3
AATF	COASY
AATF	CWC25
AATF	DBF4B
AATF	DDX52
AATF	DHRS11
AATF	DHRS13
AATF	DNAJC7
AATF	DRG2
AATF	DUSP14
AATF	EEF1A1
AATF	EFTUD2
AATF	EPN3
AATF	ERAL1
AATF	FADD
AATF	FBF1
AATF	FLOT2
AATF	FN3K
AATF	FTSJ3
AATF	GGNBP2
AATF	GIT1
AATF	GPKOW
AATF	GPS1
AATF	GRB7
AATF	GTPBP5
AATF	HCN3
AATF	ICT1
AATF	JUP
AATF	KAT2A
AATF	KIAA0319
AATF	KRT19
AATF	LAS1L
AATF	LEPREL4
AATF	LIG3
AATF	LRRC59
AATF	MED24
AATF	MRM1
AATF	MRPL27
AATF	MRPS23
AATF	MYO19
AATF	NLE1
AATF	NME1
AATF	NME2
AATF	NPEPL1
AATF	NT5C3L
AATF	PELP1
AATF	PHB
AATF	PHF23
AATF	PIGW
AATF	POLDIP2
AATF	PPP1R9B
AATF	PRIC285
AATF	PSMB3
AATF	PSMC3IP
AATF	PSMC5
AATF	PSMD11
AATF	PSMD3
AATF	PSME3
AATF	RAB11FIP4
AATF	RAB34
AATF	RAD51D
AATF	RELL2
AATF	RNMTL1
AATF	RPL23P8
AATF	RUNDC3A
AATF	RUVBL1
AATF	SCGB3A1
AATF	SENP3
AATF	SLC25A39
AATF	SLC35B1
AATF	SLC5A10
AATF	SNF8
AATF	STARD3
AATF	TACO1
AATF	TADA2A
AATF	TAF15
AATF	TMEM97
AATF	TMPRSS4
AATF	TP53I13
AATF	TRAF4
AATF	TUBG1
AATF	UBE2O
AATF	UNC119
AATF	UTP6
AATF	ZNF830
AATF	ZNHIT3
ABL1	AFAP1
ABL1	ARHGAP1
ABL1	ARHGEF17
ABL1	ARHGEF40
ABL1	BRD3
ABL1	C17orf103
ABL1	C1orf144
ABL1	CAMSAP1
ABL1	CIC
ABL1	CIZ1
ABL1	CRSP8P
ABL1	DAB2IP
ABL1	DBN1
ABL1	DCHS1
ABL1	DLGAP4
ABL1	ECE1
ABL1	EHMT1
ABL1	EVC
ABL1	FAM125B
ABL1	FKBP15
ABL1	FUBP3
ABL1	GPR107
ABL1	GTF3C4
ABL1	IGSF3
ABL1	KDM6B
ABL1	KLF7
ABL1	LOC100129034
ABL1	LOC90784
ABL1	LRP1
ABL1	LRRC8A
ABL1	MAML1
ABL1	MAPKBP1
ABL1	MED22
ABL1	MYH9
ABL1	NEK6
ABL1	NUP188
ABL1	NUP214
ABL1	PHC2
ABL1	PLCG1
ABL1	POLR3D
ABL1	POMT1
ABL1	PRRC2B
ABL1	PTPRG
ABL1	PTPRS
ABL1	PXDN
ABL1	RAPGEF1
ABL1	RBFOX2
ABL1	RBM15B
ABL1	RBMS2
ABL1	RGS3
ABL1	RXRA
ABL1	SEPT8
ABL1	SETX
ABL1	SKI
ABL1	SLC25A25
ABL1	SNX29
ABL1	SUFU
ABL1	TBC1D13
ABL1	TBC1D2
ABL1	TLN1
ABL1	TOR1A
ABL1	TRAM2
ABL1	TRIM32
ABL1	TRIO
ABL1	TSPAN9
ABL1	TTF1
ABL1	UCK1
ABL1	ULK1
ABL1	VAV2
ABL1	ZBED1
ABL1	ZBTB43
ABL1	ZCCHC24
ABL1	ZDHHC3
ABL1	ZNF618
ABL1	ZNF79
ABT1	ABCF1
ABT1	ACAD9
ABT1	C11orf84
ABT1	C6orf136
ABT1	CDKAL1
ABT1	CSNK2B
ABT1	DAZAP1
ABT1	DDX28
ABT1	DTNBP1
ABT1	GMNN
ABT1	GTF2H4
ABT1	HMGA1
ABT1	HMGN4
ABT1	HPRT1
ABT1	KLHDC3
ABT1	LSM2
ABT1	LYRM4
ABT1	MRPL2
ABT1	MRPL9
ABT1	MRPS18A
ABT1	MRS2
ABT1	MTCH1
ABT1	NFKBIE
ABT1	NOL7
ABT1	PAK1IP1
ABT1	PBX2
ABT1	POLR1C
ABT1	PRR3
ABT1	RDBP
ABT1	RPP21
ABT1	RPUSD2
ABT1	RPUSD3
ABT1	SNRPC
ABT1	TAF11
ABT1	TBC1D7
ABT1	TBCC
ABT1	TBRG4
ABT1	TEAD3
ABT1	TMEM14B
ABT1	TMEM14C
ABT1	TOMM6
ABT1	TRIM27
ABT1	TRIM38
ABT1	WRNIP1
ABT1	YARS2
ABT1	ZNRD1
ABTB1	ABCA7
ABTB1	ACAD9
ABTB1	ACADS
ABTB1	ACBD4
ABTB1	ADARB2
ABTB1	AIP
ABTB1	ALDH18A1
ABTB1	ARAP1
ABTB1	ARRDC2
ABTB1	ASMTL
ABTB1	BBC3
ABTB1	C11orf68
ABTB1	C16orf48
ABTB1	C16orf86
ABTB1	C17orf100
ABTB1	C17orf59
ABTB1	C17orf82
ABTB1	C1orf86
ABTB1	C7orf59
ABTB1	CALHM2
ABTB1	CARNS1
ABTB1	CBX7
ABTB1	CHAC2
ABTB1	CHADL
ABTB1	CHCHD6
ABTB1	CLEC3B
ABTB1	CNIH4
ABTB1	CNPY3
ABTB1	CROCC
ABTB1	CST3
ABTB1	CYTH2
ABTB1	DBNDD2
ABTB1	DBP
ABTB1	DCUN1D5
ABTB1	DPAGT1
ABTB1	DYRK1B
ABTB1	ECSIT
ABTB1	EEFSEC
ABTB1	EGFL8
ABTB1	EI24
ABTB1	EML3
ABTB1	EXOC3L1
ABTB1	FAM100A
ABTB1	FAM100B
ABTB1	FAM116B
ABTB1	FAM134A
ABTB1	FAM176B
ABTB1	FBXO44
ABTB1	FOXS1
ABTB1	FRS3
ABTB1	GATS
ABTB1	GGCT
ABTB1	GIGYF1
ABTB1	GIT1
ABTB1	GLTSCR2
ABTB1	GNAZ
ABTB1	GPANK1
ABTB1	GPIHBP1
ABTB1	GPR146
ABTB1	H1FX
ABTB1	H1FX-AS1
ABTB1	HAGH
ABTB1	HDAC10
ABTB1	HDAC5
ABTB1	HDAC7
ABTB1	HEXIM2
ABTB1	HMHA1
ABTB1	HPCA
ABTB1	HRC
ABTB1	HSD17B14
ABTB1	IGFBP6
ABTB1	ILDR1
ABTB1	ITGA3
ABTB1	KANK3
ABTB1	KCTD17
ABTB1	KLC4
ABTB1	KMO
ABTB1	LDHA
ABTB1	LOC728392
ABTB1	LPIN3
ABTB1	MAN2C1
ABTB1	MAP1LC3A
ABTB1	MAPRE3
ABTB1	MGLL
ABTB1	MYO15B
ABTB1	NPEPL1
ABTB1	NR1H2
ABTB1	NT5C
ABTB1	NTN5
ABTB1	NUDT15
ABTB1	PALM
ABTB1	PAOX
ABTB1	PCIF1
ABTB1	PGRMC1
ABTB1	PHF1
ABTB1	PHLDB3
ABTB1	PINK1
ABTB1	PKN1
ABTB1	PMM1
ABTB1	PPP1R12C
ABTB1	RAB7A
ABTB1	RASA4CP
ABTB1	RGS12
ABTB1	SCN1B
ABTB1	SELO
ABTB1	SEMA6C
ABTB1	SEPT4
ABTB1	SFI1
ABTB1	SH3GLB2
ABTB1	SHF
ABTB1	SIPA1
ABTB1	SLC16A11
ABTB1	SLC45A1
ABTB1	SLC5A10
ABTB1	SLMO1
ABTB1	SORBS3
ABTB1	SPSB3
ABTB1	TCEA2
ABTB1	TCEAL3
ABTB1	TCEAL5
ABTB1	TCEAL6
ABTB1	TFRC
ABTB1	TMEM115
ABTB1	TMEM44
ABTB1	TNFSF12
ABTB1	TNK2
ABTB1	TPRA1
ABTB1	UBAP1L
ABTB1	UBXN6
ABTB1	UCHL3
ABTB1	USF2
ABTB1	VPS28
ABTB1	WDR45
ABTB1	WDR81
ABTB1	YPEL3
ABTB1	ZNF575
ABTB1	ZNF653
ABTB1	ZNF853
ADNP	ACVR2B
ADNP	ADNP2
ADNP	ALMS1
ADNP	AMMECR1L
ADNP	AP3M1
ADNP	ARFGEF2
ADNP	ARID2
ADNP	ARID3A
ADNP	ATP9A
ADNP	BIRC6
ADNP	BPTF
ADNP	C12orf51
ADNP	C20orf111
ADNP	C20orf94
ADNP	CAND1
ADNP	CELF1
ADNP	CEP97
ADNP	CHD4
ADNP	CHD6
ADNP	CHD8
ADNP	CPSF6
ADNP	CREB1
ADNP	CSNK2A1
ADNP	CSNK2A1P
ADNP	CSRP2BP
ADNP	CSTF1
ADNP	DCAF12
ADNP	DCLRE1A
ADNP	DDB1
ADNP	DDX46
ADNP	DHX35
ADNP	DIDO1
ADNP	DNAJC14
ADNP	DPM1
ADNP	DPY19L4
ADNP	DROSHA
ADNP	EPB41L5
ADNP	EPT1
ADNP	FAM217B
ADNP	FBXO21
ADNP	FLVCR1
ADNP	GABPB1
ADNP	GEMIN5
ADNP	GMCL1
ADNP	GRHL2
ADNP	GSK3B
ADNP	GTF3C3
ADNP	GXYLT1
ADNP	HLTF
ADNP	IFT52
ADNP	ITCH
ADNP	KIF3B
ADNP	KLHDC10
ADNP	LMBR1
ADNP	LMTK2
ADNP	LOC647979
ADNP	MARCH6
ADNP	MATR3
ADNP	MBTD1
ADNP	MED14
ADNP	MOCS3
ADNP	N4BP2
ADNP	NAA25
ADNP	NCOA3
ADNP	NCOA5
ADNP	NCOA6
ADNP	NSD1
ADNP	NUP153
ADNP	NUP155
ADNP	OSBPL2
ADNP	PARG
ADNP	PCMTD2
ADNP	PDS5A
ADNP	PHF20
ADNP	POLA1
ADNP	PRDM10
ADNP	PRPF40A
ADNP	PRR5-ARHGAP8
ADNP	PTGES3
ADNP	PTPN1
ADNP	RAB22A
ADNP	RALGAPB
ADNP	RBL1
ADNP	RBM12
ADNP	RBM12B
ADNP	REST
ADNP	RFC1
ADNP	RMND5A
ADNP	RPRD1B
ADNP	SENP1
ADNP	SENP2
ADNP	SIX4
ADNP	SLC9A8
ADNP	SLMO2
ADNP	SMC3
ADNP	SMG7
ADNP	SOGA1
ADNP	SPATA2
ADNP	STAM
ADNP	STAU1
ADNP	SUV420H1
ADNP	TAF1L
ADNP	TAF4
ADNP	TARDBP
ADNP	TFCP2
ADNP	TMEM194A
ADNP	TOP1
ADNP	TOP1P1
ADNP	TP53RK
ADNP	TTC26
ADNP	TTI1
ADNP	TTPAL
ADNP	TYW5
ADNP	USP37
ADNP	USP46
ADNP	VAPB
ADNP	WAC
ADNP	XRN2
ADNP	YTHDC1
ADNP	YWHAB
ADNP	ZBTB11
ADNP	ZBTB26
ADNP	ZFP30
ADNP	ZFP64
ADNP	ZNF217
ADNP	ZNF28
ADNP	ZNF611
ADNP	ZNF623
ADNP	ZNF664
ADNP	ZNF845
ADNP2	ADNP
ADNP2	CELF1
ADNP2	GTF3C4
ADNP2	HCFC1
ADNP2	MIB1
ADNP2	MKLN1
ADNP2	PIAS2
ADNP2	PIGN
ADNP2	PIK3C3
ADNP2	RBM12
ADNP2	RNMT
ADNP2	SMAD2
ADNP2	SMAD4
ADNP2	TIMM21
ADNP2	TRRAP
ADNP2	VPS4B
ADNP2	WAC
ADNP2	ZCCHC2
ADNP2	ZNF407
AEBP1	ABHD4
AEBP1	ADAM12
AEBP1	ADAMTS14
AEBP1	ADAMTS2
AEBP1	ADAMTS7
AEBP1	ADAMTSL2
AEBP1	ADORA3
AEBP1	ALDH1B1
AEBP1	ANGPTL2
AEBP1	ANTXR1
AEBP1	APBA2
AEBP1	APCDD1L
AEBP1	APLN
AEBP1	ARSE
AEBP1	ARSI
AEBP1	ASPN
AEBP1	BEAN1
AEBP1	BGN
AEBP1	BMP1
AEBP1	C10orf55
AEBP1	C11orf24
AEBP1	C11orf68
AEBP1	C14orf37
AEBP1	C1QTNF3
AEBP1	C1QTNF6
AEBP1	C7orf10
AEBP1	CAPZB
AEBP1	CCIN
AEBP1	CD276
AEBP1	CD55
AEBP1	CD99
AEBP1	CDH11
AEBP1	CDH15
AEBP1	CDR2L
AEBP1	CERCAM
AEBP1	CHPF
AEBP1	CHPF2
AEBP1	CHRD
AEBP1	CHRNA1
AEBP1	CHST13
AEBP1	CILP2
AEBP1	CLEC11A
AEBP1	CLTCL1
AEBP1	CMTM3
AEBP1	CNPY4
AEBP1	COL10A1
AEBP1	COL11A1
AEBP1	COL12A1
AEBP1	COL1A1
AEBP1	COL1A2
AEBP1	COL22A1
AEBP1	COL3A1
AEBP1	COL5A1
AEBP1	COL5A2
AEBP1	COL5A3
AEBP1	COL6A1
AEBP1	COL6A2
AEBP1	COL6A3
AEBP1	COL8A1
AEBP1	COL8A2
AEBP1	COMP
AEBP1	COPZ2
AEBP1	CORIN
AEBP1	CPN2
AEBP1	CPZ
AEBP1	CRYBB1
AEBP1	CSDC2
AEBP1	CSMD2
AEBP1	CTHRC1
AEBP1	CTSK
AEBP1	CYS1
AEBP1	DACT1
AEBP1	DAPK3
AEBP1	DBF4
AEBP1	DCN
AEBP1	DKK3
AEBP1	DLX5
AEBP1	DPYSL3
AEBP1	DPYSL4
AEBP1	DRD4
AEBP1	ECM1
AEBP1	EFEMP2
AEBP1	EMILIN1
AEBP1	EN1
AEBP1	EXTL1
AEBP1	F13A1
AEBP1	FAM101A
AEBP1	FAM19A5
AEBP1	FAM26E
AEBP1	FAP
AEBP1	FAT3
AEBP1	FBN1
AEBP1	FEZ1
AEBP1	FIBIN
AEBP1	FKBP10
AEBP1	FLNA
AEBP1	FN1
AEBP1	FNDC1
AEBP1	FST
AEBP1	FSTL3
AEBP1	GJB2
AEBP1	GLIS2
AEBP1	GLT25D1
AEBP1	GLT8D2
AEBP1	GPR68
AEBP1	GREM1
AEBP1	GRP
AEBP1	HECW1
AEBP1	HHIPL1
AEBP1	HMP19
AEBP1	HOXA11
AEBP1	HOXA11-AS
AEBP1	HOXB5
AEBP1	HOXB6
AEBP1	HOXC8
AEBP1	HS3ST3A1
AEBP1	HSD17B14
AEBP1	HSD17B6
AEBP1	HTRA1
AEBP1	HTRA3
AEBP1	IFFO1
AEBP1	IL11
AEBP1	ILK
AEBP1	INHBA
AEBP1	INSRR
AEBP1	ISLR
AEBP1	ITGA11
AEBP1	ITGA5
AEBP1	ITGB5
AEBP1	ITGBL1
AEBP1	JPH3
AEBP1	KIAA1199
AEBP1	KIF26B
AEBP1	KLK4
AEBP1	KLKP1
AEBP1	LEPRE1
AEBP1	LEPREL2
AEBP1	LGALS1
AEBP1	LMCD1
AEBP1	LOC283867
AEBP1	LOX
AEBP1	LOXL1
AEBP1	LOXL2
AEBP1	LRP1
AEBP1	LRRC15
AEBP1	LUM
AEBP1	LY6H
AEBP1	MAGEL2
AEBP1	MAN1B1
AEBP1	MEGF6
AEBP1	MEIS3
AEBP1	MFAP2
AEBP1	MFAP5
AEBP1	MFGE8
AEBP1	MFRP
AEBP1	MMP11
AEBP1	MMP14
AEBP1	MMP2
AEBP1	MRC2
AEBP1	MSC
AEBP1	MXRA5
AEBP1	MXRA8
AEBP1	MYH13
AEBP1	MYL6
AEBP1	NBL1
AEBP1	NDN
AEBP1	NID1
AEBP1	NINJ2
AEBP1	NKAIN4
AEBP1	NKX3-2
AEBP1	NKX6-1
AEBP1	NLRP12
AEBP1	NNMT
AEBP1	NOX4
AEBP1	NTM
AEBP1	NTNG2
AEBP1	NUDT10
AEBP1	ODZ4
AEBP1	OLFML2B
AEBP1	P4HA3
AEBP1	PCOLCE
AEBP1	PDGFRB
AEBP1	PDLIM7
AEBP1	PDPN
AEBP1	PITX2
AEBP1	PLA2G15
AEBP1	PLA2G5
AEBP1	PLAT
AEBP1	PLAU
AEBP1	PLIN3
AEBP1	PLOD1
AEBP1	PMEPA1
AEBP1	PODN
AEBP1	PODNL1
AEBP1	POSTN
AEBP1	PPAPDC1A
AEBP1	PPAPDC3
AEBP1	PPEF1
AEBP1	PPP1R3G
AEBP1	PROC
AEBP1	PRRX1
AEBP1	PRRX2
AEBP1	PRSS23
AEBP1	PTGIR
AEBP1	PTRF
AEBP1	RAB3IL1
AEBP1	RARRES2
AEBP1	RCN3
AEBP1	ROR2
AEBP1	RPLP0P2
AEBP1	RPSAP52
AEBP1	RRAS
AEBP1	SALL1
AEBP1	SALL4
AEBP1	SAMD14
AEBP1	SCARF2
AEBP1	SCT
AEBP1	SDC1
AEBP1	SERPINF1
AEBP1	SERPINH1
AEBP1	SFRP2
AEBP1	SGIP1
AEBP1	SLC16A3
AEBP1	SLC38A5
AEBP1	SPARC
AEBP1	SPHK1
AEBP1	SPOCD1
AEBP1	SPOCK1
AEBP1	SPON2
AEBP1	SPSB1
AEBP1	SPSB4
AEBP1	SRPX2
AEBP1	SSC5D
AEBP1	ST6GAL2
AEBP1	ST6GALNAC5
AEBP1	SULF1
AEBP1	SULF2
AEBP1	SYDE1
AEBP1	SYNDIG1
AEBP1	TAGLN
AEBP1	TBC1D2
AEBP1	TBX5
AEBP1	TGFB1I1
AEBP1	THBS2
AEBP1	THY1
AEBP1	TIMP2
AEBP1	TIMP3
AEBP1	TLL2
AEBP1	TM6SF2
AEBP1	TMED9
AEBP1	TMEM158
AEBP1	TMEM8A
AEBP1	TPM2
AEBP1	TREM2
AEBP1	UBTD1
AEBP1	UCHL1
AEBP1	UNC5B
AEBP1	VCAN
AEBP1	VEGFB
AEBP1	WNT2
AEBP1	WNT5B
AEBP1	ZNF668
AEBP2	ARL6IP6
AEBP2	ATF1
AEBP2	CCDC91
AEBP2	CMAS
AEBP2	CREBL2
AEBP2	DDX47
AEBP2	DERA
AEBP2	DNM1L
AEBP2	ERGIC2
AEBP2	ETNK1
AEBP2	FAM116A
AEBP2	FGFR1OP2
AEBP2	FOXN2
AEBP2	GOLT1B
AEBP2	IFT80
AEBP2	IPO8
AEBP2	KDM5A
AEBP2	KIAA0528
AEBP2	KRAS
AEBP2	LRP6
AEBP2	MED21
AEBP2	PCNP
AEBP2	PHC1
AEBP2	PLEKHA5
AEBP2	PYROXD1
AEBP2	RECQL
AEBP2	RIMKLB
AEBP2	SMAD4
AEBP2	SMC5
AEBP2	SNAPC1
AEBP2	STRAP
AEBP2	TAS2R20
AEBP2	TRMT11
AEBP2	TWISTNB
AEBP2	WBP11
AEBP2	ZFR
AEBP2	ZNF384
AES	ALKBH7
AES	AMH
AES	ATG4D
AES	ATP5D
AES	BSG
AES	BTBD2
AES	C19orf25
AES	C19orf43
AES	C19orf6
AES	C9orf16
AES	CACTIN
AES	CAMSAP3
AES	CCDC94
AES	EIF3E
AES	ELOF1
AES	FAM108A1
AES	FKBP8
AES	FZR1
AES	GDI1
AES	GPX4
AES	GTF2F1
AES	HMG20B
AES	HNRNPA0
AES	LOC113230
AES	MAP1LC3A
AES	MED16
AES	MIDN
AES	MKNK2
AES	MPND
AES	MRPL15
AES	MRPL34
AES	MRPL54
AES	NUDCD1
AES	OAZ1
AES	PIP5K1C
AES	POLR2E
AES	PTDSS1
AES	R3HDM4
AES	RAVER1
AES	REEP6
AES	RHBDD2
AES	RIPK2
AES	RPS15
AES	SCAMP4
AES	SF3A2
AES	SGTA
AES	SIRT6
AES	SLC39A3
AES	SPDYC
AES	STAP2
AES	STK11
AES	TATDN1
AES	TLE2
AES	UQCR11
AES	WBP1
AES	XAB2
AES	XPOT
AES	ZNF358
AES	ZNF414
AES	ZNF428
AFF1	AASDH
AFF1	ACER2
AFF1	AKAP5
AFF1	AP1AR
AFF1	APPL2
AFF1	ARFIP1
AFF1	ARHGEF38
AFF1	C4orf29
AFF1	C4orf34
AFF1	C4orf36
AFF1	C6orf108
AFF1	CADPS2
AFF1	CASC4
AFF1	CBR4
AFF1	CCDC111
AFF1	CCNG2
AFF1	CNOT6L
AFF1	COL4A3BP
AFF1	CPEB3
AFF1	CPEB4
AFF1	CREBRF
AFF1	CSNK1G1
AFF1	CTSO
AFF1	DNAJB14
AFF1	DNAJC16
AFF1	EIF4G3
AFF1	ELF2
AFF1	ELMOD2
AFF1	ERBB2IP
AFF1	ETFDH
AFF1	FAM179B
AFF1	FAM214A
AFF1	FARP2
AFF1	FBXL5
AFF1	FBXO8
AFF1	FNIP1
AFF1	FRS2
AFF1	FRYL
AFF1	FYCO1
AFF1	GIGYF2
AFF1	GOLGA1
AFF1	GSTCD
AFF1	IL6ST
AFF1	INPP4B
AFF1	INTS12
AFF1	ITPR1
AFF1	KIAA0232
AFF1	KIAA0494
AFF1	KIAA1109
AFF1	KIAA1430
AFF1	LAMTOR3
AFF1	LIMA1
AFF1	LRRFIP1
AFF1	MAP3K1
AFF1	METTL14
AFF1	MKL2
AFF1	MMAA
AFF1	NCEH1
AFF1	NEK1
AFF1	NRIP1
AFF1	PAFAH2
AFF1	PAPSS1
AFF1	PDIK1L
AFF1	PIP4K2A
AFF1	POLK
AFF1	PTPN13
AFF1	RAB27B
AFF1	RAB33B
AFF1	RAD50
AFF1	RBM43
AFF1	RBM47
AFF1	RHOH
AFF1	SCARB2
AFF1	SCN7A
AFF1	SEC24B
AFF1	SEMA3C
AFF1	SEPSECS
AFF1	SETD7
AFF1	SH3D19
AFF1	SHROOM3
AFF1	SLAIN2
AFF1	SNAP23
AFF1	SNX25
AFF1	SORL1
AFF1	SP1
AFF1	SPG11
AFF1	SPOPL
AFF1	SREK1
AFF1	STAM2
AFF1	TAB3
AFF1	TET2
AFF1	TIPARP
AFF1	TLR3
AFF1	TMEM184C
AFF1	TP53INP1
AFF1	TTBK2
AFF1	UBR1
AFF1	UGCG
AFF1	UGDH
AFF1	USP53
AFF1	WDFY3
AFF1	XIAP
AFF1	YTHDC1
AFF1	YTHDC2
AFF1	ZMYM6
AFF1	ZNF484
AFF1	ZNRF2
AFF3	ABCD3
AFF3	ABLIM3
AFF3	ACADSB
AFF3	ACBD4
AFF3	ACE2
AFF3	ADD1
AFF3	AGBL2
AFF3	AGTR1
AFF3	AKR7L
AFF3	AMDHD1
AFF3	ANKRD29
AFF3	ANXA6
AFF3	APBB2
AFF3	ARRB1
AFF3	ARSG
AFF3	ASB16
AFF3	ASCL1
AFF3	ASS1
AFF3	ASTN2
AFF3	ATP6AP1
AFF3	ATP6V1G1
AFF3	B3GNT4
AFF3	BAIAP2
AFF3	BCAM
AFF3	BCAS3
AFF3	BCL2
AFF3	BHLHE40
AFF3	C10orf82
AFF3	C17orf58
AFF3	C1orf168
AFF3	C2orf15
AFF3	C4orf34
AFF3	C5orf30
AFF3	C6orf203
AFF3	C8orf86
AFF3	CA9
AFF3	CABP4
AFF3	CACNA2D2
AFF3	CACNG4
AFF3	CADM2
AFF3	CALML5
AFF3	CALR
AFF3	CANT1
AFF3	CBR3
AFF3	CCND1
AFF3	CD22
AFF3	CDHR3
AFF3	CDK17
AFF3	CEBPB
AFF3	CETN3
AFF3	CHAD
AFF3	CHD6
AFF3	CHST15
AFF3	CIAO1
AFF3	CLSTN2
AFF3	CMBL
AFF3	CNNM3
AFF3	COX6C
AFF3	CPEB2
AFF3	CPLX1
AFF3	CST9
AFF3	CSTB
AFF3	CUX1
AFF3	CXorf40A
AFF3	CXXC5
AFF3	DACH1
AFF3	DCUN1D5
AFF3	DEGS1
AFF3	DNAJA4
AFF3	DNAJC12
AFF3	DNMBP
AFF3	EBF4
AFF3	EEF1A2
AFF3	EFNA4
AFF3	EFR3B
AFF3	EID1
AFF3	ELOVL2
AFF3	ENO1
AFF3	ERBB4
AFF3	ESR1
AFF3	FAAH2
AFF3	FAM134A
AFF3	FAM135B
AFF3	FAM174A
AFF3	FAM174B
AFF3	FAM196A
AFF3	FBP1
AFF3	FBXL5
AFF3	FBXO36
AFF3	FCRLB
AFF3	FGD1
AFF3	FGD3
AFF3	FGFR3
AFF3	FLJ10038
AFF3	FLJ35390
AFF3	FLJ42289
AFF3	FRAT1
AFF3	FSIP1
AFF3	FUT3
AFF3	FUT6
AFF3	FXYD5
AFF3	G6PC3
AFF3	GAMT
AFF3	GATA3
AFF3	GLS2
AFF3	GLYATL2
AFF3	GNPDA2
AFF3	GPR110
AFF3	GRB2
AFF3	GREB1
AFF3	GSDMC
AFF3	HABP2
AFF3	HDGFRP3
AFF3	HEBP1
AFF3	HIST4H4
AFF3	HIVEP3
AFF3	HSD17B2
AFF3	HTR7P1
AFF3	ICA1L
AFF3	ICAM1
AFF3	IGDCC3
AFF3	IGF1R
AFF3	IL12A
AFF3	ILDR1
AFF3	IRX5
AFF3	ISOC1
AFF3	ITIH6
AFF3	KAT6B
AFF3	KCNJ3
AFF3	KCNS1
AFF3	KDM4B
AFF3	KIAA0319L
AFF3	KIAA1324L
AFF3	KRT6A
AFF3	KRT7
AFF3	LAMA3
AFF3	LCN2
AFF3	LCT
AFF3	LDOC1
AFF3	LETM1
AFF3	LGALS3
AFF3	LINC00515
AFF3	LOC100134229
AFF3	LOC285593
AFF3	LRBA
AFF3	LYPD6B
AFF3	MAGED2
AFF3	MAST1
AFF3	MDP1
AFF3	MFSD2A
AFF3	MKL2
AFF3	MOAP1
AFF3	MPZL2
AFF3	MRFAP1
AFF3	MRFAP1L1
AFF3	MRPL10
AFF3	MYT1
AFF3	NAGS
AFF3	NCCRP1
AFF3	NECAB3
AFF3	NEDD4L
AFF3	NEURL
AFF3	NKAIN1
AFF3	NOVA1
AFF3	NUMA1
AFF3	NWD1
AFF3	NXPH3
AFF3	ORM1
AFF3	ORMDL3
AFF3	P4HTM
AFF3	PAH
AFF3	PAX2
AFF3	PDZK1IP1
AFF3	PERP
AFF3	PFKP
AFF3	PGBD1
AFF3	PGR
AFF3	PHF21B
AFF3	PHGR1
AFF3	PHLDB3
AFF3	PISD
AFF3	PLA2G12A
AFF3	PLCD4
AFF3	PNPLA4
AFF3	PRRT3
AFF3	PRSS23
AFF3	PRTG
AFF3	PSMB4
AFF3	RAB17
AFF3	RAB3A
AFF3	RALGAPA1
AFF3	RAP1GDS1
AFF3	RBM24
AFF3	RELL1
AFF3	RERG
AFF3	RET
AFF3	REXO2
AFF3	RGS22
AFF3	RHOH
AFF3	RNF14
AFF3	RNF157
AFF3	RNF183
AFF3	RNF43
AFF3	RP1
AFF3	RPH3AL
AFF3	S100A11
AFF3	S100A8
AFF3	S100A9
AFF3	SDF2
AFF3	SERPINA5
AFF3	SH3GLB2
AFF3	SLC1A4
AFF3	SLC22A5
AFF3	SLC25A37
AFF3	SLC26A11
AFF3	SLC26A3
AFF3	SLC27A4
AFF3	SLC29A3
AFF3	SLC2A1
AFF3	SLC39A6
AFF3	SLPI
AFF3	SP6
AFF3	SPATA20
AFF3	SRGAP1
AFF3	ST14
AFF3	STARD10
AFF3	STK32B
AFF3	TADA2B
AFF3	TAPT1
AFF3	TBC1D9
AFF3	TBX3
AFF3	TCEAL1
AFF3	THSD4
AFF3	TMEM101
AFF3	TMEM123
AFF3	TMEM171
AFF3	TMEM175
AFF3	TMEM229B
AFF3	TMPRSS13
AFF3	TMPRSS9
AFF3	TRAF3IP2
AFF3	TRH
AFF3	TRIM62
AFF3	TRPV6
AFF3	TTC39C
AFF3	TTC8
AFF3	UPK2
AFF3	USP35
AFF3	WDR17
AFF3	WWP1
AFF3	YRDC
AFF3	ZFYVE28
AFF3	ZNF396
AFF3	ZNF703
AFF3	ZNF853
AFF3	ZNF92
AFF4	ABHD2
AFF4	ACER2
AFF4	AFTPH
AFF4	AGGF1
AFF4	AKAP10
AFF4	ANKHD1
AFF4	ANKHD1-EIF4EBP3
AFF4	ANKRA2
AFF4	AP3B1
AFF4	AP3M1
AFF4	APC
AFF4	APPBP2
AFF4	APPL2
AFF4	AR
AFF4	ARHGEF12
AFF4	ARID4A
AFF4	ATG2B
AFF4	ATRX
AFF4	BCLAF1
AFF4	C12orf51
AFF4	C16orf72
AFF4	C5orf15
AFF4	C5orf24
AFF4	C5orf42
AFF4	C5orf51
AFF4	C6orf120
AFF4	C9orf41
AFF4	CAND1
AFF4	CANX
AFF4	CCNG1
AFF4	CCPG1
AFF4	CDK17
AFF4	CDYL2
AFF4	CEP120
AFF4	CERS6
AFF4	CGGBP1
AFF4	CHD8
AFF4	CLINT1
AFF4	CNOT6
AFF4	COL4A3BP
AFF4	CPEB4
AFF4	CREBRF
AFF4	CSNK1A1
AFF4	CSNK1A1L
AFF4	CSRNP2
AFF4	DCTN4
AFF4	DDX46
AFF4	DENND4C
AFF4	DHX29
AFF4	DIP2B
AFF4	DMXL1
AFF4	DNAJB14
AFF4	DNAJC16
AFF4	DTWD2
AFF4	ELMOD2
AFF4	EPB41L5
AFF4	ERBB2IP
AFF4	ERCC4
AFF4	ETF1
AFF4	FAF2
AFF4	FAM114A2
AFF4	FAM13B
AFF4	FAM179B
AFF4	FAM199X
AFF4	FAM63B
AFF4	FAM73A
AFF4	FARP2
AFF4	FBXL17
AFF4	FBXO38
AFF4	FBXW11
AFF4	FCHO2
AFF4	FEM1C
AFF4	FICD
AFF4	FMN1
AFF4	FNIP1
AFF4	FRS2
AFF4	GCC2
AFF4	GFM2
AFF4	GNS
AFF4	GOLGB1
AFF4	GSPT1
AFF4	GSTCD
AFF4	HECTD1
AFF4	HMGXB3
AFF4	HSPA4
AFF4	IBTK
AFF4	IL6ST
AFF4	KDM3B
AFF4	KDM6A
AFF4	KIAA0232
AFF4	KIAA0247
AFF4	KIAA0494
AFF4	KIAA1244
AFF4	KIAA1430
AFF4	KIF3A
AFF4	KIF3B
AFF4	KLHDC5
AFF4	LARP4
AFF4	LARS
AFF4	LCOR
AFF4	LMBRD2
AFF4	LMLN
AFF4	LNPEP
AFF4	LNX2
AFF4	LOC100170939
AFF4	LOC647979
AFF4	LRRFIP1
AFF4	LYSMD3
AFF4	MAML1
AFF4	MAN2A1
AFF4	MAP3K1
AFF4	MAPK9
AFF4	MARCH6
AFF4	MARVELD2
AFF4	MAT2A
AFF4	MBTPS2
AFF4	MCC
AFF4	MED13L
AFF4	MFAP3
AFF4	MICALCL
AFF4	MID2
AFF4	MIER3
AFF4	MINPP1
AFF4	MKL2
AFF4	MLH3
AFF4	MON2
AFF4	MSH3
AFF4	MTMR12
AFF4	MTX3
AFF4	MYO6
AFF4	NF1
AFF4	NPTN
AFF4	NSD1
AFF4	PANK3
AFF4	PAPD4
AFF4	PCDH1
AFF4	PCYOX1
AFF4	PDCD6IP
AFF4	PGGT1B
AFF4	PHAX
AFF4	PHC3
AFF4	PHF20
AFF4	PIK3C2A
AFF4	PJA2
AFF4	POLK
AFF4	PREPL
AFF4	PRLR
AFF4	PRRC1
AFF4	PTCD2
AFF4	PURA
AFF4	PWWP2A
AFF4	RAB21
AFF4	RAB27B
AFF4	RABEP1
AFF4	RABL3
AFF4	RAD50
AFF4	RALGAPB
AFF4	RAPGEF6
AFF4	RARS
AFF4	RASA1
AFF4	RASEF
AFF4	RBM12
AFF4	RBM27
AFF4	RGMB
AFF4	RIOK2
AFF4	RNF111
AFF4	RNF14
AFF4	RNF141
AFF4	RREB1
AFF4	RSPH3
AFF4	RUFY2
AFF4	SAP30L
AFF4	SCAF11
AFF4	SCRN3
AFF4	SEC24A
AFF4	SEC24B
AFF4	SERINC1
AFF4	SERINC3
AFF4	SETD7
AFF4	SHOC2
AFF4	SKP1
AFF4	SLC25A24
AFF4	SLC25A46
AFF4	SLC30A5
AFF4	SLC35A3
AFF4	SLC35D1
AFF4	SLC4A7
AFF4	SLK
AFF4	SLU7
AFF4	SMAD5
AFF4	SNX2
AFF4	SP1
AFF4	SPATA6
AFF4	SPOPL
AFF4	SREK1
AFF4	SRFBP1
AFF4	SRRM2
AFF4	STAM2
AFF4	STRN3
AFF4	TBC1D15
AFF4	TBC1D19
AFF4	TCP11L2
AFF4	TECTA
AFF4	TMED7
AFF4	TMEM135
AFF4	TMEM167A
AFF4	TMEM245
AFF4	TMF1
AFF4	TMTC3
AFF4	TNPO1
AFF4	TRAPPC11
AFF4	TRIM23
AFF4	TSPYL1
AFF4	TSTD2
AFF4	TTC30A
AFF4	TTC37
AFF4	UBE3A
AFF4	UBR1
AFF4	UBTD2
AFF4	UEVLD
AFF4	UHRF1BP1L
AFF4	USP47
AFF4	USP8
AFF4	UTP14C
AFF4	UTP15
AFF4	VEZF1
AFF4	VEZT
AFF4	WDR55
AFF4	WIPF2
AFF4	YIPF5
AFF4	YTHDC2
AFF4	ZBTB11
AFF4	ZFYVE20
AFF4	ZKSCAN1
AFF4	ZMYM2
AFF4	ZNF281
AFF4	ZNF484
AFF4	ZNF587
AFF4	ZNF609
AFF4	ZNF678
AFF4	ZNF800
AFF4	ZNF844
AFF4	ZSCAN29
AFF4	ZXDB
AGAP3	ACAP3
AGAP3	AGSK1
AGAP3	ANKRD13D
AGAP3	ATAD3A
AGAP3	ATAD3B
AGAP3	ATG9B
AGAP3	ATP6V0B
AGAP3	ATP6V1F
AGAP3	B3GALT6
AGAP3	B4GALT2
AGAP3	C16orf7
AGAP3	C6orf72
AGAP3	C7orf55
AGAP3	C7orf59
AGAP3	CAPN10
AGAP3	CCDC107
AGAP3	CCM2
AGAP3	CCNC
AGAP3	CDK10
AGAP3	CDK11A
AGAP3	CDK5
AGAP3	CLK3
AGAP3	CNIH
AGAP3	DGKZ
AGAP3	DVL1
AGAP3	FAM176B
AGAP3	FAM219A
AGAP3	FASTK
AGAP3	FSTL3
AGAP3	GAS8
AGAP3	GET4
AGAP3	GFOD2
AGAP3	GPSM1
AGAP3	HFE
AGAP3	HRAS
AGAP3	IMPDH1
AGAP3	KANK3
AGAP3	KIAA0895L
AGAP3	LMF2
AGAP3	LOC100288778
AGAP3	LOC143666
AGAP3	LOC202781
AGAP3	LRCH4
AGAP3	LSM5
AGAP3	MAD1L1
AGAP3	MAFK
AGAP3	MAP7D1
AGAP3	MAPK12
AGAP3	MARK4
AGAP3	MFSD12
AGAP3	MIB2
AGAP3	MIIP
AGAP3	MOB2
AGAP3	MVD
AGAP3	MVP
AGAP3	NOC2L
AGAP3	NSUN5
AGAP3	NYAP1
AGAP3	OBSL1
AGAP3	PALM
AGAP3	PDAP1
AGAP3	PLOD3
AGAP3	PMM1
AGAP3	POLR2F
AGAP3	PPP1R12C
AGAP3	PPP1R35
AGAP3	PPP1R3F
AGAP3	PQLC1
AGAP3	PRKAR1B
AGAP3	PRKRIP1
AGAP3	PUSL1
AGAP3	RHBDD2
AGAP3	RNPEPL1
AGAP3	RPS19BP1
AGAP3	RRP9
AGAP3	SAR1B
AGAP3	SELO
AGAP3	SLC4A2
AGAP3	SLMO1
AGAP3	SNX5
AGAP3	SPG7
AGAP3	SQRDL
AGAP3	THOP1
AGAP3	TIGD5
AGAP3	TMEM86B
AGAP3	TMUB1
AGAP3	TNIP2
AGAP3	TOP1MT
AGAP3	TRMT1
AGAP3	TRMT2A
AGAP3	TSC22D4
AGAP3	WBSCR22
AGAP3	XRCC4
AGAP3	ZBTB17
AGAP3	ZGPAT
AGAP3	ZMYND19
AGAP3	ZNF282
AGAP3	ZNF775
AGAP3	ZNF777
AHCTF1	ABCB10
AHCTF1	ADSS
AHCTF1	ARID4B
AHCTF1	ATP13A3
AHCTF1	B3GALNT2
AHCTF1	BPNT1
AHCTF1	C1orf112
AHCTF1	C1orf31
AHCTF1	CACYBP
AHCTF1	CAMSAP2
AHCTF1	CASP8AP2
AHCTF1	CCSAP
AHCTF1	CDC42BPA
AHCTF1	CENPF
AHCTF1	CENPL
AHCTF1	CEP170
AHCTF1	CEP170P1
AHCTF1	CEP350
AHCTF1	CHML
AHCTF1	DARS2
AHCTF1	DDX59
AHCTF1	DHX9
AHCTF1	DIEXF
AHCTF1	DNAH14
AHCTF1	DUSP12
AHCTF1	EPRS
AHCTF1	EXO1
AHCTF1	FAM208B
AHCTF1	FAM20B
AHCTF1	FAM212A
AHCTF1	FH
AHCTF1	FLVCR1
AHCTF1	HEATR1
AHCTF1	HNRNPU
AHCTF1	IARS2
AHCTF1	INTS7
AHCTF1	IPO9
AHCTF1	IRF2BP2
AHCTF1	ISG20L2
AHCTF1	IVNS1ABP
AHCTF1	LIN9
AHCTF1	MCM8
AHCTF1	MTPAP
AHCTF1	NEK2
AHCTF1	NUCKS1
AHCTF1	PIP5K1A
AHCTF1	POGK
AHCTF1	PPP1R15B
AHCTF1	PRPF3
AHCTF1	PRRC2C
AHCTF1	RAB3GAP2
AHCTF1	RBM34
AHCTF1	RRP15
AHCTF1	SDCCAG8
AHCTF1	SLC41A1
AHCTF1	SMG7
AHCTF1	SPRTN
AHCTF1	SUZ12
AHCTF1	TADA1
AHCTF1	TAF5L
AHCTF1	TARBP1
AHCTF1	TBCE
AHCTF1	TCERG1
AHCTF1	TFB2M
AHCTF1	TIMM17A
AHCTF1	TIPRL
AHCTF1	TOMM20
AHCTF1	TPR
AHCTF1	TTC13
AHCTF1	U2SURP
AHCTF1	UBAP2L
AHCTF1	UBQLN4
AHCTF1	UCHL5
AHCTF1	UPF2
AHCTF1	URB2
AHCTF1	ZNF124
AHCTF1	ZNF669
AHR	ATXN1
AHR	DPYD
AHR	ELL2
AHR	FNDC3A
AHR	FOXO1
AHR	IL6R
AHR	ITPRIPL2
AHR	KCTD12
AHR	LEPROT
AHR	LPAR1
AHR	LUZP1
AHR	MACC1
AHR	NFE2L2
AHR	OSMR
AHR	PDP1
AHR	PIK3CG
AHR	PLSCR4
AHR	RAB8B
AHR	RAG1
AHR	SLMAP
AHR	SPTLC3
AHR	SWAP70
AHR	TWISTNB
AHR	YAP1
AHR	ZEB2
AHR	ZFP36L1
AIP	ABCE1
AIP	ABHD5
AIP	ABTB1
AIP	ADRBK1
AIP	ANKRD13D
AIP	AP1M1
AIP	ARAP1
AIP	ARHGAP4
AIP	ARL2
AIP	ARL6IP4
AIP	BAD
AIP	BAX
AIP	BRF1
AIP	BRMS1
AIP	C11orf2
AIP	C20orf27
AIP	CCDC124
AIP	CCDC28B
AIP	CCDC88B
AIP	CCM2
AIP	CCS
AIP	CDK2AP2
AIP	CDKN2D
AIP	CNPY3
AIP	CNPY4
AIP	CORO1B
AIP	CTTN
AIP	DCAF15
AIP	DRAP1
AIP	EFHD2
AIP	EML3
AIP	FADD
AIP	FAM86C2P
AIP	FAU
AIP	FDX1L
AIP	FES
AIP	FIBP
AIP	FKBP2
AIP	FKBP8
AIP	GDI1
AIP	GLYCTK
AIP	IGHMBP2
AIP	KCTD17
AIP	KDM2A
AIP	LENG1
AIP	LIMD2
AIP	LOC100130987
AIP	LYL1
AIP	MACROD1
AIP	MAD1L1
AIP	MAP2K2
AIP	MAP3K11
AIP	MRPL11
AIP	MRPL21
AIP	MUS81
AIP	NADSYN1
AIP	NCAPH2
AIP	NDUFA13
AIP	NDUFB7
AIP	NDUFS8
AIP	NDUFV1
AIP	ORAOV1
AIP	PC
AIP	PELI3
AIP	PIN1
AIP	PITPNM1
AIP	PNPLA6
AIP	POLD4
AIP	PPP1CA
AIP	PPP1R12C
AIP	PTPN6
AIP	RAD9A
AIP	RALY
AIP	RASL10A
AIP	RCE1
AIP	RHOD
AIP	RNASEH2C
AIP	RPS6KB2
AIP	SART1
AIP	SCYL1
AIP	SF3B2
AIP	SIPA1
AIP	SNF8
AIP	TCIRG1
AIP	TEN1
AIP	TMED1
AIP	TMEM134
AIP	TP53I13
AIP	TRMT2A
AIP	TSR3
AIP	TSSC4
AIP	TWF2
AIP	UBXN1
AIP	UNC93B1
AIP	WDR83
AIP	ZBTB17
AIP	ZDHHC24
AIP	ZGPAT
AIRE	BPY2
AIRE	C11orf40
AIRE	CDY1
AIRE	CDY1B
AIRE	CDY2B
AIRE	CEACAM18
AIRE	CRYGA
AIRE	CSPG4P2Y
AIRE	CT47A10
AIRE	CT47A2
AIRE	CT47A9
AIRE	CXorf66
AIRE	DAZ2
AIRE	DAZ3
AIRE	DAZ4
AIRE	DEFB104A
AIRE	DEFB105A
AIRE	DEFB106A
AIRE	DEFB108B
AIRE	DEFB112
AIRE	DEFB113
AIRE	DEFB114
AIRE	DEFB116
AIRE	DEFB130
AIRE	DUX4L5
AIRE	FAM197Y2
AIRE	FAM24A
AIRE	GSX1
AIRE	HSFX1
AIRE	KRTAP13-3
AIRE	KRTAP19-2
AIRE	KRTAP19-4
AIRE	KRTAP19-6
AIRE	KRTAP19-7
AIRE	KRTAP20-1
AIRE	KRTAP20-3
AIRE	KRTAP22-1
AIRE	KRTAP23-1
AIRE	KRTAP25-1
AIRE	KRTAP6-1
AIRE	LCE3B
AIRE	LCE4A
AIRE	LINC00301
AIRE	OR1S1
AIRE	OR2T35
AIRE	OR2Y1
AIRE	OR4C16
AIRE	OR4K13
AIRE	OR52A5
AIRE	OR5AS1
AIRE	OR5L1
AIRE	OR5L2
AIRE	OR6C1
AIRE	OR6C75
AIRE	OR6P1
AIRE	OR7A17
AIRE	OR8H1
AIRE	OR8H3
AIRE	OR9G9
AIRE	PLA2G2E
AIRE	POM121L12
AIRE	PRAMEF3
AIRE	PRR20A
AIRE	PRR20B
AIRE	PRR20D
AIRE	RBMY1A1
AIRE	RBMY1A3P
AIRE	RBMY1B
AIRE	RBMY1E
AIRE	RBMY1F
AIRE	RBMY1J
AIRE	RBMY2EP
AIRE	RBMY2FP
AIRE	RBMY3AP
AIRE	RNU5E-1
AIRE	RNY4
AIRE	RNY5
AIRE	RPS4Y2
AIRE	S100A7L2
AIRE	SNAR-A3
AIRE	SNAR-A4
AIRE	SNAR-C2
AIRE	SNAR-C3
AIRE	SNAR-D
AIRE	SNAR-E
AIRE	SNAR-F
AIRE	SNAR-G2
AIRE	SNAR-H
AIRE	SNAR-I
AIRE	SNORA11C
AIRE	SNORA28
AIRE	SNORA35
AIRE	SNORA36B
AIRE	SNORA36C
AIRE	SNORA70C
AIRE	SNORD102
AIRE	SNORD103A
AIRE	SNORD104
AIRE	SNORD105
AIRE	SNORD105B
AIRE	SNORD109B
AIRE	SNORD11
AIRE	SNORD110
AIRE	SNORD111
AIRE	SNORD111B
AIRE	SNORD113-1
AIRE	SNORD113-2
AIRE	SNORD113-4
AIRE	SNORD113-5
AIRE	SNORD113-6
AIRE	SNORD113-7
AIRE	SNORD113-9
AIRE	SNORD114-1
AIRE	SNORD114-10
AIRE	SNORD114-11
AIRE	SNORD114-12
AIRE	SNORD114-13
AIRE	SNORD114-14
AIRE	SNORD114-15
AIRE	SNORD114-16
AIRE	SNORD114-17
AIRE	SNORD114-18
AIRE	SNORD114-19
AIRE	SNORD114-2
AIRE	SNORD114-20
AIRE	SNORD114-21
AIRE	SNORD114-22
AIRE	SNORD114-23
AIRE	SNORD114-24
AIRE	SNORD114-25
AIRE	SNORD114-26
AIRE	SNORD114-27
AIRE	SNORD114-28
AIRE	SNORD114-29
AIRE	SNORD114-3
AIRE	SNORD114-30
AIRE	SNORD114-31
AIRE	SNORD114-4
AIRE	SNORD114-5
AIRE	SNORD114-6
AIRE	SNORD114-7
AIRE	SNORD114-8
AIRE	SNORD114-9
AIRE	SNORD115-1
AIRE	SNORD115-10
AIRE	SNORD115-11
AIRE	SNORD115-14
AIRE	SNORD115-16
AIRE	SNORD115-17
AIRE	SNORD115-2
AIRE	SNORD115-20
AIRE	SNORD115-22
AIRE	SNORD115-24
AIRE	SNORD115-25
AIRE	SNORD115-27
AIRE	SNORD115-28
AIRE	SNORD115-3
AIRE	SNORD115-30
AIRE	SNORD115-31
AIRE	SNORD115-32
AIRE	SNORD115-33
AIRE	SNORD115-35
AIRE	SNORD115-37
AIRE	SNORD115-38
AIRE	SNORD115-39
AIRE	SNORD115-4
AIRE	SNORD115-40
AIRE	SNORD115-41
AIRE	SNORD115-44
AIRE	SNORD115-45
AIRE	SNORD115-46
AIRE	SNORD115-48
AIRE	SNORD115-5
AIRE	SNORD115-6
AIRE	SNORD115-8
AIRE	SNORD115-9
AIRE	SNORD116-1
AIRE	SNORD116-10
AIRE	SNORD116-11
AIRE	SNORD116-12
AIRE	SNORD116-13
AIRE	SNORD116-14
AIRE	SNORD116-15
AIRE	SNORD116-16
AIRE	SNORD116-18
AIRE	SNORD116-19
AIRE	SNORD116-2
AIRE	SNORD116-22
AIRE	SNORD116-23
AIRE	SNORD116-24
AIRE	SNORD116-25
AIRE	SNORD116-26
AIRE	SNORD116-27
AIRE	SNORD116-29
AIRE	SNORD116-3
AIRE	SNORD116-5
AIRE	SNORD116-8
AIRE	SNORD117
AIRE	SNORD119
AIRE	SNORD11B
AIRE	SNORD12
AIRE	SNORD121A
AIRE	SNORD121B
AIRE	SNORD123
AIRE	SNORD124
AIRE	SNORD125
AIRE	SNORD126
AIRE	SNORD127
AIRE	SNORD12B
AIRE	SNORD12C
AIRE	SNORD16
AIRE	SNORD18A
AIRE	SNORD18B
AIRE	SNORD18C
AIRE	SNORD19
AIRE	SNORD19B
AIRE	SNORD1A
AIRE	SNORD1B
AIRE	SNORD2
AIRE	SNORD20
AIRE	SNORD21
AIRE	SNORD23
AIRE	SNORD24
AIRE	SNORD25
AIRE	SNORD26
AIRE	SNORD27
AIRE	SNORD28
AIRE	SNORD29
AIRE	SNORD30
AIRE	SNORD31
AIRE	SNORD32A
[truncated: 195,247 more rows]

## Sheet: Indirect regulation (ARACNe)
MiRNA	Transcription Factor	Step II Score	Percentile Rank (%)	Num Target (All)	Num Target (WithExp)	Selected NMI	Best pFET	Adjusted pFET	Passed Cutoff
hsa-miR-150-5p	IKZF1	0.703	85.4061	270	270	0.168039	4.578e-273	1.236e-270	1
hsa-miR-135b-3p	FOXC1	0.988	47.4918	406	406	0.231185	6.755e-233	2.743e-230	1
hsa-miR-206	SOX10	0.991	45.6945	397	397	0.16763	6.526e-218	2.591e-215	1
hsa-miR-361-3p	SLA2	0.925	63.8991	213	213	0.113894	4.116e-202	8.767e-200	1
hsa-miR-1	SOX10	0.999	30.3054	397	397	0.089267	3.812e-197	1.513e-194	1
hsa-miR-802	FOXC1	1	0.000189126	406	406	0.075234	8.411e-193	3.415e-190	1
hsa-miR-452-5p	FOXC1	0.976	52.641	406	406	0.157186	1.335e-192	5.42e-190	1
hsa-miR-519a-5p	FOXC1	0.627	90.9435	406	406	0.198262	1.912e-192	7.763e-190	1
hsa-miR-143-3p	SOX10	0.994	42.9842	397	397	0.076982	2.792e-187	1.108e-184	1
hsa-miR-142-5p	ZNF831	0.988	47.4918	202	202	0.152481	1.369e-186	2.765e-184	1
hsa-miR-28-5p	FOXC1	0.997	38.6214	406	406	0.097876	3.83e-181	1.555e-178	1
hsa-miR-138-5p	FOXC1	0.991	45.6945	406	406	0.159595	6.628e-181	2.691e-178	1
hsa-miR-190b	ESR1	0.996	40.3642	267	267	0.108104	8.746e-175	2.335e-172	1
hsa-miR-34c-5p	SOX10	1	0.000189126	397	397	0.105552	1.388e-172	5.51e-170	1
hsa-miR-142-3p	ZNF831	0.885	69.392	202	202	0.140184	2.489e-171	5.028e-169	1
hsa-let-7f-5p	SOX10	0.689	87.1523	397	397	0.079479	3.747e-166	1.488e-163	1
hsa-miR-17-5p	FOXC1	0.992	44.957	406	406	0.145503	1.224e-162	4.969e-160	1
hsa-miR-34a-5p	SOX10	0.967	55.6329	397	397	0.065317	1.443e-162	5.729e-160	1
hsa-miR-299-3p	SOX10	0.867	71.9235	397	397	0.057831	3.156e-161	1.253e-158	1
hsa-miR-199a-5p	ZEB1	0.999	30.3054	385	385	0.076775	1.599e-157	6.156e-155	1
hsa-miR-1283	FOXC1	1	0.000189126	406	406	0.05568	1.894e-156	7.69e-154	1
hsa-miR-139-5p	EBF1	0.999	30.3054	232	232	0.099642	4.045e-156	9.384e-154	1
hsa-miR-873-5p	FOXC1	1	0.000189126	406	406	0.072962	1.099e-155	4.462e-153	1
hsa-miR-29a-5p	FOXC1	0.999	30.3054	406	406	0.083898	2.431e-153	9.87e-151	1
hsa-miR-628-5p	SOX10	0.999	30.3054	397	397	0.071102	5.939e-153	2.358e-150	1
hsa-miR-20a-5p	FOXC1	0.993	43.8171	406	406	0.133422	1.149e-152	4.665e-150	1
hsa-miR-409-3p	BNC2	0.899	67.7898	263	263	0.094543	4.782e-152	1.258e-149	1
hsa-miR-18b-5p	FOXC1	0.994	42.9842	406	406	0.123284	2.903e-151	1.179e-148	1
hsa-miR-197-3p	FOXC1	0.613	92.5829	406	406	0.104423	1.081e-150	4.389e-148	1
hsa-let-7c	EBF1	0.918	64.8774	232	232	0.096606	1.67e-149	3.874e-147	1
hsa-miR-145-3p	FOXC1	0.999	30.3054	406	406	0.08681	1.27e-149	5.156e-147	1
hsa-miR-10b-5p	EBF1	0.929	63.3578	232	232	0.094658	6.106e-149	1.417e-146	1
hsa-miR-134	AEBP1	0.78	79.5759	262	262	0.123697	5.467e-149	1.432e-146	1
hsa-miR-146a-3p	FOXC1	0.998	35.422	406	406	0.13521	6.036e-149	2.451e-146	1
hsa-miR-199b-5p	ZEB1	0.999	30.3054	385	385	0.068282	4.684e-148	1.803e-145	1
hsa-miR-1243	SOX10	0.548	96.5761	397	397	0.069112	4.822e-147	1.914e-144	1
hsa-miR-3674	ZEB1	0.978	52.0323	385	385	0.004034	1.024e-146	3.942e-144	1
hsa-miR-548b-5p	FOXC1	0.999	30.3054	406	406	0.085732	2.685e-146	1.09e-143	1
hsa-miR-582-5p	FOXC1	0.998	35.422	406	406	0.11833	4.694e-146	1.906e-143	1
hsa-miR-141-3p	FOXC1	0.996	40.3642	406	406	0.092168	2.166e-145	8.794e-143	1
hsa-miR-577	SOX10	0.988	47.4918	397	397	0.257445	4.838e-145	1.921e-142	1
hsa-miR-383	FOXC1	0.998	35.422	406	406	0.126581	9.975e-145	4.05e-142	1
hsa-miR-576-5p	FOXC1	0.995	41.8528	406	406	0.121079	1.613e-143	6.549e-141	1
hsa-miR-9-3p	FOXC1	0.749	82.3491	406	406	0.174821	4.022e-143	1.633e-140	1
hsa-miR-143-3p	EBF1	1	0.000189126	232	232	0.080775	1.169e-141	2.712e-139	1
hsa-miR-409-3p	NDN	1	0.000189126	282	282	0.102648	7.319e-141	2.064e-138	1
hsa-let-7g-5p	SOX10	0.721	84.1936	397	397	0.079492	1.194e-140	4.74e-138	1
hsa-miR-29a-3p	TBX21	1	0.000189126	163	163	0.10633	8.248e-139	1.344e-136	1
hsa-miR-548l	FOXC1	1	0.000189126	406	406	0.077728	4.188e-138	1.7e-135	1
hsa-miR-200a-3p	FOXC1	1	0.000189126	406	406	0.083158	5.748e-138	2.334e-135	1
hsa-miR-10b-3p	EBF1	0.957	57.9431	232	232	0.085095	1.178e-137	2.733e-135	1
hsa-miR-219-1-3p	SOX10	0.986	48.4564	397	397	0.0805	1.695e-137	6.729e-135	1
hsa-miR-337-3p	BNC2	0.956	58.1657	263	263	0.088298	6.043e-137	1.589e-134	1
hsa-miR-598	FOXC1	0.787	79.0687	406	406	0.098972	4.408e-137	1.79e-134	1
hsa-miR-221-3p	FOXC1	0.934	62.5856	406	406	0.105361	7.207e-137	2.926e-134	1
hsa-miR-500a-5p	FOXC1	0.991	45.6945	406	406	0.106331	2.618e-136	1.063e-133	1
hsa-miR-429	FOXC1	0.845	73.9144	406	406	0.096661	1.022e-134	4.149e-132	1
hsa-miR-501-5p	FOXC1	0.925	63.8991	406	406	0.099851	7.518e-134	3.052e-131	1
hsa-miR-133b	FOXC1	0.991	45.6945	406	406	0.091194	8.148e-133	3.308e-130	1
hsa-miR-337-3p	EBF1	0.87	71.6277	232	232	0.083005	2.709e-132	6.285e-130	1
hsa-miR-218-5p	EBF1	0.886	69.2789	232	232	0.080334	5.414e-131	1.256e-128	1
hsa-miR-200b-5p	FOXC1	0.997	38.6214	406	406	0.088255	5.367e-131	2.179e-128	1
hsa-miR-106a-5p	FOXC1	0.995	41.8528	406	406	0.118213	2.952e-129	1.199e-126	1
hsa-miR-483-3p	EBF1	0.703	85.4061	232	232	0.10149	6.222e-129	1.444e-126	1
hsa-miR-3170	FOXC1	1	0.000189126	406	406	0.097801	1.157e-128	4.697e-126	1
hsa-miR-204-5p	FOXC1	0.998	35.422	406	406	0.094561	1.097e-126	4.454e-124	1
hsa-miR-519a-5p	SUV39H2	0.957	57.9431	259	259	0.163235	1.771e-126	4.587e-124	1
hsa-miR-381	EBF1	0.998	35.422	232	232	0.09691	1.936e-125	4.492e-123	1
hsa-miR-200c-3p	NDN	0.991	45.6945	282	282	0.082556	1.901e-125	5.361e-123	1
hsa-miR-548a-5p	FOXC1	1	0.000189126	406	406	0.073781	1.641e-125	6.662e-123	1
hsa-miR-186-5p	FOXA1	0.999	30.3054	479	479	0.080391	1.498e-125	7.175e-123	1
hsa-miR-577	BCL11A	0.984	49.3046	197	197	0.287825	3.295e-124	6.491e-122	1
hsa-miR-106b-5p	FOXC1	0.996	40.3642	406	406	0.110551	7.28e-124	2.956e-121	1
hsa-miR-488-5p	EBF1	1	0.000189126	232	232	0.068688	1.324e-123	3.072e-121	1
hsa-miR-125b-5p	TSHZ2	0.921	64.4653	198	198	0.09635	1.871e-122	3.705e-120	1
hsa-miR-1	MEOX2	1	0.000189126	163	163	0.094842	1.417e-121	2.31e-119	1
hsa-miR-223-5p	FOXC1	0.999	30.3054	406	406	0.098086	6.552e-122	2.66e-119	1
hsa-miR-188-5p	FOXC1	0.934	62.5856	406	406	0.098714	7.049e-121	2.862e-118	1
hsa-miR-31-5p	TRIM29	0.684	87.4785	195	195	0.141681	2.136e-120	4.165e-118	1
hsa-miR-342-5p	ZMYND10	0.667	88.5229	381	381	0.076804	1.605e-120	6.115e-118	1
hsa-miR-125b-2-3p	NDN	1	0.000189126	282	282	0.091606	4.093e-120	1.154e-117	1
hsa-miR-146b-5p	SOX10	0.557	96.018	397	397	0.088089	5.766e-120	2.289e-117	1
hsa-miR-495	FOXC1	0.998	35.422	406	406	0.07273	6.541e-120	2.656e-117	1
hsa-miR-186-3p	FOXC1	1	0.000189126	406	406	0.07934	3.948e-119	1.603e-116	1
hsa-miR-3610	SOX10	0.787	79.0687	397	397	0.07198	4.533e-119	1.8e-116	1
hsa-miR-135b-5p	BCL11A	0.987	48	197	197	0.25885	2.227e-117	4.387e-115	1
hsa-miR-411-5p	EBF1	0.999	30.3054	232	232	0.077384	6.545e-117	1.518e-114	1
hsa-miR-876-3p	FOXC1	0.95	59.4113	406	406	0.067032	1.045e-116	4.243e-114	1
hsa-miR-133a	FOXC1	0.999	30.3054	406	406	0.085206	1.507e-116	6.118e-114	1
hsa-miR-381	TSHZ2	0.902	67.4195	198	198	0.103902	2.853e-115	5.649e-113	1
hsa-miR-145-5p	EBF1	0.991	45.6945	232	232	0.077787	5.945e-115	1.379e-112	1
hsa-miR-10b-3p	MEOX2	0.687	87.2815	163	163	0.090437	1.425e-114	2.323e-112	1
hsa-miR-589-3p	FOXC1	0.942	61.2867	406	406	0.09616	8.806e-115	3.575e-112	1
hsa-miR-199a-5p	ZFPM2	1	0.000189126	150	150	0.092241	2.592e-114	3.888e-112	1
hsa-miR-1	EBF1	0.538	97.2028	232	232	0.087676	2.217e-114	5.143e-112	1
hsa-miR-93-5p	FOXC1	0.996	40.3642	406	406	0.106961	1.269e-114	5.152e-112	1
hsa-miR-3613-3p	FOXC1	0.711	84.8608	406	406	0.06351	1.472e-114	5.976e-112	1
hsa-miR-135b-3p	BCL11A	0.988	47.4918	197	197	0.243695	1.441e-113	2.839e-111	1
hsa-miR-214-3p	FOXC1	0.732	83.474	406	406	0.081992	1.118e-113	4.539e-111	1
hsa-miR-202-3p	LDB2	0.981	50.9165	220	220	0.064352	2.295e-113	5.049e-111	1
hsa-miR-218-5p	TSHZ2	0.816	76.8667	198	198	0.075192	2.814e-112	5.572e-110	1
hsa-miR-299-5p	PRRX1	0.663	88.7531	240	240	0.072043	3.572e-112	8.573e-110	1
hsa-miR-3680-3p	FOXC1	1	0.000189126	406	406	0.078941	2.684e-112	1.09e-109	1
hsa-miR-452-3p	VGLL1	0.935	62.4278	151	151	0.184885	8.496e-112	1.283e-109	1
hsa-miR-744-3p	FOXC1	0.999	30.3054	406	406	0.084796	1.86e-111	7.552e-109	1
hsa-miR-374a-5p	FOXC1	0.919	64.7361	406	406	0.079471	2.048e-111	8.315e-109	1
hsa-miR-758	EBF1	0.986	48.4564	232	232	0.070925	5.069e-111	1.176e-108	1
hsa-miR-655	FOXC1	0.694	86.0338	406	406	0.067217	1.449e-110	5.883e-108	1
hsa-miR-3620	FOXC1	0.931	63.0711	406	406	0.092778	1.726e-110	7.008e-108	1
hsa-miR-542-3p	EBF1	0.983	50.1019	232	232	0.07417	5.386e-110	1.25e-107	1
hsa-miR-378b	FOXC1	0.967	55.6329	406	406	0.099674	3.606e-110	1.464e-107	1
hsa-miR-409-3p	ZEB1	1	0.000189126	385	385	0.073773	5.712e-110	2.199e-107	1
hsa-miR-3126-3p	FOXC1	0.631	90.7041	406	406	0.061995	7.363e-110	2.989e-107	1
hsa-miR-1237	FOXC1	0.731	83.5317	406	406	0.079854	9.353e-109	3.797e-106	1
hsa-miR-29b-3p	TBX21	1	0.000189126	163	163	0.084654	2.62e-108	4.271e-106	1
hsa-miR-505-5p	BCL11A	0.893	68.509	197	197	0.121702	5.118e-108	1.008e-105	1
hsa-miR-17-3p	BCL11A	0.885	69.392	197	197	0.15499	8.053e-108	1.586e-105	1
hsa-miR-452-3p	BCL11A	0.992	44.957	197	197	0.166567	1.284e-107	2.529e-105	1
hsa-miR-211-5p	FOXC1	1	0.000189126	406	406	0.052698	7.004e-108	2.844e-105	1
hsa-miR-889	FOXC1	1	0.000189126	406	406	0.068772	8.856e-108	3.596e-105	1
hsa-miR-922	PRRX1	0.967	55.6329	240	240	0.014224	2.34e-107	5.616e-105	1
hsa-miR-505-3p	BCL11A	0.957	57.9431	197	197	0.143317	6.917e-107	1.363e-104	1
hsa-miR-96-3p	SOX10	0.678	87.829	397	397	0.08046	4.67e-107	1.854e-104	1
hsa-miR-450b-5p	FOXC1	1	0.000189126	406	406	0.075112	7.947e-107	3.226e-104	1
hsa-miR-18a-5p	BCL11A	0.908	66.6779	197	197	0.18702	2.614e-106	5.15e-104	1
hsa-miR-152	ZFPM2	0.975	52.9929	150	150	0.092419	2.168e-104	3.252e-102	1
hsa-miR-3653	FOXC1	1	0.000189126	406	406	0.073802	1.351e-104	5.485e-102	1
hsa-miR-125b-5p	PLAGL1	1	0.000189126	234	234	0.086391	3.837e-104	8.979e-102	1
hsa-miR-410	PRRX1	0.987	48	240	240	0.084496	4.294e-104	1.031e-101	1
hsa-miR-381	BNC2	0.589	94.0779	263	263	0.07917	4.889e-104	1.286e-101	1
hsa-miR-1301	FOXC1	0.861	72.4825	406	406	0.098008	4.375e-104	1.776e-101	1
hsa-miR-452-5p	BCL11A	0.997	38.6214	197	197	0.161659	1.846e-103	3.637e-101	1
hsa-miR-16-5p	FOXC1	1	0.000189126	406	406	0.083979	1.017e-103	4.129e-101	1
hsa-miR-195-5p	MEOX2	1	0.000189126	163	163	0.082549	7.043e-103	1.148e-100	1
hsa-miR-138-5p	BCL11A	0.993	43.8171	197	197	0.165893	7.92e-103	1.56e-100	1
hsa-miR-541-3p	EBF1	0.625	91.07	232	232	0.066035	1.26e-102	2.923e-100	1
hsa-miR-519a-5p	BCL11A	0.99	46.3194	197	197	0.203496	1.813e-102	3.572e-100	1
hsa-miR-28-3p	VGLL1	0.545	96.7652	151	151	0.132511	2.441e-102	3.686e-100	1
hsa-miR-146a-5p	TFEC	0.721	84.1936	240	240	0.124152	2.319e-102	5.566e-100	1
hsa-miR-18b-5p	BCL11A	0.761	81.5593	197	197	0.134755	4.049e-102	7.977e-100	1
hsa-miR-573	FOXC1	0.996	40.3642	406	406	0.062857	2.553e-102	1.037e-99	1
hsa-miR-590-3p	SOX10	1	0.000189126	397	397	0.095825	2.677e-102	1.063e-99	1
hsa-miR-485-5p	MEOX1	0.898	67.9157	257	257	0.064569	4.938e-102	1.269e-99	1
hsa-miR-196b-3p	FOXC1	1	0.000189126	406	406	0.066091	5.595e-102	2.272e-99	1
hsa-miR-424-5p	FOXC1	0.927	63.6439	406	406	0.085696	6.153e-102	2.498e-99	1
hsa-miR-187-3p	VGLL1	0.518	98.8944	151	151	0.150125	1.785e-101	2.695e-99	1
hsa-miR-381	LDB2	1	0.000189126	220	220	0.093322	1.53e-100	3.366e-98	1
hsa-miR-3136-5p	FOXC1	0.999	30.3054	406	406	0.071735	3.273e-100	1.329e-97	1
hsa-miR-186-5p	BCL11A	0.893	68.509	197	197	0.099481	1.492e-99	2.939e-97	1
hsa-miR-541-3p	PRRX1	1	0.000189126	240	240	0.063877	1.262e-99	3.029e-97	1
hsa-miR-19b-1-5p	BCL11A	0.998	35.422	197	197	0.127802	1.597e-99	3.146e-97	1
hsa-miR-155-5p	SPI1	1	0.000189126	281	281	0.10553	3.146e-99	8.84e-97	1
hsa-miR-150-5p	IRF8	0.947	60.0144	126	126	0.138317	8.221e-99	1.036e-96	1
hsa-miR-381	MEOX2	0.972	53.8807	163	163	0.09842	6.38e-99	1.04e-96	1
hsa-miR-199b-5p	ZFPM2	0.933	62.756	150	150	0.091971	8.395e-99	1.259e-96	1
hsa-miR-410	TSHZ2	0.802	77.9487	198	198	0.091801	1.026e-98	2.031e-96	1
hsa-miR-495	EBF1	0.999	30.3054	232	232	0.073181	2.741e-98	6.359e-96	1
hsa-miR-206	BCL11A	0.986	48.4564	197	197	0.182373	4.408e-98	8.684e-96	1
hsa-miR-944	TSHZ2	0.681	87.6495	198	198	0.081769	5.425e-98	1.074e-95	1
hsa-miR-495	NDN	1	0.000189126	282	282	0.078826	3.821e-98	1.078e-95	1
hsa-miR-590-5p	BCL11A	0.998	35.422	197	197	0.121407	7.02e-98	1.383e-95	1
hsa-miR-224-5p	BCL11A	0.992	44.957	197	197	0.183035	8.641e-98	1.702e-95	1
hsa-miR-20a-3p	BCL11A	0.993	43.8171	197	197	0.123894	2.815e-97	5.546e-95	1
hsa-miR-17-5p	FOXA1	0.998	35.422	479	479	0.097429	1.281e-97	6.136e-95	1
hsa-miR-542-3p	TSHZ2	0.929	63.3578	198	198	0.080973	3.43e-97	6.791e-95	1
hsa-miR-1248	FOXC1	0.941	61.4501	406	406	0.099885	2.754e-97	1.118e-94	1
hsa-miR-3606	ZEB1	1	0.000189126	385	385	0.052707	4.294e-97	1.653e-94	1
hsa-miR-374a-3p	ZNF831	0.999	30.3054	202	202	0.079955	1.529e-96	3.089e-94	1
hsa-miR-802	FOXA1	1	0.000189126	479	479	0.05249	1.007e-96	4.824e-94	1
hsa-miR-377-5p	EBF1	0.704	85.3321	232	232	0.069492	2.194e-96	5.09e-94	1
hsa-miR-758	ZFPM2	0.996	40.3642	150	150	0.081789	3.551e-96	5.326e-94	1
hsa-miR-590-3p	FOXA1	0.88	69.9515	479	479	0.085042	1.496e-96	7.166e-94	1
hsa-miR-876-5p	BCL11A	0.77	80.312	197	197	0.077495	7.909e-95	1.558e-92	1
hsa-miR-374b-3p	FOXC1	0.993	43.8171	406	406	0.069976	4.01e-95	1.628e-92	1
hsa-miR-767-5p	VGLL1	0.824	76.2581	151	151	0.221205	5.721e-94	8.639e-92	1
hsa-miR-3614-5p	STAT1	0.977	52.3486	109	109	0.16529	9.578e-94	1.044e-91	1
hsa-miR-30e-3p	TBX21	0.999	30.3054	163	163	0.085241	6.953e-94	1.133e-91	1
hsa-miR-3682-3p	BCL11A	0.995	41.8528	197	197	0.094594	8.371e-94	1.649e-91	1
hsa-miR-577	SLA2	0.582	94.5025	213	213	0.191359	8.461e-94	1.802e-91	1
hsa-miR-31-5p	BCL11A	0.985	48.8707	197	197	0.145945	9.213e-94	1.815e-91	1
hsa-miR-93-5p	EZH2	0.92	64.6001	100	100	0.125055	2.317e-93	2.317e-91	1
hsa-miR-3622a-3p	BCL11A	0.672	88.2169	197	197	0.120872	2.656e-93	5.232e-91	1
hsa-miR-202-5p	EBF1	1	0.000189126	232	232	0.068494	3.836e-93	8.9e-91	1
hsa-miR-607	SOX10	0.999	30.3054	397	397	0.055524	2.702e-93	1.073e-90	1
hsa-miR-200a-5p	FOXC1	0.609	92.8234	406	406	0.074222	3.175e-93	1.289e-90	1
hsa-miR-1292	FOXC1	1	0.000189126	406	406	0.065496	3.202e-93	1.3e-90	1
hsa-miR-30e-5p	BCL11A	0.996	40.3642	197	197	0.088511	1.621e-92	3.193e-90	1
hsa-miR-1254	FOXC1	1	0.000189126	406	406	0.077909	9.265e-93	3.762e-90	1
hsa-miR-493-5p	ZFPM2	1	0.000189126	150	150	0.076838	3.301e-92	4.952e-90	1
hsa-miR-361-3p	FOXC1	0.591	93.9535	406	406	0.068168	1.542e-92	6.261e-90	1
hsa-miR-548s	SUV39H2	1	0.000189126	259	259	0.085344	2.874e-92	7.444e-90	1
hsa-miR-3926	TSHZ2	0.999	30.3054	198	198	0.065747	5.983e-92	1.185e-89	1
hsa-miR-330-3p	FOXC1	1	0.000189126	406	406	0.069171	4.721e-92	1.917e-89	1
hsa-miR-204-5p	OSR1	0.999	30.3054	113	113	0.145695	1.806e-91	2.041e-89	1
hsa-miR-106a-3p	FOXC1	1	0.000189126	406	406	0.089134	7.749e-92	3.146e-89	1
hsa-miR-409-3p	TSHZ3	0.998	35.422	190	190	0.088727	4.887e-91	9.285e-89	1
hsa-miR-410	ERG	1	0.000189126	171	171	0.087075	6.64e-91	1.135e-88	1
hsa-miR-577	DEK	0.989	46.9549	190	190	0.194907	8.449e-91	1.605e-88	1
hsa-let-7d-5p	BCL11A	0.921	64.4653	197	197	0.087584	1.847e-90	3.639e-88	1
hsa-miR-519b-3p	BCL11A	0.999	30.3054	197	197	0.059831	2.206e-90	4.346e-88	1
hsa-miR-31-3p	BCL11A	0.901	67.5479	197	197	0.116882	2.984e-90	5.878e-88	1
hsa-miR-497-3p	FOXC1	0.783	79.3507	406	406	0.063159	1.855e-90	7.531e-88	1
hsa-miR-20a-5p	FOXA1	0.998	35.422	479	479	0.093903	1.715e-90	8.215e-88	1
hsa-miR-146a-5p	BCL11A	0.993	43.8171	197	197	0.1209	4.329e-90	8.528e-88	1
hsa-miR-570-3p	SUV39H2	0.593	93.8313	259	259	0.088664	4.286e-90	1.11e-87	1
hsa-miR-10a-5p	EBF1	0.877	70.3655	232	232	0.10733	6.285e-90	1.458e-87	1
hsa-miR-1304-5p	BCL11A	0.693	86.1096	197	197	0.104876	8.09e-90	1.594e-87	1
hsa-miR-556-3p	FOXC1	1	0.000189126	406	406	0.078078	6.272e-90	2.546e-87	1
hsa-miR-590-3p	BCL11A	0.999	30.3054	197	197	0.110096	1.329e-89	2.618e-87	1
hsa-miR-9-3p	BCL11A	0.993	43.8171	197	197	0.193751	1.835e-89	3.615e-87	1
hsa-miR-92a-3p	BCL11A	0.997	38.6214	197	197	0.101758	1.851e-89	3.646e-87	1
hsa-miR-3926	ZEB1	1	0.000189126	385	385	0.054129	1.466e-89	5.644e-87	1
hsa-miR-889	BNC2	0.671	88.277	263	263	0.07426	2.839e-89	7.467e-87	1
hsa-miR-582-3p	BCL11A	1	0.000189126	197	197	0.12262	4.309e-89	8.489e-87	1
hsa-miR-616-5p	FOXC1	1	0.000189126	406	406	0.066877	2.569e-89	1.043e-86	1
hsa-miR-521	BCL11A	0.867	71.9235	197	197	0.073513	7.06e-89	1.391e-86	1
hsa-miR-224-3p	BCL11A	0.989	46.9549	197	197	0.139378	1.045e-88	2.059e-86	1
hsa-miR-106b-5p	FOXA1	1	0.000189126	479	479	0.089244	4.76e-89	2.28e-86	1
hsa-miR-200b-3p	NDN	0.96	57.3267	282	282	0.074613	1.031e-88	2.907e-86	1
hsa-miR-421	FOXC1	1	0.000189126	406	406	0.080547	8.148e-89	3.308e-86	1
hsa-miR-9-5p	BCL11A	0.985	48.8707	197	197	0.196726	2.735e-88	5.388e-86	1
hsa-miR-548b-3p	BCL11A	0.997	38.6214	197	197	0.109993	3.625e-88	7.141e-86	1
hsa-miR-3129-5p	EBF1	1	0.000189126	232	232	0.077635	6.762e-88	1.569e-85	1
hsa-miR-548d-3p	BCL11A	0.998	35.422	197	197	0.12121	1.202e-87	2.368e-85	1
hsa-miR-1915-5p	BCL11A	1	0.000189126	197	197	0.073872	1.539e-87	3.032e-85	1
hsa-miR-146a-3p	BCL11A	0.949	59.6114	197	197	0.137687	1.578e-87	3.109e-85	1
hsa-miR-561-3p	FOXC1	1	0.000189126	406	406	0.055185	1.632e-87	6.626e-85	1
hsa-miR-150-3p	ZBED2	0.817	76.801	83	83	0.18411	8.418e-87	6.987e-85	1
hsa-miR-662	BCL11A	0.509	99.4411	197	197	0.060773	3.865e-87	7.614e-85	1
hsa-miR-127-5p	ZFPM2	0.616	91.6892	150	150	0.077972	5.262e-87	7.893e-85	1
hsa-miR-411-5p	LDB2	1	0.000189126	220	220	0.072112	4.868e-87	1.071e-84	1
hsa-miR-130a-5p	BCL11A	1	0.000189126	197	197	0.106406	6.021e-87	1.186e-84	1
hsa-miR-140-5p	BCL11A	0.961	57.1053	197	197	0.126689	7.099e-87	1.399e-84	1
hsa-miR-548l	BCL11A	1	0.000189126	197	197	0.070455	7.519e-87	1.481e-84	1
hsa-miR-28-3p	BCL11A	1	0.000189126	197	197	0.109552	8.82e-87	1.738e-84	1
hsa-miR-493-5p	ZEB1	1	0.000189126	385	385	0.069181	9.282e-87	3.574e-84	1
hsa-miR-500a-5p	BCL11A	0.99	46.3194	197	197	0.098453	2.587e-86	5.096e-84	1
hsa-miR-3674	ZEB2	0.985	48.8707	312	312	0.002951	1.781e-86	5.557e-84	1
hsa-miR-141-3p	ZEB1	0.999	30.3054	385	385	0.082376	2.46e-86	9.471e-84	1
hsa-miR-3115	SOX10	0.977	52.3486	397	397	0.069942	2.758e-86	1.095e-83	1
hsa-miR-135b-5p	PLAGL1	0.989	46.9549	234	234	0.177688	6.716e-86	1.572e-83	1
hsa-miR-130b-5p	BCL11A	0.984	49.3046	197	197	0.104512	9.827e-86	1.936e-83	1
hsa-miR-29a-5p	BCL11A	0.995	41.8528	197	197	0.079311	1.419e-85	2.795e-83	1
hsa-miR-892a	PPARG	0.996	40.3642	126	126	0.064555	2.408e-85	3.034e-83	1
hsa-miR-92a-1-5p	BCL11A	1	0.000189126	197	197	0.100197	1.826e-85	3.597e-83	1
hsa-miR-23a-3p	FOXA1	1	0.000189126	479	479	0.067188	1.166e-85	5.585e-83	1
hsa-miR-577	PLAGL1	0.993	43.8171	234	234	0.195711	2.654e-85	6.21e-83	1
hsa-miR-199b-3p	ZEB1	1	0.000189126	385	385	0.064628	3.631e-85	1.398e-82	1
hsa-miR-199a-3p	ZEB1	1	0.000189126	385	385	0.064604	4.123e-85	1.587e-82	1
hsa-miR-708-3p	NKX3-2	0.96	57.3267	70	70	0.13059	2.36e-84	1.652e-82	1
hsa-miR-3926	BNC2	0.624	91.1302	263	263	0.060409	8.859e-85	2.33e-82	1
hsa-miR-30e-3p	BCL11A	0.998	35.422	197	197	0.112878	1.282e-84	2.526e-82	1
hsa-miR-500b	BCL11A	1	0.000189126	197	197	0.100576	1.523e-84	3e-82	1
hsa-miR-432-5p	TSHZ3	0.981	50.9165	190	190	0.094088	1.939e-84	3.684e-82	1
hsa-miR-299-5p	EBF1	1	0.000189126	232	232	0.067657	2.258e-84	5.239e-82	1
hsa-miR-337-3p	TSHZ3	0.988	47.4918	190	190	0.089003	3.222e-84	6.122e-82	1
hsa-miR-514a-3p	FOXC1	0.787	79.0687	406	406	0.09843	9.69e-84	3.934e-81	1
hsa-miR-24-3p	BCL11A	0.671	88.277	197	197	0.089941	2.836e-83	5.587e-81	1
hsa-miR-190b	BCL11A	0.994	42.9842	197	197	0.102723	5.844e-83	1.151e-80	1
hsa-miR-134	ZFPM2	0.998	35.422	150	150	0.101327	8.364e-83	1.255e-80	1
hsa-let-7g-3p	BCL11A	0.998	35.422	197	197	0.073511	9.358e-83	1.844e-80	1
hsa-miR-522-3p	BCL11A	0.999	30.3054	197	197	0.063572	1.518e-82	2.99e-80	1
hsa-miR-3678-3p	SOX10	0.993	43.8171	397	397	0.055885	1.209e-82	4.8e-80	1
hsa-miR-25-3p	EZH2	1	0.000189126	100	100	0.113416	5.937e-82	5.937e-80	1
hsa-miR-125a-3p	FOXC1	0.974	53.3216	406	406	0.074076	1.563e-82	6.346e-80	1
hsa-miR-150-3p	MEOX2	1	0.000189126	163	163	0.092764	4.365e-82	7.115e-80	1
hsa-miR-655	EBF1	1	0.000189126	232	232	0.065467	5.886e-82	1.366e-79	1
hsa-miR-488-3p	TSHZ2	0.938	61.9367	198	198	0.092728	7.279e-82	1.441e-79	1
hsa-miR-1185-5p	FOXC1	1	0.000189126	406	406	0.05589	3.828e-82	1.554e-79	1
hsa-miR-125b-2-3p	OSR1	0.788	78.9981	113	113	0.115878	1.746e-81	1.973e-79	1
hsa-miR-193b-5p	FOXC1	0.749	82.3491	406	406	0.066004	7.626e-82	3.096e-79	1
hsa-miR-202-5p	TSHZ2	0.994	42.9842	198	198	0.066986	1.642e-81	3.251e-79	1
hsa-miR-323a-3p	BNC2	0.681	87.6495	263	263	0.0791	1.24e-81	3.261e-79	1
hsa-miR-487b	LDB2	1	0.000189126	220	220	0.070521	2.123e-81	4.671e-79	1
hsa-miR-3116	BCL11A	0.945	60.3862	197	197	0.071017	3.806e-81	7.498e-79	1
hsa-miR-424-5p	ZNF831	1	0.000189126	202	202	0.083656	4.197e-81	8.478e-79	1
hsa-miR-493-5p	EBF1	0.933	62.756	232	232	0.065048	4.757e-81	1.104e-78	1
hsa-miR-518b	BCL11A	1	0.000189126	197	197	0.129752	7.616e-81	1.5e-78	1
hsa-miR-588	SUV39H2	1	0.000189126	259	259	0.048857	1.406e-80	3.642e-78	1
hsa-miR-23a-3p	BCL11A	1	0.000189126	197	197	0.087322	2.19e-80	4.314e-78	1
hsa-let-7i-3p	BCL11A	0.918	64.8774	197	197	0.08721	3.872e-80	7.628e-78	1
hsa-miR-495	TSHZ2	0.747	82.4777	198	198	0.079154	4.12e-80	8.158e-78	1
hsa-miR-374b-5p	FOXC1	0.911	66.3066	406	406	0.078669	2.028e-80	8.234e-78	1
hsa-miR-877-3p	BCL11A	1	0.000189126	197	197	0.116212	6.786e-80	1.337e-77	1
hsa-miR-511	VGLL1	0.966	55.8939	151	151	0.138982	1.406e-79	2.123e-77	1
hsa-miR-2116-3p	BCL11A	1	0.000189126	197	197	0.081935	1.129e-79	2.224e-77	1
hsa-miR-943	FOXC1	0.602	93.2556	406	406	0.069517	1.495e-79	6.07e-77	1
hsa-miR-485-3p	ZFPM2	1	0.000189126	150	150	0.070706	4.599e-79	6.898e-77	1
hsa-miR-382-5p	LDB2	0.707	85.1356	220	220	0.069865	3.395e-79	7.469e-77	1
hsa-miR-616-5p	SUV39H2	0.948	59.7998	259	259	0.074101	9.886e-79	2.56e-76	1
hsa-let-7c	BACH2	0.8	78.0958	142	142	0.085234	3.744e-78	5.316e-76	1
hsa-miR-224-3p	IKZF1	0.832	75.08	270	270	0.102913	2.479e-78	6.693e-76	1
hsa-miR-3675-5p	EBF1	0.826	76.103	232	232	0.030377	3.692e-78	8.565e-76	1
hsa-miR-30e-5p	FOXA1	0.98	51.2666	479	479	0.069441	2.15e-78	1.03e-75	1
hsa-miR-107	FOXC1	0.893	68.509	406	406	0.063093	2.806e-78	1.139e-75	1
hsa-miR-2276	FOXC1	0.808	77.4849	406	406	0.080889	3.432e-78	1.393e-75	1
hsa-miR-889	TSHZ2	0.92	64.6001	198	198	0.075502	1.577e-77	3.122e-75	1
hsa-miR-584-5p	WWTR1	0.785	79.2213	226	226	0.123276	2.393e-77	5.408e-75	1
hsa-miR-146b-5p	BCL11A	1	0.000189126	197	197	0.091165	2.904e-77	5.721e-75	1
hsa-miR-570-3p	BCL11A	1	0.000189126	197	197	0.09926	2.989e-77	5.888e-75	1
hsa-miR-409-3p	TSHZ2	0.905	67.048	198	198	0.07556	4.134e-77	8.185e-75	1
hsa-miR-3938	BCL11A	1	0.000189126	197	197	0.050826	6.653e-77	1.311e-74	1
hsa-miR-548f	BCL11A	0.998	35.422	197	197	0.081922	8.055e-77	1.587e-74	1
hsa-miR-32-3p	FOXC1	1	0.000189126	406	406	0.074504	4.546e-77	1.846e-74	1
hsa-miR-431-5p	VGLL1	0.91	66.4231	151	151	0.111366	1.967e-76	2.97e-74	1
hsa-miR-654-3p	ZEB1	0.825	76.1828	385	385	0.058802	9.098e-77	3.503e-74	1
hsa-let-7c	BNC2	0.773	80.0996	263	263	0.069309	1.665e-76	4.379e-74	1
hsa-miR-136-5p	BNC2	0.808	77.4849	263	263	0.075048	2.947e-76	7.751e-74	1
hsa-miR-494	EBF1	0.998	35.422	232	232	0.067382	3.758e-76	8.719e-74	1
hsa-miR-154-5p	TSHZ2	0.606	93.0042	198	198	0.064824	6.106e-76	1.209e-73	1
hsa-miR-3065-5p	FOXC1	1	0.000189126	406	406	0.103956	3.064e-76	1.244e-73	1
hsa-miR-539-5p	FOXC1	0.909	66.5461	406	406	0.06381	4.237e-76	1.72e-73	1
hsa-miR-411-3p	ZNF831	1	0.000189126	202	202	0.066269	1.106e-75	2.234e-73	1
hsa-miR-103a-3p	FOXC1	0.988	47.4918	406	406	0.06233	1.249e-75	5.071e-73	1
hsa-miR-20b-5p	FOXC1	1	0.000189126	406	406	0.101342	1.437e-75	5.834e-73	1
hsa-miR-433	EBF1	1	0.000189126	232	232	0.061238	2.776e-75	6.44e-73	1
hsa-miR-519a-3p	BCL11A	0.999	30.3054	197	197	0.05591	4.014e-75	7.908e-73	1
hsa-miR-142-3p	CIITA	0.994	42.9842	99	99	0.146207	1.099e-74	1.088e-72	1
hsa-miR-342-3p	GATA3	0.999	30.3054	342	342	0.076349	3.315e-75	1.134e-72	1
hsa-miR-155-5p	BCL11A	0.997	38.6214	197	197	0.098184	6.307e-75	1.242e-72	1
hsa-miR-374a-3p	BCL11A	0.952	59.0083	197	197	0.075821	9.717e-75	1.914e-72	1
hsa-miR-374c-5p	FOXC1	0.729	83.6695	406	406	0.087958	5.931e-75	2.408e-72	1
hsa-miR-1227	BCL11A	0.907	66.7968	197	197	0.099195	1.477e-74	2.91e-72	1
hsa-miR-519c-3p	FOXN2	1	0.000189126	309	309	0.046763	1.251e-74	3.866e-72	1
hsa-miR-1271-5p	BCL11A	1	0.000189126	197	197	0.076681	1.971e-74	3.883e-72	1
hsa-miR-155-3p	BCL11A	1	0.000189126	197	197	0.105698	2.031e-74	4.001e-72	1
hsa-miR-32-5p	IKZF1	0.826	76.103	270	270	0.077196	1.707e-74	4.609e-72	1
hsa-miR-181c-3p	BCL11A	1	0.000189126	197	197	0.102495	2.56e-74	5.043e-72	1
hsa-miR-127-5p	TSHZ3	0.54	97.0708	190	190	0.076641	3.506e-74	6.661e-72	1
hsa-miR-599	ZEB2	0.869	71.7164	312	312	0.008098	2.418e-74	7.544e-72	1
hsa-miR-505-3p	YBX1	0.951	59.2129	204	204	0.118354	3.93e-74	8.017e-72	1
hsa-miR-676-5p	FOXC1	1	0.000189126	406	406	0.075213	3.841e-74	1.559e-71	1
hsa-miR-767-5p	BCL11A	0.852	73.306	197	197	0.216673	1.352e-73	2.663e-71	1
hsa-miR-656	PRRX1	1	0.000189126	240	240	0.055134	1.161e-73	2.786e-71	1
hsa-miR-3202	SCML4	0.863	72.3025	91	91	0.073532	3.241e-73	2.949e-71	1
hsa-miR-1248	BCL11A	0.676	87.9604	197	197	0.107205	1.65e-73	3.25e-71	1
hsa-miR-655	TSHZ2	0.999	30.3054	198	198	0.067597	1.717e-73	3.4e-71	1
hsa-miR-202-3p	OSR1	0.744	82.6795	113	113	0.072968	3.053e-73	3.45e-71	1
hsa-miR-409-3p	GLIS1	1	0.000189126	72	72	0.133069	5.779e-73	4.161e-71	1
hsa-miR-1262	EBF1	1	0.000189126	232	232	0.058588	1.852e-73	4.297e-71	1
hsa-miR-206	MEOX2	1	0.000189126	163	163	0.144102	2.691e-73	4.386e-71	1
hsa-miR-137	BCL11A	1	0.000189126	197	197	0.119493	3.363e-73	6.625e-71	1
hsa-miR-129-5p	BCL11A	1	0.000189126	197	197	0.123822	4.675e-73	9.21e-71	1
hsa-miR-17-5p	EZH2	0.914	65.901	100	100	0.141079	2.121e-72	2.121e-70	1
hsa-miR-518a-5p	BCL11A	0.767	81.0766	197	197	0.05081	1.259e-72	2.48e-70	1
hsa-miR-133a	LDB2	0.672	88.2169	220	220	0.08867	1.344e-72	2.957e-70	1
hsa-miR-2116-5p	BCL11A	1	0.000189126	197	197	0.087375	1.629e-72	3.209e-70	1
hsa-miR-29b-2-5p	BCL11A	0.999	30.3054	197	197	0.080366	1.844e-72	3.633e-70	1
hsa-miR-199b-3p	EBF1	0.572	95.1007	232	232	0.065502	1.856e-72	4.306e-70	1
hsa-miR-199a-3p	EBF1	0.572	95.1007	232	232	0.065476	1.914e-72	4.44e-70	1
hsa-miR-548j	FOXC1	1	0.000189126	406	406	0.06112	1.231e-72	4.998e-70	1
hsa-miR-3607-3p	FOXC1	1	0.000189126	406	406	0.068038	1.614e-72	6.553e-70	1
hsa-miR-559	FOXC1	1	0.000189126	406	406	0.041856	1.954e-72	7.933e-70	1
hsa-miR-3616-5p	BCL11A	1	0.000189126	197	197	0.062828	4.128e-72	8.132e-70	1
hsa-miR-526b-5p	BCL11A	0.591	93.9535	197	197	0.116526	4.198e-72	8.27e-70	1
hsa-miR-411-3p	BNC2	0.999	30.3054	263	263	0.068196	3.293e-72	8.661e-70	1
hsa-miR-3155a	BCL11A	1	0.000189126	197	197	0.06649	4.906e-72	9.665e-70	1
hsa-miR-1276	BCL11A	0.936	62.2593	197	197	0.100554	7.051e-72	1.389e-69	1
hsa-miR-3664-5p	BCL11A	1	0.000189126	197	197	0.100501	1.092e-71	2.151e-69	1
hsa-miR-579	BCL11A	0.852	73.306	197	197	0.072151	1.402e-71	2.762e-69	1
hsa-miR-429	ZEB1	1	0.000189126	385	385	0.080831	7.418e-72	2.856e-69	1
hsa-miR-23c	FOXC1	0.748	82.417	406	406	0.069677	8.494e-72	3.449e-69	1
hsa-miR-502-5p	BCL11A	1	0.000189126	197	197	0.097037	1.859e-71	3.662e-69	1
hsa-miR-195-5p	OSR1	0.993	43.8171	113	113	0.083404	4.59e-71	5.187e-69	1
hsa-miR-548a-3p	ZEB2	0.92	64.6001	312	312	0.016266	1.754e-71	5.472e-69	1
hsa-miR-1266	FOXC1	0.743	82.7428	406	406	0.081158	1.506e-71	6.114e-69	1
hsa-miR-362-5p	BCL11A	0.991	45.6945	197	197	0.116731	3.341e-71	6.582e-69	1
hsa-miR-141-3p	EBF1	0.787	79.0687	232	232	0.088006	3.381e-71	7.844e-69	1
hsa-miR-142-3p	POU2F2	0.728	83.7268	65	65	0.182127	1.326e-70	8.619e-69	1
hsa-miR-452-3p	YEATS2	0.901	67.5479	330	330	0.128565	3.131e-71	1.033e-68	1
hsa-miR-130b-5p	DEK	0.793	78.6267	190	190	0.087884	5.583e-71	1.061e-68	1
hsa-miR-25-3p	BCL11A	1	0.000189126	197	197	0.087671	7.388e-71	1.455e-68	1
hsa-miR-589-3p	BCL11A	1	0.000189126	197	197	0.105382	8.461e-71	1.667e-68	1
hsa-miR-381	ETS1	0.994	42.9842	147	147	0.08348	1.557e-70	2.289e-68	1
hsa-miR-106b-5p	EZH2	0.941	61.4501	100	100	0.124442	2.702e-70	2.702e-68	1
hsa-miR-380-5p	TSHZ2	1	0.000189126	198	198	0.05629	1.437e-70	2.845e-68	1
hsa-miR-150-3p	ZEB2	0.813	77.1076	312	312	0.082523	9.283e-71	2.896e-68	1
hsa-miR-3913-5p	FOXC1	1	0.000189126	406	406	0.061494	7.567e-71	3.072e-68	1
hsa-miR-409-3p	PITX2	1	0.000189126	44	44	0.148039	7.695e-70	3.386e-68	1
hsa-miR-3199	BCL11A	1	0.000189126	197	197	0.079833	1.832e-70	3.609e-68	1
hsa-miR-29c-3p	BCL11A	1	0.000189126	197	197	0.091267	2.691e-70	5.301e-68	1
hsa-miR-33a-5p	BCL11A	1	0.000189126	197	197	0.102562	3.342e-70	6.584e-68	1
hsa-miR-18a-5p	YBX1	0.945	60.3862	204	204	0.152123	3.694e-70	7.536e-68	1
hsa-miR-299-5p	TSHZ2	0.706	85.2045	198	198	0.064814	3.944e-70	7.809e-68	1
hsa-miR-597	BCL11A	0.941	61.4501	197	197	0.073236	4.053e-70	7.984e-68	1
hsa-miR-876-3p	BCL11A	1	0.000189126	197	197	0.060297	4.243e-70	8.359e-68	1
hsa-miR-152	RUNX2	1	0.000189126	81	81	0.106853	1.666e-69	1.349e-67	1
hsa-miR-136-5p	PLAGL1	0.79	78.8491	234	234	0.069247	6.678e-70	1.563e-67	1
hsa-miR-142-5p	BCL11A	1	0.000189126	197	197	0.095531	8.185e-70	1.612e-67	1
hsa-miR-495	BNC2	0.622	91.2663	263	263	0.075047	6.523e-70	1.716e-67	1
hsa-miR-3128	BCL11A	1	0.000189126	197	197	0.068944	1.035e-69	2.039e-67	1
hsa-miR-29c-5p	BCL11A	0.796	78.4065	197	197	0.079167	1.084e-69	2.135e-67	1
hsa-miR-520e	BCL11A	1	0.000189126	197	197	0.075372	1.27e-69	2.502e-67	1
hsa-miR-29a-3p	BCL11A	1	0.000189126	197	197	0.097576	1.561e-69	3.075e-67	1
hsa-miR-377-5p	ZEB1	1	0.000189126	385	385	0.058164	9.122e-70	3.512e-67	1
hsa-miR-934	MSL3	0.959	57.5439	223	223	0.193811	1.937e-69	4.32e-67	1
hsa-miR-1301	BCL11A	0.936	62.2593	197	197	0.092557	2.64e-69	5.201e-67	1
hsa-miR-676-3p	BCL11A	1	0.000189126	197	197	0.076926	3.758e-69	7.403e-67	1
hsa-miR-381	TSHZ3	0.995	41.8528	190	190	0.084752	5.375e-69	1.021e-66	1
hsa-miR-520a-3p	BCL11A	1	0.000189126	197	197	0.117887	5.385e-69	1.061e-66	1
hsa-miR-195-5p	ZNF831	0.864	72.2049	202	202	0.070747	5.778e-69	1.167e-66	1
hsa-miR-3679-3p	BCL11A	1	0.000189126	197	197	0.071138	6.178e-69	1.217e-66	1
hsa-miR-892a	EBF1	1	0.000189126	232	232	0.052573	5.643e-69	1.309e-66	1
hsa-miR-527	BCL11A	0.761	81.5593	197	197	0.048674	1.393e-68	2.744e-66	1
hsa-miR-511	BCL11A	1	0.000189126	197	197	0.082585	1.871e-68	3.686e-66	1
hsa-miR-411-5p	BACH2	0.961	57.1053	142	142	0.076967	3.28e-68	4.658e-66	1
hsa-miR-138-1-3p	DEK	1	0.000189126	190	190	0.056065	2.559e-68	4.862e-66	1
hsa-miR-605	EBF1	1	0.000189126	232	232	0.062749	2.161e-68	5.014e-66	1
hsa-miR-20b-3p	FOXC1	0.699	85.6561	406	406	0.099061	1.526e-68	6.196e-66	1
hsa-miR-382-5p	FLI1	0.519	98.8327	273	273	0.061695	2.343e-68	6.396e-66	1
hsa-miR-34c-5p	LDB2	0.701	85.5366	220	220	0.096358	2.959e-68	6.51e-66	1
hsa-miR-186-3p	BCL11A	0.866	72.0169	197	197	0.086143	4.148e-68	8.172e-66	1
hsa-miR-1258	ERG	1	0.000189126	171	171	0.069918	6.824e-68	1.167e-65	1
hsa-miR-221-3p	BCL11A	0.661	88.8822	197	197	0.112107	7.027e-68	1.384e-65	1
hsa-miR-101-3p	EBF1	0.994	42.9842	232	232	0.082334	7.055e-68	1.637e-65	1
hsa-miR-335-3p	BCL11A	0.998	35.422	197	197	0.098714	1e-67	1.97e-65	1
hsa-miR-24-2-5p	BCL11A	0.577	94.8051	197	197	0.095096	1.327e-67	2.614e-65	1
hsa-miR-1307-3p	EZH2	0.914	65.901	100	100	0.111067	2.786e-67	2.786e-65	1
hsa-miR-27a-3p	BCL11A	0.999	30.3054	197	197	0.092884	1.496e-67	2.947e-65	1
hsa-miR-409-3p	EYA4	0.92	64.6001	41	41	0.143218	1.559e-66	6.392e-65	1
hsa-miR-19a-5p	BCL11A	1	0.000189126	197	197	0.068891	3.524e-67	6.942e-65	1
hsa-miR-146a-5p	POU2F2	0.53	98.1316	65	65	0.181257	2.032e-66	1.321e-64	1
hsa-miR-493-5p	RUNX2	0.541	97.0061	81	81	0.105957	2.442e-66	1.978e-64	1
hsa-miR-491-3p	BCL11A	1	0.000189126	197	197	0.081136	1.014e-66	1.998e-64	1
hsa-miR-135b-3p	KCMF1	0.932	62.9156	235	235	0.155189	8.894e-67	2.09e-64	1
hsa-miR-16-2-3p	BCL11A	1	0.000189126	197	197	0.100251	1.572e-66	3.097e-64	1
hsa-miR-150-3p	PLAGL1	1	0.000189126	234	234	0.081264	1.442e-66	3.374e-64	1
hsa-miR-3920	FOXC1	0.998	35.422	406	406	0.088666	8.635e-67	3.506e-64	1
hsa-miR-1236	BCL11A	0.933	62.756	197	197	0.077094	1.835e-66	3.615e-64	1
hsa-miR-223-5p	SCML4	1	0.000189126	91	91	0.134888	4.256e-66	3.873e-64	1
hsa-miR-125b-5p	ETS1	0.975	52.9929	147	147	0.077699	3.235e-66	4.755e-64	1
hsa-miR-141-3p	ERG	0.933	62.756	171	171	0.086671	4.312e-66	7.374e-64	1
hsa-miR-3667-5p	BCL11A	0.998	35.422	197	197	0.098011	3.859e-66	7.602e-64	1
hsa-miR-545-3p	BCL11A	1	0.000189126	197	197	0.064079	4.688e-66	9.235e-64	1
hsa-miR-20a-5p	EZH2	0.802	77.9487	100	100	0.129089	1.061e-65	1.061e-63	1
hsa-miR-505-5p	ESR1	0.967	55.6329	267	267	0.096149	3.994e-66	1.066e-63	1
hsa-miR-3653	MEOX1	0.999	30.3054	257	257	0.06816	4.639e-66	1.192e-63	1
hsa-miR-2355-3p	BCL11A	1	0.000189126	197	197	0.087782	6.057e-66	1.193e-63	1
hsa-miR-494	TSHZ2	0.98	51.2666	198	198	0.073093	7.018e-66	1.39e-63	1
hsa-miR-539-5p	ZFPM2	1	0.000189126	150	150	0.079061	1.153e-65	1.729e-63	1
hsa-miR-206	FLI1	0.83	75.3113	273	273	0.13084	6.385e-66	1.743e-63	1
hsa-miR-4328	EBF1	0.985	48.8707	232	232	0.003575	7.977e-66	1.851e-63	1
hsa-miR-29b-1-5p	BCL11A	0.998	35.422	197	197	0.082059	1.014e-65	1.998e-63	1
hsa-miR-29c-3p	TBX21	1	0.000189126	163	163	0.079643	1.289e-65	2.101e-63	1
hsa-miR-29c-3p	FOXA1	1	0.000189126	479	479	0.069506	4.659e-66	2.232e-63	1
hsa-miR-3680-3p	BCL11A	1	0.000189126	197	197	0.081197	1.239e-65	2.441e-63	1
hsa-miR-548u	PRRX1	0.707	85.1356	240	240	0.003122	1.111e-65	2.666e-63	1
hsa-miR-488-5p	TP63	1	0.000189126	117	117	0.068794	2.336e-65	2.733e-63	1
hsa-miR-338-5p	MAPK8IP1	0.988	47.4918	163	163	0.095332	1.988e-65	3.24e-63	1
hsa-miR-1283	KCMF1	0.623	91.2019	235	235	0.042384	1.467e-65	3.447e-63	1
hsa-miR-3140-3p	BCL11A	1	0.000189126	197	197	0.119734	2.23e-65	4.393e-63	1
hsa-let-7g-5p	BCL11A	0.955	58.4189	197	197	0.081165	2.266e-65	4.464e-63	1
hsa-miR-548k	FOXC1	1	0.000189126	406	406	0.070087	1.291e-65	5.241e-63	1
hsa-miR-409-3p	SALL1	1	0.000189126	76	76	0.146045	8.231e-65	6.256e-63	1
hsa-miR-98	BCL11A	0.966	55.8939	197	197	0.107576	3.258e-65	6.418e-63	1
hsa-miR-409-3p	PRDM6	0.931	63.0711	48	48	0.152533	1.422e-64	6.826e-63	1
hsa-let-7i-5p	BCL11A	0.878	70.192	197	197	0.073163	4.163e-65	8.201e-63	1
hsa-miR-99a-5p	ETS1	1	0.000189126	147	147	0.071612	6.674e-65	9.811e-63	1
hsa-miR-22-3p	TSHZ3	0.941	61.4501	190	190	0.071366	5.533e-65	1.051e-62	1
hsa-miR-22-3p	GLIS3	0.999	30.3054	112	112	0.076357	9.823e-65	1.1e-62	1
hsa-miR-203	BCL11A	0.972	53.8807	197	197	0.107486	5.734e-65	1.13e-62	1
hsa-miR-142-5p	TOX2	0.999	30.3054	47	47	0.199167	2.853e-64	1.341e-62	1
hsa-miR-2355-5p	BCL11A	1	0.000189126	197	197	0.085003	7.279e-65	1.434e-62	1
hsa-miR-486-3p	FOXC1	0.876	71.0221	406	406	0.111786	3.742e-65	1.519e-62	1
hsa-miR-125b-5p	TSHZ3	0.949	59.6114	190	190	0.079372	9.404e-65	1.787e-62	1
hsa-miR-383	BCL11A	0.901	67.5479	197	197	0.13725	9.07e-65	1.787e-62	1
hsa-miR-520a-3p	OSR1	0.84	74.3715	113	113	0.115891	1.669e-64	1.886e-62	1
hsa-miR-18b-5p	YBX1	0.99	46.3194	204	204	0.108834	9.685e-65	1.976e-62	1
hsa-miR-337-3p	RUNX1T1	0.821	76.4793	123	123	0.083094	2.145e-64	2.638e-62	1
hsa-miR-495	ZEB2	1	0.000189126	312	312	0.064749	9.527e-65	2.972e-62	1
hsa-miR-221-3p	PLAGL1	0.975	52.9929	234	234	0.099198	1.272e-64	2.976e-62	1
hsa-miR-758	RUNX1T1	1	0.000189126	123	123	0.077892	3.129e-64	3.849e-62	1
hsa-miR-93-5p	FOXA1	1	0.000189126	479	479	0.073071	8.734e-65	4.184e-62	1
hsa-let-7a-2-3p	BCL11A	0.999	30.3054	197	197	0.094505	2.148e-64	4.232e-62	1
hsa-miR-548a-3p	BCL11A	1	0.000189126	197	197	0.024853	2.315e-64	4.561e-62	1
hsa-miR-190a	BCL11A	0.943	61.1064	197	197	0.069991	2.741e-64	5.4e-62	1
hsa-miR-450b-5p	EBF1	0.99	46.3194	232	232	0.067015	2.332e-64	5.41e-62	1
hsa-miR-542-3p	TP63	1	0.000189126	117	117	0.09375	6.057e-64	7.087e-62	1
hsa-miR-223-5p	BCL11A	0.989	46.9549	197	197	0.103759	4.133e-64	8.142e-62	1
hsa-miR-374b-3p	BCL11A	1	0.000189126	197	197	0.063388	4.343e-64	8.556e-62	1
hsa-miR-199b-3p	ZEB2	1	0.000189126	312	312	0.056489	2.79e-64	8.705e-62	1
hsa-miR-548o-3p	ZNF831	0.999	30.3054	202	202	0.059759	5.279e-64	1.066e-61	1
hsa-miR-450b-5p	TSHZ2	0.898	67.9157	198	198	0.067859	5.535e-64	1.096e-61	1
hsa-miR-141-3p	BCL11A	0.934	62.5856	197	197	0.112527	6.113e-64	1.204e-61	1
hsa-miR-199a-3p	ZEB2	1	0.000189126	312	312	0.056442	3.996e-64	1.247e-61	1
hsa-miR-299-5p	MEOX2	1	0.000189126	163	163	0.067281	7.743e-64	1.262e-61	1
hsa-miR-186-5p	YBX1	1	0.000189126	204	204	0.095389	7.763e-64	1.584e-61	1
hsa-miR-133b	LDB2	0.616	91.6892	220	220	0.084542	1.114e-63	2.451e-61	1
hsa-miR-199a-5p	PLAGL1	1	0.000189126	234	234	0.064528	1.085e-63	2.539e-61	1
hsa-miR-3192	BCL11A	1	0.000189126	197	197	0.071906	1.519e-63	2.992e-61	1
hsa-miR-548d-3p	DEK	1	0.000189126	190	190	0.100435	1.755e-63	3.335e-61	1
hsa-miR-33a-3p	BCL11A	0.958	57.7506	197	197	0.092711	1.837e-63	3.619e-61	1
hsa-miR-206	EBF1	0.798	78.2484	232	232	0.137009	1.693e-63	3.928e-61	1
hsa-miR-381	ZFPM2	1	0.000189126	150	150	0.079662	2.745e-63	4.118e-61	1
hsa-miR-140-3p	BACH2	0.996	40.3642	142	142	0.093562	3.22e-63	4.572e-61	1
hsa-miR-181b-5p	BCL11A	1	0.000189126	197	197	0.078738	2.551e-63	5.025e-61	1
hsa-miR-134	PRDM6	0.873	71.3281	48	48	0.145714	1.131e-62	5.429e-61	1
hsa-miR-1301	EZH2	1	0.000189126	100	100	0.102471	6.682e-63	6.682e-61	1
hsa-miR-411-3p	ZEB2	1	0.000189126	312	312	0.061156	2.655e-63	8.284e-61	1
hsa-miR-149-5p	FOXA1	0.721	84.1936	479	479	0.064456	1.868e-63	8.948e-61	1
hsa-miR-493-3p	TSHZ3	0.676	87.9604	190	190	0.067477	9.189e-63	1.746e-60	1
hsa-miR-526b-3p	FOXC1	0.641	90.1032	406	406	0.036491	4.878e-63	1.98e-60	1
hsa-miR-548f	KCMF1	0.862	72.3931	235	235	0.063022	9.254e-63	2.175e-60	1
hsa-miR-493-5p	PITX2	0.995	41.8528	44	44	0.118016	5.648e-62	2.485e-60	1
hsa-miR-1245a	EBF1	1	0.000189126	232	232	0.057799	1.116e-62	2.589e-60	1
hsa-miR-143-3p	OSR1	1	0.000189126	113	113	0.094653	2.38e-62	2.689e-60	1
hsa-miR-150-5p	ETS1	0.653	89.3469	147	147	0.093968	1.997e-62	2.936e-60	1
hsa-miR-126-5p	EBF1	0.969	55.1026	232	232	0.062199	1.444e-62	3.35e-60	1
hsa-miR-379-3p	ZNF831	1	0.000189126	202	202	0.052334	1.679e-62	3.392e-60	1
hsa-miR-491-5p	SPIB	0.952	59.0083	130	130	0.070881	2.668e-62	3.468e-60	1
hsa-miR-576-5p	EZH2	1	0.000189126	100	100	0.118955	4.565e-62	4.565e-60	1
hsa-miR-410	RUNX1T1	1	0.000189126	123	123	0.078402	3.748e-62	4.61e-60	1
hsa-miR-379-5p	BACH2	0.966	55.8939	142	142	0.080104	3.46e-62	4.913e-60	1
hsa-miR-199a-5p	RUNX1T1	0.977	52.3486	123	123	0.070883	4.008e-62	4.93e-60	1
hsa-miR-148a-5p	BCL11A	1	0.000189126	197	197	0.073498	2.634e-62	5.189e-60	1
hsa-miR-502-3p	XBP1	0.94	61.6104	243	243	0.086377	2.183e-62	5.305e-60	1
hsa-miR-380-3p	EBF1	1	0.000189126	232	232	0.065014	2.41e-62	5.591e-60	1
hsa-miR-186-5p	ESR1	0.902	67.4195	267	267	0.087186	2.242e-62	5.986e-60	1
hsa-let-7c	RUNX1T1	0.986	48.4564	123	123	0.075949	5.004e-62	6.155e-60	1
hsa-let-7a-2-3p	EBF1	0.986	48.4564	232	232	0.074701	2.84e-62	6.589e-60	1
hsa-miR-199b-5p	RUNX1T1	0.999	30.3054	123	123	0.072998	5.395e-62	6.636e-60	1
hsa-miR-519e-3p	BCL11A	1	0.000189126	197	197	0.056301	4.646e-62	9.153e-60	1
hsa-miR-423-5p	FOXC1	0.995	41.8528	406	406	0.073084	4.351e-62	1.767e-59	1
hsa-miR-99a-3p	BCL11A	1	0.000189126	197	197	0.088297	1.515e-61	2.985e-59	1
hsa-miR-185-3p	BCL11A	0.762	81.4904	197	197	0.093929	1.523e-61	3e-59	1
hsa-miR-28-3p	PLAGL1	0.993	43.8171	234	234	0.084766	1.305e-61	3.054e-59	1
hsa-miR-539-5p	TSHZ3	1	0.000189126	190	190	0.067332	1.647e-61	3.129e-59	1
hsa-miR-128	BCL11A	1	0.000189126	197	197	0.081453	2.05e-61	4.038e-59	1
hsa-miR-409-3p	ZEB2	0.81	77.3217	312	312	0.068056	1.34e-61	4.181e-59	1
hsa-miR-1287	BCL11A	1	0.000189126	197	197	0.081754	4.124e-61	8.124e-59	1
hsa-miR-3926	ZCCHC24	0.786	79.1438	272	272	0.051361	4.712e-61	1.282e-58	1
hsa-miR-3202	BCL11A	1	0.000189126	197	197	0.062177	6.767e-61	1.333e-58	1
hsa-miR-3117-3p	BCL11A	0.999	30.3054	197	197	0.074442	7.813e-61	1.539e-58	1
hsa-let-7c	PRRX1	1	0.000189126	240	240	0.071641	8.55e-61	2.052e-58	1
hsa-miR-136-5p	TSHZ2	0.997	38.6214	198	198	0.066797	1.624e-60	3.216e-58	1
hsa-miR-181d	BCL11A	1	0.000189126	197	197	0.09263	1.644e-60	3.239e-58	1
hsa-miR-944	BCL11A	1	0.000189126	197	197	0.100371	1.868e-60	3.68e-58	1
hsa-miR-885-3p	BCL11A	0.64	90.1715	197	197	0.068893	1.967e-60	3.875e-58	1
hsa-miR-3926	OSR1	1	0.000189126	113	113	0.073682	4.286e-60	4.843e-58	1
hsa-miR-651	BCL11A	1	0.000189126	197	197	0.0847	2.698e-60	5.315e-58	1
hsa-miR-517-5p	FOXC1	1	0.000189126	406	406	0.032604	1.365e-60	5.542e-58	1
hsa-miR-485-3p	TSHZ3	1	0.000189126	190	190	0.07063	2.981e-60	5.664e-58	1
hsa-miR-3609	FOXC1	0.999	30.3054	406	406	0.104134	2.507e-60	1.018e-57	1
hsa-miR-539-5p	TSHZ2	0.969	55.1026	198	198	0.067984	5.88e-60	1.164e-57	1
hsa-miR-18a-5p	EZH2	0.965	56.1655	100	100	0.148855	1.188e-59	1.188e-57	1
hsa-miR-29b-3p	NDN	1	0.000189126	282	282	0.06976	4.385e-60	1.237e-57	1
hsa-miR-758	ZEB2	0.822	76.4044	312	312	0.057402	4.018e-60	1.254e-57	1
hsa-miR-148a-3p	BCL11A	1	0.000189126	197	197	0.074949	7.922e-60	1.561e-57	1
hsa-miR-381	HOXA7	1	0.000189126	84	84	0.129027	2.87e-59	2.411e-57	1
hsa-miR-3934	BCL11A	0.991	45.6945	197	197	0.079097	1.926e-59	3.794e-57	1
hsa-miR-181c-5p	BCL11A	0.803	77.866	197	197	0.086543	1.952e-59	3.845e-57	1
hsa-miR-15b-5p	BCL11A	0.702	85.4732	197	197	0.093368	2.055e-59	4.048e-57	1
hsa-miR-643	BCL11A	0.992	44.957	197	197	0.06285	2.63e-59	5.181e-57	1
hsa-miR-493-5p	SALL1	1	0.000189126	76	76	0.105814	7.119e-59	5.41e-57	1
hsa-miR-301b	FOXA1	1	0.000189126	479	479	0.078582	1.197e-59	5.734e-57	1
hsa-miR-20a-3p	TAF4B	0.908	66.6779	170	170	0.111995	3.962e-59	6.735e-57	1
hsa-miR-889	ZFPM2	1	0.000189126	150	150	0.082919	5.057e-59	7.585e-57	1
hsa-miR-135b-5p	FOXN2	0.992	44.957	309	309	0.147193	3.41e-59	1.054e-56	1
hsa-miR-548v	BCL11A	0.961	57.1053	197	197	0.081527	6.464e-59	1.273e-56	1
hsa-miR-143-3p	TP63	1	0.000189126	117	117	0.090923	1.092e-58	1.278e-56	1
hsa-miR-148b-5p	EBF1	1	0.000189126	232	232	0.072493	5.609e-59	1.301e-56	1
hsa-miR-152	NKX3-2	1	0.000189126	70	70	0.089584	2.212e-58	1.548e-56	1
hsa-miR-431-3p	RUNX1T1	0.765	81.2149	123	123	0.083481	1.335e-58	1.642e-56	1
hsa-miR-17-3p	YBX1	0.789	78.9198	204	204	0.111896	1.16e-58	2.366e-56	1
hsa-let-7f-5p	EBF1	0.998	35.422	232	232	0.067651	1.435e-58	3.329e-56	1
hsa-miR-410	TBX18	0.932	62.9156	123	123	0.075256	3.87e-58	4.76e-56	1
hsa-miR-561-3p	BCL11A	0.995	41.8528	197	197	0.061251	2.618e-58	5.157e-56	1
hsa-let-7c	HIC1	0.999	30.3054	123	123	0.079204	4.201e-58	5.167e-56	1
hsa-miR-618	AFF3	1	0.000189126	256	256	0.080176	2.132e-58	5.458e-56	1
hsa-miR-652-3p	BCL11A	1	0.000189126	197	197	0.078107	3.554e-58	7.001e-56	1
hsa-miR-3926	TSHZ3	0.991	45.6945	190	190	0.060682	4.03e-58	7.657e-56	1
hsa-miR-33b-5p	MEOX2	0.996	40.3642	163	163	0.079923	5.491e-58	8.95e-56	1
hsa-miR-320c	BCL11A	0.89	68.8581	197	197	0.068777	4.737e-58	9.332e-56	1
hsa-miR-218-1-3p	ETS1	0.957	57.9431	147	147	0.057398	8.33e-58	1.225e-55	1
hsa-miR-410	BACH2	0.764	81.3473	142	142	0.080557	1.493e-57	2.12e-55	1
hsa-miR-3613-3p	BCL11A	0.987	48	197	197	0.064026	1.143e-57	2.252e-55	1
hsa-miR-377-5p	TSHZ3	1	0.000189126	190	190	0.069112	1.224e-57	2.326e-55	1
hsa-miR-211-5p	BCL11A	0.596	93.6299	197	197	0.068364	1.295e-57	2.551e-55	1
hsa-miR-27b-3p	BCL11A	0.999	30.3054	197	197	0.082696	1.309e-57	2.579e-55	1
hsa-miR-410	OSR1	0.824	76.2581	113	113	0.097308	2.307e-57	2.607e-55	1
hsa-miR-455-3p	ZNF462	1	0.000189126	100	100	0.1369	3.242e-57	3.242e-55	1
hsa-miR-140-5p	FOXN2	1	0.000189126	309	309	0.078529	1.29e-57	3.986e-55	1
hsa-miR-369-3p	EN1	1	0.000189126	135	135	0.083703	3.149e-57	4.251e-55	1
hsa-miR-1226-3p	BCL11A	0.887	69.1609	197	197	0.103564	2.255e-57	4.442e-55	1
hsa-miR-18a-5p	KCMF1	0.706	85.2045	235	235	0.128301	1.934e-57	4.545e-55	1
hsa-miR-624-5p	BCL11A	1	0.000189126	197	197	0.07137	2.49e-57	4.905e-55	1
hsa-miR-154-3p	TSHZ2	0.994	42.9842	198	198	0.063479	2.502e-57	4.954e-55	1
hsa-miR-323a-3p	ZFPM2	1	0.000189126	150	150	0.078571	3.69e-57	5.535e-55	1
hsa-miR-181a-5p	BCL11A	1	0.000189126	197	197	0.074897	2.81e-57	5.536e-55	1
hsa-miR-92a-3p	EZH2	1	0.000189126	100	100	0.106599	5.969e-57	5.969e-55	1
hsa-miR-19b-3p	TAF4B	0.825	76.1828	170	170	0.098075	3.683e-57	6.261e-55	1
hsa-miR-20a-5p	E2F3	1	0.000189126	119	119	0.11701	6.726e-57	8.004e-55	1
hsa-miR-141-5p	BCL11A	0.999	30.3054	197	197	0.07341	4.199e-57	8.272e-55	1
hsa-miR-16-2-3p	ZCCHC24	0.972	53.8807	272	272	0.076576	3.047e-57	8.288e-55	1
hsa-miR-17-5p	E2F3	0.97	54.8638	119	119	0.136751	7.113e-57	8.464e-55	1
hsa-miR-105-5p	DEK	0.612	92.6441	190	190	0.188329	5.17e-57	9.823e-55	1
hsa-miR-369-3p	EBF1	1	0.000189126	232	232	0.063966	4.49e-57	1.042e-54	1
hsa-miR-106a-3p	BCL11A	1	0.000189126	197	197	0.09656	5.908e-57	1.164e-54	1
hsa-miR-3158-3p	BCL11A	0.954	58.6196	197	197	0.076059	6.148e-57	1.211e-54	1
hsa-miR-584-5p	ZNF462	0.895	68.2732	100	100	0.15674	1.464e-56	1.464e-54	1
hsa-miR-200a-3p	BCL11A	1	0.000189126	197	197	0.097582	8.985e-57	1.77e-54	1
hsa-miR-217	BCL11A	1	0.000189126	197	197	0.092027	1.121e-56	2.208e-54	1
hsa-miR-411-3p	PLAGL1	0.675	88.0223	234	234	0.067809	1.1e-56	2.574e-54	1
hsa-miR-187-5p	BCL11A	1	0.000189126	197	197	0.129153	1.449e-56	2.855e-54	1
hsa-miR-2110	BCL11A	0.73	83.5973	197	197	0.097533	1.527e-56	3.008e-54	1
hsa-miR-760	FOXC1	1	0.000189126	406	406	0.082379	7.774e-57	3.156e-54	1
hsa-miR-144-3p	BCL11A	1	0.000189126	197	197	0.102852	1.815e-56	3.576e-54	1
hsa-miR-1285-3p	ZNF367	1	0.000189126	93	93	0.063042	4.284e-56	3.984e-54	1
hsa-miR-376c	EBF1	0.945	60.3862	232	232	0.071103	1.732e-56	4.018e-54	1
hsa-miR-3653	BCL11A	1	0.000189126	197	197	0.07561	3.59e-56	7.072e-54	1
hsa-miR-32-5p	BCL11A	1	0.000189126	197	197	0.091584	3.947e-56	7.776e-54	1
hsa-miR-409-5p	PLAGL1	0.993	43.8171	234	234	0.064434	3.586e-56	8.391e-54	1
hsa-miR-33b-5p	EBF1	1	0.000189126	232	232	0.080421	4.004e-56	9.289e-54	1
hsa-miR-155-5p	GATA3	0.553	96.2587	342	342	0.078188	3.107e-56	1.063e-53	1
hsa-miR-376b	BCL11A	0.921	64.4653	197	197	0.064248	5.875e-56	1.157e-53	1
hsa-let-7a-2-3p	BACH2	0.906	66.9194	142	142	0.077346	8.196e-56	1.164e-53	1
hsa-miR-758	FLI1	0.998	35.422	273	273	0.060564	4.471e-56	1.221e-53	1
hsa-miR-758	BACH2	1	0.000189126	142	142	0.068798	1.056e-55	1.5e-53	1
hsa-miR-30e-3p	MEOX2	1	0.000189126	163	163	0.073646	9.319e-56	1.519e-53	1
hsa-miR-106a-5p	EZH2	0.782	79.4299	100	100	0.113507	1.652e-55	1.652e-53	1
hsa-miR-889	PPARG	1	0.000189126	126	126	0.084441	1.771e-55	2.231e-53	1
hsa-miR-205-3p	BCL11A	0.999	30.3054	197	197	0.075615	1.167e-55	2.299e-53	1
hsa-miR-323a-3p	EBF1	1	0.000189126	232	232	0.067863	9.952e-56	2.309e-53	1
hsa-miR-101-3p	TSHZ2	1	0.000189126	198	198	0.073082	1.29e-55	2.554e-53	1
hsa-miR-320e	BCL11A	0.919	64.7361	197	197	0.074151	1.355e-55	2.669e-53	1
hsa-miR-196b-3p	BCL11A	0.921	64.4653	197	197	0.063941	1.477e-55	2.91e-53	1
hsa-miR-497-5p	OSR1	1	0.000189126	113	113	0.076097	2.668e-55	3.015e-53	1
hsa-miR-148a-3p	ESR1	0.999	30.3054	267	267	0.064659	1.138e-55	3.038e-53	1
hsa-miR-335-3p	PPARG	1	0.000189126	126	126	0.111288	2.573e-55	3.242e-53	1
hsa-miR-1262	BCL11A	0.954	58.6196	197	197	0.066799	1.667e-55	3.284e-53	1
hsa-miR-577	NOTCH1	0.928	63.4992	182	182	0.192598	2.182e-55	3.971e-53	1
hsa-miR-184	MEOX2	0.997	38.6214	163	163	0.129809	2.715e-55	4.425e-53	1
hsa-miR-556-3p	BCL11A	0.999	30.3054	197	197	0.081584	2.247e-55	4.427e-53	1
hsa-miR-3658	ZFPM2	0.929	63.3578	150	150	0.015171	3.366e-55	5.049e-53	1
hsa-miR-507	FOXC1	0.854	73.1224	406	406	0.053816	1.433e-55	5.818e-53	1
hsa-miR-424-3p	BCL11A	0.999	30.3054	197	197	0.075552	2.972e-55	5.855e-53	1
hsa-miR-23b-3p	BCL11A	1	0.000189126	197	197	0.07242	3.437e-55	6.771e-53	1
hsa-miR-409-5p	TSHZ3	0.999	30.3054	190	190	0.073797	3.582e-55	6.806e-53	1
hsa-miR-145-5p	PLAGL1	0.699	85.6561	234	234	0.067297	3.108e-55	7.273e-53	1
hsa-miR-16-1-3p	SUV39H2	0.944	60.5676	259	259	0.05716	2.897e-55	7.503e-53	1
hsa-miR-3678-5p	BCL11A	0.811	77.2531	197	197	0.064521	3.809e-55	7.504e-53	1
hsa-miR-577	E2F3	0.991	45.6945	119	119	0.212284	6.724e-55	8.002e-53	1
hsa-miR-320d	BCL11A	0.685	87.4091	197	197	0.083507	5.035e-55	9.919e-53	1
hsa-miR-32-3p	ZNF831	0.998	35.422	202	202	0.066157	5.675e-55	1.146e-52	1
hsa-miR-218-5p	EBF3	1	0.000189126	79	79	0.090931	1.54e-54	1.217e-52	1
hsa-miR-183-5p	BCL11A	1	0.000189126	197	197	0.084686	7.07e-55	1.393e-52	1
hsa-miR-493-3p	SALL1	1	0.000189126	76	76	0.096339	2.749e-54	2.089e-52	1
hsa-miR-1193	EBF1	0.999	30.3054	232	232	0.048526	9.265e-55	2.149e-52	1
hsa-miR-30c-5p	BCL11A	0.947	60.0144	197	197	0.070986	1.843e-54	3.631e-52	1
hsa-miR-590-3p	ESR1	0.996	40.3642	267	267	0.091304	1.824e-54	4.87e-52	1
hsa-miR-3692-3p	BCL11A	1	0.000189126	197	197	0.059883	2.936e-54	5.784e-52	1
hsa-let-7a-3p	TSHZ2	0.996	40.3642	198	198	0.071116	2.957e-54	5.855e-52	1
hsa-miR-337-3p	TP63	0.768	80.9961	117	117	0.090735	5.006e-54	5.857e-52	1
hsa-miR-381	HIC1	1	0.000189126	123	123	0.097129	5.474e-54	6.733e-52	1
hsa-miR-26a-5p	BCL11A	1	0.000189126	197	197	0.077035	3.633e-54	7.157e-52	1
hsa-miR-146a-3p	KCMF1	0.717	84.4637	235	235	0.111617	4.942e-54	1.161e-51	1
hsa-miR-505-3p	KCMF1	0.536	97.3269	235	235	0.125538	5.485e-54	1.289e-51	1
hsa-miR-2277-3p	BCL11A	1	0.000189126	197	197	0.081067	6.897e-54	1.359e-51	1
hsa-miR-654-5p	PRDM6	0.998	35.422	48	48	0.11926	2.91e-53	1.397e-51	1
hsa-miR-3927	BCL11A	1	0.000189126	197	197	0.058041	7.683e-54	1.514e-51	1
hsa-miR-411-5p	RUNX1T1	1	0.000189126	123	123	0.075561	1.289e-53	1.585e-51	1
hsa-miR-3684	BCL11A	1	0.000189126	197	197	0.094105	9.178e-54	1.808e-51	1
hsa-miR-204-5p	ZEB1	1	0.000189126	385	385	0.090212	5.38e-54	2.071e-51	1
hsa-miR-136-3p	TP63	0.972	53.8807	117	117	0.086124	2.091e-53	2.446e-51	1
hsa-miR-154-3p	LDB2	1	0.000189126	220	220	0.062506	1.298e-53	2.856e-51	1
hsa-miR-3143	SUV39H2	0.963	56.6374	259	259	0.052897	1.135e-53	2.94e-51	1
hsa-miR-200c-3p	ZEB1	1	0.000189126	385	385	0.064944	8.22e-54	3.165e-51	1
hsa-miR-20a-3p	EZH2	1	0.000189126	100	100	0.112893	3.381e-53	3.381e-51	1
hsa-miR-520a-3p	TP63	0.883	69.6177	117	117	0.119245	3.142e-53	3.676e-51	1
hsa-miR-219-5p	BCL11A	1	0.000189126	197	197	0.085108	1.964e-53	3.869e-51	1
hsa-miR-3164	KCMF1	0.997	38.6214	235	235	0.05594	1.788e-53	4.202e-51	1
hsa-miR-1229	BCL11A	1	0.000189126	197	197	0.094732	2.154e-53	4.243e-51	1
hsa-miR-141-3p	ZCCHC24	1	0.000189126	272	272	0.086248	1.601e-53	4.355e-51	1
hsa-miR-10b-5p	HOXA7	1	0.000189126	84	84	0.087827	6.237e-53	5.239e-51	1
hsa-miR-17-3p	ZNF462	0.998	35.422	100	100	0.123938	5.864e-53	5.864e-51	1
hsa-miR-199b-5p	CSDC2	0.842	74.1896	76	76	0.104015	7.973e-53	6.059e-51	1
hsa-miR-450b-5p	BCL11A	1	0.000189126	197	197	0.07708	3.637e-53	7.165e-51	1
hsa-miR-363-3p	BCL11A	1	0.000189126	197	197	0.079137	3.753e-53	7.393e-51	1
hsa-miR-130a-5p	PLAGL1	1	0.000189126	234	234	0.080004	3.25e-53	7.605e-51	1
hsa-miR-330-3p	BCL11A	0.999	30.3054	197	197	0.077902	3.929e-53	7.74e-51	1
hsa-miR-379-3p	BNC2	0.977	52.3486	263	263	0.050448	2.952e-53	7.764e-51	1
hsa-miR-196b-5p	BCL11A	0.996	40.3642	197	197	0.101172	4.267e-53	8.406e-51	1
hsa-miR-409-3p	RUNX1T1	0.722	84.1251	123	123	0.077637	7.64e-53	9.397e-51	1
hsa-miR-584-5p	ETS1	0.999	30.3054	147	147	0.116931	6.442e-53	9.47e-51	1
hsa-miR-34c-5p	PPARG	0.897	68.0241	126	126	0.103699	7.587e-53	9.56e-51	1
hsa-miR-455-3p	WWTR1	1	0.000189126	226	226	0.101114	4.797e-53	1.084e-50	1
hsa-miR-494	ZEB2	0.92	64.6001	312	312	0.060122	4.475e-53	1.396e-50	1
hsa-miR-199a-5p	HOXC8	0.943	61.1064	32	32	0.1584	4.387e-52	1.404e-50	1
hsa-miR-16-5p	BCL11A	0.988	47.4918	197	197	0.089481	8.984e-53	1.77e-50	1
hsa-miR-340-5p	BCL11A	0.999	30.3054	197	197	0.068126	9.027e-53	1.778e-50	1
hsa-miR-493-5p	TBX18	0.613	92.5829	123	123	0.070665	1.597e-52	1.964e-50	1
hsa-let-7a-2-3p	ZNF831	0.833	74.9716	202	202	0.068974	9.973e-53	2.015e-50	1
hsa-miR-200b-3p	BNC2	1	0.000189126	263	263	0.067773	9.737e-53	2.561e-50	1
hsa-miR-431-5p	EN1	0.992	44.957	135	135	0.074919	1.911e-52	2.58e-50	1
hsa-miR-183-3p	BCL11A	1	0.000189126	197	197	0.082181	1.338e-52	2.636e-50	1
hsa-miR-141-3p	TSHZ3	0.999	30.3054	190	190	0.085098	1.403e-52	2.666e-50	1
hsa-miR-1278	BCL11A	1	0.000189126	197	197	0.061302	1.414e-52	2.786e-50	1
hsa-miR-671-5p	LDB2	0.999	30.3054	220	220	0.074528	1.287e-52	2.831e-50	1
hsa-miR-410	HOXA7	0.989	46.9549	84	84	0.100894	3.381e-52	2.84e-50	1
hsa-let-7c	ZCCHC24	0.876	71.0221	272	272	0.065846	1.114e-52	3.03e-50	1
hsa-miR-3688-3p	BCL11A	1	0.000189126	197	197	0.064294	1.641e-52	3.233e-50	1
hsa-miR-802	WWTR1	1	0.000189126	226	226	0.045968	1.885e-52	4.26e-50	1
hsa-miR-592	BCL11A	0.999	30.3054	197	197	0.079215	3.543e-52	6.98e-50	1
hsa-miR-200c-3p	BNC2	0.995	41.8528	263	263	0.067462	2.701e-52	7.104e-50	1
hsa-miR-141-3p	BNC2	0.969	55.1026	263	263	0.082334	3.071e-52	8.077e-50	1
hsa-miR-101-3p	FLI1	0.976	52.641	273	273	0.065337	3.685e-52	1.006e-49	1
hsa-miR-135b-5p	ZSWIM4	0.986	48.4564	133	133	0.178573	7.661e-52	1.019e-49	1
hsa-miR-944	ERG	1	0.000189126	171	171	0.077307	7.052e-52	1.206e-49	1
hsa-miR-323a-3p	TSHZ2	1	0.000189126	198	198	0.068181	7.552e-52	1.495e-49	1
hsa-miR-301a-3p	BCL11A	0.903	67.2952	197	197	0.094785	7.599e-52	1.497e-49	1
hsa-miR-374a-5p	GATA3	0.556	96.0743	342	342	0.064096	4.634e-52	1.585e-49	1
hsa-let-7i-3p	NFIL3	0.95	59.4113	136	136	0.083652	1.211e-51	1.647e-49	1
hsa-miR-3942-5p	BCL11A	1	0.000189126	197	197	0.070628	8.495e-52	1.674e-49	1
hsa-miR-3662	E2F8	0.957	57.9431	103	103	0.095652	1.652e-51	1.702e-49	1
hsa-miR-381	BHLHE22	1	0.000189126	61	61	0.124711	2.922e-51	1.782e-49	1
hsa-miR-3675-3p	REST	0.697	85.8061	145	145	0.006978	1.41e-51	2.044e-49	1
hsa-miR-379-3p	PLAGL1	0.631	90.7041	234	234	0.052022	1.402e-51	3.281e-49	1
hsa-miR-412	MEOX2	0.886	69.2789	163	163	0.053437	2.13e-51	3.472e-49	1
hsa-miR-3681-5p	BCL11A	0.899	67.7898	197	197	0.073002	2.503e-51	4.931e-49	1
hsa-miR-432-5p	SNAI2	0.662	88.8149	66	66	0.101207	7.653e-51	5.051e-49	1
hsa-miR-494	LDB2	1	0.000189126	220	220	0.067302	2.367e-51	5.207e-49	1
hsa-miR-3606	EBF1	1	0.000189126	232	232	0.050132	2.367e-51	5.491e-49	1
hsa-miR-454-3p	E2F7	1	0.000189126	67	67	0.112186	9.61e-51	6.439e-49	1
hsa-miR-1179	BCL11A	1	0.000189126	197	197	0.092818	3.577e-51	7.047e-49	1
hsa-miR-200a-3p	ZEB1	1	0.000189126	385	385	0.07274	2.072e-51	7.977e-49	1
hsa-miR-380-3p	BNC2	0.992	44.957	263	263	0.063814	3.255e-51	8.561e-49	1
hsa-miR-380-3p	ZFPM2	1	0.000189126	150	150	0.064589	5.971e-51	8.957e-49	1
hsa-miR-450b-5p	OSR1	0.987	48	113	113	0.081377	8.149e-51	9.208e-49	1
hsa-miR-222-3p	ESR1	1	0.000189126	267	267	0.088412	3.968e-51	1.059e-48	1
hsa-miR-483-5p	BCL11A	0.77	80.312	197	197	0.080895	5.52e-51	1.087e-48	1
hsa-miR-656	BNC2	0.996	40.3642	263	263	0.054432	4.232e-51	1.113e-48	1
hsa-miR-382-5p	PPARG	0.992	44.957	126	126	0.069844	9.965e-51	1.256e-48	1
hsa-miR-204-5p	BCL11A	0.955	58.4189	197	197	0.123859	6.686e-51	1.317e-48	1
hsa-miR-628-3p	BCL11A	0.725	83.9182	197	197	0.066685	6.966e-51	1.372e-48	1
hsa-miR-144-5p	LDB2	0.999	30.3054	220	220	0.089511	6.544e-51	1.44e-48	1
hsa-miR-138-5p	DEK	0.984	49.3046	190	190	0.10735	7.705e-51	1.464e-48	1
hsa-miR-1912	FOXC1	0.922	64.3227	406	406	0.04492	3.633e-51	1.475e-48	1
hsa-miR-3619-5p	BCL11A	0.952	59.0083	197	197	0.112217	7.545e-51	1.486e-48	1
hsa-miR-708-5p	NKX3-2	0.611	92.7094	70	70	0.0817	2.164e-50	1.515e-48	1
hsa-miR-539-5p	RUNX2	0.999	30.3054	81	81	0.098851	1.927e-50	1.561e-48	1
hsa-miR-944	FLI1	0.988	47.4918	273	273	0.075815	5.763e-51	1.573e-48	1
hsa-miR-410	PITX2	0.999	30.3054	44	44	0.126577	3.737e-50	1.644e-48	1
hsa-miR-431-3p	EN1	0.813	77.1076	135	135	0.078198	1.22e-50	1.647e-48	1
hsa-miR-369-5p	BACH2	0.833	74.9716	142	142	0.069062	1.172e-50	1.664e-48	1
hsa-let-7g-3p	ZNF831	0.832	75.08	202	202	0.064906	8.814e-51	1.78e-48	1
hsa-miR-378a-3p	YBX1	0.999	30.3054	204	204	0.080684	1.025e-50	2.091e-48	1
hsa-miR-199a-5p	TCF4	0.978	52.0323	104	104	0.071164	2.111e-50	2.195e-48	1
hsa-miR-218-1-3p	TP63	1	0.000189126	117	117	0.071828	1.905e-50	2.229e-48	1
hsa-miR-199b-5p	HOXC8	0.523	98.5776	32	32	0.147775	6.982e-50	2.234e-48	1
hsa-miR-183-3p	TSHZ2	0.794	78.5571	198	198	0.065532	1.252e-50	2.479e-48	1
hsa-miR-573	BCL11A	1	0.000189126	197	197	0.064092	1.461e-50	2.878e-48	1
hsa-miR-381	EBF3	1	0.000189126	79	79	0.098633	4.502e-50	3.557e-48	1
hsa-miR-708-3p	ZEB1	0.631	90.7041	385	385	0.061516	9.259e-51	3.565e-48	1
hsa-miR-548d-3p	SNRPD1	1	0.000189126	110	110	0.114434	3.571e-50	3.928e-48	1
hsa-miR-221-3p	ESR1	0.944	60.5676	267	267	0.087011	1.517e-50	4.05e-48	1
hsa-miR-16-1-3p	BCL11A	1	0.000189126	197	197	0.068186	2.089e-50	4.115e-48	1
hsa-miR-93-5p	E2F3	0.697	85.8061	119	119	0.096492	3.61e-50	4.296e-48	1
hsa-miR-576-5p	E2F3	0.93	63.2023	119	119	0.117903	3.617e-50	4.304e-48	1
hsa-miR-1263	E2F3	0.997	38.6214	119	119	0.011043	4.507e-50	5.363e-48	1
hsa-miR-379-3p	BCL11A	1	0.000189126	197	197	0.057703	3.953e-50	7.787e-48	1
hsa-miR-30e-3p	ETS1	0.977	52.3486	147	147	0.069865	5.462e-50	8.029e-48	1
hsa-miR-454-3p	ZNF367	1	0.000189126	93	93	0.112157	1.056e-49	9.821e-48	1
hsa-miR-377-3p	BCL11A	0.978	52.0323	197	197	0.082328	5.076e-50	1e-47	1
hsa-miR-195-5p	BCL11A	0.957	57.9431	197	197	0.081026	5.098e-50	1.004e-47	1
hsa-miR-548b-5p	TAF4B	1	0.000189126	170	170	0.072465	6.119e-50	1.04e-47	1
hsa-miR-1283	E2F3	1	0.000189126	119	119	0.047855	1.027e-49	1.222e-47	1
hsa-miR-331-5p	BCL11A	0.859	72.6824	197	197	0.079589	6.249e-50	1.231e-47	1
hsa-miR-493-5p	ZEB2	1	0.000189126	312	312	0.057237	4.366e-50	1.362e-47	1
hsa-miR-204-5p	ZCCHC24	0.959	57.5439	272	272	0.086445	5.352e-50	1.456e-47	1
hsa-miR-548d-3p	KCMF1	0.982	50.4983	235	235	0.091539	7.168e-50	1.684e-47	1
hsa-miR-143-3p	EBF3	0.743	82.7428	79	79	0.085583	2.665e-49	2.105e-47	1
hsa-miR-92a-3p	E2F3	1	0.000189126	119	119	0.101252	1.875e-49	2.231e-47	1
hsa-miR-376c	BCL11A	1	0.000189126	197	197	0.078979	1.239e-49	2.441e-47	1
hsa-miR-19a-3p	TAF4B	0.866	72.0169	170	170	0.118208	1.529e-49	2.599e-47	1
hsa-miR-539-5p	MSC	0.614	92.4533	147	147	0.066661	1.976e-49	2.905e-47	1
hsa-miR-494	ZFPM2	1	0.000189126	150	150	0.069802	2.14e-49	3.21e-47	1
hsa-miR-888-5p	ZEB2	0.784	79.2848	312	312	0.020167	1.123e-49	3.504e-47	1
hsa-let-7a-2-3p	FLI1	1	0.000189126	273	273	0.071886	1.344e-49	3.669e-47	1
hsa-miR-335-5p	EBF1	1	0.000189126	232	232	0.091185	1.712e-49	3.972e-47	1
hsa-miR-497-3p	BCL11A	1	0.000189126	197	197	0.070236	2.295e-49	4.521e-47	1
hsa-miR-218-5p	BCL11A	1	0.000189126	197	197	0.07953	2.315e-49	4.561e-47	1
hsa-miR-135b-5p	TBX19	0.99	46.3194	114	114	0.200929	4.493e-49	5.122e-47	1
hsa-miR-28-3p	WWTR1	1	0.000189126	226	226	0.086128	2.386e-49	5.392e-47	1
hsa-miR-99b-3p	BCL11A	0.999	30.3054	197	197	0.081125	2.798e-49	5.512e-47	1
hsa-miR-199a-3p	FOXQ1	1	0.000189126	64	64	0.093577	8.615e-49	5.514e-47	1
hsa-miR-363-3p	IKZF1	0.61	92.7663	270	270	0.06675	2.098e-49	5.665e-47	1
hsa-miR-199b-3p	FOXQ1	0.998	35.422	64	64	0.093559	9.04e-49	5.786e-47	1
hsa-miR-93-5p	ZNF367	0.995	41.8528	93	93	0.117975	6.48e-49	6.026e-47	1
hsa-miR-519c-3p	BCL11A	0.979	51.6176	197	197	0.053589	3.467e-49	6.83e-47	1
hsa-miR-146a-3p	DEK	0.999	30.3054	190	190	0.112527	3.671e-49	6.975e-47	1
hsa-miR-200a-3p	TSHZ3	1	0.000189126	190	190	0.074336	4.181e-49	7.944e-47	1
hsa-miR-199b-5p	HOXA7	0.973	53.614	84	84	0.081499	9.596e-49	8.061e-47	1
hsa-miR-206	BACH2	0.943	61.1064	142	142	0.134518	5.747e-49	8.161e-47	1
hsa-miR-200b-3p	ZEB1	1	0.000189126	385	385	0.066766	2.281e-49	8.782e-47	1
hsa-miR-323a-3p	GLIS3	1	0.000189126	112	112	0.073035	7.911e-49	8.86e-47	1
hsa-miR-487b	EN1	1	0.000189126	135	135	0.07748	8.022e-49	1.083e-46	1
hsa-miR-96-5p	TSHZ2	1	0.000189126	198	198	0.067955	5.49e-49	1.087e-46	1
hsa-miR-139-5p	ETS1	0.919	64.7361	147	147	0.071222	8.696e-49	1.278e-46	1
hsa-miR-379-5p	TGFB1I1	0.59	94.0168	123	123	0.14649	1.043e-48	1.283e-46	1
hsa-miR-889	BACH2	0.968	55.3873	142	142	0.070412	9.976e-49	1.417e-46	1
hsa-miR-548e	BCL11A	1	0.000189126	197	197	0.077918	7.88e-49	1.552e-46	1
hsa-miR-23c	BCL11A	1	0.000189126	197	197	0.065175	8.115e-49	1.599e-46	1
hsa-miR-582-5p	IKZF1	0.556	96.0743	270	270	0.092753	6.067e-49	1.638e-46	1
hsa-miR-34a-3p	BCL11A	1	0.000189126	197	197	0.070611	8.793e-49	1.732e-46	1
hsa-miR-542-3p	BACH2	1	0.000189126	142	142	0.069421	1.265e-48	1.796e-46	1
hsa-miR-103a-2-5p	BCL11A	0.879	70.0445	197	197	0.083609	9.34e-49	1.84e-46	1
hsa-miR-409-3p	BACH2	1	0.000189126	142	142	0.07588	1.345e-48	1.91e-46	1
hsa-miR-495	BACH2	0.904	67.1655	142	142	0.078421	1.362e-48	1.934e-46	1
hsa-miR-148b-3p	BCL11A	0.999	30.3054	197	197	0.066102	1.067e-48	2.102e-46	1
hsa-miR-410	ETS1	0.979	51.6176	147	147	0.078799	1.435e-48	2.109e-46	1
hsa-miR-3662	BCL11A	1	0.000189126	197	197	0.102073	1.353e-48	2.665e-46	1
hsa-miR-3156-5p	AFF4	0.962	56.8946	244	244	0.026136	1.213e-48	2.96e-46	1
hsa-miR-488-3p	BNC1	1	0.000189126	64	64	0.115688	4.933e-48	3.157e-46	1
hsa-miR-452-3p	KCMF1	1	0.000189126	235	235	0.128429	1.383e-48	3.25e-46	1
hsa-miR-3143	BCL11A	1	0.000189126	197	197	0.060399	1.675e-48	3.3e-46	1
hsa-miR-377-5p	TBX18	0.999	30.3054	123	123	0.069457	2.808e-48	3.454e-46	1
hsa-miR-181a-3p	BCL11A	1	0.000189126	197	197	0.075434	1.758e-48	3.463e-46	1
hsa-miR-361-3p	BCL11A	0.854	73.1224	197	197	0.075518	1.791e-48	3.528e-46	1
hsa-miR-1322	ZEB2	0.958	57.7506	312	312	0.02248	1.321e-48	4.122e-46	1
hsa-miR-431-5p	ZEB2	0.764	81.3473	312	312	0.053548	1.437e-48	4.483e-46	1
hsa-miR-455-3p	TCF7L1	0.992	44.957	132	132	0.136173	4.041e-48	5.334e-46	1
hsa-miR-30d-3p	BCL11A	1	0.000189126	197	197	0.08847	2.755e-48	5.427e-46	1
hsa-miR-487a	LDB2	1	0.000189126	220	220	0.053463	2.491e-48	5.48e-46	1
hsa-miR-127-5p	ZEB2	0.593	93.8313	312	312	0.05826	1.988e-48	6.203e-46	1
hsa-miR-125b-2-3p	ID4	0.704	85.3321	58	58	0.14413	1.331e-47	7.72e-46	1
hsa-miR-522-3p	E2F3	1	0.000189126	119	119	0.049593	7.148e-48	8.506e-46	1
hsa-miR-496	RUNX1T1	0.877	70.3655	123	123	0.071424	6.933e-48	8.528e-46	1
hsa-miR-381	SNAI2	0.846	73.8342	66	66	0.115739	1.348e-47	8.897e-46	1
hsa-miR-542-3p	RUNX1T1	0.999	30.3054	123	123	0.075032	7.339e-48	9.027e-46	1
hsa-miR-23a-3p	PLAGL1	1	0.000189126	234	234	0.081605	4.605e-48	1.078e-45	1
hsa-miR-656	LDB2	1	0.000189126	220	220	0.053482	4.973e-48	1.094e-45	1
hsa-miR-301b	ZCCHC24	0.911	66.3066	272	272	0.085326	4.675e-48	1.272e-45	1
hsa-miR-3911	BCL11A	0.832	75.08	197	197	0.102271	6.53e-48	1.286e-45	1
hsa-miR-3683	RUNX1T1	0.958	57.7506	123	123	0.004547	1.097e-47	1.349e-45	1
hsa-miR-1	TAL1	1	0.000189126	72	72	0.092847	2.049e-47	1.475e-45	1
hsa-miR-889	RUNX1T1	1	0.000189126	123	123	0.07094	1.238e-47	1.523e-45	1
hsa-miR-299-3p	TSHZ2	0.622	91.2663	198	198	0.048585	7.744e-48	1.533e-45	1
hsa-miR-3176	BCL11A	0.961	57.1053	197	197	0.087494	7.843e-48	1.545e-45	1
hsa-miR-1253	POU4F2	0.994	42.9842	381	381	0.333939	4.09e-48	1.558e-45	1
hsa-miR-379-5p	EN1	0.96	57.3267	135	135	0.087967	1.155e-47	1.559e-45	1
hsa-miR-3910	BCL11A	1	0.000189126	197	197	0.074371	8.829e-48	1.739e-45	1
hsa-miR-889	TBX18	0.949	59.6114	123	123	0.080122	1.61e-47	1.98e-45	1
hsa-miR-493-5p	ANKRD1	0.983	50.1019	98	98	0.072661	2.077e-47	2.035e-45	1
hsa-miR-155-3p	FOXN2	0.999	30.3054	309	309	0.072015	6.594e-48	2.038e-45	1
hsa-miR-655	ZFPM2	0.936	62.2593	150	150	0.060595	1.429e-47	2.144e-45	1
hsa-miR-106b-5p	E2F2	0.576	94.8656	68	68	0.112222	3.354e-47	2.281e-45	1
hsa-miR-337-3p	SNAI2	0.906	66.9194	66	66	0.097031	3.547e-47	2.341e-45	1
hsa-miR-520b	BCL11A	1	0.000189126	197	197	0.043311	1.195e-47	2.354e-45	1
hsa-miR-96-5p	PLAGL1	1	0.000189126	234	234	0.070016	1.063e-47	2.487e-45	1
hsa-miR-200c-3p	FLI1	0.998	35.422	273	273	0.06227	9.303e-48	2.54e-45	1
hsa-miR-513c-5p	FOXC1	1	0.000189126	406	406	0.053722	6.924e-48	2.811e-45	1
hsa-miR-520c-3p	BCL11A	0.984	49.3046	197	197	0.043352	1.54e-47	3.034e-45	1
hsa-miR-301a-3p	ZCCHC24	0.958	57.7506	272	272	0.084835	1.125e-47	3.06e-45	1
hsa-miR-3607-5p	BCL11A	1	0.000189126	197	197	0.077596	1.637e-47	3.225e-45	1
hsa-miR-3129-5p	ALX4	0.808	77.4849	102	102	0.077189	3.193e-47	3.257e-45	1
hsa-miR-369-3p	MEOX2	1	0.000189126	163	163	0.070546	2.148e-47	3.501e-45	1
hsa-miR-29b-3p	BCL11A	1	0.000189126	197	197	0.079401	1.779e-47	3.505e-45	1
hsa-miR-660-5p	ESR1	0.659	88.9968	267	267	0.069121	1.497e-47	3.997e-45	1
hsa-miR-127-5p	ZNF831	0.741	82.871	202	202	0.059244	2.123e-47	4.288e-45	1
hsa-miR-126-5p	LDB2	0.85	73.4806	220	220	0.054633	1.967e-47	4.327e-45	1
hsa-miR-500a-3p	EZH2	1	0.000189126	100	100	0.099377	4.367e-47	4.367e-45	1
hsa-miR-487a	TSHZ2	0.929	63.3578	198	198	0.05706	2.248e-47	4.451e-45	1
hsa-miR-2276	BCL11A	0.875	71.128	197	197	0.074234	3.228e-47	6.359e-45	1
hsa-miR-155-5p	MSL3	0.516	99.013	223	223	0.084375	2.857e-47	6.371e-45	1
hsa-miR-429	NDN	1	0.000189126	282	282	0.082223	2.307e-47	6.506e-45	1
hsa-miR-31-3p	FOXN2	0.957	57.9431	309	309	0.082265	2.106e-47	6.508e-45	1
hsa-miR-331-3p	BCL11A	0.999	30.3054	197	197	0.070567	3.364e-47	6.627e-45	1
hsa-miR-125b-5p	EN1	0.891	68.7397	135	135	0.084049	4.924e-47	6.647e-45	1
hsa-miR-589-5p	BCL11A	1	0.000189126	197	197	0.086428	3.675e-47	7.24e-45	1
hsa-miR-539-5p	ZEB1	1	0.000189126	385	385	0.064657	1.928e-47	7.423e-45	1
hsa-miR-27a-3p	GATA3	0.95	59.4113	342	342	0.070976	2.207e-47	7.548e-45	1
hsa-miR-542-3p	ETS1	0.917	65.0227	147	147	0.070964	5.709e-47	8.392e-45	1
hsa-miR-548d-5p	ATRX	0.653	89.3469	134	134	0.003613	6.95e-47	9.313e-45	1
hsa-miR-29a-3p	POU2F2	0.881	69.8342	65	65	0.107793	1.447e-46	9.406e-45	1
hsa-miR-484	BCL11A	1	0.000189126	197	197	0.074866	4.776e-47	9.409e-45	1
hsa-miR-22-3p	FOSL1	1	0.000189126	110	110	0.071811	9.142e-47	1.006e-44	1
hsa-miR-299-5p	LDB2	1	0.000189126	220	220	0.062529	4.634e-47	1.019e-44	1
hsa-miR-641	BCL11A	0.988	47.4918	197	197	0.069229	5.557e-47	1.095e-44	1
hsa-miR-199b-5p	OSR1	1	0.000189126	113	113	0.073675	1.158e-46	1.309e-44	1
hsa-miR-410	BCL11A	1	0.000189126	197	197	0.074445	6.832e-47	1.346e-44	1
hsa-miR-130b-5p	E2F3	0.685	87.4091	119	119	0.103899	1.249e-46	1.486e-44	1
hsa-miR-22-3p	TAX1BP3	1	0.000189126	186	186	0.078066	8.035e-47	1.495e-44	1
hsa-let-7c	ZFPM2	0.999	30.3054	150	150	0.069488	1.105e-46	1.658e-44	1
hsa-miR-16-5p	ZNF831	1	0.000189126	202	202	0.070091	8.376e-47	1.692e-44	1
hsa-miR-20a-3p	ZNF695	0.623	91.2019	103	103	0.112679	1.924e-46	1.982e-44	1
hsa-miR-31-5p	FOXN2	0.95	59.4113	309	309	0.099734	6.965e-47	2.152e-44	1
hsa-miR-511	PPARG	1	0.000189126	126	126	0.098787	1.941e-46	2.446e-44	1
hsa-miR-199a-5p	HOXA7	1	0.000189126	84	84	0.084072	2.939e-46	2.469e-44	1
hsa-miR-338-5p	GATA3	1	0.000189126	342	342	0.077941	7.432e-47	2.542e-44	1
hsa-miR-223-5p	ETS1	0.655	89.2349	147	147	0.087845	1.792e-46	2.634e-44	1
hsa-miR-186-5p	DEK	1	0.000189126	190	190	0.077242	1.397e-46	2.654e-44	1
hsa-miR-455-5p	KCMF1	0.61	92.7663	235	235	0.093984	1.214e-46	2.853e-44	1
hsa-miR-3674	DMRT2	0.993	43.8171	47	47	0.006422	6.206e-46	2.917e-44	1
hsa-miR-505-5p	E2F3	0.523	98.5776	119	119	0.117407	2.479e-46	2.95e-44	1
hsa-miR-411-3p	BACH2	0.54	97.0708	142	142	0.066235	2.358e-46	3.348e-44	1
hsa-miR-28-3p	ZNF462	0.872	71.4369	100	100	0.103909	3.481e-46	3.481e-44	1
hsa-miR-369-3p	BCL11A	0.55	96.4558	197	197	0.076162	1.859e-46	3.662e-44	1
hsa-miR-488-3p	EBF1	0.999	30.3054	232	232	0.084984	1.651e-46	3.83e-44	1
hsa-miR-136-5p	BACH2	0.943	61.1064	142	142	0.068944	3.143e-46	4.463e-44	1
hsa-miR-432-5p	TCF4	0.623	91.2019	104	104	0.081525	5.238e-46	5.448e-44	1
hsa-miR-585	EBF1	1	0.000189126	232	232	0.062747	2.374e-46	5.508e-44	1
hsa-miR-511	ZEB2	0.993	43.8171	312	312	0.073236	2.018e-46	6.296e-44	1
hsa-miR-548b-5p	E2F3	0.661	88.8822	119	119	0.072168	5.332e-46	6.345e-44	1
hsa-miR-590-3p	ANKRA2	1	0.000189126	205	205	0.081242	3.587e-46	7.353e-44	1
hsa-miR-3938	ZNF521	0.758	81.7461	143	143	0.043075	5.528e-46	7.905e-44	1
hsa-miR-376a-3p	BCL11A	0.896	68.143	197	197	0.064746	4.059e-46	7.996e-44	1
hsa-miR-485-3p	TSHZ2	0.604	93.1338	198	198	0.062569	4.678e-46	9.262e-44	1
hsa-miR-495	ETS1	0.975	52.9929	147	147	0.069599	6.942e-46	1.02e-43	1
hsa-miR-3616-5p	PLAGL1	0.636	90.4077	234	234	0.059214	4.439e-46	1.039e-43	1
hsa-miR-150-5p	IFI16	0.911	66.3066	113	113	0.098461	1.196e-45	1.351e-43	1
hsa-miR-3120-3p	BCL11A	1	0.000189126	197	197	0.0482	6.877e-46	1.355e-43	1
hsa-miR-485-3p	ZEB1	1	0.000189126	385	385	0.062641	3.916e-46	1.508e-43	1
hsa-miR-9-5p	TAF4B	0.997	38.6214	170	170	0.168809	9.14e-46	1.554e-43	1
hsa-miR-545-5p	GATA3	0.999	30.3054	342	342	0.062116	5.011e-46	1.714e-43	1
hsa-miR-126-5p	ERG	1	0.000189126	171	171	0.062379	1.02e-45	1.744e-43	1
hsa-miR-642a-5p	SMYD1	0.916	65.1724	116	116	0.084904	1.571e-45	1.822e-43	1
hsa-miR-28-5p	ZNF462	0.659	88.9968	100	100	0.09797	2.074e-45	2.074e-43	1
hsa-miR-101-3p	BCL11A	0.987	48	197	197	0.08907	1.058e-45	2.084e-43	1
hsa-miR-409-3p	TCF4	0.687	87.2815	104	104	0.074557	2.037e-45	2.118e-43	1
hsa-miR-548d-3p	E2F3	0.999	30.3054	119	119	0.115155	1.788e-45	2.128e-43	1
hsa-miR-22-3p	ZEB2	1	0.000189126	312	312	0.061948	7.81e-46	2.437e-43	1
hsa-miR-200a-3p	BNC2	0.93	63.2023	263	263	0.069958	9.663e-46	2.541e-43	1
hsa-miR-200b-3p	TSHZ3	0.967	55.6329	190	190	0.071476	1.44e-45	2.736e-43	1
hsa-miR-485-3p	SNAI2	0.817	76.801	66	66	0.08424	4.396e-45	2.901e-43	1
hsa-miR-199b-5p	TCF4	0.996	40.3642	104	104	0.072238	2.811e-45	2.923e-43	1
hsa-miR-377-5p	BACH2	0.997	38.6214	142	142	0.061954	2.107e-45	2.992e-43	1
hsa-miR-1	BCL11A	1	0.000189126	197	197	0.079423	1.646e-45	3.243e-43	1
hsa-miR-758	ETS1	1	0.000189126	147	147	0.067108	2.515e-45	3.697e-43	1
hsa-miR-411-3p	ZEB1	1	0.000189126	385	385	0.056607	1.066e-45	4.104e-43	1
hsa-miR-148b-3p	MEOX2	1	0.000189126	163	163	0.065279	2.531e-45	4.126e-43	1
hsa-miR-374b-5p	ANKRA2	1	0.000189126	205	205	0.069345	2.184e-45	4.477e-43	1
hsa-miR-539-5p	PITX2	1	0.000189126	44	44	0.101987	1.046e-44	4.602e-43	1
hsa-miR-1246	WWTR1	1	0.000189126	226	226	0.051359	2.226e-45	5.031e-43	1
hsa-miR-378a-3p	SMYD1	0.973	53.614	116	116	0.093193	4.5e-45	5.22e-43	1
hsa-let-7a-3p	EBF1	1	0.000189126	232	232	0.070765	2.553e-45	5.923e-43	1
hsa-miR-30e-5p	IRF4	1	0.000189126	86	86	0.103202	6.961e-45	5.986e-43	1
hsa-miR-361-5p	BCL11A	1	0.000189126	197	197	0.061637	3.062e-45	6.032e-43	1
hsa-miR-1258	BCL11A	0.91	66.4231	197	197	0.078276	3.48e-45	6.856e-43	1
hsa-miR-570-3p	MCM6	0.546	96.7032	139	139	0.085083	4.999e-45	6.949e-43	1
hsa-miR-30c-2-3p	OSR1	0.644	89.9181	113	113	0.069285	6.788e-45	7.67e-43	1
hsa-miR-18a-5p	CBX2	0.995	41.8528	159	159	0.152304	4.859e-45	7.726e-43	1
hsa-miR-323a-3p	TSHZ3	1	0.000189126	190	190	0.071524	4.095e-45	7.781e-43	1
hsa-miR-125b-2-3p	ZFPM2	1	0.000189126	150	150	0.072696	5.231e-45	7.846e-43	1
hsa-miR-411-5p	HIC1	0.853	73.2158	123	123	0.070286	6.985e-45	8.592e-43	1
hsa-miR-582-5p	CSRP2	0.865	72.1058	99	99	0.109721	9.595e-45	9.499e-43	1
hsa-miR-301a-3p	E2F2	1	0.000189126	68	68	0.12734	1.554e-44	1.057e-42	1
hsa-miR-1255a	BCL11A	1	0.000189126	197	197	0.07115	5.523e-45	1.088e-42	1
hsa-miR-34a-5p	BCL11A	1	0.000189126	197	197	0.063045	5.528e-45	1.089e-42	1
hsa-miR-2113	E2F8	1	0.000189126	103	103	0.039	1.161e-44	1.196e-42	1
hsa-miR-3926	EBF3	1	0.000189126	79	79	0.06255	1.743e-44	1.377e-42	1
hsa-miR-487b	BCL11A	0.925	63.8991	197	197	0.069485	7.343e-45	1.447e-42	1
hsa-miR-299-5p	BCL11A	0.991	45.6945	197	197	0.067826	7.868e-45	1.55e-42	1
hsa-miR-381	ZNF521	1	0.000189126	143	143	0.068757	1.314e-44	1.879e-42	1
hsa-miR-15a-5p	BCL11A	0.978	52.0323	197	197	0.074014	1.111e-44	2.189e-42	1
hsa-miR-577	YBX1	0.99	46.3194	204	204	0.232861	1.093e-44	2.23e-42	1
hsa-miR-130b-3p	ESR1	0.969	55.1026	267	267	0.087517	8.69e-45	2.32e-42	1
hsa-miR-337-3p	TCF4	1	0.000189126	104	104	0.07401	2.461e-44	2.559e-42	1
hsa-miR-182-5p	PHF21B	0.939	61.7971	161	161	0.084874	1.623e-44	2.613e-42	1
hsa-miR-218-2-3p	PRRX1	1	0.000189126	240	240	0.052176	1.109e-44	2.662e-42	1
hsa-miR-223-5p	DEK	0.786	79.1438	190	190	0.078874	1.517e-44	2.882e-42	1
hsa-miR-520a-3p	FOXN2	0.98	51.2666	309	309	0.096306	9.358e-45	2.892e-42	1
hsa-miR-369-3p	ZFPM2	1	0.000189126	150	150	0.072064	1.943e-44	2.914e-42	1
hsa-miR-19b-1-5p	ZNF695	0.999	30.3054	103	103	0.119893	2.9e-44	2.987e-42	1
hsa-miR-381	BCL11A	0.875	71.128	197	197	0.085364	1.655e-44	3.26e-42	1
hsa-miR-549	FOXC1	0.996	40.3642	406	406	0.059723	8.318e-45	3.377e-42	1
hsa-miR-29a-3p	L3MBTL4	0.966	55.8939	119	119	0.085152	2.889e-44	3.438e-42	1
hsa-miR-505-5p	ZNF462	1	0.000189126	100	100	0.106436	3.456e-44	3.456e-42	1
hsa-miR-127-5p	RUNX1T1	0.665	88.6347	123	123	0.069767	3.014e-44	3.707e-42	1
hsa-miR-337-3p	BCL11A	1	0.000189126	197	197	0.070192	1.917e-44	3.776e-42	1
hsa-miR-500a-3p	ANKRA2	0.698	85.7246	205	205	0.077724	1.965e-44	4.028e-42	1
hsa-miR-185-5p	BCL11A	0.994	42.9842	197	197	0.091616	2.067e-44	4.072e-42	1
hsa-miR-500b	ESR1	0.998	35.422	267	267	0.080598	1.55e-44	4.138e-42	1
hsa-miR-409-5p	ZEB2	1	0.000189126	312	312	0.055562	1.337e-44	4.171e-42	1
hsa-miR-20b-5p	ZNF367	1	0.000189126	93	93	0.09897	4.675e-44	4.348e-42	1
hsa-miR-26a-5p	OSR1	0.946	60.1907	113	113	0.075057	4.301e-44	4.86e-42	1
hsa-miR-940	E2F8	0.927	63.6439	103	103	0.088821	4.818e-44	4.963e-42	1
hsa-miR-106b-5p	ANKRA2	1	0.000189126	205	205	0.084012	2.455e-44	5.033e-42	1
hsa-miR-497-5p	ZNF831	0.883	69.6177	202	202	0.063174	2.554e-44	5.159e-42	1
hsa-miR-1264	BCL11A	0.998	35.422	197	197	0.005263	2.945e-44	5.802e-42	1
hsa-miR-584-5p	EBF1	0.906	66.9194	232	232	0.105812	2.755e-44	6.392e-42	1
hsa-miR-320a	BCL11A	0.723	84.0527	197	197	0.072682	3.286e-44	6.473e-42	1
hsa-miR-544b	LDB2	1	0.000189126	220	220	0.045958	2.964e-44	6.521e-42	1
hsa-miR-548y	FOXC1	0.98	51.2666	406	406	0.0528	1.991e-44	8.083e-42	1
hsa-miR-26a-1-3p	BCL11A	0.992	44.957	197	197	0.06082	4.173e-44	8.221e-42	1
hsa-miR-18b-5p	EZH2	0.924	64.0462	100	100	0.111633	8.434e-44	8.434e-42	1
hsa-miR-770-5p	PLAGL1	1	0.000189126	234	234	0.052276	3.614e-44	8.457e-42	1
hsa-miR-495	BCL11A	0.996	40.3642	197	197	0.079727	4.533e-44	8.93e-42	1
hsa-let-7f-5p	BCL11A	0.862	72.3931	197	197	0.080457	4.852e-44	9.558e-42	1
hsa-miR-548f	ZNF462	1	0.000189126	100	100	0.079985	1.06e-43	1.06e-41	1
hsa-miR-486-3p	BCL11A	0.662	88.8149	197	197	0.113083	6.275e-44	1.236e-41	1
hsa-miR-188-5p	YBX1	0.929	63.3578	204	204	0.08542	6.821e-44	1.391e-41	1
hsa-miR-197-3p	ZNF462	0.63	90.7672	100	100	0.102772	1.492e-43	1.492e-41	1
hsa-miR-542-3p	BCL11A	1	0.000189126	197	197	0.067932	7.784e-44	1.533e-41	1
hsa-miR-4326	BCL11A	0.999	30.3054	197	197	0.079584	8.128e-44	1.601e-41	1
hsa-miR-23a-3p	AFF3	0.998	35.422	256	256	0.064137	6.608e-44	1.692e-41	1
hsa-miR-301b	E2F2	1	0.000189126	68	68	0.105823	2.514e-43	1.71e-41	1
hsa-miR-625-5p	BCL11A	0.999	30.3054	197	197	0.071277	8.724e-44	1.719e-41	1
hsa-miR-369-5p	BCL11A	1	0.000189126	197	197	0.07276	1.255e-43	2.472e-41	1
hsa-miR-96-5p	EBF1	1	0.000189126	232	232	0.070774	1.116e-43	2.589e-41	1
hsa-miR-224-5p	TCF7L1	0.961	57.1053	132	132	0.173631	1.998e-43	2.637e-41	1
hsa-miR-889	ALX4	0.915	65.3245	102	102	0.075661	3.636e-43	3.709e-41	1
hsa-miR-129-5p	KCMF1	0.506	99.6185	235	235	0.105939	1.818e-43	4.272e-41	1
hsa-miR-26a-2-3p	BCL11A	0.992	44.957	197	197	0.070583	2.186e-43	4.306e-41	1
hsa-miR-302d-3p	ZCCHC24	0.577	94.8051	272	272	0.006182	1.858e-43	5.054e-41	1
hsa-miR-655	FLI1	1	0.000189126	273	273	0.057108	1.867e-43	5.097e-41	1
hsa-miR-493-5p	RUNX1T1	1	0.000189126	123	123	0.067197	4.244e-43	5.22e-41	1
hsa-miR-520g	BCL11A	1	0.000189126	197	197	0.038846	2.652e-43	5.224e-41	1
hsa-miR-34b-3p	ZBBX	0.863	72.3025	91	91	0.106978	5.806e-43	5.283e-41	1
hsa-miR-382-5p	EBF3	0.79	78.8491	79	79	0.079233	6.7e-43	5.293e-41	1
hsa-miR-214-5p	BCL11A	1	0.000189126	197	197	0.069838	2.722e-43	5.362e-41	1
hsa-miR-410	HOXA11	1	0.000189126	70	70	0.086084	7.704e-43	5.393e-41	1
hsa-miR-23b-3p	PLAGL1	1	0.000189126	234	234	0.060496	2.576e-43	6.028e-41	1
hsa-miR-186-5p	KCMF1	0.993	43.8171	235	235	0.087745	2.788e-43	6.552e-41	1
hsa-miR-96-5p	PHF21B	0.932	62.9156	161	161	0.086621	4.647e-43	7.482e-41	1
hsa-miR-148b-5p	ZEB1	1	0.000189126	385	385	0.064142	2e-43	7.7e-41	1
hsa-miR-96-5p	BCL11A	1	0.000189126	197	197	0.078929	4.429e-43	8.725e-41	1
hsa-miR-521	TCF7L1	0.502	99.8725	132	132	0.059795	7.065e-43	9.326e-41	1
hsa-miR-452-3p	TCF7L1	0.998	35.422	132	132	0.166906	7.316e-43	9.657e-41	1
hsa-miR-582-5p	RUNX3	0.868	71.8229	91	91	0.116429	1.153e-42	1.049e-40	1
hsa-miR-379-5p	TCF4	0.993	43.8171	104	104	0.070611	1.017e-42	1.058e-40	1
hsa-miR-30a-5p	MYBL2	0.999	30.3054	214	214	0.076442	5.239e-43	1.121e-40	1
hsa-miR-1911-3p	WWTR1	0.761	81.5593	226	226	0.008501	5.017e-43	1.134e-40	1
hsa-miR-98	ZCCHC24	0.888	69.0573	272	272	0.066751	4.216e-43	1.147e-40	1
hsa-miR-26b-5p	BCL11A	1	0.000189126	197	197	0.072239	5.973e-43	1.177e-40	1
hsa-miR-374b-5p	AFF4	1	0.000189126	244	244	0.066235	4.831e-43	1.179e-40	1
hsa-miR-183-3p	EBF1	0.998	35.422	232	232	0.065339	5.345e-43	1.24e-40	1
hsa-miR-137	NOTCH1	0.886	69.2789	182	182	0.107865	7.061e-43	1.285e-40	1
hsa-miR-432-3p	PLAGL1	0.648	89.6673	234	234	0.050332	5.703e-43	1.335e-40	1
hsa-miR-21-5p	BNC2	1	0.000189126	263	263	0.054434	5.699e-43	1.499e-40	1
hsa-miR-126-5p	BCL11A	1	0.000189126	197	197	0.058115	7.943e-43	1.565e-40	1
hsa-miR-106a-5p	FOXA1	1	0.000189126	479	479	0.080318	3.506e-43	1.679e-40	1
hsa-miR-934	ZNF521	0.97	54.8638	143	143	0.179108	1.252e-42	1.79e-40	1
hsa-miR-139-5p	ZEB2	0.854	73.1224	312	312	0.066492	5.886e-43	1.836e-40	1
hsa-miR-200c-3p	ZFPM2	1	0.000189126	150	150	0.072682	1.321e-42	1.981e-40	1
hsa-miR-214-3p	BCL11A	1	0.000189126	197	197	0.073465	1.149e-42	2.264e-40	1
hsa-miR-31-5p	TP63	0.944	60.5676	117	117	0.120035	2.022e-42	2.366e-40	1
hsa-miR-92a-3p	TRIP13	0.57	95.2304	120	120	0.090259	2.964e-42	3.557e-40	1
hsa-miR-449b-3p	ANKRD42	0.938	61.9367	174	174	0.125013	2.242e-42	3.901e-40	1
hsa-miR-145-3p	TSHZ3	1	0.000189126	190	190	0.067426	2.228e-42	4.233e-40	1
hsa-miR-301a-3p	E2F7	0.999	30.3054	67	67	0.120057	6.809e-42	4.562e-40	1
hsa-miR-33a-5p	NDN	0.998	35.422	282	282	0.074848	1.656e-42	4.67e-40	1
hsa-miR-16-1-3p	E2F8	0.694	86.0338	103	103	0.068664	4.753e-42	4.896e-40	1
hsa-miR-1264	TSHZ2	0.65	89.5413	198	198	0.003479	2.668e-42	5.283e-40	1
hsa-miR-127-5p	TBX5	0.927	63.6439	57	57	0.095563	9.927e-42	5.658e-40	1
hsa-miR-195-3p	BCL11A	0.998	35.422	197	197	0.074648	2.921e-42	5.754e-40	1
hsa-miR-9-5p	POLR2D	1	0.000189126	148	148	0.140153	3.902e-42	5.775e-40	1
hsa-miR-299-5p	PAX1	0.604	93.1338	54	54	0.084243	1.164e-41	6.286e-40	1
hsa-miR-33a-5p	XBP1	0.909	66.5461	243	243	0.082681	2.874e-42	6.984e-40	1
hsa-miR-182-5p	BCL11A	1	0.000189126	197	197	0.074597	3.555e-42	7.003e-40	1
hsa-miR-410	GLIS3	0.688	87.2117	112	112	0.066943	6.414e-42	7.184e-40	1
hsa-miR-885-5p	FOXN2	1	0.000189126	309	309	0.122801	2.354e-42	7.274e-40	1
hsa-miR-106b-5p	BNC2	0.998	35.422	263	263	0.081746	2.797e-42	7.356e-40	1
hsa-miR-585	BCL11A	0.533	97.9234	197	197	0.069895	3.993e-42	7.866e-40	1
hsa-miR-214-3p	OSR1	0.926	63.7746	113	113	0.075815	7.225e-42	8.164e-40	1
hsa-miR-200b-3p	ZFPM2	0.998	35.422	150	150	0.069266	5.679e-42	8.519e-40	1
hsa-miR-511	EBF1	0.757	81.8129	232	232	0.078192	3.921e-42	9.097e-40	1
hsa-miR-1261	AFF4	0.698	85.7246	244	244	0.002225	3.732e-42	9.106e-40	1
hsa-miR-379-3p	ZEB1	1	0.000189126	385	385	0.049693	2.43e-42	9.355e-40	1
hsa-miR-877-5p	YBX1	0.994	42.9842	204	204	0.099008	4.661e-42	9.508e-40	1
hsa-miR-892a	FLI1	0.539	97.1398	273	273	0.04456	3.503e-42	9.563e-40	1
hsa-miR-141-3p	GLI2	0.992	44.957	92	92	0.095563	1.045e-41	9.614e-40	1
hsa-miR-381	EN1	1	0.000189126	135	135	0.077611	8.223e-42	1.11e-39	1
hsa-miR-584-5p	OSR1	0.925	63.8991	113	113	0.117015	1.062e-41	1.2e-39	1
hsa-miR-200c-3p	OSR1	1	0.000189126	113	113	0.079366	1.207e-41	1.364e-39	1
hsa-miR-549	NKX3-2	1	0.000189126	70	70	0.05957	1.964e-41	1.375e-39	1
hsa-miR-29a-3p	TFEC	1	0.000189126	240	240	0.073693	5.886e-42	1.413e-39	1
hsa-miR-495	TSHZ3	1	0.000189126	190	190	0.075582	7.609e-42	1.446e-39	1
hsa-miR-3689b-5p	AFF4	0.784	79.2848	244	244	0.006488	6.066e-42	1.48e-39	1
hsa-miR-3920	BCL11A	1	0.000189126	197	197	0.094974	9.306e-42	1.833e-39	1
hsa-miR-27b-3p	CSRP2	1	0.000189126	99	99	0.073988	2.097e-41	2.076e-39	1
hsa-miR-223-3p	ZEB2	1	0.000189126	312	312	0.084348	6.827e-42	2.13e-39	1
hsa-miR-18a-3p	TCF7L1	0.998	35.422	132	132	0.150711	1.747e-41	2.306e-39	1
hsa-miR-302a-3p	TP63	0.997	38.6214	117	117	0.008612	2.073e-41	2.425e-39	1
hsa-miR-516a-5p	EZH2	0.943	61.1064	100	100	0.147996	2.768e-41	2.768e-39	1
hsa-miR-26b-3p	BCL11A	1	0.000189126	197	197	0.06819	1.409e-41	2.776e-39	1
hsa-miR-9-3p	ZNF462	1	0.000189126	100	100	0.161754	3.014e-41	3.014e-39	1
hsa-miR-130a-3p	FOSL1	0.947	60.0144	110	110	0.08664	2.76e-41	3.036e-39	1
hsa-miR-582-3p	NFIL3	1	0.000189126	136	136	0.101477	2.265e-41	3.08e-39	1
hsa-miR-18a-5p	PHF19	0.996	40.3642	76	76	0.17124	4.418e-41	3.358e-39	1
hsa-miR-106a-5p	E2F3	0.963	56.6374	119	119	0.106188	2.865e-41	3.409e-39	1
hsa-miR-19b-3p	TBX19	0.995	41.8528	114	114	0.108042	3.065e-41	3.494e-39	1
hsa-miR-494	BCL11A	0.943	61.1064	197	197	0.074308	1.82e-41	3.585e-39	1
hsa-miR-487b	SNAI2	0.999	30.3054	66	66	0.090003	5.535e-41	3.653e-39	1
hsa-miR-196b-5p	CSRP2	0.621	91.328	99	99	0.115394	3.774e-41	3.736e-39	1
hsa-miR-625-3p	BCL11A	1	0.000189126	197	197	0.074152	1.992e-41	3.924e-39	1
hsa-miR-432-5p	ZNF521	1	0.000189126	143	143	0.071213	3.051e-41	4.363e-39	1
hsa-miR-590-3p	APBB2	0.972	53.8807	86	86	0.090161	5.444e-41	4.682e-39	1
hsa-miR-143-3p	HIC1	0.993	43.8171	123	123	0.068999	3.831e-41	4.712e-39	1
hsa-miR-150-3p	TOX	0.893	68.509	51	51	0.131841	9.488e-41	4.839e-39	1
hsa-miR-448	BCL11A	0.977	52.3486	197	197	0.034691	2.533e-41	4.99e-39	1
hsa-miR-4320	WWTR1	1	0.000189126	226	226	0.006451	2.333e-41	5.273e-39	1
hsa-miR-889	RUNX2	0.897	68.0241	81	81	0.093133	6.71e-41	5.435e-39	1
hsa-miR-323a-3p	BCL11A	1	0.000189126	197	197	0.070564	2.828e-41	5.571e-39	1
hsa-miR-200c-3p	BACH2	1	0.000189126	142	142	0.076256	3.993e-41	5.67e-39	1
hsa-miR-18a-3p	CBX2	0.739	83.0112	159	159	0.132691	3.666e-41	5.829e-39	1
hsa-miR-944	KLF15	0.963	56.6374	104	104	0.082304	5.666e-41	5.893e-39	1
hsa-miR-146b-5p	PLAGL1	0.547	96.6409	234	234	0.07634	2.621e-41	6.133e-39	1
hsa-miR-130b-5p	ESR1	0.705	85.2652	267	267	0.076842	2.3e-41	6.141e-39	1
hsa-miR-590-5p	ZFYVE16	0.996	40.3642	153	153	0.092668	4.126e-41	6.313e-39	1
hsa-miR-125b-2-3p	ZEB2	1	0.000189126	312	312	0.063052	2.03e-41	6.334e-39	1
hsa-miR-96-5p	BACH2	0.998	35.422	142	142	0.075748	4.599e-41	6.531e-39	1
hsa-miR-200c-3p	ETS1	1	0.000189126	147	147	0.07531	4.603e-41	6.766e-39	1
hsa-miR-381	TCF4	1	0.000189126	104	104	0.072016	6.657e-41	6.923e-39	1
hsa-miR-130b-5p	TAF4B	0.543	96.8889	170	170	0.098037	4.136e-41	7.031e-39	1
hsa-let-7a-2-3p	NFIL3	1	0.000189126	136	136	0.087583	5.308e-41	7.219e-39	1
hsa-miR-1283	KLF11	0.862	72.3931	124	124	0.035619	6.173e-41	7.655e-39	1
hsa-miR-1912	BCL11A	0.805	77.7236	197	197	0.046186	4.091e-41	8.059e-39	1
hsa-miR-127-5p	FOXQ1	0.81	77.3217	64	64	0.081329	1.277e-40	8.173e-39	1
hsa-miR-200a-3p	HOXA4	0.848	73.6493	72	72	0.087168	1.183e-40	8.518e-39	1
hsa-miR-144-5p	BCL11A	0.921	64.4653	197	197	0.095099	4.493e-41	8.851e-39	1
hsa-miR-18b-5p	MKL2	0.861	72.4825	223	223	0.091726	4.077e-41	9.092e-39	1
hsa-miR-493-3p	PLAGL1	1	0.000189126	234	234	0.064571	4.046e-41	9.468e-39	1
hsa-miR-409-3p	CREB3L1	1	0.000189126	113	113	0.179266	9.697e-41	1.096e-38	1
hsa-miR-2116-3p	ZNF462	0.655	89.2349	100	100	0.088675	1.107e-40	1.107e-38	1
hsa-miR-3678-3p	FOXC1	1	0.000189126	406	406	0.048762	2.798e-41	1.136e-38	1
hsa-miR-891a	BCL11A	1	0.000189126	197	197	0.098676	5.792e-41	1.141e-38	1
hsa-miR-494	BACH2	0.999	30.3054	142	142	0.068466	8.281e-41	1.176e-38	1
hsa-miR-665	TP63	0.97	54.8638	117	117	0.068701	1.008e-40	1.179e-38	1
hsa-miR-18b-5p	CBX2	0.982	50.4983	159	159	0.112237	8.104e-41	1.289e-38	1
hsa-miR-3674	BACH2	0.819	76.642	142	142	0.004174	9.274e-41	1.317e-38	1
hsa-miR-106b-5p	E2F3	1	0.000189126	119	119	0.111469	1.218e-40	1.449e-38	1
hsa-miR-432-5p	BCL11A	0.9	67.6685	197	197	0.081712	8.275e-41	1.63e-38	1
hsa-miR-548j	PPARG	1	0.000189126	126	126	0.063561	1.337e-40	1.685e-38	1
hsa-miR-1245a	ZEB2	0.945	60.3862	312	312	0.046061	5.411e-41	1.688e-38	1
hsa-miR-1283	TCF7L1	1	0.000189126	132	132	0.052306	1.342e-40	1.771e-38	1
hsa-miR-3936	EBF1	0.99	46.3194	232	232	0.041454	8.1e-41	1.879e-38	1
hsa-miR-548d-3p	YBX1	0.997	38.6214	204	204	0.112449	9.252e-41	1.887e-38	1
hsa-miR-3146	BCL11A	1	0.000189126	197	197	0.066414	1.005e-40	1.98e-38	1
hsa-miR-369-5p	RUNX1T1	1	0.000189126	123	123	0.06914	1.819e-40	2.237e-38	1
hsa-miR-219-5p	ZEB1	1	0.000189126	385	385	0.0609	5.832e-41	2.245e-38	1
hsa-miR-944	BACH2	1	0.000189126	142	142	0.082809	1.913e-40	2.716e-38	1
hsa-miR-411-5p	ZNF521	1	0.000189126	143	143	0.066609	2.143e-40	3.064e-38	1
hsa-miR-411-3p	BCL11A	1	0.000189126	197	197	0.076017	1.806e-40	3.558e-38	1
hsa-miR-889	BCL11A	0.529	98.195	197	197	0.068737	1.817e-40	3.579e-38	1
hsa-miR-487b	RUNX2	1	0.000189126	81	81	0.08819	4.535e-40	3.673e-38	1
hsa-miR-101-3p	TAL1	1	0.000189126	72	72	0.078211	5.156e-40	3.712e-38	1
hsa-miR-379-3p	ZEB2	0.999	30.3054	312	312	0.046108	1.286e-40	4.012e-38	1
hsa-miR-518c-3p	BCL11A	1	0.000189126	197	197	0.033388	2.291e-40	4.513e-38	1
hsa-miR-204-5p	DMRT2	1	0.000189126	47	47	0.134017	1.055e-39	4.959e-38	1
hsa-miR-139-5p	TFEC	1	0.000189126	240	240	0.066024	2.357e-40	5.657e-38	1
hsa-miR-590-3p	ZCCHC24	1	0.000189126	272	272	0.079	2.165e-40	5.889e-38	1
hsa-miR-520h	BCL11A	1	0.000189126	197	197	0.034047	3.23e-40	6.363e-38	1
hsa-miR-18a-5p	TCF7L1	0.958	57.7506	132	132	0.145699	4.957e-40	6.543e-38	1
hsa-miR-27a-5p	SPI1	1	0.000189126	281	281	0.064571	2.336e-40	6.564e-38	1
hsa-miR-584-5p	ZNF521	0.909	66.5461	143	143	0.124038	4.932e-40	7.053e-38	1
hsa-miR-3200-5p	BCL11A	1	0.000189126	197	197	0.065912	3.656e-40	7.202e-38	1
hsa-miR-323a-3p	SNAI2	0.997	38.6214	66	66	0.076971	1.126e-39	7.432e-38	1
hsa-miR-329	TP63	1	0.000189126	117	117	0.06003	6.4e-40	7.488e-38	1
hsa-miR-17-5p	TCF7L1	0.991	45.6945	132	132	0.126801	5.718e-40	7.548e-38	1
hsa-miR-339-3p	BCL11A	0.656	89.1744	197	197	0.08532	3.892e-40	7.667e-38	1
hsa-miR-495	RUNX1T1	1	0.000189126	123	123	0.0711	6.536e-40	8.039e-38	1
hsa-miR-30d-5p	BCL11A	0.975	52.9929	197	197	0.084397	4.239e-40	8.351e-38	1
hsa-let-7d-5p	HMGA1	0.98	51.2666	79	79	0.091561	1.164e-39	9.196e-38	1
hsa-miR-17-5p	SCML2	0.997	38.6214	82	82	0.125615	1.123e-39	9.209e-38	1
hsa-miR-654-3p	BACH2	0.664	88.6897	142	142	0.07073	6.674e-40	9.477e-38	1
hsa-let-7a-2-3p	ETV5	0.999	30.3054	128	128	0.094059	9.438e-40	1.208e-37	1
hsa-miR-138-5p	CSRP2	0.794	78.5571	99	99	0.129382	1.291e-39	1.278e-37	1
hsa-miR-499a-5p	EBF1	1	0.000189126	232	232	0.058888	5.658e-40	1.313e-37	1
hsa-miR-130b-3p	AFF3	0.941	61.4501	256	256	0.082443	5.677e-40	1.453e-37	1
hsa-miR-19b-3p	HMGA1	0.98	51.2666	79	79	0.11485	1.877e-39	1.483e-37	1
hsa-miR-539-5p	EYA4	0.568	95.3528	41	41	0.101897	3.674e-39	1.506e-37	1
hsa-miR-302d-3p	APC	0.581	94.5622	135	135	0.007037	1.149e-39	1.551e-37	1
hsa-miR-105-5p	POLR2D	1	0.000189126	148	148	0.18224	1.193e-39	1.766e-37	1
hsa-miR-338-3p	FOXA1	0.99	46.3194	479	479	0.084527	3.724e-40	1.784e-37	1
hsa-miR-589-3p	GATA3	0.999	30.3054	342	342	0.071484	5.262e-40	1.8e-37	1
hsa-miR-127-5p	BCL11A	1	0.000189126	197	197	0.064322	1.033e-39	2.035e-37	1
hsa-miR-548x-3p	KCMF1	0.829	75.8779	235	235	0.040265	9.441e-40	2.219e-37	1
hsa-miR-199b-3p	CSRP2	1	0.000189126	99	99	0.07369	2.322e-39	2.299e-37	1
hsa-miR-199a-3p	CSRP2	1	0.000189126	99	99	0.073636	2.488e-39	2.463e-37	1
hsa-miR-105-5p	PLAGL1	0.996	40.3642	234	234	0.188372	1.114e-39	2.607e-37	1
hsa-miR-1205	RBL1	0.783	79.3507	134	134	0.003087	2.035e-39	2.727e-37	1
hsa-miR-142-5p	FOXA1	0.999	30.3054	479	479	0.077783	5.698e-40	2.729e-37	1
hsa-miR-130a-3p	RUNX3	1	0.000189126	91	91	0.090898	3.128e-39	2.846e-37	1
hsa-miR-3156-5p	MATR3	0.731	83.5317	159	159	0.023783	1.824e-39	2.9e-37	1
hsa-miR-599	ETS1	0.731	83.5317	147	147	0.007884	2.003e-39	2.944e-37	1
hsa-miR-33a-5p	EBF1	0.999	30.3054	232	232	0.070009	1.288e-39	2.988e-37	1
hsa-miR-451a	OSR1	1	0.000189126	113	113	0.095053	2.713e-39	3.066e-37	1
hsa-miR-142-5p	TOX	0.953	58.8222	51	51	0.132704	6.026e-39	3.073e-37	1
hsa-miR-518f-3p	BCL11A	0.786	79.1438	197	197	0.031022	1.616e-39	3.184e-37	1
hsa-miR-515-3p	BCL11A	0.997	38.6214	197	197	0.030165	1.624e-39	3.199e-37	1
hsa-miR-342-5p	KDM4B	0.659	88.9968	148	148	0.078361	2.286e-39	3.383e-37	1
hsa-miR-1243	EBF1	1	0.000189126	232	232	0.051328	1.48e-39	3.434e-37	1
hsa-miR-221-5p	IRF8	1	0.000189126	126	126	0.070062	2.82e-39	3.553e-37	1
hsa-miR-19a-3p	TBX19	0.995	41.8528	114	114	0.113973	3.901e-39	4.447e-37	1
hsa-miR-98	KCMF1	0.951	59.2129	235	235	0.076797	2.076e-39	4.879e-37	1
hsa-miR-27a-3p	NFIL3	1	0.000189126	136	136	0.087352	3.752e-39	5.103e-37	1
hsa-miR-508-3p	BCL11A	1	0.000189126	197	197	0.102643	2.766e-39	5.449e-37	1
hsa-miR-19a-3p	E2F8	1	0.000189126	103	103	0.117038	5.448e-39	5.611e-37	1
hsa-miR-16-5p	RUNX1T1	0.996	40.3642	123	123	0.073703	4.816e-39	5.924e-37	1
hsa-miR-410	TCF4	0.991	45.6945	104	104	0.078062	5.72e-39	5.949e-37	1
hsa-miR-3662	ATAD2	0.712	84.7982	63	63	0.090658	9.704e-39	6.114e-37	1
hsa-miR-3614-3p	BCL11A	0.936	62.2593	197	197	0.093824	3.172e-39	6.249e-37	1
hsa-miR-130a-5p	ZNF462	0.939	61.7971	100	100	0.091889	6.587e-39	6.587e-37	1
hsa-miR-323b-3p	BCL11A	0.997	38.6214	197	197	0.069256	3.594e-39	7.08e-37	1
hsa-miR-155-5p	TOX	0.936	62.2593	51	51	0.138761	1.504e-38	7.67e-37	1
hsa-miR-20a-5p	TCF7L1	0.995	41.8528	132	132	0.119676	5.927e-39	7.824e-37	1
hsa-miR-542-3p	BNC2	1	0.000189126	263	263	0.062974	3.082e-39	8.106e-37	1
hsa-miR-1	FLI1	0.55	96.4558	273	273	0.067559	3.214e-39	8.774e-37	1
hsa-miR-544a	POU4F2	0.997	38.6214	381	381	0.117817	2.352e-39	8.961e-37	1
hsa-miR-130b-3p	ZBTB4	1	0.000189126	185	185	0.098467	5.237e-39	9.688e-37	1
hsa-miR-154-3p	ALX4	0.532	97.9896	102	102	0.07801	9.61e-39	9.802e-37	1
hsa-miR-369-3p	HOXA11	1	0.000189126	70	70	0.071371	1.611e-38	1.128e-36	1
hsa-miR-548a-3p	ZNF462	0.971	54.5782	100	100	0.022906	1.13e-38	1.13e-36	1
hsa-miR-632	BCL11A	0.619	91.4666	197	197	0.064101	5.93e-39	1.168e-36	1
hsa-miR-21-5p	ZFPM2	1	0.000189126	150	150	0.057946	7.817e-39	1.173e-36	1
hsa-miR-656	ZEB1	1	0.000189126	385	385	0.047694	3.093e-39	1.191e-36	1
hsa-miR-29b-3p	EBF1	0.999	30.3054	232	232	0.066351	5.138e-39	1.192e-36	1
hsa-miR-3607-3p	BCL11A	1	0.000189126	197	197	0.072653	6.303e-39	1.242e-36	1
hsa-miR-3927	NFIL3	0.761	81.5593	136	136	0.047642	9.616e-39	1.308e-36	1
hsa-miR-146a-5p	TOX	0.995	41.8528	51	51	0.119209	2.688e-38	1.371e-36	1
hsa-miR-500b	AFF3	0.55	96.4558	256	256	0.074134	5.891e-39	1.508e-36	1
hsa-miR-514a-3p	ZNF831	1	0.000189126	202	202	0.087946	8.259e-39	1.668e-36	1
hsa-miR-370	HOXC8	0.86	72.5746	32	32	0.137913	5.464e-38	1.748e-36	1
hsa-miR-369-3p	BACH2	1	0.000189126	142	142	0.069553	1.26e-38	1.789e-36	1
hsa-miR-135b-3p	RCAN1	0.916	65.1724	96	96	0.18754	2.018e-38	1.937e-36	1
hsa-miR-518a-5p	FOXN2	0.981	50.9165	309	309	0.038835	6.352e-39	1.963e-36	1
hsa-miR-9-5p	TCF7L1	0.873	71.3281	132	132	0.169919	1.647e-38	2.174e-36	1
hsa-miR-18b-5p	ESR1	0.979	51.6176	267	267	0.098157	8.236e-39	2.199e-36	1
hsa-miR-424-3p	OSR1	1	0.000189126	113	113	0.067175	1.947e-38	2.2e-36	1
hsa-miR-138-5p	EZH2	1	0.000189126	100	100	0.109319	2.275e-38	2.275e-36	1
hsa-miR-155-5p	NR1H3	0.888	69.0573	56	56	0.165243	4.267e-38	2.39e-36	1
hsa-miR-138-5p	E2F3	0.968	55.3873	119	119	0.118534	2.023e-38	2.407e-36	1
hsa-miR-942	ZNF462	1	0.000189126	100	100	0.097576	2.413e-38	2.413e-36	1
hsa-miR-200a-3p	ERG	0.732	83.474	171	171	0.072356	1.429e-38	2.444e-36	1
hsa-miR-33a-5p	AFF3	0.988	47.4918	256	256	0.079576	9.786e-39	2.505e-36	1
hsa-miR-141-3p	ZFPM2	1	0.000189126	150	150	0.083398	1.734e-38	2.601e-36	1
hsa-miR-140-5p	CSRP2	0.539	97.1398	99	99	0.095926	2.692e-38	2.665e-36	1
hsa-miR-934	SMYD1	0.957	57.9431	116	116	0.228642	2.411e-38	2.797e-36	1
hsa-miR-122-5p	BCL11A	0.901	67.5479	197	197	0.006243	1.488e-38	2.931e-36	1
hsa-miR-548u	NRBF2	0.631	90.7041	129	129	0.003679	2.324e-38	2.998e-36	1
hsa-miR-656	HOXA11	0.851	73.4023	70	70	0.058903	4.33e-38	3.031e-36	1
hsa-miR-199a-5p	OSR1	0.939	61.7971	113	113	0.073908	2.683e-38	3.032e-36	1
hsa-miR-31-5p	ZNF532	1	0.000189126	99	99	0.102962	3.316e-38	3.283e-36	1
hsa-miR-3927	PLAGL1	1	0.000189126	234	234	0.048043	1.408e-38	3.295e-36	1
hsa-miR-323a-3p	BACH2	0.58	94.625	142	142	0.069398	2.805e-38	3.983e-36	1
hsa-miR-27a-3p	CSRP2	1	0.000189126	99	99	0.079693	4.232e-38	4.19e-36	1
hsa-miR-511	ST18	0.564	95.5903	70	70	0.097733	6.175e-38	4.323e-36	1
hsa-miR-548s	YBX1	1	0.000189126	204	204	0.083197	2.136e-38	4.357e-36	1
hsa-miR-532-3p	ZNF695	0.846	73.8342	103	103	0.101288	4.24e-38	4.367e-36	1
hsa-miR-152	BACH2	0.825	76.1828	142	142	0.060797	3.158e-38	4.484e-36	1
hsa-miR-34c-5p	KLF15	1	0.000189126	104	104	0.101192	4.739e-38	4.929e-36	1
hsa-miR-409-3p	HOXA4	0.961	57.1053	72	72	0.08122	7.258e-38	5.226e-36	1
hsa-miR-218-5p	RUNX1T1	1	0.000189126	123	123	0.065886	4.26e-38	5.24e-36	1
hsa-miR-224-5p	BARX1	0.993	43.8171	71	71	0.173864	7.574e-38	5.378e-36	1
hsa-miR-151a-3p	ZNF706	0.847	73.7459	79	79	0.111869	7.155e-38	5.652e-36	1
hsa-miR-125b-2-3p	SNAI2	1	0.000189126	66	66	0.092624	8.677e-38	5.727e-36	1
hsa-miR-501-5p	ESR1	0.538	97.2028	267	267	0.080704	2.193e-38	5.855e-36	1
hsa-miR-10a-5p	HOXA7	1	0.000189126	84	84	0.120517	7.465e-38	6.271e-36	1
hsa-miR-636	DEK	0.835	74.7959	190	190	0.065193	3.473e-38	6.599e-36	1
hsa-miR-590-3p	MKL2	0.998	35.422	223	223	0.076895	3.438e-38	7.667e-36	1
hsa-miR-299-3p	KLF15	0.992	44.957	104	104	0.060582	8.147e-38	8.473e-36	1
hsa-miR-541-3p	PRDM6	1	0.000189126	48	48	0.081241	1.833e-37	8.798e-36	1
hsa-miR-889	ETS1	1	0.000189126	147	147	0.064914	6.136e-38	9.02e-36	1
hsa-miR-20a-5p	SCML2	0.943	61.1064	82	82	0.113052	1.111e-37	9.11e-36	1
hsa-miR-382-5p	HAND2	0.962	56.8946	47	47	0.095991	1.956e-37	9.193e-36	1
hsa-miR-324-5p	EBF1	0.985	48.8707	232	232	0.07334	3.965e-38	9.199e-36	1
hsa-miR-155-5p	ST18	0.922	64.3227	70	70	0.101552	1.333e-37	9.331e-36	1
hsa-miR-421	ANKRA2	0.791	78.7776	205	205	0.069115	4.688e-38	9.61e-36	1
hsa-miR-19b-3p	RUNX3	0.924	64.0462	91	91	0.109658	1.16e-37	1.056e-35	1
hsa-miR-665	BCL11A	0.641	90.1032	197	197	0.07265	5.39e-38	1.062e-35	1
hsa-miR-30b-5p	BCL11A	1	0.000189126	197	197	0.091336	5.537e-38	1.091e-35	1
hsa-miR-655	SNAI2	1	0.000189126	66	66	0.075343	1.757e-37	1.16e-35	1
hsa-let-7d-5p	ANKRA2	1	0.000189126	205	205	0.070511	5.979e-38	1.226e-35	1
hsa-miR-206	KLF15	1	0.000189126	104	104	0.147381	1.276e-37	1.327e-35	1
hsa-miR-21-5p	BCL11A	1	0.000189126	197	197	0.066314	8.136e-38	1.603e-35	1
hsa-miR-454-3p	ZCCHC24	1	0.000189126	272	272	0.073559	5.973e-38	1.625e-35	1
hsa-miR-519a-5p	ZBED2	0.972	53.8807	83	83	0.149638	1.964e-37	1.63e-35	1
hsa-miR-9-5p	YBX1	0.971	54.5782	204	204	0.176963	8.375e-38	1.709e-35	1
hsa-miR-150-5p	BACH2	0.713	84.7343	142	142	0.099467	1.252e-37	1.778e-35	1
hsa-miR-3681-5p	EBF1	0.541	97.0061	232	232	0.051889	7.783e-38	1.806e-35	1
hsa-miR-744-3p	E2F3	0.731	83.5317	119	119	0.084796	1.544e-37	1.837e-35	1
hsa-miR-1245a	LDB2	1	0.000189126	220	220	0.051674	9.258e-38	2.037e-35	1
hsa-miR-377-3p	TOX2	1	0.000189126	47	47	0.080601	4.457e-37	2.095e-35	1
hsa-miR-138-5p	FOSL1	0.561	95.7704	110	110	0.103398	2.028e-37	2.231e-35	1
hsa-miR-18b-5p	KCMF1	0.971	54.5782	235	235	0.108341	1.008e-37	2.369e-35	1
hsa-miR-1254	POLR2D	0.864	72.2049	148	148	0.069686	1.649e-37	2.441e-35	1
hsa-miR-548b-3p	YBX1	1	0.000189126	204	204	0.107874	1.197e-37	2.442e-35	1
hsa-miR-145-5p	EBF3	0.999	30.3054	79	79	0.075113	3.144e-37	2.484e-35	1
hsa-miR-584-5p	ID4	0.931	63.0711	58	58	0.146646	4.427e-37	2.568e-35	1
hsa-miR-3658	EYA4	1	0.000189126	41	41	0.016701	7.086e-37	2.905e-35	1
hsa-miR-181a-2-3p	KCMF1	1	0.000189126	235	235	0.085893	1.34e-37	3.149e-35	1
hsa-miR-214-5p	ZNF521	0.615	91.7603	143	143	0.067555	2.505e-37	3.582e-35	1
hsa-miR-496	RUNX2	1	0.000189126	81	81	0.090889	4.432e-37	3.59e-35	1
hsa-miR-495	GLIS3	0.993	43.8171	112	112	0.068605	3.238e-37	3.627e-35	1
hsa-miR-98	HMGA1	1	0.000189126	79	79	0.089691	4.601e-37	3.635e-35	1
hsa-miR-455-5p	ZNF695	1	0.000189126	103	103	0.096614	3.541e-37	3.647e-35	1
hsa-let-7c	DMRT2	1	0.000189126	47	47	0.117602	8.099e-37	3.807e-35	1
hsa-miR-656	TSHZ3	0.702	85.4732	190	190	0.054033	2.033e-37	3.863e-35	1
hsa-miR-548q	EBF1	1	0.000189126	232	232	0.056912	1.763e-37	4.09e-35	1
hsa-miR-522-3p	NOTCH1	1	0.000189126	182	182	0.047162	2.295e-37	4.177e-35	1
hsa-miR-934	SRF	0.997	38.6214	78	78	0.203027	5.549e-37	4.328e-35	1
hsa-miR-200b-3p	FLI1	0.998	35.422	273	273	0.062693	1.618e-37	4.417e-35	1
hsa-miR-154-5p	ZEB2	0.603	93.1973	312	312	0.052695	1.532e-37	4.78e-35	1
hsa-miR-582-5p	PPARA	1	0.000189126	167	167	0.108696	2.89e-37	4.826e-35	1
hsa-miR-93-5p	ATAD2	1	0.000189126	63	63	0.100091	7.857e-37	4.95e-35	1
hsa-miR-584-5p	SOX8	0.85	73.4806	57	57	0.208281	9.609e-37	5.477e-35	1
hsa-miR-22-3p	SNAI1	0.85	73.4806	96	96	0.073485	5.858e-37	5.624e-35	1
hsa-miR-214-3p	SALL1	1	0.000189126	76	76	0.078498	7.633e-37	5.801e-35	1
hsa-miR-454-3p	MEOX2	1	0.000189126	163	163	0.075247	3.641e-37	5.935e-35	1
hsa-miR-139-5p	ZEB1	0.998	35.422	385	385	0.067344	1.57e-37	6.044e-35	1
hsa-miR-372	BCL11A	1	0.000189126	197	197	0.077214	3.185e-37	6.274e-35	1
hsa-miR-373-3p	BCL11A	1	0.000189126	197	197	0.059996	3.631e-37	7.153e-35	1
hsa-miR-889	BHLHE22	1	0.000189126	61	61	0.072413	1.201e-36	7.326e-35	1
hsa-miR-18b-5p	PHF19	0.996	40.3642	76	76	0.130403	9.717e-37	7.385e-35	1
hsa-miR-29c-3p	MYBL2	1	0.000189126	214	214	0.075033	3.545e-37	7.586e-35	1
hsa-miR-337-5p	BCL11A	1	0.000189126	197	197	0.067117	4.017e-37	7.913e-35	1
hsa-miR-377-3p	TP63	1	0.000189126	117	117	0.076232	6.795e-37	7.95e-35	1
hsa-miR-495	BHLHE22	1	0.000189126	61	61	0.083984	1.313e-36	8.009e-35	1
hsa-miR-590-5p	BTG2	1	0.000189126	133	133	0.098417	6.306e-37	8.387e-35	1
hsa-miR-223-5p	EBF1	0.876	71.0221	232	232	0.077649	3.733e-37	8.661e-35	1
hsa-miR-501-5p	EZH2	0.895	68.2732	100	100	0.091049	1.093e-36	1.093e-34	1
hsa-miR-934	TFEC	0.671	88.277	240	240	0.160097	4.651e-37	1.116e-34	1
hsa-miR-181a-2-3p	BACH2	0.892	68.638	142	142	0.081236	7.994e-37	1.135e-34	1
hsa-miR-378a-5p	FOXN2	0.998	35.422	309	309	0.078259	3.811e-37	1.178e-34	1
hsa-miR-337-3p	ZNF365	1	0.000189126	52	52	0.149227	2.301e-36	1.197e-34	1
hsa-miR-500a-3p	E2F3	1	0.000189126	119	119	0.097337	1.012e-36	1.204e-34	1
hsa-miR-15b-5p	ZNF367	1	0.000189126	93	93	0.097134	1.322e-36	1.229e-34	1
hsa-miR-204-5p	BHLHE22	0.992	44.957	61	61	0.100376	2.07e-36	1.263e-34	1
hsa-miR-130b-3p	E2F7	0.997	38.6214	67	67	0.12178	1.941e-36	1.3e-34	1
hsa-miR-3156-5p	ATRX	0.734	83.3442	134	134	0.026418	1.052e-36	1.41e-34	1
hsa-miR-452-5p	E2F3	0.963	56.6374	119	119	0.102416	1.224e-36	1.457e-34	1
hsa-miR-3121-3p	NEUROD6	1	0.000189126	232	232	0.061579	6.531e-37	1.515e-34	1
hsa-miR-148b-3p	LDB2	1	0.000189126	220	220	0.0573	7.357e-37	1.619e-34	1
hsa-miR-191-5p	BCL11A	0.997	38.6214	197	197	0.07499	8.562e-37	1.687e-34	1
hsa-miR-3929	BCL11A	0.999	30.3054	197	197	0.059034	9.46e-37	1.864e-34	1
hsa-miR-1271-5p	TAF4B	0.952	59.0083	170	170	0.060801	1.122e-36	1.907e-34	1
hsa-let-7a-2-3p	ZEB1	1	0.000189126	385	385	0.07318	4.983e-37	1.918e-34	1
hsa-miR-548a-3p	ZC3H12C	0.509	99.4411	98	98	0.019666	1.963e-36	1.924e-34	1
hsa-miR-3692-5p	EBF1	0.917	65.0227	232	232	0.018118	8.397e-37	1.948e-34	1
hsa-miR-199b-5p	ETS1	1	0.000189126	147	147	0.059608	1.416e-36	2.082e-34	1
hsa-miR-3664-5p	E2F3	0.557	96.018	119	119	0.085224	1.763e-36	2.098e-34	1
hsa-let-7d-5p	EZH2	0.654	89.2887	100	100	0.082173	2.137e-36	2.137e-34	1
hsa-miR-141-3p	BACH2	0.974	53.3216	142	142	0.083391	1.671e-36	2.373e-34	1
hsa-miR-532-3p	ZNF462	0.999	30.3054	100	100	0.105923	2.428e-36	2.428e-34	1
hsa-miR-584-5p	FLI1	0.564	95.5903	273	273	0.109615	9.09e-37	2.482e-34	1
hsa-miR-4315	AFF4	0.62	91.3991	244	244	0.002164	1.237e-36	3.018e-34	1
hsa-miR-3145-3p	BCL11A	1	0.000189126	197	197	0.055283	1.587e-36	3.126e-34	1
hsa-miR-30e-5p	TAF4B	0.731	83.5317	170	170	0.073773	1.956e-36	3.325e-34	1
hsa-miR-138-5p	TCF7L1	0.584	94.3722	132	132	0.137837	2.628e-36	3.469e-34	1
hsa-miR-193a-5p	BCL11A	0.998	35.422	197	197	0.073239	1.847e-36	3.639e-34	1
hsa-miR-199a-5p	BCL11A	0.535	97.3872	197	197	0.067748	1.863e-36	3.67e-34	1
hsa-miR-551b-5p	DMRT2	1	0.000189126	47	47	0.049761	7.873e-36	3.7e-34	1
hsa-miR-200b-3p	ETS1	1	0.000189126	147	147	0.067789	2.667e-36	3.92e-34	1
hsa-miR-548f	HDAC2	0.803	77.866	124	124	0.07694	3.172e-36	3.933e-34	1
hsa-miR-129-5p	PHF21B	1	0.000189126	161	161	0.126964	2.449e-36	3.943e-34	1
hsa-miR-380-5p	RUNX1T1	0.975	52.9929	123	123	0.05629	3.346e-36	4.116e-34	1
hsa-miR-23b-3p	NKX3-2	1	0.000189126	70	70	0.077362	5.895e-36	4.127e-34	1
hsa-miR-656	BCL11A	0.504	99.746	197	197	0.059841	2.484e-36	4.893e-34	1
hsa-miR-15a-5p	ZNF831	1	0.000189126	202	202	0.057231	2.477e-36	5.004e-34	1
hsa-miR-335-3p	MEOX2	1	0.000189126	163	163	0.091474	3.171e-36	5.169e-34	1
hsa-miR-493-5p	BACH2	1	0.000189126	142	142	0.061944	4.191e-36	5.951e-34	1
hsa-miR-130b-3p	AR	1	0.000189126	160	160	0.08441	3.753e-36	6.005e-34	1
hsa-miR-31-3p	E2F3	0.947	60.0144	119	119	0.092023	5.196e-36	6.183e-34	1
hsa-miR-19b-1-5p	SCML2	1	0.000189126	82	82	0.109221	7.572e-36	6.209e-34	1
hsa-miR-16-2-3p	LDB2	0.998	35.422	220	220	0.081252	2.871e-36	6.316e-34	1
hsa-let-7d-5p	TAF4B	0.765	81.2149	170	170	0.076812	3.874e-36	6.586e-34	1
hsa-let-7a-2-3p	ZNF532	0.998	35.422	99	99	0.078103	6.781e-36	6.713e-34	1
hsa-miR-3926	BCL11A	0.955	58.4189	197	197	0.065902	3.461e-36	6.818e-34	1
hsa-miR-378c	YBX1	0.999	30.3054	204	204	0.063719	3.817e-36	7.787e-34	1
hsa-miR-106b-5p	MKL2	0.933	62.756	223	223	0.079418	3.558e-36	7.934e-34	1
hsa-miR-323a-3p	TBX5	1	0.000189126	57	57	0.087578	1.424e-35	8.117e-34	1
hsa-miR-493-5p	BCL11A	0.999	30.3054	197	197	0.064345	4.227e-36	8.327e-34	1
hsa-miR-519b-3p	FOXA1	1	0.000189126	479	479	0.035383	1.76e-36	8.43e-34	1
hsa-miR-222-3p	ZNF462	0.605	93.0717	100	100	0.101756	9.195e-36	9.195e-34	1
hsa-miR-516a-5p	ZNF521	1	0.000189126	143	143	0.147153	6.778e-36	9.693e-34	1
hsa-miR-505-3p	APBB2	1	0.000189126	86	86	0.110092	1.18e-35	1.015e-33	1
hsa-miR-506-3p	BCL11A	0.994	42.9842	197	197	0.056571	5.271e-36	1.038e-33	1
hsa-miR-188-5p	ESR1	0.978	52.0323	267	267	0.084485	4.427e-36	1.182e-33	1
hsa-miR-31-5p	ID4	0.904	67.1655	58	58	0.115248	2.039e-35	1.183e-33	1
hsa-miR-1205	ZNF367	1	0.000189126	93	93	0.004869	1.31e-35	1.218e-33	1
hsa-miR-675-3p	ZEB1	0.9	67.6685	385	385	0.069842	3.236e-36	1.246e-33	1
hsa-miR-527	FOXN2	0.979	51.6176	309	309	0.038467	4.106e-36	1.269e-33	1
hsa-miR-200b-3p	ZEB2	1	0.000189126	312	312	0.063016	4.328e-36	1.35e-33	1
hsa-miR-29b-3p	NAP1L3	1	0.000189126	150	150	0.070421	9.048e-36	1.357e-33	1
hsa-miR-3186-5p	YBX1	0.998	35.422	204	204	0.060253	6.664e-36	1.359e-33	1
hsa-let-7c	HAND2	1	0.000189126	47	47	0.089619	2.968e-35	1.395e-33	1
hsa-miR-141-3p	FLI1	1	0.000189126	273	273	0.071728	5.404e-36	1.475e-33	1
hsa-miR-188-3p	E2F3	0.965	56.1655	119	119	0.077876	1.249e-35	1.486e-33	1
hsa-miR-33a-5p	RUNX1T1	1	0.000189126	123	123	0.083185	1.212e-35	1.491e-33	1
hsa-miR-548f	TAF5	1	0.000189126	72	72	0.078741	2.148e-35	1.547e-33	1
hsa-miR-3612	ASH1L	0.575	94.9206	99	99	0.002805	1.627e-35	1.611e-33	1
hsa-miR-485-3p	LDB2	1	0.000189126	220	220	0.058482	7.844e-36	1.726e-33	1
hsa-miR-323b-3p	GLIS3	0.957	57.9431	112	112	0.068187	1.574e-35	1.763e-33	1
hsa-miR-203	NFIL3	1	0.000189126	136	136	0.095871	1.307e-35	1.778e-33	1
hsa-miR-9-5p	RAD51	0.995	41.8528	94	94	0.14922	1.897e-35	1.783e-33	1
hsa-miR-202-5p	BCL11A	1	0.000189126	197	197	0.063224	1.023e-35	2.015e-33	1
hsa-miR-586	BCL11A	1	0.000189126	197	197	0.027364	1.102e-35	2.171e-33	1
hsa-miR-221-3p	ETS1	0.967	55.6329	147	147	0.096008	1.515e-35	2.227e-33	1
hsa-miR-382-5p	NRK	0.659	88.9968	53	53	0.142469	4.644e-35	2.461e-33	1
hsa-miR-377-3p	ETS1	0.989	46.9549	147	147	0.065692	1.736e-35	2.552e-33	1
hsa-miR-577	EN1	0.985	48.8707	135	135	0.261077	1.9e-35	2.565e-33	1
hsa-miR-103a-3p	BCL11A	0.998	35.422	197	197	0.065582	1.307e-35	2.575e-33	1
hsa-miR-299-3p	EBF3	0.999	30.3054	79	79	0.055718	3.341e-35	2.639e-33	1
hsa-miR-202-5p	HOXA7	0.978	52.0323	84	84	0.068553	3.157e-35	2.652e-33	1
hsa-miR-3202	EOMES	1	0.000189126	27	27	0.089661	1.018e-34	2.749e-33	1
hsa-miR-600	ZEB1	1	0.000189126	385	385	0.038819	7.598e-36	2.925e-33	1
hsa-miR-16-1-3p	EZH2	0.604	93.1338	100	100	0.066472	3.052e-35	3.052e-33	1
hsa-miR-3662	ZNF367	0.993	43.8171	93	93	0.093829	3.657e-35	3.401e-33	1
hsa-miR-194-5p	BCL11A	0.688	87.2117	197	197	0.076312	1.749e-35	3.446e-33	1
hsa-miR-17-5p	RUNX3	1	0.000189126	91	91	0.123901	3.838e-35	3.493e-33	1
hsa-miR-499a-5p	PHF21B	1	0.000189126	161	161	0.08295	2.184e-35	3.516e-33	1
hsa-let-7d-5p	ZFYVE16	1	0.000189126	153	153	0.070557	2.35e-35	3.595e-33	1
hsa-miR-218-5p	ZEB2	1	0.000189126	312	312	0.059076	1.18e-35	3.682e-33	1
hsa-miR-548d-3p	TULP3	1	0.000189126	69	69	0.105931	5.479e-35	3.781e-33	1
hsa-miR-100-5p	HOXA1	1	0.000189126	67	67	0.084522	5.882e-35	3.941e-33	1
hsa-miR-302d-3p	ARID4A	1	0.000189126	115	115	0.007654	3.439e-35	3.955e-33	1
hsa-miR-3169	ARID4A	0.831	75.2145	115	115	0.007251	3.661e-35	4.21e-33	1
hsa-miR-141-3p	SOX17	1	0.000189126	90	90	0.090966	4.882e-35	4.394e-33	1
hsa-let-7a-5p	EBF1	0.999	30.3054	232	232	0.071912	1.924e-35	4.464e-33	1
hsa-miR-548b-5p	ZNF367	1	0.000189126	93	93	0.065851	4.982e-35	4.633e-33	1
hsa-miR-888-5p	ZNF521	0.95	59.4113	143	143	0.021781	3.327e-35	4.758e-33	1
hsa-miR-590-5p	E2F3	1	0.000189126	119	119	0.120653	4.015e-35	4.778e-33	1
hsa-miR-381	ID4	0.98	51.2666	58	58	0.132232	8.49e-35	4.924e-33	1
hsa-miR-30e-3p	TCF7L1	0.936	62.2593	132	132	0.072015	3.818e-35	5.04e-33	1
hsa-miR-3652	BCL11A	1	0.000189126	197	197	0.077258	2.615e-35	5.152e-33	1
hsa-miR-152	BCL11A	1	0.000189126	197	197	0.074826	2.731e-35	5.38e-33	1
hsa-miR-125b-5p	FOXQ1	0.715	84.5983	64	64	0.085303	8.51e-35	5.446e-33	1
hsa-miR-3928	LDB2	0.999	30.3054	220	220	0.065886	2.495e-35	5.489e-33	1
hsa-miR-495	EBF3	1	0.000189126	79	79	0.079489	6.96e-35	5.498e-33	1
hsa-miR-507	BCL11A	1	0.000189126	197	197	0.045217	2.9e-35	5.713e-33	1
hsa-miR-155-3p	ST18	1	0.000189126	70	70	0.090983	8.403e-35	5.882e-33	1
hsa-miR-376a-3p	KLF15	1	0.000189126	104	104	0.069375	5.751e-35	5.981e-33	1
hsa-miR-200a-3p	ZFPM2	0.999	30.3054	150	150	0.077065	4.119e-35	6.179e-33	1
hsa-miR-142-5p	TNFAIP3	0.765	81.2149	74	74	0.09928	8.624e-35	6.382e-33	1
hsa-miR-16-5p	OSR1	0.979	51.6176	113	113	0.077247	5.981e-35	6.759e-33	1
hsa-miR-1	DMRT2	0.961	57.1053	47	47	0.104875	1.46e-34	6.862e-33	1
hsa-miR-875-5p	BCL11A	0.999	30.3054	197	197	0.025985	3.519e-35	6.932e-33	1
hsa-miR-1	ETS1	0.868	71.8229	147	147	0.07176	5.104e-35	7.503e-33	1
hsa-miR-518a-3p	BCL11A	0.947	60.0144	197	197	0.035402	4.099e-35	8.075e-33	1
hsa-miR-135b-5p	ZNF831	0.922	64.3227	202	202	0.151438	4.284e-35	8.654e-33	1
hsa-miR-338-5p	IKZF1	0.999	30.3054	270	270	0.071049	3.264e-35	8.813e-33	1
hsa-miR-142-5p	POU3F1	0.608	92.8824	19	19	0.260686	4.908e-34	9.325e-33	1
hsa-miR-154-5p	SALL1	1	0.000189126	76	76	0.069581	1.29e-34	9.804e-33	1
hsa-miR-3675-3p	MATR3	0.677	87.8912	159	159	0.006014	6.604e-35	1.05e-32	1
hsa-miR-409-5p	HIC1	0.971	54.5782	123	123	0.067097	8.533e-35	1.05e-32	1
hsa-miR-33b-3p	BCL11A	0.999	30.3054	197	197	0.066875	5.584e-35	1.1e-32	1
hsa-miR-708-3p	BACH2	0.533	97.9234	142	142	0.062722	7.87e-35	1.118e-32	1
hsa-miR-942	APBB2	0.675	88.0223	86	86	0.088382	1.374e-34	1.182e-32	1
hsa-miR-3129-5p	ZEB1	0.628	90.8858	385	385	0.069833	3.103e-35	1.195e-32	1
hsa-miR-655	BHLHE22	1	0.000189126	61	61	0.070268	1.994e-34	1.216e-32	1
hsa-miR-3156-5p	ADNP	0.854	73.1224	130	130	0.024042	9.905e-35	1.288e-32	1
hsa-miR-421	E2F8	0.972	53.8807	103	103	0.082755	1.456e-34	1.5e-32	1
hsa-miR-3119	EYA4	0.844	74.0067	41	41	0.012291	3.786e-34	1.552e-32	1
hsa-miR-409-3p	TBX15	1	0.000189126	35	35	0.122102	4.641e-34	1.624e-32	1
hsa-miR-493-5p	LZTS1	0.624	91.1302	87	87	0.066967	1.971e-34	1.715e-32	1
hsa-miR-1193	MEOX2	0.817	76.801	163	163	0.048431	1.097e-34	1.788e-32	1
hsa-miR-3606	HOXC8	0.997	38.6214	32	32	0.070948	6.031e-34	1.93e-32	1
hsa-miR-524-5p	FOXN2	0.92	64.6001	309	309	0.019755	6.756e-35	2.088e-32	1
hsa-miR-221-3p	TCF7L1	0.922	64.3227	132	132	0.107504	1.741e-34	2.298e-32	1
hsa-miR-137	KLF11	1	0.000189126	124	124	0.104607	1.879e-34	2.33e-32	1
hsa-miR-369-3p	RUNX2	1	0.000189126	81	81	0.076653	2.927e-34	2.371e-32	1
hsa-miR-410	TBX15	0.956	58.1657	35	35	0.117678	6.861e-34	2.401e-32	1
hsa-miR-3922-3p	FLI1	0.501	99.9372	273	273	0.052744	9.265e-35	2.529e-32	1
hsa-miR-383	SOX8	0.703	85.4061	57	57	0.137789	4.821e-34	2.748e-32	1
hsa-miR-9-5p	PHF19	0.999	30.3054	76	76	0.171636	3.945e-34	2.998e-32	1
hsa-miR-105-5p	FOSL1	0.89	68.8581	110	110	0.196355	2.858e-34	3.144e-32	1
hsa-miR-18a-5p	ESR1	0.996	40.3642	267	267	0.130786	1.231e-34	3.287e-32	1
hsa-miR-605	TSHZ2	0.973	53.614	198	198	0.064855	1.716e-34	3.398e-32	1
hsa-miR-196a-5p	BCL11A	0.999	30.3054	197	197	0.065066	1.759e-34	3.465e-32	1
hsa-miR-150-5p	STAT4	0.852	73.306	28	28	0.36173	1.247e-33	3.492e-32	1
hsa-miR-375	SLC26A3	0.787	79.0687	117	117	0.082836	2.996e-34	3.505e-32	1
hsa-miR-15a-5p	OSR1	1	0.000189126	113	113	0.07004	3.406e-34	3.849e-32	1
hsa-miR-26a-5p	TP63	1	0.000189126	117	117	0.07408	3.417e-34	3.998e-32	1
hsa-miR-934	FOXA1	0.994	42.9842	479	479	0.277484	8.457e-35	4.051e-32	1
hsa-miR-146a-3p	WWTR1	1	0.000189126	226	226	0.106231	1.849e-34	4.179e-32	1
hsa-let-7a-3p	TP63	1	0.000189126	117	117	0.074443	3.579e-34	4.187e-32	1
hsa-miR-2355-3p	GATA3	1	0.000189126	342	342	0.071618	1.253e-34	4.285e-32	1
hsa-miR-888-5p	ZCCHC24	0.904	67.1655	272	272	0.022758	1.617e-34	4.398e-32	1
hsa-miR-411-3p	HOXA7	1	0.000189126	84	84	0.074149	5.414e-34	4.548e-32	1
hsa-miR-138-5p	TOX	0.925	63.8991	51	51	0.13214	8.928e-34	4.553e-32	1
hsa-miR-1283	CREB3L2	0.859	72.6824	128	128	0.037754	3.702e-34	4.739e-32	1
hsa-miR-664-5p	PAX5	0.532	97.9896	92	92	0.070739	5.157e-34	4.744e-32	1
hsa-miR-142-3p	GFI1	0.767	81.0766	25	25	0.273211	1.953e-33	4.883e-32	1
hsa-miR-944	EN2	1	0.000189126	77	77	0.090641	6.434e-34	4.954e-32	1
hsa-miR-4306	BCL11A	1	0.000189126	197	197	0.084837	2.515e-34	4.955e-32	1
hsa-miR-10b-3p	ZNF474	1	0.000189126	75	75	0.082138	6.651e-34	4.988e-32	1
hsa-miR-485-5p	BCL11A	0.994	42.9842	197	197	0.058986	2.588e-34	5.098e-32	1
hsa-miR-3682-3p	MKL2	1	0.000189126	223	223	0.067081	2.359e-34	5.261e-32	1
hsa-miR-16-5p	PLAGL1	0.998	35.422	234	234	0.068705	2.35e-34	5.499e-32	1
hsa-miR-223-3p	TOX	1	0.000189126	51	51	0.11795	1.145e-33	5.839e-32	1
hsa-miR-224-5p	HMGA1	0.997	38.6214	79	79	0.15077	8.075e-34	6.379e-32	1
hsa-miR-223-3p	OSR1	0.693	86.1096	113	113	0.104031	5.772e-34	6.522e-32	1
hsa-miR-548s	CIITA	0.847	73.7459	99	99	0.08882	6.65e-34	6.584e-32	1
hsa-miR-338-5p	ZNF831	0.997	38.6214	202	202	0.072714	3.353e-34	6.773e-32	1
hsa-miR-1254	EBF1	0.998	35.422	232	232	0.06318	2.943e-34	6.828e-32	1
hsa-miR-214-5p	OSR1	0.923	64.1831	113	113	0.065997	6.084e-34	6.875e-32	1
hsa-miR-409-3p	EBF3	1	0.000189126	79	79	0.079205	8.854e-34	6.995e-32	1
hsa-miR-144-3p	EBF1	0.997	38.6214	232	232	0.087974	3.037e-34	7.046e-32	1
hsa-miR-204-5p	ZNF521	0.999	30.3054	143	143	0.08336	4.976e-34	7.116e-32	1
hsa-miR-934	MLLT10	0.976	52.641	76	76	0.204374	1.047e-33	7.957e-32	1
hsa-miR-7-5p	UHRF1	1	0.000189126	66	66	0.111611	1.221e-33	8.059e-32	1
hsa-miR-30a-5p	CBX2	0.6	93.3781	159	159	0.069066	5.244e-34	8.338e-32	1
hsa-miR-212-3p	KCMF1	1	0.000189126	235	235	0.071237	3.556e-34	8.357e-32	1
hsa-miR-337-3p	TBX5	1	0.000189126	57	57	0.117616	1.47e-33	8.379e-32	1
hsa-miR-3622a-3p	BACH2	0.997	38.6214	142	142	0.089678	6.013e-34	8.538e-32	1
hsa-miR-3675-3p	SUZ12	1	0.000189126	104	104	0.006994	8.241e-34	8.571e-32	1
hsa-miR-17-5p	ATAD2	1	0.000189126	63	63	0.124048	1.399e-33	8.814e-32	1
hsa-miR-1197	PTRF	1	0.000189126	232	232	0.053786	3.922e-34	9.099e-32	1
hsa-miR-518b	ZNF462	0.714	84.67	100	100	0.127562	1.033e-33	1.033e-31	1
hsa-miR-22-3p	ZEB1	0.997	38.6214	385	385	0.057679	2.69e-34	1.036e-31	1
hsa-miR-17-5p	TAF5	0.915	65.3245	72	72	0.113809	1.495e-33	1.076e-31	1
hsa-miR-30c-1-3p	OSR1	0.71	84.9276	113	113	0.064945	1.009e-33	1.14e-31	1
hsa-miR-544b	MEOX2	0.996	40.3642	163	163	0.049191	7.086e-34	1.155e-31	1
hsa-miR-379-3p	HOXA7	1	0.000189126	84	84	0.06316	1.378e-33	1.158e-31	1
hsa-miR-200c-3p	ZEB2	1	0.000189126	312	312	0.060441	3.767e-34	1.175e-31	1
hsa-miR-33a-5p	MEOX2	1	0.000189126	163	163	0.077647	7.22e-34	1.177e-31	1
hsa-miR-520d-3p	BCL11A	1	0.000189126	197	197	0.03732	6.059e-34	1.194e-31	1
hsa-miR-33b-5p	BCL11A	1	0.000189126	197	197	0.087508	6.146e-34	1.211e-31	1
hsa-miR-302d-3p	EBF3	0.637	90.3514	79	79	0.011579	1.55e-33	1.224e-31	1
hsa-miR-590-3p	ZNF396	0.878	70.192	237	237	0.078352	5.372e-34	1.273e-31	1
hsa-miR-548d-3p	TCF7L1	1	0.000189126	132	132	0.122981	1.04e-33	1.373e-31	1
hsa-miR-375	YBX1	0.998	35.422	204	204	0.066829	6.92e-34	1.412e-31	1
hsa-miR-214-3p	BMP2	0.992	44.957	81	81	0.081602	1.765e-33	1.43e-31	1
hsa-miR-655	RUNX1T1	1	0.000189126	123	123	0.06655	1.205e-33	1.482e-31	1
hsa-miR-548d-3p	PHF19	1	0.000189126	76	76	0.143289	1.988e-33	1.511e-31	1
hsa-let-7a-2-3p	HOXA4	0.987	48	72	72	0.078102	2.285e-33	1.645e-31	1
hsa-miR-145-5p	ZNF521	1	0.000189126	143	143	0.063233	1.161e-33	1.66e-31	1
hsa-miR-9-5p	FOXN2	0.976	52.641	309	309	0.134584	5.711e-34	1.765e-31	1
hsa-miR-493-3p	BCL11A	0.999	30.3054	197	197	0.064425	9.205e-34	1.813e-31	1
hsa-miR-28-3p	ANKRD1	0.861	72.4825	98	98	0.082371	1.893e-33	1.855e-31	1
hsa-miR-130a-3p	BACH2	0.985	48.8707	142	142	0.081791	1.354e-33	1.923e-31	1
hsa-miR-520d-5p	FOXC1	1	0.000189126	406	406	0.035419	4.765e-34	1.935e-31	1
hsa-miR-135b-5p	XBP1	0.998	35.422	243	243	0.254198	8.079e-34	1.963e-31	1
hsa-miR-511	TOX	1	0.000189126	51	51	0.105721	3.98e-33	2.03e-31	1
hsa-miR-675-3p	TBX18	0.884	69.5123	123	123	0.06833	1.654e-33	2.034e-31	1
hsa-miR-93-5p	E2F1	1	0.000189126	136	136	0.085772	1.498e-33	2.037e-31	1
hsa-miR-1276	ZNF695	0.583	94.4335	103	103	0.09186	2.112e-33	2.175e-31	1
hsa-miR-410	FOXQ1	1	0.000189126	64	64	0.087616	3.536e-33	2.263e-31	1
hsa-miR-199a-5p	ETS1	0.86	72.5746	147	147	0.060152	1.557e-33	2.289e-31	1
hsa-miR-1269a	BCL11A	0.976	52.641	197	197	0.204997	1.244e-33	2.451e-31	1
hsa-miR-1197	EBF3	1	0.000189126	79	79	0.063239	3.124e-33	2.468e-31	1
hsa-miR-3606	TSHZ2	1	0.000189126	198	198	0.04964	1.319e-33	2.612e-31	1
hsa-miR-1271-5p	TCF7L1	0.998	35.422	132	132	0.065671	2.026e-33	2.674e-31	1
hsa-miR-20a-5p	RUNX3	0.998	35.422	91	91	0.115742	3.034e-33	2.761e-31	1
hsa-miR-3156-5p	LCOR	0.945	60.3862	104	104	0.026764	2.702e-33	2.81e-31	1
hsa-miR-577	XBP1	0.981	50.9165	243	243	0.277327	1.303e-33	3.166e-31	1
hsa-miR-30a-3p	MEOX2	0.999	30.3054	163	163	0.070497	2.226e-33	3.628e-31	1
hsa-miR-15a-5p	MEOX2	1	0.000189126	163	163	0.064964	2.295e-33	3.741e-31	1
hsa-miR-767-5p	WWTR1	0.897	68.0241	226	226	0.176947	1.674e-33	3.783e-31	1
hsa-miR-196a-3p	FOXC1	1	0.000189126	406	406	0.078036	9.356e-34	3.799e-31	1
hsa-miR-222-3p	FOXN2	0.985	48.8707	309	309	0.082047	1.254e-33	3.875e-31	1
hsa-miR-576-5p	PHF19	0.994	42.9842	76	76	0.127953	5.175e-33	3.933e-31	1
hsa-miR-145-5p	ZFPM2	1	0.000189126	150	150	0.067685	2.631e-33	3.946e-31	1
hsa-miR-130a-3p	FOXQ1	1	0.000189126	64	64	0.105107	6.255e-33	4.003e-31	1
hsa-miR-135b-5p	FOXQ1	0.77	80.312	64	64	0.220028	6.305e-33	4.035e-31	1
hsa-miR-152	HOXC8	1	0.000189126	32	32	0.119467	1.297e-32	4.15e-31	1
hsa-miR-1825	ATRX	0.986	48.4564	134	134	0.005543	3.115e-33	4.174e-31	1
hsa-miR-185-5p	OSR1	0.815	76.9535	113	113	0.077486	3.762e-33	4.251e-31	1
hsa-miR-582-3p	TCF7L1	0.903	67.2952	132	132	0.102471	3.235e-33	4.27e-31	1
hsa-miR-376a-3p	BNC1	0.999	30.3054	64	64	0.08432	6.767e-33	4.331e-31	1
hsa-miR-92b-3p	BCL11A	0.999	30.3054	197	197	0.068422	2.271e-33	4.474e-31	1
hsa-miR-29a-3p	TNFAIP3	1	0.000189126	74	74	0.083634	6.429e-33	4.757e-31	1
hsa-miR-19a-5p	ZNF695	0.893	68.509	103	103	0.074609	4.762e-33	4.905e-31	1
hsa-miR-96-5p	ATOH8	0.976	52.641	130	130	0.068453	3.897e-33	5.066e-31	1
hsa-miR-29b-2-5p	DACH1	0.932	62.9156	82	82	0.106172	6.213e-33	5.095e-31	1
hsa-miR-127-3p	TWIST1	0.622	91.2663	25	25	0.183165	2.083e-32	5.208e-31	1
hsa-miR-93-5p	SCML2	0.944	60.5676	82	82	0.094503	6.398e-33	5.246e-31	1
hsa-let-7d-5p	E2F3	0.686	87.3478	119	119	0.090561	4.564e-33	5.431e-31	1
hsa-miR-19a-5p	SCML2	1	0.000189126	82	82	0.070062	6.688e-33	5.484e-31	1
hsa-miR-488-5p	LHX6	0.787	79.0687	39	39	0.074041	1.458e-32	5.686e-31	1
hsa-miR-654-3p	TBX5	0.924	64.0462	57	57	0.073616	1.016e-32	5.791e-31	1
hsa-miR-491-3p	KCMF1	0.66	88.9426	235	235	0.068443	2.53e-33	5.946e-31	1
hsa-miR-125b-2-3p	HAND2	0.902	67.4195	47	47	0.091467	1.334e-32	6.27e-31	1
hsa-miR-3675-3p	APC	0.998	35.422	135	135	0.005952	4.696e-33	6.34e-31	1
hsa-miR-7-1-3p	BCL11A	0.999	30.3054	197	197	0.085093	3.304e-33	6.509e-31	1
hsa-miR-19b-3p	E2F8	1	0.000189126	103	103	0.104042	6.512e-33	6.707e-31	1
hsa-miR-449a	ESR1	0.781	79.5059	267	267	0.137603	2.921e-33	7.799e-31	1
hsa-miR-18a-5p	ETV6	1	0.000189126	151	151	0.135204	5.792e-33	8.746e-31	1
hsa-miR-16-2-3p	TSHZ3	1	0.000189126	190	190	0.080383	4.714e-33	8.957e-31	1
hsa-miR-186-5p	E2F8	0.999	30.3054	103	103	0.095153	8.713e-33	8.974e-31	1
hsa-miR-376b	KLF15	1	0.000189126	104	104	0.065178	8.638e-33	8.984e-31	1
hsa-miR-495	RUNX2	1	0.000189126	81	81	0.082867	1.199e-32	9.712e-31	1
hsa-miR-501-3p	E2F3	0.996	40.3642	119	119	0.088488	8.524e-33	1.014e-30	1
hsa-miR-548b-5p	ETV6	1	0.000189126	151	151	0.075758	6.911e-33	1.044e-30	1
hsa-miR-429	ZCCHC24	1	0.000189126	272	272	0.073809	4.022e-33	1.094e-30	1
hsa-miR-543	ZFPM2	1	0.000189126	150	150	0.057476	7.363e-33	1.104e-30	1
hsa-miR-150-5p	EBF3	0.588	94.1371	79	79	0.083371	1.409e-32	1.113e-30	1
hsa-miR-543	BMP2	1	0.000189126	81	81	0.057969	1.386e-32	1.123e-30	1
hsa-miR-875-3p	ZDHHC17	1	0.000189126	138	138	0.014875	8.344e-33	1.151e-30	1
hsa-miR-19b-3p	SCML2	1	0.000189126	82	82	0.103581	1.488e-32	1.22e-30	1
hsa-miR-369-3p	BMP2	0.963	56.6374	81	81	0.067275	1.528e-32	1.238e-30	1
hsa-miR-183-3p	RUNX1T1	1	0.000189126	123	123	0.064828	1.043e-32	1.283e-30	1
hsa-miR-934	XBP1	0.975	52.9929	243	243	0.265976	5.304e-33	1.289e-30	1
hsa-miR-10b-3p	EN1	0.836	74.7044	135	135	0.065541	9.692e-33	1.308e-30	1
hsa-miR-124-3p	EZH2	1	0.000189126	100	100	0.042747	1.315e-32	1.315e-30	1
hsa-miR-3926	ZEB2	0.966	55.8939	312	312	0.049878	4.469e-33	1.394e-30	1
hsa-miR-92a-3p	KDM2B	1	0.000189126	123	123	0.085682	1.195e-32	1.47e-30	1
hsa-miR-3120-3p	SRF	0.993	43.8171	78	78	0.04794	1.945e-32	1.517e-30	1
hsa-miR-539-5p	BACH2	0.72	84.2657	142	142	0.065093	1.101e-32	1.563e-30	1
hsa-miR-424-5p	OSR1	0.917	65.0227	113	113	0.079276	1.384e-32	1.564e-30	1
hsa-miR-577	SOX8	0.984	49.3046	57	57	0.293747	2.811e-32	1.602e-30	1
hsa-miR-450b-5p	BACH2	0.984	49.3046	142	142	0.068438	1.141e-32	1.62e-30	1
hsa-miR-494	HOXA7	1	0.000189126	84	84	0.07656	1.942e-32	1.631e-30	1
hsa-miR-887	BCL11A	1	0.000189126	197	197	0.080815	8.514e-33	1.677e-30	1
hsa-miR-539-5p	BCL11A	1	0.000189126	197	197	0.07038	8.708e-33	1.715e-30	1
hsa-miR-543	BACH2	0.941	61.4501	142	142	0.055976	1.214e-32	1.724e-30	1
hsa-miR-125b-5p	HOXA1	0.992	44.957	67	67	0.080143	2.748e-32	1.841e-30	1
hsa-miR-301b	E2F7	1	0.000189126	67	67	0.110896	2.884e-32	1.932e-30	1
hsa-let-7i-5p	POU2F2	1	0.000189126	65	65	0.084097	3.21e-32	2.087e-30	1
hsa-let-7a-2-3p	ID4	1	0.000189126	58	58	0.093299	4.742e-32	2.75e-30	1
hsa-miR-574-5p	TCERG1	1	0.000189126	87	87	0.031341	3.242e-32	2.821e-30	1
hsa-miR-381	NFIL3	0.995	41.8528	136	136	0.075824	2.081e-32	2.83e-30	1
hsa-miR-382-5p	HOXA1	1	0.000189126	67	67	0.07177	4.244e-32	2.843e-30	1
hsa-miR-655	ZEB2	1	0.000189126	312	312	0.049578	9.194e-33	2.869e-30	1
hsa-miR-656	HOXA7	1	0.000189126	84	84	0.059579	3.505e-32	2.944e-30	1
hsa-miR-708-3p	BCL11A	1	0.000189126	197	197	0.070043	1.507e-32	2.969e-30	1
hsa-miR-670	MYT1	0.86	72.5746	159	159	0.024391	1.878e-32	2.986e-30	1
hsa-miR-411-3p	RUNX2	0.619	91.4666	81	81	0.072863	3.857e-32	3.124e-30	1
hsa-miR-365a-5p	BCL11A	0.895	68.2732	197	197	0.067207	1.65e-32	3.251e-30	1
hsa-miR-17-5p	ZNF367	0.999	30.3054	93	93	0.119253	3.528e-32	3.281e-30	1
hsa-miR-501-5p	NFIL3	0.99	46.3194	136	136	0.098907	2.66e-32	3.618e-30	1
hsa-miR-3674	ETV5	0.619	91.4666	128	128	0.00334	3.204e-32	4.101e-30	1
hsa-miR-577	KLF5	0.994	42.9842	70	70	0.227007	6.127e-32	4.289e-30	1
hsa-miR-3674	EGR2	0.934	62.5856	47	47	0.005211	9.167e-32	4.308e-30	1
hsa-miR-582-3p	E2F3	0.851	73.4023	119	119	0.096819	3.622e-32	4.31e-30	1
hsa-miR-10a-5p	GATA3	1	0.000189126	342	342	0.096851	1.374e-32	4.699e-30	1
hsa-miR-302d-3p	REST	0.617	91.6043	145	145	0.00641	3.547e-32	5.143e-30	1
hsa-miR-190b	FOXP1	1	0.000189126	127	127	0.082921	4.297e-32	5.457e-30	1
hsa-miR-379-5p	FOXF2	1	0.000189126	42	42	0.123378	1.39e-31	5.838e-30	1
hsa-miR-301b	ESR1	1	0.000189126	267	267	0.081843	2.285e-32	6.101e-30	1
hsa-miR-877-5p	POLR1C	0.903	67.2952	84	84	0.092011	7.592e-32	6.377e-30	1
hsa-miR-409-5p	WWTR1	1	0.000189126	226	226	0.057655	2.918e-32	6.595e-30	1
hsa-miR-3606	MEOX2	0.995	41.8528	163	163	0.050312	4.059e-32	6.616e-30	1
hsa-miR-508-5p	ZFP57	0.901	67.5479	60	60	0.120979	1.105e-31	6.63e-30	1
hsa-miR-454-3p	TP63	1	0.000189126	117	117	0.079366	6.403e-32	7.492e-30	1
hsa-miR-496	TCF4	1	0.000189126	104	104	0.07106	7.341e-32	7.635e-30	1
hsa-miR-18b-5p	TCF7L1	0.921	64.4653	132	132	0.12612	5.854e-32	7.727e-30	1
hsa-miR-4310	AFF4	0.871	71.5275	244	244	0.004808	3.215e-32	7.845e-30	1
hsa-miR-15b-3p	HDGF	1	0.000189126	69	69	0.111928	1.141e-31	7.873e-30	1
hsa-miR-499a-5p	BNC1	1	0.000189126	64	64	0.07242	1.286e-31	8.23e-30	1
hsa-miR-186-5p	ZFYVE16	0.859	72.6824	153	153	0.072986	5.39e-32	8.247e-30	1
hsa-miR-654-3p	BMP2	1	0.000189126	81	81	0.062256	1.04e-31	8.424e-30	1
hsa-miR-200b-3p	BACH2	1	0.000189126	142	142	0.070014	6.046e-32	8.585e-30	1
hsa-miR-34b-3p	TP63	0.553	96.2587	117	117	0.09695	7.731e-32	9.045e-30	1
hsa-miR-29b-3p	PTRF	0.837	74.6204	232	232	0.071034	3.902e-32	9.053e-30	1
hsa-miR-381	SNAI1	0.667	88.5229	96	96	0.083264	9.7e-32	9.312e-30	1
hsa-miR-99a-5p	HOXA1	1	0.000189126	67	67	0.068332	1.457e-31	9.762e-30	1
hsa-miR-381	IRX1	1	0.000189126	71	71	0.087107	1.402e-31	9.954e-30	1
hsa-miR-664-3p	BCL11A	1	0.000189126	197	197	0.080853	5.165e-32	1.018e-29	1
hsa-miR-154-3p	TBX18	0.956	58.1657	123	123	0.065953	8.626e-32	1.061e-29	1
hsa-miR-138-5p	KLF11	0.637	90.3514	124	124	0.101965	8.61e-32	1.068e-29	1
hsa-miR-3116	E2F3	0.999	30.3054	119	119	0.056146	9.148e-32	1.089e-29	1
hsa-miR-410	TBX5	1	0.000189126	57	57	0.09186	1.931e-31	1.101e-29	1
hsa-let-7a-5p	BTG2	0.785	79.2213	133	133	0.065195	8.508e-32	1.132e-29	1
hsa-miR-222-5p	ST18	0.68	87.71	70	70	0.09063	1.638e-31	1.147e-29	1
hsa-miR-30d-3p	TBX21	0.994	42.9842	163	163	0.068902	7.049e-32	1.149e-29	1
hsa-miR-30e-5p	YBX1	1	0.000189126	204	204	0.0839	5.882e-32	1.2e-29	1
hsa-miR-548d-5p	ZNF148	0.935	62.4278	90	90	0.003013	1.351e-31	1.216e-29	1
hsa-miR-22-3p	HOXC8	0.523	98.5776	32	32	0.111028	3.817e-31	1.221e-29	1
hsa-miR-18a-3p	ESR1	0.998	35.422	267	267	0.104176	4.586e-32	1.224e-29	1
hsa-miR-3675-3p	LCOR	0.993	43.8171	104	104	0.006919	1.208e-31	1.256e-29	1
hsa-miR-1271-5p	FOXQ1	1	0.000189126	64	64	0.083074	2.038e-31	1.304e-29	1
hsa-miR-494	EBF3	1	0.000189126	79	79	0.073203	1.677e-31	1.325e-29	1
hsa-miR-495	NKX3-2	0.975	52.9929	70	70	0.070892	1.931e-31	1.352e-29	1
hsa-miR-543	EN2	1	0.000189126	77	77	0.073363	1.914e-31	1.474e-29	1
hsa-miR-155-5p	ETS1	1	0.000189126	147	147	0.095517	1.006e-31	1.479e-29	1
hsa-miR-501-5p	E2F3	0.642	90.0423	119	119	0.108006	1.313e-31	1.562e-29	1
hsa-miR-577	ZNF532	0.938	61.9367	99	99	0.191877	1.602e-31	1.586e-29	1
hsa-miR-379-5p	HOXA1	1	0.000189126	67	67	0.077941	2.372e-31	1.589e-29	1
hsa-miR-93-3p	EBF1	0.915	65.3245	232	232	0.072712	7.18e-32	1.666e-29	1
hsa-miR-100-3p	OSR1	0.857	72.8413	113	113	0.073486	1.539e-31	1.739e-29	1
hsa-miR-22-5p	BCL11A	1	0.000189126	197	197	0.069862	9.122e-32	1.797e-29	1
hsa-miR-16-5p	BACH2	1	0.000189126	142	142	0.068038	1.399e-31	1.987e-29	1
hsa-miR-495	RUNX3	0.57	95.2304	91	91	0.073307	2.239e-31	2.037e-29	1
hsa-miR-15b-5p	E2F7	0.803	77.866	67	67	0.101404	3.068e-31	2.056e-29	1
hsa-miR-942	ZFYVE16	0.989	46.9549	153	153	0.074739	1.379e-31	2.11e-29	1
hsa-miR-155-5p	PHF19	0.669	88.396	76	76	0.106274	2.807e-31	2.133e-29	1
hsa-miR-3910	EN2	1	0.000189126	77	77	0.078928	2.817e-31	2.169e-29	1
hsa-miR-493-5p	TCF4	0.987	48	104	104	0.069181	2.159e-31	2.245e-29	1
hsa-miR-579	FOXA1	0.673	88.1505	479	479	0.043091	4.763e-32	2.281e-29	1
hsa-miR-16-5p	MEOX2	1	0.000189126	163	163	0.07066	1.51e-31	2.461e-29	1
hsa-miR-520a-3p	RUNX3	0.574	94.9814	91	91	0.101692	2.729e-31	2.483e-29	1
hsa-let-7a-2-3p	TSHZ3	1	0.000189126	190	190	0.066578	1.313e-31	2.495e-29	1
hsa-miR-18a-3p	SSRP1	0.998	35.422	105	105	0.129667	2.384e-31	2.503e-29	1
hsa-miR-520a-3p	EBF3	1	0.000189126	79	79	0.102637	3.214e-31	2.539e-29	1
hsa-miR-1263	WWTR1	0.995	41.8528	226	226	0.007357	1.281e-31	2.895e-29	1
hsa-miR-3943	FOXC1	0.762	81.4904	406	406	0.047888	7.187e-32	2.918e-29	1
hsa-miR-221-3p	ZNF462	0.601	93.314	100	100	0.093154	2.969e-31	2.969e-29	1
hsa-miR-1205	SRSF9	1	0.000189126	124	124	0.006886	2.396e-31	2.971e-29	1
hsa-miR-409-5p	GLIS3	1	0.000189126	112	112	0.06415	2.654e-31	2.972e-29	1
hsa-miR-592	ANKRD53	1	0.000189126	92	92	0.079806	3.3e-31	3.036e-29	1
hsa-miR-376c	EN2	1	0.000189126	77	77	0.087983	3.95e-31	3.041e-29	1
hsa-miR-1305	BCL11A	1	0.000189126	197	197	0.055562	1.546e-31	3.046e-29	1
hsa-miR-655	ZEB1	0.988	47.4918	385	385	0.061577	8.025e-32	3.09e-29	1
hsa-miR-93-5p	TAF5	1	0.000189126	72	72	0.095027	4.419e-31	3.182e-29	1
hsa-miR-549	BNC2	1	0.000189126	263	263	0.053344	1.229e-31	3.232e-29	1
hsa-miR-200a-3p	GLI2	1	0.000189126	92	92	0.078121	3.531e-31	3.249e-29	1
hsa-miR-544a	MYT1L	1	0.000189126	26	26	0.065003	1.314e-30	3.416e-29	1
hsa-miR-199a-5p	BNC1	0.956	58.1657	64	64	0.07879	5.417e-31	3.467e-29	1
hsa-miR-145-5p	KLF14	0.943	61.1064	61	61	0.081318	5.911e-31	3.606e-29	1
hsa-miR-200c-5p	ZNF367	1	0.000189126	93	93	0.078394	3.905e-31	3.632e-29	1
hsa-miR-205-3p	EN2	1	0.000189126	77	77	0.085105	4.77e-31	3.673e-29	1
hsa-miR-383	ZEB2	1	0.000189126	312	312	0.098359	1.185e-31	3.697e-29	1
hsa-miR-374a-3p	TOX	1	0.000189126	51	51	0.09041	7.313e-31	3.73e-29	1
hsa-miR-4328	AFF4	0.663	88.7531	244	244	0.002221	1.529e-31	3.731e-29	1
hsa-miR-19a-3p	SCML2	1	0.000189126	82	82	0.117378	5.078e-31	4.164e-29	1
hsa-miR-130b-5p	TCF7L1	0.751	82.2201	132	132	0.094806	3.243e-31	4.281e-29	1
hsa-miR-16-2-3p	ZFPM2	0.999	30.3054	150	150	0.080317	2.884e-31	4.326e-29	1
hsa-miR-421	GATA3	0.916	65.1724	342	342	0.06564	1.312e-31	4.487e-29	1
hsa-miR-376b	BNC1	0.999	30.3054	64	64	0.07806	7.063e-31	4.52e-29	1
hsa-miR-195-5p	DMRT2	1	0.000189126	47	47	0.090553	9.684e-31	4.551e-29	1
hsa-miR-708-5p	MEOX2	0.997	38.6214	163	163	0.060848	2.855e-31	4.654e-29	1
hsa-miR-1271-5p	RCAN1	0.899	67.7898	96	96	0.067453	4.861e-31	4.667e-29	1
hsa-miR-4289	EZH2	0.832	75.08	100	100	0.018293	4.729e-31	4.729e-29	1
hsa-miR-369-3p	PITX2	1	0.000189126	44	44	0.084154	1.113e-30	4.897e-29	1
hsa-miR-16-2-3p	RUNX1T1	1	0.000189126	123	123	0.075341	3.989e-31	4.906e-29	1
hsa-miR-616-5p	ZNF831	0.869	71.7164	202	202	0.058492	2.435e-31	4.919e-29	1
hsa-miR-19a-3p	PPARA	0.546	96.7032	167	167	0.111051	3.085e-31	5.152e-29	1
hsa-miR-20a-5p	TAF5	0.982	50.4983	72	72	0.113701	7.5e-31	5.4e-29	1
hsa-miR-154-3p	RUNX1T1	1	0.000189126	123	123	0.064742	4.452e-31	5.476e-29	1
hsa-miR-139-5p	HOXA7	0.981	50.9165	84	84	0.07549	6.807e-31	5.718e-29	1
hsa-miR-155-5p	GFI1	0.991	45.6945	25	25	0.265272	2.345e-30	5.862e-29	1
hsa-miR-142-5p	GATA3	1	0.000189126	342	342	0.078224	1.772e-31	6.06e-29	1
hsa-miR-206	ZEB2	0.964	56.4165	312	312	0.121955	1.959e-31	6.112e-29	1
hsa-miR-548t-5p	PHF21B	0.982	50.4983	161	161	0.068489	4.174e-31	6.72e-29	1
hsa-miR-550a-3p	FOXA1	1	0.000189126	479	479	0.070699	1.435e-31	6.874e-29	1
hsa-miR-377-3p	EN2	0.993	43.8171	77	77	0.088018	9.071e-31	6.985e-29	1
hsa-miR-204-5p	MEF2C	0.866	72.0169	76	76	0.092682	9.26e-31	7.038e-29	1
hsa-let-7a-3p	BNC1	0.984	49.3046	64	64	0.084689	1.159e-30	7.418e-29	1
hsa-miR-1909-5p	KDM2B	1	0.000189126	123	123	0.064478	6.144e-31	7.557e-29	1
hsa-miR-576-5p	KLF11	1	0.000189126	124	124	0.095628	6.441e-31	7.987e-29	1
hsa-miR-3926	DMRT2	0.926	63.7746	47	47	0.079182	1.759e-30	8.267e-29	1
hsa-miR-877-5p	AR	0.993	43.8171	160	160	0.080236	5.652e-31	9.043e-29	1
hsa-miR-3152-3p	ZBTB11	1	0.000189126	141	141	0.044299	6.499e-31	9.164e-29	1
hsa-miR-146a-5p	HMGA1	0.93	63.2023	79	79	0.109276	1.279e-30	1.01e-28	1
hsa-let-7g-3p	GATA3	0.72	84.2657	342	342	0.061927	3.062e-31	1.047e-28	1
hsa-miR-206	TOX	0.864	72.2049	51	51	0.15686	2.073e-30	1.057e-28	1
hsa-miR-34b-5p	BCL11A	1	0.000189126	197	197	0.098208	5.613e-31	1.106e-28	1
hsa-miR-381	TAX1BP3	1	0.000189126	186	186	0.067944	6.108e-31	1.136e-28	1
hsa-miR-497-5p	PLAGL1	0.892	68.638	234	234	0.062031	5.015e-31	1.174e-28	1
hsa-miR-655	EN2	1	0.000189126	77	77	0.08925	1.526e-30	1.175e-28	1
hsa-miR-548j	KLF15	0.738	83.0721	104	104	0.075425	1.144e-30	1.19e-28	1
hsa-miR-98	CBX2	0.621	91.328	159	159	0.0742	7.646e-31	1.216e-28	1
hsa-miR-3613-5p	TSHZ2	0.883	69.6177	198	198	0.063191	6.679e-31	1.322e-28	1
hsa-miR-133b	FLI1	0.971	54.5782	273	273	0.075708	4.946e-31	1.35e-28	1
hsa-miR-3167	TFDP1	0.736	83.2039	89	89	0.013429	1.543e-30	1.373e-28	1
hsa-miR-20a-5p	ATAD2	0.995	41.8528	63	63	0.114979	2.221e-30	1.399e-28	1
hsa-miR-497-5p	EN2	1	0.000189126	77	77	0.081352	1.825e-30	1.405e-28	1
hsa-miR-135b-5p	HDGF	0.908	66.6779	69	69	0.186224	2.156e-30	1.488e-28	1
hsa-let-7f-1-3p	TP63	1	0.000189126	117	117	0.0591	1.286e-30	1.505e-28	1
hsa-miR-19a-3p	ZDHHC18	0.947	60.0144	119	119	0.127479	1.277e-30	1.52e-28	1
hsa-miR-101-3p	GATA3	1	0.000189126	342	342	0.06043	4.837e-31	1.654e-28	1
hsa-miR-381	SALL1	1	0.000189126	76	76	0.07794	2.256e-30	1.715e-28	1
hsa-miR-221-5p	IRX6	0.895	68.2732	75	75	0.079498	2.315e-30	1.736e-28	1
hsa-miR-221-3p	TOX	1	0.000189126	51	51	0.119353	3.527e-30	1.799e-28	1
hsa-miR-9-3p	WWTR1	0.985	48.8707	226	226	0.130929	8.096e-31	1.83e-28	1
hsa-miR-224-3p	TOX	1	0.000189126	51	51	0.109526	3.628e-30	1.85e-28	1
hsa-miR-548d-3p	HDGF	1	0.000189126	69	69	0.119945	2.696e-30	1.86e-28	1
hsa-miR-195-5p	EN2	1	0.000189126	77	77	0.11281	2.43e-30	1.871e-28	1
hsa-miR-222-3p	TOX	1	0.000189126	51	51	0.104348	3.728e-30	1.901e-28	1
hsa-miR-548d-5p	MORC3	0.955	58.4189	59	59	0.004201	3.379e-30	1.994e-28	1
hsa-miR-27b-3p	NFIL3	1	0.000189126	136	136	0.066121	1.485e-30	2.02e-28	1
hsa-let-7a-2-3p	HOXA1	1	0.000189126	67	67	0.081656	3.019e-30	2.023e-28	1
hsa-miR-320c	PLAGL1	0.841	74.2878	234	234	0.057255	8.86e-31	2.073e-28	1
hsa-miR-3689a-5p	POU2F2	0.69	86.3239	65	65	0.009116	3.4e-30	2.21e-28	1
hsa-miR-206	ID4	0.996	40.3642	58	58	0.166389	3.887e-30	2.254e-28	1
hsa-miR-514b-5p	PHF21B	0.781	79.5059	161	161	0.064823	1.428e-30	2.299e-28	1
hsa-miR-424-5p	MEOX2	0.846	73.8342	163	163	0.070034	1.426e-30	2.324e-28	1
hsa-miR-199a-3p	DLX5	1	0.000189126	38	38	0.117173	6.32e-30	2.402e-28	1
hsa-miR-199b-3p	DLX5	1	0.000189126	38	38	0.117198	6.32e-30	2.402e-28	1
hsa-miR-889	ZEB2	0.999	30.3054	312	312	0.05807	7.747e-31	2.417e-28	1
hsa-miR-139-5p	NR5A2	0.991	45.6945	30	30	0.126259	8.071e-30	2.421e-28	1
hsa-miR-199b-5p	BNC1	0.901	67.5479	64	64	0.080883	3.813e-30	2.44e-28	1
hsa-miR-548k	ZNF367	1	0.000189126	93	93	0.071689	2.669e-30	2.482e-28	1
hsa-let-7f-1-3p	BNC1	0.977	52.3486	64	64	0.085459	3.897e-30	2.494e-28	1
hsa-miR-494	EN2	0.999	30.3054	77	77	0.08763	3.262e-30	2.512e-28	1
hsa-miR-873-5p	ZC3H12C	1	0.000189126	98	98	0.059911	2.719e-30	2.665e-28	1
hsa-miR-1	LHX6	0.999	30.3054	39	39	0.103027	7.156e-30	2.791e-28	1
hsa-miR-130a-5p	FOXQ1	0.649	89.602	64	64	0.101387	4.578e-30	2.93e-28	1
hsa-miR-222-3p	ZSWIM4	0.676	87.9604	133	133	0.097305	2.292e-30	3.048e-28	1
hsa-miR-96-5p	LDB2	0.999	30.3054	220	220	0.06208	1.431e-30	3.148e-28	1
hsa-miR-301a-3p	ZEB1	0.541	97.0061	385	385	0.077686	8.274e-31	3.185e-28	1
hsa-miR-25-3p	E2F3	1	0.000189126	119	119	0.081119	2.701e-30	3.214e-28	1
hsa-miR-18a-3p	KLF5	0.976	52.641	70	70	0.156581	4.832e-30	3.382e-28	1
hsa-miR-106a-5p	TCF7L1	0.984	49.3046	132	132	0.113439	2.623e-30	3.462e-28	1
hsa-miR-494	GLIS3	1	0.000189126	112	112	0.065091	3.109e-30	3.482e-28	1
hsa-miR-20a-5p	ZNF367	0.999	30.3054	93	93	0.111593	3.795e-30	3.529e-28	1
hsa-miR-106b-5p	AFF4	0.999	30.3054	244	244	0.076352	1.546e-30	3.772e-28	1
hsa-let-7b-3p	GATA3	1	0.000189126	342	342	0.064214	1.109e-30	3.793e-28	1
hsa-miR-767-5p	NMI	0.98	51.2666	86	86	0.197039	4.45e-30	3.827e-28	1
hsa-miR-3622a-5p	NFIL3	0.996	40.3642	136	136	0.054789	3.001e-30	4.081e-28	1
hsa-miR-1276	ZNF462	0.808	77.4849	100	100	0.087595	4.117e-30	4.117e-28	1
hsa-miR-323a-3p	ZEB1	0.837	74.6204	385	385	0.067741	1.115e-30	4.293e-28	1
hsa-miR-9-3p	CEBPG	0.97	54.8638	85	85	0.138957	5.08e-30	4.318e-28	1
hsa-miR-200c-3p	RUNX1T1	0.993	43.8171	123	123	0.067127	3.963e-30	4.874e-28	1
hsa-miR-30a-3p	BCL11A	0.999	30.3054	197	197	0.065438	2.5e-30	4.925e-28	1
hsa-miR-452-5p	SOX8	0.992	44.957	57	57	0.183377	8.733e-30	4.978e-28	1
hsa-miR-30a-5p	MEOX2	1	0.000189126	163	163	0.060641	3.091e-30	5.038e-28	1
hsa-miR-3934	ZNF367	1	0.000189126	93	93	0.079867	5.461e-30	5.079e-28	1
hsa-miR-136-5p	EYA4	0.743	82.7428	41	41	0.085091	1.251e-29	5.129e-28	1
hsa-miR-3924	DEK	0.993	43.8171	190	190	0.003842	2.723e-30	5.174e-28	1
hsa-miR-382-5p	LMX1A	1	0.000189126	44	44	0.082646	1.181e-29	5.196e-28	1
hsa-miR-106b-5p	E2F1	1	0.000189126	136	136	0.108541	4.1e-30	5.576e-28	1
hsa-miR-548a-3p	BACH2	1	0.000189126	142	142	0.014954	3.927e-30	5.576e-28	1
hsa-miR-580	YBX1	1	0.000189126	204	204	0.064889	2.818e-30	5.749e-28	1
hsa-miR-34c-5p	BCL11A	1	0.000189126	197	197	0.097573	2.947e-30	5.806e-28	1
hsa-miR-28-3p	YBX1	0.994	42.9842	204	204	0.078084	2.868e-30	5.851e-28	1
hsa-miR-135b-5p	MLLT10	0.901	67.5479	76	76	0.171804	7.702e-30	5.854e-28	1
hsa-miR-130b-3p	MKL2	0.743	82.7428	223	223	0.079741	2.635e-30	5.876e-28	1
hsa-miR-487b	TBX15	0.676	87.9604	35	35	0.105176	1.691e-29	5.918e-28	1
hsa-miR-374a-5p	ANKRA2	1	0.000189126	205	205	0.05738	2.964e-30	6.076e-28	1
hsa-let-7f-1-3p	EN2	0.988	47.4918	77	77	0.071293	7.92e-30	6.098e-28	1
hsa-miR-944	ETS2	1	0.000189126	54	54	0.083902	1.179e-29	6.367e-28	1
hsa-miR-379-5p	ETV5	0.802	77.9487	128	128	0.074512	5.484e-30	7.02e-28	1
hsa-miR-1264	E2F8	0.88	69.9515	103	103	0.003241	6.821e-30	7.026e-28	1
hsa-miR-592	PPARG	0.994	42.9842	126	126	0.074748	5.691e-30	7.171e-28	1
hsa-miR-31-5p	IRX1	0.931	63.0711	71	71	0.102353	1.013e-29	7.192e-28	1
hsa-miR-30a-5p	BCL11A	0.565	95.534	197	197	0.069748	3.722e-30	7.332e-28	1
hsa-miR-18a-5p	CREBL2	0.999	30.3054	163	163	0.112786	4.789e-30	7.806e-28	1
hsa-miR-185-5p	ESR1	0.567	95.4146	267	267	0.069242	2.98e-30	7.957e-28	1
hsa-miR-376a-3p	EBF3	1	0.000189126	79	79	0.063786	1.023e-29	8.082e-28	1
hsa-miR-454-5p	HMGB2	0.797	78.3199	58	58	0.078841	1.429e-29	8.288e-28	1
hsa-miR-17-5p	KLF11	0.999	30.3054	124	124	0.113524	6.769e-30	8.394e-28	1
hsa-miR-1264	ZNF462	0.979	51.6176	100	100	0.003764	8.682e-30	8.682e-28	1
hsa-miR-200a-3p	BACH2	0.981	50.9165	142	142	0.075505	6.123e-30	8.695e-28	1
hsa-miR-10b-5p	GATA3	1	0.000189126	342	342	0.05964	2.593e-30	8.868e-28	1
hsa-miR-196b-5p	HOXA1	0.995	41.8528	67	67	0.101557	1.363e-29	9.132e-28	1
hsa-miR-942	ZNF552	1	0.000189126	89	89	0.096418	1.028e-29	9.149e-28	1
hsa-miR-922	SOX11	0.997	38.6214	120	120	0.012655	7.675e-30	9.21e-28	1
hsa-miR-944	RUNX1T1	0.59	94.0168	123	123	0.07801	7.592e-30	9.338e-28	1
hsa-let-7a-3p	ALX4	1	0.000189126	102	102	0.074935	9.431e-30	9.62e-28	1
hsa-miR-107	BCL11A	0.998	35.422	197	197	0.059277	5.036e-30	9.921e-28	1
hsa-miR-450b-5p	EBF3	1	0.000189126	79	79	0.067901	1.275e-29	1.007e-27	1
hsa-miR-30e-5p	BNC1	1	0.000189126	64	64	0.105282	1.688e-29	1.08e-27	1
hsa-miR-9-3p	KLF5	0.997	38.6214	70	70	0.16722	1.571e-29	1.1e-27	1
hsa-miR-130a-3p	TP63	1	0.000189126	117	117	0.081819	9.541e-30	1.116e-27	1
hsa-miR-139-5p	PRDM16	0.705	85.2652	39	39	0.13903	2.88e-29	1.123e-27	1
hsa-miR-539-5p	ZEB2	0.844	74.0067	312	312	0.059364	3.742e-30	1.168e-27	1
hsa-miR-526b-5p	ZNF462	1	0.000189126	100	100	0.118315	1.195e-29	1.195e-27	1
hsa-miR-9-5p	KLF5	0.985	48.8707	70	70	0.169697	1.711e-29	1.198e-27	1
hsa-miR-3680-3p	EZH2	0.99	46.3194	100	100	0.067258	1.2e-29	1.2e-27	1
hsa-miR-299-5p	HAND2	1	0.000189126	47	47	0.080409	2.592e-29	1.218e-27	1
hsa-miR-138-5p	HMGA1	0.97	54.8638	79	79	0.116571	1.593e-29	1.258e-27	1
hsa-miR-195-3p	EBF3	1	0.000189126	79	79	0.069416	1.597e-29	1.262e-27	1
hsa-miR-34c-3p	LDB2	1	0.000189126	220	220	0.084303	6.098e-30	1.342e-27	1
hsa-miR-30b-5p	ZNF706	1	0.000189126	79	79	0.096117	1.703e-29	1.345e-27	1
hsa-miR-376b	BARX1	1	0.000189126	71	71	0.072149	1.898e-29	1.348e-27	1
hsa-miR-379-5p	ID4	1	0.000189126	58	58	0.101861	2.37e-29	1.375e-27	1
hsa-miR-381	RUNX2	0.905	67.048	81	81	0.087386	1.709e-29	1.384e-27	1
hsa-miR-3121-3p	LDB2	0.97	54.8638	220	220	0.032439	6.406e-30	1.409e-27	1
hsa-miR-432-5p	ID4	0.945	60.3862	58	58	0.0966	2.573e-29	1.492e-27	1
hsa-miR-224-5p	FOXQ1	0.648	89.6673	64	64	0.174018	2.356e-29	1.508e-27	1
hsa-miR-3910	EBF1	1	0.000189126	232	232	0.059292	6.601e-30	1.531e-27	1
hsa-miR-369-3p	HAND2	1	0.000189126	47	47	0.074542	3.301e-29	1.551e-27	1
hsa-miR-645	REST	0.998	35.422	145	145	0.005588	1.098e-29	1.592e-27	1
hsa-miR-892b	FLI1	1	0.000189126	273	273	0.01972	6.046e-30	1.651e-27	1
hsa-miR-3667-5p	ST18	0.997	38.6214	70	70	0.079844	2.401e-29	1.681e-27	1
hsa-miR-578	LDB2	0.993	43.8171	220	220	0.048188	8.158e-30	1.795e-27	1
hsa-miR-548u	CREB1	0.512	99.2651	181	181	0.0023	1.01e-29	1.828e-27	1
hsa-miR-383	ID4	1	0.000189126	58	58	0.133942	3.259e-29	1.89e-27	1
hsa-miR-125b-5p	MEIS2	1	0.000189126	25	25	0.127979	7.899e-29	1.975e-27	1
hsa-miR-499a-5p	TSHZ2	1	0.000189126	198	198	0.059119	1.042e-29	2.063e-27	1
hsa-miR-3613-3p	EBF1	0.992	44.957	232	232	0.04935	8.92e-30	2.069e-27	1
hsa-miR-190a	KLF15	0.796	78.4065	104	104	0.072077	1.998e-29	2.078e-27	1
hsa-miR-877-5p	ZNF462	0.946	60.1907	100	100	0.103708	2.121e-29	2.121e-27	1
hsa-miR-18a-5p	ZBTB4	0.944	60.5676	185	185	0.119593	1.152e-29	2.131e-27	1
hsa-miR-424-3p	EBF1	1	0.000189126	232	232	0.063355	9.237e-30	2.143e-27	1
hsa-miR-548b-5p	SOX8	0.795	78.4758	57	57	0.101617	3.924e-29	2.237e-27	1
hsa-miR-934	CSDA	0.822	76.4044	103	103	0.228911	2.233e-29	2.3e-27	1
hsa-miR-140-5p	BMP2	1	0.000189126	81	81	0.099185	2.89e-29	2.341e-27	1
hsa-miR-665	SNAI2	0.635	90.4646	66	66	0.061665	3.557e-29	2.348e-27	1
hsa-miR-431-3p	DLX5	0.999	30.3054	38	38	0.109693	6.31e-29	2.398e-27	1
hsa-miR-183-3p	PHF21B	0.999	30.3054	161	161	0.069946	1.506e-29	2.425e-27	1
hsa-miR-154-3p	FOXQ1	1	0.000189126	64	64	0.065432	3.802e-29	2.433e-27	1
hsa-miR-142-5p	BCL11B	0.983	50.1019	36	36	0.23638	6.885e-29	2.479e-27	1
hsa-miR-3914	ZNF532	1	0.000189126	99	99	0.056759	2.611e-29	2.585e-27	1
hsa-miR-302d-3p	ZBTB6	0.621	91.328	96	96	0.008401	2.819e-29	2.706e-27	1
hsa-miR-193a-5p	PPARG	0.645	89.8562	126	126	0.078137	2.164e-29	2.727e-27	1
hsa-miR-200b-3p	ETV5	1	0.000189126	128	128	0.071284	2.189e-29	2.802e-27	1
hsa-let-7f-1-3p	ALX4	0.946	60.1907	102	102	0.068633	2.762e-29	2.817e-27	1
hsa-miR-369-5p	WWTR1	1	0.000189126	226	226	0.06119	1.249e-29	2.823e-27	1
hsa-miR-3675-5p	DMRT2	0.966	55.8939	47	47	0.034614	6.094e-29	2.864e-27	1
hsa-miR-500a-5p	NFIL3	0.97	54.8638	136	136	0.107093	2.124e-29	2.889e-27	1
hsa-miR-505-5p	ZDHHC18	0.637	90.3514	119	119	0.107809	2.439e-29	2.902e-27	1
hsa-miR-3938	ZCCHC11	1	0.000189126	82	82	0.041463	3.619e-29	2.968e-27	1
hsa-miR-582-5p	FOXQ1	0.999	30.3054	64	64	0.126949	4.728e-29	3.026e-27	1
hsa-miR-541-3p	DMRT2	0.933	62.756	47	47	0.078365	6.523e-29	3.066e-27	1
hsa-miR-106a-5p	RUNX3	1	0.000189126	91	91	0.111722	3.384e-29	3.079e-27	1
hsa-miR-148b-5p	TSHZ3	1	0.000189126	190	190	0.066684	1.636e-29	3.108e-27	1
hsa-miR-3939	NFIL3	0.943	61.1064	136	136	0.065947	2.328e-29	3.166e-27	1
hsa-miR-323a-3p	FLI1	1	0.000189126	273	273	0.060966	1.164e-29	3.178e-27	1
hsa-miR-4312	POLR2D	0.707	85.1356	148	148	0.005656	2.282e-29	3.377e-27	1
hsa-miR-582-5p	KCMF1	0.651	89.4744	235	235	0.086184	1.488e-29	3.497e-27	1
hsa-miR-2114-3p	DACH2	1	0.000189126	88	88	0.085569	4.02e-29	3.538e-27	1
hsa-miR-29c-3p	BTG2	1	0.000189126	133	133	0.079129	2.778e-29	3.695e-27	1
hsa-miR-1290	GTF3C2	0.95	59.4113	92	92	0.030575	4.094e-29	3.766e-27	1
hsa-miR-29a-3p	FOXA1	1	0.000189126	479	479	0.062128	7.904e-30	3.786e-27	1
hsa-miR-548d-5p	GTF2H1	0.998	35.422	65	65	0.004896	6.117e-29	3.976e-27	1
hsa-miR-31-5p	HOXA1	0.843	74.099	67	67	0.117263	5.976e-29	4.004e-27	1
hsa-miR-520c-3p	ZNF462	0.736	83.2039	100	100	0.035561	4.018e-29	4.018e-27	1
hsa-miR-1263	PLAGL1	0.9	67.6685	234	234	0.007413	1.803e-29	4.219e-27	1
hsa-miR-382-5p	EN2	1	0.000189126	77	77	0.074598	5.496e-29	4.232e-27	1
hsa-miR-200c-3p	BHLHE22	1	0.000189126	61	61	0.082297	6.957e-29	4.244e-27	1
hsa-miR-1261	MKL2	0.799	78.1756	223	223	0.00247	2.007e-29	4.476e-27	1
hsa-miR-212-3p	FOXA1	0.947	60.0144	479	479	0.053542	9.487e-30	4.544e-27	1
hsa-miR-154-5p	ID4	0.957	57.9431	58	58	0.075817	8.275e-29	4.8e-27	1
hsa-miR-642b-3p	PHF21B	0.761	81.5593	161	161	0.066099	3.08e-29	4.959e-27	1
hsa-let-7d-5p	KCMF1	1	0.000189126	235	235	0.068544	2.161e-29	5.078e-27	1
hsa-miR-582-5p	NOTCH1	1	0.000189126	182	182	0.095682	2.803e-29	5.101e-27	1
hsa-miR-181c-5p	EN2	0.999	30.3054	77	77	0.09463	6.858e-29	5.281e-27	1
hsa-miR-130a-5p	PHF19	1	0.000189126	76	76	0.08627	7.174e-29	5.452e-27	1
hsa-miR-514b-5p	FOXC1	0.786	79.1438	406	406	0.060202	1.372e-29	5.57e-27	1
hsa-miR-16-1-3p	ZNF367	1	0.000189126	93	93	0.064936	6.03e-29	5.608e-27	1
hsa-miR-369-3p	EN2	0.999	30.3054	77	77	0.095002	7.583e-29	5.839e-27	1
hsa-miR-185-3p	EZH2	1	0.000189126	100	100	0.067705	5.89e-29	5.89e-27	1
hsa-miR-323a-3p	ZNF469	0.987	48	91	91	0.091694	6.907e-29	6.285e-27	1
hsa-let-7c	MEIS2	1	0.000189126	25	25	0.139043	2.521e-28	6.302e-27	1
hsa-miR-520a-3p	ZNF462	0.96	57.3267	100	100	0.109874	6.305e-29	6.305e-27	1
hsa-miR-342-5p	ZNF385A	0.962	56.8946	111	111	0.08205	6.127e-29	6.801e-27	1
hsa-miR-493-3p	HMGA2	0.889	68.9627	39	39	0.084938	1.783e-28	6.954e-27	1
hsa-miR-98	E2F2	0.873	71.3281	68	68	0.085439	1.037e-28	7.052e-27	1
hsa-miR-31-5p	ZDHHC18	0.835	74.7959	119	119	0.090561	6.182e-29	7.357e-27	1
hsa-miR-452-3p	CSDA	0.904	67.1655	103	103	0.136751	7.342e-29	7.562e-27	1
hsa-miR-130a-3p	EBF1	0.855	73.0233	232	232	0.074638	3.372e-29	7.823e-27	1
hsa-miR-9-3p	E2F7	1	0.000189126	67	67	0.144992	1.191e-28	7.98e-27	1
hsa-miR-519a-3p	FOXA1	0.995	41.8528	479	479	0.032128	1.689e-29	8.09e-27	1
hsa-let-7f-1-3p	ANKRD1	0.92	64.6001	98	98	0.060952	8.412e-29	8.244e-27	1
hsa-miR-374a-3p	MEOX2	1	0.000189126	163	163	0.055608	5.286e-29	8.616e-27	1
hsa-miR-520b	ZNF462	0.759	81.6835	100	100	0.039813	9.424e-29	9.424e-27	1
hsa-miR-100-5p	MEIS2	0.979	51.6176	25	25	0.141933	3.775e-28	9.437e-27	1
hsa-miR-92a-3p	MLLT10	0.999	30.3054	76	76	0.092971	1.289e-28	9.796e-27	1
hsa-miR-374a-5p	TOX	0.678	87.829	51	51	0.079857	1.927e-28	9.828e-27	1
hsa-miR-186-5p	FOXP1	0.998	35.422	127	127	0.08154	7.827e-29	9.94e-27	1
hsa-miR-496	TBX5	0.999	30.3054	57	57	0.089892	1.781e-28	1.015e-26	1
hsa-miR-375	ZNF462	1	0.000189126	100	100	0.080325	1.038e-28	1.038e-26	1
hsa-miR-103a-3p	TP63	1	0.000189126	117	117	0.064614	9.221e-29	1.079e-26	1
hsa-miR-142-3p	XBP1	0.601	93.314	243	243	0.081578	4.468e-29	1.086e-26	1
hsa-miR-377-3p	TOX	1	0.000189126	51	51	0.078278	2.195e-28	1.119e-26	1
hsa-miR-125b-5p	TAX1BP3	0.7	85.5948	186	186	0.05888	6.117e-29	1.138e-26	1
hsa-miR-93-5p	TCF7L1	0.999	30.3054	132	132	0.08564	8.697e-29	1.148e-26	1
hsa-miR-483-5p	DACH2	0.632	90.6473	88	88	0.081492	1.313e-28	1.155e-26	1
hsa-miR-654-5p	DMRT2	1	0.000189126	47	47	0.081049	2.473e-28	1.162e-26	1
hsa-miR-136-5p	BHLHE22	1	0.000189126	61	61	0.070941	2.01e-28	1.226e-26	1
hsa-miR-218-5p	MEF2C	1	0.000189126	76	76	0.064863	1.674e-28	1.272e-26	1
hsa-miR-3654	EN2	0.997	38.6214	77	77	0.108805	1.762e-28	1.357e-26	1
hsa-miR-9-5p	ZNF367	1	0.000189126	93	93	0.14863	1.462e-28	1.36e-26	1
hsa-miR-96-5p	ZEB1	0.996	40.3642	385	385	0.059629	3.557e-29	1.369e-26	1
hsa-miR-934	SCML2	0.874	71.2283	82	82	0.190033	1.686e-28	1.383e-26	1
hsa-miR-200c-3p	SNAI2	1	0.000189126	66	66	0.078037	2.208e-28	1.457e-26	1
hsa-miR-125b-2-3p	TCF4	0.985	48.8707	104	104	0.064356	1.488e-28	1.548e-26	1
hsa-miR-221-3p	FOXQ1	0.941	61.4501	64	64	0.115334	2.572e-28	1.646e-26	1
hsa-miR-656	RUNX1T1	0.842	74.1896	123	123	0.052554	1.363e-28	1.676e-26	1
hsa-miR-495	PITX2	0.999	30.3054	44	44	0.087519	3.933e-28	1.731e-26	1
hsa-miR-1248	TBX21	0.753	82.0854	163	163	0.083827	1.083e-28	1.765e-26	1
hsa-miR-3613-3p	SLC26A3	0.93	63.2023	117	117	0.058457	1.526e-28	1.785e-26	1
hsa-miR-222-3p	ETS1	0.992	44.957	147	147	0.09341	1.224e-28	1.799e-26	1
hsa-miR-93-5p	ESR1	0.65	89.5413	267	267	0.076127	6.978e-29	1.863e-26	1
hsa-miR-454-3p	SRSF2	1	0.000189126	78	78	0.076797	2.455e-28	1.915e-26	1
hsa-miR-30e-5p	AFF3	0.603	93.1973	256	256	0.061034	7.844e-29	2.008e-26	1
hsa-miR-301b	SCML2	1	0.000189126	82	82	0.107638	2.58e-28	2.116e-26	1
hsa-miR-125b-5p	IRF4	0.998	35.422	86	86	0.071503	2.554e-28	2.196e-26	1
hsa-miR-31-5p	ZC3H12C	0.993	43.8171	98	98	0.104768	2.262e-28	2.217e-26	1
hsa-miR-520e	TCF7L1	0.981	50.9165	132	132	0.066951	1.681e-28	2.219e-26	1
hsa-miR-33b-5p	EBF3	0.999	30.3054	79	79	0.081563	2.813e-28	2.222e-26	1
hsa-miR-137	L3MBTL4	0.927	63.6439	119	119	0.106846	1.878e-28	2.235e-26	1
hsa-miR-22-3p	ETV1	1	0.000189126	45	45	0.091708	5.324e-28	2.396e-26	1
hsa-miR-214-5p	ZIC4	0.702	85.4732	40	40	0.078759	6.177e-28	2.471e-26	1
hsa-let-7f-5p	HIF3A	1	0.000189126	58	58	0.076863	4.278e-28	2.481e-26	1
hsa-miR-382-5p	DLX5	1	0.000189126	38	38	0.126164	6.588e-28	2.503e-26	1
hsa-miR-3607-3p	EN2	0.997	38.6214	77	77	0.087986	3.332e-28	2.566e-26	1
hsa-miR-23b-3p	SOX11	1	0.000189126	120	120	0.076368	2.253e-28	2.704e-26	1
hsa-miR-656	EYA4	0.832	75.08	41	41	0.061789	6.728e-28	2.758e-26	1
hsa-miR-502-3p	AFF4	0.947	60.0144	244	244	0.067981	1.134e-28	2.767e-26	1
hsa-miR-335-5p	ZEB2	0.998	35.422	312	312	0.067438	8.929e-29	2.786e-26	1
hsa-miR-106b-5p	ESR1	0.997	38.6214	267	267	0.088334	1.044e-28	2.787e-26	1
hsa-miR-20b-3p	TBX21	0.968	55.3873	163	163	0.074949	1.741e-28	2.838e-26	1
hsa-miR-195-3p	LDB2	1	0.000189126	220	220	0.06555	1.315e-28	2.893e-26	1
hsa-miR-30e-5p	TOX	1	0.000189126	51	51	0.090353	6.051e-28	3.086e-26	1
hsa-miR-200b-3p	OSR1	1	0.000189126	113	113	0.067889	2.748e-28	3.105e-26	1
hsa-miR-374b-3p	YBX1	0.968	55.3873	204	204	0.051491	1.532e-28	3.125e-26	1
hsa-miR-2115-3p	BCL11A	0.993	43.8171	197	197	0.093456	1.593e-28	3.138e-26	1
hsa-miR-15b-5p	PLAGL1	0.904	67.1655	234	234	0.081028	1.343e-28	3.143e-26	1
hsa-miR-29a-3p	BCL11B	0.998	35.422	36	36	0.115072	8.755e-28	3.152e-26	1
hsa-miR-3674	ATRX	0.592	93.8944	134	134	0.002443	2.354e-28	3.154e-26	1
hsa-miR-340-5p	TP63	0.991	45.6945	117	117	0.066796	2.729e-28	3.193e-26	1
hsa-miR-93-5p	BTG2	0.8	78.0958	133	133	0.080399	2.418e-28	3.216e-26	1
hsa-miR-19a-3p	PTMA	0.916	65.1724	68	68	0.108711	4.827e-28	3.282e-26	1
hsa-miR-1267	MCM6	0.901	67.5479	139	139	0.047773	2.365e-28	3.287e-26	1
hsa-miR-135b-5p	ID4	0.716	84.5374	58	58	0.178057	5.674e-28	3.291e-26	1
hsa-miR-218-5p	L3MBTL4	1	0.000189126	119	119	0.064259	2.8e-28	3.332e-26	1
hsa-miR-96-5p	BNC2	0.909	66.5461	263	263	0.059801	1.315e-28	3.458e-26	1
hsa-miR-590-3p	TAF4B	0.56	95.837	170	170	0.081604	2.073e-28	3.524e-26	1
hsa-miR-340-5p	PPARG	0.998	35.422	126	126	0.070269	2.805e-28	3.534e-26	1
hsa-miR-934	NFIB	0.99	46.3194	66	66	0.23618	5.355e-28	3.534e-26	1
hsa-miR-582-5p	TOX	0.993	43.8171	51	51	0.10377	7.235e-28	3.69e-26	1
hsa-miR-154-3p	ZEB2	1	0.000189126	312	312	0.056318	1.199e-28	3.741e-26	1
hsa-miR-1304-5p	EZH2	0.999	30.3054	100	100	0.076123	3.802e-28	3.802e-26	1
hsa-miR-550a-3p	ZNF367	0.728	83.7268	93	93	0.086444	4.129e-28	3.84e-26	1
hsa-miR-18a-5p	CSDA	0.997	38.6214	103	103	0.146275	3.911e-28	4.028e-26	1
hsa-let-7g-3p	EBF1	0.973	53.614	232	232	0.05393	1.742e-28	4.041e-26	1
hsa-miR-200b-3p	RUNX1T1	1	0.000189126	123	123	0.07152	3.368e-28	4.143e-26	1
hsa-miR-125b-5p	BACH1	0.999	30.3054	129	129	0.062641	3.334e-28	4.301e-26	1
hsa-miR-548d-3p	TAF5	0.718	84.3956	72	72	0.10748	6.063e-28	4.365e-26	1
hsa-miR-199b-5p	EMX2	0.999	30.3054	20	20	0.141061	2.218e-27	4.436e-26	1
hsa-miR-520g	PLAGL1	0.895	68.2732	234	234	0.02795	1.935e-28	4.528e-26	1
hsa-miR-3675-3p	ZNF474	1	0.000189126	75	75	0.012044	6.254e-28	4.691e-26	1
hsa-miR-3938	ID4	1	0.000189126	58	58	0.042391	8.383e-28	4.862e-26	1
hsa-miR-655	EYA4	1	0.000189126	41	41	0.07699	1.197e-27	4.908e-26	1
hsa-miR-15a-5p	RUNX1T1	1	0.000189126	123	123	0.065404	4.161e-28	5.118e-26	1
[truncated: 121,834 more rows]

## Sheet: LINCS interactome (96H)
Perturbagen	Target	LogFC	Perturbagen Cutoff (|LogFC|)	Target Cutoff (|LogFC|)
AARS	AARS	-1.98025	1.49175	1.20466
AATF	CASK	1.50772	1.09061	1.31372
AATF	GABPB1	1.2997	1.09061	1.27434
AATF	HEBP1	-1.4809	1.09061	1.0538
AATF	HMG20B	-2.5748	1.09061	1.71552
AATF	LAMA3	1.66632	1.09061	1.6427
AATF	MACF1	1.17522	1.09061	1.1061
AATF	MAP3K4	2.14032	1.09061	1.18406
AATF	PCBD1	2.6102	1.09061	1.7115
AATF	SGCB	1.61958	1.09061	1.25397
AATF	SNX6	-1.34257	1.09061	1.25522
AATF	SYPL1	1.608	1.09061	1.59639
AATF	TIPARP	1.39255	1.09061	1.09034
ABAT	PPP3CA	-2.31182	2.15029	2.02147
ABCA3	DUSP11	-1.39835	1.19529	1.1247
ABCA3	EPRS	1.24275	1.19529	1.23912
ABCA3	GAPDH	1.3285	1.19529	1.28027
ABCA3	IER3	-2.6872	1.19529	1.97045
ABCA3	PRAF2	1.5007	1.19529	1.3967
ABCA3	S100A4	1.74048	1.19529	1.49591
ABCA3	TCEA2	-1.85975	1.19529	1.14273
ABCA3	THAP11	2.36995	1.19529	1.88461
ABCA3	UBE3B	-1.25335	1.19529	1.22895
ABCA3	XBP1	-1.7071	1.19529	1.6396
ABCA3	ZFP36	2.3993	1.19529	1.70612
ABCA5	ADCK3	1.5038	1.01471	1.25826
ABCA5	GALE	1.7003	1.01471	1.26792
ABCA5	GAPDH	1.3282	1.01471	1.28027
ABCA5	HDAC6	-1.3136	1.01471	1.29332
ABCA5	PRSS23	-1.8444	1.01471	1.64951
ABCA5	THAP11	2.20925	1.01471	1.88461
ABCA5	TIMM9	-2.081	1.01471	1.7176
ABCB7	DNMT1	1.7765	1.62701	1.56377
ABCB7	DNTTIP2	1.6568	1.62701	1.13932
ABCB7	FAT1	2.2882	1.62701	2.12536
ABCB7	H2AFV	2.07467	1.62701	1.3544
ABCB7	MSRA	1.8559	1.62701	1.56295
ABCB7	POLB	1.6361	1.62701	1.05748
ABCB7	RFNG	1.73325	1.62701	1.55813
ABCB7	RFX5	1.67292	1.62701	1.35541
ABCB7	RGS2	1.97005	1.62701	1.69539
ABCB7	TSN	2.9213	1.62701	2.43354
ABCB7	VAMP7	2.2134	1.62701	2.18011
ABCB7	VPS28	2.4958	1.62701	1.62433
ABCC1	BNIP3	-1.2188	0.843708	1.20031
ABCC1	DDIT4	1.9223	0.843708	1.72196
ABCC1	EGFR	-1.96046	0.843708	1.65427
ABCC1	KIAA0907	-1.09187	0.843708	1.01788
ABCC1	MALT1	-1.80693	0.843708	1.40905
ABCC1	NOLC1	-1.5024	0.843708	1.41876
ABCC1	POLR2I	-1.1223	0.843708	1.09246
ABCC1	SNRPD1	-2.0507	0.843708	1.9308
ABCC1	SNX13	-1.46307	0.843708	1.38909
ABCC1	TSN	2.4751	0.843708	2.43354
ABCC1	VPS28	1.9435	0.843708	1.62433
ABCC10	ACBD3	1.57895	0.964527	1.42511
ABCC10	CSNK2A2	-1.63897	0.964527	1.54975
ABCC10	IER3	-2.4203	0.964527	1.97045
ABCC10	MALT1	-2.13667	0.964527	1.40905
ABCC10	PNP	-1.5358	0.964527	1.32791
ABCC3	BNIP3	-1.25607	1.09135	1.20031
ABCC3	CBR3	-1.2543	1.09135	1.15633
ABCC3	CSNK2A2	-1.66783	1.09135	1.54975
ABCC3	EGFR	-1.94166	1.09135	1.65427
ABCC3	HSD17B11	1.26937	1.09135	1.22499
ABCC3	MALT1	-2.12173	1.09135	1.40905
ABCC3	MPZL1	-1.3692	1.09135	1.19558
ABCC3	MTFR1	-1.2694	1.09135	1.11554
ABCC3	NUP133	-1.3719	1.09135	1.2553
ABCC3	PCBD1	-1.9901	1.09135	1.7115
ABCC3	PDS5A	-1.20587	1.09135	1.08739
ABCC3	PGRMC1	-1.5912	1.09135	1.34355
ABCC3	SLC1A4	-1.3113	1.09135	1.22917
ABCC3	SPAG4	-1.23454	1.09135	1.03126
ABCC4	BECN1	-1.28937	0.984608	1.22052
ABCC4	BHLHE40	2.23042	0.984608	1.86956
ABCC4	CETN3	-1.5121	0.984608	1.07928
ABCC4	CSNK2A2	-1.89337	0.984608	1.54975
ABCC4	DTNA	2.62097	0.984608	2.46868
ABCC4	EBNA1BP2	-1.9773	0.984608	1.38835
ABCC4	EXT1	-1.7153	0.984608	1.67651
ABCC4	FEZ2	1.16827	0.984608	1.11478
ABCC4	GDPD5	-1.56657	0.984608	1.3469
ABCC4	GLOD4	-1.4106	0.984608	1.39323
ABCC4	GNAI2	-1.00211	0.984608	0.962519
ABCC4	HK1	-1.36223	0.984608	1.26821
ABCC4	IARS2	-1.83857	0.984608	1.35742
ABCC4	KIAA1033	1.24926	0.984608	1.12852
ABCC4	LOXL1	-1.82983	0.984608	1.35703
ABCC4	LYN	-1.75845	0.984608	1.62507
ABCC4	MALT1	-2.1472	0.984608	1.40905
ABCC4	MEST	-1.4763	0.984608	1.37726
ABCC4	NCAPD2	-1.4817	0.984608	1.32274
ABCC4	OXA1L	-2.3358	0.984608	1.57779
ABCC4	PAFAH1B1	-1.5044	0.984608	0.930944
ABCC4	PCCB	-1.5872	0.984608	1.49233
ABCC4	PLSCR1	-1.15637	0.984608	1.12543
ABCC4	RBM15B	-1.3344	0.984608	1.133
ABCC4	TM9SF2	-1.79873	0.984608	1.0288
ABCC5	AURKA	-1.46427	1.08548	1.29787
ABCC5	BIRC2	-1.16438	1.08548	0.826501
ABCC5	CHEK1	-1.9797	1.08548	1.81518
ABCC5	GPATCH8	1.20741	1.08548	1.15253
ABCC5	HIST1H2BD	-2.929	1.08548	2.55887
ABCC5	NFKBIA	1.65269	1.08548	1.41764
ABCC5	TFDP1	-1.71717	1.08548	1.32409
ABCD3	CASP3	1.4464	1.08191	1.40138
ABCD3	ETS2	-2.90986	1.08191	2.62272
ABCD3	GAPDH	1.3285	1.08191	1.28027
ABCD3	HN1L	1.7086	1.08191	1.52693
ABCD3	NIT1	1.74672	1.08191	1.57474
ABCD3	OXA1L	-1.6505	1.08191	1.57779
ABCD3	PCM1	-1.09099	1.08191	1.06841
ABCD3	RSU1	1.32585	1.08191	1.26409
ABCD3	THAP11	2.35835	1.08191	1.88461
ABCD3	USP7	1.55136	1.08191	1.50071
ABCF1	CHMP4A	-1.45217	1.05163	1.13729
ABCF1	CNPY3	1.42197	1.05163	1.41671
ABCF1	CXCL2	-1.47503	1.05163	1.21619
ABCF1	PDHX	-1.32428	1.05163	1.24645
ABCF1	RAD51C	-1.15133	1.05163	1.09198
ABCF1	RPIA	-2.65917	1.05163	1.46433
ABCF1	ST3GAL5	3.32435	1.05163	1.89811
ABCF1	STAT1	1.93092	1.05163	1.6313
ABCF1	TNIP1	-2.12434	1.05163	1.57656
ABCF1	TUBB6	-1.65597	1.05163	1.35669
ABCF1	UTP14A	-1.58633	1.05163	1.21376
ABCF2	ADH5	-1.487	1.15878	1.27183
ABCF2	FKBP4	-1.6215	1.15878	1.47562
ABCF2	FUT1	1.66619	1.15878	1.51174
ABCF2	GAPDH	1.3281	1.15878	1.28027
ABCF2	HEBP1	1.67005	1.15878	1.0538
ABCF2	PCCB	-1.5468	1.15878	1.49233
ABCF2	SACM1L	1.28079	1.15878	1.13855
ABCF2	THAP11	2.23715	1.15878	1.88461
ABCF2	UFM1	-1.8317	1.15878	1.43249
ABCF3	ATP5S	-2.1175	1.0004	0.899262
ABCF3	CD320	-1.50697	1.0004	1.50159
ABCF3	CD58	-1.36082	1.0004	1.32345
ABCF3	CLTC	-3.17323	1.0004	3.11268
ABCF3	CREB1	1.04298	1.0004	0.944198
ABCF3	CTNNAL1	-1.1487	1.0004	1.03212
ABCF3	DNAJC15	-1.95617	1.0004	1.13721
ABCF3	ETS1	1.06119	1.0004	1.04246
ABCF3	IKZF1	3.71708	1.0004	3.23283
ABCF3	LGALS8	1.06565	1.0004	1.05134
ABCF3	MAT2A	-2.3153	1.0004	2.28867
ABCF3	MPZL1	1.26998	1.0004	1.19558
ABCF3	SGCB	1.30209	1.0004	1.25397
ABCF3	TMEM110	-1.65915	1.0004	1.32583
ABCG2	ARFIP2	-1.27187	1.11501	1.07266
ABCG2	ARL4C	2.1535	1.11501	1.95279
ABCG2	CSNK2A2	1.63083	1.11501	1.54975
ABCG2	DMTF1	1.2145	1.11501	0.958021
ABCG2	ELAVL1	-1.41942	1.11501	1.16691
ABCG2	EZH2	-1.5051	1.11501	1.44881
ABCG2	JUN	1.9855	1.11501	1.90057
ABCG2	MAPK1IP1L	2.7917	1.11501	1.66493
ABCG2	PCBD1	2.6888	1.11501	1.7115
ABCG2	PRKCD	-1.31133	1.11501	1.25387
ABCG2	RRP8	-2.10115	1.11501	1.16519
ABCG2	SCARB1	-1.55	1.11501	1.15294
ABCG2	SYPL1	1.6413	1.11501	1.59639
ABCG2	TERF2IP	1.7885	1.11501	1.71159
ABHD4	CCNB2	-2.3231	1.01419	2.15591
ABHD4	DFFA	1.18905	1.01419	1.1706
ABHD4	EXOSC4	-1.37828	1.01419	1.24222
ABHD4	HOMER2	-1.4927	1.01419	1.27221
ABHD4	HOOK2	-1.2066	1.01419	1.16111
ABHD4	NOSIP	-1.08106	1.01419	1.04873
ABHD4	PAPD7	1.6066	1.01419	0.915037
ABHD4	PIGB	-1.50393	1.01419	0.933447
ABHD6	AMDHD2	1.74052	1.01177	1.42483
ABHD6	C5	1.03348	1.01177	0.853077
ABHD6	CD320	-1.57447	1.01177	1.50159
ABHD6	CDK19	-1.21267	1.01177	1.19556
ABHD6	DDR1	1.23947	1.01177	1.08382
ABHD6	DNAJC15	-1.1559	1.01177	1.13721
ABHD6	DUSP4	-1.67175	1.01177	1.30866
ABHD6	FYN	-1.05327	1.01177	0.880051
ABHD6	GTF2A2	-1.32235	1.01177	1.12231
ABHD6	INTS3	1.38064	1.01177	1.22194
ABHD6	MUC1	1.69322	1.01177	1.51542
ABHD6	MYO10	1.37487	1.01177	1.2792
ABHD6	NPRL2	-1.80272	1.01177	1.1578
ABHD6	SLC35F2	-1.08227	1.01177	1.03869
ABL1	SHC1	1.51667	0.807052	1.32909
ABL2	ABCC5	1.94767	1.87222	1.60642
ABL2	ALMS1	2.89267	1.87222	1.73388
ABL2	ARHGEF2	1.9098	1.87222	1.4072
ABL2	ARNT2	2.2141	1.87222	1.9532
ABL2	BTG2	3.2251	1.87222	3.05852
ABL2	BUB1B	2.5853	1.87222	1.36437
ABL2	CD44	2.38923	1.87222	2.07205
ABL2	EDEM1	1.9189	1.87222	1.56262
ABL2	EXT1	1.8866	1.87222	1.67651
ABL2	H2AFV	2.27758	1.87222	1.3544
ABL2	HYOU1	2.0759	1.87222	1.58024
ABL2	IGF2R	2.0251	1.87222	1.72865
ABL2	LRP10	2.0786	1.87222	1.76525
ABL2	LRRC41	1.9672	1.87222	1.4754
ABL2	PDS5B	2.22023	1.87222	1.83598
ABL2	RFNG	1.87692	1.87222	1.55813
ABL2	STK10	2.6342	1.87222	1.56769
ABL2	SUPV3L1	2.3185	1.87222	1.67739
ABL2	TFAP2A	2.0336	1.87222	1.6898
ABL2	TIMM9	1.8874	1.87222	1.7176
ABL2	TXNL4B	1.99543	1.87222	1.16449
ABL2	ZNF395	2.32365	1.87222	1.69737
ACAA1	AURKB	2.04745	1.01458	1.08667
ACAA1	BAX	-1.5732	1.01458	1.42078
ACAA1	CASP10	1.67133	1.01458	1.14797
ACAA1	CCND1	-1.16396	1.01458	0.801934
ACAA1	CCP110	-1.58667	1.01458	1.54804
ACAA1	CDC25A	-2.0678	1.01458	1.28884
ACAA1	CDK4	-1.4343	1.01458	1.32981
ACAA1	COG2	-1.45887	1.01458	1.37389
ACAA1	DDIT4	1.93932	1.01458	1.72196
ACAA1	DFFA	1.24148	1.01458	1.1706
ACAA1	ETS1	1.20918	1.01458	1.04246
ACAA1	FGFR2	1.90785	1.01458	1.27416
ACAA1	HSPA1A	1.2585	1.01458	1.23799
ACAA1	IFNAR1	1.40062	1.01458	1.23987
ACAA1	IL1B	1.57805	1.01458	0.988672
ACAA1	MMP2	1.41075	1.01458	1.3153
ACAA1	PIK3CA	1.85553	1.01458	1.5021
ACAA1	TRIM2	1.40553	1.01458	1.35489
ACADM	BAZ2B	2.20683	1.73404	1.91888
ACADM	BCL2	1.84315	1.73404	1.14472
ACADM	BDH1	-2.17203	1.73404	1.53934
ACADM	C2CD2	1.89804	1.73404	1.39145
ACADM	CD97	1.81407	1.73404	1.37815
ACADM	CERK	2.12687	1.73404	1.38998
ACADM	ETS2	2.96245	1.73404	2.62272
ACADM	FAS	1.78157	1.73404	1.43124
ACADM	GPRC5C	2.19285	1.73404	1.86816
ACADM	GYS1	2.68232	1.73404	1.97557
ACADM	H2AFV	2.13793	1.73404	1.3544
ACADM	HIST2H2BE	2.4531	1.73404	1.87641
ACADM	HTATSF1	-2.1958	1.73404	1.18656
ACADM	IGF2R	1.876	1.73404	1.72865
ACADM	LPAR2	1.766	1.73404	1.19795
ACADM	MRPL12	-2.047	1.73404	1.42131
ACADM	MVP	1.9946	1.73404	1.98196
ACADM	NFIL3	1.96737	1.73404	1.63097
ACADM	NIPSNAP1	-1.8716	1.73404	1.17518
ACADM	PDIA5	1.78637	1.73404	1.03971
ACADM	POP4	-1.96187	1.73404	1.34727
ACADM	QRSL1	1.8906	1.73404	1.8853
ACADM	SLC35A1	-2.79147	1.73404	1.3257
ACADM	SOCS2	1.76285	1.73404	1.6483
ACADM	STX1A	2.4435	1.73404	2.25589
ACADM	STX4	-1.79767	1.73404	1.14185
ACADM	THAP11	-2.9393	1.73404	1.88461
ACADM	TMEM110	1.76362	1.73404	1.32583
ACADM	TNFAIP1	2.5028	1.73404	2.13124
ACADM	TOP2A	-2.6583	1.73404	2.3385
ACADM	TRAM2	2.25933	1.73404	1.14885
ACADM	TSPAN4	-1.86483	1.73404	1.57424
ACADM	VPS28	2.6204	1.73404	1.62433
ACADM	VPS72	-2.17893	1.73404	1.12835
ACADM	ZNF318	2.65348	1.73404	1.46295
ACAT1	ADCY9	2.05169	1.24468	1.85251
ACAT1	BAZ2B	2.43255	1.24468	1.91888
ACAT1	BHLHE40	2.89628	1.24468	1.86956
ACAT1	ENOSF1	1.24825	1.24468	1.15893
ACAT1	EPRS	1.42805	1.24468	1.23912
ACAT1	GAPDH	1.3282	1.24468	1.28027
ACAT1	HMG20B	-2.3986	1.24468	1.71552
ACAT1	IFRD2	-2.0747	1.24468	1.69534
ACAT1	KIF2C	-1.64383	1.24468	1.47296
ACAT1	LAMA3	1.9296	1.24468	1.6427
ACAT1	MACF1	1.47364	1.24468	1.1061
ACAT1	MAP3K4	2.60666	1.24468	1.18406
ACAT1	PEX19	2.45139	1.24468	1.8047
ACAT1	PRKCD	-1.26668	1.24468	1.25387
ACAT1	RFX5	1.37074	1.24468	1.35541
ACAT1	RPL39L	-1.46488	1.24468	1.41474
ACAT1	SLC5A6	1.4484	1.24468	1.24537
ACAT1	ST7	1.81133	1.24468	1.04572
ACAT1	STAT1	1.91672	1.24468	1.6313
ACAT1	TSTA3	-1.53093	1.24468	1.03136
ACAT2	ACAT2	-2.5324	0.972008	1.33524
ACAT2	ATMIN	1.17002	0.972008	1.0747
ACAT2	BRCA1	-1.59528	0.972008	1.32819
ACAT2	CDC25B	-1.4126	0.972008	1.34968
ACAT2	CDK1	-1.95598	0.972008	1.85058
ACAT2	DLD	-1.1821	0.972008	1.01275
ACAT2	EZH2	-1.59713	0.972008	1.44881
ACAT2	HMGCS1	1.69405	0.972008	1.51038
ACAT2	HSPD1	-1.25673	0.972008	1.04674
ACAT2	NOTCH1	2.28022	0.972008	1.45928
ACAT2	POLE2	-2.22062	0.972008	2.02572
ACAT2	POP4	-1.34852	0.972008	1.34727
ACAT2	PSME1	-1.10077	0.972008	0.635213
ACAT2	RHOA	-1.10887	0.972008	0.994791
ACBD3	ABAT	-4.69693	4.63629	1.97996
ACBD3	ASAP2	-5.37717	4.63629	2.10955
ACBD3	CA12	-4.69767	4.63629	2.34273
ACBD3	CLASRP	-5.37717	4.63629	2.10955
ACBD3	CMPK1	-4.72497	4.63629	2.18941
ACBD3	CTCF	-4.76483	4.63629	2.06148
ACBD3	EIF1B	-5.78183	4.63629	2.23137
ACBD3	ETFA	-4.78667	4.63629	2.01208
ACBD3	FAM3C	-5.7641	4.63629	2.84692
ACBD3	FDX1	-4.79423	4.63629	2.06995
ACBD3	GPR125	-4.7323	4.63629	2.09865
ACBD3	GRHPR	-4.73267	4.63629	2.1155
ACBD3	HIST1H2BD	-5.2054	4.63629	2.55887
ACBD3	LYPD3	-5.56267	4.63629	2.44997
ACBD3	MGST2	-5.28987	4.63629	2.43818
ACBD3	PPIF	-4.78663	4.63629	2.51
ACBD3	RAD23B	-5.4144	4.63629	2.20874
ACBD3	RTCD1	-5.58247	4.63629	2.40789
ACBD3	SEC14L1	-5.76863	4.63629	2.28595
ACBD3	SFMBT1	-5.7246	4.63629	2.49987
ACBD3	STAT6	-5.15573	4.63629	2.01698
ACBD3	TCIRG1	-5.0799	4.63629	2.01824
ACBD3	TOMM22	-4.9173	4.63629	1.92524
ACBD3	UGP2	-6.06133	4.63629	2.37623
ACD	ADRB2	-1.34949	0.987139	1.33973
ACD	CTTN	1.53168	0.987139	1.35525
ACD	HOOK2	1.2276	0.987139	1.16111
ACD	MMP1	-1.45955	0.987139	1.15676
ACD	MYL9	1.60025	0.987139	1.45919
ACD	PTPN12	1.1368	0.987139	1.06406
ACD	SCP2	1.56623	0.987139	1.29219
ACD	TBC1D9B	1.71597	0.987139	1.52448
ACD	TEX10	-2.0355	0.987139	1.27962
ACD	TMEM110	-1.75158	0.987139	1.32583
ACLY	ACAT2	1.3728	1.09568	1.33524
ACLY	ACLY	-1.70121	1.09568	1.0762
ACLY	AURKB	1.73755	1.09568	1.08667
ACLY	CASP10	1.16197	1.09568	1.14797
ACLY	CASP2	-1.2413	1.09568	1.2298
ACLY	CD14	-5.1256	1.09568	3.15572
ACLY	CDC25A	-1.57077	1.09568	1.28884
ACLY	CDK4	-1.5637	1.09568	1.32981
ACLY	CDK6	-1.53382	1.09568	1.3479
ACLY	CEP57	1.33121	1.09568	1.12149
ACLY	DFFA	1.36288	1.09568	1.1706
ACLY	FAM69A	1.19016	1.09568	1.11418
ACLY	FGFR2	1.65295	1.09568	1.27416
ACLY	HMGCS1	2.2846	1.09568	1.51038
ACLY	HSPA8	-1.2113	1.09568	1.07718
ACLY	IFNAR1	1.63552	1.09568	1.23987
ACLY	LYPLA1	-2.38931	1.09568	1.41715
ACLY	NFKBIE	1.4344	1.09568	1.2682
ACLY	NPC1	1.25997	1.09568	1.23917
ACLY	NSDHL	1.26978	1.09568	1.17785
ACLY	NVL	1.47376	1.09568	1.30356
ACLY	PEX19	2.42623	1.09568	1.8047
ACLY	PGRMC1	-1.4676	1.09568	1.34355
ACLY	PIK3CA	3.8593	1.09568	1.5021
ACLY	PRKX	1.1402	1.09568	0.924919
ACLY	PRPF6	3.8287	1.09568	2.85058
ACLY	PTK2B	1.214	1.09568	0.955151
ACLY	RPS5	1.30551	1.09568	0.744492
ACLY	SOX2	1.11163	1.09568	1.00188
ACLY	SPP1	-1.90875	1.09568	1.30804
ACLY	TRIM2	1.37456	1.09568	1.35489
ACLY	UBE3C	-1.46788	1.09568	1.14626
ACO2	ABCC5	1.61035	1.08783	1.60642
ACO2	ABHD6	1.97291	1.08783	1.34953
ACO2	ANXA7	-1.768	1.08783	1.07661
ACO2	CAPN1	1.5115	1.08783	1.2912
ACO2	CBR3	-1.75724	1.08783	1.15633
ACO2	CD14	-4.0621	1.08783	3.15572
ACO2	GMNN	-1.7341	1.08783	1.72067
ACO2	KIF14	-2.45841	1.08783	1.49681
ACO2	KTN1	2.3432	1.08783	1.87494
ACO2	POLE2	-2.25348	1.08783	2.02572
ACO2	PRPF6	3.9456	1.08783	2.85058
ACO2	SCARB1	-1.3773	1.08783	1.15294
ACO2	SCCPDH	1.4393	1.08783	1.34219
ACO2	STAMBP	-1.70813	1.08783	1.07609
ACO2	TBXA2R	-1.50982	1.08783	1.42372
ACO2	TIMELESS	-2.25227	1.08783	2.08678
ACO2	TMEM2	1.61975	1.08783	1.58905
ACOT9	ABHD6	3.71736	2.8119	1.34953
ACOT9	ANO10	2.84418	2.8119	0.986766
ACOT9	CCDC92	3.1156	2.8119	1.37799
ACOT9	CDC20	-4.7284	2.8119	2.74946
ACOT9	CNOT4	3.53258	2.8119	1.30028
ACOT9	DHDDS	3.52878	2.8119	1.30573
ACOT9	FEZ2	2.8166	2.8119	1.11478
ACOT9	GDPD5	2.9086	2.8119	1.3469
ACOT9	GPER	3.1866	2.8119	1.61959
ACOT9	HMG20B	-3.28893	2.8119	1.71552
ACOT9	MAP7	2.92908	2.8119	1.29926
ACOT9	MCOLN1	3.23019	2.8119	2.02064
ACOT9	NFKBIB	3.03765	2.8119	0.634635
ACOT9	OXA1L	-3.44417	2.8119	1.57779
ACOT9	PCNA	-3.3987	2.8119	1.64934
ACOT9	PRKX	2.93336	2.8119	0.924919
ACOT9	ST3GAL5	4.11165	2.8119	1.89811
ACOT9	STX1A	3.18075	2.8119	2.25589
ACOT9	TEX10	-3.24908	2.8119	1.27962
ACOT9	ZNF318	3.5064	2.8119	1.46295
ACSL1	AURKB	1.68372	0.887655	1.08667
ACSL1	C5	1.1141	0.887655	0.853077
ACSL1	CASP2	-1.29433	0.887655	1.2298
ACSL1	CDC20	-2.761	0.887655	2.74946
ACSL1	CDK6	-1.68629	0.887655	1.3479
ACSL1	CRK	1.1291	0.887655	1.01865
ACSL1	DFFA	1.49538	0.887655	1.1706
ACSL1	EIF4EBP1	1.63637	0.887655	1.34213
ACSL1	GHR	-1.58062	0.887655	1.55514
ACSL1	GPATCH8	1.29131	0.887655	1.15253
ACSL1	HMOX1	3.08221	0.887655	2.78122
ACSL1	HSPD1	-1.30087	0.887655	1.04674
ACSL1	NFATC4	0.92175	0.887655	0.911873
ACSL1	NFKBIE	1.301	0.887655	1.2682
ACSL1	PDGFA	2.16985	0.887655	2.02932
ACSL1	PGAM1	-1.4312	0.887655	0.916538
ACSL1	PRKX	1.37797	0.887655	0.924919
ACSL1	PROS1	-1.84475	0.887655	1.58738
ACSL1	PSMF1	1.04225	0.887655	1.0331
ACSL1	PTK2B	0.99403	0.887655	0.955151
ACSL1	SCP2	-1.57854	0.887655	1.29219
ACSL1	SKP1	1.08422	0.887655	0.91223
ACSL1	SPP1	-1.86525	0.887655	1.30804
ACSL1	SQSTM1	2.0936	0.887655	1.83584
ACSL1	TGFB3	1.05893	0.887655	0.916421
ACSL1	TGFBR2	-0.93625	0.887655	0.851681
ADA	AMDHD2	1.44992	1.03137	1.42483
ADA	ENOSF1	1.49528	1.03137	1.15893
ADA	ETS2	-2.8127	1.03137	2.62272
ADA	EZH2	-1.65443	1.03137	1.44881
ADA	GAPDH	1.3283	1.03137	1.28027
ADA	HDAC2	-1.72127	1.03137	1.37121
ADA	IKBKE	1.66904	1.03137	1.492
ADA	NUP62	1.14068	1.03137	0.942787
ADA	SNX7	1.83603	1.03137	1.52956
ADA	THAP11	2.17075	1.03137	1.88461
ADAM10	ATP11B	1.70617	0.958935	1.50524
ADAM10	CD44	-2.11332	0.958935	2.07205
ADAM10	DUSP3	1.7171	0.958935	1.65349
ADAM10	ENOPH1	-1.73777	0.958935	1.26401
ADAM10	ITGB1BP1	-2.42525	0.958935	1.60965
ADAM10	LSM6	-1.23788	0.958935	1.17053
ADAM10	NPRL2	-1.19637	0.958935	1.1578
ADAM10	SLC37A4	-2.44471	0.958935	1.38278
ADAM10	SPTLC2	1.98319	0.958935	1.44593
ADAM10	TMEM2	-1.80473	0.958935	1.58905
ADAM15	CCDC86	-1.3662	1.08853	1.32463
ADAM15	CEP57	1.1557	1.08853	1.12149
ADAM15	CSNK2A2	1.71163	1.08853	1.54975
ADAM15	GRWD1	-1.24671	1.08853	1.19481
ADAM15	HDAC2	-1.65533	1.08853	1.37121
ADAM15	IKBKE	2.0262	1.08853	1.492
ADAM15	PCBD1	2.5115	1.08853	1.7115
ADAM15	PHKA1	1.18988	1.08853	1.15064
ADAM15	RAB27A	1.71392	1.08853	1.35962
ADAM15	RNH1	1.5993	1.08853	1.40122
ADAM15	RPL39L	-1.63308	1.08853	1.41474
ADAM15	SNX7	1.71237	1.08853	1.52956
ADAM15	SYPL1	1.6984	1.08853	1.59639
ADAM15	TERF2IP	1.9026	1.08853	1.71159
ADAR	BACE2	-1.66453	0.97114	1.57321
ADAR	CD14	-4.11367	0.97114	3.15572
ADAR	DPH2	-1.59283	0.97114	1.20096
ADAR	KDELR2	-1.2658	0.97114	1.23989
ADAR	KIAA0355	1.93257	0.97114	1.41989
ADAR	PIH1D1	1.0841	0.97114	0.830035
ADAR	PRPF6	3.3942	0.97114	2.85058
ADAR	TMEM109	-1.4441	0.97114	1.32587
ADAT1	ACOT9	1.57612	1.39425	1.22468
ADAT1	ALDOC	-1.43672	1.39425	1.1522
ADAT1	ATG3	-1.56963	1.39425	1.16589
ADAT1	AURKB	1.55688	1.39425	1.08667
ADAT1	BAD	-1.65753	1.39425	1.22544
ADAT1	BID	1.57073	1.39425	1.47635
ADAT1	CDC25A	-1.6036	1.39425	1.28884
ADAT1	CDK6	-1.42795	1.39425	1.3479
ADAT1	COL1A1	-1.52307	1.39425	1.2287
ADAT1	CORO1A	1.54293	1.39425	1.22178
ADAT1	DCK	-2.19528	1.39425	1.87543
ADAT1	DENND2D	1.55897	1.39425	1.30416
ADAT1	DUSP14	-1.73898	1.39425	1.00293
ADAT1	DUSP3	2.67405	1.39425	1.65349
ADAT1	ERBB2	1.90065	1.39425	1.63108
ADAT1	GATA3	-1.66657	1.39425	1.23287
ADAT1	HES1	1.67898	1.39425	1.43625
ADAT1	HOMER2	-1.63728	1.39425	1.27221
ADAT1	ITGAE	-1.90007	1.39425	1.41437
ADAT1	KDM3A	1.7847	1.39425	1.49638
ADAT1	LSM6	-1.46897	1.39425	1.17053
ADAT1	LSR	-1.51603	1.39425	1.23721
ADAT1	LYPLA1	-1.97533	1.39425	1.41715
ADAT1	MBOAT7	2.3683	1.39425	1.62353
ADAT1	MYST4	2.43495	1.39425	1.21853
ADAT1	NPC1	1.55011	1.39425	1.23917
ADAT1	PDLIM1	2.33158	1.39425	1.68681
ADAT1	PHF15	-1.4664	1.39425	1.29433
ADAT1	PHGDH	-2.49037	1.39425	1.82082
ADAT1	PLEKHM1	1.8106	1.39425	1.64926
ADAT1	RRP12	1.40656	1.39425	1.10329
ADAT1	SLC25A13	1.75508	1.39425	1.36699
ADAT1	SLC37A4	-2.67817	1.39425	1.38278
ADAT1	SNX7	2.3064	1.39425	1.52956
ADAT1	SPTLC2	1.56622	1.39425	1.44593
ADAT1	TICAM1	1.62997	1.39425	1.52656
ADAT1	TOR1A	1.4826	1.39425	1.29618
ADAT1	TUBB6	1.66823	1.39425	1.35669
ADAT1	UFM1	1.54648	1.39425	1.43249
ADAT1	WDR7	1.84032	1.39425	1.25098
ADCK3	BAX	1.80473	0.997463	1.42078
ADCK3	CRELD2	-1.41389	0.997463	1.3225
ADCK3	DYNLT3	1.2632	0.997463	1.17502
ADCK3	MAPK13	-1.3628	0.997463	1.18631
ADCK3	PLSCR3	1.5704	0.997463	1.24087
ADCK3	RAD51C	-1.41817	0.997463	1.09198
ADCK3	RELB	1.75068	0.997463	1.5877
ADCK3	ST6GALNAC2	-1.43026	0.997463	1.01518
ADCK3	TEX10	-1.40845	0.997463	1.27962
ADCK3	TIAM1	-1.37696	0.997463	1.06496
ADCY3	ABCF3	1.13722	1.0678	1.09747
ADCY3	ADI1	-2.34473	1.0678	1.78278
ADCY3	ATP5S	-1.30615	1.0678	0.899262
ADCY3	BPHL	-1.39311	1.0678	1.21027
ADCY3	BRCA1	-1.45338	1.0678	1.32819
ADCY3	CCNB2	-2.75837	1.0678	2.15591
ADCY3	CD97	1.48112	1.0678	1.37815
ADCY3	CDC25B	-1.783	1.0678	1.34968
ADCY3	CDC45	-1.85355	1.0678	1.81572
ADCY3	CDK1	-2.12945	1.0678	1.85058
ADCY3	CFLAR	-1.24605	1.0678	1.08229
ADCY3	DCK	-2.2599	1.0678	1.87543
ADCY3	DUSP4	1.34752	1.0678	1.30866
ADCY3	GTPBP8	-2.35078	1.0678	1.51261
ADCY3	HEATR1	-1.58047	1.0678	1.30562
ADCY3	KIF20A	-2.54172	1.0678	2.06133
ADCY3	LSM5	-1.6831	1.0678	1.51953
ADCY3	NOTCH1	1.47012	1.0678	1.45928
ADCY3	NPC1	1.5532	1.0678	1.23917
ADCY3	NUSAP1	-2.38901	1.0678	2.12493
ADCY3	PLS1	-1.3955	1.0678	1.1008
ADCY3	PTPLAD1	-1.37367	1.0678	1.35019
ADCY3	PXMP2	-2.28227	1.0678	1.69231
ADCY3	RFC2	-1.8467	1.0678	1.82264
ADCY3	RFX5	-1.44693	1.0678	1.35541
ADCY3	TSC22D3	1.65655	1.0678	1.61067
ADCY3	UBE3C	-1.4154	1.0678	1.14626
ADCY3	WFS1	1.40435	1.0678	1.28384
ADCY9	CDKN1B	-1.6965	1.2315	1.49843
ADCY9	HSPA1A	-1.2568	1.2315	1.23799
ADCY9	MYL9	1.5631	1.2315	1.45919
ADH5	ABCC5	1.82205	1.23557	1.60642
ADH5	ADH5	-2.7915	1.23557	1.27183
ADH5	CDC25A	-1.7589	1.23557	1.28884
ADH5	CDC25B	-2.77543	1.23557	1.34968
ADH5	HN1L	-1.52761	1.23557	1.52693
ADH5	HSPA1A	1.3522	1.23557	1.23799
ADH5	ICAM1	1.46765	1.23557	1.04546
ADH5	PIK3CA	3.2689	1.23557	1.5021
ADH5	PPP1R13B	-2.20668	1.23557	0.870799
ADH5	PSMD2	-2.52283	1.23557	1.07042
ADH5	PSMG1	-1.26446	1.23557	1.26106
ADH5	WDR7	2.13932	1.23557	1.25098
ADI1	ADI1	-3.4858	0.967025	1.78278
ADI1	ARFIP2	1.11179	0.967025	1.07266
ADI1	CCND3	1.02846	0.967025	0.953734
ADI1	CFLAR	-1.26131	0.967025	1.08229
ADI1	DNAJA3	-2.0182	0.967025	1.25028
ADI1	HMOX1	3.17853	0.967025	2.78122
ADI1	HSPA8	-2.4065	0.967025	1.07718
ADI1	MBNL1	1.3454	0.967025	1.0732
ADI1	PTPN12	1.17308	0.967025	1.06406
ADI1	UBE3C	-1.30013	0.967025	1.14626
ADNP2	CRELD2	-1.4096	0.948366	1.3225
ADNP2	DERA	1.43915	0.948366	1.41452
ADNP2	GNAS	3.8757	0.948366	3.26368
ADNP2	HSD17B11	-1.38685	0.948366	1.22499
ADNP2	INTS3	1.34348	0.948366	1.22194
ADNP2	MAPK1IP1L	2.20324	0.948366	1.66493
ADNP2	RAP1GAP	1.20785	0.948366	1.06153
ADO	ABHD4	2.01775	1.06784	1.40776
ADO	ARPP19	-1.43713	1.06784	1.40644
ADO	CCNB2	-2.51167	1.06784	2.15591
ADO	COG2	1.61758	1.06784	1.37389
ADO	CRELD2	-1.74377	1.06784	1.3225
ADO	CTNNAL1	-1.50245	1.06784	1.03212
ADO	CXCL2	-1.39323	1.06784	1.21619
ADO	DNAJB2	2.005	1.06784	1.6374
ADO	EVL	1.93797	1.06784	1.48812
ADO	HOOK2	1.20083	1.06784	1.16111
ADO	HPRT1	-1.9988	1.06784	1.70512
ADO	IER3	-2.31822	1.06784	1.97045
ADO	MTERFD1	-1.4676	1.06784	1.32975
ADO	PIN1	1.9522	1.06784	1.51812
ADO	PNKP	1.30208	1.06784	1.17845
ADO	PTPN1	1.39525	1.06784	1.38922
ADO	RPS6KA1	-1.69047	1.06784	1.48361
ADO	SLC37A4	2.01523	1.06784	1.38278
ADO	SNAP25	1.38307	1.06784	1.15788
ADO	TM9SF3	1.67401	1.06784	1.41787
ADO	WDR67	-1.43945	1.06784	1.1125
ADRA2C	ARNT2	3.25255	2.23266	1.9532
ADRA2C	CASK	2.45053	2.23266	1.31372
ADRA2C	CD14	5.72588	2.23266	3.15572
ADRA2C	CLCN3	2.44843	2.23266	2.15837
ADRA2C	IER3	-3.23447	2.23266	1.97045
ADRA2C	MCOLN1	2.7032	2.23266	2.02064
ADRA2C	MVP	2.52212	2.23266	1.98196
ADRA2C	PNP	-2.2909	2.23266	1.32791
ADRA2C	PRPF6	-3.2279	2.23266	2.85058
ADRA2C	THAP11	2.75785	2.23266	1.88461
ADRA2C	TIMELESS	-2.27743	2.23266	2.08678
ADRA2C	ZNF451	2.564	2.23266	1.33812
ADRA2C	ZNF586	2.3034	2.23266	1.84576
ADRB2	ARL4C	2.74902	1.68624	1.95279
ADRB2	ARNT2	2.08822	1.68624	1.9532
ADRB2	CANT1	-1.6927	1.68624	1.39476
ADRB2	CASP3	1.7001	1.68624	1.40138
ADRB2	FAM20B	1.80052	1.68624	1.09119
ADRB2	FOXO4	2.69995	1.68624	1.486
ADRB2	FUT1	1.92742	1.68624	1.51174
ADRB2	HN1L	1.7967	1.68624	1.52693
ADRB2	IARS2	-1.71023	1.68624	1.35742
ADRB2	KIT	2.4194	1.68624	1.53817
ADRB2	LGMN	1.82043	1.68624	1.42755
ADRB2	LSM5	-2.4816	1.68624	1.51953
ADRB2	MRPS16	-1.9573	1.68624	1.40058
ADRB2	MSRA	1.95585	1.68624	1.56295
ADRB2	NFE2L2	-1.8212	1.68624	1.33021
ADRB2	THAP11	2.38975	1.68624	1.88461
ADRB2	TRIM13	2.2591	1.68624	1.24045
ADRB2	ZER1	2.59278	1.68624	1.89132
ADRB2	ZNF318	1.7767	1.68624	1.46295
ADRB2	ZNF451	2.302	1.68624	1.33812
ADSS	ARNT2	2.82235	1.53005	1.9532
ADSS	BDH1	-1.59897	1.53005	1.53934
ADSS	CD44	2.2432	1.53005	2.07205
ADSS	CDK2	1.90053	1.53005	1.32164
ADSS	HN1L	2.0855	1.53005	1.52693
ADSS	LRPAP1	1.7231	1.53005	1.32598
ADSS	NCAPD2	1.5826	1.53005	1.32274
ADSS	NIT1	2.22632	1.53005	1.57474
ADSS	PHKB	1.55973	1.53005	0.998538
ADSS	RFNG	1.70567	1.53005	1.55813
ADSS	SHB	1.67733	1.53005	1.28006
ADSS	SNX13	1.59558	1.53005	1.38909
ADSS	THAP11	2.73685	1.53005	1.88461
ADSS	ZFP36	1.8731	1.53005	1.70612
AES	ACAT2	-3.23677	2.24404	1.33524
AES	ALAS1	-2.45927	2.24404	1.57257
AES	BAMBI	-2.3167	2.24404	1.23811
AES	BAZ2B	2.45405	2.24404	1.91888
AES	BDH1	-2.98407	2.24404	1.53934
AES	BTG3	2.8337	2.24404	2.13719
AES	CCNB2	-2.55027	2.24404	2.15591
AES	CD14	4.71438	2.24404	3.15572
AES	CTCF	-3.0232	2.24404	2.06148
AES	DCTD	-2.41231	2.24404	1.29905
AES	DDB2	-2.95937	2.24404	1.13905
AES	DLD	-3.03437	2.24404	1.01275
AES	FOXO4	3.94695	2.24404	1.486
AES	GPC1	4.1752	2.24404	1.47194
AES	HBE1	2.26947	2.24404	1.78891
AES	HMG20B	-2.347	2.24404	1.71552
AES	HS2ST1	2.29988	2.24404	1.4323
AES	IFRD2	-2.74927	2.24404	1.69534
AES	ILK	-4.44427	2.24404	1.0352
AES	KIAA0317	4.16577	2.24404	1.91741
AES	KIF2C	-2.63093	2.24404	1.47296
AES	KTN1	-2.3033	2.24404	1.87494
AES	LSM5	-3.4331	2.24404	1.51953
AES	MAN2A2	-2.6427	2.24404	2.05594
AES	MAP3K4	2.41656	2.24404	1.18406
AES	MEGF9	-2.77803	2.24404	1.69827
AES	MEST	-2.3967	2.24404	1.37726
AES	NIPSNAP1	-2.9452	2.24404	1.17518
AES	NNT	2.5029	2.24404	1.17942
AES	NR2F6	-2.7333	2.24404	1.25505
AES	PAFAH1B1	-2.4123	2.24404	0.930944
AES	PAFAH1B3	-3.36687	2.24404	1.38299
AES	PKD1	3.48723	2.24404	2.07866
AES	PLOD3	-2.7763	2.24404	1.31851
AES	POLR1C	-2.44239	2.24404	0.90653
AES	POP4	-2.34533	2.24404	1.34727
AES	RPIA	-3.3583	2.24404	1.46433
AES	SMC4	-3.62197	2.24404	1.56563
AES	SPTLC2	2.44002	2.24404	1.44593
AES	ST7	2.6265	2.24404	1.04572
AES	TCEA2	-2.6828	2.24404	1.14273
AES	TSN	-3.2462	2.24404	2.43354
AES	UBE2C	-2.7635	2.24404	1.94566
AES	UGP2	-2.5406	2.24404	2.37623
AES	VAT1	-2.2941	2.24404	1.25919
AES	ZER1	3.64512	2.24404	1.89132
AES	ZGPAT	-2.77987	2.24404	2.08462
AES	ZNF768	2.3667	2.24404	2.0305
AFF1	CCNB2	-2.15818	1.78024	2.15591
AFF1	SIRT3	1.78317	1.78024	1.66157
AFF1	TLK2	-1.8723	1.78024	1.33921
AFG3L2	ADI1	-2.2521	0.976909	1.78278
AFG3L2	BNIP3L	1.06238	0.976909	1.01647
AFG3L2	CCNB1	-1.5096	0.976909	1.486
AFG3L2	CCNB2	-3.32047	0.976909	2.15591
AFG3L2	CFLAR	-1.10088	0.976909	1.08229
AFG3L2	COPS7A	-1.34	0.976909	1.31558
AFG3L2	CRK	-1.0981	0.976909	1.01865
AFG3L2	DCK	-2.10564	0.976909	1.87543
AFG3L2	DDIT4	2.66867	0.976909	1.72196
AFG3L2	DDX10	-1.19197	0.976909	1.03207
AFG3L2	LGALS8	1.08165	0.976909	1.05134
AFG3L2	MAST2	1.01986	0.976909	1.00399
AFG3L2	MTF2	1.07512	0.976909	1.06358
AFG3L2	PIGB	-1.01396	0.976909	0.933447
AFG3L2	POLE2	-2.46885	0.976909	2.02572
AFG3L2	SQSTM1	1.9442	0.976909	1.83584
AFG3L2	TGFBR2	1.11097	0.976909	0.851681
AFG3L2	TRAPPC3	-1.2688	0.976909	1.06385
AFG3L2	TSC22D3	2.41845	0.976909	1.61067
AGL	CD14	-4.21843	1.18435	3.15572
AGL	CDK7	-1.20968	1.18435	1.18761
AGL	P4HTM	1.53888	1.18435	1.42285
AGL	PRPF6	3.9161	1.18435	2.85058
AGL	ST3GAL5	1.97593	1.18435	1.89811
AHCY	ARNT2	2.08258	1.3586	1.9532
AHCY	DDIT4	1.7252	1.3586	1.72196
AHCY	HN1L	1.7348	1.3586	1.52693
AHCY	LAMA3	2.25067	1.3586	1.6427
AHCY	LGMN	1.59503	1.3586	1.42755
AHCY	LSM6	1.50535	1.3586	1.17053
AHCY	RSU1	1.64805	1.3586	1.26409
AHCY	SKIV2L	1.68905	1.3586	1.28426
AHCY	SNX13	1.63385	1.3586	1.38909
AHCY	THAP11	2.65155	1.3586	1.88461
AIMP2	ADAM10	2.05428	1.6813	1.29149
AIMP2	ARL4C	2.52192	1.6813	1.95279
AIMP2	CASP3	2.8776	1.6813	1.40138
AIMP2	CDK1	-2.16207	1.6813	1.85058
AIMP2	CERK	1.77592	1.6813	1.38998
AIMP2	DDB2	-1.8964	1.6813	1.13905
AIMP2	EIF1B	-2.5517	1.6813	2.23137
AIMP2	FADD	-1.7105	1.6813	1.61853
AIMP2	FOXO4	3.52605	1.6813	1.486
AIMP2	FUT1	2.04812	1.6813	1.51174
AIMP2	HTATSF1	-2.102	1.6813	1.18656
AIMP2	ICAM3	3.43447	1.6813	1.40348
AIMP2	KIT	2.3093	1.6813	1.53817
AIMP2	LSM5	-1.9284	1.6813	1.51953
AIMP2	MALT1	3.94903	1.6813	1.40905
AIMP2	MRPS16	-1.8436	1.6813	1.40058
AIMP2	NPDC1	-2.6644	1.6813	1.28294
AIMP2	PHKG2	-2.03049	1.6813	0.955358
AIMP2	PKD1	2.39536	1.6813	2.07866
AIMP2	PMAIP1	2.25217	1.6813	1.53116
AIMP2	POP4	-2.05613	1.6813	1.34727
AIMP2	PSRC1	-2.0809	1.6813	1.09906
AIMP2	PUF60	-2.2097	1.6813	1.27841
AIMP2	PYGL	-1.76643	1.6813	1.45016
AIMP2	SLC36A1	2.08622	1.6813	2.03261
AIMP2	SNRPD1	-2.00937	1.6813	1.9308
AIMP2	STAMBP	-1.91747	1.6813	1.07609
AIMP2	TCEA2	-1.89787	1.6813	1.14273
AIMP2	THAP11	2.51105	1.6813	1.88461
AIMP2	TIMM9	-1.9128	1.6813	1.7176
AIMP2	TOP2A	-2.8078	1.6813	2.3385
AIMP2	TRIB1	1.81692	1.6813	1.62548
AIMP2	UBE2C	-2.4357	1.6813	1.94566
AIMP2	UBE4A	-2.4939	1.6813	2.03918
AIMP2	VPS28	-2.73523	1.6813	1.62433
AIMP2	ZFP161	2.57155	1.6813	1.88038
AIRE	AKR7A2	-1.3587	1.12899	1.19406
AIRE	LPGAT1	-2.43962	1.12899	1.16316
AIRE	PPARG	3.69422	1.12899	1.74884
AIRE	TERF2IP	-2.3175	1.12899	1.71159
AK2	ARID5B	1.23545	0.949961	1.09808
AK2	ARNT2	2.0684	0.949961	1.9532
AK2	ASL	-2.8051	0.949961	2.06975
AK2	ATMIN	1.30855	0.949961	1.0747
AK2	BCL2	-1.1801	0.949961	1.14472
AK2	BHLHE40	2.77345	0.949961	1.86956
AK2	BNIP3	-1.6263	0.949961	1.20031
AK2	C2CD2L	-1.44933	0.949961	1.15874
AK2	CEBPD	1.11485	0.949961	1.08755
AK2	CREG1	-1.6272	0.949961	0.982329
AK2	CSK	-1.8419	0.949961	1.27432
AK2	DDIT4	2.3993	0.949961	1.72196
AK2	DHPS	-2.0447	0.949961	1.94016
AK2	ELAVL1	-1.39995	0.949961	1.16691
AK2	ETFB	-1.7545	0.949961	1.19241
AK2	EVL	-1.66588	0.949961	1.48812
AK2	FAT1	2.1425	0.949961	2.12536
AK2	FBXO7	1.0228	0.949961	0.935182
AK2	GDPD5	-1.61735	0.949961	1.3469
AK2	GMNN	-1.72635	0.949961	1.72067
AK2	KCNK1	1.57535	0.949961	1.21977
AK2	KCTD5	1.05805	0.949961	0.912785
AK2	KDM3A	1.5393	0.949961	1.49638
AK2	KIF14	-1.57185	0.949961	1.49681
AK2	KIF2C	-2.17417	0.949961	1.47296
AK2	LAMA3	1.7646	0.949961	1.6427
AK2	MALT1	-2.3186	0.949961	1.40905
AK2	MAP7	-1.703	0.949961	1.29926
AK2	MLLT11	1.97345	0.949961	1.42959
AK2	MYBL2	-2.3447	0.949961	2.11682
AK2	PAPD7	-1.15667	0.949961	0.915037
AK2	PIH1D1	-1.18193	0.949961	0.830035
AK2	PRPF4	-2.7691	0.949961	2.42261
AK2	PSIP1	-2.14227	0.949961	1.73122
AK2	RPL39L	-1.67573	0.949961	1.41474
AK2	SESN1	1.67297	0.949961	1.51603
AK2	SLC35F2	1.23847	0.949961	1.03869
AK2	SPAG4	-1.41737	0.949961	1.03126
AK2	STMN1	-1.85725	0.949961	1.77977
AK2	SYNE2	-1.25137	0.949961	0.98081
AK2	TRAK2	-1.49805	0.949961	1.47273
AK2	TSC22D3	1.7152	0.949961	1.61067
AK2	TSN	2.4484	0.949961	2.43354
AKAP11	ABHD6	2.73843	2.51961	1.34953
AKAP11	ASMTL	2.91748	2.51961	1.94759
AKAP11	BTG3	3.98932	2.51961	2.13719
AKAP11	C2CD2	2.71687	2.51961	1.39145
AKAP11	CAT	2.64725	2.51961	0.960342
AKAP11	CD44	3.14763	2.51961	2.07205
AKAP11	DLGAP5	4.47513	2.51961	2.02256
AKAP11	DNMT1	3.13	2.51961	1.56377
AKAP11	EGFR	2.85328	2.51961	1.65427
AKAP11	EPHB4	2.8216	2.51961	2.44862
AKAP11	FAT1	3.04192	2.51961	2.12536
AKAP11	FOXO4	3.62693	2.51961	1.486
AKAP11	GPER	2.6351	2.51961	1.61959
AKAP11	H2AFV	3.92778	2.51961	1.3544
AKAP11	IER3	-4.69303	2.51961	1.97045
AKAP11	IFIT5	2.75405	2.51961	2.15129
AKAP11	JUN	3.77578	2.51961	1.90057
AKAP11	KDM5A	2.5211	2.51961	1.26686
AKAP11	KIT	2.61737	2.51961	1.53817
AKAP11	KLHL21	2.77011	2.51961	1.38055
AKAP11	LYN	2.62482	2.51961	1.62507
AKAP11	MCOLN1	2.83185	2.51961	2.02064
AKAP11	NIPBL	2.7308	2.51961	2.243
AKAP11	NSFL1C	2.72145	2.51961	1.86469
AKAP11	PAX8	3.90935	2.51961	1.27715
AKAP11	PLEKHM1	2.61598	2.51961	1.64926
AKAP11	PMAIP1	2.84242	2.51961	1.53116
AKAP11	PPARG	3.95152	2.51961	1.74884
AKAP11	RFNG	2.54762	2.51961	1.55813
AKAP11	SGK1	2.9997	2.51961	2.46186
AKAP11	SLC16A6	2.7812	2.51961	2.08815
AKAP11	SNX7	3.00165	2.51961	1.52956
AKAP11	STK10	2.9438	2.51961	1.56769
AKAP11	TRAK2	2.54213	2.51961	1.47273
AKAP11	TRAM2	2.97833	2.51961	1.14885
AKAP11	TRIM13	2.82098	2.51961	1.24045
AKAP11	ZNF318	2.75092	2.51961	1.46295
AKAP11	ZNF395	2.66935	2.51961	1.69737
AKAP8	ACBD3	1.47283	1.30436	1.42511
AKAP8	ADH5	-1.33827	1.30436	1.27183
AKAP8	ATF5	-2.328	1.30436	1.47133
AKAP8	ATG3	-1.90056	1.30436	1.16589
AKAP8	ATP6V1D	1.68103	1.30436	1.58027
AKAP8	BLCAP	1.928	1.30436	1.84245
AKAP8	CASP10	1.37253	1.30436	1.14797
AKAP8	CCNB2	-2.4388	1.30436	2.15591
AKAP8	CCP110	-2.37333	1.30436	1.54804
AKAP8	CD320	-1.7488	1.30436	1.50159
AKAP8	CDC20	-3.22777	1.30436	2.74946
AKAP8	CDK4	-2.13023	1.30436	1.32981
AKAP8	CLTC	3.25158	1.30436	3.11268
AKAP8	COG2	-1.72613	1.30436	1.37389
AKAP8	COG7	-2.4667	1.30436	1.28737
AKAP8	COPS7A	-1.8659	1.30436	1.31558
AKAP8	CTTN	-1.64515	1.30436	1.35525
AKAP8	DERA	-1.66271	1.30436	1.41452
AKAP8	DHX29	1.53492	1.30436	1.14416
AKAP8	EIF5	-1.5877	1.30436	1.1534
AKAP8	FBXO21	-1.49567	1.30436	1.27583
AKAP8	FUT1	1.72443	1.30436	1.51174
AKAP8	GOLT1B	-1.39729	1.30436	1.24008
AKAP8	GRWD1	-1.52858	1.30436	1.19481
AKAP8	HAT1	-1.8028	1.30436	1.44927
AKAP8	HOMER2	-2.47495	1.30436	1.27221
AKAP8	IPO13	2.2174	1.30436	2.01774
AKAP8	KIAA0528	-1.5618	1.30436	1.16454
AKAP8	KIAA1033	-1.9488	1.30436	1.12852
AKAP8	KIF20A	-2.49355	1.30436	2.06133
AKAP8	LGMN	1.4316	1.30436	1.42755
AKAP8	LOXL1	1.38325	1.30436	1.35703
AKAP8	LRP10	2.0915	1.30436	1.76525
AKAP8	MAST2	1.54545	1.30436	1.00399
AKAP8	MBOAT7	2.4583	1.30436	1.62353
AKAP8	MELK	-2.5129	1.30436	2.12768
AKAP8	MRPS2	-1.4896	1.30436	1.36324
AKAP8	NCOA3	1.6551	1.30436	1.57306
AKAP8	NET1	-1.48972	1.30436	1.20936
AKAP8	NPC1	1.78895	1.30436	1.23917
AKAP8	NPEPL1	-2.4493	1.30436	1.15927
AKAP8	NPRL2	-1.53033	1.30436	1.1578
AKAP8	NR3C1	-1.40015	1.30436	1.30447
AKAP8	NUSAP1	-2.34942	1.30436	2.12493
AKAP8	PARP2	-1.97732	1.30436	1.63176
AKAP8	PHF15	-1.76397	1.30436	1.29433
AKAP8	PLK1	-3.70983	1.30436	3.11504
AKAP8	PRR7	-1.31626	1.30436	1.24565
AKAP8	RALB	1.88654	1.30436	1.37513
AKAP8	RFC2	-1.95793	1.30436	1.82264
AKAP8	RFC5	1.7588	1.30436	1.69209
AKAP8	RNPS1	-1.5509	1.30436	1.17614
AKAP8	RSU1	2.16349	1.30436	1.26409
AKAP8	RUVBL1	-1.6992	1.30436	1.42533
AKAP8	SCP2	-1.53715	1.30436	1.29219
AKAP8	SLC25A13	1.51458	1.30436	1.36699
AKAP8	SMARCA4	1.58392	1.30436	1.13296
AKAP8	SNX7	1.8319	1.30436	1.52956
AKAP8	SPP1	-1.75729	1.30436	1.30804
AKAP8	TBC1D9B	-1.69093	1.30436	1.52448
AKAP8	TCTA	1.62747	1.30436	1.26316
AKAP8	TLK2	-1.38285	1.30436	1.33921
AKAP8	TOMM34	1.42035	1.30436	1.34659
AKAP8	TSPAN4	-2.74387	1.30436	1.57424
AKAP8	TXNRD1	2.21427	1.30436	1.76973
AKAP8	VGLL4	1.72153	1.30436	1.60268
AKAP8	ZMYM2	-1.93833	1.30436	1.34291
AKAP8L	ACD	-2.44497	1.39705	1.60158
AKAP8L	BIRC5	-2.6839	1.39705	2.50778
AKAP8L	BMP4	1.7104	1.39705	1.25527
AKAP8L	BRP44	-1.6133	1.39705	1.34838
AKAP8L	CCNA2	-2.3049	1.39705	2.21852
AKAP8L	CCNB2	-2.92047	1.39705	2.15591
AKAP8L	CD58	-2.45768	1.39705	1.32345
AKAP8L	CDC20	-2.8523	1.39705	2.74946
AKAP8L	CHAC1	3.0461	1.39705	2.39528
AKAP8L	CNPY3	1.44298	1.39705	1.41671
AKAP8L	COPS7A	-1.4282	1.39705	1.31558
AKAP8L	CTSL1	2.249	1.39705	1.85358
AKAP8L	DCK	-1.9037	1.39705	1.87543
AKAP8L	DDX42	1.93355	1.39705	1.16873
AKAP8L	DNAJB1	1.84835	1.39705	1.44
AKAP8L	EIF4G1	-2.28271	1.39705	1.83426
AKAP8L	FHL2	-2.7433	1.39705	2.01553
AKAP8L	FOXO4	2.64892	1.39705	1.486
AKAP8L	HEATR1	-1.65413	1.39705	1.30562
AKAP8L	HMOX1	4.00915	1.39705	2.78122
AKAP8L	HPRT1	-1.8474	1.39705	1.70512
AKAP8L	HYOU1	1.97947	1.39705	1.58024
AKAP8L	IER3	-2.46346	1.39705	1.97045
AKAP8L	ITGAE	-2.02842	1.39705	1.41437
AKAP8L	ITGB1BP1	-1.62228	1.39705	1.60965
AKAP8L	KIF20A	-3.07577	1.39705	2.06133
AKAP8L	LSM5	-2.7973	1.39705	1.51953
AKAP8L	MBNL2	2.05492	1.39705	1.61849
AKAP8L	MELK	-2.28113	1.39705	2.12768
AKAP8L	MICALL1	1.82122	1.39705	1.32787
AKAP8L	MTERFD1	-1.64663	1.39705	1.32975
AKAP8L	MYC	-2.25135	1.39705	1.91918
AKAP8L	NRAS	-1.64153	1.39705	1.29175
AKAP8L	OXA1L	-1.8963	1.39705	1.57779
AKAP8L	PARP2	-2.01977	1.39705	1.63176
AKAP8L	PCMT1	-2.09247	1.39705	1.28687
AKAP8L	PIK3CA	1.86599	1.39705	1.5021
AKAP8L	PLEKHM1	1.72105	1.39705	1.64926
AKAP8L	PMAIP1	1.95148	1.39705	1.53116
AKAP8L	PPARG	2.15346	1.39705	1.74884
AKAP8L	PTPLAD1	-1.56783	1.39705	1.35019
AKAP8L	RPS6KA1	-1.4993	1.39705	1.48361
AKAP8L	SKP1	-1.53092	1.39705	0.91223
AKAP8L	SPDEF	-2.2315	1.39705	1.59019
AKAP8L	TES	1.70097	1.39705	1.68268
AKAP8L	TFDP1	-1.62368	1.39705	1.32409
AKAP8L	TOP2A	-3.19873	1.39705	2.3385
AKAP8L	XBP1	-1.9508	1.39705	1.6396
AKAP9	ARL4C	2.1172	1.74802	1.95279
AKAP9	BTG3	2.8242	1.74802	2.13719
AKAP9	CAPN1	1.91688	1.74802	1.2912
AKAP9	CD14	4.18907	1.74802	3.15572
AKAP9	CSNK2A2	1.99668	1.74802	1.54975
AKAP9	DLGAP5	2.17655	1.74802	2.02256
AKAP9	EDEM1	2.0757	1.74802	1.56262
AKAP9	FOXO4	1.76864	1.74802	1.486
AKAP9	GPER	2.17008	1.74802	1.61959
AKAP9	HERC6	2.11978	1.74802	1.22766
AKAP9	HLF	2.22908	1.74802	1.807
AKAP9	IFIT5	2.40868	1.74802	2.15129
AKAP9	IL4R	2.84323	1.74802	1.63454
AKAP9	KIT	1.76133	1.74802	1.53817
AKAP9	LYN	1.8072	1.74802	1.62507
AKAP9	MYCBP2	1.77683	1.74802	1.35423
AKAP9	PMAIP1	2.64119	1.74802	1.53116
AKAP9	POLE2	-2.17075	1.74802	2.02572
AKAP9	POLG2	2.1563	1.74802	1.32161
AKAP9	PTPN1	1.8234	1.74802	1.38922
AKAP9	RAB27A	1.90483	1.74802	1.35962
AKAP9	RTN2	1.98753	1.74802	1.68435
AKAP9	SESN1	2.00482	1.74802	1.51603
AKAP9	SKIV2L	1.76763	1.74802	1.28426
AKAP9	SLC2A6	1.8419	1.74802	1.69052
AKAP9	ZNF395	1.9358	1.74802	1.69737
AKR1A1	ADI1	-1.82278	0.855989	1.78278
AKR1A1	APP	1.121	0.855989	1.04052
AKR1A1	AURKA	-1.71347	0.855989	1.29787
AKR1A1	BNIP3L	1.23245	0.855989	1.01647
AKR1A1	CCNA2	-2.56687	0.855989	2.21852
AKR1A1	CCNB1	-2.2087	0.855989	1.486
AKR1A1	CCNB2	-2.39306	0.855989	2.15591
AKR1A1	CD320	-1.56745	0.855989	1.50159
AKR1A1	CD40	2.62973	0.855989	2.17187
AKR1A1	CDCA4	-1.99517	0.855989	1.97909
AKR1A1	CDK2	-1.35215	0.855989	1.32164
AKR1A1	CDK4	-2.02727	0.855989	1.32981
AKR1A1	COL4A1	1.24957	0.855989	0.908156
AKR1A1	DNMT3A	1.61387	0.855989	1.27243
AKR1A1	ETS1	1.13187	0.855989	1.04246
AKR1A1	EZH2	-1.45117	0.855989	1.44881
AKR1A1	FGFR2	1.4458	0.855989	1.27416
AKR1A1	FHL2	-2.04957	0.855989	2.01553
AKR1A1	FOXO4	1.83056	0.855989	1.486
AKR1A1	FYN	1.07107	0.855989	0.880051
AKR1A1	FZD1	1.60924	0.855989	1.30742
AKR1A1	GRB7	2.43013	0.855989	2.18951
AKR1A1	IFRD2	-1.92795	0.855989	1.69534
AKR1A1	KDM3A	1.86872	0.855989	1.49638
AKR1A1	KIF14	-1.54799	0.855989	1.49681
AKR1A1	LSM5	-2.2672	0.855989	1.51953
AKR1A1	MBNL2	1.65778	0.855989	1.61849
AKR1A1	MYBL2	-2.24073	0.855989	2.11682
AKR1A1	NENF	-1.13713	0.855989	1.02458
AKR1A1	NOLC1	-1.81207	0.855989	1.41876
AKR1A1	PAK4	-1.28554	0.855989	1.20584
AKR1A1	PCNA	-1.9248	0.855989	1.64934
AKR1A1	PIK3CA	1.61897	0.855989	1.5021
AKR1A1	PLA2G4A	2.0196	0.855989	1.7311
AKR1A1	PLK1	-3.12837	0.855989	3.11504
AKR1A1	POLE2	-2.69538	0.855989	2.02572
AKR1A1	PPARD	1.13347	0.855989	0.929695
AKR1A1	PRAF2	1.41335	0.855989	1.3967
AKR1A1	PTK2B	0.97295	0.855989	0.955151
AKR1A1	PTPRC	0.9166	0.855989	0.785272
AKR1A1	SMAD3	2.20795	0.855989	2.03593
AKR1A1	SOX2	1.04519	0.855989	1.00188
AKR1A1	TERT	0.90758	0.855989	0.830746
AKR1A1	TFDP1	-1.59547	0.855989	1.32409
AKR1A1	TIMP2	2.18502	0.855989	1.91805
AKR1A1	TPM1	1.54412	0.855989	1.29102
AKR1A1	TRIB3	-1.6901	0.855989	1.38151
AKR1A1	UBE2C	-2.55846	0.855989	1.94566
AKR1C1	EGFR	-1.67193	1.10372	1.65427
AKR1C1	GDPD5	-1.38903	1.10372	1.3469
AKR1C1	HIST2H2BE	2.2077	1.10372	1.87641
AKR1C1	MALT1	-1.62393	1.10372	1.40905
AKR1C1	VPS28	1.9215	1.10372	1.62433
AKR1C2	ARHGEF2	1.96317	0.809354	1.4072
AKR1C2	GNA11	0.9875	0.809354	0.976009
AKR1C2	MALT1	-1.6552	0.809354	1.40905
AKR1C2	PCM1	1.2568	0.809354	1.06841
AKR1C3	ARHGEF2	2.0522	1.64425	1.4072
AKR1C3	BHLHE40	2.03312	1.64425	1.86956
AKR1C3	BUB1B	1.8824	1.64425	1.36437
AKR1C3	CDK1	-1.9258	1.64425	1.85058
AKR1C3	DDIT4	2.2889	1.64425	1.72196
AKR1C3	DNTTIP2	1.6861	1.64425	1.13932
AKR1C3	FEZ1	2.60387	1.64425	2.4955
AKR1C3	GLRX	1.72785	1.64425	1.48128
AKR1C3	GMNN	-1.85783	1.64425	1.72067
AKR1C3	H2AFV	1.7382	1.64425	1.3544
AKR1C3	OXCT1	1.7827	1.64425	1.1312
AKR1C3	POLE2	-2.47328	1.64425	2.02572
AKR1C3	RFNG	2.17965	1.64425	1.55813
AKR1C3	SCCPDH	1.6982	1.64425	1.34219
AKR1C3	TES	1.81445	1.64425	1.68268
AKR1C3	TRIM2	1.67175	1.64425	1.35489
AKR1C3	UFM1	1.9603	1.64425	1.43249
AKR1C3	VAT1	1.8088	1.64425	1.25919
AKR1C3	VPS28	2.4597	1.64425	1.62433
AKR7A2	AKR7A2	-4	1.00489	1.19406
AKR7A2	BAX	-1.6074	1.00489	1.42078
AKR7A2	BPHL	-1.94289	1.00489	1.21027
AKR7A2	CDC25A	-1.6142	1.00489	1.28884
AKR7A2	CDC42	-1.3784	1.00489	1.11332
AKR7A2	CDK1	-1.91125	1.00489	1.85058
AKR7A2	CDK6	-1.51969	1.00489	1.3479
AKR7A2	FHL2	-2.17399	1.00489	2.01553
AKR7A2	HDGFRP3	1.27264	1.00489	1.08663
AKR7A2	IFRD2	-1.72975	1.00489	1.69534
AKR7A2	NFKB2	1.37422	1.00489	1.36888
AKR7A2	NOL3	1.41125	1.00489	1.08647
AKR7A2	NUSAP1	-2.16186	1.00489	2.12493
AKR7A2	PARP1	-1.7045	1.00489	0.933481
AKR7A2	PPP1R13B	-1.61908	1.00489	0.870799
AKR7A2	RASA1	2.61407	1.00489	1.20747
AKR7A2	REEP5	1.68734	1.00489	1.39069
AKR7A2	S100A4	1.90697	1.00489	1.49591
AKR7A2	SCCPDH	1.39817	1.00489	1.34219
AKR7A2	TICAM1	2.4388	1.00489	1.52656
AKT1	AKT1	-2.33906	1.69969	1.16987
AKT1	DUSP6	2.13291	1.69969	1.43363
AKT1	MEF2C	1.80268	1.69969	1.73161
AKT1	MUC1	-1.96803	1.69969	1.51542
AKT1	PARP2	-1.85997	1.69969	1.63176
AKT2	ALMS1	1.78847	0.998201	1.73388
AKT2	ASCC3	-1.5476	0.998201	1.23666
AKT2	MLEC	-2.146	0.998201	1.7095
AKT2	POLB	1.6681	0.998201	1.05748
AKT2	RRP8	-1.33494	0.998201	1.16519
AKT2	TRIM13	1.97558	0.998201	1.24045
ALAS1	CXCL2	1.40835	1.34938	1.21619
ALAS1	PSMF1	1.3976	1.34938	1.0331
ALAS1	RPS6	-2.022	1.34938	0.862976
ALAS1	USP14	1.37276	1.34938	1.24119
ALDH18A1	AMDHD2	1.7922	1.07787	1.42483
ALDH18A1	ANKRD10	1.30518	1.07787	1.1126
ALDH18A1	CCDC85B	-1.357	1.07787	1.24642
ALDH18A1	CLTB	-1.4787	1.07787	1.41653
ALDH18A1	DCTD	-1.35715	1.07787	1.29905
ALDH18A1	FBXO7	-1.13669	1.07787	0.935182
ALDH18A1	GFPT1	1.21932	1.07787	1.18233
ALDH18A1	PCBD1	2.4106	1.07787	1.7115
ALDH18A1	RPL39L	-1.64788	1.07787	1.41474
ALDH18A1	SORBS3	-1.48076	1.07787	1.23413
ALDH18A1	TERF2IP	1.8675	1.07787	1.71159
ALDH18A1	TRIM13	1.87697	1.07787	1.24045
ALDH1A3	BHLHE40	2.53197	1.215	1.86956
ALDH1A3	CAT	-1.91005	1.215	0.960342
ALDH1A3	CDK2	-2.56297	1.215	1.32164
ALDH1A3	DYNLT3	1.3422	1.215	1.17502
ALDH1A3	ENOSF1	-1.6336	1.215	1.15893
ALDH1A3	GDPD5	1.37975	1.215	1.3469
ALDH1A3	MEST	-1.6415	1.215	1.37726
ALDH1A3	PCBD1	2.6709	1.215	1.7115
ALDH1A3	PCK2	-3.04927	1.215	1.34423
ALDH1A3	RBM15B	-1.96207	1.215	1.133
ALDH3A2	ALMS1	2.75518	1.59598	1.73388
ALDH3A2	COPB2	-3.55267	1.59598	1.3742
ALDH3A2	CRYZ	-2.0829	1.59598	1.15025
ALDH3A2	CTSD	-2.6189	1.59598	1.47682
ALDH3A2	DMTF1	1.6871	1.59598	0.958021
ALDH3A2	ETFB	-1.9752	1.59598	1.19241
ALDH3A2	ETS2	7.03022	1.59598	2.62272
ALDH3A2	FANCA	2.21419	1.59598	1.8814
ALDH3A2	HIST2H2BE	2.3626	1.59598	1.87641
ALDH3A2	HOOK2	1.61928	1.59598	1.16111
ALDH3A2	HS2ST1	2.002	1.59598	1.4323
ALDH3A2	KDELR2	2.10917	1.59598	1.23989
ALDH3A2	KIAA0355	1.77525	1.59598	1.41989
ALDH3A2	LPGAT1	1.6081	1.59598	1.16316
ALDH3A2	LSM6	1.86448	1.59598	1.17053
ALDH3A2	MALT1	-2.1771	1.59598	1.40905
ALDH3A2	MAN2A2	-2.35847	1.59598	2.05594
ALDH3A2	MCOLN1	2.14813	1.59598	2.02064
ALDH3A2	MICALL1	2.55957	1.59598	1.32787
ALDH3A2	MLEC	-2.8105	1.59598	1.7095
ALDH3A2	MVP	2.0039	1.59598	1.98196
ALDH3A2	MYC	-2.4423	1.59598	1.91918
ALDH3A2	NIT1	-1.5991	1.59598	1.57474
ALDH3A2	PDLIM1	-1.91703	1.59598	1.68681
ALDH3A2	PEX19	2.02683	1.59598	1.8047
ALDH3A2	PSRC1	1.6404	1.59598	1.09906
ALDH3A2	PXN	-2.3531	1.59598	1.87825
ALDH3A2	RAP1GAP	1.6192	1.59598	1.06153
ALDH3A2	RRAGA	1.73435	1.59598	1.21324
ALDH3A2	SLC35A1	-2.45423	1.59598	1.3257
ALDH3A2	SORBS3	1.6476	1.59598	1.23413
ALDH3A2	SPDEF	-1.7232	1.59598	1.59019
ALDH3A2	STXBP1	2.03623	1.59598	1.03891
ALDH3A2	SYNGR3	2.05417	1.59598	1.72068
ALDH3A2	THAP11	-4.0429	1.59598	1.88461
ALDH3A2	TIAM1	2.0336	1.59598	1.06496
ALDH3A2	TIMM9	-1.8213	1.59598	1.7176
ALDH3A2	TRIB1	1.73365	1.59598	1.62548
ALDH3A2	TSTA3	1.80275	1.59598	1.03136
ALDH3A2	TTF1	-2.3231	1.59598	1.8947
ALDH3A2	USP7	2.20713	1.59598	1.50071
ALDH3A2	WDTC1	2.48772	1.59598	1.82857
ALDH3B2	CAT	-1.06252	0.914165	0.960342
ALDH3B2	MALT1	-1.85983	0.914165	1.40905
ALDH3B2	ME2	1.10365	0.914165	1.055
ALDH3B2	MSRA	1.7515	0.914165	1.56295
ALDH3B2	NCAPD2	-1.47957	0.914165	1.32274
ALDH3B2	TIMM9	-1.8602	0.914165	1.7176
ALDH5A1	ASCC3	1.61385	1.32309	1.23666
ALDH5A1	ATMIN	1.35535	1.32309	1.0747
ALDH5A1	ATP1B1	2.0271	1.32309	1.98032
ALDH5A1	BHLHE40	2.00385	1.32309	1.86956
ALDH5A1	CNPY3	1.65848	1.32309	1.41671
ALDH5A1	CXCR4	2.22907	1.32309	1.22167
ALDH5A1	ELOVL6	1.6258	1.32309	1.60838
ALDH5A1	ETFB	-1.35	1.32309	1.19241
ALDH5A1	H2AFV	1.99883	1.32309	1.3544
ALDH5A1	HMG20B	-1.8615	1.32309	1.71552
ALDH5A1	MALT1	-1.8922	1.32309	1.40905
ALDH5A1	NARFL	1.3665	1.32309	1.35679
ALDH5A1	NVL	1.51333	1.32309	1.30356
ALDH5A1	PHKA1	1.4392	1.32309	1.15064
ALDH5A1	PTPRF	1.65057	1.32309	1.26763
ALDH5A1	PTPRK	1.9322	1.32309	1.65412
ALDH5A1	RFNG	2.59455	1.32309	1.55813
ALDH5A1	SLC1A4	-1.4717	1.32309	1.22917
ALDH5A1	SLC2A6	2.0554	1.32309	1.69052
ALDH5A1	TES	2.18225	1.32309	1.68268
ALDH5A1	TSKU	-1.4002	1.32309	1.27981
ALDH5A1	UFM1	1.9474	1.32309	1.43249
ALDH5A1	VAPB	1.41108	1.32309	1.12901
ALDH5A1	VPS28	2.937	1.32309	1.62433
ALDH5A1	ZNF589	-1.5554	1.32309	1.12932
ALDH6A1	ACBD3	1.79855	0.92434	1.42511
ALDH6A1	BHLHE40	2.99275	0.92434	1.86956
ALDH6A1	BLMH	-1.3579	0.92434	1.23525
ALDH6A1	BNIP3	-1.40127	0.92434	1.20031
ALDH6A1	CASC3	-1.3968	0.92434	1.13347
ALDH6A1	CASK	1.39597	0.92434	1.31372
ALDH6A1	CD97	1.734	0.92434	1.37815
ALDH6A1	CDK1	-2.0134	0.92434	1.85058
ALDH6A1	CDK2	-1.6255	0.92434	1.32164
ALDH6A1	CNDP2	-1.3068	0.92434	1.07578
ALDH6A1	FAM20B	1.24128	0.92434	1.09119
ALDH6A1	GMNN	-2.18753	0.92434	1.72067
ALDH6A1	HMGCS1	1.5635	0.92434	1.51038
ALDH6A1	KCNK1	1.38098	0.92434	1.21977
ALDH6A1	KIAA1033	1.3388	0.92434	1.12852
ALDH6A1	KIF14	-1.72298	0.92434	1.49681
ALDH6A1	MALT1	-1.81713	0.92434	1.40905
ALDH6A1	MAP4K4	1.61755	0.92434	1.03338
ALDH6A1	MCOLN1	2.3832	0.92434	2.02064
ALDH6A1	POLD4	1.6607	0.92434	1.54693
ALDH6A1	POLE2	-2.03861	0.92434	2.02572
ALDH6A1	PPARG	2.35071	0.92434	1.74884
ALDH6A1	S100A4	1.87481	0.92434	1.49591
ALDH6A1	SCCPDH	1.3649	0.92434	1.34219
ALDH6A1	SLC1A4	-1.61	0.92434	1.22917
ALDH6A1	TIMP2	1.9519	0.92434	1.91805
ALDH6A1	TSTA3	1.59395	0.92434	1.03136
ALDH6A1	VPS28	1.7869	0.92434	1.62433
ALDH7A1	ACOT9	1.38339	1.18707	1.22468
ALDH7A1	ALDH7A1	-1.82005	1.18707	1.17979
ALDH7A1	CCNB1	-2.5981	1.18707	1.486
ALDH7A1	CDC25A	-1.8103	1.18707	1.28884
ALDH7A1	DNTTIP2	1.20804	1.18707	1.13932
ALDH7A1	EGF	1.53583	1.18707	1.11518
ALDH7A1	EGR1	1.5738	1.18707	0.725055
ALDH7A1	EPHB2	2.34137	1.18707	0.939295
ALDH7A1	GATA3	-1.54505	1.18707	1.23287
ALDH7A1	GNAI1	1.56218	1.18707	1.19771
ALDH7A1	MAP4K4	1.29497	1.18707	1.03338
ALDH7A1	NUP85	-1.6089	1.18707	1.38828
ALDH7A1	PAK6	1.39323	1.18707	0.914275
ALDH7A1	POLR2I	-1.32776	1.18707	1.09246
ALDH7A1	PRKAG2	1.30568	1.18707	0.967668
ALDH7A1	PSMD2	-1.88287	1.18707	1.07042
ALDH7A1	RALGDS	-2.15328	1.18707	1.48909
ALDH7A1	RELB	1.89162	1.18707	1.5877
ALDH7A1	RPIA	-1.48269	1.18707	1.46433
ALDH7A1	SLC27A3	-1.4109	1.18707	1.19846
ALDH7A1	TBP	1.55207	1.18707	0.802147
ALDH7A1	TSPAN4	-1.7206	1.18707	1.57424
ALDH7A1	UGDH	-1.5837	1.18707	1.53466
ALDH7A1	VDAC1	-1.30675	1.18707	1.16158
ALDH9A1	ANKRD10	1.18485	1.00148	1.1126
ALDH9A1	CCDC85B	-1.6751	1.00148	1.24642
ALDH9A1	CD14	-5.03097	1.00148	3.15572
ALDH9A1	GSTM2	-1.09025	1.00148	1.01076
ALDH9A1	HTATSF1	-1.4415	1.00148	1.18656
ALDH9A1	PRPF6	3.6783	1.00148	2.85058
ALDH9A1	PYCR1	-1.6549	1.00148	1.49172
ALDH9A1	TBXA2R	-1.95565	1.00148	1.42372
ALDOC	CDK4	-1.754	1.40518	1.32981
ALDOC	CDK6	-1.41282	1.40518	1.3479
ALDOC	DRAP1	1.41247	1.40518	1.36462
ALDOC	HOXA10	1.9806	1.40518	1.31672
ALDOC	IL1RAP	2.053	1.40518	2.05257
ALDOC	KIAA0528	-1.46724	1.40518	1.16454
ALDOC	LRP4	1.9955	1.40518	1.96311
ALDOC	MBOAT7	1.77075	1.40518	1.62353
ALDOC	MRPL12	-1.6824	1.40518	1.42131
ALDOC	PCNA	-3.0403	1.40518	1.64934
ALDOC	PGM1	1.45208	1.40518	1.35633
ALDOC	PRKAG2	2.43995	1.40518	0.967668
ALDOC	PSMF1	1.54108	1.40518	1.0331
ALDOC	SERTAD3	1.81588	1.40518	1.79721
ALDOC	SPP1	-1.78522	1.40518	1.30804
ALDOC	TRIB1	1.62878	1.40518	1.62548
ALDOC	ZBTB5	2.55692	1.40518	1.95474
ALDOC	ZW10	1.48696	1.40518	1.25989
ALG9	ARHGEF2	1.80836	1.38141	1.4072
ALG9	ENOSF1	1.52467	1.38141	1.15893
ALG9	FBRS	1.92553	1.38141	1.52822
ALG9	GPER	1.67945	1.38141	1.61959
ALG9	KIAA0355	1.67885	1.38141	1.41989
ALG9	MALT1	1.53549	1.38141	1.40905
ALG9	PCBD1	2.9334	1.38141	1.7115
ALG9	PDIA5	1.39368	1.38141	1.03971
ALG9	PGM1	1.81098	1.38141	1.35633
ALG9	RNH1	1.5331	1.38141	1.40122
ALG9	SPAG4	1.56153	1.38141	1.03126
ALG9	SYPL1	1.9086	1.38141	1.59639
ALG9	TERF2IP	1.7427	1.38141	1.71159
ALK	CCDC85B	1.4513	1.21219	1.24642
ALK	EZH2	-2.2182	1.21219	1.44881
ALK	FAM20B	1.43762	1.21219	1.09119
ALK	HDGFRP3	-1.26355	1.21219	1.08663
ALK	ITGB1BP1	-1.71207	1.21219	1.60965
ALK	KDM5B	1.2276	1.21219	1.10335
ALK	MSRA	-1.87982	1.21219	1.56295
ALK	PAFAH1B3	-1.4238	1.21219	1.38299
ALK	POLG2	1.6009	1.21219	1.32161
ALK	SPTLC2	1.81387	1.21219	1.44593
ALK	TMEM109	-1.75577	1.21219	1.32587
ALK	XBP1	-1.6528	1.21219	1.6396
ALMS1	CASP10	1.35273	0.915822	1.14797
ALMS1	CASP7	-1.2333	0.915822	0.98047
ALMS1	CDCA4	-2.279	0.915822	1.97909
ALMS1	CDK2	-1.82573	0.915822	1.32164
ALMS1	CDKN1B	-1.5873	0.915822	1.49843
ALMS1	CFLAR	1.28367	0.915822	1.08229
ALMS1	CLIC4	-1.3147	0.915822	1.19428
ALMS1	DCK	-2.50287	0.915822	1.87543
ALMS1	EIF4EBP1	-1.40952	0.915822	1.34213
ALMS1	HOMER2	-1.41936	0.915822	1.27221
ALMS1	HPRT1	-1.8272	0.915822	1.70512
ALMS1	KIF5C	2.33325	0.915822	1.55506
ALMS1	MAN2B1	1.29482	0.915822	1.27322
ALMS1	MCOLN1	2.24081	0.915822	2.02064
ALMS1	PAN2	-1.44845	0.915822	1.27661
ALMS1	PSIP1	-1.93063	0.915822	1.73122
ALMS1	PWP1	-1.59317	0.915822	1.25267
ALMS1	SCYL3	0.92853	0.915822	0.83721
ALMS1	SLC37A4	-1.5297	0.915822	1.38278
ALMS1	SRC	2.5285	0.915822	2.25308
ALMS1	STAT3	1.35625	0.915822	1.12666
ALMS1	TFDP1	-1.43693	0.915822	1.32409
ALMS1	XPO7	-1.06605	0.915822	0.945465
ALMS1	ZDHHC6	-1.72204	0.915822	1.4847
AMDHD2	APPBP2	1.3591	0.863432	1.31445
AMDHD2	ARID4B	-1.4784	0.863432	1.35588
AMDHD2	CCDC90A	1.55473	0.863432	1.5318
AMDHD2	FYN	0.9126	0.863432	0.880051
AMDHD2	HLA-DRA	-1.10168	0.863432	0.927203
AMDHD2	MBNL2	1.66208	0.863432	1.61849
AMDHD2	NFKBIA	1.68872	0.863432	1.41764
AMDHD2	PLSCR3	1.37157	0.863432	1.24087
AMDHD2	PWP1	-1.4094	0.863432	1.25267
AMDHD2	SLC11A2	1.49179	0.863432	1.33842
AMDHD2	SLC37A4	-1.81423	0.863432	1.38278
AMDHD2	TIAM1	-1.42916	0.863432	1.06496
AMDHD2	TMEM109	-1.65846	0.863432	1.32587
AMDHD2	USP6NL	-1.42868	0.863432	1.28687
ANKRD10	CASP7	1.27822	0.964267	0.98047
ANKRD10	CBLB	1.27111	0.964267	1.17342
ANKRD10	CD320	-1.72223	0.964267	1.50159
ANKRD10	CLTB	1.5934	0.964267	1.41653
ANKRD10	HIST1H2BK	-1.758	0.964267	1.5663
ANKRD10	MFSD10	2.71543	0.964267	1.9531
ANKRD10	MSH6	-2.0484	0.964267	1.6543
ANKRD10	PECR	-1.12352	0.964267	1.02178
ANKRD49	ACAT2	-1.4168	1.34202	1.33524
ANKRD49	CCNB2	-3.02493	1.34202	2.15591
ANKRD49	CDKN1A	2.5049	1.34202	1.95615
ANKRD49	CERK	1.41818	1.34202	1.38998
ANKRD49	CISD1	1.73943	1.34202	1.03569
ANKRD49	COPS7A	-2.50317	1.34202	1.31558
ANKRD49	CTNND1	1.44963	1.34202	1.29276
ANKRD49	DCK	-1.99674	1.34202	1.87543
ANKRD49	DERA	-1.56775	1.34202	1.41452
ANKRD49	DNAJB2	2.10902	1.34202	1.6374
ANKRD49	EIF4EBP1	-1.71996	1.34202	1.34213
ANKRD49	EIF5	-1.90193	1.34202	1.1534
ANKRD49	EXOSC4	-1.42931	1.34202	1.24222
ANKRD49	G3BP1	-1.98937	1.34202	1.44492
ANKRD49	GATA3	-1.55427	1.34202	1.23287
ANKRD49	HAT1	-1.60807	1.34202	1.44927
ANKRD49	HMG20B	-2.8149	1.34202	1.71552
ANKRD49	HOXA10	1.54836	1.34202	1.31672
ANKRD49	HSPA4	1.54253	1.34202	1.26107
ANKRD49	IPO13	2.23029	1.34202	2.01774
ANKRD49	ITGAE	-1.44385	1.34202	1.41437
ANKRD49	ITGB1BP1	-1.68006	1.34202	1.60965
ANKRD49	KIF20A	-2.11192	1.34202	2.06133
ANKRD49	MRPS16	-1.4467	1.34202	1.40058
ANKRD49	MSH6	-1.66303	1.34202	1.6543
ANKRD49	MTHFD2	-1.4288	1.34202	1.25656
ANKRD49	MYLK	1.44835	1.34202	1.09857
ANKRD49	NOTCH1	1.68482	1.34202	1.45928
ANKRD49	NRAS	-1.63563	1.34202	1.29175
ANKRD49	PAFAH1B3	-1.78768	1.34202	1.38299
ANKRD49	PAPD7	1.4437	1.34202	0.915037
ANKRD49	PARP2	-2.11872	1.34202	1.63176
ANKRD49	PCCB	-1.9365	1.34202	1.49233
ANKRD49	PEX11A	1.50925	1.34202	1.07841
ANKRD49	PHGDH	-2.52083	1.34202	1.82082
ANKRD49	PLS1	-1.39397	1.34202	1.1008
ANKRD49	POLE2	-2.37745	1.34202	2.02572
ANKRD49	PRR7	-1.87207	1.34202	1.24565
ANKRD49	PSMD9	-1.53768	1.34202	0.788739
ANKRD49	PWP1	-1.3481	1.34202	1.25267
ANKRD49	RELB	1.65162	1.34202	1.5877
ANKRD49	RFC2	-1.98193	1.34202	1.82264
ANKRD49	SUV39H1	-1.97333	1.34202	1.59382
ANKRD49	TCERG1	-1.75156	1.34202	1.26111
ANKRD49	TESK1	1.85887	1.34202	1.48546
ANKRD49	TEX10	-1.3914	1.34202	1.27962
ANKRD49	TLE1	1.5237	1.34202	1.16911
ANKRD49	TNFRSF21	2.31397	1.34202	1.9702
ANKRD49	UBE3C	-1.43427	1.34202	1.14626
ANKRD49	UTP14A	-2.26568	1.34202	1.21376
ANKRD49	VDAC1	-1.6702	1.34202	1.16158
ANKRD55	BHLHE40	1.96492	0.908608	1.86956
ANKRD55	CEBPD	1.09089	0.908608	1.08755
ANKZF1	ARNT2	2.5763	2.33875	1.9532
ANKZF1	CSNK2A2	2.68188	2.33875	1.54975
ANKZF1	FAT1	3.111	2.33875	2.12536
ANKZF1	GADD45B	2.41863	2.33875	1.08042
ANKZF1	KIF14	-2.89013	2.33875	1.49681
ANKZF1	MVP	2.49775	2.33875	1.98196
ANKZF1	POLG2	2.5055	2.33875	1.32161
ANKZF1	SLC2A6	2.4825	2.33875	1.69052
ANKZF1	TMEM110	2.87982	2.33875	1.32583
ANKZF1	UBE2L6	2.37873	2.33875	1.81525
ANO10	ADRB2	-1.36149	1.26962	1.33973
ANO10	ALAS1	2.31587	1.26962	1.57257
ANO10	AMDHD2	1.49242	1.26962	1.42483
ANO10	ATP11B	1.58138	1.26962	1.50524
ANO10	AURKA	-1.37801	1.26962	1.29787
ANO10	CAMSAP1L1	1.614	1.26962	1.46471
ANO10	CASP10	2.07035	1.26962	1.14797
ANO10	CCNB2	-2.2867	1.26962	2.15591
ANO10	CCNF	-1.75325	1.26962	1.48362
ANO10	CD97	1.69817	1.26962	1.37815
ANO10	CDCA4	-2.48721	1.26962	1.97909
ANO10	CERK	1.45085	1.26962	1.38998
ANO10	CLTC	-3.7606	1.26962	3.11268
ANO10	CORO1A	1.80483	1.26962	1.22178
ANO10	CREB1	1.65352	1.26962	0.944198
ANO10	CTNND1	1.85035	1.26962	1.29276
ANO10	CTSD	-2.2149	1.26962	1.47682
ANO10	DHDDS	1.96355	1.26962	1.30573
ANO10	DNMT3A	1.64055	1.26962	1.27243
ANO10	DUSP11	1.44303	1.26962	1.1247
ANO10	EPHA3	1.46945	1.26962	1.39015
ANO10	EXT1	2.25627	1.26962	1.67651
ANO10	FBXL12	1.86265	1.26962	1.3037
ANO10	FGFR2	1.86535	1.26962	1.27416
ANO10	FSD1	1.29632	1.26962	1.17741
ANO10	GRB7	2.8574	1.26962	2.18951
ANO10	HAT1	-1.72503	1.26962	1.44927
ANO10	HSPA4	1.59222	1.26962	1.26107
ANO10	IFNAR1	2.26103	1.26962	1.23987
ANO10	IKZF1	3.96395	1.26962	3.23283
ANO10	KIAA1033	-1.58171	1.26962	1.12852
ANO10	KIF20A	-2.42808	1.26962	2.06133
ANO10	MMP2	2.01433	1.26962	1.3153
ANO10	MSH6	-1.9696	1.26962	1.6543
ANO10	NIT1	1.93691	1.26962	1.57474
ANO10	PAFAH1B1	2.14186	1.26962	0.930944
ANO10	PIK3CA	1.77578	1.26962	1.5021
ANO10	PLA2G4A	2.51003	1.26962	1.7311
ANO10	PLEKHM1	1.6845	1.26962	1.64926
ANO10	PNP	-1.56523	1.26962	1.32791
ANO10	PTGS2	1.95745	1.26962	0.775922
ANO10	PTPLAD1	1.39156	1.26962	1.35019
ANO10	SHB	1.29963	1.26962	1.28006
ANO10	SHC1	1.66647	1.26962	1.32909
ANO10	SLC11A2	1.77123	1.26962	1.33842
ANO10	SNX7	1.762	1.26962	1.52956
ANO10	SUV39H1	-1.75759	1.26962	1.59382
ANO10	TCTA	1.49265	1.26962	1.26316
ANO10	TESK1	1.4995	1.26962	1.48546
ANO10	TLR4	2.41027	1.26962	2.37465
ANO10	TNFRSF21	2.14277	1.26962	1.9702
ANO10	TRIM2	1.59385	1.26962	1.35489
ANO10	UBE2L6	2.12557	1.26962	1.81525
ANO10	UBE3B	1.94516	1.26962	1.22895
ANO10	ZNF395	1.86667	1.26962	1.69737
ANO10	ZNF586	1.92682	1.26962	1.84576
ANXA1	ADCK3	-1.34783	1.04174	1.25826
ANXA1	ASCC3	1.23795	1.04174	1.23666
ANXA1	CD14	-4.81277	1.04174	3.15572
ANXA1	HDAC6	1.44673	1.04174	1.29332
ANXA1	PLA2G15	1.84722	1.04174	1.65814
ANXA1	PRKCD	-1.2906	1.04174	1.25387
ANXA1	PRPF6	3.6411	1.04174	2.85058
ANXA1	TBXA2R	-1.85315	1.04174	1.42372
ANXA5	ADH5	-1.3566	1.29923	1.27183
ANXA5	B3GNT1	1.5262	1.29923	1.32801
ANXA5	BHLHE40	2.92888	1.29923	1.86956
ANXA5	BRP44	-1.3511	1.29923	1.34838
ANXA5	C2CD2L	2.31691	1.29923	1.15874
ANXA5	CASC3	-1.45513	1.29923	1.13347
ANXA5	CCNA2	-2.4143	1.29923	2.21852
ANXA5	CDK1	-2.16823	1.29923	1.85058
ANXA5	CYTH1	1.4883	1.29923	1.37699
ANXA5	DCTD	-1.45195	1.29923	1.29905
ANXA5	EZH2	-1.46737	1.29923	1.44881
ANXA5	FEZ2	1.71973	1.29923	1.11478
ANXA5	FUT1	2.27362	1.29923	1.51174
ANXA5	GAPDH	1.3274	1.29923	1.28027
ANXA5	GMNN	-2.58003	1.29923	1.72067
ANXA5	GRHPR	-2.31907	1.29923	2.1155
ANXA5	HN1L	1.5519	1.29923	1.52693
ANXA5	HS2ST1	1.62728	1.29923	1.4323
ANXA5	JUN	2.28333	1.29923	1.90057
ANXA5	KIAA0355	2.2639	1.29923	1.41989
ANXA5	KIF14	-1.95657	1.29923	1.49681
ANXA5	KIF2C	-1.69727	1.29923	1.47296
ANXA5	LYPLA1	-2.4193	1.29923	1.41715
ANXA5	MACF1	1.5596	1.29923	1.1061
ANXA5	MALT1	1.52776	1.29923	1.40905
ANXA5	MCOLN1	2.07157	1.29923	2.02064
ANXA5	NNT	1.3445	1.29923	1.17942
ANXA5	NUP88	-1.51	1.29923	1.31002
ANXA5	PCCB	-1.747	1.29923	1.49233
ANXA5	PDIA5	1.36311	1.29923	1.03971
ANXA5	PDLIM1	1.7359	1.29923	1.68681
ANXA5	PPIF	-3.40203	1.29923	2.51
ANXA5	REEP5	-1.74903	1.29923	1.39069
ANXA5	RPL39L	-1.61818	1.29923	1.41474
ANXA5	RSU1	1.52645	1.29923	1.26409
ANXA5	SLC25A4	1.5537	1.29923	1.24885
ANXA5	SLC2A6	1.693	1.29923	1.69052
ANXA5	SLC5A6	1.5514	1.29923	1.24537
ANXA5	SMC4	-2.3025	1.29923	1.56563
ANXA5	THAP11	2.08345	1.29923	1.88461
ANXA5	TPM1	1.831	1.29923	1.29102
ANXA5	UBE2C	-2.646	1.29923	1.94566
ANXA5	USP1	-1.69715	1.29923	1.49007
ANXA5	USP22	-1.6752	1.29923	1.62488
ANXA5	ZFP36	1.7863	1.29923	1.70612
ANXA5	ZNF318	2.5183	1.29923	1.46295
ANXA7	AKR7A2	-1.2001	0.980699	1.19406
ANXA7	ANXA7	-2.61375	0.980699	1.07661
ANXA7	DNM1L	1.1879	0.980699	1.13917
ANXA7	FAS	-1.44	0.980699	1.43124
ANXA7	FPGS	-1.15005	0.980699	1.14764
ANXA7	HEATR1	-1.55477	0.980699	1.30562
ANXA7	MAPK13	-1.39164	0.980699	1.18631
ANXA7	MAPKAPK3	-1.05649	0.980699	0.979787
ANXA7	MBNL2	1.79632	0.980699	1.61849
ANXA7	PFKL	-1.29913	0.980699	1.26126
ANXA7	TBC1D9B	1.56411	0.980699	1.52448
ANXA7	TNFRSF21	2.22675	0.980699	1.9702
ANXA7	TSPAN6	-1.37703	0.980699	1.05121
ANXA7	VGLL4	1.6459	0.980699	1.60268
AP1B1	ATG3	1.25178	1.08888	1.16589
AP1B1	CFLAR	-1.28441	1.08888	1.08229
AP1B1	HOOK2	-1.16497	1.08888	1.16111
AP1B1	TPD52L2	-1.31843	1.08888	1.20022
AP1B1	YME1L1	-1.46703	1.08888	1.42273
AP4S1	CD14	-4.37403	0.887429	3.15572
AP4S1	ELAVL1	1.44882	0.887429	1.16691
AP4S1	KIAA0355	1.66093	0.887429	1.41989
AP4S1	KTN1	1.912	0.887429	1.87494
AP4S1	NRIP1	-1.8436	0.887429	1.12261
AP4S1	PRPF6	3.6057	0.887429	2.85058
AP4S1	PRSS23	1.8862	0.887429	1.64951
AP4S1	TBXA2R	-1.72419	0.887429	1.42372
APBB2	APBB2	-1.62493	0.819485	1.10138
APBB2	CCDC90A	2.15317	0.819485	1.5318
APBB2	CD58	-1.46617	0.819485	1.32345
APBB2	CDK2	-1.51763	0.819485	1.32164
APBB2	CDK5R1	1.25086	0.819485	0.840261
APBB2	CHMP4A	-1.19253	0.819485	1.13729
APBB2	HLA-DRA	-1.01498	0.819485	0.927203
APBB2	KIF14	1.50497	0.819485	1.49681
APBB2	PAN2	-1.28215	0.819485	1.27661
APBB2	PLSCR3	1.2965	0.819485	1.24087
APBB2	RPA1	-1.48487	0.819485	1.34716
APBB2	SLC11A2	1.43672	0.819485	1.33842
APBB2	ZMIZ1	-1.58187	0.819485	1.42836
APC	ABCF1	1.44717	1.00105	1.20073
APC	ANKRD10	1.60848	1.00105	1.1126
APC	BHLHE40	2.16302	1.00105	1.86956
APC	BPHL	1.31475	1.00105	1.21027
APC	CCDC85B	-1.95163	1.00105	1.24642
APC	DECR1	1.419	1.00105	1.26802
APC	DYNLT3	1.24757	1.00105	1.17502
APC	FAS	1.51742	1.00105	1.43124
APC	MVP	2.33403	1.00105	1.98196
APC	PHGDH	-1.95266	1.00105	1.82082
APC	UBE3B	1.25687	1.00105	1.22895
APPBP2	CDKN2A	2.85602	2.00301	1.7616
APPBP2	IGF2BP2	-2.02992	2.00301	1.6788
APPBP2	SRC	-2.2986	2.00301	2.25308
ARAF	ABHD6	1.90427	1.4738	1.34953
ARAF	ANXA7	-2.09087	1.4738	1.07661
ARAF	BLCAP	-2.32717	1.4738	1.84245
ARAF	CASK	1.7849	1.4738	1.31372
ARAF	CASP3	1.6437	1.4738	1.40138
ARAF	CHERP	-1.63358	1.4738	1.20611
ARAF	CLSTN1	-1.6573	1.4738	1.07499
ARAF	HN1L	1.6725	1.4738	1.52693
ARAF	IARS2	-1.4771	1.4738	1.35742
ARAF	ITGB1BP1	-1.63697	1.4738	1.60965
ARAF	PAFAH1B3	-2.2639	1.4738	1.38299
ARAF	PIP4K2B	1.61193	1.4738	1.1275
ARAF	POLR1C	-1.80185	1.4738	0.90653
ARAF	SPTLC2	2.21879	1.4738	1.44593
ARAF	TRIB1	1.99372	1.4738	1.62548
ARAF	TWF2	-1.7133	1.4738	0.993433
ARAF	ZNF451	1.6006	1.4738	1.33812
ARFIP2	ABAT	2.67095	2.45096	1.97996
ARFIP2	ASAP2	2.98925	2.45096	2.10955
ARFIP2	ASL	2.89352	2.45096	2.06975
ARFIP2	CA12	2.57715	2.45096	2.34273
ARFIP2	CABIN1	2.69753	2.45096	2.26443
ARFIP2	CDKN2A	2.83735	2.45096	1.7616
ARFIP2	CLASRP	2.98925	2.45096	2.10955
ARFIP2	CMPK1	2.5511	2.45096	2.18941
ARFIP2	CTCF	2.6398	2.45096	2.06148
ARFIP2	EIF1B	3.1258	2.45096	2.23137
ARFIP2	ENTPD6	2.52707	2.45096	2.05533
ARFIP2	ERCC1	2.70135	2.45096	2.16439
ARFIP2	ETFA	2.70105	2.45096	2.01208
ARFIP2	FAM3C	3.33248	2.45096	2.84692
ARFIP2	FANCL	2.4659	2.45096	1.67184
ARFIP2	FDX1	2.6511	2.45096	2.06995
ARFIP2	GPR125	2.61095	2.45096	2.09865
ARFIP2	GRHPR	2.59913	2.45096	2.1155
ARFIP2	HIST1H2BD	2.83395	2.45096	2.55887
ARFIP2	HMGCL	2.53982	2.45096	2.05999
ARFIP2	LRP4	2.6244	2.45096	1.96311
ARFIP2	LYPD3	2.63945	2.45096	2.44997
ARFIP2	MGST2	2.9333	2.45096	2.43818
ARFIP2	PLXNA2	2.5329	2.45096	2.05486
ARFIP2	RAD23B	2.8378	2.45096	2.20874
ARFIP2	RTCD1	2.9641	2.45096	2.40789
ARFIP2	SEC14L1	2.64643	2.45096	2.28595
ARFIP2	SETDB1	2.54825	2.45096	2.23036
ARFIP2	SFMBT1	3.15123	2.45096	2.49987
ARFIP2	SGK1	2.53722	2.45096	2.46186
ARFIP2	STAT6	2.7226	2.45096	2.01698
ARFIP2	TARS	2.50145	2.45096	2.06249
ARFIP2	TCIRG1	2.53188	2.45096	2.01824
ARFIP2	TMEM127	2.6858	2.45096	2.09288
ARFIP2	TOMM22	2.62302	2.45096	1.92524
ARFIP2	UBE4A	2.59972	2.45096	2.03918
ARFIP2	UGP2	3.3081	2.45096	2.37623
ARFIP2	ZBTB24	2.62143	2.45096	2.1284
ARG1	ACD	-1.79324	1.00757	1.60158
ARG1	CD58	-1.74918	1.00757	1.32345
ARG1	DNM1	1.18795	1.00757	1.04779
ARG1	DUSP22	-1.38341	1.00757	0.933534
ARG1	FAH	-1.29128	1.00757	1.27175
ARG1	FPGS	-1.77395	1.00757	1.14764
ARG1	GADD45A	2.33057	1.00757	1.87259
ARG1	HIF1A	1.0938	1.00757	1.08406
ARG1	HMOX1	3.10852	1.00757	2.78122
ARG1	HPRT1	-1.8668	1.00757	1.70512
ARG1	IGFBP3	1.59988	1.00757	1.55645
ARG1	MBNL2	1.65665	1.00757	1.61849
ARG1	NFKBIA	2.1371	1.00757	1.41764
ARG1	NOSIP	-1.2006	1.00757	1.04873
ARG1	PFKL	-2.25863	1.00757	1.26126
ARG1	PLA2G4A	1.7449	1.00757	1.7311
ARG1	PNKP	-1.23283	1.00757	1.17845
ARG1	RAI14	2.081	1.00757	1.77986
ARG1	RBM34	1.2024	1.00757	1.1701
ARG1	SESN1	1.56123	1.00757	1.51603
ARG1	SKP1	-1.24495	1.00757	0.91223
ARG1	SLC11A2	1.4414	1.00757	1.33842
ARG1	SLC25A4	1.52272	1.00757	1.24885
ARG1	SNX6	1.29641	1.00757	1.25522
ARG1	TFDP1	-1.47058	1.00757	1.32409
ARG1	TIAM1	-1.99283	1.00757	1.06496
ARG1	TMEM2	-2.2031	1.00757	1.58905
ARG1	TNFRSF21	2.39062	1.00757	1.9702
ARG1	TNIP1	1.70513	1.00757	1.57656
ARG1	TPM1	1.79605	1.00757	1.29102
ARG1	TSPAN4	-2.08573	1.00757	1.57424
ARG1	XBP1	-2.0927	1.00757	1.6396
ARG1	YME1L1	-1.65389	1.00757	1.42273
ARHGAP1	AURKB	-1.09673	1.02447	1.08667
ARHGAP1	AXIN1	-1.20684	1.02447	1.1419
ARHGAP1	BMP4	2.19467	1.02447	1.25527
ARHGAP1	CCND3	1.07448	1.02447	0.953734
ARHGAP1	CDKN2A	2.38222	1.02447	1.7616
ARHGAP1	CHP	-1.4328	1.02447	1.26782
ARHGAP1	CLTC	-3.11497	1.02447	3.11268
ARHGAP1	DUSP3	1.73903	1.02447	1.65349
ARHGAP1	FZD1	1.72277	1.02447	1.30742
ARHGAP1	GHR	1.89427	1.02447	1.55514
ARHGAP1	IKZF1	4.66423	1.02447	3.23283
ARHGAP1	MNAT1	-2.62847	1.02447	1.49572
ARHGAP1	PLCB3	1.41742	1.02447	1.28262
ARHGAP1	PLK1	-3.64173	1.02447	3.11504
ARHGAP1	PRKCQ	1.8534	1.02447	1.74892
ARHGAP1	PROS1	1.60318	1.02447	1.58738
ARHGAP1	SKP1	1.09235	1.02447	0.91223
ARHGAP1	TP53	-1.5072	1.02447	1.39741
ARHGEF2	ABAT	-5.1821	4.69876	1.97996
ARHGEF2	ASAP2	-5.73177	4.69876	2.10955
ARHGEF2	CA12	-5.0106	4.69876	2.34273
ARHGEF2	CABIN1	-4.8768	4.69876	2.26443
ARHGEF2	CLASRP	-5.73177	4.69876	2.10955
ARHGEF2	CMPK1	-5.00517	4.69876	2.18941
ARHGEF2	CTCF	-5.04323	4.69876	2.06148
ARHGEF2	DHPS	-4.7531	4.69876	1.94016
ARHGEF2	EIF1B	-6.18773	4.69876	2.23137
ARHGEF2	ERCC1	-4.78437	4.69876	2.16439
ARHGEF2	ETFA	-5.15033	4.69876	2.01208
ARHGEF2	FAM3C	-6.06837	4.69876	2.84692
ARHGEF2	FDX1	-5.15173	4.69876	2.06995
ARHGEF2	GPR125	-4.9952	4.69876	2.09865
ARHGEF2	GRHPR	-5.00017	4.69876	2.1155
ARHGEF2	HIST1H2BD	-5.5463	4.69876	2.55887
ARHGEF2	LYPD3	-5.84033	4.69876	2.44997
ARHGEF2	MGST2	-5.4038	4.69876	2.43818
ARHGEF2	PLXNA2	-4.7341	4.69876	2.05486
ARHGEF2	PPIF	-4.96777	4.69876	2.51
ARHGEF2	PRPF6	-4.90383	4.69876	2.85058
ARHGEF2	RAD23B	-5.73723	4.69876	2.20874
ARHGEF2	RTCD1	-5.89413	4.69876	2.40789
ARHGEF2	SEC14L1	-5.4163	4.69876	2.28595
ARHGEF2	SFMBT1	-6.04133	4.69876	2.49987
ARHGEF2	SNX2	-4.79937	4.69876	2.08354
ARHGEF2	STAT6	-5.48193	4.69876	2.01698
ARHGEF2	TCIRG1	-5.29073	4.69876	2.01824
ARHGEF2	TMEM127	-4.7802	4.69876	2.09288
ARHGEF2	TOMM22	-5.18297	4.69876	1.92524
ARHGEF2	UBE4A	-4.80297	4.69876	2.03918
ARHGEF2	UGP2	-6.35583	4.69876	2.37623
ARHGEF2	ZBTB24	-4.77233	4.69876	2.1284
ARHGEF5	GRHPR	-4.05185	3.70693	2.1155
ARID4B	CD320	-1.523	0.964001	1.50159
ARID4B	CREB1	1.11505	0.964001	0.944198
ARID4B	CTTN	1.56142	0.964001	1.35525
ARID4B	DNAJC15	-1.43677	0.964001	1.13721
ARID4B	MAN2B1	1.54216	0.964001	1.27322
ARID4B	MAT2A	-4.08483	0.964001	2.28867
ARID4B	MFSD10	2.42253	0.964001	1.9531
ARID4B	MSH6	-1.83737	0.964001	1.6543
ARID4B	SCP2	1.5478	0.964001	1.29219
ARID4B	SLC37A4	-2.25163	0.964001	1.38278
ARID4B	TLR4	3.93317	0.964001	2.37465
ARID4B	TMEM110	-1.45695	0.964001	1.32583
ARID4B	XPO7	-1.00412	0.964001	0.945465
ARID5B	INTS3	1.43614	0.963145	1.22194
ARID5B	PIK3R3	1.7672	0.963145	1.70765
ARID5B	RNF167	-1.91207	0.963145	1.85149
ARID5B	TMEM110	-1.77192	0.963145	1.32583
ARL4C	MYL9	2.04455	1.63192	1.45919
ARNT	BTG3	2.15557	1.93527	2.13719
ARNT	CSNK2A2	2.3322	1.93527	1.54975
ARNT	EGFR	2.90927	1.93527	1.65427
ARNT	GOLIM4	2.2107	1.93527	2.00182
ARNT	IL4R	2.03715	1.93527	1.63454
ARNT	KLHL21	2.30667	1.93527	1.38055
ARNT	LYN	2.07233	1.93527	1.62507
ARNT	MALT1	1.95527	1.93527	1.40905
ARNT	METRN	3.4066	1.93527	2.27809
ARNT	RAB27A	1.96893	1.93527	1.35962
ARNT	SKIV2L	1.97803	1.93527	1.28426
ARNT	TBPL1	2.0831	1.93527	1.18104
ARNT	ZNF274	2.05056	1.93527	1.59421
ARNT2	PPP3CA	-2.61957	2.57345	2.02147
ARNT2	SRF	-2.61957	2.57345	1.82263
ARPP19	AKR7A2	-1.379	0.913875	1.19406
ARPP19	ARPP19	-2.66993	0.913875	1.40644
ARPP19	CREB1	1.18292	0.913875	0.944198
ARPP19	CTNNAL1	-1.2543	0.913875	1.03212
ARPP19	CTTN	1.47668	0.913875	1.35525
ARPP19	DNAJC15	-1.29403	0.913875	1.13721
ARPP19	MFSD10	2.30613	0.913875	1.9531
ARPP19	MSH6	-2.1038	0.913875	1.6543
ARPP19	MYO10	1.37283	0.913875	1.2792
ARPP19	NPRL2	-1.70122	0.913875	1.1578
ARPP19	RNF167	-1.86897	0.913875	1.85149
ASAP2	CSRP1	-1.826	1.09812	1.43706
ASAP2	LSR	-1.338	1.09812	1.23721
ASAP2	SLC35F2	1.1783	1.09812	1.03869
ASCC3	CASP2	-1.29196	1.22719	1.2298
ASCC3	RASA1	1.32603	1.22719	1.20747
ASCC3	SPP1	-1.44509	1.22719	1.30804
ASH2L	ASAH1	2.6993	2.11598	0.673731
ASH2L	CDK6	2.74612	2.11598	1.3479
ASH2L	CDKN2A	2.30535	2.11598	1.7616
ASH2L	CEBPA	2.53492	2.11598	1.23183
ASH2L	CHP	2.12641	2.11598	1.26782
ASH2L	CSDA	-4.11033	2.11598	1.97498
ASH2L	E2F2	2.57598	2.11598	1.49929
ASH2L	EDN1	2.47117	2.11598	0.924045
ASH2L	EPHA3	2.3175	2.11598	1.39015
ASH2L	ETV1	2.26843	2.11598	0.799044
ASH2L	FADD	-2.43503	2.11598	1.61853
ASH2L	GNAI1	3.44711	2.11598	1.19771
ASH2L	HBE1	2.23474	2.11598	1.78891
ASH2L	HLA-DMA	3.0463	2.11598	0.968575
ASH2L	IL1B	2.1876	2.11598	0.988672
ASH2L	JUN	2.78287	2.11598	1.90057
ASH2L	NAA50	-2.20897	2.11598	2.15434
ASH2L	NFKB2	2.17459	2.11598	1.36888
ASH2L	NFKBIB	2.86743	2.11598	0.634635
ASH2L	NR2F6	-2.17735	2.11598	1.25505
ASH2L	PCNA	-2.7961	2.11598	1.64934
ASH2L	PFKL	-2.1685	2.11598	1.26126
ASH2L	PRKCQ	2.733	2.11598	1.74892
ASH2L	PRKX	2.47467	2.11598	0.924919
ASH2L	RPS6	-2.7199	2.11598	0.862976
ASH2L	SEC14L1	2.3578	2.11598	2.28595
ASH2L	SEC24B	-2.13947	2.11598	2.13807
ASH2L	SLC36A1	2.22072	2.11598	2.03261
ASH2L	SNX2	-2.80187	2.11598	2.08354
ASH2L	SPTLC2	2.20522	2.11598	1.44593
ASH2L	STAT3	2.29555	2.11598	1.12666
ASH2L	STAT5B	2.18765	2.11598	1.09706
ASH2L	ZFP161	3.00968	2.11598	1.88038
ASL	AMDHD2	1.82645	1.1265	1.42483
ASL	AURKB	1.31458	1.1265	1.08667
ASL	BTK	6.97913	1.1265	4.53205
ASL	CASP10	1.5228	1.1265	1.14797
ASL	CDC25A	-1.456	1.1265	1.28884
ASL	CDK4	-1.3954	1.1265	1.32981
ASL	DFFA	-1.50665	1.1265	1.1706
ASL	EGR1	1.26307	1.1265	0.725055
ASL	GATA3	-1.75339	1.1265	1.23287
ASL	HAT1	-1.82157	1.1265	1.44927
ASL	IFNAR1	1.32278	1.1265	1.23987
ASL	PAK1	1.16637	1.1265	1.15046
ASL	RAP1GAP	1.21045	1.1265	1.06153
ASL	TERT	1.39533	1.1265	0.830746
ASL	UTP14A	-1.26925	1.1265	1.21376
ASMTL	E2F2	1.65732	0.934764	1.49929
ASMTL	FGFR4	1.12205	0.934764	1.04842
ASMTL	PAK1	1.39203	0.934764	1.15046
ASMTL	PLSCR3	1.25564	0.934764	1.24087
ASMTL	TCTN1	1.54286	0.934764	1.18752
ASMTL	XPO7	-0.99015	0.934764	0.945465
ASNS	BHLHE40	3.00818	0.942791	1.86956
ASNS	CD14	-4.87683	0.942791	3.15572
ASNS	CTSD	-1.5254	0.942791	1.47682
ASNS	GRB10	1.53882	0.942791	1.37864
ASNS	KCTD5	0.95011	0.942791	0.912785
ASNS	KIF14	-1.51455	0.942791	1.49681
ASNS	KTN1	2.0399	0.942791	1.87494
ASNS	MCM3	-1.5267	0.942791	1.47838
ASNS	MRPL19	-2.2923	0.942791	2.16595
ASNS	PRKCD	-1.264	0.942791	1.25387
ASNS	PRPF6	3.6891	0.942791	2.85058
ASNS	TBXA2R	-1.67215	0.942791	1.42372
ATF1	F12	-2.00887	0.895967	1.9298
ATF1	H2AFV	1.47507	0.895967	1.3544
ATF1	KIAA1033	1.56763	0.895967	1.12852
ATF1	SLC1A4	-1.5062	0.895967	1.22917
ATF1	VAPB	1.63788	0.895967	1.12901
ATF1	VPS28	1.7838	0.895967	1.62433
ATF2	CD14	-4.7356	0.97101	3.15572
ATF2	DPH2	-1.33153	0.97101	1.20096
ATF2	EFNB3	-2.21558	0.97101	1.81911
ATF2	FTSJ1	-1.81158	0.97101	1.56538
ATF2	KCNK1	1.22373	0.97101	1.21977
ATF2	KTN1	2.1644	0.97101	1.87494
ATF2	PRPF6	3.517	0.97101	2.85058
ATF2	TATDN2	-1.36517	0.97101	1.02665
ATF2	TBXA2R	-1.76099	0.97101	1.42372
ATF2	TJP1	-1.75375	0.97101	1.07149
ATF2	TRIM2	1.4337	0.97101	1.35489
ATF3	ATMIN	1.23635	0.903455	1.0747
ATF3	BCL2	-1.27702	0.903455	1.14472
ATF3	BNIP3	-1.48393	0.903455	1.20031
ATF3	CCDC85B	-1.95167	0.903455	1.24642
ATF3	FEZ2	1.4734	0.903455	1.11478
ATF3	GMNN	-2.24447	0.903455	1.72067
ATF3	GRHPR	-2.3591	0.903455	2.1155
ATF3	HOXA10	1.88695	0.903455	1.31672
ATF3	MALT1	-1.73463	0.903455	1.40905
ATF3	SCARB1	-1.1737	0.903455	1.15294
ATF3	SPR	-1.5707	0.903455	1.15233
ATF3	TIMM9	-2.1415	0.903455	1.7176
ATF3	TSKU	-1.5687	0.903455	1.27981
ATF4	ARHGEF2	2.60997	1.05058	1.4072
ATF4	BAMBI	-1.3038	1.05058	1.23811
ATF4	BNIP3	-1.34727	1.05058	1.20031
ATF4	CEP57	1.2954	1.05058	1.12149
ATF4	EAPP	1.4839	1.05058	0.977601
ATF4	FOXO4	2.75512	1.05058	1.486
ATF4	H2AFV	1.6327	1.05058	1.3544
ATF4	HIST2H2BE	2.3	1.05058	1.87641
ATF4	LSM5	-2.8463	1.05058	1.51953
ATF4	MALT1	-1.61527	1.05058	1.40905
ATF4	NR2F6	-1.4927	1.05058	1.25505
ATF4	PDS5A	-1.26617	1.05058	1.08739
ATF4	POLR2K	-1.3247	1.05058	1.10764
ATF4	RFNG	1.78795	1.05058	1.55813
ATF4	S100A13	-1.1646	1.05058	1.07475
ATF4	SLC1A4	-1.4394	1.05058	1.22917
ATF4	STUB1	1.4271	1.05058	1.35732
ATF4	TSKU	-1.4287	1.05058	1.27981
ATF4	VPS28	1.9608	1.05058	1.62433
ATF4	WDR7	1.29633	1.05058	1.25098
ATF5	ATF5	-3.13573	0.948759	1.47133
ATF5	LGALS8	-1.65442	0.948759	1.05134
ATF5	MAPK13	-1.19467	0.948759	1.18631
ATF5	NT5DC2	1.56958	0.948759	1.19662
ATF5	PFKL	-1.52993	0.948759	1.26126
ATF5	PYGL	-1.61817	0.948759	1.45016
ATG3	PDGFA	2.67304	2.24467	2.02932
ATG5	ADCK3	2.5497	2.06908	1.25826
ATG5	ALMS1	2.69939	2.06908	1.73388
ATG5	ARL4C	3.0156	2.06908	1.95279
ATG5	ATP1B1	2.1735	2.06908	1.98032
ATG5	BACE2	-2.16417	2.06908	1.57321
ATG5	BAZ2B	2.27635	2.06908	1.91888
ATG5	BTBD3	-2.55178	2.06908	1.76857
ATG5	CASK	2.40615	2.06908	1.31372
ATG5	CD14	4.17836	2.06908	3.15572
ATG5	CEP57	2.2464	2.06908	1.12149
ATG5	CHMP4A	-2.8492	2.06908	1.13729
ATG5	CNPY3	2.14083	2.06908	1.41671
ATG5	CSNK2A2	2.7282	2.06908	1.54975
ATG5	CTSD	-2.3748	2.06908	1.47682
ATG5	EZH2	-2.3245	2.06908	1.44881
ATG5	GFOD1	2.34893	2.06908	1.48638
ATG5	KDM5A	2.1078	2.06908	1.26686
ATG5	MAMLD1	3.24812	2.06908	0.980678
ATG5	MARK4	2.19902	2.06908	1.78594
ATG5	MPDZ	3.16368	2.06908	1.67056
ATG5	MTHFD2	-2.7374	2.06908	1.25656
ATG5	MYC	-2.14817	2.06908	1.91918
ATG5	MYCBP	-2.6146	2.06908	1.31893
ATG5	NAA50	-3.73473	2.06908	2.15434
ATG5	NISCH	-2.51849	2.06908	1.04517
ATG5	PEX19	2.08027	2.06908	1.8047
ATG5	POLE2	-2.41783	2.06908	2.02572
ATG5	PPOX	2.64437	2.06908	1.35677
ATG5	PPP2R3A	3.01863	2.06908	1.82439
ATG5	PRSS23	-3.2693	2.06908	1.64951
ATG5	PYGL	-3.03153	2.06908	1.45016
ATG5	RAB1B	-2.5162	2.06908	1.61496
ATG5	RAB27A	2.07333	2.06908	1.35962
ATG5	SHB	2.7569	2.06908	1.28006
ATG5	SOCS2	2.59147	2.06908	1.6483
ATG5	STMN1	-2.20043	2.06908	1.77977
ATG5	TIMELESS	-2.87603	2.06908	2.08678
ATG5	TIMP2	2.29295	2.06908	1.91805
ATG5	TMEM97	-2.4301	2.06908	1.78867
ATG5	TRIM13	2.73452	2.06908	1.24045
ATG5	ZBTB5	2.15452	2.06908	1.95474
ATG5	ZER1	2.13377	2.06908	1.89132
ATIC	ARNT2	2.06565	1.31312	1.9532
ATIC	CASP3	1.8137	1.31312	1.40138
ATIC	CDK2	1.33373	1.31312	1.32164
ATIC	CNOT4	1.3342	1.31312	1.30028
ATIC	EPRS	1.40085	1.31312	1.23912
ATIC	ETFB	-1.4761	1.31312	1.19241
ATIC	GALE	1.5204	1.31312	1.26792
ATIC	GAPDH	1.3295	1.31312	1.28027
ATIC	HN1L	1.8458	1.31312	1.52693
ATIC	ITGB1BP1	-1.75527	1.31312	1.60965
ATIC	LRPAP1	1.4402	1.31312	1.32598
ATIC	NCAPD2	1.3331	1.31312	1.32274
ATIC	NFIL3	1.69337	1.31312	1.63097
ATIC	NIT1	1.83002	1.31312	1.57474
ATIC	PRAF2	1.5183	1.31312	1.3967
ATIC	PRKCD	-1.38765	1.31312	1.25387
ATIC	RBM6	2.24693	1.31312	1.18955
ATIC	RFX5	1.64167	1.31312	1.35541
ATIC	SPTLC2	1.79975	1.31312	1.44593
ATIC	THAP11	2.48675	1.31312	1.88461
ATIC	ZNF451	1.3959	1.31312	1.33812
ATM	B3GNT1	1.38395	1.10357	1.32801
ATM	CEBPD	1.87355	1.10357	1.08755
ATM	HDAC2	-1.72047	1.10357	1.37121
ATM	IKBKE	1.5247	1.10357	1.492
ATM	MYC	-2.0099	1.10357	1.91918
ATM	TBXA2R	-1.56475	1.10357	1.42372
ATMIN	DOK4	-3.18273	2.3805	1.59119
ATMIN	EIF1B	2.51123	2.3805	2.23137
ATMIN	ETFA	2.47768	2.3805	2.01208
ATMIN	MGST2	2.46253	2.3805	2.43818
ATMIN	PDGFA	3.30484	2.3805	2.02932
ATMIN	RAD23B	2.42333	2.3805	2.20874
ATMIN	RTCD1	2.443	2.3805	2.40789
ATMIN	SLC36A1	2.54335	2.3805	2.03261
ATMIN	UGP2	2.58587	2.3805	2.37623
ATMIN	WRN	-2.9139	2.3805	1.44456
ATP11B	AMDHD2	1.997	1.10443	1.42483
ATP11B	CERK	1.73248	1.10443	1.38998
ATP11B	CGRRF1	-1.2891	1.10443	0.971878
ATP11B	COG7	-1.32157	1.10443	1.28737
ATP11B	DCK	-2.06284	1.10443	1.87543
ATP11B	EVL	1.52526	1.10443	1.48812
ATP11B	GTF2A2	-1.15095	1.10443	1.12231
ATP11B	IKBKAP	-1.25878	1.10443	1.08633
ATP11B	LIPA	-1.66573	1.10443	1.19164
ATP11B	MAPKAPK2	-1.8286	1.10443	1.69056
ATP11B	MICALL1	1.69787	1.10443	1.32787
ATP11B	NOTCH1	1.80142	1.10443	1.45928
ATP11B	NT5DC2	-1.61795	1.10443	1.19662
ATP11B	PARP2	-2.27739	1.10443	1.63176
ATP11B	PKIG	-1.29472	1.10443	1.04966
ATP11B	PTK2B	1.3207	1.10443	0.955151
ATP11B	RFC2	-1.85213	1.10443	1.82264
ATP11B	SCCPDH	1.3905	1.10443	1.34219
ATP11B	TPD52L2	-1.2529	1.10443	1.20022
ATP11B	TRAPPC6A	1.479	1.10443	1.44226
ATP11B	ZMIZ1	-1.44033	1.10443	1.42836
ATP1A1	CD14	-4.2977	0.888019	3.15572
ATP1A1	DCTD	-1.47283	0.888019	1.29905
ATP1A1	PDIA5	1.12072	0.888019	1.03971
ATP1A1	PRPF6	3.5188	0.888019	2.85058
ATP1A1	TBXA2R	-1.44309	0.888019	1.42372
ATP1A3	ATG3	-1.2249	0.934848	1.16589
ATP1A3	CBR1	-1.07071	0.934848	0.943556
ATP1A3	CDC45	-2.33194	0.934848	1.81572
ATP1A3	CDK7	-1.3214	0.934848	1.18761
ATP1A3	DCUN1D4	1.21435	0.934848	1.16291
ATP1A3	DERA	1.43368	0.934848	1.41452
ATP1A3	GNAS	3.6865	0.934848	3.26368
[truncated: 25,730 more rows]

## Sheet: Indirect regulation (LINCS 96H)
MiRNA	Perturbagen	Phase II Score	Percentile Rank (%)	Num Target (All)	Num Target (WithExp)	Selected NMI	Best pFET	Adjusted pFET	Passed Cutoff
hsa-miR-15b-5p	RAF1	1	0.000189126	47	47	0.122367	6.329e-09	2.975e-07	1
hsa-miR-940	PTK2	0.561	95.7704	32	32	0.123046	1.849e-08	5.917e-07	1
hsa-miR-214-3p	SCAF8	0.716	84.5374	6	6	0.084473	1.816e-07	1.09e-06	1
hsa-miR-340-5p	CDK4	0.945	60.3862	29	29	0.075341	5.528e-08	1.603e-06	1
hsa-miR-204-5p	FOXJ3	1	0.000189126	7	7	0.095698	2.409e-07	1.686e-06	1
hsa-miR-217	FOXJ3	0.511	99.3216	7	7	0.099776	3.524e-07	2.467e-06	1
hsa-miR-548y	CDK4	1	0.000189126	29	29	0.065541	1.288e-07	3.735e-06	1
hsa-miR-454-3p	BTG1	0.995	41.8528	30	30	0.118964	2.175e-07	6.525e-06	1
hsa-miR-616-5p	USP7	0.972	53.8807	56	54	0.086434	1.219e-07	6.583e-06	1
hsa-miR-548b-5p	CDK4	1	0.000189126	29	29	0.096183	2.693e-07	7.81e-06	1
hsa-miR-143-3p	ELK1	0.903	67.2952	14	14	0.064831	5.617e-07	7.864e-06	1
hsa-miR-106a-3p	SEC24B	1	0.000189126	2	2	0.130826	4.425e-06	8.85e-06	1
hsa-miR-9-5p	CDK4	0.621	91.328	29	29	0.148562	3.367e-07	9.764e-06	1
hsa-miR-142-5p	CDK4	0.944	60.5676	29	29	0.088656	3.885e-07	1.127e-05	1
hsa-miR-216b	CDK4	1	0.000189126	29	29	0.055115	3.934e-07	1.141e-05	1
hsa-miR-375	DCUN1D4	0.929	63.3578	19	19	0.07099	6.926e-07	1.316e-05	1
hsa-miR-1243	APPBP2	1	0.000189126	3	3	0.114883	4.425e-06	1.328e-05	1
hsa-miR-141-3p	APPBP2	1	0.000189126	3	3	0.167516	4.425e-06	1.328e-05	1
hsa-miR-15b-5p	CMPK1	0.551	96.3922	3	3	0.171714	4.425e-06	1.328e-05	1
hsa-miR-20a-5p	CMPK1	1	0.000189126	3	3	0.229483	4.425e-06	1.328e-05	1
hsa-miR-23a-3p	APPBP2	1	0.000189126	3	3	0.158316	4.425e-06	1.328e-05	1
hsa-miR-33a-3p	APPBP2	0.995	41.8528	3	3	0.138428	4.425e-06	1.328e-05	1
hsa-miR-519a-5p	APPBP2	1	0.000189126	3	3	0.277496	4.425e-06	1.328e-05	1
hsa-miR-934	CMPK1	0.901	67.5479	3	3	0.364761	4.425e-06	1.328e-05	1
hsa-miR-548j	FOXJ3	0.625	91.07	7	7	0.063315	2.017e-06	1.412e-05	1
hsa-miR-144-3p	FOXJ3	0.999	30.3054	7	7	0.104789	2.054e-06	1.438e-05	1
hsa-miR-301b	RAF1	0.678	87.829	47	47	0.143799	3.766e-07	1.77e-05	1
hsa-miR-548a-5p	CDK4	1	0.000189126	29	29	0.077815	6.73e-07	1.952e-05	1
hsa-miR-516a-5p	CALR	1	0.000189126	14	14	0.177684	1.428e-06	1.999e-05	1
hsa-miR-301a-3p	RAF1	0.913	66.0282	47	47	0.126149	4.286e-07	2.014e-05	1
hsa-miR-182-3p	FOXJ3	0.995	41.8528	7	7	0.076296	3.326e-06	2.328e-05	1
hsa-miR-421	USP7	0.993	43.8171	56	54	0.088443	4.385e-07	2.368e-05	1
hsa-miR-130b-5p	EPAS1	0.95	59.4113	37	37	0.138174	6.682e-07	2.472e-05	1
hsa-miR-15b-5p	NOTCH2	0.968	55.3873	35	35	0.122367	7.178e-07	2.512e-05	1
hsa-miR-425-3p	PPP1CC	1	0.000189126	35	35	0.090761	7.357e-07	2.575e-05	1
hsa-miR-216b	NONO	1	0.000189126	24	24	0.060558	1.133e-06	2.719e-05	1
hsa-miR-548o-3p	FOXJ3	0.993	43.8171	7	7	0.061862	4.119e-06	2.883e-05	1
hsa-miR-335-3p	NOTCH2	0.815	76.9535	35	35	0.09862	8.426e-07	2.949e-05	1
hsa-miR-3143	SEC24B	1	0.000189126	2	2	0.086519	1.475e-05	2.95e-05	1
hsa-miR-93-5p	EPAS1	0.968	55.3873	37	37	0.141059	8.607e-07	3.185e-05	1
hsa-miR-18a-5p	MBNL1	1	0.000189126	4	4	0.300246	8.849e-06	3.54e-05	1
hsa-miR-19b-3p	SOX4	1	0.000189126	4	4	0.212669	8.849e-06	3.54e-05	1
hsa-miR-203	SOX4	1	0.000189126	4	4	0.172723	8.849e-06	3.54e-05	1
hsa-miR-20a-5p	SOX4	1	0.000189126	4	4	0.229483	8.849e-06	3.54e-05	1
hsa-miR-31-5p	SOX4	0.967	55.6329	4	4	0.223384	8.849e-06	3.54e-05	1
hsa-miR-452-3p	SOX4	1	0.000189126	4	4	0.270566	8.849e-06	3.54e-05	1
hsa-miR-500a-5p	SOX4	0.709	84.9919	4	4	0.187016	8.849e-06	3.54e-05	1
hsa-miR-548v	SOX4	1	0.000189126	4	4	0.139097	8.849e-06	3.54e-05	1
hsa-miR-582-5p	SOX4	0.723	84.0527	4	4	0.184973	8.849e-06	3.54e-05	1
hsa-miR-20b-5p	EPAS1	0.923	64.1831	37	37	0.106851	9.627e-07	3.562e-05	1
hsa-miR-16-2-3p	CLK4	0.983	50.1019	29	29	0.109661	1.266e-06	3.671e-05	1
hsa-miR-636	PPP1CC	1	0.000189126	35	35	0.071027	1.088e-06	3.808e-05	1
hsa-miR-675-3p	PPP1CC	0.561	95.7704	35	35	0.069462	1.088e-06	3.808e-05	1
hsa-miR-376a-3p	FOXJ3	0.869	71.7164	7	7	0.068445	5.48e-06	3.836e-05	1
hsa-miR-19a-5p	USP7	0.945	60.3862	56	54	0.074116	7.28e-07	3.931e-05	1
hsa-let-7d-5p	APPBP2	0.964	56.4165	3	3	0.165286	1.327e-05	3.981e-05	1
hsa-let-7f-2-3p	APPBP2	0.825	76.1828	3	3	0.131406	1.327e-05	3.981e-05	1
hsa-miR-105-5p	CMPK1	0.995	41.8528	3	3	0.2888	1.327e-05	3.981e-05	1
hsa-miR-106a-5p	CMPK1	0.978	52.0323	3	3	0.201045	1.327e-05	3.981e-05	1
hsa-miR-1237	APPBP2	0.991	45.6945	3	3	0.132835	1.327e-05	3.981e-05	1
hsa-miR-1248	APPBP2	1	0.000189126	3	3	0.165439	1.327e-05	3.981e-05	1
hsa-miR-130a-3p	CMPK1	1	0.000189126	3	3	0.184372	1.327e-05	3.981e-05	1
hsa-miR-130a-5p	APPBP2	1	0.000189126	3	3	0.17128	1.327e-05	3.981e-05	1
hsa-miR-138-5p	APPBP2	0.96	57.3267	3	3	0.233765	1.327e-05	3.981e-05	1
hsa-miR-16-5p	CMPK1	0.538	97.2028	3	3	0.137572	1.327e-05	3.981e-05	1
hsa-miR-32-3p	APPBP2	0.789	78.9198	3	3	0.128433	1.327e-05	3.981e-05	1
hsa-miR-374b-3p	APPBP2	1	0.000189126	3	3	0.13267	1.327e-05	3.981e-05	1
hsa-miR-421	APPBP2	0.998	35.422	3	3	0.152647	1.327e-05	3.981e-05	1
hsa-miR-548l	APPBP2	0.936	62.2593	3	3	0.109762	1.327e-05	3.981e-05	1
hsa-miR-590-3p	APPBP2	0.717	84.4637	3	3	0.178241	1.327e-05	3.981e-05	1
hsa-miR-767-5p	APPBP2	0.535	97.3872	3	3	0.272293	1.327e-05	3.981e-05	1
hsa-miR-767-5p	CMPK1	1	0.000189126	3	3	0.272293	1.327e-05	3.981e-05	1
hsa-miR-873-5p	APPBP2	0.832	75.08	3	3	0.135974	1.327e-05	3.981e-05	1
hsa-miR-9-3p	CMPK1	0.905	67.048	3	3	0.247491	1.327e-05	3.981e-05	1
hsa-miR-98	APPBP2	0.937	62.0904	3	3	0.14953	1.327e-05	3.981e-05	1
hsa-miR-19a-3p	RAF1	0.897	68.0241	47	47	0.164485	1.041e-06	4.893e-05	1
hsa-miR-589-3p	KLF5	1	0.000189126	33	33	0.091795	1.596e-06	5.267e-05	1
hsa-miR-15b-5p	SUZ12	1	0.000189126	52	52	0.120003	1.026e-06	5.335e-05	1
hsa-miR-548n	SOX4	0.98	51.2666	4	4	0.051015	1.347e-05	5.388e-05	1
hsa-miR-16-5p	SCAF8	0.773	80.0996	6	6	0.092814	9.275e-06	5.565e-05	1
hsa-miR-543	FOXJ3	0.515	99.0763	7	7	0.060674	8.183e-06	5.728e-05	1
hsa-miR-19b-1-5p	CDK4	0.987	48	29	29	0.121687	2.02e-06	5.858e-05	1
hsa-miR-93-5p	NONO	1	0.000189126	24	24	0.193597	2.46e-06	5.904e-05	1
hsa-miR-130b-3p	BTG1	0.689	87.1523	30	30	0.113192	2.039e-06	6.117e-05	1
hsa-miR-181a-2-3p	FOXJ3	1	0.000189126	7	7	0.09332	8.834e-06	6.184e-05	1
hsa-miR-181c-5p	SEC24B	0.852	73.306	2	2	0.122431	3.097e-05	6.194e-05	1
hsa-miR-548k	SEC24B	0.62	91.3991	2	2	0.114823	3.097e-05	6.194e-05	1
hsa-miR-643	SEC24B	0.72	84.2657	2	2	0.103158	3.097e-05	6.194e-05	1
hsa-miR-145-3p	FOXJ3	0.503	99.8137	7	7	0.074338	9.175e-06	6.423e-05	1
hsa-miR-1258	FOXJ3	1	0.000189126	7	7	0.084597	9.378e-06	6.565e-05	1
hsa-miR-3652	FOXJ3	0.994	42.9842	7	7	0.076956	9.925e-06	6.948e-05	1
hsa-miR-20b-5p	ESR1	0.529	98.195	43	43	0.123735	1.694e-06	7.284e-05	1
hsa-miR-15b-5p	SMAD7	0.999	30.3054	23	23	0.107754	3.394e-06	7.806e-05	1
hsa-miR-101-5p	CMPK1	1	0.000189126	3	3	0.119081	2.652e-05	7.956e-05	1
hsa-miR-217	APPBP2	0.719	84.3379	3	3	0.139845	2.652e-05	7.956e-05	1
hsa-miR-27b-3p	APPBP2	0.999	30.3054	3	3	0.132681	2.652e-05	7.956e-05	1
hsa-miR-29c-3p	CMPK1	0.641	90.1032	3	3	0.131667	2.652e-05	7.956e-05	1
hsa-miR-320d	CMPK1	0.969	55.1026	3	3	0.130147	2.652e-05	7.956e-05	1
hsa-miR-3662	APPBP2	0.669	88.396	3	3	0.14858	2.652e-05	7.956e-05	1
hsa-miR-378a-5p	APPBP2	0.997	38.6214	3	3	0.166968	2.652e-05	7.956e-05	1
hsa-miR-424-5p	CMPK1	1	0.000189126	3	3	0.139118	2.652e-05	7.956e-05	1
hsa-miR-548b-5p	APPBP2	0.533	97.9234	3	3	0.134207	2.652e-05	7.956e-05	1
hsa-miR-580	APPBP2	1	0.000189126	3	3	0.119874	2.652e-05	7.956e-05	1
hsa-miR-676-3p	CMPK1	1	0.000189126	3	3	0.131874	2.652e-05	7.956e-05	1
hsa-miR-9-5p	APPBP2	0.994	42.9842	3	3	0.252078	2.652e-05	7.956e-05	1
hsa-miR-488-3p	PPP1CC	1	0.000189126	35	35	0.094843	2.292e-06	8.022e-05	1
hsa-miR-183-3p	SEC24B	1	0.000189126	2	2	0.117936	4.13e-05	8.26e-05	1
hsa-miR-194-5p	SEC24B	0.946	60.1907	2	2	0.115964	4.13e-05	8.26e-05	1
hsa-miR-96-5p	FOXJ3	0.996	40.3642	7	7	0.071714	1.19e-05	8.33e-05	1
hsa-miR-493-5p	SCAF8	1	0.000189126	6	6	0.076658	1.396e-05	8.376e-05	1
hsa-miR-450b-5p	PPP1CC	1	0.000189126	35	35	0.064629	2.397e-06	8.39e-05	1
hsa-miR-19a-3p	DICER1	1	0.000189126	10	10	0.163	8.547e-06	8.547e-05	1
hsa-miR-616-5p	KLF5	0.571	95.1673	33	33	0.08754	2.723e-06	8.986e-05	1
hsa-miR-497-5p	FOXJ3	0.998	35.422	7	7	0.070395	1.379e-05	9.653e-05	1
hsa-let-7b-5p	IKBKE	0.917	65.0227	6	6	0.081412	1.648e-05	9.888e-05	1
hsa-miR-16-1-3p	PPP1CC	0.997	38.6214	35	35	0.064209	2.914e-06	0.000102	1
hsa-miR-518b	FOXJ3	0.743	82.7428	7	7	0.11241	1.476e-05	0.0001033	1
hsa-miR-891a	FOXJ3	0.545	96.7652	7	7	0.09368	1.476e-05	0.0001033	1
hsa-let-7d-5p	SOX4	1	0.000189126	4	4	0.165286	2.652e-05	0.0001061	1
hsa-let-7g-5p	SOX4	0.818	76.7188	4	4	0.133508	2.652e-05	0.0001061	1
hsa-miR-106a-5p	SOX4	1	0.000189126	4	4	0.201045	2.652e-05	0.0001061	1
hsa-miR-130a-3p	SOX4	1	0.000189126	4	4	0.184372	2.652e-05	0.0001061	1
hsa-miR-183-3p	SOX4	1	0.000189126	4	4	0.1331	2.652e-05	0.0001061	1
hsa-miR-188-5p	MBNL1	0.978	52.0323	4	4	0.181446	2.652e-05	0.0001061	1
hsa-miR-19a-3p	SOX4	1	0.000189126	4	4	0.235392	2.652e-05	0.0001061	1
hsa-miR-25-5p	SOX4	0.866	72.0169	4	4	0.142396	2.652e-05	0.0001061	1
hsa-miR-29a-5p	SOX4	0.986	48.4564	4	4	0.141453	2.652e-05	0.0001061	1
hsa-miR-30e-5p	SOX4	0.999	30.3054	4	4	0.163543	2.652e-05	0.0001061	1
hsa-miR-3605-5p	SOX4	1	0.000189126	4	4	0.154364	2.652e-05	0.0001061	1
hsa-miR-362-3p	SOX4	0.998	35.422	4	4	0.158212	2.652e-05	0.0001061	1
hsa-miR-374b-5p	SOX4	1	0.000189126	4	4	0.132467	2.652e-05	0.0001061	1
hsa-miR-421	SOX4	1	0.000189126	4	4	0.152647	2.652e-05	0.0001061	1
hsa-miR-500a-3p	SOX4	1	0.000189126	4	4	0.183294	2.652e-05	0.0001061	1
hsa-miR-501-5p	MBNL1	0.944	60.5676	4	4	0.186267	2.652e-05	0.0001061	1
hsa-miR-505-3p	MBNL1	1	0.000189126	4	4	0.23487	2.652e-05	0.0001061	1
hsa-miR-518c-5p	SOX4	0.996	40.3642	4	4	0.186762	2.652e-05	0.0001061	1
hsa-miR-519b-3p	SOX4	0.94	61.6104	4	4	0.091253	2.652e-05	0.0001061	1
hsa-miR-548d-3p	MBNL1	1	0.000189126	4	4	0.196178	2.652e-05	0.0001061	1
hsa-miR-548f	MBNL1	1	0.000189126	4	4	0.150028	2.652e-05	0.0001061	1
hsa-miR-548s	SOX4	1	0.000189126	4	4	0.178045	2.652e-05	0.0001061	1
hsa-miR-590-3p	SOX4	1	0.000189126	4	4	0.178241	2.652e-05	0.0001061	1
hsa-miR-767-5p	SOX4	0.915	65.3245	4	4	0.272293	2.652e-05	0.0001061	1
hsa-miR-9-3p	SOX4	1	0.000189126	4	4	0.247491	2.652e-05	0.0001061	1
hsa-miR-92a-3p	SOX4	0.845	73.9144	4	4	0.190729	2.652e-05	0.0001061	1
hsa-miR-181b-5p	SEC24B	0.886	69.2789	2	2	0.122346	5.309e-05	0.0001062	1
hsa-miR-361-5p	SEC24B	0.864	72.2049	2	2	0.102331	5.309e-05	0.0001062	1
hsa-miR-216b	PHB2	1	0.000189126	53	53	0.060558	2.061e-06	0.0001092	1
hsa-miR-454-3p	DICER1	0.993	43.8171	10	10	0.118718	1.148e-05	0.0001148	1
hsa-miR-548b-5p	DICER1	1	0.000189126	10	10	0.096183	1.148e-05	0.0001148	1
hsa-miR-30d-3p	FOXJ3	0.974	53.3216	7	7	0.083364	1.701e-05	0.0001191	1
hsa-miR-3607-3p	FOXJ3	0.545	96.7652	7	7	0.07535	1.708e-05	0.0001196	1
hsa-miR-495	MAP3K4	1	0.000189126	7	7	0.080051	1.726e-05	0.0001208	1
hsa-miR-181a-2-3p	NR3C1	1	0.000189126	9	9	0.086558	1.386e-05	0.0001247	1
hsa-miR-508-3p	FOXJ3	1	0.000189126	7	7	0.104335	1.79e-05	0.0001253	1
hsa-miR-92a-1-5p	DICER1	0.849	73.5655	10	10	0.137951	1.257e-05	0.0001257	1
hsa-miR-27a-3p	FOXJ3	1	0.000189126	7	7	0.078436	1.819e-05	0.0001273	1
hsa-miR-708-5p	FOXJ3	0.999	30.3054	7	7	0.066923	1.819e-05	0.0001273	1
hsa-miR-512-3p	CALR	1	0.000189126	14	14	0.126235	9.114e-06	0.0001276	1
hsa-miR-216b	CLK4	1	0.000189126	29	29	0.056743	4.438e-06	0.0001287	1
hsa-miR-15b-5p	DICER1	0.999	30.3054	10	10	0.120003	1.321e-05	0.0001321	1
hsa-miR-106a-3p	APPBP2	0.986	48.4564	3	3	0.129086	4.417e-05	0.0001325	1
hsa-miR-106a-3p	CMPK1	0.998	35.422	3	3	0.129086	4.417e-05	0.0001325	1
hsa-miR-128	APPBP2	1	0.000189126	3	3	0.128966	4.417e-05	0.0001325	1
hsa-miR-1298	APPBP2	0.766	81.1377	3	3	0.051041	4.417e-05	0.0001325	1
hsa-miR-183-5p	APPBP2	0.936	62.2593	3	3	0.127655	4.417e-05	0.0001325	1
hsa-miR-27a-3p	APPBP2	1	0.000189126	3	3	0.150704	4.417e-05	0.0001325	1
hsa-miR-320c	CMPK1	0.978	52.0323	3	3	0.117205	4.417e-05	0.0001325	1
hsa-miR-33a-5p	APPBP2	0.988	47.4918	3	3	0.15326	4.417e-05	0.0001325	1
hsa-miR-3613-5p	APPBP2	1	0.000189126	3	3	0.128413	4.417e-05	0.0001325	1
hsa-miR-3942-5p	APPBP2	0.979	51.6176	3	3	0.104021	4.417e-05	0.0001325	1
hsa-miR-491-5p	APPBP2	1	0.000189126	3	3	0.126836	4.417e-05	0.0001325	1
hsa-miR-2278	SEC24B	0.66	88.9426	2	2	0.074894	6.637e-05	0.0001327	1
hsa-miR-543	SEC24B	1	0.000189126	2	2	0.100112	6.637e-05	0.0001327	1
hsa-miR-548t-5p	SEC24B	0.51	99.3797	2	2	0.089407	6.637e-05	0.0001327	1
hsa-miR-143-3p	SCAF8	0.877	70.3655	6	6	0.067633	2.262e-05	0.0001357	1
hsa-miR-3164	BAG6	0.768	80.9961	37	37	0.053131	3.691e-06	0.0001366	1
hsa-miR-154-5p	PPP1CC	0.993	43.8171	35	35	0.062606	3.936e-06	0.0001378	1
hsa-miR-15b-5p	EIF2B2	0.651	89.4744	29	29	0.120003	4.795e-06	0.0001391	1
hsa-miR-124-3p	CDK4	1	0.000189126	29	29	0.048618	4.849e-06	0.0001406	1
hsa-miR-618	ELK1	0.911	66.3066	14	14	0.100557	1.041e-05	0.0001457	1
hsa-miR-548d-3p	RAF1	1	0.000189126	47	47	0.144714	3.153e-06	0.0001482	1
hsa-miR-18a-5p	RAF1	1	0.000189126	47	47	0.233667	3.196e-06	0.0001502	1
hsa-miR-205-3p	FOXJ3	0.903	67.2952	7	7	0.077272	2.169e-05	0.0001518	1
hsa-miR-335-3p	FOXJ3	0.902	67.4195	7	7	0.083257	2.228e-05	0.000156	1
hsa-miR-421	KLF5	0.634	90.5255	33	33	0.093176	4.765e-06	0.0001572	1
hsa-miR-3934	VAMP7	0.999	30.3054	43	43	0.088893	3.676e-06	0.0001581	1
hsa-miR-7-5p	PTK2	1	0.000189126	32	32	0.124994	4.956e-06	0.0001586	1
hsa-miR-211-5p	FOXJ3	1	0.000189126	7	7	0.054844	2.297e-05	0.0001608	1
hsa-miR-1224-5p	SEC24B	0.524	98.5155	2	2	0.142694	8.112e-05	0.0001622	1
hsa-miR-494	SEC24B	0.935	62.4278	2	2	0.110669	8.112e-05	0.0001622	1
hsa-miR-548j	SEC24B	1	0.000189126	2	2	0.096557	8.112e-05	0.0001622	1
hsa-miR-377-3p	FOXJ3	0.999	30.3054	7	7	0.06755	2.381e-05	0.0001667	1
hsa-miR-3143	FGFR2	0.975	52.9929	10	10	0.060727	1.714e-05	0.0001714	1
hsa-miR-1229	KLF5	0.581	94.5622	33	33	0.101524	5.232e-06	0.0001727	1
hsa-miR-20a-3p	DICER1	0.996	40.3642	10	10	0.146707	1.73e-05	0.000173	1
hsa-miR-186-5p	PHB2	0.995	41.8528	53	53	0.140996	3.44e-06	0.0001823	1
hsa-miR-3127-5p	UNC13B	0.999	30.3054	23	23	0.116159	8.095e-06	0.0001862	1
hsa-miR-554	NONO	0.979	51.6176	24	24	0.015333	7.788e-06	0.0001869	1
hsa-miR-487a	SCAF8	0.986	48.4564	6	6	0.057996	3.141e-05	0.0001885	1
hsa-miR-374b-3p	SEC24B	0.955	58.4189	2	2	0.10319	9.734e-05	0.0001947	1
hsa-miR-380-5p	SEC24B	0.981	50.9165	2	2	0.091761	9.734e-05	0.0001947	1
hsa-miR-133a	FOXJ3	0.605	93.0717	7	7	0.087922	2.784e-05	0.0001949	1
hsa-miR-513c-5p	FOXJ3	1	0.000189126	7	7	0.056246	2.784e-05	0.0001949	1
hsa-miR-4326	NOTCH2	0.858	72.7596	35	35	0.098234	5.61e-06	0.0001963	1
hsa-miR-19b-3p	DICER1	1	0.000189126	10	10	0.134737	1.968e-05	0.0001968	1
hsa-miR-1288	APPBP2	0.58	94.625	3	3	0.105086	6.622e-05	0.0001987	1
hsa-miR-144-3p	APPBP2	0.994	42.9842	3	3	0.139885	6.622e-05	0.0001987	1
hsa-miR-200a-3p	APPBP2	1	0.000189126	3	3	0.135912	6.622e-05	0.0001987	1
hsa-miR-20b-5p	CMPK1	0.978	52.0323	3	3	0.148542	6.622e-05	0.0001987	1
hsa-miR-2276	APPBP2	0.861	72.4825	3	3	0.114635	6.622e-05	0.0001987	1
hsa-miR-23b-3p	APPBP2	1	0.000189126	3	3	0.121688	6.622e-05	0.0001987	1
hsa-miR-3065-5p	APPBP2	1	0.000189126	3	3	0.144566	6.622e-05	0.0001987	1
hsa-miR-556-3p	APPBP2	1	0.000189126	3	3	0.116879	6.622e-05	0.0001987	1
hsa-miR-760	CMPK1	1	0.000189126	3	3	0.125745	6.622e-05	0.0001987	1
hsa-miR-199a-3p	MAP3K4	0.991	45.6945	7	7	0.129962	2.862e-05	0.0002003	1
hsa-miR-199b-3p	MAP3K4	0.991	45.6945	7	7	0.129981	2.862e-05	0.0002003	1
hsa-miR-214-3p	MAP3K4	0.763	81.4199	7	7	0.12742	2.862e-05	0.0002003	1
hsa-miR-1915-3p	EIF4A2	0.982	50.4983	32	32	0.065341	6.282e-06	0.000201	1
hsa-miR-548f	SMAD1	1	0.000189126	17	17	0.079732	1.189e-05	0.0002021	1
hsa-miR-495	SCAF8	0.997	38.6214	6	6	0.1162	3.382e-05	0.0002029	1
hsa-miR-744-3p	BTG1	0.75	82.284	30	30	0.094013	6.779e-06	0.0002034	1
hsa-miR-545-3p	PPP1CC	0.845	73.9144	35	35	0.061087	5.827e-06	0.0002039	1
hsa-miR-19b-3p	RAF1	0.888	69.0573	47	47	0.141221	4.343e-06	0.0002041	1
hsa-miR-19b-3p	EIF4A2	1	0.000189126	32	32	0.079411	6.516e-06	0.0002085	1
hsa-let-7a-3p	SOX4	0.998	35.422	4	4	0.128791	5.297e-05	0.0002119	1
hsa-miR-129-5p	SOX4	0.93	63.2023	4	4	0.178529	5.297e-05	0.0002119	1
hsa-miR-135b-3p	SOX4	1	0.000189126	4	4	0.311755	5.297e-05	0.0002119	1
hsa-miR-186-5p	MBNL1	1	0.000189126	4	4	0.18432	5.297e-05	0.0002119	1
hsa-miR-301b	MBNL1	1	0.000189126	4	4	0.194624	5.297e-05	0.0002119	1
hsa-miR-32-5p	SOX4	1	0.000189126	4	4	0.137594	5.297e-05	0.0002119	1
hsa-miR-320d	SOX4	1	0.000189126	4	4	0.130147	5.297e-05	0.0002119	1
hsa-miR-335-3p	SOX4	0.994	42.9842	4	4	0.147824	5.297e-05	0.0002119	1
hsa-miR-340-5p	SOX4	0.993	43.8171	4	4	0.123961	5.297e-05	0.0002119	1
hsa-miR-3613-3p	SOX4	0.995	41.8528	4	4	0.108427	5.297e-05	0.0002119	1
hsa-miR-3620	MBNL1	1	0.000189126	4	4	0.152942	5.297e-05	0.0002119	1
hsa-miR-3662	SOX4	0.998	35.422	4	4	0.14858	5.297e-05	0.0002119	1
hsa-miR-374a-5p	SOX4	1	0.000189126	4	4	0.127766	5.297e-05	0.0002119	1
hsa-miR-3920	SOX4	0.866	72.0169	4	4	0.131227	5.297e-05	0.0002119	1
hsa-miR-548d-3p	SOX4	0.999	30.3054	4	4	0.193446	5.297e-05	0.0002119	1
hsa-miR-877-3p	MBNL1	0.501	99.9372	4	4	0.157069	5.297e-05	0.0002119	1
hsa-miR-877-5p	MBNL1	0.998	35.422	4	4	0.192362	5.297e-05	0.0002119	1
hsa-miR-93-3p	MBNL1	1	0.000189126	4	4	0.191454	5.297e-05	0.0002119	1
hsa-miR-3614-5p	PHB2	1	0.000189126	53	53	0.099865	4.021e-06	0.0002131	1
hsa-miR-425-3p	PHB2	0.996	40.3642	53	53	0.092308	4.021e-06	0.0002131	1
hsa-miR-578	CSK	0.979	51.6176	7	7	0.05841	3.053e-05	0.0002137	1
hsa-miR-203	FOXJ3	1	0.000189126	7	7	0.101995	3.057e-05	0.000214	1
hsa-miR-455-3p	CALR	1	0.000189126	14	14	0.12587	1.559e-05	0.0002183	1
hsa-miR-494	PPP1CC	0.982	50.4983	35	35	0.080072	6.245e-06	0.0002186	1
hsa-miR-942	NOTCH2	0.513	99.2049	35	35	0.131911	6.245e-06	0.0002186	1
hsa-miR-517a-3p	FOXJ3	0.96	57.3267	7	7	0.1164	3.149e-05	0.0002204	1
hsa-miR-517b-3p	FOXJ3	0.987	48	7	7	0.1164	3.149e-05	0.0002204	1
hsa-miR-208b	EIF4A2	0.602	93.2556	32	32	0.032432	6.932e-06	0.0002218	1
hsa-miR-301a-3p	DICER1	0.999	30.3054	10	10	0.142616	2.232e-05	0.0002232	1
hsa-miR-15b-3p	RGS2	1	0.000189126	9	9	0.126774	2.547e-05	0.0002292	1
hsa-miR-182-5p	SEC24B	0.961	57.1053	2	2	0.097825	0.000115	0.00023	1
hsa-miR-191-5p	SEC24B	1	0.000189126	2	2	0.107953	0.000115	0.00023	1
hsa-miR-96-5p	SEC24B	1	0.000189126	2	2	0.110306	0.000115	0.00023	1
hsa-miR-106b-5p	EPAS1	0.995	41.8528	37	37	0.15247	6.362e-06	0.0002354	1
hsa-miR-15a-5p	SUZ12	0.996	40.3642	52	52	0.077769	4.562e-06	0.0002372	1
hsa-miR-101-5p	FOXJ3	0.543	96.8889	7	7	0.073789	3.627e-05	0.0002539	1
hsa-miR-543	CSNK2A2	1	0.000189126	5	5	0.063532	5.083e-05	0.0002541	1
hsa-miR-323a-3p	PPP1CC	1	0.000189126	35	35	0.067271	7.295e-06	0.0002553	1
hsa-miR-3926	PPP1CC	1	0.000189126	35	35	0.050689	7.295e-06	0.0002553	1
hsa-miR-545-3p	CDK4	1	0.000189126	29	29	0.059188	8.809e-06	0.0002555	1
hsa-miR-1304-5p	CDK4	0.763	81.4199	29	29	0.08493	9.146e-06	0.0002652	1
hsa-miR-676-5p	RGS2	0.532	97.9896	9	9	0.077349	2.97e-05	0.0002673	1
hsa-miR-218-5p	PPP1CC	0.956	58.1657	35	35	0.06459	7.667e-06	0.0002683	1
hsa-miR-210	SEC24B	0.814	77.0316	2	2	0.147408	0.0001342	0.0002684	1
hsa-miR-425-5p	SEC24B	0.999	30.3054	2	2	0.103987	0.0001342	0.0002684	1
hsa-miR-514a-3p	FOXJ3	0.981	50.9165	7	7	0.094935	3.839e-05	0.0002687	1
hsa-miR-205-3p	VPS26A	0.713	84.7343	5	5	0.070893	5.407e-05	0.0002704	1
hsa-let-7a-2-3p	SCAF8	0.997	38.6214	6	6	0.106158	4.596e-05	0.0002758	1
hsa-miR-320e	KDM5B	1	0.000189126	8	8	0.070252	3.46e-05	0.0002768	1
hsa-miR-410	FOXJ3	0.657	89.1158	7	7	0.072228	3.963e-05	0.0002774	1
hsa-miR-145-5p	APPBP2	0.779	79.647	3	3	0.119342	9.265e-05	0.000278	1
hsa-miR-17-5p	CMPK1	1	0.000189126	3	3	0.236575	9.265e-05	0.000278	1
hsa-miR-20b-3p	APPBP2	0.678	87.829	3	3	0.143372	9.265e-05	0.000278	1
hsa-miR-3115	APPBP2	0.871	71.5275	3	3	0.090079	9.265e-05	0.000278	1
hsa-miR-331-3p	APPBP2	1	0.000189126	3	3	0.112529	9.265e-05	0.000278	1
hsa-miR-3654	APPBP2	0.958	57.7506	3	3	0.129901	9.265e-05	0.000278	1
hsa-miR-584-5p	APPBP2	0.959	57.5439	3	3	0.240958	9.265e-05	0.000278	1
hsa-miR-20a-5p	NONO	0.999	30.3054	24	24	0.178284	1.16e-05	0.0002784	1
hsa-miR-181c-5p	IRS2	0.712	84.7982	36	36	0.073013	7.876e-06	0.0002835	1
hsa-miR-3613-3p	FOXJ3	0.653	89.3469	7	7	0.056328	4.086e-05	0.000286	1
hsa-miR-381	SCAF8	0.978	52.0323	6	6	0.078588	4.784e-05	0.000287	1
hsa-miR-495	STK39	0.908	66.6779	32	32	0.069684	9.025e-06	0.0002888	1
hsa-miR-15b-5p	BMPR1A	1	0.000189126	21	21	0.079702	1.391e-05	0.0002921	1
hsa-miR-3161	CEBPG	0.637	90.3514	46	46	0.110637	6.397e-06	0.0002943	1
hsa-miR-195-5p	FOXJ3	0.996	40.3642	7	7	0.068967	4.213e-05	0.0002949	1
hsa-miR-411-3p	MAP3K4	1	0.000189126	7	7	0.065733	4.264e-05	0.0002985	1
hsa-miR-7-1-3p	PAFAH1B1	0.997	38.6214	12	11	0.082949	2.716e-05	0.0002988	1
hsa-miR-889	SCAF8	0.899	67.7898	6	6	0.115696	5.035e-05	0.0003021	1
hsa-miR-496	SRF	0.988	47.4918	7	7	0.083815	4.341e-05	0.0003039	1
hsa-miR-1269a	SEC24B	0.979	51.6176	2	2	0.227691	0.0001549	0.0003098	1
hsa-miR-542-3p	SEC24B	0.889	68.9627	2	2	0.113803	0.0001549	0.0003098	1
hsa-miR-15a-5p	RAF1	1	0.000189126	47	47	0.075623	6.672e-06	0.0003136	1
hsa-miR-301b	BTG1	0.644	89.9181	30	30	0.108319	1.048e-05	0.0003144	1
hsa-miR-548b-5p	MTF2	0.994	42.9842	57	57	0.049334	5.588e-06	0.0003185	1
hsa-miR-548f	INPPL1	0.964	56.4165	36	36	0.090619	8.866e-06	0.0003192	1
hsa-miR-125b-2-3p	SCAF8	0.587	94.1972	6	6	0.07341	5.327e-05	0.0003196	1
hsa-miR-26b-3p	PPP1CC	0.997	38.6214	35	35	0.053433	9.145e-06	0.0003201	1
hsa-miR-493-5p	SRF	0.926	63.7746	7	7	0.076658	4.589e-05	0.0003212	1
hsa-miR-3193	SCAF8	0.774	80.0186	6	6	0.095082	5.371e-05	0.0003223	1
hsa-miR-3919	SRF	0.988	47.4918	7	7	0.067052	4.711e-05	0.0003298	1
hsa-miR-708-5p	SCAF8	0.729	83.6695	6	6	0.067631	5.616e-05	0.000337	1
hsa-miR-324-3p	KLF5	1	0.000189126	33	33	0.088434	1.037e-05	0.0003422	1
hsa-miR-548q	PDS5B	0.855	73.0233	56	56	0.0532	6.266e-06	0.0003509	1
hsa-miR-129-2-3p	SOX4	1	0.000189126	4	4	0.157655	8.819e-05	0.0003528	1
hsa-miR-183-5p	SOX4	0.959	57.5439	4	4	0.127655	8.819e-05	0.0003528	1
hsa-miR-18b-5p	MBNL1	1	0.000189126	4	4	0.19883	8.819e-05	0.0003528	1
hsa-miR-221-5p	SOX4	1	0.000189126	4	4	0.136033	8.819e-05	0.0003528	1
hsa-miR-30c-5p	SOX4	0.999	30.3054	4	4	0.123059	8.819e-05	0.0003528	1
hsa-miR-3138	SOX4	0.508	99.5005	4	4	0.093297	8.819e-05	0.0003528	1
hsa-miR-320c	SOX4	0.996	40.3642	4	4	0.117205	8.819e-05	0.0003528	1
hsa-miR-320e	SOX4	0.998	35.422	4	4	0.122596	8.819e-05	0.0003528	1
hsa-miR-3684	SOX4	0.996	40.3642	4	4	0.120657	8.819e-05	0.0003528	1
hsa-miR-369-3p	SOX4	1	0.000189126	4	4	0.126738	8.819e-05	0.0003528	1
hsa-miR-500a-5p	MBNL1	0.999	30.3054	4	4	0.165024	8.819e-05	0.0003528	1
hsa-miR-500b	MBNL1	1	0.000189126	4	4	0.163408	8.819e-05	0.0003528	1
hsa-miR-519a-3p	SOX4	0.923	64.1831	4	4	0.079113	8.819e-05	0.0003528	1
hsa-miR-550a-5p	SOX4	0.537	97.2626	4	4	0.146392	8.819e-05	0.0003528	1
hsa-miR-590-5p	MBNL1	1	0.000189126	4	4	0.186278	8.819e-05	0.0003528	1
hsa-miR-641	SOX4	1	0.000189126	4	4	0.09169	8.819e-05	0.0003528	1
hsa-miR-154-5p	SEC24B	0.652	89.4116	2	2	0.101733	0.000177	0.000354	1
hsa-miR-664-3p	SEC24B	0.999	30.3054	2	2	0.106674	0.000177	0.000354	1
hsa-miR-944	SCAF8	1	0.000189126	6	6	0.086676	5.916e-05	0.000355	1
hsa-miR-877-5p	DICER1	0.968	55.3873	10	10	0.1367	3.575e-05	0.0003575	1
hsa-miR-376c	SRF	1	0.000189126	7	7	0.079741	5.12e-05	0.0003584	1
hsa-miR-323a-3p	PIK3C2B	0.986	48.4564	18	17	0.078964	2.11e-05	0.0003587	1
hsa-let-7f-5p	APPBP2	1	0.000189126	3	3	0.111476	0.0001235	0.0003705	1
hsa-miR-10b-3p	APPBP2	0.889	68.9627	3	3	0.119224	0.0001235	0.0003705	1
hsa-miR-1179	APPBP2	0.999	30.3054	3	3	0.115366	0.0001235	0.0003705	1
hsa-miR-15a-5p	CMPK1	0.541	97.0061	3	3	0.114892	0.0001235	0.0003705	1
hsa-miR-194-5p	APPBP2	1	0.000189126	3	3	0.115964	0.0001235	0.0003705	1
hsa-miR-29b-3p	CMPK1	0.566	95.4729	3	3	0.11236	0.0001235	0.0003705	1
hsa-miR-320a	CMPK1	0.979	51.6176	3	3	0.105525	0.0001235	0.0003705	1
hsa-miR-484	CMPK1	1	0.000189126	3	3	0.10646	0.0001235	0.0003705	1
hsa-miR-497-5p	CMPK1	0.536	97.3269	3	3	0.110629	0.0001235	0.0003705	1
hsa-miR-676-5p	APPBP2	0.97	54.8638	3	3	0.109449	0.0001235	0.0003705	1
hsa-miR-92a-3p	EIF4A2	0.949	59.6114	32	32	0.14938	1.169e-05	0.0003741	1
hsa-miR-423-3p	PPP1CC	0.981	50.9165	35	35	0.097499	1.09e-05	0.0003815	1
hsa-miR-301a-3p	BTG1	0.793	78.6267	30	30	0.121021	1.285e-05	0.0003855	1
hsa-miR-581	SMAD7	1	0.000189126	23	23	0.055174	1.688e-05	0.0003882	1
hsa-miR-154-3p	SCAF8	1	0.000189126	6	6	0.129431	6.622e-05	0.0003973	1
hsa-miR-22-5p	SCAF8	0.627	90.9435	6	6	0.115845	6.622e-05	0.0003973	1
hsa-miR-873-5p	PANK2	1	0.000189126	6	6	0.135974	6.622e-05	0.0003973	1
hsa-miR-19a-5p	DICER1	0.908	66.6779	10	10	0.078994	3.993e-05	0.0003993	1
hsa-miR-181a-5p	SEC24B	0.973	53.614	2	2	0.093463	0.0002006	0.0004012	1
hsa-miR-376b	FOXJ3	0.868	71.8229	7	7	0.067898	5.769e-05	0.0004038	1
hsa-miR-3662	NONO	1	0.000189126	24	24	0.102999	1.683e-05	0.0004039	1
hsa-miR-520a-3p	FOXJ3	0.996	40.3642	7	7	0.100707	5.843e-05	0.000409	1
hsa-miR-199a-5p	BTG3	0.997	38.6214	3	3	0.088528	0.0001369	0.0004107	1
hsa-miR-152	MAP3K4	1	0.000189126	7	7	0.109141	5.873e-05	0.0004111	1
hsa-miR-493-5p	MAP3K4	0.519	98.8327	7	7	0.108342	5.873e-05	0.0004111	1
hsa-miR-181a-5p	CALR	1	0.000189126	14	14	0.065738	2.942e-05	0.0004119	1
hsa-miR-424-5p	VAMP7	1	0.000189126	43	43	0.074021	9.586e-06	0.0004122	1
hsa-miR-607	FOXJ3	0.991	45.6945	7	7	0.05584	5.899e-05	0.0004129	1
hsa-miR-22-3p	CSNK2A2	0.579	94.6865	5	5	0.104417	8.504e-05	0.0004252	1
hsa-miR-580	PTK2	0.992	44.957	32	32	0.087417	1.334e-05	0.0004269	1
hsa-miR-579	SCAF8	1	0.000189126	6	6	0.087983	7.147e-05	0.0004288	1
hsa-miR-520g	CMPK1	1	0.000189126	3	3	0.038735	0.0001439	0.0004317	1
hsa-miR-301a-3p	ESR1	0.984	49.3046	43	43	0.15884	1.005e-05	0.0004322	1
hsa-miR-15b-5p	VAMP7	1	0.000189126	43	43	0.116048	1.016e-05	0.0004369	1
hsa-miR-3688-3p	MACF1	0.995	41.8528	15	15	0.059229	2.945e-05	0.0004418	1
hsa-miR-15a-5p	DICER1	0.995	41.8528	10	10	0.081718	4.448e-05	0.0004448	1
hsa-miR-9-5p	DICER1	0.999	30.3054	10	10	0.190953	4.448e-05	0.0004448	1
hsa-miR-1179	FOXJ3	1	0.000189126	7	7	0.083233	6.405e-05	0.0004483	1
hsa-miR-579	NOTCH2	1	0.000189126	35	35	0.065079	1.292e-05	0.0004522	1
hsa-miR-17-5p	NONO	1	0.000189126	24	24	0.192223	1.921e-05	0.000461	1
hsa-miR-600	KCNMA1	0.718	84.3956	9	9	0.042471	5.174e-05	0.0004657	1
hsa-miR-379-3p	CSNK2A2	0.998	35.422	5	5	0.059598	9.384e-05	0.0004692	1
hsa-miR-922	MBNL1	0.837	74.6204	4	4	0.014167	0.0001189	0.0004756	1
hsa-miR-1294	APPBP2	0.567	95.4146	3	3	0.103058	0.0001586	0.0004758	1
hsa-miR-218-2-3p	APPBP2	0.758	81.7461	3	3	0.072511	0.0001586	0.0004758	1
hsa-miR-320b	CMPK1	0.865	72.1058	3	3	0.107283	0.0001586	0.0004758	1
hsa-miR-3609	BTG3	1	0.000189126	3	3	0.12817	0.0001586	0.0004758	1
hsa-miR-3680-5p	APPBP2	0.919	64.7361	3	3	0.088001	0.0001586	0.0004758	1
hsa-miR-3927	APPBP2	0.593	93.8313	3	3	0.081459	0.0001586	0.0004758	1
hsa-let-7c	SCAF8	0.815	76.9535	6	6	0.06986	8.037e-05	0.0004822	1
hsa-miR-150-5p	STK39	1	0.000189126	32	32	0.082886	1.529e-05	0.0004893	1
hsa-miR-377-5p	SRF	0.844	74.0067	7	7	0.073371	7.005e-05	0.0004903	1
hsa-miR-520d-3p	FOXJ3	1	0.000189126	7	7	0.040929	7.103e-05	0.0004972	1
hsa-miR-3942-5p	EPAS1	0.999	30.3054	37	37	0.079291	1.348e-05	0.0004988	1
hsa-miR-144-3p	PPP1CC	1	0.000189126	35	35	0.103814	1.431e-05	0.0005009	1
hsa-miR-130a-3p	MBNL1	1	0.000189126	4	4	0.118476	0.0001255	0.000502	1
hsa-miR-183-5p	FOXJ3	0.995	41.8528	7	7	0.078419	7.23e-05	0.0005061	1
hsa-miR-34c-3p	FOXJ3	0.959	57.5439	7	7	0.097824	7.377e-05	0.0005164	1
hsa-miR-577	EGFR	0.525	98.4497	7	7	0.218358	7.475e-05	0.0005233	1
hsa-miR-223-5p	PPP1CC	0.869	71.7164	35	35	0.075108	1.506e-05	0.0005271	1
hsa-let-7f-1-3p	SOX4	0.986	48.4564	4	4	0.114951	0.0001321	0.0005284	1
hsa-let-7i-5p	SOX4	0.608	92.8824	4	4	0.125909	0.0001321	0.0005284	1
hsa-miR-1276	SOX4	1	0.000189126	4	4	0.139642	0.0001321	0.0005284	1
hsa-miR-1278	MBNL1	0.696	85.8846	4	4	0.086299	0.0001321	0.0005284	1
hsa-miR-130b-5p	MBNL1	0.996	40.3642	4	4	0.185696	0.0001321	0.0005284	1
hsa-miR-137	SOX4	1	0.000189126	4	4	0.180635	0.0001321	0.0005284	1
hsa-miR-140-5p	SOX4	1	0.000189126	4	4	0.16106	0.0001321	0.0005284	1
hsa-miR-19a-3p	MBNL1	1	0.000189126	4	4	0.20804	0.0001321	0.0005284	1
hsa-miR-20b-5p	SOX4	1	0.000189126	4	4	0.148542	0.0001321	0.0005284	1
hsa-miR-3065-5p	SOX4	0.995	41.8528	4	4	0.144566	0.0001321	0.0005284	1
hsa-miR-363-3p	SOX4	1	0.000189126	4	4	0.115791	0.0001321	0.0005284	1
hsa-miR-603	SOX4	1	0.000189126	4	4	0.066613	0.0001321	0.0005284	1
hsa-miR-342-3p	PRKCD	0.753	82.0854	5	5	0.1045	0.0001079	0.0005395	1
hsa-miR-3662	RAF1	0.999	30.3054	47	47	0.104984	1.164e-05	0.0005471	1
hsa-miR-3646	NF1	0.571	95.1673	21	21	0.040816	2.61e-05	0.0005481	1
hsa-miR-155-5p	IKBKE	1	0.000189126	6	6	0.10944	9.159e-05	0.0005495	1
hsa-miR-30e-3p	CSNK1A1	0.995	41.8528	33	33	0.062274	1.686e-05	0.0005564	1
hsa-miR-22-3p	STK39	0.953	58.8222	32	32	0.058826	1.739e-05	0.0005565	1
hsa-miR-409-3p	NSA2	0.858	72.7596	4	4	0.083601	0.0001442	0.0005768	1
hsa-miR-34a-3p	CSNK1D	1	0.000189126	71	70	0.07427	8.303e-06	0.0005812	1
hsa-miR-493-5p	STK39	0.997	38.6214	32	32	0.069593	1.826e-05	0.0005843	1
hsa-miR-3199	APPBP2	0.921	64.4653	3	3	0.112594	0.0001982	0.0005946	1
hsa-miR-374b-5p	EIF4A2	0.982	50.4983	32	32	0.062596	1.874e-05	0.0005997	1
hsa-let-7a-3p	FOXJ3	0.966	55.8939	7	7	0.09215	8.701e-05	0.0006091	1
hsa-miR-548b-5p	SUZ12	0.637	90.3514	52	52	0.095635	1.182e-05	0.0006146	1
hsa-miR-7-1-3p	SEC24B	1	0.000189126	2	2	0.108611	0.0003097	0.0006194	1
hsa-miR-125b-5p	MEGF9	0.998	35.422	11	11	0.077637	5.658e-05	0.0006224	1
hsa-miR-199b-5p	BTG3	0.982	50.4983	3	3	0.084521	0.0002083	0.0006249	1
hsa-miR-132-3p	STK39	1	0.000189126	32	32	0.061295	1.956e-05	0.0006259	1
hsa-miR-1255a	MBNL1	1	0.000189126	4	4	0.069787	0.0001582	0.0006328	1
hsa-miR-3929	IKBKE	0.877	70.3655	6	6	0.067956	0.0001064	0.0006384	1
hsa-miR-25-3p	CLK3	1	0.000189126	27	27	0.097661	2.368e-05	0.0006394	1
hsa-miR-559	STAT3	0.623	91.2019	11	11	0.055954	5.833e-05	0.0006416	1
hsa-miR-335-3p	NONO	1	0.000189126	24	24	0.096258	2.695e-05	0.0006468	1
hsa-miR-181a-2-3p	HDAC2	0.536	97.3269	7	7	0.170535	9.265e-05	0.0006486	1
hsa-miR-629-5p	PTK2	1	0.000189126	32	32	0.085071	2.037e-05	0.0006518	1
hsa-miR-3190-5p	MBNL1	0.755	81.9527	4	4	0.058038	0.0001631	0.0006524	1
hsa-miR-410	SRF	0.97	54.8638	7	7	0.087616	9.399e-05	0.0006579	1
hsa-miR-616-5p	SMAD7	0.998	35.422	23	23	0.101082	2.891e-05	0.0006649	1
hsa-miR-130b-3p	DICER1	0.993	43.8171	10	10	0.129031	6.692e-05	0.0006692	1
hsa-miR-301b	DICER1	0.998	35.422	10	10	0.127332	6.692e-05	0.0006692	1
hsa-miR-2114-3p	YAP1	0.996	40.3642	17	17	0.073996	3.942e-05	0.0006701	1
hsa-miR-1257	EPS8	0.532	97.9896	34	34	0.068196	1.976e-05	0.0006718	1
hsa-miR-106a-5p	EPAS1	0.992	44.957	37	37	0.118213	1.817e-05	0.0006723	1
hsa-miR-3653	SCAF8	0.984	49.3046	6	6	0.101099	0.0001129	0.0006774	1
hsa-miR-138-5p	PTK2	1	0.000189126	32	32	0.128963	2.14e-05	0.0006848	1
hsa-miR-454-3p	ESR1	0.986	48.4564	43	43	0.15354	1.602e-05	0.0006889	1
hsa-miR-765	PTK2	0.769	80.3821	32	32	0.066062	2.181e-05	0.0006979	1
hsa-miR-9-3p	KLF5	0.997	38.6214	33	33	0.142087	2.144e-05	0.0007075	1
hsa-miR-132-3p	FOXJ3	0.995	41.8528	7	7	0.068517	0.0001021	0.0007147	1
hsa-miR-106a-5p	NONO	1	0.000189126	24	24	0.157064	2.984e-05	0.0007162	1
hsa-miR-155-3p	APPBP2	1	0.000189126	3	3	0.16465	0.0002421	0.0007263	1
hsa-miR-3149	APPBP2	0.726	83.8537	3	3	0.078369	0.0002421	0.0007263	1
hsa-miR-450b-5p	APPBP2	0.87	71.6277	3	3	0.113861	0.0002421	0.0007263	1
hsa-miR-488-3p	APPBP2	0.708	85.0634	3	3	0.134811	0.0002421	0.0007263	1
hsa-miR-494	APPBP2	1	0.000189126	3	3	0.110669	0.0002421	0.0007263	1
hsa-miR-548j	APPBP2	0.631	90.7041	3	3	0.096557	0.0002421	0.0007263	1
hsa-miR-877-5p	SUZ12	1	0.000189126	52	52	0.129856	1.41e-05	0.0007332	1
hsa-miR-17-5p	SOX4	1	0.000189126	4	4	0.236575	0.0001848	0.0007392	1
hsa-miR-219-2-3p	SOX4	0.978	52.0323	4	4	0.065454	0.0001848	0.0007392	1
hsa-miR-3200-5p	SOX4	1	0.000189126	4	4	0.077115	0.0001848	0.0007392	1
hsa-miR-374c-5p	SOX4	1	0.000189126	4	4	0.124848	0.0001848	0.0007392	1
hsa-miR-489	SOX4	0.999	30.3054	4	4	0.120861	0.0001848	0.0007392	1
hsa-miR-548b-5p	MBNL1	1	0.000189126	4	4	0.127789	0.0001848	0.0007392	1
hsa-miR-548e	SOX4	0.85	73.4806	4	4	0.106661	0.0001848	0.0007392	1
hsa-miR-3192	NPC1	0.881	69.8342	32	32	0.065305	2.326e-05	0.0007443	1
hsa-miR-1179	SEC24B	0.666	88.5768	2	2	0.101988	0.0003731	0.0007462	1
hsa-miR-136-3p	SEC24B	0.89	68.8581	2	2	0.111919	0.0003731	0.0007462	1
hsa-miR-25-3p	PTK2	1	0.000189126	32	32	0.128029	2.332e-05	0.0007462	1
hsa-miR-653	SEC24B	1	0.000189126	2	2	0.111974	0.0003731	0.0007462	1
hsa-miR-3619-5p	FBP1	0.942	61.2867	19	19	0.124184	3.959e-05	0.0007522	1
hsa-miR-3187-3p	DDB2	0.614	92.4533	3	3	0.097565	0.0002569	0.0007707	1
hsa-miR-377-5p	CSNK2A2	0.983	50.1019	5	5	0.06542	0.0001542	0.000771	1
hsa-miR-4306	GAA	0.965	56.1655	18	18	0.078251	4.324e-05	0.0007783	1
hsa-miR-3942-5p	SUZ12	0.998	35.422	52	52	0.079605	1.526e-05	0.0007935	1
hsa-miR-548a-3p	STK39	1	0.000189126	32	32	0.027425	2.499e-05	0.0007997	1
hsa-miR-335-3p	SUZ12	0.996	40.3642	52	52	0.09862	1.547e-05	0.0008044	1
hsa-miR-3942-5p	KLF5	0.518	98.8944	33	33	0.07037	2.459e-05	0.0008115	1
hsa-miR-1271-5p	SEC24B	1	0.000189126	2	2	0.105573	0.0004071	0.0008142	1
hsa-miR-222-5p	CSNK2A2	1	0.000189126	5	5	0.106916	0.0001645	0.0008225	1
hsa-miR-98	IKBKE	1	0.000189126	6	6	0.107182	0.0001378	0.0008268	1
hsa-let-7a-2-3p	PPP1CC	0.995	41.8528	35	35	0.095486	2.37e-05	0.0008295	1
hsa-miR-106a-5p	TJP1	0.998	35.422	1	1	0.225864	0.0008584	0.0008584	1
hsa-miR-1270	TJP1	1	0.000189126	1	1	0.170197	0.0008584	0.0008584	1
hsa-miR-15b-5p	TJP1	0.962	56.8946	1	1	0.175101	0.0008584	0.0008584	1
hsa-miR-17-5p	TJP1	0.998	35.422	1	1	0.267551	0.0008584	0.0008584	1
hsa-miR-186-5p	PLXNA2	0.571	95.1673	1	1	0.202472	0.0008584	0.0008584	1
hsa-miR-186-5p	SNX2	1	0.000189126	1	1	0.202472	0.0008584	0.0008584	1
hsa-miR-18a-5p	PLXNA2	0.546	96.7032	1	1	0.304487	0.0008584	0.0008584	1
hsa-miR-18a-5p	TJP1	1	0.000189126	1	1	0.304487	0.0008584	0.0008584	1
hsa-miR-19b-1-5p	SNX2	0.777	79.7981	1	1	0.231425	0.0008584	0.0008584	1
hsa-miR-20a-5p	TJP1	0.998	35.422	1	1	0.24759	0.0008584	0.0008584	1
hsa-miR-3132	TJP1	0.757	81.8129	1	1	0.083549	0.0008584	0.0008584	1
hsa-miR-3200-3p	TJP1	0.999	30.3054	1	1	0.201004	0.0008584	0.0008584	1
hsa-miR-324-5p	TJP1	0.999	30.3054	1	1	0.16655	0.0008584	0.0008584	1
hsa-miR-378b	SNX2	0.928	63.4992	1	1	0.161763	0.0008584	0.0008584	1
hsa-miR-455-5p	TJP1	0.997	38.6214	1	1	0.220472	0.0008584	0.0008584	1
hsa-miR-500b	TJP1	1	0.000189126	1	1	0.187033	0.0008584	0.0008584	1
hsa-miR-501-5p	TJP1	1	0.000189126	1	1	0.194452	0.0008584	0.0008584	1
hsa-miR-505-5p	TJP1	1	0.000189126	1	1	0.222574	0.0008584	0.0008584	1
hsa-miR-516a-5p	SNX2	0.776	79.8708	1	1	0.269517	0.0008584	0.0008584	1
hsa-miR-545-3p	SNX2	0.959	57.5439	1	1	0.111233	0.0008584	0.0008584	1
hsa-miR-548l	SNX2	1	0.000189126	1	1	0.114769	0.0008584	0.0008584	1
hsa-miR-570-3p	PLXNA2	1	0.000189126	1	1	0.177223	0.0008584	0.0008584	1
hsa-miR-590-3p	PLXNA2	0.999	30.3054	1	1	0.187531	0.0008584	0.0008584	1
hsa-miR-93-3p	TJP1	0.988	47.4918	1	1	0.207151	0.0008584	0.0008584	1
hsa-miR-98	TJP1	0.993	43.8171	1	1	0.157557	0.0008584	0.0008584	1
hsa-miR-199b-3p	FOXJ3	0.614	92.4533	7	7	0.067028	0.0001232	0.0008624	1
hsa-miR-410	BTG3	1	0.000189126	3	3	0.092495	0.0002894	0.0008682	1
hsa-miR-23c	APPBP2	0.999	30.3054	3	3	0.094582	0.0002903	0.0008709	1
hsa-miR-424-3p	APPBP2	0.999	30.3054	3	3	0.106111	0.0002903	0.0008709	1
hsa-miR-592	APPBP2	0.941	61.4501	3	3	0.108161	0.0002903	0.0008709	1
hsa-miR-29a-3p	ATP1B1	0.998	35.422	20	20	0.064363	4.367e-05	0.0008734	1
hsa-miR-1238	INSIG1	0.959	57.5439	2	2	0.065008	0.0004425	0.000885	1
hsa-miR-421	SEC24B	1	0.000189126	2	2	0.122615	0.0004425	0.000885	1
hsa-miR-199a-3p	FOXJ3	0.993	43.8171	7	7	0.066992	0.0001278	0.0008946	1
hsa-miR-33a-3p	NSA2	1	0.000189126	4	4	0.098252	0.0002246	0.0008984	1
hsa-miR-576-5p	BTG1	1	0.000189126	30	30	0.137129	3.005e-05	0.0009015	1
hsa-miR-183-5p	UBE3C	0.992	44.957	20	20	0.0721	4.518e-05	0.0009036	1
hsa-let-7f-1-3p	FOXJ3	0.801	78.0237	7	7	0.068965	0.0001296	0.0009072	1
hsa-miR-1236	CLK4	0.718	84.3956	29	29	0.077165	3.133e-05	0.0009086	1
hsa-miR-1285-3p	PIK3R1	0.885	69.392	39	39	0.066708	2.343e-05	0.0009138	1
hsa-miR-621	PDPK1	0.832	75.08	6	6	0.006446	0.0001547	0.0009282	1
hsa-miR-3116	CALR	0.685	87.4091	14	14	0.060954	6.651e-05	0.0009311	1
hsa-miR-421	NOTCH2	0.758	81.7461	35	35	0.115342	2.688e-05	0.0009408	1
hsa-miR-376a-3p	HDAC1	0.559	95.9001	7	7	0.064523	0.0001358	0.0009506	1
hsa-miR-500a-3p	EP300	1	0.000189126	20	20	0.103744	4.785e-05	0.000957	1
hsa-miR-548d-3p	NOTCH2	0.899	67.7898	35	35	0.139983	2.754e-05	0.0009639	1
hsa-miR-668	PPP1CC	1	0.000189126	35	35	0.054453	2.757e-05	0.0009649	1
hsa-miR-7-1-3p	CSNK1A1	0.999	30.3054	33	33	0.07731	2.943e-05	0.0009712	1
hsa-miR-423-3p	IGFBP2	0.985	48.8707	38	38	0.095628	2.558e-05	0.000972	1
hsa-miR-629-3p	DICER1	0.804	77.7907	10	10	0.082057	9.735e-05	0.0009735	1
hsa-miR-15b-3p	MBNL1	0.97	54.8638	4	4	0.196415	0.0002461	0.0009844	1
hsa-miR-16-2-3p	MBNL1	0.999	30.3054	4	4	0.161789	0.0002461	0.0009844	1
hsa-miR-2355-3p	MBNL1	0.963	56.6374	4	4	0.135817	0.0002461	0.0009844	1
hsa-miR-320a	SOX4	0.879	70.0445	4	4	0.105525	0.0002461	0.0009844	1
hsa-miR-362-5p	MBNL1	1	0.000189126	4	4	0.140997	0.0002461	0.0009844	1
hsa-miR-519d	SOX4	0.876	71.0221	4	4	0.045756	0.0002461	0.0009844	1
hsa-miR-3128	PPP1CC	0.925	63.8991	35	35	0.051998	2.826e-05	0.0009891	1
hsa-miR-26a-5p	FOXJ3	0.983	50.1019	7	7	0.072265	0.0001423	0.0009961	1
hsa-miR-20b-5p	SMAD1	1	0.000189126	17	17	0.111085	5.863e-05	0.0009967	1
hsa-miR-15a-5p	USP12	0.967	55.6329	12	12	0.065272	8.312e-05	0.0009974	1
hsa-miR-126-5p	PRKCE	0.945	60.3862	13	13	0.056621	7.673e-05	0.0009975	1
hsa-miR-616-3p	DCUN1D4	1	0.000189126	19	19	0.069158	5.254e-05	0.0009983	1
hsa-miR-548d-3p	USP7	1	0.000189126	56	54	0.105954	1.849e-05	0.0009985	1
hsa-miR-19a-3p	NOTCH2	0.655	89.2349	35	35	0.166527	2.869e-05	0.001004	1
hsa-miR-541-5p	CHD8	0.915	65.3245	12	12	0.04584	8.459e-05	0.001015	1
hsa-miR-3129-5p	MAP3K4	0.998	35.422	7	7	0.092226	0.0001452	0.001016	1
hsa-miR-15b-3p	NCOR2	0.999	30.3054	31	31	0.161813	3.285e-05	0.001018	1
hsa-miR-2116-3p	MBNL1	0.999	30.3054	4	4	0.092141	0.0002556	0.001022	1
hsa-miR-570-3p	DICER1	0.847	73.7459	10	10	0.117618	0.0001023	0.001023	1
hsa-miR-191-5p	APPBP2	0.624	91.1302	3	3	0.107953	0.0003429	0.001029	1
hsa-miR-195-5p	CMPK1	0.541	97.0061	3	3	0.107723	0.0003429	0.001029	1
hsa-miR-495	APPBP2	1	0.000189126	3	3	0.116828	0.0003429	0.001029	1
hsa-miR-548k	BTG3	1	0.000189126	3	3	0.10836	0.0003429	0.001029	1
hsa-miR-548v	BTG3	0.999	30.3054	3	3	0.117472	0.0003429	0.001029	1
hsa-miR-519c-3p	FOXJ3	0.997	38.6214	7	7	0.062442	0.0001489	0.001042	1
hsa-miR-641	FOXJ3	0.925	63.8991	7	7	0.063626	0.0001516	0.001061	1
hsa-miR-3614-5p	EIF4A2	0.999	30.3054	32	32	0.07754	3.35e-05	0.001072	1
hsa-miR-92a-3p	CLK3	0.996	40.3642	27	27	0.125288	3.969e-05	0.001072	1
hsa-miR-135b-3p	MBNL1	0.953	58.8222	4	4	0.228371	0.000272	0.001088	1
hsa-miR-424-5p	AK2	0.98	51.2666	43	43	0.083005	2.533e-05	0.001089	1
hsa-miR-20a-3p	NONO	1	0.000189126	24	24	0.145237	4.596e-05	0.001103	1
hsa-miR-505-3p	EP300	1	0.000189126	20	20	0.129544	5.532e-05	0.001106	1
hsa-miR-605	CSNK1A1	0.985	48.8707	33	33	0.059568	3.402e-05	0.001123	1
hsa-miR-337-3p	ESR1	0.86	72.5746	43	43	0.06185	2.628e-05	0.00113	1
hsa-miR-511	FOXJ3	1	0.000189126	7	7	0.076853	0.0001628	0.00114	1
hsa-miR-452-3p	NOTCH2	0.974	53.3216	35	35	0.158342	3.289e-05	0.001151	1
hsa-miR-588	EIF4A2	0.736	83.2039	32	32	0.053033	3.614e-05	0.001156	1
hsa-miR-548k	ACAT2	0.831	75.2145	14	14	0.068125	8.293e-05	0.001161	1
hsa-miR-2355-3p	SUZ12	1	0.000189126	52	52	0.124089	2.236e-05	0.001163	1
hsa-miR-16-5p	MAP3K4	1	0.000189126	7	7	0.07989	0.0001667	0.001167	1
hsa-miR-219-5p	FOXJ3	0.998	35.422	7	7	0.080771	0.0001678	0.001175	1
hsa-miR-3171	PTEN	0.995	41.8528	7	7	0.033562	0.000169	0.001183	1
hsa-miR-580	PHB2	1	0.000189126	53	53	0.088725	2.252e-05	0.001194	1
hsa-miR-106a-5p	SMAD7	0.948	59.7998	23	23	0.120344	5.198e-05	0.001196	1
hsa-miR-223-3p	CMPK1	1	0.000189126	3	3	0.184596	0.0003999	0.0012	1
hsa-miR-323a-3p	APPBP2	0.937	62.0904	3	3	0.107565	0.0003999	0.0012	1
hsa-miR-19a-3p	EIF4A2	1	0.000189126	32	32	0.08941	3.775e-05	0.001208	1
hsa-miR-1265	ITSN1	1	0.000189126	17	17	0.048105	7.118e-05	0.00121	1
hsa-miR-15b-5p	NCOR2	0.681	87.6495	31	31	0.116181	3.911e-05	0.001212	1
hsa-miR-3613-3p	SCAF8	0.974	53.3216	6	6	0.067109	0.0002048	0.001229	1
hsa-miR-3610	PPP1CC	0.579	94.6865	35	35	0.071968	3.53e-05	0.001235	1
hsa-miR-148b-5p	PPP1CC	1	0.000189126	35	35	0.096501	3.604e-05	0.001261	1
hsa-miR-425-5p	PPP1CC	1	0.000189126	35	35	0.087545	3.604e-05	0.001261	1
hsa-miR-132-3p	SOX4	0.985	48.8707	4	4	0.111901	0.000316	0.001264	1
hsa-miR-3187-3p	MBNL1	0.763	81.4199	4	4	0.128386	0.000316	0.001264	1
hsa-miR-320b	SOX4	0.999	30.3054	4	4	0.107283	0.000316	0.001264	1
hsa-miR-34a-5p	SOX4	0.969	55.1026	4	4	0.098947	0.000316	0.001264	1
hsa-miR-3653	SOX4	1	0.000189126	4	4	0.121116	0.000316	0.001264	1
hsa-miR-376c	SOX4	0.884	69.5123	4	4	0.115862	0.000316	0.001264	1
hsa-miR-487a	SOX4	0.917	65.0227	4	4	0.096202	0.000316	0.001264	1
hsa-miR-576-5p	MBNL1	0.896	68.143	4	4	0.172723	0.000316	0.001264	1
hsa-miR-590-3p	MBNL1	0.979	51.6176	4	4	0.151574	0.000316	0.001264	1
hsa-miR-3929	EIF4A2	0.957	57.9431	32	32	0.066806	3.967e-05	0.001269	1
hsa-miR-205-3p	NBR1	0.871	71.5275	11	10	0.072533	0.0001271	0.001271	1
hsa-miR-20b-5p	EIF4A2	1	0.000189126	32	32	0.119465	3.985e-05	0.001275	1
hsa-miR-1262	DCUN1D4	0.925	63.8991	19	19	0.070326	6.725e-05	0.001278	1
hsa-miR-548a-5p	EPB41L2	1	0.000189126	23	23	0.053818	5.614e-05	0.001291	1
hsa-miR-129-5p	HDAC2	0.761	81.5593	7	7	0.178529	0.0001848	0.001294	1
hsa-miR-548f	EPAS1	0.998	35.422	37	37	0.096802	3.497e-05	0.001294	1
hsa-miR-27a-3p	AK2	0.987	48	43	43	0.078512	3.026e-05	0.001301	1
hsa-miR-210	SUZ12	1	0.000189126	52	52	0.111832	2.504e-05	0.001302	1
hsa-miR-645	VAV3	0.977	52.3486	6	6	0.010538	0.0002179	0.001307	1
hsa-miR-222-5p	AKAP9	1	0.000189126	26	26	0.10798	5.031e-05	0.001308	1
hsa-miR-154-3p	PPP1CC	0.999	30.3054	35	35	0.08513	3.74e-05	0.001309	1
hsa-miR-670	RYBP	0.654	89.2887	13	13	0.029344	0.0001011	0.001314	1
hsa-miR-19b-3p	CEBPZ	1	0.000189126	27	27	0.105899	4.874e-05	0.001316	1
hsa-miR-330-3p	COPB2	0.938	61.9367	6	6	0.117418	0.0002197	0.001318	1
hsa-miR-581	SCAF8	0.941	61.4501	6	6	0.110969	0.0002197	0.001318	1
hsa-miR-7-1-3p	SCAF8	1	0.000189126	6	6	0.130284	0.0002197	0.001318	1
hsa-miR-556-3p	NUAK1	0.999	30.3054	25	25	0.085536	5.276e-05	0.001319	1
hsa-miR-30c-2-3p	CEBPG	0.793	78.6267	46	46	0.071127	2.881e-05	0.001325	1
hsa-miR-144-5p	IRS2	1	0.000189126	36	36	0.093745	3.692e-05	0.001329	1
hsa-miR-493-5p	PPP1CC	1	0.000189126	35	35	0.053437	3.803e-05	0.001331	1
hsa-miR-106b-5p	PTK2	0.962	56.8946	32	32	0.144464	4.208e-05	0.001347	1
hsa-miR-525-5p	FOXJ3	0.991	45.6945	7	7	0.028888	0.0001934	0.001354	1
hsa-miR-520d-5p	JUN	0.987	48	2	2	0.041359	0.0006858	0.001372	1
hsa-miR-18a-5p	DICER1	1	0.000189126	10	10	0.181121	0.0001376	0.001376	1
hsa-miR-15b-5p	ACSL1	1	0.000189126	26	26	0.084449	5.311e-05	0.001381	1
hsa-let-7a-5p	APPBP2	1	0.000189126	3	3	0.102239	0.0004611	0.001383	1
hsa-miR-126-5p	CMPK1	0.955	58.4189	3	3	0.088199	0.0004611	0.001383	1
hsa-miR-1269a	APPBP2	0.975	52.9929	3	3	0.227691	0.0004611	0.001383	1
hsa-miR-33b-5p	APPBP2	0.97	54.8638	3	3	0.10849	0.0004611	0.001383	1
hsa-miR-326	ELK1	0.681	87.6495	14	14	0.075413	9.9e-05	0.001386	1
hsa-miR-10b-3p	SCAF8	1	0.000189126	6	6	0.075575	0.0002319	0.001391	1
hsa-miR-30e-5p	RGS2	1	0.000189126	9	9	0.112231	0.0001561	0.001405	1
hsa-miR-675-3p	STK39	1	0.000189126	32	32	0.064758	4.406e-05	0.00141	1
hsa-miR-187-5p	MBNL1	0.613	92.5829	4	4	0.130343	0.0003531	0.001412	1
hsa-miR-3074-3p	USP12	0.847	73.7459	12	12	0.069115	0.0001179	0.001415	1
hsa-miR-3616-5p	SNX13	0.885	69.392	6	6	0.07298	0.0002374	0.001424	1
hsa-miR-20b-5p	BTG1	0.503	99.8137	30	30	0.108938	4.758e-05	0.001427	1
hsa-miR-3065-5p	FOXJ3	0.926	63.7746	7	7	0.105138	0.0002043	0.00143	1
hsa-miR-181d	CALR	0.619	91.4666	14	14	0.083886	0.000103	0.001442	1
hsa-miR-3198	MBNL1	0.694	86.0338	4	4	0.072535	0.000365	0.00146	1
hsa-miR-2115-3p	SEC24B	0.772	80.1737	2	2	0.121167	0.0007315	0.001463	1
hsa-miR-3677-3p	SEC24B	0.999	30.3054	2	2	0.134808	0.0007315	0.001463	1
hsa-miR-548a-3p	FOXJ3	0.814	77.0316	7	7	0.026026	0.0002093	0.001465	1
hsa-miR-381	ESR1	0.996	40.3642	43	43	0.065159	3.415e-05	0.001468	1
hsa-miR-9-5p	NOTCH2	1	0.000189126	35	35	0.16952	4.231e-05	0.001481	1
hsa-miR-135a-5p	MTOR	0.899	67.7898	9	9	0.119658	0.000165	0.001485	1
hsa-miR-17-5p	SUZ12	1	0.000189126	52	52	0.192223	2.856e-05	0.001485	1
hsa-let-7i-5p	DICER1	1	0.000189126	10	10	0.088048	0.0001494	0.001494	1
hsa-miR-548b-3p	DICER1	1	0.000189126	10	10	0.117191	0.0001494	0.001494	1
hsa-let-7f-2-3p	SPRED2	0.957	57.9431	7	7	0.067775	0.0002135	0.001495	1
hsa-miR-17-5p	EPAS1	0.978	52.0323	37	37	0.161653	4.07e-05	0.001506	1
hsa-miR-299-5p	DNMT1	0.96	57.3267	4	4	0.068809	0.0003805	0.001522	1
hsa-miR-194-5p	CSNK1D	0.982	50.4983	71	70	0.076506	2.197e-05	0.001538	1
hsa-miR-934	MBNL1	1	0.000189126	4	4	0.254424	0.0003858	0.001543	1
hsa-miR-363-5p	PRKCD	1	0.000189126	5	5	0.058894	0.0003091	0.001545	1
hsa-miR-223-5p	STK39	1	0.000189126	32	32	0.07332	4.843e-05	0.00155	1
hsa-miR-377-3p	SCAF8	0.996	40.3642	6	6	0.066028	0.000259	0.001554	1
hsa-miR-519e-3p	CAB39	0.999	30.3054	8	8	0.063327	0.0001948	0.001558	1
hsa-miR-19b-2-5p	MBNL1	0.651	89.4744	4	4	0.056814	0.0003899	0.00156	1
hsa-miR-15b-5p	EIF4A2	0.997	38.6214	32	32	0.122367	4.892e-05	0.001565	1
hsa-miR-30c-2-3p	SOX4	0.534	97.8483	4	4	0.105525	0.0003946	0.001578	1
hsa-miR-3199	SOX4	0.59	94.0168	4	4	0.112594	0.0003946	0.001578	1
hsa-miR-377-3p	SOX4	0.989	46.9549	4	4	0.111539	0.0003946	0.001578	1
hsa-miR-570-3p	MBNL1	1	0.000189126	4	4	0.137824	0.0003946	0.001578	1
hsa-miR-181d	ATP1B1	0.865	72.1058	20	20	0.093828	7.899e-05	0.00158	1
hsa-miR-20b-5p	BTG3	1	0.000189126	3	3	0.132911	0.0005267	0.00158	1
hsa-miR-219-1-3p	BTG3	1	0.000189126	3	3	0.109353	0.0005267	0.00158	1
hsa-miR-548s	SNX17	1	0.000189126	39	39	0.115624	4.051e-05	0.00158	1
hsa-miR-664-3p	APPBP2	0.861	72.4825	3	3	0.106674	0.0005267	0.00158	1
hsa-miR-365a-3p	CSK	0.997	38.6214	7	7	0.082873	0.0002263	0.001584	1
hsa-miR-3662	KLF5	0.997	38.6214	33	33	0.119057	4.8e-05	0.001584	1
hsa-miR-3149	SCAF8	1	0.000189126	6	6	0.073787	0.0002643	0.001586	1
hsa-miR-18a-5p	NOTCH2	0.972	53.8807	35	35	0.254543	4.55e-05	0.001592	1
hsa-miR-3907	PPP1CC	0.708	85.0634	35	35	0.037278	4.563e-05	0.001597	1
hsa-let-7c	CDCA8	0.992	44.957	13	13	0.06518	0.0001237	0.001608	1
hsa-miR-21-3p	PTK2	0.915	65.3245	32	32	0.082516	5.028e-05	0.001609	1
hsa-miR-15b-3p	KLF5	0.952	59.0083	33	33	0.104423	4.886e-05	0.001612	1
hsa-miR-193a-5p	ELK1	0.94	61.6104	14	14	0.077895	0.0001155	0.001617	1
hsa-miR-141-5p	EPS8	0.504	99.746	34	34	0.062747	4.763e-05	0.001619	1
hsa-miR-3662	DICER1	0.526	98.3871	10	10	0.104984	0.0001621	0.001621	1
hsa-miR-628-5p	PPP1CC	0.886	69.2789	35	35	0.076223	4.683e-05	0.001639	1
hsa-miR-3202	PIM1	0.631	90.7041	22	22	0.069561	7.46e-05	0.001641	1
hsa-miR-381	AKAP9	0.998	35.422	26	26	0.068966	6.339e-05	0.001648	1
hsa-miR-195-5p	ACSL1	1	0.000189126	26	26	0.066343	6.369e-05	0.001656	1
hsa-miR-20a-5p	BTG1	0.837	74.6204	30	30	0.140782	5.551e-05	0.001665	1
hsa-miR-217	SCAF8	1	0.000189126	6	6	0.098317	0.000279	0.001674	1
hsa-miR-106b-5p	EIF4A2	0.997	38.6214	32	32	0.16795	5.266e-05	0.001685	1
hsa-miR-449b-3p	C2CD2L	0.977	52.3486	16	16	0.118344	0.0001053	0.001685	1
hsa-miR-3127-5p	SUZ12	0.547	96.6409	52	52	0.093471	3.248e-05	0.001689	1
hsa-miR-20b-5p	SMAD7	0.903	67.2952	23	23	0.120727	7.372e-05	0.001696	1
hsa-miR-135a-5p	MST1	0.685	87.4091	3	3	0.141359	0.0005714	0.001714	1
hsa-miR-544b	ESRRA	0.898	67.9157	14	14	0.052965	0.0001225	0.001715	1
hsa-let-7d-5p	TJP1	0.977	52.3486	1	1	0.166996	0.001717	0.001717	1
hsa-miR-128	SNX2	0.586	94.2564	1	1	0.144109	0.001717	0.001717	1
hsa-miR-141-3p	TJP1	0.941	61.4501	1	1	0.167516	0.001717	0.001717	1
hsa-miR-1537	PLXNA2	0.565	95.534	1	1	0.091629	0.001717	0.001717	1
hsa-miR-15a-3p	TJP1	0.988	47.4918	1	1	0.125689	0.001717	0.001717	1
hsa-miR-183-3p	PLXNA2	1	0.000189126	1	1	0.135427	0.001717	0.001717	1
hsa-miR-18b-5p	PLXNA2	0.999	30.3054	1	1	0.231875	0.001717	0.001717	1
hsa-miR-18b-5p	TJP1	1	0.000189126	1	1	0.231875	0.001717	0.001717	1
hsa-miR-200c-5p	TJP1	0.77	80.312	1	1	0.159078	0.001717	0.001717	1
hsa-miR-23a-3p	TJP1	0.995	41.8528	1	1	0.158316	0.001717	0.001717	1
hsa-miR-31-5p	PLXNA2	1	0.000189126	1	1	0.223384	0.001717	0.001717	1
hsa-miR-3188	TJP1	0.749	82.3491	1	1	0.141496	0.001717	0.001717	1
hsa-miR-32-5p	SNX2	1	0.000189126	1	1	0.144067	0.001717	0.001717	1
hsa-miR-3611	SNX2	0.759	81.6835	1	1	0.089011	0.001717	0.001717	1
hsa-miR-362-5p	TJP1	1	0.000189126	1	1	0.163004	0.001717	0.001717	1
hsa-miR-3664-5p	TJP1	0.749	82.3491	1	1	0.153639	0.001717	0.001717	1
hsa-miR-3667-3p	TJP1	0.632	90.6473	1	1	0.090698	0.001717	0.001717	1
hsa-miR-378a-3p	SNX2	0.996	40.3642	1	1	0.166284	0.001717	0.001717	1
hsa-miR-421	TJP1	0.89	68.8581	1	1	0.167205	0.001717	0.001717	1
hsa-miR-429	TJP1	1	0.000189126	1	1	0.157092	0.001717	0.001717	1
hsa-miR-455-3p	SNX2	1	0.000189126	1	1	0.224379	0.001717	0.001717	1
hsa-miR-517a-3p	TJP1	0.999	30.3054	1	1	0.159458	0.001717	0.001717	1
hsa-miR-517b-3p	TJP1	1	0.000189126	1	1	0.159458	0.001717	0.001717	1
hsa-miR-517c-3p	TJP1	1	0.000189126	1	1	0.050034	0.001717	0.001717	1
hsa-miR-519a-5p	TJP1	0.707	85.1356	1	1	0.277496	0.001717	0.001717	1
hsa-miR-556-3p	SNX2	0.993	43.8171	1	1	0.127573	0.001717	0.001717	1
hsa-miR-582-5p	PLXNA2	0.983	50.1019	1	1	0.184973	0.001717	0.001717	1
hsa-miR-582-5p	TJP1	0.995	41.8528	1	1	0.184973	0.001717	0.001717	1
hsa-miR-597	TJP1	1	0.000189126	1	1	0.104135	0.001717	0.001717	1
hsa-miR-651	PLXNA2	0.542	96.9466	1	1	0.144453	0.001717	0.001717	1
hsa-miR-9-5p	PLXNA2	0.915	65.3245	1	1	0.278283	0.001717	0.001717	1
hsa-miR-92a-3p	SNX2	1	0.000189126	1	1	0.204537	0.001717	0.001717	1
hsa-miR-548f	PTK2	1	0.000189126	32	32	0.138845	5.383e-05	0.001723	1
hsa-miR-520c-3p	SUZ12	0.722	84.1251	52	52	0.027547	3.325e-05	0.001729	1
hsa-miR-3920	KLF5	0.672	88.2169	33	33	0.092514	5.242e-05	0.00173	1
hsa-miR-380-3p	DCUN1D4	0.894	68.3906	19	19	0.07299	9.127e-05	0.001734	1
hsa-miR-340-5p	SUZ12	0.985	48.8707	52	52	0.076088	3.349e-05	0.001741	1
hsa-miR-22-3p	SRF	0.801	78.0237	7	7	0.072515	0.0002507	0.001755	1
hsa-miR-592	CSNK1A1	0.951	59.2129	33	33	0.073289	5.326e-05	0.001758	1
hsa-miR-642a-5p	FOXJ3	1	0.000189126	7	7	0.071153	0.0002522	0.001765	1
hsa-miR-889	NR3C1	1	0.000189126	9	9	0.0603	0.0001974	0.001777	1
hsa-miR-29a-3p	MEST	1	0.000189126	10	10	0.073859	0.0001787	0.001787	1
hsa-miR-133a	CMPK1	0.677	87.8912	3	3	0.114293	0.0005966	0.00179	1
hsa-miR-548j	BTG3	1	0.000189126	3	3	0.085379	0.0005966	0.00179	1
hsa-miR-7-5p	APPBP2	0.998	35.422	3	3	0.154745	0.0005966	0.00179	1
hsa-miR-411-3p	CSNK2A2	1	0.000189126	5	5	0.086327	0.0003582	0.001791	1
hsa-miR-548k	BAG6	0.988	47.4918	37	37	0.074058	4.841e-05	0.001791	1
hsa-miR-455-5p	MBNL1	1	0.000189126	4	4	0.140034	0.0004529	0.001812	1
hsa-miR-616-5p	PRKCE	1	0.000189126	13	13	0.062256	0.0001414	0.001838	1
hsa-miR-1258	KDM5B	1	0.000189126	8	8	0.088572	0.000231	0.001848	1
hsa-miR-409-3p	SEC24B	1	0.000189126	2	2	0.107859	0.0009292	0.001858	1
hsa-miR-493-5p	KDM5B	1	0.000189126	8	8	0.069091	0.0002335	0.001868	1
hsa-miR-1286	HMOX1	0.997	38.6214	7	7	0.056339	0.0002671	0.00187	1
hsa-miR-330-3p	MAP3K4	0.678	87.829	7	7	0.075052	0.0002706	0.001894	1
hsa-miR-216a	CALR	0.6	93.3781	14	14	0.075579	0.0001355	0.001897	1
hsa-miR-34c-5p	BTG3	0.998	35.422	3	3	0.102598	0.000634	0.001902	1
hsa-miR-548n	APPBP2	0.918	64.8774	3	3	0.049635	0.000634	0.001902	1
hsa-miR-181d	UBE3C	1	0.000189126	20	20	0.07571	9.544e-05	0.001909	1
hsa-miR-30e-3p	MAP3K4	0.979	51.6176	7	7	0.097982	0.0002729	0.00191	1
hsa-miR-183-3p	PSMB2	1	0.000189126	44	43	0.099495	4.478e-05	0.001926	1
hsa-miR-1276	MBNL1	1	0.000189126	4	4	0.131268	0.0004817	0.001927	1
hsa-miR-129-1-3p	SOX4	0.988	47.4918	4	4	0.068557	0.0004817	0.001927	1
hsa-miR-146b-5p	MBNL1	1	0.000189126	4	4	0.144409	0.0004817	0.001927	1
hsa-miR-155-3p	SOX4	1	0.000189126	4	4	0.16465	0.0004817	0.001927	1
hsa-miR-19a-5p	MBNL1	0.69	86.3239	4	4	0.097365	0.0004817	0.001927	1
hsa-miR-3074-3p	SOX4	0.922	64.3227	4	4	0.093558	0.0004817	0.001927	1
hsa-miR-3619-5p	MBNL1	0.995	41.8528	4	4	0.147124	0.0004817	0.001927	1
hsa-miR-488-3p	SOX4	0.972	53.8807	4	4	0.134811	0.0004817	0.001927	1
hsa-miR-494	SOX4	0.787	79.0687	4	4	0.110669	0.0004817	0.001927	1
hsa-miR-518a-5p	SOX4	0.652	89.4116	4	4	0.068471	0.0004817	0.001927	1
hsa-miR-548f	SOX4	0.703	85.4061	4	4	0.138161	0.0004817	0.001927	1
hsa-miR-1285-3p	EPAS1	0.994	42.9842	37	37	0.076846	5.223e-05	0.001933	1
hsa-miR-424-5p	PRKACA	0.886	69.2789	6	6	0.078323	0.0003229	0.001937	1
hsa-miR-204-5p	PPP1CC	1	0.000189126	35	35	0.083991	5.537e-05	0.001938	1
hsa-miR-30a-3p	FOXJ3	0.964	56.4165	7	7	0.070848	0.0002774	0.001942	1
hsa-miR-29a-5p	RGS2	1	0.000189126	9	9	0.098484	0.0002174	0.001957	1
hsa-miR-511	HINT1	1	0.000189126	16	16	0.132488	0.0001226	0.001962	1
hsa-miR-376c	HDAC1	0.997	38.6214	7	7	0.075494	0.0002809	0.001966	1
hsa-miR-93-5p	EIF4A2	0.983	50.1019	32	32	0.200462	6.152e-05	0.001969	1
hsa-miR-1270	SCAF8	0.96	57.3267	6	6	0.146858	0.0003288	0.001973	1
hsa-miR-18b-3p	SCAF8	0.996	40.3642	6	6	0.154205	0.0003288	0.001973	1
hsa-miR-361-5p	SCAF8	0.953	58.8222	6	6	0.103949	0.0003288	0.001973	1
hsa-miR-3680-5p	SCAF8	1	0.000189126	6	6	0.092201	0.0003288	0.001973	1
hsa-miR-9-3p	DICER1	0.994	42.9842	10	10	0.189288	0.0001994	0.001994	1
hsa-miR-501-5p	STXBP1	1	0.000189126	10	10	0.088546	0.0002004	0.002004	1
hsa-miR-3622a-3p	MBNL1	1	0.000189126	4	4	0.11463	0.0005016	0.002006	1
hsa-miR-142-5p	APPBP2	1	0.000189126	3	3	0.159915	0.0006708	0.002012	1
hsa-miR-146b-5p	PPP4R1	0.996	40.3642	3	3	0.139358	0.0006708	0.002012	1
hsa-miR-301a-3p	CMPK1	0.998	35.422	3	3	0.17341	0.0006708	0.002012	1
hsa-miR-500a-3p	PPP4R1	0.999	30.3054	3	3	0.152284	0.0006708	0.002012	1
hsa-miR-1910	CSNK1A1	1	0.000189126	33	33	0.080397	6.109e-05	0.002016	1
hsa-miR-411-3p	SLC35A1	0.711	84.8608	8	8	0.083179	0.000252	0.002016	1
hsa-miR-607	STXBP1	0.997	38.6214	10	10	0.057963	0.0002018	0.002018	1
hsa-miR-330-3p	KLF5	0.951	59.2129	33	33	0.069781	6.171e-05	0.002036	1
hsa-miR-606	PPP2CA	0.991	45.6945	9	9	0.029549	0.0002268	0.002041	1
hsa-miR-142-5p	ID1	0.996	40.3642	11	11	0.113598	0.0001866	0.002053	1
hsa-miR-205-3p	LYPLA1	0.52	98.7671	19	19	0.058463	0.0001085	0.002061	1
hsa-miR-26b-5p	FOXJ3	1	0.000189126	7	7	0.069901	0.0002957	0.00207	1
hsa-miR-502-5p	SEC24B	1	0.000189126	2	2	0.107077	0.001037	0.002074	1
hsa-miR-875-3p	CEBPZ	1	0.000189126	27	27	0.012578	7.706e-05	0.002081	1
hsa-miR-3615	DCUN1D4	0.543	96.8889	19	19	0.073863	0.0001098	0.002086	1
hsa-miR-92a-3p	MTF2	0.997	38.6214	57	57	0.076138	3.671e-05	0.002092	1
hsa-miR-16-2-3p	SCAF8	0.539	97.1398	6	6	0.084713	0.0003492	0.002095	1
hsa-miR-20a-5p	EPAS1	0.996	40.3642	37	37	0.19792	5.71e-05	0.002113	1
hsa-miR-556-3p	DICER1	0.941	61.4501	10	10	0.095292	0.0002117	0.002117	1
hsa-miR-29a-5p	FOXJ3	0.966	55.8939	7	7	0.069918	0.0003038	0.002127	1
hsa-miR-154-5p	E2F5	0.967	55.6329	10	10	0.055734	0.0002141	0.002141	1
hsa-miR-27a-3p	PDS5B	0.997	38.6214	56	56	0.077792	3.837e-05	0.002149	1
hsa-miR-514a-3p	HDAC2	1	0.000189126	7	7	0.148977	0.0003071	0.00215	1
hsa-miR-493-5p	KDM3A	1	0.000189126	34	34	0.05908	6.353e-05	0.00216	1
hsa-miR-3143	PTK2	0.935	62.4278	32	32	0.054943	6.766e-05	0.002165	1
hsa-miR-29a-5p	SNX17	0.617	91.6043	39	39	0.085339	5.585e-05	0.002178	1
hsa-miR-1280	CTNND1	0.99	46.3194	8	8	0.035469	0.0002724	0.002179	1
hsa-miR-548l	SEC24B	0.554	96.1989	2	2	0.084253	0.001093	0.002186	1
hsa-let-7d-5p	SLC25A4	0.805	77.7236	16	16	0.100929	0.0001375	0.0022	1
hsa-miR-944	SMAD3	0.993	43.8171	6	6	0.091344	0.0003714	0.002228	1
hsa-miR-218-5p	SCAF8	0.995	41.8528	6	6	0.067991	0.0003729	0.002237	1
hsa-miR-106b-5p	CMPK1	1	0.000189126	3	3	0.180522	0.0007492	0.002248	1
hsa-miR-1284	APPBP2	0.826	76.103	3	3	0.084505	0.0007492	0.002248	1
hsa-miR-340-5p	KLF5	1	0.000189126	33	33	0.064505	6.843e-05	0.002258	1
hsa-miR-943	FOXJ3	0.703	85.4061	7	7	0.070984	0.0003229	0.00226	1
hsa-miR-18b-3p	NRBP1	0.965	56.1655	29	29	0.12852	7.801e-05	0.002262	1
hsa-miR-346	CSNK1D	1	0.000189126	71	70	0.076706	3.251e-05	0.002276	1
hsa-miR-495	ESR1	0.765	81.2149	43	43	0.071438	5.322e-05	0.002288	1
hsa-miR-130b-5p	IGFBP2	1	0.000189126	38	38	0.12074	6.032e-05	0.002292	1
hsa-miR-3939	MACF1	0.912	66.1708	15	15	0.070321	0.0001528	0.002292	1
hsa-miR-409-5p	IRS2	0.998	35.422	36	36	0.078451	6.379e-05	0.002296	1
hsa-miR-301a-3p	SEC24B	0.844	74.0067	2	2	0.150534	0.00115	0.0023	1
hsa-miR-3613-3p	KDM5B	0.997	38.6214	8	8	0.06456	0.0002875	0.0023	1
hsa-miR-433	HS2ST1	0.962	56.8946	6	6	0.063469	0.0003836	0.002302	1
hsa-miR-106a-5p	EIF4A2	0.997	38.6214	32	32	0.119028	7.22e-05	0.00231	1
hsa-miR-487b	SOX4	0.926	63.7746	4	4	0.118273	0.0005774	0.00231	1
hsa-miR-527	SOX4	0.902	67.4195	4	4	0.066655	0.0005774	0.00231	1
hsa-miR-550a-3p	MBNL1	0.733	83.411	4	4	0.131234	0.0005774	0.00231	1
hsa-miR-655	SOX4	0.979	51.6176	4	4	0.108223	0.0005774	0.00231	1
hsa-miR-876-5p	MBNL1	0.93	63.2023	4	4	0.111249	0.0005774	0.00231	1
hsa-miR-548o-3p	PAFAH1B1	1	0.000189126	12	11	0.059964	0.0002102	0.002312	1
hsa-miR-488-3p	MBNL1	0.947	60.0144	4	4	0.104789	0.0005809	0.002324	1
hsa-miR-143-3p	KTN1	0.992	44.957	8	8	0.076273	0.0002924	0.002339	1
hsa-miR-137	KDM5B	0.998	35.422	8	8	0.10684	0.0002925	0.00234	1
hsa-miR-335-5p	PRKACA	0.608	92.8824	6	6	0.080991	0.000392	0.002352	1
hsa-miR-605	NCOA3	0.989	46.9549	16	16	0.075394	0.000147	0.002352	1
hsa-miR-582-3p	PPP1CC	1	0.000189126	35	35	0.107311	6.748e-05	0.002362	1
hsa-miR-17-5p	MTF2	0.999	30.3054	57	57	0.098369	4.145e-05	0.002363	1
hsa-miR-942	RALBP1	0.73	83.5973	21	21	0.122968	0.000113	0.002373	1
hsa-miR-205-3p	SMURF2	1	0.000189126	12	12	0.070862	0.0002003	0.002404	1
hsa-miR-222-5p	FOXJ3	1	0.000189126	7	7	0.090389	0.0003442	0.002409	1
hsa-miR-16-1-3p	DCUN1D4	0.586	94.2564	19	19	0.073123	0.0001277	0.002426	1
hsa-miR-409-3p	NR3C1	0.654	89.2887	9	9	0.064533	0.0002704	0.002434	1
hsa-miR-520a-5p	FOXJ3	0.919	64.7361	7	7	0.032627	0.000349	0.002443	1
hsa-miR-195-3p	STK3	1	0.000189126	11	11	0.090612	0.0002236	0.00246	1
hsa-miR-3127-5p	VAMP7	0.834	74.8807	43	43	0.112778	5.771e-05	0.002482	1
hsa-miR-495	TNFRSF21	1	0.000189126	22	22	0.063595	0.0001131	0.002488	1
hsa-miR-199a-5p	APPBP2	1	0.000189126	3	3	0.113718	0.000832	0.002496	1
hsa-miR-296-3p	BTG3	0.984	49.3046	3	3	0.110961	0.000832	0.002496	1
hsa-miR-301b	CMPK1	1	0.000189126	3	3	0.170306	0.000832	0.002496	1
hsa-miR-19b-3p	MTF2	1	0.000189126	57	57	0.073624	4.391e-05	0.002503	1
hsa-miR-374c-5p	ACLY	0.777	79.7981	32	32	0.069103	7.841e-05	0.002509	1
hsa-miR-18a-3p	SUZ12	0.703	85.4061	52	52	0.184554	4.849e-05	0.002521	1
hsa-miR-3679-3p	DDIT4	0.642	90.0423	4	4	0.060899	0.0006322	0.002529	1
hsa-miR-577	PDS5B	1	0.000189126	56	56	0.199445	4.517e-05	0.00253	1
hsa-miR-3160-3p	FANCA	0.999	30.3054	5	5	0.055435	0.0005067	0.002534	1
hsa-miR-31-5p	PPP1CC	0.803	77.866	35	35	0.113809	7.246e-05	0.002536	1
hsa-miR-3691-5p	BAG6	0.66	88.9426	37	37	0.089825	6.883e-05	0.002547	1
hsa-miR-30e-3p	FOXJ3	0.977	52.3486	7	7	0.075256	0.0003656	0.002559	1
hsa-miR-16-5p	DICER1	0.999	30.3054	10	10	0.089978	0.0002561	0.002561	1
hsa-miR-545-3p	DICER1	1	0.000189126	10	10	0.065213	0.0002561	0.002561	1
hsa-miR-34b-3p	FOXJ3	0.613	92.5829	7	7	0.090753	0.0003673	0.002571	1
hsa-miR-487b	PPP1CC	0.997	38.6214	35	35	0.085609	7.352e-05	0.002573	1
hsa-let-7g-3p	SNX2	1	0.000189126	1	1	0.136426	0.002575	0.002575	1
hsa-let-7g-5p	TJP1	0.995	41.8528	1	1	0.133508	0.002575	0.002575	1
hsa-miR-105-5p	PLXNA2	0.849	73.5655	1	1	0.2888	0.002575	0.002575	1
hsa-miR-105-5p	TJP1	1	0.000189126	1	1	0.2888	0.002575	0.002575	1
hsa-miR-1227	TJP1	0.561	95.7704	1	1	0.148304	0.002575	0.002575	1
hsa-miR-130a-3p	SNX2	1	0.000189126	1	1	0.184372	0.002575	0.002575	1
hsa-miR-130a-5p	TJP1	1	0.000189126	1	1	0.17128	0.002575	0.002575	1
hsa-miR-138-5p	TJP1	1	0.000189126	1	1	0.233765	0.002575	0.002575	1
hsa-miR-16-5p	TJP1	0.951	59.2129	1	1	0.137572	0.002575	0.002575	1
hsa-miR-200c-3p	TJP1	1	0.000189126	1	1	0.157539	0.002575	0.002575	1
hsa-miR-29c-3p	TATDN2	1	0.000189126	1	1	0.136441	0.002575	0.002575	1
hsa-miR-30e-5p	PLXNA2	0.895	68.2732	1	1	0.163543	0.002575	0.002575	1
hsa-miR-3136-5p	TJP1	0.988	47.4918	1	1	0.13302	0.002575	0.002575	1
hsa-miR-32-3p	TJP1	1	0.000189126	1	1	0.128433	0.002575	0.002575	1
hsa-miR-324-3p	TJP1	0.744	82.6795	1	1	0.145766	0.002575	0.002575	1
hsa-miR-335-3p	PLXNA2	0.977	52.3486	1	1	0.148873	0.002575	0.002575	1
hsa-miR-335-3p	TJP1	0.997	38.6214	1	1	0.148873	0.002575	0.002575	1
hsa-miR-340-5p	POLR1C	1	0.000189126	1	1	0.128218	0.002575	0.002575	1
hsa-miR-340-5p	TJP1	1	0.000189126	1	1	0.128218	0.002575	0.002575	1
hsa-miR-362-3p	TJP1	0.819	76.642	1	1	0.158212	0.002575	0.002575	1
hsa-miR-3662	SNX2	0.996	40.3642	1	1	0.151869	0.002575	0.002575	1
hsa-miR-3662	TJP1	0.507	99.562	1	1	0.151869	0.002575	0.002575	1
hsa-miR-374a-5p	PLXNA2	0.997	38.6214	1	1	0.130448	0.002575	0.002575	1
hsa-miR-374b-5p	PLXNA2	0.998	35.422	1	1	0.132467	0.002575	0.002575	1
hsa-miR-3935	PLXNA2	0.772	80.1737	1	1	0.04994	0.002575	0.002575	1
hsa-miR-512-3p	TJP1	0.999	30.3054	1	1	0.183054	0.002575	0.002575	1
hsa-miR-518c-5p	TJP1	0.593	93.8313	1	1	0.186762	0.002575	0.002575	1
hsa-miR-519b-3p	TJP1	0.796	78.4065	1	1	0.091253	0.002575	0.002575	1
hsa-miR-520a-3p	TJP1	0.725	83.9182	1	1	0.153639	0.002575	0.002575	1
hsa-miR-545-5p	PLXNA2	1	0.000189126	1	1	0.140504	0.002575	0.002575	1
hsa-miR-548d-3p	PLXNA2	1	0.000189126	1	1	0.196178	0.002575	0.002575	1
hsa-miR-548d-3p	TJP1	1	0.000189126	1	1	0.196178	0.002575	0.002575	1
hsa-miR-589-3p	SNX2	0.999	30.3054	1	1	0.16261	0.002575	0.002575	1
hsa-miR-873-5p	SNX2	0.761	81.5593	1	1	0.135974	0.002575	0.002575	1
hsa-miR-876-5p	PLXNA2	0.959	57.5439	1	1	0.134651	0.002575	0.002575	1
hsa-miR-19a-5p	PDS5B	1	0.000189126	56	56	0.054314	4.602e-05	0.002577	1
hsa-miR-3622a-3p	STK39	0.916	65.1724	32	32	0.084294	8.107e-05	0.002594	1
hsa-miR-103a-3p	ALDOC	0.724	83.985	18	18	0.05926	0.0001443	0.002597	1
hsa-miR-1827	FAF1	1	0.000189126	24	24	0.030148	0.0001082	0.002597	1
hsa-miR-424-5p	NBR1	0.998	35.422	11	10	0.082358	0.0002612	0.002612	1
hsa-miR-223-5p	PDS5B	0.984	49.3046	56	56	0.099544	4.677e-05	0.002619	1
hsa-miR-3926	STK39	0.598	93.5035	32	32	0.049839	8.225e-05	0.002632	1
hsa-miR-16-1-3p	SUZ12	0.999	30.3054	52	52	0.074304	5.076e-05	0.00264	1
hsa-miR-1827	BCL2L13	0.605	93.0717	14	14	0.044337	0.0001892	0.002649	1
hsa-miR-490-5p	HSPD1	0.877	70.3655	14	14	0.046975	0.0001892	0.002649	1
hsa-miR-26a-5p	TOP1	1	0.000189126	33	33	0.069581	8.029e-05	0.00265	1
hsa-miR-494	PRKCE	0.81	77.3217	13	13	0.06153	0.000204	0.002652	1
hsa-miR-301b	RALBP1	0.987	48	21	21	0.1114	0.0001267	0.002661	1
hsa-miR-32-3p	CALR	0.905	67.048	14	14	0.070477	0.0001904	0.002666	1
hsa-let-7g-3p	MBNL1	0.847	73.7459	4	4	0.090649	0.0006681	0.002672	1
hsa-miR-30e-5p	NEK4	0.742	82.8066	20	20	0.061328	0.0001338	0.002676	1
hsa-miR-449a	BAMBI	0.927	63.6439	7	7	0.145613	0.0003831	0.002682	1
hsa-miR-1304-5p	EIF4A2	0.982	50.4983	32	32	0.077201	8.394e-05	0.002686	1
hsa-miR-3160-3p	LIPA	1	0.000189126	18	18	0.053003	0.0001495	0.002691	1
hsa-miR-32-3p	RAF1	0.97	54.8638	47	47	0.069148	5.777e-05	0.002715	1
hsa-miR-1263	CLK3	0.984	49.3046	27	27	0.0062	0.0001008	0.002722	1
hsa-miR-224-5p	MBNL1	1	0.000189126	4	4	0.234352	0.0006816	0.002726	1
hsa-miR-301a-3p	MBNL1	1	0.000189126	4	4	0.178876	0.0006816	0.002726	1
hsa-miR-3136-5p	MBNL1	0.869	71.7164	4	4	0.110061	0.0006816	0.002726	1
hsa-miR-495	SOX4	1	0.000189126	4	4	0.116828	0.0006816	0.002726	1
hsa-miR-499a-5p	SOX4	1	0.000189126	4	4	0.090214	0.0006816	0.002726	1
hsa-miR-514b-5p	SOX4	0.692	86.1934	4	4	0.076628	0.0006816	0.002726	1
hsa-miR-570-3p	FOXJ3	0.974	53.3216	7	7	0.084636	0.0003894	0.002726	1
hsa-miR-573	SOX4	0.976	52.641	4	4	0.096434	0.0006816	0.002726	1
hsa-miR-9-5p	MBNL1	1	0.000189126	4	4	0.228007	0.0006816	0.002726	1
hsa-miR-3176	CLK3	0.551	96.3922	27	27	0.090573	0.000101	0.002727	1
hsa-miR-1266	HRSP12	1	0.000189126	21	21	0.09797	0.0001302	0.002734	1
hsa-miR-589-5p	IRAK1	0.992	44.957	29	29	0.084872	9.434e-05	0.002736	1
hsa-miR-577	DICER1	0.709	84.9919	10	10	0.248758	0.0002751	0.002751	1
hsa-miR-20b-3p	SCAF8	0.999	30.3054	6	6	0.143372	0.0004593	0.002756	1
hsa-miR-3912	PANK2	1	0.000189126	6	6	0.088786	0.0004593	0.002756	1
hsa-miR-140-3p	APPBP2	0.992	44.957	3	3	0.151721	0.000919	0.002757	1
hsa-miR-7-1-3p	CMPK1	0.998	35.422	3	3	0.108611	0.000919	0.002757	1
hsa-miR-223-5p	KLF5	1	0.000189126	33	33	0.078374	8.379e-05	0.002765	1
hsa-miR-382-5p	NTRK3	0.924	64.0462	12	12	0.097336	0.0002318	0.002782	1
hsa-miR-630	TNKS2	0.551	96.3922	8	8	0.043374	0.0003516	0.002813	1
hsa-miR-3065-3p	KDM5B	1	0.000189126	8	8	0.133129	0.0003523	0.002818	1
hsa-miR-411-5p	SRF	0.9	67.6685	7	7	0.078536	0.0004028	0.00282	1
hsa-miR-3661	STK39	0.788	78.9981	32	32	0.071857	8.815e-05	0.002821	1
hsa-miR-106a-5p	PTK2	0.963	56.6374	32	32	0.135685	8.866e-05	0.002837	1
hsa-miR-181a-3p	CSNK2A2	0.923	64.1831	5	5	0.067448	0.0005692	0.002846	1
hsa-miR-485-5p	SRF	0.577	94.8051	7	7	0.076098	0.0004088	0.002862	1
hsa-miR-655	SRF	0.999	30.3054	7	7	0.092661	0.0004088	0.002862	1
hsa-miR-570-3p	KLF5	0.999	30.3054	33	33	0.087792	8.704e-05	0.002872	1
hsa-miR-1266	MBNL1	0.948	59.7998	4	4	0.08462	0.0007186	0.002874	1
hsa-miR-539-5p	ESR1	0.682	87.592	43	43	0.062918	6.707e-05	0.002884	1
hsa-miR-106b-5p	EP300	1	0.000189126	20	20	0.11691	0.0001452	0.002904	1
hsa-miR-2355-5p	HMGCL	0.572	95.1007	18	18	0.091209	0.0001614	0.002905	1
hsa-miR-92a-2-5p	MED1	0.899	67.7898	19	19	0.062881	0.0001531	0.002909	1
hsa-miR-493-5p	FOXJ3	0.568	95.3528	7	7	0.071238	0.0004164	0.002915	1
hsa-miR-513b	ATP6V0B	0.997	38.6214	5	5	0.06379	0.0005848	0.002924	1
hsa-miR-9-3p	BTG1	1	0.000189126	30	30	0.162646	9.786e-05	0.002936	1
hsa-miR-1260a	ARID4B	1	0.000189126	13	13	0.013884	0.0002262	0.002941	1
hsa-miR-144-3p	MEGF9	0.994	42.9842	11	11	0.123398	0.0002684	0.002952	1
hsa-miR-146a-5p	PDS5B	0.988	47.4918	56	56	0.079016	5.272e-05	0.002952	1
hsa-miR-143-3p	STK39	0.89	68.8581	32	32	0.053398	9.252e-05	0.002961	1
hsa-miR-20a-5p	EIF4A2	0.996	40.3642	32	32	0.087563	9.279e-05	0.002969	1
hsa-miR-135b-5p	PDS5B	0.994	42.9842	56	56	0.190706	5.319e-05	0.002979	1
hsa-miR-148a-3p	DCUN1D4	1	0.000189126	19	19	0.073589	0.0001568	0.002979	1
hsa-miR-616-3p	PPP1CC	1	0.000189126	35	35	0.075148	8.518e-05	0.002981	1
hsa-miR-3676-3p	MACF1	1	0.000189126	15	15	0.103401	0.000199	0.002985	1
hsa-miR-148a-3p	CALM1	0.975	52.9929	12	12	0.068678	0.0002488	0.002986	1
hsa-miR-450b-5p	STK39	1	0.000189126	32	32	0.067007	9.334e-05	0.002987	1
hsa-miR-3667-5p	CLK4	0.999	30.3054	29	29	0.082835	0.0001033	0.002996	1
hsa-miR-17-5p	EIF4A2	0.997	38.6214	32	32	0.206541	9.393e-05	0.003006	1
hsa-miR-3150b-3p	CSK	0.755	81.9527	7	7	0.113126	0.0004312	0.003018	1
hsa-miR-363-3p	IRS2	0.984	49.3046	36	36	0.081814	8.402e-05	0.003025	1
hsa-miR-501-5p	EP300	0.718	84.3956	20	20	0.100971	0.0001513	0.003026	1
hsa-miR-93-5p	ESR1	0.65	89.5413	43	43	0.111067	7.043e-05	0.003028	1
hsa-miR-299-5p	APPBP2	0.876	71.0221	3	3	0.101504	0.00101	0.00303	1
hsa-miR-450b-5p	BTG3	0.999	30.3054	3	3	0.099432	0.00101	0.00303	1
hsa-miR-548q	BTG3	0.861	72.4825	3	3	0.076624	0.00101	0.00303	1
hsa-miR-574-3p	BTG3	1	0.000189126	3	3	0.09383	0.00101	0.00303	1
hsa-miR-195-5p	SGK1	1	0.000189126	6	6	0.079309	0.0005054	0.003032	1
hsa-miR-556-3p	KLF5	1	0.000189126	33	33	0.074687	9.228e-05	0.003045	1
hsa-miR-1	PTPN1	0.525	98.4497	2	2	0.09619	0.001526	0.003052	1
hsa-miR-340-5p	USP7	1	0.000189126	56	54	0.067898	5.653e-05	0.003053	1
hsa-miR-513c-5p	SOX4	1	0.000189126	4	4	0.061063	0.0007634	0.003054	1
hsa-miR-330-3p	SCAF8	0.969	55.1026	6	6	0.08772	0.0005093	0.003056	1
hsa-miR-103a-2-5p	KLF5	0.887	69.1609	33	33	0.06411	9.321e-05	0.003076	1
hsa-miR-7-2-3p	KLF5	0.963	56.6374	33	33	0.047933	9.321e-05	0.003076	1
hsa-miR-379-5p	TCF7L2	1	0.000189126	5	5	0.067451	0.0006214	0.003107	1
hsa-miR-221-3p	FOXJ3	0.86	72.5746	7	7	0.089978	0.0004442	0.003109	1
hsa-miR-545-5p	FOXJ3	0.999	30.3054	7	7	0.067701	0.0004442	0.003109	1
hsa-miR-1273c	SOX4	0.984	49.3046	4	4	0.045535	0.0007942	0.003177	1
hsa-miR-19b-1-5p	MBNL1	0.999	30.3054	4	4	0.176269	0.0007942	0.003177	1
hsa-miR-511	SOX4	0.998	35.422	4	4	0.148694	0.0007942	0.003177	1
hsa-miR-548b-3p	MBNL1	0.997	38.6214	4	4	0.15413	0.0007942	0.003177	1
hsa-miR-645	TCF12	0.986	48.4564	11	11	0.014411	0.0002889	0.003178	1
hsa-miR-10b-5p	NONO	1	0.000189126	24	24	0.061317	0.0001326	0.003182	1
hsa-miR-143-3p	LASP1	0.99	46.3194	2	2	0.094393	0.001594	0.003188	1
hsa-miR-532-3p	MBNL1	1	0.000189126	4	4	0.120128	0.000797	0.003188	1
hsa-miR-324-3p	ALDOC	0.982	50.4983	18	18	0.066571	0.0001775	0.003195	1
hsa-miR-142-5p	MACF1	1	0.000189126	15	15	0.113723	0.0002133	0.0032	1
hsa-miR-15a-5p	NOTCH2	0.916	65.1724	35	35	0.078799	9.157e-05	0.003205	1
hsa-miR-148b-5p	FOXJ3	0.837	74.6204	7	7	0.082296	0.0004622	0.003235	1
hsa-miR-3145-3p	NR3C1	0.87	71.6277	9	9	0.048926	0.0003596	0.003236	1
hsa-miR-424-3p	PAFAH1B1	0.778	79.7261	12	11	0.069063	0.000297	0.003267	1
hsa-miR-301a-3p	MTF2	0.962	56.8946	57	57	0.086171	5.736e-05	0.00327	1
hsa-miR-133a	SGK1	1	0.000189126	6	6	0.09258	0.0005495	0.003297	1
hsa-miR-1301	KLF5	0.525	98.4497	33	33	0.099941	9.994e-05	0.003298	1
hsa-miR-377-5p	ELK1	0.503	99.8137	14	14	0.058652	0.0002361	0.003305	1
hsa-miR-130b-3p	CMPK1	1	0.000189126	3	3	0.172183	0.001106	0.003318	1
hsa-miR-20b-3p	HSPD1	1	0.000189126	14	14	0.096772	0.0002377	0.003328	1
hsa-miR-432-5p	PPAP2A	1	0.000189126	2	2	0.105965	0.001664	0.003328	1
hsa-miR-517c-3p	JUN	0.995	41.8528	2	2	0.038007	0.001664	0.003328	1
hsa-miR-488-5p	MEGF9	0.883	69.6177	11	11	0.062066	0.0003026	0.003329	1
hsa-miR-218-1-3p	PPP1CC	0.957	57.9431	35	35	0.045718	9.546e-05	0.003341	1
hsa-miR-182-3p	EIF4A2	0.995	41.8528	32	32	0.063689	0.0001053	0.00337	1
hsa-miR-708-3p	STK39	0.934	62.5856	32	32	0.066501	0.0001053	0.00337	1
hsa-miR-186-5p	DICER1	0.999	30.3054	10	10	0.104976	0.0003375	0.003375	1
hsa-miR-103a-3p	FOXJ3	0.797	78.3199	7	7	0.07745	0.0004837	0.003386	1
hsa-miR-3942-5p	FOXJ3	0.52	98.7671	7	7	0.06105	0.0004843	0.00339	1
hsa-miR-17-5p	ARHGAP1	0.97	54.8638	18	17	0.25045	0.0002006	0.00341	1
hsa-miR-3920	FOXJ3	0.997	38.6214	7	7	0.093055	0.0004894	0.003426	1
hsa-miR-3944-3p	EIF4A2	0.588	94.1371	32	32	0.075865	0.0001072	0.00343	1
hsa-let-7f-5p	TJP1	0.997	38.6214	1	1	0.114485	0.003433	0.003433	1
hsa-miR-1229	TJP1	0.91	66.4231	1	1	0.146116	0.003433	0.003433	1
hsa-miR-129-5p	TJP1	0.641	90.1032	1	1	0.178529	0.003433	0.003433	1
hsa-miR-148a-3p	PLXNA2	0.604	93.1338	1	1	0.128216	0.003433	0.003433	1
hsa-miR-148a-3p	SNX2	1	0.000189126	1	1	0.128216	0.003433	0.003433	1
hsa-miR-206	SNX2	0.999	30.3054	1	1	0.211478	0.003433	0.003433	1
hsa-miR-206	TJP1	0.962	56.8946	1	1	0.211478	0.003433	0.003433	1
hsa-miR-222-5p	PLXNA2	1	0.000189126	1	1	0.158652	0.003433	0.003433	1
hsa-miR-29b-1-5p	SNX2	0.911	66.3066	1	1	0.137476	0.003433	0.003433	1
hsa-miR-29b-1-5p	TJP1	0.931	63.0711	1	1	0.137476	0.003433	0.003433	1
hsa-miR-301b	SNX2	1	0.000189126	1	1	0.194624	0.003433	0.003433	1
hsa-miR-320d	POLR1C	1	0.000189126	1	1	0.130147	0.003433	0.003433	1
hsa-miR-3613-3p	PLXNA2	0.945	60.3862	1	1	0.108427	0.003433	0.003433	1
hsa-miR-363-3p	SNX2	1	0.000189126	1	1	0.127139	0.003433	0.003433	1
hsa-miR-3922-3p	SNX2	0.895	68.2732	1	1	0.1353	0.003433	0.003433	1
hsa-miR-502-3p	TJP1	0.997	38.6214	1	1	0.166205	0.003433	0.003433	1
hsa-miR-514b-5p	TJP1	1	0.000189126	1	1	0.082383	0.003433	0.003433	1
hsa-miR-616-3p	SNX2	0.995	41.8528	1	1	0.12649	0.003433	0.003433	1
hsa-miR-877-5p	POLR1C	0.903	67.2952	1	1	0.192362	0.003433	0.003433	1
hsa-miR-95	TJP1	0.992	44.957	1	1	0.130267	0.003433	0.003433	1
hsa-miR-106a-5p	SEC24B	0.791	78.7776	2	2	0.225864	0.001717	0.003434	1
hsa-miR-17-3p	SEC24B	1	0.000189126	2	2	0.263631	0.001717	0.003434	1
hsa-miR-17-5p	SEC24B	0.707	85.1356	2	2	0.267551	0.001717	0.003434	1
hsa-miR-186-5p	SEC24B	0.503	99.8137	2	2	0.202472	0.001717	0.003434	1
hsa-miR-187-5p	CTTN	1	0.000189126	2	2	0.198534	0.001717	0.003434	1
hsa-miR-18a-3p	SEC24C	0.975	52.9929	2	2	0.295404	0.001717	0.003434	1
hsa-miR-203	PTPN1	1	0.000189126	2	2	0.177603	0.001717	0.003434	1
hsa-miR-20a-5p	SEC24B	0.771	80.2465	2	2	0.24759	0.001717	0.003434	1
hsa-miR-3159	SEC24B	0.982	50.4983	2	2	0.081775	0.001717	0.003434	1
hsa-miR-500a-5p	SEC24B	0.727	83.7915	2	2	0.187746	0.001717	0.003434	1
hsa-miR-501-5p	SEC24B	0.985	48.8707	2	2	0.194452	0.001717	0.003434	1
hsa-miR-532-5p	SEC24B	0.997	38.6214	2	2	0.164113	0.001717	0.003434	1
hsa-miR-544a	HOXA10	0.993	43.8171	2	2	0.055473	0.001717	0.003434	1
hsa-miR-545-3p	PTPN1	0.764	81.3473	2	2	0.111233	0.001717	0.003434	1
hsa-miR-548l	PTPN1	0.688	87.2117	2	2	0.114769	0.001717	0.003434	1
hsa-miR-205-3p	VEGFA	0.844	74.0067	30	30	0.070862	0.0001149	0.003447	1
hsa-miR-19a-3p	BTG1	0.936	62.2593	30	30	0.140298	0.0001151	0.003453	1
hsa-miR-130b-3p	ESR1	0.969	55.1026	43	43	0.104515	8.04e-05	0.003457	1
hsa-miR-130b-5p	ESR1	0.705	85.2652	43	43	0.101296	8.04e-05	0.003457	1
hsa-miR-559	MTF2	0.913	66.0282	57	57	0.040008	6.072e-05	0.003461	1
hsa-miR-519c-3p	ATP1B1	0.948	59.7998	20	20	0.039863	0.0001734	0.003468	1
hsa-miR-3688-3p	RPA1	1	0.000189126	8	8	0.065359	0.0004345	0.003476	1
hsa-miR-3918	NIT1	1	0.000189126	5	5	0.050619	0.0006997	0.003499	1
hsa-miR-3609	FOXJ3	1	0.000189126	7	7	0.094532	0.0005035	0.003525	1
hsa-miR-629-3p	EPAS1	0.603	93.1973	37	37	0.080526	9.531e-05	0.003526	1
hsa-miR-148b-3p	DCUN1D4	1	0.000189126	19	19	0.06273	0.0001858	0.00353	1
hsa-miR-195-5p	SNX13	1	0.000189126	6	6	0.072544	0.0005891	0.003535	1
hsa-miR-142-5p	KLF5	1	0.000189126	33	33	0.089109	0.0001073	0.003541	1
hsa-miR-587	UBAP2L	1	0.000189126	12	12	0.006788	0.000296	0.003552	1
hsa-miR-9-3p	CEBPG	0.97	54.8638	46	46	0.161023	7.727e-05	0.003554	1
hsa-miR-2277-3p	SMAD1	0.918	64.8774	17	17	0.076024	0.0002096	0.003563	1
hsa-let-7f-2-3p	KLF5	0.999	30.3054	33	33	0.073172	0.0001082	0.003571	1
hsa-miR-33a-5p	KLF5	1	0.000189126	33	33	0.093364	0.0001082	0.003571	1
hsa-miR-3613-3p	HDAC1	0.7	85.5948	7	7	0.06155	0.0005102	0.003571	1
hsa-miR-362-5p	VAMP7	1	0.000189126	43	43	0.1074	8.307e-05	0.003572	1
hsa-miR-103a-2-5p	PDS5B	1	0.000189126	56	56	0.058149	6.398e-05	0.003583	1
hsa-miR-146a-3p	SCAF8	1	0.000189126	6	6	0.151265	0.0005994	0.003596	1
hsa-miR-3125	SCAF8	0.758	81.7461	6	6	0.063987	0.0005994	0.003596	1
hsa-miR-616-5p	SUZ12	0.605	93.0717	52	52	0.101082	6.925e-05	0.003601	1
hsa-miR-3919	SEC24B	0.968	55.3873	2	2	0.060253	0.001807	0.003614	1
hsa-miR-938	MBNL1	0.999	30.3054	4	4	0.075083	0.0009037	0.003615	1
hsa-miR-199b-5p	APPBP2	1	0.000189126	3	3	0.106877	0.001206	0.003618	1
hsa-miR-642a-5p	APPBP2	0.536	97.3269	3	3	0.095938	0.001206	0.003618	1
hsa-miR-148b-5p	DICER1	0.852	73.306	10	10	0.093431	0.0003627	0.003627	1
hsa-miR-15a-3p	DICER1	0.823	76.3307	10	10	0.073025	0.0003627	0.003627	1
hsa-let-7c	E2F5	0.994	42.9842	10	10	0.061248	0.0003635	0.003635	1
hsa-miR-138-1-3p	HSPD1	1	0.000189126	14	14	0.071235	0.00026	0.00364	1
hsa-miR-550a-3p	EIF4A2	0.78	79.5759	32	32	0.091403	0.000114	0.003648	1
hsa-miR-3155a	EIF4A2	1	0.000189126	32	32	0.050285	0.0001141	0.003651	1
hsa-miR-340-5p	KCNK1	0.903	67.2952	33	33	0.081203	0.0001109	0.00366	1
hsa-let-7b-3p	SOX4	1	0.000189126	4	4	0.099332	0.0009154	0.003662	1
hsa-miR-1301	MBNL1	0.999	30.3054	4	4	0.155374	0.0009154	0.003662	1
hsa-miR-3140-3p	SOX4	0.817	76.801	4	4	0.135938	0.0009154	0.003662	1
hsa-miR-452-3p	MBNL1	1	0.000189126	4	4	0.211018	0.0009154	0.003662	1
hsa-miR-214-3p	ACLY	0.999	30.3054	32	32	0.062701	0.0001145	0.003664	1
hsa-miR-1284	SCAF8	0.843	74.099	6	6	0.098434	0.000611	0.003666	1
hsa-miR-26a-2-3p	SCAF8	1	0.000189126	6	6	0.108558	0.000611	0.003666	1
hsa-miR-34c-3p	SCAF8	0.922	64.3227	6	6	0.130243	0.000611	0.003666	1
hsa-miR-3613-5p	SCAF8	0.922	64.3227	6	6	0.126614	0.000611	0.003666	1
hsa-miR-3619-5p	SCAF8	0.982	50.4983	6	6	0.152699	0.000611	0.003666	1
hsa-miR-4306	SCAF8	0.992	44.957	6	6	0.102667	0.000611	0.003666	1
hsa-miR-503	SCAF8	0.963	56.6374	6	6	0.129764	0.000611	0.003666	1
hsa-miR-125b-5p	NTRK3	0.785	79.2213	12	12	0.104733	0.0003061	0.003673	1
hsa-miR-497-5p	USP12	0.99	46.3194	12	12	0.080772	0.0003061	0.003673	1
hsa-miR-1271-5p	RGS2	1	0.000189126	9	9	0.083102	0.0004082	0.003674	1
hsa-let-7c	VEGFA	0.843	74.099	30	30	0.069886	0.0001225	0.003675	1
hsa-miR-3664-5p	SMAD1	0.679	87.7685	17	17	0.089521	0.0002166	0.003682	1
hsa-miR-129-5p	ARNT	0.998	35.422	13	13	0.131482	0.0002834	0.003684	1
hsa-miR-655	PIK3R1	0.817	76.801	39	39	0.059137	9.469e-05	0.003693	1
hsa-miR-130a-5p	EIF4A2	0.899	67.7898	32	32	0.068408	0.0001159	0.003709	1
hsa-miR-105-3p	PRKCE	0.906	66.9194	13	13	0.051647	0.000286	0.003718	1
hsa-miR-26b-5p	HS2ST1	1	0.000189126	6	6	0.072017	0.0006208	0.003725	1
hsa-miR-3136-5p	PTK2	0.924	64.0462	32	32	0.07953	0.0001169	0.003741	1
hsa-miR-379-3p	NR3C1	0.997	38.6214	9	9	0.050576	0.0004171	0.003754	1
hsa-miR-29c-5p	STK3	0.902	67.4195	11	11	0.090399	0.000342	0.003762	1
hsa-miR-146a-3p	PDS5B	0.732	83.474	56	56	0.12366	6.728e-05	0.003768	1
hsa-miR-19b-1-5p	ALDOC	1	0.000189126	18	18	0.102902	0.0002104	0.003787	1
hsa-miR-3611	BAG6	1	0.000189126	37	37	0.051544	0.0001024	0.003789	1
hsa-miR-412	TCF12	0.627	90.9435	11	11	0.059092	0.0003446	0.003791	1
hsa-miR-3143	EPS8	0.935	62.4278	34	34	0.051721	0.0001121	0.003811	1
hsa-miR-421	SUZ12	1	0.000189126	52	52	0.123902	7.371e-05	0.003833	1
hsa-miR-141-3p	KLF5	0.998	35.422	33	33	0.088572	0.0001165	0.003844	1
hsa-miR-2114-5p	NQO1	1	0.000189126	16	16	0.075362	0.0002428	0.003885	1
hsa-miR-103a-3p	PRKCE	0.999	30.3054	13	13	0.072437	0.0002993	0.003891	1
hsa-miR-577	KLF5	0.994	42.9842	33	33	0.186238	0.0001187	0.003917	1
hsa-miR-1245a	APPBP2	0.992	44.957	3	3	0.069386	0.00131	0.00393	1
hsa-miR-379-5p	IGF1R	0.969	55.1026	3	3	0.12386	0.00131	0.00393	1
hsa-miR-548t-5p	APPBP2	0.705	85.2652	3	3	0.082582	0.00131	0.00393	1
hsa-miR-944	APPBP2	0.822	76.4044	3	3	0.115077	0.00131	0.00393	1
hsa-miR-363-3p	PDS5B	1	0.000189126	56	56	0.071081	7.032e-05	0.003938	1
hsa-miR-15a-5p	SMAD7	0.997	38.6214	23	23	0.071012	0.0001713	0.00394	1
hsa-miR-532-3p	FOXJ3	0.575	94.9206	7	7	0.097301	0.0005631	0.003942	1
hsa-miR-130b-3p	EIF4A2	1	0.000189126	32	32	0.101946	0.0001234	0.003949	1
hsa-miR-142-5p	VPS26A	1	0.000189126	5	5	0.190452	0.0007987	0.003993	1
hsa-miR-23b-3p	TOP1	1	0.000189126	33	33	0.083235	0.0001221	0.004029	1
hsa-miR-96-5p	CDX2	0.952	59.0083	24	24	0.06845	0.0001685	0.004044	1
hsa-miR-16-5p	ACSL1	1	0.000189126	26	26	0.07739	0.0001557	0.004048	1
hsa-miR-340-5p	EPAS1	0.899	67.7898	37	37	0.07499	0.0001096	0.004055	1
hsa-miR-105-5p	BAG6	0.999	30.3054	37	37	0.223714	0.0001097	0.004059	1
hsa-miR-421	BTG1	0.586	94.2564	30	30	0.123902	0.0001356	0.004068	1
hsa-miR-636	CLK3	0.703	85.4061	27	27	0.088921	0.0001509	0.004074	1
hsa-miR-1226-3p	ESR1	0.851	73.4023	43	43	0.110422	9.48e-05	0.004076	1
hsa-miR-1205	ST3GAL5	0.721	84.1936	9	9	0.005822	0.0004537	0.004083	1
hsa-miR-548a-5p	PDS5B	0.679	87.7685	56	56	0.054763	7.295e-05	0.004085	1
hsa-miR-19b-1-5p	PUM2	0.98	51.2666	15	15	0.084904	0.0002731	0.004097	1
hsa-miR-16-5p	VAMP7	1	0.000189126	43	43	0.09357	9.569e-05	0.004115	1
hsa-miR-101-5p	TCFL5	1	0.000189126	17	17	0.064492	0.0002421	0.004116	1
hsa-miR-29a-5p	RALBP1	0.659	88.9968	21	21	0.094474	0.0001962	0.00412	1
hsa-miR-205-3p	PPARD	0.786	79.1438	18	18	0.071902	0.0002294	0.004129	1
hsa-miR-1227	BTG1	0.747	82.4777	30	30	0.109026	0.0001377	0.004131	1
hsa-miR-219-1-3p	DICER1	0.874	71.2283	10	10	0.084258	0.0004138	0.004138	1
hsa-miR-590-3p	MACF1	0.989	46.9549	15	15	0.103224	0.0002772	0.004158	1
hsa-miR-3616-5p	ARFIP2	1	0.000189126	38	37	0.068206	0.0001125	0.004162	1
hsa-let-7c	IRS2	0.999	30.3054	36	36	0.05539	0.0001158	0.004169	1
hsa-miR-1271-5p	RAD23B	0.999	30.3054	5	5	0.091371	0.0008347	0.004174	1
hsa-miR-22-3p	SOX4	0.998	35.422	4	4	0.111735	0.001045	0.00418	1
hsa-miR-30b-5p	SOX4	0.999	30.3054	4	4	0.122514	0.001045	0.00418	1
hsa-miR-30d-5p	SOX4	0.997	38.6214	4	4	0.119695	0.001045	0.00418	1
hsa-miR-30e-5p	MBNL1	1	0.000189126	4	4	0.122118	0.001045	0.00418	1
hsa-miR-34b-5p	SOX4	0.99	46.3194	4	4	0.113289	0.001045	0.00418	1
hsa-miR-3691-5p	MBNL1	0.999	30.3054	4	4	0.12638	0.001045	0.00418	1
hsa-miR-3928	MBNL1	0.987	48	4	4	0.111611	0.001045	0.00418	1
hsa-miR-548s	MBNL1	1	0.000189126	4	4	0.14515	0.001045	0.00418	1
hsa-miR-31-5p	RGS2	0.983	50.1019	9	9	0.134094	0.0004645	0.004181	1
hsa-miR-106b-5p	UBR7	0.639	90.2299	23	23	0.090475	0.0001822	0.004191	1
hsa-miR-383	SCAF8	0.999	30.3054	6	6	0.134493	0.0006992	0.004195	1
hsa-miR-550a-5p	PMPCB	0.999	30.3054	43	43	0.092673	9.769e-05	0.004201	1
hsa-miR-577	NOTCH2	0.985	48.8707	35	35	0.229905	0.0001202	0.004207	1
hsa-miR-135b-5p	PPP1CC	0.999	30.3054	35	35	0.196761	0.0001209	0.004232	1
hsa-miR-381	SACM1L	0.901	67.5479	9	9	0.076945	0.0004707	0.004236	1
hsa-miR-215	PAFAH1B1	0.687	87.2815	12	11	0.08287	0.0003856	0.004242	1
hsa-miR-3074-3p	BTG3	1	0.000189126	3	3	0.081879	0.001418	0.004254	1
hsa-miR-7-1-3p	BTG3	1	0.000189126	3	3	0.106352	0.001418	0.004254	1
hsa-miR-98	TGDS	1	0.000189126	3	3	0.121677	0.001418	0.004254	1
hsa-miR-19b-3p	NOTCH2	0.996	40.3642	35	35	0.126889	0.0001216	0.004256	1
hsa-miR-19a-3p	MACF1	0.996	40.3642	15	15	0.109997	0.0002849	0.004273	1
hsa-miR-2276	SRSF4	0.619	91.4666	14	14	0.076962	0.0003061	0.004285	1
hsa-miR-577	RIPK2	0.662	88.8149	11	11	0.18013	0.0003896	0.004286	1
hsa-miR-103a-2-5p	TJP1	1	0.000189126	1	1	0.124923	0.004292	0.004292	1
hsa-miR-183-5p	POLR1C	1	0.000189126	1	1	0.127655	0.004292	0.004292	1
hsa-miR-196b-5p	SNX2	1	0.000189126	1	1	0.164505	0.004292	0.004292	1
hsa-miR-200b-3p	TJP1	1	0.000189126	1	1	0.134353	0.004292	0.004292	1
hsa-miR-20b-3p	TJP1	0.7	85.5948	1	1	0.151595	0.004292	0.004292	1
hsa-miR-210	TJP1	0.705	85.2652	1	1	0.166101	0.004292	0.004292	1
hsa-miR-26b-5p	PLXNA2	0.957	57.9431	1	1	0.118114	0.004292	0.004292	1
hsa-miR-30c-5p	PLXNA2	1	0.000189126	1	1	0.123059	0.004292	0.004292	1
hsa-miR-320c	POLR1C	1	0.000189126	1	1	0.117205	0.004292	0.004292	1
hsa-miR-330-3p	PLXNA2	0.971	54.5782	1	1	0.117418	0.004292	0.004292	1
hsa-miR-330-3p	SNX2	1	0.000189126	1	1	0.117418	0.004292	0.004292	1
hsa-miR-330-3p	TJP1	0.629	90.8249	1	1	0.117418	0.004292	0.004292	1
hsa-miR-369-3p	TJP1	0.554	96.1989	1	1	0.126738	0.004292	0.004292	1
hsa-miR-519a-3p	TJP1	0.772	80.1737	1	1	0.079113	0.004292	0.004292	1
hsa-miR-628-5p	PLXNA2	0.707	85.1356	1	1	0.110951	0.004292	0.004292	1
hsa-miR-641	SNX2	0.887	69.1609	1	1	0.09169	0.004292	0.004292	1
hsa-miR-146a-3p	MTF2	0.98	51.2666	57	57	0.105875	7.536e-05	0.004296	1
hsa-miR-511	KLF5	1	0.000189126	33	33	0.07043	0.0001306	0.00431	1
hsa-miR-550a-5p	SUZ12	0.999	30.3054	52	52	0.101601	8.291e-05	0.004311	1
hsa-miR-105-5p	SPA17	1	0.000189126	17	17	0.173659	0.000254	0.004318	1
hsa-miR-16-5p	RAF1	0.998	35.422	47	47	0.082298	9.195e-05	0.004322	1
hsa-miR-28-5p	FOXJ3	0.921	64.4653	7	7	0.119908	0.0006206	0.004344	1
hsa-miR-509-3p	KLF5	0.7	85.5948	33	33	0.082449	0.0001318	0.004349	1
hsa-miR-3074-3p	RPA1	0.995	41.8528	8	8	0.067842	0.0005442	0.004354	1
hsa-miR-106a-5p	HSPD1	1	0.000189126	14	14	0.089818	0.0003128	0.004379	1
hsa-miR-34c-3p	KDM5B	1	0.000189126	8	8	0.095767	0.0005483	0.004386	1
hsa-miR-431-5p	IRS2	0.998	35.422	36	36	0.069667	0.0001221	0.004396	1
hsa-miR-1266	UNC13B	0.525	98.4497	23	23	0.09436	0.0001912	0.004398	1
hsa-miR-655	HSPA14	1	0.000189126	35	35	0.050381	0.0001258	0.004403	1
hsa-miR-4326	DICER1	0.559	95.9001	10	10	0.098811	0.0004413	0.004413	1
hsa-miR-340-5p	ESR1	1	0.000189126	43	43	0.073508	0.0001028	0.00442	1
hsa-miR-130a-5p	SMAD7	0.79	78.8491	23	23	0.082897	0.0001931	0.004441	1
hsa-miR-135a-5p	INSR	1	0.000189126	13	13	0.108286	0.0003422	0.004449	1
hsa-miR-186-5p	MACF1	0.972	53.8807	15	15	0.112655	0.0002984	0.004476	1
hsa-let-7a-2-3p	MAP3K4	1	0.000189126	7	7	0.143777	0.0006411	0.004488	1
hsa-miR-489	HDAC2	0.858	72.7596	7	7	0.120861	0.0006411	0.004488	1
hsa-miR-548e	HDAC2	0.681	87.6495	7	7	0.106661	0.0006411	0.004488	1
hsa-miR-205-3p	MAP3K4	0.997	38.6214	7	7	0.066954	0.0006419	0.004493	1
hsa-miR-106a-5p	SMAD1	1	0.000189126	17	17	0.120344	0.0002652	0.004508	1
hsa-miR-27b-3p	DCUN1D4	0.998	35.422	19	19	0.069415	0.0002377	0.004516	1
hsa-miR-15b-5p	FURIN	1	0.000189126	17	17	0.120003	0.0002669	0.004537	1
hsa-miR-181c-5p	CSNK2A2	1	0.000189126	5	5	0.083661	0.0009097	0.004549	1
hsa-miR-3678-3p	THBS1	1	0.000189126	2	2	0.064196	0.002281	0.004562	1
hsa-miR-30e-5p	SPA17	1	0.000189126	17	17	0.066647	0.0002688	0.00457	1
hsa-miR-181c-5p	CALR	1	0.000189126	14	14	0.065859	0.000328	0.004592	1
hsa-miR-3667-5p	POLB	1	0.000189126	3	3	0.108371	0.001531	0.004593	1
hsa-miR-410	IGF1R	0.993	43.8171	3	3	0.114077	0.001531	0.004593	1
hsa-miR-582-5p	BTG3	0.993	43.8171	3	3	0.142903	0.001531	0.004593	1
hsa-miR-3120-3p	FOXJ3	0.503	99.8137	7	7	0.06159	0.000657	0.004599	1
hsa-miR-3938	FOXJ3	0.519	98.8327	7	7	0.06552	0.000657	0.004599	1
hsa-miR-127-5p	PPP1CC	0.999	30.3054	35	35	0.054815	0.000132	0.00462	1
hsa-miR-519a-5p	PPP1CC	0.999	30.3054	35	35	0.169091	0.0001334	0.004669	1
hsa-miR-92a-3p	ADCY3	0.726	83.8537	28	28	0.107682	0.0001673	0.004684	1
hsa-let-7a-3p	SCAF8	0.995	41.8528	6	6	0.112758	0.0007837	0.004702	1
hsa-let-7b-3p	SCAF8	1	0.000189126	6	6	0.104447	0.0007837	0.004702	1
hsa-let-7f-1-3p	SCAF8	0.963	56.6374	6	6	0.105703	0.0007837	0.004702	1
hsa-miR-103a-3p	SCAF8	0.999	30.3054	6	6	0.108826	0.0007837	0.004702	1
hsa-miR-2110	SCAF8	1	0.000189126	6	6	0.130979	0.0007837	0.004702	1
hsa-miR-26a-1-3p	SCAF8	1	0.000189126	6	6	0.095239	0.0007837	0.004702	1
hsa-miR-3609	SCAF8	1	0.000189126	6	6	0.12817	0.0007837	0.004702	1
hsa-miR-664-3p	SCAF8	1	0.000189126	6	6	0.112601	0.0007837	0.004702	1
hsa-miR-555	KRAS	0.81	77.3217	2	2	0.019685	0.002354	0.004708	1
hsa-miR-1227	SUZ12	1	0.000189126	52	52	0.115165	9.058e-05	0.00471	1
hsa-miR-18a-3p	ESR1	0.998	35.422	43	43	0.142978	0.0001096	0.004713	1
hsa-miR-130b-3p	MBNL1	1	0.000189126	4	4	0.188236	0.001183	0.004732	1
hsa-miR-3164	MBNL1	0.991	45.6945	4	4	0.082567	0.001183	0.004732	1
hsa-miR-539-5p	SOX4	1	0.000189126	4	4	0.105675	0.001183	0.004732	1
hsa-miR-98	SLC25A4	1	0.000189126	16	16	0.121677	0.0002966	0.004746	1
hsa-miR-105-5p	PRKCE	0.824	76.2581	13	13	0.183129	0.0003653	0.004749	1
hsa-miR-217	DNMT1	0.996	40.3642	4	4	0.098317	0.001188	0.004752	1
hsa-miR-618	THBS1	1	0.000189126	2	2	0.099836	0.00238	0.00476	1
hsa-miR-548d-3p	KLF5	0.977	52.3486	33	33	0.107236	0.0001443	0.004762	1
hsa-miR-223-3p	MACF1	0.948	59.7998	15	15	0.120045	0.0003183	0.004775	1
hsa-miR-548d-3p	ST3GAL5	0.999	30.3054	9	9	0.105213	0.0005311	0.00478	1
hsa-miR-548e	PDS5B	0.984	49.3046	56	56	0.059094	8.548e-05	0.004787	1
hsa-miR-323a-3p	STK39	1	0.000189126	32	32	0.066813	0.0001497	0.00479	1
hsa-miR-501-5p	SUZ12	0.991	45.6945	52	52	0.143748	9.212e-05	0.00479	1
hsa-miR-142-5p	RAP1A	1	0.000189126	10	10	0.130673	0.0004825	0.004825	1
hsa-miR-199b-5p	RAP1A	0.997	38.6214	10	10	0.089755	0.0004825	0.004825	1
hsa-miR-1205	DICER1	0.869	71.7164	10	10	0.004538	0.0004837	0.004837	1
hsa-miR-138-5p	MEST	0.974	53.3216	10	10	0.102315	0.0004847	0.004847	1
hsa-miR-223-5p	SCAF8	0.977	52.3486	6	6	0.12565	0.0008093	0.004856	1
hsa-miR-1269a	ACAT2	0.884	69.5123	14	14	0.202509	0.0003512	0.004917	1
hsa-miR-552	HRSP12	0.988	47.4918	21	21	0.038694	0.0002342	0.004918	1
hsa-miR-875-5p	LIPA	0.666	88.5768	18	18	0.024996	0.0002743	0.004937	1
hsa-miR-141-3p	FOXJ3	0.836	74.7044	7	7	0.082557	0.0007054	0.004938	1
hsa-miR-26a-5p	DPYD	0.879	70.0445	6	6	0.064349	0.0008246	0.004948	1
hsa-miR-1287	FBXO11	1	0.000189126	13	13	0.068416	0.0003815	0.00496	1
hsa-miR-383	STK39	1	0.000189126	32	32	0.103177	0.0001557	0.004982	1
hsa-miR-450b-5p	VPS26A	1	0.000189126	5	5	0.068427	0.0009977	0.004988	1
hsa-miR-543	PDS5B	0.916	65.1724	56	56	0.061309	8.94e-05	0.005006	1
hsa-miR-519b-3p	FOXJ3	0.997	38.6214	7	7	0.053938	0.0007166	0.005016	1
hsa-miR-199a-3p	CSNK1A1	0.676	87.9604	33	33	0.051365	0.0001521	0.005019	1
hsa-miR-548k	EPAS1	1	0.000189126	37	37	0.079295	0.0001358	0.005025	1
hsa-miR-20a-5p	SUZ12	1	0.000189126	52	52	0.146227	9.698e-05	0.005043	1
hsa-miR-30e-5p	SEC24B	0.954	58.6196	2	2	0.10594	0.002523	0.005046	1
hsa-miR-582-5p	PPP1CC	1	0.000189126	35	35	0.108374	0.0001443	0.005051	1
hsa-miR-182-5p	PAFAH1B1	0.967	55.6329	12	11	0.066463	0.0004596	0.005056	1
hsa-miR-548x-3p	CDKN1B	0.744	82.6795	15	15	0.04844	0.0003372	0.005058	1
hsa-miR-29b-3p	PDS5B	1	0.000189126	56	56	0.082505	9.044e-05	0.005065	1
hsa-miR-214-3p	NBR1	0.958	57.7506	11	10	0.068228	0.000509	0.00509	1
hsa-miR-1262	STK39	0.739	83.0112	32	32	0.058632	0.0001594	0.005101	1
hsa-miR-1263	NEK7	0.704	85.3321	55	55	0.006956	9.279e-05	0.005103	1
hsa-let-7i-5p	TJP1	0.968	55.3873	1	1	0.125909	0.00515	0.00515	1
hsa-miR-1276	SNX2	1	0.000189126	1	1	0.139642	0.00515	0.00515	1
hsa-miR-1303	MAPK14	0.864	72.2049	5	5	0.007784	0.00103	0.00515	1
hsa-miR-137	PLXNA2	1	0.000189126	1	1	0.180635	0.00515	0.00515	1
hsa-miR-137	TJP1	0.999	30.3054	1	1	0.180635	0.00515	0.00515	1
hsa-miR-140-5p	SNX2	0.989	46.9549	1	1	0.16106	0.00515	0.00515	1
hsa-miR-140-5p	TJP1	0.997	38.6214	1	1	0.16106	0.00515	0.00515	1
hsa-miR-144-3p	TJP1	1	0.000189126	1	1	0.139885	0.00515	0.00515	1
hsa-miR-200a-3p	TJP1	0.88	69.9515	1	1	0.135912	0.00515	0.00515	1
hsa-miR-23b-3p	TJP1	1	0.000189126	1	1	0.121688	0.00515	0.00515	1
hsa-miR-3065-5p	PLXNA2	1	0.000189126	1	1	0.144566	0.00515	0.00515	1
hsa-miR-3065-5p	POLR1C	0.841	74.2878	1	1	0.144566	0.00515	0.00515	1
hsa-miR-3200-5p	TJP1	0.628	90.8858	1	1	0.0772	0.00515	0.00515	1
hsa-miR-3607-3p	PLXNA2	0.982	50.4983	1	1	0.103425	0.00515	0.00515	1
hsa-miR-376b	TJP1	1	0.000189126	1	1	0.116173	0.00515	0.00515	1
hsa-miR-3910	TJP1	0.961	57.1053	1	1	0.104463	0.00515	0.00515	1
hsa-miR-449c-5p	RHOBTB1	0.997	38.6214	17	16	0.170038	0.0003219	0.00515	1
hsa-miR-499a-5p	SNX2	0.999	30.3054	1	1	0.09525	0.00515	0.00515	1
hsa-miR-579	USP7	0.908	66.6779	56	54	0.070048	9.543e-05	0.005153	1
hsa-miR-449b-5p	BAMBI	0.915	65.3245	7	7	0.138407	0.0007378	0.005165	1
hsa-miR-142-3p	SCAF8	1	0.000189126	6	6	0.136698	0.0008682	0.005209	1
hsa-miR-214-3p	PPAP2A	0.574	94.9814	2	2	0.090028	0.002611	0.005222	1
hsa-miR-625-5p	ELK1	0.803	77.866	14	14	0.082643	0.0003733	0.005226	1
hsa-miR-3200-3p	SMAD7	0.932	62.9156	23	23	0.144651	0.0002274	0.00523	1
hsa-miR-3615	ABCF1	0.553	96.2587	11	11	0.088679	0.0004795	0.005274	1
hsa-miR-135b-5p	MBNL1	1	0.000189126	4	4	0.220033	0.001326	0.005304	1
hsa-miR-1254	BTG3	1	0.000189126	3	3	0.112416	0.001769	0.005307	1
hsa-miR-3127-5p	PPP4R1	0.761	81.5593	3	3	0.114481	0.001769	0.005307	1
hsa-miR-520h	CMPK1	1	0.000189126	3	3	0.041205	0.001769	0.005307	1
hsa-miR-3654	YAP1	0.917	65.0227	17	17	0.094945	0.0003125	0.005313	1
hsa-miR-301a-3p	SOX4	1	0.000189126	4	4	0.17341	0.001329	0.005316	1
hsa-miR-545-5p	MBNL1	0.989	46.9549	4	4	0.112486	0.001329	0.005316	1
hsa-miR-1270	DICER1	0.855	73.0233	10	10	0.108912	0.0005325	0.005325	1
hsa-miR-589-3p	DICER1	0.997	38.6214	10	10	0.101966	0.0005325	0.005325	1
hsa-miR-513a-5p	PSRC1	0.959	57.5439	27	27	0.045607	0.0001977	0.005338	1
hsa-miR-107	FOXJ3	0.865	72.1058	7	7	0.062914	0.0007649	0.005354	1
hsa-miR-140-5p	FOXJ3	1	0.000189126	7	7	0.08501	0.0007649	0.005354	1
hsa-miR-3653	LRP4	0.999	30.3054	11	11	0.064511	0.0004882	0.00537	1
hsa-miR-3147	UBAP2L	0.547	96.6409	12	12	0.011332	0.0004479	0.005375	1
hsa-miR-577	EIF4A2	0.999	30.3054	32	32	0.195183	0.000168	0.005376	1
hsa-miR-148a-5p	TFAP2A	0.996	40.3642	2	2	0.087282	0.002699	0.005398	1
hsa-miR-944	SENP6	0.963	56.6374	2	2	0.096167	0.002699	0.005398	1
hsa-miR-7-5p	CLK3	0.812	77.1793	27	27	0.148755	0.0002	0.0054	1
hsa-miR-424-5p	SMAD7	0.996	40.3642	23	23	0.071053	0.0002349	0.005403	1
hsa-miR-590-3p	FOXJ3	0.967	55.6329	7	7	0.093142	0.0007775	0.005442	1
hsa-miR-369-3p	SMNDC1	0.922	64.3227	3	3	0.075453	0.001815	0.005445	1
hsa-miR-668	XBP1	0.816	76.8667	3	3	0.051936	0.001815	0.005445	1
hsa-miR-26a-5p	RAP1A	0.996	40.3642	10	10	0.070389	0.0005456	0.005456	1
hsa-miR-548k	E2F5	1	0.000189126	10	10	0.070839	0.0005468	0.005468	1
hsa-miR-137	PDS5B	0.843	74.099	56	56	0.092068	9.838e-05	0.005509	1
hsa-miR-522-3p	NONO	0.682	87.592	24	24	0.059168	0.0002296	0.00551	1
hsa-miR-493-5p	BTG1	0.616	91.6892	30	30	0.055429	0.0001838	0.005514	1
hsa-miR-607	USP12	0.893	68.509	12	12	0.053626	0.0004602	0.005522	1
hsa-let-7a-3p	IRS2	0.814	77.0316	36	36	0.08409	0.0001545	0.005562	1
hsa-miR-377-3p	BTG3	1	0.000189126	3	3	0.073019	0.001854	0.005562	1
hsa-miR-145-5p	NCOA3	0.992	44.957	16	16	0.076798	0.0003477	0.005563	1
hsa-miR-3127-5p	CLK3	1	0.000189126	27	27	0.093471	0.0002066	0.005578	1
hsa-miR-544a	NR3C1	1	0.000189126	9	9	0.031426	0.0006198	0.005578	1
hsa-miR-31-5p	SNX17	0.643	89.9797	39	39	0.118846	0.0001435	0.005596	1
hsa-miR-3614-3p	AKAP9	1	0.000189126	26	26	0.085255	0.0002156	0.005606	1
hsa-miR-379-3p	MAP3K4	1	0.000189126	7	7	0.056403	0.0008008	0.005606	1
hsa-miR-106a-5p	ESR1	0.954	58.6196	43	43	0.120344	0.0001304	0.005607	1
hsa-miR-3691-5p	ESR1	0.529	98.195	43	43	0.096052	0.0001304	0.005607	1
hsa-miR-130b-5p	SUZ12	1	0.000189126	52	52	0.132016	0.0001084	0.005637	1
hsa-miR-323b-3p	BTG3	1	0.000189126	3	3	0.090787	0.001894	0.005682	1
hsa-miR-589-3p	BTG3	1	0.000189126	3	3	0.130186	0.001894	0.005682	1
hsa-miR-7-5p	PPP4R1	0.998	35.422	3	3	0.14652	0.001894	0.005682	1
hsa-miR-202-3p	PKN2	1	0.000189126	5	5	0.075939	0.001139	0.005695	1
hsa-miR-944	PKN2	1	0.000189126	5	5	0.116054	0.001139	0.005695	1
hsa-miR-3619-5p	SRSF4	0.611	92.7094	14	14	0.111776	0.0004075	0.005705	1
hsa-miR-26a-5p	STK39	0.992	44.957	32	32	0.075404	0.0001786	0.005715	1
hsa-miR-199b-3p	CSNK1A1	0.675	88.0223	33	33	0.051341	0.0001735	0.005725	1
hsa-miR-339-5p	FBXO11	0.934	62.5856	13	13	0.07644	0.0004413	0.005737	1
hsa-miR-215	TFG	1	0.000189126	5	5	0.077096	0.001148	0.00574	1
hsa-miR-301b	MTF2	0.807	77.5642	57	57	0.072121	0.0001007	0.00574	1
hsa-miR-25-3p	CSNK1A1	1	0.000189126	33	33	0.080795	0.0001741	0.005745	1
hsa-miR-3662	NPC1	1	0.000189126	32	32	0.108068	0.0001801	0.005763	1
hsa-miR-2355-5p	ATP1A3	0.73	83.5973	13	13	0.064599	0.000444	0.005772	1
hsa-miR-182-5p	MTOR	0.964	56.4165	9	9	0.074732	0.0006419	0.005777	1
hsa-miR-218-5p	KDM5A	1	0.000189126	14	14	0.064492	0.0004128	0.005779	1
hsa-miR-19b-3p	FOXJ3	1	0.000189126	7	7	0.091323	0.0008286	0.0058	1
hsa-miR-500a-5p	FOXJ3	0.676	87.9604	7	7	0.087226	0.0008286	0.0058	1
hsa-miR-3619-5p	EIF4A2	0.823	76.3307	32	32	0.130784	0.0001815	0.005808	1
hsa-miR-22-3p	BRD4	0.895	68.2732	24	24	0.045989	0.0002432	0.005837	1
hsa-miR-335-3p	NPC1	1	0.000189126	32	32	0.109653	0.0001826	0.005843	1
hsa-miR-330-3p	STK39	0.915	65.3245	32	32	0.060543	0.0001827	0.005846	1
hsa-miR-193a-5p	SCAF8	0.947	60.0144	6	6	0.106816	0.0009774	0.005864	1
hsa-miR-497-3p	SCAF8	0.634	90.5255	6	6	0.092227	0.0009774	0.005864	1
hsa-miR-625-5p	SCAF8	0.997	38.6214	6	6	0.110611	0.0009774	0.005864	1
hsa-miR-505-3p	PTK2	1	0.000189126	32	32	0.153918	0.0001835	0.005872	1
hsa-miR-656	SOX4	1	0.000189126	4	4	0.081889	0.001484	0.005936	1
hsa-miR-9-3p	MBNL1	1	0.000189126	4	4	0.212093	0.001484	0.005936	1
hsa-miR-524-5p	ABCC1	0.977	52.3486	11	11	0.02168	0.0005405	0.005945	1
hsa-miR-15a-5p	FKBP1A	0.977	52.3486	8	8	0.062003	0.0007454	0.005963	1
hsa-miR-143-5p	MAP3K4	0.99	46.3194	7	7	0.114669	0.0008524	0.005967	1
hsa-miR-1271-5p	FOXJ3	0.562	95.7085	7	7	0.09854	0.0008534	0.005974	1
hsa-miR-222-3p	SPRED2	1	0.000189126	7	7	0.137787	0.0008534	0.005974	1
hsa-miR-340-5p	RHOBTB1	0.823	76.3307	17	16	0.076774	0.000374	0.005984	1
hsa-miR-885-3p	EGFR	0.686	87.3478	7	7	0.066796	0.0008553	0.005987	1
hsa-miR-210	DICER1	0.979	51.6176	10	10	0.105289	0.0006008	0.006008	1
hsa-miR-101-3p	PLXNA2	0.802	77.9487	1	1	0.114004	0.006009	0.006009	1
hsa-miR-101-3p	TJP1	0.998	35.422	1	1	0.114004	0.006009	0.006009	1
hsa-miR-1228-3p	TJP1	0.997	38.6214	1	1	0.100014	0.006009	0.006009	1
hsa-miR-145-5p	TJP1	0.998	35.422	1	1	0.119342	0.006009	0.006009	1
hsa-miR-19b-2-5p	SNX2	0.552	96.3232	1	1	0.070277	0.006009	0.006009	1
hsa-miR-33b-5p	TJP1	0.945	60.3862	1	1	0.121857	0.006009	0.006009	1
hsa-miR-425-3p	SNX2	0.606	93.0042	1	1	0.13284	0.006009	0.006009	1
hsa-miR-506-3p	TJP1	1	0.000189126	1	1	0.075352	0.006009	0.006009	1
hsa-miR-584-5p	SNX2	0.997	38.6214	1	1	0.240958	0.006009	0.006009	1
hsa-miR-130a-3p	BTG3	0.988	47.4918	3	3	0.095174	0.002014	0.006042	1
hsa-miR-15a-3p	PPP1CC	1	0.000189126	35	35	0.072141	0.0001727	0.006044	1
hsa-miR-27b-3p	SCAF8	0.511	99.3216	6	6	0.079177	0.00101	0.00606	1
hsa-miR-3938	APPBP2	0.981	50.9165	3	3	0.059405	0.002023	0.006069	1
hsa-miR-93-5p	CMPK1	1	0.000189126	3	3	0.169072	0.002023	0.006069	1
hsa-miR-519e-3p	NR1D2	0.996	40.3642	3	3	0.058568	0.002024	0.006072	1
hsa-miR-181a-5p	CALM1	0.999	30.3054	12	12	0.060776	0.0005077	0.006092	1
hsa-miR-3622a-3p	MAP3K4	0.996	40.3642	7	7	0.126721	0.0008724	0.006107	1
hsa-miR-98	DYRK3	0.984	49.3046	31	30	0.102836	0.000204	0.00612	1
hsa-miR-340-3p	MACF1	0.934	62.5856	15	15	0.094614	0.0004093	0.006139	1
hsa-miR-19b-2-5p	GTF2E2	0.996	40.3642	23	23	0.044354	0.0002674	0.00615	1
hsa-miR-548j	CDK4	1	0.000189126	29	29	0.062103	0.000213	0.006177	1
hsa-miR-3065-5p	SMARCB1	0.83	75.3113	13	13	0.109059	0.0004752	0.006178	1
hsa-miR-19a-3p	MTF2	1	0.000189126	57	57	0.085098	0.0001084	0.006179	1
hsa-miR-610	DICER1	0.607	92.9437	10	10	0.040001	0.0006182	0.006182	1
hsa-miR-95	NR3C1	0.997	38.6214	9	9	0.06657	0.0006885	0.006196	1
hsa-miR-423-5p	SRSF4	0.55	96.4558	14	14	0.075537	0.0004434	0.006208	1
hsa-miR-15b-5p	FSD1	0.998	35.422	10	10	0.097383	0.0006223	0.006223	1
hsa-miR-758	HMGA1	0.999	30.3054	5	5	0.07283	0.001246	0.00623	1
hsa-miR-500b	ESR1	0.998	35.422	43	43	0.094226	0.0001454	0.006252	1
hsa-miR-548x-3p	USP7	0.99	46.3194	56	54	0.044485	0.0001159	0.006259	1
hsa-miR-676-3p	PPP1CC	0.983	50.1019	35	35	0.069682	0.0001789	0.006262	1
hsa-miR-9-5p	KLF5	0.985	48.8707	33	33	0.148532	0.0001902	0.006277	1
hsa-miR-32-3p	EPS8	0.998	35.422	34	34	0.0645	0.0001858	0.006317	1
hsa-miR-570-3p	SMAD1	1	0.000189126	17	17	0.10683	0.0003726	0.006334	1
hsa-miR-380-3p	CSNK2A2	1	0.000189126	5	5	0.076103	0.001269	0.006345	1
hsa-miR-505-5p	MACF1	0.941	61.4501	15	15	0.139712	0.0004236	0.006354	1
hsa-miR-18b-5p	DICER1	1	0.000189126	10	10	0.129113	0.0006374	0.006374	1
hsa-miR-548f	DICER1	0.998	35.422	10	10	0.094396	0.0006374	0.006374	1
hsa-miR-93-5p	NPC1	1	0.000189126	32	32	0.136257	0.0001992	0.006374	1
hsa-miR-3140-3p	KLF5	1	0.000189126	33	33	0.110437	0.0001934	0.006382	1
hsa-miR-548f	KLF5	1	0.000189126	33	33	0.094373	0.0001934	0.006382	1
hsa-miR-1205	SRSF4	1	0.000189126	14	14	0.003978	0.0004564	0.00639	1
hsa-miR-449a	SMURF2	0.993	43.8171	12	12	0.138729	0.0005354	0.006425	1
hsa-miR-500b	STXBP1	0.998	35.422	10	10	0.097664	0.0006443	0.006443	1
hsa-miR-199b-5p	SGK1	1	0.000189126	6	6	0.068609	0.001074	0.006444	1
hsa-miR-19b-1-5p	MTF2	0.975	52.9929	57	57	0.081999	0.0001135	0.006469	1
hsa-miR-143-5p	BTG3	0.989	46.9549	3	3	0.092402	0.002157	0.006471	1
hsa-miR-29b-1-5p	BTG3	1	0.000189126	3	3	0.098453	0.002157	0.006471	1
hsa-miR-328	BTG3	1	0.000189126	3	3	0.096384	0.002157	0.006471	1
hsa-miR-454-3p	CMPK1	0.995	41.8528	3	3	0.135473	0.002157	0.006471	1
hsa-miR-654-5p	APPBP2	0.551	96.3922	3	3	0.102433	0.002157	0.006471	1
hsa-miR-545-5p	PDS5B	0.969	55.1026	56	56	0.070312	0.0001163	0.006513	1
hsa-miR-32-3p	CLK4	0.963	56.6374	29	29	0.062427	0.0002247	0.006516	1
hsa-miR-488-3p	BMPR1A	0.999	30.3054	21	21	0.082131	0.0003105	0.006521	1
hsa-miR-513b	GATA3	0.999	30.3054	14	14	0.061933	0.000466	0.006524	1
hsa-miR-223-3p	FOXJ3	0.999	30.3054	7	7	0.090324	0.0009327	0.006529	1
hsa-miR-17-5p	SMAD1	1	0.000189126	17	17	0.196928	0.0003845	0.006537	1
hsa-miR-200c-3p	SRF	0.997	38.6214	7	7	0.091862	0.0009341	0.006539	1
hsa-let-7c	SCYL3	0.971	54.5782	22	22	0.066635	0.0002979	0.006554	1
hsa-miR-337-3p	RAP1A	1	0.000189126	10	10	0.101247	0.0006556	0.006556	1
hsa-miR-3662	CSNK2A2	0.551	96.3922	5	5	0.131267	0.001315	0.006575	1
hsa-miR-1305	SOX4	0.992	44.957	4	4	0.064567	0.001647	0.006588	1
hsa-miR-136-3p	SOX4	1	0.000189126	4	4	0.113053	0.001647	0.006588	1
hsa-miR-148b-5p	MBNL1	1	0.000189126	4	4	0.113283	0.001647	0.006588	1
hsa-miR-301b	SOX4	1	0.000189126	4	4	0.170306	0.001647	0.006588	1
hsa-miR-3161	MBNL1	0.597	93.5731	4	4	0.133935	0.001647	0.006588	1
hsa-miR-3664-5p	MBNL1	0.999	30.3054	4	4	0.126203	0.001647	0.006588	1
hsa-miR-552	MBNL1	0.998	35.422	4	4	0.050672	0.001647	0.006588	1
hsa-miR-944	VEGFA	1	0.000189126	30	30	0.093227	0.0002201	0.006603	1
hsa-miR-181a-5p	MLL	0.766	81.1377	20	20	0.06387	0.0003318	0.006636	1
hsa-miR-106a-5p	FOXJ3	1	0.000189126	7	7	0.094894	0.0009511	0.006658	1
hsa-miR-501-3p	NONO	1	0.000189126	24	24	0.113041	0.0002775	0.00666	1
hsa-miR-130a-5p	CLK4	1	0.000189126	29	29	0.093985	0.00023	0.00667	1
hsa-miR-30e-3p	PDS5B	1	0.000189126	56	56	0.067469	0.0001192	0.006675	1
hsa-miR-148b-3p	CALR	0.754	82.0166	14	14	0.057895	0.0004781	0.006693	1
hsa-miR-27b-3p	PPP1CC	0.984	49.3046	35	35	0.083496	0.0001915	0.006703	1
hsa-miR-618	FGFR3	0.665	88.6347	9	9	0.099049	0.0007482	0.006734	1
hsa-miR-27b-3p	CBFB	0.998	35.422	9	9	0.118178	0.0007488	0.006739	1
hsa-miR-20a-5p	ARHGAP1	1	0.000189126	18	17	0.203662	0.000397	0.006749	1
hsa-miR-3929	RGS2	0.52	98.7671	9	9	0.089225	0.0007504	0.006754	1
hsa-miR-19b-3p	BTG1	0.958	57.7506	30	30	0.122603	0.0002252	0.006756	1
hsa-let-7d-5p	DICER1	1	0.000189126	10	10	0.09663	0.0006757	0.006757	1
hsa-miR-382-5p	SACM1L	1	0.000189126	9	9	0.061844	0.0007523	0.006771	1
hsa-miR-3143	HS2ST1	1	0.000189126	6	6	0.065873	0.001132	0.006792	1
hsa-miR-31-5p	CALM1	0.96	57.3267	12	12	0.086756	0.0005672	0.006806	1
hsa-miR-544b	APPBP2	0.998	35.422	3	3	0.053264	0.002271	0.006813	1
hsa-miR-345-5p	EIF4A2	0.954	58.6196	32	32	0.074438	0.0002138	0.006842	1
hsa-miR-582-5p	ASAP2	1	0.000189126	3	3	0.111213	0.002284	0.006852	1
hsa-let-7d-5p	SEC24C	1	0.000189126	2	2	0.166996	0.003432	0.006864	1
hsa-let-7f-2-3p	SEC24C	0.983	50.1019	2	2	0.136507	0.003432	0.006864	1
hsa-miR-106a-3p	SENP6	0.94	61.6104	2	2	0.130873	0.003432	0.006864	1
hsa-miR-135b-5p	PTPN1	0.999	30.3054	2	2	0.333146	0.003432	0.006864	1
hsa-miR-146a-3p	SEC24C	0.992	44.957	2	2	0.197201	0.003432	0.006864	1
hsa-miR-1537	SEC24C	0.707	85.1356	2	2	0.091629	0.003432	0.006864	1
hsa-miR-181d	SEC24C	0.976	52.641	2	2	0.14204	0.003432	0.006864	1
hsa-miR-188-5p	SEC24C	0.77	80.312	2	2	0.185898	0.003432	0.006864	1
hsa-miR-224-3p	PTPN1	0.82	76.5654	2	2	0.206894	0.003432	0.006864	1
hsa-miR-2278	PTPN1	1	0.000189126	2	2	0.089814	0.003432	0.006864	1
hsa-miR-24-3p	SEC24C	0.966	55.8939	2	2	0.174699	0.003432	0.006864	1
hsa-miR-31-5p	PTPN1	0.514	99.1414	2	2	0.223384	0.003432	0.006864	1
hsa-miR-32-5p	SEC24C	0.857	72.8413	2	2	0.144067	0.003432	0.006864	1
hsa-miR-323b-3p	SENP6	0.983	50.1019	2	2	0.136657	0.003432	0.006864	1
hsa-miR-33a-5p	SEC24C	0.994	42.9842	2	2	0.160544	0.003432	0.006864	1
hsa-miR-3605-5p	PTPN1	0.667	88.5229	2	2	0.156729	0.003432	0.006864	1
hsa-miR-3684	SEC24C	0.999	30.3054	2	2	0.13545	0.003432	0.006864	1
hsa-miR-3691-5p	SEC24C	0.999	30.3054	2	2	0.161143	0.003432	0.006864	1
hsa-miR-491-5p	SEC24C	0.611	92.7094	2	2	0.134558	0.003432	0.006864	1
hsa-miR-548b-5p	SEC24B	1	0.000189126	2	2	0.146902	0.003432	0.006864	1
hsa-miR-92a-3p	SEC24C	0.991	45.6945	2	2	0.204537	0.003432	0.006864	1
hsa-miR-1179	TJP1	0.729	83.6695	1	1	0.115366	0.006867	0.006867	1
hsa-miR-15a-5p	TJP1	0.645	89.8562	1	1	0.114892	0.006867	0.006867	1
hsa-miR-194-5p	TJP1	1	0.000189126	1	1	0.115964	0.006867	0.006867	1
hsa-miR-29b-3p	TATDN2	0.619	91.4666	1	1	0.11236	0.006867	0.006867	1
hsa-miR-34b-3p	SNX2	1	0.000189126	1	1	0.121863	0.006867	0.006867	1
hsa-miR-3613-3p	SNRPD1	0.729	83.6695	1	1	0.102169	0.006867	0.006867	1
hsa-miR-372	TJP1	1	0.000189126	1	1	0.108354	0.006867	0.006867	1
hsa-miR-376a-3p	TJP1	1	0.000189126	1	1	0.100689	0.006867	0.006867	1
hsa-miR-495	SNRPD1	0.97	54.8638	1	1	0.12095	0.006867	0.006867	1
hsa-miR-497-5p	TJP1	0.975	52.9929	1	1	0.110629	0.006867	0.006867	1
hsa-miR-506-3p	TPD52L2	0.787	79.0687	1	1	0.074628	0.006867	0.006867	1
hsa-miR-520c-3p	TJP1	0.803	77.866	1	1	0.052728	0.006867	0.006867	1
hsa-miR-129-5p	CSNK1A1	1	0.000189126	33	33	0.088339	0.0002082	0.006871	1
hsa-miR-32-5p	MYCBP2	0.999	30.3054	11	11	0.095743	0.0006247	0.006872	1
hsa-miR-543	MEGF9	0.749	82.3491	11	11	0.076292	0.0006247	0.006872	1
hsa-miR-32-5p	PTK2	1	0.000189126	32	32	0.08825	0.0002151	0.006883	1
hsa-miR-1293	SEC24B	0.971	54.5782	2	2	0.051591	0.00346	0.00692	1
hsa-miR-1256	VAPB	0.508	99.5005	9	9	0.065749	0.000769	0.006921	1
hsa-miR-181a-5p	CDX2	1	0.000189126	24	24	0.07287	0.0002885	0.006924	1
hsa-miR-381	HDAC1	0.579	94.6865	7	7	0.075372	0.0009906	0.006934	1
hsa-miR-656	HDAC4	0.816	76.8667	4	4	0.055146	0.001736	0.006944	1
hsa-miR-335-5p	CALU	0.958	57.7506	11	10	0.08129	0.0006945	0.006945	1
hsa-miR-7-2-3p	DYRK3	0.854	73.1224	31	30	0.050519	0.0002318	0.006954	1
hsa-miR-3679-5p	SCP2	1	0.000189126	9	9	0.062286	0.0007734	0.006961	1
hsa-miR-379-5p	DNMT1	0.653	89.3469	4	4	0.090597	0.001744	0.006976	1
hsa-miR-196a-5p	CSNK1A1	0.551	96.3922	33	33	0.060071	0.0002116	0.006983	1
hsa-miR-92a-3p	GPATCH8	0.694	86.0338	14	14	0.133752	0.0004991	0.006987	1
hsa-miR-548n	RAP1A	0.956	58.1657	10	10	0.052396	0.0007051	0.007051	1
hsa-miR-338-5p	FOXJ3	1	0.000189126	7	7	0.078558	0.001008	0.007056	1
hsa-miR-636	SUZ12	1	0.000189126	52	52	0.088921	0.0001358	0.007062	1
hsa-miR-3667-5p	RAF1	0.94	61.6104	47	47	0.113869	0.0001503	0.007064	1
hsa-miR-7-5p	RAF1	1	0.000189126	47	47	0.156352	0.0001503	0.007064	1
hsa-miR-485-3p	NR3C1	0.961	57.1053	9	9	0.075355	0.0007854	0.007069	1
hsa-miR-3678-5p	PTPN11	0.818	76.7188	6	6	0.072065	0.00118	0.00708	1
hsa-miR-325	CSNK1A1	0.617	91.6043	33	33	0.009996	0.0002148	0.007088	1
hsa-miR-3128	AKAP9	1	0.000189126	26	26	0.073483	0.0002732	0.007103	1
hsa-miR-101-3p	MEGF9	1	0.000189126	11	11	0.066278	0.0006468	0.007115	1
hsa-miR-135b-3p	PPP1CC	0.999	30.3054	35	35	0.18579	0.0002033	0.007116	1
hsa-miR-196a-3p	INSIG1	1	0.000189126	2	2	0.092911	0.003562	0.007124	1
hsa-miR-519a-5p	PDS5B	1	0.000189126	56	56	0.154827	0.0001273	0.007129	1
hsa-miR-501-5p	ESR1	0.538	97.2028	43	43	0.11673	0.000166	0.007138	1
hsa-miR-107	SCAF8	1	0.000189126	6	6	0.109038	0.001192	0.007152	1
hsa-miR-34b-3p	SCAF8	0.865	72.1058	6	6	0.118788	0.001192	0.007152	1
hsa-miR-3610	SCAF8	0.88	69.9515	6	6	0.109228	0.001192	0.007152	1
hsa-miR-335-3p	SMAD7	1	0.000189126	23	23	0.094128	0.000311	0.007153	1
hsa-miR-376c	DNMT1	0.999	30.3054	4	4	0.079741	0.001801	0.007204	1
hsa-miR-4306	ELK1	1	0.000189126	14	14	0.068819	0.0005152	0.007213	1
hsa-miR-34c-5p	ACSL1	0.998	35.422	26	26	0.086748	0.0002785	0.007241	1
hsa-miR-424-5p	NOTCH2	0.78	79.5759	35	35	0.091011	0.0002069	0.007241	1
hsa-miR-218-1-3p	TCF7L2	0.788	78.9981	5	5	0.053476	0.00145	0.00725	1
hsa-miR-3674	VGLL4	0.698	85.7246	10	10	0.002973	0.0007267	0.007267	1
hsa-miR-34c-5p	SOX4	0.994	42.9842	4	4	0.118445	0.001818	0.007272	1
hsa-miR-488-3p	RGS2	0.984	49.3046	9	9	0.104789	0.0008089	0.00728	1
hsa-miR-105-5p	VPS26A	0.999	30.3054	5	5	0.194031	0.001458	0.00729	1
hsa-miR-1911-3p	ID2	0.613	92.5829	25	25	0.006525	0.0002922	0.007305	1
hsa-miR-665	CDX2	0.797	78.3199	24	24	0.070283	0.0003045	0.007308	1
hsa-miR-1323	KIAA0922	1	0.000189126	9	9	0.045166	0.0008122	0.00731	1
hsa-miR-1287	BTG3	0.999	30.3054	3	3	0.094971	0.002437	0.007311	1
hsa-miR-3653	BTG3	1	0.000189126	3	3	0.093568	0.002437	0.007311	1
hsa-miR-519b-3p	DICER1	1	0.000189126	10	10	0.05329	0.0007346	0.007346	1
hsa-miR-488-5p	PPP1CC	0.997	38.6214	35	35	0.059901	0.0002115	0.007402	1
hsa-miR-302a-3p	EFNB3	0.995	41.8528	15	15	0.007786	0.0004939	0.007409	1
hsa-miR-643	CSK	1	0.000189126	7	7	0.070839	0.001062	0.007434	1
hsa-miR-328	MBNL1	0.778	79.7261	4	4	0.085923	0.00186	0.00744	1
hsa-miR-580	IRAK1	0.504	99.746	29	29	0.088514	0.0002577	0.007473	1
hsa-miR-559	MTA1	0.998	35.422	43	43	0.034999	0.000174	0.007482	1
hsa-miR-502-5p	EIF4A2	0.984	49.3046	32	32	0.068467	0.0002341	0.007491	1
hsa-miR-128	DCUN1D4	0.999	30.3054	19	19	0.078812	0.0003949	0.007503	1
hsa-miR-375	STK39	0.971	54.5782	32	32	0.085344	0.0002349	0.007517	1
hsa-miR-542-3p	CDX2	1	0.000189126	24	24	0.075083	0.0003141	0.007538	1
hsa-miR-148b-3p	PDS5A	0.952	59.0083	31	31	0.051066	0.0002436	0.007552	1
hsa-miR-92b-3p	RAP1A	1	0.000189126	10	10	0.091065	0.0007571	0.007571	1
hsa-miR-216a	VPS26A	0.953	58.8222	5	5	0.072761	0.001528	0.00764	1
hsa-miR-590-3p	EIF4A2	1	0.000189126	32	32	0.071143	0.0002389	0.007645	1
hsa-miR-96-5p	RAB27A	0.541	97.0061	7	7	0.115415	0.001093	0.007651	1
hsa-miR-29a-3p	PDS5B	1	0.000189126	56	56	0.068515	0.0001367	0.007655	1
hsa-miR-589-5p	CSNK2A2	1	0.000189126	5	5	0.094222	0.001532	0.00766	1
hsa-miR-659-3p	CSNK2A2	0.844	74.0067	5	5	0.064242	0.001532	0.00766	1
hsa-miR-3620	SCAF8	0.999	30.3054	6	6	0.104054	0.00128	0.00768	1
hsa-miR-2115-3p	RPA1	0.999	30.3054	8	8	0.121167	0.0009616	0.007693	1
hsa-miR-335-3p	KLF5	0.809	77.3958	33	33	0.083628	0.0002339	0.007719	1
hsa-miR-489	CALM1	0.92	64.6001	12	12	0.081733	0.0006436	0.007723	1
hsa-let-7i-3p	TJP1	0.999	30.3054	1	1	0.148934	0.007725	0.007725	1
hsa-miR-100-3p	PLXNA2	0.514	99.1414	1	1	0.122489	0.007725	0.007725	1
hsa-miR-1296	TGDS	0.516	99.013	3	3	0.167385	0.002575	0.007725	1
hsa-miR-148a-3p	ZNF274	0.592	93.8944	3	3	0.138418	0.002575	0.007725	1
hsa-miR-148b-3p	SNX2	0.998	35.422	1	1	0.108303	0.007725	0.007725	1
hsa-miR-148b-3p	TJP1	1	0.000189126	1	1	0.108303	0.007725	0.007725	1
hsa-miR-15b-5p	IGF1R	0.671	88.277	3	3	0.175101	0.002575	0.007725	1
hsa-miR-17-5p	USP1	0.533	97.9234	3	3	0.267551	0.002575	0.007725	1
hsa-miR-186-5p	IGF1R	0.974	53.3216	3	3	0.202472	0.002575	0.007725	1
hsa-miR-203	IGF1R	0.88	69.9515	3	3	0.177603	0.002575	0.007725	1
hsa-miR-224-5p	IGF1R	0.659	88.9968	3	3	0.299724	0.002575	0.007725	1
hsa-miR-26a-5p	PLXNA2	0.543	96.8889	1	1	0.118069	0.007725	0.007725	1
hsa-miR-3176	PAF1	0.84	74.3715	1	1	0.11908	0.007725	0.007725	1
hsa-miR-3614-3p	MBTPS1	0.996	40.3642	1	1	0.132965	0.007725	0.007725	1
hsa-miR-3678-3p	BTG3	0.998	35.422	3	3	0.101914	0.002575	0.007725	1
hsa-miR-3682-3p	IGF1R	0.998	35.422	3	3	0.183347	0.002575	0.007725	1
hsa-miR-378b	IGF1R	0.958	57.7506	3	3	0.161763	0.002575	0.007725	1
hsa-miR-380-3p	SNX2	0.989	46.9549	1	1	0.098633	0.007725	0.007725	1
hsa-miR-425-5p	BTG3	1	0.000189126	3	3	0.150623	0.002575	0.007725	1
hsa-miR-455-5p	IGF1R	0.802	77.9487	3	3	0.220472	0.002575	0.007725	1
hsa-miR-455-5p	USP1	0.589	94.0779	3	3	0.220472	0.002575	0.007725	1
hsa-miR-487a	PLXNA2	0.705	85.2652	1	1	0.096202	0.007725	0.007725	1
hsa-miR-497-3p	SNX2	1	0.000189126	1	1	0.095292	0.007725	0.007725	1
hsa-miR-497-3p	TJP1	0.812	77.1793	1	1	0.095292	0.007725	0.007725	1
hsa-miR-501-3p	TJP1	1	0.000189126	1	1	0.172354	0.007725	0.007725	1
hsa-miR-532-5p	USP1	0.925	63.8991	3	3	0.164113	0.002575	0.007725	1
hsa-miR-559	BTG3	0.993	43.8171	3	3	0.077355	0.002575	0.007725	1
hsa-miR-577	IGF1R	0.989	46.9549	3	3	0.37959	0.002575	0.007725	1
hsa-miR-577	USP1	0.996	40.3642	3	3	0.37959	0.002575	0.007725	1
hsa-miR-590-3p	USP1	1	0.000189126	3	3	0.187531	0.002575	0.007725	1
hsa-miR-92b-3p	SNX2	1	0.000189126	1	1	0.111532	0.007725	0.007725	1
hsa-miR-98	IGF1R	0.991	45.6945	3	3	0.157557	0.002575	0.007725	1
hsa-miR-548a-3p	VEGFA	0.996	40.3642	30	30	0.012079	0.0002577	0.007731	1
hsa-miR-27a-3p	BTG3	1	0.000189126	3	3	0.107062	0.002583	0.007749	1
hsa-miR-34a-5p	BTG3	0.978	52.0323	3	3	0.079288	0.002583	0.007749	1
hsa-miR-500a-5p	PPP4R1	0.696	85.8846	3	3	0.133421	0.002583	0.007749	1
hsa-miR-548d-3p	TGDS	0.649	89.602	3	3	0.147416	0.002583	0.007749	1
hsa-miR-654-3p	PTPN1	0.914	65.901	2	2	0.080213	0.003876	0.007752	1
hsa-miR-30c-5p	KDM5B	0.976	52.641	8	8	0.090092	0.0009746	0.007797	1
hsa-miR-487a	ASAP2	0.579	94.6865	3	3	0.059716	0.00262	0.00786	1
hsa-miR-30a-5p	GPR125	1	0.000189126	14	14	0.071084	0.0005615	0.007861	1
hsa-miR-3129-5p	FOXJ3	1	0.000189126	7	7	0.074683	0.001125	0.007875	1
hsa-miR-200c-3p	NPC1	0.96	57.3267	32	32	0.073661	0.0002467	0.007894	1
hsa-miR-369-3p	NBR1	0.523	98.5776	11	10	0.066123	0.0007933	0.007933	1
hsa-miR-549	SCAF8	0.952	59.0083	6	6	0.059581	0.001323	0.007938	1
hsa-miR-125b-2-3p	EIF4A2	1	0.000189126	32	32	0.052165	0.0002481	0.007939	1
hsa-miR-376a-3p	YAP1	0.656	89.1744	17	17	0.055827	0.0004671	0.007941	1
hsa-miR-424-5p	FOXJ3	1	0.000189126	7	7	0.102186	0.001136	0.007952	1
hsa-miR-577	MACF1	0.989	46.9549	15	15	0.250413	0.0005304	0.007956	1
hsa-let-7a-2-3p	INSIG1	0.835	74.7959	2	2	0.099367	0.003984	0.007968	1
hsa-miR-32-5p	TFAP2A	0.988	47.4918	2	2	0.092062	0.003984	0.007968	1
hsa-miR-3910	CSNK1A1	1	0.000189126	33	33	0.059116	0.0002416	0.007973	1
hsa-miR-140-3p	KLF5	0.998	35.422	33	33	0.077539	0.0002417	0.007976	1
hsa-miR-514b-5p	CSNK1A1	0.701	85.5366	33	33	0.054781	0.0002417	0.007976	1
hsa-miR-19b-3p	MBNL1	1	0.000189126	4	4	0.155797	0.001998	0.007992	1
hsa-miR-299-5p	SOX4	0.999	30.3054	4	4	0.101504	0.001998	0.007992	1
hsa-miR-3662	MBNL1	1	0.000189126	4	4	0.125909	0.001998	0.007992	1
hsa-miR-92a-2-5p	ELK1	0.694	86.0338	14	14	0.078187	0.0005714	0.008	1
hsa-miR-1297	HOXC9	0.847	73.7459	14	14	0.045861	0.0005726	0.008016	1
hsa-miR-488-3p	LRRC41	1	0.000189126	14	14	0.15383	0.0005726	0.008016	1
hsa-miR-3919	KDM5B	1	0.000189126	8	8	0.05498	0.001003	0.008024	1
hsa-miR-548f	MTF2	0.989	46.9549	57	57	0.055721	0.000141	0.008037	1
hsa-miR-526b-5p	STK39	0.997	38.6214	32	32	0.094904	0.0002518	0.008058	1
hsa-miR-200c-5p	CSNK1A1	0.982	50.4983	33	33	0.060395	0.0002442	0.008059	1
hsa-miR-3074-3p	KLF5	0.951	59.2129	33	33	0.051806	0.0002455	0.008101	1
hsa-miR-320d	RAP1A	0.978	52.0323	10	10	0.083271	0.0008119	0.008119	1
hsa-miR-767-5p	VPS26A	0.634	90.5255	5	5	0.1883	0.001627	0.008135	1
hsa-miR-3662	PRKCE	0.956	58.1657	13	13	0.080652	0.0006277	0.00816	1
hsa-let-7e-5p	PPP1CC	0.993	43.8171	35	35	0.060828	0.0002334	0.008169	1
hsa-let-7i-5p	IKBKE	0.911	66.3066	6	6	0.083698	0.001366	0.008196	1
hsa-miR-1184	SCAF8	1	0.000189126	6	6	0.00463	0.001366	0.008196	1
hsa-miR-139-5p	APPBP2	0.992	44.957	3	3	0.10105	0.002733	0.008199	1
hsa-miR-143-3p	CMPK1	0.645	89.8562	3	3	0.100517	0.002733	0.008199	1
hsa-miR-143-3p	IGF1R	0.945	60.3862	3	3	0.100517	0.002733	0.008199	1
hsa-miR-548d-3p	PPP4R1	0.953	58.8222	3	3	0.146998	0.002733	0.008199	1
hsa-miR-3065-5p	THBS1	0.86	72.5746	2	2	0.138639	0.004105	0.00821	1
hsa-miR-548q	THBS1	0.924	64.0462	2	2	0.088992	0.004105	0.00821	1
hsa-miR-16-5p	FOXJ3	0.99	46.3194	7	7	0.069764	0.001175	0.008225	1
hsa-miR-32-3p	NOTCH2	0.998	35.422	35	35	0.083081	0.0002358	0.008253	1
hsa-miR-103a-3p	CSNK1A1	1	0.000189126	33	33	0.063424	0.0002502	0.008257	1
hsa-miR-544a	FAM114A2	0.698	85.7246	26	26	0.04025	0.0003176	0.008258	1
hsa-miR-138-5p	MACF1	1	0.000189126	15	15	0.137251	0.000552	0.00828	1
hsa-miR-323b-3p	YAP1	0.99	46.3194	17	17	0.065061	0.0004881	0.008298	1
hsa-miR-20a-5p	ESR1	0.913	66.0282	43	43	0.132574	0.0001939	0.008338	1
hsa-miR-411-3p	AKAP9	0.981	50.9165	26	26	0.07376	0.000321	0.008346	1
hsa-miR-130b-5p	HRSP12	0.849	73.5655	21	21	0.083259	0.0003979	0.008356	1
hsa-miR-17-5p	NPC1	1	0.000189126	32	32	0.139553	0.0002619	0.008381	1
hsa-miR-29b-2-5p	MPDZ	0.822	76.4044	22	22	0.080479	0.000381	0.008382	1
hsa-miR-320b	HOXA10	0.901	67.5479	2	2	0.0772	0.004203	0.008406	1
hsa-miR-9-3p	PDS5B	1	0.000189126	56	56	0.150196	0.0001504	0.008422	1
hsa-miR-376a-5p	RPA1	0.69	86.3239	8	8	0.084008	0.001054	0.008432	1
hsa-miR-494	HS2ST1	0.979	51.6176	6	6	0.071333	0.001426	0.008556	1
hsa-miR-10a-3p	SNX2	0.99	46.3194	1	1	0.134356	0.008584	0.008584	1
hsa-miR-10a-3p	TJP1	0.999	30.3054	1	1	0.134356	0.008584	0.008584	1
hsa-miR-1262	TJP1	1	0.000189126	1	1	0.099715	0.008584	0.008584	1
hsa-miR-25-3p	SNX2	1	0.000189126	1	1	0.177905	0.008584	0.008584	1
hsa-miR-299-3p	TJP1	0.974	53.3216	1	1	0.089864	0.008584	0.008584	1
hsa-miR-3652	TJP1	0.679	87.7685	1	1	0.101539	0.008584	0.008584	1
hsa-miR-548t-5p	TJP1	0.95	59.4113	1	1	0.089407	0.008584	0.008584	1
hsa-miR-93-5p	TJP1	0.998	35.422	1	1	0.202327	0.008584	0.008584	1
hsa-miR-17-5p	PTK2	0.977	52.3486	32	32	0.207614	0.0002685	0.008592	1
hsa-miR-4324	CYTH1	0.952	59.0083	9	9	0.003167	0.0009558	0.008602	1
hsa-miR-3607-3p	GABPB1	0.993	43.8171	2	2	0.074779	0.004315	0.00863	1
hsa-miR-495	INSIG1	0.692	86.1934	2	2	0.088656	0.004315	0.00863	1
hsa-miR-146b-5p	PDS5B	0.896	68.143	56	56	0.069257	0.0001545	0.008652	1
hsa-miR-150-5p	SCAF8	0.997	38.6214	6	6	0.130925	0.001442	0.008652	1
hsa-miR-4326	PPP1CC	1	0.000189126	35	35	0.080176	0.0002473	0.008655	1
hsa-miR-485-5p	USP12	0.983	50.1019	12	12	0.064954	0.0007216	0.008659	1
hsa-miR-150-3p	APPBP2	0.995	41.8528	3	3	0.135783	0.002888	0.008664	1
hsa-miR-188-5p	PPP4R1	1	0.000189126	3	3	0.133358	0.002888	0.008664	1
hsa-miR-107	CSNK1A1	1	0.000189126	33	33	0.057203	0.0002627	0.008669	1
hsa-miR-320b	NQO1	0.551	96.3922	16	16	0.062903	0.0005419	0.00867	1
hsa-let-7d-5p	SCYL3	0.996	40.3642	22	22	0.064907	0.0003943	0.008675	1
hsa-miR-103a-2-5p	DICER1	0.623	91.2019	10	10	0.074181	0.0008678	0.008678	1
hsa-miR-155-5p	DICER1	1	0.000189126	10	10	0.099643	0.0008678	0.008678	1
hsa-miR-338-3p	STXBP1	1	0.000189126	10	10	0.090325	0.0008685	0.008685	1
hsa-miR-1976	PPP1CC	1	0.000189126	35	35	0.05705	0.000249	0.008715	1
hsa-miR-130b-3p	SOX4	1	0.000189126	4	4	0.172183	0.002185	0.00874	1
hsa-miR-200b-5p	MBNL1	0.999	30.3054	4	4	0.107135	0.002185	0.00874	1
hsa-miR-200c-5p	MBNL1	1	0.000189126	4	4	0.116036	0.002185	0.00874	1
hsa-miR-24-2-5p	MBNL1	1	0.000189126	4	4	0.116911	0.002185	0.00874	1
hsa-miR-545-3p	MBNL1	0.994	42.9842	4	4	0.076631	0.002185	0.00874	1
hsa-miR-4324	PLOD3	0.995	41.8528	5	5	0.005755	0.00175	0.00875	1
hsa-miR-452-5p	INSIG1	0.826	76.103	2	2	0.152912	0.004429	0.008858	1
hsa-miR-495	SENP6	0.973	53.614	2	2	0.088605	0.004429	0.008858	1
hsa-miR-106b-5p	SMAD7	0.917	65.0227	23	23	0.112363	0.0003854	0.008864	1
hsa-miR-218-1-3p	CSNK2A2	0.989	46.9549	5	5	0.060528	0.001775	0.008875	1
hsa-miR-374b-3p	MBNL1	1	0.000189126	4	4	0.0737	0.002239	0.008956	1
hsa-miR-624-3p	SFPQ	1	0.000189126	76	76	0.069943	0.0001179	0.00896	1
hsa-miR-9-3p	SMAD1	0.999	30.3054	17	17	0.174187	0.0005288	0.00899	1
hsa-miR-2355-5p	CDKN1B	0.999	30.3054	15	15	0.113128	0.0005995	0.008993	1
hsa-miR-18a-5p	ABCC5	1	0.000189126	7	7	0.213294	0.001285	0.008995	1
hsa-miR-320c	NONO	1	0.000189126	24	24	0.057271	0.0003755	0.009012	1
hsa-miR-653	TM9SF2	1	0.000189126	3	3	0.090597	0.003006	0.009018	1
hsa-miR-1248	BRD2	1	0.000189126	15	15	0.110348	0.0006019	0.009029	1
hsa-miR-708-3p	PARL	1	0.000189126	5	5	0.074053	0.001817	0.009085	1
hsa-let-7g-3p	ATP1B1	1	0.000189126	20	20	0.102155	0.0004549	0.009098	1
hsa-miR-135b-5p	TCFL5	0.999	30.3054	17	17	0.157871	0.0005362	0.009115	1
hsa-miR-454-3p	AFF1	1	0.000189126	3	3	0.13218	0.003046	0.009138	1
hsa-miR-92a-1-5p	SUZ12	0.921	64.4653	52	52	0.111699	0.0001759	0.009147	1
hsa-miR-539-5p	STK39	1	0.000189126	32	32	0.065951	0.0002859	0.009149	1
hsa-miR-548x-3p	MBNL1	0.992	44.957	4	4	0.044275	0.002289	0.009156	1
hsa-miR-181d	CALM1	0.967	55.6329	12	12	0.066918	0.0007631	0.009157	1
hsa-miR-3613-3p	SGK1	0.976	52.641	6	6	0.07076	0.001527	0.009162	1
hsa-miR-548l	CD24	0.834	74.8807	30	30	0.089228	0.0003061	0.009183	1
hsa-miR-1271-5p	EIF4A2	1	0.000189126	32	32	0.058773	0.0002877	0.009206	1
hsa-let-7f-1-3p	AKAP9	0.998	35.422	26	26	0.068679	0.0003543	0.009212	1
hsa-miR-371a-3p	NR1D2	0.997	38.6214	3	3	0.065184	0.003076	0.009228	1
hsa-miR-205-3p	AKAP9	0.991	45.6945	26	26	0.080429	0.000355	0.00923	1
hsa-miR-544a	RSU1	0.831	75.2145	3	3	0.055473	0.003083	0.009249	1
hsa-miR-186-5p	ESR1	0.902	67.4195	43	43	0.107749	0.0002153	0.009258	1
hsa-miR-34a-3p	KLF5	1	0.000189126	33	33	0.057857	0.0002806	0.00926	1
hsa-miR-556-3p	HSPD1	0.979	51.6176	14	14	0.076335	0.0006614	0.00926	1
hsa-miR-410	RAP1A	0.999	30.3054	10	10	0.099036	0.0009299	0.009299	1
hsa-miR-124-3p	ADO	0.77	80.312	21	21	0.09836	0.0004441	0.009326	1
hsa-miR-885-3p	FYN	0.537	97.2626	10	10	0.083584	0.0009341	0.009341	1
hsa-let-7c	TGDS	1	0.000189126	3	3	0.074975	0.003115	0.009345	1
hsa-miR-195-5p	FSD1	0.998	35.422	10	10	0.119261	0.000936	0.00936	1
hsa-miR-498	THAP11	1	0.000189126	10	10	0.048346	0.000936	0.00936	1
hsa-miR-548b-5p	FOXJ3	0.988	47.4918	7	7	0.062061	0.00134	0.00938	1
hsa-miR-18b-5p	FBP1	0.998	35.422	19	19	0.113128	0.0004938	0.009382	1
hsa-miR-376c	TIAM1	0.989	46.9549	20	20	0.084164	0.0004695	0.00939	1
hsa-miR-452-3p	PPP1CC	0.999	30.3054	35	35	0.158049	0.0002695	0.009432	1
hsa-miR-144-5p	SNX2	0.984	49.3046	1	1	0.126231	0.009442	0.009442	1
hsa-miR-185-5p	TJP1	0.999	30.3054	1	1	0.123358	0.009442	0.009442	1
hsa-miR-450b-5p	TJP1	0.974	53.3216	1	1	0.113861	0.009442	0.009442	1
hsa-miR-518a-5p	PLXNA2	1	0.000189126	1	1	0.068471	0.009442	0.009442	1
hsa-miR-3653	CSK	1	0.000189126	7	7	0.075869	0.001349	0.009443	1
hsa-miR-1270	MBNL1	0.844	74.0067	4	4	0.098387	0.002362	0.009448	1
hsa-miR-221-3p	SPRED2	0.843	74.099	7	7	0.13754	0.001354	0.009478	1
hsa-miR-3650	BRD4	0.582	94.5025	24	24	0.068415	0.0003949	0.009478	1
hsa-miR-202-5p	PPP1R8	0.981	50.9165	14	14	0.051785	0.0006774	0.009484	1
hsa-miR-379-5p	AKAP9	0.996	40.3642	26	26	0.060814	0.0003649	0.009487	1
hsa-miR-140-3p	MBNL1	1	0.000189126	4	4	0.111571	0.002376	0.009504	1
hsa-let-7b-5p	SOX4	0.518	98.8944	4	4	0.094226	0.002381	0.009524	1
hsa-miR-3191-3p	SOX4	0.74	82.9422	4	4	0.076381	0.002381	0.009524	1
hsa-miR-3915	TOP1	0.997	38.6214	33	33	0.0058	0.0002896	0.009557	1
hsa-miR-3146	SEC24B	1	0.000189126	2	2	0.067862	0.004779	0.009558	1
hsa-miR-496	INSIG1	1	0.000189126	2	2	0.085006	0.004779	0.009558	1
hsa-miR-548d-3p	MTF2	1	0.000189126	57	57	0.081445	0.000168	0.009576	1
hsa-miR-501-5p	PPP1CC	1	0.000189126	35	35	0.089298	0.000274	0.00959	1
hsa-miR-222-5p	DDIT4	1	0.000189126	4	4	0.086966	0.002399	0.009596	1
hsa-miR-222-5p	MBNL1	1	0.000189126	4	4	0.086966	0.002399	0.009596	1
hsa-miR-548l	BTG3	1	0.000189126	3	3	0.084253	0.003209	0.009627	1
hsa-miR-365a-3p	CREB1	0.792	78.6967	11	11	0.076047	0.0008784	0.009662	1
hsa-miR-139-5p	KTN1	1	0.000189126	8	8	0.064205	0.001208	0.009664	1
hsa-miR-605	KDM5B	1	0.000189126	8	8	0.081614	0.001208	0.009664	1
hsa-let-7b-3p	SMNDC1	0.943	61.1064	3	3	0.070608	0.003226	0.009678	1
hsa-miR-363-3p	PAFAH1B1	0.621	91.328	12	11	0.06399	0.0008814	0.009695	1
hsa-miR-105-5p	SCAF8	0.983	50.1019	6	6	0.233333	0.001616	0.009696	1
[truncated: 66,872 more rows]

## Sheet: LINCS interactome (144H)
Perturbagen	Target	LogFC	Perturbagen Cutoff (|LogFC|)	Target Cutoff (|LogFC|)
[truncated: 44,630 more rows]

[truncated: 1 more sheets: Indirect regulation(LINCS 144H)]
