# Supplementary material for: Cupid: simultaneous reconstruction of microRNA-target and ceRNA networks
Source: HighWire-hosted journal article supplement (doi:10.1101/gr.178194.114), 2014-11-05
Supplement: Table_S11.xlsx [file Table_S11.xlsx]

## Sheet: Subtype
	We used 452 breast tumor samples from TCGA to identify regulators (miRNA/ceRNA) with subtype-specific expression and activity. Each sample's expression subtype was classified using the 50-gene PAM50 model. The deails can be found in the TCGA BRCA paper (PMID: 23000897). We tested all 4 subtypes for 1,189 miRNA and 4,887 ceRNA regulators and report on significant subtype-regulator pairs with an ad…
	Subtype	Number of patient samples		TCGA barcode	Subtype
	Basal-like	84		TCGA-A1-A0SK-01A-12	Basal-like
	HER2-enriched	52		TCGA-A1-A0SO-01A-22	Basal-like
	LuminalA	207		TCGA-A2-A04P-01A-31	Basal-like
	LuminalB	109		TCGA-A2-A04Q-01A-21	Basal-like
	Total	452		TCGA-A2-A04T-01A-21	Basal-like
				TCGA-A2-A04U-01A-11	Basal-like
				TCGA-A2-A0CM-01A-31	Basal-like
				TCGA-A2-A0D0-01A-11	Basal-like
				TCGA-A2-A0D2-01A-21	Basal-like
				TCGA-A2-A0ST-01A-12	Basal-like
				TCGA-A2-A0SX-01A-12	Basal-like
				TCGA-A2-A0T0-01A-22	Basal-like
				TCGA-A2-A0T2-01A-11	Basal-like
				TCGA-A2-A0YM-01A-11	Basal-like
				TCGA-A7-A0CE-01A-11	Basal-like
				TCGA-A7-A0DA-01A-31	Basal-like
				TCGA-A7-A13D-01A-13	Basal-like
				TCGA-A7-A13E-01A-11	Basal-like
				TCGA-A8-A07C-01A-11	Basal-like
				TCGA-A8-A07O-01A-11	Basal-like
				TCGA-A8-A07R-01A-21	Basal-like
				TCGA-A8-A07U-01A-11	Basal-like
				TCGA-A8-A08H-01A-21	Basal-like
				TCGA-A8-A08R-01A-11	Basal-like
				TCGA-AN-A04D-01A-21	Basal-like
				TCGA-AN-A0AL-01A-11	Basal-like
				TCGA-AN-A0FJ-01A-11	Basal-like
				TCGA-AN-A0FL-01A-11	Basal-like
				TCGA-AN-A0FX-01A-11	Basal-like
				TCGA-AN-A0G0-01A-11	Basal-like
				TCGA-AN-A0XU-01A-11	Basal-like
				TCGA-AO-A0J4-01A-11	Basal-like
				TCGA-AO-A0J6-01A-11	Basal-like
				TCGA-AO-A0JL-01A-11	Basal-like
				TCGA-AO-A124-01A-11	Basal-like
				TCGA-AO-A128-01A-11	Basal-like
				TCGA-AO-A129-01A-21	Basal-like
				TCGA-AO-A12F-01A-11	Basal-like
				TCGA-AQ-A04J-01A-02	Basal-like
				TCGA-AR-A0TP-01A-11	Basal-like
				TCGA-AR-A0TS-01A-11	Basal-like
				TCGA-AR-A0U1-01A-11	Basal-like
				TCGA-AR-A0U4-01A-11	Basal-like
				TCGA-AR-A1AH-01A-11	Basal-like
				TCGA-AR-A1AQ-01A-11	Basal-like
				TCGA-AR-A1AR-01A-31	Basal-like
				TCGA-AR-A1AY-01A-21	Basal-like
				TCGA-B6-A0I2-01A-11	Basal-like
				TCGA-B6-A0I6-01A-11	Basal-like
				TCGA-B6-A0IJ-01A-11	Basal-like
				TCGA-B6-A0IQ-01A-11	Basal-like
				TCGA-B6-A0RE-01A-11	Basal-like
				TCGA-B6-A0RT-01A-21	Basal-like
				TCGA-B6-A0RU-01A-11	Basal-like
				TCGA-B6-A0WX-01A-11	Basal-like
				TCGA-BH-A0AV-01A-31	Basal-like
				TCGA-BH-A0B3-01A-11	Basal-like
				TCGA-BH-A0BG-01A-11	Basal-like
				TCGA-BH-A0BL-01A-11	Basal-like
				TCGA-BH-A0BW-01A-11	Basal-like
				TCGA-BH-A0DL-01A-11	Basal-like
				TCGA-BH-A0E0-01A-11	Basal-like
				TCGA-BH-A0E6-01A-11	Basal-like
				TCGA-BH-A0RX-01A-21	Basal-like
				TCGA-BH-A0WA-01A-11	Basal-like
				TCGA-BH-A18G-01A-11	Basal-like
				TCGA-BH-A18K-01A-11	Basal-like
				TCGA-BH-A18Q-01A-12	Basal-like
				TCGA-BH-A18V-01A-11	Basal-like
				TCGA-BH-A1F0-01A-11	Basal-like
				TCGA-C8-A12K-01A-21	Basal-like
				TCGA-C8-A12V-01A-11	Basal-like
				TCGA-C8-A131-01A-11	Basal-like
				TCGA-C8-A134-01A-11	Basal-like
				TCGA-D8-A142-01A-11	Basal-like
				TCGA-D8-A147-01A-11	Basal-like
				TCGA-E2-A14N-01A-31	Basal-like
				TCGA-E2-A14R-01A-11	Basal-like
				TCGA-E2-A14X-01A-11	Basal-like
				TCGA-E2-A14Y-01A-21	Basal-like
				TCGA-E2-A150-01A-11	Basal-like
				TCGA-E2-A158-01A-11	Basal-like
				TCGA-E2-A159-01A-11	Basal-like
				TCGA-E2-A1B5-01A-21	Basal-like
				TCGA-A2-A04W-01A-31	HER2-enriched
				TCGA-A2-A04X-01A-21	HER2-enriched
				TCGA-A2-A0CL-01A-11	HER2-enriched
				TCGA-A2-A0D1-01A-11	HER2-enriched
				TCGA-A2-A0EQ-01A-11	HER2-enriched
				TCGA-A2-A0T1-01A-21	HER2-enriched
				TCGA-A8-A075-01A-11	HER2-enriched
				TCGA-A8-A076-01A-21	HER2-enriched
				TCGA-A8-A07B-01A-11	HER2-enriched
				TCGA-A8-A081-01A-11	HER2-enriched
				TCGA-A8-A08B-01A-11	HER2-enriched
				TCGA-A8-A08J-01A-11	HER2-enriched
				TCGA-A8-A08L-01A-11	HER2-enriched
				TCGA-A8-A08X-01A-21	HER2-enriched
				TCGA-A8-A092-01A-11	HER2-enriched
				TCGA-A8-A094-01A-11	HER2-enriched
				TCGA-A8-A09G-01A-21	HER2-enriched
				TCGA-A8-A09X-01A-11	HER2-enriched
				TCGA-A8-A0A7-01A-11	HER2-enriched
				TCGA-AN-A04C-01A-21	HER2-enriched
				TCGA-AN-A0FV-01A-11	HER2-enriched
				TCGA-AO-A03L-01A-41	HER2-enriched
				TCGA-AO-A03N-01B-11	HER2-enriched
				TCGA-AO-A0J2-01A-11	HER2-enriched
				TCGA-AO-A0JE-01A-11	HER2-enriched
				TCGA-AO-A12D-01A-11	HER2-enriched
				TCGA-AR-A0TX-01A-11	HER2-enriched
				TCGA-B6-A0I9-01A-11	HER2-enriched
				TCGA-B6-A0IK-01A-12	HER2-enriched
				TCGA-B6-A0RH-01A-21	HER2-enriched
				TCGA-B6-A0RS-01A-11	HER2-enriched
				TCGA-BH-A0AW-01A-11	HER2-enriched
				TCGA-BH-A0B7-01A-12	HER2-enriched
				TCGA-BH-A0EE-01A-11	HER2-enriched
				TCGA-BH-A0HY-01A-11	HER2-enriched
				TCGA-BH-A18P-01A-11	HER2-enriched
				TCGA-BH-A18R-01A-11	HER2-enriched
				TCGA-BH-A1EV-01A-11	HER2-enriched
				TCGA-C8-A12L-01A-11	HER2-enriched
				TCGA-C8-A12P-01A-11	HER2-enriched
				TCGA-C8-A12Q-01A-11	HER2-enriched
				TCGA-C8-A12T-01A-11	HER2-enriched
				TCGA-C8-A12Z-01A-11	HER2-enriched
				TCGA-C8-A130-01A-31	HER2-enriched
				TCGA-C8-A135-01A-11	HER2-enriched
				TCGA-C8-A138-01A-11	HER2-enriched
				TCGA-C8-A1HF-01A-11	HER2-enriched
				TCGA-D8-A13Z-01A-11	HER2-enriched
				TCGA-E2-A14P-01A-31	HER2-enriched
				TCGA-E2-A14V-01A-11	HER2-enriched
				TCGA-E2-A152-01A-11	HER2-enriched
				TCGA-E2-A1B0-01A-11	HER2-enriched
				TCGA-A1-A0SD-01A-11	LuminalA
				TCGA-A1-A0SE-01A-11	LuminalA
				TCGA-A1-A0SH-01A-11	LuminalA
				TCGA-A1-A0SJ-01A-11	LuminalA
				TCGA-A2-A04N-01A-11	LuminalA
				TCGA-A2-A04V-01A-21	LuminalA
				TCGA-A2-A04Y-01A-21	LuminalA
				TCGA-A2-A0CP-01A-11	LuminalA
				TCGA-A2-A0CQ-01A-21	LuminalA
				TCGA-A2-A0CS-01A-11	LuminalA
				TCGA-A2-A0CU-01A-12	LuminalA
				TCGA-A2-A0CV-01A-31	LuminalA
				TCGA-A2-A0CZ-01A-11	LuminalA
				TCGA-A2-A0D3-01A-11	LuminalA
				TCGA-A2-A0EM-01A-11	LuminalA
				TCGA-A2-A0EN-01A-13	LuminalA
				TCGA-A2-A0EO-01A-11	LuminalA
				TCGA-A2-A0ES-01A-11	LuminalA
				TCGA-A2-A0ET-01A-31	LuminalA
				TCGA-A2-A0EU-01A-22	LuminalA
				TCGA-A2-A0EV-01A-11	LuminalA
				TCGA-A2-A0EW-01A-21	LuminalA
				TCGA-A2-A0EX-01A-21	LuminalA
				TCGA-A2-A0SU-01A-11	LuminalA
				TCGA-A2-A0SY-01A-31	LuminalA
				TCGA-A2-A0T5-01A-21	LuminalA
				TCGA-A2-A0T6-01A-11	LuminalA
				TCGA-A2-A0T7-01A-21	LuminalA
				TCGA-A2-A0YC-01A-11	LuminalA
				TCGA-A2-A0YD-01A-11	LuminalA
				TCGA-A2-A0YF-01A-21	LuminalA
				TCGA-A2-A0YI-01A-31	LuminalA
				TCGA-A2-A0YL-01A-21	LuminalA
				TCGA-A7-A0CD-01A-11	LuminalA
				TCGA-A7-A0CH-01A-21	LuminalA
				TCGA-A7-A0D9-01A-31	LuminalA
				TCGA-A7-A0DB-01A-11	LuminalA
				TCGA-A8-A06P-01A-11	LuminalA
				TCGA-A8-A06T-01A-11	LuminalA
				TCGA-A8-A06Y-01A-21	LuminalA
				TCGA-A8-A07E-01A-11	LuminalA
				TCGA-A8-A07F-01A-11	LuminalA
				TCGA-A8-A07G-01A-11	LuminalA
				TCGA-A8-A07P-01A-11	LuminalA
				TCGA-A8-A086-01A-11	LuminalA
				TCGA-A8-A08O-01A-21	LuminalA
				TCGA-A8-A08T-01A-21	LuminalA
				TCGA-A8-A090-01A-11	LuminalA
				TCGA-A8-A091-01A-11	LuminalA
				TCGA-A8-A093-01A-11	LuminalA
				TCGA-A8-A09A-01A-11	LuminalA
				TCGA-A8-A09B-01A-11	LuminalA
				TCGA-A8-A0A1-01A-11	LuminalA
				TCGA-A8-A0A2-01A-11	LuminalA
				TCGA-A8-A0A4-01A-11	LuminalA
				TCGA-A8-A0A6-01A-12	LuminalA
				TCGA-A8-A0AD-01A-11	LuminalA
				TCGA-AN-A046-01A-21	LuminalA
				TCGA-AN-A04A-01A-21	LuminalA
				TCGA-AN-A0FD-01A-11	LuminalA
				TCGA-AN-A0FN-01A-11	LuminalA
				TCGA-AN-A0FS-01A-11	LuminalA
				TCGA-AN-A0FT-01A-11	LuminalA
				TCGA-AN-A0FW-01A-11	LuminalA
				TCGA-AN-A0FZ-01A-11	LuminalA
				TCGA-AN-A0XL-01A-11	LuminalA
				TCGA-AN-A0XN-01A-21	LuminalA
				TCGA-AN-A0XO-01A-11	LuminalA
				TCGA-AN-A0XP-01A-11	LuminalA
				TCGA-AN-A0XS-01A-22	LuminalA
				TCGA-AN-A0XT-01A-11	LuminalA
				TCGA-AN-A0XV-01A-11	LuminalA
				TCGA-AO-A03M-01B-11	LuminalA
				TCGA-AO-A03V-01A-11	LuminalA
				TCGA-AO-A0J8-01A-21	LuminalA
				TCGA-AO-A0J9-01A-11	LuminalA
				TCGA-AO-A0JA-01A-11	LuminalA
				TCGA-AO-A0JF-01A-11	LuminalA
				TCGA-AO-A0JG-01A-31	LuminalA
				TCGA-AO-A0JJ-01A-11	LuminalA
				TCGA-AO-A125-01A-11	LuminalA
				TCGA-AO-A126-01A-11	LuminalA
				TCGA-AO-A12A-01A-21	LuminalA
				TCGA-AO-A12C-01A-11	LuminalA
				TCGA-AO-A12E-01A-11	LuminalA
				TCGA-AO-A12G-01A-11	LuminalA
				TCGA-AO-A12H-01A-11	LuminalA
				TCGA-AQ-A04L-01B-21	LuminalA
				TCGA-AR-A0TR-01A-11	LuminalA
				TCGA-AR-A1AL-01A-21	LuminalA
				TCGA-AR-A1AN-01A-11	LuminalA
				TCGA-AR-A1AW-01A-21	LuminalA
				TCGA-AR-A1AX-01A-11	LuminalA
				TCGA-B6-A0I5-01A-11	LuminalA
				TCGA-B6-A0I8-01A-11	LuminalA
				TCGA-B6-A0IA-01A-11	LuminalA
				TCGA-B6-A0IG-01A-11	LuminalA
				TCGA-B6-A0IH-01A-11	LuminalA
				TCGA-B6-A0IN-01A-11	LuminalA
				TCGA-B6-A0IO-01A-11	LuminalA
				TCGA-B6-A0IP-01A-11	LuminalA
				TCGA-B6-A0RG-01A-11	LuminalA
				TCGA-B6-A0RI-01A-11	LuminalA
				TCGA-B6-A0RM-01A-11	LuminalA
				TCGA-B6-A0RN-01A-12	LuminalA
				TCGA-B6-A0RO-01A-22	LuminalA
				TCGA-B6-A0RP-01A-21	LuminalA
				TCGA-B6-A0RQ-01A-11	LuminalA
				TCGA-B6-A0RV-01A-11	LuminalA
				TCGA-B6-A0WS-01A-11	LuminalA
				TCGA-B6-A0WT-01A-11	LuminalA
				TCGA-B6-A0WY-01A-11	LuminalA
				TCGA-B6-A0WZ-01A-11	LuminalA
				TCGA-B6-A0X0-01A-21	LuminalA
				TCGA-B6-A0X4-01A-11	LuminalA
				TCGA-B6-A0X7-01A-11	LuminalA
				TCGA-BH-A0AZ-01A-21	LuminalA
				TCGA-BH-A0B0-01A-21	LuminalA
				TCGA-BH-A0B1-01A-12	LuminalA
				TCGA-BH-A0B8-01A-21	LuminalA
				TCGA-BH-A0BA-01A-11	LuminalA
				TCGA-BH-A0BC-01A-22	LuminalA
				TCGA-BH-A0BJ-01A-11	LuminalA
				TCGA-BH-A0BM-01A-11	LuminalA
				TCGA-BH-A0BO-01A-23	LuminalA
				TCGA-BH-A0BP-01A-11	LuminalA
				TCGA-BH-A0BQ-01A-21	LuminalA
				TCGA-BH-A0BR-01A-21	LuminalA
				TCGA-BH-A0BS-01A-11	LuminalA
				TCGA-BH-A0BT-01A-11	LuminalA
				TCGA-BH-A0BV-01A-11	LuminalA
				TCGA-BH-A0C1-01B-11	LuminalA
				TCGA-BH-A0DE-01A-11	LuminalA
				TCGA-BH-A0DG-01A-21	LuminalA
				TCGA-BH-A0DH-01A-11	LuminalA
				TCGA-BH-A0DI-01A-21	LuminalA
				TCGA-BH-A0DK-01A-21	LuminalA
				TCGA-BH-A0DO-01B-11	LuminalA
				TCGA-BH-A0DP-01A-21	LuminalA
				TCGA-BH-A0DQ-01A-11	LuminalA
				TCGA-BH-A0DS-01A-11	LuminalA
				TCGA-BH-A0DT-01A-21	LuminalA
				TCGA-BH-A0DX-01A-11	LuminalA
				TCGA-BH-A0E1-01A-11	LuminalA
				TCGA-BH-A0E7-01A-11	LuminalA
				TCGA-BH-A0E9-01B-11	LuminalA
				TCGA-BH-A0EA-01A-11	LuminalA
				TCGA-BH-A0EI-01A-11	LuminalA
				TCGA-BH-A0GY-01A-11	LuminalA
				TCGA-BH-A0GZ-01A-11	LuminalA
				TCGA-BH-A0H3-01A-11	LuminalA
				TCGA-BH-A0H5-01A-21	LuminalA
				TCGA-BH-A0H6-01A-21	LuminalA
				TCGA-BH-A0H7-01A-13	LuminalA
				TCGA-BH-A0H9-01A-11	LuminalA
				TCGA-BH-A0HA-01A-11	LuminalA
				TCGA-BH-A0HB-01A-11	LuminalA
				TCGA-BH-A0HF-01A-11	LuminalA
				TCGA-BH-A0HI-01A-11	LuminalA
				TCGA-BH-A0HK-01A-11	LuminalA
				TCGA-BH-A0HO-01A-11	LuminalA
				TCGA-BH-A0HP-01A-12	LuminalA
				TCGA-BH-A0HQ-01A-11	LuminalA
				TCGA-BH-A0HX-01A-21	LuminalA
				TCGA-BH-A0W4-01A-11	LuminalA
				TCGA-BH-A0W5-01A-11	LuminalA
				TCGA-BH-A0W7-01A-11	LuminalA
				TCGA-BH-A18H-01A-11	LuminalA
				TCGA-BH-A18I-01A-11	LuminalA
				TCGA-BH-A18M-01A-11	LuminalA
				TCGA-BH-A18N-01A-11	LuminalA
				TCGA-BH-A18S-01A-11	LuminalA
				TCGA-BH-A18T-01A-11	LuminalA
				TCGA-BH-A1EO-01A-11	LuminalA
				TCGA-BH-A1ET-01A-11	LuminalA
				TCGA-BH-A1EU-01A-11	LuminalA
				TCGA-C8-A12N-01A-11	LuminalA
				TCGA-C8-A12O-01A-11	LuminalA
				TCGA-C8-A12Y-01A-11	LuminalA
				TCGA-C8-A132-01A-31	LuminalA
				TCGA-C8-A133-01A-32	LuminalA
				TCGA-C8-A1HI-01A-11	LuminalA
				TCGA-D8-A141-01A-11	LuminalA
				TCGA-D8-A145-01A-11	LuminalA
				TCGA-E2-A105-01A-11	LuminalA
				TCGA-E2-A106-01A-11	LuminalA
				TCGA-E2-A10B-01A-11	LuminalA
				TCGA-E2-A10E-01A-21	LuminalA
				TCGA-E2-A10F-01A-11	LuminalA
				TCGA-E2-A14Q-01A-11	LuminalA
				TCGA-E2-A14T-01A-11	LuminalA
				TCGA-E2-A14Z-01A-11	LuminalA
				TCGA-E2-A153-01A-12	LuminalA
				TCGA-E2-A154-01A-11	LuminalA
				TCGA-E2-A15C-01A-31	LuminalA
				TCGA-E2-A15D-01A-11	LuminalA
				TCGA-E2-A15E-06A-11	LuminalA
				TCGA-E2-A15G-01A-11	LuminalA
				TCGA-E2-A15H-01A-11	LuminalA
				TCGA-E2-A15I-01A-21	LuminalA
				TCGA-E2-A15J-01A-11	LuminalA
				TCGA-E2-A15O-01A-11	LuminalA
				TCGA-E2-A15P-01A-11	LuminalA
				TCGA-E2-A15R-01A-11	LuminalA
				TCGA-E2-A1B1-01A-21	LuminalA
				TCGA-E2-A1B4-01A-11	LuminalA
				TCGA-E2-A1B6-01A-31	LuminalA
				TCGA-A1-A0SM-01A-11	LuminalB
				TCGA-A2-A04R-01A-41	LuminalB
				TCGA-A2-A0CT-01A-31	LuminalB
				TCGA-A2-A0D4-01A-11	LuminalB
				TCGA-A2-A0ER-01A-21	LuminalB
				TCGA-A2-A0EY-01A-11	LuminalB
				TCGA-A2-A0SV-01A-11	LuminalB
				TCGA-A2-A0SW-01A-11	LuminalB
				TCGA-A2-A0T3-01A-21	LuminalB
				TCGA-A2-A0T4-01A-31	LuminalB
				TCGA-A2-A0YG-01A-21	LuminalB
				TCGA-A2-A0YH-01A-11	LuminalB
				TCGA-A7-A0CJ-01A-21	LuminalB
				TCGA-A7-A13F-01A-11	LuminalB
				TCGA-A8-A06N-01A-11	LuminalB
				TCGA-A8-A06O-01A-11	LuminalB
				TCGA-A8-A06Q-01A-11	LuminalB
				TCGA-A8-A06Z-01A-11	LuminalB
				TCGA-A8-A079-01A-21	LuminalB
				TCGA-A8-A07L-01A-11	LuminalB
				TCGA-A8-A07S-01A-11	LuminalB
				TCGA-A8-A07W-01A-11	LuminalB
				TCGA-A8-A082-01A-11	LuminalB
				TCGA-A8-A085-01A-11	LuminalB
				TCGA-A8-A08I-01A-11	LuminalB
				TCGA-A8-A095-01A-11	LuminalB
				TCGA-A8-A097-01A-11	LuminalB
				TCGA-A8-A09C-01A-11	LuminalB
				TCGA-A8-A09D-01A-11	LuminalB
				TCGA-A8-A09I-01A-22	LuminalB
				TCGA-A8-A09N-01A-11	LuminalB
				TCGA-A8-A09Q-01A-11	LuminalB
				TCGA-A8-A09R-01A-11	LuminalB
				TCGA-A8-A0A9-01A-11	LuminalB
				TCGA-A8-A0AB-01A-11	LuminalB
				TCGA-AN-A041-01A-11	LuminalB
				TCGA-AN-A049-01A-21	LuminalB
				TCGA-AN-A0AK-01A-21	LuminalB
				TCGA-AN-A0AM-01A-11	LuminalB
				TCGA-AN-A0FF-01A-11	LuminalB
				TCGA-AN-A0FK-01A-11	LuminalB
				TCGA-AN-A0FY-01A-11	LuminalB
				TCGA-AN-A0XR-01A-11	LuminalB
				TCGA-AN-A0XW-01A-11	LuminalB
				TCGA-AO-A03O-01A-11	LuminalB
				TCGA-AO-A0J3-01A-11	LuminalB
				TCGA-AO-A0J7-01A-11	LuminalB
				TCGA-AO-A0JC-01A-11	LuminalB
				TCGA-AO-A0JD-01A-11	LuminalB
				TCGA-AO-A0JI-01A-21	LuminalB
				TCGA-AO-A0JM-01A-21	LuminalB
				TCGA-AO-A12B-01A-11	LuminalB
				TCGA-AQ-A04H-01B-11	LuminalB
				TCGA-AR-A0TQ-01A-11	LuminalB
				TCGA-AR-A0TT-01A-31	LuminalB
				TCGA-AR-A0TV-01A-21	LuminalB
				TCGA-AR-A0TY-01A-12	LuminalB
				TCGA-AR-A0TZ-01A-12	LuminalB
				TCGA-AR-A0U2-01A-11	LuminalB
				TCGA-AR-A0U3-01A-11	LuminalB
				TCGA-AR-A1AV-01A-21	LuminalB
				TCGA-B6-A0IB-01A-11	LuminalB
				TCGA-B6-A0IC-01A-11	LuminalB
				TCGA-B6-A0IM-01A-11	LuminalB
				TCGA-B6-A0RL-01A-11	LuminalB
				TCGA-B6-A0WV-01A-11	LuminalB
				TCGA-B6-A0WW-01A-11	LuminalB
				TCGA-B6-A0X5-01A-21	LuminalB
				TCGA-BH-A0AU-01A-11	LuminalB
				TCGA-BH-A0AY-01A-21	LuminalB
				TCGA-BH-A0B5-01A-11	LuminalB
				TCGA-BH-A0BD-01A-11	LuminalB
				TCGA-BH-A0BF-01A-21	LuminalB
				TCGA-BH-A0BZ-01A-31	LuminalB
				TCGA-BH-A0C0-01A-21	LuminalB
				TCGA-BH-A0C3-01A-21	LuminalB
				TCGA-BH-A0C7-01B-11	LuminalB
				TCGA-BH-A0DD-01A-31	LuminalB
				TCGA-BH-A0H0-01A-11	LuminalB
				TCGA-BH-A0HU-01A-11	LuminalB
				TCGA-BH-A0HW-01A-11	LuminalB
				TCGA-BH-A0W3-01A-11	LuminalB
				TCGA-BH-A18F-01A-11	LuminalB
				TCGA-BH-A18J-01A-11	LuminalB
				TCGA-BH-A18L-01A-32	LuminalB
				TCGA-BH-A18U-01A-21	LuminalB
				TCGA-BH-A1EW-01A-11	LuminalB
				TCGA-C8-A12M-01A-11	LuminalB
				TCGA-C8-A12U-01A-11	LuminalB
				TCGA-C8-A12W-01A-11	LuminalB
				TCGA-C8-A1HG-01A-11	LuminalB
				TCGA-C8-A1HL-01A-11	LuminalB
				TCGA-C8-A1HM-01A-12	LuminalB
				TCGA-C8-A1HN-01A-11	LuminalB
				TCGA-D8-A13Y-01A-11	LuminalB
				TCGA-D8-A140-01A-11	LuminalB
				TCGA-E2-A109-01A-11	LuminalB
				TCGA-E2-A10A-01A-21	LuminalB
				TCGA-E2-A10C-01A-21	LuminalB
				TCGA-E2-A14O-01A-31	LuminalB
				TCGA-E2-A14S-01A-11	LuminalB
				TCGA-E2-A14W-01A-11	LuminalB
				TCGA-E2-A155-01A-11	LuminalB
				TCGA-E2-A15A-01A-11	LuminalB
				TCGA-E2-A15A-06A-11	LuminalB
				TCGA-E2-A15K-01A-11	LuminalB
				TCGA-E2-A15K-06A-11	LuminalB
				TCGA-E2-A15M-01A-11	LuminalB
				TCGA-E2-A15S-01A-11	LuminalB

## Sheet: Regulator
miRNA	ceRNA
hsa-let-7a-2-3p	AAK1
hsa-let-7a-3p	ABCA1
hsa-let-7a-5p	ABCB10
hsa-let-7b-3p	ABCC10
hsa-let-7b-5p	ABCC4
hsa-let-7c	ABCC5
hsa-let-7d-3p	ABCD3
hsa-let-7d-5p	ABCE1
hsa-let-7e-3p	ABCF2
hsa-let-7e-5p	ABCF3
hsa-let-7f-1-3p	ABHD13
hsa-let-7f-2-3p	ABHD2
hsa-let-7f-5p	ABHD3
hsa-let-7g-3p	ABI1
hsa-let-7g-5p	ABI2
hsa-let-7i-3p	ABI3BP
hsa-let-7i-5p	ABL1
hsa-miR-1	ABL2
hsa-miR-100-3p	ABLIM3
hsa-miR-100-5p	ABTB2
hsa-miR-101-3p	ACACA
hsa-miR-101-5p	ACAP2
hsa-miR-103a-2-5p	ACBD3
hsa-miR-103a-3p	ACBD5
hsa-miR-103b	ACER2
hsa-miR-105-3p	ACIN1
hsa-miR-105-5p	ACPL2
hsa-miR-106a-3p	ACSL1
hsa-miR-106a-5p	ACSL3
hsa-miR-106b-3p	ACSL4
hsa-miR-106b-5p	ACSL5
hsa-miR-107	ACSL6
hsa-miR-10a-3p	ACTA2
hsa-miR-10a-5p	ACTB
hsa-miR-10b-3p	ACTL6A
hsa-miR-10b-5p	ACTN1
hsa-miR-1178	ACTN4
hsa-miR-1179	ACTR1A
hsa-miR-1180	ACTR2
hsa-miR-1182	ACTR3
hsa-miR-1183	ACTR3B
hsa-miR-1184	ACVR1
hsa-miR-1185-5p	ACVR1B
hsa-miR-1193	ACVR1C
hsa-miR-1197	ACVR2A
hsa-miR-1200	ACVR2B
hsa-miR-1202	ADAM10
hsa-miR-1203	ADAM12
hsa-miR-1204	ADAM17
hsa-miR-1205	ADAM19
hsa-miR-1206	ADAM22
hsa-miR-1207-3p	ADAM23
hsa-miR-1207-5p	ADAM9
hsa-miR-1208	ADAMTS10
hsa-miR-122-3p	ADAMTS15
hsa-miR-122-5p	ADAMTS18
hsa-miR-1224-3p	ADAMTS19
hsa-miR-1224-5p	ADAMTS3
hsa-miR-1225-3p	ADAMTS5
hsa-miR-1225-5p	ADAMTS6
hsa-miR-1226-3p	ADAMTS7
hsa-miR-1226-5p	ADAMTS9
hsa-miR-1227	ADAMTSL1
hsa-miR-1228-3p	ADAMTSL3
hsa-miR-1229	ADCY2
hsa-miR-1231	ADCY3
hsa-miR-1233	ADCY6
hsa-miR-1234	ADCY9
hsa-miR-1236	ADCYAP1
hsa-miR-1237	ADD1
hsa-miR-1238	ADD3
hsa-miR-124-3p	ADIPOR1
hsa-miR-124-5p	ADIPOR2
hsa-miR-1243	ADK
hsa-miR-1244	ADM
hsa-miR-1245a	ADNP
hsa-miR-1246	ADO
hsa-miR-1247-5p	ADORA2A
hsa-miR-1248	ADRA1D
hsa-miR-1249	ADRA2A
hsa-miR-1250	ADRB1
hsa-miR-1251	ADRB2
hsa-miR-1252	ADRBK1
hsa-miR-1253	ADSS
hsa-miR-1254	AEBP2
hsa-miR-1255a	AFAP1L2
hsa-miR-1255b-5p	AFF1
hsa-miR-1256	AFF2
hsa-miR-1257	AFF3
hsa-miR-1258	AFF4
hsa-miR-125a-3p	AFG3L2
hsa-miR-125a-5p	AFTPH
hsa-miR-125b-1-3p	AGAP1
hsa-miR-125b-2-3p	AGAP2
hsa-miR-125b-5p	AGFG1
hsa-miR-126-3p	AGGF1
hsa-miR-126-5p	AGPAT9
hsa-miR-1260a	AGPS
hsa-miR-1260b	AGTPBP1
hsa-miR-1261	AHCTF1
hsa-miR-1262	AHCYL1
hsa-miR-1263	AHCYL2
hsa-miR-1264	AHNAK
hsa-miR-1265	AHR
hsa-miR-1266	AJUBA
hsa-miR-1267	AKAP1
hsa-miR-1269a	AKAP11
hsa-miR-127-3p	AKAP12
hsa-miR-127-5p	AKAP13
hsa-miR-1270	AKAP5
hsa-miR-1271-5p	AKAP6
hsa-miR-1272	AKAP7
hsa-miR-1273a	AKAP9
hsa-miR-1273c	AKIRIN1
hsa-miR-1273d	AKIRIN2
hsa-miR-1273e	AKNA
hsa-miR-1275	AKT3
hsa-miR-1276	AKTIP
hsa-miR-1277-3p	ALCAM
hsa-miR-1278	ALDH1A3
hsa-miR-1279	ALG10
hsa-miR-128	ALG9
hsa-miR-1280	ALS2
hsa-miR-1282	ALS2CR8
hsa-miR-1283	ALX4
hsa-miR-1284	AMBRA1
hsa-miR-1285-3p	AMD1
hsa-miR-1286	AMFR
hsa-miR-1287	AMMECR1
hsa-miR-1288	AMMECR1L
hsa-miR-1289	AMOTL2
hsa-miR-129-1-3p	AMPH
hsa-miR-129-2-3p	AMT
hsa-miR-129-5p	ANAPC1
hsa-miR-1290	ANGEL1
hsa-miR-1291	ANGPTL2
hsa-miR-1292	ANK1
hsa-miR-1293	ANK2
hsa-miR-1294	ANK3
hsa-miR-1295a	ANKFY1
hsa-miR-1296	ANKH
hsa-miR-1297	ANKHD1
hsa-miR-1298	ANKIB1
hsa-miR-1299	ANKRA2
hsa-miR-1301	ANKRD1
hsa-miR-1302	ANKRD10
hsa-miR-1303	ANKRD11
hsa-miR-1304-5p	ANKRD12
hsa-miR-1305	ANKRD13C
hsa-miR-1306-3p	ANKRD17
hsa-miR-1307-3p	ANKRD28
hsa-miR-130a-3p	ANKRD29
hsa-miR-130a-5p	ANKRD40
hsa-miR-130b-3p	ANKRD44
hsa-miR-130b-5p	ANKRD46
hsa-miR-132-3p	ANKRD49
hsa-miR-132-5p	ANKRD50
hsa-miR-1321	ANKRD52
hsa-miR-1322	ANKS1A
hsa-miR-1323	ANKS1B
hsa-miR-1324	ANLN
hsa-miR-133a	ANO1
hsa-miR-133b	ANO3
hsa-miR-134	ANO4
hsa-miR-135a-3p	ANO6
hsa-miR-135a-5p	ANO8
hsa-miR-135b-3p	ANP32A
hsa-miR-135b-5p	ANP32B
hsa-miR-136-3p	ANP32E
hsa-miR-136-5p	ANTXR1
hsa-miR-137	ANTXR2
hsa-miR-138-1-3p	AP1AR
hsa-miR-138-2-3p	AP1G1
hsa-miR-138-5p	AP1S1
hsa-miR-139-3p	AP2B1
hsa-miR-139-5p	AP3B1
hsa-miR-140-3p	AP3D1
hsa-miR-140-5p	AP3M1
hsa-miR-141-3p	AP3S1
hsa-miR-141-5p	AP4E1
hsa-miR-142-3p	APAF1
hsa-miR-142-5p	APBA1
hsa-miR-143-3p	APBB2
hsa-miR-143-5p	APBB3
hsa-miR-144-3p	APC
hsa-miR-144-5p	APCDD1
hsa-miR-145-3p	API5
hsa-miR-145-5p	APP
hsa-miR-1468	APPBP2
hsa-miR-146a-3p	APPL1
hsa-miR-146a-5p	APPL2
hsa-miR-146b-3p	AQP11
hsa-miR-146b-5p	AR
hsa-miR-1470	ARAP2
hsa-miR-147a	ARCN1
hsa-miR-147b	ARF3
hsa-miR-148a-3p	ARF4
hsa-miR-148a-5p	ARF6
hsa-miR-148b-3p	ARFGEF1
hsa-miR-148b-5p	ARFGEF2
hsa-miR-149-3p	ARFIP1
hsa-miR-149-5p	ARG2
hsa-miR-150-3p	ARGLU1
hsa-miR-150-5p	ARHGAP1
hsa-miR-151a-3p	ARHGAP11A
hsa-miR-151a-5p	ARHGAP12
hsa-miR-152	ARHGAP15
hsa-miR-153	ARHGAP18
hsa-miR-1537	ARHGAP19
hsa-miR-1539	ARHGAP20
hsa-miR-154-3p	ARHGAP21
hsa-miR-154-5p	ARHGAP23
hsa-miR-155-3p	ARHGAP24
hsa-miR-155-5p	ARHGAP26
hsa-miR-15a-3p	ARHGAP28
hsa-miR-15a-5p	ARHGAP29
hsa-miR-15b-3p	ARHGAP31
hsa-miR-15b-5p	ARHGAP32
hsa-miR-16-1-3p	ARHGAP35
hsa-miR-16-2-3p	ARHGAP5
hsa-miR-16-5p	ARHGAP6
hsa-miR-17-3p	ARHGEF10
hsa-miR-17-5p	ARHGEF11
hsa-miR-181a-2-3p	ARHGEF12
hsa-miR-181a-3p	ARHGEF15
hsa-miR-181a-5p	ARHGEF17
hsa-miR-181b-5p	ARHGEF18
hsa-miR-181c-3p	ARHGEF3
hsa-miR-181c-5p	ARHGEF4
hsa-miR-181d	ARHGEF7
hsa-miR-182-3p	ARHGEF9
hsa-miR-182-5p	ARID1A
hsa-miR-1825	ARID1B
hsa-miR-1827	ARID2
hsa-miR-183-3p	ARID3A
hsa-miR-183-5p	ARID3B
hsa-miR-184	ARID4A
hsa-miR-185-3p	ARID4B
hsa-miR-185-5p	ARID5B
hsa-miR-186-3p	ARIH1
hsa-miR-186-5p	ARL1
hsa-miR-187-3p	ARL13B
hsa-miR-187-5p	ARL15
hsa-miR-188-3p	ARL3
hsa-miR-188-5p	ARL4A
hsa-miR-18a-3p	ARL4C
hsa-miR-18a-5p	ARL5A
hsa-miR-18b-3p	ARL5B
hsa-miR-18b-5p	ARL6IP1
hsa-miR-1908	ARL6IP6
hsa-miR-1909-3p	ARL8B
hsa-miR-1909-5p	ARMC1
hsa-miR-190a	ARMC5
hsa-miR-190b	ARMC8
hsa-miR-191-3p	ARMCX2
hsa-miR-191-5p	ARNT
hsa-miR-1910	ARNTL
hsa-miR-1911-3p	ARPC2
hsa-miR-1911-5p	ARPC5
hsa-miR-1912	ARPP19
hsa-miR-1913	ARRDC3
hsa-miR-1914-3p	ARRDC4
hsa-miR-1914-5p	ARSB
hsa-miR-1915-3p	ARSJ
hsa-miR-1915-5p	ART3
hsa-miR-192-3p	ARX
hsa-miR-192-5p	ASAP1
hsa-miR-193a-3p	ASAP2
hsa-miR-193a-5p	ASB14
hsa-miR-193b-3p	ASB7
hsa-miR-193b-5p	ASCC3
hsa-miR-194-3p	ASCL1
hsa-miR-194-5p	ASF1A
hsa-miR-195-3p	ASH1L
hsa-miR-195-5p	ASIC1
hsa-miR-196a-3p	ASPH
hsa-miR-196a-5p	ASPN
hsa-miR-196b-3p	ASUN
hsa-miR-196b-5p	ASXL1
hsa-miR-197-3p	ASXL2
hsa-miR-1972	ATAD1
hsa-miR-1973	ATAD2
hsa-miR-1976	ATAD2B
hsa-miR-198	ATAD5
hsa-miR-199a-3p	ATF1
hsa-miR-199a-5p	ATF2
hsa-miR-199b-3p	ATF6B
hsa-miR-199b-5p	ATF7
hsa-miR-19a-3p	ATF7IP
hsa-miR-19a-5p	ATG14
hsa-miR-19b-1-5p	ATG16L1
hsa-miR-19b-2-5p	ATG2A
hsa-miR-19b-3p	ATG2B
hsa-miR-200a-3p	ATG5
hsa-miR-200a-5p	ATG7
hsa-miR-200b-3p	ATG9A
hsa-miR-200b-5p	ATL1
hsa-miR-200c-3p	ATL2
hsa-miR-200c-5p	ATL3
hsa-miR-202-3p	ATMIN
hsa-miR-202-5p	ATP10A
hsa-miR-203	ATP11A
hsa-miR-204-5p	ATP11B
hsa-miR-205-3p	ATP11C
hsa-miR-205-5p	ATP13A3
hsa-miR-2052	ATP1B1
hsa-miR-2053	ATP2A2
hsa-miR-2054	ATP2B1
hsa-miR-206	ATP2B2
hsa-miR-208a	ATP2B4
hsa-miR-208b	ATP2C1
hsa-miR-20a-3p	ATP6V0A2
hsa-miR-20a-5p	ATP6V0E1
hsa-miR-20b-3p	ATP6V1A
hsa-miR-20b-5p	ATP6V1B2
hsa-miR-21-3p	ATP7A
hsa-miR-21-5p	ATP8A1
hsa-miR-210	ATP8B1
hsa-miR-211-5p	ATP8B2
hsa-miR-2110	ATP8B4
hsa-miR-2113	ATPBD4
hsa-miR-2114-3p	ATRN
hsa-miR-2114-5p	ATRNL1
hsa-miR-2115-3p	ATRX
hsa-miR-2115-5p	ATXN1
hsa-miR-2116-3p	ATXN1L
hsa-miR-2116-5p	ATXN2
hsa-miR-2117	ATXN2L
hsa-miR-212-3p	ATXN3
hsa-miR-214-3p	ATXN7
hsa-miR-214-5p	ATXN7L1
hsa-miR-215	ATXN7L3
hsa-miR-216a	ATXN7L3B
hsa-miR-216b	AUH
hsa-miR-217	AURKB
hsa-miR-218-1-3p	AUTS2
hsa-miR-218-2-3p	AVL9
hsa-miR-218-5p	AXIN2
hsa-miR-219-1-3p	AXL
hsa-miR-219-2-3p	AZI2
hsa-miR-219-5p	AZIN1
hsa-miR-22-3p	B3GALT1
hsa-miR-22-5p	B3GALT2
hsa-miR-221-3p	B3GNT2
hsa-miR-221-5p	B3GNT5
hsa-miR-222-3p	B4GALT1
hsa-miR-222-5p	B4GALT3
hsa-miR-223-3p	B4GALT5
hsa-miR-223-5p	B4GALT6
hsa-miR-224-3p	BACE1
hsa-miR-224-5p	BACE2
hsa-miR-2276	BACH1
hsa-miR-2277-3p	BACH2
hsa-miR-2278	BAG4
hsa-miR-2355-3p	BAG5
hsa-miR-2355-5p	BAHD1
hsa-miR-23a-3p	BAI3
hsa-miR-23a-5p	BASP1
hsa-miR-23b-3p	BAZ1A
hsa-miR-23b-5p	BAZ1B
hsa-miR-23c	BAZ2A
hsa-miR-24-1-5p	BAZ2B
hsa-miR-24-2-5p	BBX
hsa-miR-24-3p	BCAR3
hsa-miR-25-3p	BCAS1
hsa-miR-25-5p	BCAT1
hsa-miR-26a-1-3p	BCL11A
hsa-miR-26a-2-3p	BCL11B
hsa-miR-26a-5p	BCL2
hsa-miR-26b-3p	BCL2L1
hsa-miR-26b-5p	BCL2L11
hsa-miR-27a-3p	BCL2L2
hsa-miR-27a-5p	BCL6
hsa-miR-27b-3p	BCL7A
hsa-miR-27b-5p	BCL9
hsa-miR-28-3p	BCL9L
hsa-miR-28-5p	BCLAF1
hsa-miR-2909	BCOR
hsa-miR-296-3p	BCORL1
hsa-miR-296-5p	BDNF
hsa-miR-297	BDP1
hsa-miR-298	BEAN1
hsa-miR-299-3p	BECN1
hsa-miR-299-5p	BEND3
hsa-miR-29a-3p	BEND4
hsa-miR-29a-5p	BEND6
hsa-miR-29b-1-5p	BEND7
hsa-miR-29b-2-5p	BET1
hsa-miR-29b-3p	BFAR
hsa-miR-29c-3p	BHLHE22
hsa-miR-29c-5p	BHLHE40
hsa-miR-300	BHLHE41
hsa-miR-301a-3p	BICC1
hsa-miR-301b	BICD1
hsa-miR-302a-3p	BICD2
hsa-miR-302a-5p	BIRC6
hsa-miR-302b-3p	BIVM
hsa-miR-302b-5p	BLCAP
hsa-miR-302c-3p	BLMH
hsa-miR-302c-5p	BMI1
hsa-miR-302d-3p	BMP1
hsa-miR-302d-5p	BMP2
hsa-miR-302e	BMP2K
hsa-miR-302f	BMP4
hsa-miR-3065-3p	BMP5
hsa-miR-3065-5p	BMP6
hsa-miR-3074-3p	BMPER
hsa-miR-30a-3p	BMPR1A
hsa-miR-30a-5p	BMPR1B
hsa-miR-30b-3p	BMPR2
hsa-miR-30b-5p	BNC1
hsa-miR-30c-1-3p	BNC2
hsa-miR-30c-2-3p	BNIP2
hsa-miR-30c-5p	BNIP3L
hsa-miR-30d-3p	BOC
hsa-miR-30d-5p	BOD1L1
hsa-miR-30e-3p	BPTF
hsa-miR-30e-5p	BRAP
hsa-miR-31-3p	BRD1
hsa-miR-31-5p	BRD3
hsa-miR-3115	BRD4
hsa-miR-3116	BRD7
hsa-miR-3117-3p	BRD8
hsa-miR-3118	BRMS1L
hsa-miR-3119	BRPF1
hsa-miR-3120-3p	BRPF3
hsa-miR-3121-3p	BRWD1
hsa-miR-3122	BRWD3
hsa-miR-3123	BSDC1
hsa-miR-3125	BSN
hsa-miR-3126-3p	BTAF1
hsa-miR-3126-5p	BTBD1
hsa-miR-3127-5p	BTBD10
hsa-miR-3128	BTBD11
hsa-miR-3129-5p	BTBD3
hsa-miR-3130-3p	BTBD7
hsa-miR-3130-5p	BTF3
hsa-miR-3132	BTF3L4
hsa-miR-3133	BTG2
hsa-miR-3134	BTG3
hsa-miR-3135a	BTLA
hsa-miR-3136-5p	BTRC
hsa-miR-3137	BUB3
hsa-miR-3138	BZRAP1
hsa-miR-3139	BZW1
hsa-miR-3140-3p	C10orf114
hsa-miR-3141	C10orf118
hsa-miR-3142	C10orf12
hsa-miR-3143	C10orf76
hsa-miR-3144-3p	C11orf30
hsa-miR-3144-5p	C11orf41
hsa-miR-3145-3p	C11orf42
hsa-miR-3146	C11orf49
hsa-miR-3147	C11orf57
hsa-miR-3148	C11orf58
hsa-miR-3149	C11orf75
hsa-miR-3150a-3p	C11orf82
hsa-miR-3150b-3p	C11orf84
hsa-miR-3151	C11orf87
hsa-miR-3152-3p	C11orf95
hsa-miR-3153	C12orf23
hsa-miR-3154	C12orf29
hsa-miR-3155a	C12orf51
hsa-miR-3156-5p	C12orf68
hsa-miR-3157-5p	C12orf76
hsa-miR-3158-3p	C14orf101
hsa-miR-3159	C14orf102
hsa-miR-3160-3p	C14orf129
hsa-miR-3161	C14orf135
hsa-miR-3162-5p	C14orf28
hsa-miR-3163	C14orf37
hsa-miR-3164	C15orf29
hsa-miR-3165	C15orf41
hsa-miR-3166	C15orf44
hsa-miR-3167	C16orf52
hsa-miR-3168	C16orf70
hsa-miR-3169	C16orf72
hsa-miR-3170	C16orf87
hsa-miR-3171	C17orf104
hsa-miR-3173-3p	C17orf39
hsa-miR-3174	C17orf59
hsa-miR-3175	C17orf85
hsa-miR-3176	C18orf1
hsa-miR-3177-3p	C18orf25
hsa-miR-3179	C18orf34
hsa-miR-3180	C18orf8
hsa-miR-3180-5p	C19orf43
hsa-miR-3181	C19orf6
hsa-miR-3182	C1GALT1
hsa-miR-3183	C1orf144
hsa-miR-3184-5p	C1orf173
hsa-miR-3185	C1orf21
hsa-miR-3186-5p	C1orf52
hsa-miR-3187-3p	C1orf56
hsa-miR-3188	C1orf63
hsa-miR-3189-3p	C1QBP
hsa-miR-3190-5p	C1S
hsa-miR-3191-3p	C20orf111
hsa-miR-3192	C20orf112
hsa-miR-3193	C20orf194
hsa-miR-3194-5p	C20orf20
hsa-miR-3196	C21orf91
hsa-miR-3198	C2orf42
hsa-miR-3199	C2orf44
hsa-miR-32-3p	C2orf47
hsa-miR-32-5p	C2orf69
hsa-miR-3200-3p	C3orf18
hsa-miR-3200-5p	C3orf38
hsa-miR-3201	C3orf58
hsa-miR-3202	C3orf70
hsa-miR-320a	C4orf32
hsa-miR-320b	C4orf34
hsa-miR-320c	C5orf15
hsa-miR-320d	C5orf24
hsa-miR-320e	C5orf30
hsa-miR-323a-3p	C5orf44
hsa-miR-323a-5p	C5orf51
hsa-miR-323b-3p	C5orf62
hsa-miR-323b-5p	C5orf63
hsa-miR-324-3p	C6orf106
hsa-miR-324-5p	C6orf120
hsa-miR-325	C6orf211
hsa-miR-326	C6orf228
hsa-miR-328	C6orf62
hsa-miR-329	C7orf43
hsa-miR-330-3p	C7orf60
hsa-miR-330-5p	C8orf34
hsa-miR-331-3p	C8orf4
hsa-miR-331-5p	C8orf58
hsa-miR-335-3p	C9orf100
hsa-miR-335-5p	C9orf3
hsa-miR-337-3p	C9orf69
hsa-miR-337-5p	C9orf72
hsa-miR-338-3p	CAAP1
hsa-miR-338-5p	CAB39
hsa-miR-339-3p	CACHD1
hsa-miR-339-5p	CACNA1A
hsa-miR-33a-3p	CACNA1C
hsa-miR-33a-5p	CACNA1D
hsa-miR-33b-3p	CACNA1E
hsa-miR-33b-5p	CACNA1H
hsa-miR-340-3p	CACNA2D1
hsa-miR-340-5p	CACNA2D2
hsa-miR-342-3p	CACNA2D3
hsa-miR-342-5p	CACNB1
hsa-miR-345-5p	CACNB2
hsa-miR-346	CACNB4
hsa-miR-34a-3p	CACUL1
hsa-miR-34a-5p	CADM1
hsa-miR-34b-3p	CADM2
hsa-miR-34b-5p	CALB2
hsa-miR-34c-3p	CALCR
hsa-miR-34c-5p	CALD1
hsa-miR-3605-5p	CALM1
hsa-miR-3606	CALM2
hsa-miR-3607-3p	CALM3
hsa-miR-3607-5p	CALML4
hsa-miR-3609	CALU
hsa-miR-361-3p	CAMK2A
hsa-miR-361-5p	CAMK2G
hsa-miR-3610	CAMK2N1
hsa-miR-3611	CAMKK2
hsa-miR-3612	CAMLG
hsa-miR-3613-3p	CAMSAP1
hsa-miR-3613-5p	CAMSAP2
hsa-miR-3614-3p	CAMTA1
hsa-miR-3614-5p	CAMTA2
hsa-miR-3615	CAND1
hsa-miR-3616-3p	CANX
hsa-miR-3616-5p	CAP1
hsa-miR-3617	CAPN6
hsa-miR-3618	CAPN7
hsa-miR-3619-5p	CAPRIN1
hsa-miR-362-3p	CAPRIN2
hsa-miR-362-5p	CAPZA1
hsa-miR-3620	CAPZA2
hsa-miR-3622a-3p	CARM1
hsa-miR-3622a-5p	CASC3
hsa-miR-3622b-3p	CASC4
hsa-miR-3622b-5p	CASD1
hsa-miR-363-3p	CASK
hsa-miR-363-5p	CASP3
hsa-miR-3646	CASP8AP2
hsa-miR-3649	CAST
hsa-miR-3650	CASZ1
hsa-miR-3651	CAV1
hsa-miR-3652	CAV2
hsa-miR-3653	CBFA2T2
hsa-miR-3654	CBFA2T3
hsa-miR-3655	CBFB
hsa-miR-3657	CBL
hsa-miR-3658	CBLB
hsa-miR-3659	CBLL1
hsa-miR-365a-3p	CBLN4
hsa-miR-365a-5p	CBX1
hsa-miR-3660	CBX3
hsa-miR-3661	CBX4
hsa-miR-3662	CBX5
hsa-miR-3663-3p	CBX7
hsa-miR-3663-5p	CC2D1A
hsa-miR-3664-5p	CCAR1
hsa-miR-3665	CCDC117
hsa-miR-3666	CCDC126
hsa-miR-3667-3p	CCDC148
hsa-miR-3667-5p	CCDC19
hsa-miR-3668	CCDC25
hsa-miR-3669	CCDC47
hsa-miR-367-3p	CCDC50
hsa-miR-367-5p	CCDC6
hsa-miR-3670	CCDC64
hsa-miR-3671	CCDC71L
hsa-miR-3672	CCDC82
hsa-miR-3673	CCDC85A
hsa-miR-3674	CCDC88A
hsa-miR-3675-3p	CCNA2
hsa-miR-3675-5p	CCNC
hsa-miR-3676-3p	CCND1
hsa-miR-3677-3p	CCND2
hsa-miR-3678-3p	CCNE1
hsa-miR-3678-5p	CCNE2
hsa-miR-3679-3p	CCNG1
hsa-miR-3679-5p	CCNG2
hsa-miR-3680-3p	CCNJ
hsa-miR-3680-5p	CCNJL
hsa-miR-3681-3p	CCNK
hsa-miR-3681-5p	CCNL1
hsa-miR-3682-3p	CCNL2
hsa-miR-3683	CCNT2
hsa-miR-3684	CCNY
hsa-miR-3685	CCNYL1
hsa-miR-3686	CCP110
hsa-miR-3687	CCPG1
hsa-miR-3688-3p	CCR7
hsa-miR-3689a-3p	CCSAP
hsa-miR-3689a-5p	CCT6A
hsa-miR-3689b-3p	CD163
hsa-miR-3689b-5p	CD164
hsa-miR-369-3p	CD200R1
hsa-miR-369-5p	CD2AP
hsa-miR-3690	CD34
hsa-miR-3691-5p	CD47
hsa-miR-3692-3p	CD69
hsa-miR-3692-5p	CDADC1
hsa-miR-370	CDC14A
hsa-miR-3713	CDC14B
hsa-miR-3714	CDC23
hsa-miR-371a-3p	CDC25A
hsa-miR-371a-5p	CDC25B
hsa-miR-372	CDC27
hsa-miR-373-3p	CDC34
hsa-miR-373-5p	CDC37L1
hsa-miR-374a-3p	CDC40
hsa-miR-374a-5p	CDC42
hsa-miR-374b-3p	CDC42BPA
hsa-miR-374b-5p	CDC42BPB
hsa-miR-374c-5p	CDC42SE1
hsa-miR-375	CDC42SE2
hsa-miR-376a-3p	CDC5L
hsa-miR-376a-5p	CDC73
hsa-miR-376b	CDCA4
hsa-miR-376c	CDCA7
hsa-miR-377-3p	CDCA8
hsa-miR-377-5p	CDH11
hsa-miR-378a-3p	CDH13
hsa-miR-378a-5p	CDH2
hsa-miR-378b	CDH22
hsa-miR-378c	CDH24
hsa-miR-379-3p	CDH4
hsa-miR-379-5p	CDH6
hsa-miR-380-3p	CDK1
hsa-miR-380-5p	CDK12
hsa-miR-381	CDK13
hsa-miR-382-5p	CDK14
hsa-miR-383	CDK17
hsa-miR-384	CDK19
hsa-miR-3907	CDK2
hsa-miR-3908	CDK2AP1
hsa-miR-3909	CDK5R1
hsa-miR-3910	CDK6
hsa-miR-3911	CDK8
hsa-miR-3912	CDKN1B
hsa-miR-3913-5p	CDKN1C
hsa-miR-3914	CDKN2AIP
hsa-miR-3915	CDO1
hsa-miR-3916	CDS1
hsa-miR-3917	CDS2
hsa-miR-3918	CDV3
hsa-miR-3919	CDYL
hsa-miR-3920	CDYL2
hsa-miR-3921	CEBPB
hsa-miR-3922-3p	CEBPZ
hsa-miR-3923	CECR2
hsa-miR-3924	CELF1
hsa-miR-3925-5p	CELF2
hsa-miR-3926	CELF4
hsa-miR-3927	CELF6
hsa-miR-3928	CELSR2
hsa-miR-3929	CENPBD1
hsa-miR-3934	CENPO
hsa-miR-3935	CEP112
hsa-miR-3936	CEP120
hsa-miR-3937	CEP128
hsa-miR-3938	CEP135
hsa-miR-3939	CEP152
hsa-miR-3940-3p	CEP170
hsa-miR-3941	CEP192
hsa-miR-3942-5p	CEP350
hsa-miR-3943	CEP41
hsa-miR-3945	CEP44
hsa-miR-409-3p	CEP55
hsa-miR-409-5p	CEP57
hsa-miR-410	CEP76
hsa-miR-411-3p	CEP85
hsa-miR-411-5p	CEP85L
hsa-miR-412	CEP97
hsa-miR-421	CEPT1
hsa-miR-422a	CERCAM
hsa-miR-423-3p	CERS2
hsa-miR-423-5p	CERS6
hsa-miR-424-3p	CETN3
hsa-miR-424-5p	CFL2
hsa-miR-425-3p	CGGBP1
hsa-miR-425-5p	CH25H
hsa-miR-4251	CHAF1A
hsa-miR-4252	CHAMP1
hsa-miR-4253	CHCHD3
hsa-miR-4254	CHD1
hsa-miR-4255	CHD2
hsa-miR-4256	CHD4
hsa-miR-4257	CHD6
hsa-miR-4259	CHD7
hsa-miR-4260	CHD9
hsa-miR-4261	CHEK1
hsa-miR-4262	CHFR
hsa-miR-4263	CHIC1
hsa-miR-4264	CHIC2
hsa-miR-4265	CHL1
hsa-miR-4266	CHMP2B
hsa-miR-4267	CHMP3
hsa-miR-4268	CHMP4B
hsa-miR-4269	CHMP4C
hsa-miR-4270	CHMP5
hsa-miR-4271	CHMP7
hsa-miR-4272	CHN1
hsa-miR-4273	CHN2
hsa-miR-4274	CHODL
hsa-miR-4275	CHORDC1
hsa-miR-4276	CHPT1
hsa-miR-4277	CHRD
hsa-miR-4278	CHRM3
hsa-miR-4279	CHST1
hsa-miR-4280	CHST11
hsa-miR-4281	CHST2
hsa-miR-4282	CHST3
hsa-miR-4283	CHSY1
hsa-miR-4284	CHSY3
hsa-miR-4286	CHUK
hsa-miR-4287	CHURC1
hsa-miR-4288	CIAPIN1
hsa-miR-4289	CIC
hsa-miR-429	CILP
hsa-miR-4290	CISD3
hsa-miR-4291	CIT
hsa-miR-4292	CITED2
hsa-miR-4293	CKAP4
hsa-miR-4294	CKAP5
hsa-miR-4295	CKS1B
hsa-miR-4296	CKS2
hsa-miR-4297	CLASP1
hsa-miR-4298	CLASP2
hsa-miR-4299	CLASRP
hsa-miR-4300	CLCC1
hsa-miR-4301	CLCN3
hsa-miR-4302	CLCN5
hsa-miR-4303	CLCN6
hsa-miR-4304	CLDN1
hsa-miR-4305	CLDN10
hsa-miR-4306	CLDN11
hsa-miR-4307	CLDN12
hsa-miR-4308	CLDND1
hsa-miR-4309	CLEC2D
hsa-miR-431-3p	CLGN
hsa-miR-431-5p	CLIC4
hsa-miR-4310	CLINT1
hsa-miR-4311	CLIP1
hsa-miR-4312	CLIP4
hsa-miR-4313	CLK1
hsa-miR-4314	CLK4
hsa-miR-4315	CLMP
hsa-miR-4316	CLOCK
hsa-miR-4317	CLPX
hsa-miR-4318	CLSPN
hsa-miR-4319	CLTC
hsa-miR-432-3p	CMIP
hsa-miR-432-5p	CMPK1
hsa-miR-4320	CNEP1R1
hsa-miR-4321	CNIH
hsa-miR-4322	CNIH2
hsa-miR-4323	CNKSR2
hsa-miR-4324	CNKSR3
hsa-miR-4325	CNN1
hsa-miR-4326	CNN3
hsa-miR-4327	CNNM4
hsa-miR-4328	CNOT1
hsa-miR-4329	CNOT2
hsa-miR-433	CNOT4
hsa-miR-4330	CNOT6
hsa-miR-448	CNOT6L
hsa-miR-449a	CNOT7
hsa-miR-449b-3p	CNOT8
hsa-miR-449b-5p	CNR1
hsa-miR-449c-3p	CNST
hsa-miR-449c-5p	CNTD1
hsa-miR-450a-5p	CNTLN
hsa-miR-450b-3p	CNTN1
hsa-miR-450b-5p	CNTN3
hsa-miR-451a	CNTN4
hsa-miR-452-3p	CNTNAP1
hsa-miR-452-5p	CNTRL
hsa-miR-454-3p	COBLL1
hsa-miR-454-5p	COG2
hsa-miR-455-3p	COG3
hsa-miR-455-5p	COG5
hsa-miR-466	COIL
hsa-miR-483-3p	COL10A1
hsa-miR-483-5p	COL11A1
hsa-miR-484	COL11A2
hsa-miR-485-3p	COL12A1
hsa-miR-485-5p	COL13A1
hsa-miR-486-3p	COL14A1
hsa-miR-486-5p	COL15A1
hsa-miR-487a	COL16A1
hsa-miR-487b	COL17A1
hsa-miR-488-3p	COL19A1
hsa-miR-488-5p	COL1A1
hsa-miR-489	COL1A2
hsa-miR-490-3p	COL21A1
hsa-miR-490-5p	COL22A1
hsa-miR-491-3p	COL24A1
hsa-miR-491-5p	COL25A1
hsa-miR-492	COL3A1
hsa-miR-493-3p	COL4A1
hsa-miR-493-5p	COL4A2
hsa-miR-494	COL4A3
hsa-miR-495	COL4A3BP
hsa-miR-496	COL4A4
hsa-miR-497-3p	COL4A5
hsa-miR-497-5p	COL4A6
hsa-miR-498	COL5A1
hsa-miR-499a-3p	COL5A2
hsa-miR-499a-5p	COL5A3
hsa-miR-500a-3p	COL6A3
hsa-miR-500a-5p	COL7A1
hsa-miR-500b	COL8A1
hsa-miR-501-3p	COL9A1
hsa-miR-501-5p	COPB1
hsa-miR-502-3p	COPS2
hsa-miR-502-5p	COPS4
hsa-miR-503	COPS8
hsa-miR-504	CORO1C
hsa-miR-505-3p	CORO2B
hsa-miR-505-5p	CPD
hsa-miR-506-3p	CPEB1
hsa-miR-507	CPEB2
hsa-miR-508-3p	CPEB3
hsa-miR-508-5p	CPEB4
hsa-miR-509-3-5p	CPED1
hsa-miR-509-3p	CPLX1
hsa-miR-509-5p	CPNE2
hsa-miR-510	CPNE8
hsa-miR-511	CPSF6
hsa-miR-512-3p	CPSF7
hsa-miR-512-5p	CRAMP1L
hsa-miR-513a-3p	CRBN
hsa-miR-513a-5p	CREB1
hsa-miR-513b	CREB3L1
hsa-miR-513c-5p	CREB5
hsa-miR-514a-3p	CREBBP
hsa-miR-514b-3p	CREBL2
hsa-miR-514b-5p	CREBRF
hsa-miR-515-3p	CREBZF
hsa-miR-515-5p	CREM
hsa-miR-516a-3p	CRIM1
hsa-miR-516a-5p	CRISPLD1
hsa-miR-516b-3p	CRK
hsa-miR-516b-5p	CRKL
hsa-miR-517-5p	CRLF3
hsa-miR-517a-3p	CROT
hsa-miR-517b-3p	CRTC3
hsa-miR-517c-3p	CRY1
hsa-miR-518a-3p	CRY2
hsa-miR-518a-5p	CS
hsa-miR-518b	CSDA
hsa-miR-518c-3p	CSDE1
hsa-miR-518c-5p	CSE1L
hsa-miR-518d-3p	CSF1
hsa-miR-518d-5p	CSGALNACT1
hsa-miR-518e-3p	CSGALNACT2
hsa-miR-518e-5p	CSK
hsa-miR-518f-3p	CSMD1
hsa-miR-518f-5p	CSMD2
hsa-miR-519a-3p	CSMD3
hsa-miR-519a-5p	CSNK1A1
hsa-miR-519b-3p	CSNK1A1L
hsa-miR-519b-5p	CSNK1E
hsa-miR-519c-3p	CSNK1G1
hsa-miR-519c-5p	CSNK1G3
hsa-miR-519d	CSNK2A1
hsa-miR-519e-3p	CSNK2A2
hsa-miR-519e-5p	CSPP1
hsa-miR-520a-3p	CSRNP2
hsa-miR-520a-5p	CSRNP3
hsa-miR-520b	CSRP2
hsa-miR-520c-3p	CSTF2
hsa-miR-520c-5p	CSTF3
hsa-miR-520d-3p	CTAGE5
hsa-miR-520d-5p	CTBP2
hsa-miR-520e	CTCF
hsa-miR-520f	CTDSP2
hsa-miR-520g	CTDSPL
hsa-miR-520h	CTDSPL2
hsa-miR-521	CTGF
hsa-miR-522-3p	CTHRC1
hsa-miR-522-5p	CTLA4
hsa-miR-523-5p	CTNNA1
hsa-miR-524-3p	CTNNB1
hsa-miR-524-5p	CTNND1
hsa-miR-525-3p	CTNND2
hsa-miR-525-5p	CTPS1
hsa-miR-526a	CTR9
hsa-miR-526b-3p	CTSA
hsa-miR-526b-5p	CTSC
hsa-miR-527	CTTNBP2
hsa-miR-532-3p	CTTNBP2NL
hsa-miR-532-5p	CUL1
hsa-miR-539-5p	CUL2
hsa-miR-541-3p	CUL3
hsa-miR-541-5p	CUL4A
hsa-miR-542-3p	CUL4B
hsa-miR-542-5p	CUL5
hsa-miR-543	CWC15
hsa-miR-544a	CWC22
hsa-miR-544b	CWC25
hsa-miR-545-3p	CXCL10
hsa-miR-545-5p	CXCL12
hsa-miR-548a-3p	CXCL14
hsa-miR-548a-5p	CXCL5
hsa-miR-548aa	CXCR4
hsa-miR-548b-3p	CXCR5
hsa-miR-548b-5p	CXorf23
hsa-miR-548c-3p	CXXC5
hsa-miR-548c-5p	CYB561D1
hsa-miR-548d-3p	CYB5R4
hsa-miR-548d-5p	CYBRD1
hsa-miR-548e	CYFIP1
hsa-miR-548f	CYLD
hsa-miR-548g-3p	CYP26A1
hsa-miR-548h-5p	CYP26B1
hsa-miR-548i	CYP7B1
hsa-miR-548j	CYR61
hsa-miR-548k	CYTH3
hsa-miR-548l	D4S234E
hsa-miR-548m	DAAM1
hsa-miR-548n	DAB2
hsa-miR-548o-3p	DACH1
hsa-miR-548p	DACT1
hsa-miR-548q	DAG1
hsa-miR-548s	DAPK1
hsa-miR-548t-5p	DAZAP1
hsa-miR-548u	DAZAP2
hsa-miR-548v	DAZL
hsa-miR-548w	DBC1
hsa-miR-548x-3p	DBF4
hsa-miR-548y	DCAF12
hsa-miR-548z	DCAF15
hsa-miR-549	DCAF16
hsa-miR-550a-3p	DCAF5
hsa-miR-550a-5p	DCAF6
hsa-miR-550b-3p	DCAF7
hsa-miR-551a	DCAF8
hsa-miR-551b-3p	DCBLD2
hsa-miR-551b-5p	DCC
hsa-miR-552	DCLK1
hsa-miR-553	DCLK2
hsa-miR-554	DCN
hsa-miR-555	DCP1A
hsa-miR-556-3p	DCP2
hsa-miR-556-5p	DCTN4
hsa-miR-557	DCUN1D1
hsa-miR-558	DCUN1D3
hsa-miR-559	DCUN1D4
hsa-miR-561-3p	DCX
hsa-miR-562	DDHD1
hsa-miR-563	DDI2
hsa-miR-564	DDIT4
hsa-miR-566	DDN
hsa-miR-567	DDX17
hsa-miR-568	DDX19A
hsa-miR-569	DDX19B
hsa-miR-570-3p	DDX26B
hsa-miR-571	DDX3X
hsa-miR-572	DDX3Y
hsa-miR-573	DDX46
hsa-miR-574-3p	DDX5
hsa-miR-574-5p	DDX50
hsa-miR-575	DDX52
hsa-miR-576-3p	DDX6
hsa-miR-576-5p	DEDD
hsa-miR-577	DEK
hsa-miR-578	DENND1A
hsa-miR-579	DENND1B
hsa-miR-580	DENND4A
hsa-miR-581	DENND4B
hsa-miR-582-3p	DENND4C
hsa-miR-582-5p	DENND5A
hsa-miR-583	DENND5B
hsa-miR-584-5p	DEPDC1B
hsa-miR-585	DEPDC4
hsa-miR-586	DESI2
hsa-miR-587	DGKB
hsa-miR-588	DGKE
hsa-miR-589-3p	DGKH
hsa-miR-589-5p	DGKI
hsa-miR-590-3p	DGKZ
hsa-miR-590-5p	DHDDS
hsa-miR-591	DHX15
hsa-miR-592	DHX29
hsa-miR-593-3p	DHX30
hsa-miR-593-5p	DHX40
hsa-miR-595	DHX57
hsa-miR-596	DIAPH1
hsa-miR-597	DIAPH2
hsa-miR-598	DICER1
hsa-miR-599	DIDO1
hsa-miR-600	DIP2A
hsa-miR-601	DIP2B
hsa-miR-602	DIP2C
hsa-miR-603	DIRC2
hsa-miR-604	DIS3
hsa-miR-605	DIXDC1
hsa-miR-606	DKK1
hsa-miR-607	DKK3
hsa-miR-608	DLC1
hsa-miR-609	DLG1
hsa-miR-610	DLG2
hsa-miR-612	DLG3
hsa-miR-613	DLG5
hsa-miR-614	DLK2
hsa-miR-615-3p	DLL1
hsa-miR-615-5p	DLL4
hsa-miR-616-3p	DLST
hsa-miR-616-5p	DLX5
hsa-miR-617	DMD
hsa-miR-618	DMRT1
hsa-miR-619	DMRT2
hsa-miR-620	DMRT3
hsa-miR-621	DMRTA2
hsa-miR-622	DMTF1
hsa-miR-623	DMXL1
hsa-miR-624-3p	DMXL2
hsa-miR-624-5p	DNAJA2
hsa-miR-625-3p	DNAJB11
hsa-miR-625-5p	DNAJB14
hsa-miR-626	DNAJB4
hsa-miR-627	DNAJB5
hsa-miR-628-3p	DNAJB6
hsa-miR-628-5p	DNAJB9
hsa-miR-629-3p	DNAJC1
hsa-miR-629-5p	DNAJC11
hsa-miR-630	DNAJC13
hsa-miR-631	DNAJC14
hsa-miR-632	DNAJC16
hsa-miR-633	DNAJC2
hsa-miR-634	DNAJC21
hsa-miR-635	DNAJC27
hsa-miR-636	DNAJC6
hsa-miR-637	DNAJC7
hsa-miR-639	DNAJC8
hsa-miR-640	DNAL1
hsa-miR-641	DNER
hsa-miR-642a-5p	DNM2
hsa-miR-642b-3p	DNM3
hsa-miR-643	DNMT1
hsa-miR-644a	DNMT3A
hsa-miR-645	DNMT3B
hsa-miR-646	DOCK1
hsa-miR-647	DOCK10
hsa-miR-648	DOCK11
hsa-miR-649	DOCK3
hsa-miR-650	DOCK4
hsa-miR-651	DOCK5
hsa-miR-652-3p	DOCK7
hsa-miR-653	DOCK9
hsa-miR-654-3p	DOK5
hsa-miR-654-5p	DOK6
hsa-miR-655	DOLPP1
hsa-miR-656	DOPEY1
hsa-miR-657	DOT1L
hsa-miR-659-3p	DPF3
hsa-miR-660-5p	DPH1
hsa-miR-661	DPH3
hsa-miR-662	DPP3
hsa-miR-663a	DPP4
hsa-miR-663b	DPP8
hsa-miR-664-3p	DPY19L1
hsa-miR-664-5p	DPY19L3
hsa-miR-665	DPYD
hsa-miR-668	DPYSL2
hsa-miR-670	DPYSL3
hsa-miR-671-3p	DPYSL5
hsa-miR-671-5p	DR1
hsa-miR-675-3p	DRD1
hsa-miR-675-5p	DSCAML1
hsa-miR-676-3p	DSEL
hsa-miR-676-5p	DST
hsa-miR-7-1-3p	DSTYK
hsa-miR-7-2-3p	DTNA
hsa-miR-7-5p	DTWD2
hsa-miR-708-3p	DTX2
hsa-miR-708-5p	DUSP1
hsa-miR-711	DUSP2
hsa-miR-720	DUSP5
hsa-miR-744-3p	DUSP6
hsa-miR-744-5p	DUSP7
hsa-miR-758	DVL2
hsa-miR-759	DVL3
hsa-miR-760	DYNC1I1
hsa-miR-761	DYNC1LI1
hsa-miR-762	DYNC1LI2
hsa-miR-764	DYNC2LI1
hsa-miR-765	DYNLL2
hsa-miR-766-3p	DYNLT3
hsa-miR-767-3p	DYRK1A
hsa-miR-767-5p	DYRK1B
hsa-miR-769-3p	DYRK2
hsa-miR-769-5p	E2F1
hsa-miR-770-5p	E2F2
hsa-miR-802	E2F3
hsa-miR-873-5p	E2F5
hsa-miR-874	E2F6
hsa-miR-875-3p	E2F7
hsa-miR-875-5p	E2F8
hsa-miR-876-3p	EAF1
hsa-miR-876-5p	EBAG9
hsa-miR-877-3p	EBF1
hsa-miR-877-5p	EBF2
hsa-miR-885-3p	EBF3
hsa-miR-885-5p	ECT2
hsa-miR-887	EDA
hsa-miR-888-3p	EDAR
hsa-miR-888-5p	EDC3
hsa-miR-889	EDEM1
hsa-miR-890	EDEM3
hsa-miR-891a	EDIL3
hsa-miR-891b	EDN1
hsa-miR-892a	EDNRA
hsa-miR-892b	EDNRB
hsa-miR-9-3p	EEA1
hsa-miR-9-5p	EED
hsa-miR-920	EFEMP1
hsa-miR-921	EFHA2
hsa-miR-922	EFHD2
hsa-miR-924	EFNA5
hsa-miR-92a-1-5p	EFNB1
hsa-miR-92a-2-5p	EFNB2
hsa-miR-92a-3p	EFNB3
hsa-miR-92b-3p	EFR3A
hsa-miR-93-3p	EGLN1
hsa-miR-93-5p	EGR1
hsa-miR-933	EGR2
hsa-miR-934	EGR3
hsa-miR-935	EHBP1
hsa-miR-936	EHD2
hsa-miR-937	EHF
hsa-miR-938	EHMT1
hsa-miR-939	EIF1
hsa-miR-940	EIF2B5
hsa-miR-941	EIF2C1
hsa-miR-942	EIF2C2
hsa-miR-943	EIF2C3
hsa-miR-944	EIF2C4
hsa-miR-95	EIF2S1
hsa-miR-96-3p	EIF2S2
hsa-miR-96-5p	EIF3A
hsa-miR-98	EIF3J
hsa-miR-99a-3p	EIF4A1
hsa-miR-99a-5p	EIF4A2
hsa-miR-99b-3p	EIF4B
hsa-miR-99b-5p	EIF4E
	EIF4E3
	EIF4EBP2
	EIF4ENIF1
	EIF4G2
	EIF4G3
	EIF4H
	EIF5
	EIF5A
	EIF5A2
	EIF5AL1
	ELAVL1
	ELAVL2
	ELAVL4
	ELF1
	ELF2
	ELF4
	ELF5
	ELK3
	ELK4
	ELL
	ELL2
	ELMO1
	ELMO2
	ELMOD1
	ELMOD2
	ELN
	ELOVL2
	ELOVL4
	ELOVL5
	ELP4
	EML1
	EML4
	EMP1
	EMX2
	EN1
	EN2
	ENAH
	ENC1
	ENOSF1
	ENOX2
	ENPEP
	ENPP2
	ENPP5
	ENTPD5
	ENTPD7
	EOGT
	EOMES
	EP300
	EP400
	EPAS1
	EPB41
	EPB41L1
	EPB41L2
	EPB41L3
	EPB41L4B
	EPC1
	EPC2
	EPHA3
	EPHA4
	EPHA5
	EPHA7
	EPHB1
	EPHB2
	EPHB3
	EPHB4
	EPM2AIP1
	EPN2
	EPS15
	EPS8
	EPT1
	ERBB2IP
	ERBB3
	ERBB4
	ERC1
	ERC2
	ERCC4
	ERCC6
	ERCC6L2
	EREG
	ERG
	ERGIC1
	ERGIC2
	ERI1
	ERLIN1
	ERLIN2
	ERMN
	ERO1L
	ERO1LB
	ERRFI1
	ESCO1
	ESPL1
	ESR1
	ESRP1
	ESRP2
	ESRRA
	ESRRG
	ESYT2
	ETAA1
	ETF1
	ETNK1
	ETS1
	ETS2
	ETV1
	ETV3
	ETV5
	ETV6
	EVI2A
	EVI5
	EWSR1
	EXO1
	EXOC5
	EXOSC8
	EXPH5
	EYA1
	EYA4
	EZH1
	EZH2
	F13A1
	F3
	FAF1
	FAF2
	FAM102A
	FAM103A1
	FAM104A
	FAM107B
	FAM108B1
	FAM116A
	FAM117A
	FAM117B
	FAM118B
	FAM120A
	FAM120C
	FAM122A
	FAM122B
	FAM123B
	FAM126A
	FAM126B
	FAM131B
	FAM133B
	FAM134A
	FAM134B
	FAM134C
	FAM135A
	FAM136A
	FAM13A
	FAM13B
	FAM13C
	FAM150B
	FAM155A
	FAM160A1
	FAM160A2
	FAM160B1
	FAM168A
	FAM168B
	FAM171A1
	FAM172A
	FAM175B
	FAM176A
	FAM178A
	FAM179B
	FAM188A
	FAM189A2
	FAM18B1
	FAM18B2
	FAM190A
	FAM190B
	FAM193A
	FAM196A
	FAM199X
	FAM19A1
	FAM19A5
	FAM208A
	FAM208B
	FAM20B
	FAM210A
	FAM214A
	FAM21B
	FAM21C
	FAM222B
	FAM3C
	FAM40A
	FAM43A
	FAM45A
	FAM46A
	FAM48A
	FAM49A
	FAM49B
	FAM53C
	FAM54B
	FAM57A
	FAM59A
	FAM60A
	FAM63B
	FAM65A
	FAM65B
	FAM70A
	FAM73A
	FAM76A
	FAM76B
	FAM81A
	FAM84B
	FAM8A1
	FAM91A1
	FAM96A
	FAM98A
	FAM98B
	FANCA
	FAP
	FAR1
	FARP1
	FASLG
	FASTK
	FAT1
	FAT2
	FAT3
	FAT4
	FAXC
	FBN1
	FBN2
	FBXL17
	FBXL19
	FBXL20
	FBXL3
	FBXL4
	FBXL5
	FBXL7
	FBXO10
	FBXO11
	FBXO17
	FBXO21
	FBXO28
	FBXO3
	FBXO30
	FBXO31
	FBXO33
	FBXO34
	FBXO38
	FBXO45
	FBXO48
	FBXO5
	FBXO8
	FBXW11
	FBXW7
	FCHO1
	FCHO2
	FCHSD2
	FEM1B
	FEM1C
	FERMT2
	FEZ2
	FEZF2
	FGD1
	FGD4
	FGD5
	FGD6
	FGF1
	FGF11
	FGF13
	FGF14
	FGF18
	FGF2
	FGF7
	FGF9
	FGFR1
	FGFR1OP2
	FIBIN
	FIGF
	FIGN
	FIGNL2
	FILIP1L
	FIP1L1
	FKBP1A
	FKBP1B
	FKBP3
	FLI1
	FLOT2
	FLRT2
	FLRT3
	FLT1
	FLVCR2
	FMNL2
	FMR1
	FN1
	FNBP1L
	FNBP4
	FNDC3A
	FNDC3B
	FNDC4
	FNIP1
	FNIP2
	FNTA
	FOPNL
	FOS
	FOSB
	FOSL1
	FOSL2
	FOXA1
	FOXC1
	FOXD1
	FOXF1
	FOXF2
	FOXG1
	FOXJ2
	FOXJ3
	FOXN2
	FOXN3
	FOXO1
	FOXO3
	FOXP1
	FOXP2
	FOXQ1
	FRK
	FRMD3
	FRMD4A
	FRMD4B
	FRMD6
	FRS2
	FRY
	FRYL
	FRZB
	FSCN1
	FST
	FSTL1
	FTSJD1
	FUBP1
	FUBP3
	FURIN
	FUT4
	FUT8
	FXR1
	FYCO1
	FYTTD1
	FZD1
	FZD10
	FZD3
	FZD4
	FZD6
	FZD7
	G0S2
	G2E3
	G3BP1
	G3BP2
	GAB1
	GABARAPL2
	GABBR2
	GABPA
	GABPB1
	GABPB2
	GABRB2
	GABRB3
	GABRP
	GADD45A
	GALC
	GALNT1
	GALNT10
	GALNT13
	GALNT2
	GALNT3
	GALNT4
	GALNT7
	GALNTL2
	GAN
	GANAB
	GAP43
	GAPVD1
	GARS
	GAS1
	GAS2
	GAS7
	GATA2
	GATA3
	GATA6
	GATAD2B
	GATC
	GATM
	GBF1
	GCC2
	GCFC1
	GCLC
	GCLM
	GCN1L1
	GCNT2
	GCNT4
	GDAP2
	GDF10
	GDF11
	GDF6
	GDI2
	GDPD1
	GEM
	GFPT1
	GFPT2
	GFRA1
	GGA1
	GGA3
	GGNBP2
	GHITM
	GHR
	GIGYF1
	GIGYF2
	GIT2
	GJA1
	GJC1
	GKAP1
	GLCCI1
	GLCE
	GLG1
	GLI2
	GLI3
	GLIPR1
	GLIS1
	GLIS2
	GLIS3
	GLRA3
	GLRB
	GLS
	GLS2
	GLUD1
	GLUD2
	GLUL
	GLYR1
	GMCL1
	GMDS
	GMEB1
	GMFB
	GNA12
	GNA13
	GNAI1
	GNAI3
	GNAL
	GNAO1
	GNAQ
	GNB1
	GNB4
	GNG10
	GNG12
	GNG2
	GNPDA2
	GNPTAB
	GNRHR
	GNS
	GOLGA1
	GOLGA2
	GOLGA4
	GOLGA7
	GOLIM4
	GOLPH3
	GOLT1B
	GON4L
	GOPC
	GORAB
	GORASP2
	GOSR1
	GPAM
	GPATCH8
	GPBP1
	GPBP1L1
	GPC4
	GPC6
	GPCPD1
	GPD2
	GPKOW
	GPM6A
	GPM6B
	GPN1
	GPR116
	GPR124
	GPR125
	GPR126
	GPR135
	GPR137
	GPR137B
	GPR137C
	GPR153
	GPR156
	GPR158
	GPR180
	GPR3
	GPR34
	GPR37
	GPR63
	GPR64
	GPR85
	GPR88
	GPRASP2
	GPX7
	GRAMD1A
	GRAMD1B
	GRAMD3
	GRB10
	GRB2
	GREB1
	GREM1
	GREM2
	GRHL1
	GRHL2
	GRHL3
	GRIA2
	GRIA3
	GRIA4
	GRID1
	GRIK2
	GRIN2A
	GRIN3A
	GRIP1
	GRK5
	GRK6
	GRM3
	GRM5
	GRM7
	GRPEL2
	GRSF1
	GSK3B
	GSPT1
	GSPT2
	GTDC1
	GTF2A1
	GTF2B
	GTF2H1
	GTF2I
	GTPBP1
	GTPBP2
	GUCY1A3
	GUCY1B3
	GULP1
	GXYLT1
	GXYLT2
	GZF1
	H2AFY
	H2AFZ
	H3F3A
	H3F3B
	H3F3C
	HABP4
	HACE1
	HAND2
	HAPLN1
	HAS2
	HAT1
	HBEGF
	HBP1
	HBS1L
	HCFC1
	HCFC2
	HCN1
	HCN2
	HDAC4
	HDAC5
	HDAC9
	HDGF
	HDGFRP3
	HDHD2
	HDX
	HEATR5A
	HECA
	HECTD1
	HECTD2
	HECW1
	HECW2
	HEG1
	HELZ
	HEPHL1
	HERC1
	HERC2
	HERC3
	HERC4
	HERPUD1
	HERPUD2
	HEY1
	HEY2
	HGF
	HIAT1
	HIATL1
	HIC1
	HIF1A
	HIF1AN
	HIPK1
	HIPK2
	HIPK3
	HIRA
	HIST1H1C
	HIST1H1D
	HIST1H1E
	HIST1H2AC
	HIST1H2AD
	HIST1H2AE
	HIST1H2AJ
	HIST1H2AK
	HIST1H2AM
	HIST1H2BC
	HIST1H2BE
	HIST1H2BF
	HIST1H2BG
	HIST1H2BH
	HIST1H2BL
	HIST1H2BN
	HIST1H2BO
	HIST1H3B
	HIST1H3D
	HIST1H3E
	HIST1H3F
	HIST1H3H
	HIST1H3J
	HIST1H4D
	HIST1H4H
	HIST2H2AA3
	HIST2H2BE
	HIST2H3C
	HIST2H3D
	HIST3H2A
	HIST3H2BB
	HIVEP1
	HIVEP2
	HK1
	HK2
	HLF
	HLTF
	HLX
	HMBOX1
	HMCN1
	HMG20A
	HMGA1
	HMGA2
	HMGB2
	HMGB3
	HMGCR
	HMGCS1
	HMGN2
	HMGN3
	HMGXB4
	HMP19
	HN1
	HNRNPA0
	HNRNPA1
	HNRNPA1L2
	HNRNPA2B1
	HNRNPA3
	HNRNPC
	HNRNPD
	HNRNPF
	HNRNPH1
	HNRNPH2
	HNRNPH3
	HNRNPK
	HNRNPL
	HNRNPM
	HNRNPR
	HNRNPU
	HNRNPUL1
	HNRNPUL2
	HNRPDL
	HNRPLL
	HOMER1
	HOOK1
	HOOK3
	HOXA1
	HOXA10
	HOXA11
	HOXA3
	HOXA4
	HOXA5
	HOXA7
	HOXA9
	HOXB3
	HOXB4
	HOXB5
	HOXB8
	HOXC11
	HOXC4
	HOXC6
	HOXC8
	HOXD1
	HOXD10
	HOXD8
	HP1BP3
	HPGD
	HPRT1
	HPS5
	HS2ST1
	HS3ST3A1
	HS3ST3B1
	HS3ST5
	HS6ST2
	HSF2
	HSF5
	HSP90AB1
	HSPA13
	HSPA14
	HSPA4
	HSPA4L
	HSPA5
	HSPA8
	HSPA9
	HSPB8
	HSPH1
	HTR2A
	HTR2C
	HTR7
	HTRA1
	HTRA3
	HUWE1
	IBSP
	IBTK
	ICK
	ICMT
	ID1
	ID2
	ID4
	IDE
	IDH1
	IER3IP1
	IFFO2
	IFRD1
	IFT81
	IGDCC3
	IGDCC4
	IGF1
	IGF1R
	IGF2BP1
	IGF2BP2
	IGF2BP3
	IGF2R
	IGFBP3
	IGFBP5
	IGFBP7
	IGIP
	IGSF1
	IGSF10
	IGSF3
	IKBIP
	IKBKAP
	IKBKB
	IKBKE
	IKZF1
	IKZF2
	IKZF4
	IL10
	IL13RA1
	IL1RAP
	IL6
	IL6ST
	ILF3
	IMPACT
	IMPAD1
	INADL
	ING3
	INHBA
	INHBB
	INO80
	INO80D
	INPP4A
	INPP5A
	INSIG2
	INSM1
	INSR
	INTS2
	INTS6
	INTS8
	INTU
	IP6K2
	IPMK
	IPO11
	IPO5
	IPO7
	IPO8
	IPO9
	IPPK
	IQCH
	IQCK
	IQGAP1
	IQGAP2
	IQSEC1
	IREB2
	IRF1
	IRF2
	IRF2BP1
	IRF2BP2
	IRF2BPL
	IRF4
	IRF9
	IRS1
	IRS2
	IRX4
	IRX5
	ISCA2
	ISG20L2
	ISL1
	ISM1
	IST1
	ITCH
	ITFG1
	ITGA11
	ITGA4
	ITGA5
	ITGA6
	ITGAV
	ITGB1
	ITGB3
	ITGB8
	ITM2B
	ITM2C
	ITPK1
	ITPR1
	ITPR3
	ITPRIPL2
	ITSN1
	ITSN2
	IVNS1ABP
	JAG1
	JAK1
[truncated: 2,888 more rows]

## Sheet: Basal-like
No.	Regulator		Average expression (normalized read counts)		Expression difference		Target set enrichment analysis by running-sum statistic
	Type	ID	Basal-like	Others	Log2 fold change	U-test p-val (two-tailed)	Number of Targets	Log2 fold change of targets (average)	pFET	Adjusted P-val
1	miRNA	hsa-miR-105-5p	103.835	20.6939	2.32702	4.21848e-13	639	-0.34578	1.1872e-11	9.20077e-09
2	miRNA	hsa-miR-106b-5p	496.218	214.776	1.20814	4.45445e-27	782	-0.64395	3.8317e-08	4.65552e-05
3	miRNA	hsa-miR-137	1.13514	0.160737	2.82009	0.000310797	551	-0.57713	1.08938e-07	8.72591e-05
4	miRNA	hsa-miR-15a-5p	164.531	133.54	0.301084	5.73285e-06	842	-0.44197	8.47827e-09	8.97001e-06
5	miRNA	hsa-miR-19a-3p	109.721	23.568	2.21893	7.81929e-27	767	-0.6225	4.30065e-09	5.00595e-06
6	miRNA	hsa-miR-19b-3p	349.822	108.252	1.69222	1.15428e-25	748	-0.6025	5.83009e-09	6.31982e-06
7	miRNA	hsa-miR-200b-3p	1142.65	737.726	0.631228	9.82108e-07	658	-0.47764	5.95677e-08	4.99177e-05
8	miRNA	hsa-miR-23a-3p	6727.88	3932.77	0.774607	4.97728e-16	658	-0.59616	1.75996e-08	1.4678e-05
9	miRNA	hsa-miR-25-3p	16117.8	9573.98	0.751466	2.78223e-16	475	-0.65945	1.6728e-08	1.13082e-05
10	miRNA	hsa-miR-516b-5p	0.572774	0.541499	0.081008	0.000181742	153	-0.52372	2.1425e-08	4.15645e-06
11	miRNA	hsa-miR-570-3p	1.61059	0.478967	1.74959	1.37617e-05	690	-0.43127	1.7682e-08	1.47822e-05
12	miRNA	hsa-miR-582-5p	17.5495	5.62659	1.6411	3.90179e-11	624	-0.41244	7.6364e-08	5.94112e-05
13	miRNA	hsa-miR-9-3p	16.0608	1.88934	3.08759	4.85313e-19	650	-0.43333	3.3582e-08	2.75372e-05
14	ceRNA	HDGFRP3	36.0051	52.1845	-0.535419	1.76152e-07	41	-0.43063	5.11255e-07	2.30065e-05
15	ceRNA	SELT	45.3632	68.0628	-0.585342	8.30429e-17	39	-0.72319	2.06943e-09	8.69159e-08
16	ceRNA	ABI1	52.4609	38.6036	0.442508	2.9815e-06	325	-0.09966	2.31077e-15	7.55621e-13
17	ceRNA	ACVR2B	2.96182	3.51386	-0.246573	0.000228451	250	-0.34124	5.85553e-27	1.53415e-24
18	ceRNA	ADAM10	33.8373	42.1828	-0.318038	2.86122e-05	116	-0.37427	1.0956e-13	1.42428e-11
19	ceRNA	ADAM22	1.22196	1.84387	-0.593546	1.18482e-06	22	-0.48003	2.08048e-06	4.57707e-05
20	ceRNA	ADAMTS9	6.24404	3.75273	0.734539	1.4883e-06	18	1.58651	2.43064e-07	4.61822e-06
21	ceRNA	ADNP	65.5874	77.6932	-0.244371	0.000489843	137	-0.34883	1.8815e-12	2.84106e-10
22	ceRNA	AFF1	12.9818	23.8651	-0.878408	1.30085e-21	180	-0.1739	1.69625e-09	3.23983e-07
23	ceRNA	AFF4	18.7996	35.8191	-0.930029	3.62079e-19	536	-0.30819	7.04471e-24	4.0648e-21
24	ceRNA	AFTPH	35.4182	49.0519	-0.469819	1.97313e-12	53	-0.3797	4.61135e-08	2.49013e-06
25	ceRNA	AGGF1	12.4362	21.4572	-0.786919	3.59291e-24	49	-0.48685	8.86231e-10	4.51978e-08
26	ceRNA	AKAP11	9.00391	13.1286	-0.544091	4.5225e-08	255	-0.18621	8.58342e-15	2.24027e-12
27	ceRNA	AKAP9	26.137	45.9115	-0.812763	1.8469e-10	232	-0.34691	2.30887e-19	5.77217e-17
28	ceRNA	ALCAM	36.4457	120.556	-1.72588	2.74776e-25	56	-1.31858	3.06762e-07	3.25168e-05
29	ceRNA	ANKFY1	15.5192	18.9525	-0.288334	0.000164778	166	-0.22295	1.31573e-12	2.2762e-10
30	ceRNA	ANKHD1	43.7385	59.0517	-0.433074	7.11904e-10	61	-0.24508	3.97826e-08	2.46652e-06
31	ceRNA	ANKRA2	6.58878	15.3488	-1.22005	2.42742e-32	330	-0.47314	2.88553e-12	1.11381e-09
32	ceRNA	ANKRD12	8.93218	11.3281	-0.342821	0.000155274	190	-0.28002	2.87928e-19	5.75856e-17
33	ceRNA	ANKRD50	11.3725	25.3345	-1.15555	5.56806e-17	381	-0.23113	1.51383e-19	6.0856e-17
34	ceRNA	ANKRD52	12.2751	16.9602	-0.466422	4.31723e-07	184	-0.17538	1.96761e-12	3.71878e-10
35	ceRNA	AP3M1	20.4793	29.9123	-0.546572	6.02396e-14	64	-0.25408	2.45638e-07	1.64578e-05
36	ceRNA	AP4E1	5.31917	6.94709	-0.385207	9.59245e-07	58	-0.24754	8.29793e-07	4.97876e-05
37	ceRNA	APC	5.91172	8.94181	-0.596988	3.9396e-13	180	-0.27139	2.157e-11	4.07673e-09
38	ceRNA	APPL1	23.1027	27.6667	-0.26009	0.000195967	181	-0.22447	1.81484e-19	3.28486e-17
39	ceRNA	ARF6	75.3283	95.7075	-0.34544	1.52346e-08	102	-0.30322	1.33372e-16	1.38707e-14
40	ceRNA	ARFGEF1	44.9668	70.605	-0.650911	9.97755e-09	129	-0.53055	7.71148e-16	1.17214e-13
41	ceRNA	ARFGEF2	23.6365	35.3746	-0.581697	6.05092e-08	71	-0.21273	1.72292e-08	1.22327e-06
42	ceRNA	ARFIP1	23.8985	37.6652	-0.656312	1.76835e-18	229	-0.36761	2.54314e-19	6.28157e-17
43	ceRNA	ARHGAP12	22.5062	29.2738	-0.379285	1.98958e-06	180	-0.25181	1.19158e-13	2.26401e-11
44	ceRNA	ARHGAP32	9.33013	24.2527	-1.37818	2.01559e-26	38	-0.88241	5.82877e-11	2.73952e-09
45	ceRNA	ARHGEF12	30.6389	45.9039	-0.583251	1.33156e-12	121	-0.26373	5.04146e-13	6.201e-11
46	ceRNA	ARHGEF3	17.1293	29.3747	-0.77811	8.93784e-14	66	-0.75344	3.36374e-07	3.22919e-05
47	ceRNA	ARID2	8.63584	14.5317	-0.75079	5.96433e-18	346	-0.39445	1.6371e-30	6.04091e-28
48	ceRNA	ARID4A	5.85483	8.61007	-0.556398	5.97117e-10	596	-0.34016	9.44072e-42	6.0987e-39
49	ceRNA	ARL8B	66.628	89.5841	-0.427115	1.73493e-09	167	-0.43294	1.19713e-19	2.09497e-17
50	ceRNA	ARPP19	48.9518	74.5574	-0.606991	4.81853e-15	183	-0.32798	6.56149e-20	1.24668e-17
51	ceRNA	ASAP1	24.3198	19.2197	0.339547	0.000701352	189	-0.07995	4.74159e-10	8.96161e-08
52	ceRNA	ATF1	13.6612	17.1732	-0.330081	2.5071e-07	105	-0.28924	3.29263e-10	3.68774e-08
53	ceRNA	ATG14	7.59221	10.8691	-0.517634	2.7473e-12	76	-0.3113	2.00988e-07	1.70839e-05
54	ceRNA	ATP2B1	12.6045	16.9891	-0.43067	8.63072e-08	414	-0.30818	5.3223e-32	2.3631e-29
55	ceRNA	ATRX	13.5217	17.7149	-0.389687	9.8564e-06	500	-0.21069	6.78087e-29	3.47181e-26
56	ceRNA	ATXN1	10.2419	13.9962	-0.450557	9.36619e-08	538	-0.30443	2.59631e-11	1.71357e-08
57	ceRNA	ATXN2	21.8286	25.8955	-0.246482	3.29813e-05	28	-0.36292	3.09831e-07	8.67526e-06
58	ceRNA	AXIN2	2.57183	5.92429	-1.20385	2.53706e-18	44	-1.01461	3.35956e-07	1.88135e-05
59	ceRNA	BAG4	11.8261	16.2202	-0.455808	0.00045227	62	-0.4631	1.68185e-07	1.21093e-05
60	ceRNA	BAZ2A	23.3941	36.2307	-0.631065	1.17389e-17	309	-0.33246	5.35478e-28	1.76172e-25
61	ceRNA	BAZ2B	6.98982	9.72242	-0.476059	1.70089e-07	428	-0.38096	1.21147e-29	5.65757e-27
62	ceRNA	BBX	17.42	21.1175	-0.277699	0.000892467	539	-0.28984	6.15722e-39	3.60197e-36
63	ceRNA	BCL11B	2.68291	1.23147	1.12341	2.15928e-08	100	1.42281	3.27568e-10	8.1892e-08
64	ceRNA	BCL2	10.096	31.732	-1.65216	4.58712e-21	52	-1.25116	4.66999e-13	3.64259e-11
65	ceRNA	BCL2L11	15.6394	23.061	-0.560266	1.0214e-09	297	-0.20648	3.09749e-20	9.35441e-18
66	ceRNA	BCL2L2	20.6815	25.1115	-0.280009	1.59105e-05	57	-0.25397	2.36794e-07	1.37341e-05
67	ceRNA	BCOR	17.1366	25.0731	-0.549058	1.50362e-11	91	-0.54589	1.64984e-14	1.63335e-12
68	ceRNA	BDP1	9.55141	14.4179	-0.594075	1.97374e-10	59	-0.36936	3.56586e-08	2.28215e-06
69	ceRNA	BECN1	51.7085	87.6207	-0.760868	2.07811e-19	96	-0.367	4.47121e-12	4.33708e-10
70	ceRNA	BICD2	17.125	13.6279	0.32954	6.04288e-05	214	-0.021	2.22763e-12	4.76713e-10
71	ceRNA	BMI1	39.0642	71.2794	-0.867638	9.71396e-13	142	-0.45844	2.92726e-16	4.44943e-14
72	ceRNA	BMPR2	17.7423	21.9986	-0.310217	6.35865e-05	199	-0.21666	3.19735e-07	7.00219e-05
73	ceRNA	BNIP3L	45.6805	73.7896	-0.691838	7.60326e-14	48	-0.74573	8.78994e-07	5.53766e-05
74	ceRNA	BOD1L1	9.20571	12.563	-0.448584	6.33918e-08	337	-0.31476	9.36529e-30	3.35277e-27
75	ceRNA	BPTF	27.9772	35.1217	-0.328111	0.000252846	196	-0.28218	1.3554e-13	2.75147e-11
76	ceRNA	BRPF3	26.4153	32.0725	-0.279963	1.18919e-05	51	-0.35549	1.31174e-07	6.68988e-06
77	ceRNA	BRWD1	21.8717	28.7881	-0.396406	1.90805e-07	431	-0.35794	1.49751e-38	6.82865e-36
78	ceRNA	BTBD10	22.0448	26.2512	-0.251948	2.31231e-05	173	-0.25857	1.06608e-09	2.10017e-07
79	ceRNA	BTBD7	10.7601	14.0101	-0.380773	3.02328e-07	393	-0.27735	1.92542e-27	8.18302e-25
80	ceRNA	BZW1	150.446	221.872	-0.560478	1.0021e-14	97	-0.52901	6.01473e-12	7.21768e-10
81	ceRNA	C12orf51	6.36344	10.7036	-0.750221	5.39221e-13	191	-0.35066	7.97521e-21	1.57909e-18
82	ceRNA	C14orf129	19.2588	27.4891	-0.513344	6.00751e-15	71	-0.51311	1.66266e-10	1.29688e-08
83	ceRNA	C16orf52	9.1368	12.9659	-0.504964	2.86376e-10	495	-0.35267	1.12094e-35	6.00825e-33
84	ceRNA	C16orf70	15.8489	20.5369	-0.373839	6.82803e-06	66	-0.35581	9.74988e-09	7.01991e-07
85	ceRNA	C16orf72	23.6301	33.9042	-0.520838	1.73493e-13	293	-0.26527	2.27798e-24	6.83394e-22
86	ceRNA	C5orf15	47.6496	78.7961	-0.725661	1.31258e-21	58	-0.43978	3.36794e-07	2.25652e-05
87	ceRNA	C5orf24	20.1731	30.4219	-0.592681	1.03722e-11	522	-0.31023	2.84754e-35	1.53482e-32
88	ceRNA	C6orf211	16.532	113.486	-2.77918	1.90048e-36	23	-1.40331	1.55048e-10	4.03124e-09
89	ceRNA	C7orf60	7.08175	5.63298	0.330207	3.23203e-05	443	0.0883	1.941e-22	8.77331e-20
90	ceRNA	CAB39	49.9195	58.1496	-0.220167	0.000228451	299	-0.26678	1.01017e-18	3.36386e-16
91	ceRNA	CADM2	0.167616	1.08087	-2.68896	2.26506e-13	30	-2.4397	1.0097e-07	8.17856e-06
92	ceRNA	CAMLG	25.4439	41.9225	-0.720401	2.61561e-25	9	-1.31887	1.72851e-06	1.55566e-05
93	ceRNA	CANX	300.288	375.494	-0.322441	6.98285e-07	55	-0.43261	1.9333e-10	1.08265e-08
94	ceRNA	CAPZA2	72.0603	81.9785	-0.186042	0.000941058	235	-0.23779	2.80462e-17	7.03959e-15
95	ceRNA	CASC4	40.9384	72.6183	-0.826879	1.82746e-23	112	-0.40977	2.24086e-11	2.66662e-09
96	ceRNA	CASD1	10.5188	29.8869	-1.50655	3.16541e-21	51	-0.53165	1.88949e-08	1.1148e-06
97	ceRNA	CBFB	42.0805	28.5329	0.560528	8.53138e-16	264	0.26078	7.90181e-20	2.24412e-17
98	ceRNA	CCDC117	25.9542	44.6009	-0.781104	0.000408718	34	-0.32016	9.46932e-08	3.40895e-06
99	ceRNA	CCDC126	5.62493	11.4008	-1.01923	3.57447e-12	35	-0.49842	2.37426e-09	8.30991e-08
100	ceRNA	CCDC88A	19.9363	8.57721	1.21682	1.10952e-14	198	0.26047	8.00949e-08	1.68199e-05
101	ceRNA	CCNE1	23.6544	4.76955	2.31018	3.48982e-35	16	1.38006	2.56116e-09	4.8662e-08
102	ceRNA	CCNJ	7.76502	4.26458	0.864588	5.92003e-15	228	0.08402	2.30209e-12	5.57106e-10
103	ceRNA	CCNT2	12.4047	15.4417	-0.315939	1.15433e-05	509	-0.27076	2.48868e-34	1.38371e-31
104	ceRNA	CCNY	58.6461	37.3519	0.650852	1.97907e-15	92	0.33281	4.70941e-07	4.61522e-05
105	ceRNA	CCP110	11.4504	14.6901	-0.359443	1.49394e-05	89	-0.30424	4.52876e-12	4.07588e-10
106	ceRNA	CD164	209.71	334.075	-0.671775	3.05682e-13	27	-0.46362	2.71144e-06	8.13431e-05
107	ceRNA	CDC23	22.6031	27.7299	-0.294924	5.41761e-07	95	-0.20958	2.08049e-09	2.01808e-07
108	ceRNA	CDC25A	9.1809	3.5026	1.39021	1.06046e-24	122	0.45152	1.56014e-09	2.29341e-07
109	ceRNA	CDC42	227.528	287.114	-0.33558	7.63624e-10	142	-0.35083	9.51225e-13	1.57903e-10
110	ceRNA	CDK12	16.2092	26.3215	-0.699428	2.49926e-06	216	-0.30114	1.13174e-18	2.603e-16
111	ceRNA	CDK17	12.009	24.1358	-1.00706	2.80645e-24	763	-0.42054	3.31971e-37	2.85163e-34
112	ceRNA	CDK19	19.8853	13.6198	0.545995	2.6082e-07	212	0.17078	1.18207e-14	2.63601e-12
113	ceRNA	CDK8	14.3695	9.01478	0.67265	5.61149e-12	129	0.01809	5.50404e-08	7.21029e-06
114	ceRNA	CDKN2AIP	14.324	18.2336	-0.348159	1.46098e-06	106	-0.24673	3.3423e-12	3.60969e-10
115	ceRNA	CENPO	14.9529	8.75112	0.77289	4.02048e-14	101	-0.02111	4.70591e-07	5.03533e-05
116	ceRNA	CEP120	6.04459	10.7963	-0.836821	2.56703e-17	185	-0.37832	2.18321e-15	4.30093e-13
117	ceRNA	CEP170	29.876	17.1544	0.800405	2.93715e-14	255	0.06125	1.2943e-11	3.35224e-09
118	ceRNA	CEP55	33.9828	14.7997	1.19924	8.11965e-23	72	0.34655	1.98443e-08	1.50816e-06
119	ceRNA	CERS6	17.2546	52.3806	-1.60206	6.37043e-29	118	-0.23605	8.10103e-07	9.72123e-05
120	ceRNA	CGGBP1	37.2024	48.1374	-0.371764	1.0769e-08	171	-0.38559	2.52226e-21	4.61574e-19
121	ceRNA	CHD1	15.2016	25.8317	-0.764919	2.71897e-16	83	-0.48357	3.41717e-11	3.10962e-09
122	ceRNA	CHD6	12.798	23.113	-0.852782	4.50702e-21	268	-0.36412	2.9204e-20	8.52756e-18
123	ceRNA	CHIC1	2.0361	3.65167	-0.842747	1.57126e-14	172	-0.46993	7.52304e-18	1.46699e-15
124	ceRNA	CIT	6.99132	4.91536	0.508267	1.94645e-07	110	0.05631	6.47111e-08	7.18294e-06
125	ceRNA	CLASP2	12.5493	17.8035	-0.504552	1.30656e-11	187	-0.32394	1.63503e-13	3.33547e-11
126	ceRNA	CLCN3	28.9519	39.2809	-0.440171	3.91737e-07	71	-0.33795	1.9225e-09	1.40343e-07
127	ceRNA	CLOCK	6.22735	8.37632	-0.427699	3.48932e-06	210	-0.19152	2.25979e-14	5.12972e-12
128	ceRNA	CLTC	119.875	221.678	-0.886935	7.76882e-11	67	-0.36759	1.60165e-10	1.18522e-08
129	ceRNA	CNIH	67.09	94.2205	-0.489943	5.62201e-16	71	-0.6994	1.12117e-12	9.30568e-11
130	ceRNA	CNOT2	37.078	47.8951	-0.369315	1.10798e-07	69	-0.44501	3.35565e-08	2.75164e-06
131	ceRNA	CNOT6	16.769	21.6531	-0.368776	2.41502e-08	475	-0.23093	2.22843e-26	1.11867e-23
132	ceRNA	CNOT6L	11.9035	14.4927	-0.283944	1.96809e-05	555	-0.29869	2.12292e-31	1.20794e-28
133	ceRNA	COG2	22.1518	38.4043	-0.793848	2.8971e-21	25	-1.03427	1.52107e-08	4.259e-07
134	ceRNA	COG3	11.6625	16.0447	-0.46022	3.80522e-11	38	-0.35563	4.83452e-07	1.93381e-05
135	ceRNA	COL4A3BP	8.87664	17.9072	-1.01246	2.31398e-27	397	-0.50716	4.48148e-21	2.057e-18
136	ceRNA	COPS2	31.6479	37.8647	-0.258741	7.18519e-07	187	-0.27667	6.75557e-22	1.30382e-19
137	ceRNA	CPD	28.0504	50.5787	-0.850505	3.83337e-15	140	-0.37956	1.7967e-12	2.73098e-10
138	ceRNA	CPEB2	4.94509	16.7168	-1.75723	3.74878e-30	553	-0.70057	2.71328e-21	2.04853e-18
139	ceRNA	CPEB3	1.56321	2.80558	-0.843781	1.42755e-18	778	-0.46616	7.65703e-41	6.73053e-38
140	ceRNA	CPEB4	8.33741	18.628	-1.1598	7.3745e-21	578	-0.55043	2.55942e-31	1.80695e-28
141	ceRNA	CREBBP	20.0158	26.3912	-0.398919	4.38056e-07	236	-0.21618	5.60121e-19	1.35549e-16
142	ceRNA	CREBL2	26.956	42.5832	-0.659678	1.64172e-15	71	-0.62672	7.10606e-10	5.61379e-08
143	ceRNA	CREBRF	4.47035	7.77648	-0.798728	1.43794e-11	844	-0.3878	1.61418e-30	1.58996e-27
144	ceRNA	CSNK1G1	7.55775	11.2403	-0.572652	1.75195e-11	170	-0.40558	1.768e-13	3.25312e-11
145	ceRNA	CSNK1G3	11.2676	19.7213	-0.807569	4.23718e-21	253	-0.45615	1.92682e-23	5.18314e-21
146	ceRNA	CSRNP2	19.0037	27.0665	-0.510226	9.71396e-13	59	-0.30381	1.07399e-08	6.44395e-07
147	ceRNA	CUL3	22.1337	28.8673	-0.383188	1.4564e-11	336	-0.22968	1.56567e-24	5.43287e-22
148	ceRNA	CWC22	21.2823	16.8756	0.334715	5.85044e-07	34	0.31016	4.83425e-07	1.69199e-05
149	ceRNA	CXorf23	5.29936	8.066	-0.606036	1.97923e-14	46	-0.31285	7.06434e-07	3.32024e-05
150	ceRNA	DAZAP2	192.908	329.309	-0.771529	9.35386e-29	157	-0.45949	3.94828e-09	7.54122e-07
151	ceRNA	DCAF5	15.6449	25.6945	-0.715761	7.40583e-23	41	-0.44416	1.47377e-06	6.18983e-05
152	ceRNA	DCAF8	48.6649	65.6073	-0.430973	1.512e-09	95	-0.23599	4.7748e-09	4.72705e-07
153	ceRNA	DCLK1	4.00215	13.53	-1.75732	5.32763e-11	167	-0.63781	3.88125e-11	8.18943e-09
154	ceRNA	DCP1A	9.06079	10.6347	-0.231071	0.00087196	261	-0.31337	6.82261e-18	1.95809e-15
155	ceRNA	DCUN1D3	4.60442	6.01251	-0.384947	1.53851e-07	158	-0.26958	2.87204e-10	5.02607e-08
156	ceRNA	DDI2	5.88324	8.92198	-0.600752	1.41442e-05	73	-0.17367	1.10054e-08	8.25408e-07
157	ceRNA	DDX46	26.0345	31.1151	-0.257188	0.000331949	103	-0.25682	2.74506e-12	2.88231e-10
158	ceRNA	DDX5	276.4	358.949	-0.377022	9.95738e-08	142	-0.27043	4.53315e-12	6.89039e-10
159	ceRNA	DENND1B	5.20096	11.4532	-1.1389	0.000172906	73	-0.31294	3.1356e-08	2.44577e-06
160	ceRNA	DENND4A	5.20604	6.59171	-0.340468	6.2574e-06	50	-0.30696	1.08322e-06	5.74106e-05
161	ceRNA	DENND4C	16.2728	21.3745	-0.393427	9.19395e-07	221	-0.19927	5.03849e-17	1.12358e-14
162	ceRNA	DHX29	16.3957	27.416	-0.741697	1.21028e-18	45	-0.38079	2.43816e-09	1.12155e-07
163	ceRNA	DHX40	41.2473	69.8668	-0.760309	2.80207e-12	91	-0.65636	4.30724e-10	4.60875e-08
164	ceRNA	DICER1	15.6151	20.8707	-0.418535	1.68611e-06	370	-0.24894	2.57806e-28	9.61616e-26
165	ceRNA	DIP2B	16.3223	21.5873	-0.403342	1.38422e-07	120	-0.19656	2.73709e-12	3.31188e-10
166	ceRNA	DMXL1	7.95732	14.5969	-0.87531	3.89864e-22	130	-0.55264	1.64511e-16	2.35251e-14
167	ceRNA	DNAJC16	8.61899	13.9261	-0.692201	2.8914e-17	127	-0.13503	2.45275e-10	3.2131e-08
168	ceRNA	DPP8	7.9917	11.9182	-0.576589	2.67308e-09	129	-0.31835	2.23693e-13	3.04223e-11
169	ceRNA	DPY19L3	9.25911	14.3653	-0.633638	1.46577e-11	77	-0.47798	1.06215e-08	8.60345e-07
170	ceRNA	E2F3	24.6092	9.39726	1.38889	4.72719e-28	294	0.28194	5.7905e-13	1.8298e-10
171	ceRNA	E2F5	24.6484	14.5934	0.756171	8.60794e-09	110	0.15345	8.98678e-09	1.02449e-06
172	ceRNA	EEA1	6.94714	9.30272	-0.421234	3.97204e-06	361	-0.21617	4.70961e-18	1.72843e-15
173	ceRNA	EED	25.1308	18.1325	0.470883	2.25778e-11	51	0.26183	1.23303e-06	6.28848e-05
174	ceRNA	EFR3A	37.0426	49.5456	-0.419573	1.73526e-07	69	-0.38514	1.47927e-10	1.09466e-08
175	ceRNA	EIF2C1	16.0808	12.5415	0.358634	2.76945e-05	395	-0.11982	8.38551e-12	3.34582e-09
176	ceRNA	EIF2C3	5.66183	4.27479	0.405416	0.00011676	77	-0.02656	1.02647e-06	8.10909e-05
177	ceRNA	EIF4E	12.9639	14.7254	-0.183805	0.000687289	56	-0.44687	2.38578e-10	1.40761e-08
178	ceRNA	ELF1	29.2552	48.0741	-0.716564	6.90546e-15	62	-0.25488	1.36728e-07	8.47711e-06
179	ceRNA	ELF2	22.1806	25.9381	-0.225776	3.35187e-05	87	-0.37466	9.29858e-11	9.01963e-09
180	ceRNA	ELK3	15.7706	21.2762	-0.432	7.38359e-06	678	-0.04489	1.6589e-10	1.14796e-07
181	ceRNA	EPHA3	0.663792	2.65873	-2.00193	4.21108e-12	68	-0.92301	2.2946e-07	2.5929e-05
182	ceRNA	EPS8	20.7853	29.3482	-0.497706	7.91042e-08	42	-0.3868	1.08247e-06	4.65462e-05
183	ceRNA	ERBB2IP	22.2009	35.3055	-0.669277	9.52503e-20	454	-0.32362	4.36282e-29	2.17705e-26
184	ceRNA	FAM120A	94.3991	134.317	-0.508796	5.38058e-15	243	-0.37068	1.13641e-18	2.98876e-16
185	ceRNA	FAM122B	19.7105	24.5422	-0.316295	0.000818505	55	-0.30572	1.27095e-08	6.99025e-07
186	ceRNA	FAM135A	7.26362	3.46393	1.06828	1.56272e-20	251	0.35982	4.33214e-11	1.1047e-08
187	ceRNA	FAM13B	8.14702	15.0465	-0.885084	5.83089e-19	295	-0.34539	1.7357e-25	5.43274e-23
188	ceRNA	FAM168B	50.5236	39.4766	0.355959	0.000857607	112	0.01255	6.14299e-08	7.24873e-06
189	ceRNA	FAM178A	9.78639	13.0498	-0.415174	8.4125e-08	184	-0.37706	3.29931e-14	6.59861e-12
190	ceRNA	FAM179B	4.25083	9.26331	-1.12378	5.5468e-24	576	-0.40088	2.26203e-29	1.47484e-26
191	ceRNA	FAM196A	0.237885	6.20341	-4.70472	3.01232e-18	23	-1.92782	4.35411e-09	1.74164e-07
192	ceRNA	FAM208A	17.4062	22.9046	-0.396035	6.79324e-10	66	-0.32176	5.45356e-07	3.65388e-05
193	ceRNA	FAM49A	10.7412	4.16616	1.36637	1.18072e-18	28	0.93609	2.08704e-06	8.13945e-05
194	ceRNA	FAM60A	74.1838	33.2709	1.15684	8.33707e-21	129	0.36025	2.83299e-09	3.90953e-07
195	ceRNA	FAM63B	2.95516	5.13039	-0.795835	5.46147e-11	145	-0.26566	4.79897e-12	7.4864e-10
196	ceRNA	FAR1	17.7541	30.854	-0.797301	7.76058e-12	118	-0.41947	2.15209e-17	2.58251e-15
197	ceRNA	FBXL17	5.84286	12.0286	-1.04172	6.27454e-23	214	-0.42468	9.33073e-15	2.13674e-12
198	ceRNA	FBXL3	22.9547	36.4963	-0.668965	8.60586e-12	112	-0.2509	1.0062e-11	1.137e-09
199	ceRNA	FBXO21	21.5679	29.1216	-0.433203	1.20217e-11	92	-0.35669	3.00944e-11	2.76868e-09
200	ceRNA	FBXO38	11.2261	20.4683	-0.866536	1.63014e-24	64	-0.22722	2.58272e-07	1.67877e-05
201	ceRNA	FBXW11	19.9937	27.4942	-0.459582	2.76541e-09	298	-0.27832	3.59904e-21	1.10491e-18
202	ceRNA	FCHO2	10.221	16.7993	-0.716857	9.55731e-17	212	-0.34363	1.69492e-14	3.94917e-12
203	ceRNA	FEM1C	9.14266	15.9526	-0.803109	3.84521e-21	190	-0.32422	3.85671e-14	7.98339e-12
204	ceRNA	FNDC3A	15.9684	21.2927	-0.415139	2.9414e-06	454	-0.3393	9.2521e-20	4.79259e-17
205	ceRNA	FNDC3B	45.0599	23.913	0.914052	3.61336e-15	609	0.21999	1.08678e-17	6.9228e-15
206	ceRNA	FNIP1	6.59687	15.0683	-1.19166	1.03712e-27	146	-0.47399	7.97962e-10	1.30068e-07
207	ceRNA	FRMD6	19.7473	40.6189	-1.0405	3.9077e-14	333	-0.12104	1.99169e-08	6.85141e-06
208	ceRNA	FRS2	9.68729	27.2267	-1.49086	3.87561e-24	671	-0.46967	3.91598e-35	2.95656e-32
209	ceRNA	FRYL	18.1157	27.5147	-0.602961	9.00321e-12	278	-0.36109	1.06545e-25	3.12177e-23
210	ceRNA	FUBP3	29.1251	36.2424	-0.315415	2.56044e-08	431	-0.30195	3.58982e-38	1.63696e-35
211	ceRNA	G3BP2	62.5537	79.3252	-0.342684	3.73128e-07	362	-0.30096	5.22788e-26	2.05978e-23
212	ceRNA	GAB1	6.74599	10.6005	-0.652027	2.52545e-10	30	-0.2849	2.98143e-06	9.24242e-05
213	ceRNA	GALNT7	17.703	65.4675	-1.88679	1.39615e-32	89	-1.16998	5.37054e-15	7.9484e-13
214	ceRNA	GAN	1.98349	1.24535	0.671494	0.000129273	133	-0.02035	6.49458e-07	8.76769e-05
215	ceRNA	GATAD2B	21.3051	17.0979	0.317382	0.0009567	201	-0.17889	4.76448e-09	9.6719e-07
216	ceRNA	GCC2	9.63741	14.5602	-0.595313	1.29933e-10	178	-0.36961	5.06173e-20	9.46544e-18
217	ceRNA	GIGYF2	19.3599	27.8385	-0.524011	1.76317e-11	87	-0.42911	5.44037e-12	5.33156e-10
218	ceRNA	GIT2	20.7516	23.8565	-0.20116	0.000114136	237	-0.03281	4.06886e-09	9.6432e-07
219	ceRNA	GLCCI1	5.00547	10.4571	-1.0629	5.23915e-18	141	-0.53708	1.31786e-12	2.30625e-10
220	ceRNA	GLCE	17.3923	30.0174	-0.787347	2.58391e-09	79	-0.37515	3.43733e-09	2.81861e-07
221	ceRNA	GLUD2	11.6572	20.7886	-0.834566	1.19798e-16	32	-0.4122	8.35653e-07	2.84122e-05
222	ceRNA	GMFB	28.5316	36.723	-0.364121	9.36619e-08	417	-0.25435	3.81979e-27	1.66161e-24
223	ceRNA	GNPDA2	10.0905	15.8249	-0.649205	1.55786e-15	186	-0.36428	1.33775e-20	2.56848e-18
224	ceRNA	GOLGA1	8.95104	15.6285	-0.804056	1.38624e-24	222	-0.3436	5.40784e-16	1.31411e-13
225	ceRNA	GOLT1B	40.9406	25.9796	0.656152	3.8671e-06	108	0.02183	5.5897e-07	6.42816e-05
226	ceRNA	GPBP1	56.0876	75.5792	-0.430309	1.19315e-14	70	-0.44279	2.72515e-10	1.93485e-08
227	ceRNA	GPD2	24.9933	33.2964	-0.413826	5.24439e-05	35	-0.47112	5.0406e-08	1.91543e-06
228	ceRNA	GPM6A	0.347149	5.63327	-4.02035	4.00138e-05	47	-0.93871	1.49728e-06	8.98366e-05
229	ceRNA	GXYLT1	6.89027	7.87456	-0.192639	0.000114136	158	-0.31954	1.28067e-13	2.16433e-11
230	ceRNA	HBP1	55.7731	75.3572	-0.434175	1.16688e-09	340	-0.28271	1.01296e-19	3.66692e-17
231	ceRNA	HCFC2	4.14482	5.17607	-0.320546	2.3219e-05	237	-0.25788	9.33427e-15	2.3149e-12
232	ceRNA	HDAC9	6.45196	3.42888	0.912	0.000141982	179	0.09084	2.78713e-07	5.04471e-05
233	ceRNA	HEATR5A	8.85706	12.3737	-0.482375	1.05882e-06	71	-0.24884	6.38824e-08	4.85506e-06
234	ceRNA	HECTD1	46.2378	61.1717	-0.403791	4.36007e-08	166	-0.32636	1.93283e-15	3.4211e-13
235	ceRNA	HECTD2	4.27422	8.81872	-1.04491	6.89896e-18	350	-0.47121	3.40524e-33	1.25313e-30
236	ceRNA	HERC1	12.0085	15.7352	-0.389935	0.000145199	65	-0.29441	2.86651e-08	1.92056e-06
237	ceRNA	HIPK1	22.6466	27.7434	-0.292849	0.000108234	288	-0.27466	1.00553e-25	2.99649e-23
238	ceRNA	HMBOX1	2.8546	4.14363	-0.537607	0.000146836	287	-0.2729	7.16627e-27	2.17138e-24
239	ceRNA	HNRNPH2	79.5368	131.248	-0.722596	3.25372e-23	142	-0.43977	1.38236e-12	2.11501e-10
240	ceRNA	HNRNPK	388.464	441.153	-0.183497	2.3773e-06	117	-0.30717	4.33663e-14	5.24732e-12
241	ceRNA	HNRPLL	26.9855	20.0268	0.430253	1.86582e-06	148	-0.03506	1.28853e-08	1.94569e-06
242	ceRNA	HOOK1	12.9486	17.3156	-0.419275	3.11626e-05	40	-0.25863	7.53986e-08	3.01594e-06
243	ceRNA	HS2ST1	17.4811	14.2003	0.299868	0.000526674	124	-0.04145	4.53065e-07	5.70861e-05
244	ceRNA	IDE	15.6482	21.4366	-0.45408	2.15928e-08	61	-0.29835	3.40354e-07	2.14423e-05
245	ceRNA	IKZF4	3.05988	4.50435	-0.557841	9.54048e-12	157	-0.51511	1.81939e-19	3.16573e-17
246	ceRNA	INO80	9.55658	12.236	-0.356562	1.56189e-07	256	-0.21179	1.4914e-19	3.87763e-17
247	ceRNA	INTS2	4.84945	7.1155	-0.553144	3.66532e-06	183	-0.28202	3.10814e-18	5.96762e-16
248	ceRNA	INTS6	9.89899	11.9281	-0.269015	8.50625e-05	123	-0.19966	5.23045e-16	6.59036e-14
249	ceRNA	IPO11	15.5801	22.6383	-0.539057	3.36109e-17	65	-0.27555	1.34591e-09	8.883e-08
250	ceRNA	IPO5	77.4047	52.6054	0.55721	6.71597e-05	105	0.02471	1.50548e-07	1.59581e-05
251	ceRNA	IQSEC1	16.8182	24.2661	-0.528915	5.06395e-10	121	-0.27171	6.53896e-15	7.91214e-13
252	ceRNA	IRF2BPL	22.9759	33.8067	-0.55719	4.06894e-10	112	-0.50839	8.70227e-14	1.07908e-11
253	ceRNA	IRS1	5.26059	15.4542	-1.5547	1.49619e-20	64	-0.78498	3.40182e-11	2.38128e-09
254	ceRNA	ITGA6	115.37	39.0643	1.56234	2.37479e-11	84	0.35298	5.672e-07	4.76448e-05
255	ceRNA	ITPR1	9.64449	36.3481	-1.9141	1.51138e-26	156	-0.53728	9.38388e-11	1.62341e-08
256	ceRNA	KANK1	33.6564	16.6618	1.01434	1.99345e-14	7	2.27372	7.58854e-06	6.82969e-05
257	ceRNA	KANSL1	18.9712	23.0202	-0.279092	0.00018546	150	-0.27415	1.82304e-15	2.8804e-13
258	ceRNA	KAT6A	17.5447	24.6161	-0.488564	0.000336691	321	-0.24267	2.29517e-23	7.61996e-21
259	ceRNA	KAT6B	7.49264	25.8615	-1.78726	6.07048e-31	282	-0.54212	1.7064e-15	5.6311e-13
260	ceRNA	KBTBD8	1.36118	0.88118	0.627346	3.56116e-05	148	0.62279	4.74727e-11	8.92487e-09
261	ceRNA	KCNJ3	0.369516	26.4368	-6.16077	1.38731e-23	39	-1.63896	4.66016e-15	2.42328e-13
262	ceRNA	KDM6A	12.499	17.5095	-0.486324	3.70596e-09	287	-0.30476	1.44257e-23	4.371e-21
263	ceRNA	KIAA0226L	5.28907	2.09244	1.33783	8.40748e-19	16	1.05346	7.72646e-07	1.54529e-05
264	ceRNA	KIAA0494	49.1731	73.6139	-0.582109	8.91827e-15	224	-0.20946	2.54903e-12	5.96473e-10
265	ceRNA	KIAA0528	18.3055	21.1598	-0.209049	0.000144119	67	-0.21343	2.26087e-09	1.53739e-07
266	ceRNA	KIAA1109	20.3082	30.381	-0.581108	1.07542e-10	113	-0.29731	2.18782e-13	2.55975e-11
267	ceRNA	KIAA1598	28.799	48.362	-0.747854	3.41467e-17	86	-0.41096	1.81661e-12	1.70761e-10
268	ceRNA	KIF13A	23.8499	33.318	-0.482318	1.79707e-07	155	-0.23354	3.45356e-13	5.49116e-11
269	ceRNA	KIF16B	10.2904	29.2824	-1.50873	3.62551e-29	74	-0.8809	6.1245e-14	4.96085e-12
270	ceRNA	KIF23	28.9234	15.8208	0.870416	2.9539e-12	125	0.12919	3.23813e-10	4.08005e-08
271	ceRNA	KIF3B	22.6193	37.9431	-0.746282	4.56374e-18	93	-0.43225	8.47031e-11	8.2162e-09
272	ceRNA	KLF11	19.5192	11.3472	0.78255	5.73241e-13	124	0.16921	1.90899e-09	2.44351e-07
273	ceRNA	KLF5	42.8955	11.4314	1.90782	1.34671e-24	72	1.55219	4.51867e-11	6.91356e-09
274	ceRNA	KLHL15	4.91955	3.8757	0.344068	0.000247426	483	-0.09644	1.61254e-12	7.99819e-10
275	ceRNA	KLHL28	3.82103	6.60991	-0.790668	2.15801e-16	235	-0.34907	1.02643e-17	2.6174e-15
276	ceRNA	KPNA1	22.2762	25.4166	-0.190265	0.000236039	77	-0.25492	2.80339e-07	2.15861e-05
277	ceRNA	KPNA4	57.9176	45.9101	0.33519	8.60547e-07	442	-0.02042	5.58153e-20	2.4782e-17
278	ceRNA	KTN1	97.7041	149.352	-0.612229	3.0044e-16	76	-0.43129	1.78595e-07	1.44662e-05
279	ceRNA	L2HGDH	5.18896	6.30808	-0.281758	0.000517675	46	-0.34154	4.66402e-08	2.14545e-06
280	ceRNA	LARP4	19.1164	29.2846	-0.615333	4.46634e-12	280	-0.33363	4.11932e-29	1.20284e-26
281	ceRNA	LARP4B	38.6965	26.3649	0.553586	2.46937e-09	242	-0.12141	5.67498e-09	1.42442e-06
282	ceRNA	LATS1	7.73063	10.0233	-0.374698	3.72236e-05	81	-0.26904	2.87537e-09	2.44407e-07
283	ceRNA	LBR	42.8959	18.0855	1.24601	8.63908e-28	141	0.70115	1.0522e-08	1.92553e-06
284	ceRNA	LCOR	1.94215	3.49632	-0.848181	4.97504e-10	1042	-0.33837	6.16289e-61	7.13046e-58
285	ceRNA	LIMA1	31.8371	81.8741	-1.3627	2.05649e-32	136	-0.21544	6.49099e-07	9.02247e-05
286	ceRNA	LMBRD2	4.13514	8.98537	-1.11964	1.58136e-15	31	-0.40376	3.64194e-08	1.129e-06
287	ceRNA	LMLN	3.27695	5.32538	-0.700531	9.18202e-15	102	-0.3079	8.30687e-11	8.63915e-09
288	ceRNA	LPGAT1	24.3344	30.9215	-0.345612	0.000127344	80	-0.40845	8.67444e-11	7.72025e-09
289	ceRNA	LRP12	13.2897	6.62346	1.00465	1.41413e-12	340	0.19065	4.76582e-10	1.67757e-07
290	ceRNA	LRP6	18.333	9.17575	0.998545	3.85e-06	310	-0.1368	9.36031e-09	2.93914e-06
291	ceRNA	LRRC1	24.0102	27.39	-0.189997	0.000486466	52	-0.35179	4.81299e-08	2.74341e-06
292	ceRNA	LSM14A	105.512	76.1857	0.469811	8.70273e-09	176	-0.05119	4.98785e-08	9.02801e-06
293	ceRNA	LYSMD3	8.60117	13.9944	-0.702244	4.64726e-16	244	-0.16316	1.04884e-11	2.70599e-09
294	ceRNA	MAGI1	7.84093	10.2467	-0.386064	0.000794224	425	-0.33534	1.34259e-30	6.18932e-28
295	ceRNA	MAGI3	11.5179	24.2619	-1.07482	3.9103e-18	68	-0.62285	3.56275e-08	2.63643e-06
296	ceRNA	MAML1	19.1356	21.7092	-0.182048	0.000517675	323	-0.27058	5.50927e-21	1.91722e-18
297	ceRNA	MAML3	2.75851	5.38552	-0.965195	3.52593e-20	59	-0.56402	2.65578e-07	1.80593e-05
298	ceRNA	MAP2K4	15.1318	26.1059	-0.786791	2.97331e-12	105	-0.57751	1.13914e-09	1.54923e-07
299	ceRNA	MAP3K1	11.8299	26.7584	-1.17755	3.12996e-17	565	-0.40191	1.72673e-29	1.0982e-26
300	ceRNA	MAP4K3	16.2286	21.1192	-0.380016	2.22948e-08	204	-0.36606	1.29387e-20	2.87238e-18
301	ceRNA	MAP4K4	53.0304	29.9539	0.824074	4.82754e-16	213	0.66178	5.13739e-10	1.51553e-07
302	ceRNA	MARCH5	24.972	28.7484	-0.203175	2.16468e-05	66	-0.36589	9.39473e-09	6.85815e-07
303	ceRNA	MARCH6	38.287	52.9085	-0.466646	3.55354e-07	222	-0.27723	6.81743e-20	1.60891e-17
304	ceRNA	MARCH8	8.08049	14.7669	-0.86985	2.74976e-09	197	-0.31742	9.65756e-17	2.03775e-14
305	ceRNA	MAST4	6.24779	22.5018	-1.84862	4.92798e-27	169	-0.79901	2.16976e-09	5.27252e-07
306	ceRNA	MAT2B	52.2847	63.8505	-0.28831	1.09682e-05	147	-0.23	3.82956e-07	6.43367e-05
307	ceRNA	MATR3	154.966	199.865	-0.367075	1.64393e-11	172	-0.30128	1.11462e-14	2.05089e-12
308	ceRNA	MBD5	6.51199	8.04121	-0.304314	1.81862e-05	106	-0.27591	1.00314e-13	1.09342e-11
309	ceRNA	MBNL1	61.6053	48.5484	0.343631	0.000138311	414	0.09868	6.11835e-11	2.63701e-08
310	ceRNA	MBNL3	3.38106	2.4212	0.481751	0.000242105	105	0.12177	9.5439e-09	1.00211e-06
311	ceRNA	MBTPS2	11.5066	17.2305	-0.582505	2.83339e-11	100	-0.35827	6.11884e-13	6.42478e-11
312	ceRNA	MED1	24.3432	41.196	-0.758989	1.888e-05	59	-0.26712	9.15112e-07	5.58218e-05
313	ceRNA	MED12L	0.341271	0.494476	-0.534983	5.87914e-05	66	-0.3649	1.31132e-07	8.65474e-06
314	ceRNA	MED13	17.1479	24.146	-0.493749	2.90181e-06	402	-0.31072	1.8189e-27	7.58481e-25
315	ceRNA	MED13L	19.8249	40.6844	-1.03716	4.78301e-15	215	-0.42855	1.55254e-14	3.69504e-12
316	ceRNA	MEX3B	4.65567	2.37909	0.968577	8.79853e-09	190	0.6597	9.67285e-11	2.47625e-08
317	ceRNA	MEX3C	32.6956	23.2554	0.491528	1.8889e-08	263	0.03932	3.25451e-09	8.94991e-07
318	ceRNA	MGEA5	65.5527	92.2558	-0.492984	2.79544e-13	153	-0.26343	1.90098e-11	2.98454e-09
319	ceRNA	MIER3	7.37148	12.9601	-0.814049	4.46384e-19	833	-0.36324	6.74672e-47	6.25421e-44
320	ceRNA	MKL2	12.1645	31.5846	-1.37655	1.60346e-26	375	-0.51187	1.956e-20	8.23475e-18
321	ceRNA	MLL2	15.8178	11.6644	0.439428	3.3249e-05	185	0.00528	2.5634e-09	5.10116e-07
322	ceRNA	MLL3	22.3378	27.8013	-0.315664	1.52566e-05	442	-0.26254	8.12324e-30	3.84229e-27
323	ceRNA	MOB3B	7.95265	2.38284	1.73876	5.58419e-26	54	1.09319	1.9822e-07	1.72452e-05
324	ceRNA	MSL1	70.8256	130.464	-0.881307	2.32194e-10	81	-0.30545	8.45919e-10	7.10572e-08
325	ceRNA	MTF2	15.0722	10.9493	0.461053	1.85884e-08	312	-0.01918	5.73793e-16	1.79597e-13
326	ceRNA	MTMR9	3.26801	4.91814	-0.589698	4.12742e-11	81	-0.31672	3.70177e-07	3.25756e-05
327	ceRNA	MYB	16.6508	60.2285	-1.85485	1.08232e-29	81	-1.55443	1.68267e-08	3.09612e-06
328	ceRNA	MYEF2	7.4289	10.5816	-0.510334	3.58839e-07	43	-0.40591	1.72902e-07	8.47222e-06
329	ceRNA	MYLIP	17.7914	31.7726	-0.836599	6.67964e-18	78	-0.23017	4.5767e-09	3.61559e-07
330	ceRNA	NAA30	10.8262	14.902	-0.460982	3.01738e-11	315	-0.27343	1.52206e-26	4.96193e-24
331	ceRNA	NAA50	110.864	82.493	0.426453	2.72883e-08	137	-0.10474	6.17227e-07	8.51773e-05
332	ceRNA	NAB1	25.8602	16.267	0.668782	4.17923e-11	171	0.22722	2.51544e-07	4.77933e-05
333	ceRNA	NBEA	2.22266	6.3019	-1.5035	1.30828e-22	445	-0.46838	4.59043e-18	2.37784e-15
334	ceRNA	NBR1	45.9745	78.852	-0.778314	4.19342e-17	66	-0.44808	7.13906e-12	5.14013e-10
335	ceRNA	NCK2	66.1765	29.6829	1.15669	8.28716e-33	48	1.34658	4.03505e-08	3.18769e-06
336	ceRNA	NCOA1	21.6064	25.6454	-0.247243	6.09042e-05	131	-0.37316	5.7087e-13	8.27762e-11
337	ceRNA	NCOA2	15.0635	20.5595	-0.448747	0.000742703	65	-0.35556	5.51061e-07	4.29828e-05
338	ceRNA	NCOA3	15.189	22.2196	-0.54881	1.69235e-07	374	-0.18046	8.5806e-19	3.27779e-16
339	ceRNA	NEDD4	4.46354	8.18782	-0.87529	5.49502e-16	216	-0.18976	7.66143e-08	1.7085e-05
340	ceRNA	NEDD4L	12.7992	21.7292	-0.763586	2.36419e-10	24	-1.18679	5.65708e-07	1.7537e-05
341	ceRNA	NEK9	22.6188	40.5312	-0.841509	3.21132e-26	283	-0.31264	6.16106e-08	1.9777e-05
342	ceRNA	NF1	17.615	25.0276	-0.506715	3.33088e-09	286	-0.36329	6.00153e-30	1.79446e-27
343	ceRNA	NFATC3	22.4406	18.4731	0.280686	0.000262138	197	-0.07806	1.79533e-11	3.53679e-09
344	ceRNA	NIPBL	23.0267	26.8311	-0.220601	0.000266904	208	-0.30387	1.17009e-15	2.64441e-13
345	ceRNA	NLK	11.0447	16.9906	-0.621384	3.19678e-12	236	-0.57559	5.37812e-24	1.46285e-21
346	ceRNA	NOVA1	0.848594	15.1616	-4.1592	1.15518e-23	116	-1.65355	2.25019e-09	6.39053e-07
347	ceRNA	NPC1	30.4514	21.2326	0.520227	2.38683e-09	148	-0.13406	6.13913e-07	9.33148e-05
348	ceRNA	NPTN	79.999	123.112	-0.621912	5.17059e-16	126	-0.48759	4.03001e-15	5.72261e-13
349	ceRNA	NRBF2	28.3989	20.8149	0.448222	5.42789e-11	168	0.23979	1.59372e-09	2.69339e-07
350	ceRNA	NRIP1	13.6768	40.2664	-1.55785	8.43007e-26	146	-0.41236	2.05881e-14	3.27352e-12
351	ceRNA	NUFIP2	21.1875	27.6061	-0.381771	1.11566e-05	685	-0.30372	2.24724e-55	1.64948e-52
352	ceRNA	NUMB	37.0174	43.3995	-0.229473	4.31708e-05	61	-0.32724	1.24452e-07	7.59156e-06
353	ceRNA	NUS1	34.3262	22.7316	0.59461	3.1856e-13	118	0.28428	1.56434e-09	1.9085e-07
354	ceRNA	PAIP2	106.895	147.151	-0.461097	2.05434e-15	51	-0.67267	8.90931e-08	4.98921e-06
355	ceRNA	PALM2	1.89095	0.424704	2.15458	6.77505e-17	29	1.45993	6.33927e-07	3.4866e-05
356	ceRNA	PAN3	16.6332	21.5125	-0.371107	1.28891e-05	304	-0.32054	4.02915e-24	1.32559e-21
357	ceRNA	PAPD4	18.1326	26.869	-0.567358	2.657e-14	305	-0.34622	1.46657e-22	4.8397e-20
358	ceRNA	PAPD5	4.76073	6.98957	-0.554021	0.000752746	177	-0.20813	2.22069e-16	3.97503e-14
359	ceRNA	PARD6B	4.78468	23.7514	-2.31152	2.88391e-23	43	-1.3279	1.60241e-11	9.29396e-10
360	ceRNA	PCLO	3.11394	6.81058	-1.12904	4.90548e-14	30	-1.03701	5.59132e-07	1.84514e-05
361	ceRNA	PDCD6IP	44.7339	64.2948	-0.523335	3.34055e-14	49	-0.3255	3.00355e-07	1.50178e-05
362	ceRNA	PDE12	12.6998	15.6538	-0.3017	7.00851e-06	80	-0.42808	1.79616e-11	1.67043e-09
363	ceRNA	PDIK1L	8.33446	12.8283	-0.622169	5.26598e-14	495	-0.42835	4.41833e-50	2.28427e-47
364	ceRNA	PDS5A	38.8347	45.8372	-0.239174	0.000713288	410	-0.25773	3.29398e-28	1.42959e-25
365	ceRNA	PDS5B	10.8888	13.8935	-0.351571	6.31651e-07	408	-0.25221	3.53825e-26	1.54975e-23
366	ceRNA	PHC3	10.878	14.0926	-0.373522	3.78175e-06	110	-0.30588	8.79025e-15	9.84508e-13
367	ceRNA	PHF15	9.8483	20.8571	-1.08259	1.33566e-16	60	-0.56783	7.2158e-09	4.83459e-07
368	ceRNA	PHF2	21.7579	25.9448	-0.253908	9.8989e-06	151	-0.18219	3.26438e-17	4.96186e-15
369	ceRNA	PHF20	20.0835	29.8458	-0.571514	1.35949e-14	180	-0.32395	2.83453e-15	5.27224e-13
370	ceRNA	PHF6	23.217	18.0997	0.35922	0.000566073	343	-0.15207	3.26003e-13	1.13123e-10
371	ceRNA	PIK3C2A	15.223	21.475	-0.496406	5.09852e-08	385	-0.31446	4.41932e-31	1.83402e-28
372	ceRNA	PJA2	33.2948	59.996	-0.849571	6.88673e-20	293	-0.35102	8.59804e-16	2.83735e-13
373	ceRNA	PLDN	21.7151	27.9202	-0.362608	3.98584e-09	56	-0.20195	1.54163e-07	8.63315e-06
374	ceRNA	PLEKHA3	11.4449	13.9702	-0.287652	8.76968e-07	252	-0.32288	3.12409e-25	8.06015e-23
375	ceRNA	POLK	6.60715	11.7436	-0.829774	4.28093e-19	36	-0.44485	1.81879e-11	6.72953e-10
376	ceRNA	POLQ	3.0515	1.81431	0.750099	4.20524e-11	55	0.1218	4.02781e-07	2.2153e-05
377	ceRNA	PPARGC1A	2.84706	0.410646	2.79351	5.98864e-08	62	1.60144	1.31571e-08	2.43406e-06
378	ceRNA	PPARGC1B	0.957133	0.457792	1.06403	1.20771e-10	96	0.15872	4.26879e-07	4.09804e-05
379	ceRNA	PPIP5K2	16.544	22.661	-0.453899	7.24515e-10	70	-0.33455	6.80642e-10	4.83256e-08
380	ceRNA	PPM1A	15.4541	24.9317	-0.689992	5.63978e-19	379	-0.41606	2.98873e-24	1.25228e-21
381	ceRNA	PPP1R15B	30.541	37.3688	-0.291087	6.91787e-06	193	-0.16669	1.30516e-10	2.54506e-08
382	ceRNA	PPP1R2	31.9499	38.2218	-0.258587	3.06611e-05	46	-0.41327	3.2085e-08	1.66842e-06
383	ceRNA	PPP2R5A	61.0096	77.0261	-0.33631	8.36978e-08	24	-0.48363	9.4941e-07	2.37353e-05
384	ceRNA	PPP2R5E	25.4523	30.4001	-0.25628	8.94238e-05	284	-0.29522	2.86238e-33	8.38676e-31
385	ceRNA	PPP3R1	61.0258	51.2181	0.252767	4.55837e-06	443	0.00091	8.30177e-23	3.7441e-20
386	ceRNA	PPP4R2	34.6934	40.7589	-0.232451	0.00068266	115	-0.20131	1.12898e-13	1.29833e-11
387	ceRNA	PPP6C	32.0088	44.2989	-0.468802	1.01588e-17	381	-0.40158	1.20008e-30	4.90834e-28
388	ceRNA	PPP6R3	44.3968	59.7124	-0.427574	1.37538e-06	157	-0.2702	1.5498e-17	2.54167e-15
389	ceRNA	PRDM10	3.32399	4.03936	-0.28121	1.23549e-05	247	-0.24835	1.2193e-19	3.21895e-17
390	ceRNA	PRDM4	21.2065	27.3567	-0.367392	3.14782e-08	45	-0.33499	7.11807e-07	3.3455e-05
391	ceRNA	PRKAR1A	117.719	180.876	-0.619651	2.09455e-12	139	-0.34038	3.88338e-12	5.78623e-10
392	ceRNA	PRPF39	14.715	18.2654	-0.311823	1.75902e-05	69	-0.23981	1.89901e-08	1.36729e-06
393	ceRNA	PRSS12	12.4475	0.493223	4.65747	6.31343e-17	6	1.47854	4.41383e-06	2.6483e-05
394	ceRNA	PSEN1	23.5793	36.0425	-0.612178	1.23053e-18	63	-0.34359	5.60558e-07	3.58757e-05
395	ceRNA	PTCH1	4.23021	1.77956	1.24921	7.18344e-18	41	0.99478	5.13372e-07	2.77221e-05
396	ceRNA	PTEN	23.5657	33.9711	-0.527618	2.06696e-12	505	-0.36563	3.84527e-16	2.31101e-13
397	ceRNA	PTGES3	300.078	367.62	-0.292878	6.88357e-07	85	-0.27971	2.18043e-08	1.87517e-06
398	ceRNA	PTPN12	80.4164	67.4544	0.253576	0.000397422	182	-0.03461	1.18439e-08	2.22665e-06
399	ceRNA	PTPN13	5.97823	13.1723	-1.13971	2.18746e-11	125	-0.35693	2.00902e-13	2.77244e-11
400	ceRNA	PTPN2	43.4818	26.3334	0.723517	2.23069e-20	155	0.68761	5.97843e-09	1.22558e-06
401	ceRNA	PTPN4	8.23903	6.6571	0.307581	2.07708e-05	166	-0.05931	8.96597e-10	1.48835e-07
402	ceRNA	PTPRG	7.03764	11.4164	-0.697949	4.29213e-08	145	-0.29449	4.81282e-08	7.45987e-06
403	ceRNA	PTPRZ1	7.04646	1.13976	2.62817	7.48295e-09	9	1.86687	2.17409e-06	2.82632e-05
404	ceRNA	PURA	8.2238	12.1049	-0.557713	5.53363e-14	389	-0.37725	8.74461e-25	3.75144e-22
405	ceRNA	PWWP2A	7.56381	10.6118	-0.488479	3.5068e-13	233	-0.35029	5.71251e-14	1.39956e-11
406	ceRNA	QSER1	18.4985	12.6201	0.551689	3.87498e-05	274	-0.11028	7.48702e-12	2.05144e-09
407	ceRNA	R3HDM1	25.6681	17.6651	0.53908	1.89075e-11	122	0.08767	1.89635e-09	2.3894e-07
408	ceRNA	RAB11A	115.594	182.681	-0.660257	4.22451e-20	61	-0.5264	1.67501e-09	1.03851e-07
409	ceRNA	RAB11FIP2	4.78816	5.8159	-0.280532	6.58619e-05	130	-0.22051	8.04873e-09	1.07048e-06
410	ceRNA	RAB14	50.4443	67.2289	-0.414389	2.38991e-11	136	-0.37328	3.19594e-12	4.66607e-10
411	ceRNA	RAB5A	47.8855	53.7024	-0.165397	0.000213174	105	-0.27581	6.25953e-15	6.6351e-13
412	ceRNA	RABEP1	21.9067	80.9487	-1.88564	1.25928e-36	199	-0.45073	1.40303e-13	3.07264e-11
413	ceRNA	RAD23B	133.239	149.832	-0.169333	0.000500124	189	-0.28774	2.30638e-17	4.61276e-15
414	ceRNA	RALGPS1	3.43458	6.60123	-0.942601	1.90409e-18	53	-0.68423	8.33993e-08	5.17076e-06
415	ceRNA	RAP1B	84.22	105.21	-0.321037	6.63776e-05	241	-0.35439	2.48353e-19	6.45718e-17
416	ceRNA	RAP2B	18.7415	10.8488	0.788701	3.81124e-21	20	1.18439	1.32545e-06	3.31362e-05
417	ceRNA	RAP2C	21.8964	36.9704	-0.755679	3.05818e-10	296	-0.35448	2.2423e-19	7.30989e-17
418	ceRNA	RAPGEF4	2.81473	5.11273	-0.861098	4.48213e-09	89	-0.61634	9.71183e-12	9.71183e-10
419	ceRNA	RASA1	17.1115	29.5308	-0.787257	1.86436e-15	248	-0.35824	2.26192e-15	6.26553e-13
420	ceRNA	RB1	13.9782	23.5195	-0.750681	2.38554e-16	169	-0.30541	1.20948e-09	2.27382e-07
421	ceRNA	RBL2	26.0725	36.3847	-0.480803	4.56994e-08	258	-0.26791	5.13914e-14	1.39785e-11
422	ceRNA	RBM12	24.6701	29.5212	-0.258985	2.12121e-06	307	-0.28764	2.25671e-23	6.9958e-21
423	ceRNA	RBM24	1.24205	12.0886	-3.28285	9.664e-12	44	-1.62005	3.40914e-11	2.28412e-09
424	ceRNA	RBM27	12.4404	16.0009	-0.363113	1.55885e-06	358	-0.33059	1.40562e-30	5.34137e-28
425	ceRNA	RBM47	23.3918	59.3732	-1.34381	7.7479e-33	123	-0.71451	4.41007e-09	6.79151e-07
426	ceRNA	RBM5	38.7974	56.3322	-0.538001	1.46577e-11	68	-0.45705	2.56407e-07	1.87177e-05
427	ceRNA	RCOR3	22.4874	34.8023	-0.630065	4.58025e-10	223	-0.41418	1.26088e-16	2.95047e-14
428	ceRNA	REEP1	1.7131	12.0546	-2.81491	2.53835e-33	58	-1.49957	3.89877e-14	3.66484e-12
429	ceRNA	RELL1	13.8638	22.6494	-0.70815	9.92299e-09	21	-0.91923	2.60745e-06	7.04011e-05
430	ceRNA	REST	9.81613	12.567	-0.356416	0.000287812	287	-0.2255	5.55438e-18	1.66631e-15
431	ceRNA	REV3L	18.3357	13.6836	0.4222	0.000507077	429	-0.05803	8.53142e-21	3.67704e-18
432	ceRNA	RFX7	5.81434	8.43296	-0.536425	1.89022e-09	500	-0.35022	8.90076e-28	5.00223e-25
433	ceRNA	RHOT1	21.311	28.7088	-0.429893	3.48394e-09	131	-0.3385	1.05972e-13	1.5048e-11
434	ceRNA	RIC8B	6.52596	8.0157	-0.296637	2.87295e-05	73	-0.35658	4.71839e-11	3.49161e-09
435	ceRNA	RICTOR	6.64076	8.57663	-0.369063	0.000204776	384	-0.27532	7.34015e-26	3.08286e-23
436	ceRNA	RNF11	58.8974	69.9496	-0.248112	4.49833e-06	119	-0.21156	1.903e-10	2.32166e-08
437	ceRNA	RNF111	9.75467	12.6611	-0.376241	3.98873e-08	373	-0.30082	1.02083e-25	4.06291e-23
438	ceRNA	RNF138	23.1443	13.6264	0.764253	1.34054e-12	107	0.16931	8.79186e-09	9.4952e-07
439	ceRNA	RNF141	19.0684	35.958	-0.91513	3.78509e-18	30	-0.51646	2.57287e-07	7.71861e-06
440	ceRNA	RPS6KA5	3.53217	6.58183	-0.897933	2.89293e-15	199	-0.31331	1.1337e-16	2.31276e-14
441	ceRNA	RPS6KB1	13.8378	23.7384	-0.778608	5.69676e-10	429	-0.37015	1.47984e-33	6.85167e-31
442	ceRNA	RREB1	10.6367	15.6279	-0.55507	2.77618e-13	174	-0.30475	1.60676e-18	2.95643e-16
443	ceRNA	RSBN1L	13.1652	16.7185	-0.34471	6.97828e-06	241	-0.28395	1.1798e-24	2.9731e-22
444	ceRNA	RSRC2	53.2411	61.8962	-0.217311	9.94159e-06	103	-0.25912	3.11889e-11	3.21246e-09
445	ceRNA	RTF1	25.5469	37.6852	-0.560846	3.30141e-19	86	-0.38344	2.79399e-09	2.54253e-07
446	ceRNA	RUFY2	5.51887	7.72615	-0.485376	8.83387e-10	256	-0.23308	6.09879e-14	1.64667e-11
447	ceRNA	RYBP	24.4881	34.4161	-0.491006	6.93148e-13	434	-0.3405	3.63147e-34	1.69226e-31
448	ceRNA	SACM1L	20.056	26.4232	-0.397776	1.77504e-09	40	-0.41516	2.38053e-07	9.99821e-06
449	ceRNA	SAMD8	5.31918	9.8105	-0.883122	3.5284e-10	264	-0.29704	7.95112e-16	2.32968e-13
450	ceRNA	SAP30L	10.249	16.2691	-0.666649	5.57921e-16	77	-0.23393	5.08438e-08	4.27088e-06
451	ceRNA	SCAF11	25.9304	34.2677	-0.402205	1.04242e-07	82	-0.26147	2.45396e-07	2.11041e-05
452	ceRNA	SCAF8	23.6427	27.3444	-0.209849	5.30696e-05	48	-0.18499	1.55917e-06	7.63995e-05
453	ceRNA	SCYL3	12.9064	17.6618	-0.452553	9.34433e-09	56	-0.57172	4.38655e-14	2.5442e-12
454	ceRNA	SEC24A	11.602	14.7599	-0.347316	6.21094e-05	299	-0.32264	9.4275e-19	2.95081e-16
455	ceRNA	SEC24B	21.2322	24.3913	-0.200111	7.81414e-05	90	-0.22254	3.94768e-10	3.55291e-08
456	ceRNA	SECISBP2L	12.2838	16.5711	-0.431916	1.78858e-05	191	-0.23625	1.52126e-12	3.04252e-10
457	ceRNA	SEMA6D	1.10534	3.12377	-1.4988	1.14805e-07	417	-0.47919	1.27738e-09	6.50185e-07
458	ceRNA	SERINC3	69.0597	107.034	-0.632149	2.39137e-12	161	-0.30542	1.72587e-12	2.95123e-10
459	ceRNA	SETBP1	3.28907	6.77972	-1.04355	5.56439e-10	58	-0.47479	7.30534e-08	4.67541e-06
460	ceRNA	SETD1B	10.3587	13.2838	-0.358821	8.59023e-06	212	-0.33543	1.24427e-25	2.78716e-23
461	ceRNA	SETD2	39.7854	46.168	-0.214654	1.1062e-05	79	-0.16959	3.37453e-09	2.66588e-07
462	ceRNA	SETD7	21.277	35.9693	-0.757468	1.02265e-15	194	-0.33588	6.69387e-20	1.36555e-17
463	ceRNA	SFMBT1	8.47759	10.7733	-0.345736	2.2559e-05	82	-0.44337	6.57802e-11	5.92021e-09
464	ceRNA	SHOC2	26.3337	40.5023	-0.621094	2.91458e-15	199	-0.39556	4.26791e-17	9.13333e-15
465	ceRNA	SIRT1	13.8903	18.2954	-0.397404	4.91606e-08	317	-0.41047	9.14458e-27	3.10916e-24
466	ceRNA	SIX4	5.37673	9.23187	-0.779894	2.18262e-05	95	-0.44562	1.17845e-16	1.22559e-14
467	ceRNA	SKI	40.7379	27.3737	0.57358	1.0087e-08	121	0.16472	1.21244e-07	1.4913e-05
468	ceRNA	SLAIN1	7.29596	2.33604	1.64303	9.23809e-12	42	1.68334	3.68419e-08	3.27893e-06
469	ceRNA	SLAIN2	16.8823	21.8525	-0.372289	7.25987e-09	184	-0.25334	7.51798e-19	1.41338e-16
470	ceRNA	SLC10A7	4.69247	5.48662	-0.225572	4.4393e-05	64	-0.40424	3.92049e-08	2.62673e-06
471	ceRNA	SLC12A2	36.6904	51.0766	-0.47726	5.39415e-11	109	-0.46021	2.22607e-16	2.55998e-14
472	ceRNA	SLC16A6	1.02967	23.2154	-4.49482	4.52407e-40	35	-1.28246	7.73212e-07	4.79391e-05
473	ceRNA	SLC22A5	5.52959	19.9997	-1.85473	1.87195e-37	41	-1.32838	4.07732e-11	2.60949e-09
474	ceRNA	SLC25A24	30.0922	42.0086	-0.481294	1.32518e-06	71	-0.32815	4.29934e-09	3.2245e-07
475	ceRNA	SLC30A5	37.4299	54.3629	-0.538432	1.07805e-15	34	-0.29178	2.55233e-06	8.93314e-05
476	ceRNA	SLC35F3	6.30865	1.03997	2.60079	1.2231e-07	11	1.9777	6.3648e-07	1.01837e-05
477	ceRNA	SLC35F5	22.3127	33.0948	-0.568739	7.8821e-13	166	-0.32987	1.37935e-13	2.45524e-11
478	ceRNA	SLC35G1	3.49097	1.6884	1.04797	8.47787e-19	8	1.31193	3.165e-06	2.532e-05
479	ceRNA	SLC38A2	68.5415	88.9292	-0.37568	2.15582e-05	259	-0.36225	8.2744e-34	2.20099e-31
480	ceRNA	SLC44A1	56.9442	77.3529	-0.441906	1.62514e-08	133	-0.4079	2.70882e-17	3.92779e-15
481	ceRNA	SLC4A7	7.7076	17.3289	-1.16882	2.16518e-12	184	-0.46862	1.04038e-21	2.10157e-19
482	ceRNA	SLC9A6	9.31138	4.30853	1.1118	7.87468e-25	196	0.37079	3.08377e-07	6.44508e-05
483	ceRNA	SLK	22.714	31.2509	-0.460313	1.31617e-07	72	-0.14272	5.69505e-08	4.15738e-06
484	ceRNA	SLMAP	24.0462	32.3768	-0.429148	1.42789e-08	228	-0.30976	1.72062e-19	4.21552e-17
485	ceRNA	SMAD1	22.5428	28.5939	-0.343038	1.59105e-05	240	-0.29572	8.05198e-22	2.0452e-19
486	ceRNA	SMAD5	14.0623	22.1458	-0.655206	1.80934e-15	261	-0.28566	4.60417e-17	1.30298e-14
487	ceRNA	SNRK	14.5327	18.6138	-0.357069	4.54603e-08	347	-0.31476	1.24911e-12	5.08386e-10
488	ceRNA	SNX13	10.9557	15.5326	-0.503616	2.90958e-09	347	-0.32826	6.07886e-26	2.28565e-23
489	ceRNA	SNX2	50.8621	68.3045	-0.425389	1.62662e-10	63	-0.40811	2.96893e-13	1.90011e-11
490	ceRNA	SNX9	28.7571	43.7272	-0.604615	9.92423e-19	125	-0.24415	1.74976e-07	2.2047e-05
491	ceRNA	SOCS4	6.91505	8.38452	-0.277989	3.26221e-06	74	-0.25158	4.86602e-07	3.89281e-05
492	ceRNA	SOCS6	12.5014	18.5688	-0.570795	1.38228e-08	245	-0.32742	5.75903e-26	1.46279e-23
493	ceRNA	SOGA1	9.87228	15.0495	-0.60826	1.0769e-08	55	-0.33337	5.15728e-09	2.83651e-07
494	ceRNA	SON	119.966	138.913	-0.211559	0.000323794	149	-0.23949	2.85647e-11	4.3704e-09
495	ceRNA	SORL1	16.5057	24.77	-0.585629	1.02736e-09	66	-0.25617	9.55623e-10	6.40267e-08
496	ceRNA	SOS1	21.1451	13.9485	0.600217	1.35587e-10	407	-0.01819	2.42277e-12	1.00545e-09
497	ceRNA	SOS2	25.0396	28.327	-0.177969	0.000671202	195	-0.2948	1.38798e-22	2.80372e-20
498	ceRNA	SP1	29.1485	40.7359	-0.482878	1.5486e-14	272	-0.38951	1.22479e-21	3.58863e-19
499	ceRNA	SP2	15.1143	18.12	-0.261671	5.87914e-05	69	-0.35524	7.05588e-08	4.93912e-06
500	ceRNA	SPOP	27.47	47.3757	-0.786288	4.01181e-20	54	-0.71208	4.0445e-09	2.54804e-07
501	ceRNA	SPOPL	11.3598	29.9752	-1.39983	3.09709e-30	427	-0.3807	9.78363e-17	4.88203e-14
502	ceRNA	SPTY2D1	14.0359	20.2241	-0.526953	1.14212e-11	300	-0.37579	2.41598e-28	8.16602e-26
503	ceRNA	SRCIN1	2.96916	9.64573	-1.69983	9.52503e-20	11	-1.83686	3.96772e-07	4.36449e-06
504	ceRNA	SREK1	20.9748	35.1018	-0.742888	1.48331e-20	189	-0.27347	4.58087e-17	9.20756e-15
505	ceRNA	SRGAP1	3.92428	6.77871	-0.788583	7.72585e-10	32	-0.47573	2.62244e-06	9.17855e-05
506	ceRNA	SRPK2	32.9877	43.5353	-0.40026	2.21018e-06	320	-0.31743	1.28637e-25	4.21928e-23
507	ceRNA	STARD3NL	29.5238	35.165	-0.252263	8.77734e-06	23	-0.43311	8.93619e-07	2.05532e-05
508	ceRNA	STC1	15.1335	50.3601	-1.73454	4.38666e-05	14	-0.89342	1.5663e-06	2.50609e-05
509	ceRNA	STK38	55.5716	29.0026	0.938166	1.25708e-20	74	0.14149	7.99585e-07	6.31672e-05
510	ceRNA	STK38L	42.6934	20.8516	1.03385	0.000123099	74	0.08444	1.1985e-06	8.8689e-05
511	ceRNA	STK39	16.3648	28.6298	-0.806927	1.12784e-15	65	-0.76462	1.05972e-08	7.84195e-07
512	ceRNA	STRBP	35.4361	41.672	-0.233861	2.13809e-05	169	-0.39105	4.3635e-21	7.54886e-19
513	ceRNA	STRN3	10.933	19.8716	-0.862024	4.00602e-22	196	-0.44123	6.33525e-16	1.34941e-13
514	ceRNA	STYX	10.1507	12.0776	-0.250746	9.11565e-05	191	-0.27408	3.98543e-19	8.01072e-17
515	ceRNA	SUCO	38.8845	45.7614	-0.234937	4.06595e-05	107	-0.36421	1.5082e-15	1.64394e-13
516	ceRNA	SYDE2	2.40251	6.24372	-1.37786	4.13678e-14	37	-0.40087	2.23558e-07	8.71877e-06
517	ceRNA	SYNCRIP	106.781	73.3668	0.541454	6.43007e-09	712	0.05257	5.58495e-28	4.10494e-25
518	ceRNA	SYT1	0.846113	17.34	-4.35711	1.62629e-19	91	-1.10964	2.49874e-11	3.3733e-09
519	ceRNA	TAB3	8.94236	13.9181	-0.638237	1.23443e-15	315	-0.35072	1.20593e-24	4.11223e-22
520	ceRNA	TAF4B	8.54417	2.40384	1.8296	1.79559e-28	68	0.85859	5.83347e-08	5.07512e-06
521	ceRNA	TAF5	5.00253	3.02817	0.724209	3.37695e-18	186	0.22268	5.064e-14	9.8748e-12
522	ceRNA	TANC2	6.96548	18.2668	-1.39093	1.39563e-20	142	-0.42198	1.05456e-09	1.65566e-07
523	ceRNA	TAOK1	8.68006	12.8143	-0.561974	4.26582e-05	132	-0.32497	1.18712e-10	1.69758e-08
524	ceRNA	TBC1D12	4.09883	7.02238	-0.776749	1.35092e-15	103	-0.45145	7.94351e-12	1.00883e-09
525	ceRNA	TBC1D15	21.7523	29.6761	-0.448136	8.58693e-08	234	-0.25355	6.73321e-18	1.61597e-15
526	ceRNA	TBC1D19	3.26374	5.02144	-0.621574	3.62192e-12	142	-0.31492	1.92998e-13	2.85637e-11
527	ceRNA	TCF12	31.1826	38.9385	-0.320455	8.99142e-08	105	-0.3538	1.23499e-07	1.34614e-05
528	ceRNA	TET1	2.68536	0.872391	1.62207	5.08905e-12	197	0.06035	4.25853e-09	8.60224e-07
529	ceRNA	TET3	11.4351	6.8968	0.729468	2.8128e-10	538	0.00573	6.01177e-21	3.34254e-18
530	ceRNA	TEX2	29.9484	43.1662	-0.527424	5.72461e-09	54	-0.42448	4.20582e-08	2.39732e-06
531	ceRNA	TGOLN2	73.0654	98.1606	-0.425955	4.13774e-08	58	-0.04864	1.50869e-07	8.75042e-06
532	ceRNA	TIA1	37.6755	29.6193	0.34709	0.000102621	212	0.01404	2.75853e-10	5.87566e-08
533	ceRNA	TJP1	22.2471	25.5548	-0.199973	0.000198868	171	-0.25783	2.32453e-11	4.41661e-09
534	ceRNA	TLK1	23.2928	27.1418	-0.22063	0.000210085	77	-0.21571	2.52712e-10	1.97116e-08
535	ceRNA	TM9SF3	77.768	90.2376	-0.214552	0.000122175	180	-0.25486	1.54767e-15	2.84772e-13
536	ceRNA	TMED7	39.748	72.7224	-0.871519	2.10293e-22	56	-0.57922	6.84445e-11	4.03822e-09
537	ceRNA	TMEFF1	7.17295	2.11426	1.76241	1.57593e-18	190	0.61281	1.24257e-12	3.06915e-10
538	ceRNA	TMEM161B	5.60429	10.2887	-0.876453	7.80225e-19	175	-0.57348	1.47725e-21	3.08745e-19
539	ceRNA	TMEM167B	43.4172	49.4482	-0.187652	0.000410158	37	-0.22963	2.27177e-06	8.40555e-05
540	ceRNA	TMEM57	22.189	32.446	-0.548193	3.52465e-17	55	-0.41013	1.50945e-08	8.90578e-07
541	ceRNA	TMEM87A	65.3874	89.0162	-0.445056	3.72228e-10	45	-0.48873	1.25559e-07	6.27796e-06
542	ceRNA	TMEM9B	55.8159	93.2093	-0.739798	1.8104e-23	63	-1.02671	5.35776e-07	5.94711e-05
543	ceRNA	TMF1	14.004	18.8158	-0.426102	3.82471e-08	81	-0.2564	3.6465e-12	2.95367e-10
544	ceRNA	TNFRSF21	55.4884	18.6982	1.56928	1.46726e-24	37	1.43255	8.26715e-08	5.70433e-06
545	ceRNA	TNKS2	18.804	24.8502	-0.402217	2.44312e-06	276	-0.26845	4.50018e-22	1.33655e-19
546	ceRNA	TNPO1	29.1623	37.2383	-0.352683	7.25659e-06	630	-0.27288	1.94791e-39	1.35379e-36
547	ceRNA	TNRC6A	16.1387	20.3881	-0.337199	9.12382e-06	322	-0.34108	1.50804e-30	5.12734e-28
548	ceRNA	TNRC6C	4.51247	8.38297	-0.893544	7.21356e-17	56	-0.70887	3.18373e-08	2.10126e-06
549	ceRNA	TOB1	80.2964	219.346	-1.4498	4.25797e-24	18	-1.10022	7.11555e-07	1.49427e-05
550	ceRNA	TOP1	65.0856	79.6794	-0.291869	6.12233e-06	119	-0.29146	7.77006e-09	9.94567e-07
551	ceRNA	TOR1AIP1	34.9079	49.0479	-0.490637	3.58316e-09	36	-0.34431	5.8846e-07	2.11846e-05
552	ceRNA	TOX3	4.05749	21.3132	-2.39309	2.1766e-27	15	-2.18597	1.20906e-06	3.50628e-05
553	ceRNA	TRIM23	4.47326	8.95695	-1.00168	1.58517e-22	119	-0.53348	1.69086e-17	2.28266e-15
554	ceRNA	TRIM37	17.4718	25.0509	-0.519832	1.26728e-05	225	-0.31851	2.21034e-18	5.10589e-16
555	ceRNA	TRIO	15.686	20.7507	-0.403677	8.85319e-06	85	-0.36393	3.99671e-10	3.67697e-08
556	ceRNA	TRIP11	12.5851	17.9487	-0.512163	2.69743e-10	87	-0.19327	1.31101e-07	1.23235e-05
557	ceRNA	TRPM7	17.1974	22.9458	-0.41604	1.65162e-08	34	-0.36432	6.21444e-09	2.17505e-07
558	ceRNA	TRPS1	70.7773	106.623	-0.591159	7.28797e-06	129	-0.4623	1.42177e-16	2.0047e-14
559	ceRNA	TSG101	74.7344	106.048	-0.504872	1.03042e-15	57	-0.50207	1.43053e-08	8.86929e-07
560	ceRNA	TSHZ1	8.99775	14.2803	-0.666395	2.01286e-12	61	-0.61494	4.67307e-08	3.13096e-06
561	ceRNA	TWF1	53.7161	77.5311	-0.52942	3.9396e-13	214	-0.34087	6.4248e-16	1.41346e-13
562	ceRNA	U2SURP	43.8091	34.0314	0.364367	0.000221903	156	-0.09542	1.61784e-08	2.58855e-06
563	ceRNA	UBE2B	27.8623	41.5589	-0.576841	2.43527e-18	87	-0.43834	2.10069e-07	2.1427e-05
564	ceRNA	UBE2K	29.9435	41.2352	-0.461635	8.77356e-12	245	-0.28812	5.14063e-22	1.27488e-19
565	ceRNA	UBE2Q2	31.4286	40.1947	-0.354925	2.48246e-07	106	-0.28317	3.28292e-12	3.61121e-10
566	ceRNA	UBE3A	30.9541	47.0589	-0.604334	1.9385e-13	122	-0.35284	5.25254e-12	6.77578e-10
567	ceRNA	UBFD1	28.8713	40.3073	-0.481403	2.68142e-10	129	-0.21148	1.67476e-11	2.16044e-09
568	ceRNA	UBL3	16.7194	32.9297	-0.97787	3.00179e-21	223	-0.44538	7.44318e-13	1.86824e-10
569	ceRNA	UBN2	4.77861	5.83461	-0.288044	0.000389127	184	-0.30047	9.22939e-22	1.74436e-19
570	ceRNA	UBR1	5.55793	11.1355	-1.00254	1.03096e-22	132	-0.40671	2.0106e-09	3.13653e-07
571	ceRNA	UBR3	15.7771	18.4954	-0.22934	7.75396e-05	224	-0.2722	4.12307e-25	9.44183e-23
572	ceRNA	UHMK1	21.137	30.5108	-0.529549	5.74225e-05	133	-0.26449	3.11599e-10	4.51818e-08
573	ceRNA	USP3	20.1008	26.7898	-0.41443	2.37673e-08	101	-0.27137	4.84753e-11	5.04143e-09
574	ceRNA	USP32	13.7874	29.4174	-1.09332	5.95671e-11	228	-0.37118	1.02385e-18	2.50842e-16
575	ceRNA	USP34	77.982	61.6633	0.338729	4.22734e-06	155	0.06039	1.35463e-08	2.26223e-06
576	ceRNA	USP38	13.0371	18.2093	-0.48206	5.83257e-10	120	-0.4059	4.48033e-15	6.13805e-13
577	ceRNA	USP46	5.78548	7.28898	-0.333282	3.93762e-05	185	-0.23406	3.0077e-13	6.07555e-11
578	ceRNA	USP47	27.9159	39.9203	-0.516035	1.18688e-11	97	-0.33916	8.18435e-08	8.51173e-06
579	ceRNA	USP53	8.22498	11.8448	-0.526164	3.43406e-07	175	-0.24719	2.50068e-17	4.4512e-15
580	ceRNA	USP6NL	24.5747	11.6105	1.08175	3.62617e-24	223	0.22299	6.45869e-13	1.54363e-10
581	ceRNA	VAV3	31.4612	143.389	-2.18828	6.19913e-31	23	-1.53084	1.38612e-08	5.68308e-07
582	ceRNA	VEZF1	27.251	45.2311	-0.731006	2.48637e-13	424	-0.40496	1.01731e-31	4.62875e-29
583	ceRNA	WAPAL	25.4703	32.946	-0.371287	1.17482e-08	253	-0.35536	6.20624e-21	1.6881e-18
584	ceRNA	WASF1	9.51574	5.36215	0.827504	3.48932e-06	44	0.83291	4.27695e-10	2.01017e-08
585	ceRNA	WASL	32.6569	41.4386	-0.343588	1.10967e-06	220	-0.26861	2.46657e-12	5.64844e-10
586	ceRNA	WDFY3	14.0421	20.3871	-0.537903	3.06606e-14	434	-0.38931	9.97711e-28	4.75908e-25
587	ceRNA	WDR20	13.8656	20.4928	-0.563606	3.84315e-20	125	-0.62797	7.75232e-13	1.10858e-10
588	ceRNA	WDR26	53.5919	66.3753	-0.308631	1.66601e-05	240	-0.29704	3.59534e-15	9.56361e-13
589	ceRNA	WDR44	7.03805	10.0554	-0.514725	1.35587e-10	263	-0.31447	9.47455e-20	2.70972e-17
590	ceRNA	WDR7	5.72686	7.85205	-0.455326	6.8493e-08	90	-0.23193	6.56236e-11	6.103e-09
591	ceRNA	WNK3	0.626619	0.246556	1.34567	9.47898e-12	426	0.04974	6.69307e-08	2.88471e-05
592	ceRNA	XIAP	13.8843	18.9033	-0.44518	1.26809e-10	66	-0.26172	3.37252e-08	2.22586e-06
593	ceRNA	XPO1	143.265	112.274	0.351664	3.27002e-07	227	-0.04481	6.66547e-11	1.54639e-08
594	ceRNA	YAF2	5.25772	6.31291	-0.263868	4.26964e-08	52	-0.37767	1.33262e-14	6.92964e-13
595	ceRNA	YES1	55.5035	27.9936	0.987479	1.00898e-18	111	0.14619	4.72545e-11	5.33976e-09
596	ceRNA	YIPF4	39.2856	30.7767	0.352163	0.000182075	103	-0.03308	1.18703e-08	1.22264e-06
597	ceRNA	YIPF5	26.0455	34.7858	-0.417462	2.17359e-11	62	-0.23054	8.30205e-09	5.39633e-07
598	ceRNA	YPEL2	6.92687	16.5976	-1.2607	6.88279e-22	225	-0.47231	1.55793e-16	3.81693e-14
599	ceRNA	YTHDC1	21.2836	25.6647	-0.270045	2.72655e-07	134	-0.24757	1.89473e-12	2.57683e-10
600	ceRNA	ZBTB11	11.3964	13.7022	-0.265835	7.84423e-05	129	-0.31433	1.41102e-14	1.87666e-12
601	ceRNA	ZBTB4	20.6056	36.5872	-0.828306	1.31308e-20	145	-0.3915	8.99964e-08	1.70093e-05
602	ceRNA	ZBTB41	10.132	16.656	-0.71712	1.99767e-10	277	-0.32685	2.46845e-28	7.13381e-26
603	ceRNA	ZBTB43	5.70866	6.87582	-0.268379	2.83715e-06	94	-0.30033	1.81344e-11	1.75904e-09
604	ceRNA	ZBTB5	13.6196	9.53574	0.514263	4.71517e-08	184	-0.06366	1.86801e-08	3.54922e-06
605	ceRNA	ZBTB6	7.19234	9.83051	-0.450806	3.54954e-10	93	-0.28074	1.02111e-11	9.49631e-10
606	ceRNA	ZDHHC17	8.38873	12.0955	-0.527944	3.24619e-10	361	-0.37891	1.35592e-24	5.38301e-22
607	ceRNA	ZFAND6	78.8948	104.211	-0.401508	9.85257e-12	60	-0.30379	1.0223e-08	6.23604e-07
608	ceRNA	ZFC3H1	8.00671	10.3824	-0.374857	0.000496662	93	-0.34066	7.60218e-14	7.14605e-12
609	ceRNA	ZFHX3	4.14572	6.33075	-0.610754	2.69743e-10	344	-0.39941	1.42459e-24	5.57013e-22
610	ceRNA	ZFHX4	1.10119	1.80813	-0.715437	6.72065e-09	625	-0.44041	3.73193e-10	2.91464e-07
611	ceRNA	ZFX	11.5498	18.9685	-0.715738	1.5034e-10	442	-0.33185	1.95615e-34	9.31126e-32
612	ceRNA	ZFYVE16	10.2363	21.5302	-1.07267	4.49569e-32	139	-0.48637	1.59401e-09	2.45478e-07
613	ceRNA	ZFYVE26	7.04956	10.0065	-0.505329	5.26e-08	187	-0.21828	4.7775e-11	9.31612e-09
614	ceRNA	ZNF197	9.14366	12.6803	-0.471748	9.47898e-12	58	-0.31179	2.12542e-08	1.254e-06
615	ceRNA	ZNF217	33.0095	58.0121	-0.813473	1.72499e-09	259	-0.29474	6.48729e-21	1.81644e-18
616	ceRNA	ZNF236	3.08818	4.16907	-0.432966	1.55155e-05	248	-0.28604	5.83872e-27	1.50055e-24
617	ceRNA	ZNF280D	13.832	19.1036	-0.465833	8.71751e-12	83	-0.41339	1.36193e-16	1.17126e-14
618	ceRNA	ZNF367	8.21835	5.7865	0.506157	4.1315e-05	310	-0.0642	4.08991e-12	1.2965e-09
619	ceRNA	ZNF449	3.54477	4.20236	-0.245507	0.000415937	109	-0.21089	3.80912e-08	4.15194e-06
620	ceRNA	ZNF609	10.9911	18.6742	-0.764712	3.14585e-16	75	-0.37831	2.30256e-07	1.84205e-05
621	ceRNA	ZNF644	32.4639	21.685	0.582138	5.43176e-12	189	0.08292	1.42786e-08	2.72721e-06
622	ceRNA	ZNF652	17.7939	37.3502	-1.06973	7.49947e-25	24	-1.72995	4.6508e-07	2.27889e-05
623	ceRNA	ZNF654	6.31623	7.74179	-0.293604	1.29991e-05	260	-0.27163	3.84532e-24	1.01517e-21
624	ceRNA	ZNF711	7.32039	3.2882	1.15462	3.13288e-06	41	0.74961	9.03536e-09	4.06591e-07
625	ceRNA	ZNF800	11.656	14.7276	-0.337446	1.67303e-05	378	-0.25988	3.04824e-25	1.25283e-22
626	ceRNA	ZNRF3	4.05995	5.96099	-0.55409	7.10061e-06	47	-0.28041	9.74036e-07	4.87018e-05
627	ceRNA	ZSWIM6	4.43389	7.18318	-0.696049	7.62644e-11	207	-0.35192	5.85369e-14	1.3405e-11

## Sheet: HER2-enriched
No.	Regulator		Average expression (normalized read counts)		Expression difference		Target set enrichment analysis by running-sum statistic
	Type	ID	HER2-enriched	Others	Log2 fold change	U-test p-val (two-tailed)	Number of Targets	Log2 fold change of targets (average)	pFET	Adjusted P-val
1	miRNA	hsa-let-7a-5p	21873.3	29483.4	-0.430733	3.87624e-06	723	-0.32587	2.79124e-08	2.01807e-05
2	miRNA	hsa-let-7b-3p	102.713	119.448	-0.217752	0.00097929	917	-0.35091	2.00655e-09	1.84001e-06
3	miRNA	hsa-miR-101-3p	7533.36	11553.7	-0.616984	1.21976e-07	771	-0.32789	6.57854e-09	5.07864e-06
4	miRNA	hsa-miR-105-5p	37.5552	35.9616	0.0625541	0.000695848	754	-0.30323	8.38551e-11	6.49877e-08
5	miRNA	hsa-miR-130b-3p	19.7264	16.1303	0.290358	0.000107964	932	-0.36086	2.63688e-09	2.48921e-06
6	miRNA	hsa-miR-135a-5p	1.3089	14.385	-3.45814	1.12204e-05	639	-0.25925	7.60384e-08	4.91968e-05
7	miRNA	hsa-miR-142-5p	166.853	123.289	0.43653	0.000101646	795	-0.35004	1.37268e-08	1.11187e-05
8	miRNA	hsa-miR-148a-3p	81235.2	60188.4	0.43262	3.65725e-05	572	-0.44356	1.78301e-10	1.1643e-07
9	miRNA	hsa-miR-148a-5p	51.1148	36.7141	0.477408	2.19208e-05	283	-0.35928	8.54275e-08	2.51157e-05
10	miRNA	hsa-miR-181b-5p	592.89	440.262	0.429403	0.000819657	653	-0.38424	2.11678e-10	1.39284e-07
11	miRNA	hsa-miR-181c-5p	33.8815	52.4912	-0.631578	0.000246914	799	-0.34143	2.78549e-08	2.22561e-05
12	miRNA	hsa-miR-194-5p	252.154	183.997	0.454623	0.000391408	355	-0.43577	2.8342e-09	1.11101e-06
13	miRNA	hsa-miR-195-5p	39.7195	56.8841	-0.518176	0.000184908	1017	-0.3159	4.05763e-09	4.13473e-06
14	miRNA	hsa-miR-22-5p	42.0565	33.1278	0.344287	0.000290441	283	-0.46324	2.31276e-08	7.72461e-06
15	miRNA	hsa-miR-30a-5p	20414.1	63949.1	-1.64736	4.61839e-13	944	-0.30257	2.40215e-08	2.27003e-05
16	miRNA	hsa-miR-30c-5p	730.501	1238.75	-0.761922	2.04607e-06	910	-0.30297	4.95511e-08	4.5141e-05
17	miRNA	hsa-miR-3653	11.448	9.28412	0.302259	0.000359182	467	-0.43286	2.00846e-08	1.02833e-05
18	miRNA	hsa-miR-421	4.89269	3.2056	0.610032	0.000264341	484	-0.47412	2.28117e-09	1.22271e-06
19	miRNA	hsa-miR-539-5p	18.4117	11.5485	0.672919	0.000678854	427	-0.49124	1.69417e-07	8.23365e-05
20	miRNA	hsa-miR-589-3p	4.6062	3.31366	0.475152	0.000266095	347	-0.42779	4.35527e-11	1.655e-08
21	miRNA	hsa-miR-590-3p	7.98221	6.04974	0.399915	1.62555e-05	788	-0.45779	1.65862e-15	1.43471e-12
22	ceRNA	ACVR2B	2.39838	3.54294	-0.562889	9.85093e-06	253	-0.28018	4.86264e-14	1.27401e-11
23	ceRNA	AEBP2	8.06844	10.6119	-0.395323	5.59429e-06	314	-0.29261	1.14488e-22	3.67505e-20
24	ceRNA	AKAP9	30.4479	43.7691	-0.523571	0.000102119	241	-0.28578	3.2985e-16	8.24625e-14
25	ceRNA	ANKFY1	14.7823	18.7736	-0.344834	0.00022803	172	-0.2344	1.10249e-10	1.90731e-08
26	ceRNA	ANKRA2	9.75778	14.2361	-0.544927	2.51315e-06	339	-0.40807	2.52699e-14	9.75419e-12
27	ceRNA	ANKRD12	8.06581	11.249	-0.479912	0.000224016	193	-0.30082	3.17807e-19	6.35615e-17
28	ceRNA	APPL1	18.7022	27.8737	-0.575693	1.17338e-08	170	-0.29002	5.6939e-14	1.0306e-11
29	ceRNA	ARHGAP21	17.1661	23.8344	-0.473487	0.000602004	246	-0.29123	7.33447e-10	1.9143e-07
30	ceRNA	ARHGEF7	18.5885	23.1078	-0.313964	0.000673267	99	-0.27823	4.34972e-09	4.5672e-07
31	ceRNA	ARMC8	16.9751	18.615	-0.133042	0.000435468	190	-0.24141	3.97887e-12	7.71901e-10
32	ceRNA	ASB7	7.04294	9.53741	-0.437419	1.38036e-06	131	-0.24263	1.85048e-09	2.53515e-07
33	ceRNA	ASH1L	16.7281	23.7975	-0.508541	5.76938e-05	370	-0.25164	3.40804e-17	1.36322e-14
34	ceRNA	ATG14	8.68246	10.4652	-0.269421	0.000843321	79	-0.29128	5.31324e-07	4.51625e-05
35	ceRNA	ATXN7	7.31589	9.5212	-0.380111	3.43091e-05	322	-0.25975	7.20188e-21	2.40543e-18
36	ceRNA	ATXN7L1	4.2678	5.93501	-0.475757	1.58983e-06	149	-0.30427	2.47686e-14	3.88867e-12
37	ceRNA	B4GALT6	0.877743	1.5932	-0.860055	9.31042e-07	150	-0.3277	1.93894e-11	3.02474e-09
38	ceRNA	BAI3	0.0310722	0.0814255	-1.38985	0.00059703	53	-0.72458	2.12976e-09	1.36305e-07
39	ceRNA	BBX	16.5078	20.9403	-0.343134	0.000444815	564	-0.24958	8.15557e-26	4.77101e-23
40	ceRNA	BECN1	64.1893	83.1252	-0.372953	1.06523e-05	91	-0.32852	3.19878e-07	3.10281e-05
41	ceRNA	BOD1L1	9.13021	12.3043	-0.430439	5.76938e-05	346	-0.2506	4.29629e-18	1.53807e-15
42	ceRNA	C16orf52	8.15329	12.7874	-0.649274	2.13475e-10	504	-0.29882	1.27191e-24	6.81742e-22
43	ceRNA	C18orf25	9.02394	12.4938	-0.469381	3.65213e-07	110	-0.24419	1.95208e-07	2.26441e-05
44	ceRNA	C5orf24	22.7927	29.2615	-0.360428	0.000614664	493	-0.28266	4.48918e-18	2.41967e-15
45	ceRNA	C7orf60	4.56537	6.07601	-0.412393	8.84026e-07	442	-0.24685	1.46033e-18	6.60069e-16
46	ceRNA	CAPRIN1	116.456	153.467	-0.398143	9.01262e-06	327	-0.23911	1.24693e-22	4.23956e-20
47	ceRNA	CASC4	52.9873	68.5176	-0.370829	4.85125e-05	119	-0.25229	2.20807e-07	2.6276e-05
48	ceRNA	CBLL1	15.1074	18.3547	-0.280901	0.000165963	111	-0.18701	4.7818e-08	5.30779e-06
49	ceRNA	CCDC6	57.6287	41.8821	0.460454	2.32982e-07	72	-0.1021	6.86055e-08	5.14541e-06
50	ceRNA	CCDC88A	6.40813	11.2446	-0.811258	0.000106476	201	-0.32273	2.9532e-09	6.20173e-07
51	ceRNA	CCNE2	16.5991	11.6725	0.507993	1.15078e-06	74	0.007	3.24444e-08	2.85511e-06
52	ceRNA	CDC23	22.5891	27.3216	-0.274418	0.000226015	94	-0.22155	5.65394e-08	5.48433e-06
53	ceRNA	CDC27	21.7792	25.898	-0.249888	0.000116251	195	-0.26995	2.42703e-12	5.21812e-10
54	ceRNA	CDK12	52.6781	20.7715	1.3426	8.4573e-08	222	-0.17665	9.65608e-12	2.2209e-09
55	ceRNA	CDK17	16.4888	22.5833	-0.453772	5.55211e-05	796	-0.35525	7.98134e-32	6.85597e-29
56	ceRNA	CDKN2AIP	14.0039	17.9624	-0.359151	3.07783e-05	107	-0.24195	2.89277e-11	3.12419e-09
57	ceRNA	CELF1	55.4984	67.4799	-0.282013	0.000752309	492	-0.24186	7.8487e-23	4.01068e-20
58	ceRNA	CEP120	7.24272	10.2604	-0.502484	1.09899e-05	185	-0.32171	4.06094e-09	8.00005e-07
59	ceRNA	CFL2	7.16878	9.30376	-0.376085	3.32725e-06	88	-0.41224	1.24748e-07	1.17263e-05
60	ceRNA	CGGBP1	36.3491	47.3735	-0.38216	5.41736e-06	173	-0.30914	6.59211e-10	1.20636e-07
61	ceRNA	CHIC1	2.14357	3.50845	-0.710821	4.88985e-08	187	-0.33105	7.23354e-12	1.41054e-09
62	ceRNA	CLASP2	11.7226	17.4906	-0.577293	1.33043e-08	198	-0.29938	4.91613e-12	1.00289e-09
63	ceRNA	CLIP4	3.09324	6.86446	-1.15003	1.00897e-06	86	-0.53708	2.64191e-09	2.4834e-07
64	ceRNA	CNOT4	13.6023	15.9	-0.225172	0.000424491	222	-0.25584	1.35164e-15	3.09525e-13
65	ceRNA	CNOT6L	11.0338	14.3987	-0.384004	0.000125707	544	-0.30429	1.91409e-23	1.08912e-20
66	ceRNA	COPS2	33.3262	37.1492	-0.156674	0.000774166	189	-0.25785	4.74939e-12	9.16632e-10
67	ceRNA	CPEB2	7.6975	15.4172	-1.00208	1.63792e-07	658	-0.47038	4.10509e-26	3.09934e-23
68	ceRNA	CPEB3	2.03599	2.64473	-0.377389	0.000278013	817	-0.33945	3.01276e-26	2.64822e-23
69	ceRNA	CREBBP	19.3158	25.9722	-0.42719	2.49745e-05	226	-0.25638	4.4148e-13	1.06838e-10
70	ceRNA	CREBL2	28.0876	41.1859	-0.552219	3.46686e-09	77	-0.37138	2.75274e-07	2.17466e-05
71	ceRNA	CREBRF	4.35602	7.52685	-0.789036	1.08458e-07	923	-0.34765	3.48421e-33	3.43194e-30
72	ceRNA	CRIM1	22.5375	41.5034	-0.880905	1.14673e-07	240	-0.35468	1.79383e-17	4.50251e-15
73	ceRNA	CRISPLD1	2.86172	42.6562	-3.8978	2.65897e-10	39	-0.89901	1.3023e-08	5.73012e-07
74	ceRNA	CSNK1G3	13.2629	18.7856	-0.502236	6.17028e-07	255	-0.32988	2.03672e-14	5.47878e-12
75	ceRNA	CTDSPL2	11.715	14.3179	-0.289461	0.000560815	525	-0.23342	2.67539e-23	1.42331e-20
76	ceRNA	DACH1	5.33511	12.7333	-1.25502	4.94609e-05	268	-0.48099	9.73427e-09	3.07603e-06
77	ceRNA	DCAF8	46.6932	64.5082	-0.466269	3.57674e-08	87	-0.35051	3.50436e-07	3.46932e-05
78	ceRNA	DCP1A	7.72574	10.6824	-0.467485	6.85278e-07	276	-0.30934	4.70601e-19	1.35062e-16
79	ceRNA	DENND4C	16.2976	20.9631	-0.36319	0.000115715	214	-0.26018	7.73364e-11	1.7246e-08
80	ceRNA	DLC1	9.20218	14.509	-0.656901	0.00019864	276	-0.44399	2.00434e-09	6.19342e-07
81	ceRNA	DMTF1	14.3535	20.0399	-0.481477	1.51968e-06	156	-0.30128	1.52327e-14	2.58956e-12
82	ceRNA	DMXL1	10.2208	13.7715	-0.430175	6.54797e-05	137	-0.29838	4.76824e-07	6.81858e-05
83	ceRNA	DNAJC16	10.7689	13.2221	-0.296081	0.000342544	122	-0.25268	1.35715e-07	1.77787e-05
84	ceRNA	EGR3	5.0395	11.0774	-1.13627	2.73221e-05	67	-0.6178	9.35175e-09	8.79064e-07
85	ceRNA	EHBP1	11.8531	14.8086	-0.32117	0.000526654	106	-0.31465	1.97466e-09	2.19187e-07
86	ceRNA	EIF2C1	11.3405	13.4409	-0.245143	0.000952105	381	-0.23307	7.6129e-16	3.03755e-13
87	ceRNA	EIF2C4	4.54328	6.849	-0.592159	1.19081e-06	374	-0.22576	2.68241e-16	1.01127e-13
88	ceRNA	ELF2	20.133	25.9037	-0.363592	5.88846e-07	96	-0.24432	1.53499e-07	1.48894e-05
89	ceRNA	ELK3	15.6263	20.8545	-0.416381	0.00097929	641	-0.32269	7.39195e-17	5.11523e-14
90	ceRNA	EPC2	11.4005	16.1643	-0.503709	6.58175e-08	417	-0.22471	4.84438e-19	2.05402e-16
91	ceRNA	EPS15	24.1584	29.5011	-0.288246	2.82902e-05	193	-0.25142	7.81947e-14	1.58735e-11
92	ceRNA	ETNK1	15.399	21.1523	-0.457979	5.88089e-05	182	-0.26707	7.79678e-13	1.47359e-10
93	ceRNA	FAM116A	10.0743	14.4023	-0.515625	4.27809e-08	139	-0.23605	8.03555e-11	1.11694e-08
94	ceRNA	FAM120A	104.768	129.776	-0.308825	5.74176e-05	245	-0.30125	7.32778e-10	1.92721e-07
95	ceRNA	FAM133B	3.62556	4.42534	-0.287586	0.000577452	297	-0.24415	1.93746e-21	5.83175e-19
96	ceRNA	FBXL17	7.72812	11.2886	-0.54668	1.12204e-05	211	-0.34179	1.44888e-10	3.31794e-08
97	ceRNA	FBXL3	26.2496	34.9847	-0.414425	0.000565528	109	-0.24902	2.66162e-08	3.00763e-06
98	ceRNA	FNDC3A	16.1461	20.8437	-0.368422	0.000260307	475	-0.30511	1.51247e-15	7.83462e-13
99	ceRNA	FRS2	15.3122	25.0924	-0.71257	9.65748e-05	701	-0.33521	8.8387e-27	6.67322e-24
100	ceRNA	FRYL	19.6551	26.5627	-0.434499	9.26023e-05	281	-0.27624	4.38505e-16	1.28482e-13
101	ceRNA	GATAD2B	14.0428	18.3785	-0.388196	3.51631e-05	190	-0.27451	1.72893e-12	3.50973e-10
102	ceRNA	GNPDA2	10.2803	15.3415	-0.577559	6.79193e-08	177	-0.31406	2.10594e-13	4.04341e-11
103	ceRNA	GPATCH8	11.9181	16.7497	-0.490976	2.42908e-08	184	-0.26998	2.38917e-10	4.65888e-08
104	ceRNA	GTF2H1	18.4807	22.5458	-0.286841	0.000113601	232	-0.23082	2.04513e-12	5.03102e-10
105	ceRNA	GTF2I	57.2487	76.714	-0.422247	3.28202e-05	76	-0.24403	2.11325e-08	1.64833e-06
106	ceRNA	HBP1	57.4944	73.5667	-0.35563	1.84606e-05	330	-0.30735	8.20922e-16	2.97174e-13
107	ceRNA	HECTD2	5.56809	8.28696	-0.57366	0.000238344	332	-0.36289	3.76536e-19	1.38565e-16
108	ceRNA	HIAT1	35.775	43.233	-0.273184	0.000251311	485	-0.23318	9.43476e-25	4.58529e-22
109	ceRNA	HIPK1	21.5291	27.481	-0.352145	0.000121173	293	-0.24355	4.71393e-14	1.40475e-11
110	ceRNA	HIPK3	14.8372	24.5594	-0.727059	2.69236e-07	252	-0.25118	9.94604e-09	2.53624e-06
111	ceRNA	HNRNPH2	97.2056	124.814	-0.360667	3.99411e-05	143	-0.30752	2.03165e-07	3.10843e-05
112	ceRNA	HNRNPK	387.405	437.076	-0.174039	0.000286656	120	-0.23004	5.93029e-10	7.17565e-08
113	ceRNA	HP1BP3	74.19	98.8068	-0.413385	1.39396e-05	120	-0.2782	8.96312e-13	1.10246e-10
114	ceRNA	IGF1R	10.9279	56.1572	-2.36145	2.4298e-16	69	-0.66069	2.84162e-07	2.35855e-05
115	ceRNA	IKZF4	3.59823	4.31881	-0.263345	0.000987198	162	-0.34723	1.03445e-14	1.79994e-12
116	ceRNA	IRF2BPL	22.1164	33.052	-0.579619	2.51998e-07	120	-0.33872	2.29557e-08	2.8465e-06
117	ceRNA	IRS2	2.76191	9.36308	-1.76132	2.28646e-13	28	-0.99615	1.36593e-06	5.05393e-05
118	ceRNA	ITSN2	13.7809	17.5139	-0.345826	0.000341065	87	-0.26714	5.01128e-07	4.71061e-05
119	ceRNA	JAK1	84.2432	103.965	-0.303464	0.00035765	103	-0.25893	4.60151e-07	5.19971e-05
120	ceRNA	JAZF1	7.00157	9.38297	-0.422366	0.000195122	298	-0.33304	7.57154e-13	2.36989e-10
121	ceRNA	KANSL1	15.4691	23.1515	-0.58172	8.2371e-10	147	-0.31005	2.06749e-09	3.26663e-07
122	ceRNA	KAT6A	17.7233	24.0272	-0.439022	0.000271993	331	-0.2409	4.34591e-18	1.44284e-15
123	ceRNA	KBTBD2	25.1729	30.5925	-0.281302	0.000116789	170	-0.22937	9.60857e-08	1.71993e-05
124	ceRNA	KCNC2	0.214484	5.33142	-4.63558	4.3247e-07	4	-2.16784	1.38168e-05	5.52673e-05
125	ceRNA	KIAA0240	9.45188	12.3715	-0.388349	8.79593e-05	334	-0.27025	4.5338e-24	1.5823e-21
126	ceRNA	KIAA0494	57.6015	70.5629	-0.292804	0.000507115	214	-0.27731	1.49493e-13	3.49815e-11
127	ceRNA	KIAA0528	14.7445	21.3944	-0.537057	1.83916e-07	68	-0.27658	4.49128e-10	3.05407e-08
128	ceRNA	KIAA1109	18.9187	29.7558	-0.653357	1.29735e-07	116	-0.24263	1.45412e-08	1.70132e-06
129	ceRNA	KIAA1468	10.8771	14.218	-0.386427	0.000370163	164	-0.27891	8.39522e-14	1.43558e-11
130	ceRNA	KIAA2026	9.47376	12.76	-0.429621	1.09938e-06	75	-0.24127	5.28747e-07	4.01848e-05
131	ceRNA	KIF13A	22.531	32.732	-0.538787	5.59429e-06	148	-0.28347	8.16863e-09	1.29881e-06
132	ceRNA	KIF21A	16.019	11.7739	0.444192	0.000117867	65	-0.08487	4.8627e-09	3.16075e-07
133	ceRNA	KLHL15	2.76906	4.23877	-0.61425	2.09171e-08	467	-0.31586	2.84052e-30	1.4089e-27
134	ceRNA	LIN7C	11.1545	14.0269	-0.330572	0.000169757	45	-0.28426	7.46234e-07	3.5073e-05
135	ceRNA	LRCH1	8.17811	10.1398	-0.310183	0.00092562	324	-0.30941	6.34952e-13	2.26678e-10
136	ceRNA	LRIG2	3.66891	4.89555	-0.416119	0.000191662	122	-0.26474	3.62224e-09	4.56402e-07
137	ceRNA	LRP6	7.09444	11.3693	-0.680388	2.21204e-06	295	-0.30034	1.05756e-19	3.32075e-17
138	ceRNA	LSM14A	69.3347	83.2348	-0.263611	0.000335223	166	-0.27177	1.67866e-11	3.03837e-09
139	ceRNA	LUC7L2	61.997	75.4422	-0.283172	4.38156e-05	60	-0.24636	1.25068e-07	7.50406e-06
140	ceRNA	MAGI1	4.91695	10.4344	-1.08551	9.32223e-13	423	-0.34881	5.29025e-27	2.4388e-24
141	ceRNA	MAML1	17.6392	21.6978	-0.298767	0.000118412	326	-0.24948	1.23026e-14	4.28131e-12
142	ceRNA	MAP2K4	16.8811	25.0006	-0.566557	0.000240462	130	-0.31936	8.56795e-08	1.16524e-05
143	ceRNA	MARCH8	7.69413	14.2822	-0.892388	1.25342e-06	197	-0.29123	2.47517e-09	5.22261e-07
144	ceRNA	MARS	75.6221	65.1534	0.214968	0.000722094	50	-0.14977	9.52386e-07	4.76193e-05
145	ceRNA	MAST4	9.81941	20.7371	-1.07851	1.09317e-06	215	-0.50117	2.87053e-13	6.97538e-11
146	ceRNA	MAT2B	50.9602	63.0975	-0.308211	4.38156e-05	167	-0.25487	8.64084e-08	1.45166e-05
147	ceRNA	MBD5	5.77187	8.01508	-0.473679	1.22732e-07	106	-0.2601	1.24738e-12	1.35965e-10
148	ceRNA	MBNL1	41.6347	52.1891	-0.325963	0.00071913	396	-0.3466	4.161e-14	1.79339e-11
149	ceRNA	MED12L	0.223437	0.497538	-1.15494	7.25987e-09	64	-0.38175	7.4717e-08	4.93132e-06
150	ceRNA	MED13L	18.3217	39.211	-1.0977	8.77418e-12	209	-0.3476	4.59198e-10	1.09289e-07
151	ceRNA	MEF2A	16.862	23.0774	-0.452705	6.7064e-06	276	-0.30581	4.46883e-15	1.30043e-12
152	ceRNA	MEX3C	20.0769	25.6511	-0.353479	8.67297e-05	252	-0.28988	9.97576e-13	2.74333e-10
153	ceRNA	MIB1	14.4606	19.4366	-0.426646	0.000181612	202	-0.21204	2.23933e-08	4.52345e-06
154	ceRNA	MIER1	13.1589	17.5306	-0.413837	1.11204e-06	275	-0.27699	1.14493e-19	3.3203e-17
155	ceRNA	MIER3	9.4307	12.2453	-0.376791	0.000394763	898	-0.2596	1.92911e-30	1.78829e-27
156	ceRNA	MKL2	16.563	29.4592	-0.830751	5.23727e-07	400	-0.35487	1.48749e-16	6.26235e-14
157	ceRNA	MLL5	28.458	37.3709	-0.39308	1.36485e-06	273	-0.28323	2.12736e-17	6.19062e-15
158	ceRNA	MLLT10	14.6734	19.4892	-0.409468	4.85125e-05	196	-0.25821	2.19848e-13	4.48491e-11
159	ceRNA	MSL2	16.9269	20.4535	-0.273031	0.000234169	271	-0.2447	2.58221e-17	7.15273e-15
160	ceRNA	MTMR10	12.1554	14.9949	-0.302873	0.000549212	63	-0.22689	1.13622e-06	7.15818e-05
161	ceRNA	MTMR9	3.66666	4.7343	-0.368684	0.000836518	86	-0.26963	2.63173e-07	2.31592e-05
162	ceRNA	MYB	27.5927	55.3198	-1.00351	9.74842e-07	168	-0.46709	7.48353e-09	1.37697e-06
163	ceRNA	NAB1	12.4976	18.7716	-0.586904	6.20644e-07	181	-0.31331	1.84236e-12	3.50048e-10
164	ceRNA	NEK7	23.2282	30.4619	-0.391132	0.000150902	176	-0.22758	5.58202e-12	1.02709e-09
165	ceRNA	NFAT5	7.75552	11.2763	-0.540001	4.60138e-07	174	-0.30141	1.46361e-12	2.69304e-10
166	ceRNA	NFE2L2	66.8321	79.5375	-0.251095	0.000558472	167	-0.22213	1.11788e-08	1.93393e-06
167	ceRNA	NOVA1	3.42992	13.6809	-1.99592	9.41775e-07	142	-1.21411	7.28107e-13	2.06782e-10
168	ceRNA	NPAS3	0.413724	1.04061	-1.33069	2.24636e-09	76	-0.62531	2.12944e-10	2.04426e-08
169	ceRNA	NR1D2	16.4546	22.249	-0.435251	0.00018995	117	-0.29569	1.05571e-08	1.35131e-06
170	ceRNA	NR3C1	15.6885	23.9766	-0.611924	2.36365e-05	248	-0.29602	2.54731e-14	6.87774e-12
171	ceRNA	NRIP1	19.6554	37.362	-0.926651	2.68544e-06	146	-0.29696	4.42925e-08	7.04251e-06
172	ceRNA	OSR1	1.11896	6.79848	-2.60305	6.21891e-08	41	-1.07555	4.47647e-11	2.41729e-09
173	ceRNA	OTUD4	12.1426	14.9662	-0.30163	0.000126287	805	-0.2482	1.0038e-34	8.62261e-32
174	ceRNA	OXSR1	20.9076	24.2436	-0.213576	0.000752309	108	-0.2695	7.5512e-08	8.15529e-06
175	ceRNA	PAFAH1B1	38.3904	48.6111	-0.34054	0.000109984	348	-0.28652	7.5098e-14	2.83119e-11
176	ceRNA	PAK7	0.0468983	0.171462	-1.87028	0.00011951	59	-0.97572	1.81462e-08	1.50613e-06
177	ceRNA	PAN3	15.4308	21.2784	-0.463579	3.96135e-06	308	-0.31506	3.32629e-19	1.09435e-16
178	ceRNA	PAPD4	19.3316	26.0142	-0.428342	3.81343e-06	303	-0.29055	6.06955e-16	2.00295e-13
179	ceRNA	PAPOLG	7.44793	8.96916	-0.268134	0.000304701	139	-0.19349	1.44295e-07	2.03455e-05
180	ceRNA	PAX6	0.587026	0.953981	-0.700536	0.00042811	49	-0.63866	6.93463e-07	3.95274e-05
181	ceRNA	PAXIP1	9.87135	16.0116	-0.697801	9.42359e-09	94	-0.26026	3.11398e-07	2.98942e-05
182	ceRNA	PCDH19	0.45611	2.84181	-2.63936	1.99178e-05	178	-0.48849	1.64632e-08	3.11154e-06
183	ceRNA	PCMTD1	39.9641	68.9678	-0.787219	8.17922e-10	55	-0.3941	3.45162e-09	2.07097e-07
184	ceRNA	PCNP	84.0822	96.5542	-0.199537	0.00097144	243	-0.22386	5.6813e-15	1.42033e-12
185	ceRNA	PDE12	12.5693	15.4344	-0.296242	0.000335223	90	-0.23784	3.05605e-07	2.84213e-05
186	ceRNA	PDS5A	36.7216	45.5517	-0.310876	0.000864103	412	-0.26788	8.57047e-24	3.71958e-21
187	ceRNA	PHF15	9.34276	20.0421	-1.10111	2.39399e-11	56	-0.40087	3.36478e-08	2.2544e-06
188	ceRNA	PHF2	19.2567	25.935	-0.429542	1.68869e-07	147	-0.30371	1.01038e-14	1.53577e-12
189	ceRNA	PHF21A	10.0153	12.811	-0.355183	1.81935e-06	98	-0.26672	1.86478e-10	1.97666e-08
190	ceRNA	PHF3	26.3629	33.6161	-0.350644	0.000133425	223	-0.25926	1.46187e-13	3.42078e-11
191	ceRNA	PKN2	13.8604	19.2554	-0.474293	6.02793e-07	363	-0.26318	1.6544e-21	6.43563e-19
192	ceRNA	PLEKHA3	10.7777	13.8549	-0.362349	1.19763e-06	245	-0.299	2.00104e-18	5.16267e-16
193	ceRNA	PNISR	35.7159	46.6193	-0.384362	0.000171291	127	-0.27893	4.16128e-10	5.78418e-08
194	ceRNA	PPIP5K2	16.7418	22.1459	-0.403586	4.03337e-05	68	-0.26601	6.22041e-07	4.41649e-05
195	ceRNA	PPP2R2A	36.3656	45.7883	-0.332405	0.000774166	168	-0.22983	7.70774e-10	1.31032e-07
196	ceRNA	PPTC7	7.1405	9.62278	-0.430428	0.00017441	230	-0.22304	1.32105e-09	3.11768e-07
197	ceRNA	PRKCE	2.1935	4.2239	-0.945337	4.00202e-09	37	-0.40437	2.17863e-06	8.27878e-05
198	ceRNA	PRPF38B	20.7737	26.1525	-0.332188	1.54453e-05	103	-0.24712	2.89832e-09	3.10121e-07
199	ceRNA	PUM1	35.8115	44.4153	-0.310637	2.18753e-06	169	-0.28443	1.35481e-10	2.46576e-08
200	ceRNA	PUM2	56.9001	66.8983	-0.233539	0.000147513	275	-0.22286	2.16638e-13	6.21751e-11
201	ceRNA	PURA	8.87234	11.7101	-0.400365	3.51631e-05	395	-0.30537	9.73217e-20	4.1751e-17
202	ceRNA	RAB11FIP2	4.38165	5.78653	-0.401223	0.00016823	122	-0.32011	5.97013e-07	7.94027e-05
203	ceRNA	RAB12	26.1598	35.5391	-0.442059	2.20316e-05	46	-0.34251	1.41421e-06	7.07104e-05
204	ceRNA	RABEP1	40.3334	73.8298	-0.872228	3.87624e-06	202	-0.37338	4.29523e-09	9.40656e-07
205	ceRNA	RALA	63.1747	51.5117	0.294445	2.24929e-06	50	-0.09056	4.91266e-07	2.50546e-05
206	ceRNA	RB1CC1	19.4227	27.7231	-0.513348	3.82208e-05	357	-0.28108	1.8644e-20	7.12201e-18
207	ceRNA	RBL2	26.399	35.5173	-0.428037	3.63933e-05	268	-0.27136	1.78543e-13	4.85637e-11
208	ceRNA	RCOR3	22.0523	33.8737	-0.619237	3.24177e-07	222	-0.34298	5.23178e-12	1.22424e-09
209	ceRNA	RHOT1	23.5863	27.8212	-0.238233	0.000158627	133	-0.2904	2.25749e-10	3.20564e-08
210	ceRNA	RIC8B	5.58217	8.01921	-0.522635	1.45252e-06	74	-0.22497	4.74509e-07	3.51137e-05
211	ceRNA	RICTOR	6.15703	8.48465	-0.46262	0.000111003	385	-0.26814	6.87695e-16	2.88832e-13
212	ceRNA	RMND5A	25.6258	31.1541	-0.281826	0.000296843	105	-0.28875	1.47468e-09	1.59265e-07
213	ceRNA	RNF2	13.4885	19.7178	-0.547764	3.50848e-08	118	-0.31467	1.33638e-10	1.71056e-08
214	ceRNA	RNF38	15.2665	20.247	-0.407343	1.90307e-05	488	-0.26508	3.0618e-30	1.56458e-27
215	ceRNA	RSBN1	6.08284	8.70692	-0.517418	1.14271e-08	521	-0.28567	1.83721e-25	1.01782e-22
216	ceRNA	RSBN1L	11.3983	16.6639	-0.547909	4.71218e-09	233	-0.28027	1.78943e-16	4.50936e-14
217	ceRNA	RUFY2	5.62072	7.53633	-0.423107	0.000158627	266	-0.23878	2.65321e-12	7.16367e-10
218	ceRNA	RUNX1	42.1266	64.2624	-0.609242	1.32406e-05	129	-0.37012	4.02007e-09	5.8693e-07
219	ceRNA	SATB2	1.33046	2.47813	-0.897326	0.000103554	255	-0.41796	1.03041e-08	2.98818e-06
220	ceRNA	SESTD1	8.62876	14.7211	-0.770659	2.3822e-08	23	-0.39603	1.20026e-06	3.12069e-05
221	ceRNA	SETBP1	3.16077	6.51715	-1.04397	6.0633e-07	61	-0.53217	8.48962e-11	5.43335e-09
222	ceRNA	SETD2	38.074	45.8799	-0.269056	2.61232e-05	79	-0.23656	1.1889e-10	9.39233e-09
223	ceRNA	SIRT1	14.0383	17.9237	-0.352504	0.000424491	329	-0.27395	7.79451e-18	2.65013e-15
224	ceRNA	SLC44A1	53.1507	76.2134	-0.519957	8.20152e-07	129	-0.3319	7.18602e-09	1.04197e-06
225	ceRNA	SLC4A7	7.38914	16.6006	-1.16775	1.43833e-09	186	-0.32055	2.67516e-10	5.40383e-08
226	ceRNA	SLMAP	24.0066	31.7155	-0.401759	1.16959e-05	240	-0.27376	1.25874e-15	3.08391e-13
227	ceRNA	SMAD2	26.7549	33.013	-0.303229	9.39103e-05	53	-0.25516	1.54346e-06	8.33468e-05
228	ceRNA	SMAD4	10.3581	16.5873	-0.679322	8.07697e-11	109	-0.29986	4.47166e-11	5.00826e-09
229	ceRNA	SNIP1	11.4159	13.5627	-0.248597	0.00077734	130	-0.25338	8.12192e-11	1.08834e-08
230	ceRNA	SNRK	14.4482	18.2983	-0.340822	2.65164e-05	373	-0.32998	6.55731e-19	2.66883e-16
231	ceRNA	SNX13	12.4563	14.9714	-0.265335	0.000330894	340	-0.28123	4.53243e-16	1.70419e-13
232	ceRNA	SOCS5	11.4808	15.9396	-0.473388	2.56932e-06	528	-0.29074	3.16364e-20	1.76215e-17
233	ceRNA	SP1	33.2208	39.2795	-0.241689	0.000572646	288	-0.26692	9.34631e-14	2.73847e-11
234	ceRNA	SP2	14.7967	17.9208	-0.276363	6.59481e-05	69	-0.3577	2.74667e-08	1.92267e-06
235	ceRNA	SP3	48.1151	59.6791	-0.310734	6.85048e-05	254	-0.25206	1.00003e-13	2.69007e-11
236	ceRNA	SPIN1	41.514	57.6765	-0.474386	5.48087e-08	158	-0.24981	8.61964e-10	1.37052e-07
237	ceRNA	SPTBN1	45.3942	57.9095	-0.35129	0.00018995	115	-0.36785	7.4766e-10	1.00186e-07
238	ceRNA	SREK1	24.9786	33.4512	-0.421361	1.65058e-05	189	-0.24618	3.27728e-07	6.58733e-05
239	ceRNA	SRPK2	30.2473	43.0478	-0.509132	8.99453e-07	313	-0.26591	7.4881e-20	2.4561e-17
240	ceRNA	SRSF11	69.5205	90.7391	-0.384286	6.19185e-06	159	-0.23946	4.18833e-10	6.99451e-08
241	ceRNA	SS18	44.2767	62.2793	-0.492205	1.29465e-09	110	-0.26449	7.63736e-11	8.55384e-09
242	ceRNA	STAG2	33.3815	42.1611	-0.336864	7.4956e-05	349	-0.29086	2.65464e-14	9.90181e-12
243	ceRNA	STX12	29.8295	36.8201	-0.303754	1.01113e-05	92	-0.33617	2.02803e-07	2.02803e-05
244	ceRNA	SYT1	3.56728	15.6667	-2.13481	0.000250205	122	-0.58466	1.82367e-09	2.46196e-07
245	ceRNA	TBC1D12	5.12295	6.65536	-0.37754	0.000853669	117	-0.27416	8.10877e-08	1.02981e-05
246	ceRNA	TBC1D19	3.2556	4.88188	-0.584514	1.66826e-07	145	-0.23995	3.36969e-10	4.98713e-08
247	ceRNA	TEAD1	9.97434	15.7878	-0.662512	7.50965e-08	300	-0.26909	1.06578e-11	3.36787e-09
248	ceRNA	TGFBR1	39.4519	23.5242	0.745948	3.43091e-05	67	-0.10799	5.16752e-07	3.46224e-05
249	ceRNA	TMEM100	0.772146	2.64586	-1.77679	0.000176778	64	-0.80241	3.95379e-09	3.55841e-07
250	ceRNA	TMEM161B	6.53364	9.7931	-0.583879	1.76907e-06	194	-0.33631	1.35384e-10	2.82953e-08
251	ceRNA	TMEM170B	1.53477	2.13622	-0.477034	0.000299445	155	-0.28601	1.22187e-09	1.97943e-07
252	ceRNA	TNRC6A	15.081	20.1857	-0.420599	6.09375e-06	305	-0.29181	7.72466e-16	2.62638e-13
253	ceRNA	TRAPPC8	12.2629	17.7376	-0.532509	9.28646e-08	225	-0.27389	8.9757e-17	2.11827e-14
254	ceRNA	TRPC1	1.24549	2.05906	-0.725266	8.39272e-05	103	-0.32452	6.84124e-07	7.25172e-05
255	ceRNA	TRPS1	62.4615	104.836	-0.747099	1.06841e-06	118	-0.35934	1.19408e-07	1.68366e-05
256	ceRNA	TSHZ1	9.2641	13.8231	-0.577359	1.75165e-07	58	-0.52231	4.52512e-08	3.03183e-06
257	ceRNA	UBE2B	32.4786	39.863	-0.295563	0.000267267	96	-0.36373	3.77742e-09	3.85297e-07
258	ceRNA	UBE2D3	180.461	226.347	-0.326851	3.61137e-06	242	-0.2386	7.22339e-13	1.76973e-10
259	ceRNA	UBN2	4.06081	5.84344	-0.525052	5.11575e-07	185	-0.25383	1.64694e-11	3.11271e-09
260	ceRNA	UBR5	51.973	68.7439	-0.40347	5.7459e-06	219	-0.27653	2.10119e-13	4.9378e-11
261	ceRNA	UGCG	20.0948	56.562	-1.49301	2.34395e-07	85	-0.33455	9.43367e-09	8.01862e-07
262	ceRNA	ULK2	6.3418	12.0141	-0.921771	1.99652e-09	62	-0.39434	2.95763e-09	2.04076e-07
263	ceRNA	USP14	35.234	50.0086	-0.505207	0.000129215	62	-0.2199	1.41248e-06	8.75738e-05
264	ceRNA	USP24	11.3682	16.0748	-0.499794	5.36186e-07	190	-0.21588	4.3902e-12	8.38528e-10
265	ceRNA	USP33	30.5723	40.879	-0.419136	5.65211e-07	127	-0.31642	7.28265e-14	9.6131e-12
266	ceRNA	VEZF1	32.3303	43.1324	-0.415884	0.000867618	424	-0.30576	9.17206e-21	4.17329e-18
267	ceRNA	WASL	31.0208	40.9487	-0.400584	2.4717e-06	217	-0.28376	3.84359e-10	8.80183e-08
268	ceRNA	WDFY3	15.585	19.6789	-0.336493	0.000504981	450	-0.29567	2.45276e-17	1.16997e-14
269	ceRNA	WDR47	7.1806	10.2103	-0.507854	2.69419e-08	394	-0.24669	4.73144e-21	1.93989e-18
270	ceRNA	WHSC1L1	24.1069	47.758	-0.986298	1.17736e-06	77	-0.318	2.79206e-07	2.40117e-05
271	ceRNA	WNK1	51.6651	68.1782	-0.400119	0.000144195	321	-0.24859	3.53803e-19	1.19585e-16
272	ceRNA	WNK3	0.109622	0.34417	-1.65059	1.88385e-05	397	-0.36723	3.07626e-22	1.32587e-19
273	ceRNA	WWP1	51.2606	110.912	-1.11349	4.58506e-06	252	-0.35537	8.52133e-09	2.29224e-06
274	ceRNA	XYLT1	3.24939	6.17209	-0.925589	2.65164e-05	85	-0.26564	1.12805e-06	9.58842e-05
275	ceRNA	ZBTB4	22.5272	35.0589	-0.638111	1.81123e-09	169	-0.37809	1.89237e-08	3.57658e-06
276	ceRNA	ZBTB44	12.4709	18.9318	-0.602249	8.64062e-09	131	-0.32904	1.05597e-11	1.52059e-09
277	ceRNA	ZDHHC17	8.61885	11.769	-0.449428	1.40838e-05	375	-0.32075	2.65077e-17	1.05236e-14
278	ceRNA	ZFP161	7.7642	10.533	-0.440006	2.03793e-08	132	-0.29797	4.47665e-10	6.17777e-08
279	ceRNA	ZMYND11	56.0329	74.0957	-0.403114	3.21974e-06	185	-0.26981	3.87729e-14	7.32807e-12
280	ceRNA	ZNF197	9.89231	12.3001	-0.314287	0.000226015	59	-0.23231	8.22629e-07	4.85351e-05
281	ceRNA	ZNF236	2.6386	4.14104	-0.650221	2.44508e-07	242	-0.29177	2.53405e-21	6.51251e-19
282	ceRNA	ZNF280D	13.9277	18.6694	-0.422721	2.0394e-07	80	-0.33748	4.73129e-09	4.06891e-07
283	ceRNA	ZNF318	8.02523	10.468	-0.383373	0.000179183	130	-0.22394	9.83542e-10	1.33762e-07
284	ceRNA	ZNF516	2.23218	7.21076	-1.6917	5.18241e-14	56	-0.42954	9.31821e-08	5.2182e-06
285	ceRNA	ZNF800	11.1576	14.5467	-0.382669	0.000133425	389	-0.2509	2.96234e-15	1.21752e-12
286	ceRNA	ZRANB2	32.1803	42.1057	-0.38784	3.30907e-06	104	-0.25147	5.50977e-08	6.06075e-06
287	ceRNA	ZSWIM6	4.60501	6.941	-0.591939	1.06523e-05	222	-0.30271	7.22274e-11	1.65401e-08
288	ceRNA	ZZZ3	18.161	25.3046	-0.478558	2.2998e-06	117	-0.25764	7.80315e-08	9.36377e-06

## Sheet: LuminalA
No.	Regulator		Average expression (normalized read counts)		Expression difference		Target set enrichment analysis by running-sum statistic
	Type	ID	LuminalA	Others	Log2 fold change	U-test p-val (two-tailed)	Number of Targets	Log2 fold change of targets (average)	pFET	Adjusted P-val
1	miRNA	hsa-let-7d-5p	211.367	327.678	-0.632525	2.71484e-15	665	0.10962	2.54554e-08	1.92188e-05
2	miRNA	hsa-let-7f-1-3p	10.2146	12.6993	-0.314116	5.1675e-06	737	0.18415	2.8988e-11	2.76836e-08
3	miRNA	hsa-let-7g-5p	512.657	667.01	-0.379714	1.24629e-08	626	0.13313	5.62867e-08	4.29468e-05
4	miRNA	hsa-let-7i-5p	791.438	1034.74	-0.386723	1.70981e-08	584	0.11529	5.92327e-09	3.93897e-06
5	miRNA	hsa-miR-105-5p	9.77761	58.4227	-2.57898	2.30658e-17	680	0.11608	1.1121e-14	8.61874e-12
6	miRNA	hsa-miR-106a-5p	21.6021	55.2358	-1.35443	1.39249e-17	887	0.2127	5.94126e-14	7.07604e-11
7	miRNA	hsa-miR-106b-5p	181.447	339.43	-0.903564	1.32326e-24	811	0.26513	5.01933e-15	6.09849e-12
8	miRNA	hsa-miR-107	2023.31	2374.01	-0.230609	3.75499e-05	475	0.20004	1.42298e-09	8.75134e-07
9	miRNA	hsa-miR-1269a	52.8176	212.895	-2.01105	6.09174e-06	214	0.2064	7.40912e-08	1.97083e-05
10	miRNA	hsa-miR-1271-5p	3.24349	4.36004	-0.426796	0.000699079	436	0.27582	2.74221e-11	1.70291e-08
11	miRNA	hsa-miR-128	118.155	143.466	-0.280032	5.71776e-09	598	0.13852	3.91544e-08	2.75255e-05
12	miRNA	hsa-miR-130a-5p	0.820559	1.41373	-0.784827	0.000233793	619	0.1919	4.49885e-10	3.45512e-07
13	miRNA	hsa-miR-130b-3p	9.17881	22.7668	-1.31055	2.19966e-31	768	0.16737	4.03341e-10	3.80754e-07
14	miRNA	hsa-miR-135b-5p	9.7748	53.9101	-2.46342	1.35921e-08	744	0.04001	1.12224e-10	8.79834e-08
15	miRNA	hsa-miR-141-3p	1126.11	1930.39	-0.777548	1.76419e-10	576	0.16998	2.56511e-09	1.81353e-06
16	miRNA	hsa-miR-142-5p	82.5402	166.964	-1.01637	3.80697e-08	639	0.19382	1.11294e-11	9.01477e-09
17	miRNA	hsa-miR-148a-3p	54184.6	69728.1	-0.363856	7.60368e-05	505	0.18397	5.92511e-11	3.86909e-08
18	miRNA	hsa-miR-148b-3p	442.859	575.747	-0.378586	5.06567e-08	468	0.19701	4.30357e-10	2.60797e-07
19	miRNA	hsa-miR-155-5p	406.787	718.145	-0.820003	1.62627e-11	360	0.19089	2.94003e-08	1.30831e-05
20	miRNA	hsa-miR-15a-5p	116.335	158.702	-0.448037	1.04634e-12	819	0.19552	1.81505e-15	1.92033e-12
21	miRNA	hsa-miR-15b-5p	131.818	276.976	-1.07121	3.12201e-19	1011	0.13646	1.54584e-14	1.82409e-11
22	miRNA	hsa-miR-16-2-3p	7.89693	14.5248	-0.879154	6.63428e-23	471	0.21063	8.36481e-09	4.80977e-06
23	miRNA	hsa-miR-16-5p	732.02	1120.77	-0.614529	4.9418e-13	849	0.19156	4.18984e-13	4.66748e-10
24	miRNA	hsa-miR-17-5p	272.292	840.353	-1.62584	1.16403e-27	896	0.19845	3.32812e-11	3.91387e-08
25	miRNA	hsa-miR-181b-5p	376.396	526.617	-0.484505	8.21204e-06	637	0.02544	6.6645e-09	4.38524e-06
26	miRNA	hsa-miR-186-5p	266.11	490.034	-0.880862	4.88762e-24	510	0.26937	7.99265e-10	6.13036e-07
27	miRNA	hsa-miR-188-3p	0.879389	1.76685	-1.00661	2.04379e-07	179	0.05206	1.34228e-07	2.40268e-05
28	miRNA	hsa-miR-19a-3p	17.6084	58.1412	-1.7233	1.96444e-24	928	0.16809	6.63571e-16	7.72397e-13
29	miRNA	hsa-miR-19b-3p	93.1996	203.795	-1.12872	3.0298e-17	938	0.13001	1.81342e-14	1.96575e-11
30	miRNA	hsa-miR-200c-3p	9829.46	13483.5	-0.456007	2.13414e-08	742	0.05309	1.65534e-12	1.27958e-09
31	miRNA	hsa-miR-20a-5p	136.909	330.003	-1.26926	2.07221e-18	836	0.25591	5.67646e-12	7.11828e-09
32	miRNA	hsa-miR-20b-5p	28.6992	61.2906	-1.09465	1.40827e-06	771	0.20908	6.62094e-11	6.65405e-08
33	miRNA	hsa-miR-21-3p	2142.11	3236.56	-0.595429	2.69604e-09	228	0.14819	2.02587e-07	5.18622e-05
34	miRNA	hsa-miR-219-5p	0.585584	0.986506	-0.752451	7.94411e-05	203	0.23488	6.08821e-08	1.66208e-05
35	miRNA	hsa-miR-22-5p	29.7669	37.8625	-0.347057	3.21037e-06	277	0.14053	2.81919e-07	9.4161e-05
36	miRNA	hsa-miR-222-5p	3.79788	4.97368	-0.38912	1.3676e-05	396	0.02853	8.35249e-08	3.39111e-05
37	miRNA	hsa-miR-224-3p	1.11554	3.07476	-1.46274	1.77744e-06	424	0.17506	1.37699e-08	7.601e-06
38	miRNA	hsa-miR-224-5p	14.7673	81.7943	-2.4696	3.66554e-13	521	0.15887	4.62988e-09	2.88904e-06
39	miRNA	hsa-miR-23a-3p	3803.51	5000.3	-0.394682	3.85037e-06	673	0.19373	5.12058e-11	4.27056e-08
40	miRNA	hsa-miR-24-1-5p	9.44317	12.0147	-0.347463	0.00070276	73	0.23811	4.41258e-07	3.97132e-05
41	miRNA	hsa-miR-25-3p	7774.26	13338.2	-0.778783	4.57371e-24	571	0.18263	9.07711e-12	6.13613e-09
42	miRNA	hsa-miR-27a-3p	918.534	1275.28	-0.473406	1.31443e-06	715	0.14939	3.51436e-09	2.95909e-06
43	miRNA	hsa-miR-301a-3p	8.99083	21.9091	-1.285	7.30217e-24	805	0.12845	1.92016e-09	1.81647e-06
44	miRNA	hsa-miR-301b	0.519948	1.9763	-1.92636	3.10959e-20	810	0.12912	1.80111e-09	1.71466e-06
45	miRNA	hsa-miR-30e-5p	6364.24	9102.07	-0.516208	1.34054e-10	1005	0.01695	3.53014e-08	3.75254e-05
46	miRNA	hsa-miR-32-3p	0.820301	1.27855	-0.640281	0.000189574	626	0.11964	5.36062e-08	3.83284e-05
47	miRNA	hsa-miR-32-5p	20.3715	29.2088	-0.51985	1.11243e-07	706	0.18694	1.5004e-15	1.30235e-12
48	miRNA	hsa-miR-33a-3p	1.56608	2.81029	-0.843564	3.01145e-08	434	0.17224	6.42275e-10	3.51324e-07
49	miRNA	hsa-miR-340-5p	11.5975	17.0793	-0.558441	5.31538e-14	942	0.12726	2.34848e-14	2.47999e-11
50	miRNA	hsa-miR-3614-3p	0.9061	1.80474	-0.994052	8.5178e-11	135	0.16691	4.59252e-07	7.34804e-05
51	miRNA	hsa-miR-3662	0.330899	1.14539	-1.79138	1.72158e-09	814	0.1653	9.28499e-10	9.43355e-07
52	miRNA	hsa-miR-374a-5p	24.5221	33.9981	-0.471371	1.09628e-11	421	0.2192	3.15724e-08	1.75542e-05
53	miRNA	hsa-miR-421	2.21845	4.39772	-0.987205	1.00062e-13	448	0.16098	3.80788e-08	2.04102e-05
54	miRNA	hsa-miR-424-5p	164.899	199.402	-0.274104	4.97546e-06	920	0.11865	3.89855e-13	4.14806e-10
55	miRNA	hsa-miR-429	122.414	201.056	-0.715822	1.51429e-05	794	0.10039	1.11705e-14	9.74068e-12
56	miRNA	hsa-miR-454-3p	7.93162	15.956	-1.00841	3.64748e-22	790	0.12014	4.90187e-09	4.55384e-06
57	miRNA	hsa-miR-511	5.55651	9.40935	-0.759917	6.82745e-05	278	0.25649	3.11574e-10	1.21514e-07
58	miRNA	hsa-miR-545-5p	0.512652	1.02742	-1.00298	5.8471e-07	469	0.11526	7.22301e-10	3.74874e-07
59	miRNA	hsa-miR-548d-3p	0.111308	0.645394	-2.53562	1.42005e-09	1056	0.03332	1.88977e-10	2.15434e-07
60	miRNA	hsa-miR-548e	0.332276	0.585611	-0.81756	0.000142758	774	0.0069	6.14834e-11	4.94941e-08
61	miRNA	hsa-miR-548f	0.125759	0.420132	-1.74018	0.000339788	761	0.00021	4.53113e-10	3.59772e-07
62	miRNA	hsa-miR-570-3p	0.321463	1.00003	-1.63731	1.34475e-07	736	0.12218	1.31954e-14	1.10314e-11
63	miRNA	hsa-miR-580	0.169159	0.456596	-1.43254	1.78682e-07	285	0.20633	1.07841e-07	3.83915e-05
64	miRNA	hsa-miR-582-5p	4.46888	10.6926	-1.25863	3.77345e-09	635	0.16181	4.75993e-12	3.70323e-09
65	miRNA	hsa-miR-590-3p	3.99126	8.19911	-1.03862	3.45292e-23	696	0.17588	9.76655e-14	8.44807e-11
66	miRNA	hsa-miR-590-5p	10.3863	23.8707	-1.20055	1.26404e-25	273	0.26433	4.80645e-08	1.94181e-05
67	miRNA	hsa-miR-616-3p	0.954157	1.63543	-0.777371	1.27569e-08	149	0.19255	5.95238e-08	1.07143e-05
68	miRNA	hsa-miR-616-5p	2.12925	4.08784	-0.940995	1.38385e-17	435	0.11523	3.52305e-09	1.76153e-06
69	miRNA	hsa-miR-636	0.27323	0.643422	-1.23565	2.16019e-06	191	0.19937	5.2819e-08	1.1673e-05
70	miRNA	hsa-miR-660-5p	21.1097	32.23	-0.610495	9.12651e-15	130	0.13282	1.42607e-07	2.06781e-05
71	miRNA	hsa-miR-7-1-3p	35.9256	54.4294	-0.599375	9.19034e-05	955	0.02825	9.02277e-12	8.98668e-09
72	miRNA	hsa-miR-7-5p	1.14601	4.19134	-1.87079	9.34779e-17	381	0.15282	1.7853e-09	8.19452e-07
73	miRNA	hsa-miR-767-5p	2.64191	16.6499	-2.65585	7.00701e-10	571	0.11974	3.69236e-15	2.3225e-12
74	miRNA	hsa-miR-885-5p	1.44303	5.71028	-1.98446	0.00075842	240	0.15983	1.1662e-09	3.17206e-07
75	miRNA	hsa-miR-9-3p	1.1171	7.40058	-2.72788	1.30175e-15	738	0.10795	4.05926e-15	3.32859e-12
76	miRNA	hsa-miR-9-5p	851.474	5639.97	-2.72765	5.63017e-18	820	0.19522	3.65442e-15	3.85542e-12
77	miRNA	hsa-miR-92a-3p	7740.94	13377.6	-0.789235	2.1917e-14	392	0.30934	1.59952e-07	9.38918e-05
78	miRNA	hsa-miR-93-5p	3493.6	6594.59	-0.916569	2.27513e-23	613	0.29719	2.9545e-14	2.72701e-11
79	miRNA	hsa-miR-98	62.5847	89.3085	-0.512987	1.41908e-10	792	0.08639	1.55279e-10	1.36335e-07
80	ceRNA	PEAK1	9.06972	7.27848	0.317421	3.03495e-06	141	0.1323	6.0924e-12	8.8949e-10
81	ceRNA	SELT	68.0054	60.3285	0.172809	8.39935e-05	42	0.1182	1.71247e-07	7.19237e-06
82	ceRNA	ACVR1	31.3537	25.8509	0.278423	7.22877e-08	328	0.05647	9.55253e-13	3.2192e-10
83	ceRNA	ACVR2B	3.58911	3.26101	0.138305	0.000568277	247	0.10558	6.62535e-25	1.73584e-22
84	ceRNA	ADAM22	1.97612	1.5189	0.37964	1.75427e-05	21	0.21395	1.82451e-06	4.01392e-05
85	ceRNA	ADAMTS18	0.840246	0.583211	0.526793	9.65789e-09	25	0.63944	3.47891e-07	1.77424e-05
86	ceRNA	ADAMTS6	0.971371	0.633861	0.615856	8.94337e-09	129	0.3975	3.27545e-09	6.61642e-07
87	ceRNA	AFF1	25.2231	18.9863	0.409783	1.91567e-11	171	0.05441	1.03729e-12	1.98123e-10
88	ceRNA	AFF4	36.8163	29.1413	0.337278	4.86377e-08	544	0.09337	1.68579e-31	9.72703e-29
89	ceRNA	AFTPH	50.4905	43.162	0.22625	1.33367e-06	54	0.06327	7.19102e-07	3.88315e-05
90	ceRNA	AHNAK	214.088	142.068	0.591622	9.73639e-14	183	0.06258	1.07504e-09	2.06408e-07
91	ceRNA	AKAP11	13.7798	11.1643	0.303665	2.75942e-06	256	0.05225	1.52315e-21	3.97541e-19
92	ceRNA	AKAP9	50.6928	35.092	0.530638	1.3168e-08	238	0.11529	9.32032e-24	2.33008e-21
93	ceRNA	ANKFY1	19.7451	17.1057	0.207015	0.000242209	160	0.08656	1.58971e-13	2.7502e-11
94	ceRNA	ANKRA2	16.0305	11.7694	0.445777	2.4245e-14	357	0.10113	2.97054e-18	1.14663e-15
95	ceRNA	ANKRD28	24.2942	22.1004	0.136537	0.000805436	113	0.10476	1.39184e-13	1.60062e-11
96	ceRNA	ANKRD50	24.9212	20.8968	0.25409	4.90966e-07	377	0.0764	1.58315e-26	6.36428e-24
97	ceRNA	APPL1	29.1932	24.8122	0.23458	3.17672e-06	174	0.09361	9.2209e-22	1.66898e-19
98	ceRNA	ARFIP1	37.8456	32.7927	0.206751	5.02201e-07	242	0.05692	8.22152e-21	2.03072e-18
99	ceRNA	ARHGAP20	0.95227	0.519232	0.87499	2.32479e-16	74	0.55534	1.08383e-10	1.78832e-08
100	ceRNA	ARHGAP32	24.7198	18.7417	0.399416	1.10847e-12	41	0.27725	1.35386e-08	6.36316e-07
101	ceRNA	ARHGEF12	50.1163	37.1111	0.433429	7.14673e-12	122	0.0616	1.35037e-13	1.66096e-11
102	ceRNA	ARHGEF3	31.4788	23.3986	0.427959	1.53094e-10	85	0.29465	2.12565e-09	2.04062e-07
103	ceRNA	ARID2	14.3117	12.696	0.17282	0.000465607	362	0.08941	2.72277e-32	1.0047e-29
104	ceRNA	ARID5B	23.1038	17.1427	0.430537	3.85342e-07	258	0.2002	8.59329e-14	2.89594e-11
105	ceRNA	ASAP2	13.5167	17.8084	-0.397814	3.59101e-06	76	-0.07307	1.18794e-08	9.02837e-07
106	ceRNA	ASPN	129.659	52.9836	1.29111	1.21787e-16	36	0.52129	3.79335e-08	2.23808e-06
107	ceRNA	ATAD2B	5.39747	6.27469	-0.217262	0.000242892	368	-0.04638	2.58179e-16	9.6817e-14
108	ceRNA	ATF1	17.3882	15.7875	0.139329	0.000560732	112	0.03733	2.57918e-11	2.88868e-09
109	ceRNA	ATG14	11.4633	9.24347	0.310518	1.52574e-09	81	0.11909	4.25714e-10	3.61857e-08
110	ceRNA	ATP2A2	81.0688	93.4914	-0.205687	0.000294865	341	-0.00711	2.3994e-08	8.58983e-06
111	ceRNA	ATRN	26.0219	23.1118	0.171098	0.000813882	162	0.08667	3.88975e-18	6.41808e-16
112	ceRNA	ATXN1	14.9198	11.9287	0.322785	6.70151e-07	579	0.13916	5.69299e-29	3.75738e-26
113	ceRNA	AXIN2	6.20679	4.53619	0.452366	6.16918e-11	28	0.60597	2.86623e-07	1.60509e-05
114	ceRNA	BACH2	1.14644	1.04357	0.135628	0.000521545	495	0.02492	3.71219e-10	1.8561e-07
115	ceRNA	BAI3	0.102063	0.0533021	0.937191	9.88321e-15	41	0.61237	1.15051e-08	7.36329e-07
116	ceRNA	BAZ1A	19.5078	24.4527	-0.325942	1.84712e-07	172	-0.04084	2.67933e-14	4.60845e-12
117	ceRNA	BAZ2B	10.0472	8.51114	0.239367	2.33951e-05	440	0.12021	4.90403e-36	2.29018e-33
118	ceRNA	BBX	21.6736	19.38	0.161368	0.00081177	555	0.08753	1.59829e-44	9.35e-42
119	ceRNA	BCL2	37.1217	19.7601	0.909671	2.26839e-21	58	0.39121	8.40266e-10	6.55407e-08
120	ceRNA	BCL9	23.0646	18.6807	0.304127	3.16732e-05	54	0.14964	5.72684e-10	3.49337e-08
121	ceRNA	BCOR	25.1081	22.3225	0.169657	0.000338852	86	0.19183	4.95755e-14	4.90798e-12
122	ceRNA	BECN1	89.9136	73.3707	0.293335	1.69864e-09	97	0.08422	4.037e-11	3.91589e-09
123	ceRNA	BMI1	73.3211	58.5092	0.325567	7.6652e-09	143	0.13613	5.02411e-15	7.63664e-13
124	ceRNA	BMPR2	23.9657	18.8773	0.344322	4.33018e-09	212	0.05573	1.3862e-12	3.03579e-10
125	ceRNA	BNC2	3.07589	1.78984	0.781173	1.57062e-11	355	0.18856	2.63679e-09	1.0679e-06
126	ceRNA	BNIP3L	81.3387	57.7739	0.493524	1.46951e-14	56	0.22621	7.96392e-08	5.01727e-06
127	ceRNA	BTBD7	14.5384	12.4495	0.223788	1.96545e-05	409	0.09336	7.76668e-38	3.30084e-35
128	ceRNA	BTF3L4	40.3117	48.6181	-0.270294	1.71511e-07	60	-0.0653	9.19092e-08	5.51455e-06
129	ceRNA	BZW1	221.869	197.386	0.168689	0.000195648	105	0.14257	6.76024e-09	8.11229e-07
130	ceRNA	C16orf52	13.7264	11.0106	0.318063	1.6884e-08	519	0.07881	6.7576e-38	3.62208e-35
131	ceRNA	C16orf72	34.2442	30.0943	0.186367	0.000322354	294	0.07219	1.5676e-28	4.70279e-26
132	ceRNA	C17orf39	7.38053	6.67072	0.145881	0.000622218	32	0.12081	4.08216e-07	1.30629e-05
133	ceRNA	C20orf194	6.21749	4.82209	0.366674	1.57855e-08	120	0.13224	6.43915e-08	8.82163e-06
134	ceRNA	C5orf15	81.3063	65.9965	0.300978	1.86688e-10	64	0.13302	3.05381e-08	2.04605e-06
135	ceRNA	CAB39	60.1617	53.6278	0.165865	0.000280384	323	0.07072	2.60261e-25	8.66668e-23
136	ceRNA	CASC4	74.1729	60.4432	0.295314	1.23533e-09	115	0.10886	6.94691e-12	8.26682e-10
137	ceRNA	CASD1	36.4298	17.7182	1.03989	9.50867e-19	47	0.25073	7.11034e-08	4.1951e-06
138	ceRNA	CASZ1	15.4942	12.7189	0.284747	1.01131e-07	52	0.11492	2.63815e-08	1.39822e-06
139	ceRNA	CBFB	26.4465	34.9405	-0.401826	2.64234e-10	251	-0.1798	1.05423e-09	2.99402e-07
140	ceRNA	CBLN4	0.909007	0.33452	1.4422	3.58183e-20	63	0.56436	3.53239e-12	3.42642e-10
141	ceRNA	CCDC126	12.7974	8.24061	0.635025	4.59456e-12	32	0.16666	7.26042e-08	2.54115e-06
142	ceRNA	CCDC85A	1.57479	1.2805	0.29845	5.2952e-13	21	0.56577	2.28795e-06	7.09263e-05
143	ceRNA	CCNE1	3.73316	12.12	-1.69892	1.42779e-41	17	-0.9628	1.0261e-06	1.9496e-05
144	ceRNA	CCNE2	6.05619	17.4634	-1.52785	4.09712e-33	85	-0.24644	1.22151e-07	1.07493e-05
145	ceRNA	CCNG2	78.3614	49.9777	0.648857	1.78332e-16	25	0.20852	1.77017e-06	4.95647e-05
146	ceRNA	CCNJ	3.96819	5.71515	-0.526311	5.54678e-12	236	-0.08718	1.06918e-09	2.58742e-07
147	ceRNA	CCNT2	15.8707	14.0379	0.177037	0.00059626	534	0.07088	4.68948e-37	2.60735e-34
148	ceRNA	CDC25A	2.20961	6.54188	-1.56591	7.01777e-45	120	-0.42181	3.32161e-07	4.88277e-05
149	ceRNA	CDC42	292.575	262.071	0.158845	6.79649e-05	160	0.09038	7.95822e-17	1.32106e-14
150	ceRNA	CDK17	24.6916	19.5085	0.339921	3.64402e-10	793	0.13572	1.19344e-48	1.02517e-45
151	ceRNA	CDK8	7.98935	11.7171	-0.552463	1.19372e-11	127	-0.05585	1.91459e-07	2.50811e-05
152	ceRNA	CDKN2AIP	18.9978	16.2474	0.225623	2.56191e-06	105	0.06692	1.25349e-12	1.35377e-10
153	ceRNA	CENPO	6.62175	12.6766	-0.936878	1.68411e-34	105	-0.04883	2.6374e-08	2.82202e-06
154	ceRNA	CEP120	11.0863	8.92209	0.313331	1.40426e-07	178	0.10757	9.67775e-16	1.90652e-13
155	ceRNA	CEP55	8.63203	26.5878	-1.62299	5.14923e-54	72	-0.3616	1.17204e-08	8.9075e-07
156	ceRNA	CEP76	5.6878	7.12389	-0.324793	3.03945e-05	29	-0.16991	6.85765e-07	1.98872e-05
157	ceRNA	CERCAM	63.627	49.8969	0.350689	3.06702e-06	18	0.64873	2.83986e-06	8.51959e-05
158	ceRNA	CERS6	49.2329	42.997	0.195387	0.000144434	112	0.0503	8.88612e-09	1.06633e-06
159	ceRNA	CHD1	26.4898	21.6311	0.292328	1.2907e-06	88	0.07498	2.60171e-10	2.36755e-08
160	ceRNA	CHD6	22.4075	20.1725	0.151593	0.000364078	254	0.10041	7.31127e-17	2.13489e-14
161	ceRNA	CHD7	5.71842	9.31903	-0.704563	2.10005e-10	106	-0.23616	4.16863e-07	4.62718e-05
162	ceRNA	CHIC1	3.98791	2.81368	0.503174	6.01464e-13	173	0.16309	9.65414e-19	1.88256e-16
163	ceRNA	CIT	3.49662	6.82581	-0.965038	1.5707e-24	109	-0.23213	7.01182e-11	7.78312e-09
164	ceRNA	CLASP2	18.5461	15.3746	0.27057	2.59475e-08	192	0.09567	7.69847e-17	1.57049e-14
165	ceRNA	CLDN12	33.9728	24.318	0.482359	6.08031e-11	25	0.17957	2.45664e-06	6.38728e-05
166	ceRNA	CNOT6L	15.0439	13.1393	0.195288	2.31705e-05	536	0.11432	3.39347e-40	1.93089e-37
167	ceRNA	COG3	16.2994	14.3271	0.186071	2.96328e-05	37	0.1345	7.48587e-08	2.99435e-06
168	ceRNA	COL12A1	156.828	98.1979	0.675422	2.9836e-07	57	0.41888	5.61809e-07	5.0001e-05
169	ceRNA	COL14A1	51.7009	18.5988	1.47498	1.93691e-25	31	0.61247	2.04967e-09	1.06583e-07
170	ceRNA	COL4A3BP	18.3237	14.4591	0.341728	8.18179e-10	393	0.16408	4.57496e-20	2.09991e-17
171	ceRNA	COPS2	38.6916	35.0346	0.143238	1.18636e-05	184	0.10796	3.25429e-21	6.28077e-19
172	ceRNA	CPD	50.2568	43.1266	0.22074	5.53701e-05	151	0.05616	2.75801e-13	4.19218e-11
173	ceRNA	CPEB2	19.0421	10.716	0.829422	1.86762e-21	659	0.16739	2.35634e-31	1.77904e-28
174	ceRNA	CPEB3	2.97069	2.24012	0.407223	4.10354e-11	780	0.16121	3.62165e-50	3.18343e-47
175	ceRNA	CPEB4	18.8807	14.8862	0.342935	7.5486e-07	628	0.15044	3.96696e-36	2.80067e-33
176	ceRNA	CPED1	4.54055	4.05948	0.16157	6.65798e-12	66	0.33368	4.73073e-08	4.21035e-06
177	ceRNA	CPSF6	24.4047	27.7486	-0.185258	0.000633897	479	-0.02372	2.2822e-17	1.13197e-14
178	ceRNA	CREBBP	27.9096	22.9225	0.283997	8.78536e-07	238	0.04288	3.16873e-22	7.66833e-20
179	ceRNA	CREBL2	46.554	33.8704	0.458883	3.64684e-17	76	0.22341	6.03881e-10	4.77066e-08
180	ceRNA	CREBRF	8.72344	5.84286	0.578222	1.05115e-13	896	0.13023	2.09265e-48	2.06127e-45
181	ceRNA	CRIM1	48.0018	31.9875	0.585578	6.702e-14	220	0.19325	2.45813e-23	6.1699e-21
182	ceRNA	CSNK1G1	11.527	9.73545	0.243703	0.000101115	180	0.08245	4.02219e-16	7.40082e-14
183	ceRNA	CSNK1G3	20.9038	15.8238	0.401667	2.50807e-12	243	0.16331	7.65827e-21	2.06007e-18
184	ceRNA	CSRNP2	27.0805	24.2903	0.156875	0.000312646	59	0.04638	3.38079e-07	2.02848e-05
185	ceRNA	CTGF	313.878	200.292	0.648105	1.08382e-09	13	0.53612	2.98246e-06	4.77194e-05
186	ceRNA	CTTNBP2	1.5882	0.814194	0.963947	2.3312e-14	67	0.43442	1.49567e-07	1.61532e-05
187	ceRNA	CUL3	28.9936	26.4519	0.132362	0.000311769	334	0.05425	4.71362e-24	1.63563e-21
188	ceRNA	CXCL12	120.115	67.414	0.8333	2.08991e-15	58	0.43723	3.00598e-07	2.76551e-05
189	ceRNA	DAZAP2	335.136	277.62	0.271635	1.15456e-09	166	0.12166	5.85843e-08	1.11896e-05
190	ceRNA	DCAF8	67.8706	57.8862	0.229568	8.72667e-08	97	0.06424	1.01152e-08	1.0014e-06
191	ceRNA	DCLK1	15.7769	8.36487	0.915402	3.59359e-10	182	0.29468	1.05357e-19	2.22304e-17
192	ceRNA	DCP1A	11.0919	9.70876	0.192153	6.98489e-05	279	0.0887	1.40468e-22	4.03145e-20
193	ceRNA	DCUN1D1	17.6169	20.9731	-0.251579	0.000794999	197	-0.03741	6.9409e-08	1.409e-05
194	ceRNA	DCUN1D3	6.31316	5.27573	0.258992	6.1502e-07	170	0.08503	2.41426e-12	4.22496e-10
195	ceRNA	DENND4C	22.279	18.8611	0.240276	7.99342e-06	222	0.03538	3.86232e-20	8.61298e-18
196	ceRNA	DHX29	26.937	24.0423	0.164014	2.51856e-05	41	0.1919	3.20828e-09	1.47581e-07
197	ceRNA	DICER1	22.4233	17.757	0.336609	1.1196e-06	357	0.08689	1.8064e-31	6.73789e-29
198	ceRNA	DIXDC1	17.0154	10.1605	0.743865	1.26457e-21	101	0.09271	8.61883e-09	9.04977e-07
199	ceRNA	DLC1	17.6137	10.7595	0.711077	2.32072e-15	160	0.42936	4.16078e-13	1.28568e-10
200	ceRNA	DMXL1	14.9111	12.055	0.30675	1.25958e-08	141	0.13479	1.72066e-17	2.46055e-15
201	ceRNA	DNAJB4	14.0522	12.5535	0.162701	0.000859613	147	0.03925	1.4502e-07	2.29131e-05
202	ceRNA	DNAJC16	14.6464	11.4979	0.349176	4.32948e-11	129	0.0225	2.60567e-11	3.41342e-09
203	ceRNA	DPY19L3	14.3584	12.6204	0.186144	8.37422e-05	80	0.13757	8.86894e-09	7.18384e-07
204	ceRNA	DUSP1	194.954	104.589	0.898395	1.15261e-11	13	0.61373	1.52383e-06	2.89527e-05
205	ceRNA	E2F3	8.51718	15.3564	-0.850389	1.77262e-16	275	-0.22995	9.37258e-08	2.96174e-05
206	ceRNA	E2F5	13.4194	19.0328	-0.504166	1.10737e-06	111	-0.15148	2.40474e-07	2.74141e-05
207	ceRNA	E2F7	1.17844	3.11311	-1.40148	2.04507e-27	48	-0.47569	6.19121e-08	3.15752e-06
208	ceRNA	EBF3	1.76545	1.04673	0.754148	5.00643e-15	100	0.5452	1.39207e-10	2.74237e-08
209	ceRNA	EED	17.0326	21.4612	-0.333436	4.07069e-06	50	-0.33136	7.06876e-07	3.60507e-05
210	ceRNA	EGR3	15.3023	6.22627	1.29731	1.0772e-17	52	0.54626	6.4726e-11	6.08424e-09
211	ceRNA	ELF1	50.3291	39.7166	0.341652	3.0397e-10	61	0.06818	1.1676e-08	7.23913e-07
212	ceRNA	ELF2	27.0955	23.6719	0.194875	1.03292e-06	91	0.09755	2.33071e-11	2.26079e-09
213	ceRNA	ELK3	23.5576	17.461	0.432053	4.48375e-09	682	0.04946	1.26027e-22	8.72108e-20
214	ceRNA	EMX2	0.770959	0.679522	0.182134	6.09174e-06	26	0.33108	3.60047e-08	9.36122e-07
215	ceRNA	EPC2	16.4724	14.8929	0.14543	8.81274e-05	411	0.05232	1.10203e-31	4.67263e-29
216	ceRNA	EPHA3	2.69211	1.94654	0.467826	4.65726e-11	59	0.54444	8.52205e-09	9.62992e-07
217	ceRNA	ERBB2IP	35.8998	30.3104	0.24416	5.39401e-07	469	0.08914	1.5878e-34	7.92312e-32
218	ceRNA	ETNK1	21.6439	19.5158	0.149315	0.000742676	188	0.07246	2.1189e-18	4.00473e-16
219	ceRNA	EVI5	5.02553	4.37401	0.200317	0.000431498	58	0.10795	2.56482e-07	1.71843e-05
220	ceRNA	EYA4	0.307604	0.27656	0.15348	2.65998e-08	62	0.47179	1.36822e-09	1.32718e-07
221	ceRNA	EZH1	15.8169	11.9371	0.406016	5.11348e-12	92	0.03398	2.27541e-07	2.16164e-05
222	ceRNA	FAM116A	14.6668	13.2602	0.145454	0.000688093	138	0.07668	1.73133e-16	2.40655e-14
223	ceRNA	FAM120A	134.817	120.208	0.165475	4.17654e-05	243	0.10455	8.23784e-19	2.16655e-16
224	ceRNA	FAM13B	15.6008	12.2126	0.353243	1.23054e-08	301	0.09819	2.65009e-28	8.29477e-26
225	ceRNA	FAM13C	2.24479	1.52309	0.559573	2.37812e-06	40	0.5941	8.6617e-08	8.05538e-06
226	ceRNA	FAM179B	9.48735	7.35545	0.367192	8.39595e-11	584	0.1176	3.2547e-29	2.12207e-26
227	ceRNA	FAM208A	23.729	20.323	0.223538	1.81854e-07	67	0.04391	6.4132e-09	4.29684e-07
228	ceRNA	FAM40A	18.5101	16.8941	0.131793	0.000623867	26	0.1739	8.61806e-07	2.41306e-05
229	ceRNA	FAM63B	5.2611	4.27417	0.29972	6.73467e-05	149	0.07667	8.71245e-14	1.35914e-11
230	ceRNA	FAM91A1	27.2917	35.1975	-0.36701	7.78969e-05	193	-0.01994	3.06108e-09	6.06093e-07
231	ceRNA	FBXL17	12.8252	9.23469	0.473843	8.3905e-13	220	0.11907	5.43412e-20	1.24441e-17
232	ceRNA	FBXL3	41.5791	27.5591	0.593332	2.84813e-17	108	0.09866	1.81122e-13	2.04668e-11
233	ceRNA	FBXO21	29.1833	26.4796	0.140261	0.000362071	83	0.13059	1.44666e-08	1.33093e-06
234	ceRNA	FBXO38	20.7398	17.0701	0.280926	1.4265e-09	63	0.03049	4.05593e-08	2.63635e-06
235	ceRNA	FCHO2	17.7171	13.7684	0.363782	1.77624e-09	224	0.12166	5.14473e-21	1.19872e-18
236	ceRNA	FEM1C	16.7286	12.9622	0.368013	3.61441e-11	190	0.11623	3.07446e-16	6.36414e-14
237	ceRNA	FERMT2	29.5783	24.6021	0.265761	0.000259174	355	0.07429	1.08926e-10	3.96491e-08
238	ceRNA	FILIP1L	27.0669	19.3114	0.487079	3.57978e-08	83	0.61229	3.39571e-09	7.09704e-07
239	ceRNA	FMR1	23.0316	28.8928	-0.327094	3.73155e-06	632	-0.00533	1.54395e-19	1.01283e-16
240	ceRNA	FNDC3A	22.8637	18.14	0.333883	8.90248e-08	496	0.084	9.72824e-32	5.03923e-29
241	ceRNA	FNIP1	15.4353	11.8537	0.380902	5.03628e-10	159	0.08117	4.68234e-11	7.63221e-09
242	ceRNA	FOXF2	2.67314	2.23553	0.25792	7.17112e-08	62	0.25658	1.78742e-07	1.19757e-05
243	ceRNA	FOXO1	10.6797	7.51375	0.507259	2.78059e-12	239	0.29637	6.96791e-15	2.39696e-12
244	ceRNA	FOXP1	35.8294	25.2434	0.505234	6.08219e-16	317	0.21374	3.0884e-11	1.23227e-08
245	ceRNA	FRMD4B	10.7288	8.85912	0.276258	6.93382e-06	40	0.35539	5.30363e-07	2.38663e-05
246	ceRNA	FRMD6	47.3791	27.7513	0.771696	2.36457e-17	329	0.0624	2.29898e-17	7.90847e-15
247	ceRNA	FRS2	24.7777	23.2824	0.0898008	1.35004e-07	671	0.14364	1.19945e-37	9.05585e-35
248	ceRNA	FRY	21.6741	13.4263	0.690909	4.53086e-20	81	0.26203	2.05622e-07	1.93284e-05
249	ceRNA	FRYL	28.0656	23.8268	0.236217	2.96328e-05	280	0.10893	6.52947e-25	1.91313e-22
250	ceRNA	FSTL1	210.806	145.338	0.536504	7.36787e-10	85	0.3702	2.38823e-07	3.17634e-05
251	ceRNA	FYCO1	18.2103	12.8754	0.500136	6.88845e-16	79	-0.02966	1.08326e-06	8.99103e-05
252	ceRNA	GAB1	10.4955	9.3676	0.164027	0.000137035	31	0.06114	2.90619e-06	9.00919e-05
253	ceRNA	GALNT7	63.4387	50.8052	0.320385	2.41213e-06	107	0.34597	4.23046e-11	6.26108e-09
254	ceRNA	GALNTL2	5.72125	2.78168	1.04037	3.81932e-15	17	0.59401	1.51083e-08	3.47491e-07
255	ceRNA	GAN	1.08708	1.63214	-0.586307	8.6244e-07	135	-0.06871	4.2498e-08	5.73723e-06
256	ceRNA	GIGYF2	28.3114	24.5321	0.206714	7.24419e-05	98	0.08214	6.87433e-12	6.73684e-10
257	ceRNA	GIT2	24.7187	22.0635	0.163937	5.19004e-05	219	0.07186	2.93512e-12	6.95623e-10
258	ceRNA	GLCCI1	10.7841	8.31167	0.375695	9.48938e-08	161	0.14416	5.57442e-14	9.75524e-12
259	ceRNA	GLCE	31.0274	24.8355	0.321142	1.68712e-06	79	0.11723	1.74546e-09	1.43127e-07
260	ceRNA	GNPDA2	16.6199	13.1871	0.333777	2.13989e-10	191	0.0825	6.88098e-21	1.32115e-18
261	ceRNA	GOLT1B	24.2516	32.5692	-0.425427	6.85454e-09	113	-0.06418	6.32712e-08	7.27618e-06
262	ceRNA	GPM6A	6.17733	3.36121	0.878006	3.50393e-12	39	0.57085	6.78896e-10	4.07338e-08
263	ceRNA	GRM5	0.0285052	0.0243362	0.228121	7.81316e-05	42	0.59602	9.9791e-10	8.08307e-08
264	ceRNA	HBP1	83.6966	61.5967	0.442315	3.02112e-19	338	0.1211	2.8614e-30	1.03583e-27
265	ceRNA	HECTD2	9.08696	7.03398	0.369456	2.94025e-06	347	0.15356	8.93628e-35	3.28855e-32
266	ceRNA	HERC1	16.6523	13.6827	0.283368	0.000251979	67	0.09975	1.4831e-08	9.93678e-07
267	ceRNA	HERC3	13.0675	10.2528	0.349967	4.36333e-06	44	0.12854	4.32458e-09	1.94606e-07
268	ceRNA	HIPK3	25.4818	21.7167	0.230664	0.000585227	239	0.12495	8.76168e-22	2.23423e-19
269	ceRNA	HMBOX1	4.53479	3.37118	0.427782	1.51429e-05	293	0.09236	1.12085e-28	3.39617e-26
270	ceRNA	HNRNPH2	142.416	104.082	0.452398	3.10959e-20	141	0.14715	4.209e-15	6.43977e-13
271	ceRNA	HNRNPH3	72.3967	87.4229	-0.272087	2.27871e-09	96	-0.09714	2.0752e-09	2.01294e-07
272	ceRNA	HOXA9	4.35595	3.57203	0.286244	2.53493e-06	94	0.50008	1.92605e-10	3.23577e-08
273	ceRNA	HOXD8	19.8527	12.3726	0.682189	1.58138e-09	43	0.59251	1.15691e-08	9.8337e-07
274	ceRNA	HSPA8	1025.06	1171.13	-0.192188	0.000289152	150	-0.09252	3.89025e-07	5.95208e-05
275	ceRNA	IGF1	10.0277	4.93896	1.02171	6.7624e-18	114	0.5618	3.1212e-13	7.80299e-11
276	ceRNA	IKZF4	4.68936	3.85279	0.28349	6.75119e-08	173	0.1571	3.89116e-17	6.77061e-15
277	ceRNA	IL6ST	198.268	119.392	0.731742	1.1834e-17	87	-0.018	1.01573e-08	8.83687e-07
278	ceRNA	INTS6	12.1357	11.0571	0.13428	0.000557728	123	0.07219	5.15818e-14	6.4993e-12
279	ceRNA	IPO11	23.2942	19.6641	0.244405	1.61892e-08	65	0.04794	1.99399e-09	1.31603e-07
280	ceRNA	IRF2BPL	35.8371	28.3779	0.336689	4.05385e-10	117	0.14454	6.43559e-12	7.98013e-10
281	ceRNA	IRS1	16.3501	11.2023	0.545509	4.14387e-11	70	0.21091	1.65047e-11	1.15533e-09
282	ceRNA	IRS2	9.108	8.17754	0.155468	4.40895e-06	18	0.77245	2.83773e-08	1.04996e-06
283	ceRNA	ITPR1	41.4561	22.8769	0.857691	1.22449e-12	147	0.19816	9.65847e-10	1.67092e-07
284	ceRNA	JAK1	113.794	91.474	0.314996	1.02954e-08	111	0.01162	1.51551e-07	1.71253e-05
285	ceRNA	JAZF1	9.91898	8.42465	0.235575	2.71071e-05	266	0.19779	3.09911e-12	9.70022e-10
286	ceRNA	KANSL1	23.755	21.0111	0.177085	7.28807e-05	153	0.06914	6.35602e-12	1.00425e-09
287	ceRNA	KAT6B	24.9218	20.3575	0.29185	2.61371e-12	287	0.17312	9.25064e-20	3.05271e-17
288	ceRNA	KCND2	3.39382	2.2823	0.572425	1.30284e-10	31	0.44655	1.78154e-06	8.72952e-05
289	ceRNA	KDR	15.2527	12.0442	0.340726	5.44082e-06	16	0.4096	2.72734e-06	5.18194e-05
290	ceRNA	KIAA0240	12.792	11.3966	0.166632	0.000172396	337	0.09981	6.97834e-33	2.43544e-30
291	ceRNA	KIAA0355	10.3344	9.16663	0.172996	0.000146978	187	0.06489	8.55968e-14	1.66058e-11
292	ceRNA	KIAA0494	77.2893	62.1289	0.315004	1.12948e-10	213	0.08129	9.34084e-18	2.18576e-15
293	ceRNA	KIAA1109	31.7466	25.7736	0.30071	8.03934e-07	116	0.0838	1.84613e-13	2.15997e-11
294	ceRNA	KIAA1217	53.5578	45.8669	0.223645	2.03014e-05	128	0.06685	1.27244e-10	1.64144e-08
295	ceRNA	KIAA2026	13.3165	11.5923	0.200046	6.43375e-05	72	0.07244	4.04656e-08	3.07539e-06
296	ceRNA	KIF13A	35.9096	27.8821	0.365031	1.07339e-07	157	0.05007	2.96848e-13	4.71989e-11
297	ceRNA	KIF16B	28.4705	23.4569	0.279451	9.52711e-08	66	0.29911	2.92861e-09	2.37217e-07
298	ceRNA	KIF21A	9.44631	14.6414	-0.632232	2.69588e-12	64	-0.16648	2.27227e-08	1.47697e-06
299	ceRNA	KIF23	10.3007	24.977	-1.27787	1.21229e-38	119	-0.23503	1.52071e-08	1.91609e-06
300	ceRNA	KLF12	4.07679	3.53454	0.205908	0.000762418	275	0.12222	1.26927e-17	3.69359e-15
301	ceRNA	KLF9	20.2957	13.8762	0.548561	1.3168e-08	133	0.33548	7.7103e-11	1.4958e-08
302	ceRNA	KLHL28	6.52163	5.7283	0.187125	1.80638e-05	228	0.13881	7.25525e-20	1.85009e-17
303	ceRNA	KPNA2	104.397	231.219	-1.14718	1.56164e-41	23	-0.74059	3.68851e-07	9.95898e-06
304	ceRNA	KPNA4	43.0962	52.4045	-0.28213	8.60539e-09	430	-0.05869	1.89711e-19	8.42317e-17
305	ceRNA	LARP4B	24.7095	31.9915	-0.372622	8.44656e-10	247	-0.01723	2.91502e-13	7.31669e-11
306	ceRNA	LATS2	8.16324	6.70297	0.284342	3.04921e-05	99	0.24929	1.45885e-08	1.83815e-06
307	ceRNA	LEF1	26.3519	17.1804	0.617146	2.60567e-10	33	0.49156	5.74751e-09	2.64385e-07
308	ceRNA	LIMA1	85.579	61.5883	0.4746	1.46575e-13	136	0.06331	5.32393e-11	7.40026e-09
309	ceRNA	LIN54	5.49928	6.60324	-0.263933	0.000762418	220	-0.02675	1.80324e-11	4.07532e-09
310	ceRNA	LIN9	5.36119	8.92517	-0.735324	7.41935e-21	53	-0.30508	2.88596e-08	1.64499e-06
311	ceRNA	LRCH1	11.1826	8.84232	0.338757	3.96828e-09	326	0.14826	1.60069e-18	5.71445e-16
312	ceRNA	LRCH2	0.779251	0.556406	0.485951	1.93857e-10	229	0.21357	3.69855e-11	9.1724e-09
313	ceRNA	LRRC17	18.683	7.25731	1.36422	1.73161e-27	48	0.60723	1.16277e-07	1.47672e-05
314	ceRNA	LYSMD3	13.9862	12.1522	0.202783	7.31011e-05	249	-0.00439	5.39702e-14	1.39243e-11
315	ceRNA	LYST	13.34	11.3913	0.227838	3.87448e-05	62	0.12236	1.95927e-08	1.27353e-06
316	ceRNA	MAB21L1	1.16231	0.478256	1.28114	8.28995e-23	37	0.80549	2.991e-08	3.85839e-06
317	ceRNA	MAGI1	11.1539	8.65542	0.365867	9.50488e-10	426	0.13279	7.01561e-37	3.2342e-34
318	ceRNA	MAGI3	25.51	18.838	0.437418	6.22794e-08	70	0.17279	2.05176e-07	1.51831e-05
319	ceRNA	MAML3	5.71683	4.20491	0.443141	1.52878e-14	57	0.22438	7.41617e-07	5.04299e-05
320	ceRNA	MAP2K4	28.5837	20.2499	0.497277	8.5178e-11	131	0.12442	3.41737e-13	4.64762e-11
321	ceRNA	MAP3K1	30.8203	18.2081	0.759304	2.59515e-17	614	0.11184	5.96745e-43	3.7953e-40
322	ceRNA	MAPRE1	110.339	132.411	-0.263081	6.88832e-08	217	-0.06415	2.18323e-11	4.80311e-09
323	ceRNA	MARCH8	16.765	10.7862	0.636276	1.50932e-10	204	0.09064	5.50051e-18	1.16061e-15
324	ceRNA	MAST4	23.7828	15.8467	0.585737	4.81205e-17	181	0.27771	1.29148e-09	3.13829e-07
325	ceRNA	MASTL	7.81955	13.5535	-0.793506	9.39325e-28	99	-0.11041	1.0375e-09	1.0375e-07
326	ceRNA	MAT2B	67.606	56.7121	0.253493	2.9836e-07	164	0.02076	8.63245e-11	1.45025e-08
327	ceRNA	MATR3	200.138	184.241	0.119402	0.000734918	179	0.0355	5.17639e-15	9.52456e-13
328	ceRNA	MBD5	8.39484	7.21812	0.217881	2.18343e-06	107	0.07223	3.74266e-16	4.07949e-14
329	ceRNA	MED13L	42.7759	31.7654	0.429339	3.77679e-11	212	0.15005	5.42318e-17	1.29072e-14
330	ceRNA	MEF2C	9.11226	7.22003	0.335804	7.40526e-08	186	0.21747	2.0584e-07	4.61082e-05
331	ceRNA	MGEA5	94.0894	81.5513	0.206323	1.55278e-06	145	0.08576	1.69913e-13	2.66764e-11
332	ceRNA	MIER1	18.1852	16.0496	0.180229	5.09469e-05	287	0.04582	5.43869e-27	1.57722e-24
333	ceRNA	MIER3	12.9843	11.0236	0.236176	1.92765e-05	854	0.08705	3.62655e-51	3.36181e-48
334	ceRNA	MITF	6.23785	5.1394	0.279448	0.000124389	275	0.2755	1.88064e-13	6.82671e-11
335	ceRNA	MKL2	32.2264	24.384	0.402307	2.34612e-11	405	0.12336	7.29461e-28	3.07103e-25
336	ceRNA	MLL	28.5598	25.4587	0.165827	4.51482e-05	296	0.10758	6.89635e-33	2.04822e-30
337	ceRNA	MLL5	39.2589	33.884	0.212417	0.000129236	290	0.09366	5.53532e-33	1.61078e-30
338	ceRNA	MLLT10	16.4535	21.0319	-0.35418	1.56971e-06	200	-0.00125	6.95775e-09	1.41938e-06
339	ceRNA	MNT	10.7301	9.51395	0.173552	5.96023e-05	32	0.05679	1.90254e-06	6.08814e-05
340	ceRNA	MPHOSPH9	5.3649	7.58536	-0.499667	9.04838e-07	138	-0.02418	1.55181e-07	2.17254e-05
341	ceRNA	MSX1	3.34265	2.39756	0.479425	7.5537e-11	6	0.74335	9.51106e-07	5.70663e-06
342	ceRNA	MTDH	47.5619	63.9432	-0.426984	1.49453e-08	203	-0.04665	2.94365e-09	6.06392e-07
343	ceRNA	MTMR9	5.18513	4.1268	0.329358	1.01215e-08	87	0.07107	1.84374e-08	1.62249e-06
344	ceRNA	MYB	66.2705	40.1827	0.721794	1.0336e-16	139	0.28769	2.47375e-07	4.55169e-05
345	ceRNA	MYLIP	32.9786	25.96	0.345242	7.43494e-08	78	0.05262	3.1802e-08	2.51236e-06
346	ceRNA	NAA15	19.7562	24.3122	-0.299375	3.70553e-06	400	-0.05229	1.36191e-25	5.52934e-23
347	ceRNA	NAA50	76.6435	97.1625	-0.342236	1.16197e-07	137	-0.01179	5.03769e-09	6.95201e-07
348	ceRNA	NAV3	3.44753	1.27107	1.43952	6.03818e-19	367	0.17618	2.2815e-15	9.51386e-13
349	ceRNA	NBEA	6.88465	4.41094	0.642298	5.02135e-13	451	0.15835	4.77035e-25	2.47104e-22
350	ceRNA	NCOA1	27.1733	22.9696	0.242465	4.8441e-08	140	0.12053	6.97822e-13	1.01184e-10
351	ceRNA	NEDD4	8.2735	6.83853	0.274811	1.00108e-05	215	0.05688	1.20301e-11	2.68272e-09
352	ceRNA	NEDD4L	21.7007	18.6915	0.215357	1.17837e-06	28	0.23854	1.66752e-06	5.16932e-05
353	ceRNA	NEGR1	5.39692	2.67973	1.01005	4.74866e-20	162	0.34683	7.98299e-12	1.86004e-09
354	ceRNA	NEK9	42.4565	32.7632	0.373909	8.4269e-15	293	0.07727	1.01096e-16	3.24517e-14
355	ceRNA	NF1	23.9791	23.372	0.0369983	0.000958305	292	0.09252	1.1069e-25	3.30963e-23
356	ceRNA	NFATC3	17.5686	20.5976	-0.229481	0.000627179	197	0.00595	2.28326e-08	4.49803e-06
357	ceRNA	NHS	2.76763	2.37267	0.222138	0.000980755	77	0.10353	2.92912e-07	2.3433e-05
358	ceRNA	NOVA1	15.2101	10.2132	0.574593	2.27268e-13	125	0.67656	2.67904e-18	7.60846e-16
359	ceRNA	NPAS3	1.23675	0.741836	0.737382	8.76147e-08	66	0.38577	1.84739e-07	1.77349e-05
360	ceRNA	NPTN	124.678	107.007	0.220507	1.10274e-05	141	0.11534	2.79847e-15	3.97383e-13
361	ceRNA	NR3C1	26.1095	20.4155	0.354907	2.16555e-05	268	0.05484	8.89363e-15	2.40128e-12
362	ceRNA	NR5A2	1.91859	1.12852	0.765616	1.3867e-11	124	0.41184	4.59356e-08	9.73835e-06
363	ceRNA	NRIP1	43.8059	28.1595	0.637503	2.46563e-14	155	0.07392	1.26825e-13	2.01652e-11
364	ceRNA	NUMB	44.7435	40.0758	0.158947	9.78549e-05	61	0.12097	3.48383e-08	2.12513e-06
365	ceRNA	NUS1	21.4698	27.7731	-0.371379	9.38806e-07	120	-0.16569	1.80956e-08	2.20767e-06
366	ceRNA	ODZ3	3.70022	2.01438	0.877277	1.30019e-08	222	0.16107	5.89474e-09	1.40884e-06
367	ceRNA	OSBPL11	9.32569	10.7075	-0.199338	0.000167003	198	-0.02138	5.25609e-08	1.09327e-05
368	ceRNA	OTUD1	11.0361	9.51566	0.213849	3.49295e-05	73	0.08174	3.98084e-11	2.90601e-09
369	ceRNA	PALLD	123.519	91.0542	0.439931	1.6884e-08	174	0.20092	7.10128e-11	1.41316e-08
370	ceRNA	PAN3	22.9921	18.5895	0.306651	2.32272e-07	302	0.11573	2.93601e-29	9.65948e-27
371	ceRNA	PAPD4	28.0357	22.8879	0.29268	4.7862e-09	321	0.06416	4.17209e-26	1.37679e-23
372	ceRNA	PARD6B	22.4854	18.3181	0.295717	5.89559e-12	42	0.38839	3.64438e-07	2.11374e-05
373	ceRNA	PCDH19	3.56517	1.72429	1.04797	4.17666e-17	165	0.21174	1.30493e-09	2.46631e-07
374	ceRNA	PCMTD1	71.7746	60.4404	0.247959	0.000931494	57	0.1322	1.98878e-09	1.19327e-07
375	ceRNA	PDCD6IP	64.9246	57.0561	0.186385	2.59218e-05	44	0.12234	1.3622e-06	6.81098e-05
376	ceRNA	PDZRN4	2.32546	0.422555	2.46031	5.81746e-16	16	0.66967	1.01232e-06	1.92341e-05
377	ceRNA	PHF15	23.03	15.2467	0.595014	1.13267e-14	63	0.15877	2.40173e-07	1.60916e-05
378	ceRNA	PHF17	13.1063	11.4641	0.193139	2.03014e-05	42	0.216	1.22228e-07	5.13358e-06
379	ceRNA	PHF2	26.8582	23.7377	0.178183	3.09956e-06	147	0.09069	2.04951e-19	3.11526e-17
380	ceRNA	PHF20L1	21.6791	26.1819	-0.272265	0.000103857	330	-0.01696	2.42739e-16	8.13177e-14
381	ceRNA	PHF6	17.0341	20.7545	-0.285001	4.37647e-05	332	-0.00801	7.94806e-09	2.75798e-06
382	ceRNA	PHTF2	13.6113	15.9268	-0.226657	0.000647488	327	-0.02044	2.84228e-13	9.72061e-11
383	ceRNA	PIK3C2A	21.7902	19.0651	0.192744	0.000372185	405	0.08278	9.90005e-34	4.10852e-31
384	ceRNA	PJA2	64.3201	47.1879	0.446852	1.31739e-12	292	0.14745	8.48522e-22	2.80012e-19
385	ceRNA	PLAGL2	9.92314	11.6945	-0.236964	0.000387844	107	-0.03364	1.69194e-08	1.8273e-06
386	ceRNA	PLCL1	6.56131	3.86653	0.762943	4.76551e-09	9	0.60013	7.54835e-06	8.30319e-05
387	ceRNA	PLDN	28.1704	25.5813	0.139086	0.000289152	56	0.02948	1.99378e-08	1.11652e-06
388	ceRNA	PLEKHA3	14.7244	12.4671	0.240087	6.26111e-09	248	0.13238	1.94455e-30	5.01693e-28
389	ceRNA	PLEKHF2	74.0814	69.6073	0.0898728	0.000535739	97	0.0645	9.9669e-08	1.00666e-05
390	ceRNA	POLK	12.4607	9.37668	0.410232	4.8541e-10	37	0.18146	5.92304e-11	2.19153e-09
391	ceRNA	POLQ	1.05492	2.88009	-1.44898	2.5204e-43	54	-0.26656	7.64607e-08	4.20534e-06
392	ceRNA	PPAP2B	36.9671	29.1635	0.342076	8.50095e-05	131	0.22197	1.73396e-07	2.63562e-05
393	ceRNA	PPM1A	25.0555	21.5776	0.215589	2.49033e-06	397	0.1049	9.63131e-31	4.03552e-28
394	ceRNA	PPP1R2	38.5711	35.7763	0.108518	0.000914793	49	0.1242	9.76808e-09	5.0794e-07
395	ceRNA	PPP2R2A	48.7884	41.2536	0.242019	9.1081e-05	157	0.09173	9.8765e-15	1.679e-12
396	ceRNA	PPP2R5A	79.8607	69.1397	0.207973	0.000411931	25	0.1599	1.65046e-06	4.12615e-05
397	ceRNA	PPP3CB	50.6418	44.0478	0.201259	6.67004e-08	76	0.12146	2.72541e-07	2.18033e-05
398	ceRNA	PPP3R1	48.7618	56.656	-0.216475	7.10061e-06	439	-0.06356	5.82232e-17	2.62586e-14
399	ceRNA	PPP6C	44.1741	40.1905	0.136346	1.4087e-05	388	0.0924	1.86524e-30	7.62884e-28
400	ceRNA	PRDM2	24.5693	21.1001	0.219606	5.96861e-07	155	0.18942	4.64315e-15	8.68268e-13
401	ceRNA	PRICKLE2	9.00839	5.17246	0.800419	2.17501e-19	133	0.1521	4.22779e-09	6.34168e-07
402	ceRNA	PRTG	0.78448	0.585932	0.421002	5.49619e-10	147	0.27529	2.81668e-08	5.83053e-06
403	ceRNA	PSD3	19.5258	8.50889	1.19834	1.46369e-15	24	0.2735	1.19551e-06	2.98878e-05
404	ceRNA	PSEN1	36.6677	31.2411	0.231066	1.60472e-07	62	0.08243	6.18847e-08	3.96062e-06
405	ceRNA	PTEN	35.4663	29.1403	0.283434	4.21711e-08	571	0.10234	5.18447e-33	3.11587e-30
406	ceRNA	PTPN13	14.4042	9.66491	0.575658	3.56517e-08	136	0.0857	1.84405e-13	2.5448e-11
407	ceRNA	PTPN4	6.42791	7.39312	-0.201834	0.000416456	166	-0.01086	9.96378e-12	1.65399e-09
408	ceRNA	PTPRD	2.04724	1.55325	0.398395	0.000907717	235	0.1622	2.96045e-09	7.46034e-07
409	ceRNA	PTPRG	12.7908	8.75396	0.547096	3.58816e-09	149	0.13719	2.92705e-12	4.53693e-10
410	ceRNA	PURA	12.6485	10.3149	0.294241	2.78392e-08	400	0.11039	6.55862e-29	2.81365e-26
411	ceRNA	PWWP2A	10.6206	9.55929	0.151887	0.000183676	236	0.10122	3.13934e-18	7.69138e-16
412	ceRNA	QSER1	12.1182	15.0595	-0.313498	0.000534308	269	-0.02592	1.0942e-12	2.99812e-10
413	ceRNA	R3HDM1	16.4215	21.4597	-0.38604	3.46807e-12	123	-0.10738	2.93986e-08	3.70423e-06
414	ceRNA	RAB11A	186.205	156.701	0.248877	5.61157e-06	54	0.19436	4.52496e-10	2.80548e-08
415	ceRNA	RAB11FIP2	6.11512	5.21072	0.230897	6.51271e-05	127	0.11096	4.95523e-10	6.59045e-08
416	ceRNA	RAB14	67.3513	61.3707	0.134156	0.000731054	146	0.10114	5.34574e-17	7.80477e-15
417	ceRNA	RAB5B	145.119	125.105	0.214102	4.41083e-08	122	0.10157	1.35669e-09	1.83153e-07
418	ceRNA	RAB8B	12.2732	10.4436	0.232895	6.13363e-06	268	0.12545	2.23353e-13	6.72292e-11
419	ceRNA	RABEP1	87.0027	55.5907	0.646218	2.17686e-15	197	0.16561	5.24503e-18	1.14866e-15
420	ceRNA	RACGAP1	20.4251	41.6061	-1.02645	5.77881e-34	159	-0.05499	6.8715e-10	1.09944e-07
421	ceRNA	RAD21	198.345	282.648	-0.510994	6.02482e-10	189	-0.04483	2.74028e-08	5.31615e-06
422	ceRNA	RALGPS1	6.43529	5.65572	0.186294	0.000102938	61	0.13392	5.76038e-08	3.57143e-06
423	ceRNA	RANBP9	46.4094	55.8226	-0.266432	6.02985e-06	80	-0.13557	4.76087e-07	3.85631e-05
424	ceRNA	RAP1B	106.566	96.8677	0.137659	0.000200759	240	0.16628	3.02836e-27	7.87373e-25
425	ceRNA	RAPGEF4	5.6975	3.83076	0.572697	3.88754e-13	85	0.2652	5.58296e-14	5.58296e-12
426	ceRNA	RASA1	30.5615	24.4019	0.324726	5.31356e-07	263	0.08313	8.97968e-16	2.48737e-13
427	ceRNA	RASSF8	10.2318	8.75824	0.224344	0.000369122	88	0.18651	2.93926e-10	2.7923e-08
428	ceRNA	RB1	24.1793	19.6907	0.296257	2.51904e-07	173	0.08961	1.9419e-11	3.65078e-09
429	ceRNA	RBL2	37.4886	31.9164	0.232152	2.1241e-05	244	0.08593	7.69582e-18	2.09326e-15
430	ceRNA	RBM24	11.9054	8.52455	0.481925	5.23944e-13	47	0.52714	1.04279e-09	6.9867e-08
431	ceRNA	RBM47	59.1869	47.1941	0.326671	9.61637e-09	137	0.12916	7.28514e-08	1.12191e-05
432	ceRNA	RBM5	60.3885	46.8931	0.364897	8.27347e-12	69	0.11811	2.57251e-08	1.87793e-06
433	ceRNA	RCN2	49.1457	61.5562	-0.324838	2.45526e-06	71	-0.0581	7.4304e-08	5.27559e-06
434	ceRNA	RCOR3	36.3301	29.2892	0.310794	5.83811e-08	223	0.10011	2.85186e-19	6.67336e-17
435	ceRNA	RECK	8.76662	6.5261	0.4258	1.62209e-05	240	0.08972	1.81688e-09	4.39686e-07
436	ceRNA	REEP1	11.8668	8.66767	0.453216	1.78416e-09	58	0.48991	3.58113e-10	3.36626e-08
437	ceRNA	RFX7	8.66469	7.33936	0.239493	2.551e-05	539	0.1	6.39348e-38	3.59313e-35
438	ceRNA	RGMB	14.8218	12.3329	0.265204	2.12473e-07	66	0.03481	6.51246e-07	4.55872e-05
439	ceRNA	RHOBTB1	14.2329	12.4092	0.197824	1.89659e-05	17	0.33809	2.24997e-06	3.82494e-05
440	ceRNA	RNF11	71.9188	64.4965	0.157148	1.07376e-05	118	0.07637	5.79466e-12	7.06949e-10
441	ceRNA	RNF111	12.8365	11.5165	0.156554	0.000673711	386	0.0764	2.46668e-30	9.81739e-28
442	ceRNA	RNF138	12.988	17.4291	-0.424324	4.26876e-05	106	-0.13695	5.15161e-08	5.56374e-06
443	ceRNA	RNF2	21.5804	16.8219	0.359377	8.45215e-08	125	0.10023	6.42983e-16	8.23018e-14
444	ceRNA	RNGTT	7.68403	9.66759	-0.331294	2.16798e-06	62	-0.0871	5.3784e-07	3.33461e-05
445	ceRNA	RORA	3.20661	2.57038	0.319065	0.000164607	462	0.1478	7.67826e-28	4.00805e-25
446	ceRNA	RORB	0.268579	0.194271	0.467279	2.05612e-10	19	0.64175	7.63704e-07	1.68015e-05
447	ceRNA	RPS6KA5	6.93771	5.23555	0.406119	1.08197e-07	192	0.13426	2.3315e-20	4.75626e-18
448	ceRNA	RREB1	16.0322	13.575	0.240013	2.28693e-06	179	0.08396	3.2126e-20	5.91119e-18
449	ceRNA	RSBN1	9.30927	7.64105	0.284896	1.09736e-08	544	0.08814	1.53662e-47	8.51286e-45
450	ceRNA	RSBN1L	17.1515	15.1343	0.180514	0.000185807	240	0.08801	6.01788e-25	1.51651e-22
451	ceRNA	RTF1	37.5036	33.6769	0.155266	1.91988e-06	88	0.07774	5.92529e-09	5.39201e-07
452	ceRNA	RUFY2	7.92363	6.80252	0.220092	5.70965e-05	260	0.04026	1.92745e-16	5.20412e-14
453	ceRNA	RUNX1	81.3295	45.1442	0.849239	1.51026e-28	131	0.17956	4.1751e-11	6.09564e-09
454	ceRNA	RUNX1T1	1.37867	0.841279	0.712625	5.73409e-13	363	0.13436	6.42651e-09	2.62844e-06
455	ceRNA	RUNX2	9.83583	6.842	0.523629	4.18268e-08	168	0.46797	7.25067e-12	2.44348e-09
456	ceRNA	RYBP	36.8329	28.9703	0.346417	1.27236e-13	445	0.11141	4.51368e-41	2.10338e-38
457	ceRNA	SAMD8	8.75937	9.15871	-0.0643158	2.86147e-05	280	0.01456	1.55748e-07	4.56341e-05
458	ceRNA	SAP30L	16.4467	14.0551	0.226709	7.52152e-06	78	0.05161	1.21709e-07	1.02235e-05
459	ceRNA	SBF2	16.4783	13.1757	0.32269	4.80698e-06	119	0.03186	4.89644e-12	5.87572e-10
460	ceRNA	SCAF8	27.9351	25.5762	0.127278	0.000447029	49	0.03619	1.77693e-06	8.70697e-05
461	ceRNA	SCN3A	0.345766	0.283231	0.287817	7.01199e-16	135	0.49731	1.86007e-12	4.61298e-10
462	ceRNA	SCYL3	18.1991	15.5775	0.224403	0.000517347	57	0.19784	1.29059e-14	7.48544e-13
463	ceRNA	SEC24B	25.0266	22.7715	0.13623	0.000496848	90	0.07523	6.07681e-11	5.46913e-09
464	ceRNA	SEMA6D	4.2701	1.4632	1.54514	1.34747e-18	392	0.261	6.66482e-20	3.39239e-17
465	ceRNA	SETBP1	7.61767	4.87495	0.643962	6.20865e-13	63	0.25951	5.1798e-12	3.31508e-10
466	ceRNA	SETD2	47.0835	43.2061	0.123986	0.000274934	79	0.02442	1.12808e-10	8.91181e-09
467	ceRNA	SETD7	35.2392	31.5488	0.159597	0.000893715	203	0.09938	5.83929e-23	1.19122e-20
468	ceRNA	SFMBT1	11.1761	9.64591	0.212426	0.000140277	90	0.08832	4.60365e-10	4.14328e-08
469	ceRNA	SH3D19	25.6823	17.7629	0.531911	2.97366e-16	69	0.14981	2.36996e-08	1.63527e-06
470	ceRNA	SH3PXD2A	20.3575	16.3569	0.315661	0.000158984	104	0.14861	3.69639e-08	3.91817e-06
471	ceRNA	SHOC2	42.392	34.0479	0.316225	2.79289e-09	202	0.10474	1.94962e-16	4.17219e-14
472	ceRNA	SIRT1	19.2638	15.9669	0.270809	1.98892e-07	329	0.09764	8.95555e-33	3.04489e-30
473	ceRNA	SLAIN2	22.041	19.9892	0.14097	0.000464351	181	0.09956	3.37913e-22	6.35277e-20
474	ceRNA	SLC12A2	50.8166	46.364	0.132295	0.000149138	108	0.16054	5.92117e-15	6.80935e-13
475	ceRNA	SLC22A5	20.0369	15.007	0.417019	3.22966e-11	56	0.27654	8.7287e-08	5.58637e-06
476	ceRNA	SLC25A24	44.7553	35.6023	0.330087	2.82745e-07	72	0.05558	3.13919e-09	2.35439e-07
477	ceRNA	SLC44A1	84.4127	64.3909	0.390603	6.38139e-11	135	0.17404	1.24722e-14	1.80847e-12
478	ceRNA	SLC4A7	19.3187	12.349	0.645605	1.19372e-11	195	0.15446	5.73401e-25	1.15827e-22
479	ceRNA	SLMAP	34.2788	27.9136	0.296348	2.013e-08	234	0.10899	6.13806e-23	1.50383e-20
480	ceRNA	SMAD1	29.1857	26.0193	0.165678	2.23649e-05	250	0.06624	1.24541e-25	3.16334e-23
481	ceRNA	SMAD5	22.4627	19.1066	0.233456	9.08408e-06	275	0.04172	2.93005e-22	8.29205e-20
482	ceRNA	SMEK2	59.7834	67.9905	-0.185588	0.000852933	220	-0.03927	1.244e-11	2.77412e-09
483	ceRNA	SNAP23	64.745	50.9083	0.346866	5.84539e-15	75	0.03984	6.21729e-09	4.72514e-07
484	ceRNA	SNRK	20.3998	15.7056	0.377281	2.33438e-15	395	0.12888	9.2115e-26	3.74908e-23
485	ceRNA	SNX13	15.802	13.7358	0.20216	6.69394e-05	366	0.09323	4.44681e-31	1.672e-28
486	ceRNA	SNX2	69.2408	61.5331	0.170259	0.000300684	54	0.21513	1.16858e-08	7.47894e-07
487	ceRNA	SNX9	45.2545	37.3043	0.278719	6.62448e-12	123	0.09976	5.83991e-10	7.35829e-08
488	ceRNA	SOCS5	16.2146	14.7608	0.135521	0.000163182	525	0.09017	7.34229e-31	4.08966e-28
489	ceRNA	SOCS6	17.8205	17.1208	0.0577939	0.000311769	248	0.10399	7.29034e-28	1.85175e-25
490	ceRNA	SORL1	27.3138	19.7872	0.465061	3.79949e-10	67	0.09184	1.05861e-12	7.09267e-11
491	ceRNA	SOS1	13.4794	16.8122	-0.318744	7.69615e-05	393	-0.04937	6.35425e-12	2.63702e-09
492	ceRNA	SP1	41.6756	35.9691	0.212446	2.53848e-07	287	0.11797	1.14051e-25	3.34169e-23
493	ceRNA	SPAST	9.7073	11.2641	-0.21459	0.000900691	235	-0.05654	1.05613e-11	2.5664e-09
494	ceRNA	SPIN1	61.02	51.4212	0.24692	9.83535e-08	154	0.04668	6.06987e-13	9.65109e-11
495	ceRNA	SPOP	46.9019	40.9512	0.195741	2.24313e-07	44	0.39212	2.3658e-08	1.49046e-06
496	ceRNA	SPOPL	31.469	22.3307	0.494905	9.77346e-13	432	0.12914	6.37268e-23	3.17997e-20
497	ceRNA	SREK1	35.9821	29.5145	0.285853	1.80555e-08	198	0.04439	4.97117e-19	9.99205e-17
498	ceRNA	SRPX	17.9075	13.0415	0.457455	1.67532e-07	51	0.48247	3.56921e-10	3.1409e-08
499	ceRNA	SRSF10	64.2979	72.212	-0.167467	9.11493e-06	268	-0.01775	2.38302e-09	6.64863e-07
500	ceRNA	SSFA2	88.6651	57.7174	0.61936	4.75937e-05	133	0.06992	3.94698e-14	5.40737e-12
501	ceRNA	STARD13	11.7174	6.81644	0.78156	1.55242e-18	88	0.14613	4.5115e-08	4.33104e-06
502	ceRNA	STK39	28.8847	24.2093	0.254743	9.21777e-05	65	0.2331	1.59991e-08	1.18394e-06
503	ceRNA	STX12	38.1664	34.1989	0.158352	8.35186e-06	89	0.14258	2.72211e-11	2.72211e-09
504	ceRNA	SYNCRIP	68.1989	89.1894	-0.387124	1.02518e-08	700	-0.09201	1.39026e-23	1.02184e-20
505	ceRNA	SYNE1	16.1009	13.439	0.260716	2.35464e-05	138	0.09053	3.47861e-07	4.80048e-05
506	ceRNA	SYPL1	151.716	128.113	0.243955	6.74756e-06	47	0.12344	6.0221e-09	3.01105e-07
507	ceRNA	SYT1	20.7973	8.7639	1.24675	1.37945e-08	115	0.28828	6.74481e-09	9.10549e-07
508	ceRNA	TAB3	14.3284	11.8655	0.272095	4.30165e-07	322	0.10091	2.40666e-26	8.20672e-24
509	ceRNA	TACC1	28.0959	21.5549	0.382345	8.10142e-05	147	0.00918	3.61384e-07	5.34849e-05
510	ceRNA	TAF4	10.3721	12.5019	-0.269444	5.3483e-06	203	-0.03396	6.70399e-13	1.38102e-10
511	ceRNA	TAF5	2.6838	3.99606	-0.574302	1.77283e-19	189	-0.17583	3.4606e-08	6.74817e-06
512	ceRNA	TAOK3	24.8606	21.196	0.230069	5.09469e-05	113	0.1067	1.85373e-14	2.16887e-12
513	ceRNA	TARDBP	72.2799	78.7574	-0.123822	1.06307e-05	196	-0.00206	2.87717e-08	5.66802e-06
514	ceRNA	TBC1D12	7.13967	5.92092	0.270037	3.91243e-07	125	0.08533	9.48571e-13	1.20468e-10
515	ceRNA	TBC1D19	5.42385	4.07881	0.411169	3.54015e-12	145	0.08783	2.91505e-14	4.31427e-12
516	ceRNA	TBC1D9	208.84	129.163	0.693204	1.94352e-18	243	0.21557	1.28043e-07	4.37908e-05
517	ceRNA	TCF12	40.3081	35.1222	0.198687	3.70553e-06	108	0.14982	3.68708e-12	4.01892e-10
518	ceRNA	TCF4	24.0278	16.0965	0.577963	1.88462e-10	900	0.20611	2.13149e-22	2.38087e-19
519	ceRNA	TEAD1	17.0147	13.5172	0.331986	1.40426e-07	310	0.10544	5.96856e-29	1.88606e-26
520	ceRNA	TET3	6.00411	9.20702	-0.616783	1.23139e-13	528	-0.06829	5.49608e-17	3.05582e-14
521	ceRNA	TGFBR3	16.8984	13.2302	0.353055	1.65575e-07	17	0.87542	3.20052e-07	1.2162e-05
522	ceRNA	TGOLN2	103.251	85.2559	0.276281	6.07872e-08	58	-0.01842	1.15277e-10	6.68604e-09
523	ceRNA	TJP1	27.0156	23.1865	0.22051	1.91988e-06	184	0.08231	1.73843e-14	3.30302e-12
524	ceRNA	TLK1	28.0186	25.0813	0.159769	0.0003581	76	0.06394	6.97961e-11	5.4441e-09
525	ceRNA	TMED7	75.5593	59.02	0.356407	1.18619e-09	54	0.21314	2.62413e-11	1.54824e-09
526	ceRNA	TMEM161B	10.287	8.68396	0.244403	6.88672e-06	191	0.15278	1.9167e-15	4.00591e-13
527	ceRNA	TMEM9B	99.0061	75.4911	0.391211	1.14401e-15	90	0.2552	1.07983e-08	1.19861e-06
528	ceRNA	TMF1	19.4905	16.596	0.231933	3.36331e-05	81	0.10597	9.57217e-12	7.75346e-10
529	ceRNA	TNFAIP6	18.3541	13.0156	0.495867	1.66855e-09	10	0.50982	6.58668e-06	6.58668e-05
530	ceRNA	TNRC6A	21.3967	18.079	0.243077	3.04921e-05	337	0.07313	2.35245e-33	7.99833e-31
531	ceRNA	TNRC6C	8.32638	7.10375	0.229107	1.2088e-06	65	0.11245	3.83674e-07	2.53225e-05
532	ceRNA	TOR1AIP1	51.7416	41.924	0.303547	2.84917e-07	36	0.13398	4.93316e-07	1.77594e-05
533	ceRNA	TP53INP1	43.83	32.7545	0.420225	4.614e-10	211	0.17497	2.04988e-09	5.0017e-07
534	ceRNA	TRAK2	24.9307	20.2533	0.299762	1.76783e-06	40	0.1513	2.4321e-07	1.02148e-05
535	ceRNA	TRIM23	9.21995	7.19747	0.357269	4.72411e-09	130	0.12327	9.55746e-14	1.29026e-11
536	ceRNA	TRPC3	0.170867	0.134313	0.347278	2.67623e-05	19	0.55796	2.49845e-07	7.7452e-06
537	ceRNA	TRPS1	112.25	89.579	0.325476	0.000122934	138	0.1015	3.84297e-13	5.41859e-11
538	ceRNA	TSG101	106.206	95.1783	0.158161	3.85037e-06	62	0.08409	3.74094e-07	2.31938e-05
539	ceRNA	TSHZ1	14.8366	11.9992	0.306219	5.34033e-08	61	0.27361	3.85419e-09	2.58231e-07
540	ceRNA	TSHZ2	2.72149	1.51458	0.845484	2.83012e-09	196	0.25422	2.85354e-14	6.96265e-12
541	ceRNA	TSHZ3	6.42213	4.27709	0.586423	6.50577e-11	377	0.17043	1.98691e-08	9.04044e-06
542	ceRNA	TSPAN18	14.5741	14.21	0.036503	0.00048623	17	0.43455	2.53482e-06	5.57661e-05
543	ceRNA	TWF1	77.4706	69.417	0.158359	0.000272627	203	0.11067	3.04738e-15	6.70424e-13
544	ceRNA	U2SURP	31.5107	39.5134	-0.326502	6.17315e-07	159	-0.03007	1.33677e-09	2.13883e-07
545	ceRNA	UBE2B	43.754	35.0083	0.321718	1.28446e-10	94	0.10124	2.64473e-07	2.69762e-05
546	ceRNA	UBE2D1	13.2211	15.3382	-0.214282	0.0003581	247	-0.10255	6.91484e-18	1.75637e-15
547	ceRNA	UBE2D3	228.556	214.741	0.0899501	0.000983272	236	0.06734	7.79269e-23	1.90921e-20
548	ceRNA	UBE2Q2	42.4233	35.3062	0.264935	1.363e-06	106	0.12405	2.8039e-12	3.08429e-10
549	ceRNA	UBE3A	48.8286	40.042	0.286214	8.21871e-08	113	0.13958	1.73144e-13	2.23356e-11
550	ceRNA	UBL3	34.5381	26.013	0.408954	8.44188e-12	210	0.20487	5.99046e-19	1.50361e-16
551	ceRNA	UBR1	10.9171	9.40764	0.21469	6.07085e-05	143	0.11975	7.07043e-13	1.10299e-10
552	ceRNA	USP33	42.1271	37.6369	0.1626	2.81634e-05	126	0.13984	2.90731e-17	3.83765e-15
553	ceRNA	USP47	40.0223	35.7183	0.16414	0.000192868	100	0.05306	5.94691e-08	6.18479e-06
554	ceRNA	USP53	12.7295	9.85619	0.369072	6.40823e-07	173	0.09942	6.87961e-21	1.22457e-18
555	ceRNA	USP6NL	11.0908	16.4944	-0.572617	7.92591e-11	230	-0.13232	1.22258e-09	2.92196e-07
556	ceRNA	UTRN	18.2301	13.6832	0.413921	7.80151e-08	92	0.12288	1.41226e-08	1.34165e-06
557	ceRNA	VAV3	156.024	94.3377	0.725862	3.47116e-17	31	0.42474	1.21714e-06	4.99028e-05
558	ceRNA	WASL	43.2635	36.8859	0.230079	2.1296e-06	221	0.04674	1.03624e-16	2.373e-14
559	ceRNA	WDFY3	20.9133	17.7671	0.235214	1.61738e-07	455	0.09833	6.56349e-28	3.13079e-25
560	ceRNA	WDR20	20.7588	17.9958	0.206062	1.77554e-08	116	0.22411	1.10965e-10	1.58681e-08
561	ceRNA	WDR43	24.4075	29.95	-0.295232	7.77588e-07	129	-0.06572	2.11654e-07	2.92082e-05
562	ceRNA	WWP1	119.943	90.621	0.404428	2.65485e-10	238	0.10085	8.77598e-08	2.36074e-05
563	ceRNA	XPO1	101.949	131.623	-0.368563	2.39588e-16	230	-0.07172	1.27108e-12	2.94892e-10
564	ceRNA	YIPF4	29.8456	34.4808	-0.208275	0.000738774	103	-0.04919	7.08836e-09	7.30101e-07
565	ceRNA	YIPF5	35.1895	31.448	0.162178	0.00011021	63	0.06465	3.92935e-09	2.55407e-07
566	ceRNA	YPEL2	15.9551	13.8248	0.206764	1.07895e-09	240	0.13549	1.50584e-22	3.6893e-20
567	ceRNA	ZBTB1	21.1112	18.5224	0.188735	3.71977e-05	71	0.08648	2.68304e-09	1.93179e-07
568	ceRNA	ZBTB4	41.0683	27.3218	0.587975	1.72539e-23	172	0.1028	7.22796e-13	1.36608e-10
569	ceRNA	ZBTB41	17.0776	14.063	0.280194	0.000597867	278	0.09861	3.63158e-31	1.04953e-28
570	ceRNA	ZBTB44	20.2605	16.4379	0.301645	3.69923e-08	144	0.08871	3.54219e-16	5.10075e-14
571	ceRNA	ZDHHC17	12.3633	10.5983	0.222241	8.02035e-06	362	0.13981	7.91098e-26	3.14066e-23
572	ceRNA	ZEB1	14.8401	9.25817	0.680704	8.47554e-15	566	0.07454	1.21234e-12	7.20129e-10
573	ceRNA	ZFAND6	105.93	94.0791	0.171165	5.70845e-06	60	0.01822	1.37829e-06	8.40759e-05
574	ceRNA	ZFHX4	2.08042	1.33569	0.639287	6.97519e-10	576	0.26027	7.17498e-22	5.60366e-19
575	ceRNA	ZFP161	10.8752	9.65623	0.171504	0.000142758	128	0.1022	8.53519e-15	1.17786e-12
576	ceRNA	ZFPM2	3.26405	2.14404	0.60633	1.17336e-10	584	0.31883	6.19469e-20	5.42036e-17
577	ceRNA	ZFR	51.7285	58.6925	-0.182217	0.000503589	197	-0.03095	7.77259e-08	1.57783e-05
578	ceRNA	ZFX	19.1392	16.2807	0.233367	1.62739e-05	451	0.10571	1.62027e-36	7.71251e-34
579	ceRNA	ZFYVE16	22.1525	17.1322	0.370758	7.29265e-12	137	0.12933	1.80949e-09	2.78661e-07
580	ceRNA	ZFYVE26	10.5467	8.53627	0.30511	0.000164607	185	0.05593	8.00752e-13	1.56147e-10
581	ceRNA	ZNF197	13.2167	11.0146	0.262954	1.2892e-08	59	0.09861	1.08752e-08	6.41634e-07
582	ceRNA	ZNF238	57.6238	25.8783	1.15492	7.78207e-10	95	0.43863	9.29319e-10	1.56126e-07
583	ceRNA	ZNF280D	20.6081	16.0251	0.362882	2.83395e-13	80	0.21253	2.21372e-14	1.9038e-12
584	ceRNA	ZNF281	22.0902	17.6917	0.320336	7.67302e-05	82	0.15844	1.5544e-10	1.38342e-08
585	ceRNA	ZNF326	16.4829	18.9825	-0.2037	0.000340726	243	-0.03731	8.37838e-17	2.0527e-14
586	ceRNA	ZNF367	3.86992	8.23959	-1.09027	1.15842e-26	305	-0.11216	1.73595e-14	5.50298e-12
587	ceRNA	ZNF608	7.89189	5.56827	0.503141	4.22898e-05	41	0.50249	6.01357e-09	3.78855e-07
588	ceRNA	ZNF697	4.1876	3.70577	0.176348	0.000309185	73	0.21445	2.47539e-10	1.95556e-08
589	ceRNA	ZNF800	15.6299	12.9122	0.275578	5.72796e-06	396	0.0698	2.31471e-27	9.51345e-25
590	ceRNA	ZNRF2	22.8342	19.5052	0.227338	0.000129236	29	0.2221	1.71646e-07	5.49267e-06
591	ceRNA	ZSWIM6	7.37757	6.07633	0.279944	3.07793e-06	223	0.09507	1.69419e-19	3.8797e-17

## Sheet: LuminalB
No.	Regulator		Average expression (normalized read counts)		Expression difference		Target set enrichment analysis by running-sum statistic
	Type	ID	LuminalB	Others	Log2 fold change	U-test p-val (two-tailed)	Number of Targets	Log2 fold change of targets (average)	pFET	Adjusted P-val
1	miRNA	hsa-miR-135b-5p	7.18495	42.123	-2.55156	9.80183e-08	691	0.16821	6.72236e-10	5.27033e-07
2	miRNA	hsa-miR-148a-5p	27.5627	41.8054	-0.600973	1.52471e-07	260	0.18867	4.01974e-08	1.1818e-05
3	miRNA	hsa-miR-181c-5p	37.2934	54.4995	-0.547322	2.39685e-05	754	0.11981	5.84822e-09	4.67273e-06
4	ceRNA	D4S234E	0.501328	2.21798	-2.14542	4.42365e-12	17	-0.93847	9.0984e-08	2.18362e-06
5	ceRNA	HDGFRP3	64.5105	44.3052	0.542059	5.25678e-06	37	0.32864	1.50002e-09	6.75009e-08
6	ceRNA	SELT	74.1932	60.5556	0.293027	1.78027e-07	40	0.34	2.72635e-12	1.14507e-10
7	ceRNA	ACBD5	27.6104	19.9118	0.471589	1.81998e-10	230	0.24925	7.77837e-41	1.87459e-38
8	ceRNA	ACSL4	10.2844	14.6805	-0.513446	4.16268e-06	124	-0.56016	4.7324e-19	8.61298e-17
9	ceRNA	ACTA2	322.056	540.879	-0.747994	1.3179e-09	9	-0.75518	8.75368e-06	8.75368e-05
10	ceRNA	ACVR2A	4.3177	5.58245	-0.370635	6.72124e-07	129	-0.36657	2.54474e-11	4.42785e-09
11	ceRNA	ADAMTS3	0.307413	0.879845	-1.51707	1.28104e-12	106	-0.69954	4.25365e-20	6.16779e-18
12	ceRNA	ADAMTS5	1.6393	2.76581	-0.754624	8.21507e-08	49	-0.52981	4.03842e-12	2.70574e-10
13	ceRNA	ADAMTS9	2.825	4.65766	-0.721355	1.76419e-07	19	-0.99325	9.89671e-09	1.88038e-07
14	ceRNA	ADNP	90.1149	70.7811	0.348401	2.87122e-07	147	0.21472	6.53706e-18	9.87097e-16
15	ceRNA	AFF2	0.154134	0.26295	-0.7706	1.07897e-06	60	-0.50189	7.54532e-12	5.43263e-10
16	ceRNA	AFF4	37.8714	30.9988	0.288893	0.000673292	527	0.17982	7.93344e-35	4.5776e-32
17	ceRNA	AFTPH	51.8722	44.8168	0.210922	6.45987e-05	52	0.25177	6.11739e-11	3.30339e-09
18	ceRNA	AGGF1	24.1035	18.407	0.388987	1.21716e-11	49	0.27235	5.85634e-15	2.98673e-13
19	ceRNA	AKAP1	55.8557	41.8799	0.415447	1.43009e-07	28	0.26735	1.29308e-07	3.62063e-06
20	ceRNA	AKT3	14.1002	27.4825	-0.962799	3.29861e-08	99	-0.5421	4.61283e-08	6.13506e-06
21	ceRNA	ALDH1A3	8.26538	17.8358	-1.10963	2.4989e-15	16	-0.60432	1.50972e-09	2.41555e-08
22	ceRNA	ANK2	4.67473	5.66111	-0.276203	0.000823776	78	-0.67248	2.76403e-11	3.59324e-09
23	ceRNA	ANKHD1	66.8224	52.8321	0.338915	2.66071e-07	58	0.20954	8.60757e-11	5.33669e-09
24	ceRNA	ANKIB1	31.7926	26.6812	0.252867	3.84569e-05	466	0.16541	6.68879e-49	3.15042e-46
25	ceRNA	ANKRA2	16.7216	12.7673	0.389256	6.84587e-08	328	0.25722	4.74196e-21	1.8304e-18
26	ceRNA	ANKRD13C	10.5764	9.37241	0.174362	0.000504191	362	0.16134	6.81952e-36	2.49594e-33
27	ceRNA	ANKRD40	39.1201	29.1842	0.422724	2.06765e-07	21	0.31544	2.10153e-06	4.62336e-05
28	ceRNA	ANKRD52	20.1421	14.8017	0.444454	3.0703e-07	180	0.17912	2.69695e-18	5.09724e-16
29	ceRNA	ANKS1B	5.2117	3.32141	0.649956	4.43455e-08	20	0.31081	2.28365e-06	5.02402e-05
30	ceRNA	AP3M1	35.118	25.9479	0.436595	7.55175e-09	63	0.25929	3.16893e-12	2.12318e-10
31	ceRNA	AP4E1	8.06701	6.19252	0.381508	1.54078e-08	49	0.28439	4.20762e-11	2.52457e-09
32	ceRNA	APC	9.60039	7.99046	0.264814	5.74298e-05	179	0.16651	1.20604e-13	2.27941e-11
33	ceRNA	APCDD1	8.68925	14.8024	-0.768533	8.20242e-10	14	-0.53119	8.22542e-07	1.23381e-05
34	ceRNA	APPBP2	29.0228	19.4981	0.573857	9.64138e-09	51	0.20645	1.84725e-07	1.05293e-05
35	ceRNA	ARF6	104.879	87.8021	0.256397	3.90229e-05	101	0.21122	2.49477e-17	2.59456e-15
36	ceRNA	ARFGEF1	86.2744	59.3467	0.539763	2.94802e-12	144	0.26871	1.89978e-26	2.88767e-24
37	ceRNA	ARFGEF2	42.2868	30.3034	0.480731	1.34747e-05	71	0.19368	6.15915e-11	4.373e-09
38	ceRNA	ARFIP1	39.8363	33.6038	0.245459	0.000139824	235	0.22399	9.88223e-34	2.44091e-31
39	ceRNA	ARHGAP20	0.555329	0.769099	-0.469827	0.000296602	94	-0.72866	5.04555e-12	8.32515e-10
40	ceRNA	ARHGAP28	1.47068	2.63554	-0.841617	1.86044e-10	46	-0.55751	1.26581e-15	6.96197e-14
41	ceRNA	ARHGAP35	43.3803	36.6644	0.242659	0.000910222	34	0.27283	5.90986e-07	2.06845e-05
42	ceRNA	ARID2	16.3287	12.5167	0.38356	8.80904e-08	337	0.22074	2.77092e-36	1.02247e-33
43	ceRNA	ARID4A	9.53353	7.64186	0.319087	1.01619e-05	595	0.17268	1.53249e-36	9.89986e-34
44	ceRNA	ARID4B	28.2892	23.9382	0.240939	0.000291815	533	0.17893	1.43018e-48	7.9804e-46
45	ceRNA	ARID5B	15.1415	21.3762	-0.497499	1.82913e-06	319	-0.13563	5.83149e-09	1.96521e-06
46	ceRNA	ARL4A	8.37222	11.6539	-0.477135	5.03957e-07	13	-1.18658	4.69658e-07	6.10555e-06
47	ceRNA	ARL4C	16.3105	25.9967	-0.672527	5.28427e-08	18	-0.46134	1.11698e-07	2.12227e-06
48	ceRNA	ARL8B	98.1629	81.236	0.27306	1.68174e-05	170	0.2493	5.91341e-30	1.03485e-27
49	ceRNA	ARMC1	42.3813	32.2819	0.392702	4.15229e-07	85	0.2591	1.06908e-16	1.00494e-14
50	ceRNA	ARMC8	19.8998	17.9581	0.148123	0.000296602	190	0.18173	1.03701e-25	2.0118e-23
51	ceRNA	ARPP19	81.1863	66.18	0.29484	3.93688e-08	179	0.23531	5.69968e-26	1.08294e-23
52	ceRNA	ARSJ	2.00522	2.95608	-0.559928	3.29712e-05	39	-0.44964	8.93764e-15	3.66443e-13
53	ceRNA	ASAP2	19.5686	14.659	0.41675	2.66945e-08	73	0.23125	1.96949e-11	1.49681e-09
54	ceRNA	ATAD2	51.5511	28.1707	0.87181	8.65356e-14	99	0.25439	2.19012e-18	2.19012e-16
55	ceRNA	ATP2A2	99.8037	83.9884	0.248904	6.70261e-06	350	0.16395	1.41804e-23	5.07658e-21
56	ceRNA	ATP6V1A	52.3583	44.7154	0.227648	3.26085e-05	65	0.20786	2.76921e-09	1.82768e-07
57	ceRNA	ATPBD4	6.93492	4.98963	0.474948	2.26305e-07	22	0.28348	1.51235e-07	3.4784e-06
58	ceRNA	ATXN2	28.9518	23.9283	0.274938	1.02019e-05	27	0.24877	1.94459e-09	5.44484e-08
59	ceRNA	ATXN7L3B	101.714	84.0562	0.275097	5.28866e-05	27	0.29887	1.13233e-06	3.62347e-05
60	ceRNA	AZIN1	165.766	116.83	0.504739	1.9863e-08	161	0.24882	3.47968e-26	5.88066e-24
61	ceRNA	B3GNT5	2.11482	8.22226	-1.959	2.08134e-15	54	-0.8027	7.95842e-08	7.08299e-06
62	ceRNA	BACH2	0.763385	1.19469	-0.646155	1.15586e-09	317	-0.42417	2.88063e-12	1.44031e-09
63	ceRNA	BAI3	0.0614918	0.0801264	-0.381884	0.000338722	39	-0.60338	1.40615e-06	8.99934e-05
64	ceRNA	BAZ2A	40.7545	31.6494	0.364778	3.44944e-09	304	0.22199	1.62615e-38	5.35004e-36
65	ceRNA	BCL11B	1.16608	1.60771	-0.46334	0.000156917	146	-0.8137	2.86238e-25	7.15595e-23
66	ceRNA	BCL2L2	27.5102	23.2643	0.241847	0.00041578	55	0.20468	1.78883e-08	1.03752e-06
67	ceRNA	BCOR	26.8368	22.569	0.249873	0.000846575	92	0.26965	2.44542e-15	2.42097e-13
68	ceRNA	BDP1	16.7767	12.4765	0.427248	3.42743e-08	64	0.17715	1.55552e-09	9.95533e-08
69	ceRNA	BECN1	94.4445	76.6573	0.301043	8.19635e-06	87	0.27821	1.34395e-14	1.30363e-12
70	ceRNA	BEND7	4.38891	5.82369	-0.408071	8.50554e-05	13	-1.12933	7.59703e-08	9.87614e-07
71	ceRNA	BHLHE22	0.602194	1.20876	-1.00523	1.83505e-05	50	-0.57338	7.49689e-10	4.94794e-08
72	ceRNA	BHLHE41	14.2015	25.1458	-0.824268	5.18667e-10	138	-0.68356	1.03358e-30	1.97414e-28
73	ceRNA	BMP2	0.533313	1.165	-1.12728	3.06942e-08	15	-1.03628	1.63875e-06	2.78588e-05
74	ceRNA	BMP6	1.46129	2.69149	-0.881162	7.42802e-06	13	-0.59183	3.39456e-06	5.43129e-05
75	ceRNA	BOD1L1	14.0589	11.2655	0.319578	6.80975e-06	350	0.17461	1.04558e-35	3.74318e-33
76	ceRNA	BPTF	43.1279	30.8278	0.484392	2.5137e-10	187	0.22582	2.84238e-19	5.77004e-17
77	ceRNA	BRPF3	35.2344	29.6823	0.24738	0.000305407	49	0.21106	2.91509e-11	1.4867e-09
78	ceRNA	BRWD1	33.1001	25.724	0.363721	2.32508e-07	436	0.21854	1.65036e-56	7.52562e-54
79	ceRNA	BRWD3	6.44002	4.96971	0.373904	0.000373007	336	0.2081	5.77522e-40	2.09063e-37
80	ceRNA	BTBD10	29.056	24.3298	0.256117	4.3204e-07	192	0.20752	2.3488e-24	4.62714e-22
81	ceRNA	C11orf30	21.3758	14.6229	0.547747	0.000538493	384	0.15929	5.76457e-41	2.27124e-38
82	ceRNA	C12orf51	12.4235	9.09419	0.450051	3.59548e-08	195	0.24052	2.4314e-31	4.81417e-29
83	ceRNA	C16orf52	13.8177	11.7575	0.232933	9.57685e-05	506	0.21122	2.61072e-44	1.39935e-41
84	ceRNA	C16orf70	22.2456	18.8458	0.239274	3.23698e-05	68	0.22068	1.63861e-09	1.1798e-07
85	ceRNA	C18orf25	14.5536	11.3132	0.363376	4.59537e-07	111	0.22271	3.84099e-17	4.45554e-15
86	ceRNA	C20orf112	24.0075	19.8298	0.275813	8.1553e-05	30	0.29167	3.66271e-08	1.13544e-06
87	ceRNA	C5orf15	82.9264	69.8558	0.247452	4.52921e-05	61	0.20952	3.06283e-09	2.05209e-07
88	ceRNA	C5orf24	34.3739	26.6561	0.366848	8.78536e-07	511	0.1777	3.04825e-39	1.64301e-36
89	ceRNA	C5orf30	33.2031	26.7161	0.313608	1.20017e-06	97	0.36797	1.52797e-08	2.21555e-06
90	ceRNA	CALD1	93.9212	142.955	-0.606034	5.92888e-10	95	-0.53761	2.61976e-20	3.11752e-18
91	ceRNA	CAND1	84.1153	58.9766	0.512225	8.80904e-08	361	0.19279	4.56979e-37	1.68625e-34
92	ceRNA	CANX	435.517	338.002	0.365697	8.85965e-09	46	0.33162	3.33583e-10	1.86806e-08
93	ceRNA	CAPRIN2	7.83162	6.44001	0.282249	0.000332216	79	0.21877	3.91746e-11	3.44736e-09
94	ceRNA	CASC4	79.0313	62.822	0.331153	4.88692e-07	105	0.23949	4.29724e-13	5.11371e-11
95	ceRNA	CAV1	38.4683	58.2475	-0.598528	2.80134e-08	30	-0.44628	1.38517e-09	4.57105e-08
96	ceRNA	CBX3	291.271	239.128	0.284577	1.71086e-09	32	0.28651	1.68371e-07	6.22973e-06
97	ceRNA	CCAR1	43.1796	37.9138	0.187625	9.24989e-07	67	0.21523	9.97272e-14	6.9809e-12
98	ceRNA	CCDC117	64.8923	33.5861	0.950185	7.97859e-09	34	0.29684	7.48536e-11	2.69473e-09
99	ceRNA	CCDC47	127.38	95.7324	0.412058	3.71776e-08	36	0.30349	6.9101e-11	2.62584e-09
100	ceRNA	CCDC71L	7.43843	12.587	-0.758867	1.51788e-11	55	-0.60865	7.98085e-11	6.22506e-09
101	ceRNA	CCND2	7.64547	10.0169	-0.389754	5.40605e-06	145	-0.55362	3.29033e-28	6.08711e-26
102	ceRNA	CCNE2	18.4562	10.2636	0.846566	3.10183e-15	75	0.33358	1.06265e-15	9.35136e-14
103	ceRNA	CCP110	17.0844	13.1358	0.379179	6.14204e-06	89	0.18981	1.63709e-14	1.47338e-12
104	ceRNA	CD2AP	35.5837	31.1013	0.194241	0.000831321	132	0.25261	8.81745e-21	1.27853e-18
105	ceRNA	CDC23	31.9961	25.1187	0.349136	3.84814e-11	96	0.20054	5.96415e-16	5.78523e-14
106	ceRNA	CDC27	29.0042	24.2864	0.256112	4.2277e-05	215	0.17935	8.80884e-28	1.8939e-25
107	ceRNA	CDK12	30.0174	22.6705	0.40498	0.000123647	211	0.22607	1.91453e-24	4.40342e-22
108	ceRNA	CDK13	30.0696	26.9595	0.157511	0.000615615	157	0.20361	4.10629e-22	6.98069e-20
109	ceRNA	CDK17	26.7284	20.3421	0.393909	7.42554e-07	777	0.18848	6.51934e-39	5.60012e-36
110	ceRNA	CDK2	44.5419	32.7517	0.443591	7.27024e-12	33	0.2953	1.65358e-09	5.62217e-08
111	ceRNA	CDK6	3.2345	6.23056	-0.945822	3.55353e-06	48	-0.52699	4.7983e-11	3.11889e-09
112	ceRNA	CELF1	76.6575	62.747	0.28888	1.12597e-06	500	0.19077	3.31564e-64	1.69429e-61
113	ceRNA	CELF2	4.95865	7.24427	-0.546892	0.000136996	468	-0.32229	2.68034e-13	1.65377e-10
114	ceRNA	CENPO	11.7896	9.30435	0.341538	2.73462e-08	96	0.20443	9.52224e-10	1.01888e-07
115	ceRNA	CEP120	11.9408	9.26892	0.365423	1.26822e-06	185	0.24526	1.12332e-24	2.21294e-22
116	ceRNA	CEP135	5.32474	4.13411	0.365133	9.2711e-08	38	0.20778	6.46686e-08	2.52207e-06
117	ceRNA	CEP41	9.44775	8.20037	0.204281	0.000671202	26	0.23118	1.18755e-09	3.08763e-08
118	ceRNA	CERS6	63.9592	40.0989	0.67359	1.55153e-10	111	0.22466	1.41725e-12	1.7007e-10
119	ceRNA	CGGBP1	53.6626	43.7036	0.296164	1.57954e-06	165	0.23256	8.09754e-20	1.48185e-17
120	ceRNA	CHD1	28.9549	22.2359	0.380913	6.71854e-08	86	0.26375	6.29384e-16	5.7274e-14
121	ceRNA	CHD6	26.1549	19.6202	0.41474	1.1738e-07	269	0.22968	2.36104e-31	6.89423e-29
122	ceRNA	CHUK	17.6044	14.725	0.257661	2.49734e-05	78	0.17895	1.91233e-12	1.49162e-10
123	ceRNA	CIT	7.38721	4.63825	0.671451	5.31514e-11	106	0.26612	3.20549e-16	3.55809e-14
124	ceRNA	CLASP2	19.2941	16.0431	0.266214	9.28133e-05	189	0.19828	9.09341e-21	1.85505e-18
125	ceRNA	CLINT1	54.7622	46.7382	0.228577	2.48795e-05	141	0.21525	3.75225e-18	5.92855e-16
126	ceRNA	CLIP4	4.18218	7.14511	-0.772702	8.29184e-08	86	-0.46372	3.50329e-19	3.2931e-17
127	ceRNA	CLOCK	9.61162	7.45748	0.36609	4.35221e-05	221	0.13522	7.1442e-20	1.62173e-17
128	ceRNA	CLTC	279.947	178.23	0.651417	8.85965e-11	68	0.26706	1.0545e-11	7.80333e-10
129	ceRNA	CNKSR2	0.105871	0.273735	-1.37048	1.15499e-07	178	-0.47739	6.43947e-08	1.73866e-05
130	ceRNA	CNN1	10.1435	25.2054	-1.31317	2.2497e-12	13	-1.14244	1.76344e-06	2.99784e-05
131	ceRNA	CNN3	156.494	213.377	-0.447299	3.55675e-09	21	-0.32512	1.25238e-06	2.63e-05
132	ceRNA	CNOT6	24.771	19.4661	0.347687	2.03523e-08	487	0.18341	5.16219e-48	2.59142e-45
133	ceRNA	CNTN4	2.60809	4.13298	-0.66419	8.53531e-05	21	-0.69664	8.43072e-07	2.2763e-05
134	ceRNA	COG2	40.9736	33.6076	0.285906	3.73499e-05	24	0.38556	2.77077e-06	7.75816e-05
135	ceRNA	COL14A1	19.7506	38.2099	-0.95205	1.96365e-06	33	-0.6527	1.53364e-06	7.97495e-05
136	ceRNA	CPD	54.9833	43.6618	0.332623	0.000248598	141	0.24216	4.97453e-19	7.56128e-17
137	ceRNA	CPEB4	21.393	15.2292	0.490301	3.16763e-07	597	0.25581	5.17089e-31	3.65065e-28
138	ceRNA	CPNE8	2.26288	3.63076	-0.682116	1.74987e-08	102	-0.54185	1.34482e-17	1.89619e-15
139	ceRNA	CPSF6	30.8844	24.734	0.320385	8.80904e-08	467	0.21534	2.59878e-54	1.289e-51
140	ceRNA	CREB5	0.835968	1.47827	-0.822391	1.51778e-07	192	-0.41476	9.88914e-35	2.16572e-32
141	ceRNA	CRISPLD1	28.7678	41.0367	-0.512459	2.30909e-06	35	-0.96275	1.1085e-10	4.87741e-09
142	ceRNA	CSNK1A1	243.151	199.396	0.286212	1.58846e-05	81	0.26316	7.42515e-11	7.3509e-09
143	ceRNA	CSNK1G1	11.9928	10.0993	0.247912	7.79099e-05	180	0.20894	3.57319e-21	6.57467e-19
144	ceRNA	CSNK1G3	20.5567	17.3855	0.241724	3.56131e-05	253	0.198	8.39427e-19	2.25806e-16
145	ceRNA	CSRNP2	28.6527	24.5879	0.220723	0.000528479	57	0.26663	7.88827e-11	4.73296e-09
146	ceRNA	CTCF	51.4566	44.6889	0.203437	1.2736e-06	153	0.20912	6.74647e-24	1.07269e-21
147	ceRNA	CTDSPL2	15.9954	13.3902	0.256483	0.000128832	513	0.16888	3.92575e-44	2.0885e-41
148	ceRNA	CTR9	42.7962	34.3106	0.318828	1.0034e-06	33	0.17722	3.29455e-07	1.0872e-05
149	ceRNA	CUL3	30.8448	26.5898	0.214156	3.90229e-05	339	0.17829	4.60625e-38	1.59837e-35
150	ceRNA	CXCL12	71.0885	98.0515	-0.463924	0.000327961	53	-0.52409	6.89635e-08	6.34464e-06
151	ceRNA	DAZAP2	343.678	291.339	0.238359	5.15252e-06	154	0.24537	3.07771e-11	5.87843e-09
152	ceRNA	DCAF7	73.6097	56.6883	0.376845	7.3438e-08	46	0.26995	4.726e-13	2.26848e-11
153	ceRNA	DCAF8	70.3322	59.9566	0.230266	0.000744999	94	0.19086	1.74756e-12	1.73009e-10
154	ceRNA	DCLK2	1.77054	3.25885	-0.880173	1.62152e-10	15	-0.49796	8.43985e-07	1.26598e-05
155	ceRNA	DDI2	10.4635	7.68794	0.44469	0.000445854	71	0.16412	2.7852e-09	2.0889e-07
156	ceRNA	DDX46	36.2322	28.2447	0.359292	6.56269e-08	98	0.25875	8.57909e-17	9.00804e-15
157	ceRNA	DDX5	413.496	321.399	0.363507	1.21079e-08	147	0.24189	5.75079e-26	8.7412e-24
158	ceRNA	DHX15	109.071	89.0906	0.291922	1.77638e-06	34	0.18755	3.8228e-08	1.33798e-06
159	ceRNA	DHX29	31.0842	23.5515	0.400361	9.21037e-07	44	0.19259	6.73514e-09	3.09816e-07
160	ceRNA	DHX40	83.4984	58.526	0.51267	9.86412e-07	85	0.35642	1.83198e-12	1.96022e-10
161	ceRNA	DKK1	2.15101	8.35287	-1.95726	1.21782e-07	27	-0.69786	2.62439e-07	1.02351e-05
162	ceRNA	DKK3	31.6731	44.6021	-0.493856	0.000207259	43	-0.57464	4.94119e-09	2.9153e-07
163	ceRNA	DLL1	2.36186	3.25914	-0.464572	9.1107e-06	26	-0.66833	3.02444e-08	1.17953e-06
164	ceRNA	DLX5	0.762318	4.30219	-2.49661	2.74781e-08	37	-0.59915	5.4472e-08	3.10491e-06
165	ceRNA	DMD	1.86704	6.03243	-1.69199	4.50088e-18	141	-0.67979	5.11615e-13	1.25346e-10
166	ceRNA	DMXL1	16.088	12.4971	0.364391	2.67279e-07	133	0.23397	3.62143e-20	5.17864e-18
167	ceRNA	DMXL2	15.6077	11.763	0.408007	1.16e-06	86	0.21119	2.09162e-17	1.86154e-15
168	ceRNA	DNAJB14	13.7978	11.3368	0.283433	0.000246972	40	0.27421	5.22052e-10	2.45364e-08
169	ceRNA	DNAJC13	20.6659	17.8022	0.215199	0.000658908	71	0.18493	1.67755e-11	1.19106e-09
170	ceRNA	DNAL1	7.24665	5.73292	0.338043	3.94935e-06	27	0.3101	4.76343e-07	1.28613e-05
171	ceRNA	DOK5	1.38846	3.36393	-1.27666	9.14152e-12	11	-0.52311	4.4466e-06	4.89126e-05
172	ceRNA	DPP8	12.8092	10.6734	0.263161	0.000589435	136	0.1613	5.32455e-14	7.24139e-12
173	ceRNA	DPY19L3	15.5893	12.7258	0.292798	0.000363551	69	0.25712	5.15476e-12	4.17536e-10
174	ceRNA	DPYSL2	29.2454	36.4896	-0.319274	0.00064285	67	-0.46926	9.63091e-20	7.60842e-18
175	ceRNA	DUSP7	9.79721	12.3529	-0.334403	6.51923e-06	30	-0.48299	5.02922e-08	1.9111e-06
176	ceRNA	DYNC1I1	0.758291	1.47628	-0.961139	8.09923e-09	19	-0.96456	9.0823e-09	1.90728e-07
177	ceRNA	E2F7	3.13445	1.93875	0.69308	1.08172e-13	48	0.28016	4.70634e-07	2.40023e-05
178	ceRNA	E2F8	6.5119	3.10641	1.06783	7.61625e-13	19	0.30673	2.6884e-07	5.37679e-06
179	ceRNA	EDC3	22.0133	19.4884	0.175759	0.000490136	27	0.25374	1.64961e-07	4.45394e-06
180	ceRNA	EFHA2	0.463838	0.604991	-0.383294	0.000763442	51	-0.39605	1.4708e-09	8.82481e-08
181	ceRNA	EFNA5	5.24683	8.23728	-0.650723	4.74713e-05	41	-0.79025	1.85737e-10	1.07727e-08
182	ceRNA	EFR3A	55.1132	44.7143	0.301661	0.000467497	73	0.22297	7.42394e-13	5.49372e-11
183	ceRNA	EGR1	70.3863	121.56	-0.788301	3.9741e-05	43	-0.72334	1.32114e-10	7.79473e-09
184	ceRNA	EIF4E	16.7323	13.6562	0.293076	4.40473e-06	59	0.28352	9.05444e-17	5.34212e-15
185	ceRNA	ELAVL1	31.9552	29.5294	0.113898	0.00023897	78	0.16261	4.44945e-10	3.47057e-08
186	ceRNA	EPB41L2	26.2446	36.5448	-0.477649	1.07439e-06	44	-0.47008	2.27357e-09	1.47782e-07
187	ceRNA	EPHA4	2.53683	3.63432	-0.518661	6.63444e-07	63	-0.58145	9.25739e-20	6.85047e-18
188	ceRNA	EPHB1	0.453037	2.13344	-2.23548	6.61093e-13	29	-0.66296	3.9058e-08	1.44515e-06
189	ceRNA	EPT1	21.3974	16.7478	0.353468	2.40668e-06	41	0.21	2.03353e-09	8.33747e-08
190	ceRNA	ERBB2IP	37.7801	31.3098	0.271012	1.59962e-06	483	0.18032	2.51749e-39	1.25623e-36
191	ceRNA	ESCO1	13.2723	11.5686	0.198205	0.000144166	64	0.19112	1.55552e-09	9.95533e-08
192	ceRNA	ETS2	16.8208	26.6005	-0.661209	4.36768e-13	10	-0.44535	3.99343e-06	3.99343e-05
193	ceRNA	F3	11.3444	18.6404	-0.716461	1.21552e-06	11	-0.62098	6.21606e-06	8.70248e-05
194	ceRNA	FAF2	47.1092	36.5182	0.36739	2.62494e-11	31	0.35484	9.35434e-09	3.18048e-07
195	ceRNA	FAM120A	147.463	120.363	0.292959	9.44502e-08	249	0.20962	9.87534e-31	2.59721e-28
196	ceRNA	FAM122B	30.8438	21.3563	0.530315	4.99483e-11	53	0.25119	1.82473e-13	1.0036e-11
197	ceRNA	FAM133B	4.74922	4.20117	0.1769	0.00084402	295	0.18787	1.05729e-45	3.18244e-43
198	ceRNA	FAM13B	15.7744	13.1255	0.26521	0.000319578	308	0.17617	1.35645e-30	4.24568e-28
199	ceRNA	FAM13C	1.35155	2.01315	-0.574841	0.000623271	81	-0.40815	1.0042e-15	9.33907e-14
200	ceRNA	FAM171A1	4.22189	14.2493	-1.75493	1.70606e-16	100	-0.79846	3.74033e-09	7.44326e-07
201	ceRNA	FAM178A	14.8862	11.667	0.351546	3.23903e-07	186	0.23193	4.66186e-25	9.32373e-23
202	ceRNA	FAM179B	9.73826	7.88483	0.304584	0.000606144	597	0.20213	2.33035e-33	1.51939e-30
203	ceRNA	FAM49A	3.51266	5.98406	-0.768561	2.82039e-07	35	-0.51977	3.53936e-08	1.38035e-06
204	ceRNA	FAM91A1	40.8648	28.6254	0.513563	3.80773e-06	190	0.21373	6.77123e-26	1.3407e-23
205	ceRNA	FAR1	37.9001	25.4067	0.576992	2.18326e-09	107	0.26712	3.68179e-23	4.41814e-21
206	ceRNA	FAT1	30.5374	66.7987	-1.12924	2.87997e-15	19	-0.7262	7.18871e-08	1.50963e-06
207	ceRNA	FAT2	0.41355	2.71744	-2.71611	8.47212e-17	16	-1.40924	1.331e-10	2.3958e-09
208	ceRNA	FBXL17	12.5673	10.3425	0.281093	9.31365e-05	214	0.20726	4.89827e-19	1.1217e-16
209	ceRNA	FBXO21	31.7144	26.4478	0.26199	1.76681e-05	91	0.23055	4.0975e-16	3.7697e-14
210	ceRNA	FBXO38	22.4015	17.5905	0.3488	2.44672e-06	57	0.22794	2.94117e-11	1.91176e-09
211	ceRNA	FBXO45	14.4629	11.4506	0.336931	5.61869e-08	24	0.21462	1.44596e-06	3.4703e-05
212	ceRNA	FBXW11	31.1114	24.5079	0.344197	9.28957e-07	296	0.19302	3.45954e-28	1.06208e-25
213	ceRNA	FGF7	2.93129	4.73194	-0.690893	1.82947e-07	50	-0.50334	1.76936e-10	1.29163e-08
214	ceRNA	FIBIN	10.2178	15.1532	-0.568536	4.79892e-05	54	-0.58589	8.93675e-17	5.98762e-15
215	ceRNA	FMR1	29.9836	25.009	0.261726	4.41585e-05	611	0.19883	1.01705e-65	6.67186e-63
216	ceRNA	FNDC3B	22.4081	29.57	-0.400116	0.000471953	608	-0.14961	1.28966e-14	8.21512e-12
217	ceRNA	FNIP1	16.5092	12.5357	0.397223	1.0034e-06	151	0.2234	1.58183e-16	2.57838e-14
218	ceRNA	FOXF2	1.7393	2.65732	-0.611465	3.01801e-06	52	-0.48989	2.45903e-13	1.64755e-11
219	ceRNA	FOXQ1	0.540126	1.68088	-1.63785	1.91746e-10	24	-0.7982	1.00608e-11	2.6158e-10
220	ceRNA	FRS2	37.5617	19.6471	0.934949	2.18326e-09	641	0.24667	5.61317e-41	4.23794e-38
221	ceRNA	FRYL	30.2181	24.3538	0.311268	2.09414e-05	279	0.19523	1.36054e-26	3.98639e-24
222	ceRNA	FSCN1	29.7749	67.9371	-1.1901	8.06593e-14	18	-0.50074	2.55796e-06	5.62751e-05
223	ceRNA	FSTL1	133.945	188.468	-0.492675	5.94967e-06	112	-0.41607	2.84738e-14	3.78702e-12
224	ceRNA	FUBP1	69.7518	61.8011	0.174597	0.000427836	162	0.21721	1.09146e-23	1.77908e-21
225	ceRNA	FUBP3	39.9051	33.3354	0.25952	3.64132e-06	434	0.22399	4.16432e-61	1.89893e-58
226	ceRNA	G2E3	10.6914	7.83958	0.447605	7.10719e-08	75	0.20076	9.36353e-14	7.11629e-12
227	ceRNA	G3BP2	86.728	72.8654	0.251263	2.31746e-05	383	0.16209	6.87854e-33	2.71014e-30
228	ceRNA	GABBR2	0.206763	1.25915	-2.6064	1.49233e-06	23	-0.72883	8.91031e-07	3.02951e-05
229	ceRNA	GABPB1	19.2816	17.0272	0.179386	1.92748e-05	341	0.18571	1.66319e-43	5.83779e-41
230	ceRNA	GALNTL2	2.85968	4.53092	-0.663949	4.93011e-06	21	-0.45998	1.60054e-08	3.68125e-07
231	ceRNA	GAS1	11.2962	18.8791	-0.740957	2.66879e-10	89	-0.67981	1.44712e-15	1.89573e-13
232	ceRNA	GEM	17.0112	25.9692	-0.61032	4.93932e-05	14	-0.52238	9.36609e-07	1.40491e-05
233	ceRNA	GFPT2	8.93549	12.4894	-0.483091	7.65539e-05	28	-0.53147	9.90753e-10	3.56671e-08
234	ceRNA	GIGYF2	29.5379	25.2221	0.227874	0.000421091	84	0.24367	1.09752e-14	1.07557e-12
235	ceRNA	GLI2	0.76747	1.35171	-0.816602	1.32314e-08	27	-0.80615	6.67141e-10	2.20156e-08
236	ceRNA	GLIS3	2.29413	3.59223	-0.646933	2.93267e-06	51	-0.54954	7.46038e-11	5.52068e-09
237	ceRNA	GLUD2	22.5237	18.0009	0.323373	0.000131054	30	0.25386	2.13409e-07	7.25591e-06
238	ceRNA	GMFB	40.4989	33.517	0.272988	5.4819e-05	416	0.16743	4.15969e-38	1.80946e-35
239	ceRNA	GNA13	43.6311	31.9281	0.450531	1.84639e-08	116	0.22465	2.63053e-18	3.07771e-16
240	ceRNA	GNAI1	6.72966	7.20122	-0.0977077	0.000243739	74	-0.49998	4.92724e-22	4.53306e-20
241	ceRNA	GNPDA2	16.9603	14.0597	0.270597	0.000105535	190	0.2167	2.58835e-26	4.96963e-24
242	ceRNA	GNS	119.099	94.4508	0.334524	4.04368e-07	89	0.20987	1.45971e-09	1.43052e-07
243	ceRNA	GOLGA1	16.663	13.6645	0.28622	7.55272e-08	200	0.26367	1.48363e-20	3.60523e-18
244	ceRNA	GOLGA4	56.3746	49.4062	0.190353	0.000775175	111	0.21179	9.37797e-19	1.04095e-16
245	ceRNA	GPBP1	81.9001	68.7971	0.251518	2.35677e-07	70	0.25657	1.16756e-16	8.28964e-15
246	ceRNA	GPD2	37.7176	29.858	0.33712	0.000533454	37	0.21711	3.59088e-07	1.36453e-05
247	ceRNA	GPM6B	4.4283	12.0981	-1.44995	6.44539e-14	80	-0.6435	9.57556e-15	1.08204e-12
248	ceRNA	GPR124	11.4688	14.6769	-0.355832	0.000201148	83	-0.49537	9.77663e-12	1.00699e-09
249	ceRNA	GPR137C	2.67953	1.64266	0.705942	1.2783e-08	21	0.3541	2.38711e-06	5.49035e-05
250	ceRNA	GPX7	12.7831	24.5809	-0.943304	2.00623e-12	27	-0.69533	6.41275e-15	1.73144e-13
251	ceRNA	GRHL2	42.444	32.3876	0.390118	4.04018e-09	46	0.30518	2.02117e-11	9.29739e-10
252	ceRNA	GRPEL2	12.7836	10.1628	0.330993	5.75864e-09	42	0.23442	4.11705e-11	1.72916e-09
253	ceRNA	GSK3B	28.2614	23.8161	0.246895	4.85104e-05	361	0.16603	5.58618e-38	2.03896e-35
254	ceRNA	GSPT2	4.59957	6.13084	-0.414584	8.2996e-05	24	-0.62928	5.74529e-12	1.37887e-10
255	ceRNA	GTDC1	8.9304	10.8917	-0.286427	0.000222218	29	-0.50323	3.33054e-07	1.03247e-05
256	ceRNA	GXYLT1	9.2823	7.18615	0.369264	4.05109e-08	161	0.22742	1.20106e-23	2.0298e-21
257	ceRNA	HAND2	1.14041	2.1875	-0.939732	4.41333e-08	40	-0.66129	2.12665e-08	1.27599e-06
258	ceRNA	HECTD1	70.653	54.5014	0.374456	7.18425e-05	176	0.18324	8.64208e-18	1.52965e-15
259	ceRNA	HECTD2	9.86009	7.37485	0.418987	2.88421e-07	315	0.25722	3.87021e-31	1.42424e-28
260	ceRNA	HEG1	18.2494	23.115	-0.340981	0.000216408	48	-0.44925	4.17358e-08	3.3806e-06
261	ceRNA	HELZ	12.2333	9.03391	0.437389	4.16534e-09	139	0.20295	3.04036e-22	4.31731e-20
262	ceRNA	HEY2	4.55294	5.85762	-0.363514	0.000707206	59	-0.54739	4.43909e-14	3.15175e-12
263	ceRNA	HIF1AN	20.2454	17.0272	0.249752	3.76234e-05	33	0.19679	7.61272e-07	2.5122e-05
264	ceRNA	HIPK1	30.6048	25.5859	0.258408	0.000122379	289	0.17198	4.0437e-29	1.20502e-26
265	ceRNA	HLTF	35.7832	24.7777	0.53024	2.2059e-09	22	0.2366	2.07985e-07	4.99163e-06
266	ceRNA	HMGCR	32.953	27.3868	0.266931	1.26822e-06	24	0.22769	1.15275e-06	2.76659e-05
267	ceRNA	HMGXB4	19.4323	16.4826	0.237515	0.000299514	108	0.239	5.12819e-20	5.58973e-18
268	ceRNA	HNRNPA2B1	436.242	357.66	0.286538	2.25715e-14	28	0.26783	3.23182e-07	9.69547e-06
269	ceRNA	HNRNPF	237.464	205.808	0.20641	3.70767e-05	35	0.26036	1.37924e-07	4.96526e-06
270	ceRNA	HNRNPH1	217.175	163.427	0.410218	4.37116e-12	47	0.20097	6.31034e-07	3.02897e-05
271	ceRNA	HNRNPK	475.186	417.435	0.186941	4.33037e-08	119	0.21666	1.49575e-20	1.80985e-18
272	ceRNA	HNRNPM	192.346	168.432	0.191537	5.4714e-06	99	0.1977	8.37254e-21	8.28881e-19
273	ceRNA	HNRNPR	127.552	112.706	0.178525	2.49734e-05	39	0.17155	1.58235e-06	6.48763e-05
274	ceRNA	HOOK1	21.158	15.0251	0.49383	5.7799e-08	39	0.22555	7.91119e-09	3.16448e-07
275	ceRNA	HOXA1	0.386014	0.72302	-0.905381	6.49187e-10	25	-0.65536	1.38582e-07	4.43461e-06
276	ceRNA	HOXA10	4.5607	5.84604	-0.358206	0.000151694	66	-0.56242	1.24508e-19	1.09567e-17
277	ceRNA	HOXA3	0.605351	1.50376	-1.31273	1.04137e-10	66	-0.54241	9.44276e-16	8.68734e-14
278	ceRNA	HOXA5	1.06071	2.58368	-1.28439	1.90119e-08	32	-0.77749	8.46075e-14	2.96126e-12
279	ceRNA	HOXA9	2.25216	4.46456	-0.98721	4.6359e-07	109	-0.69808	2.2336e-16	3.75245e-14
280	ceRNA	HSPA8	1222.19	1066.75	0.19624	0.000738211	148	0.2396	5.58099e-21	8.53892e-19
281	ceRNA	HTR2A	0.0445647	0.148153	-1.73311	1.53761e-09	23	-0.97486	3.44756e-07	9.65318e-06
282	ceRNA	IBTK	32.8199	25.8425	0.344825	1.00816e-08	26	0.18206	3.7158e-06	9.66108e-05
283	ceRNA	ICK	16.4164	13.6102	0.270446	0.000136062	153	0.19512	2.37659e-16	3.68372e-14
284	ceRNA	ID4	5.00504	23.2632	-2.2166	2.32301e-21	62	-0.70147	7.55102e-16	6.34285e-14
285	ceRNA	IDE	24.1501	19.1568	0.334178	1.51445e-06	60	0.23468	2.24739e-09	1.41586e-07
286	ceRNA	IGF1	5.45039	7.84749	-0.525872	0.000121961	138	-0.61991	1.94917e-15	4.87294e-13
287	ceRNA	IGSF10	1.12687	2.39322	-1.08664	3.87882e-09	20	-1.02239	1.07773e-09	2.371e-08
288	ceRNA	IKBKAP	20.4118	16.7682	0.283673	2.62522e-07	63	0.19934	9.57787e-11	6.12984e-09
289	ceRNA	INO80	13.43	11.2003	0.261917	2.64077e-05	256	0.16825	3.18279e-33	8.27526e-31
290	ceRNA	INTS2	10.0326	5.63354	0.83258	1.68098e-14	182	0.24359	9.37118e-26	1.79927e-23
291	ceRNA	IPO7	74.0668	61.3657	0.271393	0.000135139	168	0.21275	1.1352e-26	1.97525e-24
292	ceRNA	IQSEC1	27.5207	21.4078	0.362379	0.000707206	118	0.18285	2.35951e-13	2.855e-11
293	ceRNA	IRS1	18.3257	12.0453	0.605398	1.10041e-07	53	0.35619	6.17698e-08	4.32389e-06
294	ceRNA	ISM1	4.62298	7.98766	-0.78895	7.07405e-08	67	-0.83404	2.19314e-26	1.60099e-24
295	ceRNA	ITFG1	50.5807	41.8641	0.272872	0.000611797	38	0.25996	8.03827e-07	3.53684e-05
296	ceRNA	ITGA6	36.5206	58.5597	-0.681197	4.23059e-06	75	-0.34862	1.42757e-08	1.19916e-06
297	ceRNA	KANK1	14.5616	21.4912	-0.561571	1.51445e-06	7	-1.48277	2.51637e-06	2.26473e-05
298	ceRNA	KANSL1	25.227	21.3273	0.242266	0.000782279	150	0.22111	2.43704e-19	3.85052e-17
299	ceRNA	KAT6B	32.786	19.1625	0.774797	8.12645e-05	212	0.30048	3.44891e-14	1.13814e-11
300	ceRNA	KCNA1	0.0581113	0.16527	-1.50793	2.0557e-06	44	-0.57685	1.0664e-11	5.8652e-10
301	ceRNA	KCNH8	0.100338	0.256852	-1.35607	2.4875e-07	21	-0.90253	9.01578e-08	2.07363e-06
302	ceRNA	KCNJ2	1.34092	2.21544	-0.724378	9.57245e-07	76	-0.35658	2.98557e-13	2.95572e-11
303	ceRNA	KCNJ3	53.034	11.6008	2.1927	1.33403e-13	23	0.66401	4.7912e-07	2.49142e-05
304	ceRNA	KIAA0226	13.6962	11.068	0.30739	3.84406e-08	55	0.20885	1.25848e-09	7.04749e-08
305	ceRNA	KIAA0226L	1.83041	2.95855	-0.692723	1.04099e-07	17	-0.65907	2.59438e-06	5.18876e-05
306	ceRNA	KIAA0232	22.7543	16.9769	0.422563	1.01638e-06	45	0.19549	4.95874e-08	2.28102e-06
307	ceRNA	KIAA0528	23.801	19.6215	0.278589	1.59451e-05	68	0.19049	1.08448e-14	7.37447e-13
308	ceRNA	KIAA1109	33.2557	27.0006	0.30061	4.8863e-05	114	0.18508	8.85257e-15	1.03575e-12
309	ceRNA	KIAA1429	57.5581	42.5376	0.43628	0.000172451	19	0.25535	7.71723e-07	1.46627e-05
310	ceRNA	KIAA1468	15.8533	13.1919	0.265137	1.06057e-05	166	0.18534	5.95045e-25	1.01753e-22
311	ceRNA	KIAA1598	52.7107	42.1891	0.321228	5.67149e-06	92	0.21467	1.70142e-17	1.59933e-15
312	ceRNA	KIF16B	33.5368	23.2794	0.526694	1.64023e-07	61	0.36524	2.20906e-14	1.78934e-12
313	ceRNA	KIF21A	15.7206	11.1632	0.493903	1.12561e-10	64	0.26065	5.90729e-14	3.83974e-12
314	ceRNA	KIF23	24.3722	16.3121	0.5793	2.8954e-12	109	0.21734	2.03043e-09	2.55834e-07
315	ceRNA	KIF2A	23.0724	17.6094	0.389823	6.13463e-07	165	0.17609	2.13492e-19	3.62936e-17
316	ceRNA	KIF3B	44.3585	32.1516	0.464317	3.46707e-09	95	0.24895	4.77484e-17	4.6316e-15
317	ceRNA	KIF5B	87.8102	76.9146	0.19113	0.000205888	253	0.17096	1.35409e-29	3.4394e-27
318	ceRNA	KIT	5.47386	15.9573	-1.54358	6.93588e-12	18	-1.05615	8.56547e-07	1.97006e-05
319	ceRNA	KLF5	9.13708	19.866	-1.1205	1.63278e-07	110	-0.75856	2.79718e-13	4.27969e-11
320	ceRNA	KLHL28	7.18496	5.74417	0.322882	0.000627156	254	0.12936	1.2751e-16	3.25151e-14
321	ceRNA	KPNA1	27.6443	23.9395	0.207588	4.9104e-06	77	0.20148	3.5634e-12	2.74382e-10
322	ceRNA	KPNA2	227.552	155.847	0.546067	3.24438e-12	13	0.7266	5.0871e-07	1.37352e-05
323	ceRNA	KRIT1	16.0437	14.3	0.16599	0.000555582	45	0.175	9.6133e-09	4.32598e-07
324	ceRNA	KTN1	164.033	132.038	0.313032	5.71711e-06	76	0.23514	8.27122e-11	6.69969e-09
325	ceRNA	L2HGDH	7.76807	5.57005	0.479866	1.23693e-10	43	0.25234	4.96072e-11	2.28193e-09
326	ceRNA	L3MBTL3	3.54927	4.34051	-0.290345	4.0619e-05	123	-0.27682	2.9364e-12	4.05223e-10
327	ceRNA	LARP1	80.7012	60.9801	0.404253	7.29548e-13	147	0.2207	3.4067e-27	5.04192e-25
328	ceRNA	LARP4	34.7789	25.0485	0.47349	1.38643e-12	291	0.21819	3.89602e-39	1.13764e-36
329	ceRNA	LBH	30.4977	42.0686	-0.464043	6.3208e-08	23	-0.67194	3.46574e-10	8.66435e-09
330	ceRNA	LCLAT1	10.2827	9.02395	0.188382	2.46031e-05	56	0.16516	7.95051e-09	4.53179e-07
331	ceRNA	LCOR	3.99034	2.95871	0.431541	0.000470469	1061	0.18629	2.21798e-65	2.5662e-62
332	ceRNA	LCORL	2.58746	2.01855	0.35822	4.83361e-05	606	0.21374	1.91588e-67	1.26448e-64
333	ceRNA	LEMD3	17.1299	13.8727	0.304266	0.000318548	117	0.24616	7.62777e-10	1.24333e-07
334	ceRNA	LHFP	21.0542	28.3932	-0.43144	9.25436e-06	127	-0.56697	2.33999e-25	3.74399e-23
335	ceRNA	LIN54	7.73374	5.57775	0.471484	3.26223e-11	215	0.19946	1.65836e-29	3.74789e-27
336	ceRNA	LIN9	8.10769	7.0341	0.204925	0.000256901	53	0.20523	1.87325e-07	1.06775e-05
337	ceRNA	LIX1L	14.6921	21.6116	-0.556766	1.56253e-11	24	-0.61805	3.24078e-10	8.75012e-09
338	ceRNA	LMBRD2	10.8874	7.19313	0.597962	2.88421e-07	31	0.2199	3.30978e-09	1.02603e-07
339	ceRNA	LMLN	6.08285	4.58301	0.408453	6.8367e-06	99	0.25097	1.32704e-18	1.38012e-16
340	ceRNA	LMO2	12.0475	15.273	-0.342249	1.9941e-05	19	-0.88876	2.6616e-10	5.58935e-09
341	ceRNA	LMOD1	7.22354	11.8221	-0.710712	5.36306e-06	7	-0.6797	1.35433e-05	9.48031e-05
342	ceRNA	LMTK2	7.38735	5.60411	0.398573	0.000294683	31	0.19573	3.33145e-07	1.03275e-05
343	ceRNA	LOX	21.0228	30.216	-0.52336	2.8655e-05	21	-0.47684	6.84286e-08	1.77914e-06
344	ceRNA	LOXL4	0.958037	4.49557	-2.23035	8.44886e-16	14	-0.99857	2.8015e-07	4.76255e-06
345	ceRNA	LPHN2	9.84851	14.1669	-0.524552	1.29014e-11	168	-0.5861	6.08381e-17	1.77647e-14
346	ceRNA	LPHN3	0.619714	1.30172	-1.07074	9.38997e-07	38	-0.67222	1.64538e-09	7.73327e-08
347	ceRNA	LRBA	81.9295	57.8345	0.502453	2.55546e-07	29	0.38797	1.67859e-07	7.05007e-06
348	ceRNA	LRCH2	0.475938	0.716464	-0.590122	7.11229e-06	146	-0.42953	3.45323e-10	8.56401e-08
349	ceRNA	LRFN5	0.265365	0.366424	-0.465536	8.53531e-05	13	-1.68784	4.35165e-06	9.13846e-05
350	ceRNA	LRIG3	5.47419	9.52892	-0.799667	3.389e-10	45	-0.51958	4.84609e-16	2.47151e-14
351	ceRNA	LRP4	2.0492	4.82556	-1.23563	0.000402743	46	-0.75181	4.30882e-12	2.45603e-10
352	ceRNA	LRRC1	30.6132	25.538	0.261507	0.000619432	54	0.24927	9.35954e-10	5.33494e-08
353	ceRNA	LRRC57	15.0441	12.2849	0.292313	3.96536e-06	38	0.20389	3.67773e-08	1.43431e-06
354	ceRNA	LRRC58	19.4559	16.2219	0.262268	0.000152207	31	0.21877	1.76427e-06	6.35136e-05
355	ceRNA	LUC7L2	82.3127	71.2205	0.208821	1.02019e-05	57	0.1873	2.69563e-09	1.61738e-07
356	ceRNA	LYSMD3	15.3973	12.2278	0.332518	4.87119e-06	247	0.17913	6.09509e-25	1.57253e-22
357	ceRNA	MAB21L1	0.566798	0.862946	-0.606434	0.000368251	79	-0.71455	4.70657e-12	6.07147e-10
358	ceRNA	MAP2K1	45.7548	41.7095	0.133549	0.000132401	31	0.20758	1.17421e-06	3.75747e-05
359	ceRNA	MAP4K3	23.0471	19.3089	0.255317	0.000113077	209	0.24671	4.35313e-28	9.66395e-26
360	ceRNA	MAP4K4	27.9106	36.2546	-0.377351	0.000437441	226	-0.43523	1.63677e-23	4.82846e-21
361	ceRNA	MAPK4	0.135155	2.10055	-3.95808	4.37164e-19	53	-1.05675	9.7105e-15	8.35103e-13
362	ceRNA	MAPRE1	137.882	117.352	0.232582	3.95951e-05	201	0.1931	1.11262e-18	2.44775e-16
363	ceRNA	MARCH6	63.0168	46.1155	0.450483	1.78381e-06	233	0.20147	1.29932e-36	3.06638e-34
364	ceRNA	MARS	76.2746	63.2063	0.271134	7.88874e-07	50	0.24034	6.04748e-12	3.02374e-10
365	ceRNA	MAST4	26.1193	17.3716	0.588389	0.000259437	148	0.33695	3.35874e-08	8.16173e-06
366	ceRNA	MASTL	12.8963	10.3019	0.324039	1.1106e-07	98	0.25023	6.80313e-13	6.80313e-11
367	ceRNA	MATR3	214.718	184.15	0.221564	3.59726e-06	175	0.21453	2.34019e-25	4.30594e-23
368	ceRNA	MBTD1	14.1312	11.5572	0.290092	0.000206573	294	0.20253	3.47871e-36	1.0784e-33
369	ceRNA	MBTPS2	20.1154	14.9119	0.431831	1.10041e-07	102	0.25827	1.54715e-19	1.62451e-17
370	ceRNA	MED1	50.4864	34.1165	0.565427	0.00051864	61	0.20193	9.14673e-09	5.5795e-07
371	ceRNA	MED12L	0.684107	0.396695	0.786191	1.83778e-07	64	0.26035	1.5867e-15	1.04722e-13
372	ceRNA	MED13	30.8532	20.3007	0.60389	1.3661e-07	394	0.18881	8.21573e-31	3.42596e-28
373	ceRNA	MED13L	47.3809	33.4479	0.50239	6.44194e-06	222	0.18589	1.96882e-15	4.68579e-13
374	ceRNA	MED14	28.9926	25.0025	0.213615	0.000295641	49	0.19844	6.30462e-09	3.2784e-07
375	ceRNA	MEF2C	6.48963	8.5941	-0.40521	5.05024e-06	223	-0.16665	1.7441e-07	3.90679e-05
376	ceRNA	MEIS2	2.46887	4.53196	-0.876287	4.93844e-11	14	-1.1579	4.68479e-06	8.90111e-05
377	ceRNA	MET	6.38878	13.0291	-1.02812	1.40359e-08	90	-0.6639	7.3629e-20	8.90911e-18
378	ceRNA	MEX3B	2.2079	2.99102	-0.437961	0.000636907	161	-0.55671	7.87866e-23	2.01694e-20
379	ceRNA	MIER3	14.5979	11.071	0.398978	7.40243e-09	867	0.20318	4.62505e-74	4.28742e-71
380	ceRNA	MINPP1	17.328	14.834	0.2242	0.000932393	16	0.33831	8.21075e-07	1.56004e-05
381	ceRNA	MKL2	37.532	24.9386	0.589739	1.60243e-08	367	0.23239	5.57412e-25	2.3467e-22
382	ceRNA	MOB3B	1.79648	3.93321	-1.13053	1.84172e-13	58	-0.75842	5.9921e-17	5.21313e-15
383	ceRNA	MPHOSPH9	9.38309	5.67403	0.72569	1.03478e-12	135	0.20096	9.31911e-21	1.30467e-18
384	ceRNA	MSL1	141.461	112.364	0.332219	1.21552e-06	80	0.21043	4.3766e-11	3.67634e-09
385	ceRNA	MTDH	70.9493	51.8307	0.452982	1.38308e-08	194	0.23902	3.65994e-30	7.53948e-28
386	ceRNA	MTMR4	29.8461	21.2586	0.489491	1.39786e-06	90	0.20687	6.22457e-16	5.66436e-14
387	ceRNA	MYB	64.3235	48.2551	0.414666	1.913e-05	117	0.33951	4.82385e-07	8.87588e-05
388	ceRNA	MYBL1	11.5086	7.18406	0.679847	3.13e-12	107	0.30099	7.04796e-18	7.75275e-16
389	ceRNA	MYCN	1.30233	2.21648	-0.767169	2.99561e-05	51	-0.58369	3.40626e-12	2.18001e-10
390	ceRNA	MYEF2	13.7611	8.7991	0.645166	4.70922e-10	48	0.25471	1.14054e-11	5.58865e-10
391	ceRNA	MYLK	30.2257	71.4257	-1.24067	1.30894e-13	29	-0.66326	1.42196e-07	5.68786e-06
392	ceRNA	NAA15	24.6422	21.4578	0.199623	0.000316496	390	0.17748	5.50778e-42	2.23616e-39
393	ceRNA	NAA25	11.8591	10.3853	0.191459	0.000491677	171	0.21649	1.66657e-27	2.99983e-25
394	ceRNA	NABP1	3.60038	5.29959	-0.557733	2.09584e-07	44	-0.38774	2.15504e-11	1.14217e-09
395	ceRNA	NAP1L3	1.81867	2.52877	-0.475546	0.000417102	27	-0.45471	4.97769e-07	1.9413e-05
396	ceRNA	NCAM1	1.08847	2.33308	-1.09993	1.24047e-07	22	-0.507	3.16233e-09	8.22206e-08
397	ceRNA	NCK2	27.0802	39.4473	-0.542688	1.42448e-08	47	-0.82219	4.80504e-09	3.79598e-07
398	ceRNA	NCOA2	25.3147	17.7024	0.516035	4.03232e-05	70	0.24242	6.64342e-11	5.18187e-09
399	ceRNA	NCOA3	28.2076	18.5949	0.601172	1.11322e-08	363	0.17912	2.28513e-30	8.72919e-28
400	ceRNA	NCOA6	30.6868	24.5438	0.322256	4.37803e-07	68	0.217	3.13e-12	2.1597e-10
401	ceRNA	NCOA7	13.4323	27.1752	-1.01659	1.53868e-07	27	-0.45063	2.37522e-07	7.12567e-06
402	ceRNA	NECAP1	38.8973	28.4746	0.449992	1.22426e-11	26	0.40447	2.25499e-07	5.86298e-06
403	ceRNA	NEDD4L	26.7489	17.9471	0.575733	2.59207e-05	31	0.33614	1.3302e-06	4.12362e-05
404	ceRNA	NEFM	0.0962259	0.311115	-1.69295	1.53168e-07	16	-1.07191	2.22589e-06	5.56474e-05
405	ceRNA	NF1	28.0547	22.2502	0.334423	0.000156388	277	0.22979	1.07547e-30	3.21566e-28
406	ceRNA	NFIB	14.3348	33.3426	-1.21785	6.40021e-09	232	-0.71995	3.83175e-17	1.75111e-14
407	ceRNA	NHSL1	3.51259	5.27868	-0.58764	7.5217e-05	41	-0.45957	9.84529e-09	4.72574e-07
408	ceRNA	NIPBL	29.036	25.1988	0.204487	0.000110762	220	0.17983	3.02186e-23	6.82941e-21
409	ceRNA	NLK	20.6734	14.3641	0.525307	3.64731e-08	217	0.32739	3.18827e-31	8.6721e-29
410	ceRNA	NMT2	3.65624	5.42831	-0.57014	2.17881e-06	12	-0.79938	5.30801e-06	6.36961e-05
411	ceRNA	NPAS2	5.93925	10.6427	-0.841508	5.91771e-08	18	-0.70856	1.04524e-06	2.40405e-05
412	ceRNA	NPAS3	0.691774	1.05642	-0.610817	1.50006e-05	77	-0.38664	2.61065e-09	2.50623e-07
413	ceRNA	NPEPPS	78.1901	57.0006	0.45601	1.23756e-09	28	0.25883	2.25459e-07	6.31286e-06
414	ceRNA	NR3C2	2.17164	2.31748	-0.0937731	0.000437441	41	-0.69517	1.41835e-07	9.2193e-06
415	ceRNA	NRBF2	19.6144	23.0537	-0.23308	0.000479454	132	-0.33481	2.29662e-15	3.88129e-13
416	ceRNA	NREP	65.0359	83.5703	-0.361755	0.000735961	46	-0.54066	9.58508e-14	5.36764e-12
417	ceRNA	NRG1	2.21361	2.37153	-0.0994204	7.49061e-11	19	-0.8808	2.27393e-08	5.00266e-07
418	ceRNA	NRG2	0.0957282	0.594508	-2.63468	3.6018e-13	20	-0.90499	5.65054e-08	1.75167e-06
419	ceRNA	NRIP1	43.3775	32.766	0.404747	3.02907e-05	145	0.2406	4.27522e-21	6.7976e-19
420	ceRNA	NSD1	21.6588	17.4023	0.315677	9.69798e-06	37	0.22309	3.24469e-08	1.20053e-06
421	ceRNA	NUDT11	1.13893	1.89431	-0.733996	9.69798e-06	36	-0.71163	1.72496e-15	6.55483e-14
422	ceRNA	NUFIP2	31.3923	24.8309	0.338274	4.67702e-07	707	0.20036	7.81046e-73	5.73287e-70
423	ceRNA	NUPL1	25.1799	22.1424	0.185461	0.000540175	72	0.23787	2.10196e-09	1.66055e-07
424	ceRNA	ORC2	15.6248	13.9987	0.158542	0.000471953	25	0.19362	6.25116e-07	1.56279e-05
425	ceRNA	OSBPL3	3.65396	5.41757	-0.568185	3.65613e-06	17	-0.60002	2.20103e-07	3.74175e-06
426	ceRNA	OSR1	1.17718	7.7238	-2.71398	7.91292e-14	39	-1.15455	1.1603e-15	6.26561e-14
427	ceRNA	OTUD6B	12.0128	8.61799	0.479151	2.57847e-07	42	0.22747	1.7132e-06	7.36677e-05
428	ceRNA	OXR1	38.819	28.1203	0.465152	1.98005e-06	272	0.18205	3.99664e-30	1.11506e-27
429	ceRNA	PAIP1	56.5728	49.9447	0.179777	0.00016067	72	0.29941	9.70407e-17	7.8603e-15
430	ceRNA	PAIP2	169.151	130.301	0.376462	1.84275e-14	48	0.34026	3.30081e-08	1.84846e-06
431	ceRNA	PAK7	0.046816	0.192188	-2.03745	9.80183e-08	57	-0.86017	9.4641e-09	7.8552e-07
432	ceRNA	PALM2	0.305137	0.821781	-1.4293	2.19283e-10	45	-0.69968	5.45751e-15	3.00163e-13
433	ceRNA	PALM2-AKAP2	10.5806	13.1965	-0.318744	1.06887e-05	41	-0.42701	3.85753e-08	2.00591e-06
434	ceRNA	PAPD4	28.2492	24.2909	0.217794	0.000382678	307	0.22085	4.95274e-33	1.6344e-30
435	ceRNA	PARD6B	34.9412	15.5506	1.16796	2.31607e-10	42	0.39216	1.59729e-09	9.26426e-08
436	ceRNA	PAXIP1	19.6539	13.9233	0.497316	1.48287e-06	93	0.22781	1.64275e-18	1.57704e-16
437	ceRNA	PCLO	7.96944	5.53702	0.525368	0.000153246	30	0.37874	1.62473e-06	5.36162e-05
438	ceRNA	PDCD6IP	66.9895	58.6481	0.191853	0.000422445	48	0.21928	5.27613e-09	2.63807e-07
439	ceRNA	PDE12	17.2085	14.4363	0.253417	7.70936e-05	93	0.21285	3.29425e-18	3.06366e-16
440	ceRNA	PDE4B	15.3465	25.4115	-0.727574	3.58761e-05	21	-0.75432	8.0326e-11	1.8475e-09
441	ceRNA	PDGFRA	12.5162	19.2874	-0.623858	7.65357e-07	154	-0.46772	2.94902e-22	5.83906e-20
442	ceRNA	PDIK1L	14.1456	11.3091	0.322864	3.77701e-06	495	0.23616	3.65781e-67	1.89109e-64
443	ceRNA	PDPK1	26.4615	22.3585	0.243073	6.62239e-05	29	0.25718	3.61625e-09	1.08487e-07
444	ceRNA	PDS5A	54.1259	41.4883	0.383614	7.25555e-09	414	0.19886	4.85796e-52	2.10836e-49
445	ceRNA	PELI1	9.92985	17.1416	-0.787654	2.87686e-11	166	-0.60222	1.41058e-10	4.1612e-08
446	ceRNA	PGGT1B	20.3368	17.1288	0.247669	1.47727e-05	58	0.24603	7.82405e-10	4.77267e-08
447	ceRNA	PHAX	36.18	28.2111	0.358927	3.3113e-09	55	0.27535	7.85312e-10	4.63334e-08
448	ceRNA	PHC3	15.3497	12.9059	0.250174	0.000268956	110	0.18763	2.35897e-15	2.64204e-13
449	ceRNA	PHF12	35.7572	30.7303	0.218574	4.67896e-05	33	0.27484	1.66173e-07	6.81309e-06
450	ceRNA	PHF15	22.2236	17.7268	0.326159	0.000452951	60	0.24883	3.55174e-09	2.37967e-07
451	ceRNA	PHF20	33.3348	26.3463	0.339429	3.82318e-06	176	0.24297	3.13106e-26	5.82378e-24
452	ceRNA	PHF20L1	27.9455	22.904	0.287014	0.000445854	316	0.18143	3.42082e-33	1.14597e-30
453	ceRNA	PHTF2	18.2923	13.7776	0.408911	9.59369e-09	327	0.18411	7.90283e-28	2.70277e-25
454	ceRNA	PID1	2.40341	3.74085	-0.638284	1.50391e-07	18	-0.53445	1.5173e-07	3.33806e-06
455	ceRNA	PIP5K1B	2.08294	3.02662	-0.539084	8.59512e-05	12	-0.4799	8.09683e-06	9.7162e-05
456	ceRNA	PKIA	4.71823	6.63479	-0.491807	3.68247e-08	73	-0.63852	2.08331e-16	2.20831e-14
457	ceRNA	PLAGL1	3.21567	7.20984	-1.16485	6.48958e-13	78	-0.69214	2.7768e-17	3.05448e-15
458	ceRNA	PLEKHF2	99.3205	62.865	0.659833	9.64138e-09	90	0.25017	3.9619e-08	4.00152e-06
459	ceRNA	PLEKHO1	40.7357	50.0237	-0.296319	0.000279711	19	-0.48356	8.99541e-07	1.88904e-05
460	ceRNA	PLS3	55.4631	90.1316	-0.700507	2.73903e-09	25	-0.57367	3.83555e-08	1.11231e-06
461	ceRNA	PLXNA2	4.48671	5.52114	-0.299307	0.000390089	21	-0.43221	1.21837e-07	2.68041e-06
462	ceRNA	PNN	55.3616	46.4129	0.254359	6.51923e-06	56	0.2166	8.40818e-11	5.04491e-09
463	ceRNA	PNRC1	47.1999	69.976	-0.568077	3.27355e-15	36	-0.50227	2.66046e-07	1.11739e-05
464	ceRNA	POLK	12.0368	10.3925	0.211908	0.000265454	36	0.19735	9.87165e-08	3.65251e-06
465	ceRNA	POLQ	2.88651	1.77657	0.700235	2.97883e-15	51	0.24536	2.73335e-07	1.50334e-05
466	ceRNA	POU2F2	1.81812	2.10896	-0.214086	0.000174195	20	-0.27344	3.70794e-07	7.41588e-06
467	ceRNA	PPAP2B	27.2243	34.4892	-0.341249	0.000271613	87	-0.54989	2.62659e-11	3.99241e-09
468	ceRNA	PPARGC1A	0.259557	1.05533	-2.02358	1.98041e-11	134	-0.68782	5.66434e-27	1.0479e-24
469	ceRNA	PPFIA1	71.9032	39.1315	0.877725	1.56009e-10	99	0.20097	5.94769e-16	6.12612e-14
470	ceRNA	PPHLN1	50.5571	44.7845	0.174915	0.000105535	20	0.36955	8.33048e-08	1.99932e-06
471	ceRNA	PPIP5K2	25.1902	20.3592	0.307185	1.15019e-06	66	0.24339	2.71035e-11	1.92435e-09
472	ceRNA	PPM1A	26.9855	21.958	0.297439	1.10681e-05	376	0.24065	2.94877e-33	1.23553e-30
473	ceRNA	PPM1D	16.6957	11.2572	0.568635	4.55518e-07	119	0.23714	1.69032e-19	2.07909e-17
474	ceRNA	PPP1R15B	41.7583	34.3018	0.283779	3.58268e-06	182	0.19629	6.98889e-23	1.36283e-20
475	ceRNA	PPP2CA	128.782	111.01	0.214245	4.93011e-06	50	0.21864	1.47666e-09	7.53098e-08
476	ceRNA	PPP6R3	76.1355	50.7426	0.585372	3.81177e-12	162	0.22888	1.74014e-27	2.85384e-25
477	ceRNA	PRDM4	29.0408	25.3154	0.198065	0.000801576	41	0.26664	1.38473e-08	6.50822e-07
478	ceRNA	PRICKLE1	8.81587	16.0014	-0.860023	6.69493e-12	16	-0.57293	1.88853e-08	3.2105e-07
479	ceRNA	PRKAR1A	208.342	156.681	0.411127	1.78836e-07	124	0.24557	2.82433e-11	4.20826e-09
480	ceRNA	PRPF39	19.3873	17.0394	0.186237	0.000483997	71	0.18916	9.10458e-13	6.5553e-11
481	ceRNA	PRR14L	12.3199	10.4504	0.237436	0.000652852	105	0.17424	2.77308e-14	2.93946e-12
482	ceRNA	PRR5L	3.61505	4.71562	-0.383433	0.000543576	45	-0.44472	2.86246e-15	1.48848e-13
483	ceRNA	PTBP3	58.4739	48.6944	0.264036	7.70936e-05	220	0.209	2.8187e-31	6.48302e-29
484	ceRNA	PTCH1	1.784	2.37831	-0.414817	0.000189423	43	-0.7545	4.8972e-10	2.64449e-08
485	ceRNA	PTCHD1	0.0974329	1.03718	-3.41211	3.25969e-13	46	-0.62717	2.98419e-11	1.55178e-09
486	ceRNA	PTGES3	421.023	334.108	0.333587	2.31094e-09	84	0.2038	6.63285e-14	5.70425e-12
487	ceRNA	PTPRZ1	1.69215	2.41076	-0.510635	2.76106e-08	11	-1.30855	1.05138e-07	1.36679e-06
488	ceRNA	PUM2	71.6245	63.8806	0.165074	0.000128832	274	0.2126	7.092e-33	2.03541e-30
489	ceRNA	PURA	12.6146	10.9924	0.19858	0.000553855	403	0.18963	1.89964e-31	8.14947e-29
490	ceRNA	PURB	23.9357	19.7131	0.280012	1.67537e-05	494	0.17637	1.38642e-48	7.15394e-46
491	ceRNA	PWWP2A	11.4402	9.60207	0.252691	1.72704e-05	231	0.18519	2.64172e-21	6.47221e-19
492	ceRNA	QKI	22.8362	29.9436	-0.390923	2.516e-05	354	-0.14221	1.74907e-07	6.29665e-05
493	ceRNA	RAB11A	186.044	165.183	0.171579	0.000335455	58	0.2826	1.79e-10	1.1098e-08
494	ceRNA	RAB21	43.7788	35.9431	0.284517	2.00916e-05	54	0.15724	5.10908e-07	3.01435e-05
495	ceRNA	RAB22A	19.7128	15.7628	0.322612	7.51658e-06	58	0.18878	9.23477e-10	5.35617e-08
496	ceRNA	RAB5B	151.877	128.676	0.239167	6.13463e-07	116	0.21232	2.47199e-08	3.33718e-06
497	ceRNA	RABEP1	88.8276	63.9856	0.473262	1.18709e-08	179	0.25045	2.17206e-13	4.75681e-11
498	ceRNA	RACGAP1	46.857	27.1547	0.787061	1.07404e-19	153	0.27205	3.28733e-25	5.25973e-23
499	ceRNA	RAD21	305.331	224.563	0.443256	7.0843e-06	191	0.25586	2.30073e-32	4.46342e-30
500	ceRNA	RAD23B	165.883	140.668	0.237873	5.21336e-05	191	0.23816	2.68824e-28	5.37647e-26
501	ceRNA	RAF1	71.5721	64.491	0.150301	0.000203164	26	0.20976	7.61102e-07	1.97886e-05
502	ceRNA	RALGPS1	7.56309	5.52006	0.45429	1.17992e-06	62	0.25906	7.76442e-13	4.81394e-11
503	ceRNA	RANBP9	59.6714	48.9186	0.286655	7.00094e-06	76	0.35198	3.50292e-17	2.83736e-15
504	ceRNA	RAP2B	10.4617	12.9047	-0.302783	0.000538493	22	-0.69157	8.79206e-08	2.19802e-06
505	ceRNA	RAP2C	43.5095	31.2008	0.479748	3.7161e-06	277	0.25013	3.16365e-26	1.03135e-23
506	ceRNA	RARB	2.82872	4.97352	-0.814121	1.20669e-07	76	-0.79751	9.29719e-16	1.06918e-13
507	ceRNA	RASA1	31.0387	26.0101	0.254997	0.000548683	268	0.17069	1.17026e-16	3.24162e-14
508	ceRNA	RB1CC1	32.129	25.0647	0.358221	7.68233e-05	373	0.17659	6.76839e-40	2.58552e-37
509	ceRNA	RBBP7	281.857	182.511	0.626983	1.13186e-09	13	0.33127	6.31469e-06	8.2091e-05
510	ceRNA	RBL1	7.20403	4.97287	0.534724	3.36238e-09	33	0.25243	1.3945e-06	4.7413e-05
511	ceRNA	RBM12	32.6008	27.3545	0.253129	1.77638e-06	300	0.18645	3.01686e-31	9.35227e-29
512	ceRNA	RBM12B	12.1284	9.50698	0.351329	4.96917e-08	33	0.18565	2.23761e-06	7.38411e-05
513	ceRNA	RBM27	17.8968	14.5264	0.301021	6.18995e-05	370	0.19242	1.10883e-37	4.21357e-35
514	ceRNA	RBM47	66.3168	48.3548	0.455714	3.59548e-08	115	0.34875	2.21757e-16	3.41505e-14
515	ceRNA	RBMS1	18.1858	26.4425	-0.540046	1.56588e-09	299	-0.44848	1.84999e-17	7.62194e-15
516	ceRNA	RECK	5.6269	8.16401	-0.536938	2.2245e-06	171	-0.38861	2.4164e-13	5.84768e-11
517	ceRNA	RELN	0.489398	0.551401	-0.172092	1.01225e-05	35	-0.60618	1.60994e-09	7.8887e-08
518	ceRNA	RGL1	6.86261	9.30909	-0.439883	2.05509e-05	131	-0.47819	5.15734e-21	8.81905e-19
519	ceRNA	RGMA	2.65452	12.32	-2.21448	1.28804e-18	100	-0.70225	4.83223e-10	8.06982e-08
520	ceRNA	RHOT1	32.1354	25.8082	0.316336	1.22388e-05	135	0.19767	1.13062e-19	1.60548e-17
521	ceRNA	RIC8B	9.02968	7.32864	0.30113	1.06057e-05	74	0.21263	3.07712e-17	2.27707e-15
522	ceRNA	RND3	19.1442	33.8754	-0.823328	3.33737e-11	19	-0.57356	2.35298e-06	4.70595e-05
523	ceRNA	RNF111	13.4828	11.6882	0.206061	0.000574959	347	0.22188	6.63217e-28	2.6396e-25
524	ceRNA	RNF145	17.063	26.0593	-0.610931	3.3758e-11	155	-0.60962	1.11039e-20	2.89811e-18
525	ceRNA	RNF4	56.9427	47.7867	0.252903	3.0057e-06	29	0.23292	8.37795e-07	2.51339e-05
526	ceRNA	RPRD1A	47.3412	37.3061	0.343684	1.73232e-06	66	0.22388	2.00163e-14	1.34109e-12
527	ceRNA	RPS6KA3	7.14319	9.76103	-0.450465	9.85047e-06	69	-0.34485	4.40051e-08	4.18049e-06
528	ceRNA	RPS6KB1	28.5199	19.7943	0.526884	4.58434e-10	431	0.24259	1.33489e-60	6.18056e-58
529	ceRNA	RSBN1L	18.4341	15.3031	0.268554	4.09152e-05	252	0.18058	4.00888e-37	1.01024e-34
530	ceRNA	RSRC2	67.2118	58.0873	0.210491	6.10802e-07	103	0.22762	1.58959e-21	1.63728e-19
531	ceRNA	RTF1	40.9447	33.6767	0.281925	4.49445e-06	88	0.21491	5.86091e-17	5.33342e-15
532	ceRNA	RUFY2	8.35554	6.98558	0.258354	0.000212847	254	0.20084	8.40534e-29	2.26944e-26
533	ceRNA	RUNX3	5.22461	8.79095	-0.750697	6.16799e-05	58	-0.42503	9.19429e-13	6.06823e-11
534	ceRNA	RYR3	0.0333888	0.132713	-1.99087	3.34629e-08	44	-0.68876	2.31247e-10	1.27186e-08
535	ceRNA	S100PBP	15.0845	12.5267	0.268055	0.000543576	62	0.23031	6.49953e-10	4.87465e-08
536	ceRNA	S1PR1	11.3794	15.5426	-0.449812	0.000485521	84	-0.49103	3.47222e-20	3.50695e-18
537	ceRNA	SACS	2.83082	3.80793	-0.42779	1.68813e-05	67	-0.42331	2.80384e-12	2.29915e-10
538	ceRNA	SAMD4A	2.91324	4.36582	-0.583628	3.3978e-06	111	-0.53011	2.23799e-17	3.93886e-15
539	ceRNA	SAP30L	17.5861	14.3763	0.290741	2.20728e-05	79	0.19734	2.93739e-11	2.46741e-09
540	ceRNA	SBNO1	29.5002	22.4802	0.39207	1.33207e-05	170	0.17829	1.46614e-22	2.53643e-20
541	ceRNA	SCAF11	36.643	31.4711	0.219508	0.000502613	86	0.16517	1.48317e-10	1.27553e-08
542	ceRNA	SCAMP1	28.7555	23.3478	0.300552	1.53483e-05	35	0.27339	4.42843e-09	1.59424e-07
543	ceRNA	SCHIP1	5.85624	12.2429	-1.0639	3.93645e-11	73	-0.51831	3.28559e-15	2.89132e-13
544	ceRNA	SCN2A	0.155339	0.491572	-1.66198	1.06475e-10	120	-0.76921	2.71407e-18	4.99389e-16
545	ceRNA	SCN3A	0.14954	0.363456	-1.28125	5.86234e-08	183	-0.57425	2.73832e-17	6.79103e-15
546	ceRNA	SEC23IP	39.5267	32.3222	0.290302	0.000107372	53	0.22335	3.92896e-09	2.08235e-07
547	ceRNA	SEC24D	60.4104	44.9377	0.426871	1.36835e-05	39	0.267	7.60409e-09	3.57392e-07
548	ceRNA	SEL1L3	16.149	22.3341	-0.467806	0.000316496	71	-0.40836	2.21114e-07	2.12269e-05
549	ceRNA	SENP1	13.7317	11.0274	0.316417	1.2286e-05	176	0.19828	2.66472e-24	4.87643e-22
550	ceRNA	SENP2	29.3453	23.9004	0.296099	3.85973e-05	61	0.18516	8.51282e-12	5.27795e-10
551	ceRNA	SENP7	9.06626	7.59036	0.25634	0.000138877	22	0.2378	3.38891e-06	7.4556e-05
552	ceRNA	SERINC3	126.882	91.4266	0.472796	6.83212e-09	166	0.22417	1.44092e-21	2.46398e-19
553	ceRNA	SERPINE2	21.1266	46.1933	-1.12863	2.64635e-12	48	-0.54199	2.24175e-13	1.25538e-11
554	ceRNA	SETD1B	15.2322	11.9483	0.350319	6.12429e-05	222	0.21613	3.57674e-42	8.0119e-40
555	ceRNA	SETD7	38.485	31.5717	0.285664	0.000589435	198	0.16088	1.74395e-18	3.55767e-16
556	ceRNA	SFXN1	36.7897	22.4888	0.710094	1.62334e-13	25	0.29907	3.27525e-10	8.84318e-09
557	ceRNA	SGCE	28.361	38.6421	-0.446264	1.65641e-05	13	-0.61964	9.28763e-07	1.30027e-05
558	ceRNA	SGK1	27.1577	41.3786	-0.60752	2.15189e-06	59	-0.50361	1.3381e-18	9.09905e-17
559	ceRNA	SH3KBP1	12.5529	16.4966	-0.394155	0.000569603	54	-0.56238	4.10554e-12	2.87388e-10
560	ceRNA	SH3RF3	2.10151	2.33532	-0.152193	1.72051e-05	27	-0.42757	6.02738e-11	1.86849e-09
561	ceRNA	SIRPA	19.6544	30.1236	-0.616038	1.44928e-05	83	-0.46545	1.43703e-21	1.37955e-19
562	ceRNA	SIX4	12.3259	7.3045	0.75484	1.68442e-09	97	0.28733	2.55447e-22	2.65665e-20
563	ceRNA	SKI	23.8049	31.7807	-0.41689	1.25058e-09	91	-0.36584	4.77857e-11	5.87764e-09
564	ceRNA	SLC10A7	5.95578	5.14305	0.211668	0.000183801	63	0.2373	5.21148e-10	3.49169e-08
565	ceRNA	SLC16A6	39.3554	12.6531	1.63707	5.8105e-12	32	0.52822	1.49388e-06	9.26205e-05
566	ceRNA	SLC22A5	24.0296	15.1753	0.663083	1.14797e-12	43	0.44976	8.52505e-11	5.45603e-09
567	ceRNA	SLC2A3	10.4856	14.9667	-0.513345	0.000163955	19	-0.55424	1.11632e-10	2.12101e-09
568	ceRNA	SLC30A5	59.9387	48.4442	0.307165	3.11175e-07	30	0.28676	1.06551e-07	3.7293e-06
569	ceRNA	SLC33A1	29.1971	24.8659	0.231656	0.000665041	78	0.15976	1.18924e-12	9.7518e-11
570	ceRNA	SLC35F3	0.587888	2.47392	-2.07319	3.66687e-12	13	-1.55743	7.51842e-08	1.20295e-06
571	ceRNA	SLC6A15	0.298503	1.18552	-1.9897	8.1839e-05	19	-0.94824	3.02171e-07	6.64775e-06
572	ceRNA	SLC9A6	4.29239	5.53884	-0.367802	0.000660962	163	-0.40612	2.19886e-18	4.59561e-16
573	ceRNA	SLMO2	96.7936	69.4686	0.478552	6.56303e-09	24	0.218	3.62265e-07	8.69435e-06
574	ceRNA	SMAD5	23.6712	19.6815	0.266293	8.6557e-05	274	0.17142	5.86502e-23	1.6598e-20
575	ceRNA	SMARCA5	70.9786	61.2408	0.212893	8.96317e-05	59	0.26126	4.81842e-13	2.93924e-11
576	ceRNA	SMARCC2	53.9167	42.7867	0.33357	9.31182e-09	31	0.2555	1.23644e-07	3.9566e-06
577	ceRNA	SMARCD2	163.038	129.968	0.32705	2.96904e-06	11	0.43265	6.73978e-06	7.41376e-05
578	ceRNA	SMC1A	40.9703	30.3034	0.435101	1.21079e-08	58	0.16075	1.16208e-07	6.85626e-06
579	ceRNA	SNAI2	12.9719	20.0483	-0.628083	2.27567e-08	71	-0.60176	5.32122e-12	5.95977e-10
580	ceRNA	SNX13	16.4887	14.1079	0.224975	0.000598662	368	0.15482	3.68762e-34	1.38654e-31
581	ceRNA	SNX2	72.6845	62.641	0.214541	6.3915e-05	64	0.16229	1.42103e-08	9.09458e-07
582	ceRNA	SNX27	27.9128	21.9152	0.348994	3.77701e-06	55	0.27548	3.45421e-11	2.24524e-09
583	ceRNA	SNX4	39.7252	33.304	0.254359	3.59726e-06	55	0.23203	1.57249e-12	9.27767e-11
584	ceRNA	SOBP	0.821644	1.31996	-0.683907	1.06821e-09	105	-0.57506	1.43557e-23	1.7801e-21
585	ceRNA	SOCS4	9.48532	7.67483	0.305561	1.94738e-06	80	0.17202	5.33758e-12	4.27006e-10
586	ceRNA	SOCS5	13.3303	16.0928	-0.27171	0.00064285	547	-0.01278	3.91534e-15	2.18084e-12
587	ceRNA	SOGA1	18.9424	12.5445	0.594569	3.06646e-09	53	0.27815	7.92735e-15	4.36004e-13
588	ceRNA	SON	148.571	131.204	0.179339	0.000310403	151	0.17444	5.44375e-16	8.32894e-14
589	ceRNA	SOX6	0.249222	1.04852	-2.07284	8.97486e-10	130	-0.62849	2.04411e-08	5.39645e-06
590	ceRNA	SP1	42.5364	37.326	0.188519	0.000382678	276	0.17401	2.5257e-21	7.4003e-19
591	ceRNA	SP2	20.3149	16.6864	0.283866	1.62667e-06	63	0.34647	1.39795e-08	9.78567e-07
592	ceRNA	SPIRE1	19.4597	15.3636	0.340975	0.000134222	34	0.21797	8.32267e-07	2.91293e-05
593	ceRNA	SPOPL	29.9005	25.4401	0.233069	0.000791873	416	0.19513	1.30681e-19	6.521e-17
594	ceRNA	SPRED1	9.96158	12.5424	-0.332363	0.000687942	272	-0.13111	1.88461e-13	5.38999e-11
595	ceRNA	SPRY2	5.88568	10.7327	-0.866736	2.35425e-10	43	-0.66	7.79767e-11	4.28872e-09
596	ceRNA	SPTY2D1	22.065	18.1236	0.283891	0.000205206	323	0.20414	9.32646e-36	3.15234e-33
597	ceRNA	SREK1	38.2595	30.6387	0.320465	3.26795e-07	192	0.17464	1.41841e-19	2.851e-17
598	ceRNA	SRGAP1	8.32093	5.58957	0.574007	2.21556e-05	35	0.25011	5.27113e-07	1.84489e-05
599	ceRNA	SRPK2	49.1816	39.1579	0.328814	2.15344e-07	319	0.21087	1.16115e-47	3.80856e-45
600	ceRNA	SRPX	11.3412	16.5185	-0.542507	7.75712e-06	74	-0.54726	2.53558e-22	2.23131e-20
601	ceRNA	SRSF10	75.739	66.315	0.1917	6.98897e-07	266	0.2058	1.55236e-27	4.33107e-25
602	ceRNA	SRSF12	0.167998	0.801058	-2.25346	5.54766e-16	70	-0.53614	6.10653e-07	7.99956e-05
603	ceRNA	SRSF2	195.697	161.672	0.275554	1.06475e-10	107	0.22488	4.65664e-13	5.44827e-11
604	ceRNA	SRSF7	79.1029	70.0132	0.176103	5.0173e-07	72	0.21975	4.66468e-11	3.40522e-09
605	ceRNA	SS18	67.2578	57.968	0.214444	0.000490136	103	0.24076	4.57078e-15	5.11927e-13
606	ceRNA	SS18L1	13.7969	10.3515	0.414507	1.00316e-07	29	0.22014	8.19519e-07	2.45856e-05
607	ceRNA	STAC	0.330439	2.22774	-2.75312	6.24887e-18	46	-0.81371	1.21683e-14	7.30098e-13
608	ceRNA	STAU1	125.894	103.75	0.279094	1.89708e-07	126	0.21571	2.47474e-20	3.29141e-18
609	ceRNA	STK39	31.2501	24.7935	0.333899	2.36124e-05	55	0.32761	1.50917e-09	1.11678e-07
610	ceRNA	STRBP	49.7716	37.5709	0.405706	7.87809e-11	173	0.29174	1.09722e-37	1.89819e-35
611	ceRNA	STRN3	23.5011	16.5292	0.507716	3.93688e-08	194	0.22591	1.57108e-18	3.34641e-16
612	ceRNA	SUCO	52.3897	41.9709	0.319896	1.19503e-06	106	0.2325	9.09387e-22	9.91232e-20
613	ceRNA	SUPT16H	105.989	86.1114	0.29964	2.84203e-08	25	0.24332	4.06452e-07	1.01613e-05
614	ceRNA	SUZ12	29.4727	22.1495	0.412105	1.87556e-06	304	0.21154	2.51405e-42	7.9444e-40
615	ceRNA	SYDE1	5.21518	7.17585	-0.460431	3.14405e-08	44	-0.48775	2.52903e-15	1.26452e-13
616	ceRNA	SYNJ1	7.57507	6.07213	0.319057	4.26372e-07	315	0.18107	3.32121e-35	1.07275e-32
617	ceRNA	SYT1	17.3448	13.2991	0.383169	1.44375e-05	91	0.38437	9.09442e-09	1.22775e-06
618	ceRNA	TAF4	14.1412	10.6957	0.402872	1.69932e-08	202	0.21275	3.90165e-31	8.0374e-29
619	ceRNA	TANC2	22.742	14.077	0.692018	2.35425e-10	132	0.26698	1.03401e-11	1.62339e-09
620	ceRNA	TAOK1	14.7265	11.1941	0.395667	0.000485521	138	0.17946	1.2655e-14	1.80967e-12
621	ceRNA	TARDBP	82.1914	73.757	0.156208	3.09776e-07	192	0.19607	1.90728e-24	3.75733e-22
622	ceRNA	TBC1D12	7.70577	6.08923	0.339679	0.000121129	99	0.26938	5.80222e-14	7.36881e-12
623	ceRNA	TBC1D15	33.4463	26.5375	0.333813	4.33648e-05	237	0.19786	7.98932e-29	1.91744e-26
624	ceRNA	TCERG1	25.0341	20.6887	0.275053	1.03392e-06	38	0.20156	6.95873e-08	2.78349e-06
625	ceRNA	TCF7L1	7.62163	24.0656	-1.6588	2.59786e-20	74	-0.67403	1.19156e-08	1.34646e-06
626	ceRNA	TCF7L2	9.97807	15.7258	-0.656302	3.17922e-13	87	-0.54294	5.87028e-11	7.16175e-09
627	ceRNA	TDG	17.9217	15.4195	0.216945	0.000161756	32	0.25809	1.1469e-07	3.78478e-06
628	ceRNA	TEX2	49.4408	37.9353	0.382162	1.97171e-05	51	0.30753	2.60847e-11	1.48683e-09
629	ceRNA	TGFA	2.29494	4.9374	-1.1053	7.81867e-06	15	-0.77775	8.15121e-07	1.54873e-05
630	ceRNA	TGFB2	4.89839	11.9219	-1.28324	2.75755e-10	55	-0.51091	5.4984e-20	3.18907e-18
631	ceRNA	TGFBR2	31.3002	40.9143	-0.386432	0.000324791	204	-0.35096	2.2047e-11	5.44561e-09
632	ceRNA	TIAL1	41.4477	36.498	0.183474	5.62649e-06	101	0.22069	6.85682e-17	7.40537e-15
633	ceRNA	TLE4	3.47388	5.82942	-0.746804	8.66376e-11	205	-0.66062	1.48938e-27	4.42346e-25
634	ceRNA	TLK2	18.0506	12.4276	0.5385	1.702e-09	45	0.22471	1.3114e-10	6.03242e-09
635	ceRNA	TMED7	75.971	63.6147	0.256089	6.64616e-05	56	0.25645	1.29794e-10	7.65783e-09
636	ceRNA	TMEFF1	2.05805	3.37098	-0.711892	0.0008188	187	-0.39772	1.58164e-18	3.90664e-16
637	ceRNA	TMEM100	1.42244	2.75058	-0.951372	4.41671e-07	71	-0.66628	3.87623e-20	3.48861e-18
638	ceRNA	TMEM123	106.462	184.517	-0.793415	4.47644e-12	32	-0.42904	2.53729e-07	8.37307e-06
639	ceRNA	TMEM133	2.29329	3.52461	-0.620047	1.03348e-08	15	-0.49138	4.61912e-07	7.8525e-06
640	ceRNA	TMEM161B	12.0831	8.57122	0.495422	1.71319e-10	171	0.29161	1.00509e-26	2.10064e-24
641	ceRNA	TMEM33	24.4922	19.422	0.334634	1.96721e-07	24	0.30711	7.39949e-09	2.07186e-07
642	ceRNA	TMEM47	7.06833	15.9264	-1.17198	3.50642e-12	46	-0.56326	4.60337e-11	2.99219e-09
643	ceRNA	TMEM9B	95.1786	83.426	0.190141	0.000738211	80	0.31224	7.04351e-07	7.8183e-05
644	ceRNA	TMPO	75.7549	51.9762	0.543489	1.78498e-11	34	0.25101	1.0315e-08	3.91972e-07
645	ceRNA	TNFRSF21	16.9392	28.2671	-0.738761	5.62103e-05	56	-0.70216	7.77325e-16	5.36354e-14
646	ceRNA	TNPO1	40.5225	34.2169	0.244015	0.000541863	666	0.16231	4.07941e-48	2.83519e-45
647	ceRNA	TNRC6C	9.25719	7.15728	0.371163	1.66271e-05	55	0.33292	2.12029e-10	1.39939e-08
648	ceRNA	TOB1	237.005	179.682	0.399472	2.38876e-07	18	0.42882	5.45841e-07	1.14627e-05
649	ceRNA	TOM1L1	76.1767	49.4678	0.622859	6.94261e-08	31	0.36499	1.52845e-08	6.26665e-07
650	ceRNA	TOP1	89.0159	73.1384	0.283435	7.10719e-08	119	0.25257	3.49497e-18	4.47356e-16
651	ceRNA	TOX	1.33762	1.60475	-0.262683	9.40018e-06	169	-0.55168	7.59422e-28	1.73908e-25
652	ceRNA	TP53BP1	28.9595	24.4257	0.245634	0.000474933	29	0.14737	6.69823e-07	1.94249e-05
653	ceRNA	TRA2B	63.4089	56.3646	0.169897	1.43976e-06	40	0.18157	2.03279e-06	8.13115e-05
654	ceRNA	TRAPPC8	19.774	16.2605	0.282239	6.83723e-05	223	0.21437	4.14415e-28	9.78018e-26
655	ceRNA	TRIM23	10.0054	7.52572	0.410875	2.10576e-08	114	0.27828	6.73112e-18	9.08701e-16
656	ceRNA	TRIM37	32.2259	20.9146	0.623707	1.32868e-12	227	0.22816	8.24017e-37	1.90348e-34
657	ceRNA	TRIM44	36.1898	28.6985	0.334608	1.05239e-05	79	0.19341	2.05717e-13	1.66631e-11
658	ceRNA	TRMT1L	17.0614	14.6188	0.222905	0.000316496	42	0.19156	1.17316e-09	4.92727e-08
659	ceRNA	TRPC3	0.108946	0.164435	-0.593898	0.000990082	28	-0.41885	3.03499e-09	9.40848e-08
660	ceRNA	TRPM7	25.2231	20.8143	0.277174	1.25734e-05	33	0.25698	2.40783e-08	8.42742e-07
661	ceRNA	TSC1	11.5953	9.78024	0.245605	7.5482e-05	62	0.18757	8.81596e-11	5.4659e-09
662	ceRNA	TSG101	118.443	94.4404	0.326718	5.21001e-08	56	0.29669	7.52564e-10	4.6659e-08
663	ceRNA	TSPAN18	11.1858	15.3908	-0.460396	5.64895e-06	20	-0.50357	9.89942e-09	2.17787e-07
664	ceRNA	TWF1	83.0348	69.9498	0.247396	0.000718136	209	0.2269	7.65676e-27	1.68449e-24
665	ceRNA	TXLNG	14.44	12.4162	0.21785	0.000813823	167	0.18683	7.00285e-19	1.25351e-16
666	ceRNA	U2SURP	38.4883	35.0096	0.136672	0.000400188	158	0.18918	9.54353e-23	1.52697e-20
667	ceRNA	UBE2D2	68.9015	60.7612	0.181385	2.83301e-07	75	0.24636	1.27275e-13	1.00547e-11
668	ceRNA	UBE2K	48.3896	36.1963	0.418853	4.97429e-09	241	0.23898	1.54272e-36	3.82593e-34
669	ceRNA	UBE2W	27.227	19.7048	0.466496	1.84612e-07	334	0.21861	1.68879e-41	5.94454e-39
670	ceRNA	UBFD1	44.9958	36.0167	0.321123	1.07528e-07	122	0.21801	2.26849e-20	2.92635e-18
671	ceRNA	UBN1	33.7328	28.4472	0.245867	3.38304e-05	39	0.2459	1.97762e-09	8.10823e-08
672	ceRNA	UBQLN1	91.2164	73.7783	0.306097	2.40668e-06	160	0.20557	1.23702e-21	2.00398e-19
673	ceRNA	UBR1	12.1632	9.44296	0.365208	7.54621e-06	147	0.18853	1.68596e-13	2.6301e-11
674	ceRNA	UBR5	79.2897	62.8501	0.335219	6.26538e-06	232	0.18894	1.93991e-31	4.5588e-29
675	ceRNA	UBXN2B	24.0102	18.404	0.383625	6.47108e-08	46	0.22359	5.40969e-08	2.48846e-06
676	ceRNA	UHMK1	35.9077	26.5002	0.438292	0.00016067	142	0.15808	2.99859e-14	4.34796e-12
677	ceRNA	UHRF1BP1L	16.6724	13.4228	0.312778	2.39665e-06	31	0.17793	1.60126e-07	5.12404e-06
678	ceRNA	ULK2	14.7693	10.2786	0.522953	2.9447e-06	63	0.23811	2.03608e-09	1.4049e-07
679	ceRNA	UNKL	11.9769	9.59008	0.320638	6.05903e-05	24	0.29503	2.95282e-06	7.38205e-05
680	ceRNA	USP13	9.47736	8.53447	0.151183	3.72123e-05	29	0.20994	6.85765e-07	1.98872e-05
681	ceRNA	USP14	61.0036	44.2747	0.462414	1.10693e-06	62	0.21568	2.76187e-13	1.71236e-11
682	ceRNA	USP32	45.1469	20.5911	1.13261	1.25068e-10	233	0.20665	2.50564e-22	6.13882e-20
683	ceRNA	USP37	9.89181	7.73416	0.35499	1.23636e-06	34	0.22105	3.11507e-07	1.12143e-05
684	ceRNA	USP38	20.9981	16.0564	0.387107	6.09347e-06	134	0.25166	1.48574e-23	2.03547e-21
685	ceRNA	USP46	8.4154	6.56282	0.358717	2.79168e-06	200	0.16964	2.25746e-26	4.56007e-24
686	ceRNA	USP6	0.796998	0.498415	0.677229	6.18849e-07	41	0.31882	6.27952e-10	2.6374e-08
687	ceRNA	USP8	25.479	20.844	0.289679	2.54988e-06	43	0.25426	4.53443e-08	2.08584e-06
688	ceRNA	VCL	71.5577	83.5827	-0.224097	0.000268956	70	-0.26471	1.16754e-11	9.2236e-10
689	ceRNA	VCPIP1	15.6077	12.0375	0.374728	2.59233e-06	150	0.18308	2.63654e-17	4.08664e-15
690	ceRNA	VEZF1	53.883	38.0784	0.500856	6.43276e-09	418	0.21793	1.52522e-41	6.93975e-39
691	ceRNA	VGLL3	1.85103	2.65492	-0.520335	0.000312417	28	-0.39464	1.67393e-08	5.69137e-07
692	ceRNA	VSNL1	1.46657	5.16687	-1.81684	3.02039e-16	43	-1.00687	1.15214e-09	7.94975e-08
693	ceRNA	WAPAL	35.8394	30.1958	0.2472	1.3067e-05	244	0.23275	1.81896e-28	4.94758e-26
694	ceRNA	WDFY3	21.6788	18.4228	0.234793	0.000675363	449	0.19571	9.92945e-33	4.73635e-30
695	ceRNA	WDR44	10.4664	9.18586	0.188275	0.000888508	277	0.18517	7.02393e-21	2.00884e-18
696	ceRNA	WDR7	8.82064	7.02379	0.328633	2.59233e-06	88	0.22896	3.59616e-16	3.34443e-14
697	ceRNA	WHSC1	37.9696	26.4184	0.523304	6.09163e-12	62	0.24815	1.75952e-12	1.1085e-10
698	ceRNA	WHSC1L1	63.2886	39.2371	0.68973	6.86144e-05	78	0.21689	3.7506e-09	3.22551e-07
699	ceRNA	WIF1	0.20295	9.19092	-5.50101	1.5949e-10	26	-0.96743	1.05319e-09	3.68616e-08
700	ceRNA	WWP1	158.418	86.7717	0.868444	5.00623e-13	166	0.32801	2.93462e-09	7.89414e-07
701	ceRNA	XIAP	20.19	17.2652	0.225776	0.000258589	66	0.16429	4.87736e-12	3.21905e-10
702	ceRNA	XPO1	129.718	114.32	0.182309	2.13413e-06	214	0.20235	2.05241e-22	4.76158e-20
703	ceRNA	YAF2	6.97023	5.84561	0.253853	3.35832e-05	51	0.23166	6.90745e-14	3.59187e-12
704	ceRNA	YPEL4	0.478386	0.773575	-0.693366	6.36819e-09	27	-0.64067	2.16814e-09	6.93805e-08
705	ceRNA	YTHDC1	27.3585	24.0536	0.185739	2.84439e-05	130	0.22161	1.031e-18	1.40217e-16
706	ceRNA	YWHAG	143.381	117.542	0.28667	5.72252e-05	35	0.27651	3.91762e-07	1.72375e-05
707	ceRNA	ZBTB11	15.4627	12.5781	0.297874	6.72124e-07	127	0.22152	1.10868e-19	1.47454e-17
708	ceRNA	ZBTB41	17.9944	14.633	0.298319	0.000184416	285	0.18075	5.87458e-36	1.69775e-33
709	ceRNA	ZBTB6	10.7555	8.8905	0.274732	5.86743e-05	92	0.2101	3.82871e-16	3.5607e-14
710	ceRNA	ZC3H12C	1.05972	1.55073	-0.549266	9.00467e-06	174	-0.21467	4.82181e-09	9.06501e-07
711	ceRNA	ZC3H7A	34.1579	29.8001	0.196903	1.70106e-05	25	0.24189	4.06452e-07	1.01613e-05
712	ceRNA	ZCCHC2	13.4587	10.5461	0.351836	9.61395e-07	119	0.20813	5.13288e-21	6.21078e-19
713	ceRNA	ZCCHC8	23.8202	19.1504	0.314814	3.9903e-07	34	0.27536	1.42917e-08	5.00211e-07
714	ceRNA	ZDHHC17	13.2453	10.8223	0.291479	0.00017303	335	0.21857	8.26207e-22	3.28004e-19
715	ceRNA	ZDHHC23	5.53502	4.24828	0.381712	8.1553e-05	32	0.20507	2.50344e-06	8.51169e-05
716	ceRNA	ZFAND3	54.8319	50.0258	0.132343	0.000598662	29	0.29014	9.40254e-07	3.10284e-05
717	ceRNA	ZFC3H1	12.773	9.04089	0.498559	1.09138e-08	94	0.20542	5.26392e-17	4.94808e-15
718	ceRNA	ZFHX3	7.42868	5.44673	0.447715	2.14299e-06	365	0.20198	9.34914e-25	3.65552e-22
719	ceRNA	ZFP36L2	67.2146	102.435	-0.607855	3.28086e-11	59	-0.47118	7.12222e-15	5.05677e-13
720	ceRNA	ZFP91	43.9496	38.5705	0.188351	0.000926812	265	0.18616	3.93864e-29	1.11858e-26
721	ceRNA	ZFYVE16	22.4857	18.4607	0.284551	8.16428e-06	128	0.27502	9.24048e-13	1.42303e-10
722	ceRNA	ZNF217	64.9638	49.6799	0.386973	1.45813e-06	265	0.21814	2.2656e-32	6.34368e-30
723	ceRNA	ZNF236	4.66754	3.74595	0.317332	2.00916e-05	255	0.1985	6.09331e-44	1.56598e-41
724	ceRNA	ZNF281	23.8906	18.3763	0.378598	2.31746e-05	78	0.15078	2.39842e-07	2.1346e-05
725	ceRNA	ZNF318	11.1206	9.8903	0.169148	0.000796696	136	0.15239	1.10835e-19	1.50735e-17
726	ceRNA	ZNF367	9.18687	5.30147	0.793181	1.86504e-13	284	0.24688	1.62757e-32	5.15939e-30
727	ceRNA	ZNF469	2.25167	4.0438	-0.844712	1.58675e-08	16	-0.51251	1.15666e-07	2.08199e-06
728	ceRNA	ZNF503	3.86399	5.77212	-0.57901	1.14177e-07	15	-0.57706	6.3404e-08	1.01446e-06
729	ceRNA	ZNF516	8.60279	6.01363	0.51657	4.047e-05	44	0.30403	1.45991e-08	8.17551e-07
730	ceRNA	ZNF532	17.7573	24.0809	-0.439475	6.69218e-07	100	-0.45015	2.6834e-17	3.51525e-15
731	ceRNA	ZNF609	20.7184	16.143	0.360004	2.07284e-06	79	0.20877	4.29625e-11	3.437e-09
732	ceRNA	ZNFX1	33.6659	27.402	0.297007	0.000236613	75	0.17413	1.9778e-10	1.48335e-08
733	ceRNA	ZNRF3	6.97672	5.17264	0.431649	3.91819e-08	50	0.25123	5.46592e-11	2.73296e-09
734	ceRNA	ZSWIM6	8.04398	6.23634	0.367211	0.000164508	187	0.23068	1.55355e-12	3.55763e-10
