# Supplementary material for: Cupid: simultaneous reconstruction of microRNA-target and ceRNA networks
Source: HighWire-hosted journal article supplement (doi:10.1101/gr.178194.114), 2014-11-05
Supplement: Table_S12.xlsx [file Table_S12.xlsx]

## Sheet: Pathway
	A list of 2,336 human pathway gene sets were compiled from the following 17 databases. Pathways were integrated in a complementary manner and redundancies were avoided by ConsensusPathDB-human Release 18 (April 10th, 2011) at http://cpdb.molgen.mpg.de/. Only the pathways with at least 5 genes were kept for our analysis. We tested all these pathways for 1,189 miRNA and 4,887 ceRNA regulators and r…
	No.	Database	Version	Number of pathways	Web site
	1	BioCarta	05/12/2009	236	http://www.biocarta.com/
	2	CancerCellMap	04/25/2011	10	http://cancer.cellmap.org/cellmap/
	3	EHMN	04/10/2011	61	http://www.ehmn.bioinformatics.ed.ac.uk/
	4	HumanCyc	15.0	130	http://humancyc.org/
	5	INOH	04/10/2011	90	http://www.inoh.org/
	6	KEGG	58.0	224	http://www.genome.jp/kegg/
	7	NetPath	04/10/2011	20	http://www.netpath.org/
	8	PharmGKB	04/11/2011	59	http://www.pharmgkb.org/
	9	PID	03/08/2011	189	http://pid.nci.nih.gov/
	10	Reactome	36	864	http://www.reactome.org/
	11	SA	09/09/2010	10	http://www.sigmaaldrich.com/
	12	SIG	09/09/2010	8	http://www.signaling-gateway.org/
	13	SignaLink	04/11/2011	8	http://signalink.org/
	14	SMPDB	04/11/2011	127	http://www.smpdb.ca/
	15	STKE	09/09/2010	28	http://stke.sciencemag.org/
	16	SuperArray	09/09/2010	1	http://www.sabiosciences.com/
	17	WikiPathways	04/11/2011	271	http://www.wikipathways.org/
	Total			2336

## Sheet: Regulator
miRNA	ceRNA
hsa-let-7a-2-3p	AAK1
hsa-let-7a-3p	ABCA1
hsa-let-7a-5p	ABCB10
hsa-let-7b-3p	ABCC10
hsa-let-7b-5p	ABCC4
hsa-let-7c	ABCC5
hsa-let-7d-3p	ABCD3
hsa-let-7d-5p	ABCE1
hsa-let-7e-3p	ABCF2
hsa-let-7e-5p	ABCF3
hsa-let-7f-1-3p	ABHD13
hsa-let-7f-2-3p	ABHD2
hsa-let-7f-5p	ABHD3
hsa-let-7g-3p	ABI1
hsa-let-7g-5p	ABI2
hsa-let-7i-3p	ABI3BP
hsa-let-7i-5p	ABL1
hsa-miR-1	ABL2
hsa-miR-100-3p	ABLIM3
hsa-miR-100-5p	ABTB2
hsa-miR-101-3p	ACACA
hsa-miR-101-5p	ACAP2
hsa-miR-103a-2-5p	ACBD3
hsa-miR-103a-3p	ACBD5
hsa-miR-103b	ACER2
hsa-miR-105-3p	ACIN1
hsa-miR-105-5p	ACPL2
hsa-miR-106a-3p	ACSL1
hsa-miR-106a-5p	ACSL3
hsa-miR-106b-3p	ACSL4
hsa-miR-106b-5p	ACSL5
hsa-miR-107	ACSL6
hsa-miR-10a-3p	ACTA2
hsa-miR-10a-5p	ACTB
hsa-miR-10b-3p	ACTL6A
hsa-miR-10b-5p	ACTN1
hsa-miR-1178	ACTN4
hsa-miR-1179	ACTR1A
hsa-miR-1180	ACTR2
hsa-miR-1182	ACTR3
hsa-miR-1183	ACTR3B
hsa-miR-1184	ACVR1
hsa-miR-1185-5p	ACVR1B
hsa-miR-1193	ACVR1C
hsa-miR-1197	ACVR2A
hsa-miR-1200	ACVR2B
hsa-miR-1202	ADAM10
hsa-miR-1203	ADAM12
hsa-miR-1204	ADAM17
hsa-miR-1205	ADAM19
hsa-miR-1206	ADAM22
hsa-miR-1207-3p	ADAM23
hsa-miR-1207-5p	ADAM9
hsa-miR-1208	ADAMTS10
hsa-miR-122-3p	ADAMTS15
hsa-miR-122-5p	ADAMTS18
hsa-miR-1224-3p	ADAMTS19
hsa-miR-1224-5p	ADAMTS3
hsa-miR-1225-3p	ADAMTS5
hsa-miR-1225-5p	ADAMTS6
hsa-miR-1226-3p	ADAMTS7
hsa-miR-1226-5p	ADAMTS9
hsa-miR-1227	ADAMTSL1
hsa-miR-1228-3p	ADAMTSL3
hsa-miR-1229	ADCY2
hsa-miR-1231	ADCY3
hsa-miR-1233	ADCY6
hsa-miR-1234	ADCY9
hsa-miR-1236	ADCYAP1
hsa-miR-1237	ADD1
hsa-miR-1238	ADD3
hsa-miR-124-3p	ADIPOR1
hsa-miR-124-5p	ADIPOR2
hsa-miR-1243	ADK
hsa-miR-1244	ADM
hsa-miR-1245a	ADNP
hsa-miR-1246	ADO
hsa-miR-1247-5p	ADORA2A
hsa-miR-1248	ADRA1D
hsa-miR-1249	ADRA2A
hsa-miR-1250	ADRB1
hsa-miR-1251	ADRB2
hsa-miR-1252	ADRBK1
hsa-miR-1253	ADSS
hsa-miR-1254	AEBP2
hsa-miR-1255a	AFAP1L2
hsa-miR-1255b-5p	AFF1
hsa-miR-1256	AFF2
hsa-miR-1257	AFF3
hsa-miR-1258	AFF4
hsa-miR-125a-3p	AFG3L2
hsa-miR-125a-5p	AFTPH
hsa-miR-125b-1-3p	AGAP1
hsa-miR-125b-2-3p	AGAP2
hsa-miR-125b-5p	AGFG1
hsa-miR-126-3p	AGGF1
hsa-miR-126-5p	AGPAT9
hsa-miR-1260a	AGPS
hsa-miR-1260b	AGTPBP1
hsa-miR-1261	AHCTF1
hsa-miR-1262	AHCYL1
hsa-miR-1263	AHCYL2
hsa-miR-1264	AHNAK
hsa-miR-1265	AHR
hsa-miR-1266	AJUBA
hsa-miR-1267	AKAP1
hsa-miR-1269a	AKAP11
hsa-miR-127-3p	AKAP12
hsa-miR-127-5p	AKAP13
hsa-miR-1270	AKAP5
hsa-miR-1271-5p	AKAP6
hsa-miR-1272	AKAP7
hsa-miR-1273a	AKAP9
hsa-miR-1273c	AKIRIN1
hsa-miR-1273d	AKIRIN2
hsa-miR-1273e	AKNA
hsa-miR-1275	AKT3
hsa-miR-1276	AKTIP
hsa-miR-1277-3p	ALCAM
hsa-miR-1278	ALDH1A3
hsa-miR-1279	ALG10
hsa-miR-128	ALG9
hsa-miR-1280	ALS2
hsa-miR-1282	ALS2CR8
hsa-miR-1283	ALX4
hsa-miR-1284	AMBRA1
hsa-miR-1285-3p	AMD1
hsa-miR-1286	AMFR
hsa-miR-1287	AMMECR1
hsa-miR-1288	AMMECR1L
hsa-miR-1289	AMOTL2
hsa-miR-129-1-3p	AMPH
hsa-miR-129-2-3p	AMT
hsa-miR-129-5p	ANAPC1
hsa-miR-1290	ANGEL1
hsa-miR-1291	ANGPTL2
hsa-miR-1292	ANK1
hsa-miR-1293	ANK2
hsa-miR-1294	ANK3
hsa-miR-1295a	ANKFY1
hsa-miR-1296	ANKH
hsa-miR-1297	ANKHD1
hsa-miR-1298	ANKIB1
hsa-miR-1299	ANKRA2
hsa-miR-1301	ANKRD1
hsa-miR-1302	ANKRD10
hsa-miR-1303	ANKRD11
hsa-miR-1304-5p	ANKRD12
hsa-miR-1305	ANKRD13C
hsa-miR-1306-3p	ANKRD17
hsa-miR-1307-3p	ANKRD28
hsa-miR-130a-3p	ANKRD29
hsa-miR-130a-5p	ANKRD40
hsa-miR-130b-3p	ANKRD44
hsa-miR-130b-5p	ANKRD46
hsa-miR-132-3p	ANKRD49
hsa-miR-132-5p	ANKRD50
hsa-miR-1321	ANKRD52
hsa-miR-1322	ANKS1A
hsa-miR-1323	ANKS1B
hsa-miR-1324	ANLN
hsa-miR-133a	ANO1
hsa-miR-133b	ANO3
hsa-miR-134	ANO4
hsa-miR-135a-3p	ANO6
hsa-miR-135a-5p	ANO8
hsa-miR-135b-3p	ANP32A
hsa-miR-135b-5p	ANP32B
hsa-miR-136-3p	ANP32E
hsa-miR-136-5p	ANTXR1
hsa-miR-137	ANTXR2
hsa-miR-138-1-3p	AP1AR
hsa-miR-138-2-3p	AP1G1
hsa-miR-138-5p	AP1S1
hsa-miR-139-3p	AP2B1
hsa-miR-139-5p	AP3B1
hsa-miR-140-3p	AP3D1
hsa-miR-140-5p	AP3M1
hsa-miR-141-3p	AP3S1
hsa-miR-141-5p	AP4E1
hsa-miR-142-3p	APAF1
hsa-miR-142-5p	APBA1
hsa-miR-143-3p	APBB2
hsa-miR-143-5p	APBB3
hsa-miR-144-3p	APC
hsa-miR-144-5p	APCDD1
hsa-miR-145-3p	API5
hsa-miR-145-5p	APP
hsa-miR-1468	APPBP2
hsa-miR-146a-3p	APPL1
hsa-miR-146a-5p	APPL2
hsa-miR-146b-3p	AQP11
hsa-miR-146b-5p	AR
hsa-miR-1470	ARAP2
hsa-miR-147a	ARCN1
hsa-miR-147b	ARF3
hsa-miR-148a-3p	ARF4
hsa-miR-148a-5p	ARF6
hsa-miR-148b-3p	ARFGEF1
hsa-miR-148b-5p	ARFGEF2
hsa-miR-149-3p	ARFIP1
hsa-miR-149-5p	ARG2
hsa-miR-150-3p	ARGLU1
hsa-miR-150-5p	ARHGAP1
hsa-miR-151a-3p	ARHGAP11A
hsa-miR-151a-5p	ARHGAP12
hsa-miR-152	ARHGAP15
hsa-miR-153	ARHGAP18
hsa-miR-1537	ARHGAP19
hsa-miR-1539	ARHGAP20
hsa-miR-154-3p	ARHGAP21
hsa-miR-154-5p	ARHGAP23
hsa-miR-155-3p	ARHGAP24
hsa-miR-155-5p	ARHGAP26
hsa-miR-15a-3p	ARHGAP28
hsa-miR-15a-5p	ARHGAP29
hsa-miR-15b-3p	ARHGAP31
hsa-miR-15b-5p	ARHGAP32
hsa-miR-16-1-3p	ARHGAP35
hsa-miR-16-2-3p	ARHGAP5
hsa-miR-16-5p	ARHGAP6
hsa-miR-17-3p	ARHGEF10
hsa-miR-17-5p	ARHGEF11
hsa-miR-181a-2-3p	ARHGEF12
hsa-miR-181a-3p	ARHGEF15
hsa-miR-181a-5p	ARHGEF17
hsa-miR-181b-5p	ARHGEF18
hsa-miR-181c-3p	ARHGEF3
hsa-miR-181c-5p	ARHGEF4
hsa-miR-181d	ARHGEF7
hsa-miR-182-3p	ARHGEF9
hsa-miR-182-5p	ARID1A
hsa-miR-1825	ARID1B
hsa-miR-1827	ARID2
hsa-miR-183-3p	ARID3A
hsa-miR-183-5p	ARID3B
hsa-miR-184	ARID4A
hsa-miR-185-3p	ARID4B
hsa-miR-185-5p	ARID5B
hsa-miR-186-3p	ARIH1
hsa-miR-186-5p	ARL1
hsa-miR-187-3p	ARL13B
hsa-miR-187-5p	ARL15
hsa-miR-188-3p	ARL3
hsa-miR-188-5p	ARL4A
hsa-miR-18a-3p	ARL4C
hsa-miR-18a-5p	ARL5A
hsa-miR-18b-3p	ARL5B
hsa-miR-18b-5p	ARL6IP1
hsa-miR-1908	ARL6IP6
hsa-miR-1909-3p	ARL8B
hsa-miR-1909-5p	ARMC1
hsa-miR-190a	ARMC5
hsa-miR-190b	ARMC8
hsa-miR-191-3p	ARMCX2
hsa-miR-191-5p	ARNT
hsa-miR-1910	ARNTL
hsa-miR-1911-3p	ARPC2
hsa-miR-1911-5p	ARPC5
hsa-miR-1912	ARPP19
hsa-miR-1913	ARRDC3
hsa-miR-1914-3p	ARRDC4
hsa-miR-1914-5p	ARSB
hsa-miR-1915-3p	ARSJ
hsa-miR-1915-5p	ART3
hsa-miR-192-3p	ARX
hsa-miR-192-5p	ASAP1
hsa-miR-193a-3p	ASAP2
hsa-miR-193a-5p	ASB14
hsa-miR-193b-3p	ASB7
hsa-miR-193b-5p	ASCC3
hsa-miR-194-3p	ASCL1
hsa-miR-194-5p	ASF1A
hsa-miR-195-3p	ASH1L
hsa-miR-195-5p	ASIC1
hsa-miR-196a-3p	ASPH
hsa-miR-196a-5p	ASPN
hsa-miR-196b-3p	ASUN
hsa-miR-196b-5p	ASXL1
hsa-miR-197-3p	ASXL2
hsa-miR-1972	ATAD1
hsa-miR-1973	ATAD2
hsa-miR-1976	ATAD2B
hsa-miR-198	ATAD5
hsa-miR-199a-3p	ATF1
hsa-miR-199a-5p	ATF2
hsa-miR-199b-3p	ATF6B
hsa-miR-199b-5p	ATF7
hsa-miR-19a-3p	ATF7IP
hsa-miR-19a-5p	ATG14
hsa-miR-19b-1-5p	ATG16L1
hsa-miR-19b-2-5p	ATG2A
hsa-miR-19b-3p	ATG2B
hsa-miR-200a-3p	ATG5
hsa-miR-200a-5p	ATG7
hsa-miR-200b-3p	ATG9A
hsa-miR-200b-5p	ATL1
hsa-miR-200c-3p	ATL2
hsa-miR-200c-5p	ATL3
hsa-miR-202-3p	ATMIN
hsa-miR-202-5p	ATP10A
hsa-miR-203	ATP11A
hsa-miR-204-5p	ATP11B
hsa-miR-205-3p	ATP11C
hsa-miR-205-5p	ATP13A3
hsa-miR-2052	ATP1B1
hsa-miR-2053	ATP2A2
hsa-miR-2054	ATP2B1
hsa-miR-206	ATP2B2
hsa-miR-208a	ATP2B4
hsa-miR-208b	ATP2C1
hsa-miR-20a-3p	ATP6V0A2
hsa-miR-20a-5p	ATP6V0E1
hsa-miR-20b-3p	ATP6V1A
hsa-miR-20b-5p	ATP6V1B2
hsa-miR-21-3p	ATP7A
hsa-miR-21-5p	ATP8A1
hsa-miR-210	ATP8B1
hsa-miR-211-5p	ATP8B2
hsa-miR-2110	ATP8B4
hsa-miR-2113	ATPBD4
hsa-miR-2114-3p	ATRN
hsa-miR-2114-5p	ATRNL1
hsa-miR-2115-3p	ATRX
hsa-miR-2115-5p	ATXN1
hsa-miR-2116-3p	ATXN1L
hsa-miR-2116-5p	ATXN2
hsa-miR-2117	ATXN2L
hsa-miR-212-3p	ATXN3
hsa-miR-214-3p	ATXN7
hsa-miR-214-5p	ATXN7L1
hsa-miR-215	ATXN7L3
hsa-miR-216a	ATXN7L3B
hsa-miR-216b	AUH
hsa-miR-217	AURKB
hsa-miR-218-1-3p	AUTS2
hsa-miR-218-2-3p	AVL9
hsa-miR-218-5p	AXIN2
hsa-miR-219-1-3p	AXL
hsa-miR-219-2-3p	AZI2
hsa-miR-219-5p	AZIN1
hsa-miR-22-3p	B3GALT1
hsa-miR-22-5p	B3GALT2
hsa-miR-221-3p	B3GNT2
hsa-miR-221-5p	B3GNT5
hsa-miR-222-3p	B4GALT1
hsa-miR-222-5p	B4GALT3
hsa-miR-223-3p	B4GALT5
hsa-miR-223-5p	B4GALT6
hsa-miR-224-3p	BACE1
hsa-miR-224-5p	BACE2
hsa-miR-2276	BACH1
hsa-miR-2277-3p	BACH2
hsa-miR-2278	BAG4
hsa-miR-2355-3p	BAG5
hsa-miR-2355-5p	BAHD1
hsa-miR-23a-3p	BAI3
hsa-miR-23a-5p	BASP1
hsa-miR-23b-3p	BAZ1A
hsa-miR-23b-5p	BAZ1B
hsa-miR-23c	BAZ2A
hsa-miR-24-1-5p	BAZ2B
hsa-miR-24-2-5p	BBX
hsa-miR-24-3p	BCAR3
hsa-miR-25-3p	BCAS1
hsa-miR-25-5p	BCAT1
hsa-miR-26a-1-3p	BCL11A
hsa-miR-26a-2-3p	BCL11B
hsa-miR-26a-5p	BCL2
hsa-miR-26b-3p	BCL2L1
hsa-miR-26b-5p	BCL2L11
hsa-miR-27a-3p	BCL2L2
hsa-miR-27a-5p	BCL6
hsa-miR-27b-3p	BCL7A
hsa-miR-27b-5p	BCL9
hsa-miR-28-3p	BCL9L
hsa-miR-28-5p	BCLAF1
hsa-miR-2909	BCOR
hsa-miR-296-3p	BCORL1
hsa-miR-296-5p	BDNF
hsa-miR-297	BDP1
hsa-miR-298	BEAN1
hsa-miR-299-3p	BECN1
hsa-miR-299-5p	BEND3
hsa-miR-29a-3p	BEND4
hsa-miR-29a-5p	BEND6
hsa-miR-29b-1-5p	BEND7
hsa-miR-29b-2-5p	BET1
hsa-miR-29b-3p	BFAR
hsa-miR-29c-3p	BHLHE22
hsa-miR-29c-5p	BHLHE40
hsa-miR-300	BHLHE41
hsa-miR-301a-3p	BICC1
hsa-miR-301b	BICD1
hsa-miR-302a-3p	BICD2
hsa-miR-302a-5p	BIRC6
hsa-miR-302b-3p	BIVM
hsa-miR-302b-5p	BLCAP
hsa-miR-302c-3p	BLMH
hsa-miR-302c-5p	BMI1
hsa-miR-302d-3p	BMP1
hsa-miR-302d-5p	BMP2
hsa-miR-302e	BMP2K
hsa-miR-302f	BMP4
hsa-miR-3065-3p	BMP5
hsa-miR-3065-5p	BMP6
hsa-miR-3074-3p	BMPER
hsa-miR-30a-3p	BMPR1A
hsa-miR-30a-5p	BMPR1B
hsa-miR-30b-3p	BMPR2
hsa-miR-30b-5p	BNC1
hsa-miR-30c-1-3p	BNC2
hsa-miR-30c-2-3p	BNIP2
hsa-miR-30c-5p	BNIP3L
hsa-miR-30d-3p	BOC
hsa-miR-30d-5p	BOD1L1
hsa-miR-30e-3p	BPTF
hsa-miR-30e-5p	BRAP
hsa-miR-31-3p	BRD1
hsa-miR-31-5p	BRD3
hsa-miR-3115	BRD4
hsa-miR-3116	BRD7
hsa-miR-3117-3p	BRD8
hsa-miR-3118	BRMS1L
hsa-miR-3119	BRPF1
hsa-miR-3120-3p	BRPF3
hsa-miR-3121-3p	BRWD1
hsa-miR-3122	BRWD3
hsa-miR-3123	BSDC1
hsa-miR-3125	BSN
hsa-miR-3126-3p	BTAF1
hsa-miR-3126-5p	BTBD1
hsa-miR-3127-5p	BTBD10
hsa-miR-3128	BTBD11
hsa-miR-3129-5p	BTBD3
hsa-miR-3130-3p	BTBD7
hsa-miR-3130-5p	BTF3
hsa-miR-3132	BTF3L4
hsa-miR-3133	BTG2
hsa-miR-3134	BTG3
hsa-miR-3135a	BTLA
hsa-miR-3136-5p	BTRC
hsa-miR-3137	BUB3
hsa-miR-3138	BZRAP1
hsa-miR-3139	BZW1
hsa-miR-3140-3p	C10orf114
hsa-miR-3141	C10orf118
hsa-miR-3142	C10orf12
hsa-miR-3143	C10orf76
hsa-miR-3144-3p	C11orf30
hsa-miR-3144-5p	C11orf41
hsa-miR-3145-3p	C11orf42
hsa-miR-3146	C11orf49
hsa-miR-3147	C11orf57
hsa-miR-3148	C11orf58
hsa-miR-3149	C11orf75
hsa-miR-3150a-3p	C11orf82
hsa-miR-3150b-3p	C11orf84
hsa-miR-3151	C11orf87
hsa-miR-3152-3p	C11orf95
hsa-miR-3153	C12orf23
hsa-miR-3154	C12orf29
hsa-miR-3155a	C12orf51
hsa-miR-3156-5p	C12orf68
hsa-miR-3157-5p	C12orf76
hsa-miR-3158-3p	C14orf101
hsa-miR-3159	C14orf102
hsa-miR-3160-3p	C14orf129
hsa-miR-3161	C14orf135
hsa-miR-3162-5p	C14orf28
hsa-miR-3163	C14orf37
hsa-miR-3164	C15orf29
hsa-miR-3165	C15orf41
hsa-miR-3166	C15orf44
hsa-miR-3167	C16orf52
hsa-miR-3168	C16orf70
hsa-miR-3169	C16orf72
hsa-miR-3170	C16orf87
hsa-miR-3171	C17orf104
hsa-miR-3173-3p	C17orf39
hsa-miR-3174	C17orf59
hsa-miR-3175	C17orf85
hsa-miR-3176	C18orf1
hsa-miR-3177-3p	C18orf25
hsa-miR-3179	C18orf34
hsa-miR-3180	C18orf8
hsa-miR-3180-5p	C19orf43
hsa-miR-3181	C19orf6
hsa-miR-3182	C1GALT1
hsa-miR-3183	C1orf144
hsa-miR-3184-5p	C1orf173
hsa-miR-3185	C1orf21
hsa-miR-3186-5p	C1orf52
hsa-miR-3187-3p	C1orf56
hsa-miR-3188	C1orf63
hsa-miR-3189-3p	C1QBP
hsa-miR-3190-5p	C1S
hsa-miR-3191-3p	C20orf111
hsa-miR-3192	C20orf112
hsa-miR-3193	C20orf194
hsa-miR-3194-5p	C20orf20
hsa-miR-3196	C21orf91
hsa-miR-3198	C2orf42
hsa-miR-3199	C2orf44
hsa-miR-32-3p	C2orf47
hsa-miR-32-5p	C2orf69
hsa-miR-3200-3p	C3orf18
hsa-miR-3200-5p	C3orf38
hsa-miR-3201	C3orf58
hsa-miR-3202	C3orf70
hsa-miR-320a	C4orf32
hsa-miR-320b	C4orf34
hsa-miR-320c	C5orf15
hsa-miR-320d	C5orf24
hsa-miR-320e	C5orf30
hsa-miR-323a-3p	C5orf44
hsa-miR-323a-5p	C5orf51
hsa-miR-323b-3p	C5orf62
hsa-miR-323b-5p	C5orf63
hsa-miR-324-3p	C6orf106
hsa-miR-324-5p	C6orf120
hsa-miR-325	C6orf211
hsa-miR-326	C6orf228
hsa-miR-328	C6orf62
hsa-miR-329	C7orf43
hsa-miR-330-3p	C7orf60
hsa-miR-330-5p	C8orf34
hsa-miR-331-3p	C8orf4
hsa-miR-331-5p	C8orf58
hsa-miR-335-3p	C9orf100
hsa-miR-335-5p	C9orf3
hsa-miR-337-3p	C9orf69
hsa-miR-337-5p	C9orf72
hsa-miR-338-3p	CAAP1
hsa-miR-338-5p	CAB39
hsa-miR-339-3p	CACHD1
hsa-miR-339-5p	CACNA1A
hsa-miR-33a-3p	CACNA1C
hsa-miR-33a-5p	CACNA1D
hsa-miR-33b-3p	CACNA1E
hsa-miR-33b-5p	CACNA1H
hsa-miR-340-3p	CACNA2D1
hsa-miR-340-5p	CACNA2D2
hsa-miR-342-3p	CACNA2D3
hsa-miR-342-5p	CACNB1
hsa-miR-345-5p	CACNB2
hsa-miR-346	CACNB4
hsa-miR-34a-3p	CACUL1
hsa-miR-34a-5p	CADM1
hsa-miR-34b-3p	CADM2
hsa-miR-34b-5p	CALB2
hsa-miR-34c-3p	CALCR
hsa-miR-34c-5p	CALD1
hsa-miR-3605-5p	CALM1
hsa-miR-3606	CALM2
hsa-miR-3607-3p	CALM3
hsa-miR-3607-5p	CALML4
hsa-miR-3609	CALU
hsa-miR-361-3p	CAMK2A
hsa-miR-361-5p	CAMK2G
hsa-miR-3610	CAMK2N1
hsa-miR-3611	CAMKK2
hsa-miR-3612	CAMLG
hsa-miR-3613-3p	CAMSAP1
hsa-miR-3613-5p	CAMSAP2
hsa-miR-3614-3p	CAMTA1
hsa-miR-3614-5p	CAMTA2
hsa-miR-3615	CAND1
hsa-miR-3616-3p	CANX
hsa-miR-3616-5p	CAP1
hsa-miR-3617	CAPN6
hsa-miR-3618	CAPN7
hsa-miR-3619-5p	CAPRIN1
hsa-miR-362-3p	CAPRIN2
hsa-miR-362-5p	CAPZA1
hsa-miR-3620	CAPZA2
hsa-miR-3622a-3p	CARM1
hsa-miR-3622a-5p	CASC3
hsa-miR-3622b-3p	CASC4
hsa-miR-3622b-5p	CASD1
hsa-miR-363-3p	CASK
hsa-miR-363-5p	CASP3
hsa-miR-3646	CASP8AP2
hsa-miR-3649	CAST
hsa-miR-3650	CASZ1
hsa-miR-3651	CAV1
hsa-miR-3652	CAV2
hsa-miR-3653	CBFA2T2
hsa-miR-3654	CBFA2T3
hsa-miR-3655	CBFB
hsa-miR-3657	CBL
hsa-miR-3658	CBLB
hsa-miR-3659	CBLL1
hsa-miR-365a-3p	CBLN4
hsa-miR-365a-5p	CBX1
hsa-miR-3660	CBX3
hsa-miR-3661	CBX4
hsa-miR-3662	CBX5
hsa-miR-3663-3p	CBX7
hsa-miR-3663-5p	CC2D1A
hsa-miR-3664-5p	CCAR1
hsa-miR-3665	CCDC117
hsa-miR-3666	CCDC126
hsa-miR-3667-3p	CCDC148
hsa-miR-3667-5p	CCDC19
hsa-miR-3668	CCDC25
hsa-miR-3669	CCDC47
hsa-miR-367-3p	CCDC50
hsa-miR-367-5p	CCDC6
hsa-miR-3670	CCDC64
hsa-miR-3671	CCDC71L
hsa-miR-3672	CCDC82
hsa-miR-3673	CCDC85A
hsa-miR-3674	CCDC88A
hsa-miR-3675-3p	CCNA2
hsa-miR-3675-5p	CCNC
hsa-miR-3676-3p	CCND1
hsa-miR-3677-3p	CCND2
hsa-miR-3678-3p	CCNE1
hsa-miR-3678-5p	CCNE2
hsa-miR-3679-3p	CCNG1
hsa-miR-3679-5p	CCNG2
hsa-miR-3680-3p	CCNJ
hsa-miR-3680-5p	CCNJL
hsa-miR-3681-3p	CCNK
hsa-miR-3681-5p	CCNL1
hsa-miR-3682-3p	CCNL2
hsa-miR-3683	CCNT2
hsa-miR-3684	CCNY
hsa-miR-3685	CCNYL1
hsa-miR-3686	CCP110
hsa-miR-3687	CCPG1
hsa-miR-3688-3p	CCR7
hsa-miR-3689a-3p	CCSAP
hsa-miR-3689a-5p	CCT6A
hsa-miR-3689b-3p	CD163
hsa-miR-3689b-5p	CD164
hsa-miR-369-3p	CD200R1
hsa-miR-369-5p	CD2AP
hsa-miR-3690	CD34
hsa-miR-3691-5p	CD47
hsa-miR-3692-3p	CD69
hsa-miR-3692-5p	CDADC1
hsa-miR-370	CDC14A
hsa-miR-3713	CDC14B
hsa-miR-3714	CDC23
hsa-miR-371a-3p	CDC25A
hsa-miR-371a-5p	CDC25B
hsa-miR-372	CDC27
hsa-miR-373-3p	CDC34
hsa-miR-373-5p	CDC37L1
hsa-miR-374a-3p	CDC40
hsa-miR-374a-5p	CDC42
hsa-miR-374b-3p	CDC42BPA
hsa-miR-374b-5p	CDC42BPB
hsa-miR-374c-5p	CDC42SE1
hsa-miR-375	CDC42SE2
hsa-miR-376a-3p	CDC5L
hsa-miR-376a-5p	CDC73
hsa-miR-376b	CDCA4
hsa-miR-376c	CDCA7
hsa-miR-377-3p	CDCA8
hsa-miR-377-5p	CDH11
hsa-miR-378a-3p	CDH13
hsa-miR-378a-5p	CDH2
hsa-miR-378b	CDH22
hsa-miR-378c	CDH24
hsa-miR-379-3p	CDH4
hsa-miR-379-5p	CDH6
hsa-miR-380-3p	CDK1
hsa-miR-380-5p	CDK12
hsa-miR-381	CDK13
hsa-miR-382-5p	CDK14
hsa-miR-383	CDK17
hsa-miR-384	CDK19
hsa-miR-3907	CDK2
hsa-miR-3908	CDK2AP1
hsa-miR-3909	CDK5R1
hsa-miR-3910	CDK6
hsa-miR-3911	CDK8
hsa-miR-3912	CDKN1B
hsa-miR-3913-5p	CDKN1C
hsa-miR-3914	CDKN2AIP
hsa-miR-3915	CDO1
hsa-miR-3916	CDS1
hsa-miR-3917	CDS2
hsa-miR-3918	CDV3
hsa-miR-3919	CDYL
hsa-miR-3920	CDYL2
hsa-miR-3921	CEBPB
hsa-miR-3922-3p	CEBPZ
hsa-miR-3923	CECR2
hsa-miR-3924	CELF1
hsa-miR-3925-5p	CELF2
hsa-miR-3926	CELF4
hsa-miR-3927	CELF6
hsa-miR-3928	CELSR2
hsa-miR-3929	CENPBD1
hsa-miR-3934	CENPO
hsa-miR-3935	CEP112
hsa-miR-3936	CEP120
hsa-miR-3937	CEP128
hsa-miR-3938	CEP135
hsa-miR-3939	CEP152
hsa-miR-3940-3p	CEP170
hsa-miR-3941	CEP192
hsa-miR-3942-5p	CEP350
hsa-miR-3943	CEP41
hsa-miR-3945	CEP44
hsa-miR-409-3p	CEP55
hsa-miR-409-5p	CEP57
hsa-miR-410	CEP76
hsa-miR-411-3p	CEP85
hsa-miR-411-5p	CEP85L
hsa-miR-412	CEP97
hsa-miR-421	CEPT1
hsa-miR-422a	CERCAM
hsa-miR-423-3p	CERS2
hsa-miR-423-5p	CERS6
hsa-miR-424-3p	CETN3
hsa-miR-424-5p	CFL2
hsa-miR-425-3p	CGGBP1
hsa-miR-425-5p	CH25H
hsa-miR-4251	CHAF1A
hsa-miR-4252	CHAMP1
hsa-miR-4253	CHCHD3
hsa-miR-4254	CHD1
hsa-miR-4255	CHD2
hsa-miR-4256	CHD4
hsa-miR-4257	CHD6
hsa-miR-4259	CHD7
hsa-miR-4260	CHD9
hsa-miR-4261	CHEK1
hsa-miR-4262	CHFR
hsa-miR-4263	CHIC1
hsa-miR-4264	CHIC2
hsa-miR-4265	CHL1
hsa-miR-4266	CHMP2B
hsa-miR-4267	CHMP3
hsa-miR-4268	CHMP4B
hsa-miR-4269	CHMP4C
hsa-miR-4270	CHMP5
hsa-miR-4271	CHMP7
hsa-miR-4272	CHN1
hsa-miR-4273	CHN2
hsa-miR-4274	CHODL
hsa-miR-4275	CHORDC1
hsa-miR-4276	CHPT1
hsa-miR-4277	CHRD
hsa-miR-4278	CHRM3
hsa-miR-4279	CHST1
hsa-miR-4280	CHST11
hsa-miR-4281	CHST2
hsa-miR-4282	CHST3
hsa-miR-4283	CHSY1
hsa-miR-4284	CHSY3
hsa-miR-4286	CHUK
hsa-miR-4287	CHURC1
hsa-miR-4288	CIAPIN1
hsa-miR-4289	CIC
hsa-miR-429	CILP
hsa-miR-4290	CISD3
hsa-miR-4291	CIT
hsa-miR-4292	CITED2
hsa-miR-4293	CKAP4
hsa-miR-4294	CKAP5
hsa-miR-4295	CKS1B
hsa-miR-4296	CKS2
hsa-miR-4297	CLASP1
hsa-miR-4298	CLASP2
hsa-miR-4299	CLASRP
hsa-miR-4300	CLCC1
hsa-miR-4301	CLCN3
hsa-miR-4302	CLCN5
hsa-miR-4303	CLCN6
hsa-miR-4304	CLDN1
hsa-miR-4305	CLDN10
hsa-miR-4306	CLDN11
hsa-miR-4307	CLDN12
hsa-miR-4308	CLDND1
hsa-miR-4309	CLEC2D
hsa-miR-431-3p	CLGN
hsa-miR-431-5p	CLIC4
hsa-miR-4310	CLINT1
hsa-miR-4311	CLIP1
hsa-miR-4312	CLIP4
hsa-miR-4313	CLK1
hsa-miR-4314	CLK4
hsa-miR-4315	CLMP
hsa-miR-4316	CLOCK
hsa-miR-4317	CLPX
hsa-miR-4318	CLSPN
hsa-miR-4319	CLTC
hsa-miR-432-3p	CMIP
hsa-miR-432-5p	CMPK1
hsa-miR-4320	CNEP1R1
hsa-miR-4321	CNIH
hsa-miR-4322	CNIH2
hsa-miR-4323	CNKSR2
hsa-miR-4324	CNKSR3
hsa-miR-4325	CNN1
hsa-miR-4326	CNN3
hsa-miR-4327	CNNM4
hsa-miR-4328	CNOT1
hsa-miR-4329	CNOT2
hsa-miR-433	CNOT4
hsa-miR-4330	CNOT6
hsa-miR-448	CNOT6L
hsa-miR-449a	CNOT7
hsa-miR-449b-3p	CNOT8
hsa-miR-449b-5p	CNR1
hsa-miR-449c-3p	CNST
hsa-miR-449c-5p	CNTD1
hsa-miR-450a-5p	CNTLN
hsa-miR-450b-3p	CNTN1
hsa-miR-450b-5p	CNTN3
hsa-miR-451a	CNTN4
hsa-miR-452-3p	CNTNAP1
hsa-miR-452-5p	CNTRL
hsa-miR-454-3p	COBLL1
hsa-miR-454-5p	COG2
hsa-miR-455-3p	COG3
hsa-miR-455-5p	COG5
hsa-miR-466	COIL
hsa-miR-483-3p	COL10A1
hsa-miR-483-5p	COL11A1
hsa-miR-484	COL11A2
hsa-miR-485-3p	COL12A1
hsa-miR-485-5p	COL13A1
hsa-miR-486-3p	COL14A1
hsa-miR-486-5p	COL15A1
hsa-miR-487a	COL16A1
hsa-miR-487b	COL17A1
hsa-miR-488-3p	COL19A1
hsa-miR-488-5p	COL1A1
hsa-miR-489	COL1A2
hsa-miR-490-3p	COL21A1
hsa-miR-490-5p	COL22A1
hsa-miR-491-3p	COL24A1
hsa-miR-491-5p	COL25A1
hsa-miR-492	COL3A1
hsa-miR-493-3p	COL4A1
hsa-miR-493-5p	COL4A2
hsa-miR-494	COL4A3
hsa-miR-495	COL4A3BP
hsa-miR-496	COL4A4
hsa-miR-497-3p	COL4A5
hsa-miR-497-5p	COL4A6
hsa-miR-498	COL5A1
hsa-miR-499a-3p	COL5A2
hsa-miR-499a-5p	COL5A3
hsa-miR-500a-3p	COL6A3
hsa-miR-500a-5p	COL7A1
hsa-miR-500b	COL8A1
hsa-miR-501-3p	COL9A1
hsa-miR-501-5p	COPB1
hsa-miR-502-3p	COPS2
hsa-miR-502-5p	COPS4
hsa-miR-503	COPS8
hsa-miR-504	CORO1C
hsa-miR-505-3p	CORO2B
hsa-miR-505-5p	CPD
hsa-miR-506-3p	CPEB1
hsa-miR-507	CPEB2
hsa-miR-508-3p	CPEB3
hsa-miR-508-5p	CPEB4
hsa-miR-509-3-5p	CPED1
hsa-miR-509-3p	CPLX1
hsa-miR-509-5p	CPNE2
hsa-miR-510	CPNE8
hsa-miR-511	CPSF6
hsa-miR-512-3p	CPSF7
hsa-miR-512-5p	CRAMP1L
hsa-miR-513a-3p	CRBN
hsa-miR-513a-5p	CREB1
hsa-miR-513b	CREB3L1
hsa-miR-513c-5p	CREB5
hsa-miR-514a-3p	CREBBP
hsa-miR-514b-3p	CREBL2
hsa-miR-514b-5p	CREBRF
hsa-miR-515-3p	CREBZF
hsa-miR-515-5p	CREM
hsa-miR-516a-3p	CRIM1
hsa-miR-516a-5p	CRISPLD1
hsa-miR-516b-3p	CRK
hsa-miR-516b-5p	CRKL
hsa-miR-517-5p	CRLF3
hsa-miR-517a-3p	CROT
hsa-miR-517b-3p	CRTC3
hsa-miR-517c-3p	CRY1
hsa-miR-518a-3p	CRY2
hsa-miR-518a-5p	CS
hsa-miR-518b	CSDA
hsa-miR-518c-3p	CSDE1
hsa-miR-518c-5p	CSE1L
hsa-miR-518d-3p	CSF1
hsa-miR-518d-5p	CSGALNACT1
hsa-miR-518e-3p	CSGALNACT2
hsa-miR-518e-5p	CSK
hsa-miR-518f-3p	CSMD1
hsa-miR-518f-5p	CSMD2
hsa-miR-519a-3p	CSMD3
hsa-miR-519a-5p	CSNK1A1
hsa-miR-519b-3p	CSNK1A1L
hsa-miR-519b-5p	CSNK1E
hsa-miR-519c-3p	CSNK1G1
hsa-miR-519c-5p	CSNK1G3
hsa-miR-519d	CSNK2A1
hsa-miR-519e-3p	CSNK2A2
hsa-miR-519e-5p	CSPP1
hsa-miR-520a-3p	CSRNP2
hsa-miR-520a-5p	CSRNP3
hsa-miR-520b	CSRP2
hsa-miR-520c-3p	CSTF2
hsa-miR-520c-5p	CSTF3
hsa-miR-520d-3p	CTAGE5
hsa-miR-520d-5p	CTBP2
hsa-miR-520e	CTCF
hsa-miR-520f	CTDSP2
hsa-miR-520g	CTDSPL
hsa-miR-520h	CTDSPL2
hsa-miR-521	CTGF
hsa-miR-522-3p	CTHRC1
hsa-miR-522-5p	CTLA4
hsa-miR-523-5p	CTNNA1
hsa-miR-524-3p	CTNNB1
hsa-miR-524-5p	CTNND1
hsa-miR-525-3p	CTNND2
hsa-miR-525-5p	CTPS1
hsa-miR-526a	CTR9
hsa-miR-526b-3p	CTSA
hsa-miR-526b-5p	CTSC
hsa-miR-527	CTTNBP2
hsa-miR-532-3p	CTTNBP2NL
hsa-miR-532-5p	CUL1
hsa-miR-539-5p	CUL2
hsa-miR-541-3p	CUL3
hsa-miR-541-5p	CUL4A
hsa-miR-542-3p	CUL4B
hsa-miR-542-5p	CUL5
hsa-miR-543	CWC15
hsa-miR-544a	CWC22
hsa-miR-544b	CWC25
hsa-miR-545-3p	CXCL10
hsa-miR-545-5p	CXCL12
hsa-miR-548a-3p	CXCL14
hsa-miR-548a-5p	CXCL5
hsa-miR-548aa	CXCR4
hsa-miR-548b-3p	CXCR5
hsa-miR-548b-5p	CXorf23
hsa-miR-548c-3p	CXXC5
hsa-miR-548c-5p	CYB561D1
hsa-miR-548d-3p	CYB5R4
hsa-miR-548d-5p	CYBRD1
hsa-miR-548e	CYFIP1
hsa-miR-548f	CYLD
hsa-miR-548g-3p	CYP26A1
hsa-miR-548h-5p	CYP26B1
hsa-miR-548i	CYP7B1
hsa-miR-548j	CYR61
hsa-miR-548k	CYTH3
hsa-miR-548l	D4S234E
hsa-miR-548m	DAAM1
hsa-miR-548n	DAB2
hsa-miR-548o-3p	DACH1
hsa-miR-548p	DACT1
hsa-miR-548q	DAG1
hsa-miR-548s	DAPK1
hsa-miR-548t-5p	DAZAP1
hsa-miR-548u	DAZAP2
hsa-miR-548v	DAZL
hsa-miR-548w	DBC1
hsa-miR-548x-3p	DBF4
hsa-miR-548y	DCAF12
hsa-miR-548z	DCAF15
hsa-miR-549	DCAF16
hsa-miR-550a-3p	DCAF5
hsa-miR-550a-5p	DCAF6
hsa-miR-550b-3p	DCAF7
hsa-miR-551a	DCAF8
hsa-miR-551b-3p	DCBLD2
hsa-miR-551b-5p	DCC
hsa-miR-552	DCLK1
hsa-miR-553	DCLK2
hsa-miR-554	DCN
hsa-miR-555	DCP1A
hsa-miR-556-3p	DCP2
hsa-miR-556-5p	DCTN4
hsa-miR-557	DCUN1D1
hsa-miR-558	DCUN1D3
hsa-miR-559	DCUN1D4
hsa-miR-561-3p	DCX
hsa-miR-562	DDHD1
hsa-miR-563	DDI2
hsa-miR-564	DDIT4
hsa-miR-566	DDN
hsa-miR-567	DDX17
hsa-miR-568	DDX19A
hsa-miR-569	DDX19B
hsa-miR-570-3p	DDX26B
hsa-miR-571	DDX3X
hsa-miR-572	DDX3Y
hsa-miR-573	DDX46
hsa-miR-574-3p	DDX5
hsa-miR-574-5p	DDX50
hsa-miR-575	DDX52
hsa-miR-576-3p	DDX6
hsa-miR-576-5p	DEDD
hsa-miR-577	DEK
hsa-miR-578	DENND1A
hsa-miR-579	DENND1B
hsa-miR-580	DENND4A
hsa-miR-581	DENND4B
hsa-miR-582-3p	DENND4C
hsa-miR-582-5p	DENND5A
hsa-miR-583	DENND5B
hsa-miR-584-5p	DEPDC1B
hsa-miR-585	DEPDC4
hsa-miR-586	DESI2
hsa-miR-587	DGKB
hsa-miR-588	DGKE
hsa-miR-589-3p	DGKH
hsa-miR-589-5p	DGKI
hsa-miR-590-3p	DGKZ
hsa-miR-590-5p	DHDDS
hsa-miR-591	DHX15
hsa-miR-592	DHX29
hsa-miR-593-3p	DHX30
hsa-miR-593-5p	DHX40
hsa-miR-595	DHX57
hsa-miR-596	DIAPH1
hsa-miR-597	DIAPH2
hsa-miR-598	DICER1
hsa-miR-599	DIDO1
hsa-miR-600	DIP2A
hsa-miR-601	DIP2B
hsa-miR-602	DIP2C
hsa-miR-603	DIRC2
hsa-miR-604	DIS3
hsa-miR-605	DIXDC1
hsa-miR-606	DKK1
hsa-miR-607	DKK3
hsa-miR-608	DLC1
hsa-miR-609	DLG1
hsa-miR-610	DLG2
hsa-miR-612	DLG3
hsa-miR-613	DLG5
hsa-miR-614	DLK2
hsa-miR-615-3p	DLL1
hsa-miR-615-5p	DLL4
hsa-miR-616-3p	DLST
hsa-miR-616-5p	DLX5
hsa-miR-617	DMD
hsa-miR-618	DMRT1
hsa-miR-619	DMRT2
hsa-miR-620	DMRT3
hsa-miR-621	DMRTA2
hsa-miR-622	DMTF1
hsa-miR-623	DMXL1
hsa-miR-624-3p	DMXL2
hsa-miR-624-5p	DNAJA2
hsa-miR-625-3p	DNAJB11
hsa-miR-625-5p	DNAJB14
hsa-miR-626	DNAJB4
hsa-miR-627	DNAJB5
hsa-miR-628-3p	DNAJB6
hsa-miR-628-5p	DNAJB9
hsa-miR-629-3p	DNAJC1
hsa-miR-629-5p	DNAJC11
hsa-miR-630	DNAJC13
hsa-miR-631	DNAJC14
hsa-miR-632	DNAJC16
hsa-miR-633	DNAJC2
hsa-miR-634	DNAJC21
hsa-miR-635	DNAJC27
hsa-miR-636	DNAJC6
hsa-miR-637	DNAJC7
hsa-miR-639	DNAJC8
hsa-miR-640	DNAL1
hsa-miR-641	DNER
hsa-miR-642a-5p	DNM2
hsa-miR-642b-3p	DNM3
hsa-miR-643	DNMT1
hsa-miR-644a	DNMT3A
hsa-miR-645	DNMT3B
hsa-miR-646	DOCK1
hsa-miR-647	DOCK10
hsa-miR-648	DOCK11
hsa-miR-649	DOCK3
hsa-miR-650	DOCK4
hsa-miR-651	DOCK5
hsa-miR-652-3p	DOCK7
hsa-miR-653	DOCK9
hsa-miR-654-3p	DOK5
hsa-miR-654-5p	DOK6
hsa-miR-655	DOLPP1
hsa-miR-656	DOPEY1
hsa-miR-657	DOT1L
hsa-miR-659-3p	DPF3
hsa-miR-660-5p	DPH1
hsa-miR-661	DPH3
hsa-miR-662	DPP3
hsa-miR-663a	DPP4
hsa-miR-663b	DPP8
hsa-miR-664-3p	DPY19L1
hsa-miR-664-5p	DPY19L3
hsa-miR-665	DPYD
hsa-miR-668	DPYSL2
hsa-miR-670	DPYSL3
hsa-miR-671-3p	DPYSL5
hsa-miR-671-5p	DR1
hsa-miR-675-3p	DRD1
hsa-miR-675-5p	DSCAML1
hsa-miR-676-3p	DSEL
hsa-miR-676-5p	DST
hsa-miR-7-1-3p	DSTYK
hsa-miR-7-2-3p	DTNA
hsa-miR-7-5p	DTWD2
hsa-miR-708-3p	DTX2
hsa-miR-708-5p	DUSP1
hsa-miR-711	DUSP2
hsa-miR-720	DUSP5
hsa-miR-744-3p	DUSP6
hsa-miR-744-5p	DUSP7
hsa-miR-758	DVL2
hsa-miR-759	DVL3
hsa-miR-760	DYNC1I1
hsa-miR-761	DYNC1LI1
hsa-miR-762	DYNC1LI2
hsa-miR-764	DYNC2LI1
hsa-miR-765	DYNLL2
hsa-miR-766-3p	DYNLT3
hsa-miR-767-3p	DYRK1A
hsa-miR-767-5p	DYRK1B
hsa-miR-769-3p	DYRK2
hsa-miR-769-5p	E2F1
hsa-miR-770-5p	E2F2
hsa-miR-802	E2F3
hsa-miR-873-5p	E2F5
hsa-miR-874	E2F6
hsa-miR-875-3p	E2F7
hsa-miR-875-5p	E2F8
hsa-miR-876-3p	EAF1
hsa-miR-876-5p	EBAG9
hsa-miR-877-3p	EBF1
hsa-miR-877-5p	EBF2
hsa-miR-885-3p	EBF3
hsa-miR-885-5p	ECT2
hsa-miR-887	EDA
hsa-miR-888-3p	EDAR
hsa-miR-888-5p	EDC3
hsa-miR-889	EDEM1
hsa-miR-890	EDEM3
hsa-miR-891a	EDIL3
hsa-miR-891b	EDN1
hsa-miR-892a	EDNRA
hsa-miR-892b	EDNRB
hsa-miR-9-3p	EEA1
hsa-miR-9-5p	EED
hsa-miR-920	EFEMP1
hsa-miR-921	EFHA2
hsa-miR-922	EFHD2
hsa-miR-924	EFNA5
hsa-miR-92a-1-5p	EFNB1
hsa-miR-92a-2-5p	EFNB2
hsa-miR-92a-3p	EFNB3
hsa-miR-92b-3p	EFR3A
hsa-miR-93-3p	EGLN1
hsa-miR-93-5p	EGR1
hsa-miR-933	EGR2
hsa-miR-934	EGR3
hsa-miR-935	EHBP1
hsa-miR-936	EHD2
hsa-miR-937	EHF
hsa-miR-938	EHMT1
hsa-miR-939	EIF1
hsa-miR-940	EIF2B5
hsa-miR-941	EIF2C1
hsa-miR-942	EIF2C2
hsa-miR-943	EIF2C3
hsa-miR-944	EIF2C4
hsa-miR-95	EIF2S1
hsa-miR-96-3p	EIF2S2
hsa-miR-96-5p	EIF3A
hsa-miR-98	EIF3J
hsa-miR-99a-3p	EIF4A1
hsa-miR-99a-5p	EIF4A2
hsa-miR-99b-3p	EIF4B
hsa-miR-99b-5p	EIF4E
	EIF4E3
	EIF4EBP2
	EIF4ENIF1
	EIF4G2
	EIF4G3
	EIF4H
	EIF5
	EIF5A
	EIF5A2
	EIF5AL1
	ELAVL1
	ELAVL2
	ELAVL4
	ELF1
	ELF2
	ELF4
	ELF5
	ELK3
	ELK4
	ELL
	ELL2
	ELMO1
	ELMO2
	ELMOD1
	ELMOD2
	ELN
	ELOVL2
	ELOVL4
	ELOVL5
	ELP4
	EML1
	EML4
	EMP1
	EMX2
	EN1
	EN2
	ENAH
	ENC1
	ENOSF1
	ENOX2
	ENPEP
	ENPP2
	ENPP5
	ENTPD5
	ENTPD7
	EOGT
	EOMES
	EP300
	EP400
	EPAS1
	EPB41
	EPB41L1
	EPB41L2
	EPB41L3
	EPB41L4B
	EPC1
	EPC2
	EPHA3
	EPHA4
	EPHA5
	EPHA7
	EPHB1
	EPHB2
	EPHB3
	EPHB4
	EPM2AIP1
	EPN2
	EPS15
	EPS8
	EPT1
	ERBB2IP
	ERBB3
	ERBB4
	ERC1
	ERC2
	ERCC4
	ERCC6
	ERCC6L2
	EREG
	ERG
	ERGIC1
	ERGIC2
	ERI1
	ERLIN1
	ERLIN2
	ERMN
	ERO1L
	ERO1LB
	ERRFI1
	ESCO1
	ESPL1
	ESR1
	ESRP1
	ESRP2
	ESRRA
	ESRRG
	ESYT2
	ETAA1
	ETF1
	ETNK1
	ETS1
	ETS2
	ETV1
	ETV3
	ETV5
	ETV6
	EVI2A
	EVI5
	EWSR1
	EXO1
	EXOC5
	EXOSC8
	EXPH5
	EYA1
	EYA4
	EZH1
	EZH2
	F13A1
	F3
	FAF1
	FAF2
	FAM102A
	FAM103A1
	FAM104A
	FAM107B
	FAM108B1
	FAM116A
	FAM117A
	FAM117B
	FAM118B
	FAM120A
	FAM120C
	FAM122A
	FAM122B
	FAM123B
	FAM126A
	FAM126B
	FAM131B
	FAM133B
	FAM134A
	FAM134B
	FAM134C
	FAM135A
	FAM136A
	FAM13A
	FAM13B
	FAM13C
	FAM150B
	FAM155A
	FAM160A1
	FAM160A2
	FAM160B1
	FAM168A
	FAM168B
	FAM171A1
	FAM172A
	FAM175B
	FAM176A
	FAM178A
	FAM179B
	FAM188A
	FAM189A2
	FAM18B1
	FAM18B2
	FAM190A
	FAM190B
	FAM193A
	FAM196A
	FAM199X
	FAM19A1
	FAM19A5
	FAM208A
	FAM208B
	FAM20B
	FAM210A
	FAM214A
	FAM21B
	FAM21C
	FAM222B
	FAM3C
	FAM40A
	FAM43A
	FAM45A
	FAM46A
	FAM48A
	FAM49A
	FAM49B
	FAM53C
	FAM54B
	FAM57A
	FAM59A
	FAM60A
	FAM63B
	FAM65A
	FAM65B
	FAM70A
	FAM73A
	FAM76A
	FAM76B
	FAM81A
	FAM84B
	FAM8A1
	FAM91A1
	FAM96A
	FAM98A
	FAM98B
	FANCA
	FAP
	FAR1
	FARP1
	FASLG
	FASTK
	FAT1
	FAT2
	FAT3
	FAT4
	FAXC
	FBN1
	FBN2
	FBXL17
	FBXL19
	FBXL20
	FBXL3
	FBXL4
	FBXL5
	FBXL7
	FBXO10
	FBXO11
	FBXO17
	FBXO21
	FBXO28
	FBXO3
	FBXO30
	FBXO31
	FBXO33
	FBXO34
	FBXO38
	FBXO45
	FBXO48
	FBXO5
	FBXO8
	FBXW11
	FBXW7
	FCHO1
	FCHO2
	FCHSD2
	FEM1B
	FEM1C
	FERMT2
	FEZ2
	FEZF2
	FGD1
	FGD4
	FGD5
	FGD6
	FGF1
	FGF11
	FGF13
	FGF14
	FGF18
	FGF2
	FGF7
	FGF9
	FGFR1
	FGFR1OP2
	FIBIN
	FIGF
	FIGN
	FIGNL2
	FILIP1L
	FIP1L1
	FKBP1A
	FKBP1B
	FKBP3
	FLI1
	FLOT2
	FLRT2
	FLRT3
	FLT1
	FLVCR2
	FMNL2
	FMR1
	FN1
	FNBP1L
	FNBP4
	FNDC3A
	FNDC3B
	FNDC4
	FNIP1
	FNIP2
	FNTA
	FOPNL
	FOS
	FOSB
	FOSL1
	FOSL2
	FOXA1
	FOXC1
	FOXD1
	FOXF1
	FOXF2
	FOXG1
	FOXJ2
	FOXJ3
	FOXN2
	FOXN3
	FOXO1
	FOXO3
	FOXP1
	FOXP2
	FOXQ1
	FRK
	FRMD3
	FRMD4A
	FRMD4B
	FRMD6
	FRS2
	FRY
	FRYL
	FRZB
	FSCN1
	FST
	FSTL1
	FTSJD1
	FUBP1
	FUBP3
	FURIN
	FUT4
	FUT8
	FXR1
	FYCO1
	FYTTD1
	FZD1
	FZD10
	FZD3
	FZD4
	FZD6
	FZD7
	G0S2
	G2E3
	G3BP1
	G3BP2
	GAB1
	GABARAPL2
	GABBR2
	GABPA
	GABPB1
	GABPB2
	GABRB2
	GABRB3
	GABRP
	GADD45A
	GALC
	GALNT1
	GALNT10
	GALNT13
	GALNT2
	GALNT3
	GALNT4
	GALNT7
	GALNTL2
	GAN
	GANAB
	GAP43
	GAPVD1
	GARS
	GAS1
	GAS2
	GAS7
	GATA2
	GATA3
	GATA6
	GATAD2B
	GATC
	GATM
	GBF1
	GCC2
	GCFC1
	GCLC
	GCLM
	GCN1L1
	GCNT2
	GCNT4
	GDAP2
	GDF10
	GDF11
	GDF6
	GDI2
	GDPD1
	GEM
	GFPT1
	GFPT2
	GFRA1
	GGA1
	GGA3
	GGNBP2
	GHITM
	GHR
	GIGYF1
	GIGYF2
	GIT2
	GJA1
	GJC1
	GKAP1
	GLCCI1
	GLCE
	GLG1
	GLI2
	GLI3
	GLIPR1
	GLIS1
	GLIS2
	GLIS3
	GLRA3
	GLRB
	GLS
	GLS2
	GLUD1
	GLUD2
	GLUL
	GLYR1
	GMCL1
	GMDS
	GMEB1
	GMFB
	GNA12
	GNA13
	GNAI1
	GNAI3
	GNAL
	GNAO1
	GNAQ
	GNB1
	GNB4
	GNG10
	GNG12
	GNG2
	GNPDA2
	GNPTAB
	GNRHR
	GNS
	GOLGA1
	GOLGA2
	GOLGA4
	GOLGA7
	GOLIM4
	GOLPH3
	GOLT1B
	GON4L
	GOPC
	GORAB
	GORASP2
	GOSR1
	GPAM
	GPATCH8
	GPBP1
	GPBP1L1
	GPC4
	GPC6
	GPCPD1
	GPD2
	GPKOW
	GPM6A
	GPM6B
	GPN1
	GPR116
	GPR124
	GPR125
	GPR126
	GPR135
	GPR137
	GPR137B
	GPR137C
	GPR153
	GPR156
	GPR158
	GPR180
	GPR3
	GPR34
	GPR37
	GPR63
	GPR64
	GPR85
	GPR88
	GPRASP2
	GPX7
	GRAMD1A
	GRAMD1B
	GRAMD3
	GRB10
	GRB2
	GREB1
	GREM1
	GREM2
	GRHL1
	GRHL2
	GRHL3
	GRIA2
	GRIA3
	GRIA4
	GRID1
	GRIK2
	GRIN2A
	GRIN3A
	GRIP1
	GRK5
	GRK6
	GRM3
	GRM5
	GRM7
	GRPEL2
	GRSF1
	GSK3B
	GSPT1
	GSPT2
	GTDC1
	GTF2A1
	GTF2B
	GTF2H1
	GTF2I
	GTPBP1
	GTPBP2
	GUCY1A3
	GUCY1B3
	GULP1
	GXYLT1
	GXYLT2
	GZF1
	H2AFY
	H2AFZ
	H3F3A
	H3F3B
	H3F3C
	HABP4
	HACE1
	HAND2
	HAPLN1
	HAS2
	HAT1
	HBEGF
	HBP1
	HBS1L
	HCFC1
	HCFC2
	HCN1
	HCN2
	HDAC4
	HDAC5
	HDAC9
	HDGF
	HDGFRP3
	HDHD2
	HDX
	HEATR5A
	HECA
	HECTD1
	HECTD2
	HECW1
	HECW2
	HEG1
	HELZ
	HEPHL1
	HERC1
	HERC2
	HERC3
	HERC4
	HERPUD1
	HERPUD2
	HEY1
	HEY2
	HGF
	HIAT1
	HIATL1
	HIC1
	HIF1A
	HIF1AN
	HIPK1
	HIPK2
	HIPK3
	HIRA
	HIST1H1C
	HIST1H1D
	HIST1H1E
	HIST1H2AC
	HIST1H2AD
	HIST1H2AE
	HIST1H2AJ
	HIST1H2AK
	HIST1H2AM
	HIST1H2BC
	HIST1H2BE
	HIST1H2BF
	HIST1H2BG
	HIST1H2BH
	HIST1H2BL
	HIST1H2BN
	HIST1H2BO
	HIST1H3B
	HIST1H3D
	HIST1H3E
	HIST1H3F
	HIST1H3H
	HIST1H3J
	HIST1H4D
	HIST1H4H
	HIST2H2AA3
	HIST2H2BE
	HIST2H3C
	HIST2H3D
	HIST3H2A
	HIST3H2BB
	HIVEP1
	HIVEP2
	HK1
	HK2
	HLF
	HLTF
	HLX
	HMBOX1
	HMCN1
	HMG20A
	HMGA1
	HMGA2
	HMGB2
	HMGB3
	HMGCR
	HMGCS1
	HMGN2
	HMGN3
	HMGXB4
	HMP19
	HN1
	HNRNPA0
	HNRNPA1
	HNRNPA1L2
	HNRNPA2B1
	HNRNPA3
	HNRNPC
	HNRNPD
	HNRNPF
	HNRNPH1
	HNRNPH2
	HNRNPH3
	HNRNPK
	HNRNPL
	HNRNPM
	HNRNPR
	HNRNPU
	HNRNPUL1
	HNRNPUL2
	HNRPDL
	HNRPLL
	HOMER1
	HOOK1
	HOOK3
	HOXA1
	HOXA10
	HOXA11
	HOXA3
	HOXA4
	HOXA5
	HOXA7
	HOXA9
	HOXB3
	HOXB4
	HOXB5
	HOXB8
	HOXC11
	HOXC4
	HOXC6
	HOXC8
	HOXD1
	HOXD10
	HOXD8
	HP1BP3
	HPGD
	HPRT1
	HPS5
	HS2ST1
	HS3ST3A1
	HS3ST3B1
	HS3ST5
	HS6ST2
	HSF2
	HSF5
	HSP90AB1
	HSPA13
	HSPA14
	HSPA4
	HSPA4L
	HSPA5
	HSPA8
	HSPA9
	HSPB8
	HSPH1
	HTR2A
	HTR2C
	HTR7
	HTRA1
	HTRA3
	HUWE1
	IBSP
	IBTK
	ICK
	ICMT
	ID1
	ID2
	ID4
	IDE
	IDH1
	IER3IP1
	IFFO2
	IFRD1
	IFT81
	IGDCC3
	IGDCC4
	IGF1
	IGF1R
	IGF2BP1
	IGF2BP2
	IGF2BP3
	IGF2R
	IGFBP3
	IGFBP5
	IGFBP7
	IGIP
	IGSF1
	IGSF10
	IGSF3
	IKBIP
	IKBKAP
	IKBKB
	IKBKE
	IKZF1
	IKZF2
	IKZF4
	IL10
	IL13RA1
	IL1RAP
	IL6
	IL6ST
	ILF3
	IMPACT
	IMPAD1
	INADL
	ING3
	INHBA
	INHBB
	INO80
	INO80D
	INPP4A
	INPP5A
	INSIG2
	INSM1
	INSR
	INTS2
	INTS6
	INTS8
	INTU
	IP6K2
	IPMK
	IPO11
	IPO5
	IPO7
	IPO8
	IPO9
	IPPK
	IQCH
	IQCK
	IQGAP1
	IQGAP2
	IQSEC1
	IREB2
	IRF1
	IRF2
	IRF2BP1
	IRF2BP2
	IRF2BPL
	IRF4
	IRF9
	IRS1
	IRS2
	IRX4
	IRX5
	ISCA2
	ISG20L2
	ISL1
	ISM1
	IST1
	ITCH
	ITFG1
	ITGA11
	ITGA4
	ITGA5
	ITGA6
	ITGAV
	ITGB1
	ITGB3
	ITGB8
	ITM2B
	ITM2C
	ITPK1
	ITPR1
	ITPR3
	ITPRIPL2
	ITSN1
	ITSN2
	IVNS1ABP
	JAG1
	JAK1
[truncated: 2,888 more rows]

## Sheet: BioCarta
No.	Pathway	Regulator		Number of genes			Poisson binomial test					List of targets
		Type	ID	In pathway	In targetome	As target	Mean	STD	Z-stat	P-val (two-tailed)	Adjusted P-val
1	-arrestins in gpcr desensitization	miRNA	hsa-miR-130a-3p	28	16	5	0.491169	0.680626	6.62454	3.48331e-11	9.67491e-05	CXCL12;CXCR4;EDN1;GNB1;HTR2C
2	-arrestins in gpcr desensitization	miRNA	hsa-miR-381	28	16	5	0.491169	0.680626	6.62454	3.48331e-11	9.67491e-05	ADRA1B;ADRB2;CXCL12;CXCR4;GNB1
3	actions of nitric oxide in the heart	miRNA	hsa-miR-106a-5p	41	24	7	1.04794	0.988109	6.02369	1.70485e-09	0.00473523	FLT1;GUCY1A3;PIK3R1;PRKACB;PRKAR1A;RYR2;VEGFA
4	actions of nitric oxide in the heart	miRNA	hsa-miR-106b-5p	41	24	7	1.04794	0.988109	6.02369	1.70485e-09	0.00473523	FLT1;GUCY1A3;PIK3R1;PRKACB;PRKAR1A;RYR2;VEGFA
5	actions of nitric oxide in the heart	miRNA	hsa-miR-15a-5p	41	24	7	1.04794	0.988109	6.02369	1.70485e-09	0.00473523	GNAQ;GNB1;PDE3B;PIK3R1;PRKAR2A;PRKG1;VEGFA
6	actions of nitric oxide in the heart	miRNA	hsa-miR-15b-5p	41	24	7	1.04794	0.988109	6.02369	1.70485e-09	0.00473523	GNAQ;GNB1;KDR;PDE3B;PRKAR2A;PRKG1;VEGFA
7	actions of nitric oxide in the heart	miRNA	hsa-miR-16-5p	41	24	7	1.04794	0.988109	6.02369	1.70485e-09	0.00473523	GNAQ;KDR;PDE3B;PIK3R1;PRKAR2A;PRKG1;VEGFA
8	actions of nitric oxide in the heart	miRNA	hsa-miR-17-5p	41	24	7	1.04794	0.988109	6.02369	1.70485e-09	0.00473523	FLT1;GUCY1A3;PIK3R1;PRKACB;PRKAR1A;RYR2;VEGFA
9	actions of nitric oxide in the heart	miRNA	hsa-miR-195-5p	41	24	7	1.04794	0.988109	6.02369	1.70485e-09	0.00473523	GNAQ;GNB1;KDR;PDE3B;PIK3R1;PRKG1;VEGFA
10	actions of nitric oxide in the heart	miRNA	hsa-miR-200b-3p	41	24	7	1.04794	0.988109	6.02369	1.70485e-09	0.00473523	FLT1;KDR;PLCG1;PRKACB;PRKAR1A;PRKAR2B;VEGFA
11	actions of nitric oxide in the heart	miRNA	hsa-miR-200c-3p	41	24	7	1.04794	0.988109	6.02369	1.70485e-09	0.00473523	FLT1;KDR;PLCG1;PRKACB;PRKAR1A;PRKAR2B;VEGFA
12	actions of nitric oxide in the heart	miRNA	hsa-miR-20a-5p	41	24	8	1.04794	0.988109	7.03572	1.98235e-12	5.50599e-06	FLT1;GNB1;GUCY1A3;PIK3R1;PRKACB;PRKAR1A;RYR2;VEGFA
13	actions of nitric oxide in the heart	miRNA	hsa-miR-320d	41	24	7	1.04794	0.988109	6.02369	1.70485e-09	0.00473523	GNB1;PDE3A;PDE3B;PIK3CA;PRKAR1A;PRKG1;VEGFA
14	actions of nitric oxide in the heart	miRNA	hsa-miR-424-5p	41	24	7	1.04794	0.988109	6.02369	1.70485e-09	0.00473523	GNAQ;KDR;PDE3B;PIK3R1;PRKAR2A;PRKG1;VEGFA
15	actions of nitric oxide in the heart	miRNA	hsa-miR-429	41	24	7	1.04794	0.988109	6.02369	1.70485e-09	0.00473523	FLT1;KDR;PLCG1;PRKACB;PRKAR1A;PRKAR2B;VEGFA
16	activation of camp-dependent protein kinase pka	miRNA	hsa-miR-130a-3p	29	17	6	0.684609	0.799201	6.65088	2.91346e-11	8.09215e-05	CXCL12;CXCR4;EDN1;GNB1;HTR2C;PRKACB
17	activation of camp-dependent protein kinase pka	miRNA	hsa-miR-381	29	17	6	0.684609	0.799201	6.65088	2.91346e-11	8.09215e-05	ADRA1B;ADRB2;CXCL12;CXCR4;GNB1;PRKACB
18	activation of csk by camp-dependent protein kinase inhibits signaling through the t cell receptor	miRNA	hsa-miR-130a-3p	41	19	7	0.767031	0.846498	7.36324	1.79499e-13	4.98559e-07	CSK;CXCL12;CXCR4;EDN1;GNB1;HTR2C;PRKACB
19	activation of csk by camp-dependent protein kinase inhibits signaling through the t cell receptor	miRNA	hsa-miR-301b	41	19	6	0.767031	0.846498	6.1819	6.33346e-10	0.00175912	CSK;CXCL12;EDN1;GNB1;HTR2C;PRKACB
20	activation of csk by camp-dependent protein kinase inhibits signaling through the t cell receptor	miRNA	hsa-miR-3143	41	19	6	0.767031	0.846498	6.1819	6.33346e-10	0.00175912	CREBBP;CXCL12;EDN1;GNB1;HTR2C;PRKACB
21	activation of csk by camp-dependent protein kinase inhibits signaling through the t cell receptor	miRNA	hsa-miR-381	41	19	6	0.767031	0.846498	6.1819	6.33346e-10	0.00175912	ADRA1B;ADRB2;CXCL12;CXCR4;GNB1;PRKACB
22	activation of csk by camp-dependent protein kinase inhibits signaling through the t cell receptor	miRNA	hsa-miR-410	41	19	6	0.767031	0.846498	6.1819	6.33346e-10	0.00175912	CREBBP;CXCL12;CXCR4;EDNRB;HTR2C;PRKAR2B
23	activation of csk by camp-dependent protein kinase inhibits signaling through the t cell receptor	miRNA	hsa-miR-429	41	19	6	0.767031	0.846498	6.1819	6.33346e-10	0.00175912	ADRB2;CREBBP;CXCL12;PRKACB;PRKAR1A;PRKAR2B
24	adp-ribosylation factor	miRNA	hsa-let-7f-1-3p	28	17	6	0.643398	0.772975	6.92985	4.21287e-12	1.17013e-05	ARAP2;ARF1;ARFGEF2;ARHGAP5;ARHGAP6;ASAP1
25	adp-ribosylation factor	miRNA	hsa-let-7f-2-3p	28	17	6	0.643398	0.772975	6.92985	4.21287e-12	1.17013e-05	ARAP2;ARFGEF2;ARHGAP5;ARHGAP6;ASAP1;ASAP2
26	adp-ribosylation factor	miRNA	hsa-miR-20a-5p	28	17	6	0.643398	0.772975	6.92985	4.21287e-12	1.17013e-05	ARAP2;ARF1;ARHGAP1;CHN1;GBF1;KDELR2
27	adp-ribosylation factor	miRNA	hsa-miR-340-5p	28	17	6	0.643398	0.772975	6.92985	4.21287e-12	1.17013e-05	ARFGEF1;ARHGAP5;ARHGAP6;ASAP1;ASAP2;RALBP1
28	agrin in postsynaptic differentiation	miRNA	hsa-miR-106a-5p	47	37	10	1.46594	1.15551	7.38555	1.51824e-13	4.21692e-07	ARHGEF7;GIT2;LAMA3;LAMC1;NRG2;NRG3;PAK3;PAK7;PTK2;SRC
29	agrin in postsynaptic differentiation	miRNA	hsa-miR-106b-5p	47	37	10	1.46594	1.15551	7.38555	1.51824e-13	4.21692e-07	GIT2;ITGB1;LAMA3;LAMC1;MAPK1;NRG3;PAK7;PTK2;RAPSN;SP1
30	agrin in postsynaptic differentiation	miRNA	hsa-miR-135b-5p	47	37	9	1.46594	1.15551	6.52013	7.02465e-11	0.00019511	ARHGEF6;ARHGEF7;DAG1;NRG1;NRG2;PAK7;PTK2;SP1;UTRN
31	agrin in postsynaptic differentiation	miRNA	hsa-miR-200b-3p	47	37	9	1.46594	1.15551	6.52013	7.02465e-11	0.00019511	CDC42;DAG1;DMD;GIT2;NRG1;PAK6;PAK7;RAC1;SP1
32	agrin in postsynaptic differentiation	miRNA	hsa-miR-200c-3p	47	37	10	1.46594	1.15551	7.38555	1.51824e-13	4.21692e-07	CDC42;DAG1;DMD;GIT2;JUN;NRG1;PAK6;PAK7;RAC1;SP1
33	agrin in postsynaptic differentiation	miRNA	hsa-miR-20a-5p	47	37	9	1.46594	1.15551	6.52013	7.02465e-11	0.00019511	ARHGEF7;GIT2;ITGB1;LAMA3;NRG2;NRG3;PAK7;PTK2;RAPSN
34	agrin in postsynaptic differentiation	miRNA	hsa-miR-3662	47	37	9	1.46594	1.15551	6.52013	7.02465e-11	0.00019511	ACTA1;CDC42;DAG1;DMD;ITGB1;NRG2;PAK2;PAK7;SP1
35	agrin in postsynaptic differentiation	miRNA	hsa-miR-495	47	37	11	1.46594	1.15551	8.25097	1.57114e-16	4.36385e-10	ACTA1;ARHGEF7;CDC42;DAG1;DMD;JUN;NRG1;PAK3;PAK7;PTK2;RAC1
36	agrin in postsynaptic differentiation	miRNA	hsa-miR-506-3p	47	37	9	1.46594	1.15551	6.52013	7.02465e-11	0.00019511	ARHGEF7;DMD;ITGB1;LAMC1;MAPK1;NRG1;NRG2;RAC1;SP1
37	agrin in postsynaptic differentiation	miRNA	hsa-miR-545-3p	47	37	9	1.46594	1.15551	6.52013	7.02465e-11	0.00019511	ARHGEF7;CDC42;CTTN;GIT2;NRG1;NRG2;PAK1;PAK2;PAK7
38	akt signaling pathway	miRNA	hsa-miR-9-3p	18	15	5	0.571909	0.730685	6.06019	1.35961e-09	0.00377632	PDPK1;PIK3CA;PIK3R1;PPP2CA;YWHAH
39	alk in cardiac myocytes	miRNA	hsa-miR-106a-5p	27	21	8	1.00925	0.955155	7.31896	2.499e-13	6.94098e-07	BMP2;BMPR2;MAP3K7;MEF2C;SMAD1;SMAD4;SMAD6;TGFBR2
40	alk in cardiac myocytes	miRNA	hsa-miR-106b-5p	27	21	8	1.00925	0.955155	7.31896	2.499e-13	6.94098e-07	BMP2;BMPR2;MAP3K7;MEF2C;SMAD1;SMAD4;SMAD6;TGFBR2
41	alk in cardiac myocytes	miRNA	hsa-miR-135b-5p	27	21	7	1.00925	0.955155	6.27201	3.56417e-10	0.00098995	BMPR1A;BMPR2;MEF2C;NOG;SMAD4;SMAD5;TGFBR2
42	alk in cardiac myocytes	miRNA	hsa-miR-17-5p	27	21	7	1.00925	0.955155	6.27201	3.56417e-10	0.00098995	BMPR2;MAP3K7;MEF2C;SMAD1;SMAD4;SMAD6;TGFBR2
43	alk in cardiac myocytes	miRNA	hsa-miR-20b-5p	27	21	7	1.00925	0.955155	6.27201	3.56417e-10	0.00098995	BMP2;BMPR2;MAP3K7;MEF2C;SMAD1;SMAD6;TGFBR2
44	alk in cardiac myocytes	miRNA	hsa-miR-224-5p	27	21	8	1.00925	0.955155	7.31896	2.499e-13	6.94098e-07	ATF2;BMP4;CHRD;MAP3K7;SMAD4;SMAD5;TGFB2;TGFBR2
45	alk in cardiac myocytes	miRNA	hsa-miR-545-3p	27	21	8	1.00925	0.955155	7.31896	2.499e-13	6.94098e-07	BMP2;BMPR2;CHRD;MAP3K7;MEF2C;SMAD1;SMAD4;SMAD5
46	alk in cardiac myocytes	miRNA	hsa-miR-548t-5p	27	21	7	1.00925	0.955155	6.27201	3.56417e-10	0.00098995	ATF2;BMP2;BMP4;BMPR1A;MEF2C;SMAD1;SMAD4
47	alk in cardiac myocytes	miRNA	hsa-miR-93-5p	27	21	7	1.00925	0.955155	6.27201	3.56417e-10	0.00098995	BMP2;BMPR2;MAP3K7;MEF2C;SMAD1;SMAD6;TGFBR2
48	apoptotic dna-fragmentation and tissue homeostasis	miRNA	hsa-let-7d-5p	11	5	2	0.0513036	0.223948	8.70156	3.27353e-18	9.09224e-12	CASP3;HMGB2
49	apoptotic dna-fragmentation and tissue homeostasis	miRNA	hsa-miR-130a-5p	11	5	2	0.0513036	0.223948	8.70156	3.27353e-18	9.09224e-12	CASP7;HMGB2
50	apoptotic dna-fragmentation and tissue homeostasis	miRNA	hsa-miR-23a-3p	11	5	2	0.0513036	0.223948	8.70156	3.27353e-18	9.09224e-12	CASP7;HMGB2
51	apoptotic dna-fragmentation and tissue homeostasis	miRNA	hsa-miR-23b-3p	11	5	2	0.0513036	0.223948	8.70156	3.27353e-18	9.09224e-12	CASP7;HMGB2
52	apoptotic dna-fragmentation and tissue homeostasis	miRNA	hsa-miR-23c	11	5	2	0.0513036	0.223948	8.70156	3.27353e-18	9.09224e-12	CASP7;HMGB2
53	apoptotic dna-fragmentation and tissue homeostasis	miRNA	hsa-miR-524-5p	11	5	2	0.0513036	0.223948	8.70156	3.27353e-18	9.09224e-12	H1F0;HMGB2
54	apoptotic dna-fragmentation and tissue homeostasis	miRNA	hsa-miR-548d-3p	11	5	2	0.0513036	0.223948	8.70156	3.27353e-18	9.09224e-12	CASP3;HMGB2
55	apoptotic signaling in response to dna damage	miRNA	hsa-let-7a-5p	14	8	3	0.121951	0.344117	8.36358	6.08432e-17	1.68992e-10	BCL2L1;CASP3;TP53
56	apoptotic signaling in response to dna damage	miRNA	hsa-let-7b-5p	14	8	3	0.121951	0.344117	8.36358	6.08432e-17	1.68992e-10	BCL2L1;CASP3;TP53
57	apoptotic signaling in response to dna damage	miRNA	hsa-let-7c	14	8	3	0.121951	0.344117	8.36358	6.08432e-17	1.68992e-10	BCL2L1;CASP3;TP53
58	apoptotic signaling in response to dna damage	miRNA	hsa-let-7d-5p	14	8	3	0.121951	0.344117	8.36358	6.08432e-17	1.68992e-10	BCL2L1;CASP3;TP53
59	apoptotic signaling in response to dna damage	miRNA	hsa-let-7f-5p	14	8	3	0.121951	0.344117	8.36358	6.08432e-17	1.68992e-10	BCL2L1;CASP3;TP53
60	apoptotic signaling in response to dna damage	miRNA	hsa-let-7g-5p	14	8	3	0.121951	0.344117	8.36358	6.08432e-17	1.68992e-10	BCL2L1;CASP3;TP53
61	apoptotic signaling in response to dna damage	miRNA	hsa-let-7i-5p	14	8	3	0.121951	0.344117	8.36358	6.08432e-17	1.68992e-10	BCL2L1;CASP3;TP53
62	apoptotic signaling in response to dna damage	miRNA	hsa-miR-98	14	8	3	0.121951	0.344117	8.36358	6.08432e-17	1.68992e-10	BCL2L1;CASP3;TP53
63	aspirin blocks signaling pathway involved in platelet activation	miRNA	hsa-miR-19a-3p	17	9	7	0.565181	0.704729	9.13092	6.79196e-20	1.88647e-13	GNAI1;GNB1;MAPK1;PLCB1;PRKCA;PRKCB;RAF1
64	aspirin blocks signaling pathway involved in platelet activation	miRNA	hsa-miR-19b-3p	17	9	5	0.565181	0.704729	6.29295	3.11489e-10	0.000865162	GNAI1;GNB1;MAPK1;PLCB1;RAF1
65	attenuation of gpcr signaling	miRNA	hsa-miR-183-5p	13	8	5	0.420522	0.62271	7.35411	1.92203e-13	5.33845e-07	GNB1;PRKACB;PRKAR1A;PRKCA;PRKCB
66	attenuation of gpcr signaling	miRNA	hsa-miR-200b-3p	13	8	5	0.420522	0.62271	7.35411	1.92203e-13	5.33845e-07	PRKACB;PRKAR1A;PRKAR2B;PRKCA;PRKCB
67	attenuation of gpcr signaling	miRNA	hsa-miR-429	13	8	5	0.420522	0.62271	7.35411	1.92203e-13	5.33845e-07	PRKACB;PRKAR1A;PRKAR2B;PRKCA;PRKCB
68	b cell survival pathway	miRNA	hsa-miR-148b-3p	13	10	4	0.301934	0.533929	6.92613	4.32509e-12	1.2013e-05	DPF2;PDPK1;PIK3CA;PIK3R1
69	b cell survival pathway	miRNA	hsa-miR-9-3p	13	10	5	0.301934	0.533929	8.79904	1.37991e-18	3.83271e-12	CASP7;ITGB1;PDPK1;PIK3CA;PIK3R1
70	basic mechanisms of sumoylation	miRNA	hsa-miR-1305	6	5	2	0.0925147	0.299376	6.37154	1.87139e-10	0.000519779	SUMO1;UBA2
71	basic mechanisms of sumoylation	miRNA	hsa-miR-16-2-3p	6	5	2	0.0925147	0.299376	6.37154	1.87139e-10	0.000519779	UBA2;UBE2I
72	basic mechanisms of sumoylation	miRNA	hsa-miR-3163	6	5	2	0.0925147	0.299376	6.37154	1.87139e-10	0.000519779	SUMO1;UBE2I
73	basic mechanisms of sumoylation	miRNA	hsa-miR-532-5p	6	5	2	0.0925147	0.299376	6.37154	1.87139e-10	0.000519779	SUMO1;UBE2I
74	basic mechanisms of sumoylation	miRNA	hsa-miR-548x-3p	6	5	2	0.0925147	0.299376	6.37154	1.87139e-10	0.000519779	SUMO1;UBA2
75	basic mechanisms of sumoylation	miRNA	hsa-miR-570-3p	6	5	2	0.0925147	0.299376	6.37154	1.87139e-10	0.000519779	SUMO1;UBA2
76	bioactive peptide induced signaling pathway	miRNA	hsa-miR-19a-3p	33	25	8	0.853658	0.89388	7.99474	1.29848e-15	3.60653e-09	CAMK2G;GNAI1;GNB1;MAPK1;MAPK14;PIK3CA;PRKCA;PRKCB
77	bone remodeling	miRNA	hsa-miR-548d-3p	16	10	4	0.243061	0.479387	7.83696	4.61585e-15	1.28205e-08	CHUK;FOS;FOSL2;TNFSF11
78	btg family proteins and cell cycle regulation	miRNA	hsa-let-7d-5p	9	8	4	0.256518	0.492807	7.59625	3.04835e-14	8.4668e-08	BTG2;CCND1;RB1;TP53
79	btg family proteins and cell cycle regulation	miRNA	hsa-let-7g-5p	9	8	4	0.256518	0.492807	7.59625	3.04835e-14	8.4668e-08	BTG2;CCND1;RB1;TP53
80	btg family proteins and cell cycle regulation	miRNA	hsa-let-7i-5p	9	8	4	0.256518	0.492807	7.59625	3.04835e-14	8.4668e-08	BTG2;CCND1;RB1;TP53
81	btg family proteins and cell cycle regulation	miRNA	hsa-miR-106b-5p	9	8	4	0.256518	0.492807	7.59625	3.04835e-14	8.4668e-08	BTG2;CCND1;CHAF1A;RB1
82	btg family proteins and cell cycle regulation	miRNA	hsa-miR-20a-5p	9	8	5	0.256518	0.492807	9.62544	6.24391e-22	1.73425e-15	BTG1;BTG2;CCND1;CHAF1A;RB1
83	btg family proteins and cell cycle regulation	miRNA	hsa-miR-98	9	8	4	0.256518	0.492807	7.59625	3.04835e-14	8.4668e-08	BTG2;CCND1;RB1;TP53
84	cadmium induces dna synthesis and proliferation in macrophages	miRNA	hsa-miR-19a-3p	16	12	5	0.5164	0.673312	6.65903	2.75641e-11	7.65594e-05	MAPK1;PLCB1;PRKCA;PRKCB;RAF1
85	cadmium induces dna synthesis and proliferation in macrophages	miRNA	hsa-miR-548d-3p	16	12	5	0.5164	0.673312	6.65903	2.75641e-11	7.65594e-05	FOS;MYC;PLCB1;PRKCB;RAF1
86	carm1 and regulation of the estrogen receptor	miRNA	hsa-miR-3613-3p	12	10	6	0.736753	0.795744	6.61425	3.7344e-11	0.000103723	CREBBP;EP300;ESR1;MEF2C;NR3C1;POLR2A
87	caspase cascade in apoptosis	miRNA	hsa-miR-19b-2-5p	23	9	3	0.123633	0.346273	8.30665	9.84418e-17	2.73422e-10	APAF1;SREBF1;XIAP
88	caspase cascade in apoptosis	miRNA	hsa-miR-23a-3p	23	9	3	0.123633	0.346273	8.30665	9.84418e-17	2.73422e-10	CASP7;LMNB1;XIAP
89	caspase cascade in apoptosis	miRNA	hsa-miR-548o-3p	23	9	3	0.123633	0.346273	8.30665	9.84418e-17	2.73422e-10	LMNB1;PARP1;SREBF1
90	cbl mediated ligand-induced downregulation of egf receptors pathway	miRNA	hsa-miR-141-3p	8	6	3	0.19344	0.426965	6.57328	4.92188e-11	0.000136705	GRB2;PRKCB;SRC
91	cbl mediated ligand-induced downregulation of egf receptors pathway	miRNA	hsa-miR-19a-3p	8	6	3	0.19344	0.426965	6.57328	4.92188e-11	0.000136705	PRKCA;PRKCB;SH3KBP1
92	cbl mediated ligand-induced downregulation of egf receptors pathway	miRNA	hsa-miR-33a-5p	8	6	3	0.19344	0.426965	6.57328	4.92188e-11	0.000136705	PRKCB;SH3KBP1;SRC
93	cbl mediated ligand-induced downregulation of egf receptors pathway	miRNA	hsa-miR-664-3p	8	6	3	0.19344	0.426965	6.57328	4.92188e-11	0.000136705	GRB2;PRKCA;PRKCB
94	ccr3 signaling in eosinophils	miRNA	hsa-miR-19a-3p	23	14	6	0.804037	0.848698	6.12228	9.22457e-10	0.00256213	GNB1;MAPK1;PLCB1;PRKCA;PRKCB;RAF1
95	ccr3 signaling in eosinophils	miRNA	hsa-miR-2115-3p	23	14	6	0.804037	0.848698	6.12228	9.22457e-10	0.00256213	GNB1;MAP2K1;PLCB1;PRKCB;RHOA;ROCK2
96	ccr3 signaling in eosinophils	miRNA	hsa-miR-3609	23	14	6	0.804037	0.848698	6.12228	9.22457e-10	0.00256213	GNAQ;LIMK1;MAP2K1;PLCB1;PTK2;RHOA
97	ccr3 signaling in eosinophils	miRNA	hsa-miR-7-5p	23	14	6	0.804037	0.848698	6.12228	9.22457e-10	0.00256213	GNB1;PLCB1;PRKCB;PTK2;RAF1;ROCK2
98	cdk regulation of dna replication	miRNA	hsa-miR-205-3p	18	7	3	0.202691	0.441168	6.34068	2.28753e-10	0.000635362	CDKN1B;KITLG;ORC5
99	cdk regulation of dna replication	miRNA	hsa-miR-30d-3p	18	7	3	0.202691	0.441168	6.34068	2.28753e-10	0.000635362	CDKN1B;KITLG;ORC5
100	cell cycle: g1/s check point	miRNA	hsa-miR-106a-5p	25	20	8	0.708158	0.810401	8.99782	2.30244e-19	6.39504e-13	CCND1;CDC25A;CDK6;CDKN1A;E2F1;RB1;SMAD4;TFDP1
101	cell cycle: g1/s check point	miRNA	hsa-miR-106b-5p	25	20	9	0.708158	0.810401	10.2318	1.42839e-24	3.96736e-18	ABL1;CCND1;CDC25A;CDK6;CDKN1A;E2F1;RB1;SMAD4;TFDP1
102	cell cycle: g1/s check point	miRNA	hsa-miR-15b-5p	25	20	6	0.708158	0.810401	6.5299	6.58136e-11	0.000182798	CCND1;CCNE1;CDC25A;CDK6;CDKN2A;CDKN2B
103	cell cycle: g1/s check point	miRNA	hsa-miR-16-5p	25	20	6	0.708158	0.810401	6.5299	6.58136e-11	0.000182798	CCND1;CCNE1;CDC25A;CDK6;CDKN2A;CDKN2B
104	cell cycle: g1/s check point	miRNA	hsa-miR-17-5p	25	20	7	0.708158	0.810401	7.76386	8.23828e-15	2.28819e-08	CCND1;CDC25A;CDKN1A;E2F1;RB1;SMAD4;TFDP1
105	cell cycle: g1/s check point	miRNA	hsa-miR-20a-5p	25	20	8	0.708158	0.810401	8.99782	2.30244e-19	6.39504e-13	CCND1;CDC25A;CDK6;CDKN1A;E2F1;RB1;SMAD4;TFDP1
106	cell cycle: g2/m checkpoint	miRNA	hsa-miR-130b-3p	21	14	5	0.462574	0.651607	6.96344	3.32063e-12	9.22306e-06	CDKN1A;GADD45A;MYT1;PI4KA;WEE1
107	cell cycle: g2/m checkpoint	miRNA	hsa-miR-454-3p	21	14	5	0.462574	0.651607	6.96344	3.32063e-12	9.22306e-06	CDKN1A;GADD45A;MYT1;PI4KA;WEE1
108	cell to cell adhesion signaling	miRNA	hsa-miR-3662	8	7	3	0.15307	0.383139	7.43054	1.08155e-13	3.00401e-07	ACTA1;CSK;PTPN11
109	cell to cell adhesion signaling	miRNA	hsa-miR-548c-3p	8	7	3	0.15307	0.383139	7.43054	1.08155e-13	3.00401e-07	CSK;PECAM1;PTK2
110	ceramide signaling pathway	miRNA	hsa-miR-130a-5p	33	20	6	0.706476	0.800532	6.61251	3.77858e-11	0.00010495	BCL2;CHUK;MADD;MAP2K4;MAP3K1;MAP4K4
111	ceramide signaling pathway	miRNA	hsa-miR-15a-5p	33	20	6	0.706476	0.800532	6.61251	3.77858e-11	0.00010495	AIFM1;BAG4;BCL2;IKBKB;MAP2K1;RAF1
112	ceramide signaling pathway	miRNA	hsa-miR-30d-5p	33	20	6	0.706476	0.800532	6.61251	3.77858e-11	0.00010495	BAG4;BCL2;KSR1;MAP2K4;MAP3K1;MAP4K4
113	chrebp regulation by carbohydrates and camp	miRNA	hsa-miR-130a-3p	40	22	8	0.803196	0.867782	8.29333	1.10121e-16	3.05862e-10	CXCL12;CXCR4;EDN1;GNB1;HTR2C;PRKAA1;PRKAA2;PRKACB
114	chrebp regulation by carbohydrates and camp	miRNA	hsa-miR-130b-3p	40	22	6	0.803196	0.867782	5.98861	2.11642e-09	0.00587837	CXCL12;EDN1;HTR2C;PRKAA1;PRKAA2;PRKACB
115	chrebp regulation by carbohydrates and camp	miRNA	hsa-miR-137	40	22	6	0.803196	0.867782	5.98861	2.11642e-09	0.00587837	ADCY1;CXCL12;GNB1;PRKAA1;PRKAB2;PRKAR2B
116	chrebp regulation by carbohydrates and camp	miRNA	hsa-miR-203	40	22	6	0.803196	0.867782	5.98861	2.11642e-09	0.00587837	CXCL12;EDN1;EDNRA;HTR2C;PRKACB;PRKAG2
117	chrebp regulation by carbohydrates and camp	miRNA	hsa-miR-224-5p	40	22	6	0.803196	0.867782	5.98861	2.11642e-09	0.00587837	ADRA1B;CXCR4;EDNRA;EDNRB;PRKAA1;PRKACB
118	chrebp regulation by carbohydrates and camp	miRNA	hsa-miR-301b	40	22	7	0.803196	0.867782	7.14097	9.26746e-13	2.57404e-06	CXCL12;EDN1;GNB1;HTR2C;PRKAA1;PRKAA2;PRKACB
119	chrebp regulation by carbohydrates and camp	miRNA	hsa-miR-30e-3p	40	22	6	0.803196	0.867782	5.98861	2.11642e-09	0.00587837	EDN1;HTR2C;PRKAA1;PRKAA2;PRKACB;PRKAG2
120	chrebp regulation by carbohydrates and camp	miRNA	hsa-miR-381	40	22	6	0.803196	0.867782	5.98861	2.11642e-09	0.00587837	ADRA1B;ADRB2;CXCL12;CXCR4;GNB1;PRKACB
121	chrebp regulation by carbohydrates and camp	miRNA	hsa-miR-429	40	22	6	0.803196	0.867782	5.98861	2.11642e-09	0.00587837	ADRB2;CXCL12;PRKACB;PRKAG2;PRKAR1A;PRKAR2B
122	control of skeletal myogenesis by hdac and calcium/calmodulin-dependent kinase (camk)	miRNA	hsa-miR-9-3p	15	9	6	0.643397	0.74769	7.1642	7.82421e-13	2.17318e-06	MEF2A;MEF2C;PDPK1;PIK3CA;PIK3R1;YWHAH
123	cyclins and cell cycle regulation	miRNA	hsa-let-7f-5p	23	21	5	0.571909	0.738141	5.99897	1.98573e-09	0.00551537	CCND1;CCND2;CDC25A;CDK6;RB1
124	cyclins and cell cycle regulation	miRNA	hsa-miR-106a-5p	23	21	8	0.571909	0.738141	10.0632	8.03435e-24	2.23154e-17	CCND1;CCND2;CDC25A;CDK6;CDKN1A;E2F1;RB1;TFDP1
125	cyclins and cell cycle regulation	miRNA	hsa-miR-106b-5p	23	21	8	0.571909	0.738141	10.0632	8.03435e-24	2.23154e-17	CCND1;CCND2;CDC25A;CDK6;CDKN1A;E2F1;RB1;TFDP1
126	cyclins and cell cycle regulation	miRNA	hsa-miR-15b-5p	23	21	8	0.571909	0.738141	10.0632	8.03435e-24	2.23154e-17	CCND1;CCND2;CCND3;CCNE1;CDC25A;CDK6;CDKN2A;CDKN2B
127	cyclins and cell cycle regulation	miRNA	hsa-miR-16-5p	23	21	8	0.571909	0.738141	10.0632	8.03435e-24	2.23154e-17	CCND1;CCND2;CCND3;CCNE1;CDC25A;CDK6;CDKN2A;CDKN2B
128	cyclins and cell cycle regulation	miRNA	hsa-miR-17-5p	23	21	7	0.571909	0.738141	8.70848	3.07977e-18	8.55407e-12	CCND1;CDC25A;CDKN1A;E2F1;RB1;RBL1;TFDP1
129	cyclins and cell cycle regulation	miRNA	hsa-miR-195-5p	23	21	7	0.571909	0.738141	8.70848	3.07977e-18	8.55407e-12	CCND1;CCND2;CCND3;CCNE1;CDC25A;CDKN2A;CDKN2B
130	cyclins and cell cycle regulation	miRNA	hsa-miR-20a-5p	23	21	8	0.571909	0.738141	10.0632	8.03435e-24	2.23154e-17	CCND1;CCND2;CDC25A;CDK6;CDKN1A;E2F1;RB1;TFDP1
131	cyclins and cell cycle regulation	miRNA	hsa-miR-20b-5p	23	21	6	0.571909	0.738141	7.35373	1.92751e-13	5.35367e-07	CCND1;CDC25A;CDKN1A;E2F1;RB1;RBL1
132	cyclins and cell cycle regulation	miRNA	hsa-miR-302b-3p	23	21	5	0.571909	0.738141	5.99897	1.98573e-09	0.00551537	CCND1;CDC25A;CDK2;E2F1;RBL1
133	cyclins and cell cycle regulation	miRNA	hsa-miR-424-5p	23	21	7	0.571909	0.738141	8.70848	3.07977e-18	8.55407e-12	CCND1;CCND2;CCND3;CCNE1;CDC25A;CDK6;CDKN2B
134	cyclins and cell cycle regulation	miRNA	hsa-miR-497-5p	23	21	5	0.571909	0.738141	5.99897	1.98573e-09	0.00551537	CCND1;CCND2;CCND3;CCNE1;CDC25A
135	cyclins and cell cycle regulation	miRNA	hsa-miR-526b-3p	23	21	6	0.571909	0.738141	7.35373	1.92751e-13	5.35367e-07	CCND1;CDC25A;CDKN1A;E2F1;RB1;RBL1
136	cyclins and cell cycle regulation	miRNA	hsa-miR-548d-3p	23	21	5	0.571909	0.738141	5.99897	1.98573e-09	0.00551537	CCND1;CDKN1B;CDKN2C;CDKN2D;TFDP1
137	cyclins and cell cycle regulation	miRNA	hsa-miR-93-5p	23	21	5	0.571909	0.738141	5.99897	1.98573e-09	0.00551537	CCND1;CDC25A;CDKN1A;E2F1;RB1
138	cystic fibrosis transmembrane conductance regulator (cftr) and beta 2 adrenergic receptor (b2ar) pathway	miRNA	hsa-miR-429	20	12	5	0.519765	0.695355	6.44309	1.17065e-10	0.000325149	ADRB2;CXCL12;PRKACB;PRKAR1A;PRKAR2B
139	double stranded rna induced gene expression	miRNA	hsa-let-7a-3p	15	9	3	0.201009	0.436653	6.41011	1.45415e-10	0.000403891	EIF2S1;MAP4K4;NFKBIA
140	double stranded rna induced gene expression	miRNA	hsa-let-7a-5p	15	9	3	0.201009	0.436653	6.41011	1.45415e-10	0.000403891	EIF2S2;MAP4K4;TP53
141	double stranded rna induced gene expression	miRNA	hsa-let-7b-3p	15	9	3	0.201009	0.436653	6.41011	1.45415e-10	0.000403891	EIF2S1;MAP4K4;NFKBIA
142	double stranded rna induced gene expression	miRNA	hsa-let-7c	15	9	3	0.201009	0.436653	6.41011	1.45415e-10	0.000403891	EIF2S2;MAP4K4;TP53
143	double stranded rna induced gene expression	miRNA	hsa-let-7d-5p	15	9	3	0.201009	0.436653	6.41011	1.45415e-10	0.000403891	EIF2S2;MAP4K4;TP53
144	double stranded rna induced gene expression	miRNA	hsa-let-7f-1-3p	15	9	3	0.201009	0.436653	6.41011	1.45415e-10	0.000403891	EIF2S1;MAP4K4;NFKBIA
145	double stranded rna induced gene expression	miRNA	hsa-let-7f-5p	15	9	3	0.201009	0.436653	6.41011	1.45415e-10	0.000403891	EIF2S2;MAP4K4;TP53
146	double stranded rna induced gene expression	miRNA	hsa-let-7g-5p	15	9	3	0.201009	0.436653	6.41011	1.45415e-10	0.000403891	EIF2S2;MAP4K4;TP53
147	double stranded rna induced gene expression	miRNA	hsa-let-7i-5p	15	9	3	0.201009	0.436653	6.41011	1.45415e-10	0.000403891	EIF2S2;MAP4K4;TP53
148	double stranded rna induced gene expression	miRNA	hsa-miR-200b-3p	15	9	3	0.201009	0.436653	6.41011	1.45415e-10	0.000403891	DNAJC3;IKBKB;MAP4K4
149	double stranded rna induced gene expression	miRNA	hsa-miR-200c-3p	15	9	3	0.201009	0.436653	6.41011	1.45415e-10	0.000403891	DNAJC3;IKBKB;MAP4K4
150	double stranded rna induced gene expression	miRNA	hsa-miR-369-3p	15	9	3	0.201009	0.436653	6.41011	1.45415e-10	0.000403891	EIF2S2;IKBKB;MAP4K4
151	double stranded rna induced gene expression	miRNA	hsa-miR-429	15	9	4	0.201009	0.436653	8.70025	3.31154e-18	9.19782e-12	DNAJC3;EIF2S1;IKBKB;MAP4K4
152	downregulated of mta-3 in er-negative breast tumors	miRNA	hsa-miR-32-5p	21	11	3	0.216989	0.452976	6.14383	8.05551e-10	0.00223742	ESR1;MTA3;SNAI2
153	downregulated of mta-3 in er-negative breast tumors	miRNA	hsa-miR-381	21	11	3	0.216989	0.452976	6.14383	8.05551e-10	0.00223742	ESR1;GREB1;SNAI2
154	downregulated of mta-3 in er-negative breast tumors	miRNA	hsa-miR-524-5p	21	11	3	0.216989	0.452976	6.14383	8.05551e-10	0.00223742	GREB1;HDAC1;SNAI2
155	effects of calcineurin in keratinocyte differentiation	miRNA	hsa-miR-105-5p	13	12	6	0.781328	0.83472	6.25201	4.05203e-10	0.00112545	MARCKS;PPP3CA;PPP3CB;PRKCB;SP1;SP3
156	egf signaling pathway	miRNA	hsa-miR-30e-5p	20	16	7	0.914213	0.905926	6.71775	1.84552e-11	5.12594e-05	JAK1;MAP2K4;MAP3K1;PLCG1;PRKCB;RASA1;SOS1
157	eicosanoid metabolism	miRNA	hsa-miR-27a-3p	22	5	3	0.252313	0.452856	6.06746	1.29949e-09	0.00360934	PLCB1;PTGER3;PTGFR
158	epo signaling pathway	miRNA	hsa-miR-9-5p	11	6	3	0.179983	0.410079	6.87677	6.12248e-12	1.70052e-05	JAK2;SHC1;SOS1
159	erk and pi-3 kinase are necessary for collagen binding in corneal epithelia	miRNA	hsa-miR-3662	31	27	7	0.97561	0.952095	6.32751	2.49149e-10	0.000692012	ACTA1;ACTN1;CSK;ITGB1;PIK3R1;RHOA;VCL
160	erk and pi-3 kinase are necessary for collagen binding in corneal epithelia	miRNA	hsa-miR-506-3p	31	27	7	0.97561	0.952095	6.32751	2.49149e-10	0.000692012	DIAPH1;GSN;ITGB1;MAPK1;PIK3CA;ROCK1;TLN1
161	erk1/erk2 mapk signaling pathway	miRNA	hsa-miR-106a-5p	22	18	6	0.481076	0.675564	8.16935	3.10055e-16	8.61179e-10	MAP2K1;MKNK2;RPS6KA1;RPS6KA5;SRC;STAT3
162	erk1/erk2 mapk signaling pathway	miRNA	hsa-miR-106b-5p	22	18	5	0.481076	0.675564	6.68911	2.24532e-11	6.23639e-05	MAPK1;MKNK2;RPS6KA1;RPS6KA5;STAT3
163	erk1/erk2 mapk signaling pathway	miRNA	hsa-miR-128	22	18	5	0.481076	0.675564	6.68911	2.24532e-11	6.23639e-05	GRB2;MKNK2;NGFR;RPS6KA5;SOS1
164	erk1/erk2 mapk signaling pathway	miRNA	hsa-miR-15a-5p	22	18	5	0.481076	0.675564	6.68911	2.24532e-11	6.23639e-05	MAP2K1;MKNK1;PTPRR;RAF1;SOS1
165	erk1/erk2 mapk signaling pathway	miRNA	hsa-miR-15b-5p	22	18	5	0.481076	0.675564	6.68911	2.24532e-11	6.23639e-05	MAP2K1;MKNK1;PTPRR;RAF1;SOS1
166	erk1/erk2 mapk signaling pathway	miRNA	hsa-miR-16-5p	22	18	5	0.481076	0.675564	6.68911	2.24532e-11	6.23639e-05	MAP2K1;MKNK1;PTPRR;RAF1;SOS1
167	erk1/erk2 mapk signaling pathway	miRNA	hsa-miR-17-5p	22	18	5	0.481076	0.675564	6.68911	2.24532e-11	6.23639e-05	MAP2K1;MKNK2;MYC;RPS6KA5;STAT3
168	erk1/erk2 mapk signaling pathway	miRNA	hsa-miR-20a-5p	22	18	6	0.481076	0.675564	8.16935	3.10055e-16	8.61179e-10	MKNK2;MYC;RPS6KA1;RPS6KA5;SOS1;STAT3
169	erk1/erk2 mapk signaling pathway	miRNA	hsa-miR-548k	22	18	6	0.481076	0.675564	8.16935	3.10055e-16	8.61179e-10	MAP2K1;MAPK1;PTPRR;RPS6KA5;SOS1;STAT3
170	erk1/erk2 mapk signaling pathway	miRNA	hsa-miR-548l	22	18	6	0.481076	0.675564	8.16935	3.10055e-16	8.61179e-10	MAPK1;PTPRR;RPS6KA5;SOS1;SRC;STAT3
171	erk1/erk2 mapk signaling pathway	miRNA	hsa-miR-93-5p	22	18	5	0.481076	0.675564	6.68911	2.24532e-11	6.23639e-05	MAP2K1;MKNK2;RPS6KA1;RPS6KA5;STAT3
172	erythropoietin mediated neuroprotection through nf-kb	miRNA	hsa-miR-548e	13	10	5	0.519765	0.677021	6.61757	3.65151e-11	0.000101421	CREB1;EP300;HIF1A;JAK2;NFKBIA
173	erythropoietin mediated neuroprotection through nf-kb	miRNA	hsa-miR-548f	13	10	5	0.519765	0.677021	6.61757	3.65151e-11	0.000101421	CREB1;EP300;HIF1A;JAK2;NFKBIA
174	eukaryotic protein translation	miRNA	hsa-let-7a-3p	15	13	5	0.591253	0.735523	5.99403	2.04704e-09	0.00568566	EIF1;EIF2S1;EIF4A1;EIF4A2;EIF4G3
175	eukaryotic protein translation	miRNA	hsa-let-7b-3p	15	13	5	0.591253	0.735523	5.99403	2.04704e-09	0.00568566	EIF2S1;EIF4A1;EIF4A2;EIF4G3;EIF5B
176	eukaryotic protein translation	miRNA	hsa-let-7f-1-3p	15	13	6	0.591253	0.735523	7.35361	1.92924e-13	5.35847e-07	EIF1;EIF2S1;EIF4A1;EIF4A2;EIF4G3;EIF5B
177	eukaryotic protein translation	miRNA	hsa-let-7f-2-3p	15	13	5	0.591253	0.735523	5.99403	2.04704e-09	0.00568566	EIF1;EIF2S1;EIF3A;EIF4A2;EIF5B
178	eukaryotic protein translation	miRNA	hsa-miR-374b-5p	15	13	5	0.591253	0.735523	5.99403	2.04704e-09	0.00568566	EIF2S2;EIF3A;EIF4A2;EIF4G1;EIF4G2
179	eukaryotic protein translation	miRNA	hsa-miR-374c-5p	15	13	5	0.591253	0.735523	5.99403	2.04704e-09	0.00568566	EIF2S2;EIF3A;EIF4A2;EIF4E;EIF4G3
180	eukaryotic protein translation	miRNA	hsa-miR-381	15	13	5	0.591253	0.735523	5.99403	2.04704e-09	0.00568566	EIF3A;EIF4A1;EIF4A2;EIF4G2;EIF4G3
181	eukaryotic protein translation	miRNA	hsa-miR-655	15	13	5	0.591253	0.735523	5.99403	2.04704e-09	0.00568566	EIF2S2;EIF3A;EIF4A2;EIF4E;EIF4G3
182	fas signaling pathway (cd95)	miRNA	hsa-let-7a-5p	20	13	5	0.591253	0.728478	6.052	1.43058e-09	0.00397344	CASP3;FAF1;FASLG;MAP3K1;RB1
183	fas signaling pathway (cd95)	miRNA	hsa-let-7b-5p	20	13	5	0.591253	0.728478	6.052	1.43058e-09	0.00397344	CASP3;FASLG;MAP3K1;PAK1;RB1
184	fas signaling pathway (cd95)	miRNA	hsa-let-7c	20	13	6	0.591253	0.728478	7.42472	1.13019e-13	3.13911e-07	CASP3;FAF1;FASLG;MAP3K1;PAK1;RB1
185	fas signaling pathway (cd95)	miRNA	hsa-let-7d-5p	20	13	6	0.591253	0.728478	7.42472	1.13019e-13	3.13911e-07	CASP3;FAF1;FASLG;MAP3K1;PAK1;RB1
186	fas signaling pathway (cd95)	miRNA	hsa-let-7f-5p	20	13	5	0.591253	0.728478	6.052	1.43058e-09	0.00397344	CASP3;FAF1;FASLG;MAP3K1;RB1
187	fas signaling pathway (cd95)	miRNA	hsa-let-7g-5p	20	13	6	0.591253	0.728478	7.42472	1.13019e-13	3.13911e-07	CASP3;FAF1;FASLG;MAP3K1;PAK1;RB1
188	fas signaling pathway (cd95)	miRNA	hsa-let-7i-5p	20	13	5	0.591253	0.728478	6.052	1.43058e-09	0.00397344	CASP3;FAF1;FASLG;MAP3K1;RB1
189	fas signaling pathway (cd95)	miRNA	hsa-miR-202-3p	20	13	5	0.591253	0.728478	6.052	1.43058e-09	0.00397344	CASP3;FAF1;FASLG;MAP3K1;RB1
190	fas signaling pathway (cd95)	miRNA	hsa-miR-26b-5p	20	13	5	0.591253	0.728478	6.052	1.43058e-09	0.00397344	MAP3K1;MAP3K7;PAK2;PTPN13;RB1
191	fas signaling pathway (cd95)	miRNA	hsa-miR-98	20	13	6	0.591253	0.728478	7.42472	1.13019e-13	3.13911e-07	CASP3;FAF1;FASLG;MAP3K1;PAK1;RB1
192	fc epsilon receptor i signaling in mast cells	miRNA	hsa-miR-105-5p	29	19	7	0.899915	0.901977	6.76301	1.35154e-11	3.75391e-05	GRB2;MAP3K1;MAPK1;PAK2;PIK3CA;PRKCB;SOS1
193	fmlp induced chemokine gene expression in hmc-1 cells	miRNA	hsa-miR-19a-3p	30	21	8	0.894028	0.888731	7.99564	1.28903e-15	3.58029e-09	GNB1;MAP2K3;MAPK1;MAPK14;PLCB1;PRKCA;PRKCB;RAF1
194	fmlp induced chemokine gene expression in hmc-1 cells	miRNA	hsa-miR-493-5p	30	21	7	0.894028	0.888731	6.87044	6.40042e-12	1.77772e-05	CAMKK2;GNB1;NFKBIA;PLCB1;PPP3CA;PPP3CB;PRKCA
195	gamma-aminobutyric acid receptor life cycle pathway	miRNA	hsa-miR-16-2-3p	15	11	5	0.444071	0.631471	7.21479	5.40173e-13	1.50033e-06	GABRA1;GABRA5;NSF;UBE3A;UBQLN1
196	gata3 participate in activating the th2 cytokine genes expression	miRNA	hsa-miR-30e-5p	19	16	5	0.456686	0.651712	6.97135	3.13914e-12	8.71897e-06	IL1A;JUNB;MAF;MAP2K6;PRKAR1A
197	hiv-1 nef: negative effector of fas and tnf	miRNA	hsa-miR-548e	53	30	7	0.841884	0.880259	6.9958	2.6375e-12	7.32567e-06	BAG4;CRADD;DAXX;MAP3K1;NFKBIA;PTK2;RASA1
198	how does salmonella hijack a cell	miRNA	hsa-miR-224-3p	11	9	5	0.576955	0.716729	6.17115	6.77951e-10	0.00188301	ACTR2;ACTR3;CDC42;RAC1;WASL
199	how does salmonella hijack a cell	miRNA	hsa-miR-522-3p	11	9	5	0.576955	0.716729	6.17115	6.77951e-10	0.00188301	ACTR2;ACTR3;CDC42;RAC1;WASL
200	how progesterone initiates the oocyte maturation	miRNA	hsa-miR-206	23	16	5	0.53238	0.705606	6.33161	2.42616e-10	0.000673867	CAP1;GNB1;MAPK1;MAPK3;PRKACB
201	how progesterone initiates the oocyte maturation	miRNA	hsa-miR-543	23	16	6	0.53238	0.705606	7.74883	9.27431e-15	2.57594e-08	CDK1;GNAI1;GNB1;MAPK1;PRKACB;PRKAR2B
202	how progesterone initiates the oocyte maturation	miRNA	hsa-miR-9-5p	23	16	6	0.53238	0.705606	7.74883	9.27431e-15	2.57594e-08	CAP1;GNAI1;GNB1;PRKAR1A;PRKAR2B;SRC
203	human cytomegalovirus and map kinase pathways	miRNA	hsa-miR-106b-5p	16	14	6	0.775441	0.835346	6.25436	3.99149e-10	0.00110864	CREB1;MAP3K1;MAPK1;PIK3R1;RB1;SP1
204	hypoxia-inducible factor in the cardivascular system	miRNA	hsa-miR-495	16	12	6	0.715728	0.799115	6.61266	3.77475e-11	0.000104844	EDN1;EP300;HIF1A;HSP90AA1;JUN;VEGFA
205	il 2 signaling pathway	miRNA	hsa-miR-3149	14	6	3	0.178301	0.407686	6.92125	4.47676e-12	1.24342e-05	GRB2;JAK1;SOS1
206	il 6 signaling pathway	miRNA	hsa-miR-20a-5p	13	10	4	0.293524	0.52743	7.02743	2.10372e-12	5.84309e-06	CEBPB;JAK1;SOS1;STAT3
207	il-10 anti-inflammatory signaling pathway	miRNA	hsa-miR-23a-3p	14	7	3	0.174096	0.40875	6.91352	4.72773e-12	1.31313e-05	JAK1;MAP3K5;MAPK14
208	il-10 anti-inflammatory signaling pathway	miRNA	hsa-miR-23c	14	7	3	0.174096	0.40875	6.91352	4.72773e-12	1.31313e-05	JAK1;MAP3K5;MAPK14
209	il-10 anti-inflammatory signaling pathway	miRNA	hsa-miR-30a-5p	14	7	3	0.174096	0.40875	6.91352	4.72773e-12	1.31313e-05	IL1A;JAK1;MAP3K5
210	il-10 anti-inflammatory signaling pathway	miRNA	hsa-miR-30b-5p	14	7	3	0.174096	0.40875	6.91352	4.72773e-12	1.31313e-05	IL1A;JAK1;MAP3K5
211	il-10 anti-inflammatory signaling pathway	miRNA	hsa-miR-30d-5p	14	7	3	0.174096	0.40875	6.91352	4.72773e-12	1.31313e-05	IL1A;JAK1;MAP3K5
212	il-10 anti-inflammatory signaling pathway	miRNA	hsa-miR-30e-5p	14	7	4	0.174096	0.40875	9.36	7.97367e-21	2.21469e-14	IL1A;JAK1;MAP2K6;MAP3K5
213	il-2 receptor beta chain in t cell activation	miRNA	hsa-miR-106a-5p	47	31	9	1.28175	1.09175	7.06961	1.5537e-12	4.31541e-06	CCND1;CCND2;E2F1;JAK1;MAP2K1;PIK3R1;RB1;SOCS3;TFDP1
214	il-2 receptor beta chain in t cell activation	miRNA	hsa-miR-106b-5p	47	31	9	1.28175	1.09175	7.06961	1.5537e-12	4.31541e-06	CCND1;CCND2;E2F1;JAK1;MAPK1;PIK3R1;RB1;SOCS3;TFDP1
215	il-2 receptor beta chain in t cell activation	miRNA	hsa-miR-148b-3p	47	31	8	1.28175	1.09175	6.15365	7.57197e-10	0.00210312	E2F1;FOS;IRS1;PDPK1;PIK3CA;PIK3R1;RPS6KB1;SOS1
216	il-2 receptor beta chain in t cell activation	miRNA	hsa-miR-15a-5p	47	31	10	1.28175	1.09175	7.98557	1.39874e-15	3.88501e-09	BCL2;CCND1;CCND2;CCND3;CCNE1;MAP2K1;PIK3R1;RAF1;RPS6KB1;SOS1
217	il-2 receptor beta chain in t cell activation	miRNA	hsa-miR-15b-5p	47	31	9	1.28175	1.09175	7.06961	1.5537e-12	4.31541e-06	BCL2;CCND1;CCND2;CCND3;CCNE1;MAP2K1;RAF1;RPS6KB1;SOS1
218	il-2 receptor beta chain in t cell activation	miRNA	hsa-miR-16-5p	47	31	10	1.28175	1.09175	7.98557	1.39874e-15	3.88501e-09	BCL2;CCND1;CCND2;CCND3;CCNE1;MAP2K1;PIK3R1;RAF1;RPS6KB1;SOS1
219	il-2 receptor beta chain in t cell activation	miRNA	hsa-miR-17-5p	47	31	8	1.28175	1.09175	6.15365	7.57197e-10	0.00210312	CCND1;E2F1;JAK1;MAP2K1;PIK3R1;RB1;SOCS3;TFDP1
220	il-2 receptor beta chain in t cell activation	miRNA	hsa-miR-195-5p	47	31	10	1.28175	1.09175	7.98557	1.39874e-15	3.88501e-09	BCL2;CCND1;CCND2;CCND3;CCNE1;MAP2K1;PIK3R1;RAF1;RPS6KB1;SOS1
221	il-2 receptor beta chain in t cell activation	miRNA	hsa-miR-20a-5p	47	31	9	1.28175	1.09175	7.06961	1.5537e-12	4.31541e-06	CCND1;CCND2;E2F1;JAK1;PIK3R1;RB1;SOCS3;SOS1;TFDP1
222	il-2 receptor beta chain in t cell activation	miRNA	hsa-miR-30a-5p	47	31	8	1.28175	1.09175	6.15365	7.57197e-10	0.00210312	BCL2;CRKL;IRS1;JAK1;RPS6KB1;SOCS1;SOS1;TFDP1
223	il-2 receptor beta chain in t cell activation	miRNA	hsa-miR-30b-5p	47	31	9	1.28175	1.09175	7.06961	1.5537e-12	4.31541e-06	BCL2;CRKL;IRS1;JAK1;RPS6KB1;SOCS1;SOCS3;SOS1;TFDP1
224	il-2 receptor beta chain in t cell activation	miRNA	hsa-miR-30e-5p	47	31	9	1.28175	1.09175	7.06961	1.5537e-12	4.31541e-06	BCL2;CRKL;IRS1;JAK1;RPS6KB1;SOCS1;SOCS3;SOS1;TFDP1
225	il-2 receptor beta chain in t cell activation	miRNA	hsa-miR-3163	47	31	9	1.28175	1.09175	7.06961	1.5537e-12	4.31541e-06	BCL2;CCND2;FOS;MAPK1;RB1;RPS6KB1;SOCS1;STAT5B;TFDP1
226	il-2 receptor beta chain in t cell activation	miRNA	hsa-miR-374c-5p	47	31	8	1.28175	1.09175	6.15365	7.57197e-10	0.00210312	BCL2;CCND1;CRKL;IRS1;MAPK1;PDPK1;PIK3R1;RPS6KB1
227	il-2 receptor beta chain in t cell activation	miRNA	hsa-miR-424-5p	47	31	10	1.28175	1.09175	7.98557	1.39874e-15	3.88501e-09	BCL2;CCND1;CCND2;CCND3;CCNE1;MAP2K1;PIK3R1;RAF1;RPS6KB1;SOS1
228	il-2 receptor beta chain in t cell activation	miRNA	hsa-miR-497-5p	47	31	8	1.28175	1.09175	6.15365	7.57197e-10	0.00210312	CCND1;CCND2;CCND3;CCNE1;MAP2K1;RAF1;RPS6KB1;SOS1
229	il-2 receptor beta chain in t cell activation	miRNA	hsa-miR-655	47	31	9	1.28175	1.09175	7.06961	1.5537e-12	4.31541e-06	BCL2;CCND1;CRKL;IRS1;MAPK1;PDPK1;PIK3R1;RPS6KB1;SHC1
230	il-2 receptor beta chain in t cell activation	miRNA	hsa-miR-7-5p	47	31	8	1.28175	1.09175	6.15365	7.57197e-10	0.00210312	CCND2;FOS;IRS1;PDPK1;RAF1;RB1;RPS6KB1;TFDP1
231	il-2 receptor beta chain in t cell activation	miRNA	hsa-miR-9-3p	47	31	8	1.28175	1.09175	6.15365	7.57197e-10	0.00210312	CCND2;E2F1;PDPK1;PIK3CA;PIK3R1;RB1;RPS6KB1;SOCS1
232	il22 soluble receptor signaling pathway	miRNA	hsa-miR-106a-5p	11	5	3	0.095038	0.304611	9.53663	1.47549e-21	4.09818e-15	JAK1;SOCS3;STAT3
233	il22 soluble receptor signaling pathway	miRNA	hsa-miR-106b-5p	11	5	3	0.095038	0.304611	9.53663	1.47549e-21	4.09818e-15	JAK1;SOCS3;STAT3
234	il22 soluble receptor signaling pathway	miRNA	hsa-miR-17-5p	11	5	3	0.095038	0.304611	9.53663	1.47549e-21	4.09818e-15	JAK1;SOCS3;STAT3
235	il22 soluble receptor signaling pathway	miRNA	hsa-miR-181c-5p	11	5	2	0.095038	0.304611	6.25375	4.00712e-10	0.00111298	SOCS3;STAT3
236	il22 soluble receptor signaling pathway	miRNA	hsa-miR-20a-5p	11	5	3	0.095038	0.304611	9.53663	1.47549e-21	4.09818e-15	JAK1;SOCS3;STAT3
237	il22 soluble receptor signaling pathway	miRNA	hsa-miR-20b-5p	11	5	2	0.095038	0.304611	6.25375	4.00712e-10	0.00111298	JAK1;STAT3
238	il22 soluble receptor signaling pathway	miRNA	hsa-miR-23a-3p	11	5	2	0.095038	0.304611	6.25375	4.00712e-10	0.00111298	JAK1;STAT5B
239	il22 soluble receptor signaling pathway	miRNA	hsa-miR-30b-5p	11	5	2	0.095038	0.304611	6.25375	4.00712e-10	0.00111298	JAK1;SOCS3
240	il22 soluble receptor signaling pathway	miRNA	hsa-miR-30d-5p	11	5	2	0.095038	0.304611	6.25375	4.00712e-10	0.00111298	JAK1;SOCS3
241	il22 soluble receptor signaling pathway	miRNA	hsa-miR-30e-5p	11	5	2	0.095038	0.304611	6.25375	4.00712e-10	0.00111298	JAK1;SOCS3
242	il22 soluble receptor signaling pathway	miRNA	hsa-miR-340-5p	11	5	2	0.095038	0.304611	6.25375	4.00712e-10	0.00111298	SOCS3;STAT5B
243	il22 soluble receptor signaling pathway	miRNA	hsa-miR-518a-5p	11	5	2	0.095038	0.304611	6.25375	4.00712e-10	0.00111298	SOCS3;STAT1
244	il22 soluble receptor signaling pathway	miRNA	hsa-miR-526b-3p	11	5	2	0.095038	0.304611	6.25375	4.00712e-10	0.00111298	JAK1;STAT3
245	il22 soluble receptor signaling pathway	miRNA	hsa-miR-527	11	5	2	0.095038	0.304611	6.25375	4.00712e-10	0.00111298	SOCS3;STAT1
246	il22 soluble receptor signaling pathway	miRNA	hsa-miR-548k	11	5	2	0.095038	0.304611	6.25375	4.00712e-10	0.00111298	STAT3;STAT5B
247	il22 soluble receptor signaling pathway	miRNA	hsa-miR-548l	11	5	2	0.095038	0.304611	6.25375	4.00712e-10	0.00111298	STAT3;STAT5B
248	il22 soluble receptor signaling pathway	miRNA	hsa-miR-93-5p	11	5	2	0.095038	0.304611	6.25375	4.00712e-10	0.00111298	JAK1;STAT3
249	inactivation of gsk3 by akt causes accumulation of b-catenin in alveolar macrophages	miRNA	hsa-miR-16-5p	40	25	8	1.17662	1.03657	6.58266	4.62105e-11	0.00012835	BTRC;CCND1;DVL1;IKBKB;LRP6;NKD1;PIK3R1;WIF1
250	inactivation of gsk3 by akt causes accumulation of b-catenin in alveolar macrophages	miRNA	hsa-miR-33b-5p	40	25	8	1.17662	1.03657	6.58266	4.62105e-11	0.00012835	CAMK4;CCND1;DKK1;GJA1;GSK3B;PDPK1;PIK3R1;WIF1
251	inactivation of gsk3 by akt causes accumulation of b-catenin in alveolar macrophages	miRNA	hsa-miR-497-5p	40	25	8	1.17662	1.03657	6.58266	4.62105e-11	0.00012835	BTRC;CCND1;DKK1;DVL1;IKBKB;LRP6;NKD1;WIF1
252	induction of apoptosis through dr3 and dr4/5 death receptors	miRNA	hsa-let-7a-5p	23	8	2	0.103448	0.317974	5.96448	2.45414e-09	0.00681638	ACTA1;CASP3
253	induction of apoptosis through dr3 and dr4/5 death receptors	miRNA	hsa-let-7b-5p	23	8	2	0.103448	0.317974	5.96448	2.45414e-09	0.00681638	ACTA1;CASP3
254	induction of apoptosis through dr3 and dr4/5 death receptors	miRNA	hsa-let-7c	23	8	2	0.103448	0.317974	5.96448	2.45414e-09	0.00681638	ACTA1;CASP3
255	induction of apoptosis through dr3 and dr4/5 death receptors	miRNA	hsa-let-7d-5p	23	8	2	0.103448	0.317974	5.96448	2.45414e-09	0.00681638	ACTA1;CASP3
256	induction of apoptosis through dr3 and dr4/5 death receptors	miRNA	hsa-let-7g-5p	23	8	2	0.103448	0.317974	5.96448	2.45414e-09	0.00681638	ACTA1;CASP3
257	induction of apoptosis through dr3 and dr4/5 death receptors	miRNA	hsa-let-7i-5p	23	8	2	0.103448	0.317974	5.96448	2.45414e-09	0.00681638	ACTA1;CASP3
258	induction of apoptosis through dr3 and dr4/5 death receptors	miRNA	hsa-miR-106a-5p	23	8	2	0.103448	0.317974	5.96448	2.45414e-09	0.00681638	GAS2;MAP3K14
259	induction of apoptosis through dr3 and dr4/5 death receptors	miRNA	hsa-miR-129-5p	23	8	2	0.103448	0.317974	5.96448	2.45414e-09	0.00681638	GAS2;LMNA
260	induction of apoptosis through dr3 and dr4/5 death receptors	miRNA	hsa-miR-155-5p	23	8	2	0.103448	0.317974	5.96448	2.45414e-09	0.00681638	ACTA1;MAP3K14
261	induction of apoptosis through dr3 and dr4/5 death receptors	miRNA	hsa-miR-17-5p	23	8	2	0.103448	0.317974	5.96448	2.45414e-09	0.00681638	GAS2;MAP3K14
262	induction of apoptosis through dr3 and dr4/5 death receptors	miRNA	hsa-miR-20a-5p	23	8	2	0.103448	0.317974	5.96448	2.45414e-09	0.00681638	GAS2;MAP3K14
263	induction of apoptosis through dr3 and dr4/5 death receptors	miRNA	hsa-miR-3121-3p	23	8	2	0.103448	0.317974	5.96448	2.45414e-09	0.00681638	GAS2;PARP1
264	induction of apoptosis through dr3 and dr4/5 death receptors	miRNA	hsa-miR-372	23	8	2	0.103448	0.317974	5.96448	2.45414e-09	0.00681638	MAP3K14;PARP1
265	induction of apoptosis through dr3 and dr4/5 death receptors	miRNA	hsa-miR-3910	23	8	2	0.103448	0.317974	5.96448	2.45414e-09	0.00681638	GAS2;LMNA
266	induction of apoptosis through dr3 and dr4/5 death receptors	miRNA	hsa-miR-520a-3p	23	8	2	0.103448	0.317974	5.96448	2.45414e-09	0.00681638	GAS2;MAP3K14
267	induction of apoptosis through dr3 and dr4/5 death receptors	miRNA	hsa-miR-520h	23	8	2	0.103448	0.317974	5.96448	2.45414e-09	0.00681638	GAS2;MAP3K14
268	induction of apoptosis through dr3 and dr4/5 death receptors	miRNA	hsa-miR-548d-3p	23	8	2	0.103448	0.317974	5.96448	2.45414e-09	0.00681638	CASP3;LMNA
269	induction of apoptosis through dr3 and dr4/5 death receptors	miRNA	hsa-miR-98	23	8	2	0.103448	0.317974	5.96448	2.45414e-09	0.00681638	ACTA1;CASP3
270	influence of ras and rho proteins on g1 to s transition	miRNA	hsa-miR-106a-5p	28	24	8	0.862069	0.904266	7.89362	2.93545e-15	8.15322e-09	CCND1;CDK6;CDKN1A;E2F1;MAP2K1;PIK3R1;RB1;TFDP1
271	influence of ras and rho proteins on g1 to s transition	miRNA	hsa-miR-106b-5p	28	24	8	0.862069	0.904266	7.89362	2.93545e-15	8.15322e-09	CCND1;CDK6;CDKN1A;E2F1;MAPK1;PIK3R1;RB1;TFDP1
272	influence of ras and rho proteins on g1 to s transition	miRNA	hsa-miR-15a-5p	28	24	7	0.862069	0.904266	6.78775	1.13896e-11	3.16347e-05	CCND1;CCNE1;IKBKB;MAP2K1;PAK1;PIK3R1;RAF1
273	influence of ras and rho proteins on g1 to s transition	miRNA	hsa-miR-15b-5p	28	24	7	0.862069	0.904266	6.78775	1.13896e-11	3.16347e-05	CCND1;CCNE1;CDK6;IKBKB;MAP2K1;PAK1;RAF1
274	influence of ras and rho proteins on g1 to s transition	miRNA	hsa-miR-16-5p	28	24	8	0.862069	0.904266	7.89362	2.93545e-15	8.15322e-09	CCND1;CCNE1;CDK6;IKBKB;MAP2K1;PAK1;PIK3R1;RAF1
275	influence of ras and rho proteins on g1 to s transition	miRNA	hsa-miR-17-5p	28	24	7	0.862069	0.904266	6.78775	1.13896e-11	3.16347e-05	CCND1;CDKN1A;E2F1;MAP2K1;PIK3R1;RB1;TFDP1
276	influence of ras and rho proteins on g1 to s transition	miRNA	hsa-miR-195-5p	28	24	7	0.862069	0.904266	6.78775	1.13896e-11	3.16347e-05	CCND1;CCNE1;IKBKB;MAP2K1;PAK1;PIK3R1;RAF1
277	influence of ras and rho proteins on g1 to s transition	miRNA	hsa-miR-20a-5p	28	24	7	0.862069	0.904266	6.78775	1.13896e-11	3.16347e-05	CCND1;CDK6;CDKN1A;E2F1;PIK3R1;RB1;TFDP1
278	influence of ras and rho proteins on g1 to s transition	miRNA	hsa-miR-424-5p	28	24	8	0.862069	0.904266	7.89362	2.93545e-15	8.15322e-09	CCND1;CCNE1;CDK6;IKBKB;MAP2K1;PAK1;PIK3R1;RAF1
279	inhibition of matrix metalloproteinases	miRNA	hsa-miR-106a-5p	8	5	3	0.196804	0.429581	6.52542	6.78112e-11	0.000188346	MMP2;TIMP2;TIMP3
280	inhibition of matrix metalloproteinases	miRNA	hsa-miR-17-5p	8	5	3	0.196804	0.429581	6.52542	6.78112e-11	0.000188346	MMP2;TIMP2;TIMP3
281	inhibition of matrix metalloproteinases	miRNA	hsa-miR-221-3p	8	5	3	0.196804	0.429581	6.52542	6.78112e-11	0.000188346	RECK;TIMP2;TIMP3
282	inhibition of matrix metalloproteinases	miRNA	hsa-miR-495	8	5	3	0.196804	0.429581	6.52542	6.78112e-11	0.000188346	MMP14;TIMP2;TIMP3
283	integrin signaling pathway	miRNA	hsa-let-7a-3p	33	25	6	0.791421	0.858622	6.06621	1.30964e-09	0.00363753	CRKL;ITGB1;NOLC1;RHOA;ROCK1;VCL
284	integrin signaling pathway	miRNA	hsa-miR-124-3p	33	25	6	0.791421	0.858622	6.06621	1.30964e-09	0.00363753	ITGB1;RAPGEF1;ROCK1;SHC1;SOS1;TLN1
285	integrin signaling pathway	miRNA	hsa-miR-20a-5p	33	25	6	0.791421	0.858622	6.06621	1.30964e-09	0.00363753	ITGB1;PTK2;RAPGEF1;SOS1;TNS1;VCL
286	integrin signaling pathway	miRNA	hsa-miR-3148	33	25	6	0.791421	0.858622	6.06621	1.30964e-09	0.00363753	CRKL;FYN;PTK2;RHOA;ROCK1;VCL
287	integrin signaling pathway	miRNA	hsa-miR-3609	33	25	7	0.791421	0.858622	7.23086	4.79945e-13	1.33305e-06	ACTN1;CAV1;ITGB1;PTK2;RAPGEF1;RHOA;ROCK1
288	integrin signaling pathway	miRNA	hsa-miR-3662	33	25	8	0.791421	0.858622	8.39552	4.63837e-17	1.28831e-10	ACTA1;ACTN1;CAV1;CRKL;CSK;ITGB1;RHOA;VCL
289	integrin signaling pathway	miRNA	hsa-miR-410	33	25	6	0.791421	0.858622	6.06621	1.30964e-09	0.00363753	ACTN4;GRB2;PTK2;SOS1;TNS1;VCL
290	integrin signaling pathway	miRNA	hsa-miR-548j	33	25	6	0.791421	0.858622	6.06621	1.30964e-09	0.00363753	ACTN4;CAV1;GRB2;PTK2;RHOA;SOS1
291	integrin signaling pathway	miRNA	hsa-miR-548l	33	25	6	0.791421	0.858622	6.06621	1.30964e-09	0.00363753	ACTN4;CAV1;RHOA;SOS1;SRC;TNS1
292	integrin signaling pathway	miRNA	hsa-miR-9-5p	33	25	8	0.791421	0.858622	8.39552	4.63837e-17	1.28831e-10	ACTN2;ACTN4;ROCK1;SHC1;SOS1;SRC;TLN1;VCL
293	internal ribosome entry pathway	miRNA	hsa-miR-381	18	10	5	0.549201	0.69896	6.36775	1.91821e-10	0.000532784	EIF3A;EIF4A1;EIF4G2;EIF4G3;PTBP1
294	intrinsic prothrombin activation pathway	miRNA	hsa-miR-29a-3p	23	8	5	0.329689	0.530558	8.80265	1.33623e-18	3.71138e-12	COL4A1;COL4A2;COL4A3;COL4A4;COL4A5
295	intrinsic prothrombin activation pathway	miRNA	hsa-miR-29b-3p	23	8	6	0.329689	0.530558	10.6875	1.16468e-26	3.2349e-20	COL4A1;COL4A2;COL4A3;COL4A4;COL4A5;COL4A6
296	intrinsic prothrombin activation pathway	miRNA	hsa-miR-29c-3p	23	8	7	0.329689	0.530558	12.5723	2.99871e-36	8.32893e-30	COL4A1;COL4A2;COL4A3;COL4A4;COL4A5;COL4A6;FGA
297	ion channels and their functional role in vascular endothelium	miRNA	hsa-miR-130a-3p	44	24	6	0.76619	0.852185	6.14163	8.16789e-10	0.00226863	CXCL12;CXCR4;EDN1;GNB1;HTR2C;TRPC3
298	ion channels and their functional role in vascular endothelium	miRNA	hsa-miR-137	44	24	6	0.76619	0.852185	6.14163	8.16789e-10	0.00226863	ADCY1;CXCL12;GNB1;KCNQ5;TRPC3;TRPC4
299	ion channels and their functional role in vascular endothelium	miRNA	hsa-miR-19a-3p	44	24	6	0.76619	0.852185	6.14163	8.16789e-10	0.00226863	CXCL12;EDNRB;GNB1;KCNQ3;KCNQ5;TRPC3
300	ion channels and their functional role in vascular endothelium	miRNA	hsa-miR-203	44	24	6	0.76619	0.852185	6.14163	8.16789e-10	0.00226863	CXCL12;EDN1;EDNRA;HTR2C;KCNQ5;PRKG1
301	ion channels and their functional role in vascular endothelium	miRNA	hsa-miR-381	44	24	7	0.76619	0.852185	7.31509	2.57209e-13	7.14399e-07	ADRA1B;ADRB2;CXCL12;CXCR4;GNB1;KCNQ3;TRPC4
302	keratinocyte differentiation	miRNA	hsa-miR-101-3p	53	37	10	1.40118	1.1318	7.59749	3.0193e-14	8.38612e-08	CEBPA;DAXX;ETS1;FOS;HOXA7;MAP3K5;MAPK1;PRKCE;SOS1;SP1
303	keratinocyte differentiation	miRNA	hsa-miR-200b-3p	53	37	10	1.40118	1.1318	7.59749	3.0193e-14	8.38612e-08	ETS1;ETS2;IKBKB;MAP3K1;MAP3K5;MAP4K4;PRKCA;PRKCB;SHC1;SP1
304	keratinocyte differentiation	miRNA	hsa-miR-429	53	37	9	1.40118	1.1318	6.71394	1.89438e-11	5.26165e-05	ETS1;ETS2;IKBKB;MAP3K1;MAP3K5;MAP4K4;PRKCA;PRKCB;SHC1
305	keratinocyte differentiation	miRNA	hsa-miR-548d-3p	53	37	10	1.40118	1.1318	7.59749	3.0193e-14	8.38612e-08	CEBPA;CHUK;ETS1;FOS;GRB2;MAP2K4;MAP3K5;PRKCB;PRKCE;RAF1
306	links between pyk2 and map kinases	miRNA	hsa-miR-141-3p	26	21	6	0.837678	0.872797	5.91469	3.32501e-09	0.00923523	GRB2;MAP2K4;MAP3K1;MAPK1;PRKCB;SRC
307	links between pyk2 and map kinases	miRNA	hsa-miR-19a-3p	26	21	7	0.837678	0.872797	7.06043	1.65988e-12	4.61032e-06	MAP2K3;MAP3K1;MAPK1;MAPK14;PRKCA;PRKCB;RAF1
308	links between pyk2 and map kinases	miRNA	hsa-miR-200b-3p	26	21	7	0.837678	0.872797	7.06043	1.65988e-12	4.61032e-06	CRKL;MAP3K1;PLCG1;PRKCA;PRKCB;RAC1;SHC1
309	links between pyk2 and map kinases	miRNA	hsa-miR-200c-3p	26	21	6	0.837678	0.872797	5.91469	3.32501e-09	0.00923523	JUN;MAP3K1;PLCG1;PRKCB;RAC1;SHC1
310	links between pyk2 and map kinases	miRNA	hsa-miR-30a-5p	26	21	6	0.837678	0.872797	5.91469	3.32501e-09	0.00923523	CRKL;MAP2K4;MAP3K1;PAK1;PRKCB;SOS1
311	links between pyk2 and map kinases	miRNA	hsa-miR-30b-5p	26	21	6	0.837678	0.872797	5.91469	3.32501e-09	0.00923523	CRKL;MAP2K4;MAP3K1;PAK1;PLCG1;SOS1
312	links between pyk2 and map kinases	miRNA	hsa-miR-30e-5p	26	21	7	0.837678	0.872797	7.06043	1.65988e-12	4.61032e-06	CRKL;MAP2K4;MAP3K1;PAK1;PLCG1;PRKCB;SOS1
313	links between pyk2 and map kinases	miRNA	hsa-miR-429	26	21	7	0.837678	0.872797	7.06043	1.65988e-12	4.61032e-06	CRKL;MAP3K1;PLCG1;PRKCA;PRKCB;RAC1;SHC1
314	lissencephaly gene (lis1) in neuronal migration and development	miRNA	hsa-miR-130a-3p	19	11	5	0.544155	0.703076	6.33765	2.33296e-10	0.000647981	CDK5R1;CLIP1;LRP8;NDEL1;PAFAH1B1
315	lissencephaly gene (lis1) in neuronal migration and development	miRNA	hsa-miR-301b	19	11	5	0.544155	0.703076	6.33765	2.33296e-10	0.000647981	CLIP1;DCTN2;LRP8;NDEL1;PAFAH1B1
316	mapkinase signaling pathway	miRNA	hsa-let-7a-3p	56	46	11	2.22287	1.41517	6.20215	5.5697e-10	0.00154699	CREB1;MAP2K4;MAP3K1;MAP3K5;MAP3K8;MAP4K4;MAP4K5;MEF2A;MEF2C;MEF2D;RPS6KA1
317	mapkinase signaling pathway	miRNA	hsa-miR-101-3p	56	46	11	2.22287	1.41517	6.20215	5.5697e-10	0.00154699	CEBPA;FOS;MAP3K13;MAP3K2;MAP3K4;MAP3K5;MAP3K8;MAPK1;MEF2A;MEF2D;SP1
318	mapkinase signaling pathway	miRNA	hsa-miR-106a-5p	56	46	12	2.22287	1.41517	6.90878	4.88839e-12	1.35775e-05	CREB1;MAP2K1;MAP3K1;MAP3K11;MAP3K12;MAP3K14;MAP3K3;MAP3K5;MAP3K7;MAP3K8;MEF2C;RPS6KA1
319	mapkinase signaling pathway	miRNA	hsa-miR-106b-5p	56	46	13	2.22287	1.41517	7.6154	2.62876e-14	7.30139e-08	CREB1;MAP3K1;MAP3K11;MAP3K12;MAP3K14;MAP3K3;MAP3K5;MAP3K7;MAP3K8;MAPK1;MEF2C;RPS6KA1;SP1
320	mapkinase signaling pathway	miRNA	hsa-miR-17-5p	56	46	12	2.22287	1.41517	6.90878	4.88839e-12	1.35775e-05	CREB1;MAP2K1;MAP3K1;MAP3K11;MAP3K12;MAP3K14;MAP3K5;MAP3K7;MAP3K8;MAPK9;MEF2C;MYC
321	mapkinase signaling pathway	miRNA	hsa-miR-19a-3p	56	46	11	2.22287	1.41517	6.20215	5.5697e-10	0.00154699	MAP2K3;MAP3K1;MAP3K12;MAP3K14;MAP3K5;MAP4K3;MAPK1;MAPK14;MEF2A;MEF2C;RAF1
322	mapkinase signaling pathway	miRNA	hsa-miR-20a-5p	56	46	11	2.22287	1.41517	6.20215	5.5697e-10	0.00154699	CREB1;MAP3K1;MAP3K11;MAP3K12;MAP3K14;MAP3K3;MAP3K5;MAP3K7;MAP3K8;MYC;RPS6KA1
323	mapkinase signaling pathway	miRNA	hsa-miR-3163	56	46	13	2.22287	1.41517	7.6154	2.62876e-14	7.30139e-08	ATF2;FOS;MAP2K6;MAP3K1;MAP3K13;MAP3K2;MAP3K3;MAP3K8;MAP4K3;MAP4K5;MAPK1;MEF2A;MEF2C
324	mapkinase signaling pathway	miRNA	hsa-miR-3609	56	46	11	2.22287	1.41517	6.20215	5.5697e-10	0.00154699	ATF2;CHUK;CREB1;MAP2K1;MAP3K1;MAP3K2;MAP3K5;MAP4K4;MAP4K5;MEF2A;MEF2C
325	mapkinase signaling pathway	miRNA	hsa-miR-3662	56	46	12	2.22287	1.41517	6.90878	4.88839e-12	1.35775e-05	MAP2K4;MAP3K1;MAP3K12;MAP3K13;MAP3K8;MAP4K3;MAP4K4;MAPK9;MEF2C;PAK2;RAF1;SP1
326	mapkinase signaling pathway	miRNA	hsa-miR-520d-5p	56	46	13	2.22287	1.41517	7.6154	2.62876e-14	7.30139e-08	CHUK;CREB1;MAP3K1;MAP3K13;MAP3K4;MAP4K3;MAP4K4;MAP4K5;MAPK9;MEF2A;MEF2C;SP1;STAT1
327	mapkinase signaling pathway	miRNA	hsa-miR-548d-3p	56	46	12	2.22287	1.41517	6.90878	4.88839e-12	1.35775e-05	ATF2;CEBPA;CHUK;FOS;MAP2K4;MAP3K2;MAP3K3;MAP3K5;MAP4K5;MEF2C;MYC;RAF1
328	mapkinase signaling pathway	miRNA	hsa-miR-93-5p	56	46	11	2.22287	1.41517	6.20215	5.5697e-10	0.00154699	CREB1;MAP2K1;MAP3K1;MAP3K12;MAP3K14;MAP3K3;MAP3K5;MAP3K7;MAP3K8;MEF2C;RPS6KA1
329	mcalpain and friends in cell motility	miRNA	hsa-miR-200b-3p	30	21	7	0.740959	0.832544	7.51797	5.56333e-14	1.54522e-07	MYLK;PRKACB;PRKAR1A;PRKAR2B;RAC1;SHC1;TLN1
330	mcalpain and friends in cell motility	miRNA	hsa-miR-200c-3p	30	21	7	0.740959	0.832544	7.51797	5.56333e-14	1.54522e-07	MYLK;PRKACB;PRKAR1A;PRKAR2B;RAC1;SHC1;TLN1
331	mcalpain and friends in cell motility	miRNA	hsa-miR-429	30	21	6	0.740959	0.832544	6.31683	2.66983e-10	0.000741546	MYLK;PRKACB;PRKAR1A;PRKAR2B;RAC1;SHC1
332	mcalpain and friends in cell motility	miRNA	hsa-miR-506-3p	30	21	6	0.740959	0.832544	6.31683	2.66983e-10	0.000741546	CAPN2;ITGB1;MAPK1;RAC1;SOS1;TLN1
333	mechanism of gene regulation by peroxisome proliferators via ppara	miRNA	hsa-miR-200b-3p	51	38	12	1.81077	1.25601	8.11237	4.96419e-16	1.37881e-09	CITED2;CREBBP;DUSP1;EP300;MED1;PPARGC1A;PRKACB;PRKAR1A;PRKAR2B;PRKCA;PRKCB;SP1
334	mechanism of gene regulation by peroxisome proliferators via ppara	miRNA	hsa-miR-200c-3p	51	38	12	1.81077	1.25601	8.11237	4.96419e-16	1.37881e-09	CITED2;CREBBP;DUSP1;EP300;JUN;MED1;PPARGC1A;PRKACB;PRKAR1A;PRKAR2B;PRKCB;SP1
335	mechanism of gene regulation by peroxisome proliferators via ppara	miRNA	hsa-miR-3163	51	38	11	1.81077	1.25601	7.3162	2.55091e-13	7.08516e-07	DUSP1;FAT1;MAPK1;MED1;NCOA1;NRIP1;PPARGC1A;PRKAR1A;PRKAR2B;RB1;STAT5B
336	mechanism of gene regulation by peroxisome proliferators via ppara	miRNA	hsa-miR-429	51	38	11	1.81077	1.25601	7.3162	2.55091e-13	7.08516e-07	CITED2;CREBBP;DUSP1;EP300;MED1;PPARGC1A;PRKACB;PRKAR1A;PRKAR2B;PRKCA;PRKCB
337	mechanism of gene regulation by peroxisome proliferators via ppara	miRNA	hsa-miR-495	51	38	12	1.81077	1.25601	8.11237	4.96419e-16	1.37881e-09	CITED2;CREBBP;EP300;FAT1;HSP90AA1;JUN;ME1;MED1;NCOA1;PPARGC1A;PRKAR1A;PRKCB
338	mechanism of gene regulation by peroxisome proliferators via ppara	miRNA	hsa-miR-7-1-3p	51	38	10	1.81077	1.25601	6.52003	7.02933e-11	0.00019524	CREBBP;DUSP1;FAT1;HSP90AA1;ME1;MED1;NCOA1;PPARGC1A;PRKACB;SP1
339	mets affect on macrophage differentiation	miRNA	hsa-miR-101-3p	18	15	4	0.381834	0.602794	6.00233	1.94506e-09	0.00540241	ETS1;FOS;RBL2;SIN3A
340	mets affect on macrophage differentiation	miRNA	hsa-miR-144-3p	18	15	4	0.381834	0.602794	6.00233	1.94506e-09	0.00540241	ETS1;FOS;RBL2;SIN3A
341	mets affect on macrophage differentiation	miRNA	hsa-miR-221-3p	18	15	4	0.381834	0.602794	6.00233	1.94506e-09	0.00540241	ETS1;ETS2;ETV3;FOS
342	mets affect on macrophage differentiation	miRNA	hsa-miR-3163	18	15	5	0.381834	0.602794	7.66127	1.84103e-14	5.11347e-08	E2F4;ETS1;FOS;HDAC2;RBL2
343	mets affect on macrophage differentiation	miRNA	hsa-miR-548v	18	15	4	0.381834	0.602794	6.00233	1.94506e-09	0.00540241	ETS1;ETS2;ETV3;FOS
344	mtor signaling pathway	miRNA	hsa-miR-15a-5p	24	20	9	1.00757	0.940196	8.50081	1.88272e-17	5.22926e-11	EIF3A;EIF4B;EIF4E;FKBP1A;GHR;MKNK1;PIK3R1;PTEN;RPS6KB1
345	mtor signaling pathway	miRNA	hsa-miR-15b-5p	24	20	7	1.00757	0.940196	6.3736	1.84642e-10	0.000512844	EIF3A;EIF4B;EIF4E;FKBP1A;GHR;MKNK1;RPS6KB1
346	mtor signaling pathway	miRNA	hsa-miR-16-5p	24	20	9	1.00757	0.940196	8.50081	1.88272e-17	5.22926e-11	EIF3A;EIF4B;EIF4E;FKBP1A;GHR;MKNK1;PIK3R1;PTEN;RPS6KB1
347	mtor signaling pathway	miRNA	hsa-miR-195-5p	24	20	8	1.00757	0.940196	7.4372	1.02842e-13	2.85644e-07	EIF3A;EIF4B;EIF4E;FKBP1A;GHR;MKNK1;PIK3R1;RPS6KB1
348	multi-step regulation of transcription by pitx2	miRNA	hsa-miR-410	27	20	8	1.22708	1.05198	6.43828	1.20835e-10	0.00033562	CCND2;CREBBP;EP300;FZD1;GSK3B;HDAC1;LRP6;PITX2
349	multiple antiapoptotic pathways from igf-1r signaling lead to bad phosphorylation	miRNA	hsa-miR-105-5p	13	11	5	0.595458	0.740536	5.94777	2.7182e-09	0.00754981	GRB2;IGF1;IGF1R;PIK3CA;SOS1
350	multiple antiapoptotic pathways from igf-1r signaling lead to bad phosphorylation	miRNA	hsa-miR-32-3p	13	11	5	0.595458	0.740536	5.94777	2.7182e-09	0.00754981	GRB2;IGF1;IGF1R;IRS1;RAF1
351	multiple antiapoptotic pathways from igf-1r signaling lead to bad phosphorylation	miRNA	hsa-miR-410	13	11	5	0.595458	0.740536	5.94777	2.7182e-09	0.00754981	GRB2;IGF1;IGF1R;IRS1;SOS1
352	multiple antiapoptotic pathways from igf-1r signaling lead to bad phosphorylation	miRNA	hsa-miR-9-3p	13	11	5	0.595458	0.740536	5.94777	2.7182e-09	0.00754981	IGF1;IGF1R;PIK3CA;PIK3R1;YWHAH
353	nfat and hypertrophy of the heart	miRNA	hsa-miR-33a-5p	44	32	10	1.94028	1.30225	6.18906	6.0524e-10	0.00168106	CAMK4;CREBBP;EDN1;GSK3B;MEF2C;PDPK1;PIK3R1;PPP3CB;RPS6KB1;YWHAH
354	nfat and hypertrophy of the heart	miRNA	hsa-miR-33b-5p	44	32	11	1.94028	1.30225	6.95696	3.47694e-12	9.65721e-06	ATP2A2;CAMK4;CREBBP;EDN1;GSK3B;MEF2C;PDPK1;PIK3R1;PPP3CA;PPP3CB;RPS6KB1
355	nfat and hypertrophy of the heart	miRNA	hsa-miR-340-5p	44	32	11	1.94028	1.30225	6.95696	3.47694e-12	9.65721e-06	ATP2A2;CREBBP;EDN1;GSK3B;HDAC9;IGF1;MEF2C;PPP3CA;PPP3CB;RPS6KB1;YWHAH
356	nfat and hypertrophy of the heart	miRNA	hsa-miR-3910	44	32	10	1.94028	1.30225	6.18906	6.0524e-10	0.00168106	ADSS;ATP2A2;CREBBP;HDAC5;HDAC9;MEF2C;PIK3CA;PPP3CA;RPS6KB1;SOS1
357	nfat and hypertrophy of the heart	miRNA	hsa-miR-410	44	32	11	1.94028	1.30225	6.95696	3.47694e-12	9.65721e-06	CREBBP;GRB2;GSK3B;HBEGF;HDAC9;IGF1;MEF2C;PDPK1;PPP3CA;PPP3CB;SOS1
358	nfat and hypertrophy of the heart	miRNA	hsa-miR-548d-3p	44	32	10	1.94028	1.30225	6.18906	6.0524e-10	0.00168106	ATP2A2;CAMKK2;CREBBP;GRB2;GSK3B;HAND1;HBEGF;HDAC9;MEF2C;PPP3CA
359	nfat and hypertrophy of the heart	miRNA	hsa-miR-98	44	32	10	1.94028	1.30225	6.18906	6.0524e-10	0.00168106	ACTA1;ATP2A2;EDN1;HAND1;HAND2;HBEGF;HDAC9;IGF1;MEF2C;PPP3CA
360	nfkb activation by nontypeable hemophilus influenzae	miRNA	hsa-let-7a-3p	29	20	8	0.899075	0.904413	7.85142	4.11353e-15	1.14253e-08	CREBBP;MAP4K4;NFKBIA;NR3C1;SMAD4;TGFB2;TGFB3;TGFBR1
361	nfkb activation by nontypeable hemophilus influenzae	miRNA	hsa-miR-369-3p	29	20	7	0.899075	0.904413	6.74573	1.5226e-11	4.22903e-05	DUSP1;EP300;IKBKB;MAP3K7;MAP4K4;NR3C1;TGFB2
362	nfkb activation by nontypeable hemophilus influenzae	miRNA	hsa-miR-429	29	20	7	0.899075	0.904413	6.74573	1.5226e-11	4.22903e-05	CREBBP;DUSP1;EP300;IKBKB;MAP4K4;NR3C1;TGFB2
363	oxidative stress induced gene expression via nrf2	miRNA	hsa-miR-142-5p	18	10	4	0.387721	0.59711	6.04961	1.45197e-09	0.00403285	CREB1;MAFF;NFE2L2;PRKCB
364	p38 mapk signaling pathway	miRNA	hsa-let-7a-3p	30	27	9	1.43145	1.12121	6.75032	1.47519e-11	4.09735e-05	CDC42;CREB1;MAP2K4;MAP3K1;MAP3K5;MEF2A;MEF2C;MEF2D;NR2C2
365	p38 mapk signaling pathway	miRNA	hsa-miR-548d-3p	30	27	10	1.43145	1.12121	7.64221	2.13525e-14	5.93067e-08	ATF2;H3F3A;H3F3B;HMGN1;MAP2K4;MAP3K5;MAPKAPK5;MEF2C;MYC;RPS6KA5
366	p53 signaling pathway	miRNA	hsa-miR-106a-5p	13	11	5	0.405383	0.620871	7.40028	1.35898e-13	3.77457e-07	CCND1;CDKN1A;E2F1;RB1;TIMP3
367	p53 signaling pathway	miRNA	hsa-miR-106b-5p	13	11	5	0.405383	0.620871	7.40028	1.35898e-13	3.77457e-07	CCND1;CDKN1A;E2F1;RB1;TIMP3
368	p53 signaling pathway	miRNA	hsa-miR-17-5p	13	11	5	0.405383	0.620871	7.40028	1.35898e-13	3.77457e-07	CCND1;CDKN1A;E2F1;RB1;TIMP3
369	p53 signaling pathway	miRNA	hsa-miR-20a-5p	13	11	5	0.405383	0.620871	7.40028	1.35898e-13	3.77457e-07	CCND1;CDKN1A;E2F1;RB1;TIMP3
370	p53 signaling pathway	miRNA	hsa-miR-20b-5p	13	11	5	0.405383	0.620871	7.40028	1.35898e-13	3.77457e-07	CCND1;CDKN1A;E2F1;RB1;TIMP3
371	p53 signaling pathway	miRNA	hsa-miR-3163	13	11	5	0.405383	0.620871	7.40028	1.35898e-13	3.77457e-07	BCL2;CDK4;GADD45A;RB1;TIMP3
372	pdgf signaling pathway	miRNA	hsa-miR-30e-5p	26	24	8	1.15223	1.02299	6.69387	2.17345e-11	6.03677e-05	JAK1;MAP2K4;MAP3K1;PDGFA;PLCG1;PRKCB;RASA1;SOS1
373	phospholipase c signaling pathway	miRNA	hsa-miR-9-3p	5	5	4	0.402019	0.586093	6.13893	8.30792e-10	0.00230753	PDPK1;PIK3CA;PIK3R1;PLCG1
374	phospholipase c-epsilon pathway	miRNA	hsa-miR-200b-3p	12	7	4	0.322961	0.548339	6.70577	2.00347e-11	5.56465e-05	ADRB2;PRKACB;PRKAR1A;PRKAR2B
375	phospholipase c-epsilon pathway	miRNA	hsa-miR-200c-3p	12	7	4	0.322961	0.548339	6.70577	2.00347e-11	5.56465e-05	ADRB2;PRKACB;PRKAR1A;PRKAR2B
376	phospholipase c-epsilon pathway	miRNA	hsa-miR-429	12	7	4	0.322961	0.548339	6.70577	2.00347e-11	5.56465e-05	ADRB2;PRKACB;PRKAR1A;PRKAR2B
377	phospholipids as signalling intermediaries	miRNA	hsa-miR-106a-5p	33	24	7	0.98402	0.96091	6.26071	3.83229e-10	0.00106442	GNAI1;MAP2K1;PDGFRA;PIK3R1;PTK2;S1PR1;SRC
378	phospholipids as signalling intermediaries	miRNA	hsa-miR-19a-3p	33	24	8	0.98402	0.96091	7.30139	2.8481e-13	7.91061e-07	GNAI1;GNB1;MAPK1;PIK3CA;PRKCA;PRKCB;RAF1;S1PR1
379	phospholipids as signalling intermediaries	miRNA	hsa-miR-20a-5p	33	24	7	0.98402	0.96091	6.26071	3.83229e-10	0.00106442	GNAI1;GNB1;PDGFRA;PIK3R1;PTK2;S1PR1;SOS1
380	phospholipids as signalling intermediaries	miRNA	hsa-miR-33a-5p	33	24	9	0.98402	0.96091	8.34207	7.30012e-17	2.02761e-10	GNB1;PDGFA;PDGFRA;PDPK1;PIK3R1;PRKCB;RAC1;S1PR1;SRC
381	phospholipids as signalling intermediaries	miRNA	hsa-miR-548l	33	24	7	0.98402	0.96091	6.26071	3.83229e-10	0.00106442	MAPK1;PDGFA;PDPK1;PRKCB;SOS1;SPHKAP;SRC
382	prion pathway	miRNA	hsa-miR-106a-5p	17	9	3	0.196804	0.434154	6.45669	1.07018e-10	0.000297243	DNAJB6;LAMA3;LAMC1
383	prion pathway	miRNA	hsa-miR-106b-5p	17	9	3	0.196804	0.434154	6.45669	1.07018e-10	0.000297243	DNAJB6;LAMA3;LAMC1
384	prion pathway	miRNA	hsa-miR-15a-5p	17	9	3	0.196804	0.434154	6.45669	1.07018e-10	0.000297243	BCL2;DNAJB6;LAMC1
385	prion pathway	miRNA	hsa-miR-181a-5p	17	9	3	0.196804	0.434154	6.45669	1.07018e-10	0.000297243	BCL2;HSPA5;LAMC1
386	prion pathway	miRNA	hsa-miR-20b-5p	17	9	3	0.196804	0.434154	6.45669	1.07018e-10	0.000297243	DNAJB6;LAMA3;LAMC1
387	prion pathway	miRNA	hsa-miR-30d-5p	17	9	3	0.196804	0.434154	6.45669	1.07018e-10	0.000297243	BCL2;DNAJB6;HSPA5
388	prion pathway	miRNA	hsa-miR-4262	17	9	3	0.196804	0.434154	6.45669	1.07018e-10	0.000297243	BCL2;HSPA5;LAMC1
389	prion pathway	miRNA	hsa-miR-543	17	9	3	0.196804	0.434154	6.45669	1.07018e-10	0.000297243	DNAJB6;LAMA3;LAMC1
390	prion pathway	miRNA	hsa-miR-93-5p	17	9	3	0.196804	0.434154	6.45669	1.07018e-10	0.000297243	DNAJB6;LAMA3;LAMC1
391	proteasome complex	miRNA	hsa-miR-128	24	12	3	0.183347	0.414351	6.79774	1.06273e-11	2.95174e-05	PSMA1;RPN1;UBE3A
392	proteasome complex	miRNA	hsa-miR-27a-3p	24	12	3	0.183347	0.414351	6.79774	1.06273e-11	2.95174e-05	PSMA1;RPN1;RPN2
393	proteasome complex	miRNA	hsa-miR-590-3p	24	12	3	0.183347	0.414351	6.79774	1.06273e-11	2.95174e-05	PSMA1;PSMA2;PSMD12
394	proteolysis and signaling pathway of notch	miRNA	hsa-miR-3163	6	6	3	0.21783	0.454587	6.12022	9.34463e-10	0.00259547	DLL1;NOTCH1;RBPJ
395	proteolysis and signaling pathway of notch	miRNA	hsa-miR-338-3p	6	6	3	0.21783	0.454587	6.12022	9.34463e-10	0.00259547	ADAM17;DLL1;FURIN
396	proteolysis and signaling pathway of notch	miRNA	hsa-miR-338-5p	6	6	3	0.21783	0.454587	6.12022	9.34463e-10	0.00259547	DLL1;FURIN;RBPJ
397	proteolysis and signaling pathway of notch	miRNA	hsa-miR-524-5p	6	6	3	0.21783	0.454587	6.12022	9.34463e-10	0.00259547	ADAM17;DLL1;FURIN
398	proteolysis and signaling pathway of notch	miRNA	hsa-miR-7-1-3p	6	6	3	0.21783	0.454587	6.12022	9.34463e-10	0.00259547	DLL1;FURIN;NOTCH1
399	pten dependent cell cycle arrest and apoptosis	miRNA	hsa-miR-105-5p	15	12	6	0.765348	0.818774	6.39328	1.62365e-10	0.000450969	CDKN1B;FASLG;GRB2;PIK3CA;PTEN;SOS1
400	rac1 cell motility signaling pathway	miRNA	hsa-miR-200b-3p	36	23	9	1.38688	1.12462	6.76949	1.29237e-11	3.58956e-05	ARHGAP6;ASAP1;CADM1;MAP3K1;MYLK;RAC1;RPS6KB1;TRIO;WASF1
401	rac1 cell motility signaling pathway	miRNA	hsa-miR-200c-3p	36	23	10	1.38688	1.12462	7.65868	1.87854e-14	5.21765e-08	ARHGAP6;ASAP2;CADM1;LIMK1;MAP3K1;MYLK;RAC1;RPS6KB1;TRIO;WASF1
402	rac1 cell motility signaling pathway	miRNA	hsa-miR-429	36	23	10	1.38688	1.12462	7.65868	1.87854e-14	5.21765e-08	ARHGAP6;ASAP1;CADM1;LIMK1;MAP3K1;MYLK;RAC1;RPS6KB1;TRIO;WASF1
403	ras signaling pathway	miRNA	hsa-miR-3662	20	14	6	0.745164	0.827191	6.35262	2.11678e-10	0.000587936	BCL2L1;CDC42;PIK3R1;RAF1;RALA;RHOA
404	ras signaling pathway	miRNA	hsa-miR-9-3p	20	14	6	0.745164	0.827191	6.35262	2.11678e-10	0.000587936	CDC42;PDPK1;PIK3CA;PIK3R1;RAC1;RALA
405	rb tumor suppressor/checkpoint signaling in response to dna damage	miRNA	hsa-miR-519b-3p	13	12	5	0.41968	0.624285	7.33691	2.18581e-13	6.0711e-07	CDK2;E2F1;MYT1;RB1;WEE1
406	rb tumor suppressor/checkpoint signaling in response to dna damage	miRNA	hsa-miR-519c-3p	13	12	5	0.41968	0.624285	7.33691	2.18581e-13	6.0711e-07	CDK2;E2F1;MYT1;RB1;WEE1
407	regulation of bad phosphorylation	miRNA	hsa-miR-9-3p	23	16	8	0.812448	0.868374	8.27702	1.26296e-16	3.50788e-10	IGF1;IGF1R;KITLG;PDPK1;PIK3CA;PIK3R1;PRKAR2B;YWHAH
408	regulation of cell cycle progression by plk3	miRNA	hsa-miR-9-3p	18	12	3	0.133726	0.362687	7.90288	2.72532e-15	7.56959e-09	CASP7;PLK3;YWHAH
409	regulation of ck1/cdk5 by type 1 glutamate receptors	miRNA	hsa-miR-20a-5p	24	15	6	0.809083	0.846104	6.13508	8.51164e-10	0.00236411	DRD1;GNB1;PLCB1;PPP3CA;PRKACB;PRKAR1A
410	regulation of ck1/cdk5 by type 1 glutamate receptors	miRNA	hsa-miR-3163	24	15	6	0.809083	0.846104	6.13508	8.51164e-10	0.00236411	ADRBK1;GRM1;PLCB1;PPP3CA;PRKAR1A;PRKAR2B
411	regulation of eif-4e and p70s6 kinase	miRNA	hsa-miR-9-3p	24	22	7	1.10681	0.987034	5.9706	2.36383e-09	0.00656555	PABPC1;PDPK1;PIK3CA;PIK3R1;PPP2CA;PTEN;RPS6KB1
412	regulation of map kinase pathways through dual specificity phosphatases	miRNA	hsa-let-7a-5p	9	7	3	0.15307	0.383829	7.41718	1.1964e-13	3.32301e-07	DUSP1;DUSP4;DUSP6
413	regulation of map kinase pathways through dual specificity phosphatases	miRNA	hsa-let-7d-5p	9	7	3	0.15307	0.383829	7.41718	1.1964e-13	3.32301e-07	DUSP1;DUSP4;DUSP6
414	regulation of map kinase pathways through dual specificity phosphatases	miRNA	hsa-let-7f-5p	9	7	3	0.15307	0.383829	7.41718	1.1964e-13	3.32301e-07	DUSP1;DUSP4;DUSP6
415	regulation of map kinase pathways through dual specificity phosphatases	miRNA	hsa-let-7g-5p	9	7	3	0.15307	0.383829	7.41718	1.1964e-13	3.32301e-07	DUSP1;DUSP4;DUSP6
416	regulation of map kinase pathways through dual specificity phosphatases	miRNA	hsa-miR-106b-5p	9	7	3	0.15307	0.383829	7.41718	1.1964e-13	3.32301e-07	DUSP2;DUSP6;DUSP8
417	regulation of pgc-1a	miRNA	hsa-miR-103a-3p	20	17	7	1.11774	0.972178	6.05059	1.44316e-09	0.00400838	CAMK2G;ESRRA;MEF2D;PPARGC1A;PPP3CA;SLC2A14;YWHAH
418	regulation of pgc-1a	miRNA	hsa-miR-107	20	17	7	1.11774	0.972178	6.05059	1.44316e-09	0.00400838	CAMK2G;MEF2D;PPARGC1A;PPP3CA;PPP3CB;SLC2A14;YWHAH
419	regulation of pgc-1a	miRNA	hsa-miR-153	20	17	7	1.11774	0.972178	6.05059	1.44316e-09	0.00400838	CAMK2G;MEF2A;MEF2C;PPARGC1A;PPP3CA;PPP3CB;YWHAH
420	regulation of pgc-1a	miRNA	hsa-miR-7-1-3p	20	17	7	1.11774	0.972178	6.05059	1.44316e-09	0.00400838	CAMK2A;CAMK2G;HDAC5;MEF2A;MEF2D;PPARGC1A;PPP3CB
421	regulation of transcriptional activity by pml	miRNA	hsa-miR-3163	10	8	4	0.352397	0.566898	6.43432	1.24027e-10	0.000344485	RB1;SIRT1;SUMO1;UBE2I
422	regulation of transcriptional activity by pml	miRNA	hsa-miR-548c-3p	10	8	4	0.352397	0.566898	6.43432	1.24027e-10	0.000344485	CREBBP;RB1;SIRT1;SP100
423	regulators of bone mineralization	miRNA	hsa-let-7f-5p	11	9	3	0.140454	0.368605	7.75775	8.64493e-15	2.40113e-08	COL4A1;COL4A5;COL4A6
424	regulators of bone mineralization	miRNA	hsa-let-7g-5p	11	9	3	0.140454	0.368605	7.75775	8.64493e-15	2.40113e-08	COL4A1;COL4A5;COL4A6
425	regulators of bone mineralization	miRNA	hsa-miR-29a-3p	11	9	5	0.140454	0.368605	13.1836	1.0906e-39	3.02915e-33	COL4A1;COL4A2;COL4A3;COL4A4;COL4A5
426	regulators of bone mineralization	miRNA	hsa-miR-29b-3p	11	9	6	0.140454	0.368605	15.8965	6.70052e-57	1.86107e-50	COL4A1;COL4A2;COL4A3;COL4A4;COL4A5;COL4A6
427	regulators of bone mineralization	miRNA	hsa-miR-29c-3p	11	9	6	0.140454	0.368605	15.8965	6.70052e-57	1.86107e-50	COL4A1;COL4A2;COL4A3;COL4A4;COL4A5;COL4A6
428	regulators of bone mineralization	miRNA	hsa-miR-767-5p	11	9	3	0.140454	0.368605	7.75775	8.64493e-15	2.40113e-08	COL4A1;COL4A4;COL4A5
429	reversal of insulin resistance by leptin	miRNA	hsa-miR-30e-3p	9	5	3	0.130362	0.354878	8.08627	6.15197e-16	1.70871e-09	PRKAA1;PRKAA2;PRKAG2
430	rho cell motility signaling pathway	miRNA	hsa-let-7a-3p	32	22	8	0.925147	0.92705	7.63158	2.31894e-14	6.44087e-08	ARAP2;ARHGAP5;ARHGAP6;ASAP1;RHOA;ROCK1;TRIO;VCL
431	rho cell motility signaling pathway	miRNA	hsa-let-7f-1-3p	32	22	7	0.925147	0.92705	6.55289	5.64341e-11	0.000156746	ARAP2;ARHGAP5;ARHGAP6;ASAP1;RHOA;TRIO;VCL
432	rho cell motility signaling pathway	miRNA	hsa-let-7f-2-3p	32	22	8	0.925147	0.92705	7.63158	2.31894e-14	6.44087e-08	ARAP2;ARHGAP5;ARHGAP6;ASAP1;ASAP2;RHOA;ROCK1;VCL
433	rho cell motility signaling pathway	miRNA	hsa-miR-200c-3p	32	22	7	0.925147	0.92705	6.55289	5.64341e-11	0.000156746	ARHGAP6;ASAP2;LIMK1;MYLK;RHOA;TLN1;TRIO
434	rho cell motility signaling pathway	miRNA	hsa-miR-340-5p	32	22	8	0.925147	0.92705	7.63158	2.31894e-14	6.44087e-08	ARHGAP5;ARHGAP6;ASAP1;ASAP2;PIP5K1B;RALBP1;RHOA;ROCK1
435	rho-selective guanine exchange factor akap13 mediates stress fiber formation	miRNA	hsa-miR-200b-3p	11	8	4	0.291842	0.520122	7.12939	1.00815e-12	2.80014e-06	LPAR1;PRKACB;PRKAR2B;RHOA
436	rho-selective guanine exchange factor akap13 mediates stress fiber formation	miRNA	hsa-miR-200c-3p	11	8	4	0.291842	0.520122	7.12939	1.00815e-12	2.80014e-06	LPAR1;PRKACB;PRKAR2B;RHOA
437	rho-selective guanine exchange factor akap13 mediates stress fiber formation	miRNA	hsa-miR-3646	11	8	4	0.291842	0.520122	7.12939	1.00815e-12	2.80014e-06	AKAP13;LPAR1;PRKACB;RHOA
438	rho-selective guanine exchange factor akap13 mediates stress fiber formation	miRNA	hsa-miR-429	11	8	4	0.291842	0.520122	7.12939	1.00815e-12	2.80014e-06	LPAR1;PRKACB;PRKAR2B;RHOA
439	role of -arrestins in the activation and targeting of map kinases	miRNA	hsa-miR-130a-3p	30	17	5	0.582002	0.741533	5.95793	2.55453e-09	0.00709522	CXCL12;CXCR4;EDN1;GNB1;HTR2C
440	role of -arrestins in the activation and targeting of map kinases	miRNA	hsa-miR-15a-5p	30	17	5	0.582002	0.741533	5.95793	2.55453e-09	0.00709522	ADRB2;GNB1;HTR2C;MAP2K1;RAF1
441	role of -arrestins in the activation and targeting of map kinases	miRNA	hsa-miR-15b-5p	30	17	5	0.582002	0.741533	5.95793	2.55453e-09	0.00709522	ADRB2;GNB1;HTR2C;MAP2K1;RAF1
442	role of -arrestins in the activation and targeting of map kinases	miRNA	hsa-miR-195-5p	30	17	5	0.582002	0.741533	5.95793	2.55453e-09	0.00709522	ADRB2;GNB1;HTR2C;MAP2K1;RAF1
443	role of -arrestins in the activation and targeting of map kinases	miRNA	hsa-miR-19a-3p	30	17	5	0.582002	0.741533	5.95793	2.55453e-09	0.00709522	CXCL12;EDNRB;GNB1;MAPK1;RAF1
444	role of -arrestins in the activation and targeting of map kinases	miRNA	hsa-miR-301a-3p	30	17	5	0.582002	0.741533	5.95793	2.55453e-09	0.00709522	CXCL12;EDN1;HTR2C;MAPK1;RAF1
445	role of -arrestins in the activation and targeting of map kinases	miRNA	hsa-miR-301b	30	17	5	0.582002	0.741533	5.95793	2.55453e-09	0.00709522	CXCL12;EDN1;GNB1;HTR2C;MAPK1
446	role of -arrestins in the activation and targeting of map kinases	miRNA	hsa-miR-3143	30	17	5	0.582002	0.741533	5.95793	2.55453e-09	0.00709522	CXCL12;EDN1;GNB1;HTR2C;MAPK1
447	role of -arrestins in the activation and targeting of map kinases	miRNA	hsa-miR-381	30	17	5	0.582002	0.741533	5.95793	2.55453e-09	0.00709522	ADRA1B;ADRB2;CXCL12;CXCR4;GNB1
448	role of -arrestins in the activation and targeting of map kinases	miRNA	hsa-miR-7-5p	30	17	5	0.582002	0.741533	5.95793	2.55453e-09	0.00709522	ADRBK1;CXCL12;GNB1;HTR2C;RAF1
449	role of egf receptor transactivation by gpcrs in cardiac hypertrophy	miRNA	hsa-miR-19a-3p	33	26	7	0.784693	0.859564	7.23077	4.80263e-13	1.33393e-06	ADAM12;EDNRB;GNB1;MAPK1;PRKCA;PRKCB;RAF1
450	role of egf receptor transactivation by gpcrs in cardiac hypertrophy	miRNA	hsa-miR-200b-3p	33	26	6	0.784693	0.859564	6.06739	1.30006e-09	0.00361092	IKBKB;PLCG1;PRKCA;PRKCB;RHOA;SHC1
451	role of egf receptor transactivation by gpcrs in cardiac hypertrophy	miRNA	hsa-miR-200c-3p	33	26	6	0.784693	0.859564	6.06739	1.30006e-09	0.00361092	IKBKB;JUN;PLCG1;PRKCB;RHOA;SHC1
452	role of egf receptor transactivation by gpcrs in cardiac hypertrophy	miRNA	hsa-miR-429	33	26	6	0.784693	0.859564	6.06739	1.30006e-09	0.00361092	IKBKB;PLCG1;PRKCA;PRKCB;RHOA;SHC1
453	role of egf receptor transactivation by gpcrs in cardiac hypertrophy	miRNA	hsa-miR-548d-3p	33	26	8	0.784693	0.859564	8.39415	4.69277e-17	1.30342e-10	CHUK;FOS;GNA11;GRB2;MYC;PRKCB;RAF1;RHOA
454	role of erk5 in neuronal survival pathway	miRNA	hsa-miR-105-5p	26	21	7	1.10513	0.991621	5.94468	2.76997e-09	0.0076936	CREB1;GRB2;MAPK1;MEF2C;MEF2D;PIK3CA;SOS1
455	role of erk5 in neuronal survival pathway	miRNA	hsa-miR-330-3p	26	21	7	1.10513	0.991621	5.94468	2.76997e-09	0.0076936	BDNF;CREB1;MAP2K1;MEF2A;MEF2C;NTF3;PIK3R1
456	role of erk5 in neuronal survival pathway	miRNA	hsa-miR-338-5p	26	21	8	1.10513	0.991621	6.95313	3.57269e-12	9.92316e-06	BDNF;CREB1;MAPK1;MEF2A;MEF2C;MEF2D;NTF3;PDPK1
457	role of erk5 in neuronal survival pathway	miRNA	hsa-miR-410	26	21	7	1.10513	0.991621	5.94468	2.76997e-09	0.0076936	BDNF;GRB2;MEF2A;MEF2C;NTF3;PDPK1;SOS1
458	role of erk5 in neuronal survival pathway	miRNA	hsa-miR-9-3p	26	21	7	1.10513	0.991621	5.94468	2.76997e-09	0.0076936	BDNF;MEF2A;MEF2C;PDPK1;PIK3CA;PIK3R1;PLCG1
459	role of mal in rho-mediated activation of srf	miRNA	hsa-miR-3662	19	14	6	0.723297	0.802632	6.57425	4.8899e-11	0.000135817	ACTA1;CDC42;MAP3K1;RAF1;RHOA;SRF
460	role of mal in rho-mediated activation of srf	miRNA	hsa-miR-429	19	14	6	0.723297	0.802632	6.57425	4.8899e-11	0.000135817	CDC42;LIMK1;MAP3K1;RAC1;RHOA;SRF
461	role of mef2d in t-cell apoptosis	miRNA	hsa-miR-429	28	14	5	0.576114	0.719103	6.15195	7.6536e-10	0.00212579	EP300;FYN;PLCG1;PRKCA;PRKCB
462	role of mef2d in t-cell apoptosis	miRNA	hsa-miR-548c-3p	28	14	5	0.576114	0.719103	6.15195	7.6536e-10	0.00212579	EP300;MEF2D;PPP3CA;PPP3CB;PRKCB
463	role of nicotinic acetylcholine receptors in the regulation of apoptosis	miRNA	hsa-miR-33a-5p	17	11	4	0.353238	0.577744	6.31207	2.75328e-10	0.000764725	PDPK1;PIK3R1;SRC;YWHAH
464	role of nicotinic acetylcholine receptors in the regulation of apoptosis	miRNA	hsa-miR-520d-5p	17	11	4	0.353238	0.577744	6.31207	2.75328e-10	0.000764725	FOXO3;PTK2;RAPSN;YWHAH
465	role of nicotinic acetylcholine receptors in the regulation of apoptosis	miRNA	hsa-miR-524-5p	17	11	4	0.353238	0.577744	6.31207	2.75328e-10	0.000764725	AGRN;FOXO3;PTK2;RAPSN
466	role of nicotinic acetylcholine receptors in the regulation of apoptosis	miRNA	hsa-miR-9-3p	17	11	4	0.353238	0.577744	6.31207	2.75328e-10	0.000764725	PDPK1;PIK3CA;PIK3R1;YWHAH
467	role of parkin in ubiquitin-proteasomal pathway	miRNA	hsa-miR-3613-3p	8	5	3	0.172414	0.403127	7.01413	2.31384e-12	6.4267e-06	SUMO1;UBE2E2;UBE2G1
468	role of parkin in ubiquitin-proteasomal pathway	miRNA	hsa-miR-548x-3p	8	5	3	0.172414	0.403127	7.01413	2.31384e-12	6.4267e-06	GPR37;SUMO1;UBE2E2
469	role of pi3k subunit p85 in regulation of actin organization and cell migration	miRNA	hsa-miR-224-3p	16	14	6	0.839361	0.872309	5.91607	3.29725e-09	0.00915813	ACTR2;ACTR3;CDC42;PDGFRA;RAC1;WASL
470	role of pi3k subunit p85 in regulation of actin organization and cell migration	miRNA	hsa-miR-522-3p	16	14	6	0.839361	0.872309	5.91607	3.29725e-09	0.00915813	ACTR2;ACTR3;CDC42;PDGFRA;RAC1;WASL
471	role of ran in mitotic spindle regulation	miRNA	hsa-miR-3609	11	6	3	0.167368	0.400977	7.06432	1.61404e-12	4.483e-06	KPNA2;RANBP1;RANBP2
472	role of ran in mitotic spindle regulation	miRNA	hsa-miR-509-3-5p	11	6	3	0.167368	0.400977	7.06432	1.61404e-12	4.483e-06	KPNB1;RAN;RANBP2
473	role of ran in mitotic spindle regulation	miRNA	hsa-miR-548v	11	6	3	0.167368	0.400977	7.06432	1.61404e-12	4.483e-06	KPNA2;KPNB1;RANBP2
474	roles of arrestin dependent recruitment of src kinases in gpcr signaling	miRNA	hsa-miR-130a-3p	34	18	5	0.58873	0.746025	5.91303	3.35871e-09	0.00932883	CXCL12;CXCR4;EDN1;GNB1;HTR2C
475	roles of arrestin dependent recruitment of src kinases in gpcr signaling	miRNA	hsa-miR-15a-5p	34	18	5	0.58873	0.746025	5.91303	3.35871e-09	0.00932883	ADRB2;GNB1;HTR2C;MAP2K1;RAF1
476	roles of arrestin dependent recruitment of src kinases in gpcr signaling	miRNA	hsa-miR-15b-5p	34	18	5	0.58873	0.746025	5.91303	3.35871e-09	0.00932883	ADRB2;GNB1;HTR2C;MAP2K1;RAF1
477	roles of arrestin dependent recruitment of src kinases in gpcr signaling	miRNA	hsa-miR-195-5p	34	18	5	0.58873	0.746025	5.91303	3.35871e-09	0.00932883	ADRB2;GNB1;HTR2C;MAP2K1;RAF1
478	roles of arrestin dependent recruitment of src kinases in gpcr signaling	miRNA	hsa-miR-19a-3p	34	18	5	0.58873	0.746025	5.91303	3.35871e-09	0.00932883	CXCL12;EDNRB;GNB1;MAPK1;RAF1
479	roles of arrestin dependent recruitment of src kinases in gpcr signaling	miRNA	hsa-miR-301a-3p	34	18	5	0.58873	0.746025	5.91303	3.35871e-09	0.00932883	CXCL12;EDN1;HTR2C;MAPK1;RAF1
480	roles of arrestin dependent recruitment of src kinases in gpcr signaling	miRNA	hsa-miR-301b	34	18	5	0.58873	0.746025	5.91303	3.35871e-09	0.00932883	CXCL12;EDN1;GNB1;HTR2C;MAPK1
481	roles of arrestin dependent recruitment of src kinases in gpcr signaling	miRNA	hsa-miR-3143	34	18	5	0.58873	0.746025	5.91303	3.35871e-09	0.00932883	CXCL12;EDN1;GNB1;HTR2C;MAPK1
482	roles of arrestin dependent recruitment of src kinases in gpcr signaling	miRNA	hsa-miR-381	34	18	5	0.58873	0.746025	5.91303	3.35871e-09	0.00932883	ADRA1B;ADRB2;CXCL12;CXCR4;GNB1
483	roles of arrestin dependent recruitment of src kinases in gpcr signaling	miRNA	hsa-miR-7-5p	34	18	5	0.58873	0.746025	5.91303	3.35871e-09	0.00932883	ADRBK1;CXCL12;GNB1;HTR2C;RAF1
484	segmentation clock	miRNA	hsa-let-7a-3p	23	19	7	0.906644	0.910688	6.69094	2.21742e-11	6.15889e-05	CTNNB1;DLL1;GSK3B;HES1;LRP6;RBPJ;WIF1
485	segmentation clock	miRNA	hsa-miR-301a-3p	23	19	8	0.906644	0.910688	7.78901	6.75363e-15	1.87582e-08	DKK1;DLL1;GSK3B;HES1;HEY2;LRP6;WIF1;WNT1
486	segmentation clock	miRNA	hsa-miR-497-5p	23	19	7	0.906644	0.910688	6.69094	2.21742e-11	6.15889e-05	DKK1;DLL1;DVL1;HEY2;LRP6;NKD1;WIF1
487	signal transduction through il1r	miRNA	hsa-miR-23a-3p	37	21	6	0.762826	0.82937	6.31464	2.70791e-10	0.000752123	CHUK;MAP3K1;MAP4K4;MAPK14;TAB2;TGFB2
488	signal transduction through il1r	miRNA	hsa-miR-23b-3p	37	21	6	0.762826	0.82937	6.31464	2.70791e-10	0.000752123	CHUK;MAP3K1;MAP4K4;MAPK14;TAB2;TGFB2
489	signal transduction through il1r	miRNA	hsa-miR-23c	37	21	6	0.762826	0.82937	6.31464	2.70791e-10	0.000752123	CHUK;MAP3K1;MAP4K4;MAPK14;TAB2;TGFB2
490	signaling pathway from g-protein families	miRNA	hsa-miR-15a-5p	26	21	7	1.06644	0.984317	6.0281	1.65898e-09	0.00460782	GNAQ;GNB1;MAP2K1;PPP3CB;PRKAR2A;RAF1;RPS6KA3
491	signaling pathway from g-protein families	miRNA	hsa-miR-15b-5p	26	21	7	1.06644	0.984317	6.0281	1.65898e-09	0.00460782	GNAQ;GNB1;MAP2K1;PPP3CB;PRKAR2A;RAF1;RPS6KA3
492	signaling pathway from g-protein families	miRNA	hsa-miR-183-5p	26	21	7	1.06644	0.984317	6.0281	1.65898e-09	0.00460782	GNAQ;GNB1;PRKACB;PRKAR1A;PRKCA;PRKCB;RPS6KA3
493	signaling pathway from g-protein families	miRNA	hsa-miR-3609	26	21	7	1.06644	0.984317	6.0281	1.65898e-09	0.00460782	CREB1;GNAI1;GNAQ;MAP2K1;PPP3CB;PRKACB;PRKAR2B
494	signaling pathway from g-protein families	miRNA	hsa-miR-497-5p	26	21	7	1.06644	0.984317	6.0281	1.65898e-09	0.00460782	GNAQ;GNB1;MAP2K1;PPP3CB;PRKAR2A;RAF1;RPS6KA3
495	skeletal muscle hypertrophy is regulated via akt-mtor pathway	miRNA	hsa-miR-15a-5p	25	19	7	1.12447	0.986441	5.95629	2.58028e-09	0.00716674	EIF2B5;EIF4E;IGF1;MKNK1;PIK3R1;PTEN;RPS6KB1
496	skeletal muscle hypertrophy is regulated via akt-mtor pathway	miRNA	hsa-miR-548e	25	19	7	1.12447	0.986441	5.95629	2.58028e-09	0.00716674	EIF2S2;EIF4E;GSK3B;PDK2;PIK3R1;PTEN;RPS6KB1
497	skeletal muscle hypertrophy is regulated via akt-mtor pathway	miRNA	hsa-miR-9-3p	25	19	8	1.12447	0.986441	6.97003	3.16873e-12	8.80116e-06	IGF1;IGF1R;PABPC1;PDPK1;PIK3CA;PIK3R1;PTEN;RPS6KB1
498	spliceosomal assembly	miRNA	hsa-miR-520d-5p	8	5	3	0.184189	0.400983	7.02227	2.18292e-12	6.06307e-06	SNRPA1;SNRPC;SRSF2
499	sprouty regulation of tyrosine kinase signals	miRNA	hsa-miR-3163	20	16	6	0.640033	0.771489	6.94756	3.71658e-12	1.03228e-05	MAPK1;PTPRB;RASA1;SH3KBP1;SPRY1;SPRY2
500	stat3 signaling pathway	miRNA	hsa-miR-106b-5p	8	6	3	0.135408	0.36169	7.92003	2.37453e-15	6.59527e-09	JAK1;MAPK1;STAT3
501	stress induction of hsp regulation	miRNA	hsa-let-7a-5p	14	10	3	0.121951	0.344405	8.35659	6.45572e-17	1.79308e-10	ACTA1;CASP3;FASLG
502	stress induction of hsp regulation	miRNA	hsa-let-7b-5p	14	10	3	0.121951	0.344405	8.35659	6.45572e-17	1.79308e-10	ACTA1;CASP3;FASLG
503	stress induction of hsp regulation	miRNA	hsa-let-7c	14	10	3	0.121951	0.344405	8.35659	6.45572e-17	1.79308e-10	ACTA1;CASP3;FASLG
504	stress induction of hsp regulation	miRNA	hsa-let-7d-5p	14	10	3	0.121951	0.344405	8.35659	6.45572e-17	1.79308e-10	ACTA1;CASP3;FASLG
505	stress induction of hsp regulation	miRNA	hsa-let-7g-5p	14	10	3	0.121951	0.344405	8.35659	6.45572e-17	1.79308e-10	ACTA1;CASP3;FASLG
506	stress induction of hsp regulation	miRNA	hsa-let-7i-5p	14	10	3	0.121951	0.344405	8.35659	6.45572e-17	1.79308e-10	ACTA1;CASP3;FASLG
507	stress induction of hsp regulation	miRNA	hsa-miR-98	14	10	3	0.121951	0.344405	8.35659	6.45572e-17	1.79308e-10	ACTA1;CASP3;FASLG
508	sumoylation by ranbp2 regulates transcriptional repression	miRNA	hsa-miR-3163	14	10	5	0.454163	0.636304	7.14413	9.05677e-13	2.51552e-06	HDAC1;HDAC9;NUP153;RAN;SUMO1
509	t cell receptor signaling pathway	miRNA	hsa-let-7f-2-3p	53	32	9	1.54499	1.18272	6.30327	2.91431e-10	0.000809451	ARAP2;ARHGAP5;ARHGAP6;ASAP1;ASAP2;MAP2K4;MAP3K1;PPP3CA;SHC1
510	t cell receptor signaling pathway	miRNA	hsa-miR-19a-3p	53	32	9	1.54499	1.18272	6.30327	2.91431e-10	0.000809451	ARAP2;ARHGAP1;ARHGAP5;ASAP2;MAP3K1;PIK3CA;PRKCA;PRKCB;RAF1
511	t cell receptor signaling pathway	miRNA	hsa-miR-30e-5p	53	32	10	1.54499	1.18272	7.14878	8.75525e-13	2.43177e-06	ARAP2;ASAP1;CHN1;MAP2K4;MAP3K1;PLCG1;PPP3CA;PPP3CB;PRKCB;SOS1
512	t cell receptor signaling pathway	miRNA	hsa-miR-429	53	32	9	1.54499	1.18272	6.30327	2.91431e-10	0.000809451	ARHGAP6;ASAP1;FYN;MAP3K1;PLCG1;PRKCA;PRKCB;RAC1;SHC1
513	tgf beta signaling pathway	miRNA	hsa-let-7a-3p	20	16	7	0.73339	0.826186	7.58499	3.32513e-14	9.23556e-08	CREBBP;NR2C2;SMAD4;SMAD7;TGFB2;TGFB3;TGFBR1
514	tgf beta signaling pathway	miRNA	hsa-miR-106a-5p	20	16	6	0.73339	0.826186	6.3746	1.83441e-10	0.000509508	EP300;MAP2K1;MAP3K7;SMAD4;SMAD7;TGFBR2
515	tgf beta signaling pathway	miRNA	hsa-miR-17-5p	20	16	6	0.73339	0.826186	6.3746	1.83441e-10	0.000509508	EP300;MAP2K1;MAP3K7;SMAD4;SMAD7;TGFBR2
516	tgf beta signaling pathway	miRNA	hsa-miR-410	20	16	6	0.73339	0.826186	6.3746	1.83441e-10	0.000509508	CREBBP;EP300;SKIL;SMAD7;TGFBR1;TGFBR2
517	tgf beta signaling pathway	miRNA	hsa-miR-424-5p	20	16	6	0.73339	0.826186	6.3746	1.83441e-10	0.000509508	MAP2K1;MAP3K7;NR2C2;SKIL;SMAD7;TGFBR2
518	the 41bb-dependent immune response	miRNA	hsa-miR-19a-3p	13	12	3	0.174937	0.408781	6.91094	4.81453e-12	1.33724e-05	MAP2K3;MAP3K5;MAPK14
519	the 41bb-dependent immune response	miRNA	hsa-miR-30a-3p	13	12	3	0.174937	0.408781	6.91094	4.81453e-12	1.33724e-05	ATF2;JUN;MAP3K5
520	the igf-1 receptor and longevity	miRNA	hsa-miR-410	16	11	6	0.616485	0.753701	7.14277	9.14686e-13	2.54054e-06	GRB2;IGF1;IGF1R;IRS1;PDPK1;SOS1
521	the information processing pathway at the ifn beta enhancer	miRNA	hsa-miR-3163	29	24	7	0.788057	0.844262	7.35784	1.8691e-13	5.19143e-07	ATF2;GTF2A1;IRF1;IRF2;KAT2B;NR3C1;POLR2A
522	the information processing pathway at the ifn beta enhancer	miRNA	hsa-miR-335-3p	29	24	6	0.788057	0.844262	6.17337	6.68495e-10	0.00185675	ARID1A;ATF2;CREBBP;IRF2;KAT2B;NR3C1
523	the information processing pathway at the ifn beta enhancer	miRNA	hsa-miR-340-5p	29	24	6	0.788057	0.844262	6.17337	6.68495e-10	0.00185675	ARID1A;ATF2;CREBBP;GTF2A1;IRF2;SMARCC2
524	the information processing pathway at the ifn beta enhancer	miRNA	hsa-miR-493-5p	29	24	6	0.788057	0.844262	6.17337	6.68495e-10	0.00185675	ARID1A;CREBBP;IRF1;IRF2;JUN;SMARCC1
525	the information processing pathway at the ifn beta enhancer	miRNA	hsa-miR-548d-3p	29	24	6	0.788057	0.844262	6.17337	6.68495e-10	0.00185675	ARID1A;ATF2;CREBBP;KAT2B;SMARCB1;SMARCC2
526	the information processing pathway at the ifn beta enhancer	miRNA	hsa-miR-9-3p	29	24	6	0.788057	0.844262	6.17337	6.68495e-10	0.00185675	ARID1A;IRF2;KAT2B;NR3C1;SMARCC1;SMARCE1
527	the prc2 complex sets long-term gene silencing through modification of histone tails	miRNA	hsa-miR-340-5p	14	13	6	0.703953	0.799095	6.62756	3.41281e-11	9.47909e-05	BMI1;H3F3A;H3F3B;PHC1;SUZ12;YY1
528	thrombin signaling and protease-activated receptors	miRNA	hsa-miR-493-5p	27	20	8	1.16821	1.02131	6.68923	2.24348e-11	6.23127e-05	ARFGEF1;CYTH3;GNAI1;GNB1;PIK3R1;PLCB1;PRKCA;ROCK1
529	tnf/stress related signaling	miRNA	hsa-miR-23c	23	15	5	0.56518	0.710893	6.23837	4.42154e-10	0.00122808	CHUK;MAP2K4;MAP3K1;MAP4K4;MAPK14
530	tnf/stress related signaling	miRNA	hsa-miR-30a-5p	23	15	6	0.56518	0.710893	7.64506	2.08848e-14	5.80076e-08	ATF1;BAG4;MAP2K4;MAP3K1;MAP4K4;TANK
531	tnf/stress related signaling	miRNA	hsa-miR-30b-5p	23	15	6	0.56518	0.710893	7.64506	2.08848e-14	5.80076e-08	ATF1;BAG4;MAP2K4;MAP3K1;MAP4K4;TANK
532	tnf/stress related signaling	miRNA	hsa-miR-30d-5p	23	15	6	0.56518	0.710893	7.64506	2.08848e-14	5.80076e-08	ATF1;BAG4;MAP2K4;MAP3K1;MAP4K4;TANK
533	tnf/stress related signaling	miRNA	hsa-miR-30e-5p	23	15	6	0.56518	0.710893	7.64506	2.08848e-14	5.80076e-08	ATF1;MAP2K4;MAP2K6;MAP3K1;MAP4K4;TANK
534	tpo signaling pathway	miRNA	hsa-miR-548l	24	20	6	0.738436	0.828425	6.35129	2.13517e-10	0.000593044	CSNK2A1;PRKCB;RASA1;SOS1;STAT3;STAT5B
535	transcription factor creb and its extracellular signals	miRNA	hsa-miR-106b-5p	27	22	7	1.03196	0.976728	6.11024	9.94814e-10	0.0027631	CREB1;MAPK1;PIK3R1;PRKACB;PRKAR1A;RPS6KA1;RPS6KA5
536	transcription factor creb and its extracellular signals	miRNA	hsa-miR-19a-3p	27	22	8	1.03196	0.976728	7.13406	9.74508e-13	2.7067e-06	CAMK2G;MAPK1;MAPK14;PIK3CA;PRKACB;PRKCA;PRKCB;RPS6KA5
537	transcription factor creb and its extracellular signals	miRNA	hsa-miR-20a-5p	27	22	8	1.03196	0.976728	7.13406	9.74508e-13	2.7067e-06	CAMK2G;CREB1;PIK3R1;PRKACB;PRKAR1A;RPS6KA1;RPS6KA5;SOS1
538	transcription regulation by methyltransferase of carm1	miRNA	hsa-miR-429	14	11	6	0.699747	0.799289	6.63121	3.32946e-11	9.24759e-05	CREBBP;EP300;NCOA3;PRKACB;PRKAR1A;PRKAR2B
539	trefoil factors initiate mucosal healing	miRNA	hsa-miR-15a-5p	36	23	6	0.739277	0.832745	6.31733	2.66121e-10	0.000739152	GHR;IKBKB;MAP2K1;PIK3R1;RAF1;SOS1
540	trefoil factors initiate mucosal healing	miRNA	hsa-miR-16-5p	36	23	6	0.739277	0.832745	6.31733	2.66121e-10	0.000739152	GHR;IKBKB;MAP2K1;PIK3R1;RAF1;SOS1
541	trefoil factors initiate mucosal healing	miRNA	hsa-miR-195-5p	36	23	6	0.739277	0.832745	6.31733	2.66121e-10	0.000739152	GHR;IKBKB;MAP2K1;PIK3R1;RAF1;SOS1
542	trefoil factors initiate mucosal healing	miRNA	hsa-miR-424-5p	36	23	6	0.739277	0.832745	6.31733	2.66121e-10	0.000739152	GHR;IKBKB;MAP2K1;PIK3R1;RAF1;SOS1
543	trefoil factors initiate mucosal healing	miRNA	hsa-miR-548d-3p	36	23	6	0.739277	0.832745	6.31733	2.66121e-10	0.000739152	CASP3;CHUK;GHR;GRB2;RAF1;RHOA
544	tsp-1 induced apoptosis in microvascular endothelial cell	miRNA	hsa-miR-155-5p	7	5	2	0.105971	0.317562	5.96427	2.4573e-09	0.00682516	FOS;FYN
545	tsp-1 induced apoptosis in microvascular endothelial cell	miRNA	hsa-miR-3148	7	5	2	0.105971	0.317562	5.96427	2.4573e-09	0.00682516	FOS;FYN
546	tsp-1 induced apoptosis in microvascular endothelial cell	miRNA	hsa-miR-369-3p	7	5	2	0.105971	0.317562	5.96427	2.4573e-09	0.00682516	FOS;FYN
547	tsp-1 induced apoptosis in microvascular endothelial cell	miRNA	hsa-miR-548d-3p	7	5	2	0.105971	0.317562	5.96427	2.4573e-09	0.00682516	CASP3;FOS
548	tumor suppressor arf inhibits ribosomal biogenesis	miRNA	hsa-miR-106b-5p	23	16	5	0.407906	0.622216	7.38022	1.58028e-13	4.38923e-07	ABL1;E2F1;PIK3R1;RB1;TWIST1
549	tumor suppressor arf inhibits ribosomal biogenesis	miRNA	hsa-miR-17-5p	23	16	5	0.407906	0.622216	7.38022	1.58028e-13	4.38923e-07	E2F1;MYC;PIK3R1;RB1;TWIST1
550	tumor suppressor arf inhibits ribosomal biogenesis	miRNA	hsa-miR-20a-5p	23	16	5	0.407906	0.622216	7.38022	1.58028e-13	4.38923e-07	E2F1;MYC;PIK3R1;RB1;TWIST1
551	tumor suppressor arf inhibits ribosomal biogenesis	miRNA	hsa-miR-519a-3p	23	16	5	0.407906	0.622216	7.38022	1.58028e-13	4.38923e-07	ABL1;E2F1;PIK3CA;PIK3R1;RB1
552	tumor suppressor arf inhibits ribosomal biogenesis	miRNA	hsa-miR-519b-3p	23	16	5	0.407906	0.622216	7.38022	1.58028e-13	4.38923e-07	ABL1;E2F1;PIK3CA;PIK3R1;RB1
553	tumor suppressor arf inhibits ribosomal biogenesis	miRNA	hsa-miR-9-3p	23	16	7	0.407906	0.622216	10.5945	3.16025e-26	8.77761e-20	E2F1;PIK3CA;PIK3R1;RAC1;RB1;TBX2;UBE2A
554	ucalpain and friends in cell spread	miRNA	hsa-miR-3609	17	14	4	0.347351	0.5751	6.35133	2.13461e-10	0.000592889	ACTN1;ITGB1;PTK2;RHOA
555	ucalpain and friends in cell spread	miRNA	hsa-miR-3662	17	14	4	0.347351	0.5751	6.35133	2.13461e-10	0.000592889	ACTA1;ACTN1;ITGB1;RHOA
556	ucalpain and friends in cell spread	miRNA	hsa-miR-495	17	14	4	0.347351	0.5751	6.35133	2.13461e-10	0.000592889	ACTA1;ACTN1;PTK2;RAC1
557	ucalpain and friends in cell spread	miRNA	hsa-miR-9-5p	17	14	4	0.347351	0.5751	6.35133	2.13461e-10	0.000592889	ACTN2;ACTN4;SRC;TLN1
558	vegf hypoxia and angiogenesis	miRNA	hsa-miR-148b-3p	30	21	7	1	0.957948	6.26339	3.76697e-10	0.00104628	ARNT;CSK;HIF1A;PDPK1;PIK3CA;PIK3R1;SOS1
559	vegf hypoxia and angiogenesis	miRNA	hsa-miR-200b-3p	30	21	7	1	0.957948	6.26339	3.76697e-10	0.00104628	FLT1;KDR;PLCG1;PRKCA;PRKCB;SHC1;VEGFA
560	vegf hypoxia and angiogenesis	miRNA	hsa-miR-410	30	21	7	1	0.957948	6.26339	3.76697e-10	0.00104628	FLT1;GRB2;KDR;PDPK1;PTK2;SOS1;VEGFA
561	vegf hypoxia and angiogenesis	miRNA	hsa-miR-429	30	21	7	1	0.957948	6.26339	3.76697e-10	0.00104628	FLT1;KDR;PLCG1;PRKCA;PRKCB;SHC1;VEGFA
562	wnt signaling pathway	miRNA	hsa-let-7f-2-3p	30	23	8	1.15391	1.01755	6.72799	1.72023e-11	4.77795e-05	CREBBP;DKK1;GSK3B;HDAC1;LRP6;NLK;TLE1;WIF1
563	wnt signaling pathway	miRNA	hsa-miR-497-5p	30	23	8	1.15391	1.01755	6.72799	1.72023e-11	4.77795e-05	BTRC;CCND1;DKK1;DVL1;LRP6;MAP3K7;NKD1;WIF1
564	-arrestins in gpcr desensitization	ceRNA	ACVR1	28	11	2	0.0437897	0.208373	9.38801	6.11445e-21	6.98028e-14	CXCL12;EDNRA
565	-arrestins in gpcr desensitization	ceRNA	ANK2	28	11	2	0.0437897	0.208373	9.38801	6.11445e-21	6.98028e-14	EDNRB;GNB1
566	-arrestins in gpcr desensitization	ceRNA	ARID5B	28	11	2	0.0437897	0.208373	9.38801	6.11445e-21	6.98028e-14	CXCL12;EDN1
567	-arrestins in gpcr desensitization	ceRNA	ATXN1	28	11	2	0.0437897	0.208373	9.38801	6.11445e-21	6.98028e-14	CXCL12;HTR2C
568	-arrestins in gpcr desensitization	ceRNA	BCL11A	28	11	2	0.0437897	0.208373	9.38801	6.11445e-21	6.98028e-14	CXCL12;EDNRB
569	-arrestins in gpcr desensitization	ceRNA	BMP6	28	11	2	0.0437897	0.208373	9.38801	6.11445e-21	6.98028e-14	CXCL12;EDNRB
570	-arrestins in gpcr desensitization	ceRNA	CPEB4	28	11	2	0.0437897	0.208373	9.38801	6.11445e-21	6.98028e-14	CXCL12;GNB1
571	-arrestins in gpcr desensitization	ceRNA	CREBRF	28	11	2	0.0437897	0.208373	9.38801	6.11445e-21	6.98028e-14	CXCL12;GNB1
572	-arrestins in gpcr desensitization	ceRNA	DMD	28	11	2	0.0437897	0.208373	9.38801	6.11445e-21	6.98028e-14	ADRB2;EDN1
573	-arrestins in gpcr desensitization	ceRNA	ERBB4	28	11	2	0.0437897	0.208373	9.38801	6.11445e-21	6.98028e-14	CXCL12;EDN1
574	-arrestins in gpcr desensitization	ceRNA	FAT3	28	11	2	0.0437897	0.208373	9.38801	6.11445e-21	6.98028e-14	CXCL12;GNB1
575	-arrestins in gpcr desensitization	ceRNA	FOXO1	28	11	2	0.0437897	0.208373	9.38801	6.11445e-21	6.98028e-14	ADRB2;GNB1
576	-arrestins in gpcr desensitization	ceRNA	GJA1	28	11	2	0.0437897	0.208373	9.38801	6.11445e-21	6.98028e-14	CXCL12;EDN1
577	-arrestins in gpcr desensitization	ceRNA	LCOR	28	11	2	0.0437897	0.208373	9.38801	6.11445e-21	6.98028e-14	CXCL12;GNB1
578	-arrestins in gpcr desensitization	ceRNA	LRCH2	28	11	2	0.0437897	0.208373	9.38801	6.11445e-21	6.98028e-14	CXCL12;EDNRA
579	-arrestins in gpcr desensitization	ceRNA	MET	28	11	2	0.0437897	0.208373	9.38801	6.11445e-21	6.98028e-14	CXCL12;EDN1
580	-arrestins in gpcr desensitization	ceRNA	PFN2	28	11	2	0.0437897	0.208373	9.38801	6.11445e-21	6.98028e-14	GNB1;HTR2C
581	-arrestins in gpcr desensitization	ceRNA	PRDM8	28	11	2	0.0437897	0.208373	9.38801	6.11445e-21	6.98028e-14	CXCR4;EDNRB
582	-arrestins in gpcr desensitization	ceRNA	RUNX2	28	11	2	0.0437897	0.208373	9.38801	6.11445e-21	6.98028e-14	CXCL12;EDNRB
583	-arrestins in gpcr desensitization	ceRNA	SNRK	28	11	2	0.0437897	0.208373	9.38801	6.11445e-21	6.98028e-14	CXCR4;EDNRB
584	-arrestins in gpcr desensitization	ceRNA	TOX	28	11	3	0.0437897	0.208373	14.1871	1.10119e-45	1.25712e-38	CXCL12;CXCR4;EDNRB
585	-arrestins in gpcr desensitization	ceRNA	ZEB2	28	11	2	0.0437897	0.208373	9.38801	6.11445e-21	6.98028e-14	CXCL12;GNB1
586	-arrestins in gpcr desensitization	ceRNA	ZFPM2	28	11	2	0.0437897	0.208373	9.38801	6.11445e-21	6.98028e-14	CXCL12;GNB1
587	actions of nitric oxide in the heart	ceRNA	AFF4	41	20	3	0.174749	0.414447	6.81691	9.30195e-12	0.000106191	PDPK1;PIK3R1;PRKG1
588	actions of nitric oxide in the heart	ceRNA	ANK2	41	20	3	0.174749	0.414447	6.81691	9.30195e-12	0.000106191	GNB1;KDR;PDE3B
589	actions of nitric oxide in the heart	ceRNA	ARHGAP20	41	20	3	0.174749	0.414447	6.81691	9.30195e-12	0.000106191	KDR;PIK3R1;PRKACB
590	actions of nitric oxide in the heart	ceRNA	ARID5B	41	20	3	0.174749	0.414447	6.81691	9.30195e-12	0.000106191	PIK3CA;PIK3R1;PRKAR1A
591	actions of nitric oxide in the heart	ceRNA	BCL11A	41	20	3	0.174749	0.414447	6.81691	9.30195e-12	0.000106191	PRKAR1A;RYR2;VEGFA
592	actions of nitric oxide in the heart	ceRNA	BNC2	41	20	5	0.174749	0.414447	11.6426	2.50268e-31	2.85707e-24	GUCY1A3;PIK3CA;PIK3R1;PRKACB;PRKAR1A
593	actions of nitric oxide in the heart	ceRNA	CAND1	41	20	3	0.174749	0.414447	6.81691	9.30195e-12	0.000106191	GNB1;PIK3CA;PRKAR1A
594	actions of nitric oxide in the heart	ceRNA	CDK17	41	20	3	0.174749	0.414447	6.81691	9.30195e-12	0.000106191	GNB1;PRKACB;RYR2
595	actions of nitric oxide in the heart	ceRNA	CELF2	41	20	5	0.174749	0.414447	11.6426	2.50268e-31	2.85707e-24	FLT1;PDE3B;PIK3R1;PRKACB;PRKAR1A
596	actions of nitric oxide in the heart	ceRNA	CPEB2	41	20	3	0.174749	0.414447	6.81691	9.30195e-12	0.000106191	GNB1;PRKACB;PRKAR2B
597	actions of nitric oxide in the heart	ceRNA	CPEB4	41	20	3	0.174749	0.414447	6.81691	9.30195e-12	0.000106191	GNB1;PIK3CA;PRKACB
598	actions of nitric oxide in the heart	ceRNA	CREBRF	41	20	6	0.174749	0.414447	14.0555	7.12767e-45	8.13697e-38	GNB1;KDR;PDE3B;PIK3R1;PRKAR1A;PRKG1
599	actions of nitric oxide in the heart	ceRNA	DDX3X	41	20	3	0.174749	0.414447	6.81691	9.30195e-12	0.000106191	GNAQ;PIK3CA;PRKG1
600	actions of nitric oxide in the heart	ceRNA	DYRK2	41	20	4	0.174749	0.414447	9.22977	2.71214e-20	3.09619e-13	PDE3B;PRKACB;PRKAR1A;PRKG1
601	actions of nitric oxide in the heart	ceRNA	ELK3	41	20	5	0.174749	0.414447	11.6426	2.50268e-31	2.85707e-24	CAV1;FLT1;GUCY1A3;PRKACB;RYR2
602	actions of nitric oxide in the heart	ceRNA	FAM91A1	41	20	3	0.174749	0.414447	6.81691	9.30195e-12	0.000106191	GNB1;PRKAR2A;PRKG1
603	actions of nitric oxide in the heart	ceRNA	FMR1	41	20	3	0.174749	0.414447	6.81691	9.30195e-12	0.000106191	PDPK1;PIK3CA;PRKAR1A
604	actions of nitric oxide in the heart	ceRNA	FNDC3B	41	20	4	0.174749	0.414447	9.22977	2.71214e-20	3.09619e-13	FLT1;PRKACB;PRKAR1A;RYR2
605	actions of nitric oxide in the heart	ceRNA	FOXO1	41	20	3	0.174749	0.414447	6.81691	9.30195e-12	0.000106191	GNB1;PDE3B;PIK3R1
606	actions of nitric oxide in the heart	ceRNA	FOXP1	41	20	4	0.174749	0.414447	9.22977	2.71214e-20	3.09619e-13	PIK3CA;PIK3R1;PRKACB;VEGFA
607	actions of nitric oxide in the heart	ceRNA	FOXP2	41	20	4	0.174749	0.414447	9.22977	2.71214e-20	3.09619e-13	GNB1;PRKACB;PRKG1;RYR2
608	actions of nitric oxide in the heart	ceRNA	L3MBTL3	41	20	3	0.174749	0.414447	6.81691	9.30195e-12	0.000106191	GUCY1A3;PRKACB;RYR2
609	actions of nitric oxide in the heart	ceRNA	LHFP	41	20	4	0.174749	0.414447	9.22977	2.71214e-20	3.09619e-13	FLT1;GUCY1A3;KDR;PIK3R1
610	actions of nitric oxide in the heart	ceRNA	LRCH1	41	20	3	0.174749	0.414447	6.81691	9.30195e-12	0.000106191	GNB1;PRKACB;RYR2
611	actions of nitric oxide in the heart	ceRNA	MIER3	41	20	3	0.174749	0.414447	6.81691	9.30195e-12	0.000106191	GNB1;PIK3CA;PRKAR2B
612	actions of nitric oxide in the heart	ceRNA	NEK9	41	20	3	0.174749	0.414447	6.81691	9.30195e-12	0.000106191	PIK3CA;PRKACB;RYR2
613	actions of nitric oxide in the heart	ceRNA	NFIB	41	20	4	0.174749	0.414447	9.22977	2.71214e-20	3.09619e-13	PIK3CA;PIK3R1;PRKACB;RYR2
614	actions of nitric oxide in the heart	ceRNA	PTEN	41	20	3	0.174749	0.414447	6.81691	9.30195e-12	0.000106191	PIK3R1;PRKACB;PRKAR1A
615	actions of nitric oxide in the heart	ceRNA	RBMS1	41	20	3	0.174749	0.414447	6.81691	9.30195e-12	0.000106191	CAV1;PIK3R1;RYR2
616	actions of nitric oxide in the heart	ceRNA	RGMA	41	20	3	0.174749	0.414447	6.81691	9.30195e-12	0.000106191	GUCY1A3;PRKACB;RYR2
617	actions of nitric oxide in the heart	ceRNA	SEMA6D	41	20	5	0.174749	0.414447	11.6426	2.50268e-31	2.85707e-24	CAV1;GNAQ;GNB1;PRKAR1A;RYR2
618	actions of nitric oxide in the heart	ceRNA	TCF4	41	20	7	0.174749	0.414447	16.4683	6.1988e-61	7.07657e-54	CAV1;FLT1;GNB1;PIK3R1;PRKACB;RYR2;VEGFA
619	actions of nitric oxide in the heart	ceRNA	TGFBR2	41	20	5	0.174749	0.414447	11.6426	2.50268e-31	2.85707e-24	GUCY1A3;PDE3B;PIK3CA;PIK3R1;PRKACB
620	actions of nitric oxide in the heart	ceRNA	TMEFF1	41	20	3	0.174749	0.414447	6.81691	9.30195e-12	0.000106191	FLT1;PDE3A;RYR2
621	actions of nitric oxide in the heart	ceRNA	TSHZ3	41	20	4	0.174749	0.414447	9.22977	2.71214e-20	3.09619e-13	GUCY1A3;PIK3CA;PRKACB;RYR2
622	actions of nitric oxide in the heart	ceRNA	ZC3H12C	41	20	3	0.174749	0.414447	6.81691	9.30195e-12	0.000106191	GUCY1A3;PRKACB;PRKAR1A
623	actions of nitric oxide in the heart	ceRNA	ZEB2	41	20	5	0.174749	0.414447	11.6426	2.50268e-31	2.85707e-24	CAV1;GNB1;KDR;PRKACB;PRKAR1A
624	actions of nitric oxide in the heart	ceRNA	ZFPM2	41	20	6	0.174749	0.414447	14.0555	7.12767e-45	8.13697e-38	FLT1;GNB1;GUCY1A3;PIK3R1;PRKACB;RYR2
625	actions of nitric oxide in the heart	ceRNA	ZNF148	41	20	3	0.174749	0.414447	6.81691	9.30195e-12	0.000106191	GNB1;PRKAR1A;RYR2
626	activation of camp-dependent protein kinase pka	ceRNA	ARID5B	29	14	3	0.103335	0.318425	9.09685	9.29897e-20	1.06157e-12	CXCL12;EDN1;PRKAR1A
627	activation of camp-dependent protein kinase pka	ceRNA	ATXN1	29	14	3	0.103335	0.318425	9.09685	9.29897e-20	1.06157e-12	CXCL12;HTR2C;PRKAR1A
628	activation of camp-dependent protein kinase pka	ceRNA	BCL11A	29	14	3	0.103335	0.318425	9.09685	9.29897e-20	1.06157e-12	CXCL12;EDNRB;PRKAR1A
629	activation of camp-dependent protein kinase pka	ceRNA	BNC2	29	14	3	0.103335	0.318425	9.09685	9.29897e-20	1.06157e-12	CXCL12;PRKACB;PRKAR1A
630	activation of camp-dependent protein kinase pka	ceRNA	CPEB2	29	14	3	0.103335	0.318425	9.09685	9.29897e-20	1.06157e-12	GNB1;PRKACB;PRKAR2B
631	activation of camp-dependent protein kinase pka	ceRNA	CPEB4	29	14	3	0.103335	0.318425	9.09685	9.29897e-20	1.06157e-12	CXCL12;GNB1;PRKACB
632	activation of camp-dependent protein kinase pka	ceRNA	CREBRF	29	14	3	0.103335	0.318425	9.09685	9.29897e-20	1.06157e-12	CXCL12;GNB1;PRKAR1A
633	activation of camp-dependent protein kinase pka	ceRNA	FAT3	29	14	3	0.103335	0.318425	9.09685	9.29897e-20	1.06157e-12	CXCL12;GNB1;PRKACB
634	activation of camp-dependent protein kinase pka	ceRNA	LCOR	29	14	3	0.103335	0.318425	9.09685	9.29897e-20	1.06157e-12	CXCL12;GNB1;PRKAR1A
635	activation of camp-dependent protein kinase pka	ceRNA	LRCH2	29	14	3	0.103335	0.318425	9.09685	9.29897e-20	1.06157e-12	CXCL12;EDNRA;PRKACB
636	activation of camp-dependent protein kinase pka	ceRNA	MET	29	14	3	0.103335	0.318425	9.09685	9.29897e-20	1.06157e-12	CXCL12;EDN1;PRKACB
637	activation of camp-dependent protein kinase pka	ceRNA	SNRK	29	14	3	0.103335	0.318425	9.09685	9.29897e-20	1.06157e-12	CXCR4;EDNRB;PRKACB
638	activation of camp-dependent protein kinase pka	ceRNA	TOX	29	14	4	0.103335	0.318425	12.2373	1.9646e-34	2.24279e-27	CXCL12;CXCR4;EDNRB;PRKACB
639	activation of camp-dependent protein kinase pka	ceRNA	ZEB2	29	14	4	0.103335	0.318425	12.2373	1.9646e-34	2.24279e-27	CXCL12;GNB1;PRKACB;PRKAR1A
640	activation of camp-dependent protein kinase pka	ceRNA	ZFPM2	29	14	3	0.103335	0.318425	9.09685	9.29897e-20	1.06157e-12	CXCL12;GNB1;PRKACB
641	activation of csk by camp-dependent protein kinase inhibits signaling through the t cell receptor	ceRNA	ABI1	41	16	3	0.15531	0.388187	7.32815	2.33351e-13	2.66394e-06	CREBBP;CXCL12;PRKAR1A
642	activation of csk by camp-dependent protein kinase inhibits signaling through the t cell receptor	ceRNA	ARID5B	41	16	3	0.15531	0.388187	7.32815	2.33351e-13	2.66394e-06	CXCL12;EDN1;PRKAR1A
643	activation of csk by camp-dependent protein kinase inhibits signaling through the t cell receptor	ceRNA	ATXN1	41	16	3	0.15531	0.388187	7.32815	2.33351e-13	2.66394e-06	CXCL12;HTR2C;PRKAR1A
644	activation of csk by camp-dependent protein kinase inhibits signaling through the t cell receptor	ceRNA	BCL11A	41	16	3	0.15531	0.388187	7.32815	2.33351e-13	2.66394e-06	CXCL12;EDNRB;PRKAR1A
645	activation of csk by camp-dependent protein kinase inhibits signaling through the t cell receptor	ceRNA	BNC2	41	16	3	0.15531	0.388187	7.32815	2.33351e-13	2.66394e-06	CXCL12;PRKACB;PRKAR1A
646	activation of csk by camp-dependent protein kinase inhibits signaling through the t cell receptor	ceRNA	CAND1	41	16	3	0.15531	0.388187	7.32815	2.33351e-13	2.66394e-06	CREBBP;GNB1;PRKAR1A
647	activation of csk by camp-dependent protein kinase inhibits signaling through the t cell receptor	ceRNA	CDK17	41	16	3	0.15531	0.388187	7.32815	2.33351e-13	2.66394e-06	CREBBP;GNB1;PRKACB
648	activation of csk by camp-dependent protein kinase inhibits signaling through the t cell receptor	ceRNA	CELF2	41	16	3	0.15531	0.388187	7.32815	2.33351e-13	2.66394e-06	CREBBP;PRKACB;PRKAR1A
649	activation of csk by camp-dependent protein kinase inhibits signaling through the t cell receptor	ceRNA	CPEB2	41	16	3	0.15531	0.388187	7.32815	2.33351e-13	2.66394e-06	GNB1;PRKACB;PRKAR2B
650	activation of csk by camp-dependent protein kinase inhibits signaling through the t cell receptor	ceRNA	CPEB4	41	16	3	0.15531	0.388187	7.32815	2.33351e-13	2.66394e-06	CXCL12;GNB1;PRKACB
651	activation of csk by camp-dependent protein kinase inhibits signaling through the t cell receptor	ceRNA	CREBRF	41	16	4	0.15531	0.388187	9.90423	3.99032e-23	4.55536e-16	CREBBP;CXCL12;GNB1;PRKAR1A
652	activation of csk by camp-dependent protein kinase inhibits signaling through the t cell receptor	ceRNA	CTDSPL2	41	16	3	0.15531	0.388187	7.32815	2.33351e-13	2.66394e-06	CREBBP;GNB1;PRKAR1A
653	activation of csk by camp-dependent protein kinase inhibits signaling through the t cell receptor	ceRNA	ELK3	41	16	3	0.15531	0.388187	7.32815	2.33351e-13	2.66394e-06	CREBBP;CXCL12;PRKACB
654	activation of csk by camp-dependent protein kinase inhibits signaling through the t cell receptor	ceRNA	FAT3	41	16	3	0.15531	0.388187	7.32815	2.33351e-13	2.66394e-06	CXCL12;GNB1;PRKACB
655	activation of csk by camp-dependent protein kinase inhibits signaling through the t cell receptor	ceRNA	FOXO1	41	16	3	0.15531	0.388187	7.32815	2.33351e-13	2.66394e-06	ADRB2;CREBBP;GNB1
656	activation of csk by camp-dependent protein kinase inhibits signaling through the t cell receptor	ceRNA	LCOR	41	16	4	0.15531	0.388187	9.90423	3.99032e-23	4.55536e-16	CREBBP;CXCL12;GNB1;PRKAR1A
657	activation of csk by camp-dependent protein kinase inhibits signaling through the t cell receptor	ceRNA	LRCH2	41	16	3	0.15531	0.388187	7.32815	2.33351e-13	2.66394e-06	CXCL12;EDNRA;PRKACB
658	activation of csk by camp-dependent protein kinase inhibits signaling through the t cell receptor	ceRNA	MAP3K1	41	16	3	0.15531	0.388187	7.32815	2.33351e-13	2.66394e-06	CREBBP;GNB1;PRKAR1A
659	activation of csk by camp-dependent protein kinase inhibits signaling through the t cell receptor	ceRNA	MET	41	16	3	0.15531	0.388187	7.32815	2.33351e-13	2.66394e-06	CXCL12;EDN1;PRKACB
660	activation of csk by camp-dependent protein kinase inhibits signaling through the t cell receptor	ceRNA	PTEN	41	16	3	0.15531	0.388187	7.32815	2.33351e-13	2.66394e-06	CREBBP;PRKACB;PRKAR1A
661	activation of csk by camp-dependent protein kinase inhibits signaling through the t cell receptor	ceRNA	SNRK	41	16	3	0.15531	0.388187	7.32815	2.33351e-13	2.66394e-06	CXCR4;EDNRB;PRKACB
662	activation of csk by camp-dependent protein kinase inhibits signaling through the t cell receptor	ceRNA	TCF4	41	16	3	0.15531	0.388187	7.32815	2.33351e-13	2.66394e-06	CREBBP;GNB1;PRKACB
663	activation of csk by camp-dependent protein kinase inhibits signaling through the t cell receptor	ceRNA	TET3	41	16	3	0.15531	0.388187	7.32815	2.33351e-13	2.66394e-06	CREBBP;GNB1;PRKACB
664	activation of csk by camp-dependent protein kinase inhibits signaling through the t cell receptor	ceRNA	TOX	41	16	4	0.15531	0.388187	9.90423	3.99032e-23	4.55536e-16	CXCL12;CXCR4;EDNRB;PRKACB
665	activation of csk by camp-dependent protein kinase inhibits signaling through the t cell receptor	ceRNA	ZCCHC24	41	16	3	0.15531	0.388187	7.32815	2.33351e-13	2.66394e-06	CREBBP;CXCL12;PRKACB
666	activation of csk by camp-dependent protein kinase inhibits signaling through the t cell receptor	ceRNA	ZEB1	41	16	3	0.15531	0.388187	7.32815	2.33351e-13	2.66394e-06	CREBBP;CXCL12;PRKACB
667	activation of csk by camp-dependent protein kinase inhibits signaling through the t cell receptor	ceRNA	ZEB2	41	16	4	0.15531	0.388187	9.90423	3.99032e-23	4.55536e-16	CXCL12;GNB1;PRKACB;PRKAR1A
668	activation of csk by camp-dependent protein kinase inhibits signaling through the t cell receptor	ceRNA	ZFHX4	41	16	3	0.15531	0.388187	7.32815	2.33351e-13	2.66394e-06	CREBBP;CXCR4;PRKACB
669	activation of csk by camp-dependent protein kinase inhibits signaling through the t cell receptor	ceRNA	ZFPM2	41	16	4	0.15531	0.388187	9.90423	3.99032e-23	4.55536e-16	CREBBP;CXCL12;GNB1;PRKACB
670	activation of pkc through g-protein coupled receptors	ceRNA	ABI1	11	6	2	0.0773481	0.272806	7.04769	1.81912e-12	2.07671e-05	CXCL12;PLCB1
671	activation of pkc through g-protein coupled receptors	ceRNA	ACVR1	11	6	2	0.0773481	0.272806	7.04769	1.81912e-12	2.07671e-05	CXCL12;PLCB1
672	activation of pkc through g-protein coupled receptors	ceRNA	ARID5B	11	6	2	0.0773481	0.272806	7.04769	1.81912e-12	2.07671e-05	CXCL12;EDN1
673	activation of pkc through g-protein coupled receptors	ceRNA	ATXN1	11	6	2	0.0773481	0.272806	7.04769	1.81912e-12	2.07671e-05	CXCL12;PLCB1
674	activation of pkc through g-protein coupled receptors	ceRNA	BCL11A	11	6	3	0.0773481	0.272806	10.7133	8.8162e-27	1.00646e-19	CXCL12;PLCB1;PRKCB
675	activation of pkc through g-protein coupled receptors	ceRNA	BMP6	11	6	2	0.0773481	0.272806	7.04769	1.81912e-12	2.07671e-05	CXCL12;PLCB1
676	activation of pkc through g-protein coupled receptors	ceRNA	BNC2	11	6	3	0.0773481	0.272806	10.7133	8.8162e-27	1.00646e-19	CXCL12;PLCB1;PRKCB
677	activation of pkc through g-protein coupled receptors	ceRNA	CELF2	11	6	2	0.0773481	0.272806	7.04769	1.81912e-12	2.07671e-05	PLCB1;PRKCB
678	activation of pkc through g-protein coupled receptors	ceRNA	CNR1	11	6	3	0.0773481	0.272806	10.7133	8.8162e-27	1.00646e-19	CXCL12;PLCB1;PRKCB
679	activation of pkc through g-protein coupled receptors	ceRNA	CPEB1	11	6	2	0.0773481	0.272806	7.04769	1.81912e-12	2.07671e-05	CXCL12;PLCB1
680	activation of pkc through g-protein coupled receptors	ceRNA	DCLK1	11	6	2	0.0773481	0.272806	7.04769	1.81912e-12	2.07671e-05	CXCL12;PLCB1
681	activation of pkc through g-protein coupled receptors	ceRNA	EBF3	11	6	2	0.0773481	0.272806	7.04769	1.81912e-12	2.07671e-05	CXCL12;PLCB1
682	activation of pkc through g-protein coupled receptors	ceRNA	EGR1	11	6	2	0.0773481	0.272806	7.04769	1.81912e-12	2.07671e-05	CXCL12;PLCB1
683	activation of pkc through g-protein coupled receptors	ceRNA	ELK3	11	6	3	0.0773481	0.272806	10.7133	8.8162e-27	1.00646e-19	CXCL12;PLCB1;PRKCA
684	activation of pkc through g-protein coupled receptors	ceRNA	ERBB4	11	6	3	0.0773481	0.272806	10.7133	8.8162e-27	1.00646e-19	CXCL12;EDN1;PLCB1
685	activation of pkc through g-protein coupled receptors	ceRNA	FAT3	11	6	2	0.0773481	0.272806	7.04769	1.81912e-12	2.07671e-05	CXCL12;PLCB1
686	activation of pkc through g-protein coupled receptors	ceRNA	FOXN3	11	6	2	0.0773481	0.272806	7.04769	1.81912e-12	2.07671e-05	PLCB1;PRKCB
687	activation of pkc through g-protein coupled receptors	ceRNA	GJA1	11	6	3	0.0773481	0.272806	10.7133	8.8162e-27	1.00646e-19	CXCL12;EDN1;PLCB1
688	activation of pkc through g-protein coupled receptors	ceRNA	KLF6	11	6	2	0.0773481	0.272806	7.04769	1.81912e-12	2.07671e-05	CXCL12;PLCB1
689	activation of pkc through g-protein coupled receptors	ceRNA	KPNA3	11	6	2	0.0773481	0.272806	7.04769	1.81912e-12	2.07671e-05	GNAQ;PLCB1
690	activation of pkc through g-protein coupled receptors	ceRNA	LCOR	11	6	2	0.0773481	0.272806	7.04769	1.81912e-12	2.07671e-05	CXCL12;PLCB1
691	activation of pkc through g-protein coupled receptors	ceRNA	MAF	11	6	2	0.0773481	0.272806	7.04769	1.81912e-12	2.07671e-05	CXCL12;PRKCB
692	activation of pkc through g-protein coupled receptors	ceRNA	MBNL1	11	6	2	0.0773481	0.272806	7.04769	1.81912e-12	2.07671e-05	CXCL12;PLCB1
693	activation of pkc through g-protein coupled receptors	ceRNA	MET	11	6	3	0.0773481	0.272806	10.7133	8.8162e-27	1.00646e-19	CXCL12;EDN1;PLCB1
694	activation of pkc through g-protein coupled receptors	ceRNA	NOVA1	11	6	2	0.0773481	0.272806	7.04769	1.81912e-12	2.07671e-05	PLCB1;PRKCB
695	activation of pkc through g-protein coupled receptors	ceRNA	PDE7B	11	6	2	0.0773481	0.272806	7.04769	1.81912e-12	2.07671e-05	PLCB1;PRKCA
696	activation of pkc through g-protein coupled receptors	ceRNA	PDGFRA	11	6	2	0.0773481	0.272806	7.04769	1.81912e-12	2.07671e-05	EDN1;PLCB1
697	activation of pkc through g-protein coupled receptors	ceRNA	RRAGD	11	6	2	0.0773481	0.272806	7.04769	1.81912e-12	2.07671e-05	CXCL12;PLCB1
698	activation of pkc through g-protein coupled receptors	ceRNA	SATB1	11	6	2	0.0773481	0.272806	7.04769	1.81912e-12	2.07671e-05	CXCL12;PLCB1
699	activation of pkc through g-protein coupled receptors	ceRNA	SATB2	11	6	2	0.0773481	0.272806	7.04769	1.81912e-12	2.07671e-05	CXCL12;PLCB1
700	activation of pkc through g-protein coupled receptors	ceRNA	SEL1L3	11	6	2	0.0773481	0.272806	7.04769	1.81912e-12	2.07671e-05	PLCB1;PRKCB
701	activation of pkc through g-protein coupled receptors	ceRNA	SEMA6D	11	6	2	0.0773481	0.272806	7.04769	1.81912e-12	2.07671e-05	GNAQ;PLCB1
702	activation of pkc through g-protein coupled receptors	ceRNA	SETBP1	11	6	2	0.0773481	0.272806	7.04769	1.81912e-12	2.07671e-05	CXCL12;PLCB1
703	activation of pkc through g-protein coupled receptors	ceRNA	SOX6	11	6	2	0.0773481	0.272806	7.04769	1.81912e-12	2.07671e-05	CXCL12;PRKCB
704	activation of pkc through g-protein coupled receptors	ceRNA	SYT1	11	6	2	0.0773481	0.272806	7.04769	1.81912e-12	2.07671e-05	PLCB1;PRKCA
705	activation of pkc through g-protein coupled receptors	ceRNA	TCF4	11	6	3	0.0773481	0.272806	10.7133	8.8162e-27	1.00646e-19	PLCB1;PRKCA;PRKCB
706	activation of pkc through g-protein coupled receptors	ceRNA	TOX	11	6	3	0.0773481	0.272806	10.7133	8.8162e-27	1.00646e-19	CXCL12;PLCB1;PRKCB
707	activation of pkc through g-protein coupled receptors	ceRNA	ZEB1	11	6	3	0.0773481	0.272806	10.7133	8.8162e-27	1.00646e-19	CXCL12;PLCB1;PRKCA
708	activation of pkc through g-protein coupled receptors	ceRNA	ZEB2	11	6	4	0.0773481	0.272806	14.3789	7.02015e-47	8.01423e-40	CXCL12;PLCB1;PRKCA;PRKCB
709	activation of pkc through g-protein coupled receptors	ceRNA	ZFPM2	11	6	3	0.0773481	0.272806	10.7133	8.8162e-27	1.00646e-19	CXCL12;PLCB1;PRKCA
710	adp-ribosylation factor	ceRNA	ANKRD12	28	12	3	0.175772	0.412818	6.84134	7.84558e-12	8.95654e-05	ARFGEF1;ASAP1;RALBP1
711	adp-ribosylation factor	ceRNA	ARID4B	28	12	3	0.175772	0.412818	6.84134	7.84558e-12	8.95654e-05	ARHGAP5;ASAP1;ASAP2
712	adp-ribosylation factor	ceRNA	BBX	28	12	3	0.175772	0.412818	6.84134	7.84558e-12	8.95654e-05	ARFGEF1;ARHGAP5;ASAP1
713	adp-ribosylation factor	ceRNA	BIRC6	28	12	3	0.175772	0.412818	6.84134	7.84558e-12	8.95654e-05	ARAP2;ASAP1;ASAP2
714	adp-ribosylation factor	ceRNA	C11orf30	28	12	3	0.175772	0.412818	6.84134	7.84558e-12	8.95654e-05	ARFGEF1;ARFGEF2;ARHGAP5
715	adp-ribosylation factor	ceRNA	C16orf52	28	12	3	0.175772	0.412818	6.84134	7.84558e-12	8.95654e-05	ARFGEF2;ARHGAP5;ASAP1
716	adp-ribosylation factor	ceRNA	CAND1	28	12	3	0.175772	0.412818	6.84134	7.84558e-12	8.95654e-05	ARFGEF1;ARHGAP5;ASAP2
717	adp-ribosylation factor	ceRNA	CHD9	28	12	4	0.175772	0.412818	9.26371	1.9745e-20	2.2541e-13	ARAP2;ARFGEF1;ASAP1;ASAP2
718	adp-ribosylation factor	ceRNA	CPEB3	28	12	3	0.175772	0.412818	6.84134	7.84558e-12	8.95654e-05	ARFGEF1;ARHGAP5;ASAP1
719	adp-ribosylation factor	ceRNA	CPEB4	28	12	3	0.175772	0.412818	6.84134	7.84558e-12	8.95654e-05	ARFGEF1;ARHGAP5;ASAP1
720	adp-ribosylation factor	ceRNA	CPSF6	28	12	3	0.175772	0.412818	6.84134	7.84558e-12	8.95654e-05	ARFGEF1;ARFGEF2;ASAP2
721	adp-ribosylation factor	ceRNA	CREBRF	28	12	4	0.175772	0.412818	9.26371	1.9745e-20	2.2541e-13	ARFGEF1;ARFGEF2;ARHGAP5;ASAP2
722	adp-ribosylation factor	ceRNA	ELK3	28	12	3	0.175772	0.412818	6.84134	7.84558e-12	8.95654e-05	ARAP2;ASAP1;GBF1
723	adp-ribosylation factor	ceRNA	FAM179B	28	12	3	0.175772	0.412818	6.84134	7.84558e-12	8.95654e-05	ARFGEF2;ARHGAP5;ASAP1
724	adp-ribosylation factor	ceRNA	FNDC3B	28	12	3	0.175772	0.412818	6.84134	7.84558e-12	8.95654e-05	ARAP2;ARHGAP5;ASAP1
725	adp-ribosylation factor	ceRNA	FOXJ3	28	12	3	0.175772	0.412818	6.84134	7.84558e-12	8.95654e-05	ARFGEF1;ASAP2;GBF1
726	adp-ribosylation factor	ceRNA	GIT2	28	12	3	0.175772	0.412818	6.84134	7.84558e-12	8.95654e-05	ARAP2;ARFGEF2;GBF1
727	adp-ribosylation factor	ceRNA	IREB2	28	12	3	0.175772	0.412818	6.84134	7.84558e-12	8.95654e-05	ARFGEF2;ARHGAP5;ASAP2
728	adp-ribosylation factor	ceRNA	KDM2B	28	12	3	0.175772	0.412818	6.84134	7.84558e-12	8.95654e-05	ARFGEF1;ASAP1;RALBP1
729	adp-ribosylation factor	ceRNA	KDM6A	28	12	3	0.175772	0.412818	6.84134	7.84558e-12	8.95654e-05	ARFGEF1;ARHGAP5;ASAP2
730	adp-ribosylation factor	ceRNA	KIF5B	28	12	3	0.175772	0.412818	6.84134	7.84558e-12	8.95654e-05	ARFGEF1;ASAP1;ASAP2
731	adp-ribosylation factor	ceRNA	LCOR	28	12	5	0.175772	0.412818	11.6861	1.50123e-31	1.71381e-24	ARFGEF1;ARFGEF2;ARHGAP5;ASAP1;ASAP2
732	adp-ribosylation factor	ceRNA	LCORL	28	12	4	0.175772	0.412818	9.26371	1.9745e-20	2.2541e-13	ARFGEF1;ARHGAP5;ASAP1;RALBP1
733	adp-ribosylation factor	ceRNA	MED13L	28	12	3	0.175772	0.412818	6.84134	7.84558e-12	8.95654e-05	ARFGEF1;ARHGAP5;ASAP1
734	adp-ribosylation factor	ceRNA	MIER3	28	12	5	0.175772	0.412818	11.6861	1.50123e-31	1.71381e-24	ARFGEF1;ARFGEF2;ASAP1;ASAP2;RALBP1
735	adp-ribosylation factor	ceRNA	MYBL1	28	12	3	0.175772	0.412818	6.84134	7.84558e-12	8.95654e-05	ARFGEF1;ASAP1;RALBP1
736	adp-ribosylation factor	ceRNA	NAA15	28	12	4	0.175772	0.412818	9.26371	1.9745e-20	2.2541e-13	ARFGEF1;ARHGAP5;ASAP1;RALBP1
737	adp-ribosylation factor	ceRNA	NCOA3	28	12	3	0.175772	0.412818	6.84134	7.84558e-12	8.95654e-05	ARFGEF1;ASAP1;ASAP2
738	adp-ribosylation factor	ceRNA	NPAT	28	12	3	0.175772	0.412818	6.84134	7.84558e-12	8.95654e-05	ARAP2;ARFGEF1;ASAP1
739	adp-ribosylation factor	ceRNA	NR3C1	28	12	3	0.175772	0.412818	6.84134	7.84558e-12	8.95654e-05	ARFGEF2;ARHGAP5;ASAP1
740	adp-ribosylation factor	ceRNA	NUFIP2	28	12	4	0.175772	0.412818	9.26371	1.9745e-20	2.2541e-13	ARFGEF1;ARFGEF2;ARHGAP5;ASAP1
741	adp-ribosylation factor	ceRNA	OTUD4	28	12	4	0.175772	0.412818	9.26371	1.9745e-20	2.2541e-13	ARAP2;ARFGEF2;ASAP1;ASAP2
742	adp-ribosylation factor	ceRNA	PDS5A	28	12	3	0.175772	0.412818	6.84134	7.84558e-12	8.95654e-05	ARFGEF1;ARHGAP5;GBF1
743	adp-ribosylation factor	ceRNA	PTEN	28	12	3	0.175772	0.412818	6.84134	7.84558e-12	8.95654e-05	ARAP2;ASAP1;ASAP2
744	adp-ribosylation factor	ceRNA	RASA1	28	12	3	0.175772	0.412818	6.84134	7.84558e-12	8.95654e-05	ARFGEF1;ARHGAP5;ASAP1
745	adp-ribosylation factor	ceRNA	RNF38	28	12	4	0.175772	0.412818	9.26371	1.9745e-20	2.2541e-13	ARFGEF1;ARHGAP5;ASAP1;ASAP2
746	adp-ribosylation factor	ceRNA	ROCK2	28	12	3	0.175772	0.412818	6.84134	7.84558e-12	8.95654e-05	ASAP1;ASAP2;RALBP1
747	adp-ribosylation factor	ceRNA	SBNO1	28	12	4	0.175772	0.412818	9.26371	1.9745e-20	2.2541e-13	ARFGEF1;ARFGEF2;ARHGAP5;ASAP1
748	adp-ribosylation factor	ceRNA	SYNCRIP	28	12	3	0.175772	0.412818	6.84134	7.84558e-12	8.95654e-05	ARFGEF2;ARHGAP5;RALBP1
749	adp-ribosylation factor	ceRNA	SYNJ1	28	12	3	0.175772	0.412818	6.84134	7.84558e-12	8.95654e-05	ARFGEF1;ASAP1;ASAP2
750	adp-ribosylation factor	ceRNA	TCF4	28	12	4	0.175772	0.412818	9.26371	1.9745e-20	2.2541e-13	ARFGEF2;ARHGAP5;ASAP1;CHN1
751	adp-ribosylation factor	ceRNA	TET3	28	12	3	0.175772	0.412818	6.84134	7.84558e-12	8.95654e-05	ARHGAP5;ASAP1;ASAP2
752	adp-ribosylation factor	ceRNA	TRAPPC8	28	12	3	0.175772	0.412818	6.84134	7.84558e-12	8.95654e-05	ARFGEF1;ARFGEF2;ARHGAP5
753	adp-ribosylation factor	ceRNA	YTHDF3	28	12	3	0.175772	0.412818	6.84134	7.84558e-12	8.95654e-05	ARFGEF2;ARHGAP5;ASAP1
754	agrin in postsynaptic differentiation	ceRNA	AFF1	47	22	4	0.363209	0.592471	6.13835	8.3383e-10	0.00951903	ARHGEF7;GIT2;MAPK1;SP1
755	agrin in postsynaptic differentiation	ceRNA	AFF4	47	22	4	0.363209	0.592471	6.13835	8.3383e-10	0.00951903	CDC42;GIT2;ITGB1;LAMC1
756	agrin in postsynaptic differentiation	ceRNA	ANKIB1	47	22	4	0.363209	0.592471	6.13835	8.3383e-10	0.00951903	CDC42;GIT2;MAPK1;PAK2
757	agrin in postsynaptic differentiation	ceRNA	ANKRD13C	47	22	4	0.363209	0.592471	6.13835	8.3383e-10	0.00951903	ARHGEF7;GIT2;MAPK1;SP1
758	agrin in postsynaptic differentiation	ceRNA	ANKRD44	47	22	4	0.363209	0.592471	6.13835	8.3383e-10	0.00951903	CDC42;GIT2;MAPK1;SP1
759	agrin in postsynaptic differentiation	ceRNA	ARID4B	47	22	6	0.363209	0.592471	9.51404	1.83398e-21	2.09368e-14	ARHGEF7;GIT2;ITGB1;MAPK1;PAK2;SP1
760	agrin in postsynaptic differentiation	ceRNA	ARID5B	47	22	5	0.363209	0.592471	7.82619	5.02877e-15	5.74086e-08	ARHGEF7;GIT2;MAPK1;PAK7;SP1
761	agrin in postsynaptic differentiation	ceRNA	ATP2B1	47	22	4	0.363209	0.592471	6.13835	8.3383e-10	0.00951903	CDC42;ITGB1;MAPK1;SP1
762	agrin in postsynaptic differentiation	ceRNA	ATRX	47	22	4	0.363209	0.592471	6.13835	8.3383e-10	0.00951903	CDC42;MAPK1;SP1;UTRN
763	agrin in postsynaptic differentiation	ceRNA	ATXN1L	47	22	4	0.363209	0.592471	6.13835	8.3383e-10	0.00951903	CDC42;GIT2;LAMC1;MAPK1
764	agrin in postsynaptic differentiation	ceRNA	BACH2	47	22	6	0.363209	0.592471	9.51404	1.83398e-21	2.09368e-14	ARHGEF7;CDC42;DMD;MAPK1;PAK7;RAC1
765	agrin in postsynaptic differentiation	ceRNA	BCL11A	47	22	5	0.363209	0.592471	7.82619	5.02877e-15	5.74086e-08	ARHGEF7;CDC42;DMD;NRG2;PAK7
766	agrin in postsynaptic differentiation	ceRNA	BMPR2	47	22	4	0.363209	0.592471	6.13835	8.3383e-10	0.00951903	ARHGEF7;GIT2;MAPK1;SP1
767	agrin in postsynaptic differentiation	ceRNA	C7orf60	47	22	4	0.363209	0.592471	6.13835	8.3383e-10	0.00951903	DMD;GIT2;PAK2;SP1
768	agrin in postsynaptic differentiation	ceRNA	CAND1	47	22	4	0.363209	0.592471	6.13835	8.3383e-10	0.00951903	CDC42;DAG1;SP1;UTRN
769	agrin in postsynaptic differentiation	ceRNA	CDK17	47	22	8	0.363209	0.592471	12.8897	5.14435e-38	5.87281e-31	CDC42;DAG1;DMD;MAPK1;NRG2;NRG3;PAK7;SP1
770	agrin in postsynaptic differentiation	ceRNA	CELF2	47	22	7	0.363209	0.592471	11.2019	3.99081e-29	4.55592e-22	CDC42;DMD;GIT2;LAMC1;NRG2;PAK7;SP1
771	agrin in postsynaptic differentiation	ceRNA	CHD9	47	22	5	0.363209	0.592471	7.82619	5.02877e-15	5.74086e-08	CDC42;GIT2;MAPK1;PAK2;UTRN
772	agrin in postsynaptic differentiation	ceRNA	CPEB3	47	22	8	0.363209	0.592471	12.8897	5.14435e-38	5.87281e-31	ARHGEF7;CDC42;DMD;GIT2;PAK7;PTK2;SP1;UTRN
773	agrin in postsynaptic differentiation	ceRNA	CREB1	47	22	5	0.363209	0.592471	7.82619	5.02877e-15	5.74086e-08	ARHGEF7;GIT2;LAMC1;MAPK1;SP1
774	agrin in postsynaptic differentiation	ceRNA	CREBRF	47	22	7	0.363209	0.592471	11.2019	3.99081e-29	4.55592e-22	ARHGEF7;CDC42;GIT2;ITGB1;MAPK1;PAK7;SP1
775	agrin in postsynaptic differentiation	ceRNA	CTDSPL2	47	22	4	0.363209	0.592471	6.13835	8.3383e-10	0.00951903	CDC42;ITGB1;SP1;UTRN
776	agrin in postsynaptic differentiation	ceRNA	DDX3X	47	22	6	0.363209	0.592471	9.51404	1.83398e-21	2.09368e-14	ARHGEF7;CDC42;GIT2;MAPK1;PAK2;SP1
777	agrin in postsynaptic differentiation	ceRNA	DYRK2	47	22	5	0.363209	0.592471	7.82619	5.02877e-15	5.74086e-08	ARHGEF7;GIT2;LAMC1;MAPK1;SP1
778	agrin in postsynaptic differentiation	ceRNA	EEA1	47	22	4	0.363209	0.592471	6.13835	8.3383e-10	0.00951903	DMD;GIT2;LAMC1;PTK2
779	agrin in postsynaptic differentiation	ceRNA	ELK3	47	22	5	0.363209	0.592471	7.82619	5.02877e-15	5.74086e-08	GIT2;MAPK1;PAK2;SP1;UTRN
780	agrin in postsynaptic differentiation	ceRNA	ERBB2IP	47	22	5	0.363209	0.592471	7.82619	5.02877e-15	5.74086e-08	CDC42;GIT2;ITGB1;MAPK1;SP1
781	agrin in postsynaptic differentiation	ceRNA	FAM126B	47	22	4	0.363209	0.592471	6.13835	8.3383e-10	0.00951903	ARHGEF7;CDC42;GIT2;SP1
782	agrin in postsynaptic differentiation	ceRNA	FAM190B	47	22	4	0.363209	0.592471	6.13835	8.3383e-10	0.00951903	GIT2;ITGB1;MAPK1;SP1
783	agrin in postsynaptic differentiation	ceRNA	FCHO2	47	22	4	0.363209	0.592471	6.13835	8.3383e-10	0.00951903	GIT2;PTK2;SP1;UTRN
784	agrin in postsynaptic differentiation	ceRNA	FERMT2	47	22	5	0.363209	0.592471	7.82619	5.02877e-15	5.74086e-08	GIT2;ITGB1;LAMC1;NRG1;SP1
785	agrin in postsynaptic differentiation	ceRNA	FMR1	47	22	6	0.363209	0.592471	9.51404	1.83398e-21	2.09368e-14	ARHGEF7;GIT2;MAPK1;PAK2;PTK2;SP1
786	agrin in postsynaptic differentiation	ceRNA	FNDC3B	47	22	5	0.363209	0.592471	7.82619	5.02877e-15	5.74086e-08	DMD;GIT2;ITGB1;LAMC1;SP1
787	agrin in postsynaptic differentiation	ceRNA	FOXP2	47	22	4	0.363209	0.592471	6.13835	8.3383e-10	0.00951903	CDC42;DMD;NRG1;UTRN
788	agrin in postsynaptic differentiation	ceRNA	FRS2	47	22	7	0.363209	0.592471	11.2019	3.99081e-29	4.55592e-22	ARHGEF7;CDC42;GIT2;LAMC1;NRG2;PTK2;SP1
789	agrin in postsynaptic differentiation	ceRNA	FSTL1	47	22	4	0.363209	0.592471	6.13835	8.3383e-10	0.00951903	CDC42;GIT2;LAMC1;SP1
790	agrin in postsynaptic differentiation	ceRNA	FUBP3	47	22	4	0.363209	0.592471	6.13835	8.3383e-10	0.00951903	CDC42;DAG1;MAPK1;SP1
791	agrin in postsynaptic differentiation	ceRNA	HIPK3	47	22	5	0.363209	0.592471	7.82619	5.02877e-15	5.74086e-08	GIT2;ITGB1;LAMA3;MAPK1;SP1
792	agrin in postsynaptic differentiation	ceRNA	IKZF2	47	22	4	0.363209	0.592471	6.13835	8.3383e-10	0.00951903	ARHGEF7;DMD;SP1;UTRN
793	agrin in postsynaptic differentiation	ceRNA	JAZF1	47	22	5	0.363209	0.592471	7.82619	5.02877e-15	5.74086e-08	ARHGEF7;DMD;GIT2;ITGB1;LAMC1
794	agrin in postsynaptic differentiation	ceRNA	KDM2A	47	22	4	0.363209	0.592471	6.13835	8.3383e-10	0.00951903	GIT2;MAPK1;PAK2;SP1
795	agrin in postsynaptic differentiation	ceRNA	KIAA0240	47	22	4	0.363209	0.592471	6.13835	8.3383e-10	0.00951903	ARHGEF7;CDC42;PAK2;SP1
796	agrin in postsynaptic differentiation	ceRNA	LCOR	47	22	8	0.363209	0.592471	12.8897	5.14435e-38	5.87281e-31	ARHGEF7;CDC42;DMD;GIT2;MAPK1;PAK2;SP1;UTRN
797	agrin in postsynaptic differentiation	ceRNA	LCORL	47	22	4	0.363209	0.592471	6.13835	8.3383e-10	0.00951903	CDC42;DAG1;MAPK1;SP1
798	agrin in postsynaptic differentiation	ceRNA	MEX3B	47	22	5	0.363209	0.592471	7.82619	5.02877e-15	5.74086e-08	CDC42;DMD;ITGB1;NRG2;PAK7
799	agrin in postsynaptic differentiation	ceRNA	MIER3	47	22	7	0.363209	0.592471	11.2019	3.99081e-29	4.55592e-22	ARHGEF7;DAG1;GIT2;MAPK1;PAK2;PTK2;SP1
800	agrin in postsynaptic differentiation	ceRNA	MITF	47	22	4	0.363209	0.592471	6.13835	8.3383e-10	0.00951903	ITGB1;LAMC1;MAPK1;RAC1
801	agrin in postsynaptic differentiation	ceRNA	MTF1	47	22	4	0.363209	0.592471	6.13835	8.3383e-10	0.00951903	GIT2;MAPK1;PAK2;SP1
802	agrin in postsynaptic differentiation	ceRNA	NAV3	47	22	6	0.363209	0.592471	9.51404	1.83398e-21	2.09368e-14	CDC42;DMD;GIT2;NRG1;NRG3;SP1
803	agrin in postsynaptic differentiation	ceRNA	NOVA1	47	22	5	0.363209	0.592471	7.82619	5.02877e-15	5.74086e-08	CDC42;DMD;NRG2;PAK7;UTRN
804	agrin in postsynaptic differentiation	ceRNA	NUFIP2	47	22	6	0.363209	0.592471	9.51404	1.83398e-21	2.09368e-14	CDC42;DAG1;GIT2;ITGB1;MAPK1;SP1
805	agrin in postsynaptic differentiation	ceRNA	OTUD4	47	22	7	0.363209	0.592471	11.2019	3.99081e-29	4.55592e-22	CDC42;GIT2;LAMC1;MAPK1;PAK2;SP1;UTRN
806	agrin in postsynaptic differentiation	ceRNA	PAFAH1B1	47	22	4	0.363209	0.592471	6.13835	8.3383e-10	0.00951903	ARHGEF7;CDC42;LAMC1;MAPK1
807	agrin in postsynaptic differentiation	ceRNA	PALLD	47	22	4	0.363209	0.592471	6.13835	8.3383e-10	0.00951903	DMD;GIT2;ITGB1;LAMC1
808	agrin in postsynaptic differentiation	ceRNA	PDGFRA	47	22	4	0.363209	0.592471	6.13835	8.3383e-10	0.00951903	ARHGEF7;GIT2;LAMC1;MAPK1
809	agrin in postsynaptic differentiation	ceRNA	PIK3C2A	47	22	4	0.363209	0.592471	6.13835	8.3383e-10	0.00951903	CDC42;GIT2;MAPK1;SP1
810	agrin in postsynaptic differentiation	ceRNA	PPM1B	47	22	4	0.363209	0.592471	6.13835	8.3383e-10	0.00951903	CDC42;DAG1;ITGB1;SP1
811	agrin in postsynaptic differentiation	ceRNA	PTEN	47	22	4	0.363209	0.592471	6.13835	8.3383e-10	0.00951903	CDC42;DMD;GIT2;MAPK1
812	agrin in postsynaptic differentiation	ceRNA	QKI	47	22	5	0.363209	0.592471	7.82619	5.02877e-15	5.74086e-08	CDC42;MAPK1;NRG1;PAK7;SP1
813	agrin in postsynaptic differentiation	ceRNA	RB1CC1	47	22	4	0.363209	0.592471	6.13835	8.3383e-10	0.00951903	ARHGEF7;MAPK1;PAK7;PTK2
814	agrin in postsynaptic differentiation	ceRNA	RBM27	47	22	4	0.363209	0.592471	6.13835	8.3383e-10	0.00951903	ARHGEF7;CDC42;ITGB1;PTK2
815	agrin in postsynaptic differentiation	ceRNA	RFX7	47	22	4	0.363209	0.592471	6.13835	8.3383e-10	0.00951903	CDC42;GIT2;PAK2;SP1
816	agrin in postsynaptic differentiation	ceRNA	RLIM	47	22	4	0.363209	0.592471	6.13835	8.3383e-10	0.00951903	CDC42;DAG1;MAPK1;SP1
817	agrin in postsynaptic differentiation	ceRNA	ROCK2	47	22	6	0.363209	0.592471	9.51404	1.83398e-21	2.09368e-14	ARHGEF7;GIT2;ITGB1;MAPK1;SP1;UTRN
818	agrin in postsynaptic differentiation	ceRNA	RSBN1	47	22	4	0.363209	0.592471	6.13835	8.3383e-10	0.00951903	ARHGEF7;CDC42;MAPK1;SP1
819	agrin in postsynaptic differentiation	ceRNA	RYBP	47	22	4	0.363209	0.592471	6.13835	8.3383e-10	0.00951903	CDC42;DAG1;ITGB1;SP1
820	agrin in postsynaptic differentiation	ceRNA	SBNO1	47	22	4	0.363209	0.592471	6.13835	8.3383e-10	0.00951903	DAG1;GIT2;SP1;UTRN
821	agrin in postsynaptic differentiation	ceRNA	SNX13	47	22	5	0.363209	0.592471	7.82619	5.02877e-15	5.74086e-08	ARHGEF7;CDC42;GIT2;MAPK1;SP1
822	agrin in postsynaptic differentiation	ceRNA	SP1	47	22	4	0.363209	0.592471	6.13835	8.3383e-10	0.00951903	ARHGEF7;DAG1;GIT2;PTK2
823	agrin in postsynaptic differentiation	ceRNA	SRPK2	47	22	4	0.363209	0.592471	6.13835	8.3383e-10	0.00951903	CDC42;GIT2;PTK2;SP1
824	agrin in postsynaptic differentiation	ceRNA	SYNCRIP	47	22	5	0.363209	0.592471	7.82619	5.02877e-15	5.74086e-08	ITGB1;LAMC1;MAPK1;SP1;UTRN
825	agrin in postsynaptic differentiation	ceRNA	TCF4	47	22	8	0.363209	0.592471	12.8897	5.14435e-38	5.87281e-31	CDC42;DMD;GIT2;ITGB1;MAPK1;PAK7;PTK2;SP1
826	agrin in postsynaptic differentiation	ceRNA	TEAD1	47	22	4	0.363209	0.592471	6.13835	8.3383e-10	0.00951903	ARHGEF7;CDC42;GIT2;SP1
827	agrin in postsynaptic differentiation	ceRNA	TNPO1	47	22	4	0.363209	0.592471	6.13835	8.3383e-10	0.00951903	CDC42;DAG1;MAPK1;SP1
828	agrin in postsynaptic differentiation	ceRNA	VEZF1	47	22	4	0.363209	0.592471	6.13835	8.3383e-10	0.00951903	CDC42;ITGB1;PTK2;SP1
829	agrin in postsynaptic differentiation	ceRNA	WDFY3	47	22	5	0.363209	0.592471	7.82619	5.02877e-15	5.74086e-08	ARHGEF7;CDC42;GIT2;MAPK1;SP1
830	agrin in postsynaptic differentiation	ceRNA	YTHDF3	47	22	8	0.363209	0.592471	12.8897	5.14435e-38	5.87281e-31	CDC42;DAG1;GIT2;ITGB1;LAMC1;MAPK1;SP1;UTRN
831	agrin in postsynaptic differentiation	ceRNA	ZBTB4	47	22	4	0.363209	0.592471	6.13835	8.3383e-10	0.00951903	GIT2;LAMC1;MAPK1;PAK7
832	agrin in postsynaptic differentiation	ceRNA	ZCCHC24	47	22	4	0.363209	0.592471	6.13835	8.3383e-10	0.00951903	ARHGEF7;DMD;NRG2;PAK7
833	agrin in postsynaptic differentiation	ceRNA	ZEB2	47	22	5	0.363209	0.592471	7.82619	5.02877e-15	5.74086e-08	CDC42;DMD;MAPK1;PAK2;SP1
834	agrin in postsynaptic differentiation	ceRNA	ZFHX4	47	22	6	0.363209	0.592471	9.51404	1.83398e-21	2.09368e-14	CDC42;DMD;ITGB1;MAPK1;PAK2;PAK7
835	agrin in postsynaptic differentiation	ceRNA	ZFPM2	47	22	6	0.363209	0.592471	9.51404	1.83398e-21	2.09368e-14	ARHGEF7;DMD;GIT2;ITGB1;PAK7;SP1
836	agrin in postsynaptic differentiation	ceRNA	ZNF148	47	22	6	0.363209	0.592471	9.51404	1.83398e-21	2.09368e-14	CDC42;LAMC1;MAPK1;PAK2;PTK2;SP1
837	akap95 role in mitosis and chromosome dynamics	ceRNA	ATL2	14	7	2	0.0687539	0.258479	7.47157	7.92436e-14	9.04647e-07	DDX5;PRKACB
838	akap95 role in mitosis and chromosome dynamics	ceRNA	CDK17	14	7	2	0.0687539	0.258479	7.47157	7.92436e-14	9.04647e-07	DDX5;PRKACB
839	akap95 role in mitosis and chromosome dynamics	ceRNA	CHD9	14	7	2	0.0687539	0.258479	7.47157	7.92436e-14	9.04647e-07	DDX5;PRKACB
840	akap95 role in mitosis and chromosome dynamics	ceRNA	CPEB2	14	7	3	0.0687539	0.258479	11.3404	8.27653e-30	9.44851e-23	DDX5;PRKACB;PRKAR2B
841	akap95 role in mitosis and chromosome dynamics	ceRNA	CPEB4	14	7	2	0.0687539	0.258479	7.47157	7.92436e-14	9.04647e-07	DDX5;PRKACB
842	akap95 role in mitosis and chromosome dynamics	ceRNA	DOCK7	14	7	2	0.0687539	0.258479	7.47157	7.92436e-14	9.04647e-07	DDX5;PRKACB
843	akap95 role in mitosis and chromosome dynamics	ceRNA	FAM91A1	14	7	2	0.0687539	0.258479	7.47157	7.92436e-14	9.04647e-07	DDX5;PRKAR2A
844	akap95 role in mitosis and chromosome dynamics	ceRNA	KLF9	14	7	2	0.0687539	0.258479	7.47157	7.92436e-14	9.04647e-07	DDX5;PRKACB
845	akap95 role in mitosis and chromosome dynamics	ceRNA	LRCH1	14	7	2	0.0687539	0.258479	7.47157	7.92436e-14	9.04647e-07	DDX5;PRKACB
846	akap95 role in mitosis and chromosome dynamics	ceRNA	MBTD1	14	7	2	0.0687539	0.258479	7.47157	7.92436e-14	9.04647e-07	DDX5;H3F3B
847	akap95 role in mitosis and chromosome dynamics	ceRNA	MIER3	14	7	2	0.0687539	0.258479	7.47157	7.92436e-14	9.04647e-07	DDX5;PRKAR2B
848	akap95 role in mitosis and chromosome dynamics	ceRNA	PJA2	14	7	2	0.0687539	0.258479	7.47157	7.92436e-14	9.04647e-07	DDX5;PRKACB
849	akap95 role in mitosis and chromosome dynamics	ceRNA	PTEN	14	7	2	0.0687539	0.258479	7.47157	7.92436e-14	9.04647e-07	DDX5;PRKACB
850	akap95 role in mitosis and chromosome dynamics	ceRNA	RAP1B	14	7	2	0.0687539	0.258479	7.47157	7.92436e-14	9.04647e-07	DDX5;PRKACB
851	akap95 role in mitosis and chromosome dynamics	ceRNA	WNK3	14	7	2	0.0687539	0.258479	7.47157	7.92436e-14	9.04647e-07	DDX5;PRKACB
852	akap95 role in mitosis and chromosome dynamics	ceRNA	ZEB2	14	7	2	0.0687539	0.258479	7.47157	7.92436e-14	9.04647e-07	DDX5;PRKACB
853	akt signaling pathway	ceRNA	ARHGAP20	18	10	3	0.122366	0.34507	8.33927	7.47506e-17	8.53355e-10	FOXO1;GHR;PIK3R1
854	akt signaling pathway	ceRNA	ARID5B	18	10	3	0.122366	0.34507	8.33927	7.47506e-17	8.53355e-10	FOXO1;PIK3CA;PIK3R1
855	akt signaling pathway	ceRNA	ATXN7	18	10	4	0.122366	0.34507	11.2372	2.6774e-29	3.05653e-22	CHUK;FOXO1;PDPK1;PPP2CA
856	akt signaling pathway	ceRNA	BNC2	18	10	3	0.122366	0.34507	8.33927	7.47506e-17	8.53355e-10	FOXO1;PIK3CA;PIK3R1
857	akt signaling pathway	ceRNA	CDK17	18	10	3	0.122366	0.34507	8.33927	7.47506e-17	8.53355e-10	CHUK;FOXO1;GHR
858	akt signaling pathway	ceRNA	CELF2	18	10	3	0.122366	0.34507	8.33927	7.47506e-17	8.53355e-10	FOXO1;FOXO3;PIK3R1
859	akt signaling pathway	ceRNA	CREBRF	18	10	3	0.122366	0.34507	8.33927	7.47506e-17	8.53355e-10	FOXO1;GHR;PIK3R1
860	akt signaling pathway	ceRNA	DDX3X	18	10	3	0.122366	0.34507	8.33927	7.47506e-17	8.53355e-10	FOXO1;PIK3CA;PPP2CA
861	akt signaling pathway	ceRNA	KIAA0240	18	10	3	0.122366	0.34507	8.33927	7.47506e-17	8.53355e-10	FOXO1;FOXO3;PIK3CA
862	akt signaling pathway	ceRNA	NFIB	18	10	3	0.122366	0.34507	8.33927	7.47506e-17	8.53355e-10	FOXO1;PIK3CA;PIK3R1
863	akt signaling pathway	ceRNA	PPM1B	18	10	3	0.122366	0.34507	8.33927	7.47506e-17	8.53355e-10	CHUK;FOXO1;PDPK1
864	akt signaling pathway	ceRNA	SEMA6D	18	10	3	0.122366	0.34507	8.33927	7.47506e-17	8.53355e-10	FOXO1;GHR;PPP2CA
865	akt signaling pathway	ceRNA	ZFX	18	10	3	0.122366	0.34507	8.33927	7.47506e-17	8.53355e-10	CHUK;FOXO1;PPP2CA
866	alk in cardiac myocytes	ceRNA	ANKIB1	27	18	4	0.347452	0.578285	6.31617	2.68125e-10	0.00306092	ATF2;BMPR2;SMAD1;SMAD5
867	alk in cardiac myocytes	ceRNA	ANKRD50	27	18	5	0.347452	0.578285	8.04542	8.59501e-16	9.81209e-09	BMPR2;MAP3K7;SMAD1;SMAD4;SMAD5
868	alk in cardiac myocytes	ceRNA	ARID2	27	18	4	0.347452	0.578285	6.31617	2.68125e-10	0.00306092	ATF2;BMPR2;SMAD1;SMAD5
869	alk in cardiac myocytes	ceRNA	ARID4A	27	18	5	0.347452	0.578285	8.04542	8.59501e-16	9.81209e-09	ATF2;MAP3K7;MEF2C;SMAD1;SMAD4
870	alk in cardiac myocytes	ceRNA	ARID4B	27	18	4	0.347452	0.578285	6.31617	2.68125e-10	0.00306092	BMPR2;MAP3K7;SMAD1;SMAD5
871	alk in cardiac myocytes	ceRNA	ATXN1	27	18	6	0.347452	0.578285	9.77467	1.44628e-22	1.65108e-15	BMPR2;MAP3K7;MEF2C;SMAD1;SMAD4;TGFBR2
872	alk in cardiac myocytes	ceRNA	BBX	27	18	4	0.347452	0.578285	6.31617	2.68125e-10	0.00306092	BMPR2;SMAD1;SMAD4;SMAD5
873	alk in cardiac myocytes	ceRNA	BCL2L11	27	18	4	0.347452	0.578285	6.31617	2.68125e-10	0.00306092	BMPR2;SMAD1;SMAD4;SMAD5
874	alk in cardiac myocytes	ceRNA	BICD2	27	18	4	0.347452	0.578285	6.31617	2.68125e-10	0.00306092	MAP3K7;SMAD1;TGFB2;TGFBR2
875	alk in cardiac myocytes	ceRNA	BNC2	27	18	4	0.347452	0.578285	6.31617	2.68125e-10	0.00306092	MAP3K7;MEF2C;SMAD1;TGFBR2
876	alk in cardiac myocytes	ceRNA	BTBD7	27	18	4	0.347452	0.578285	6.31617	2.68125e-10	0.00306092	MAP3K7;SMAD1;SMAD4;SMAD5
877	alk in cardiac myocytes	ceRNA	CAB39	27	18	4	0.347452	0.578285	6.31617	2.68125e-10	0.00306092	MAP3K7;SMAD1;SMAD4;SMAD5
878	alk in cardiac myocytes	ceRNA	CDK17	27	18	5	0.347452	0.578285	8.04542	8.59501e-16	9.81209e-09	ATF2;MEF2C;SMAD1;SMAD4;SMAD5
879	alk in cardiac myocytes	ceRNA	CELF2	27	18	5	0.347452	0.578285	8.04542	8.59501e-16	9.81209e-09	ATF2;BMPR2;MAP3K7;TGFB2;TGFBR1
880	alk in cardiac myocytes	ceRNA	CHD9	27	18	5	0.347452	0.578285	8.04542	8.59501e-16	9.81209e-09	ATF2;MAP3K7;MEF2C;SMAD1;SMAD5
881	alk in cardiac myocytes	ceRNA	CLIP4	27	18	4	0.347452	0.578285	6.31617	2.68125e-10	0.00306092	BMP2;BMPR2;MEF2C;TGFBR2
882	alk in cardiac myocytes	ceRNA	CPEB3	27	18	7	0.347452	0.578285	11.5039	1.26087e-30	1.43941e-23	ATF2;MEF2C;SMAD1;SMAD4;SMAD5;TGFBR1;TGFBR2
883	alk in cardiac myocytes	ceRNA	CREB1	27	18	5	0.347452	0.578285	8.04542	8.59501e-16	9.81209e-09	BMPR2;SMAD1;SMAD4;SMAD5;TGFBR1
884	alk in cardiac myocytes	ceRNA	CREBRF	27	18	10	0.347452	0.578285	16.6917	1.5062e-62	1.71948e-55	ATF2;BMP2;BMPR2;MAP3K7;MEF2C;SMAD1;SMAD4;SMAD5;TGFB2;TGFBR2
885	alk in cardiac myocytes	ceRNA	CTDSPL2	27	18	4	0.347452	0.578285	6.31617	2.68125e-10	0.00306092	MEF2C;SMAD1;SMAD4;SMAD5
886	alk in cardiac myocytes	ceRNA	DDX3X	27	18	5	0.347452	0.578285	8.04542	8.59501e-16	9.81209e-09	ATF2;BMPR1A;SMAD1;SMAD5;TGFBR1
887	alk in cardiac myocytes	ceRNA	DYNC1LI2	27	18	5	0.347452	0.578285	8.04542	8.59501e-16	9.81209e-09	BMPR2;MAP3K7;SMAD1;SMAD4;TGFBR2
888	alk in cardiac myocytes	ceRNA	DYRK2	27	18	5	0.347452	0.578285	8.04542	8.59501e-16	9.81209e-09	BMPR2;MAP3K7;SMAD5;TGFBR1;TGFBR2
889	alk in cardiac myocytes	ceRNA	ELK3	27	18	7	0.347452	0.578285	11.5039	1.26087e-30	1.43941e-23	BMPR2;MEF2C;SMAD1;SMAD4;SMAD5;TGFB2;TGFBR2
890	alk in cardiac myocytes	ceRNA	FCHO2	27	18	4	0.347452	0.578285	6.31617	2.68125e-10	0.00306092	MAP3K7;MEF2C;SMAD4;TGFBR2
891	alk in cardiac myocytes	ceRNA	FNDC3B	27	18	6	0.347452	0.578285	9.77467	1.44628e-22	1.65108e-15	MAP3K7;MEF2C;SMAD1;SMAD4;TGFB2;TGFBR1
892	alk in cardiac myocytes	ceRNA	FOXJ3	27	18	5	0.347452	0.578285	8.04542	8.59501e-16	9.81209e-09	ATF2;MAP3K7;SMAD1;SMAD4;SMAD5
893	alk in cardiac myocytes	ceRNA	FOXP1	27	18	4	0.347452	0.578285	6.31617	2.68125e-10	0.00306092	MAP3K7;MEF2C;SMAD4;TGFBR1
894	alk in cardiac myocytes	ceRNA	HIAT1	27	18	4	0.347452	0.578285	6.31617	2.68125e-10	0.00306092	ATF2;BMPR2;SMAD1;SMAD5
895	alk in cardiac myocytes	ceRNA	KLF6	27	18	4	0.347452	0.578285	6.31617	2.68125e-10	0.00306092	BMPR2;MEF2C;SMAD4;TGFBR1
896	alk in cardiac myocytes	ceRNA	KLHL15	27	18	4	0.347452	0.578285	6.31617	2.68125e-10	0.00306092	BMPR2;MAP3K7;MEF2C;SMAD5
897	alk in cardiac myocytes	ceRNA	KPNA3	27	18	7	0.347452	0.578285	11.5039	1.26087e-30	1.43941e-23	BMPR2;MAP3K7;MEF2C;SMAD1;SMAD4;SMAD5;TGFBR2
898	alk in cardiac myocytes	ceRNA	LARP4B	27	18	4	0.347452	0.578285	6.31617	2.68125e-10	0.00306092	ATF2;MAP3K7;SMAD4;SMAD5
899	alk in cardiac myocytes	ceRNA	LCOR	27	18	6	0.347452	0.578285	9.77467	1.44628e-22	1.65108e-15	BMPR2;MEF2C;SMAD1;SMAD4;SMAD5;TGFBR2
900	alk in cardiac myocytes	ceRNA	LCORL	27	18	6	0.347452	0.578285	9.77467	1.44628e-22	1.65108e-15	ATF2;BMPR2;MEF2C;SMAD1;SMAD4;SMAD5
901	alk in cardiac myocytes	ceRNA	LRCH1	27	18	5	0.347452	0.578285	8.04542	8.59501e-16	9.81209e-09	BMPR2;MEF2C;SMAD4;TGFB2;TGFBR2
902	alk in cardiac myocytes	ceRNA	LRP12	27	18	4	0.347452	0.578285	6.31617	2.68125e-10	0.00306092	BMPR2;MEF2C;SMAD1;TGFBR2
903	alk in cardiac myocytes	ceRNA	MAP3K1	27	18	4	0.347452	0.578285	6.31617	2.68125e-10	0.00306092	MAP3K7;SMAD1;SMAD4;TGFB2
904	alk in cardiac myocytes	ceRNA	MED13	27	18	4	0.347452	0.578285	6.31617	2.68125e-10	0.00306092	ATF2;BMPR2;MEF2C;SMAD4
905	alk in cardiac myocytes	ceRNA	MEX3B	27	18	4	0.347452	0.578285	6.31617	2.68125e-10	0.00306092	ATF2;SMAD1;TGFB2;TGFBR1
906	alk in cardiac myocytes	ceRNA	MLL3	27	18	4	0.347452	0.578285	6.31617	2.68125e-10	0.00306092	BMPR2;MAP3K7;SMAD1;SMAD5
907	alk in cardiac myocytes	ceRNA	MTF1	27	18	5	0.347452	0.578285	8.04542	8.59501e-16	9.81209e-09	BMPR2;MAP3K7;SMAD1;SMAD5;TGFBR2
908	alk in cardiac myocytes	ceRNA	NFIB	27	18	4	0.347452	0.578285	6.31617	2.68125e-10	0.00306092	BMPR2;MEF2C;SMAD6;TGFBR2
909	alk in cardiac myocytes	ceRNA	NPAT	27	18	6	0.347452	0.578285	9.77467	1.44628e-22	1.65108e-15	ATF2;BMPR2;MAP3K7;SMAD1;SMAD4;SMAD5
910	alk in cardiac myocytes	ceRNA	NUFIP2	27	18	4	0.347452	0.578285	6.31617	2.68125e-10	0.00306092	BMPR2;MAP3K7;SMAD1;SMAD5
911	alk in cardiac myocytes	ceRNA	OTUD4	27	18	4	0.347452	0.578285	6.31617	2.68125e-10	0.00306092	MAP3K7;SMAD1;SMAD4;SMAD5
912	alk in cardiac myocytes	ceRNA	PTEN	27	18	5	0.347452	0.578285	8.04542	8.59501e-16	9.81209e-09	ATF2;MAP3K7;SMAD5;TGFB2;TGFBR2
913	alk in cardiac myocytes	ceRNA	PURB	27	18	4	0.347452	0.578285	6.31617	2.68125e-10	0.00306092	MAP3K7;SMAD1;SMAD4;SMAD5
914	alk in cardiac myocytes	ceRNA	QKI	27	18	4	0.347452	0.578285	6.31617	2.68125e-10	0.00306092	BMPR2;SMAD4;SMAD5;TGFB2
915	alk in cardiac myocytes	ceRNA	RCOR1	27	18	5	0.347452	0.578285	8.04542	8.59501e-16	9.81209e-09	BMPR2;MAP3K7;SMAD1;SMAD4;SMAD5
916	alk in cardiac myocytes	ceRNA	RLIM	27	18	4	0.347452	0.578285	6.31617	2.68125e-10	0.00306092	BMPR2;MAP3K7;SMAD4;SMAD5
917	alk in cardiac myocytes	ceRNA	RNF111	27	18	4	0.347452	0.578285	6.31617	2.68125e-10	0.00306092	ATF2;SMAD1;SMAD4;SMAD5
918	alk in cardiac myocytes	ceRNA	RNF38	27	18	6	0.347452	0.578285	9.77467	1.44628e-22	1.65108e-15	ATF2;BMPR2;MAP3K7;MEF2C;SMAD5;TGFBR2
919	alk in cardiac myocytes	ceRNA	ROCK2	27	18	4	0.347452	0.578285	6.31617	2.68125e-10	0.00306092	BMPR2;MAP3K7;SMAD4;TGFBR2
920	alk in cardiac myocytes	ceRNA	RORA	27	18	5	0.347452	0.578285	8.04542	8.59501e-16	9.81209e-09	BMPR2;MAP3K7;SMAD1;SMAD4;TGFBR2
921	alk in cardiac myocytes	ceRNA	RSBN1	27	18	5	0.347452	0.578285	8.04542	8.59501e-16	9.81209e-09	BMPR2;MAP3K7;SMAD1;SMAD5;TGFBR2
922	alk in cardiac myocytes	ceRNA	RUNX2	27	18	5	0.347452	0.578285	8.04542	8.59501e-16	9.81209e-09	MAP3K7;MEF2C;SMAD5;TGFB2;TGFBR2
923	alk in cardiac myocytes	ceRNA	RYBP	27	18	4	0.347452	0.578285	6.31617	2.68125e-10	0.00306092	ATF2;BMPR2;MEF2C;SMAD1
924	alk in cardiac myocytes	ceRNA	SAMD8	27	18	4	0.347452	0.578285	6.31617	2.68125e-10	0.00306092	MAP3K7;SMAD1;SMAD4;SMAD5
925	alk in cardiac myocytes	ceRNA	SKI	27	18	4	0.347452	0.578285	6.31617	2.68125e-10	0.00306092	BMPR2;MEF2C;SMAD4;TGFBR2
926	alk in cardiac myocytes	ceRNA	SOCS5	27	18	4	0.347452	0.578285	6.31617	2.68125e-10	0.00306092	MAP3K7;MEF2C;SMAD1;SMAD5
927	alk in cardiac myocytes	ceRNA	SP4	27	18	5	0.347452	0.578285	8.04542	8.59501e-16	9.81209e-09	BMPR2;MEF2C;SMAD1;SMAD4;TGFBR1
928	alk in cardiac myocytes	ceRNA	SPRED1	27	18	6	0.347452	0.578285	9.77467	1.44628e-22	1.65108e-15	ATF2;BMPR2;MAP3K7;MEF2C;SMAD4;TGFBR2
929	alk in cardiac myocytes	ceRNA	SRPK2	27	18	4	0.347452	0.578285	6.31617	2.68125e-10	0.00306092	ATF2;BMPR2;SMAD1;SMAD5
930	alk in cardiac myocytes	ceRNA	SYNCRIP	27	18	6	0.347452	0.578285	9.77467	1.44628e-22	1.65108e-15	ATF2;MEF2C;SMAD1;SMAD4;SMAD5;TGFBR1
931	alk in cardiac myocytes	ceRNA	TCF4	27	18	8	0.347452	0.578285	13.2332	5.64326e-40	6.44236e-33	ATF2;BMPR2;MEF2C;SMAD1;SMAD6;TGFB2;TGFBR1;TGFBR2
932	alk in cardiac myocytes	ceRNA	TET2	27	18	4	0.347452	0.578285	6.31617	2.68125e-10	0.00306092	MAP3K7;MEF2C;SMAD1;TGFBR2
933	alk in cardiac myocytes	ceRNA	TET3	27	18	4	0.347452	0.578285	6.31617	2.68125e-10	0.00306092	BMPR2;MAP3K7;SMAD4;SMAD5
934	alk in cardiac myocytes	ceRNA	TNPO1	27	18	5	0.347452	0.578285	8.04542	8.59501e-16	9.81209e-09	ATF2;BMPR1A;BMPR2;SMAD1;SMAD5
935	alk in cardiac myocytes	ceRNA	TSHZ2	27	18	5	0.347452	0.578285	8.04542	8.59501e-16	9.81209e-09	BMPR2;MEF2C;SMAD1;SMAD5;TGFBR1
936	alk in cardiac myocytes	ceRNA	UBE2W	27	18	4	0.347452	0.578285	6.31617	2.68125e-10	0.00306092	BMPR2;SMAD1;SMAD4;SMAD5
937	alk in cardiac myocytes	ceRNA	YTHDF3	27	18	7	0.347452	0.578285	11.5039	1.26087e-30	1.43941e-23	ATF2;BMPR2;MEF2C;SMAD1;SMAD4;TGFBR1;TGFBR2
938	alk in cardiac myocytes	ceRNA	ZFHX4	27	18	5	0.347452	0.578285	8.04542	8.59501e-16	9.81209e-09	ATF2;MEF2C;SMAD1;TGFBR1;TGFBR2
939	alk in cardiac myocytes	ceRNA	ZFPM2	27	18	7	0.347452	0.578285	11.5039	1.26087e-30	1.43941e-23	BMP2;BMPR2;MAP3K7;SMAD5;TGFB2;TGFBR1;TGFBR2
940	alk in cardiac myocytes	ceRNA	ZNF148	27	18	5	0.347452	0.578285	8.04542	8.59501e-16	9.81209e-09	BMPR2;MAP3K7;SMAD1;SMAD4;SMAD5
941	angiotensin ii mediated activation of jnk pathway via pyk2 dependent signaling	ceRNA	ACVR2B	34	19	5	0.437896	0.639072	7.13863	9.42657e-13	1.07614e-05	ATF2;MAP3K1;MEF2A;MEF2D;RAF1
942	angiotensin ii mediated activation of jnk pathway via pyk2 dependent signaling	ceRNA	AFF4	34	19	5	0.437896	0.639072	7.13863	9.42657e-13	1.07614e-05	MAP2K1;MAP2K4;MAP3K1;MEF2D;SOS1
943	angiotensin ii mediated activation of jnk pathway via pyk2 dependent signaling	ceRNA	ARID4A	34	19	6	0.437896	0.639072	8.7034	3.22086e-18	3.67694e-11	ATF2;MAP2K4;MAP3K1;MEF2A;MEF2C;SOS1
944	angiotensin ii mediated activation of jnk pathway via pyk2 dependent signaling	ceRNA	BACH2	34	19	6	0.437896	0.639072	8.7034	3.22086e-18	3.67694e-11	MAP2K4;MAP3K1;MAPK1;MEF2A;RAC1;SOS1
945	angiotensin ii mediated activation of jnk pathway via pyk2 dependent signaling	ceRNA	C5orf24	34	19	5	0.437896	0.639072	7.13863	9.42657e-13	1.07614e-05	MAP2K1;MAP3K1;MAPK1;MEF2A;SOS1
946	angiotensin ii mediated activation of jnk pathway via pyk2 dependent signaling	ceRNA	CDK17	34	19	8	0.437896	0.639072	11.8329	2.63865e-32	3.01229e-25	ATF2;MAP2K1;MAP2K4;MAP3K1;MAPK1;MEF2A;MEF2C;SOS1
947	angiotensin ii mediated activation of jnk pathway via pyk2 dependent signaling	ceRNA	CELF2	34	19	6	0.437896	0.639072	8.7034	3.22086e-18	3.67694e-11	ATF2;MAP2K4;MAP3K1;MEF2A;PRKCB;SOS1
948	angiotensin ii mediated activation of jnk pathway via pyk2 dependent signaling	ceRNA	CHD9	34	19	7	0.437896	0.639072	10.2682	9.80163e-25	1.11896e-17	ATF2;MAP3K1;MAPK1;MEF2A;MEF2C;MEF2D;SOS1
949	angiotensin ii mediated activation of jnk pathway via pyk2 dependent signaling	ceRNA	CNOT6L	34	19	6	0.437896	0.639072	8.7034	3.22086e-18	3.67694e-11	MAP2K1;MAP2K4;MAP3K1;MAPK1;MEF2A;SOS1
950	angiotensin ii mediated activation of jnk pathway via pyk2 dependent signaling	ceRNA	CPEB3	34	19	6	0.437896	0.639072	8.7034	3.22086e-18	3.67694e-11	ATF2;MAP3K1;MEF2A;MEF2C;MEF2D;SOS1
951	angiotensin ii mediated activation of jnk pathway via pyk2 dependent signaling	ceRNA	CPEB4	34	19	7	0.437896	0.639072	10.2682	9.80163e-25	1.11896e-17	GRB2;MAP2K4;MAP3K1;MAPK1;MEF2A;MEF2C;SOS1
952	angiotensin ii mediated activation of jnk pathway via pyk2 dependent signaling	ceRNA	CREBRF	34	19	7	0.437896	0.639072	10.2682	9.80163e-25	1.11896e-17	ATF2;MAP3K1;MAPK1;MEF2A;MEF2C;RAF1;SOS1
953	angiotensin ii mediated activation of jnk pathway via pyk2 dependent signaling	ceRNA	CTDSPL2	34	19	5	0.437896	0.639072	7.13863	9.42657e-13	1.07614e-05	CRKL;MAP2K4;MAP3K1;MEF2C;PRKCA
954	angiotensin ii mediated activation of jnk pathway via pyk2 dependent signaling	ceRNA	DDX3X	34	19	5	0.437896	0.639072	7.13863	9.42657e-13	1.07614e-05	ATF2;GNAQ;MAP3K1;MAPK1;SOS1
955	angiotensin ii mediated activation of jnk pathway via pyk2 dependent signaling	ceRNA	ELK3	34	19	6	0.437896	0.639072	8.7034	3.22086e-18	3.67694e-11	MAP3K1;MAPK1;MEF2A;MEF2C;PRKCA;SOS1
956	angiotensin ii mediated activation of jnk pathway via pyk2 dependent signaling	ceRNA	FMR1	34	19	6	0.437896	0.639072	8.7034	3.22086e-18	3.67694e-11	MAP2K4;MAP3K1;MAPK1;MEF2A;MEF2D;SOS1
957	angiotensin ii mediated activation of jnk pathway via pyk2 dependent signaling	ceRNA	FOXJ3	34	19	5	0.437896	0.639072	7.13863	9.42657e-13	1.07614e-05	ATF2;MAP3K1;MAPK1;MEF2A;SOS1
958	angiotensin ii mediated activation of jnk pathway via pyk2 dependent signaling	ceRNA	FRS2	34	19	5	0.437896	0.639072	7.13863	9.42657e-13	1.07614e-05	CRKL;MAP2K4;MAP3K1;MEF2C;SOS1
959	angiotensin ii mediated activation of jnk pathway via pyk2 dependent signaling	ceRNA	FUBP3	34	19	7	0.437896	0.639072	10.2682	9.80163e-25	1.11896e-17	ATF2;CRKL;MAP2K4;MAP3K1;MAPK1;MEF2A;SOS1
960	angiotensin ii mediated activation of jnk pathway via pyk2 dependent signaling	ceRNA	KIF5B	34	19	5	0.437896	0.639072	7.13863	9.42657e-13	1.07614e-05	ATF2;MAP2K4;MEF2A;MEF2D;SOS1
961	angiotensin ii mediated activation of jnk pathway via pyk2 dependent signaling	ceRNA	KLHL15	34	19	5	0.437896	0.639072	7.13863	9.42657e-13	1.07614e-05	MAP3K1;MAPK1;MEF2A;MEF2C;SOS1
962	angiotensin ii mediated activation of jnk pathway via pyk2 dependent signaling	ceRNA	KPNA3	34	19	5	0.437896	0.639072	7.13863	9.42657e-13	1.07614e-05	GNAQ;MAP3K1;MAPK1;MEF2C;SOS1
963	angiotensin ii mediated activation of jnk pathway via pyk2 dependent signaling	ceRNA	LCOR	34	19	8	0.437896	0.639072	11.8329	2.63865e-32	3.01229e-25	CRKL;MAP2K4;MAP3K1;MAPK1;MEF2A;MEF2C;MEF2D;SOS1
964	angiotensin ii mediated activation of jnk pathway via pyk2 dependent signaling	ceRNA	LCORL	34	19	6	0.437896	0.639072	8.7034	3.22086e-18	3.67694e-11	ATF2;MAP3K1;MAPK1;MEF2A;MEF2C;SOS1
965	angiotensin ii mediated activation of jnk pathway via pyk2 dependent signaling	ceRNA	MAST4	34	19	5	0.437896	0.639072	7.13863	9.42657e-13	1.07614e-05	MAP2K4;MAP3K1;MEF2A;MEF2D;SOS1
966	angiotensin ii mediated activation of jnk pathway via pyk2 dependent signaling	ceRNA	MIER3	34	19	5	0.437896	0.639072	7.13863	9.42657e-13	1.07614e-05	MAP2K4;MAP3K1;MAPK1;MEF2A;SOS1
967	angiotensin ii mediated activation of jnk pathway via pyk2 dependent signaling	ceRNA	MTF1	34	19	5	0.437896	0.639072	7.13863	9.42657e-13	1.07614e-05	MAP2K1;MAP3K1;MAPK1;MEF2A;SOS1
968	angiotensin ii mediated activation of jnk pathway via pyk2 dependent signaling	ceRNA	NF1	34	19	5	0.437896	0.639072	7.13863	9.42657e-13	1.07614e-05	MAP2K4;MEF2A;MEF2D;RAF1;SOS1
969	angiotensin ii mediated activation of jnk pathway via pyk2 dependent signaling	ceRNA	NUFIP2	34	19	5	0.437896	0.639072	7.13863	9.42657e-13	1.07614e-05	MAP3K1;MAPK1;MEF2A;RAF1;SOS1
970	angiotensin ii mediated activation of jnk pathway via pyk2 dependent signaling	ceRNA	OTUD4	34	19	6	0.437896	0.639072	8.7034	3.22086e-18	3.67694e-11	CRKL;MAP3K1;MAPK1;MEF2A;MEF2D;SOS1
971	angiotensin ii mediated activation of jnk pathway via pyk2 dependent signaling	ceRNA	PPP1R12A	34	19	6	0.437896	0.639072	8.7034	3.22086e-18	3.67694e-11	MAP2K4;MAP3K1;MAPK1;MEF2A;MEF2C;MEF2D
972	angiotensin ii mediated activation of jnk pathway via pyk2 dependent signaling	ceRNA	PPP2R5E	34	19	6	0.437896	0.639072	8.7034	3.22086e-18	3.67694e-11	ATF2;MAP2K4;MAP3K1;MAPK1;MEF2A;SOS1
973	angiotensin ii mediated activation of jnk pathway via pyk2 dependent signaling	ceRNA	RBM12	34	19	5	0.437896	0.639072	7.13863	9.42657e-13	1.07614e-05	CRKL;MAP2K4;MAP3K1;MAPK1;SOS1
974	angiotensin ii mediated activation of jnk pathway via pyk2 dependent signaling	ceRNA	RSBN1	34	19	5	0.437896	0.639072	7.13863	9.42657e-13	1.07614e-05	MAP2K4;MAP3K1;MAPK1;MEF2A;SOS1
975	angiotensin ii mediated activation of jnk pathway via pyk2 dependent signaling	ceRNA	RYBP	34	19	5	0.437896	0.639072	7.13863	9.42657e-13	1.07614e-05	ATF2;MAP3K1;MEF2A;MEF2C;RAF1
976	angiotensin ii mediated activation of jnk pathway via pyk2 dependent signaling	ceRNA	SYNCRIP	34	19	6	0.437896	0.639072	8.7034	3.22086e-18	3.67694e-11	ATF2;MAP3K1;MAPK1;MEF2A;MEF2C;SOS1
977	angiotensin ii mediated activation of jnk pathway via pyk2 dependent signaling	ceRNA	TCF4	34	19	10	0.437896	0.639072	14.9625	1.29084e-50	1.47363e-43	ATF2;FOS;MAP2K4;MAP3K1;MAPK1;MEF2A;MEF2C;PRKCA;PRKCB;SOS1
978	angiotensin ii mediated activation of jnk pathway via pyk2 dependent signaling	ceRNA	TNPO1	34	19	6	0.437896	0.639072	8.7034	3.22086e-18	3.67694e-11	ATF2;GNAQ;GRB2;MAP3K1;MAPK1;SOS1
979	angiotensin ii mediated activation of jnk pathway via pyk2 dependent signaling	ceRNA	TRIM33	34	19	5	0.437896	0.639072	7.13863	9.42657e-13	1.07614e-05	ATF2;CRKL;MAP2K4;MAP3K1;MEF2A
980	angiotensin ii mediated activation of jnk pathway via pyk2 dependent signaling	ceRNA	YTHDF3	34	19	7	0.437896	0.639072	10.2682	9.80163e-25	1.11896e-17	ATF2;MAP2K4;MAP3K1;MAPK1;MEF2A;MEF2C;SOS1
981	angiotensin ii mediated activation of jnk pathway via pyk2 dependent signaling	ceRNA	ZEB1	34	19	6	0.437896	0.639072	8.7034	3.22086e-18	3.67694e-11	ATF2;FOS;MAP2K4;MAPK1;MEF2A;PRKCA
982	angiotensin ii mediated activation of jnk pathway via pyk2 dependent signaling	ceRNA	ZEB2	34	19	6	0.437896	0.639072	8.7034	3.22086e-18	3.67694e-11	MAP2K4;MAP3K1;MAPK1;MEF2A;PRKCA;PRKCB
983	angiotensin ii mediated activation of jnk pathway via pyk2 dependent signaling	ceRNA	ZFHX4	34	19	7	0.437896	0.639072	10.2682	9.80163e-25	1.11896e-17	ATF2;FOS;MAP3K1;MAPK1;MEF2A;MEF2C;MEF2D
984	angiotensin ii mediated activation of jnk pathway via pyk2 dependent signaling	ceRNA	ZNF148	34	19	5	0.437896	0.639072	7.13863	9.42657e-13	1.07614e-05	MAP3K1;MAPK1;MEF2A;MEF2D;SOS1
985	apoptotic signaling in response to dna damage	ceRNA	AFF4	14	5	1	0.0182116	0.134434	7.30312	2.8117e-13	3.20985e-06	BCL2
986	apoptotic signaling in response to dna damage	ceRNA	AHCYL2	14	5	1	0.0182116	0.134434	7.30312	2.8117e-13	3.20985e-06	BCL2
987	apoptotic signaling in response to dna damage	ceRNA	ANKRA2	14	5	2	0.0182116	0.134434	14.7417	3.47915e-49	3.97181e-42	BCL2L1;TP53
988	apoptotic signaling in response to dna damage	ceRNA	BAZ2B	14	5	1	0.0182116	0.134434	7.30312	2.8117e-13	3.20985e-06	APAF1
989	apoptotic signaling in response to dna damage	ceRNA	BCL11A	14	5	1	0.0182116	0.134434	7.30312	2.8117e-13	3.20985e-06	BCL2
990	apoptotic signaling in response to dna damage	ceRNA	C12orf76	14	5	1	0.0182116	0.134434	7.30312	2.8117e-13	3.20985e-06	BCL2
991	apoptotic signaling in response to dna damage	ceRNA	C16orf52	14	5	1	0.0182116	0.134434	7.30312	2.8117e-13	3.20985e-06	BCL2
992	apoptotic signaling in response to dna damage	ceRNA	CDC25A	14	5	1	0.0182116	0.134434	7.30312	2.8117e-13	3.20985e-06	TP53
993	apoptotic signaling in response to dna damage	ceRNA	CDK17	14	5	1	0.0182116	0.134434	7.30312	2.8117e-13	3.20985e-06	BCL2
994	apoptotic signaling in response to dna damage	ceRNA	CHIC1	14	5	1	0.0182116	0.134434	7.30312	2.8117e-13	3.20985e-06	BCL2
995	apoptotic signaling in response to dna damage	ceRNA	CNOT2	14	5	1	0.0182116	0.134434	7.30312	2.8117e-13	3.20985e-06	CASP3
996	apoptotic signaling in response to dna damage	ceRNA	CPEB3	14	5	1	0.0182116	0.134434	7.30312	2.8117e-13	3.20985e-06	BCL2
997	apoptotic signaling in response to dna damage	ceRNA	CPEB4	14	5	1	0.0182116	0.134434	7.30312	2.8117e-13	3.20985e-06	APAF1
998	apoptotic signaling in response to dna damage	ceRNA	CREBL2	14	5	1	0.0182116	0.134434	7.30312	2.8117e-13	3.20985e-06	BCL2
999	apoptotic signaling in response to dna damage	ceRNA	CTCF	14	5	1	0.0182116	0.134434	7.30312	2.8117e-13	3.20985e-06	APAF1
1000	apoptotic signaling in response to dna damage	ceRNA	DCLK1	14	5	1	0.0182116	0.134434	7.30312	2.8117e-13	3.20985e-06	BCL2
1001	apoptotic signaling in response to dna damage	ceRNA	DDN	14	5	1	0.0182116	0.134434	7.30312	2.8117e-13	3.20985e-06	TP53
1002	apoptotic signaling in response to dna damage	ceRNA	EIF2C4	14	5	1	0.0182116	0.134434	7.30312	2.8117e-13	3.20985e-06	CASP3
1003	apoptotic signaling in response to dna damage	ceRNA	EIF2S2	14	5	1	0.0182116	0.134434	7.30312	2.8117e-13	3.20985e-06	CASP3
1004	apoptotic signaling in response to dna damage	ceRNA	EIF4G2	14	5	1	0.0182116	0.134434	7.30312	2.8117e-13	3.20985e-06	CASP3
1005	apoptotic signaling in response to dna damage	ceRNA	ERGIC1	14	5	2	0.0182116	0.134434	14.7417	3.47915e-49	3.97181e-42	BCL2L1;TP53
1006	apoptotic signaling in response to dna damage	ceRNA	EXOC5	14	5	1	0.0182116	0.134434	7.30312	2.8117e-13	3.20985e-06	CASP3
1007	apoptotic signaling in response to dna damage	ceRNA	FAM179B	14	5	1	0.0182116	0.134434	7.30312	2.8117e-13	3.20985e-06	BCL2
1008	apoptotic signaling in response to dna damage	ceRNA	FAM196A	14	5	1	0.0182116	0.134434	7.30312	2.8117e-13	3.20985e-06	BCL2
1009	apoptotic signaling in response to dna damage	ceRNA	FBXL20	14	5	1	0.0182116	0.134434	7.30312	2.8117e-13	3.20985e-06	BCL2
1010	apoptotic signaling in response to dna damage	ceRNA	FNIP1	14	5	1	0.0182116	0.134434	7.30312	2.8117e-13	3.20985e-06	BCL2L1
1011	apoptotic signaling in response to dna damage	ceRNA	FRS2	14	5	1	0.0182116	0.134434	7.30312	2.8117e-13	3.20985e-06	BCL2
1012	apoptotic signaling in response to dna damage	ceRNA	FUBP3	14	5	1	0.0182116	0.134434	7.30312	2.8117e-13	3.20985e-06	APAF1
1013	apoptotic signaling in response to dna damage	ceRNA	GALNT7	14	5	1	0.0182116	0.134434	7.30312	2.8117e-13	3.20985e-06	BCL2
1014	apoptotic signaling in response to dna damage	ceRNA	GAN	14	5	1	0.0182116	0.134434	7.30312	2.8117e-13	3.20985e-06	CASP3
1015	apoptotic signaling in response to dna damage	ceRNA	GOLGA1	14	5	1	0.0182116	0.134434	7.30312	2.8117e-13	3.20985e-06	BCL2
1016	apoptotic signaling in response to dna damage	ceRNA	GPR156	14	5	1	0.0182116	0.134434	7.30312	2.8117e-13	3.20985e-06	TP53
1017	apoptotic signaling in response to dna damage	ceRNA	HAND2	14	5	1	0.0182116	0.134434	7.30312	2.8117e-13	3.20985e-06	CASP3
1018	apoptotic signaling in response to dna damage	ceRNA	HCN1	14	5	1	0.0182116	0.134434	7.30312	2.8117e-13	3.20985e-06	BCL2
1019	apoptotic signaling in response to dna damage	ceRNA	IGDCC3	14	5	1	0.0182116	0.134434	7.30312	2.8117e-13	3.20985e-06	BCL2L1
1020	apoptotic signaling in response to dna damage	ceRNA	IRF2BPL	14	5	1	0.0182116	0.134434	7.30312	2.8117e-13	3.20985e-06	BCL2
1021	apoptotic signaling in response to dna damage	ceRNA	LCOR	14	5	1	0.0182116	0.134434	7.30312	2.8117e-13	3.20985e-06	BCL2
1022	apoptotic signaling in response to dna damage	ceRNA	LPHN2	14	5	1	0.0182116	0.134434	7.30312	2.8117e-13	3.20985e-06	BCL2
1023	apoptotic signaling in response to dna damage	ceRNA	LRFN2	14	5	1	0.0182116	0.134434	7.30312	2.8117e-13	3.20985e-06	BCL2
1024	apoptotic signaling in response to dna damage	ceRNA	MAP4K3	14	5	1	0.0182116	0.134434	7.30312	2.8117e-13	3.20985e-06	CASP3
1025	apoptotic signaling in response to dna damage	ceRNA	MAST4	14	5	1	0.0182116	0.134434	7.30312	2.8117e-13	3.20985e-06	BCL2
1026	apoptotic signaling in response to dna damage	ceRNA	MED13	14	5	1	0.0182116	0.134434	7.30312	2.8117e-13	3.20985e-06	BCL2
1027	apoptotic signaling in response to dna damage	ceRNA	MYB	14	5	1	0.0182116	0.134434	7.30312	2.8117e-13	3.20985e-06	BCL2
1028	apoptotic signaling in response to dna damage	ceRNA	NAA30	14	5	1	0.0182116	0.134434	7.30312	2.8117e-13	3.20985e-06	CASP3
1029	apoptotic signaling in response to dna damage	ceRNA	NCOA1	14	5	1	0.0182116	0.134434	7.30312	2.8117e-13	3.20985e-06	BCL2L1
1030	apoptotic signaling in response to dna damage	ceRNA	NFIB	14	5	1	0.0182116	0.134434	7.30312	2.8117e-13	3.20985e-06	BCL2
1031	apoptotic signaling in response to dna damage	ceRNA	NOVA1	14	5	1	0.0182116	0.134434	7.30312	2.8117e-13	3.20985e-06	BCL2
1032	apoptotic signaling in response to dna damage	ceRNA	NPAS3	14	5	1	0.0182116	0.134434	7.30312	2.8117e-13	3.20985e-06	BCL2
1033	apoptotic signaling in response to dna damage	ceRNA	OGT	14	5	1	0.0182116	0.134434	7.30312	2.8117e-13	3.20985e-06	BCL2
1034	apoptotic signaling in response to dna damage	ceRNA	PAPD4	14	5	1	0.0182116	0.134434	7.30312	2.8117e-13	3.20985e-06	BCL2
1035	apoptotic signaling in response to dna damage	ceRNA	PCDH19	14	5	1	0.0182116	0.134434	7.30312	2.8117e-13	3.20985e-06	BCL2
1036	apoptotic signaling in response to dna damage	ceRNA	PELI1	14	5	1	0.0182116	0.134434	7.30312	2.8117e-13	3.20985e-06	BCL2
1037	apoptotic signaling in response to dna damage	ceRNA	PLAGL1	14	5	1	0.0182116	0.134434	7.30312	2.8117e-13	3.20985e-06	BCL2
1038	apoptotic signaling in response to dna damage	ceRNA	PLDN	14	5	1	0.0182116	0.134434	7.30312	2.8117e-13	3.20985e-06	CASP3
1039	apoptotic signaling in response to dna damage	ceRNA	PPM1A	14	5	1	0.0182116	0.134434	7.30312	2.8117e-13	3.20985e-06	BCL2
1040	apoptotic signaling in response to dna damage	ceRNA	PPP1R14C	14	5	1	0.0182116	0.134434	7.30312	2.8117e-13	3.20985e-06	BCL2
1041	apoptotic signaling in response to dna damage	ceRNA	PPP6C	14	5	1	0.0182116	0.134434	7.30312	2.8117e-13	3.20985e-06	BCL2
1042	apoptotic signaling in response to dna damage	ceRNA	PRDM1	14	5	1	0.0182116	0.134434	7.30312	2.8117e-13	3.20985e-06	CASP3
1043	apoptotic signaling in response to dna damage	ceRNA	RCOR3	14	5	1	0.0182116	0.134434	7.30312	2.8117e-13	3.20985e-06	BCL2
1044	apoptotic signaling in response to dna damage	ceRNA	REEP1	14	5	1	0.0182116	0.134434	7.30312	2.8117e-13	3.20985e-06	BCL2L1
1045	apoptotic signaling in response to dna damage	ceRNA	REV1	14	5	1	0.0182116	0.134434	7.30312	2.8117e-13	3.20985e-06	BCL2
1046	apoptotic signaling in response to dna damage	ceRNA	RHOB	14	5	1	0.0182116	0.134434	7.30312	2.8117e-13	3.20985e-06	BCL2
1047	apoptotic signaling in response to dna damage	ceRNA	RNF111	14	5	1	0.0182116	0.134434	7.30312	2.8117e-13	3.20985e-06	BCL2
1048	apoptotic signaling in response to dna damage	ceRNA	SEMA6D	14	5	1	0.0182116	0.134434	7.30312	2.8117e-13	3.20985e-06	BCL2
1049	apoptotic signaling in response to dna damage	ceRNA	SEZ6L	14	5	1	0.0182116	0.134434	7.30312	2.8117e-13	3.20985e-06	BCL2
1050	apoptotic signaling in response to dna damage	ceRNA	SIRT1	14	5	1	0.0182116	0.134434	7.30312	2.8117e-13	3.20985e-06	BCL2
1051	apoptotic signaling in response to dna damage	ceRNA	SLCO5A1	14	5	1	0.0182116	0.134434	7.30312	2.8117e-13	3.20985e-06	TP53
1052	apoptotic signaling in response to dna damage	ceRNA	SMC1A	14	5	1	0.0182116	0.134434	7.30312	2.8117e-13	3.20985e-06	CASP3
1053	apoptotic signaling in response to dna damage	ceRNA	SPRYD3	14	5	1	0.0182116	0.134434	7.30312	2.8117e-13	3.20985e-06	BCL2
1054	apoptotic signaling in response to dna damage	ceRNA	SRSF10	14	5	1	0.0182116	0.134434	7.30312	2.8117e-13	3.20985e-06	BCL2
1055	apoptotic signaling in response to dna damage	ceRNA	STARD13	14	5	1	0.0182116	0.134434	7.30312	2.8117e-13	3.20985e-06	CASP3
1056	apoptotic signaling in response to dna damage	ceRNA	TAB3	14	5	1	0.0182116	0.134434	7.30312	2.8117e-13	3.20985e-06	BCL2
1057	apoptotic signaling in response to dna damage	ceRNA	TBL1XR1	14	5	1	0.0182116	0.134434	7.30312	2.8117e-13	3.20985e-06	BCL2
1058	apoptotic signaling in response to dna damage	ceRNA	TJP1	14	5	1	0.0182116	0.134434	7.30312	2.8117e-13	3.20985e-06	CASP3
1059	apoptotic signaling in response to dna damage	ceRNA	TMEM161B	14	5	1	0.0182116	0.134434	7.30312	2.8117e-13	3.20985e-06	BCL2
1060	apoptotic signaling in response to dna damage	ceRNA	TTC39A	14	5	1	0.0182116	0.134434	7.30312	2.8117e-13	3.20985e-06	BCL2
1061	apoptotic signaling in response to dna damage	ceRNA	UBN2	14	5	1	0.0182116	0.134434	7.30312	2.8117e-13	3.20985e-06	BCL2
1062	apoptotic signaling in response to dna damage	ceRNA	UBXN4	14	5	1	0.0182116	0.134434	7.30312	2.8117e-13	3.20985e-06	CASP3
1063	apoptotic signaling in response to dna damage	ceRNA	USP38	14	5	2	0.0182116	0.134434	14.7417	3.47915e-49	3.97181e-42	BCL2L1;CASP3
1064	apoptotic signaling in response to dna damage	ceRNA	WWP1	14	5	1	0.0182116	0.134434	7.30312	2.8117e-13	3.20985e-06	BCL2
1065	apoptotic signaling in response to dna damage	ceRNA	ZADH2	14	5	1	0.0182116	0.134434	7.30312	2.8117e-13	3.20985e-06	BCL2
1066	apoptotic signaling in response to dna damage	ceRNA	ZBTB39	14	5	1	0.0182116	0.134434	7.30312	2.8117e-13	3.20985e-06	CASP3
1067	apoptotic signaling in response to dna damage	ceRNA	ZDHHC17	14	5	1	0.0182116	0.134434	7.30312	2.8117e-13	3.20985e-06	BCL2
1068	apoptotic signaling in response to dna damage	ceRNA	ZFYVE16	14	5	1	0.0182116	0.134434	7.30312	2.8117e-13	3.20985e-06	BCL2L1
1069	apoptotic signaling in response to dna damage	ceRNA	ZNF280D	14	5	1	0.0182116	0.134434	7.30312	2.8117e-13	3.20985e-06	BCL2
1070	apoptotic signaling in response to dna damage	ceRNA	ZSWIM6	14	5	1	0.0182116	0.134434	7.30312	2.8117e-13	3.20985e-06	BCL2
1071	aspirin blocks signaling pathway involved in platelet activation	ceRNA	ANK2	17	8	3	0.146307	0.37588	7.59203	3.14932e-14	3.59527e-07	GNAI1;GNB1;PLCB1
1072	aspirin blocks signaling pathway involved in platelet activation	ceRNA	ATL2	17	8	3	0.146307	0.37588	7.59203	3.14932e-14	3.59527e-07	GNAI1;MAPK1;PLCB1
1073	aspirin blocks signaling pathway involved in platelet activation	ceRNA	BNC2	17	8	3	0.146307	0.37588	7.59203	3.14932e-14	3.59527e-07	GNAI1;PLCB1;PRKCB
1074	aspirin blocks signaling pathway involved in platelet activation	ceRNA	C5orf24	17	8	3	0.146307	0.37588	7.59203	3.14932e-14	3.59527e-07	GNB1;MAP2K1;MAPK1
1075	aspirin blocks signaling pathway involved in platelet activation	ceRNA	CDK17	17	8	4	0.146307	0.37588	10.2525	1.15322e-24	1.31652e-17	GNB1;MAP2K1;MAPK1;PLCB1
1076	aspirin blocks signaling pathway involved in platelet activation	ceRNA	CELF2	17	8	3	0.146307	0.37588	7.59203	3.14932e-14	3.59527e-07	GNAI1;PLCB1;PRKCB
1077	aspirin blocks signaling pathway involved in platelet activation	ceRNA	CREBRF	17	8	4	0.146307	0.37588	10.2525	1.15322e-24	1.31652e-17	GNAI1;GNB1;MAPK1;RAF1
1078	aspirin blocks signaling pathway involved in platelet activation	ceRNA	ELK3	17	8	4	0.146307	0.37588	10.2525	1.15322e-24	1.31652e-17	GNAI1;MAPK1;PLCB1;PRKCA
1079	aspirin blocks signaling pathway involved in platelet activation	ceRNA	FOXO1	17	8	3	0.146307	0.37588	7.59203	3.14932e-14	3.59527e-07	GNAI1;GNB1;PLCB1
1080	aspirin blocks signaling pathway involved in platelet activation	ceRNA	FOXP2	17	8	3	0.146307	0.37588	7.59203	3.14932e-14	3.59527e-07	GNAI1;GNB1;PLCB1
1081	aspirin blocks signaling pathway involved in platelet activation	ceRNA	KIF23	17	8	3	0.146307	0.37588	7.59203	3.14932e-14	3.59527e-07	MAP2K1;PLCB1;RAF1
1082	aspirin blocks signaling pathway involved in platelet activation	ceRNA	LCOR	17	8	3	0.146307	0.37588	7.59203	3.14932e-14	3.59527e-07	GNB1;MAPK1;PLCB1
1083	aspirin blocks signaling pathway involved in platelet activation	ceRNA	LRCH1	17	8	4	0.146307	0.37588	10.2525	1.15322e-24	1.31652e-17	GNAI1;GNB1;MAPK1;PLCB1
1084	aspirin blocks signaling pathway involved in platelet activation	ceRNA	PCDH7	17	8	3	0.146307	0.37588	7.59203	3.14932e-14	3.59527e-07	GNAI1;GNB1;PLCB1
1085	aspirin blocks signaling pathway involved in platelet activation	ceRNA	RSBN1	17	8	3	0.146307	0.37588	7.59203	3.14932e-14	3.59527e-07	GNB1;MAPK1;PLCB1
1086	aspirin blocks signaling pathway involved in platelet activation	ceRNA	SOCS5	17	8	3	0.146307	0.37588	7.59203	3.14932e-14	3.59527e-07	GNAI1;GNB1;PLCB1
1087	aspirin blocks signaling pathway involved in platelet activation	ceRNA	TACC1	17	8	3	0.146307	0.37588	7.59203	3.14932e-14	3.59527e-07	MAP2K1;MAPK1;PLCB1
1088	aspirin blocks signaling pathway involved in platelet activation	ceRNA	TAF5	17	8	4	0.146307	0.37588	10.2525	1.15322e-24	1.31652e-17	GNAI1;MAP2K1;PLCB1;RAF1
1089	aspirin blocks signaling pathway involved in platelet activation	ceRNA	TBC1D9	17	8	3	0.146307	0.37588	7.59203	3.14932e-14	3.59527e-07	GNAI1;MAP2K1;PLCB1
1090	aspirin blocks signaling pathway involved in platelet activation	ceRNA	TCF4	17	8	6	0.146307	0.37588	15.5733	1.10553e-54	1.26208e-47	GNAI1;GNB1;MAPK1;PLCB1;PRKCA;PRKCB
1091	aspirin blocks signaling pathway involved in platelet activation	ceRNA	ZEB1	17	8	3	0.146307	0.37588	7.59203	3.14932e-14	3.59527e-07	MAPK1;PLCB1;PRKCA
1092	aspirin blocks signaling pathway involved in platelet activation	ceRNA	ZEB2	17	8	6	0.146307	0.37588	15.5733	1.10553e-54	1.26208e-47	GNAI1;GNB1;MAPK1;PLCB1;PRKCA;PRKCB
1093	aspirin blocks signaling pathway involved in platelet activation	ceRNA	ZFPM2	17	8	4	0.146307	0.37588	10.2525	1.15322e-24	1.31652e-17	GNAI1;GNB1;PLCB1;PRKCA
1094	atm signaling pathway	ceRNA	AFF1	18	5	1	0.00716186	0.0845587	11.7414	7.81814e-32	8.92521e-25	RBBP8
1095	atm signaling pathway	ceRNA	ANKRA2	18	5	1	0.00716186	0.0845587	11.7414	7.81814e-32	8.92521e-25	TP53
1096	atm signaling pathway	ceRNA	ARHGEF4	18	5	1	0.00716186	0.0845587	11.7414	7.81814e-32	8.92521e-25	GADD45A
1097	atm signaling pathway	ceRNA	BCL11A	18	5	1	0.00716186	0.0845587	11.7414	7.81814e-32	8.92521e-25	RPA1
1098	atm signaling pathway	ceRNA	CCNE1	18	5	1	0.00716186	0.0845587	11.7414	7.81814e-32	8.92521e-25	CHEK1
1099	atm signaling pathway	ceRNA	CDC25A	18	5	2	0.00716186	0.0845587	23.5675	8.30606e-123	9.48222e-116	CHEK1;TP53
1100	atm signaling pathway	ceRNA	CEP55	18	5	1	0.00716186	0.0845587	11.7414	7.81814e-32	8.92521e-25	CHEK1
1101	atm signaling pathway	ceRNA	DDN	18	5	1	0.00716186	0.0845587	11.7414	7.81814e-32	8.92521e-25	TP53
1102	atm signaling pathway	ceRNA	E2F7	18	5	1	0.00716186	0.0845587	11.7414	7.81814e-32	8.92521e-25	RPA1
1103	atm signaling pathway	ceRNA	EED	18	5	1	0.00716186	0.0845587	11.7414	7.81814e-32	8.92521e-25	CHEK1
1104	atm signaling pathway	ceRNA	ELK3	18	5	1	0.00716186	0.0845587	11.7414	7.81814e-32	8.92521e-25	RBBP8
1105	atm signaling pathway	ceRNA	ERGIC1	18	5	1	0.00716186	0.0845587	11.7414	7.81814e-32	8.92521e-25	TP53
1106	atm signaling pathway	ceRNA	ESR1	18	5	1	0.00716186	0.0845587	11.7414	7.81814e-32	8.92521e-25	RBBP8
1107	atm signaling pathway	ceRNA	FANCA	18	5	1	0.00716186	0.0845587	11.7414	7.81814e-32	8.92521e-25	RBBP8
1108	atm signaling pathway	ceRNA	FIBIN	18	5	1	0.00716186	0.0845587	11.7414	7.81814e-32	8.92521e-25	GADD45A
1109	atm signaling pathway	ceRNA	FOXO1	18	5	1	0.00716186	0.0845587	11.7414	7.81814e-32	8.92521e-25	GADD45A
1110	atm signaling pathway	ceRNA	FRY	18	5	1	0.00716186	0.0845587	11.7414	7.81814e-32	8.92521e-25	RBBP8
1111	atm signaling pathway	ceRNA	GNA13	18	5	1	0.00716186	0.0845587	11.7414	7.81814e-32	8.92521e-25	RPA1
1112	atm signaling pathway	ceRNA	GPR156	18	5	1	0.00716186	0.0845587	11.7414	7.81814e-32	8.92521e-25	TP53
1113	atm signaling pathway	ceRNA	HBP1	18	5	1	0.00716186	0.0845587	11.7414	7.81814e-32	8.92521e-25	RBBP8
1114	atm signaling pathway	ceRNA	KIF23	18	5	1	0.00716186	0.0845587	11.7414	7.81814e-32	8.92521e-25	CHEK1
1115	atm signaling pathway	ceRNA	MKL2	18	5	1	0.00716186	0.0845587	11.7414	7.81814e-32	8.92521e-25	RBBP8
1116	atm signaling pathway	ceRNA	NBEA	18	5	1	0.00716186	0.0845587	11.7414	7.81814e-32	8.92521e-25	RBBP8
1117	atm signaling pathway	ceRNA	PRPF40A	18	5	1	0.00716186	0.0845587	11.7414	7.81814e-32	8.92521e-25	RPA1
1118	atm signaling pathway	ceRNA	RNF145	18	5	1	0.00716186	0.0845587	11.7414	7.81814e-32	8.92521e-25	RBBP8
1119	atm signaling pathway	ceRNA	SEC24D	18	5	1	0.00716186	0.0845587	11.7414	7.81814e-32	8.92521e-25	RPA1
1120	atm signaling pathway	ceRNA	SLCO5A1	18	5	1	0.00716186	0.0845587	11.7414	7.81814e-32	8.92521e-25	TP53
1121	atm signaling pathway	ceRNA	SMURF2	18	5	1	0.00716186	0.0845587	11.7414	7.81814e-32	8.92521e-25	CHEK1
1122	atm signaling pathway	ceRNA	SPRYD3	18	5	1	0.00716186	0.0845587	11.7414	7.81814e-32	8.92521e-25	CHEK1
1123	atm signaling pathway	ceRNA	SRPR	18	5	1	0.00716186	0.0845587	11.7414	7.81814e-32	8.92521e-25	CHEK1
1124	atm signaling pathway	ceRNA	SYBU	18	5	1	0.00716186	0.0845587	11.7414	7.81814e-32	8.92521e-25	RBBP8
1125	atm signaling pathway	ceRNA	SYNCRIP	18	5	1	0.00716186	0.0845587	11.7414	7.81814e-32	8.92521e-25	RPA1
1126	atm signaling pathway	ceRNA	ZBTB4	18	5	1	0.00716186	0.0845587	11.7414	7.81814e-32	8.92521e-25	RBBP8
1127	atm signaling pathway	ceRNA	ZNF148	18	5	1	0.00716186	0.0845587	11.7414	7.81814e-32	8.92521e-25	RPA1
1128	attenuation of gpcr signaling	ceRNA	ADD3	13	8	2	0.0802129	0.280115	6.85356	7.20344e-12	8.22347e-05	PRKACB;PRKCB
1129	attenuation of gpcr signaling	ceRNA	BCL11A	13	8	2	0.0802129	0.280115	6.85356	7.20344e-12	8.22347e-05	PRKAR1A;PRKCB
1130	attenuation of gpcr signaling	ceRNA	BNC2	13	8	3	0.0802129	0.280115	10.4235	1.93691e-25	2.21118e-18	PRKACB;PRKAR1A;PRKCB
1131	attenuation of gpcr signaling	ceRNA	CAND1	13	8	2	0.0802129	0.280115	6.85356	7.20344e-12	8.22347e-05	GNB1;PRKAR1A
1132	attenuation of gpcr signaling	ceRNA	CDK17	13	8	2	0.0802129	0.280115	6.85356	7.20344e-12	8.22347e-05	GNB1;PRKACB
1133	attenuation of gpcr signaling	ceRNA	CELF2	13	8	3	0.0802129	0.280115	10.4235	1.93691e-25	2.21118e-18	PRKACB;PRKAR1A;PRKCB
1134	attenuation of gpcr signaling	ceRNA	CHD9	13	8	2	0.0802129	0.280115	6.85356	7.20344e-12	8.22347e-05	PRKACB;PRKAR1A
1135	attenuation of gpcr signaling	ceRNA	CPEB2	13	8	3	0.0802129	0.280115	10.4235	1.93691e-25	2.21118e-18	GNB1;PRKACB;PRKAR2B
1136	attenuation of gpcr signaling	ceRNA	CPEB4	13	8	2	0.0802129	0.280115	6.85356	7.20344e-12	8.22347e-05	GNB1;PRKACB
1137	attenuation of gpcr signaling	ceRNA	CREBRF	13	8	2	0.0802129	0.280115	6.85356	7.20344e-12	8.22347e-05	GNB1;PRKAR1A
1138	attenuation of gpcr signaling	ceRNA	CTDSPL2	13	8	3	0.0802129	0.280115	10.4235	1.93691e-25	2.21118e-18	GNB1;PRKAR1A;PRKCA
1139	attenuation of gpcr signaling	ceRNA	DOCK7	13	8	2	0.0802129	0.280115	6.85356	7.20344e-12	8.22347e-05	PRKACB;PRKAR1A
1140	attenuation of gpcr signaling	ceRNA	DYNC1LI2	13	8	2	0.0802129	0.280115	6.85356	7.20344e-12	8.22347e-05	GNB1;PRKACB
1141	attenuation of gpcr signaling	ceRNA	DYRK2	13	8	2	0.0802129	0.280115	6.85356	7.20344e-12	8.22347e-05	PRKACB;PRKAR1A
1142	attenuation of gpcr signaling	ceRNA	ELK3	13	8	2	0.0802129	0.280115	6.85356	7.20344e-12	8.22347e-05	PRKACB;PRKCA
1143	attenuation of gpcr signaling	ceRNA	FAM91A1	13	8	2	0.0802129	0.280115	6.85356	7.20344e-12	8.22347e-05	GNB1;PRKAR2A
1144	attenuation of gpcr signaling	ceRNA	FAT3	13	8	2	0.0802129	0.280115	6.85356	7.20344e-12	8.22347e-05	GNB1;PRKACB
1145	attenuation of gpcr signaling	ceRNA	FNDC3B	13	8	2	0.0802129	0.280115	6.85356	7.20344e-12	8.22347e-05	PRKACB;PRKAR1A
1146	attenuation of gpcr signaling	ceRNA	FOXN3	13	8	2	0.0802129	0.280115	6.85356	7.20344e-12	8.22347e-05	PRKACB;PRKCB
1147	attenuation of gpcr signaling	ceRNA	FOXP2	13	8	2	0.0802129	0.280115	6.85356	7.20344e-12	8.22347e-05	GNB1;PRKACB
1148	attenuation of gpcr signaling	ceRNA	HIVEP2	13	8	2	0.0802129	0.280115	6.85356	7.20344e-12	8.22347e-05	PRKACB;PRKCA
1149	attenuation of gpcr signaling	ceRNA	IGF2BP2	13	8	2	0.0802129	0.280115	6.85356	7.20344e-12	8.22347e-05	GNAS;PRKACB
1150	attenuation of gpcr signaling	ceRNA	LCOR	13	8	2	0.0802129	0.280115	6.85356	7.20344e-12	8.22347e-05	GNB1;PRKAR1A
1151	attenuation of gpcr signaling	ceRNA	LRCH1	13	8	2	0.0802129	0.280115	6.85356	7.20344e-12	8.22347e-05	GNB1;PRKACB
1152	attenuation of gpcr signaling	ceRNA	MAP3K1	13	8	2	0.0802129	0.280115	6.85356	7.20344e-12	8.22347e-05	GNB1;PRKAR1A
1153	attenuation of gpcr signaling	ceRNA	MEX3B	13	8	2	0.0802129	0.280115	6.85356	7.20344e-12	8.22347e-05	GNB1;PRKACB
1154	attenuation of gpcr signaling	ceRNA	MIER3	13	8	2	0.0802129	0.280115	6.85356	7.20344e-12	8.22347e-05	GNB1;PRKAR2B
1155	attenuation of gpcr signaling	ceRNA	NRP2	13	8	2	0.0802129	0.280115	6.85356	7.20344e-12	8.22347e-05	GNB1;PRKAR1A
1156	attenuation of gpcr signaling	ceRNA	PAFAH1B2	13	8	2	0.0802129	0.280115	6.85356	7.20344e-12	8.22347e-05	PRKAR1A;PRKAR2A
1157	attenuation of gpcr signaling	ceRNA	PTEN	13	8	2	0.0802129	0.280115	6.85356	7.20344e-12	8.22347e-05	PRKACB;PRKAR1A
1158	attenuation of gpcr signaling	ceRNA	RBL2	13	8	2	0.0802129	0.280115	6.85356	7.20344e-12	8.22347e-05	PRKACB;PRKAR1A
1159	attenuation of gpcr signaling	ceRNA	SEMA6D	13	8	2	0.0802129	0.280115	6.85356	7.20344e-12	8.22347e-05	GNB1;PRKAR1A
1160	attenuation of gpcr signaling	ceRNA	SYT1	13	8	2	0.0802129	0.280115	6.85356	7.20344e-12	8.22347e-05	PRKAR2B;PRKCA
1161	attenuation of gpcr signaling	ceRNA	TCF4	13	8	4	0.0802129	0.280115	13.9935	1.70795e-44	1.9498e-37	GNB1;PRKACB;PRKCA;PRKCB
1162	attenuation of gpcr signaling	ceRNA	TET3	13	8	2	0.0802129	0.280115	6.85356	7.20344e-12	8.22347e-05	GNB1;PRKACB
1163	attenuation of gpcr signaling	ceRNA	TOX	13	8	2	0.0802129	0.280115	6.85356	7.20344e-12	8.22347e-05	PRKACB;PRKCB
1164	attenuation of gpcr signaling	ceRNA	UBE2D3	13	8	2	0.0802129	0.280115	6.85356	7.20344e-12	8.22347e-05	GNB1;PRKAR1A
1165	attenuation of gpcr signaling	ceRNA	WAPAL	13	8	2	0.0802129	0.280115	6.85356	7.20344e-12	8.22347e-05	PRKACB;PRKAR1A
1166	attenuation of gpcr signaling	ceRNA	ZC3H12C	13	8	2	0.0802129	0.280115	6.85356	7.20344e-12	8.22347e-05	PRKACB;PRKAR1A
1167	attenuation of gpcr signaling	ceRNA	ZEB1	13	8	2	0.0802129	0.280115	6.85356	7.20344e-12	8.22347e-05	PRKACB;PRKCA
1168	attenuation of gpcr signaling	ceRNA	ZEB2	13	8	5	0.0802129	0.280115	17.5634	4.69753e-69	5.36272e-62	GNB1;PRKACB;PRKAR1A;PRKCA;PRKCB
1169	attenuation of gpcr signaling	ceRNA	ZFPM2	13	8	3	0.0802129	0.280115	10.4235	1.93691e-25	2.21118e-18	GNB1;PRKACB;PRKCA
1170	attenuation of gpcr signaling	ceRNA	ZNF148	13	8	2	0.0802129	0.280115	6.85356	7.20344e-12	8.22347e-05	GNB1;PRKAR1A
1171	b cell survival pathway	ceRNA	AFF4	13	7	3	0.0761204	0.27349	10.691	1.12155e-26	1.28037e-19	ITGB1;PDPK1;PIK3R1
1172	b cell survival pathway	ceRNA	ANKRD50	13	7	2	0.0761204	0.27349	7.03455	1.99905e-12	2.28212e-05	PIK3CA;ZBTB7A
1173	b cell survival pathway	ceRNA	ARID4B	13	7	2	0.0761204	0.27349	7.03455	1.99905e-12	2.28212e-05	ITGB1;PIK3CA
1174	b cell survival pathway	ceRNA	ARID5B	13	7	2	0.0761204	0.27349	7.03455	1.99905e-12	2.28212e-05	PIK3CA;PIK3R1
1175	b cell survival pathway	ceRNA	BNC2	13	7	2	0.0761204	0.27349	7.03455	1.99905e-12	2.28212e-05	PIK3CA;PIK3R1
1176	b cell survival pathway	ceRNA	C11orf30	13	7	2	0.0761204	0.27349	7.03455	1.99905e-12	2.28212e-05	ITGB1;PIK3CA
1177	b cell survival pathway	ceRNA	CREBRF	13	7	4	0.0761204	0.27349	14.3474	1.10607e-46	1.26269e-39	ITGB1;MTOR;PIK3R1;ZBTB7A
1178	b cell survival pathway	ceRNA	CRK	13	7	2	0.0761204	0.27349	7.03455	1.99905e-12	2.28212e-05	ITGB1;PIK3CA
1179	b cell survival pathway	ceRNA	CTDSPL2	13	7	2	0.0761204	0.27349	7.03455	1.99905e-12	2.28212e-05	ITGB1;ZBTB7A
1180	b cell survival pathway	ceRNA	ERBB2IP	13	7	2	0.0761204	0.27349	7.03455	1.99905e-12	2.28212e-05	ITGB1;ZBTB7A
1181	b cell survival pathway	ceRNA	EYA4	13	7	2	0.0761204	0.27349	7.03455	1.99905e-12	2.28212e-05	ITGB1;PIK3R1
1182	b cell survival pathway	ceRNA	FGD4	13	7	2	0.0761204	0.27349	7.03455	1.99905e-12	2.28212e-05	ITGB1;PIK3CA
1183	b cell survival pathway	ceRNA	FMR1	13	7	3	0.0761204	0.27349	10.691	1.12155e-26	1.28037e-19	PDPK1;PIK3CA;ZBTB7A
1184	b cell survival pathway	ceRNA	FOXP1	13	7	2	0.0761204	0.27349	7.03455	1.99905e-12	2.28212e-05	PIK3CA;PIK3R1
1185	b cell survival pathway	ceRNA	GMFB	13	7	2	0.0761204	0.27349	7.03455	1.99905e-12	2.28212e-05	ITGB1;PIK3CA
1186	b cell survival pathway	ceRNA	GNPDA2	13	7	2	0.0761204	0.27349	7.03455	1.99905e-12	2.28212e-05	ITGB1;PIK3CA
1187	b cell survival pathway	ceRNA	HIPK3	13	7	3	0.0761204	0.27349	10.691	1.12155e-26	1.28037e-19	ITGB1;PIK3CA;ZBTB7A
1188	b cell survival pathway	ceRNA	INO80	13	7	2	0.0761204	0.27349	7.03455	1.99905e-12	2.28212e-05	PIK3CA;ZBTB7A
1189	b cell survival pathway	ceRNA	KAT6A	13	7	2	0.0761204	0.27349	7.03455	1.99905e-12	2.28212e-05	PIK3CA;ZBTB7A
1190	b cell survival pathway	ceRNA	MIER3	13	7	2	0.0761204	0.27349	7.03455	1.99905e-12	2.28212e-05	PIK3CA;ZBTB7A
1191	b cell survival pathway	ceRNA	MITF	13	7	2	0.0761204	0.27349	7.03455	1.99905e-12	2.28212e-05	ITGB1;PIK3R1
1192	b cell survival pathway	ceRNA	MORF4L1	13	7	2	0.0761204	0.27349	7.03455	1.99905e-12	2.28212e-05	ITGB1;PIK3R1
1193	b cell survival pathway	ceRNA	MTF1	13	7	2	0.0761204	0.27349	7.03455	1.99905e-12	2.28212e-05	PIK3CA;ZBTB7A
1194	b cell survival pathway	ceRNA	NEK9	13	7	2	0.0761204	0.27349	7.03455	1.99905e-12	2.28212e-05	PIK3CA;ZBTB7A
1195	b cell survival pathway	ceRNA	NFIB	13	7	2	0.0761204	0.27349	7.03455	1.99905e-12	2.28212e-05	PIK3CA;PIK3R1
1196	b cell survival pathway	ceRNA	PDS5A	13	7	2	0.0761204	0.27349	7.03455	1.99905e-12	2.28212e-05	ITGB1;ZBTB7A
1197	b cell survival pathway	ceRNA	PEAK1	13	7	2	0.0761204	0.27349	7.03455	1.99905e-12	2.28212e-05	ITGB1;PIK3CA
1198	b cell survival pathway	ceRNA	PPM1A	13	7	2	0.0761204	0.27349	7.03455	1.99905e-12	2.28212e-05	ITGB1;PDPK1
1199	b cell survival pathway	ceRNA	PPM1B	13	7	2	0.0761204	0.27349	7.03455	1.99905e-12	2.28212e-05	ITGB1;PDPK1
1200	b cell survival pathway	ceRNA	PTEN	13	7	2	0.0761204	0.27349	7.03455	1.99905e-12	2.28212e-05	PIK3R1;ZBTB7A
1201	b cell survival pathway	ceRNA	RBM27	13	7	2	0.0761204	0.27349	7.03455	1.99905e-12	2.28212e-05	ITGB1;PDPK1
1202	b cell survival pathway	ceRNA	ROCK2	13	7	2	0.0761204	0.27349	7.03455	1.99905e-12	2.28212e-05	ITGB1;PIK3CA
1203	b cell survival pathway	ceRNA	SALL1	13	7	2	0.0761204	0.27349	7.03455	1.99905e-12	2.28212e-05	ITGB1;PIK3R1
1204	b cell survival pathway	ceRNA	SPOPL	13	7	3	0.0761204	0.27349	10.691	1.12155e-26	1.28037e-19	ITGB1;PIK3CA;ZBTB7A
1205	b cell survival pathway	ceRNA	TCF4	13	7	2	0.0761204	0.27349	7.03455	1.99905e-12	2.28212e-05	ITGB1;PIK3R1
1206	b cell survival pathway	ceRNA	TGFBR2	13	7	2	0.0761204	0.27349	7.03455	1.99905e-12	2.28212e-05	PIK3CA;PIK3R1
1207	b cell survival pathway	ceRNA	TP53INP1	13	7	2	0.0761204	0.27349	7.03455	1.99905e-12	2.28212e-05	PIK3R1;ZBTB7A
1208	b cell survival pathway	ceRNA	TSHZ3	13	7	2	0.0761204	0.27349	7.03455	1.99905e-12	2.28212e-05	ITGB1;PIK3CA
1209	b cell survival pathway	ceRNA	TXLNA	13	7	2	0.0761204	0.27349	7.03455	1.99905e-12	2.28212e-05	PIK3CA;ZBTB7A
1210	b cell survival pathway	ceRNA	YES1	13	7	2	0.0761204	0.27349	7.03455	1.99905e-12	2.28212e-05	ITGB1;PIK3R1
1211	b cell survival pathway	ceRNA	YTHDF3	13	7	2	0.0761204	0.27349	7.03455	1.99905e-12	2.28212e-05	ITGB1;PDPK1
1212	b cell survival pathway	ceRNA	ZFHX4	13	7	2	0.0761204	0.27349	7.03455	1.99905e-12	2.28212e-05	ITGB1;PIK3CA
1213	b cell survival pathway	ceRNA	ZFPM2	13	7	2	0.0761204	0.27349	7.03455	1.99905e-12	2.28212e-05	ITGB1;PIK3R1
1214	b cell survival pathway	ceRNA	ZNF292	13	7	2	0.0761204	0.27349	7.03455	1.99905e-12	2.28212e-05	ITGB1;PIK3CA
1215	bcr signaling pathway	ceRNA	AFF4	31	14	4	0.260078	0.489128	7.6461	2.07167e-14	2.36503e-07	MAP2K1;MAP3K1;PPP3CA;SOS1
1216	bcr signaling pathway	ceRNA	BACH2	31	14	4	0.260078	0.489128	7.6461	2.07167e-14	2.36503e-07	MAP3K1;PPP3CA;RAC1;SOS1
1217	bcr signaling pathway	ceRNA	C5orf24	31	14	4	0.260078	0.489128	7.6461	2.07167e-14	2.36503e-07	MAP2K1;MAP3K1;PPP3CB;SOS1
1218	bcr signaling pathway	ceRNA	CDK17	31	14	4	0.260078	0.489128	7.6461	2.07167e-14	2.36503e-07	MAP2K1;MAP3K1;MAPK14;SOS1
1219	bcr signaling pathway	ceRNA	CELF2	31	14	4	0.260078	0.489128	7.6461	2.07167e-14	2.36503e-07	MAP3K1;PPP3CA;PRKCB;SOS1
1220	bcr signaling pathway	ceRNA	CHD6	31	14	4	0.260078	0.489128	7.6461	2.07167e-14	2.36503e-07	MAP3K1;PPP3CB;RAF1;SOS1
1221	bcr signaling pathway	ceRNA	CNOT6L	31	14	4	0.260078	0.489128	7.6461	2.07167e-14	2.36503e-07	MAP2K1;MAP3K1;PPP3CA;SOS1
1222	bcr signaling pathway	ceRNA	DDX3X	31	14	4	0.260078	0.489128	7.6461	2.07167e-14	2.36503e-07	MAP3K1;PPP3CA;PPP3CB;SOS1
1223	bcr signaling pathway	ceRNA	FAM179B	31	14	4	0.260078	0.489128	7.6461	2.07167e-14	2.36503e-07	PPP3CA;PPP3CB;RAF1;SOS1
1224	bcr signaling pathway	ceRNA	FMR1	31	14	4	0.260078	0.489128	7.6461	2.07167e-14	2.36503e-07	MAP3K1;PPP3CA;PPP3CB;SOS1
1225	bcr signaling pathway	ceRNA	NOVA1	31	14	4	0.260078	0.489128	7.6461	2.07167e-14	2.36503e-07	FOS;MAP3K1;PPP3CB;PRKCB
1226	bcr signaling pathway	ceRNA	NUFIP2	31	14	4	0.260078	0.489128	7.6461	2.07167e-14	2.36503e-07	MAP3K1;PPP3CB;RAF1;SOS1
1227	bcr signaling pathway	ceRNA	TCF4	31	14	7	0.260078	0.489128	13.7795	3.38609e-43	3.86557e-36	FOS;MAP3K1;PPP3CA;PPP3CB;PRKCA;PRKCB;SOS1
1228	bcr signaling pathway	ceRNA	TNPO1	31	14	4	0.260078	0.489128	7.6461	2.07167e-14	2.36503e-07	GRB2;MAP3K1;PPP3CB;SOS1
1229	bcr signaling pathway	ceRNA	ZBTB34	31	14	4	0.260078	0.489128	7.6461	2.07167e-14	2.36503e-07	CSNK2A1;MAP3K1;PPP3CB;SOS1
1230	bcr signaling pathway	ceRNA	ZDHHC17	31	14	4	0.260078	0.489128	7.6461	2.07167e-14	2.36503e-07	MAP3K1;PPP3CA;PPP3CB;SOS1
1231	bcr signaling pathway	ceRNA	ZEB2	31	14	4	0.260078	0.489128	7.6461	2.07167e-14	2.36503e-07	MAP3K1;PPP3CB;PRKCA;PRKCB
1232	bcr signaling pathway	ceRNA	ZFPM2	31	14	4	0.260078	0.489128	7.6461	2.07167e-14	2.36503e-07	MAP3K1;PPP3CA;PRKCA;SOS1
1233	bioactive peptide induced signaling pathway	ceRNA	BNC2	33	17	4	0.228361	0.46593	8.09487	5.73255e-16	6.5443e-09	GNAI1;PIK3CA;PIK3R1;PRKCB
1234	bioactive peptide induced signaling pathway	ceRNA	C5orf24	33	17	4	0.228361	0.46593	8.09487	5.73255e-16	6.5443e-09	GNB1;MAPK1;PIK3CA;SOS1
1235	bioactive peptide induced signaling pathway	ceRNA	CDK17	33	17	4	0.228361	0.46593	8.09487	5.73255e-16	6.5443e-09	GNB1;MAPK1;MAPK14;SOS1
1236	bioactive peptide induced signaling pathway	ceRNA	CELF2	33	17	4	0.228361	0.46593	8.09487	5.73255e-16	6.5443e-09	GNAI1;PIK3R1;PRKCB;SOS1
1237	bioactive peptide induced signaling pathway	ceRNA	CPEB4	33	17	5	0.228361	0.46593	10.2411	1.29753e-24	1.48126e-17	GNB1;GRB2;MAPK1;PIK3CA;SOS1
1238	bioactive peptide induced signaling pathway	ceRNA	CREBRF	33	17	6	0.228361	0.46593	12.3874	3.05798e-35	3.491e-28	GNAI1;GNB1;JAK2;MAPK1;PIK3R1;SOS1
1239	bioactive peptide induced signaling pathway	ceRNA	EIF2C1	33	17	5	0.228361	0.46593	10.2411	1.29753e-24	1.48126e-17	CAMK2G;GNB1;MAPK1;PIK3CA;SOS1
1240	bioactive peptide induced signaling pathway	ceRNA	ELK3	33	17	4	0.228361	0.46593	8.09487	5.73255e-16	6.5443e-09	GNAI1;MAPK1;PRKCA;SOS1
1241	bioactive peptide induced signaling pathway	ceRNA	FMR1	33	17	4	0.228361	0.46593	8.09487	5.73255e-16	6.5443e-09	MAPK1;PIK3CA;SOS1;STAT5B
1242	bioactive peptide induced signaling pathway	ceRNA	FOXJ3	33	17	5	0.228361	0.46593	10.2411	1.29753e-24	1.48126e-17	CAMK2G;GNB1;MAPK1;PIK3R1;SOS1
1243	bioactive peptide induced signaling pathway	ceRNA	KLHL15	33	17	4	0.228361	0.46593	8.09487	5.73255e-16	6.5443e-09	GNB1;MAPK1;PIK3CA;SOS1
1244	bioactive peptide induced signaling pathway	ceRNA	MIER3	33	17	5	0.228361	0.46593	10.2411	1.29753e-24	1.48126e-17	GNB1;MAPK1;PIK3CA;SOS1;STAT3
1245	bioactive peptide induced signaling pathway	ceRNA	MTF1	33	17	4	0.228361	0.46593	8.09487	5.73255e-16	6.5443e-09	MAPK1;PIK3CA;SOS1;STAT3
1246	bioactive peptide induced signaling pathway	ceRNA	NFIB	33	17	5	0.228361	0.46593	10.2411	1.29753e-24	1.48126e-17	GNAI1;MYLK;PIK3CA;PIK3R1;SOS1
1247	bioactive peptide induced signaling pathway	ceRNA	PTEN	33	17	4	0.228361	0.46593	8.09487	5.73255e-16	6.5443e-09	CAMK2G;MAPK1;PIK3R1;SOS1
1248	bioactive peptide induced signaling pathway	ceRNA	QKI	33	17	4	0.228361	0.46593	8.09487	5.73255e-16	6.5443e-09	CAMK2G;MAPK1;PIK3R1;SOS1
1249	bioactive peptide induced signaling pathway	ceRNA	RLIM	33	17	4	0.228361	0.46593	8.09487	5.73255e-16	6.5443e-09	GNB1;MAPK1;SOS1;STAT3
1250	bioactive peptide induced signaling pathway	ceRNA	RORA	33	17	4	0.228361	0.46593	8.09487	5.73255e-16	6.5443e-09	CAMK2G;GNAI1;MYLK;SOS1
1251	bioactive peptide induced signaling pathway	ceRNA	TCF4	33	17	8	0.228361	0.46593	16.6799	1.83526e-62	2.09514e-55	GNAI1;GNB1;JAK2;MAPK1;PIK3R1;PRKCA;PRKCB;SOS1
1252	bioactive peptide induced signaling pathway	ceRNA	TGFBR2	33	17	4	0.228361	0.46593	8.09487	5.73255e-16	6.5443e-09	GNAI1;MAPK1;PIK3CA;PIK3R1
1253	bioactive peptide induced signaling pathway	ceRNA	TNPO1	33	17	4	0.228361	0.46593	8.09487	5.73255e-16	6.5443e-09	GNB1;GRB2;MAPK1;SOS1
1254	bioactive peptide induced signaling pathway	ceRNA	ZEB2	33	17	5	0.228361	0.46593	10.2411	1.29753e-24	1.48126e-17	GNAI1;GNB1;MAPK1;PRKCA;PRKCB
1255	bioactive peptide induced signaling pathway	ceRNA	ZFPM2	33	17	5	0.228361	0.46593	10.2411	1.29753e-24	1.48126e-17	GNAI1;GNB1;PIK3R1;PRKCA;SOS1
1256	bioactive peptide induced signaling pathway	ceRNA	ZNF148	33	17	4	0.228361	0.46593	8.09487	5.73255e-16	6.5443e-09	GNB1;MAPK1;SOS1;STAT3
1257	bone remodeling	ceRNA	DYRK2	16	7	2	0.0396972	0.19792	9.9045	3.97956e-23	4.54308e-16	CHUK;TNFSF11
1258	bone remodeling	ceRNA	FOXA1	16	7	2	0.0396972	0.19792	9.9045	3.97956e-23	4.54308e-16	IRF9;TNFSF11
1259	bone remodeling	ceRNA	KLF6	16	7	2	0.0396972	0.19792	9.9045	3.97956e-23	4.54308e-16	FOS;TNFSF11
1260	bone remodeling	ceRNA	SYNCRIP	16	7	2	0.0396972	0.19792	9.9045	3.97956e-23	4.54308e-16	CHUK;TNFSF11
1261	bone remodeling	ceRNA	TCF4	16	7	2	0.0396972	0.19792	9.9045	3.97956e-23	4.54308e-16	FOS;TNFSF11
1262	bone remodeling	ceRNA	ZEB1	16	7	3	0.0396972	0.19792	14.957	1.40205e-50	1.60058e-43	CHUK;FOS;TNFSF11
1263	bone remodeling	ceRNA	ZFHX4	16	7	2	0.0396972	0.19792	9.9045	3.97956e-23	4.54308e-16	FOS;TNFSF11
1264	btg family proteins and cell cycle regulation	ceRNA	ATL2	9	6	2	0.0499283	0.221609	8.7996	1.37305e-18	1.56748e-11	CCND1;RB1
1265	btg family proteins and cell cycle regulation	ceRNA	AURKB	9	6	2	0.0499283	0.221609	8.7996	1.37305e-18	1.56748e-11	CCND1;RB1
1266	btg family proteins and cell cycle regulation	ceRNA	BCL11A	9	6	2	0.0499283	0.221609	8.7996	1.37305e-18	1.56748e-11	BTG2;CCND1
1267	btg family proteins and cell cycle regulation	ceRNA	BTBD7	9	6	2	0.0499283	0.221609	8.7996	1.37305e-18	1.56748e-11	BTG2;RB1
1268	btg family proteins and cell cycle regulation	ceRNA	BZW1	9	6	2	0.0499283	0.221609	8.7996	1.37305e-18	1.56748e-11	CCND1;RB1
1269	btg family proteins and cell cycle regulation	ceRNA	CDC25A	9	6	4	0.0499283	0.221609	17.8245	4.56151e-71	5.20743e-64	CCND1;CHAF1A;RB1;TP53
1270	btg family proteins and cell cycle regulation	ceRNA	CDK17	9	6	2	0.0499283	0.221609	8.7996	1.37305e-18	1.56748e-11	BTG2;CCND1
1271	btg family proteins and cell cycle regulation	ceRNA	CHIC1	9	6	2	0.0499283	0.221609	8.7996	1.37305e-18	1.56748e-11	BTG2;CCND1
1272	btg family proteins and cell cycle regulation	ceRNA	CPEB2	9	6	2	0.0499283	0.221609	8.7996	1.37305e-18	1.56748e-11	BTG2;CCND1
1273	btg family proteins and cell cycle regulation	ceRNA	CPEB3	9	6	3	0.0499283	0.221609	13.3121	1.96869e-40	2.24746e-33	BTG2;CCND1;RB1
1274	btg family proteins and cell cycle regulation	ceRNA	CPEB4	9	6	2	0.0499283	0.221609	8.7996	1.37305e-18	1.56748e-11	BTG2;CCND1
1275	btg family proteins and cell cycle regulation	ceRNA	FNDC3A	9	6	2	0.0499283	0.221609	8.7996	1.37305e-18	1.56748e-11	CCND1;RB1
1276	btg family proteins and cell cycle regulation	ceRNA	FRS2	9	6	3	0.0499283	0.221609	13.3121	1.96869e-40	2.24746e-33	BTG2;CCND1;RB1
1277	btg family proteins and cell cycle regulation	ceRNA	KIAA0494	9	6	2	0.0499283	0.221609	8.7996	1.37305e-18	1.56748e-11	CCND1;RB1
1278	btg family proteins and cell cycle regulation	ceRNA	LCOR	9	6	2	0.0499283	0.221609	8.7996	1.37305e-18	1.56748e-11	CCND1;RB1
1279	btg family proteins and cell cycle regulation	ceRNA	LRIG1	9	6	3	0.0499283	0.221609	13.3121	1.96869e-40	2.24746e-33	BTG2;CCND1;RB1
1280	btg family proteins and cell cycle regulation	ceRNA	MAP3K1	9	6	2	0.0499283	0.221609	8.7996	1.37305e-18	1.56748e-11	CCND1;RB1
1281	btg family proteins and cell cycle regulation	ceRNA	MIER3	9	6	2	0.0499283	0.221609	8.7996	1.37305e-18	1.56748e-11	BTG2;RB1
1282	btg family proteins and cell cycle regulation	ceRNA	NBEA	9	6	2	0.0499283	0.221609	8.7996	1.37305e-18	1.56748e-11	BTG2;RB1
1283	btg family proteins and cell cycle regulation	ceRNA	PURA	9	6	2	0.0499283	0.221609	8.7996	1.37305e-18	1.56748e-11	BTG2;RB1
1284	btg family proteins and cell cycle regulation	ceRNA	SLC4A7	9	6	3	0.0499283	0.221609	13.3121	1.96869e-40	2.24746e-33	BTG2;CCND1;RB1
1285	btg family proteins and cell cycle regulation	ceRNA	TBC1D9	9	6	2	0.0499283	0.221609	8.7996	1.37305e-18	1.56748e-11	CCND1;RB1
1286	btg family proteins and cell cycle regulation	ceRNA	WDFY3	9	6	3	0.0499283	0.221609	13.3121	1.96869e-40	2.24746e-33	BTG2;CCND1;RB1
1287	btg family proteins and cell cycle regulation	ceRNA	YPEL2	9	6	2	0.0499283	0.221609	8.7996	1.37305e-18	1.56748e-11	CCND1;RB1
1288	btg family proteins and cell cycle regulation	ceRNA	ZNF367	9	6	2	0.0499283	0.221609	8.7996	1.37305e-18	1.56748e-11	CCND1;CHAF1A
1289	cadmium induces dna synthesis and proliferation in macrophages	ceRNA	CDK17	16	8	3	0.116636	0.334852	8.61086	7.25145e-18	8.27828e-11	MAP2K1;MAPK1;PLCB1
1290	cadmium induces dna synthesis and proliferation in macrophages	ceRNA	ELK3	16	8	3	0.116636	0.334852	8.61086	7.25145e-18	8.27828e-11	MAPK1;PLCB1;PRKCA
1291	cadmium induces dna synthesis and proliferation in macrophages	ceRNA	KIF23	16	8	3	0.116636	0.334852	8.61086	7.25145e-18	8.27828e-11	MAP2K1;PLCB1;RAF1
1292	cadmium induces dna synthesis and proliferation in macrophages	ceRNA	NOVA1	16	8	3	0.116636	0.334852	8.61086	7.25145e-18	8.27828e-11	FOS;PLCB1;PRKCB
1293	cadmium induces dna synthesis and proliferation in macrophages	ceRNA	TACC1	16	8	3	0.116636	0.334852	8.61086	7.25145e-18	8.27828e-11	MAP2K1;MAPK1;PLCB1
1294	cadmium induces dna synthesis and proliferation in macrophages	ceRNA	TAF5	16	8	3	0.116636	0.334852	8.61086	7.25145e-18	8.27828e-11	MAP2K1;PLCB1;RAF1
1295	cadmium induces dna synthesis and proliferation in macrophages	ceRNA	TCF4	16	8	5	0.116636	0.334852	14.5836	3.57174e-48	4.07751e-41	FOS;MAPK1;PLCB1;PRKCA;PRKCB
1296	cadmium induces dna synthesis and proliferation in macrophages	ceRNA	ZEB1	16	8	4	0.116636	0.334852	11.5973	4.25285e-31	4.85507e-24	FOS;MAPK1;PLCB1;PRKCA
1297	cadmium induces dna synthesis and proliferation in macrophages	ceRNA	ZEB2	16	8	4	0.116636	0.334852	11.5973	4.25285e-31	4.85507e-24	MAPK1;PLCB1;PRKCA;PRKCB
1298	carm1 and regulation of the estrogen receptor	ceRNA	ARHGAP5	12	9	3	0.213833	0.450843	6.1799	6.41422e-10	0.00732249	CREBBP;EP300;NR3C1
1299	carm1 and regulation of the estrogen receptor	ceRNA	ARID4A	12	9	4	0.213833	0.450843	8.39797	4.54263e-17	5.18588e-10	CREBBP;EP300;MEF2C;NR3C1
1300	carm1 and regulation of the estrogen receptor	ceRNA	ATP2A2	12	9	3	0.213833	0.450843	6.1799	6.41422e-10	0.00732249	CREBBP;EP300;MEF2C
1301	carm1 and regulation of the estrogen receptor	ceRNA	ATP2B1	12	9	3	0.213833	0.450843	6.1799	6.41422e-10	0.00732249	CREBBP;EP300;NR3C1
1302	carm1 and regulation of the estrogen receptor	ceRNA	BCL11A	12	9	3	0.213833	0.450843	6.1799	6.41422e-10	0.00732249	ESR1;MEF2C;NR3C1
1303	carm1 and regulation of the estrogen receptor	ceRNA	CDK17	12	9	5	0.213833	0.450843	10.616	2.51091e-26	2.86646e-19	CREBBP;EP300;ESR1;MEF2C;NR3C1
1304	carm1 and regulation of the estrogen receptor	ceRNA	CELF2	12	9	3	0.213833	0.450843	6.1799	6.41422e-10	0.00732249	CREBBP;EP300;NR3C1
1305	carm1 and regulation of the estrogen receptor	ceRNA	CHD2	12	9	3	0.213833	0.450843	6.1799	6.41422e-10	0.00732249	CREBBP;EP300;NR3C1
1306	carm1 and regulation of the estrogen receptor	ceRNA	CHD9	12	9	3	0.213833	0.450843	6.1799	6.41422e-10	0.00732249	EP300;MEF2C;NR3C1
1307	carm1 and regulation of the estrogen receptor	ceRNA	CLASP2	12	9	3	0.213833	0.450843	6.1799	6.41422e-10	0.00732249	CREBBP;EP300;MEF2C
1308	carm1 and regulation of the estrogen receptor	ceRNA	CPEB3	12	9	3	0.213833	0.450843	6.1799	6.41422e-10	0.00732249	CREBBP;MEF2C;NR3C1
1309	carm1 and regulation of the estrogen receptor	ceRNA	CREBRF	12	9	4	0.213833	0.450843	8.39797	4.54263e-17	5.18588e-10	CREBBP;EP300;MEF2C;NR3C1
1310	carm1 and regulation of the estrogen receptor	ceRNA	CTDSPL2	12	9	4	0.213833	0.450843	8.39797	4.54263e-17	5.18588e-10	CREBBP;EP300;MEF2C;NR3C1
1311	carm1 and regulation of the estrogen receptor	ceRNA	DIP2C	12	9	3	0.213833	0.450843	6.1799	6.41422e-10	0.00732249	CREBBP;EP300;NR3C1
1312	carm1 and regulation of the estrogen receptor	ceRNA	ELK3	12	9	3	0.213833	0.450843	6.1799	6.41422e-10	0.00732249	CREBBP;EP300;MEF2C
1313	carm1 and regulation of the estrogen receptor	ceRNA	FMR1	12	9	3	0.213833	0.450843	6.1799	6.41422e-10	0.00732249	CREBBP;EP300;NR3C1
1314	carm1 and regulation of the estrogen receptor	ceRNA	FOXO1	12	9	3	0.213833	0.450843	6.1799	6.41422e-10	0.00732249	CREBBP;MEF2C;NR3C1
1315	carm1 and regulation of the estrogen receptor	ceRNA	GSK3B	12	9	3	0.213833	0.450843	6.1799	6.41422e-10	0.00732249	CREBBP;EP300;GRIP1
1316	carm1 and regulation of the estrogen receptor	ceRNA	HCFC2	12	9	3	0.213833	0.450843	6.1799	6.41422e-10	0.00732249	CREBBP;MEF2C;NR3C1
1317	carm1 and regulation of the estrogen receptor	ceRNA	HDAC9	12	9	3	0.213833	0.450843	6.1799	6.41422e-10	0.00732249	EP300;MEF2C;NR3C1
1318	carm1 and regulation of the estrogen receptor	ceRNA	HIVEP2	12	9	3	0.213833	0.450843	6.1799	6.41422e-10	0.00732249	CREBBP;EP300;NR3C1
1319	carm1 and regulation of the estrogen receptor	ceRNA	INO80D	12	9	3	0.213833	0.450843	6.1799	6.41422e-10	0.00732249	CREBBP;EP300;NR3C1
1320	carm1 and regulation of the estrogen receptor	ceRNA	KHSRP	12	9	3	0.213833	0.450843	6.1799	6.41422e-10	0.00732249	CREBBP;EP300;GRIP1
1321	carm1 and regulation of the estrogen receptor	ceRNA	KPNA4	12	9	3	0.213833	0.450843	6.1799	6.41422e-10	0.00732249	CREBBP;GRIP1;MEF2C
1322	carm1 and regulation of the estrogen receptor	ceRNA	LCOR	12	9	3	0.213833	0.450843	6.1799	6.41422e-10	0.00732249	CREBBP;MEF2C;NR3C1
1323	carm1 and regulation of the estrogen receptor	ceRNA	LCORL	12	9	4	0.213833	0.450843	8.39797	4.54263e-17	5.18588e-10	CREBBP;EP300;MEF2C;NR3C1
1324	carm1 and regulation of the estrogen receptor	ceRNA	LIN54	12	9	3	0.213833	0.450843	6.1799	6.41422e-10	0.00732249	CREBBP;EP300;NR3C1
1325	carm1 and regulation of the estrogen receptor	ceRNA	MAGI1	12	9	3	0.213833	0.450843	6.1799	6.41422e-10	0.00732249	CREBBP;MEF2C;NR3C1
1326	carm1 and regulation of the estrogen receptor	ceRNA	MED13	12	9	3	0.213833	0.450843	6.1799	6.41422e-10	0.00732249	EP300;MEF2C;NR3C1
1327	carm1 and regulation of the estrogen receptor	ceRNA	MIER3	12	9	3	0.213833	0.450843	6.1799	6.41422e-10	0.00732249	EP300;ESR1;NR3C1
1328	carm1 and regulation of the estrogen receptor	ceRNA	MLL3	12	9	3	0.213833	0.450843	6.1799	6.41422e-10	0.00732249	CREBBP;EP300;NR3C1
1329	carm1 and regulation of the estrogen receptor	ceRNA	NFIB	12	9	3	0.213833	0.450843	6.1799	6.41422e-10	0.00732249	ESR1;MEF2C;NR3C1
1330	carm1 and regulation of the estrogen receptor	ceRNA	OTUD4	12	9	3	0.213833	0.450843	6.1799	6.41422e-10	0.00732249	CREBBP;EP300;NR3C1
1331	carm1 and regulation of the estrogen receptor	ceRNA	PDS5B	12	9	4	0.213833	0.450843	8.39797	4.54263e-17	5.18588e-10	CREBBP;EP300;GTF2A1;NR3C1
1332	carm1 and regulation of the estrogen receptor	ceRNA	PLAG1	12	9	3	0.213833	0.450843	6.1799	6.41422e-10	0.00732249	CREBBP;MEF2C;NR3C1
1333	carm1 and regulation of the estrogen receptor	ceRNA	PPP6C	12	9	3	0.213833	0.450843	6.1799	6.41422e-10	0.00732249	CREBBP;EP300;NR3C1
1334	carm1 and regulation of the estrogen receptor	ceRNA	PTEN	12	9	3	0.213833	0.450843	6.1799	6.41422e-10	0.00732249	CREBBP;EP300;NR3C1
1335	carm1 and regulation of the estrogen receptor	ceRNA	RBM27	12	9	3	0.213833	0.450843	6.1799	6.41422e-10	0.00732249	CREBBP;EP300;NR3C1
1336	carm1 and regulation of the estrogen receptor	ceRNA	REV3L	12	9	3	0.213833	0.450843	6.1799	6.41422e-10	0.00732249	EP300;MEF2C;NR3C1
1337	carm1 and regulation of the estrogen receptor	ceRNA	RNF38	12	9	3	0.213833	0.450843	6.1799	6.41422e-10	0.00732249	CREBBP;MEF2C;NR3C1
1338	carm1 and regulation of the estrogen receptor	ceRNA	SCN2A	12	9	3	0.213833	0.450843	6.1799	6.41422e-10	0.00732249	EP300;MEF2C;NR3C1
1339	carm1 and regulation of the estrogen receptor	ceRNA	SP4	12	9	3	0.213833	0.450843	6.1799	6.41422e-10	0.00732249	CREBBP;MEF2C;NR3C1
1340	carm1 and regulation of the estrogen receptor	ceRNA	SYNCRIP	12	9	5	0.213833	0.450843	10.616	2.51091e-26	2.86646e-19	CREBBP;EP300;GRIP1;MEF2C;NR3C1
1341	carm1 and regulation of the estrogen receptor	ceRNA	TCF4	12	9	5	0.213833	0.450843	10.616	2.51091e-26	2.86646e-19	CREBBP;EP300;ESR1;MEF2C;NR3C1
1342	carm1 and regulation of the estrogen receptor	ceRNA	TET2	12	9	4	0.213833	0.450843	8.39797	4.54263e-17	5.18588e-10	CREBBP;EP300;GRIP1;MEF2C
1343	carm1 and regulation of the estrogen receptor	ceRNA	TRAPPC8	12	9	3	0.213833	0.450843	6.1799	6.41422e-10	0.00732249	CREBBP;EP300;NR3C1
1344	carm1 and regulation of the estrogen receptor	ceRNA	YTHDF3	12	9	4	0.213833	0.450843	8.39797	4.54263e-17	5.18588e-10	CREBBP;EP300;MEF2C;NR3C1
1345	carm1 and regulation of the estrogen receptor	ceRNA	ZBTB34	12	9	3	0.213833	0.450843	6.1799	6.41422e-10	0.00732249	CREBBP;EP300;NR3C1
1346	carm1 and regulation of the estrogen receptor	ceRNA	ZFHX4	12	9	3	0.213833	0.450843	6.1799	6.41422e-10	0.00732249	CREBBP;MEF2C;NR3C1
1347	carm1 and regulation of the estrogen receptor	ceRNA	ZFX	12	9	4	0.213833	0.450843	8.39797	4.54263e-17	5.18588e-10	CREBBP;EP300;GRIP1;NR3C1
1348	ccr3 signaling in eosinophils	ceRNA	C5orf24	23	13	5	0.223655	0.462857	10.3193	5.76419e-25	6.58042e-18	GNB1;MAP2K1;MAPK1;RHOA;ROCK2
1349	ccr3 signaling in eosinophils	ceRNA	CDK17	23	13	4	0.223655	0.462857	8.15877	3.38453e-16	3.86379e-09	GNB1;MAP2K1;MAPK1;PLCB1
1350	ccr3 signaling in eosinophils	ceRNA	CREBRF	23	13	4	0.223655	0.462857	8.15877	3.38453e-16	3.86379e-09	GNB1;MAPK1;RAF1;ROCK2
1351	ccr3 signaling in eosinophils	ceRNA	ELK3	23	13	4	0.223655	0.462857	8.15877	3.38453e-16	3.86379e-09	MAPK1;PLCB1;PRKCA;ROCK2
1352	ccr3 signaling in eosinophils	ceRNA	LCOR	23	13	5	0.223655	0.462857	10.3193	5.76419e-25	6.58042e-18	GNB1;MAPK1;PLCB1;RHOA;ROCK2
1353	ccr3 signaling in eosinophils	ceRNA	MIER3	23	13	4	0.223655	0.462857	8.15877	3.38453e-16	3.86379e-09	GNB1;MAPK1;PTK2;ROCK2
1354	ccr3 signaling in eosinophils	ceRNA	NRP2	23	13	4	0.223655	0.462857	8.15877	3.38453e-16	3.86379e-09	GNB1;LIMK1;PLCB1;ROCK2
1355	ccr3 signaling in eosinophils	ceRNA	TBC1D9	23	13	4	0.223655	0.462857	8.15877	3.38453e-16	3.86379e-09	LIMK1;MAP2K1;PLCB1;ROCK2
1356	ccr3 signaling in eosinophils	ceRNA	TCF4	23	13	8	0.223655	0.462857	16.8007	2.41181e-63	2.75333e-56	GNB1;MAPK1;PLCB1;PRKCA;PRKCB;PTK2;RHOA;ROCK2
1357	ccr3 signaling in eosinophils	ceRNA	VEZF1	23	13	4	0.223655	0.462857	8.15877	3.38453e-16	3.86379e-09	PLCB1;PTK2;RHOA;ROCK2
1358	ccr3 signaling in eosinophils	ceRNA	ZEB1	23	13	5	0.223655	0.462857	10.3193	5.76419e-25	6.58042e-18	MAPK1;PLCB1;PRKCA;RHOA;ROCK2
1359	ccr3 signaling in eosinophils	ceRNA	ZEB2	23	13	5	0.223655	0.462857	10.3193	5.76419e-25	6.58042e-18	GNB1;MAPK1;PLCB1;PRKCA;PRKCB
1360	ccr3 signaling in eosinophils	ceRNA	ZFPM2	23	13	4	0.223655	0.462857	8.15877	3.38453e-16	3.86379e-09	GNB1;PLCB1;PRKCA;ROCK2
1361	cdc25 and chk1 regulatory pathway in response to dna damage	ceRNA	CDC25A	7	6	2	0.090444	0.288187	6.62611	3.44648e-11	0.000393451	CHEK1;WEE1
1362	cdc25 and chk1 regulatory pathway in response to dna damage	ceRNA	KIF23	7	6	2	0.090444	0.288187	6.62611	3.44648e-11	0.000393451	CHEK1;WEE1
1363	cdc25 and chk1 regulatory pathway in response to dna damage	ceRNA	TBL1XR1	7	6	2	0.090444	0.288187	6.62611	3.44648e-11	0.000393451	WEE1;YWHAH
1364	cdc25 and chk1 regulatory pathway in response to dna damage	ceRNA	USP32	7	6	2	0.090444	0.288187	6.62611	3.44648e-11	0.000393451	MYT1;WEE1
1365	cdk regulation of dna replication	ceRNA	ACTL6A	18	6	1	0.0220994	0.148324	6.59301	4.30998e-11	0.000492029	CDK2
1366	cdk regulation of dna replication	ceRNA	ANKRD13C	18	6	1	0.0220994	0.148324	6.59301	4.30998e-11	0.000492029	CDK2
1367	cdk regulation of dna replication	ceRNA	ANKRD52	18	6	1	0.0220994	0.148324	6.59301	4.30998e-11	0.000492029	CCNE1
1368	cdk regulation of dna replication	ceRNA	ANLN	18	6	1	0.0220994	0.148324	6.59301	4.30998e-11	0.000492029	CCNE1
1369	cdk regulation of dna replication	ceRNA	ATAD2	18	6	1	0.0220994	0.148324	6.59301	4.30998e-11	0.000492029	CDK2
1370	cdk regulation of dna replication	ceRNA	ATAD2B	18	6	1	0.0220994	0.148324	6.59301	4.30998e-11	0.000492029	CDK2
1371	cdk regulation of dna replication	ceRNA	ATF1	18	6	1	0.0220994	0.148324	6.59301	4.30998e-11	0.000492029	ORC2
1372	cdk regulation of dna replication	ceRNA	ATRX	18	6	1	0.0220994	0.148324	6.59301	4.30998e-11	0.000492029	KITLG
1373	cdk regulation of dna replication	ceRNA	BAZ2A	18	6	1	0.0220994	0.148324	6.59301	4.30998e-11	0.000492029	CDKN1B
1374	cdk regulation of dna replication	ceRNA	BCL11A	18	6	1	0.0220994	0.148324	6.59301	4.30998e-11	0.000492029	CDKN1B
1375	cdk regulation of dna replication	ceRNA	CALU	18	6	1	0.0220994	0.148324	6.59301	4.30998e-11	0.000492029	CCNE1
1376	cdk regulation of dna replication	ceRNA	CAPN6	18	6	1	0.0220994	0.148324	6.59301	4.30998e-11	0.000492029	CCNE1
1377	cdk regulation of dna replication	ceRNA	CCNJ	18	6	1	0.0220994	0.148324	6.59301	4.30998e-11	0.000492029	CCNE1
1378	cdk regulation of dna replication	ceRNA	CDK17	18	6	1	0.0220994	0.148324	6.59301	4.30998e-11	0.000492029	CDKN1B
1379	cdk regulation of dna replication	ceRNA	CDV3	18	6	1	0.0220994	0.148324	6.59301	4.30998e-11	0.000492029	CDK2
1380	cdk regulation of dna replication	ceRNA	CHAF1A	18	6	1	0.0220994	0.148324	6.59301	4.30998e-11	0.000492029	CDK2
1381	cdk regulation of dna replication	ceRNA	CHEK1	18	6	1	0.0220994	0.148324	6.59301	4.30998e-11	0.000492029	CCNE1
1382	cdk regulation of dna replication	ceRNA	CIT	18	6	1	0.0220994	0.148324	6.59301	4.30998e-11	0.000492029	CDK2
1383	cdk regulation of dna replication	ceRNA	CNOT6	18	6	1	0.0220994	0.148324	6.59301	4.30998e-11	0.000492029	CDK2
1384	cdk regulation of dna replication	ceRNA	CPEB2	18	6	1	0.0220994	0.148324	6.59301	4.30998e-11	0.000492029	KITLG
1385	cdk regulation of dna replication	ceRNA	CPEB4	18	6	1	0.0220994	0.148324	6.59301	4.30998e-11	0.000492029	CDKN1B
1386	cdk regulation of dna replication	ceRNA	DCUN1D1	18	6	1	0.0220994	0.148324	6.59301	4.30998e-11	0.000492029	CDK2
1387	cdk regulation of dna replication	ceRNA	DDX46	18	6	1	0.0220994	0.148324	6.59301	4.30998e-11	0.000492029	ORC2
1388	cdk regulation of dna replication	ceRNA	DENND1B	18	6	1	0.0220994	0.148324	6.59301	4.30998e-11	0.000492029	ORC2
1389	cdk regulation of dna replication	ceRNA	E2F7	18	6	2	0.0220994	0.148324	13.335	1.44855e-40	1.65367e-33	CCNE1;CDK2
1390	cdk regulation of dna replication	ceRNA	EDC3	18	6	1	0.0220994	0.148324	6.59301	4.30998e-11	0.000492029	ORC2
1391	cdk regulation of dna replication	ceRNA	EIF2C4	18	6	1	0.0220994	0.148324	6.59301	4.30998e-11	0.000492029	CDKN1B
1392	cdk regulation of dna replication	ceRNA	ELAVL2	18	6	1	0.0220994	0.148324	6.59301	4.30998e-11	0.000492029	KITLG
1393	cdk regulation of dna replication	ceRNA	EPHB3	18	6	1	0.0220994	0.148324	6.59301	4.30998e-11	0.000492029	CCNE1
1394	cdk regulation of dna replication	ceRNA	FAF2	18	6	1	0.0220994	0.148324	6.59301	4.30998e-11	0.000492029	ORC2
1395	cdk regulation of dna replication	ceRNA	FAM175B	18	6	1	0.0220994	0.148324	6.59301	4.30998e-11	0.000492029	CDK2
1396	cdk regulation of dna replication	ceRNA	FBXL17	18	6	1	0.0220994	0.148324	6.59301	4.30998e-11	0.000492029	ORC2
1397	cdk regulation of dna replication	ceRNA	FBXO28	18	6	1	0.0220994	0.148324	6.59301	4.30998e-11	0.000492029	ORC2
1398	cdk regulation of dna replication	ceRNA	FLRT3	18	6	1	0.0220994	0.148324	6.59301	4.30998e-11	0.000492029	KITLG
1399	cdk regulation of dna replication	ceRNA	FMR1	18	6	1	0.0220994	0.148324	6.59301	4.30998e-11	0.000492029	CDK2
1400	cdk regulation of dna replication	ceRNA	FOXA1	18	6	1	0.0220994	0.148324	6.59301	4.30998e-11	0.000492029	KITLG
1401	cdk regulation of dna replication	ceRNA	FRS2	18	6	1	0.0220994	0.148324	6.59301	4.30998e-11	0.000492029	CDKN1B
1402	cdk regulation of dna replication	ceRNA	GABPB1	18	6	1	0.0220994	0.148324	6.59301	4.30998e-11	0.000492029	CDK2
1403	cdk regulation of dna replication	ceRNA	GCFC1	18	6	1	0.0220994	0.148324	6.59301	4.30998e-11	0.000492029	ORC2
1404	cdk regulation of dna replication	ceRNA	GLUD2	18	6	1	0.0220994	0.148324	6.59301	4.30998e-11	0.000492029	ORC2
1405	cdk regulation of dna replication	ceRNA	GPATCH8	18	6	1	0.0220994	0.148324	6.59301	4.30998e-11	0.000492029	CDKN1B
1406	cdk regulation of dna replication	ceRNA	HNRNPH2	18	6	1	0.0220994	0.148324	6.59301	4.30998e-11	0.000492029	KITLG
1407	cdk regulation of dna replication	ceRNA	HNRNPK	18	6	1	0.0220994	0.148324	6.59301	4.30998e-11	0.000492029	CDKN1B
1408	cdk regulation of dna replication	ceRNA	IDE	18	6	1	0.0220994	0.148324	6.59301	4.30998e-11	0.000492029	ORC2
1409	cdk regulation of dna replication	ceRNA	IGF2BP3	18	6	1	0.0220994	0.148324	6.59301	4.30998e-11	0.000492029	KITLG
1410	cdk regulation of dna replication	ceRNA	KDM3A	18	6	1	0.0220994	0.148324	6.59301	4.30998e-11	0.000492029	ORC2
1411	cdk regulation of dna replication	ceRNA	KIAA1033	18	6	1	0.0220994	0.148324	6.59301	4.30998e-11	0.000492029	ORC2
1412	cdk regulation of dna replication	ceRNA	KIAA1715	18	6	1	0.0220994	0.148324	6.59301	4.30998e-11	0.000492029	ORC2
1413	cdk regulation of dna replication	ceRNA	KIF23	18	6	1	0.0220994	0.148324	6.59301	4.30998e-11	0.000492029	CCNE1
1414	cdk regulation of dna replication	ceRNA	KLF3	18	6	1	0.0220994	0.148324	6.59301	4.30998e-11	0.000492029	CDK2
1415	cdk regulation of dna replication	ceRNA	LARP1	18	6	1	0.0220994	0.148324	6.59301	4.30998e-11	0.000492029	ORC2
1416	cdk regulation of dna replication	ceRNA	METAP2	18	6	1	0.0220994	0.148324	6.59301	4.30998e-11	0.000492029	ORC2
1417	cdk regulation of dna replication	ceRNA	MFSD11	18	6	1	0.0220994	0.148324	6.59301	4.30998e-11	0.000492029	ORC2
1418	cdk regulation of dna replication	ceRNA	MIER3	18	6	1	0.0220994	0.148324	6.59301	4.30998e-11	0.000492029	KITLG
1419	cdk regulation of dna replication	ceRNA	MOB3B	18	6	1	0.0220994	0.148324	6.59301	4.30998e-11	0.000492029	CCNE1
1420	cdk regulation of dna replication	ceRNA	NOVA1	18	6	1	0.0220994	0.148324	6.59301	4.30998e-11	0.000492029	CDKN1B
1421	cdk regulation of dna replication	ceRNA	NR2E1	18	6	1	0.0220994	0.148324	6.59301	4.30998e-11	0.000492029	CCNE1
1422	cdk regulation of dna replication	ceRNA	NRIP1	18	6	1	0.0220994	0.148324	6.59301	4.30998e-11	0.000492029	CDKN1B
1423	cdk regulation of dna replication	ceRNA	NUCKS1	18	6	1	0.0220994	0.148324	6.59301	4.30998e-11	0.000492029	CDKN1B
1424	cdk regulation of dna replication	ceRNA	NUFIP2	18	6	1	0.0220994	0.148324	6.59301	4.30998e-11	0.000492029	CDKN1B
1425	cdk regulation of dna replication	ceRNA	OTX1	18	6	1	0.0220994	0.148324	6.59301	4.30998e-11	0.000492029	CCNE1
1426	cdk regulation of dna replication	ceRNA	PDIA6	18	6	1	0.0220994	0.148324	6.59301	4.30998e-11	0.000492029	CCNE1
1427	cdk regulation of dna replication	ceRNA	PDIK1L	18	6	2	0.0220994	0.148324	13.335	1.44855e-40	1.65367e-33	CDK2;CDKN1B
1428	cdk regulation of dna replication	ceRNA	PHF6	18	6	1	0.0220994	0.148324	6.59301	4.30998e-11	0.000492029	CDK2
1429	cdk regulation of dna replication	ceRNA	PJA2	18	6	1	0.0220994	0.148324	6.59301	4.30998e-11	0.000492029	KITLG
1430	cdk regulation of dna replication	ceRNA	PRPF40A	18	6	1	0.0220994	0.148324	6.59301	4.30998e-11	0.000492029	ORC2
1431	cdk regulation of dna replication	ceRNA	PTEN	18	6	1	0.0220994	0.148324	6.59301	4.30998e-11	0.000492029	KITLG
1432	cdk regulation of dna replication	ceRNA	PTGES3	18	6	1	0.0220994	0.148324	6.59301	4.30998e-11	0.000492029	KITLG
1433	cdk regulation of dna replication	ceRNA	QSER1	18	6	1	0.0220994	0.148324	6.59301	4.30998e-11	0.000492029	CDK2
1434	cdk regulation of dna replication	ceRNA	R3HDM1	18	6	1	0.0220994	0.148324	6.59301	4.30998e-11	0.000492029	CDK2
1435	cdk regulation of dna replication	ceRNA	RACGAP1	18	6	1	0.0220994	0.148324	6.59301	4.30998e-11	0.000492029	CDK2
1436	cdk regulation of dna replication	ceRNA	RBBP6	18	6	1	0.0220994	0.148324	6.59301	4.30998e-11	0.000492029	CDK2
1437	cdk regulation of dna replication	ceRNA	RBM15	18	6	1	0.0220994	0.148324	6.59301	4.30998e-11	0.000492029	ORC2
1438	cdk regulation of dna replication	ceRNA	RFX7	18	6	1	0.0220994	0.148324	6.59301	4.30998e-11	0.000492029	CDKN1B
1439	cdk regulation of dna replication	ceRNA	RHOBTB1	18	6	1	0.0220994	0.148324	6.59301	4.30998e-11	0.000492029	KITLG
1440	cdk regulation of dna replication	ceRNA	RSBN1L	18	6	1	0.0220994	0.148324	6.59301	4.30998e-11	0.000492029	ORC5
1441	cdk regulation of dna replication	ceRNA	RSRC2	18	6	1	0.0220994	0.148324	6.59301	4.30998e-11	0.000492029	CDK2
1442	cdk regulation of dna replication	ceRNA	SERBP1	18	6	1	0.0220994	0.148324	6.59301	4.30998e-11	0.000492029	CCNE1
1443	cdk regulation of dna replication	ceRNA	SETD1B	18	6	1	0.0220994	0.148324	6.59301	4.30998e-11	0.000492029	ORC2
1444	cdk regulation of dna replication	ceRNA	SIRT1	18	6	1	0.0220994	0.148324	6.59301	4.30998e-11	0.000492029	CDKN1B
1445	cdk regulation of dna replication	ceRNA	SON	18	6	1	0.0220994	0.148324	6.59301	4.30998e-11	0.000492029	KITLG
1446	cdk regulation of dna replication	ceRNA	SPIN1	18	6	1	0.0220994	0.148324	6.59301	4.30998e-11	0.000492029	CDKN1B
1447	cdk regulation of dna replication	ceRNA	SPRYD3	18	6	1	0.0220994	0.148324	6.59301	4.30998e-11	0.000492029	CCNE1
1448	cdk regulation of dna replication	ceRNA	SRSF10	18	6	1	0.0220994	0.148324	6.59301	4.30998e-11	0.000492029	CDKN1B
1449	cdk regulation of dna replication	ceRNA	SRSF2	18	6	1	0.0220994	0.148324	6.59301	4.30998e-11	0.000492029	CDK2
1450	cdk regulation of dna replication	ceRNA	SUV39H1	18	6	1	0.0220994	0.148324	6.59301	4.30998e-11	0.000492029	CDK2
1451	cdk regulation of dna replication	ceRNA	SYT1	18	6	1	0.0220994	0.148324	6.59301	4.30998e-11	0.000492029	KITLG
1452	cdk regulation of dna replication	ceRNA	TARDBP	18	6	1	0.0220994	0.148324	6.59301	4.30998e-11	0.000492029	CDK2
1453	cdk regulation of dna replication	ceRNA	TDG	18	6	1	0.0220994	0.148324	6.59301	4.30998e-11	0.000492029	ORC2
1454	cdk regulation of dna replication	ceRNA	TIA1	18	6	1	0.0220994	0.148324	6.59301	4.30998e-11	0.000492029	ORC2
1455	cdk regulation of dna replication	ceRNA	TMEM87A	18	6	1	0.0220994	0.148324	6.59301	4.30998e-11	0.000492029	ORC2
1456	cdk regulation of dna replication	ceRNA	TNKS	18	6	1	0.0220994	0.148324	6.59301	4.30998e-11	0.000492029	ORC2
1457	cdk regulation of dna replication	ceRNA	TUBB	18	6	1	0.0220994	0.148324	6.59301	4.30998e-11	0.000492029	CCNE1
1458	cdk regulation of dna replication	ceRNA	TWF1	18	6	1	0.0220994	0.148324	6.59301	4.30998e-11	0.000492029	ORC2
1459	cdk regulation of dna replication	ceRNA	UBE2K	18	6	1	0.0220994	0.148324	6.59301	4.30998e-11	0.000492029	ORC5
1460	cdk regulation of dna replication	ceRNA	USP37	18	6	1	0.0220994	0.148324	6.59301	4.30998e-11	0.000492029	ORC2
1461	cdk regulation of dna replication	ceRNA	USP48	18	6	1	0.0220994	0.148324	6.59301	4.30998e-11	0.000492029	ORC2
1462	cdk regulation of dna replication	ceRNA	VPS4B	18	6	1	0.0220994	0.148324	6.59301	4.30998e-11	0.000492029	ORC2
1463	cdk regulation of dna replication	ceRNA	WAPAL	18	6	1	0.0220994	0.148324	6.59301	4.30998e-11	0.000492029	CDKN1B
1464	cdk regulation of dna replication	ceRNA	WWP1	18	6	1	0.0220994	0.148324	6.59301	4.30998e-11	0.000492029	CCNE1
1465	cdk regulation of dna replication	ceRNA	ZDHHC17	18	6	1	0.0220994	0.148324	6.59301	4.30998e-11	0.000492029	CDKN1B
1466	cdk regulation of dna replication	ceRNA	ZDHHC20	18	6	1	0.0220994	0.148324	6.59301	4.30998e-11	0.000492029	ORC2
1467	cdk regulation of dna replication	ceRNA	ZFPM2	18	6	1	0.0220994	0.148324	6.59301	4.30998e-11	0.000492029	KITLG
1468	cdk regulation of dna replication	ceRNA	ZIC1	18	6	1	0.0220994	0.148324	6.59301	4.30998e-11	0.000492029	KITLG
1469	cdk regulation of dna replication	ceRNA	ZNF367	18	6	1	0.0220994	0.148324	6.59301	4.30998e-11	0.000492029	CDK2
1470	cdk regulation of dna replication	ceRNA	ZSCAN29	18	6	1	0.0220994	0.148324	6.59301	4.30998e-11	0.000492029	ORC2
1471	cell cycle: g1/s check point	ceRNA	BBX	25	15	3	0.17966	0.41423	6.80863	9.85325e-12	0.000112485	GSK3B;RB1;SMAD4
1472	cell cycle: g1/s check point	ceRNA	BCL11A	25	15	3	0.17966	0.41423	6.80863	9.85325e-12	0.000112485	CCND1;CDKN1B;GSK3B
1473	cell cycle: g1/s check point	ceRNA	BTBD7	25	15	3	0.17966	0.41423	6.80863	9.85325e-12	0.000112485	GSK3B;RB1;SMAD4
1474	cell cycle: g1/s check point	ceRNA	CDC25A	25	15	3	0.17966	0.41423	6.80863	9.85325e-12	0.000112485	CCND1;RB1;TP53
1475	cell cycle: g1/s check point	ceRNA	CDK17	25	15	5	0.17966	0.41423	11.6369	2.67565e-31	3.05453e-24	CCND1;CDKN1B;GSK3B;SMAD4;TFDP1
1476	cell cycle: g1/s check point	ceRNA	CHEK1	25	15	3	0.17966	0.41423	6.80863	9.85325e-12	0.000112485	CCND1;CCNE1;CDC25A
1477	cell cycle: g1/s check point	ceRNA	CIT	25	15	3	0.17966	0.41423	6.80863	9.85325e-12	0.000112485	CDK2;E2F1;GSK3B
1478	cell cycle: g1/s check point	ceRNA	CPEB3	25	15	5	0.17966	0.41423	11.6369	2.67565e-31	3.05453e-24	CCND1;GSK3B;RB1;SMAD4;TFDP1
1479	cell cycle: g1/s check point	ceRNA	CPEB4	25	15	3	0.17966	0.41423	6.80863	9.85325e-12	0.000112485	CCND1;CDKN1B;GSK3B
1480	cell cycle: g1/s check point	ceRNA	CREBRF	25	15	4	0.17966	0.41423	9.22275	2.89576e-20	3.30581e-13	CDK6;GSK3B;RB1;SMAD4
1481	cell cycle: g1/s check point	ceRNA	CTDSPL2	25	15	3	0.17966	0.41423	6.80863	9.85325e-12	0.000112485	GSK3B;RB1;SMAD4
1482	cell cycle: g1/s check point	ceRNA	DACH1	25	15	3	0.17966	0.41423	6.80863	9.85325e-12	0.000112485	CCND1;GSK3B;TFDP1
1483	cell cycle: g1/s check point	ceRNA	DYRK1A	25	15	3	0.17966	0.41423	6.80863	9.85325e-12	0.000112485	GSK3B;RB1;TFDP1
1484	cell cycle: g1/s check point	ceRNA	EEA1	25	15	3	0.17966	0.41423	6.80863	9.85325e-12	0.000112485	CDK6;RB1;SMAD4
1485	cell cycle: g1/s check point	ceRNA	ELK3	25	15	3	0.17966	0.41423	6.80863	9.85325e-12	0.000112485	GSK3B;RB1;SMAD4
1486	cell cycle: g1/s check point	ceRNA	ERBB2IP	25	15	3	0.17966	0.41423	6.80863	9.85325e-12	0.000112485	CCND1;GSK3B;SMAD4
1487	cell cycle: g1/s check point	ceRNA	FNDC3A	25	15	3	0.17966	0.41423	6.80863	9.85325e-12	0.000112485	CCND1;GSK3B;RB1
1488	cell cycle: g1/s check point	ceRNA	FNDC3B	25	15	3	0.17966	0.41423	6.80863	9.85325e-12	0.000112485	CDK6;GSK3B;SMAD4
1489	cell cycle: g1/s check point	ceRNA	FRS2	25	15	4	0.17966	0.41423	9.22275	2.89576e-20	3.30581e-13	CCND1;CDK6;CDKN1B;RB1
1490	cell cycle: g1/s check point	ceRNA	GABPB1	25	15	3	0.17966	0.41423	6.80863	9.85325e-12	0.000112485	CDK2;GSK3B;SMAD4
1491	cell cycle: g1/s check point	ceRNA	IGF2BP3	25	15	4	0.17966	0.41423	9.22275	2.89576e-20	3.30581e-13	CCND1;CDK6;GSK3B;SMAD4
1492	cell cycle: g1/s check point	ceRNA	KIAA0494	25	15	3	0.17966	0.41423	6.80863	9.85325e-12	0.000112485	CCND1;RB1;SMAD4
1493	cell cycle: g1/s check point	ceRNA	KIF23	25	15	3	0.17966	0.41423	6.80863	9.85325e-12	0.000112485	CCNE1;CDC25A;E2F1
1494	cell cycle: g1/s check point	ceRNA	LCOR	25	15	4	0.17966	0.41423	9.22275	2.89576e-20	3.30581e-13	CCND1;GSK3B;RB1;SMAD4
1495	cell cycle: g1/s check point	ceRNA	LRCH1	25	15	3	0.17966	0.41423	6.80863	9.85325e-12	0.000112485	CDK6;GSK3B;SMAD4
1496	cell cycle: g1/s check point	ceRNA	MAP3K1	25	15	4	0.17966	0.41423	9.22275	2.89576e-20	3.30581e-13	CCND1;GSK3B;RB1;SMAD4
1497	cell cycle: g1/s check point	ceRNA	NBEA	25	15	3	0.17966	0.41423	6.80863	9.85325e-12	0.000112485	GSK3B;RB1;SMAD4
1498	cell cycle: g1/s check point	ceRNA	NCKAP1	25	15	3	0.17966	0.41423	6.80863	9.85325e-12	0.000112485	GSK3B;RB1;SMAD4
1499	cell cycle: g1/s check point	ceRNA	NPAT	25	15	3	0.17966	0.41423	6.80863	9.85325e-12	0.000112485	GSK3B;RB1;SMAD4
1500	cell cycle: g1/s check point	ceRNA	NRIP1	25	15	3	0.17966	0.41423	6.80863	9.85325e-12	0.000112485	CDKN1B;GSK3B;RB1
1501	cell cycle: g1/s check point	ceRNA	OTUD4	25	15	3	0.17966	0.41423	6.80863	9.85325e-12	0.000112485	GSK3B;RB1;SMAD4
1502	cell cycle: g1/s check point	ceRNA	PDIK1L	25	15	4	0.17966	0.41423	9.22275	2.89576e-20	3.30581e-13	CDK2;CDKN1B;GSK3B;SMAD4
1503	cell cycle: g1/s check point	ceRNA	RFX7	25	15	3	0.17966	0.41423	6.80863	9.85325e-12	0.000112485	CDKN1B;GSK3B;RB1
1504	cell cycle: g1/s check point	ceRNA	SYNCRIP	25	15	4	0.17966	0.41423	9.22275	2.89576e-20	3.30581e-13	GSK3B;RB1;SMAD4;TFDP1
1505	cell cycle: g1/s check point	ceRNA	TBC1D9	25	15	3	0.17966	0.41423	6.80863	9.85325e-12	0.000112485	CCND1;CDC25A;RB1
1506	cell cycle: g1/s check point	ceRNA	TET3	25	15	3	0.17966	0.41423	6.80863	9.85325e-12	0.000112485	GSK3B;RB1;SMAD4
1507	cell cycle: g1/s check point	ceRNA	WDFY3	25	15	4	0.17966	0.41423	9.22275	2.89576e-20	3.30581e-13	CCND1;GSK3B;RB1;TFDP1
1508	cell cycle: g1/s check point	ceRNA	YTHDF3	25	15	3	0.17966	0.41423	6.80863	9.85325e-12	0.000112485	GSK3B;RB1;SMAD4
1509	cell cycle: g1/s check point	ceRNA	ZFPM2	25	15	3	0.17966	0.41423	6.80863	9.85325e-12	0.000112485	CDK6;GSK3B;RB1
1510	cell cycle: g1/s check point	ceRNA	ZNF148	25	15	3	0.17966	0.41423	6.80863	9.85325e-12	0.000112485	GSK3B;RB1;SMAD4
1511	cell cycle: g1/s check point	ceRNA	ZNF367	25	15	5	0.17966	0.41423	11.6369	2.67565e-31	3.05453e-24	CCND1;CDC25A;CDK2;GSK3B;SMAD4
1512	cell cycle: g2/m checkpoint	ceRNA	CDC25A	21	11	3	0.147944	0.370925	7.68903	1.48255e-14	1.69248e-07	CHEK1;TP53;WEE1
1513	cell cycle: g2/m checkpoint	ceRNA	RUFY2	21	11	3	0.147944	0.370925	7.68903	1.48255e-14	1.69248e-07	EP300;PI4KA;WEE1
1514	cell cycle: g2/m checkpoint	ceRNA	USP32	21	11	3	0.147944	0.370925	7.68903	1.48255e-14	1.69248e-07	EP300;MYT1;WEE1
1515	ceramide signaling pathway	ceRNA	AFF4	33	12	4	0.290567	0.522212	7.10331	1.21804e-12	1.39052e-05	BCL2;MAP2K1;MAP2K4;MAP3K1
1516	ceramide signaling pathway	ceRNA	BACH2	33	12	4	0.290567	0.522212	7.10331	1.21804e-12	1.39052e-05	MAP2K4;MAP3K1;MAP4K4;MAPK1
1517	ceramide signaling pathway	ceRNA	C16orf52	33	12	4	0.290567	0.522212	7.10331	1.21804e-12	1.39052e-05	BAG4;BCL2;MAP3K1;RAF1
1518	ceramide signaling pathway	ceRNA	CDK17	33	12	6	0.290567	0.522212	10.9332	7.99774e-28	9.13025e-21	BCL2;CHUK;MAP2K1;MAP2K4;MAP3K1;MAPK1
1519	ceramide signaling pathway	ceRNA	CNOT6L	33	12	4	0.290567	0.522212	7.10331	1.21804e-12	1.39052e-05	MAP2K1;MAP2K4;MAP3K1;MAPK1
1520	ceramide signaling pathway	ceRNA	CPEB4	33	12	4	0.290567	0.522212	7.10331	1.21804e-12	1.39052e-05	CHUK;MAP2K4;MAP3K1;MAPK1
1521	ceramide signaling pathway	ceRNA	DOCK7	33	12	4	0.290567	0.522212	7.10331	1.21804e-12	1.39052e-05	MADD;MAP2K1;MAP3K1;MAP4K4
1522	ceramide signaling pathway	ceRNA	DYRK2	33	12	4	0.290567	0.522212	7.10331	1.21804e-12	1.39052e-05	CHUK;MAP3K1;MAP4K4;MAPK1
1523	ceramide signaling pathway	ceRNA	FAM179B	33	12	5	0.290567	0.522212	9.01824	1.91135e-19	2.182e-12	BAG4;BCL2;IKBKB;MAPK1;RAF1
1524	ceramide signaling pathway	ceRNA	FMR1	33	12	4	0.290567	0.522212	7.10331	1.21804e-12	1.39052e-05	MADD;MAP2K4;MAP3K1;MAPK1
1525	ceramide signaling pathway	ceRNA	FRS2	33	12	4	0.290567	0.522212	7.10331	1.21804e-12	1.39052e-05	BAG4;BCL2;MAP2K4;MAP3K1
1526	ceramide signaling pathway	ceRNA	FUBP3	33	12	5	0.290567	0.522212	9.01824	1.91135e-19	2.182e-12	BAG4;CHUK;MAP2K4;MAP3K1;MAPK1
1527	ceramide signaling pathway	ceRNA	LCOR	33	12	5	0.290567	0.522212	9.01824	1.91135e-19	2.182e-12	BCL2;MAP2K4;MAP3K1;MAP4K4;MAPK1
1528	ceramide signaling pathway	ceRNA	LCORL	33	12	4	0.290567	0.522212	7.10331	1.21804e-12	1.39052e-05	BAG4;CHUK;MAP3K1;MAPK1
1529	ceramide signaling pathway	ceRNA	NUFIP2	33	12	4	0.290567	0.522212	7.10331	1.21804e-12	1.39052e-05	CHUK;MAP3K1;MAPK1;RAF1
1530	ceramide signaling pathway	ceRNA	PHTF2	33	12	4	0.290567	0.522212	7.10331	1.21804e-12	1.39052e-05	MAP2K4;MAP3K1;MAP4K4;MAPK1
1531	ceramide signaling pathway	ceRNA	PPM1A	33	12	4	0.290567	0.522212	7.10331	1.21804e-12	1.39052e-05	BCL2;CHUK;MADD;MAP3K1
1532	ceramide signaling pathway	ceRNA	PPP1R12A	33	12	4	0.290567	0.522212	7.10331	1.21804e-12	1.39052e-05	MAP2K4;MAP3K1;MAP4K4;MAPK1
1533	ceramide signaling pathway	ceRNA	RBM12	33	12	4	0.290567	0.522212	7.10331	1.21804e-12	1.39052e-05	CHUK;MAP2K4;MAP3K1;MAPK1
1534	ceramide signaling pathway	ceRNA	RSBN1	33	12	5	0.290567	0.522212	9.01824	1.91135e-19	2.182e-12	CHUK;MADD;MAP2K4;MAP3K1;MAPK1
1535	ceramide signaling pathway	ceRNA	SEC24A	33	12	4	0.290567	0.522212	7.10331	1.21804e-12	1.39052e-05	BAG4;MAP2K4;MAP3K1;MAP4K4
1536	ceramide signaling pathway	ceRNA	SYNCRIP	33	12	4	0.290567	0.522212	7.10331	1.21804e-12	1.39052e-05	CHUK;MAP3K1;MAP4K4;MAPK1
1537	ceramide signaling pathway	ceRNA	TAB3	33	12	4	0.290567	0.522212	7.10331	1.21804e-12	1.39052e-05	BAG4;BCL2;MADD;MAP3K1
1538	ceramide signaling pathway	ceRNA	TBC1D15	33	12	4	0.290567	0.522212	7.10331	1.21804e-12	1.39052e-05	BAG4;CHUK;MAP3K1;MAPK1
1539	ceramide signaling pathway	ceRNA	TCF4	33	12	4	0.290567	0.522212	7.10331	1.21804e-12	1.39052e-05	MAP2K4;MAP3K1;MAP4K4;MAPK1
1540	ceramide signaling pathway	ceRNA	TNPO1	33	12	5	0.290567	0.522212	9.01824	1.91135e-19	2.182e-12	BAG4;CHUK;MAP3K1;MAP4K4;MAPK1
1541	ceramide signaling pathway	ceRNA	WWP1	33	12	5	0.290567	0.522212	9.01824	1.91135e-19	2.182e-12	BAG4;BCL2;MAP2K4;MAP3K1;RAF1
1542	ceramide signaling pathway	ceRNA	ZEB1	33	12	5	0.290567	0.522212	9.01824	1.91135e-19	2.182e-12	CHUK;MADD;MAP2K4;MAP4K4;MAPK1
1543	ceramide signaling pathway	ceRNA	ZEB2	33	12	4	0.290567	0.522212	7.10331	1.21804e-12	1.39052e-05	MAP2K4;MAP3K1;MAP4K4;MAPK1
1544	ceramide signaling pathway	ceRNA	ZFHX4	33	12	4	0.290567	0.522212	7.10331	1.21804e-12	1.39052e-05	BAG4;MAP3K1;MAP4K4;MAPK1
1545	chaperones modulate interferon signaling pathway	ceRNA	CDC25A	14	5	2	0.0435851	0.20686	9.45768	3.14851e-21	3.59435e-14	RB1;TP53
1546	chaperones modulate interferon signaling pathway	ceRNA	CREBRF	14	5	2	0.0435851	0.20686	9.45768	3.14851e-21	3.59435e-14	JAK2;RB1
1547	chaperones modulate interferon signaling pathway	ceRNA	FBXO30	14	5	2	0.0435851	0.20686	9.45768	3.14851e-21	3.59435e-14	CHUK;RB1
1548	chaperones modulate interferon signaling pathway	ceRNA	KPNA4	14	5	2	0.0435851	0.20686	9.45768	3.14851e-21	3.59435e-14	CHUK;RB1
1549	chaperones modulate interferon signaling pathway	ceRNA	RBL2	14	5	2	0.0435851	0.20686	9.45768	3.14851e-21	3.59435e-14	CHUK;RB1
1550	chaperones modulate interferon signaling pathway	ceRNA	SYNCRIP	14	5	2	0.0435851	0.20686	9.45768	3.14851e-21	3.59435e-14	CHUK;RB1
1551	chaperones modulate interferon signaling pathway	ceRNA	VPS26A	14	5	2	0.0435851	0.20686	9.45768	3.14851e-21	3.59435e-14	CHUK;RB1
1552	chrebp regulation by carbohydrates and camp	ceRNA	ACVR1	40	18	3	0.127481	0.353793	8.11921	4.69228e-16	5.35672e-09	CXCL12;EDNRA;PRKAA1
1553	chrebp regulation by carbohydrates and camp	ceRNA	ARID5B	40	18	3	0.127481	0.353793	8.11921	4.69228e-16	5.35672e-09	CXCL12;EDN1;PRKAR1A
1554	chrebp regulation by carbohydrates and camp	ceRNA	ATXN1	40	18	4	0.127481	0.353793	10.9457	6.96774e-28	7.95439e-21	CXCL12;HTR2C;PRKAA1;PRKAR1A
1555	chrebp regulation by carbohydrates and camp	ceRNA	BCL11A	40	18	3	0.127481	0.353793	8.11921	4.69228e-16	5.35672e-09	CXCL12;EDNRB;PRKAR1A
1556	chrebp regulation by carbohydrates and camp	ceRNA	BNC2	40	18	3	0.127481	0.353793	8.11921	4.69228e-16	5.35672e-09	CXCL12;PRKACB;PRKAR1A
1557	chrebp regulation by carbohydrates and camp	ceRNA	CAND1	40	18	3	0.127481	0.353793	8.11921	4.69228e-16	5.35672e-09	GNB1;PRKAB2;PRKAR1A
1558	chrebp regulation by carbohydrates and camp	ceRNA	CHD9	40	18	3	0.127481	0.353793	8.11921	4.69228e-16	5.35672e-09	PRKAA1;PRKACB;PRKAR1A
1559	chrebp regulation by carbohydrates and camp	ceRNA	CPEB2	40	18	4	0.127481	0.353793	10.9457	6.96774e-28	7.95439e-21	GNB1;PRKAA1;PRKACB;PRKAR2B
1560	chrebp regulation by carbohydrates and camp	ceRNA	CPEB4	40	18	3	0.127481	0.353793	8.11921	4.69228e-16	5.35672e-09	CXCL12;GNB1;PRKACB
1561	chrebp regulation by carbohydrates and camp	ceRNA	CREBRF	40	18	3	0.127481	0.353793	8.11921	4.69228e-16	5.35672e-09	CXCL12;GNB1;PRKAR1A
1562	chrebp regulation by carbohydrates and camp	ceRNA	DMD	40	18	3	0.127481	0.353793	8.11921	4.69228e-16	5.35672e-09	ADRB2;EDN1;PRKAA1
1563	chrebp regulation by carbohydrates and camp	ceRNA	DYNC1LI2	40	18	3	0.127481	0.353793	8.11921	4.69228e-16	5.35672e-09	GNB1;PRKAA1;PRKACB
1564	chrebp regulation by carbohydrates and camp	ceRNA	ELK3	40	18	3	0.127481	0.353793	8.11921	4.69228e-16	5.35672e-09	CXCL12;PRKAA1;PRKACB
1565	chrebp regulation by carbohydrates and camp	ceRNA	FAT3	40	18	3	0.127481	0.353793	8.11921	4.69228e-16	5.35672e-09	CXCL12;GNB1;PRKACB
1566	chrebp regulation by carbohydrates and camp	ceRNA	LCOR	40	18	5	0.127481	0.353793	13.7722	3.74629e-43	4.27678e-36	CXCL12;GNB1;PRKAA1;PRKAA2;PRKAR1A
1567	chrebp regulation by carbohydrates and camp	ceRNA	LRCH1	40	18	3	0.127481	0.353793	8.11921	4.69228e-16	5.35672e-09	GNB1;PRKAA1;PRKACB
1568	chrebp regulation by carbohydrates and camp	ceRNA	LRCH2	40	18	3	0.127481	0.353793	8.11921	4.69228e-16	5.35672e-09	CXCL12;EDNRA;PRKACB
1569	chrebp regulation by carbohydrates and camp	ceRNA	MBNL1	40	18	3	0.127481	0.353793	8.11921	4.69228e-16	5.35672e-09	CXCL12;PRKAA1;PRKACB
1570	chrebp regulation by carbohydrates and camp	ceRNA	MET	40	18	3	0.127481	0.353793	8.11921	4.69228e-16	5.35672e-09	CXCL12;EDN1;PRKACB
1571	chrebp regulation by carbohydrates and camp	ceRNA	PTEN	40	18	3	0.127481	0.353793	8.11921	4.69228e-16	5.35672e-09	PRKAA1;PRKACB;PRKAR1A
1572	chrebp regulation by carbohydrates and camp	ceRNA	SNRK	40	18	3	0.127481	0.353793	8.11921	4.69228e-16	5.35672e-09	CXCR4;EDNRB;PRKACB
1573	chrebp regulation by carbohydrates and camp	ceRNA	TCF4	40	18	3	0.127481	0.353793	8.11921	4.69228e-16	5.35672e-09	GNB1;PRKAA1;PRKACB
1574	chrebp regulation by carbohydrates and camp	ceRNA	TET3	40	18	3	0.127481	0.353793	8.11921	4.69228e-16	5.35672e-09	GNB1;PRKAA1;PRKACB
1575	chrebp regulation by carbohydrates and camp	ceRNA	TOX	40	18	4	0.127481	0.353793	10.9457	6.96774e-28	7.95439e-21	CXCL12;CXCR4;EDNRB;PRKACB
1576	chrebp regulation by carbohydrates and camp	ceRNA	ZEB1	40	18	3	0.127481	0.353793	8.11921	4.69228e-16	5.35672e-09	CXCL12;PRKAA1;PRKACB
1577	chrebp regulation by carbohydrates and camp	ceRNA	ZEB2	40	18	4	0.127481	0.353793	10.9457	6.96774e-28	7.95439e-21	CXCL12;GNB1;PRKACB;PRKAR1A
1578	chrebp regulation by carbohydrates and camp	ceRNA	ZFPM2	40	18	4	0.127481	0.353793	10.9457	6.96774e-28	7.95439e-21	CXCL12;GNB1;PRKAA1;PRKACB
1579	chromatin remodeling by hswi/snf atp-dependent complexes	ceRNA	ACVR2B	16	10	3	0.135871	0.359386	7.96952	1.59292e-15	1.81848e-08	NF1;NR3C1;SMARCC1
1580	chromatin remodeling by hswi/snf atp-dependent complexes	ceRNA	AFF4	16	10	3	0.135871	0.359386	7.96952	1.59292e-15	1.81848e-08	NF1;NR3C1;SMARCC1
1581	chromatin remodeling by hswi/snf atp-dependent complexes	ceRNA	ARID4A	16	10	3	0.135871	0.359386	7.96952	1.59292e-15	1.81848e-08	NF1;NR3C1;SMARCC2
1582	chromatin remodeling by hswi/snf atp-dependent complexes	ceRNA	BCL11A	16	10	3	0.135871	0.359386	7.96952	1.59292e-15	1.81848e-08	ARID1A;NF1;NR3C1
1583	chromatin remodeling by hswi/snf atp-dependent complexes	ceRNA	COL4A3BP	16	10	3	0.135871	0.359386	7.96952	1.59292e-15	1.81848e-08	NF1;NR3C1;SMARCC1
1584	chromatin remodeling by hswi/snf atp-dependent complexes	ceRNA	LCOR	16	10	3	0.135871	0.359386	7.96952	1.59292e-15	1.81848e-08	ARID1A;NF1;NR3C1
1585	chromatin remodeling by hswi/snf atp-dependent complexes	ceRNA	PDS5B	16	10	4	0.135871	0.359386	10.752	5.79904e-27	6.6202e-20	ARID1A;GTF2A1;NF1;NR3C1
1586	chromatin remodeling by hswi/snf atp-dependent complexes	ceRNA	PPP1R12A	16	10	3	0.135871	0.359386	7.96952	1.59292e-15	1.81848e-08	ARID1A;NF1;NR3C1
1587	chromatin remodeling by hswi/snf atp-dependent complexes	ceRNA	SIRT1	16	10	3	0.135871	0.359386	7.96952	1.59292e-15	1.81848e-08	ARID1A;NF1;NR3C1
1588	chromatin remodeling by hswi/snf atp-dependent complexes	ceRNA	SNX13	16	10	3	0.135871	0.359386	7.96952	1.59292e-15	1.81848e-08	NF1;NR3C1;SMARCC2
1589	control of skeletal myogenesis by hdac and calcium/calmodulin-dependent kinase (camk)	ceRNA	ACVR2B	15	9	3	0.157561	0.38783	7.32908	2.31738e-13	2.64553e-06	MEF2A;MEF2D;PDPK1
1590	control of skeletal myogenesis by hdac and calcium/calmodulin-dependent kinase (camk)	ceRNA	AFF4	15	9	3	0.157561	0.38783	7.32908	2.31738e-13	2.64553e-06	MEF2D;PDPK1;PIK3R1
1591	control of skeletal myogenesis by hdac and calcium/calmodulin-dependent kinase (camk)	ceRNA	ARID4A	15	9	3	0.157561	0.38783	7.32908	2.31738e-13	2.64553e-06	MEF2A;MEF2C;PIK3R1
1592	control of skeletal myogenesis by hdac and calcium/calmodulin-dependent kinase (camk)	ceRNA	ARID5B	15	9	3	0.157561	0.38783	7.32908	2.31738e-13	2.64553e-06	MEF2A;PIK3CA;PIK3R1
1593	control of skeletal myogenesis by hdac and calcium/calmodulin-dependent kinase (camk)	ceRNA	ASH1L	15	9	3	0.157561	0.38783	7.32908	2.31738e-13	2.64553e-06	MEF2A;MEF2C;PIK3R1
1594	control of skeletal myogenesis by hdac and calcium/calmodulin-dependent kinase (camk)	ceRNA	ATXN7	15	9	3	0.157561	0.38783	7.32908	2.31738e-13	2.64553e-06	MEF2A;MEF2D;PDPK1
1595	control of skeletal myogenesis by hdac and calcium/calmodulin-dependent kinase (camk)	ceRNA	BNC2	15	9	4	0.157561	0.38783	9.90752	3.86111e-23	4.40786e-16	MEF2A;MEF2C;PIK3CA;PIK3R1
1596	control of skeletal myogenesis by hdac and calcium/calmodulin-dependent kinase (camk)	ceRNA	CAPZA2	15	9	3	0.157561	0.38783	7.32908	2.31738e-13	2.64553e-06	MEF2A;MEF2C;PDPK1
1597	control of skeletal myogenesis by hdac and calcium/calmodulin-dependent kinase (camk)	ceRNA	CDK17	15	9	3	0.157561	0.38783	7.32908	2.31738e-13	2.64553e-06	MAPK14;MEF2A;MEF2C
1598	control of skeletal myogenesis by hdac and calcium/calmodulin-dependent kinase (camk)	ceRNA	CHD9	15	9	3	0.157561	0.38783	7.32908	2.31738e-13	2.64553e-06	MEF2A;MEF2C;MEF2D
1599	control of skeletal myogenesis by hdac and calcium/calmodulin-dependent kinase (camk)	ceRNA	CPEB3	15	9	3	0.157561	0.38783	7.32908	2.31738e-13	2.64553e-06	MEF2A;MEF2C;MEF2D
1600	control of skeletal myogenesis by hdac and calcium/calmodulin-dependent kinase (camk)	ceRNA	CPEB4	15	9	3	0.157561	0.38783	7.32908	2.31738e-13	2.64553e-06	MEF2A;MEF2C;PIK3CA
1601	control of skeletal myogenesis by hdac and calcium/calmodulin-dependent kinase (camk)	ceRNA	CREBRF	15	9	3	0.157561	0.38783	7.32908	2.31738e-13	2.64553e-06	MEF2A;MEF2C;PIK3R1
1602	control of skeletal myogenesis by hdac and calcium/calmodulin-dependent kinase (camk)	ceRNA	FGD4	15	9	3	0.157561	0.38783	7.32908	2.31738e-13	2.64553e-06	MEF2A;MEF2C;PIK3CA
1603	control of skeletal myogenesis by hdac and calcium/calmodulin-dependent kinase (camk)	ceRNA	FMR1	15	9	4	0.157561	0.38783	9.90752	3.86111e-23	4.40786e-16	MEF2A;MEF2D;PDPK1;PIK3CA
1604	control of skeletal myogenesis by hdac and calcium/calmodulin-dependent kinase (camk)	ceRNA	FOXO1	15	9	3	0.157561	0.38783	7.32908	2.31738e-13	2.64553e-06	MEF2A;MEF2C;PIK3R1
1605	control of skeletal myogenesis by hdac and calcium/calmodulin-dependent kinase (camk)	ceRNA	FOXP1	15	9	4	0.157561	0.38783	9.90752	3.86111e-23	4.40786e-16	MEF2A;MEF2C;PIK3CA;PIK3R1
1606	control of skeletal myogenesis by hdac and calcium/calmodulin-dependent kinase (camk)	ceRNA	KIF5B	15	9	3	0.157561	0.38783	7.32908	2.31738e-13	2.64553e-06	MEF2A;MEF2D;PIK3CA
1607	control of skeletal myogenesis by hdac and calcium/calmodulin-dependent kinase (camk)	ceRNA	KLHL15	15	9	3	0.157561	0.38783	7.32908	2.31738e-13	2.64553e-06	MEF2A;MEF2C;PIK3CA
1608	control of skeletal myogenesis by hdac and calcium/calmodulin-dependent kinase (camk)	ceRNA	LCOR	15	9	3	0.157561	0.38783	7.32908	2.31738e-13	2.64553e-06	MEF2A;MEF2C;MEF2D
1609	control of skeletal myogenesis by hdac and calcium/calmodulin-dependent kinase (camk)	ceRNA	NFIB	15	9	4	0.157561	0.38783	9.90752	3.86111e-23	4.40786e-16	MEF2A;MEF2C;PIK3CA;PIK3R1
1610	control of skeletal myogenesis by hdac and calcium/calmodulin-dependent kinase (camk)	ceRNA	PPP1R12A	15	9	3	0.157561	0.38783	7.32908	2.31738e-13	2.64553e-06	MEF2A;MEF2C;MEF2D
1611	control of skeletal myogenesis by hdac and calcium/calmodulin-dependent kinase (camk)	ceRNA	SCN2A	15	9	3	0.157561	0.38783	7.32908	2.31738e-13	2.64553e-06	MEF2A;MEF2C;MEF2D
1612	control of skeletal myogenesis by hdac and calcium/calmodulin-dependent kinase (camk)	ceRNA	TCF4	15	9	3	0.157561	0.38783	7.32908	2.31738e-13	2.64553e-06	MEF2A;MEF2C;PIK3R1
1613	control of skeletal myogenesis by hdac and calcium/calmodulin-dependent kinase (camk)	ceRNA	TGFBR2	15	9	4	0.157561	0.38783	9.90752	3.86111e-23	4.40786e-16	MEF2A;MEF2C;PIK3CA;PIK3R1
1614	control of skeletal myogenesis by hdac and calcium/calmodulin-dependent kinase (camk)	ceRNA	TSHZ3	15	9	3	0.157561	0.38783	7.32908	2.31738e-13	2.64553e-06	MEF2A;MEF2C;PIK3CA
1615	control of skeletal myogenesis by hdac and calcium/calmodulin-dependent kinase (camk)	ceRNA	UBL3	15	9	3	0.157561	0.38783	7.32908	2.31738e-13	2.64553e-06	MEF2A;MEF2C;PDPK1
1616	control of skeletal myogenesis by hdac and calcium/calmodulin-dependent kinase (camk)	ceRNA	YTHDF3	15	9	3	0.157561	0.38783	7.32908	2.31738e-13	2.64553e-06	MEF2A;MEF2C;PDPK1
1617	control of skeletal myogenesis by hdac and calcium/calmodulin-dependent kinase (camk)	ceRNA	ZFHX4	15	9	4	0.157561	0.38783	9.90752	3.86111e-23	4.40786e-16	MEF2A;MEF2C;MEF2D;PIK3CA
1618	corticosteroids and cardioprotection	ceRNA	ACVR1	25	10	3	0.137712	0.365023	7.8414	4.45551e-15	5.08642e-08	CXCL12;NR3C1;PIK3CA
1619	corticosteroids and cardioprotection	ceRNA	AFF4	25	10	3	0.137712	0.365023	7.8414	4.45551e-15	5.08642e-08	NR3C1;PDPK1;PIK3R1
1620	corticosteroids and cardioprotection	ceRNA	ARID5B	25	10	5	0.137712	0.365023	13.3205	1.75925e-40	2.00837e-33	CXCL12;EDN1;NR3C1;PIK3CA;PIK3R1
1621	corticosteroids and cardioprotection	ceRNA	BNC2	25	10	3	0.137712	0.365023	7.8414	4.45551e-15	5.08642e-08	CXCL12;PIK3CA;PIK3R1
1622	corticosteroids and cardioprotection	ceRNA	CAND1	25	10	3	0.137712	0.365023	7.8414	4.45551e-15	5.08642e-08	GNB1;NR3C1;PIK3CA
1623	corticosteroids and cardioprotection	ceRNA	CPEB4	25	10	3	0.137712	0.365023	7.8414	4.45551e-15	5.08642e-08	CXCL12;GNB1;PIK3CA
1624	corticosteroids and cardioprotection	ceRNA	CREBRF	25	10	4	0.137712	0.365023	10.581	3.65041e-26	4.16732e-19	CXCL12;GNB1;NR3C1;PIK3R1
1625	corticosteroids and cardioprotection	ceRNA	FMR1	25	10	3	0.137712	0.365023	7.8414	4.45551e-15	5.08642e-08	NR3C1;PDPK1;PIK3CA
1626	corticosteroids and cardioprotection	ceRNA	FOXO1	25	10	4	0.137712	0.365023	10.581	3.65041e-26	4.16732e-19	ADRB2;GNB1;NR3C1;PIK3R1
1627	corticosteroids and cardioprotection	ceRNA	KLHL15	25	10	3	0.137712	0.365023	7.8414	4.45551e-15	5.08642e-08	GNB1;NR3C1;PIK3CA
1628	corticosteroids and cardioprotection	ceRNA	LCOR	25	10	3	0.137712	0.365023	7.8414	4.45551e-15	5.08642e-08	CXCL12;GNB1;NR3C1
1629	corticosteroids and cardioprotection	ceRNA	MET	25	10	3	0.137712	0.365023	7.8414	4.45551e-15	5.08642e-08	CXCL12;EDN1;NR3C1
1630	corticosteroids and cardioprotection	ceRNA	MIER3	25	10	3	0.137712	0.365023	7.8414	4.45551e-15	5.08642e-08	GNB1;NR3C1;PIK3CA
1631	corticosteroids and cardioprotection	ceRNA	NFIB	25	10	3	0.137712	0.365023	7.8414	4.45551e-15	5.08642e-08	NR3C1;PIK3CA;PIK3R1
1632	corticosteroids and cardioprotection	ceRNA	RBMS1	25	10	3	0.137712	0.365023	7.8414	4.45551e-15	5.08642e-08	CAV1;NR3C1;PIK3R1
1633	corticosteroids and cardioprotection	ceRNA	SEMA6D	25	10	3	0.137712	0.365023	7.8414	4.45551e-15	5.08642e-08	CAV1;GNB1;NR3C1
1634	corticosteroids and cardioprotection	ceRNA	TCF4	25	10	4	0.137712	0.365023	10.581	3.65041e-26	4.16732e-19	CAV1;GNB1;NR3C1;PIK3R1
1635	corticosteroids and cardioprotection	ceRNA	TGFBR2	25	10	3	0.137712	0.365023	7.8414	4.45551e-15	5.08642e-08	CXCL12;PIK3CA;PIK3R1
1636	corticosteroids and cardioprotection	ceRNA	ZEB2	25	10	4	0.137712	0.365023	10.581	3.65041e-26	4.16732e-19	CAV1;CXCL12;GNB1;NR3C1
1637	corticosteroids and cardioprotection	ceRNA	ZFPM2	25	10	3	0.137712	0.365023	7.8414	4.45551e-15	5.08642e-08	CXCL12;GNB1;PIK3R1
1638	ctcf: first multivalent nuclear factor	ceRNA	ANKIB1	23	15	5	0.479026	0.669341	6.75437	1.43457e-11	0.000163771	CTCF;PTEN;RPS6KB1;SMAD1;SMAD5
1639	ctcf: first multivalent nuclear factor	ceRNA	ANKRD50	23	15	7	0.479026	0.669341	9.74238	1.98842e-22	2.26999e-15	CTCF;PIK3CA;PTEN;RPS6KB1;SMAD1;SMAD4;SMAD5
1640	ctcf: first multivalent nuclear factor	ceRNA	ARID4A	23	15	6	0.479026	0.669341	8.24838	1.60556e-16	1.83291e-09	CTCF;PIK3R1;PTEN;RPS6KB1;SMAD1;SMAD4
1641	ctcf: first multivalent nuclear factor	ceRNA	ARID4B	23	15	6	0.479026	0.669341	8.24838	1.60556e-16	1.83291e-09	CTCF;PIK3CA;PTEN;RPS6KB1;SMAD1;SMAD5
1642	ctcf: first multivalent nuclear factor	ceRNA	ARID5B	23	15	7	0.479026	0.669341	9.74238	1.98842e-22	2.26999e-15	PIK3CA;PIK3R1;PTEN;RPS6KB1;SMAD5;TGFBR1;TGFBR2
1643	ctcf: first multivalent nuclear factor	ceRNA	ATRX	23	15	5	0.479026	0.669341	6.75437	1.43457e-11	0.000163771	CTCF;PTEN;RPS6KB1;SMAD1;SMAD5
1644	ctcf: first multivalent nuclear factor	ceRNA	ATXN1	23	15	6	0.479026	0.669341	8.24838	1.60556e-16	1.83291e-09	CTCF;PTEN;RPS6KB1;SMAD1;SMAD4;TGFBR2
1645	ctcf: first multivalent nuclear factor	ceRNA	BBX	23	15	6	0.479026	0.669341	8.24838	1.60556e-16	1.83291e-09	CTCF;PTEN;RPS6KB1;SMAD1;SMAD4;SMAD5
1646	ctcf: first multivalent nuclear factor	ceRNA	BCL2L11	23	15	7	0.479026	0.669341	9.74238	1.98842e-22	2.26999e-15	CTCF;PIK3CA;PTEN;RPS6KB1;SMAD1;SMAD4;SMAD5
1647	ctcf: first multivalent nuclear factor	ceRNA	BNC2	23	15	5	0.479026	0.669341	6.75437	1.43457e-11	0.000163771	PIK3CA;PIK3R1;PTEN;SMAD1;TGFBR2
1648	ctcf: first multivalent nuclear factor	ceRNA	BTBD7	23	15	5	0.479026	0.669341	6.75437	1.43457e-11	0.000163771	PIK3CA;PTEN;SMAD1;SMAD4;SMAD5
1649	ctcf: first multivalent nuclear factor	ceRNA	CCNT2	23	15	5	0.479026	0.669341	6.75437	1.43457e-11	0.000163771	CTCF;PTEN;RPS6KB1;SMAD1;SMAD5
1650	ctcf: first multivalent nuclear factor	ceRNA	CDK17	23	15	7	0.479026	0.669341	9.74238	1.98842e-22	2.26999e-15	CDKN1B;CTCF;PTEN;RPS6KB1;SMAD1;SMAD4;SMAD5
1651	ctcf: first multivalent nuclear factor	ceRNA	CELF1	23	15	5	0.479026	0.669341	6.75437	1.43457e-11	0.000163771	CTCF;PTEN;RPS6KB1;SMAD1;SMAD5
1652	ctcf: first multivalent nuclear factor	ceRNA	CELF2	23	15	5	0.479026	0.669341	6.75437	1.43457e-11	0.000163771	CTCF;PIK3R1;PTEN;TGFB2;TGFBR1
1653	ctcf: first multivalent nuclear factor	ceRNA	CNOT6L	23	15	5	0.479026	0.669341	6.75437	1.43457e-11	0.000163771	CTCF;PTEN;RPS6KB1;SMAD1;SMAD5
1654	ctcf: first multivalent nuclear factor	ceRNA	CPEB3	23	15	8	0.479026	0.669341	11.2364	2.70177e-29	3.08435e-22	CTCF;PTEN;RPS6KB1;SMAD1;SMAD4;SMAD5;TGFBR1;TGFBR2
1655	ctcf: first multivalent nuclear factor	ceRNA	CREB1	23	15	6	0.479026	0.669341	8.24838	1.60556e-16	1.83291e-09	PTEN;RPS6KB1;SMAD1;SMAD4;SMAD5;TGFBR1
1656	ctcf: first multivalent nuclear factor	ceRNA	CREBRF	23	15	10	0.479026	0.669341	14.2244	6.46565e-46	7.38121e-39	CTCF;MTOR;PIK3R1;PTEN;RPS6KB1;SMAD1;SMAD4;SMAD5;TGFB2;TGFBR2
1657	ctcf: first multivalent nuclear factor	ceRNA	CTDSPL2	23	15	5	0.479026	0.669341	6.75437	1.43457e-11	0.000163771	PTEN;RPS6KB1;SMAD1;SMAD4;SMAD5
1658	ctcf: first multivalent nuclear factor	ceRNA	DDX3X	23	15	6	0.479026	0.669341	8.24838	1.60556e-16	1.83291e-09	PIK3CA;PTEN;RPS6KB1;SMAD1;SMAD5;TGFBR1
1659	ctcf: first multivalent nuclear factor	ceRNA	DYNC1LI2	23	15	6	0.479026	0.669341	8.24838	1.60556e-16	1.83291e-09	CTCF;PTEN;RPS6KB1;SMAD1;SMAD4;TGFBR2
1660	ctcf: first multivalent nuclear factor	ceRNA	EIF2C4	23	15	5	0.479026	0.669341	6.75437	1.43457e-11	0.000163771	CDKN1B;PTEN;RPS6KB1;SMAD5;TGFBR1
1661	ctcf: first multivalent nuclear factor	ceRNA	ELK3	23	15	8	0.479026	0.669341	11.2364	2.70177e-29	3.08435e-22	CTCF;PTEN;RPS6KB1;SMAD1;SMAD4;SMAD5;TGFB2;TGFBR2
1662	ctcf: first multivalent nuclear factor	ceRNA	FMR1	23	15	6	0.479026	0.669341	8.24838	1.60556e-16	1.83291e-09	CTCF;PIK3CA;PTEN;RPS6KB1;SMAD1;SMAD5
1663	ctcf: first multivalent nuclear factor	ceRNA	FNDC3B	23	15	5	0.479026	0.669341	6.75437	1.43457e-11	0.000163771	PTEN;SMAD1;SMAD4;TGFB2;TGFBR1
1664	ctcf: first multivalent nuclear factor	ceRNA	FOXJ3	23	15	5	0.479026	0.669341	6.75437	1.43457e-11	0.000163771	PIK3R1;PTEN;SMAD1;SMAD4;SMAD5
1665	ctcf: first multivalent nuclear factor	ceRNA	FOXP1	23	15	7	0.479026	0.669341	9.74238	1.98842e-22	2.26999e-15	CTCF;PIK3CA;PIK3R1;PTEN;RPS6KB1;SMAD4;TGFBR1
1666	ctcf: first multivalent nuclear factor	ceRNA	FUBP3	23	15	5	0.479026	0.669341	6.75437	1.43457e-11	0.000163771	CTCF;PTEN;RPS6KB1;SMAD1;SMAD5
1667	ctcf: first multivalent nuclear factor	ceRNA	GABPB1	23	15	6	0.479026	0.669341	8.24838	1.60556e-16	1.83291e-09	CTCF;PIK3CA;PTEN;SMAD1;SMAD4;SMAD5
1668	ctcf: first multivalent nuclear factor	ceRNA	GMFB	23	15	5	0.479026	0.669341	6.75437	1.43457e-11	0.000163771	PIK3CA;PTEN;RPS6KB1;SMAD1;SMAD5
1669	ctcf: first multivalent nuclear factor	ceRNA	INO80D	23	15	5	0.479026	0.669341	6.75437	1.43457e-11	0.000163771	CTCF;PTEN;RPS6KB1;SMAD1;SMAD4
1670	ctcf: first multivalent nuclear factor	ceRNA	KAT6A	23	15	5	0.479026	0.669341	6.75437	1.43457e-11	0.000163771	CTCF;PIK3CA;PTEN;SMAD1;SMAD5
1671	ctcf: first multivalent nuclear factor	ceRNA	KPNA3	23	15	6	0.479026	0.669341	8.24838	1.60556e-16	1.83291e-09	CTCF;PTEN;SMAD1;SMAD4;SMAD5;TGFBR2
1672	ctcf: first multivalent nuclear factor	ceRNA	LCOR	23	15	7	0.479026	0.669341	9.74238	1.98842e-22	2.26999e-15	CTCF;PTEN;RPS6KB1;SMAD1;SMAD4;SMAD5;TGFBR2
1673	ctcf: first multivalent nuclear factor	ceRNA	LCORL	23	15	6	0.479026	0.669341	8.24838	1.60556e-16	1.83291e-09	CTCF;PTEN;RPS6KB1;SMAD1;SMAD4;SMAD5
1674	ctcf: first multivalent nuclear factor	ceRNA	MAP3K1	23	15	6	0.479026	0.669341	8.24838	1.60556e-16	1.83291e-09	CTCF;PTEN;RPS6KB1;SMAD1;SMAD4;TGFB2
1675	ctcf: first multivalent nuclear factor	ceRNA	MBNL1	23	15	5	0.479026	0.669341	6.75437	1.43457e-11	0.000163771	CTCF;PTEN;RPS6KB1;SMAD4;TGFBR2
1676	ctcf: first multivalent nuclear factor	ceRNA	MIER3	23	15	6	0.479026	0.669341	8.24838	1.60556e-16	1.83291e-09	CTCF;PIK3CA;PTEN;RPS6KB1;SMAD1;SMAD5
1677	ctcf: first multivalent nuclear factor	ceRNA	MLL3	23	15	5	0.479026	0.669341	6.75437	1.43457e-11	0.000163771	CTCF;PTEN;RPS6KB1;SMAD1;SMAD5
1678	ctcf: first multivalent nuclear factor	ceRNA	MTF1	23	15	5	0.479026	0.669341	6.75437	1.43457e-11	0.000163771	PIK3CA;PTEN;SMAD1;SMAD5;TGFBR2
1679	ctcf: first multivalent nuclear factor	ceRNA	NFIB	23	15	5	0.479026	0.669341	6.75437	1.43457e-11	0.000163771	PIK3CA;PIK3R1;RPS6KB1;SMAD6;TGFBR2
1680	ctcf: first multivalent nuclear factor	ceRNA	NLK	23	15	5	0.479026	0.669341	6.75437	1.43457e-11	0.000163771	CTCF;PTEN;RPS6KB1;SMAD1;SMAD5
1681	ctcf: first multivalent nuclear factor	ceRNA	NUFIP2	23	15	5	0.479026	0.669341	6.75437	1.43457e-11	0.000163771	CDKN1B;PTEN;RPS6KB1;SMAD1;SMAD5
1682	ctcf: first multivalent nuclear factor	ceRNA	OTUD4	23	15	5	0.479026	0.669341	6.75437	1.43457e-11	0.000163771	PTEN;RPS6KB1;SMAD1;SMAD4;SMAD5
1683	ctcf: first multivalent nuclear factor	ceRNA	PAN3	23	15	5	0.479026	0.669341	6.75437	1.43457e-11	0.000163771	CTCF;PIK3CA;PTEN;RPS6KB1;SMAD5
1684	ctcf: first multivalent nuclear factor	ceRNA	PDIK1L	23	15	6	0.479026	0.669341	8.24838	1.60556e-16	1.83291e-09	CDKN1B;PIK3CA;PTEN;RPS6KB1;SMAD4;SMAD5
1685	ctcf: first multivalent nuclear factor	ceRNA	PDS5B	23	15	5	0.479026	0.669341	6.75437	1.43457e-11	0.000163771	CTCF;PTEN;RPS6KB1;SMAD1;SMAD5
1686	ctcf: first multivalent nuclear factor	ceRNA	PHTF2	23	15	5	0.479026	0.669341	6.75437	1.43457e-11	0.000163771	CTCF;RPS6KB1;SMAD1;SMAD4;SMAD5
1687	ctcf: first multivalent nuclear factor	ceRNA	PTEN	23	15	5	0.479026	0.669341	6.75437	1.43457e-11	0.000163771	CTCF;PIK3R1;SMAD5;TGFB2;TGFBR2
1688	ctcf: first multivalent nuclear factor	ceRNA	PURB	23	15	6	0.479026	0.669341	8.24838	1.60556e-16	1.83291e-09	CTCF;PTEN;RPS6KB1;SMAD1;SMAD4;SMAD5
1689	ctcf: first multivalent nuclear factor	ceRNA	QKI	23	15	6	0.479026	0.669341	8.24838	1.60556e-16	1.83291e-09	PIK3R1;PTEN;RPS6KB1;SMAD4;SMAD5;TGFB2
1690	ctcf: first multivalent nuclear factor	ceRNA	RNF111	23	15	5	0.479026	0.669341	6.75437	1.43457e-11	0.000163771	CTCF;RPS6KB1;SMAD1;SMAD4;SMAD5
1691	ctcf: first multivalent nuclear factor	ceRNA	RORA	23	15	6	0.479026	0.669341	8.24838	1.60556e-16	1.83291e-09	CTCF;PTEN;RPS6KB1;SMAD1;SMAD4;TGFBR2
1692	ctcf: first multivalent nuclear factor	ceRNA	RSBN1	23	15	6	0.479026	0.669341	8.24838	1.60556e-16	1.83291e-09	CTCF;PTEN;RPS6KB1;SMAD1;SMAD5;TGFBR2
1693	ctcf: first multivalent nuclear factor	ceRNA	SP4	23	15	6	0.479026	0.669341	8.24838	1.60556e-16	1.83291e-09	CTCF;PTEN;RPS6KB1;SMAD1;SMAD4;TGFBR1
1694	ctcf: first multivalent nuclear factor	ceRNA	SUZ12	23	15	5	0.479026	0.669341	6.75437	1.43457e-11	0.000163771	PIK3CA;PTEN;RPS6KB1;SMAD1;SMAD5
1695	ctcf: first multivalent nuclear factor	ceRNA	SYNCRIP	23	15	5	0.479026	0.669341	6.75437	1.43457e-11	0.000163771	RPS6KB1;SMAD1;SMAD4;SMAD5;TGFBR1
1696	ctcf: first multivalent nuclear factor	ceRNA	TAF4	23	15	5	0.479026	0.669341	6.75437	1.43457e-11	0.000163771	CTCF;PTEN;RPS6KB1;SMAD1;SMAD5
1697	ctcf: first multivalent nuclear factor	ceRNA	TCF4	23	15	9	0.479026	0.669341	12.7304	4.00781e-37	4.57533e-30	CTCF;PIK3R1;PTEN;RPS6KB1;SMAD1;SMAD6;TGFB2;TGFBR1;TGFBR2
1698	ctcf: first multivalent nuclear factor	ceRNA	TNPO1	23	15	5	0.479026	0.669341	6.75437	1.43457e-11	0.000163771	CTCF;PTEN;RPS6KB1;SMAD1;SMAD5
1699	ctcf: first multivalent nuclear factor	ceRNA	TSHZ3	23	15	5	0.479026	0.669341	6.75437	1.43457e-11	0.000163771	CTCF;PIK3CA;PTEN;TGFB2;TGFBR2
1700	ctcf: first multivalent nuclear factor	ceRNA	WDR47	23	15	5	0.479026	0.669341	6.75437	1.43457e-11	0.000163771	CTCF;PTEN;RPS6KB1;SMAD1;SMAD5
1701	ctcf: first multivalent nuclear factor	ceRNA	YTHDF3	23	15	7	0.479026	0.669341	9.74238	1.98842e-22	2.26999e-15	CTCF;PTEN;RPS6KB1;SMAD1;SMAD4;TGFBR1;TGFBR2
1702	ctcf: first multivalent nuclear factor	ceRNA	ZFHX4	23	15	7	0.479026	0.669341	9.74238	1.98842e-22	2.26999e-15	CTCF;PIK3CA;PTEN;RPS6KB1;SMAD1;TGFBR1;TGFBR2
1703	ctcf: first multivalent nuclear factor	ceRNA	ZFPM2	23	15	8	0.479026	0.669341	11.2364	2.70177e-29	3.08435e-22	CTCF;PIK3R1;PTEN;RPS6KB1;SMAD5;TGFB2;TGFBR1;TGFBR2
1704	ctcf: first multivalent nuclear factor	ceRNA	ZNF148	23	15	6	0.479026	0.669341	8.24838	1.60556e-16	1.83291e-09	CTCF;PTEN;RPS6KB1;SMAD1;SMAD4;SMAD5
1705	cxcr4 signaling pathway	ceRNA	ACVR1	11	8	2	0.0838961	0.287171	6.67235	2.51739e-11	0.000287386	CXCL12;PIK3CA
1706	cxcr4 signaling pathway	ceRNA	AFF4	11	8	2	0.0838961	0.287171	6.67235	2.51739e-11	0.000287386	GNAI1;PIK3R1
1707	cxcr4 signaling pathway	ceRNA	ANK2	11	8	2	0.0838961	0.287171	6.67235	2.51739e-11	0.000287386	GNAI1;GNB1
1708	cxcr4 signaling pathway	ceRNA	ARID5B	11	8	3	0.0838961	0.287171	10.1546	3.16104e-24	3.60865e-17	CXCL12;PIK3CA;PIK3R1
1709	cxcr4 signaling pathway	ceRNA	ASAP1	11	8	2	0.0838961	0.287171	6.67235	2.51739e-11	0.000287386	PIK3CA;PLCG1
1710	cxcr4 signaling pathway	ceRNA	ATXN1	11	8	2	0.0838961	0.287171	6.67235	2.51739e-11	0.000287386	CXCL12;GNAI1
1711	cxcr4 signaling pathway	ceRNA	BHLHE41	11	8	2	0.0838961	0.287171	6.67235	2.51739e-11	0.000287386	GNAI1;PIK3R1
1712	cxcr4 signaling pathway	ceRNA	BNC2	11	8	4	0.0838961	0.287171	13.6368	2.41946e-42	2.76206e-35	CXCL12;GNAI1;PIK3CA;PIK3R1
1713	cxcr4 signaling pathway	ceRNA	C5orf24	11	8	2	0.0838961	0.287171	6.67235	2.51739e-11	0.000287386	GNB1;PIK3CA
1714	cxcr4 signaling pathway	ceRNA	CAND1	11	8	2	0.0838961	0.287171	6.67235	2.51739e-11	0.000287386	GNB1;PIK3CA
1715	cxcr4 signaling pathway	ceRNA	CCDC88A	11	8	2	0.0838961	0.287171	6.67235	2.51739e-11	0.000287386	GNAI1;PIK3CA
1716	cxcr4 signaling pathway	ceRNA	CELF2	11	8	2	0.0838961	0.287171	6.67235	2.51739e-11	0.000287386	GNAI1;PIK3R1
1717	cxcr4 signaling pathway	ceRNA	CPEB4	11	8	3	0.0838961	0.287171	10.1546	3.16104e-24	3.60865e-17	CXCL12;GNB1;PIK3CA
1718	cxcr4 signaling pathway	ceRNA	CREBRF	11	8	4	0.0838961	0.287171	13.6368	2.41946e-42	2.76206e-35	CXCL12;GNAI1;GNB1;PIK3R1
1719	cxcr4 signaling pathway	ceRNA	DDX3X	11	8	2	0.0838961	0.287171	6.67235	2.51739e-11	0.000287386	GNAQ;PIK3CA
1720	cxcr4 signaling pathway	ceRNA	EIF2C1	11	8	2	0.0838961	0.287171	6.67235	2.51739e-11	0.000287386	GNB1;PIK3CA
1721	cxcr4 signaling pathway	ceRNA	ELK3	11	8	2	0.0838961	0.287171	6.67235	2.51739e-11	0.000287386	CXCL12;GNAI1
1722	cxcr4 signaling pathway	ceRNA	FAT3	11	8	2	0.0838961	0.287171	6.67235	2.51739e-11	0.000287386	CXCL12;GNB1
1723	cxcr4 signaling pathway	ceRNA	FERMT2	11	8	2	0.0838961	0.287171	6.67235	2.51739e-11	0.000287386	CXCL12;GNAI1
1724	cxcr4 signaling pathway	ceRNA	FOXJ3	11	8	2	0.0838961	0.287171	6.67235	2.51739e-11	0.000287386	GNB1;PIK3R1
1725	cxcr4 signaling pathway	ceRNA	FOXO1	11	8	3	0.0838961	0.287171	10.1546	3.16104e-24	3.60865e-17	GNAI1;GNB1;PIK3R1
1726	cxcr4 signaling pathway	ceRNA	FOXP1	11	8	2	0.0838961	0.287171	6.67235	2.51739e-11	0.000287386	PIK3CA;PIK3R1
1727	cxcr4 signaling pathway	ceRNA	FOXP2	11	8	2	0.0838961	0.287171	6.67235	2.51739e-11	0.000287386	GNAI1;GNB1
1728	cxcr4 signaling pathway	ceRNA	HIPK3	11	8	2	0.0838961	0.287171	6.67235	2.51739e-11	0.000287386	GNAI1;PIK3CA
1729	cxcr4 signaling pathway	ceRNA	HP1BP3	11	8	2	0.0838961	0.287171	6.67235	2.51739e-11	0.000287386	GNB1;PIK3CA
1730	cxcr4 signaling pathway	ceRNA	KLF6	11	8	2	0.0838961	0.287171	6.67235	2.51739e-11	0.000287386	CXCL12;GNAI1
1731	cxcr4 signaling pathway	ceRNA	KLHL15	11	8	2	0.0838961	0.287171	6.67235	2.51739e-11	0.000287386	GNB1;PIK3CA
1732	cxcr4 signaling pathway	ceRNA	LATS2	11	8	2	0.0838961	0.287171	6.67235	2.51739e-11	0.000287386	CXCL12;PIK3CA
1733	cxcr4 signaling pathway	ceRNA	LCOR	11	8	2	0.0838961	0.287171	6.67235	2.51739e-11	0.000287386	CXCL12;GNB1
1734	cxcr4 signaling pathway	ceRNA	LHFP	11	8	2	0.0838961	0.287171	6.67235	2.51739e-11	0.000287386	GNAI1;PIK3R1
1735	cxcr4 signaling pathway	ceRNA	LRCH1	11	8	2	0.0838961	0.287171	6.67235	2.51739e-11	0.000287386	GNAI1;GNB1
1736	cxcr4 signaling pathway	ceRNA	MEF2A	11	8	2	0.0838961	0.287171	6.67235	2.51739e-11	0.000287386	GNAI1;PIK3CA
1737	cxcr4 signaling pathway	ceRNA	MEX3B	11	8	2	0.0838961	0.287171	6.67235	2.51739e-11	0.000287386	GNAI1;GNB1
1738	cxcr4 signaling pathway	ceRNA	MIER3	11	8	2	0.0838961	0.287171	6.67235	2.51739e-11	0.000287386	GNB1;PIK3CA
1739	cxcr4 signaling pathway	ceRNA	NAV3	11	8	2	0.0838961	0.287171	6.67235	2.51739e-11	0.000287386	GNAI1;PIK3R1
1740	cxcr4 signaling pathway	ceRNA	NFIB	11	8	3	0.0838961	0.287171	10.1546	3.16104e-24	3.60865e-17	GNAI1;PIK3CA;PIK3R1
1741	cxcr4 signaling pathway	ceRNA	PCDH7	11	8	2	0.0838961	0.287171	6.67235	2.51739e-11	0.000287386	GNAI1;GNB1
1742	cxcr4 signaling pathway	ceRNA	PTPRG	11	8	2	0.0838961	0.287171	6.67235	2.51739e-11	0.000287386	CXCL12;PIK3CA
1743	cxcr4 signaling pathway	ceRNA	RBMS1	11	8	2	0.0838961	0.287171	6.67235	2.51739e-11	0.000287386	GNAI1;PIK3R1
1744	cxcr4 signaling pathway	ceRNA	RUNX2	11	8	2	0.0838961	0.287171	6.67235	2.51739e-11	0.000287386	CXCL12;GNAI1
1745	cxcr4 signaling pathway	ceRNA	SALL1	11	8	2	0.0838961	0.287171	6.67235	2.51739e-11	0.000287386	GNB1;PIK3R1
1746	cxcr4 signaling pathway	ceRNA	SATB1	11	8	2	0.0838961	0.287171	6.67235	2.51739e-11	0.000287386	CXCL12;GNAI1
1747	cxcr4 signaling pathway	ceRNA	SCN3A	11	8	2	0.0838961	0.287171	6.67235	2.51739e-11	0.000287386	GNAI1;PIK3R1
1748	cxcr4 signaling pathway	ceRNA	SEMA6D	11	8	2	0.0838961	0.287171	6.67235	2.51739e-11	0.000287386	GNAQ;GNB1
1749	cxcr4 signaling pathway	ceRNA	SOCS5	11	8	2	0.0838961	0.287171	6.67235	2.51739e-11	0.000287386	GNAI1;GNB1
1750	cxcr4 signaling pathway	ceRNA	TCF4	11	8	3	0.0838961	0.287171	10.1546	3.16104e-24	3.60865e-17	GNAI1;GNB1;PIK3R1
1751	cxcr4 signaling pathway	ceRNA	TGFBR2	11	8	4	0.0838961	0.287171	13.6368	2.41946e-42	2.76206e-35	CXCL12;GNAI1;PIK3CA;PIK3R1
1752	cxcr4 signaling pathway	ceRNA	TLE4	11	8	2	0.0838961	0.287171	6.67235	2.51739e-11	0.000287386	GNAI1;PIK3R1
1753	cxcr4 signaling pathway	ceRNA	TNPO1	11	8	2	0.0838961	0.287171	6.67235	2.51739e-11	0.000287386	GNAQ;GNB1
1754	cxcr4 signaling pathway	ceRNA	TOX	11	8	2	0.0838961	0.287171	6.67235	2.51739e-11	0.000287386	CXCL12;CXCR4
1755	cxcr4 signaling pathway	ceRNA	TSHZ3	11	8	2	0.0838961	0.287171	6.67235	2.51739e-11	0.000287386	GNAI1;PIK3CA
1756	cxcr4 signaling pathway	ceRNA	ZEB2	11	8	3	0.0838961	0.287171	10.1546	3.16104e-24	3.60865e-17	CXCL12;GNAI1;GNB1
1757	cxcr4 signaling pathway	ceRNA	ZFHX4	11	8	2	0.0838961	0.287171	6.67235	2.51739e-11	0.000287386	CXCR4;PIK3CA
1758	cxcr4 signaling pathway	ceRNA	ZFPM2	11	8	4	0.0838961	0.287171	13.6368	2.41946e-42	2.76206e-35	CXCL12;GNAI1;GNB1;PIK3R1
1759	cyclin e destruction pathway	ceRNA	ALCAM	9	9	2	0.0597503	0.242608	7.99747	1.27002e-15	1.44986e-08	FBXW7;SKP1
1760	cyclin e destruction pathway	ceRNA	ARIH1	9	9	2	0.0597503	0.242608	7.99747	1.27002e-15	1.44986e-08	CUL1;FBXW7
1761	cyclin e destruction pathway	ceRNA	CBFB	9	9	2	0.0597503	0.242608	7.99747	1.27002e-15	1.44986e-08	FBXW7;TFDP1
1762	cyclin e destruction pathway	ceRNA	CDK17	9	9	3	0.0597503	0.242608	12.1193	8.3469e-34	9.52885e-27	FBXW7;SKP1;TFDP1
1763	cyclin e destruction pathway	ceRNA	CELF2	9	9	2	0.0597503	0.242608	7.99747	1.27002e-15	1.44986e-08	FBXW7;RB1
1764	cyclin e destruction pathway	ceRNA	CIT	9	9	2	0.0597503	0.242608	7.99747	1.27002e-15	1.44986e-08	CDK2;E2F1
1765	cyclin e destruction pathway	ceRNA	CNOT6	9	9	2	0.0597503	0.242608	7.99747	1.27002e-15	1.44986e-08	CDK2;SKP1
1766	cyclin e destruction pathway	ceRNA	CPEB3	9	9	3	0.0597503	0.242608	12.1193	8.3469e-34	9.52885e-27	FBXW7;RB1;TFDP1
1767	cyclin e destruction pathway	ceRNA	DYRK1A	9	9	2	0.0597503	0.242608	7.99747	1.27002e-15	1.44986e-08	RB1;TFDP1
1768	cyclin e destruction pathway	ceRNA	E2F7	9	9	2	0.0597503	0.242608	7.99747	1.27002e-15	1.44986e-08	CCNE1;CDK2
1769	cyclin e destruction pathway	ceRNA	FBXL17	9	9	2	0.0597503	0.242608	7.99747	1.27002e-15	1.44986e-08	FBXW7;SKP1
1770	cyclin e destruction pathway	ceRNA	KIF23	9	9	2	0.0597503	0.242608	7.99747	1.27002e-15	1.44986e-08	CCNE1;E2F1
1771	cyclin e destruction pathway	ceRNA	MED13	9	9	2	0.0597503	0.242608	7.99747	1.27002e-15	1.44986e-08	FBXW7;RB1
1772	cyclin e destruction pathway	ceRNA	MTF2	9	9	2	0.0597503	0.242608	7.99747	1.27002e-15	1.44986e-08	FBXW7;TFDP1
1773	cyclin e destruction pathway	ceRNA	PDIK1L	9	9	2	0.0597503	0.242608	7.99747	1.27002e-15	1.44986e-08	CDK2;SKP1
1774	cyclin e destruction pathway	ceRNA	PHF6	9	9	2	0.0597503	0.242608	7.99747	1.27002e-15	1.44986e-08	CDK2;RB1
1775	cyclin e destruction pathway	ceRNA	PTEN	9	9	2	0.0597503	0.242608	7.99747	1.27002e-15	1.44986e-08	FBXW7;RB1
1776	cyclin e destruction pathway	ceRNA	RICTOR	9	9	2	0.0597503	0.242608	7.99747	1.27002e-15	1.44986e-08	FBXW7;RB1
1777	cyclin e destruction pathway	ceRNA	SYNCRIP	9	9	2	0.0597503	0.242608	7.99747	1.27002e-15	1.44986e-08	RB1;TFDP1
1778	cyclin e destruction pathway	ceRNA	TNPO1	9	9	2	0.0597503	0.242608	7.99747	1.27002e-15	1.44986e-08	FBXW7;SKP1
1779	cyclin e destruction pathway	ceRNA	WDFY3	9	9	2	0.0597503	0.242608	7.99747	1.27002e-15	1.44986e-08	RB1;TFDP1
1780	cyclins and cell cycle regulation	ceRNA	BCL11A	23	14	3	0.110293	0.328888	8.78629	1.5458e-18	1.76469e-11	CCND1;CCND2;CDKN1B
1781	cyclins and cell cycle regulation	ceRNA	CDK17	23	14	3	0.110293	0.328888	8.78629	1.5458e-18	1.76469e-11	CCND1;CDKN1B;TFDP1
1782	cyclins and cell cycle regulation	ceRNA	CDV3	23	14	3	0.110293	0.328888	8.78629	1.5458e-18	1.76469e-11	CDC25A;CDK2;RBL1
1783	cyclins and cell cycle regulation	ceRNA	CHEK1	23	14	3	0.110293	0.328888	8.78629	1.5458e-18	1.76469e-11	CCND1;CCNE1;CDC25A
1784	cyclins and cell cycle regulation	ceRNA	CPEB3	23	14	3	0.110293	0.328888	8.78629	1.5458e-18	1.76469e-11	CCND1;RB1;TFDP1
1785	cyclins and cell cycle regulation	ceRNA	CREBRF	23	14	3	0.110293	0.328888	8.78629	1.5458e-18	1.76469e-11	CDK6;RB1;RBL1
1786	cyclins and cell cycle regulation	ceRNA	DLC1	23	14	3	0.110293	0.328888	8.78629	1.5458e-18	1.76469e-11	CCND2;CDK6;RB1
1787	cyclins and cell cycle regulation	ceRNA	FRS2	23	14	4	0.110293	0.328888	11.8268	2.83754e-32	3.23934e-25	CCND1;CDK6;CDKN1B;RB1
1788	cyclins and cell cycle regulation	ceRNA	IGF1	23	14	3	0.110293	0.328888	8.78629	1.5458e-18	1.76469e-11	CCND1;CCND2;CDK6
1789	cyclins and cell cycle regulation	ceRNA	IGF2BP3	23	14	3	0.110293	0.328888	8.78629	1.5458e-18	1.76469e-11	CCND1;CCND2;CDK6
1790	cyclins and cell cycle regulation	ceRNA	KIF23	23	14	3	0.110293	0.328888	8.78629	1.5458e-18	1.76469e-11	CCNE1;CDC25A;E2F1
1791	cyclins and cell cycle regulation	ceRNA	LRIG1	23	14	3	0.110293	0.328888	8.78629	1.5458e-18	1.76469e-11	CCND1;CCND2;RB1
1792	cyclins and cell cycle regulation	ceRNA	MOB3B	23	14	3	0.110293	0.328888	8.78629	1.5458e-18	1.76469e-11	CCND2;CCNE1;CDC25A
1793	cyclins and cell cycle regulation	ceRNA	PCDH19	23	14	3	0.110293	0.328888	8.78629	1.5458e-18	1.76469e-11	CCND1;CCND2;CDK6
1794	cyclins and cell cycle regulation	ceRNA	TBC1D9	23	14	3	0.110293	0.328888	8.78629	1.5458e-18	1.76469e-11	CCND1;CDC25A;RB1
1795	cyclins and cell cycle regulation	ceRNA	WDFY3	23	14	3	0.110293	0.328888	8.78629	1.5458e-18	1.76469e-11	CCND1;RB1;TFDP1
1796	cyclins and cell cycle regulation	ceRNA	ZFPM2	23	14	3	0.110293	0.328888	8.78629	1.5458e-18	1.76469e-11	CCND2;CDK6;RB1
1797	cyclins and cell cycle regulation	ceRNA	ZNF367	23	14	3	0.110293	0.328888	8.78629	1.5458e-18	1.76469e-11	CCND1;CDC25A;CDK2
1798	cystic fibrosis transmembrane conductance regulator (cftr) and beta 2 adrenergic receptor (b2ar) pathway	ceRNA	ABI1	20	9	2	0.0931042	0.301979	6.31466	2.70756e-10	0.00309096	CXCL12;PRKAR1A
1799	cystic fibrosis transmembrane conductance regulator (cftr) and beta 2 adrenergic receptor (b2ar) pathway	ceRNA	ARHGAP20	20	9	2	0.0931042	0.301979	6.31466	2.70756e-10	0.00309096	ADRB2;PRKACB
1800	cystic fibrosis transmembrane conductance regulator (cftr) and beta 2 adrenergic receptor (b2ar) pathway	ceRNA	ARID5B	20	9	3	0.0931042	0.301979	9.62615	6.20094e-22	7.07901e-15	CXCL12;EDN1;PRKAR1A
1801	cystic fibrosis transmembrane conductance regulator (cftr) and beta 2 adrenergic receptor (b2ar) pathway	ceRNA	ATXN1	20	9	2	0.0931042	0.301979	6.31466	2.70756e-10	0.00309096	CXCL12;PRKAR1A
1802	cystic fibrosis transmembrane conductance regulator (cftr) and beta 2 adrenergic receptor (b2ar) pathway	ceRNA	BCL11A	20	9	2	0.0931042	0.301979	6.31466	2.70756e-10	0.00309096	CXCL12;PRKAR1A
1803	cystic fibrosis transmembrane conductance regulator (cftr) and beta 2 adrenergic receptor (b2ar) pathway	ceRNA	BNC2	20	9	3	0.0931042	0.301979	9.62615	6.20094e-22	7.07901e-15	CXCL12;PRKACB;PRKAR1A
1804	cystic fibrosis transmembrane conductance regulator (cftr) and beta 2 adrenergic receptor (b2ar) pathway	ceRNA	CAND1	20	9	2	0.0931042	0.301979	6.31466	2.70756e-10	0.00309096	GNB1;PRKAR1A
1805	cystic fibrosis transmembrane conductance regulator (cftr) and beta 2 adrenergic receptor (b2ar) pathway	ceRNA	CCDC71L	20	9	2	0.0931042	0.301979	6.31466	2.70756e-10	0.00309096	EDN1;PRKACB
1806	cystic fibrosis transmembrane conductance regulator (cftr) and beta 2 adrenergic receptor (b2ar) pathway	ceRNA	CCND2	20	9	2	0.0931042	0.301979	6.31466	2.70756e-10	0.00309096	ADRB2;PRKACB
1807	cystic fibrosis transmembrane conductance regulator (cftr) and beta 2 adrenergic receptor (b2ar) pathway	ceRNA	CDK17	20	9	2	0.0931042	0.301979	6.31466	2.70756e-10	0.00309096	GNB1;PRKACB
1808	cystic fibrosis transmembrane conductance regulator (cftr) and beta 2 adrenergic receptor (b2ar) pathway	ceRNA	CELF2	20	9	2	0.0931042	0.301979	6.31466	2.70756e-10	0.00309096	PRKACB;PRKAR1A
1809	cystic fibrosis transmembrane conductance regulator (cftr) and beta 2 adrenergic receptor (b2ar) pathway	ceRNA	CHD9	20	9	2	0.0931042	0.301979	6.31466	2.70756e-10	0.00309096	PRKACB;PRKAR1A
1810	cystic fibrosis transmembrane conductance regulator (cftr) and beta 2 adrenergic receptor (b2ar) pathway	ceRNA	CPEB2	20	9	3	0.0931042	0.301979	9.62615	6.20094e-22	7.07901e-15	GNB1;PRKACB;PRKAR2B
1811	cystic fibrosis transmembrane conductance regulator (cftr) and beta 2 adrenergic receptor (b2ar) pathway	ceRNA	CPEB4	20	9	3	0.0931042	0.301979	9.62615	6.20094e-22	7.07901e-15	CXCL12;GNB1;PRKACB
1812	cystic fibrosis transmembrane conductance regulator (cftr) and beta 2 adrenergic receptor (b2ar) pathway	ceRNA	CREB5	20	9	2	0.0931042	0.301979	6.31466	2.70756e-10	0.00309096	EDN1;PRKACB
1813	cystic fibrosis transmembrane conductance regulator (cftr) and beta 2 adrenergic receptor (b2ar) pathway	ceRNA	CREBRF	20	9	3	0.0931042	0.301979	9.62615	6.20094e-22	7.07901e-15	CXCL12;GNB1;PRKAR1A
1814	cystic fibrosis transmembrane conductance regulator (cftr) and beta 2 adrenergic receptor (b2ar) pathway	ceRNA	CTDSPL2	20	9	2	0.0931042	0.301979	6.31466	2.70756e-10	0.00309096	GNB1;PRKAR1A
1815	cystic fibrosis transmembrane conductance regulator (cftr) and beta 2 adrenergic receptor (b2ar) pathway	ceRNA	DCLK1	20	9	2	0.0931042	0.301979	6.31466	2.70756e-10	0.00309096	CXCL12;PRKAR1A
1816	cystic fibrosis transmembrane conductance regulator (cftr) and beta 2 adrenergic receptor (b2ar) pathway	ceRNA	DMD	20	9	2	0.0931042	0.301979	6.31466	2.70756e-10	0.00309096	ADRB2;EDN1
1817	cystic fibrosis transmembrane conductance regulator (cftr) and beta 2 adrenergic receptor (b2ar) pathway	ceRNA	DOCK7	20	9	2	0.0931042	0.301979	6.31466	2.70756e-10	0.00309096	PRKACB;PRKAR1A
1818	cystic fibrosis transmembrane conductance regulator (cftr) and beta 2 adrenergic receptor (b2ar) pathway	ceRNA	DYNC1LI2	20	9	2	0.0931042	0.301979	6.31466	2.70756e-10	0.00309096	GNB1;PRKACB
1819	cystic fibrosis transmembrane conductance regulator (cftr) and beta 2 adrenergic receptor (b2ar) pathway	ceRNA	DYRK2	20	9	2	0.0931042	0.301979	6.31466	2.70756e-10	0.00309096	PRKACB;PRKAR1A
1820	cystic fibrosis transmembrane conductance regulator (cftr) and beta 2 adrenergic receptor (b2ar) pathway	ceRNA	ELK3	20	9	2	0.0931042	0.301979	6.31466	2.70756e-10	0.00309096	CXCL12;PRKACB
1821	cystic fibrosis transmembrane conductance regulator (cftr) and beta 2 adrenergic receptor (b2ar) pathway	ceRNA	ERBB4	20	9	2	0.0931042	0.301979	6.31466	2.70756e-10	0.00309096	CXCL12;EDN1
1822	cystic fibrosis transmembrane conductance regulator (cftr) and beta 2 adrenergic receptor (b2ar) pathway	ceRNA	FAM91A1	20	9	2	0.0931042	0.301979	6.31466	2.70756e-10	0.00309096	GNB1;PRKAR2A
1823	cystic fibrosis transmembrane conductance regulator (cftr) and beta 2 adrenergic receptor (b2ar) pathway	ceRNA	FAT3	20	9	3	0.0931042	0.301979	9.62615	6.20094e-22	7.07901e-15	CXCL12;GNB1;PRKACB
1824	cystic fibrosis transmembrane conductance regulator (cftr) and beta 2 adrenergic receptor (b2ar) pathway	ceRNA	FNDC3B	20	9	2	0.0931042	0.301979	6.31466	2.70756e-10	0.00309096	PRKACB;PRKAR1A
1825	cystic fibrosis transmembrane conductance regulator (cftr) and beta 2 adrenergic receptor (b2ar) pathway	ceRNA	FOXO1	20	9	2	0.0931042	0.301979	6.31466	2.70756e-10	0.00309096	ADRB2;GNB1
1826	cystic fibrosis transmembrane conductance regulator (cftr) and beta 2 adrenergic receptor (b2ar) pathway	ceRNA	FOXP2	20	9	2	0.0931042	0.301979	6.31466	2.70756e-10	0.00309096	GNB1;PRKACB
1827	cystic fibrosis transmembrane conductance regulator (cftr) and beta 2 adrenergic receptor (b2ar) pathway	ceRNA	GJA1	20	9	2	0.0931042	0.301979	6.31466	2.70756e-10	0.00309096	CXCL12;EDN1
1828	cystic fibrosis transmembrane conductance regulator (cftr) and beta 2 adrenergic receptor (b2ar) pathway	ceRNA	IGF2BP2	20	9	2	0.0931042	0.301979	6.31466	2.70756e-10	0.00309096	GNAS;PRKACB
1829	cystic fibrosis transmembrane conductance regulator (cftr) and beta 2 adrenergic receptor (b2ar) pathway	ceRNA	KBTBD8	20	9	2	0.0931042	0.301979	6.31466	2.70756e-10	0.00309096	CXCL12;PRKACB
1830	cystic fibrosis transmembrane conductance regulator (cftr) and beta 2 adrenergic receptor (b2ar) pathway	ceRNA	KLF6	20	9	2	0.0931042	0.301979	6.31466	2.70756e-10	0.00309096	CXCL12;PRKACB
1831	cystic fibrosis transmembrane conductance regulator (cftr) and beta 2 adrenergic receptor (b2ar) pathway	ceRNA	LCOR	20	9	3	0.0931042	0.301979	9.62615	6.20094e-22	7.07901e-15	CXCL12;GNB1;PRKAR1A
1832	cystic fibrosis transmembrane conductance regulator (cftr) and beta 2 adrenergic receptor (b2ar) pathway	ceRNA	LRCH1	20	9	2	0.0931042	0.301979	6.31466	2.70756e-10	0.00309096	GNB1;PRKACB
1833	cystic fibrosis transmembrane conductance regulator (cftr) and beta 2 adrenergic receptor (b2ar) pathway	ceRNA	LRCH2	20	9	2	0.0931042	0.301979	6.31466	2.70756e-10	0.00309096	CXCL12;PRKACB
1834	cystic fibrosis transmembrane conductance regulator (cftr) and beta 2 adrenergic receptor (b2ar) pathway	ceRNA	MAP3K1	20	9	2	0.0931042	0.301979	6.31466	2.70756e-10	0.00309096	GNB1;PRKAR1A
1835	cystic fibrosis transmembrane conductance regulator (cftr) and beta 2 adrenergic receptor (b2ar) pathway	ceRNA	MBNL1	20	9	2	0.0931042	0.301979	6.31466	2.70756e-10	0.00309096	CXCL12;PRKACB
1836	cystic fibrosis transmembrane conductance regulator (cftr) and beta 2 adrenergic receptor (b2ar) pathway	ceRNA	MET	20	9	3	0.0931042	0.301979	9.62615	6.20094e-22	7.07901e-15	CXCL12;EDN1;PRKACB
1837	cystic fibrosis transmembrane conductance regulator (cftr) and beta 2 adrenergic receptor (b2ar) pathway	ceRNA	MEX3B	20	9	2	0.0931042	0.301979	6.31466	2.70756e-10	0.00309096	GNB1;PRKACB
1838	cystic fibrosis transmembrane conductance regulator (cftr) and beta 2 adrenergic receptor (b2ar) pathway	ceRNA	MIER3	20	9	2	0.0931042	0.301979	6.31466	2.70756e-10	0.00309096	GNB1;PRKAR2B
1839	cystic fibrosis transmembrane conductance regulator (cftr) and beta 2 adrenergic receptor (b2ar) pathway	ceRNA	NRP2	20	9	2	0.0931042	0.301979	6.31466	2.70756e-10	0.00309096	GNB1;PRKAR1A
1840	cystic fibrosis transmembrane conductance regulator (cftr) and beta 2 adrenergic receptor (b2ar) pathway	ceRNA	PAFAH1B2	20	9	2	0.0931042	0.301979	6.31466	2.70756e-10	0.00309096	PRKAR1A;PRKAR2A
1841	cystic fibrosis transmembrane conductance regulator (cftr) and beta 2 adrenergic receptor (b2ar) pathway	ceRNA	PDGFRA	20	9	2	0.0931042	0.301979	6.31466	2.70756e-10	0.00309096	EDN1;PRKACB
1842	cystic fibrosis transmembrane conductance regulator (cftr) and beta 2 adrenergic receptor (b2ar) pathway	ceRNA	PTEN	20	9	2	0.0931042	0.301979	6.31466	2.70756e-10	0.00309096	PRKACB;PRKAR1A
1843	cystic fibrosis transmembrane conductance regulator (cftr) and beta 2 adrenergic receptor (b2ar) pathway	ceRNA	RAB8B	20	9	2	0.0931042	0.301979	6.31466	2.70756e-10	0.00309096	ADRB2;PRKACB
1844	cystic fibrosis transmembrane conductance regulator (cftr) and beta 2 adrenergic receptor (b2ar) pathway	ceRNA	RAPGEF2	20	9	2	0.0931042	0.301979	6.31466	2.70756e-10	0.00309096	CXCL12;PRKAR1A
1845	cystic fibrosis transmembrane conductance regulator (cftr) and beta 2 adrenergic receptor (b2ar) pathway	ceRNA	RBL2	20	9	2	0.0931042	0.301979	6.31466	2.70756e-10	0.00309096	PRKACB;PRKAR1A
1846	cystic fibrosis transmembrane conductance regulator (cftr) and beta 2 adrenergic receptor (b2ar) pathway	ceRNA	RRAGD	20	9	2	0.0931042	0.301979	6.31466	2.70756e-10	0.00309096	CXCL12;PRKACB
1847	cystic fibrosis transmembrane conductance regulator (cftr) and beta 2 adrenergic receptor (b2ar) pathway	ceRNA	SEMA6D	20	9	2	0.0931042	0.301979	6.31466	2.70756e-10	0.00309096	GNB1;PRKAR1A
1848	cystic fibrosis transmembrane conductance regulator (cftr) and beta 2 adrenergic receptor (b2ar) pathway	ceRNA	TCF4	20	9	2	0.0931042	0.301979	6.31466	2.70756e-10	0.00309096	GNB1;PRKACB
1849	cystic fibrosis transmembrane conductance regulator (cftr) and beta 2 adrenergic receptor (b2ar) pathway	ceRNA	TET3	20	9	2	0.0931042	0.301979	6.31466	2.70756e-10	0.00309096	GNB1;PRKACB
1850	cystic fibrosis transmembrane conductance regulator (cftr) and beta 2 adrenergic receptor (b2ar) pathway	ceRNA	TGFBR2	20	9	2	0.0931042	0.301979	6.31466	2.70756e-10	0.00309096	CXCL12;PRKACB
1851	cystic fibrosis transmembrane conductance regulator (cftr) and beta 2 adrenergic receptor (b2ar) pathway	ceRNA	TOX	20	9	2	0.0931042	0.301979	6.31466	2.70756e-10	0.00309096	CXCL12;PRKACB
1852	cystic fibrosis transmembrane conductance regulator (cftr) and beta 2 adrenergic receptor (b2ar) pathway	ceRNA	UBE2D3	20	9	2	0.0931042	0.301979	6.31466	2.70756e-10	0.00309096	GNB1;PRKAR1A
1853	cystic fibrosis transmembrane conductance regulator (cftr) and beta 2 adrenergic receptor (b2ar) pathway	ceRNA	UTRN	20	9	2	0.0931042	0.301979	6.31466	2.70756e-10	0.00309096	ADRB2;PRKACB
1854	cystic fibrosis transmembrane conductance regulator (cftr) and beta 2 adrenergic receptor (b2ar) pathway	ceRNA	WAPAL	20	9	2	0.0931042	0.301979	6.31466	2.70756e-10	0.00309096	PRKACB;PRKAR1A
1855	cystic fibrosis transmembrane conductance regulator (cftr) and beta 2 adrenergic receptor (b2ar) pathway	ceRNA	ZC3H12C	20	9	2	0.0931042	0.301979	6.31466	2.70756e-10	0.00309096	PRKACB;PRKAR1A
1856	cystic fibrosis transmembrane conductance regulator (cftr) and beta 2 adrenergic receptor (b2ar) pathway	ceRNA	ZCCHC24	20	9	2	0.0931042	0.301979	6.31466	2.70756e-10	0.00309096	CXCL12;PRKACB
1857	cystic fibrosis transmembrane conductance regulator (cftr) and beta 2 adrenergic receptor (b2ar) pathway	ceRNA	ZEB1	20	9	2	0.0931042	0.301979	6.31466	2.70756e-10	0.00309096	CXCL12;PRKACB
1858	cystic fibrosis transmembrane conductance regulator (cftr) and beta 2 adrenergic receptor (b2ar) pathway	ceRNA	ZEB2	20	9	4	0.0931042	0.301979	12.9376	2.76121e-38	3.15221e-31	CXCL12;GNB1;PRKACB;PRKAR1A
1859	cystic fibrosis transmembrane conductance regulator (cftr) and beta 2 adrenergic receptor (b2ar) pathway	ceRNA	ZFPM2	20	9	3	0.0931042	0.301979	9.62615	6.20094e-22	7.07901e-15	CXCL12;GNB1;PRKACB
1860	cystic fibrosis transmembrane conductance regulator (cftr) and beta 2 adrenergic receptor (b2ar) pathway	ceRNA	ZNF148	20	9	2	0.0931042	0.301979	6.31466	2.70756e-10	0.00309096	GNB1;PRKAR1A
1861	double stranded rna induced gene expression	ceRNA	ABI1	15	6	2	0.0804175	0.277876	6.90804	4.91395e-12	5.60978e-05	CHUK;MAP4K4
1862	double stranded rna induced gene expression	ceRNA	CALU	15	6	2	0.0804175	0.277876	6.90804	4.91395e-12	5.60978e-05	EIF2S2;MAP4K4
1863	double stranded rna induced gene expression	ceRNA	DYRK2	15	6	2	0.0804175	0.277876	6.90804	4.91395e-12	5.60978e-05	CHUK;MAP4K4
1864	double stranded rna induced gene expression	ceRNA	FNDC3B	15	6	2	0.0804175	0.277876	6.90804	4.91395e-12	5.60978e-05	EIF2S2;MAP4K4
1865	double stranded rna induced gene expression	ceRNA	INO80D	15	6	2	0.0804175	0.277876	6.90804	4.91395e-12	5.60978e-05	CHUK;MAP4K4
1866	double stranded rna induced gene expression	ceRNA	KPNA4	15	6	3	0.0804175	0.277876	10.5068	8.03746e-26	9.17559e-19	CHUK;EIF2S2;MAP4K4
1867	double stranded rna induced gene expression	ceRNA	MAPK6	15	6	2	0.0804175	0.277876	6.90804	4.91395e-12	5.60978e-05	EIF2S2;MAP4K4
1868	double stranded rna induced gene expression	ceRNA	SYNCRIP	15	6	3	0.0804175	0.277876	10.5068	8.03746e-26	9.17559e-19	CHUK;EIF2S2;MAP4K4
1869	double stranded rna induced gene expression	ceRNA	TNPO1	15	6	2	0.0804175	0.277876	6.90804	4.91395e-12	5.60978e-05	CHUK;MAP4K4
1870	double stranded rna induced gene expression	ceRNA	ZCCHC24	15	6	2	0.0804175	0.277876	6.90804	4.91395e-12	5.60978e-05	EIF2S2;MAP4K4
1871	double stranded rna induced gene expression	ceRNA	ZEB1	15	6	2	0.0804175	0.277876	6.90804	4.91395e-12	5.60978e-05	CHUK;MAP4K4
1872	double stranded rna induced gene expression	ceRNA	ZEB2	15	6	2	0.0804175	0.277876	6.90804	4.91395e-12	5.60978e-05	EIF2S2;MAP4K4
1873	double stranded rna induced gene expression	ceRNA	ZFX	15	6	2	0.0804175	0.277876	6.90804	4.91395e-12	5.60978e-05	CHUK;EIF2S2
1874	downregulated of mta-3 in er-negative breast tumors	ceRNA	ADAM23	21	6	1	0.0249642	0.156933	6.21308	5.1956e-10	0.00593131	SNAI2
1875	downregulated of mta-3 in er-negative breast tumors	ceRNA	ADAMTS3	21	6	1	0.0249642	0.156933	6.21308	5.1956e-10	0.00593131	SNAI2
1876	downregulated of mta-3 in er-negative breast tumors	ceRNA	ADAMTS6	21	6	1	0.0249642	0.156933	6.21308	5.1956e-10	0.00593131	SNAI2
1877	downregulated of mta-3 in er-negative breast tumors	ceRNA	ANP32E	21	6	1	0.0249642	0.156933	6.21308	5.1956e-10	0.00593131	SNAI2
1878	downregulated of mta-3 in er-negative breast tumors	ceRNA	ARID4A	21	6	1	0.0249642	0.156933	6.21308	5.1956e-10	0.00593131	SNAI2
1879	downregulated of mta-3 in er-negative breast tumors	ceRNA	ASPN	21	6	1	0.0249642	0.156933	6.21308	5.1956e-10	0.00593131	SNAI2
1880	downregulated of mta-3 in er-negative breast tumors	ceRNA	ATL2	21	6	1	0.0249642	0.156933	6.21308	5.1956e-10	0.00593131	ESR1
1881	downregulated of mta-3 in er-negative breast tumors	ceRNA	BACH2	21	6	1	0.0249642	0.156933	6.21308	5.1956e-10	0.00593131	SNAI2
1882	downregulated of mta-3 in er-negative breast tumors	ceRNA	BCL11A	21	6	2	0.0249642	0.156933	12.5852	2.54697e-36	2.90763e-29	ESR1;SNAI2
1883	downregulated of mta-3 in er-negative breast tumors	ceRNA	BHLHE22	21	6	1	0.0249642	0.156933	6.21308	5.1956e-10	0.00593131	SNAI2
1884	downregulated of mta-3 in er-negative breast tumors	ceRNA	CALU	21	6	1	0.0249642	0.156933	6.21308	5.1956e-10	0.00593131	SNAI2
1885	downregulated of mta-3 in er-negative breast tumors	ceRNA	CAMSAP1	21	6	1	0.0249642	0.156933	6.21308	5.1956e-10	0.00593131	TUBA1A
1886	downregulated of mta-3 in er-negative breast tumors	ceRNA	CBLN4	21	6	1	0.0249642	0.156933	6.21308	5.1956e-10	0.00593131	SNAI2
1887	downregulated of mta-3 in er-negative breast tumors	ceRNA	CCDC71L	21	6	1	0.0249642	0.156933	6.21308	5.1956e-10	0.00593131	ESR1
1888	downregulated of mta-3 in er-negative breast tumors	ceRNA	CDK17	21	6	1	0.0249642	0.156933	6.21308	5.1956e-10	0.00593131	ESR1
1889	downregulated of mta-3 in er-negative breast tumors	ceRNA	CELF2	21	6	1	0.0249642	0.156933	6.21308	5.1956e-10	0.00593131	SNAI2
1890	downregulated of mta-3 in er-negative breast tumors	ceRNA	CNKSR2	21	6	1	0.0249642	0.156933	6.21308	5.1956e-10	0.00593131	SNAI2
1891	downregulated of mta-3 in er-negative breast tumors	ceRNA	CNTN4	21	6	1	0.0249642	0.156933	6.21308	5.1956e-10	0.00593131	SNAI2
1892	downregulated of mta-3 in er-negative breast tumors	ceRNA	CPEB4	21	6	1	0.0249642	0.156933	6.21308	5.1956e-10	0.00593131	ESR1
1893	downregulated of mta-3 in er-negative breast tumors	ceRNA	CPNE8	21	6	1	0.0249642	0.156933	6.21308	5.1956e-10	0.00593131	SNAI2
1894	downregulated of mta-3 in er-negative breast tumors	ceRNA	CRISPLD1	21	6	1	0.0249642	0.156933	6.21308	5.1956e-10	0.00593131	SNAI2
1895	downregulated of mta-3 in er-negative breast tumors	ceRNA	CTTNBP2	21	6	1	0.0249642	0.156933	6.21308	5.1956e-10	0.00593131	SNAI2
1896	downregulated of mta-3 in er-negative breast tumors	ceRNA	DACT1	21	6	1	0.0249642	0.156933	6.21308	5.1956e-10	0.00593131	SNAI2
1897	downregulated of mta-3 in er-negative breast tumors	ceRNA	DCLK2	21	6	1	0.0249642	0.156933	6.21308	5.1956e-10	0.00593131	SNAI2
1898	downregulated of mta-3 in er-negative breast tumors	ceRNA	EBF1	21	6	1	0.0249642	0.156933	6.21308	5.1956e-10	0.00593131	SNAI2
1899	downregulated of mta-3 in er-negative breast tumors	ceRNA	EBF3	21	6	1	0.0249642	0.156933	6.21308	5.1956e-10	0.00593131	SNAI2
1900	downregulated of mta-3 in er-negative breast tumors	ceRNA	EGR2	21	6	1	0.0249642	0.156933	6.21308	5.1956e-10	0.00593131	SNAI2
1901	downregulated of mta-3 in er-negative breast tumors	ceRNA	ELOVL4	21	6	1	0.0249642	0.156933	6.21308	5.1956e-10	0.00593131	SNAI2
1902	downregulated of mta-3 in er-negative breast tumors	ceRNA	FAM46A	21	6	1	0.0249642	0.156933	6.21308	5.1956e-10	0.00593131	SNAI2
1903	downregulated of mta-3 in er-negative breast tumors	ceRNA	FAM49A	21	6	1	0.0249642	0.156933	6.21308	5.1956e-10	0.00593131	SNAI2
1904	downregulated of mta-3 in er-negative breast tumors	ceRNA	FIGN	21	6	1	0.0249642	0.156933	6.21308	5.1956e-10	0.00593131	SNAI2
1905	downregulated of mta-3 in er-negative breast tumors	ceRNA	FNDC3B	21	6	1	0.0249642	0.156933	6.21308	5.1956e-10	0.00593131	SNAI2
1906	downregulated of mta-3 in er-negative breast tumors	ceRNA	FOXP1	21	6	1	0.0249642	0.156933	6.21308	5.1956e-10	0.00593131	ESR1
1907	downregulated of mta-3 in er-negative breast tumors	ceRNA	FOXP2	21	6	1	0.0249642	0.156933	6.21308	5.1956e-10	0.00593131	SNAI2
1908	downregulated of mta-3 in er-negative breast tumors	ceRNA	FSTL1	21	6	1	0.0249642	0.156933	6.21308	5.1956e-10	0.00593131	SNAI2
1909	downregulated of mta-3 in er-negative breast tumors	ceRNA	GFPT2	21	6	2	0.0249642	0.156933	12.5852	2.54697e-36	2.90763e-29	SNAI1;SNAI2
1910	downregulated of mta-3 in er-negative breast tumors	ceRNA	GPR124	21	6	1	0.0249642	0.156933	6.21308	5.1956e-10	0.00593131	SNAI2
1911	downregulated of mta-3 in er-negative breast tumors	ceRNA	HECW1	21	6	1	0.0249642	0.156933	6.21308	5.1956e-10	0.00593131	SNAI2
1912	downregulated of mta-3 in er-negative breast tumors	ceRNA	HOXA3	21	6	1	0.0249642	0.156933	6.21308	5.1956e-10	0.00593131	ESR1
1913	downregulated of mta-3 in er-negative breast tumors	ceRNA	HOXC8	21	6	1	0.0249642	0.156933	6.21308	5.1956e-10	0.00593131	ESR1
1914	downregulated of mta-3 in er-negative breast tumors	ceRNA	IGF2BP2	21	6	1	0.0249642	0.156933	6.21308	5.1956e-10	0.00593131	ESR1
1915	downregulated of mta-3 in er-negative breast tumors	ceRNA	ITGA5	21	6	1	0.0249642	0.156933	6.21308	5.1956e-10	0.00593131	SNAI2
1916	downregulated of mta-3 in er-negative breast tumors	ceRNA	ITGA6	21	6	1	0.0249642	0.156933	6.21308	5.1956e-10	0.00593131	SNAI2
1917	downregulated of mta-3 in er-negative breast tumors	ceRNA	JAZF1	21	6	1	0.0249642	0.156933	6.21308	5.1956e-10	0.00593131	SNAI2
1918	downregulated of mta-3 in er-negative breast tumors	ceRNA	KBTBD8	21	6	1	0.0249642	0.156933	6.21308	5.1956e-10	0.00593131	SNAI2
1919	downregulated of mta-3 in er-negative breast tumors	ceRNA	KCNA1	21	6	1	0.0249642	0.156933	6.21308	5.1956e-10	0.00593131	SNAI2
1920	downregulated of mta-3 in er-negative breast tumors	ceRNA	KIAA1024	21	6	1	0.0249642	0.156933	6.21308	5.1956e-10	0.00593131	SNAI2
1921	downregulated of mta-3 in er-negative breast tumors	ceRNA	KPNA3	21	6	1	0.0249642	0.156933	6.21308	5.1956e-10	0.00593131	SNAI2
1922	downregulated of mta-3 in er-negative breast tumors	ceRNA	KRAS	21	6	1	0.0249642	0.156933	6.21308	5.1956e-10	0.00593131	SNAI2
1923	downregulated of mta-3 in er-negative breast tumors	ceRNA	LAMP5	21	6	1	0.0249642	0.156933	6.21308	5.1956e-10	0.00593131	ESR1
1924	downregulated of mta-3 in er-negative breast tumors	ceRNA	LPPR4	21	6	1	0.0249642	0.156933	6.21308	5.1956e-10	0.00593131	SNAI2
1925	downregulated of mta-3 in er-negative breast tumors	ceRNA	MAF	21	6	1	0.0249642	0.156933	6.21308	5.1956e-10	0.00593131	SNAI2
1926	downregulated of mta-3 in er-negative breast tumors	ceRNA	MAP4K4	21	6	1	0.0249642	0.156933	6.21308	5.1956e-10	0.00593131	SNAI2
1927	downregulated of mta-3 in er-negative breast tumors	ceRNA	MARCKS	21	6	1	0.0249642	0.156933	6.21308	5.1956e-10	0.00593131	SNAI2
1928	downregulated of mta-3 in er-negative breast tumors	ceRNA	MARK1	21	6	1	0.0249642	0.156933	6.21308	5.1956e-10	0.00593131	SNAI2
1929	downregulated of mta-3 in er-negative breast tumors	ceRNA	MECOM	21	6	1	0.0249642	0.156933	6.21308	5.1956e-10	0.00593131	SNAI2
1930	downregulated of mta-3 in er-negative breast tumors	ceRNA	MED13L	21	6	1	0.0249642	0.156933	6.21308	5.1956e-10	0.00593131	ESR1
1931	downregulated of mta-3 in er-negative breast tumors	ceRNA	MEX3B	21	6	1	0.0249642	0.156933	6.21308	5.1956e-10	0.00593131	SNAI2
1932	downregulated of mta-3 in er-negative breast tumors	ceRNA	MIER3	21	6	1	0.0249642	0.156933	6.21308	5.1956e-10	0.00593131	ESR1
1933	downregulated of mta-3 in er-negative breast tumors	ceRNA	MITF	21	6	1	0.0249642	0.156933	6.21308	5.1956e-10	0.00593131	SNAI2
1934	downregulated of mta-3 in er-negative breast tumors	ceRNA	MKL2	21	6	1	0.0249642	0.156933	6.21308	5.1956e-10	0.00593131	ESR1
1935	downregulated of mta-3 in er-negative breast tumors	ceRNA	MMD	21	6	1	0.0249642	0.156933	6.21308	5.1956e-10	0.00593131	SNAI2
1936	downregulated of mta-3 in er-negative breast tumors	ceRNA	MSRB3	21	6	1	0.0249642	0.156933	6.21308	5.1956e-10	0.00593131	SNAI2
1937	downregulated of mta-3 in er-negative breast tumors	ceRNA	MYB	21	6	2	0.0249642	0.156933	12.5852	2.54697e-36	2.90763e-29	ESR1;TUBA1A
1938	downregulated of mta-3 in er-negative breast tumors	ceRNA	MYO1B	21	6	1	0.0249642	0.156933	6.21308	5.1956e-10	0.00593131	SNAI2
1939	downregulated of mta-3 in er-negative breast tumors	ceRNA	NAV3	21	6	1	0.0249642	0.156933	6.21308	5.1956e-10	0.00593131	SNAI2
1940	downregulated of mta-3 in er-negative breast tumors	ceRNA	NEGR1	21	6	1	0.0249642	0.156933	6.21308	5.1956e-10	0.00593131	SNAI2
1941	downregulated of mta-3 in er-negative breast tumors	ceRNA	NFIB	21	6	1	0.0249642	0.156933	6.21308	5.1956e-10	0.00593131	ESR1
1942	downregulated of mta-3 in er-negative breast tumors	ceRNA	ORMDL3	21	6	1	0.0249642	0.156933	6.21308	5.1956e-10	0.00593131	ESR1
1943	downregulated of mta-3 in er-negative breast tumors	ceRNA	PALLD	21	6	1	0.0249642	0.156933	6.21308	5.1956e-10	0.00593131	SNAI2
1944	downregulated of mta-3 in er-negative breast tumors	ceRNA	PAX3	21	6	1	0.0249642	0.156933	6.21308	5.1956e-10	0.00593131	SNAI2
1945	downregulated of mta-3 in er-negative breast tumors	ceRNA	PCDH17	21	6	1	0.0249642	0.156933	6.21308	5.1956e-10	0.00593131	SNAI2
1946	downregulated of mta-3 in er-negative breast tumors	ceRNA	PCDH9	21	6	1	0.0249642	0.156933	6.21308	5.1956e-10	0.00593131	SNAI2
1947	downregulated of mta-3 in er-negative breast tumors	ceRNA	PHACTR2	21	6	1	0.0249642	0.156933	6.21308	5.1956e-10	0.00593131	SNAI2
1948	downregulated of mta-3 in er-negative breast tumors	ceRNA	PHLDB1	21	6	1	0.0249642	0.156933	6.21308	5.1956e-10	0.00593131	SNAI2
1949	downregulated of mta-3 in er-negative breast tumors	ceRNA	PPAP2B	21	6	1	0.0249642	0.156933	6.21308	5.1956e-10	0.00593131	SNAI2
1950	downregulated of mta-3 in er-negative breast tumors	ceRNA	PPM1D	21	6	1	0.0249642	0.156933	6.21308	5.1956e-10	0.00593131	TUBA1A
1951	downregulated of mta-3 in er-negative breast tumors	ceRNA	PRDM1	21	6	1	0.0249642	0.156933	6.21308	5.1956e-10	0.00593131	SNAI2
1952	downregulated of mta-3 in er-negative breast tumors	ceRNA	PRTG	21	6	1	0.0249642	0.156933	6.21308	5.1956e-10	0.00593131	SNAI2
1953	downregulated of mta-3 in er-negative breast tumors	ceRNA	RAB23	21	6	1	0.0249642	0.156933	6.21308	5.1956e-10	0.00593131	SNAI2
1954	downregulated of mta-3 in er-negative breast tumors	ceRNA	RAB5B	21	6	1	0.0249642	0.156933	6.21308	5.1956e-10	0.00593131	ESR1
1955	downregulated of mta-3 in er-negative breast tumors	ceRNA	RAB8B	21	6	1	0.0249642	0.156933	6.21308	5.1956e-10	0.00593131	SNAI2
1956	downregulated of mta-3 in er-negative breast tumors	ceRNA	RAC1	21	6	1	0.0249642	0.156933	6.21308	5.1956e-10	0.00593131	SNAI2
1957	downregulated of mta-3 in er-negative breast tumors	ceRNA	RAP2C	21	6	1	0.0249642	0.156933	6.21308	5.1956e-10	0.00593131	ESR1
1958	downregulated of mta-3 in er-negative breast tumors	ceRNA	RBM24	21	6	1	0.0249642	0.156933	6.21308	5.1956e-10	0.00593131	ESR1
1959	downregulated of mta-3 in er-negative breast tumors	ceRNA	RECK	21	6	1	0.0249642	0.156933	6.21308	5.1956e-10	0.00593131	SNAI2
1960	downregulated of mta-3 in er-negative breast tumors	ceRNA	RGL1	21	6	1	0.0249642	0.156933	6.21308	5.1956e-10	0.00593131	SNAI2
1961	downregulated of mta-3 in er-negative breast tumors	ceRNA	RGMA	21	6	1	0.0249642	0.156933	6.21308	5.1956e-10	0.00593131	ESR1
1962	downregulated of mta-3 in er-negative breast tumors	ceRNA	RNF145	21	6	1	0.0249642	0.156933	6.21308	5.1956e-10	0.00593131	ESR1
1963	downregulated of mta-3 in er-negative breast tumors	ceRNA	SACS	21	6	1	0.0249642	0.156933	6.21308	5.1956e-10	0.00593131	SNAI2
1964	downregulated of mta-3 in er-negative breast tumors	ceRNA	SAMD4A	21	6	1	0.0249642	0.156933	6.21308	5.1956e-10	0.00593131	SNAI2
1965	downregulated of mta-3 in er-negative breast tumors	ceRNA	SATB2	21	6	1	0.0249642	0.156933	6.21308	5.1956e-10	0.00593131	ESR1
1966	downregulated of mta-3 in er-negative breast tumors	ceRNA	SEMA6D	21	6	1	0.0249642	0.156933	6.21308	5.1956e-10	0.00593131	SNAI2
1967	downregulated of mta-3 in er-negative breast tumors	ceRNA	SFMBT1	21	6	1	0.0249642	0.156933	6.21308	5.1956e-10	0.00593131	ESR1
1968	downregulated of mta-3 in er-negative breast tumors	ceRNA	SGPP1	21	6	1	0.0249642	0.156933	6.21308	5.1956e-10	0.00593131	SNAI2
1969	downregulated of mta-3 in er-negative breast tumors	ceRNA	SH3KBP1	21	6	1	0.0249642	0.156933	6.21308	5.1956e-10	0.00593131	SNAI2
1970	downregulated of mta-3 in er-negative breast tumors	ceRNA	SLITRK4	21	6	1	0.0249642	0.156933	6.21308	5.1956e-10	0.00593131	SNAI2
1971	downregulated of mta-3 in er-negative breast tumors	ceRNA	SOSTDC1	21	6	1	0.0249642	0.156933	6.21308	5.1956e-10	0.00593131	SNAI2
1972	downregulated of mta-3 in er-negative breast tumors	ceRNA	STAC	21	6	1	0.0249642	0.156933	6.21308	5.1956e-10	0.00593131	SNAI2
1973	downregulated of mta-3 in er-negative breast tumors	ceRNA	TAF4B	21	6	1	0.0249642	0.156933	6.21308	5.1956e-10	0.00593131	GREB1
1974	downregulated of mta-3 in er-negative breast tumors	ceRNA	TBC1D9	21	6	1	0.0249642	0.156933	6.21308	5.1956e-10	0.00593131	ESR1
1975	downregulated of mta-3 in er-negative breast tumors	ceRNA	TCF4	21	6	1	0.0249642	0.156933	6.21308	5.1956e-10	0.00593131	ESR1
1976	downregulated of mta-3 in er-negative breast tumors	ceRNA	TEAD1	21	6	1	0.0249642	0.156933	6.21308	5.1956e-10	0.00593131	SNAI2
1977	downregulated of mta-3 in er-negative breast tumors	ceRNA	TNFSF11	21	6	1	0.0249642	0.156933	6.21308	5.1956e-10	0.00593131	ESR1
1978	downregulated of mta-3 in er-negative breast tumors	ceRNA	TP53INP1	21	6	2	0.0249642	0.156933	12.5852	2.54697e-36	2.90763e-29	ESR1;SNAI1
1979	downregulated of mta-3 in er-negative breast tumors	ceRNA	TRAM2	21	6	1	0.0249642	0.156933	6.21308	5.1956e-10	0.00593131	SNAI2
1980	downregulated of mta-3 in er-negative breast tumors	ceRNA	TRIM3	21	6	1	0.0249642	0.156933	6.21308	5.1956e-10	0.00593131	ESR1
1981	downregulated of mta-3 in er-negative breast tumors	ceRNA	TRPS1	21	6	1	0.0249642	0.156933	6.21308	5.1956e-10	0.00593131	ESR1
1982	downregulated of mta-3 in er-negative breast tumors	ceRNA	UACA	21	6	1	0.0249642	0.156933	6.21308	5.1956e-10	0.00593131	SNAI2
1983	downregulated of mta-3 in er-negative breast tumors	ceRNA	VCAN	21	6	1	0.0249642	0.156933	6.21308	5.1956e-10	0.00593131	SNAI2
1984	downregulated of mta-3 in er-negative breast tumors	ceRNA	WASF1	21	6	1	0.0249642	0.156933	6.21308	5.1956e-10	0.00593131	SNAI2
1985	downregulated of mta-3 in er-negative breast tumors	ceRNA	WIPF1	21	6	1	0.0249642	0.156933	6.21308	5.1956e-10	0.00593131	SNAI2
1986	downregulated of mta-3 in er-negative breast tumors	ceRNA	YIPF4	21	6	1	0.0249642	0.156933	6.21308	5.1956e-10	0.00593131	MTA3
1987	downregulated of mta-3 in er-negative breast tumors	ceRNA	ZBTB4	21	6	1	0.0249642	0.156933	6.21308	5.1956e-10	0.00593131	ESR1
1988	downregulated of mta-3 in er-negative breast tumors	ceRNA	ZEB2	21	6	1	0.0249642	0.156933	6.21308	5.1956e-10	0.00593131	SNAI2
1989	downregulated of mta-3 in er-negative breast tumors	ceRNA	ZFHX4	21	6	1	0.0249642	0.156933	6.21308	5.1956e-10	0.00593131	SNAI2
1990	downregulated of mta-3 in er-negative breast tumors	ceRNA	ZNF238	21	6	1	0.0249642	0.156933	6.21308	5.1956e-10	0.00593131	ESR1
1991	downregulated of mta-3 in er-negative breast tumors	ceRNA	ZNF521	21	6	1	0.0249642	0.156933	6.21308	5.1956e-10	0.00593131	SNAI2
1992	e2f1 destruction pathway	ceRNA	CDK17	10	8	2	0.043585	0.207255	9.43965	3.74027e-21	4.2699e-14	SKP1;TFDP1
1993	e2f1 destruction pathway	ceRNA	CIT	10	8	2	0.043585	0.207255	9.43965	3.74027e-21	4.2699e-14	CDK2;E2F1
1994	e2f1 destruction pathway	ceRNA	CNOT6	10	8	2	0.043585	0.207255	9.43965	3.74027e-21	4.2699e-14	CDK2;SKP1
1995	e2f1 destruction pathway	ceRNA	CPEB3	10	8	2	0.043585	0.207255	9.43965	3.74027e-21	4.2699e-14	RB1;TFDP1
1996	e2f1 destruction pathway	ceRNA	DYRK1A	10	8	2	0.043585	0.207255	9.43965	3.74027e-21	4.2699e-14	RB1;TFDP1
1997	e2f1 destruction pathway	ceRNA	E2F7	10	8	2	0.043585	0.207255	9.43965	3.74027e-21	4.2699e-14	CCNE1;CDK2
1998	e2f1 destruction pathway	ceRNA	KIF23	10	8	2	0.043585	0.207255	9.43965	3.74027e-21	4.2699e-14	CCNE1;E2F1
[truncated: 4,160 more rows]

## Sheet: CancerCellMap
No.	Pathway	Regulator		Number of genes			Poisson binomial test					List of targets
		Type	ID	In pathway	In targetome	As target	Mean	STD	Z-stat	P-val (two-tailed)	Adjusted P-val
1	Alpha6Beta4Integrin	miRNA	hsa-miR-200b-3p	47	35	9	1.18839	1.05294	7.41885	1.18142e-13	3.2814e-07	ABL1;PRKCA;RAC1;RHOA;SHC1;SMAD2;YES1;YWHAB;YWHAQ
2	Alpha6Beta4Integrin	miRNA	hsa-miR-31-5p	47	35	8	1.18839	1.05294	6.46913	9.85688e-11	0.000273775	MET;PIK3R3;RAC1;RHOA;VIM;YWHAE;YWHAH;YWHAZ
3	Alpha6Beta4Integrin	miRNA	hsa-miR-320a	47	35	8	1.18839	1.05294	6.46913	9.85688e-11	0.000273775	PAK1;PIK3CA;VIM;YES1;YWHAE;YWHAH;YWHAQ;YWHAZ
4	Alpha6Beta4Integrin	miRNA	hsa-miR-429	47	35	9	1.18839	1.05294	7.41885	1.18142e-13	3.2814e-07	FYN;PRKCA;RAC1;RHOA;SHC1;SMAD2;YES1;YWHAB;YWHAQ
5	AndrogenReceptor	miRNA	hsa-miR-106a-5p	74	52	13	2.80067	1.57858	6.46109	1.03951e-10	0.000288724	CCND1;EP300;ESR1;GTF2H1;KAT2B;NCOA1;NCOA3;PTEN;RB1;RNF4;RUNX2;SMAD4;STAT3
6	AndrogenReceptor	miRNA	hsa-miR-106b-5p	74	52	15	2.80067	1.57858	7.72806	1.09198e-14	3.03298e-08	CCND1;EP300;ESR1;IL6ST;KAT2B;NCOA3;PTEN;RB1;RNF4;RUNX2;SMAD4;SP1;STAT3;TGFB1I1;UBE3A
7	AndrogenReceptor	miRNA	hsa-miR-17-5p	74	52	13	2.80067	1.57858	6.46109	1.03951e-10	0.000288724	CCND1;EP300;ESR1;KAT2B;NCOA1;NCOA3;PTEN;RB1;RNF4;RUNX2;SMAD4;STAT3;UBE3A
8	AndrogenReceptor	miRNA	hsa-miR-20a-5p	74	52	16	2.80067	1.57858	8.36154	6.19048e-17	1.71941e-10	APPL1;CCND1;EP300;ESR1;GTF2H1;KAT2B;NCOA1;NCOA3;PATZ1;PTEN;RB1;RNF4;RUNX2;SMAD4;STAT3;TGFB1I1
9	AndrogenReceptor	miRNA	hsa-miR-20b-5p	74	52	14	2.80067	1.57858	7.09458	1.29745e-12	3.60367e-06	APPL1;CCND1;EP300;GTF2H1;NCOA1;NCOA3;PA2G4;PATZ1;PTEN;RANBP9;RB1;RNF4;RUNX2;STAT3
10	AndrogenReceptor	miRNA	hsa-miR-32-3p	74	52	13	2.80067	1.57858	6.46109	1.03951e-10	0.000288724	CREBBP;EP300;GTF2H1;KAT2B;NCOA1;NCOA2;NRIP1;PAK6;PNRC1;RANBP9;RUNX2;SP1;TMF1
11	AndrogenReceptor	miRNA	hsa-miR-3609	74	52	14	2.80067	1.57858	7.09458	1.29745e-12	3.60367e-06	APPL1;ATF2;CAV1;CCND1;EP300;IL6ST;NCOA1;NCOA3;NRIP1;PTEN;RB1;RNF4;SVIL;UBE3A
12	AndrogenReceptor	miRNA	hsa-miR-374c-5p	74	52	13	2.80067	1.57858	6.46109	1.03951e-10	0.000288724	ATF2;CCND1;CREBBP;EP300;GTF2H1;NCOA1;NCOA2;NCOA3;NR2C2;PATZ1;PNRC1;RANBP9;SP1
13	AndrogenReceptor	miRNA	hsa-miR-548b-5p	74	52	13	2.80067	1.57858	6.46109	1.03951e-10	0.000288724	CAV1;EP300;GTF2H1;KAT2B;NCOA1;PA2G4;PIAS1;PIAS3;PTEN;RB1;RUNX2;STAT3;TMF1
14	AndrogenReceptor	miRNA	hsa-miR-548t-5p	74	52	13	2.80067	1.57858	6.46109	1.03951e-10	0.000288724	ATF2;CAV1;GTF2H1;IL6ST;KAT2B;NCOA2;NRIP1;RANBP9;RB1;SIN3A;SMAD4;STAT3;UBE2I
15	EGFR1	miRNA	hsa-let-7a-3p	134	94	19	4.29352	1.98803	7.3975	1.38772e-13	3.8544e-07	ASAP1;CBL;CDC42;CREB1;CRK;CRKL;EPS8;FOXO1;HAT1;JAK2;KRAS;PKN2;PTPN12;RBBP7;RPS6KA1;SH3GL3;SNCA;SPRY2;VAV3
16	EGFR1	miRNA	hsa-miR-101-3p	134	94	20	4.29352	1.98803	7.90051	2.77765e-15	7.71493e-09	ASAP1;CAV2;CBLB;CDC42;CEBPA;EPS8;FOS;GAB1;GJA1;JAK2;MAP3K2;MAP3K4;MAPK1;PIK3C2B;PITPNA;RAB5A;RASA1;RBBP7;SOS1;SP1
17	EGFR1	miRNA	hsa-miR-105-5p	134	94	20	4.29352	1.98803	7.90051	2.77765e-15	7.71493e-09	ATF1;CREB1;CRK;ELK4;EPS8;KRAS;MAPK1;NCK2;PIK3C2B;PIK3CA;PKN2;PRKCB;PRKCI;PRKD1;PTPRR;RASA1;SMAD2;SOS1;SP1;YWHAB
18	EGFR1	miRNA	hsa-miR-106a-5p	134	94	19	4.29352	1.98803	7.3975	1.38772e-13	3.8544e-07	ABI1;CREB1;CRK;GJA1;JAK1;KLF11;MAP2K1;MAP3K14;MAP3K3;NCK2;PIK3R3;PKN2;PRKAR1A;PTPN12;RBBP7;RPS6KA1;SHOC2;SOCS3;STAT3
19	EGFR1	miRNA	hsa-miR-106b-5p	134	94	24	4.29352	1.98803	9.91255	3.67154e-23	1.01977e-16	ABI1;CEBPB;CREB1;CRK;GJA1;JAK1;KLF11;KRAS;MAP3K14;MAP3K3;MAPK1;NCK2;NRAS;PIK3R3;PKN2;PRKAR1A;PRKD1;PTPN12;RBBP7;RPS6KA1;SHOC2;SOCS3;SP1;STAT3
20	EGFR1	miRNA	hsa-miR-130a-3p	134	94	17	4.29352	1.98803	6.39148	1.64288e-10	0.000456311	ABI1;ARF4;ASAP1;CREB1;CSK;GJA1;JAK1;KRAS;MAP3K14;MAP3K4;PTPN12;RAB5A;RALBP1;RASA1;RPS6KA3;SPRY2;WASL
21	EGFR1	miRNA	hsa-miR-142-5p	134	94	19	4.29352	1.98803	7.3975	1.38772e-13	3.8544e-07	ARF4;ASAP1;ATF1;CDC42;CREB1;CRK;EPS15;JAK1;MAP3K2;MAPK14;NCK1;NCK2;PKN2;PRKCB;PTPN12;RAB5A;RALBP1;SH3KBP1;SOCS1
22	EGFR1	miRNA	hsa-miR-144-3p	134	94	21	4.29352	1.98803	8.40352	4.33291e-17	1.20347e-10	ABI1;CAV2;CDC42;FOS;FOXO1;GAB1;GJA1;HAT1;JAK2;MAP3K2;MAP3K3;MAP3K4;PITPNA;PKN2;PTPN11;RAB5A;RALBP1;RASA1;RBBP7;SP1;TGIF1
23	EGFR1	miRNA	hsa-miR-148a-3p	134	94	19	4.29352	1.98803	7.3975	1.38772e-13	3.8544e-07	ARF4;ASAP1;CSK;EPS15;ERRFI1;FOS;KLF11;MAP3K4;MTA2;NRAS;PIK3CA;PIK3R3;PTPN12;RAC1;RALBP1;SH3KBP1;SOS1;SP1;YWHAB
24	EGFR1	miRNA	hsa-miR-152	134	94	20	4.29352	1.98803	7.90051	2.77765e-15	7.71493e-09	ARF4;ASAP1;CSK;CTNND1;EPS15;ERRFI1;FOS;MAP3K4;MTA2;NRAS;PIK3C2B;PIK3CA;PIK3R3;RALBP1;SH3KBP1;SMAD2;SOCS3;SOS1;SPRY2;YWHAB
25	EGFR1	miRNA	hsa-miR-17-5p	134	94	21	4.29352	1.98803	8.40352	4.33291e-17	1.20347e-10	ABI1;CREB1;CRK;GJA1;JAK1;KLF11;KRAS;MAP2K1;MAP3K14;MYC;NCK2;NRAS;PIK3R3;PKN2;PRKAR1A;PRKD1;PTPN12;RBBP7;SHOC2;SOCS3;STAT3
26	EGFR1	miRNA	hsa-miR-19a-3p	134	94	18	4.29352	1.98803	6.89449	5.40584e-12	1.50147e-05	EPS15;ERRFI1;GJA1;KRAS;MAP3K14;MAPK1;MAPK14;PIK3CA;PIK3R3;PRKCA;PRKCB;RAF1;RASA1;SH3KBP1;SOCS1;SOCS3;TGIF1;WASL
27	EGFR1	miRNA	hsa-miR-200b-3p	134	94	19	4.29352	1.98803	7.3975	1.38772e-13	3.8544e-07	ASAP1;CDC42;CRKL;EPS15;EPS8;ERRFI1;KRAS;MAPK7;NCK2;PITPNA;PRKAR1A;PRKCA;PRKCB;PTPN12;RAC1;SHOC2;SMAD2;SP1;YWHAB
28	EGFR1	miRNA	hsa-miR-20a-5p	134	94	23	4.29352	1.98803	9.40954	4.98313e-21	1.38407e-14	ABI1;CEBPB;CREB1;CRK;GJA1;JAK1;KLF11;KRAS;MAP3K14;MAP3K3;MYC;NCK2;NRAS;PIK3R3;PKN2;PRKAR1A;PTPN12;RBBP7;RPS6KA1;SHOC2;SOCS3;SOS1;STAT3
29	EGFR1	miRNA	hsa-miR-27a-3p	134	94	18	4.29352	1.98803	6.89449	5.40584e-12	1.50147e-05	ASAP1;CBLB;CDC42;CREB1;GAB1;HAT1;KRAS;MAP3K4;NCK1;NRAS;PKN2;PRKCB;PRKD1;PXN;RAC1;SH3GL3;SP1;SPRY2
30	EGFR1	miRNA	hsa-miR-27b-3p	134	94	19	4.29352	1.98803	7.3975	1.38772e-13	3.8544e-07	ASAP1;CBLB;CDC42;CREB1;GAB1;HAT1;KRAS;MAP3K4;NRAS;PKN2;PRKCB;PRKD1;PXN;SH3GL3;SMAD2;SOS1;SP1;SPRY2;VAV3
31	EGFR1	miRNA	hsa-miR-30a-5p	134	94	23	4.29352	1.98803	9.40954	4.98313e-21	1.38407e-14	AP2A1;ARF4;ASAP1;ATF1;CBLB;CRKL;GJA1;JAK1;KLF11;KRAS;MAP3K2;NCK2;PIK3C2B;PIK3R2;PRKAR1A;PRKCB;SH3KBP1;SHOC2;SMAD2;SOCS1;SOS1;VAV3;WASL
32	EGFR1	miRNA	hsa-miR-30b-5p	134	94	27	4.29352	1.98803	11.4216	3.26173e-30	9.05947e-24	AP2A1;ARF4;ASAP1;ATF1;CBLB;CREB1;CRKL;ERRFI1;GJA1;JAK1;KLF11;KRAS;MAP3K2;NCK2;PIK3C2B;PIK3R2;PKN2;PRKAR1A;RASA1;SH3KBP1;SHOC2;SMAD2;SOCS1;SOCS3;SOS1;VAV3;WASL
33	EGFR1	miRNA	hsa-miR-30c-5p	134	94	21	4.29352	1.98803	8.40352	4.33291e-17	1.20347e-10	AP2A1;ARF4;ASAP1;ATF1;CBLB;CREB1;ERRFI1;GJA1;KLF11;KRAS;MAP3K2;NCK2;PRKAR1A;PRKCB;RASA1;SH3KBP1;SHOC2;SMAD2;SOCS1;VAV3;WASL
34	EGFR1	miRNA	hsa-miR-30d-5p	134	94	22	4.29352	1.98803	8.90653	5.26547e-19	1.46249e-12	AP2A1;ARF4;ASAP1;ATF1;CBLB;CREB1;GJA1;JAK1;KLF11;KRAS;MAP3K2;NCK2;PRKAR1A;RASA1;SH3KBP1;SHOC2;SMAD2;SOCS1;SOCS3;SOS1;VAV3;WASL
35	EGFR1	miRNA	hsa-miR-30e-5p	134	94	26	4.29352	1.98803	10.9186	9.39325e-28	2.60898e-21	AP2A1;ARF4;ASAP1;ATF1;CBLB;CREB1;CRKL;ERRFI1;GJA1;JAK1;KLF11;KRAS;NCK2;PIK3C2B;PIK3R2;PRKAR1A;PRKCB;RASA1;SH3KBP1;SHOC2;SMAD2;SOCS1;SOCS3;SOS1;VAV3;WASL
36	EGFR1	miRNA	hsa-miR-3163	134	94	18	4.29352	1.98803	6.89449	5.40584e-12	1.50147e-05	ABI1;CTNND1;ERRFI1;FOS;GJA1;MAP3K2;MAP3K3;MAPK1;PRKAR1A;PTPN12;RAB5A;RASA1;SH3KBP1;SHOC2;SOCS1;SPRY2;STAT5B;TGIF1
37	EGFR1	miRNA	hsa-miR-340-5p	134	94	20	4.29352	1.98803	7.90051	2.77765e-15	7.71493e-09	ABI1;ARF4;ASAP1;ATF1;CAV2;CDC42;CTNND1;FOXO1;GAB1;MAP3K2;NCK1;PKN2;RALBP1;RASA1;SH3GL3;SHOC2;SOCS3;SPRY2;STAT5B;WASL
38	EGFR1	miRNA	hsa-miR-3607-3p	134	94	20	4.29352	1.98803	7.90051	2.77765e-15	7.71493e-09	ASAP1;ATF1;CBL;CBLB;CRK;CRKL;ERRFI1;FOXO1;GJA1;JAK2;MAP3K3;NCK2;PIK3CA;PIK3R2;PRKCB;RASA1;SHOC2;SOS1;SPRY2;VAV3
39	EGFR1	miRNA	hsa-miR-3662	134	94	17	4.29352	1.98803	6.39148	1.64288e-10	0.000456311	ATF1;CAV1;CDC42;CRKL;CSK;EPS15;ERRFI1;PKN2;PRKD1;PTPN11;PTPRR;RAB5A;RAF1;RASA1;SH3KBP1;SP1;SPRY2
40	EGFR1	miRNA	hsa-miR-429	134	94	18	4.29352	1.98803	6.89449	5.40584e-12	1.50147e-05	ASAP1;CDC42;CRKL;EPS15;EPS8;ERRFI1;GAB1;KRAS;NCK2;PITPNA;PRKAR1A;PRKCA;PRKCB;PTPN12;RAC1;SHOC2;SMAD2;YWHAB
41	EGFR1	miRNA	hsa-miR-548d-3p	134	94	18	4.29352	1.98803	6.89449	5.40584e-12	1.50147e-05	ABI1;ATF1;CEBPA;CTNND1;FOS;FOXO1;KLF11;KRAS;MAP3K2;MAP3K3;MYC;PIK3R3;PRKAR1A;PRKCB;RAF1;RALBP1;RPS6KA3;SPRY2
42	EGFR1	miRNA	hsa-miR-548e	134	94	17	4.29352	1.98803	6.39148	1.64288e-10	0.000456311	ATF1;CREB1;CRK;CSK;FOS;GJA1;JAK2;MAP3K3;NCK1;PIK3R3;PKN2;PTPN12;PTPRR;RAB5A;RALBP1;RASA1;SPRY2
43	EGFR1	miRNA	hsa-miR-548f	134	94	18	4.29352	1.98803	6.89449	5.40584e-12	1.50147e-05	ATF1;CREB1;CRK;CSK;FOS;GJA1;JAK2;MTA2;NCK1;NCK2;PIK3R3;PKN2;PTPN12;PTPRR;RAB5A;RALBP1;RASA1;SPRY2
44	EGFR1	miRNA	hsa-miR-548l	134	94	17	4.29352	1.98803	6.39148	1.64288e-10	0.000456311	ARF4;CAV1;CRK;EPS15;MAPK1;PKN2;PRKCB;PTPN12;PTPRR;RASA1;SHOC2;SOS1;SP1;STAT3;STAT5B;VAV3;WASL
45	EGFR1	miRNA	hsa-miR-590-3p	134	94	17	4.29352	1.98803	6.39148	1.64288e-10	0.000456311	ARF4;ATF1;CDC42;CREB1;CRKL;KRAS;NCK1;PIK3CA;PKN2;PTPN11;RAC1;RALBP1;SHOC2;SMAD2;SP1;SPRY2;WASL
46	ID	miRNA	hsa-let-7a-3p	14	12	5	0.41127	0.612267	7.49465	6.64755e-14	1.84636e-07	CCNA2;ELK3;ID2;ID4;TCF3
47	ID	miRNA	hsa-let-7b-3p	14	12	5	0.41127	0.612267	7.49465	6.64755e-14	1.84636e-07	CCNA2;ELK3;ID2;ID4;TCF3
48	ID	miRNA	hsa-miR-381	14	12	5	0.41127	0.612267	7.49465	6.64755e-14	1.84636e-07	CCNA2;ELK3;ID2;ID4;TCF3
49	KitReceptor	miRNA	hsa-miR-19a-3p	53	35	12	1.57948	1.20359	8.65789	4.80577e-18	1.3348e-11	CLTC;KIT;MAPK1;PRKCA;PRKCB;RAF1;RASA1;SH3KBP1;SOCS1;SOCS5;SOCS6;YES1
50	KitReceptor	miRNA	hsa-miR-19b-3p	53	35	9	1.57948	1.20359	6.16534	7.03319e-10	0.00195347	KIT;MAPK1;RAF1;RASA1;SH3KBP1;SOCS1;SOCS5;SOCS6;YES1
51	KitReceptor	miRNA	hsa-miR-200b-3p	53	35	9	1.57948	1.20359	6.16534	7.03319e-10	0.00195347	CRKL;EP300;PLCG1;PRKCA;PRKCB;SHC1;SOCS6;SPRED1;YES1
52	KitReceptor	miRNA	hsa-miR-20a-5p	53	35	9	1.57948	1.20359	6.16534	7.03319e-10	0.00195347	CRK;EP300;PIK3R1;PTPRU;RPS6KA1;SOCS6;SOS1;SPRED1;YES1
53	KitReceptor	miRNA	hsa-miR-30b-5p	53	35	9	1.57948	1.20359	6.16534	7.03319e-10	0.00195347	CLTC;CRKL;PIK3R2;PLCG1;RASA1;SH3KBP1;SOCS1;SOCS6;SOS1
54	KitReceptor	miRNA	hsa-miR-30e-5p	53	35	10	1.57948	1.20359	6.99619	2.63017e-12	7.30531e-06	CLTC;CRKL;PIK3R2;PLCG1;PRKCB;RASA1;SH3KBP1;SOCS1;SOCS6;SOS1
55	KitReceptor	miRNA	hsa-miR-3607-3p	53	35	11	1.57948	1.20359	7.82704	4.9949e-15	1.38734e-08	CBL;CRK;CRKL;JAK2;KIT;KITLG;PIK3R2;PRKCB;RASA1;SOCS6;SOS1
56	KitReceptor	miRNA	hsa-miR-429	53	35	9	1.57948	1.20359	6.16534	7.03319e-10	0.00195347	CRKL;EP300;FYN;PLCG1;PRKCA;PRKCB;SHC1;SOCS6;YES1
57	KitReceptor	miRNA	hsa-miR-548l	53	35	11	1.57948	1.20359	7.82704	4.9949e-15	1.38734e-08	CRK;EP300;KITLG;MAPK1;PRKCB;RASA1;SOCS5;SOCS6;SOS1;SRC;STAT5B
58	KitReceptor	miRNA	hsa-miR-9-3p	53	35	9	1.57948	1.20359	6.16534	7.03319e-10	0.00195347	CRK;KITLG;PIK3R1;PLCG1;RASA1;SH3KBP1;SOCS1;SPRED1;SPRED2
59	NOTCH	miRNA	hsa-let-7a-3p	56	47	14	1.6947	1.24491	9.88447	4.86147e-23	1.35028e-16	APP;CUL1;DLL1;GSK3B;HEY1;JAG2;JAK2;NFKBIA;NOTCH3;RBPJ;SMAD4;SPEN;TCF3;YY1
60	NOTCH	miRNA	hsa-let-7b-3p	56	47	11	1.6947	1.24491	7.47466	7.74037e-14	2.14989e-07	CUL1;DLL1;GSK3B;HEY1;JAG2;NFKBIA;NOTCH3;SMAD4;SPEN;TCF3;TLE1
61	NOTCH	miRNA	hsa-let-7f-1-3p	56	47	10	1.6947	1.24491	6.67139	2.53392e-11	7.03797e-05	CUL1;DLL1;GSK3B;JAG2;NFKBIA;NOTCH3;SMAD4;SPEN;TLE1;YY1
62	NOTCH	miRNA	hsa-miR-340-5p	56	47	10	1.6947	1.24491	6.67139	2.53392e-11	7.03797e-05	DLL1;DLL4;GSK3B;MAML1;NCOR1;NFKB1;NOTCH3;SKP1;TCF3;YY1
63	NOTCH	miRNA	hsa-miR-3662	56	47	10	1.6947	1.24491	6.67139	2.53392e-11	7.03797e-05	APH1A;APP;DLL4;FBXW7;KAT2B;MAML1;NFKB1;NUMB;TCF3;YY1
64	NOTCH	miRNA	hsa-miR-381	56	47	13	1.6947	1.24491	9.0812	1.07384e-19	2.98259e-13	CUL1;DLL1;DLL4;GSK3B;HEY1;JAG2;NFKBIA;NOTCH3;RBPJ;SPEN;TCF3;TLE1;YY1
65	NOTCH	miRNA	hsa-miR-548f	56	47	10	1.6947	1.24491	6.67139	2.53392e-11	7.03797e-05	CUL1;EP300;FBXW7;GSK3B;JAK2;KAT2B;NFKBIA;PSEN2;SKP1;SPEN
66	NOTCH	miRNA	hsa-miR-548t-5p	56	47	11	1.6947	1.24491	7.47466	7.74037e-14	2.14989e-07	APP;CUL1;KAT2B;MAML1;MAML3;MAPK1;NFKB1;SIN3A;SMAD4;STAT3;YY1
67	NOTCH	miRNA	hsa-miR-548y	56	47	10	1.6947	1.24491	6.67139	2.53392e-11	7.03797e-05	APP;EP300;FBXW7;GSK3B;KAT2B;MAML1;MAML3;NFKB1;NOTCH2;STAT3
68	TGFBR	miRNA	hsa-let-7a-3p	122	104	22	5.52145	2.21886	7.42657	1.1145e-13	3.09553e-07	CDK6;CREBBP;CTCF;CTNNB1;CUL1;FKBP1A;FOXO1;HOXA9;LEF1;MEF2A;MEF2C;NFYB;NUP153;ROCK1;SKI;SMAD4;SMAD7;TGFB3;TGFBR3;UBE2D3;XPO1;ZEB1
69	TGFBR	miRNA	hsa-let-7b-3p	122	104	21	5.52145	2.21886	6.97589	3.0394e-12	8.44195e-06	CDK6;CTCF;CTNNB1;CUL1;FKBP1A;FOXO1;HOXA9;LEF1;MEF2A;MEF2C;NCOA1;NFYB;NUP153;SDC2;SKI;SMAD4;SMAD7;TGFBR3;UBE2D3;XPO1;ZEB1
70	TGFBR	miRNA	hsa-let-7f-1-3p	122	104	21	5.52145	2.21886	6.97589	3.0394e-12	8.44195e-06	CDK6;CREBBP;CTCF;CTNNB1;CUL1;FKBP1A;FOXO1;HOXA9;LEF1;MEF2A;MEF2C;NFYB;NUP153;SDC2;SKI;SMAD4;SMAD7;TGFBR3;UBE2D3;XPO1;ZEB1
71	TGFBR	miRNA	hsa-miR-105-5p	122	104	20	5.52145	2.21886	6.52521	6.79063e-11	0.00018861	CDC27;CDK6;CTCF;CTNNB1;KAT2B;LEF1;MEF2C;NCOA1;PRKCB;RUNX2;SMAD2;SNIP1;SNX4;SP1;UBE2D1;UBE2D2;UBE2E1;XPO1;ZEB1;ZEB2
72	TGFBR	miRNA	hsa-miR-106a-5p	122	104	27	5.52145	2.21886	9.67998	3.66788e-22	1.01876e-15	CCND1;CDC23;CDC25A;CDK6;CDKN1A;DAB2;EP300;ESR1;HSPA8;KAT2B;LEF1;MAP3K7;MEF2C;NCOA1;PPP2R2A;RB1;RBL2;RUNX2;SKI;SMAD4;SMAD6;SMAD7;TFDP1;TGFBR2;UBE2D3;XPO1;ZFYVE9
73	TGFBR	miRNA	hsa-miR-106b-5p	122	104	27	5.52145	2.21886	9.67998	3.66788e-22	1.01876e-15	CCND1;CDC23;CDC25A;CDK6;CDKN1A;CTCF;DAB2;EP300;ESR1;HSPA8;KAT2B;LEF1;MAP3K7;MEF2C;PPP2R2A;RB1;RBL2;RUNX2;SKI;SMAD4;SMAD6;SMAD7;SP1;TFDP1;TGFBR2;XPO1;ZFYVE9
74	TGFBR	miRNA	hsa-miR-135b-5p	122	104	19	5.52145	2.21886	6.07453	1.24351e-09	0.00345385	BTRC;FKBP1A;FOXO1;MEF2A;MEF2C;MYC;NCOA1;NUP153;PIK3R2;PPP2R2A;ROCK1;RUNX2;SMAD2;SMAD4;SMURF2;SP1;TGFBR2;UBE2D3;ZEB2
75	TGFBR	miRNA	hsa-miR-144-3p	122	104	20	5.52145	2.21886	6.52521	6.79063e-11	0.00018861	CDC27;ETS1;FOS;FOSB;FOXO1;HOXA9;MEF2A;PPP2R2A;RBL2;ROCK1;SMAD3;SMAD4;SP1;TGFBR2;TGFBR3;TGIF1;UBE2D1;UBE2D3;ZEB1;ZEB2
76	TGFBR	miRNA	hsa-miR-15b-5p	122	104	20	5.52145	2.21886	6.52521	6.79063e-11	0.00018861	BTRC;CCND1;CCNE1;CDC23;CDC25A;CDC27;CDK6;FKBP1A;FNTA;FOXO1;HSPA8;MAP3K7;PRKAR2A;SKIL;SMAD7;SMURF2;SNX4;TGFBR3;UBE2D3;XPO1
77	TGFBR	miRNA	hsa-miR-16-5p	122	104	21	5.52145	2.21886	6.97589	3.0394e-12	8.44195e-06	ATF2;BTRC;CCND1;CCNE1;CDC23;CDC25A;CDC27;CDK6;FKBP1A;FNTA;FOXO1;HSPA8;MAP3K7;PRKAR2A;SKI;SKIL;SMURF2;SNX4;TGFBR3;UBE2D3;XPO1
78	TGFBR	miRNA	hsa-miR-17-5p	122	104	30	5.52145	2.21886	11.032	2.67841e-28	7.43929e-22	CCND1;CDC23;CDC25A;CDKN1A;DAB2;EP300;ESR1;HSPA8;KAT2B;LEF1;MAP3K7;MEF2C;MYC;NCOA1;PPP2R2A;RB1;RBL1;RBL2;RUNX2;SKI;SMAD4;SMAD6;SMAD7;SMURF1;TFDP1;TGFBR2;TGFBR3;UBE2D3;XPO1;ZFYVE9
79	TGFBR	miRNA	hsa-miR-186-5p	122	104	19	5.52145	2.21886	6.07453	1.24351e-09	0.00345385	CDC27;CDK2;CREBBP;DAXX;EP300;ESR1;HOXA9;MEF2C;NUP153;ROCK1;SDC2;SMAD6;SNX2;TGFBR2;TGFBR3;TGIF1;UBE2D2;ZEB1;ZEB2
80	TGFBR	miRNA	hsa-miR-20a-5p	122	104	27	5.52145	2.21886	9.67998	3.66788e-22	1.01876e-15	CCND1;CDC23;CDC25A;CDK6;CDKN1A;DAB2;EP300;ESR1;HSPA8;KAT2B;MAP3K7;MYC;NCOA1;PPP2R2A;RB1;RBL2;RUNX2;SKI;SMAD4;SMAD6;SMAD7;TFDP1;TGFBR2;TGFBR3;UBE2D3;XPO1;ZFYVE9
81	TGFBR	miRNA	hsa-miR-20b-5p	122	104	23	5.52145	2.21886	7.87726	3.34638e-15	9.29458e-09	CCND1;CDC23;CDC25A;CDKN1A;CTCF;DAB2;EP300;HSPA8;LEF1;MAP3K7;MEF2C;NCOA1;RB1;RBL1;RBL2;RUNX2;SKI;SMAD6;SMAD7;SNX4;TGFBR2;XPO1;ZFYVE9
82	TGFBR	miRNA	hsa-miR-26a-5p	122	104	20	5.52145	2.21886	6.52521	6.79063e-11	0.00018861	ATF2;CCNE1;CDC27;CREBBP;CTNNB1;DAB2;EP300;HOXA9;HSPA8;LEF1;MAP3K7;MEF2C;NUP153;PRKCD;RB1;ROCK1;SKI;UBE2D1;UBE2D3;ZEB2
83	TGFBR	miRNA	hsa-miR-26b-5p	122	104	20	5.52145	2.21886	6.52521	6.79063e-11	0.00018861	ATF2;BTRC;CCNE1;CDC27;CDK2;CREBBP;DAB2;EP300;HOXA9;HSPA8;LEF1;MAP3K7;MEF2C;NUP153;PRKCD;RB1;ROCK1;SKI;UBE2D1;ZEB2
84	TGFBR	miRNA	hsa-miR-3163	122	104	30	5.52145	2.21886	11.032	2.67841e-28	7.43929e-22	ATF2;CDK4;CTCF;E2F4;ETS1;FKBP1A;FOS;FOXO3;HDAC1;KAT2B;MAP2K6;MEF2A;MEF2C;NCOA1;NUP153;PPP2R2A;RB1;RBL2;RUNX2;SMAD7;SMURF2;SNX2;SNX4;TFDP1;TGFBR2;TGFBR3;TGIF1;UBE2D2;UBE2D3;UBE2E1
85	TGFBR	miRNA	hsa-miR-32-3p	122	104	20	5.52145	2.21886	6.52521	6.79063e-11	0.00018861	BTRC;CDK1;CREBBP;EP300;HOXA9;HSPA8;KAT2B;KPNB1;MEF2A;MEF2C;NCOA1;NUP153;PPP2R2A;ROCK1;RUNX2;SP1;TFDP1;UBE2D3;XPO1;ZEB2
86	TGFBR	miRNA	hsa-miR-32-5p	122	104	20	5.52145	2.21886	6.52521	6.79063e-11	0.00018861	CDC27;CDK6;ESR1;FKBP1A;HOXA9;KAT2B;LEF1;NCOA1;NFYB;SDC2;SKI;SMAD6;SMAD7;SMURF1;SNX2;SP1;TGIF1;UBE2E1;XPO1;ZEB2
87	TGFBR	miRNA	hsa-miR-340-5p	122	104	22	5.52145	2.21886	7.42657	1.1145e-13	3.09553e-07	ATF2;CCND1;CDK4;CREBBP;CTNNB1;ESR1;FOXO1;HOXA9;HSPA8;MEF2A;MEF2C;NCOA1;RBL2;ROCK1;RUNX2;SKI;SKP1;SMAD7;SMURF1;SMURF2;TFDP1;TGFBR3
88	TGFBR	miRNA	hsa-miR-410	122	104	19	5.52145	2.21886	6.07453	1.24351e-09	0.00345385	CDC27;CDK1;CREBBP;CTCF;EP300;ETS1;FKBP1A;FOSB;HDAC1;MEF2A;MEF2C;NCOA1;SKIL;SMAD7;SMURF1;SNX2;SP1;TFDP1;TGFBR2
89	TGFBR	miRNA	hsa-miR-495	122	104	21	5.52145	2.21886	6.97589	3.0394e-12	8.44195e-06	ANAPC1;BTRC;CCND1;CREBBP;EP300;ETS1;FOXO1;FOXO3;JUN;KAT2B;MEF2A;NCOA1;NFYB;NUP153;PRKCB;RUNX2;SDC2;UBE2D1;UBE2E1;ZEB2;ZFYVE9
90	TGFBR	miRNA	hsa-miR-520a-3p	122	104	19	5.52145	2.21886	6.07453	1.24351e-09	0.00345385	CDC23;CDC25A;CDC27;CDK2;CTCF;FOXO3;HSPA8;LEF1;MAP3K7;MEF2A;MEF2C;RBL2;ROCK1;RUNX2;SMAD2;SNIP1;SP1;TGFBR2;XPO1
91	TGFBR	miRNA	hsa-miR-520d-5p	122	104	19	5.52145	2.21886	6.07453	1.24351e-09	0.00345385	ANAPC1;CDK2;FOXO1;FOXO3;HDAC1;KAT2B;MEF2A;MEF2C;NCOA1;NFYB;NUP153;PRKCB;SMURF2;SNX4;SP1;UBE2D3;XPO1;ZEB1;ZEB2
92	TGFBR	miRNA	hsa-miR-548c-3p	122	104	22	5.52145	2.21886	7.42657	1.1145e-13	3.09553e-07	CDC27;CDKN1A;CREBBP;CTNNB1;EP300;FOXO3;KAT2B;KPNB1;NCOA1;PRKCB;RB1;RUNX2;SDC2;SKI;SMURF2;TGFBR2;TGIF1;UBE2D2;UBE2D3;XPO1;ZEB1;ZEB2
93	TGFBR	miRNA	hsa-miR-548d-3p	122	104	27	5.52145	2.21886	9.67998	3.66788e-22	1.01876e-15	ATF2;CCNB2;CCND1;CREBBP;CTCF;ETS1;FKBP1A;FOS;FOXO1;HOXA9;KAT2B;LEF1;MEF2C;MYC;PRKCB;RBL2;ROCK1;SKI;SMAD6;SMURF1;STRAP;TFDP1;TGFBR3;UBE2D2;UBE2E1;ZEB1;ZEB2
94	TGFBR	miRNA	hsa-miR-548n	122	104	21	5.52145	2.21886	6.97589	3.0394e-12	8.44195e-06	ANAPC1;ATF2;CAV1;CTNNB1;E2F4;KAT2B;MEF2A;NCOA1;NFYB;NUP153;PPP2R2A;RUNX2;SKIL;SMURF2;SNW1;SP1;TGFBR3;UBE2D1;UBE2E1;ZEB1;ZEB2
95	TGFBR	miRNA	hsa-miR-570-3p	122	104	21	5.52145	2.21886	6.97589	3.0394e-12	8.44195e-06	CREBBP;CTNNB1;FKBP1A;FOS;FOXO1;FOXO3;KAT2B;MEF2A;MEF2C;NCOA1;PPP2R2A;PRKCB;ROCK1;RUNX2;SDC2;SKI;SNIP1;TGFBR3;UBE2E1;XPO1;ZEB1
96	TGFBR	miRNA	hsa-miR-590-3p	122	104	23	5.52145	2.21886	7.87726	3.34638e-15	9.29458e-09	ATF3;CREBBP;CUL1;EP300;ESR1;FNTA;HSPA8;KAT2B;LEF1;MEF2A;NCOA1;NUP153;PPP2R2A;ROCK1;SDC2;SMAD2;SMURF2;SNIP1;SP1;TFDP1;UBE2E1;XPO1;ZEB2
97	TGFBR	miRNA	hsa-miR-7-1-3p	122	104	19	5.52145	2.21886	6.07453	1.24351e-09	0.00345385	CDC27;CREBBP;FOXO1;HOXA9;KAT2B;MEF2A;NCOA1;PPP2R2A;ROCK1;RUNX2;SDC2;SP1;TFDP1;UBE2D1;UBE2D3;UBE2E1;ZEB1;ZEB2;ZFYVE9
98	TNF alpha/NF-kB	miRNA	hsa-let-7a-3p	159	102	15	3.88814	1.86763	5.94973	2.68585e-09	0.00745996	ACTL6A;CASP8AP2;CREBBP;CUL1;DCAF7;G3BP2;GSK3B;GTF2I;HSP90AB1;IQGAP2;MAP3K8;NFKBIA;NR2C2;SMARCB1;UBE2D3
99	TNF alpha/NF-kB	miRNA	hsa-let-7f-5p	159	102	16	3.88814	1.86763	6.48517	8.86318e-11	0.000246175	ACTL6A;BCL7A;CASP3;CDC34;CREBBP;FAF1;GTF2I;IKBKAP;IKBKE;NKIRAS2;SMARCC1;TAB2;TNFAIP3;TNFRSF1B;USP2;YWHAZ
100	TNF alpha/NF-kB	miRNA	hsa-miR-106a-5p	159	102	17	3.88814	1.86763	7.0206	2.20917e-12	6.13598e-06	FBXW11;G3BP2;KPNA2;KPNA3;MAP3K14;MAP3K3;MAP3K8;NKIRAS1;PAPOLA;PPP2CA;PPP6C;SRC;TAB3;TXLNA;UBE2D3;YWHAQ;YWHAZ
101	TNF alpha/NF-kB	miRNA	hsa-miR-135b-5p	159	102	17	3.88814	1.86763	7.0206	2.20917e-12	6.13598e-06	CSNK2A1;DDX3X;FAF1;FBXW11;GSK3B;KPNA3;MAP3K3;PEG3;PTPN11;SMARCE1;TAB2;TAB3;TBK1;TRAF4;UBE2D3;YWHAE;YWHAG
102	TNF alpha/NF-kB	miRNA	hsa-miR-15b-5p	159	102	17	3.88814	1.86763	7.0206	2.20917e-12	6.13598e-06	BAG4;BCL7A;CYLD;DDX3X;FKBP5;KPNA3;PAPOLA;PEG3;PPP2CA;PPP6C;PSMD7;TAB3;UBE2D3;USP2;YWHAE;YWHAH;YWHAQ
103	TNF alpha/NF-kB	miRNA	hsa-miR-195-5p	159	102	15	3.88814	1.86763	5.94973	2.68585e-09	0.00745996	BAG4;BCL7A;CYLD;DCAF7;DDX3X;GTF2I;KPNA3;PAPOLA;PPP6C;PSMD7;TAB3;USP2;YWHAE;YWHAH;YWHAQ
104	TNF alpha/NF-kB	miRNA	hsa-miR-19a-3p	159	102	17	3.88814	1.86763	7.0206	2.20917e-12	6.13598e-06	CYLD;DDX3X;FBXW11;G3BP2;GSK3B;KIAA1967;KPNA3;KPNA6;MAP3K14;MARK2;PPP1R13L;TBK1;TNFAIP3;UBE2D2;UBE2D3;YWHAE;ZFAND5
105	TNF alpha/NF-kB	miRNA	hsa-miR-19b-3p	159	102	15	3.88814	1.86763	5.94973	2.68585e-09	0.00745996	CYLD;DDX3X;FBXW11;G3BP2;GSK3B;KIAA1967;KPNA3;KPNA6;MAP3K14;PPP1R13L;TBK1;TNFAIP3;UBE2D2;YWHAE;ZFAND5
106	TNF alpha/NF-kB	miRNA	hsa-miR-20a-5p	159	102	16	3.88814	1.86763	6.48517	8.86318e-11	0.000246175	FBXW11;G3BP2;KPNA2;KPNA3;MAP3K14;MAP3K3;MAP3K8;NKIRAS1;PAPOLA;PPP2CA;PPP6C;TAB3;TXLNA;UBE2D3;YWHAQ;YWHAZ
107	TNF alpha/NF-kB	miRNA	hsa-miR-23c	159	102	15	3.88814	1.86763	5.94973	2.68585e-09	0.00745996	CASP7;CHUK;CREBBP;CSNK2A1;CSNK2A2;G3BP2;GAB1;GSK3B;KPNA3;PPP6C;SMARCC1;TAB2;TAB3;UBE2D3;YWHAG
108	TNF alpha/NF-kB	miRNA	hsa-miR-26a-5p	159	102	15	3.88814	1.86763	5.94973	2.68585e-09	0.00745996	BAG4;CREBBP;DDX3X;G3BP2;GSK3B;KPNA3;KPNA6;MAP3K2;PPP6C;TAB2;TAB3;TANK;UBE2D3;YWHAE;YWHAZ
109	TNF alpha/NF-kB	miRNA	hsa-miR-30b-5p	159	102	18	3.88814	1.86763	7.55604	4.15526e-14	1.15413e-07	BAG4;G3BP2;KPNA3;KPNA6;MAP3K2;PAPOLA;PPP6C;PSMD7;RASAL2;TAB3;TANK;UBE2D2;UBE2D3;UBE2I;USP2;YWHAG;YWHAZ;ZFAND5
110	TNF alpha/NF-kB	miRNA	hsa-miR-30d-3p	159	102	15	3.88814	1.86763	5.94973	2.68585e-09	0.00745996	CAV1;CREBBP;CSNK2A1;DDX3X;FBXW11;GSK3B;KPNA2;NFKB1;NR2C2;PAPOLA;PPP6C;TAB2;YWHAE;YWHAZ;ZFAND5
111	TNF alpha/NF-kB	miRNA	hsa-miR-3163	159	102	17	3.88814	1.86763	7.0206	2.20917e-12	6.13598e-06	ACTL6A;DDX3X;HDAC2;IQGAP2;KPNA3;KPNA6;MAP3K2;MAP3K3;MAP3K8;NR2C2;TAB3;TNFAIP3;UBE2D2;UBE2D3;UBE2I;YWHAQ;YWHAZ
112	TNF alpha/NF-kB	miRNA	hsa-miR-340-5p	159	102	16	3.88814	1.86763	6.48517	8.86318e-11	0.000246175	ACTL6A;CREBBP;DDX3X;G3BP2;GAB1;GSK3B;IQGAP2;KPNA3;MAP3K2;NFKB1;PAPOLA;SKP1;TAB2;TAB3;YWHAH;YWHAQ
113	TNF alpha/NF-kB	miRNA	hsa-miR-3662	159	102	15	3.88814	1.86763	5.94973	2.68585e-09	0.00745996	ACTL6A;CASP8AP2;CAV1;HSP90AB1;MAP3K8;NFKB1;PAPOLA;PPP6C;PTPN11;TAB3;TRAF3;UBE2D2;YWHAE;YWHAQ;YWHAZ
114	TNF alpha/NF-kB	miRNA	hsa-miR-381	159	102	15	3.88814	1.86763	5.94973	2.68585e-09	0.00745996	ACTL6A;CASP8AP2;CUL1;DCAF7;GSK3B;GTF2I;HSP90AB1;KIAA1967;KPNA3;MAP3K8;NFKBIA;PAPOLA;PPP6C;SMARCB1;UBE2D3
115	TNF alpha/NF-kB	miRNA	hsa-miR-429	159	102	15	3.88814	1.86763	5.94973	2.68585e-09	0.00745996	AKT2;CREBBP;DDX3X;FBXW11;GAB1;KPNA3;MCC;PAPOLA;PPP2CA;RASAL2;TBK1;UBE2I;YWHAB;YWHAG;YWHAQ
116	TNF alpha/NF-kB	miRNA	hsa-miR-520d-5p	159	102	15	3.88814	1.86763	5.94973	2.68585e-09	0.00745996	CHUK;DCAF7;DDX3X;FBXW11;GSK3B;IQGAP2;KPNA3;STAT1;TAB2;TAB3;UBE2D3;YWHAB;YWHAH;YWHAQ;YWHAZ
117	TNF alpha/NF-kB	miRNA	hsa-miR-548d-3p	159	102	19	3.88814	1.86763	8.09148	5.89441e-16	1.63717e-09	CASP3;CHUK;CREBBP;CSNK2B;CYLD;DDX3X;GSK3B;IQGAP2;KPNA6;MAP3K2;MAP3K3;PEG3;PKN1;PPP6C;SMARCB1;TAB2;UBE2D2;YWHAG;YWHAZ
118	TNF alpha/NF-kB	miRNA	hsa-miR-548e	159	102	19	3.88814	1.86763	8.09148	5.89441e-16	1.63717e-09	BAG4;CRADD;CUL1;DDX3X;G3BP2;GSK3B;KPNA3;MAP3K3;NFKBIA;PAPOLA;PPP6C;SKP1;SMARCB1;TAB2;TAB3;TXLNA;YWHAE;YWHAZ;ZFAND5
119	TNF alpha/NF-kB	miRNA	hsa-miR-548f	159	102	19	3.88814	1.86763	8.09148	5.89441e-16	1.63717e-09	BAG4;CUL1;DDX3X;G3BP2;GSK3B;KPNA3;NFKBIA;NR2C2;NSMAF;PAPOLA;PPP6C;SKP1;SMARCB1;TAB2;TAB3;TXLNA;YWHAE;YWHAZ;ZFAND5
120	TNF alpha/NF-kB	miRNA	hsa-miR-548t-5p	159	102	18	3.88814	1.86763	7.55604	4.15526e-14	1.15413e-07	CAV1;CSNK2A1;CSNK2A2;CUL1;DDX3X;G3BP2;GTF2I;KPNA2;KPNA3;MAP3K2;MAP3K3;NFKB1;PAPOLA;PPP6C;TXLNA;UBE2I;YWHAZ;ZFAND5
121	TNF alpha/NF-kB	miRNA	hsa-miR-7-1-3p	159	102	15	3.88814	1.86763	5.94973	2.68585e-09	0.00745996	CREBBP;CYLD;DCAF7;DDX3X;GSK3B;HSP90AA1;KPNA2;MAP3K2;PEG3;PFDN2;PPP2CA;PPP6C;RIPK2;TAB2;UBE2D3
122	TNF alpha/NF-kB	miRNA	hsa-miR-98	159	102	16	3.88814	1.86763	6.48517	8.86318e-11	0.000246175	ACTL6A;BCL7A;CASP3;CDC34;FAF1;GTF2I;IKBKAP;IKBKE;MAP3K3;SMARCC1;TAB2;TNFRSF1B;TXLNA;USP2;YWHAB;YWHAZ
123	Wnt	miRNA	hsa-miR-106a-5p	78	64	14	2.95711	1.6362	6.74911	1.48755e-11	4.13168e-05	DAB2;EP300;FZD1;FZD4;FZD7;LEF1;MAGI3;MAP3K7;NLK;PPP2CA;RUNX2;SALL1;SFRP2;SMAD4
124	Wnt	miRNA	hsa-miR-144-3p	78	64	14	2.95711	1.6362	6.74911	1.48755e-11	4.13168e-05	APC;BCL9;DKK1;FZD4;GSK3B;MAGI3;MAP1B;MAP3K4;NLK;RHOA;SALL1;SFRP1;SMAD4;TFAP2A
125	Wnt	miRNA	hsa-miR-15b-5p	78	64	13	2.95711	1.6362	6.13794	8.35984e-10	0.00232195	BCL9;CAMK2G;HIPK2;LRP6;MAP3K4;MAP3K7;PAX2;PPP2CA;SALL1;TFAP2A;WNT3A;WNT4;WNT7A
126	Wnt	miRNA	hsa-miR-19a-3p	78	64	13	2.95711	1.6362	6.13794	8.35984e-10	0.00232195	CAMK2G;DAAM1;DKK1;GSK3B;LRP6;MAP1B;MARK2;NLK;PRKCA;PRKCB;RUNX2;WNT1;WNT3
127	Wnt	miRNA	hsa-miR-20a-5p	78	64	13	2.95711	1.6362	6.13794	8.35984e-10	0.00232195	CAMK2G;DAB2;EP300;FZD1;FZD4;FZD7;MAGI3;MAP3K7;PPP2CA;RUNX2;SALL1;SFRP2;SMAD4
128	Wnt	miRNA	hsa-miR-27a-3p	78	64	14	2.95711	1.6362	6.74911	1.48755e-11	4.13168e-05	APC;CAMK2D;DVL2;GSK3B;HIPK2;LEF1;LRP6;MAGI3;MAP3K4;NLK;PRKCB;RAC1;SFRP2;WNT1
129	Wnt	miRNA	hsa-miR-338-5p	78	64	13	2.95711	1.6362	6.13794	8.35984e-10	0.00232195	BCL9;DKK1;DLG1;EP300;FZD7;HIPK2;LRP1;MAP1B;NLK;RUNX2;SALL1;SMAD4;TFAP2A
130	Wnt	miRNA	hsa-miR-3609	78	64	13	2.95711	1.6362	6.13794	8.35984e-10	0.00232195	CAMK2G;EP300;FZD1;FZD4;FZD7;GSK3B;HIPK2;MAGI3;NLK;PPP2CA;RHOA;SALL1;SFRP1
131	Wnt	miRNA	hsa-miR-381	78	64	16	2.95711	1.6362	7.97146	1.56811e-15	4.35543e-09	APC;CTNNB1;CUL1;DVL2;FZD5;GSK3B;LEF1;LRP5;LRP6;MAP3K7;NLK;RAC1;RHOA;RUNX2;SALL1;SFRP2
132	Wnt	miRNA	hsa-miR-495	78	64	13	2.95711	1.6362	6.13794	8.35984e-10	0.00232195	CAMK2G;DLG1;DVL2;EP300;MAGI3;MAP1B;MAP3K4;NLK;PPP2CA;PRKCB;RAC1;RUNX2;SALL1
133	Wnt	miRNA	hsa-miR-590-3p	78	64	15	2.95711	1.6362	7.36029	1.83511e-13	5.09703e-07	APC;BCL9;CSNK2A1;CUL1;DKK1;EP300;GSK3B;HIPK2;LEF1;LRP1;MAP1B;NLK;RAC1;SALL1;TFAP2A
134	Alpha6Beta4Integrin	ceRNA	ACVR1	47	25	3	0.183139	0.424449	6.63651	3.21197e-11	0.00036668	MET;PIK3CA;SMAD2
135	Alpha6Beta4Integrin	ceRNA	ATL2	47	25	5	0.183139	0.424449	11.3485	7.54459e-30	8.61293e-23	ITGA6;MET;SMAD2;YES1;YWHAQ
136	Alpha6Beta4Integrin	ceRNA	BCL11A	47	25	6	0.183139	0.424449	13.7045	9.54224e-43	1.08935e-35	EIF4E;ITGA6;MET;PIK3R3;SMAD2;VIM
137	Alpha6Beta4Integrin	ceRNA	BCL2L11	47	25	3	0.183139	0.424449	6.63651	3.21197e-11	0.00036668	PIK3CA;PIK3R3;SMAD2
138	Alpha6Beta4Integrin	ceRNA	C7orf60	47	25	4	0.183139	0.424449	8.99251	2.41648e-19	2.75866e-12	ITGA6;MET;SMAD2;YES1
139	Alpha6Beta4Integrin	ceRNA	CAB39	47	25	3	0.183139	0.424449	6.63651	3.21197e-11	0.00036668	RHOA;YES1;YWHAQ
140	Alpha6Beta4Integrin	ceRNA	CCDC88A	47	25	3	0.183139	0.424449	6.63651	3.21197e-11	0.00036668	ITGA6;MET;PIK3CA
141	Alpha6Beta4Integrin	ceRNA	CHD6	47	25	3	0.183139	0.424449	6.63651	3.21197e-11	0.00036668	EIF4E;PIK3R3;PTK2
142	Alpha6Beta4Integrin	ceRNA	CNOT6	47	25	3	0.183139	0.424449	6.63651	3.21197e-11	0.00036668	PIK3CA;SMAD2;YES1
143	Alpha6Beta4Integrin	ceRNA	COL4A3BP	47	25	3	0.183139	0.424449	6.63651	3.21197e-11	0.00036668	EIF4E;YES1;YWHAQ
144	Alpha6Beta4Integrin	ceRNA	CPEB4	47	25	3	0.183139	0.424449	6.63651	3.21197e-11	0.00036668	MET;PIK3CA;YWHAB
145	Alpha6Beta4Integrin	ceRNA	CREB1	47	25	3	0.183139	0.424449	6.63651	3.21197e-11	0.00036668	AR;ITGA6;YES1
146	Alpha6Beta4Integrin	ceRNA	CTDSPL2	47	25	4	0.183139	0.424449	8.99251	2.41648e-19	2.75866e-12	ITGA6;PRKCA;RHOA;SMAD2
147	Alpha6Beta4Integrin	ceRNA	DDX3X	47	25	3	0.183139	0.424449	6.63651	3.21197e-11	0.00036668	EIF4E;PIK3CA;YWHAQ
148	Alpha6Beta4Integrin	ceRNA	E2F3	47	25	3	0.183139	0.424449	6.63651	3.21197e-11	0.00036668	PIK3R3;YWHAQ;YWHAZ
149	Alpha6Beta4Integrin	ceRNA	ELK3	47	25	3	0.183139	0.424449	6.63651	3.21197e-11	0.00036668	ITGA6;MET;PRKCA
150	Alpha6Beta4Integrin	ceRNA	ERBB2IP	47	25	3	0.183139	0.424449	6.63651	3.21197e-11	0.00036668	EIF4E;YES1;YWHAZ
151	Alpha6Beta4Integrin	ceRNA	FMR1	47	25	4	0.183139	0.424449	8.99251	2.41648e-19	2.75866e-12	PIK3CA;PTK2;RHOA;YES1
152	Alpha6Beta4Integrin	ceRNA	GABPB1	47	25	3	0.183139	0.424449	6.63651	3.21197e-11	0.00036668	EIF4E;PIK3CA;YWHAQ
153	Alpha6Beta4Integrin	ceRNA	GJA1	47	25	3	0.183139	0.424449	6.63651	3.21197e-11	0.00036668	MET;VIM;YES1
154	Alpha6Beta4Integrin	ceRNA	KAT6A	47	25	3	0.183139	0.424449	6.63651	3.21197e-11	0.00036668	PIK3CA;PTK2;YWHAZ
155	Alpha6Beta4Integrin	ceRNA	LCOR	47	25	5	0.183139	0.424449	11.3485	7.54459e-30	8.61293e-23	EIF4E;RHOA;SMAD2;YWHAB;YWHAQ
156	Alpha6Beta4Integrin	ceRNA	MEX3B	47	25	3	0.183139	0.424449	6.63651	3.21197e-11	0.00036668	ITGA6;MET;YWHAE
157	Alpha6Beta4Integrin	ceRNA	MIER3	47	25	5	0.183139	0.424449	11.3485	7.54459e-30	8.61293e-23	PIK3CA;PTK2;SMAD2;YWHAQ;YWHAZ
158	Alpha6Beta4Integrin	ceRNA	MLL3	47	25	3	0.183139	0.424449	6.63651	3.21197e-11	0.00036668	ITGA6;SMAD2;YES1
159	Alpha6Beta4Integrin	ceRNA	NCK2	47	25	3	0.183139	0.424449	6.63651	3.21197e-11	0.00036668	AR;ITGA6;PIK3R3
160	Alpha6Beta4Integrin	ceRNA	NFIB	47	25	4	0.183139	0.424449	8.99251	2.41648e-19	2.75866e-12	AR;ITGA6;PIK3CA;YES1
161	Alpha6Beta4Integrin	ceRNA	PPM1B	47	25	3	0.183139	0.424449	6.63651	3.21197e-11	0.00036668	YES1;YWHAB;YWHAQ
162	Alpha6Beta4Integrin	ceRNA	RBMS1	47	25	3	0.183139	0.424449	6.63651	3.21197e-11	0.00036668	ITGA6;YWHAE;YWHAQ
163	Alpha6Beta4Integrin	ceRNA	RLIM	47	25	3	0.183139	0.424449	6.63651	3.21197e-11	0.00036668	AR;SMAD2;YWHAQ
164	Alpha6Beta4Integrin	ceRNA	RYBP	47	25	3	0.183139	0.424449	6.63651	3.21197e-11	0.00036668	EIF4E;YES1;YWHAB
165	Alpha6Beta4Integrin	ceRNA	SMARCAD1	47	25	3	0.183139	0.424449	6.63651	3.21197e-11	0.00036668	EIF4E;RHOA;YWHAQ
166	Alpha6Beta4Integrin	ceRNA	SUZ12	47	25	3	0.183139	0.424449	6.63651	3.21197e-11	0.00036668	EIF4E;PIK3CA;YWHAZ
167	Alpha6Beta4Integrin	ceRNA	SYNCRIP	47	25	4	0.183139	0.424449	8.99251	2.41648e-19	2.75866e-12	ITGA6;MET;YES1;YWHAZ
168	Alpha6Beta4Integrin	ceRNA	TCF4	47	25	7	0.183139	0.424449	16.0605	4.82645e-58	5.50989e-51	ITGA6;MET;PRKCA;PTK2;RHOA;YES1;YWHAQ
169	Alpha6Beta4Integrin	ceRNA	TET3	47	25	4	0.183139	0.424449	8.99251	2.41648e-19	2.75866e-12	ITGA6;PIK3R3;YES1;YWHAQ
170	Alpha6Beta4Integrin	ceRNA	TSHZ3	47	25	4	0.183139	0.424449	8.99251	2.41648e-19	2.75866e-12	MET;PIK3CA;YES1;YWHAQ
171	Alpha6Beta4Integrin	ceRNA	USP34	47	25	3	0.183139	0.424449	6.63651	3.21197e-11	0.00036668	ITGA6;PIK3CA;YES1
172	Alpha6Beta4Integrin	ceRNA	VEZF1	47	25	3	0.183139	0.424449	6.63651	3.21197e-11	0.00036668	EIF4E;PTK2;RHOA
173	Alpha6Beta4Integrin	ceRNA	YTHDF3	47	25	3	0.183139	0.424449	6.63651	3.21197e-11	0.00036668	SMAD2;YES1;YWHAZ
174	Alpha6Beta4Integrin	ceRNA	ZEB1	47	25	4	0.183139	0.424449	8.99251	2.41648e-19	2.75866e-12	ITGA6;MET;PRKCA;RHOA
175	Alpha6Beta4Integrin	ceRNA	ZNF148	47	25	3	0.183139	0.424449	6.63651	3.21197e-11	0.00036668	EIF4E;PTK2;YES1
176	AndrogenReceptor	ceRNA	ANKIB1	74	43	8	0.871905	0.910949	7.82491	5.0802e-15	5.79957e-08	APPL1;ATF2;CREBBP;EP300;GTF2H1;NCOA3;NRIP1;PTEN
177	AndrogenReceptor	ceRNA	ANKRD13C	74	43	8	0.871905	0.910949	7.82491	5.0802e-15	5.79957e-08	CREBBP;GTF2H1;KAT2B;NCOA3;PTEN;RNF4;SP1;UBE3A
178	AndrogenReceptor	ceRNA	ARID2	74	43	8	0.871905	0.910949	7.82491	5.0802e-15	5.79957e-08	ATF2;CREBBP;EP300;NRIP1;PIAS1;PTEN;SP1;TMF1
179	AndrogenReceptor	ceRNA	ARID4A	74	43	10	0.871905	0.910949	10.0204	1.24e-23	1.41559e-16	APPL1;ATF2;CREBBP;EP300;KAT2B;NCOA2;NCOA3;NR2C2;PTEN;SMAD4
180	AndrogenReceptor	ceRNA	ARID4B	74	43	8	0.871905	0.910949	7.82491	5.0802e-15	5.79957e-08	APPL1;EP300;GTF2H1;NCOA3;PTEN;RB1;SP1;UBE3A
181	AndrogenReceptor	ceRNA	ATL2	74	43	9	0.871905	0.910949	8.92267	4.55179e-19	5.19634e-12	CCND1;ESR1;GTF2H1;NCOA1;NCOA2;NCOA3;PNRC1;PTEN;RB1
182	AndrogenReceptor	ceRNA	ATP2B1	74	43	9	0.871905	0.910949	8.92267	4.55179e-19	5.19634e-12	CREBBP;EP300;GTF2H1;NCOA3;NR2C2;NRIP1;PTEN;RANBP9;SP1
183	AndrogenReceptor	ceRNA	ATRX	74	43	9	0.871905	0.910949	8.92267	4.55179e-19	5.19634e-12	APPL1;CREBBP;GTF2H1;KAT2B;NRIP1;PIAS1;PTEN;SP1;TMF1
184	AndrogenReceptor	ceRNA	ATXN1	74	43	10	0.871905	0.910949	10.0204	1.24e-23	1.41559e-16	APPL1;GTF2H1;NCOA3;NR2C2;PTEN;RANBP9;RUNX2;SMAD4;SP1;UBE3A
185	AndrogenReceptor	ceRNA	ATXN7	74	43	7	0.871905	0.910949	6.72716	1.73006e-11	0.000197504	EP300;GTF2H1;KAT2B;NCOA1;PIAS1;PTEN;TMF1
186	AndrogenReceptor	ceRNA	BACH2	74	43	8	0.871905	0.910949	7.82491	5.0802e-15	5.79957e-08	CAV1;CCND1;EP300;KAT2B;PNRC1;PTEN;RUNX2;SVIL
187	AndrogenReceptor	ceRNA	BAZ2B	74	43	8	0.871905	0.910949	7.82491	5.0802e-15	5.79957e-08	CREBBP;EP300;GTF2H1;KAT2B;NCOA1;RANBP9;SP1;TMF1
188	AndrogenReceptor	ceRNA	BBX	74	43	12	0.871905	0.910949	12.2159	2.55657e-34	2.91859e-27	APPL1;CREBBP;EP300;GTF2H1;IL6ST;NCOA1;NRIP1;PIAS1;PTEN;RB1;SMAD4;SP1
189	AndrogenReceptor	ceRNA	BCL11A	74	43	8	0.871905	0.910949	7.82491	5.0802e-15	5.79957e-08	CCND1;ESR1;KAT2B;NCOA1;NCOA3;NRIP1;PTEN;RUNX2
190	AndrogenReceptor	ceRNA	BCL2L11	74	43	7	0.871905	0.910949	6.72716	1.73006e-11	0.000197504	APPL1;GTF2H1;NCOA3;PTEN;SMAD4;SP1;UBE3A
191	AndrogenReceptor	ceRNA	BOD1L1	74	43	8	0.871905	0.910949	7.82491	5.0802e-15	5.79957e-08	APPL1;EP300;GTF2H1;KAT2B;NRIP1;PIAS1;PTEN;TMF1
192	AndrogenReceptor	ceRNA	BTBD7	74	43	9	0.871905	0.910949	8.92267	4.55179e-19	5.19634e-12	APPL1;CREBBP;GTF2H1;KAT2B;NCOA3;PTEN;RB1;SMAD4;UBE3A
193	AndrogenReceptor	ceRNA	C16orf52	74	43	7	0.871905	0.910949	6.72716	1.73006e-11	0.000197504	APPL1;CCND1;CREBBP;NCOA2;NCOA3;RUNX2;SP1
194	AndrogenReceptor	ceRNA	CCNT2	74	43	9	0.871905	0.910949	8.92267	4.55179e-19	5.19634e-12	EP300;GTF2H1;NCOA1;NCOA3;NRIP1;PIAS1;PTEN;TMF1;UBE3A
195	AndrogenReceptor	ceRNA	CDK17	74	43	16	0.871905	0.910949	16.607	6.20182e-62	7.08002e-55	APPL1;ATF2;CCND1;CREBBP;CTNNB1;EP300;ESR1;GTF2H1;KAT2B;NCOA3;NRIP1;PATZ1;PTEN;RUNX2;SMAD4;SP1
196	AndrogenReceptor	ceRNA	CELF1	74	43	7	0.871905	0.910949	6.72716	1.73006e-11	0.000197504	APPL1;GTF2H1;NCOA2;NRIP1;PIAS1;PTEN;RANBP9
197	AndrogenReceptor	ceRNA	CELF2	74	43	12	0.871905	0.910949	12.2159	2.55657e-34	2.91859e-27	ATF2;CREBBP;EP300;GTF2H1;KAT2B;NCOA2;NRIP1;PNRC1;PTEN;RB1;RUNX2;SP1
198	AndrogenReceptor	ceRNA	CEP170	74	43	7	0.871905	0.910949	6.72716	1.73006e-11	0.000197504	APPL1;EP300;GTF2H1;KAT2B;NCOA3;PTEN;RUNX2
199	AndrogenReceptor	ceRNA	CHD9	74	43	12	0.871905	0.910949	12.2159	2.55657e-34	2.91859e-27	APPL1;ATF2;EP300;GTF2H1;KAT2B;NCOA3;NR2C2;NRIP1;PTEN;RANBP9;RB1;TMF1
200	AndrogenReceptor	ceRNA	CPEB2	74	43	9	0.871905	0.910949	8.92267	4.55179e-19	5.19634e-12	ATF2;CCND1;EP300;GTF2H1;KAT2B;NCOA1;NCOA3;PTEN;UBE3A
201	AndrogenReceptor	ceRNA	CPEB3	74	43	13	0.871905	0.910949	13.3137	1.92697e-40	2.19984e-33	APPL1;ATF2;CCND1;CREBBP;KAT2B;NCOA1;NCOA3;NR2C2;NRIP1;PTEN;RB1;SMAD4;SP1
202	AndrogenReceptor	ceRNA	CPEB4	74	43	12	0.871905	0.910949	12.2159	2.55657e-34	2.91859e-27	CCND1;ESR1;GTF2H1;KAT2B;NCOA1;NCOA3;NRIP1;PNRC1;PTEN;RANBP9;SP1;UBE3A
203	AndrogenReceptor	ceRNA	CREB1	74	43	8	0.871905	0.910949	7.82491	5.0802e-15	5.79957e-08	APPL1;AR;GTF2H1;NCOA3;NR2C2;PTEN;SMAD4;SP1
204	AndrogenReceptor	ceRNA	CREBRF	74	43	15	0.871905	0.910949	15.5092	3.00601e-54	3.43167e-47	APPL1;ATF2;CREBBP;EP300;KAT2B;NCOA2;NCOA3;NR2C2;NRIP1;PNRC1;PTEN;RB1;SMAD4;SP1;UBE3A
205	AndrogenReceptor	ceRNA	CTDSPL2	74	43	13	0.871905	0.910949	13.3137	1.92697e-40	2.19984e-33	CREBBP;EP300;GTF2H1;NCOA1;NCOA3;NRIP1;NSD1;PTEN;RANBP9;RB1;SMAD4;SP1;TMF1
206	AndrogenReceptor	ceRNA	CUL3	74	43	7	0.871905	0.910949	6.72716	1.73006e-11	0.000197504	APPL1;GTF2H1;NCOA3;NR2C2;PTEN;STAT3;UBE3A
207	AndrogenReceptor	ceRNA	DDX3X	74	43	10	0.871905	0.910949	10.0204	1.24e-23	1.41559e-16	ATF2;EP300;GTF2H1;KAT2B;NCOA3;NRIP1;PTEN;RANBP9;SP1;TMF1
208	AndrogenReceptor	ceRNA	DICER1	74	43	7	0.871905	0.910949	6.72716	1.73006e-11	0.000197504	APPL1;CCND1;NCOA1;NCOA3;NSD1;PTEN;SP1
209	AndrogenReceptor	ceRNA	DIP2C	74	43	7	0.871905	0.910949	6.72716	1.73006e-11	0.000197504	APPL1;CREBBP;EP300;NCOA3;PTEN;SMAD4;SP1
210	AndrogenReceptor	ceRNA	DYRK2	74	43	7	0.871905	0.910949	6.72716	1.73006e-11	0.000197504	APPL1;KAT2B;NCOA3;NR2C2;PTEN;RUNX2;SP1
211	AndrogenReceptor	ceRNA	EIF2C1	74	43	7	0.871905	0.910949	6.72716	1.73006e-11	0.000197504	APPL1;AR;IL6ST;NCOA3;PTEN;SP1;UBE3A
212	AndrogenReceptor	ceRNA	ELK3	74	43	12	0.871905	0.910949	12.2159	2.55657e-34	2.91859e-27	APPL1;CAV1;CREBBP;EP300;GTF2H1;NCOA3;NR2C2;PTEN;RB1;RUNX2;SMAD4;SP1
213	AndrogenReceptor	ceRNA	EP300	74	43	10	0.871905	0.910949	10.0204	1.24e-23	1.41559e-16	ATF2;CREBBP;GTF2H1;KAT2B;NRIP1;PIAS1;PTEN;RB1;SP1;STAT3
214	AndrogenReceptor	ceRNA	EPS15	74	43	7	0.871905	0.910949	6.72716	1.73006e-11	0.000197504	ATF2;EP300;GTF2H1;KAT2B;PNRC1;PTEN;STAT3
215	AndrogenReceptor	ceRNA	ERBB2IP	74	43	8	0.871905	0.910949	7.82491	5.0802e-15	5.79957e-08	APPL1;CCND1;CREBBP;NCOA3;PTEN;SMAD4;SP1;UBE3A
216	AndrogenReceptor	ceRNA	ETF1	74	43	7	0.871905	0.910949	6.72716	1.73006e-11	0.000197504	CREBBP;EP300;GTF2H1;NCOA3;PIAS1;PTEN;TMF1
217	AndrogenReceptor	ceRNA	FAM179B	74	43	7	0.871905	0.910949	6.72716	1.73006e-11	0.000197504	APPL1;AR;NCOA1;NCOA2;NCOA3;PTEN;SMAD4
218	AndrogenReceptor	ceRNA	FBXW11	74	43	8	0.871905	0.910949	7.82491	5.0802e-15	5.79957e-08	APPL1;GTF2H1;IL6ST;KAT2B;NCOA1;PTEN;RANBP9;SP1
219	AndrogenReceptor	ceRNA	FMR1	74	43	10	0.871905	0.910949	10.0204	1.24e-23	1.41559e-16	CREBBP;EP300;GTF2H1;KAT2B;NCOA1;NCOA3;PTEN;SP1;TMF1;UBE3A
220	AndrogenReceptor	ceRNA	FNDC3B	74	43	8	0.871905	0.910949	7.82491	5.0802e-15	5.79957e-08	KAT2B;NCOA3;PNRC1;PTEN;RUNX2;SMAD4;SP1;STAT3
221	AndrogenReceptor	ceRNA	FOXJ3	74	43	9	0.871905	0.910949	8.92267	4.55179e-19	5.19634e-12	APPL1;ATF2;EP300;GTF2H1;KAT2B;NCOA3;NR2C2;PTEN;SMAD4
222	AndrogenReceptor	ceRNA	FOXN3	74	43	7	0.871905	0.910949	6.72716	1.73006e-11	0.000197504	EP300;NCOA3;PTEN;RUNX2;SMAD4;SP1;SVIL
223	AndrogenReceptor	ceRNA	FOXP1	74	43	8	0.871905	0.910949	7.82491	5.0802e-15	5.79957e-08	ESR1;NCOA1;PTEN;RB1;RUNX2;SMAD4;SP1;SVIL
224	AndrogenReceptor	ceRNA	FRS2	74	43	9	0.871905	0.910949	8.92267	4.55179e-19	5.19634e-12	APPL1;CCND1;GTF2H1;NCOA1;NCOA3;PTEN;RB1;SP1;STAT3
225	AndrogenReceptor	ceRNA	G3BP2	74	43	7	0.871905	0.910949	6.72716	1.73006e-11	0.000197504	APPL1;AR;GTF2H1;IL6ST;NCOA3;PTEN;UBE3A
226	AndrogenReceptor	ceRNA	GABPB1	74	43	8	0.871905	0.910949	7.82491	5.0802e-15	5.79957e-08	CREBBP;EP300;NCOA3;NR2C2;PIAS1;PTEN;SMAD4;UBE3A
227	AndrogenReceptor	ceRNA	GSK3B	74	43	7	0.871905	0.910949	6.72716	1.73006e-11	0.000197504	CREBBP;EP300;NCOA1;NRIP1;PIAS1;SMAD4;SP1
228	AndrogenReceptor	ceRNA	HIAT1	74	43	9	0.871905	0.910949	8.92267	4.55179e-19	5.19634e-12	ATF2;CREBBP;EP300;GTF2H1;KAT2B;NCOA1;NRIP1;PTEN;UBE3A
229	AndrogenReceptor	ceRNA	HIPK1	74	43	7	0.871905	0.910949	6.72716	1.73006e-11	0.000197504	EP300;KAT2B;NCOA1;NRIP1;PTEN;RANBP9;TMF1
230	AndrogenReceptor	ceRNA	HMBOX1	74	43	11	0.871905	0.910949	11.1182	1.02315e-28	1.16803e-21	EP300;GTF2H1;KAT2B;NCOA1;NCOA3;PIAS1;PIAS3;RNF4;SMAD4;SP1;TMF1
231	AndrogenReceptor	ceRNA	IKZF4	74	43	7	0.871905	0.910949	6.72716	1.73006e-11	0.000197504	APPL1;GTF2H1;IL6ST;NCOA1;NCOA3;RB1;SP1
232	AndrogenReceptor	ceRNA	INO80D	74	43	8	0.871905	0.910949	7.82491	5.0802e-15	5.79957e-08	CREBBP;EP300;NCOA2;NRIP1;PTEN;RUNX2;SMAD4;SP1
233	AndrogenReceptor	ceRNA	KAT6A	74	43	7	0.871905	0.910949	6.72716	1.73006e-11	0.000197504	EP300;GTF2H1;KAT2B;NCOA1;NCOA3;PTEN;UBE3A
234	AndrogenReceptor	ceRNA	KIAA0240	74	43	9	0.871905	0.910949	8.92267	4.55179e-19	5.19634e-12	CREBBP;EP300;KAT2B;PIAS1;PTEN;RNF4;SP1;TMF1;UBE3A
235	AndrogenReceptor	ceRNA	KPNA3	74	43	9	0.871905	0.910949	8.92267	4.55179e-19	5.19634e-12	APPL1;CREBBP;GTF2H1;NCOA3;PTEN;RANBP9;SMAD4;SP1;UBE3A
236	AndrogenReceptor	ceRNA	LARP4B	74	43	8	0.871905	0.910949	7.82491	5.0802e-15	5.79957e-08	ATF2;CREBBP;EP300;NCOA3;PTEN;SMAD4;SP1;UBE3A
237	AndrogenReceptor	ceRNA	LCOR	74	43	17	0.871905	0.910949	17.7047	3.85731e-70	4.40352e-63	APPL1;CCND1;CREBBP;GTF2H1;KAT2B;NCOA1;NCOA2;NCOA3;NR2C2;NRIP1;NSD1;PTEN;RB1;SMAD4;SP1;TMF1;UBE3A
238	AndrogenReceptor	ceRNA	LCORL	74	43	12	0.871905	0.910949	12.2159	2.55657e-34	2.91859e-27	ATF2;CREBBP;EP300;GTF2H1;NCOA1;NCOA3;NR2C2;NRIP1;PIAS1;PTEN;SMAD4;SP1
239	AndrogenReceptor	ceRNA	LRCH1	74	43	9	0.871905	0.910949	8.92267	4.55179e-19	5.19634e-12	APPL1;GTF2H1;IL6ST;NCOA1;NCOA3;PTEN;RUNX2;SMAD4;SP1
240	AndrogenReceptor	ceRNA	MAML1	74	43	7	0.871905	0.910949	6.72716	1.73006e-11	0.000197504	AR;GTF2H1;NCOA1;NCOA3;NRIP1;PTEN;STAT3
241	AndrogenReceptor	ceRNA	MAP3K1	74	43	10	0.871905	0.910949	10.0204	1.24e-23	1.41559e-16	CCND1;CREBBP;EP300;NCOA1;NCOA3;PTEN;RANBP9;RB1;SMAD4;UBE3A
242	AndrogenReceptor	ceRNA	MBNL1	74	43	7	0.871905	0.910949	6.72716	1.73006e-11	0.000197504	APPL1;KAT2B;NCOA3;PNRC1;PTEN;RUNX2;SMAD4
243	AndrogenReceptor	ceRNA	MED13	74	43	11	0.871905	0.910949	11.1182	1.02315e-28	1.16803e-21	APPL1;ATF2;EP300;NCOA1;NR2C2;NRIP1;PATZ1;PTEN;RB1;SMAD4;SP1
244	AndrogenReceptor	ceRNA	MIER3	74	43	14	0.871905	0.910949	14.4114	4.38726e-47	5.00851e-40	APPL1;CTNNB1;EP300;ESR1;GTF2H1;KAT2B;NCOA3;PTEN;RANBP9;RB1;SP1;STAT3;TMF1;UBE3A
245	AndrogenReceptor	ceRNA	MLL3	74	43	12	0.871905	0.910949	12.2159	2.55657e-34	2.91859e-27	APPL1;CREBBP;EP300;GTF2H1;NCOA2;NCOA3;NR2C2;PIAS1;PIAS3;PTEN;RB1;UBE3A
246	AndrogenReceptor	ceRNA	MTF1	74	43	11	0.871905	0.910949	11.1182	1.02315e-28	1.16803e-21	APPL1;CREBBP;GTF2H1;IL6ST;NCOA3;NR2C2;PTEN;RNF4;SP1;STAT3;UBE3A
247	AndrogenReceptor	ceRNA	NBEA	74	43	8	0.871905	0.910949	7.82491	5.0802e-15	5.79957e-08	CALR;EP300;GTF2H1;NCOA1;PIAS1;RB1;SMAD4;SP1
248	AndrogenReceptor	ceRNA	NPAT	74	43	7	0.871905	0.910949	6.72716	1.73006e-11	0.000197504	APPL1;ATF2;EP300;PTEN;RB1;SMAD4;UBE3A
249	AndrogenReceptor	ceRNA	NUFIP2	74	43	10	0.871905	0.910949	10.0204	1.24e-23	1.41559e-16	APPL1;CREBBP;GTF2H1;KAT2B;NCOA3;NR2C2;NRIP1;PTEN;RANBP9;SP1
250	AndrogenReceptor	ceRNA	OTUD4	74	43	15	0.871905	0.910949	15.5092	3.00601e-54	3.43167e-47	APPL1;CREBBP;CTNNB1;EP300;GTF2H1;NCOA3;NR2C2;NRIP1;PTEN;RB1;SMAD4;SP1;STAT3;TMF1;UBE3A
251	AndrogenReceptor	ceRNA	PAFAH1B1	74	43	7	0.871905	0.910949	6.72716	1.73006e-11	0.000197504	APPL1;CCND1;GTF2H1;IL6ST;NCOA3;PTEN;SMAD4
252	AndrogenReceptor	ceRNA	PDS5A	74	43	12	0.871905	0.910949	12.2159	2.55657e-34	2.91859e-27	APPL1;CREBBP;EP300;NCOA1;NCOA3;NRIP1;PIAS1;PTEN;RANBP9;RNF4;SMAD4;UBE3A
253	AndrogenReceptor	ceRNA	PHTF2	74	43	7	0.871905	0.910949	6.72716	1.73006e-11	0.000197504	EP300;GTF2H1;NCOA2;NCOA3;RANBP9;RUNX2;SMAD4
254	AndrogenReceptor	ceRNA	PIKFYVE	74	43	8	0.871905	0.910949	7.82491	5.0802e-15	5.79957e-08	APPL1;EP300;GTF2H1;IL6ST;KAT2B;NCOA3;PTEN;SP1
255	AndrogenReceptor	ceRNA	PPM1B	74	43	8	0.871905	0.910949	7.82491	5.0802e-15	5.79957e-08	ATF2;CREBBP;CTNNB1;NCOA2;NRIP1;PTEN;RANBP9;SP1
256	AndrogenReceptor	ceRNA	PPP1R12A	74	43	7	0.871905	0.910949	6.72716	1.73006e-11	0.000197504	APPL1;GTF2H1;NCOA1;NCOA2;NRIP1;RANBP9;RUNX2
257	AndrogenReceptor	ceRNA	PPP2R5E	74	43	8	0.871905	0.910949	7.82491	5.0802e-15	5.79957e-08	ATF2;EP300;GTF2H1;NCOA2;NRIP1;PIAS1;RANBP9;TMF1
258	AndrogenReceptor	ceRNA	PPP6C	74	43	8	0.871905	0.910949	7.82491	5.0802e-15	5.79957e-08	ATF2;CCND1;CREBBP;EP300;KAT2B;PATZ1;PTEN;UBE3A
259	AndrogenReceptor	ceRNA	PTEN	74	43	10	0.871905	0.910949	10.0204	1.24e-23	1.41559e-16	ATF2;CREBBP;EP300;KAT2B;NCOA1;NCOA3;NR2C2;RB1;RUNX2;UBE3A
260	AndrogenReceptor	ceRNA	RB1CC1	74	43	8	0.871905	0.910949	7.82491	5.0802e-15	5.79957e-08	APPL1;GTF2H1;NCOA3;PIAS1;PTEN;STAT3;TMF1;UBE3A
261	AndrogenReceptor	ceRNA	RBL2	74	43	7	0.871905	0.910949	6.72716	1.73006e-11	0.000197504	APPL1;KAT2B;NCOA3;NR2C2;PTEN;RB1;UBE3A
262	AndrogenReceptor	ceRNA	RBM27	74	43	10	0.871905	0.910949	10.0204	1.24e-23	1.41559e-16	ATF2;CREBBP;EP300;KAT2B;NCOA1;NCOA2;NCOA3;PTEN;RANBP9;RNF4
263	AndrogenReceptor	ceRNA	REV3L	74	43	7	0.871905	0.910949	6.72716	1.73006e-11	0.000197504	ATF2;EP300;GTF2H1;KAT2B;PIAS1;PTEN;SP1
264	AndrogenReceptor	ceRNA	RFX7	74	43	10	0.871905	0.910949	10.0204	1.24e-23	1.41559e-16	GTF2H1;KAT2B;NCOA1;NCOA3;NRIP1;PTEN;RANBP9;RB1;SP1;TMF1
265	AndrogenReceptor	ceRNA	RLIM	74	43	9	0.871905	0.910949	8.92267	4.55179e-19	5.19634e-12	APPL1;AR;GTF2H1;IL6ST;NCOA3;NR2C2;SMAD4;SP1;STAT3
266	AndrogenReceptor	ceRNA	RNF38	74	43	10	0.871905	0.910949	10.0204	1.24e-23	1.41559e-16	APPL1;ATF2;CREBBP;IL6ST;KAT2B;NCOA1;NR2C2;PTEN;SP1;UBE3A
267	AndrogenReceptor	ceRNA	ROCK2	74	43	7	0.871905	0.910949	6.72716	1.73006e-11	0.000197504	APPL1;IL6ST;NCOA3;NR2C2;PTEN;SMAD4;SP1
268	AndrogenReceptor	ceRNA	RORA	74	43	7	0.871905	0.910949	6.72716	1.73006e-11	0.000197504	APPL1;KAT2B;NCOA2;NCOA3;NR2C2;PTEN;SMAD4
269	AndrogenReceptor	ceRNA	RSBN1	74	43	12	0.871905	0.910949	12.2159	2.55657e-34	2.91859e-27	CREBBP;EP300;GTF2H1;NCOA1;NCOA3;NR2C2;NRIP1;PTEN;RNF4;SP1;TMF1;UBE3A
270	AndrogenReceptor	ceRNA	RUFY2	74	43	9	0.871905	0.910949	8.92267	4.55179e-19	5.19634e-12	APPL1;EP300;GTF2H1;IL6ST;NCOA1;PTEN;RB1;STAT3;UBE3A
271	AndrogenReceptor	ceRNA	RYBP	74	43	7	0.871905	0.910949	6.72716	1.73006e-11	0.000197504	APPL1;ATF2;NCOA1;NCOA3;NRIP1;PTEN;SP1
272	AndrogenReceptor	ceRNA	SERTAD2	74	43	7	0.871905	0.910949	6.72716	1.73006e-11	0.000197504	ATF2;GTF2H1;NCOA1;NCOA3;PTEN;SP1;UBE3A
273	AndrogenReceptor	ceRNA	SETD1B	74	43	9	0.871905	0.910949	8.92267	4.55179e-19	5.19634e-12	ATF2;CREBBP;EP300;GTF2H1;NCOA1;NCOR2;PTEN;RANBP9;TMF1
274	AndrogenReceptor	ceRNA	SMAD5	74	43	7	0.871905	0.910949	6.72716	1.73006e-11	0.000197504	APPL1;EP300;GTF2H1;NCOA1;NCOA3;PTEN;TMF1
275	AndrogenReceptor	ceRNA	SP3	74	43	7	0.871905	0.910949	6.72716	1.73006e-11	0.000197504	CREBBP;EP300;KAT2B;NCOA1;PIAS1;TMF1;UBE3A
276	AndrogenReceptor	ceRNA	SP4	74	43	11	0.871905	0.910949	11.1182	1.02315e-28	1.16803e-21	APPL1;CREBBP;ETV5;GTF2H1;NCOA1;NCOA2;NCOA3;NRIP1;PTEN;RANBP9;SMAD4
277	AndrogenReceptor	ceRNA	SPTY2D1	74	43	7	0.871905	0.910949	6.72716	1.73006e-11	0.000197504	APPL1;GTF2H1;IL6ST;NCOA1;NCOA3;PTEN;SP1
278	AndrogenReceptor	ceRNA	SRPK2	74	43	8	0.871905	0.910949	7.82491	5.0802e-15	5.79957e-08	ATF2;EP300;GTF2H1;NCOA1;PTEN;RNF4;SP1;TMF1
279	AndrogenReceptor	ceRNA	STAG2	74	43	8	0.871905	0.910949	7.82491	5.0802e-15	5.79957e-08	APPL1;KAT2B;NCOA1;NCOA2;NCOA3;NRIP1;PIAS1;TMF1
280	AndrogenReceptor	ceRNA	SYNCRIP	74	43	16	0.871905	0.910949	16.607	6.20182e-62	7.08002e-55	APPL1;ATF2;CREBBP;EP300;GTF2H1;KAT2B;NCOA2;NCOA3;NSD1;PNRC1;RAN;RANBP9;RB1;SMAD4;SP1;UBE3A
281	AndrogenReceptor	ceRNA	TCF4	74	43	14	0.871905	0.910949	14.4114	4.38726e-47	5.00851e-40	ATF2;CAV1;CREBBP;EP300;ESR1;ETV5;GTF2H1;KAT2B;NCOA1;NCOA3;PTEN;RUNX2;SIN3A;SP1
282	AndrogenReceptor	ceRNA	TET2	74	43	9	0.871905	0.910949	8.92267	4.55179e-19	5.19634e-12	CREBBP;EP300;GTF2H1;KAT2B;NCOA3;PTEN;RB1;SP1;UBE3A
283	AndrogenReceptor	ceRNA	TET3	74	43	10	0.871905	0.910949	10.0204	1.24e-23	1.41559e-16	APPL1;CREBBP;NCOA1;NCOA3;NR2C2;PTEN;RB1;SMAD4;SP1;UBE3A
284	AndrogenReceptor	ceRNA	TNPO1	74	43	10	0.871905	0.910949	10.0204	1.24e-23	1.41559e-16	ATF2;EP300;GTF2H1;KAT2B;NCOA1;NRIP1;PIAS1;PTEN;RANBP9;SP1
285	AndrogenReceptor	ceRNA	TNRC6A	74	43	9	0.871905	0.910949	8.92267	4.55179e-19	5.19634e-12	APPL1;CREBBP;EP300;GTF2H1;NCOA3;PTEN;RUNX2;SMAD4;UBE3A
286	AndrogenReceptor	ceRNA	TRAPPC8	74	43	7	0.871905	0.910949	6.72716	1.73006e-11	0.000197504	ATF2;CREBBP;EP300;NCOA2;PTEN;RANBP9;SP1
287	AndrogenReceptor	ceRNA	TRIM37	74	43	7	0.871905	0.910949	6.72716	1.73006e-11	0.000197504	APPL1;GTF2H1;IL6ST;NCOA3;PTEN;STAT3;UBE3A
288	AndrogenReceptor	ceRNA	UBE2W	74	43	9	0.871905	0.910949	8.92267	4.55179e-19	5.19634e-12	APPL1;CREBBP;EP300;KAT2B;NCOA3;NRIP1;SMAD4;SP1;TMF1
289	AndrogenReceptor	ceRNA	USP25	74	43	8	0.871905	0.910949	7.82491	5.0802e-15	5.79957e-08	APPL1;ATF2;EP300;GTF2H1;PIAS1;PTEN;STAT3;TMF1
290	AndrogenReceptor	ceRNA	VEZF1	74	43	12	0.871905	0.910949	12.2159	2.55657e-34	2.91859e-27	APPL1;CREBBP;EP300;GTF2H1;KAT2B;NCOA1;PIAS1;PTEN;RANBP9;RNF4;SP1;TMF1
291	AndrogenReceptor	ceRNA	WDFY3	74	43	8	0.871905	0.910949	7.82491	5.0802e-15	5.79957e-08	CCND1;GTF2H1;KAT2B;NCOA2;NCOA3;RB1;SP1;UBE3A
292	AndrogenReceptor	ceRNA	WDR47	74	43	7	0.871905	0.910949	6.72716	1.73006e-11	0.000197504	APPL1;EP300;GTF2H1;PIAS1;PTEN;SP1;TMF1
293	AndrogenReceptor	ceRNA	WNK1	74	43	7	0.871905	0.910949	6.72716	1.73006e-11	0.000197504	CREBBP;EP300;GTF2H1;NCOA3;NR2C2;PTEN;UBE3A
294	AndrogenReceptor	ceRNA	YTHDF3	74	43	15	0.871905	0.910949	15.5092	3.00601e-54	3.43167e-47	ATF2;CREBBP;EP300;GTF2H1;KAT2B;NCOA2;NCOA3;NRIP1;PTEN;RANBP9;RB1;SMAD4;SP1;SVIL;UBE3A
295	AndrogenReceptor	ceRNA	ZBTB34	74	43	8	0.871905	0.910949	7.82491	5.0802e-15	5.79957e-08	ATF2;CREBBP;EP300;GTF2H1;NCOA2;NRIP1;PTEN;SIN3A
296	AndrogenReceptor	ceRNA	ZDHHC17	74	43	7	0.871905	0.910949	6.72716	1.73006e-11	0.000197504	EP300;KAT2B;NRIP1;PTEN;RUNX2;SP1;TMF1
297	AndrogenReceptor	ceRNA	ZEB1	74	43	7	0.871905	0.910949	6.72716	1.73006e-11	0.000197504	ATF2;CREBBP;KAT2B;NCOA2;NRIP1;PTEN;SP1
298	AndrogenReceptor	ceRNA	ZEB2	74	43	11	0.871905	0.910949	11.1182	1.02315e-28	1.16803e-21	CAV1;EP300;KAT2B;NCOA1;NCOA3;PNRC1;PTEN;RANBP9;RUNX2;SMAD4;SP1
299	AndrogenReceptor	ceRNA	ZFHX3	74	43	9	0.871905	0.910949	8.92267	4.55179e-19	5.19634e-12	ATF2;CREBBP;NCOA1;NRIP1;PTEN;RANBP9;RUNX2;SP1;UBE3A
300	AndrogenReceptor	ceRNA	ZFHX4	74	43	7	0.871905	0.910949	6.72716	1.73006e-11	0.000197504	ATF2;CREBBP;KAT2B;NCOA3;PTEN;RUNX2;UBE3A
301	AndrogenReceptor	ceRNA	ZFPM2	74	43	11	0.871905	0.910949	11.1182	1.02315e-28	1.16803e-21	CREBBP;EP300;GTF2H1;KAT2B;NCOA1;NCOA3;PNRC1;PTEN;RB1;RUNX2;SP1
302	AndrogenReceptor	ceRNA	ZFX	74	43	10	0.871905	0.910949	10.0204	1.24e-23	1.41559e-16	CREBBP;EP300;GTF2H1;KAT2B;NCOA3;NRIP1;PIAS1;PTEN;SP1;TMF1
303	AndrogenReceptor	ceRNA	ZFYVE26	74	43	7	0.871905	0.910949	6.72716	1.73006e-11	0.000197504	EP300;GTF2H1;NCOA3;NSD1;PTEN;RB1;STAT3
304	AndrogenReceptor	ceRNA	ZNF148	74	43	17	0.871905	0.910949	17.7047	3.85731e-70	4.40352e-63	APPL1;EP300;GTF2H1;KAT2B;NCOA3;NR2C2;NRIP1;PIAS1;PTEN;RANBP9;RB1;RNF4;SIN3A;SMAD4;SP1;STAT3;TMF1
305	AndrogenReceptor	ceRNA	ZNF800	74	43	7	0.871905	0.910949	6.72716	1.73006e-11	0.000197504	APPL1;GTF2H1;NCOA3;PTEN;SMAD4;SP1;SVIL
306	EGFR1	ceRNA	ACVR1	134	77	9	1.40741	1.15521	6.5725	4.94774e-11	0.000564836	ASAP1;FOXO1;JAK1;KRAS;MAP3K2;PIK3CA;RASA1;RPS6KA3;SMAD2
307	EGFR1	ceRNA	AFF4	134	77	13	1.40741	1.15521	10.0351	1.06851e-23	1.21981e-16	ABI1;CDC42;CEBPA;CREB1;CTNND1;EPS8;GAB1;MAP2K1;NRAS;PKN2;RPS6KA3;SHOC2;SOS1
308	EGFR1	ceRNA	ANKIB1	134	77	13	1.40741	1.15521	10.0351	1.06851e-23	1.21981e-16	ABI1;CDC42;CREB1;GAB1;KRAS;MAPK1;PRKAR1A;PTPN12;RAB5A;RASA1;SHOC2;SOS1;WASL
309	EGFR1	ceRNA	ANKRA2	134	77	9	1.40741	1.15521	6.5725	4.94774e-11	0.000564836	ABI1;ATF1;KRAS;MAP3K2;PKN2;PRKAR1A;RBBP7;VAV3;WASL
310	EGFR1	ceRNA	ANKRD13C	134	77	10	1.40741	1.15521	7.43815	1.02105e-13	1.16563e-06	ABI1;CREB1;EPS15;JAK1;MAP3K2;MAPK1;PIK3CA;PKN2;RALBP1;SP1
311	EGFR1	ceRNA	ANKRD50	134	77	12	1.40741	1.15521	9.16944	4.75483e-20	5.42813e-13	ABI1;ASAP1;CREB1;CRK;JAK1;KRAS;MAP3K2;MAP3K4;PIK3CA;PKN2;PTPN12;SOS1
312	EGFR1	ceRNA	ARID2	134	77	9	1.40741	1.15521	6.5725	4.94774e-11	0.000564836	CDC42;EPS15;PKN2;PTPN12;RAB5A;RASA1;SHOC2;SOS1;SP1
313	EGFR1	ceRNA	ARID4A	134	77	12	1.40741	1.15521	9.16944	4.75483e-20	5.42813e-13	ASAP1;ATF1;CREB1;CRK;FOXO1;GAB1;KRAS;MAP3K2;PKN2;PRKAR1A;PTPN12;SOS1
314	EGFR1	ceRNA	ARID4B	134	77	17	1.40741	1.15521	13.4977	1.61335e-41	1.84181e-34	ABI1;ASAP1;CBLB;CREB1;CRK;KRAS;MAP3K2;MAPK1;PIK3CA;PKN2;PTPN12;RAB5A;RASA1;SHOC2;SMAD2;SOS1;SP1
315	EGFR1	ceRNA	ARID5B	134	77	11	1.40741	1.15521	8.3038	1.00833e-16	1.15111e-09	ASAP1;CREB1;FOXO1;KRAS;MAP3K2;MAP3K4;MAPK1;PIK3CA;PKN2;PRKAR1A;SP1
316	EGFR1	ceRNA	ASH1L	134	77	10	1.40741	1.15521	7.43815	1.02105e-13	1.16563e-06	ABI1;CRK;CTNND1;JAK1;KRAS;MAP3K4;PKN2;RAB5A;SOS1;SP1
317	EGFR1	ceRNA	ATAD2B	134	77	11	1.40741	1.15521	8.3038	1.00833e-16	1.15111e-09	ABI1;ASAP1;ATF1;CDC42;CREB1;KRAS;MAP3K2;NRAS;PRKAR1A;RASA1;SMAD2
318	EGFR1	ceRNA	ATL2	134	77	12	1.40741	1.15521	9.16944	4.75483e-20	5.42813e-13	ABI1;ASAP1;CREB1;JAK1;KRAS;MAPK1;NCK2;PKN2;RASA1;SHOC2;SMAD2;VAV3
319	EGFR1	ceRNA	ATP2B1	134	77	14	1.40741	1.15521	10.9007	1.14374e-27	1.3057e-20	ABI1;ASAP1;ATF1;CBLB;CDC42;CREB1;CTNND1;FOXO1;MAP3K2;MAPK1;NRAS;PKN2;RASA1;SP1
320	EGFR1	ceRNA	ATRX	134	77	15	1.40741	1.15521	11.7664	5.81536e-32	6.63883e-25	ABI1;CDC42;CREB1;EPS15;EPS8;FOXO1;KRAS;MAPK1;PTPN12;RAB5A;RASA1;SHOC2;SOS1;SP1;WASL
321	EGFR1	ceRNA	ATXN1	134	77	18	1.40741	1.15521	14.3633	8.79381e-47	1.0039e-39	ABI1;ASAP1;CREB1;EPS15;GJA1;JAK1;KLF11;KRAS;MAP3K2;MAP3K3;PKN2;PRKAR1A;PTPN12;SHOC2;SMAD2;SOS1;SP1;VAV3
322	EGFR1	ceRNA	ATXN1L	134	77	9	1.40741	1.15521	6.5725	4.94774e-11	0.000564836	CDC42;CREB1;CTNND1;JAK1;MAP2K1;MAP3K3;MAPK1;NRAS;RPS6KA3
323	EGFR1	ceRNA	BACH2	134	77	9	1.40741	1.15521	6.5725	4.94774e-11	0.000564836	CAV1;CDC42;EPS15;FOXO1;MAPK1;PITPNA;RAC1;RPS6KA3;SOS1
324	EGFR1	ceRNA	BAZ2B	134	77	12	1.40741	1.15521	9.16944	4.75483e-20	5.42813e-13	ATF1;CBLB;CDC42;CREB1;EPS15;KRAS;MAP3K4;PRKD1;PTPN11;SHOC2;SOS1;SP1
325	EGFR1	ceRNA	BBX	134	77	14	1.40741	1.15521	10.9007	1.14374e-27	1.3057e-20	ABI1;ASAP1;CREB1;CRK;EPS15;KRAS;MAP3K2;PKN2;PTPN12;RAB5A;RASA1;SHOC2;SOS1;SP1
326	EGFR1	ceRNA	BCL11A	134	77	18	1.40741	1.15521	14.3633	8.79381e-47	1.0039e-39	ABI1;CBLB;CDC42;CREB1;FOXO1;GJA1;KRAS;MAP3K2;MAP3K4;PIK3R3;PRKAR1A;PRKCB;RPS6KA3;SH3KBP1;SMAD2;SOS1;SPRY2;WASL
327	EGFR1	ceRNA	BCL2L11	134	77	13	1.40741	1.15521	10.0351	1.06851e-23	1.21981e-16	ABI1;ASAP1;CREB1;KRAS;MAP3K2;MAPK1;PIK3CA;PIK3R3;PKN2;PTPN12;SMAD2;SOS1;SP1
328	EGFR1	ceRNA	BNC2	134	77	13	1.40741	1.15521	10.0351	1.06851e-23	1.21981e-16	ASAP1;CREB1;FOXO1;GJA1;JAK1;KLF11;KRAS;MAP3K2;PIK3CA;PRKAR1A;PRKCB;RPS6KA3;SH3KBP1
329	EGFR1	ceRNA	BOD1L1	134	77	11	1.40741	1.15521	8.3038	1.00833e-16	1.15111e-09	ATF1;CREB1;EPS15;KRAS;MAP3K2;PKN2;PTPN12;RAB5A;SHOC2;SOS1;WASL
330	EGFR1	ceRNA	BRWD1	134	77	11	1.40741	1.15521	8.3038	1.00833e-16	1.15111e-09	ABI1;CREB1;EPS15;MAP3K2;PKN2;RASA1;RBBP7;SHOC2;SMAD2;SOS1;WASL
331	EGFR1	ceRNA	BRWD3	134	77	9	1.40741	1.15521	6.5725	4.94774e-11	0.000564836	ASAP1;CREB1;EPS15;KRAS;MAP3K2;RASA1;SMAD2;SOS1;WASL
332	EGFR1	ceRNA	BTAF1	134	77	9	1.40741	1.15521	6.5725	4.94774e-11	0.000564836	ABI1;EPS15;FOXO1;MAP3K4;MAPK1;RASA1;SHOC2;SOS1;WASL
333	EGFR1	ceRNA	BTBD7	134	77	12	1.40741	1.15521	9.16944	4.75483e-20	5.42813e-13	ABI1;CREB1;CRK;JAK1;KRAS;MAP3K2;MAPK1;PIK3CA;PKN2;RAB5A;RPS6KA3;SOS1
334	EGFR1	ceRNA	C11orf30	134	77	9	1.40741	1.15521	6.5725	4.94774e-11	0.000564836	ABI1;CREB1;CRK;KRAS;MAP3K2;MAPK1;PIK3CA;PKN2;SP1
335	EGFR1	ceRNA	C16orf52	134	77	14	1.40741	1.15521	10.9007	1.14374e-27	1.3057e-20	ABI1;ASAP1;CDC42;CREB1;EPS15;KRAS;MAP3K4;PKN2;PRKAR1A;RAF1;SHOC2;SOS1;SP1;WASL
336	EGFR1	ceRNA	C5orf24	134	77	13	1.40741	1.15521	10.0351	1.06851e-23	1.21981e-16	ABI1;CDC42;CTNND1;EPS15;KRAS;MAP2K1;MAP3K4;MAPK1;PIK3CA;PTPN12;SHOC2;SOS1;SP1
337	EGFR1	ceRNA	C7orf60	134	77	18	1.40741	1.15521	14.3633	8.79381e-47	1.0039e-39	ABI1;ASAP1;CREB1;EPS15;GAB1;JAK1;KLF11;KRAS;MAP3K2;MAP3K4;PKN2;PTPN12;RASA1;RPS6KA3;SMAD2;SOS1;SP1;WASL
338	EGFR1	ceRNA	CAMSAP2	134	77	11	1.40741	1.15521	8.3038	1.00833e-16	1.15111e-09	ABI1;CREB1;CTNND1;GAB1;KRAS;MAP3K2;RAB5A;RASA1;SOS1;SP1;WASL
339	EGFR1	ceRNA	CAND1	134	77	9	1.40741	1.15521	6.5725	4.94774e-11	0.000564836	CDC42;EPS15;KRAS;PIK3CA;PRKAR1A;SHOC2;SMAD2;SOS1;SP1
340	EGFR1	ceRNA	CCNT2	134	77	9	1.40741	1.15521	6.5725	4.94774e-11	0.000564836	ABI1;CRK;EPS15;JAK1;MAP3K2;PKN2;PTPN12;RAB5A;SOS1
341	EGFR1	ceRNA	CDK17	134	77	20	1.40741	1.15521	16.0946	2.78365e-58	3.17782e-51	ABI1;CDC42;CREB1;CRK;CTNND1;FOXO1;GJA1;KRAS;MAP2K1;MAP3K2;MAPK1;MAPK14;NCK2;PKN2;PTPN11;PTPN12;RASA1;SHOC2;SOS1;SP1
342	EGFR1	ceRNA	CELF1	134	77	13	1.40741	1.15521	10.0351	1.06851e-23	1.21981e-16	ABI1;ASAP1;CBLB;CDC42;EPS15;KRAS;MAP3K2;MAP3K3;PKN2;PRKAR1A;RASA1;SMAD2;SOS1
343	EGFR1	ceRNA	CELF2	134	77	18	1.40741	1.15521	14.3633	8.79381e-47	1.0039e-39	ABI1;CDC42;CREB1;EPS15;FOXO1;KLF11;MAP3K2;MAP3K3;NCK1;PKN2;PRKAR1A;PRKCB;PTPN12;RPS6KA3;SH3KBP1;SOS1;SP1;SPRY2
344	EGFR1	ceRNA	CHD9	134	77	21	1.40741	1.15521	16.9603	1.61518e-64	1.84389e-57	ABI1;ASAP1;ATF1;CDC42;CREB1;EPS15;FOXO1;KLF11;KRAS;MAP3K2;MAP3K3;MAPK1;NCK1;PKN2;PRKAR1A;PTPN12;RAB5A;SHOC2;SMAD2;SOS1;WASL
345	EGFR1	ceRNA	CNOT6	134	77	14	1.40741	1.15521	10.9007	1.14374e-27	1.3057e-20	ABI1;ASAP1;CREB1;CRK;EPS15;KLF11;KRAS;MAP3K2;PIK3CA;PKN2;RASA1;SHOC2;SMAD2;WASL
346	EGFR1	ceRNA	CNOT6L	134	77	16	1.40741	1.15521	12.632	1.40657e-36	1.60574e-29	ABI1;ASAP1;CDC42;CREB1;EPS15;FOXO1;MAP2K1;MAPK1;NRAS;PKN2;PRKAR1A;RASA1;RPS6KA3;SHOC2;SOS1;WASL
347	EGFR1	ceRNA	CPEB2	134	77	11	1.40741	1.15521	8.3038	1.00833e-16	1.15111e-09	ABI1;EPS15;FOXO1;KRAS;MAP3K2;MAP3K4;RASA1;SHOC2;SOS1;VAV3;WASL
348	EGFR1	ceRNA	CPEB3	134	77	16	1.40741	1.15521	12.632	1.40657e-36	1.60574e-29	ABI1;ASAP1;ATF1;CDC42;CREB1;CRK;GJA1;PKN2;PTPN12;RAB5A;RASA1;SHOC2;SOS1;SP1;VAV3;WASL
349	EGFR1	ceRNA	CPEB4	134	77	16	1.40741	1.15521	12.632	1.40657e-36	1.60574e-29	ABI1;ASAP1;ATF1;CREB1;EPS15;GJA1;MAP3K2;MAPK1;PIK3CA;PKN2;RAB5A;SOS1;SP1;VAV3;WASL;YWHAB
350	EGFR1	ceRNA	CPSF6	134	77	10	1.40741	1.15521	7.43815	1.02105e-13	1.16563e-06	ABI1;ATF1;CREB1;KRAS;MAP3K2;PTPN12;RAB5A;SHOC2;SOS1;WASL
351	EGFR1	ceRNA	CREB1	134	77	14	1.40741	1.15521	10.9007	1.14374e-27	1.3057e-20	ABI1;ASAP1;CBLB;JAK1;KLF11;KRAS;MAP3K2;MAPK1;PKN2;RALBP1;RPS6KA3;SHOC2;SOS1;SP1
352	EGFR1	ceRNA	CREBRF	134	77	16	1.40741	1.15521	12.632	1.40657e-36	1.60574e-29	ABI1;CDC42;CREB1;FOXO1;JAK2;KRAS;MAP3K2;MAPK1;PKN2;PRKAR1A;PTPN12;RAF1;SHOC2;SOS1;SP1;SPRY2
353	EGFR1	ceRNA	CTDSPL2	134	77	14	1.40741	1.15521	10.9007	1.14374e-27	1.3057e-20	ABI1;CDC42;CRKL;FOXO1;KRAS;PKN2;PRKAR1A;PRKCA;PRKD1;PTPN12;RAB5A;SHOC2;SMAD2;SP1
354	EGFR1	ceRNA	DCP1A	134	77	9	1.40741	1.15521	6.5725	4.94774e-11	0.000564836	ASAP1;ATF1;CDC42;FOXO1;NCK1;PTPN12;RASA1;SOS1;SP1
355	EGFR1	ceRNA	DDX3X	134	77	16	1.40741	1.15521	12.632	1.40657e-36	1.60574e-29	ABI1;CDC42;EPS15;FOXO1;MAP3K3;MAPK1;PIK3CA;PITPNA;PKN2;PTPN12;RAB5A;RASA1;SHOC2;SOS1;SP1;WASL
356	EGFR1	ceRNA	DOCK4	134	77	14	1.40741	1.15521	10.9007	1.14374e-27	1.3057e-20	ABI1;ATF1;CBLB;CREB1;EPS15;FOXO1;KLF11;MAP3K2;PKN2;PRKAR1A;PTPN12;SOS1;SPRY2;WASL
357	EGFR1	ceRNA	DYRK1A	134	77	11	1.40741	1.15521	8.3038	1.00833e-16	1.15111e-09	ABI1;ATF1;CDC42;CREB1;NRAS;PKN2;PTPN12;SHOC2;SOS1;SP1;WASL
358	EGFR1	ceRNA	DYRK2	134	77	18	1.40741	1.15521	14.3633	8.79381e-47	1.0039e-39	ABI1;ASAP1;CREB1;CTNND1;EPS15;JAK1;KRAS;MAP3K3;MAPK1;NRAS;PITPNA;PKN2;PRKAR1A;RALB;RPS6KA3;SOS1;SP1;WASL
359	EGFR1	ceRNA	EEA1	134	77	11	1.40741	1.15521	8.3038	1.00833e-16	1.15111e-09	ABI1;ASAP1;CREB1;KRAS;MAP3K3;NRAS;PKN2;PRKAR1A;RALB;SHOC2;WASL
360	EGFR1	ceRNA	EIF2C1	134	77	12	1.40741	1.15521	9.16944	4.75483e-20	5.42813e-13	ASAP1;JAK1;KLF11;KRAS;MAP3K2;MAPK1;NRAS;PIK3CA;PKN2;RPS6KA3;SOS1;SP1
361	EGFR1	ceRNA	EIF2C4	134	77	10	1.40741	1.15521	7.43815	1.02105e-13	1.16563e-06	ASAP1;EPS15;MAP2K1;MAP3K4;PTPN12;RALBP1;RASA1;RPS6KA3;SOS1;WASL
362	EGFR1	ceRNA	ELK3	134	77	18	1.40741	1.15521	14.3633	8.79381e-47	1.0039e-39	ABI1;ASAP1;CAV1;CREB1;EPS15;GJA1;JAK1;KLF11;KRAS;MAP3K14;MAP3K3;MAPK1;PRKCA;PTPN12;SHOC2;SOS1;SP1;SPRY2
363	EGFR1	ceRNA	EPC2	134	77	10	1.40741	1.15521	7.43815	1.02105e-13	1.16563e-06	CREB1;EPS15;ERRFI1;MAP3K2;MAP3K4;MAPK1;RAB5A;RASA1;SOS1;WASL
364	EGFR1	ceRNA	FAM126B	134	77	9	1.40741	1.15521	6.5725	4.94774e-11	0.000564836	ABI1;CDC42;CREB1;EPS8;GAB1;KRAS;PKN2;SHOC2;SP1
365	EGFR1	ceRNA	FAM179B	134	77	15	1.40741	1.15521	11.7664	5.81536e-32	6.63883e-25	ABI1;ASAP1;ATF1;CDC42;CREB1;EPS8;KRAS;MAP3K4;MAPK1;PKN2;RAF1;RASA1;SHOC2;SOS1;WASL
366	EGFR1	ceRNA	FMR1	134	77	18	1.40741	1.15521	14.3633	8.79381e-47	1.0039e-39	CREB1;EPS15;EPS8;KRAS;MAP3K2;MAPK1;PIK3CA;PRKAR1A;PTPN11;PTPN12;RAB5A;RALBP1;RASA1;SHOC2;SOS1;SP1;STAT5B;WASL
367	EGFR1	ceRNA	FNDC3B	134	77	18	1.40741	1.15521	14.3633	8.79381e-47	1.0039e-39	ARF4;ASAP1;ATF1;CBLB;CREB1;FOXO1;KLF11;KRAS;MAP3K2;NCK2;PKN2;PRKAR1A;PTPN12;RPS6KA3;SH3KBP1;SOS1;SP1;STAT3
368	EGFR1	ceRNA	FOXJ3	134	77	11	1.40741	1.15521	8.3038	1.00833e-16	1.15111e-09	ABI1;CREB1;CRK;KRAS;MAP3K2;MAPK1;PIK3R3;PKN2;RAB5A;SHOC2;SOS1
369	EGFR1	ceRNA	FOXP1	134	77	9	1.40741	1.15521	6.5725	4.94774e-11	0.000564836	ABI1;CREB1;KRAS;NCK2;PIK3CA;PKN2;RASA1;SHOC2;SP1
370	EGFR1	ceRNA	FRMD6	134	77	10	1.40741	1.15521	7.43815	1.02105e-13	1.16563e-06	ABI1;ASAP1;ATF1;CREB1;GJA1;KRAS;MAPK1;NCK2;PRKAR1A;PTPN12
371	EGFR1	ceRNA	FRS2	134	77	17	1.40741	1.15521	13.4977	1.61335e-41	1.84181e-34	ASAP1;CDC42;CREB1;CRK;CRKL;KRAS;MAP3K2;PKN2;PRKAR1A;RASA1;RBBP7;SHOC2;SOS1;SP1;STAT3;VAV3;WASL
372	EGFR1	ceRNA	FUBP3	134	77	14	1.40741	1.15521	10.9007	1.14374e-27	1.3057e-20	ATF1;CDC42;CREB1;CRKL;EPS8;GAB1;KRAS;MAP3K2;MAPK1;PRKAR1A;RAB5A;SMAD2;SOS1;SP1
373	EGFR1	ceRNA	G3BP2	134	77	9	1.40741	1.15521	6.5725	4.94774e-11	0.000564836	ABI1;ASAP1;CREB1;KRAS;MAP3K2;MAPK1;RAB5A;RASA1;SOS1
374	EGFR1	ceRNA	GMFB	134	77	13	1.40741	1.15521	10.0351	1.06851e-23	1.21981e-16	ABI1;ASAP1;CREB1;CRK;EPS15;KRAS;MAPK1;PIK3CA;PKN2;PRKAR1A;RASA1;SOS1;SP1
375	EGFR1	ceRNA	GSK3B	134	77	11	1.40741	1.15521	8.3038	1.00833e-16	1.15111e-09	ABI1;CREB1;EPS15;GAB1;HAT1;MAP3K4;NCK1;PKN2;RAB5A;SOS1;SP1
376	EGFR1	ceRNA	HBP1	134	77	9	1.40741	1.15521	6.5725	4.94774e-11	0.000564836	ABI1;CREB1;JAK1;MAP2K1;MAP3K2;PIK3CA;PKN2;RASA1;SP1
377	EGFR1	ceRNA	HECTD2	134	77	9	1.40741	1.15521	6.5725	4.94774e-11	0.000564836	ASAP1;CREB1;MAP3K2;PKN2;PTPN12;SHOC2;SMAD2;SP1;WASL
378	EGFR1	ceRNA	HIAT1	134	77	16	1.40741	1.15521	12.632	1.40657e-36	1.60574e-29	ABI1;ATF1;CREB1;CRK;EPS15;JAK1;JAK2;KRAS;MAPK1;NCK1;PKN2;PRKAR1A;PTPN12;RAB5A;RASA1;SOS1
379	EGFR1	ceRNA	HIVEP2	134	77	10	1.40741	1.15521	7.43815	1.02105e-13	1.16563e-06	ABI1;CREB1;CRK;EPS15;FOXO1;MAP3K2;MAPK1;PRKCA;PTPN12;SOS1
380	EGFR1	ceRNA	KIAA0240	134	77	9	1.40741	1.15521	6.5725	4.94774e-11	0.000564836	CDC42;CREB1;CRK;FOXO1;MAP3K2;PIK3CA;PKN2;SOS1;SP1
381	EGFR1	ceRNA	KLF12	134	77	10	1.40741	1.15521	7.43815	1.02105e-13	1.16563e-06	ASAP1;CREB1;EPS8;JAK1;KLF11;KRAS;MAP3K2;PRKAR1A;SOS1;SP1
382	EGFR1	ceRNA	KLF6	134	77	10	1.40741	1.15521	7.43815	1.02105e-13	1.16563e-06	CREB1;EPS8;FOS;FOXO1;GJA1;KRAS;MAP3K3;SH3KBP1;SP1;SPRY2
383	EGFR1	ceRNA	KLHL15	134	77	12	1.40741	1.15521	9.16944	4.75483e-20	5.42813e-13	ABI1;CREB1;CRK;EPS15;KLF11;KRAS;MAP3K2;MAPK1;PIK3CA;PKN2;RASA1;SOS1
384	EGFR1	ceRNA	KPNA3	134	77	15	1.40741	1.15521	11.7664	5.81536e-32	6.63883e-25	ABI1;CREB1;CTNND1;FOXO1;KRAS;MAP3K2;MAPK1;PKN2;PTPN11;PTPN12;RASA1;SH3KBP1;SHOC2;SOS1;SP1
385	EGFR1	ceRNA	LARP4	134	77	9	1.40741	1.15521	6.5725	4.94774e-11	0.000564836	ATF1;CDC42;KRAS;MAP3K2;PKN2;RAB5A;SHOC2;SOS1;WASL
386	EGFR1	ceRNA	LCOR	134	77	26	1.40741	1.15521	21.2885	1.45098e-100	1.65644e-93	ABI1;ASAP1;CDC42;CREB1;CRKL;EPS15;EPS8;FOXO1;KRAS;MAP3K2;MAPK1;NRAS;PIK3C2B;PKN2;PRKAR1A;PTPN12;RAB5A;RASA1;RPS6KA3;SHOC2;SMAD2;SOS1;SP1;VAV3;WASL;YWHAB
387	EGFR1	ceRNA	LCORL	134	77	20	1.40741	1.15521	16.0946	2.78365e-58	3.17782e-51	ABI1;ASAP1;ATF1;CDC42;CREB1;CRK;EPS15;KRAS;MAP3K2;MAPK1;PKN2;PTPN12;RAB5A;RALBP1;RASA1;SHOC2;SMAD2;SOS1;SP1;WASL
388	EGFR1	ceRNA	LRCH1	134	77	13	1.40741	1.15521	10.0351	1.06851e-23	1.21981e-16	ABI1;CREB1;CRK;EPS15;JAK1;KLF11;MAP3K14;MAP3K2;MAPK1;NRAS;RALBP1;RASA1;SP1
389	EGFR1	ceRNA	LRP6	134	77	10	1.40741	1.15521	7.43815	1.02105e-13	1.16563e-06	ASAP1;CREB1;EPS15;FOXO1;KRAS;MAP3K4;RASA1;SOS1;SP1;WASL
390	EGFR1	ceRNA	LYSMD3	134	77	10	1.40741	1.15521	7.43815	1.02105e-13	1.16563e-06	ASAP1;CREB1;KRAS;MAPK1;PIK3CA;PKN2;PTPN12;RBBP7;SOS1;SP1
391	EGFR1	ceRNA	MAGI1	134	77	9	1.40741	1.15521	6.5725	4.94774e-11	0.000564836	ABI1;CREB1;EPS15;JAK1;JAK2;KRAS;PKN2;RALBP1;SOS1
392	EGFR1	ceRNA	MAML1	134	77	10	1.40741	1.15521	7.43815	1.02105e-13	1.16563e-06	ASAP1;CREB1;EPS15;KRAS;MAPK1;PTPN12;RASA1;SOS1;STAT3;WASL
393	EGFR1	ceRNA	MAP3K1	134	77	15	1.40741	1.15521	11.7664	5.81536e-32	6.63883e-25	ABI1;ATF1;CREB1;CRK;EPS15;MAP3K2;PKN2;PRKAR1A;PTPN12;RAB5A;RASA1;SH3KBP1;SHOC2;SOS1;VAV3
394	EGFR1	ceRNA	MAPRE1	134	77	9	1.40741	1.15521	6.5725	4.94774e-11	0.000564836	ABI1;CDC42;CREB1;CTNND1;EPS15;KRAS;RASA1;SOS1;SP1
395	EGFR1	ceRNA	MAST4	134	77	9	1.40741	1.15521	6.5725	4.94774e-11	0.000564836	ABI1;CREB1;MAP3K4;PRKAR1A;RASA1;SHOC2;SOS1;SP1;SPRY2
396	EGFR1	ceRNA	MBNL1	134	77	16	1.40741	1.15521	12.632	1.40657e-36	1.60574e-29	ABI1;ASAP1;ATF1;CBLB;CREB1;EPS15;FOXO1;GJA1;MAP3K14;MAP3K2;MAP3K4;PKN2;RASA1;RPS6KA3;SH3KBP1;SHOC2
397	EGFR1	ceRNA	MIER3	134	77	19	1.40741	1.15521	15.229	2.27038e-52	2.59187e-45	ABI1;ASAP1;ATF1;CREB1;EPS15;GAB1;KRAS;MAP3K2;MAPK1;PIK3CA;PKN2;PTPN12;RALBP1;RASA1;SHOC2;SMAD2;SOS1;SP1;STAT3
398	EGFR1	ceRNA	MITF	134	77	9	1.40741	1.15521	6.5725	4.94774e-11	0.000564836	CREB1;CRK;FOXO1;GJA1;KRAS;MAPK1;PKN2;RAC1;SOS1
399	EGFR1	ceRNA	MKL2	134	77	10	1.40741	1.15521	7.43815	1.02105e-13	1.16563e-06	ATF1;CREB1;KRAS;MAP3K14;MAP3K2;PKN2;PRKAR1A;RASA1;SOS1;VAV3
400	EGFR1	ceRNA	MLL3	134	77	11	1.40741	1.15521	8.3038	1.00833e-16	1.15111e-09	CREB1;EPS15;KRAS;PKN2;PRKAR1A;PTPN12;RAB5A;RASA1;SMAD2;SOS1;WASL
401	EGFR1	ceRNA	MLL5	134	77	9	1.40741	1.15521	6.5725	4.94774e-11	0.000564836	ABI1;CREB1;CRK;EPS8;KRAS;MAPK1;PKN2;RASA1;SP1
402	EGFR1	ceRNA	MTF1	134	77	17	1.40741	1.15521	13.4977	1.61335e-41	1.84181e-34	ABI1;ASAP1;CREB1;CRK;EPS15;JAK1;KLF11;MAP2K1;MAP3K2;MAPK1;PIK3CA;PKN2;PTPN12;RASA1;SOS1;SP1;STAT3
403	EGFR1	ceRNA	MTF2	134	77	10	1.40741	1.15521	7.43815	1.02105e-13	1.16563e-06	ABI1;CREB1;EPS15;KRAS;MAP3K2;PIK3CA;PKN2;PTPN12;SOS1;WASL
404	EGFR1	ceRNA	NAA15	134	77	14	1.40741	1.15521	10.9007	1.14374e-27	1.3057e-20	ASAP1;EPS15;FOXO1;MAP3K3;NCK1;NRAS;PKN2;RAB5A;RALBP1;RASA1;SOS1;SP1;WASL;YWHAB
405	EGFR1	ceRNA	NAV3	134	77	10	1.40741	1.15521	7.43815	1.02105e-13	1.16563e-06	CDC42;CREB1;FOXO1;GJA1;MAP3K4;PKN2;RASA1;SOCS3;SOS1;SP1
406	EGFR1	ceRNA	NBEA	134	77	11	1.40741	1.15521	8.3038	1.00833e-16	1.15111e-09	ABI1;CREB1;EPS15;KRAS;MAP3K14;MAPK1;RASA1;SHOC2;SOS1;SP1;WASL
407	EGFR1	ceRNA	NCKAP1	134	77	9	1.40741	1.15521	6.5725	4.94774e-11	0.000564836	ABI1;EPS15;KRAS;PKN2;PTPN12;RAB5A;RASA1;SOS1;WASL
408	EGFR1	ceRNA	NCOA3	134	77	14	1.40741	1.15521	10.9007	1.14374e-27	1.3057e-20	ABI1;ASAP1;CDC42;CREB1;CRK;JAK1;KRAS;MAP3K2;NRAS;PKN2;PRKAR1A;RASA1;SHOC2;SP1
409	EGFR1	ceRNA	NEDD4	134	77	10	1.40741	1.15521	7.43815	1.02105e-13	1.16563e-06	ATF1;CREB1;CRK;KRAS;MAP3K14;MAP3K2;PKN2;SHOC2;SOS1;VAV3
410	EGFR1	ceRNA	NFIB	134	77	14	1.40741	1.15521	10.9007	1.14374e-27	1.3057e-20	ASAP1;CREB1;EPS15;EPS8;FOXO1;GJA1;MAP3K14;PIK3CA;PKN2;RBBP7;RPS6KA3;SH3KBP1;SOS1;SPRY2
411	EGFR1	ceRNA	NOVA1	134	77	9	1.40741	1.15521	6.5725	4.94774e-11	0.000564836	ASAP1;CDC42;FOS;FOXO1;NCK2;PRKCB;SH3KBP1;SPRY2;VAV3
412	EGFR1	ceRNA	NPAT	134	77	11	1.40741	1.15521	8.3038	1.00833e-16	1.15111e-09	ABI1;ASAP1;CREB1;JAK1;MAP3K14;MAP3K2;MAPK1;NCK1;PTPN12;RASA1;SHOC2
413	EGFR1	ceRNA	NR3C1	134	77	10	1.40741	1.15521	7.43815	1.02105e-13	1.16563e-06	ASAP1;CDC42;CRKL;EPS8;FOXO1;MAP3K4;PKN2;PRKAR1A;SH3KBP1;SOS1
414	EGFR1	ceRNA	NRP2	134	77	11	1.40741	1.15521	8.3038	1.00833e-16	1.15111e-09	ABI1;CREB1;CRK;GJA1;KLF11;MAP3K2;MAP3K3;NCK2;PRKAR1A;PRKD1;SOS1
415	EGFR1	ceRNA	NUFIP2	134	77	19	1.40741	1.15521	15.229	2.27038e-52	2.59187e-45	ABI1;ASAP1;CDC42;CREB1;CTNND1;EPS15;FOXO1;GAB1;KRAS;MAP3K2;MAP3K4;MAPK1;PKN2;PRKAR1A;RAF1;RASA1;SHOC2;SOS1;SP1
416	EGFR1	ceRNA	OTUD4	134	77	22	1.40741	1.15521	17.8259	4.44873e-71	5.07868e-64	ABI1;ASAP1;CDC42;CREB1;CRKL;EPS15;FOXO1;JAK1;KRAS;MAP3K2;MAPK1;NRAS;PITPNA;PKN2;PRKAR1A;PTPN12;SHOC2;SMAD2;SOS1;SP1;STAT3;WASL
417	EGFR1	ceRNA	PAFAH1B1	134	77	12	1.40741	1.15521	9.16944	4.75483e-20	5.42813e-13	ABI1;CDC42;CREB1;EPS15;FOXO1;MAPK1;PRKAR1A;RAB5A;RBBP7;SHOC2;SOS1;WASL
418	EGFR1	ceRNA	PAN3	134	77	11	1.40741	1.15521	8.3038	1.00833e-16	1.15111e-09	CREB1;EPS15;JAK2;KRAS;MAPK1;PIK3CA;PKN2;PTPN12;RAB5A;RASA1;SP1
419	EGFR1	ceRNA	PAPD4	134	77	9	1.40741	1.15521	6.5725	4.94774e-11	0.000564836	ATF1;CREB1;MAP3K4;NCK1;RAB5A;RASA1;SOS1;SP1;WASL
420	EGFR1	ceRNA	PCNP	134	77	9	1.40741	1.15521	6.5725	4.94774e-11	0.000564836	ABI1;CREB1;EPS15;KRAS;MAP3K2;MAPK1;PTPN12;SHOC2;SOS1
421	EGFR1	ceRNA	PDIK1L	134	77	10	1.40741	1.15521	7.43815	1.02105e-13	1.16563e-06	ABI1;CDC42;EPS15;KRAS;MAPK1;NRAS;PIK3CA;SOS1;SP1;WASL
422	EGFR1	ceRNA	PDS5B	134	77	10	1.40741	1.15521	7.43815	1.02105e-13	1.16563e-06	ABI1;CDC42;EPS8;HAT1;NCK1;NRAS;PTPN11;RAB5A;SOS1;WASL
423	EGFR1	ceRNA	PIK3C2A	134	77	12	1.40741	1.15521	9.16944	4.75483e-20	5.42813e-13	CDC42;CREB1;EPS15;KRAS;MAP3K4;MAPK1;PTPN12;RAB5A;RASA1;SOS1;SP1;WASL
424	EGFR1	ceRNA	PKN2	134	77	9	1.40741	1.15521	6.5725	4.94774e-11	0.000564836	ABI1;ASAP1;CREB1;CRK;JAK1;KRAS;NRAS;SHOC2;WASL
425	EGFR1	ceRNA	PPM1B	134	77	16	1.40741	1.15521	12.632	1.40657e-36	1.60574e-29	ABI1;ATF1;CBLB;CDC42;CREB1;FOXO1;KRAS;MAP3K2;PKN2;PRKAR1A;PTPN12;RAB5A;RASA1;SHOC2;SP1;YWHAB
426	EGFR1	ceRNA	PPP1R12A	134	77	12	1.40741	1.15521	9.16944	4.75483e-20	5.42813e-13	ATF1;CBLB;CRK;FOXO1;KRAS;MAPK1;NCK1;PRKAR1A;RAB5A;RASA1;SPRY2;WASL
427	EGFR1	ceRNA	PPP3R1	134	77	11	1.40741	1.15521	8.3038	1.00833e-16	1.15111e-09	ABI1;ATF1;CRK;JAK1;KRAS;MAP3K2;MAPK1;PKN2;PTPN12;RASA1;SOS1
428	EGFR1	ceRNA	PPP6C	134	77	10	1.40741	1.15521	7.43815	1.02105e-13	1.16563e-06	CDC42;CREB1;MAP3K2;NRAS;PKN2;PRKAR1A;RBBP7;SHOC2;SOS1;WASL
429	EGFR1	ceRNA	PTEN	134	77	17	1.40741	1.15521	13.4977	1.61335e-41	1.84181e-34	ABI1;ASAP1;CDC42;CREB1;CRK;EPS15;JAK1;KRAS;MAP3K14;MAPK1;PIK3R3;PRKAR1A;RAB5A;RASA1;RPS6KA3;SHOC2;SOS1
430	EGFR1	ceRNA	QKI	134	77	10	1.40741	1.15521	7.43815	1.02105e-13	1.16563e-06	CDC42;CREB1;EPS15;ERRFI1;GJA1;KRAS;MAP3K4;MAPK1;SOS1;SP1
431	EGFR1	ceRNA	RAPGEF2	134	77	9	1.40741	1.15521	6.5725	4.94774e-11	0.000564836	CREB1;KLF11;KRAS;MAP3K14;MAPK1;PKN2;PRKAR1A;SHOC2;SOS1
432	EGFR1	ceRNA	RB1CC1	134	77	10	1.40741	1.15521	7.43815	1.02105e-13	1.16563e-06	CREB1;EPS15;MAPK1;PKN2;PTPN12;RALBP1;SHOC2;SOS1;STAT3;WASL
433	EGFR1	ceRNA	RBM12	134	77	9	1.40741	1.15521	6.5725	4.94774e-11	0.000564836	CREB1;CRK;CRKL;FOXO1;KRAS;MAPK1;PRKAR1A;RASA1;SOS1
434	EGFR1	ceRNA	REV3L	134	77	12	1.40741	1.15521	9.16944	4.75483e-20	5.42813e-13	CREB1;KLF11;KRAS;MAP3K2;MAP3K4;NRAS;PKN2;PRKAR1A;PTPN12;SHOC2;SOS1;SP1
435	EGFR1	ceRNA	RFX7	134	77	11	1.40741	1.15521	8.3038	1.00833e-16	1.15111e-09	CDC42;CREB1;EPS15;MAP3K4;PRKAR1A;PTPN12;RAB5A;RASA1;SHOC2;SOS1;SP1
436	EGFR1	ceRNA	RICTOR	134	77	9	1.40741	1.15521	6.5725	4.94774e-11	0.000564836	ASAP1;CDC42;FOXO1;MAP3K3;MAP3K4;NCK1;NRAS;PKN2;SP1
437	EGFR1	ceRNA	RLIM	134	77	15	1.40741	1.15521	11.7664	5.81536e-32	6.63883e-25	ABI1;CBLB;CDC42;CREB1;CTNND1;EPS15;GAB1;KRAS;MAPK1;PKN2;RASA1;SMAD2;SOS1;SP1;STAT3
438	EGFR1	ceRNA	RNF38	134	77	10	1.40741	1.15521	7.43815	1.02105e-13	1.16563e-06	ASAP1;CDC42;CRK;FOXO1;KRAS;MAP3K4;PKN2;RASA1;SP1;WASL
439	EGFR1	ceRNA	ROCK2	134	77	12	1.40741	1.15521	9.16944	4.75483e-20	5.42813e-13	ABI1;ASAP1;CREB1;CRK;KRAS;MAP3K3;MAPK1;PIK3CA;PKN2;PTPN12;RALBP1;SP1
440	EGFR1	ceRNA	RORA	134	77	10	1.40741	1.15521	7.43815	1.02105e-13	1.16563e-06	ABI1;ASAP1;ATF1;CREB1;JAK1;MAP3K2;MAP3K3;PKN2;SHOC2;SOS1
441	EGFR1	ceRNA	RPS6KB1	134	77	11	1.40741	1.15521	8.3038	1.00833e-16	1.15111e-09	ASAP1;ATF1;CREB1;EPS15;KRAS;PKN2;PTPN12;RAB5A;SHOC2;SOS1;SP1
442	EGFR1	ceRNA	RSBN1	134	77	9	1.40741	1.15521	6.5725	4.94774e-11	0.000564836	CDC42;EPS15;MAP3K2;MAPK1;PTPN12;SHOC2;SOS1;SP1;WASL
443	EGFR1	ceRNA	RYBP	134	77	10	1.40741	1.15521	7.43815	1.02105e-13	1.16563e-06	ABI1;CDC42;CREB1;CRK;GAB1;PKN2;PRKAR1A;RAF1;SP1;YWHAB
444	EGFR1	ceRNA	SEPT7	134	77	9	1.40741	1.15521	6.5725	4.94774e-11	0.000564836	ABI1;CREB1;JAK1;KLF11;KRAS;PRKAR1A;PTPN12;RASA1;SH3KBP1
445	EGFR1	ceRNA	SMAD1	134	77	9	1.40741	1.15521	6.5725	4.94774e-11	0.000564836	ABI1;ATF1;CREB1;MAP3K2;PKN2;PRKAR1A;PTPN12;RASA1;SOS1
446	EGFR1	ceRNA	SNRK	134	77	9	1.40741	1.15521	6.5725	4.94774e-11	0.000564836	ABI1;ASAP1;CDC42;FOXO1;JAK1;KLF11;PKN2;RPS6KA3;SOS1
447	EGFR1	ceRNA	SNX13	134	77	10	1.40741	1.15521	7.43815	1.02105e-13	1.16563e-06	ABI1;CDC42;EPS15;EPS8;MAPK1;PKN2;RASA1;SOS1;SP1;WASL
448	EGFR1	ceRNA	SP4	134	77	12	1.40741	1.15521	9.16944	4.75483e-20	5.42813e-13	ABI1;CREB1;FOXO1;KLF11;KRAS;MAP3K2;MAP3K3;MAPK1;PKN2;PRKAR1A;PTPN12;SHOC2
449	EGFR1	ceRNA	SYNCRIP	134	77	20	1.40741	1.15521	16.0946	2.78365e-58	3.17782e-51	ABI1;CREB1;EPS15;GJA1;KLF11;KRAS;MAP3K4;MAPK1;NCK2;NRAS;PKN2;PRKAR1A;PTPN12;RAB5A;RALBP1;RASA1;SHOC2;SOS1;SP1;WASL
450	EGFR1	ceRNA	TAB3	134	77	10	1.40741	1.15521	7.43815	1.02105e-13	1.16563e-06	ABI1;CBLB;CDC42;CREB1;EPS15;FOXO1;KRAS;PKN2;SHOC2;SOS1
451	EGFR1	ceRNA	TBC1D15	134	77	11	1.40741	1.15521	8.3038	1.00833e-16	1.15111e-09	ABI1;ATF1;CREB1;JAK1;KLF11;KRAS;MAP3K2;MAPK1;PKN2;PRKAR1A;SHOC2
452	EGFR1	ceRNA	TBC1D9	134	77	9	1.40741	1.15521	6.5725	4.94774e-11	0.000564836	ABI1;ASAP1;CRK;KRAS;MAP2K1;MAP3K14;PKN2;RBBP7;SHOC2
453	EGFR1	ceRNA	TCF4	134	77	32	1.40741	1.15521	26.4824	1.54598e-154	1.7649e-147	ABI1;ASAP1;ATF1;CAV1;CAV2;CDC42;CREB1;EPS15;EPS8;FOS;FOXO1;GJA1;HAT1;JAK1;JAK2;KLF11;KRAS;MAP3K4;MAPK1;PKN2;PRKCA;PRKCB;PRKD1;PTPN12;PTPRR;RASA1;SH3KBP1;SHOC2;SOS1;SP1;SPRY2;WASL
454	EGFR1	ceRNA	TET2	134	77	9	1.40741	1.15521	6.5725	4.94774e-11	0.000564836	ABI1;ASAP1;CREB1;EPS15;MAP3K2;PKN2;PTPN12;SOS1;SP1
455	EGFR1	ceRNA	TET3	134	77	11	1.40741	1.15521	8.3038	1.00833e-16	1.15111e-09	ABI1;ASAP1;CREB1;CRKL;JAK1;KRAS;MAP3K2;MAPK14;PIK3R3;PKN2;SP1
456	EGFR1	ceRNA	TGFBR2	134	77	10	1.40741	1.15521	7.43815	1.02105e-13	1.16563e-06	ASAP1;CREB1;KLF11;MAP3K14;MAP3K2;MAP3K3;MAPK1;PIK3CA;RPS6KA3;SH3KBP1
457	EGFR1	ceRNA	TNPO1	134	77	17	1.40741	1.15521	13.4977	1.61335e-41	1.84181e-34	ABI1;ASAP1;CBLB;CDC42;CREB1;EPS15;FOXO1;KRAS;MAP3K3;MAP3K4;MAPK1;RAB5A;RASA1;SHOC2;SOS1;SP1;WASL
458	EGFR1	ceRNA	TOX	134	77	9	1.40741	1.15521	6.5725	4.94774e-11	0.000564836	ARF4;ASAP1;CREB1;EPS15;FOXO1;PKN2;PRKCB;SH3KBP1;SOS1
459	EGFR1	ceRNA	UBE2W	134	77	11	1.40741	1.15521	8.3038	1.00833e-16	1.15111e-09	CREB1;EPS15;EPS8;MAP3K2;NRAS;PKN2;PTPN12;RAB5A;SOS1;SP1;WASL
460	EGFR1	ceRNA	WDFY3	134	77	10	1.40741	1.15521	7.43815	1.02105e-13	1.16563e-06	ABI1;CDC42;CREB1;EPS15;KRAS;MAP3K4;MAPK1;PKN2;PTPN12;SP1
461	EGFR1	ceRNA	WDR47	134	77	10	1.40741	1.15521	7.43815	1.02105e-13	1.16563e-06	ASAP1;CREB1;CRKL;KRAS;PKN2;PTPN12;RASA1;SOS1;SP1;WASL
462	EGFR1	ceRNA	WNK3	134	77	9	1.40741	1.15521	6.5725	4.94774e-11	0.000564836	ABI1;ASAP1;CREB1;KLF11;KRAS;NCK2;RASA1;RPS6KA3;SOS1
463	EGFR1	ceRNA	YTHDF3	134	77	18	1.40741	1.15521	14.3633	8.79381e-47	1.0039e-39	ABI1;ASAP1;CDC42;CREB1;CRK;EPS15;EPS8;GAB1;KRAS;MAPK1;NRAS;PKN2;PTPN12;RASA1;SMAD2;SOS1;SP1;WASL
464	EGFR1	ceRNA	ZDHHC17	134	77	9	1.40741	1.15521	6.5725	4.94774e-11	0.000564836	CREB1;EPS15;MAP3K2;PTPN12;SHOC2;SMAD2;SOS1;SP1;WASL
465	EGFR1	ceRNA	ZEB1	134	77	11	1.40741	1.15521	8.3038	1.00833e-16	1.15111e-09	ABI1;CREB1;EPS15;FOS;FOXO1;GJA1;KRAS;MAPK1;PKN2;PRKCA;SP1
466	EGFR1	ceRNA	ZEB2	134	77	21	1.40741	1.15521	16.9603	1.61518e-64	1.84389e-57	ABI1;CAV1;CDC42;CREB1;EPS15;FOXO1;GJA1;KRAS;MAP3K2;MAP3K4;MAPK1;PRKAR1A;PRKCA;PRKCB;PRKD1;PTPN12;RASA1;SH3KBP1;SHOC2;SP1;SPRY2
467	EGFR1	ceRNA	ZFHX3	134	77	9	1.40741	1.15521	6.5725	4.94774e-11	0.000564836	CDC42;CREB1;KRAS;MAPK1;PRKD1;RASA1;SHOC2;SOS1;SP1
468	EGFR1	ceRNA	ZFHX4	134	77	19	1.40741	1.15521	15.229	2.27038e-52	2.59187e-45	ABI1;CDC42;CREB1;CRK;EPS8;FOS;FOXO1;KRAS;MAP3K2;MAPK1;PIK3CA;PKN2;PRKD1;PTPN12;RAB5A;RASA1;RPS6KA3;SH3KBP1;SPRY2
469	EGFR1	ceRNA	ZFPM2	134	77	14	1.40741	1.15521	10.9007	1.14374e-27	1.3057e-20	ABI1;ASAP1;CREB1;EPS8;GJA1;NRAS;PRKCA;PRKD1;SHOC2;SOCS3;SOS1;SP1;SPRY2;WASL
470	EGFR1	ceRNA	ZNF148	134	77	18	1.40741	1.15521	14.3633	8.79381e-47	1.0039e-39	ASAP1;CDC42;CREB1;EPS15;KRAS;MAP3K2;MAPK1;NCK1;PKN2;PRKAR1A;PTPN12;RAB5A;RASA1;SHOC2;SOS1;SP1;STAT3;WASL
471	EGFR1	ceRNA	ZNF217	134	77	9	1.40741	1.15521	6.5725	4.94774e-11	0.000564836	ABI1;CREB1;EPS15;GAB1;KRAS;MAP3K4;PTPN12;RAB5A;SP1
472	EGFR1	ceRNA	ZNF367	134	77	10	1.40741	1.15521	7.43815	1.02105e-13	1.16563e-06	CREB1;CRK;FOXO1;KRAS;MAP3K14;PKN2;PTPN12;RBBP7;SMAD2;STAT3
473	EGFR1	ceRNA	ZNF800	134	77	11	1.40741	1.15521	8.3038	1.00833e-16	1.15111e-09	ABI1;CREB1;CRK;FOXO1;KRAS;MAPK1;PKN2;PTPN12;RAB5A;RASA1;SP1
474	Hedgehog	ceRNA	SEMA6D	16	6	3	0.112339	0.325053	8.88367	6.469e-19	7.38503e-12	DYRK1A;GLI3;PTCH1
475	Hedgehog	ceRNA	TCF4	16	6	4	0.112339	0.325053	11.9601	5.74926e-33	6.56337e-26	DYRK1A;GAS1;PTCH1;SIN3A
476	ID	ceRNA	ATL2	14	7	3	0.154901	0.377301	7.54067	4.67563e-14	5.33771e-07	ELK3;ID4;RB1
477	ID	ceRNA	CELF2	14	7	3	0.154901	0.377301	7.54067	4.67563e-14	5.33771e-07	ELK3;ID4;RB1
478	ID	ceRNA	CPEB3	14	7	3	0.154901	0.377301	7.54067	4.67563e-14	5.33771e-07	ELK3;ID4;RB1
479	ID	ceRNA	DLC1	14	7	3	0.154901	0.377301	7.54067	4.67563e-14	5.33771e-07	ELK3;ID4;RB1
480	ID	ceRNA	PHF6	14	7	3	0.154901	0.377301	7.54067	4.67563e-14	5.33771e-07	CDK2;ELK3;RB1
481	KitReceptor	ceRNA	ANKIB1	53	27	7	0.607735	0.752864	8.4906	2.05573e-17	2.34683e-10	EP300;MAPK1;RASA1;SOCS5;SOCS6;SOS1;YES1
482	KitReceptor	ceRNA	ARID4A	53	27	8	0.607735	0.752864	9.81886	9.33937e-23	1.06619e-15	CLTC;CRK;EP300;PIK3R1;SOCS5;SOCS6;SOS1;SPRED1
483	KitReceptor	ceRNA	ARID4B	53	27	8	0.607735	0.752864	9.81886	9.33937e-23	1.06619e-15	CRK;EP300;MAPK1;RASA1;SOCS5;SOCS6;SOS1;SPRED1
484	KitReceptor	ceRNA	ATP2B1	53	27	7	0.607735	0.752864	8.4906	2.05573e-17	2.34683e-10	EP300;KHDRBS1;MAPK1;RASA1;SOCS5;SOCS6;SPRED1
485	KitReceptor	ceRNA	ATRX	53	27	7	0.607735	0.752864	8.4906	2.05573e-17	2.34683e-10	KITLG;MAPK1;RASA1;SOCS5;SOCS6;SOS1;YES1
486	KitReceptor	ceRNA	BBX	53	27	7	0.607735	0.752864	8.4906	2.05573e-17	2.34683e-10	CRK;EP300;RASA1;SOCS5;SOCS6;SOS1;SPRED1
487	KitReceptor	ceRNA	BCL11A	53	27	8	0.607735	0.752864	9.81886	9.33937e-23	1.06619e-15	CLTC;PRKCB;SH3KBP1;SOCS5;SOCS6;SOS1;SPRED1;SPRED2
488	KitReceptor	ceRNA	BTAF1	53	27	6	0.607735	0.752864	7.16234	7.93114e-13	9.05421e-06	MAPK1;RASA1;SOCS5;SOCS6;SOS1;SPRED1
489	KitReceptor	ceRNA	BTBD7	53	27	6	0.607735	0.752864	7.16234	7.93114e-13	9.05421e-06	CRK;MAPK1;SOCS5;SOCS6;SOS1;SPRED1
490	KitReceptor	ceRNA	CCNT2	53	27	6	0.607735	0.752864	7.16234	7.93114e-13	9.05421e-06	CRK;EP300;SOCS5;SOCS6;SOS1;SPRED1
491	KitReceptor	ceRNA	CDK17	53	27	10	0.607735	0.752864	12.4754	1.01694e-35	1.16094e-28	CLTC;CRK;EP300;KIT;MAPK1;PTPN11;RASA1;SOCS5;SOCS6;SOS1
492	KitReceptor	ceRNA	CELF2	53	27	6	0.607735	0.752864	7.16234	7.93114e-13	9.05421e-06	EP300;PIK3R1;PRKCB;SH3KBP1;SOS1;SPRED1
493	KitReceptor	ceRNA	CHD9	53	27	7	0.607735	0.752864	8.4906	2.05573e-17	2.34683e-10	CLTC;EP300;MAPK1;SOCS5;SOCS6;SOS1;SPRED1
494	KitReceptor	ceRNA	CNOT6L	53	27	7	0.607735	0.752864	8.4906	2.05573e-17	2.34683e-10	EP300;MAPK1;RASA1;SOCS5;SOCS6;SOS1;SPRED1
495	KitReceptor	ceRNA	CPEB2	53	27	7	0.607735	0.752864	8.4906	2.05573e-17	2.34683e-10	EP300;KITLG;RASA1;SOCS5;SOCS6;SOS1;SPRED1
496	KitReceptor	ceRNA	CPEB3	53	27	6	0.607735	0.752864	7.16234	7.93114e-13	9.05421e-06	CRK;KIT;RASA1;SOCS5;SOCS6;SOS1
497	KitReceptor	ceRNA	CPEB4	53	27	6	0.607735	0.752864	7.16234	7.93114e-13	9.05421e-06	CLTC;MAPK1;SOCS5;SOCS6;SOS1;SPRED1
498	KitReceptor	ceRNA	CREBRF	53	27	9	0.607735	0.752864	11.1471	7.39782e-29	8.44537e-22	EP300;JAK2;MAPK1;PIK3R1;RAF1;SOCS5;SOCS6;SOS1;SPRED1
499	KitReceptor	ceRNA	DDX3X	53	27	7	0.607735	0.752864	8.4906	2.05573e-17	2.34683e-10	EP300;MAPK1;RASA1;SOCS5;SOCS6;SOS1;SPRED1
500	KitReceptor	ceRNA	DIP2C	53	27	6	0.607735	0.752864	7.16234	7.93114e-13	9.05421e-06	CLTC;EP300;MAPK1;RASA1;SOCS5;SOS1
501	KitReceptor	ceRNA	ELK3	53	27	8	0.607735	0.752864	9.81886	9.33937e-23	1.06619e-15	EP300;KIT;MAPK1;PRKCA;SOCS5;SOCS6;SOS1;SPRED1
502	KitReceptor	ceRNA	FAM179B	53	27	8	0.607735	0.752864	9.81886	9.33937e-23	1.06619e-15	CLTC;MAPK1;RAF1;RASA1;SOCS5;SOCS6;SOS1;SPRED1
503	KitReceptor	ceRNA	FMR1	53	27	8	0.607735	0.752864	9.81886	9.33937e-23	1.06619e-15	EP300;MAPK1;PTPN11;RASA1;SOCS5;SOS1;STAT5B;YES1
504	KitReceptor	ceRNA	FOXJ3	53	27	8	0.607735	0.752864	9.81886	9.33937e-23	1.06619e-15	CLTC;CRK;EP300;MAPK1;PIK3R1;SOCS5;SOS1;SPRED1
505	KitReceptor	ceRNA	FRS2	53	27	6	0.607735	0.752864	7.16234	7.93114e-13	9.05421e-06	CRK;CRKL;RASA1;SOCS5;SOCS6;SOS1
506	KitReceptor	ceRNA	FUBP3	53	27	7	0.607735	0.752864	8.4906	2.05573e-17	2.34683e-10	CLTC;CRKL;EP300;MAPK1;SOCS6;SOS1;SPRED1
507	KitReceptor	ceRNA	G3BP2	53	27	6	0.607735	0.752864	7.16234	7.93114e-13	9.05421e-06	CLTC;MAPK1;RASA1;SOCS5;SOS1;SPRED1
508	KitReceptor	ceRNA	GMFB	53	27	7	0.607735	0.752864	8.4906	2.05573e-17	2.34683e-10	CRK;EP300;MAPK1;RASA1;SOCS6;SOS1;SPRED1
509	KitReceptor	ceRNA	HIAT1	53	27	9	0.607735	0.752864	11.1471	7.39782e-29	8.44537e-22	CLTC;CRK;EP300;JAK2;MAPK1;RASA1;SOCS6;SOS1;SPRED1
510	KitReceptor	ceRNA	HIVEP2	53	27	7	0.607735	0.752864	8.4906	2.05573e-17	2.34683e-10	CRK;EP300;MAPK1;PRKCA;SOCS5;SOS1;SPRED1
511	KitReceptor	ceRNA	KLHL15	53	27	7	0.607735	0.752864	8.4906	2.05573e-17	2.34683e-10	CRK;MAPK1;RASA1;SOCS5;SOCS6;SOS1;SPRED1
512	KitReceptor	ceRNA	KPNA3	53	27	9	0.607735	0.752864	11.1471	7.39782e-29	8.44537e-22	MAPK1;PTPN11;RASA1;SH3KBP1;SOCS5;SOCS6;SOS1;SPRED1;YES1
513	KitReceptor	ceRNA	LCOR	53	27	8	0.607735	0.752864	9.81886	9.33937e-23	1.06619e-15	CLTC;CRKL;MAPK1;RASA1;SOCS5;SOCS6;SOS1;SPRED1
514	KitReceptor	ceRNA	LCORL	53	27	8	0.607735	0.752864	9.81886	9.33937e-23	1.06619e-15	CLTC;CRK;EP300;MAPK1;RASA1;SOCS5;SOCS6;SOS1
515	KitReceptor	ceRNA	MAF	53	27	6	0.607735	0.752864	7.16234	7.93114e-13	9.05421e-06	EP300;PRKCB;RASA1;SH3KBP1;SOCS5;SOS1
516	KitReceptor	ceRNA	MAP3K1	53	27	8	0.607735	0.752864	9.81886	9.33937e-23	1.06619e-15	CRK;EP300;RASA1;SH3KBP1;SOCS5;SOCS6;SOS1;SPRED1
517	KitReceptor	ceRNA	MIER3	53	27	7	0.607735	0.752864	8.4906	2.05573e-17	2.34683e-10	EP300;KITLG;MAPK1;RASA1;SOCS5;SOCS6;SOS1
518	KitReceptor	ceRNA	MLL3	53	27	6	0.607735	0.752864	7.16234	7.93114e-13	9.05421e-06	EP300;RASA1;SOCS5;SOCS6;SOS1;YES1
519	KitReceptor	ceRNA	MTDH	53	27	6	0.607735	0.752864	7.16234	7.93114e-13	9.05421e-06	CLTC;CRKL;EP300;MAPK1;RASA1;SOS1
520	KitReceptor	ceRNA	MTF1	53	27	8	0.607735	0.752864	9.81886	9.33937e-23	1.06619e-15	CRK;MAPK1;RASA1;SOCS5;SOCS6;SOS1;SPRED1;YES1
521	KitReceptor	ceRNA	NAV3	53	27	6	0.607735	0.752864	7.16234	7.93114e-13	9.05421e-06	CLTC;PIK3R1;RASA1;SOCS5;SOCS6;SOS1
522	KitReceptor	ceRNA	NBEA	53	27	7	0.607735	0.752864	8.4906	2.05573e-17	2.34683e-10	EP300;KIT;MAPK1;RASA1;SOCS5;SOS1;SPRED1
523	KitReceptor	ceRNA	NFIB	53	27	7	0.607735	0.752864	8.4906	2.05573e-17	2.34683e-10	KIT;PIK3R1;SH3KBP1;SOCS5;SOS1;SPRED1;YES1
524	KitReceptor	ceRNA	NUFIP2	53	27	6	0.607735	0.752864	7.16234	7.93114e-13	9.05421e-06	MAPK1;RAF1;RASA1;SOCS5;SOCS6;SOS1
525	KitReceptor	ceRNA	OTUD4	53	27	7	0.607735	0.752864	8.4906	2.05573e-17	2.34683e-10	CRKL;EP300;MAPK1;SOCS5;SOCS6;SOS1;SPRED1
526	KitReceptor	ceRNA	PELI1	53	27	6	0.607735	0.752864	7.16234	7.93114e-13	9.05421e-06	RASA1;SH3KBP1;SOCS5;SOCS6;SOS1;SPRED1
[truncated: 513 more rows]

## Sheet: EHMN
No.	Pathway	Regulator		Number of genes			Poisson binomial test					List of targets
[truncated: 1,114 more rows]

[truncated: 14 more sheets: HumanCyc, INOH, KEGG, NetPath, PharmGKB, PID, Reactome, SA, SIG, Signalink, SMPDB, STKE, SuperArray, Wikipathways]
